# Supplementary material for: A Sight of the Diagnostic Value of Aberrant Cell-Free DNA Methylation in Lung Cancer
Source: Hindawi journal article supplement (doi:10.1155/2022/9619357), 2022-01-27

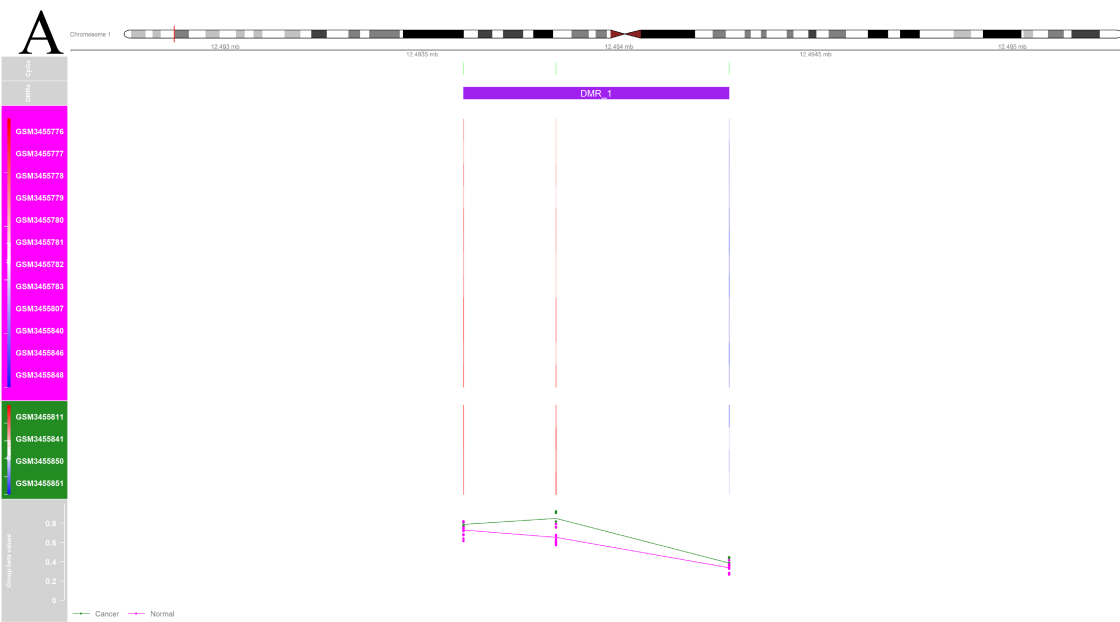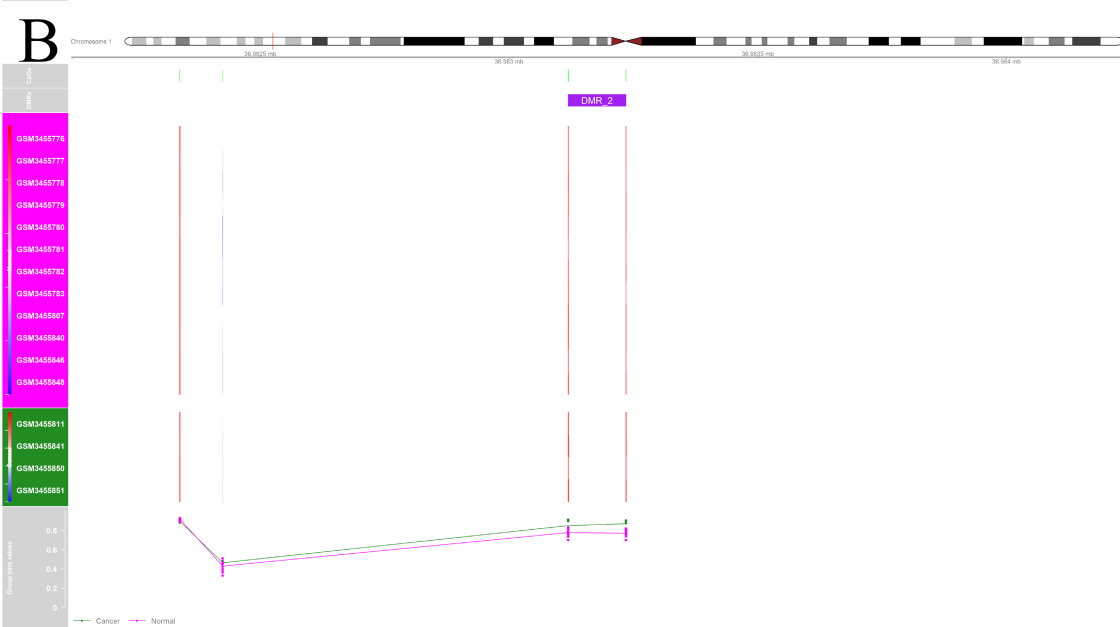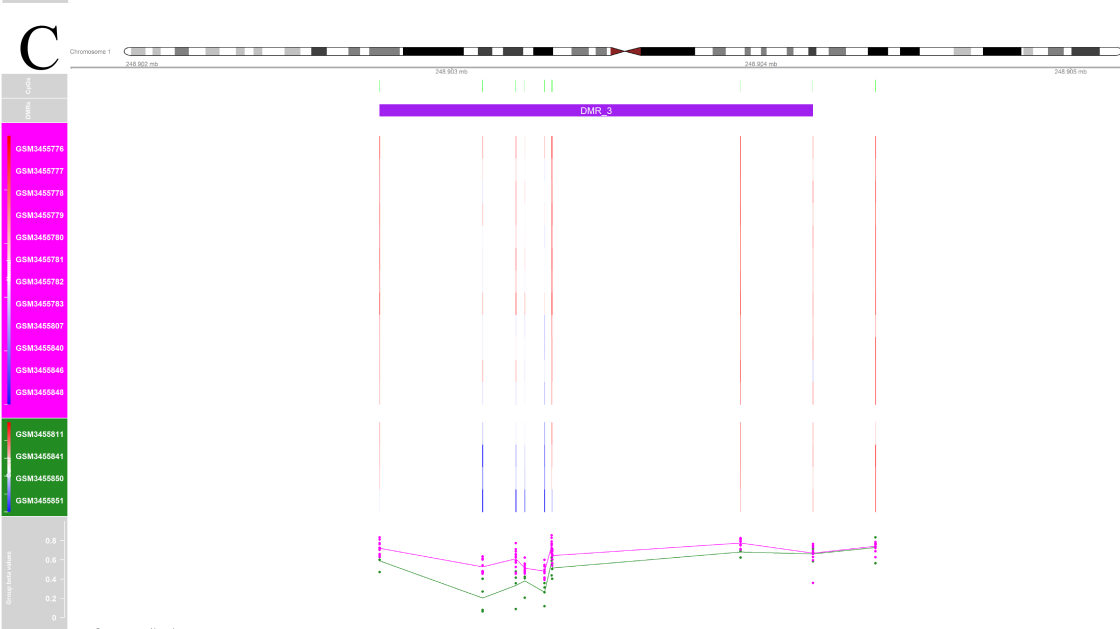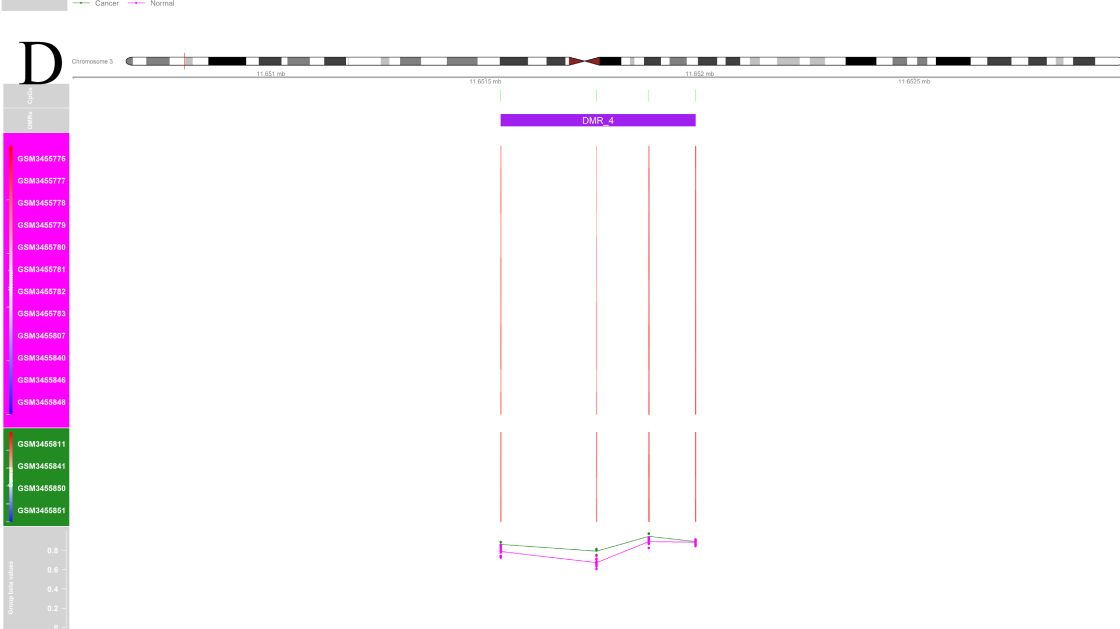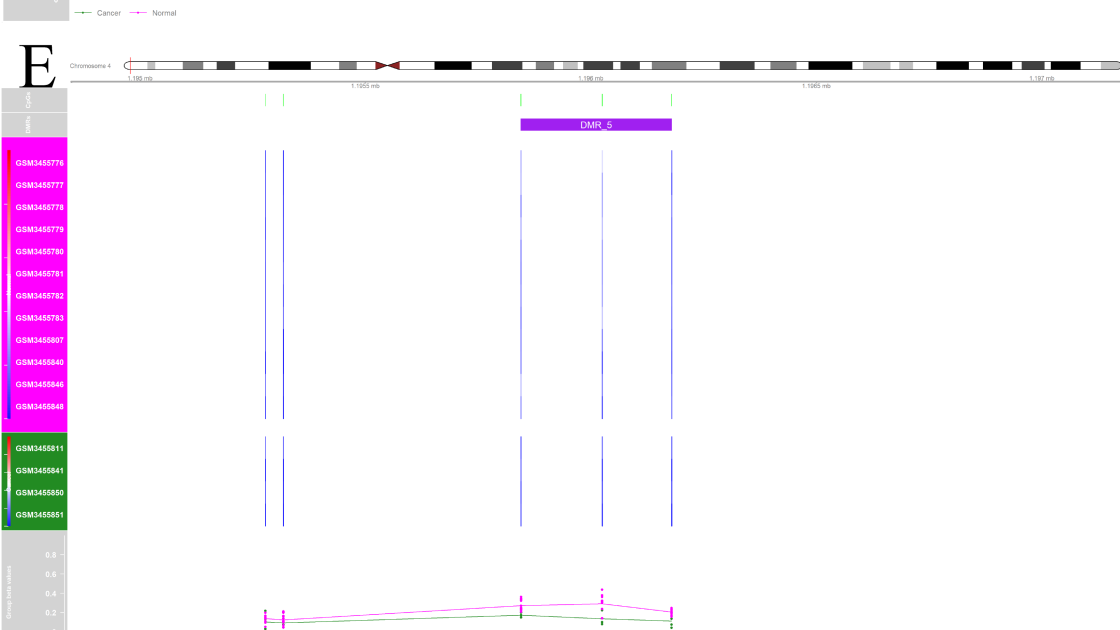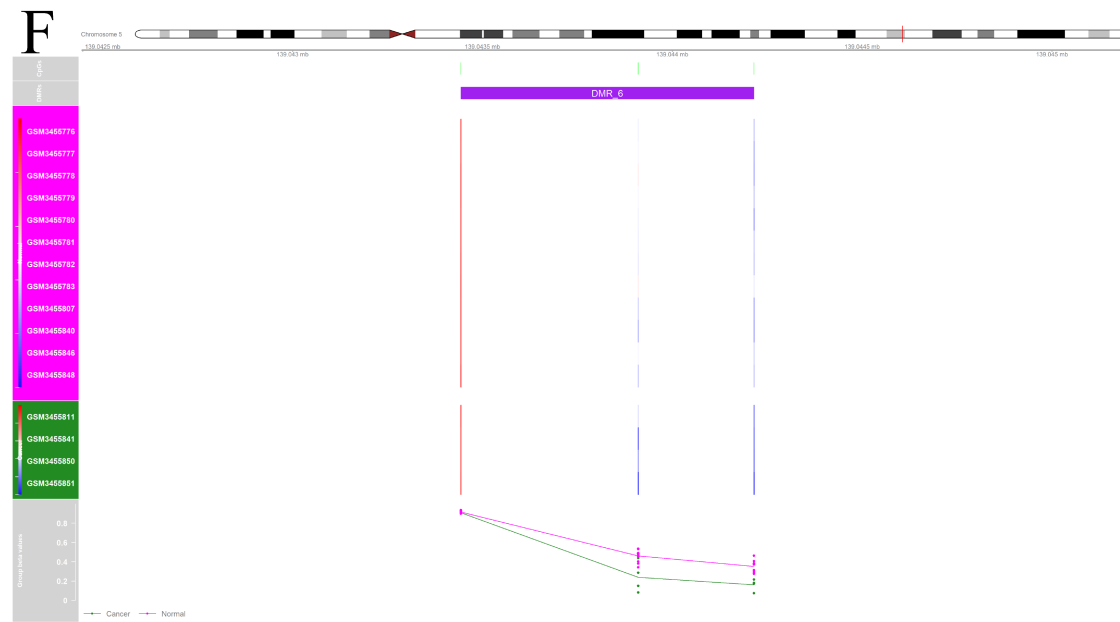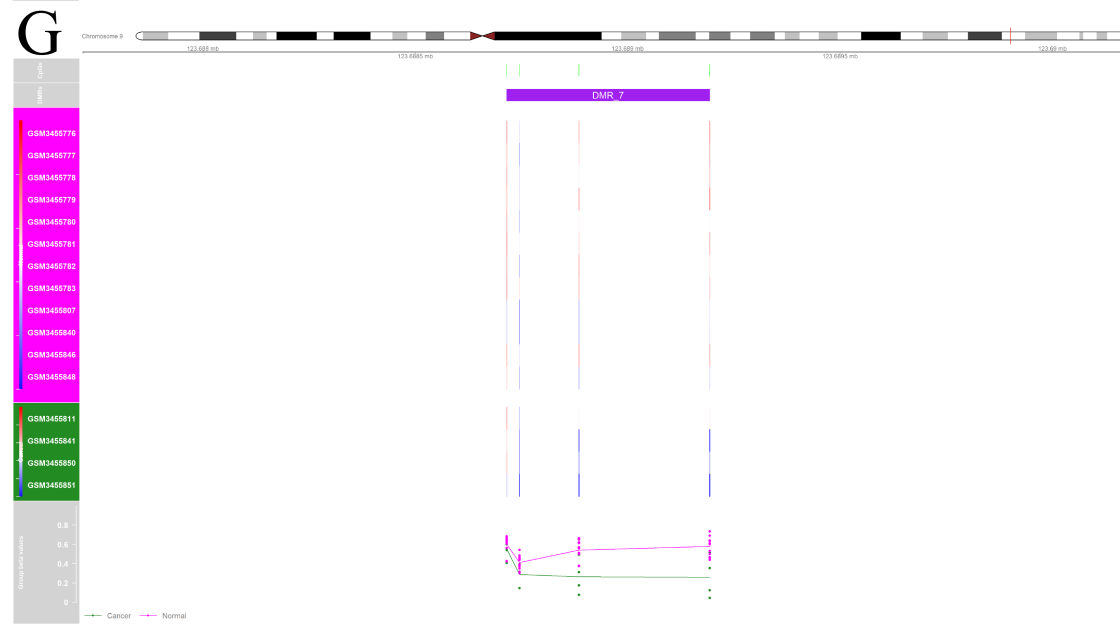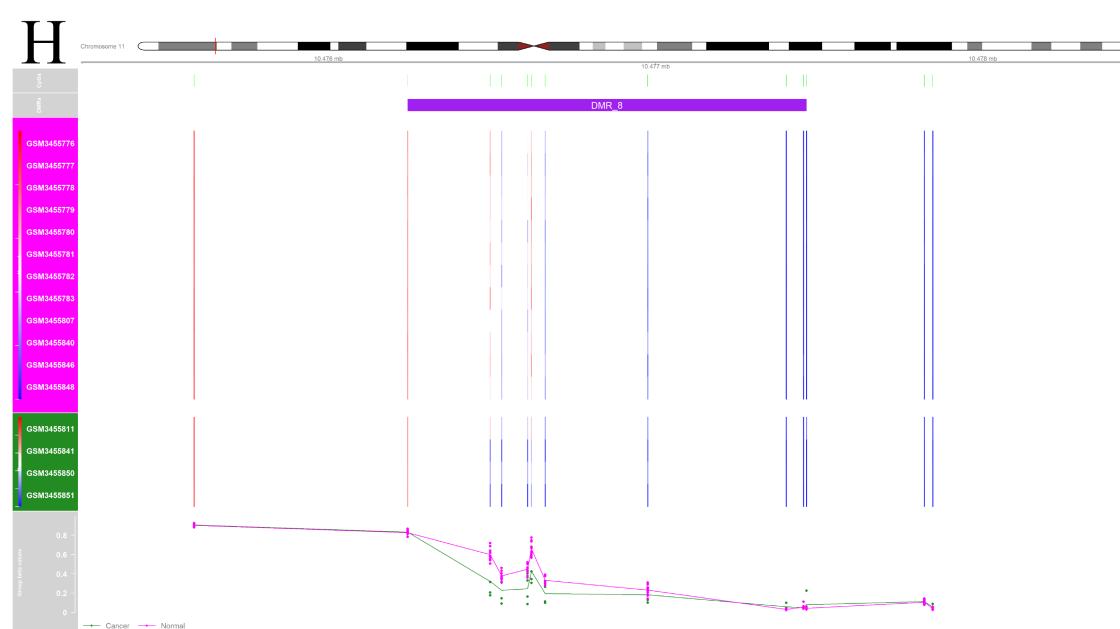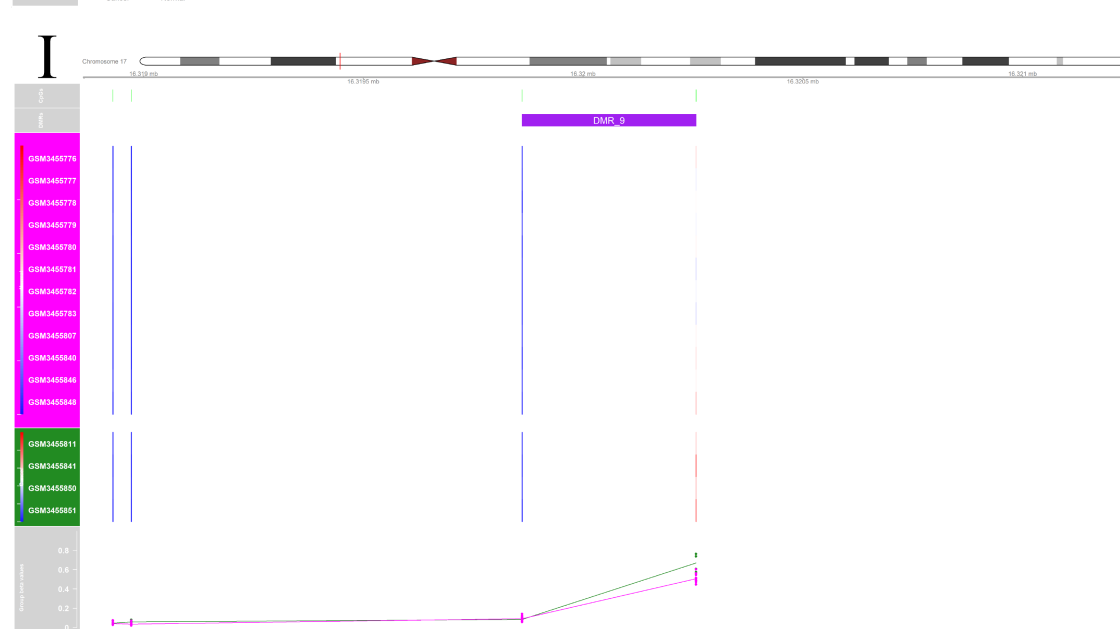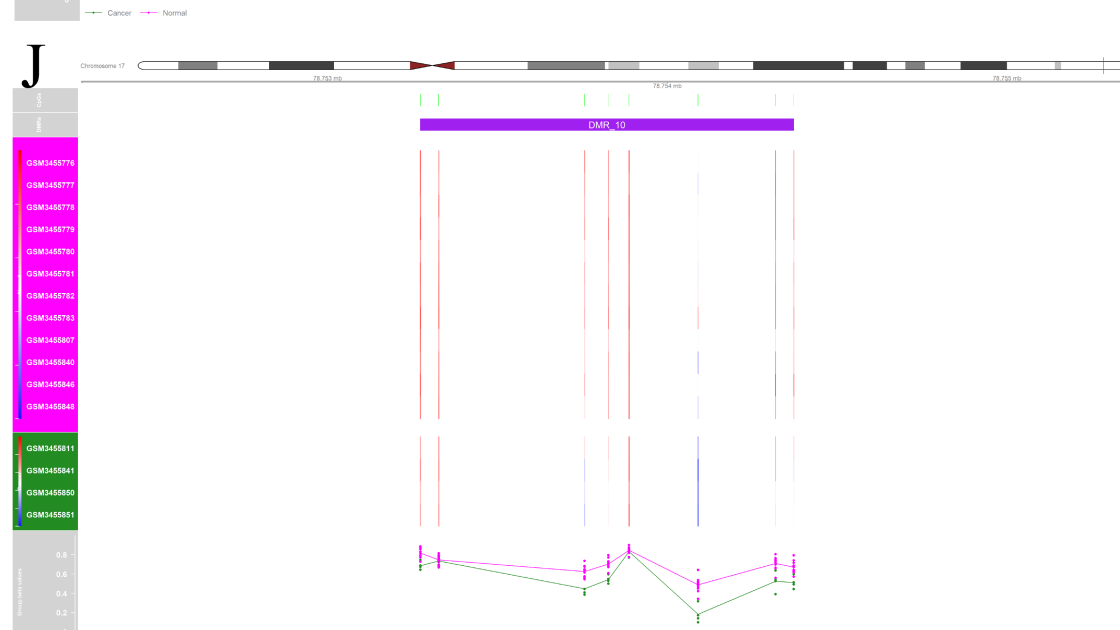

Supplement: f1 [file 9619357.f1.pdf]
