# Supplementary material for: A Sight of the Diagnostic Value of Aberrant Cell-Free DNA Methylation in Lung Cancer
Source: Hindawi journal article supplement (doi:10.1155/2022/9619357), 2022-01-27

A

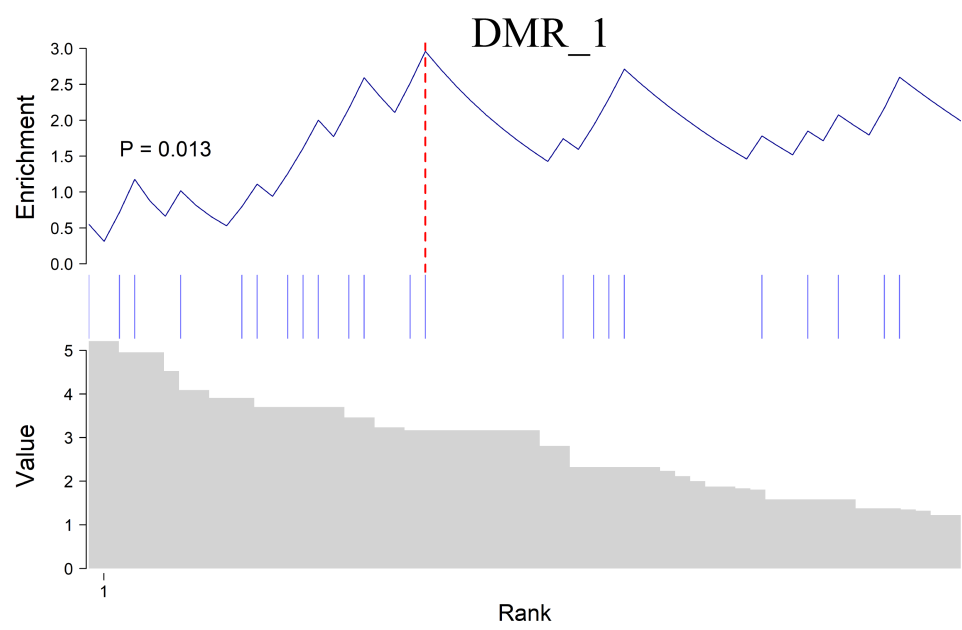

B

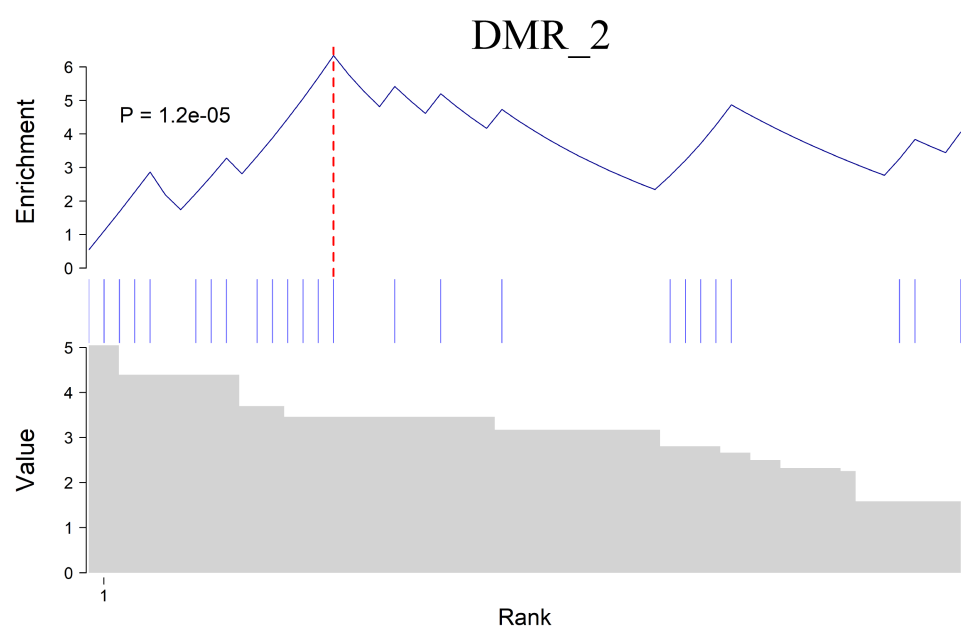

C

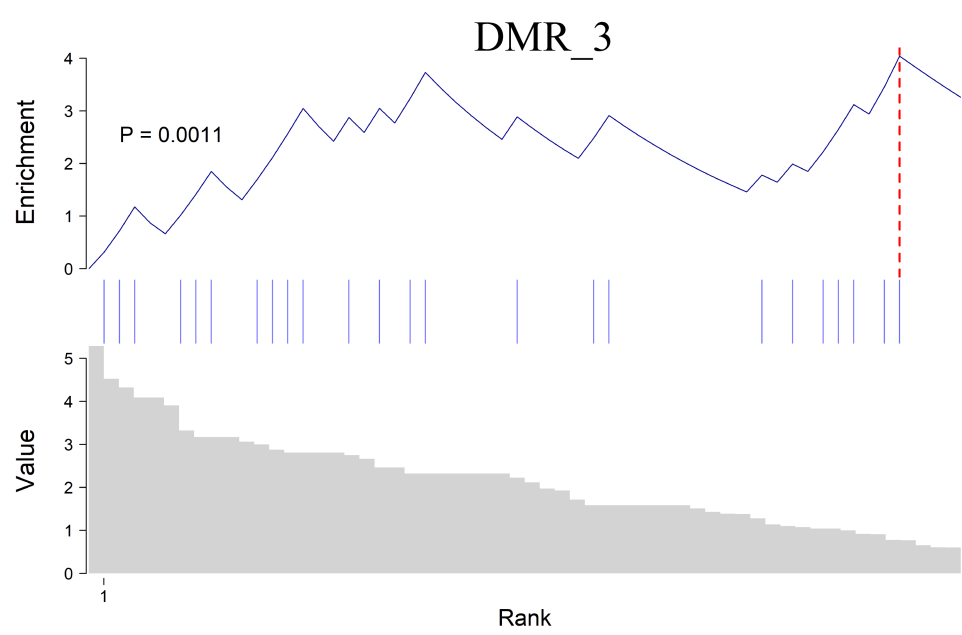

D

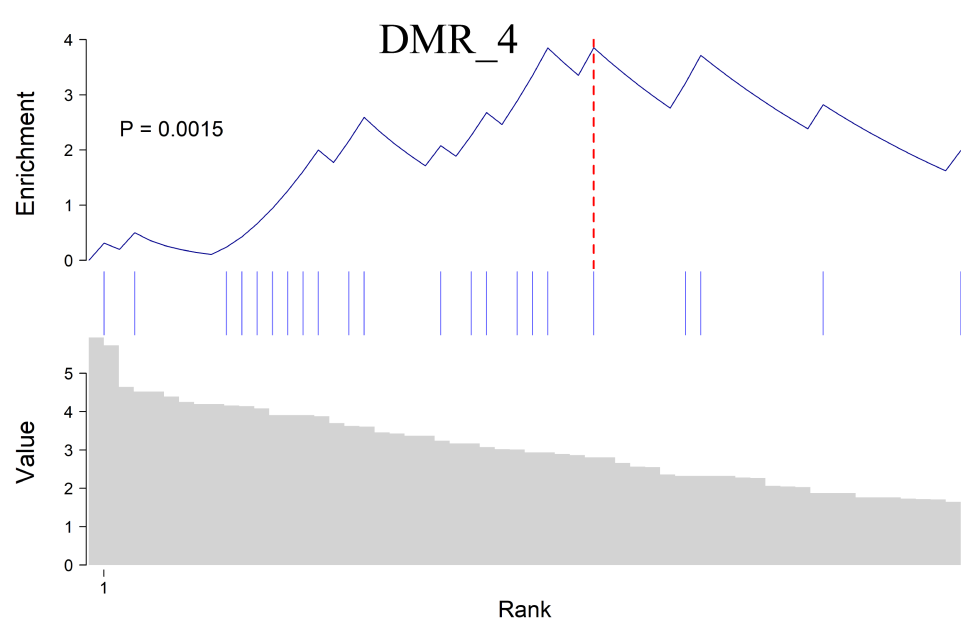

E

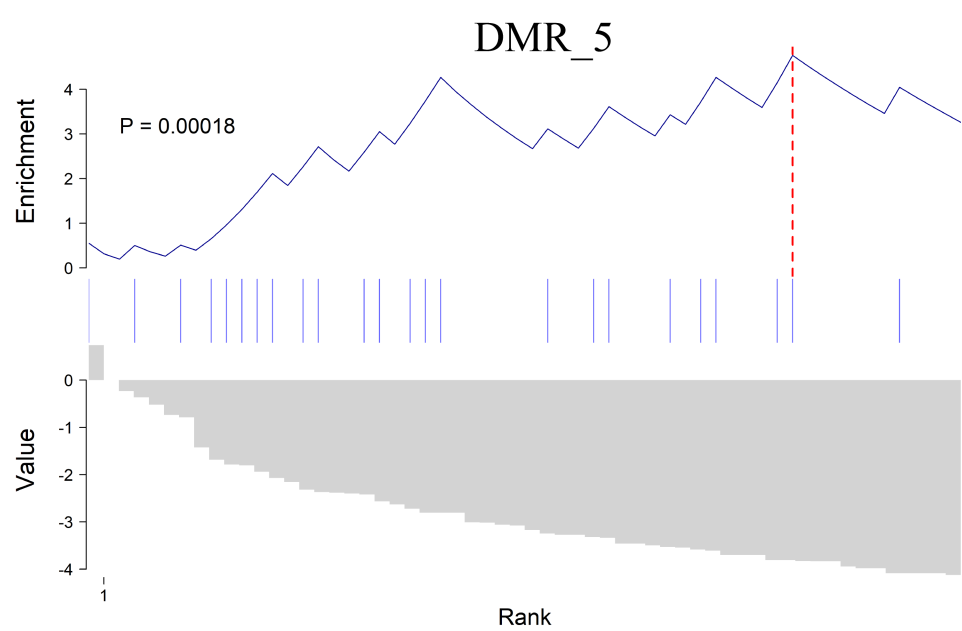

F

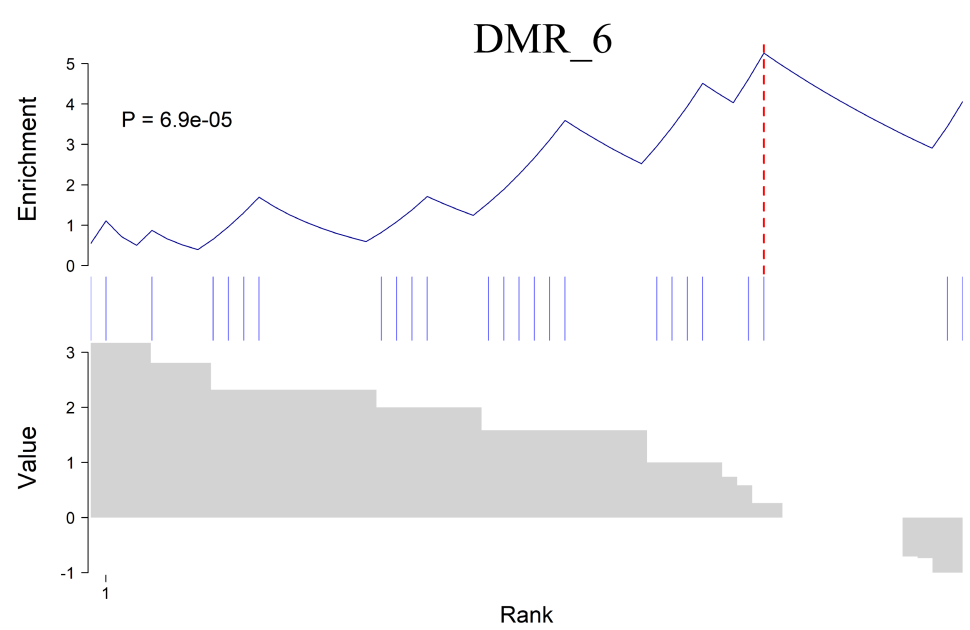

G

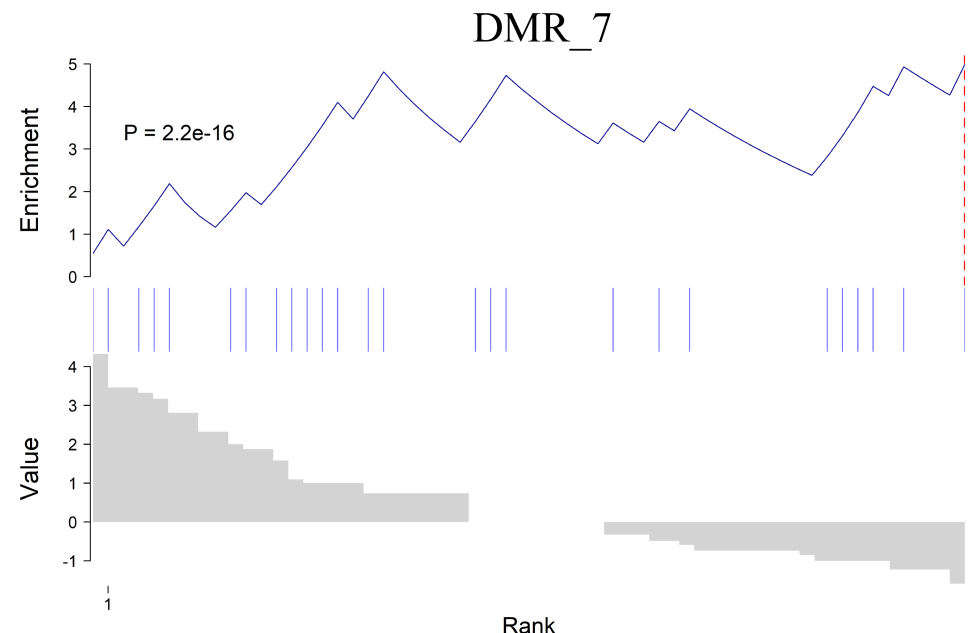

H

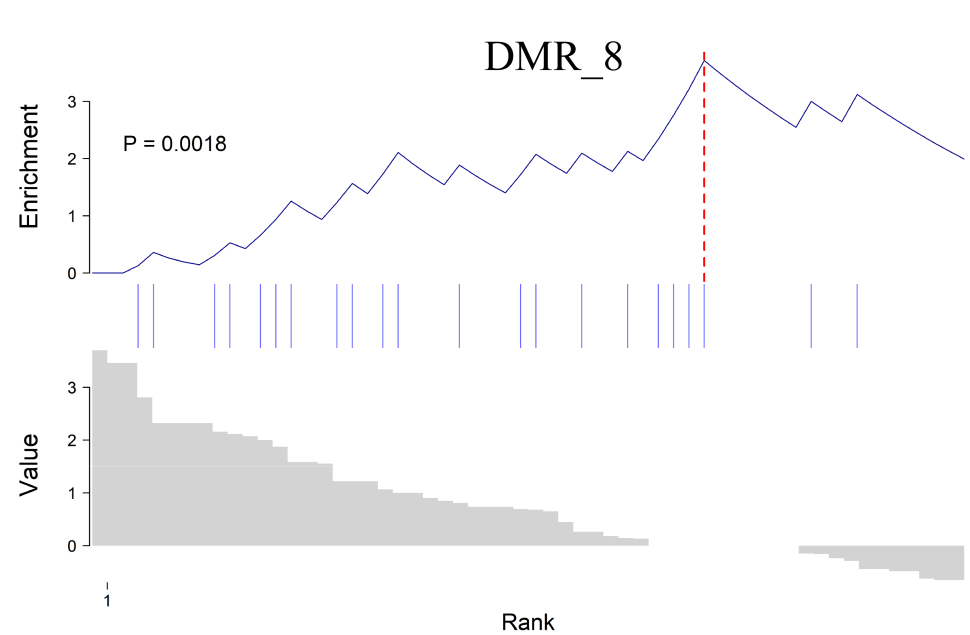

I

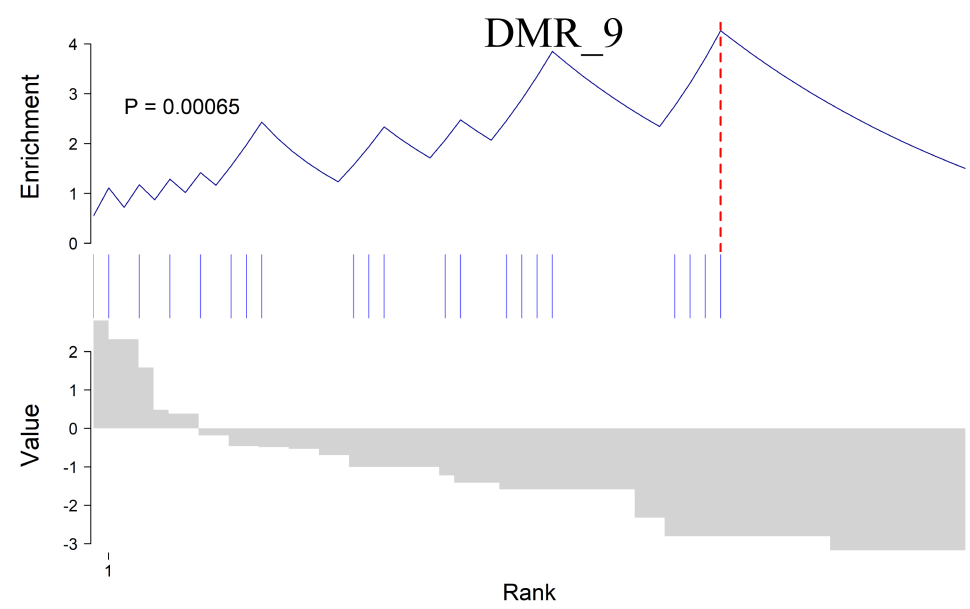

J

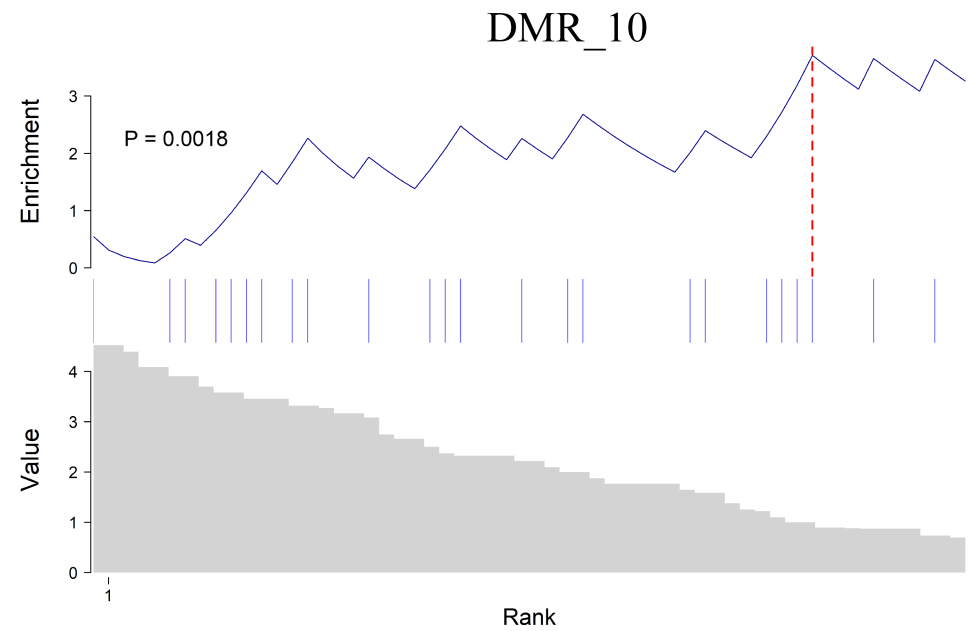

Supplement: f2 [file 9619357.f2.pdf]
