# Supplementary material for: A Sight of the Diagnostic Value of Aberrant Cell-Free DNA Methylation in Lung Cancer
Source: Hindawi journal article supplement (doi:10.1155/2022/9619357), 2022-01-27
Supplement: f5 [file 9619357.f5.pdf]

**Table S2. Differently methylated regions detected in cfDNA samples**

| seqnames | start     | end       | width | strand | no.cpgs | min_smoothed_fdr | Stouffer    | HMFDR       | Fisher      | maxdiff      | meandiff     | overlapping_genes    |
|----------|-----------|-----------|-------|--------|---------|------------------|-------------|-------------|-------------|--------------|--------------|----------------------|
| chr8     | 57471162  | 57473034  | 1873  | *      | 7       | 8.40313E-89      | 9.23481E-12 | 5.54156E-05 | 7.47857E-12 | -0.391331342 | -0.178883561 | LINC00968            |
| chr17    | 504991    | 505019    | 29    | *      | 2       | 2.91964E-43      | 1.01497E-06 | 7.43082E-05 | 1.85744E-06 | -0.232243338 | -0.196953154 | VPS53                |
| chr18    | 9782387   | 9782637   | 251   | *      | 2       | 2.45161E-37      | 2.99906E-05 | 7.52076E-05 | 2.32338E-05 | -0.271725761 | -0.190481921 | RAB31                |
| chr1     | 94454318  | 94454989  | 672   | *      | 2       | 8.47897E-40      | 2.75162E-07 | 7.7036E-05  | 6.20377E-07 | -0.326708972 | -0.310175341 |                      |
| chr4     | 83383646  | 83384006  | 361   | *      | 2       | 6.45012E-32      | 0.003155768 | 8.23353E-05 | 0.000255977 | -0.250398387 | -0.142990446 |                      |
| chr16    | 54169984  | 54170217  | 234   | *      | 2       | 1.51675E-37      | 5.04986E-08 | 8.24423E-05 | 1.36785E-07 | -0.342251445 | -0.312857032 |                      |
| chr16    | 4463520   | 4464427   | 908   | *      | 2       | 5.92942E-36      | 0.001087205 | 8.67423E-05 | 0.000179234 | 0.21258547   | 0.095964797  | CORO7-PAM16, CORO7   |
| chr12    | 109538736 | 109539174 | 439   | *      | 2       | 3.13612E-31      | 0.004303464 | 8.67469E-05 | 0.00029294  | -0.440756    | -0.232337826 | UNG                  |
| chr1     | 235820710 | 235821511 | 802   | *      | 2       | 4.81932E-32      | 0.014384457 | 8.67487E-05 | 0.000389906 | -0.413198424 | -0.211867023 |                      |
| chr11    | 117280371 | 117280644 | 274   | *      | 2       | 8.77541E-31      | 0.017749666 | 8.67488E-05 | 0.000404066 | -0.402358353 | -0.194543836 | CEP164               |
| chr11    | 122080867 | 122081755 | 889   | *      | 2       | 3.39013E-30      | 0.000619107 | 8.71915E-05 | 0.000140308 | -0.323398309 | -0.182725774 | RP11-820L6.1         |
| chr1     | 38316406  | 38317368  | 963   | *      | 2       | 1.89717E-29      | 0.006331677 | 8.8212E-05  | 0.000330229 | -0.316193226 | -0.164761978 | MTF1                 |
| chr2     | 174025831 | 174025843 | 13    | *      | 2       | 6.74789E-39      | 5.68876E-08 | 8.84365E-05 | 1.53811E-07 | -0.433807194 | -0.41848839  | MLTK                 |
| chr8     | 28974423  | 28974428  | 6     | *      | 2       | 1.44154E-33      | 9.13782E-08 | 0.000104661 | 2.42268E-07 | -0.283814671 | -0.283354015 | CTD-2647L4.1, KIF13B |
| chr13    | 30434282  | 30434395  | 114   | *      | 2       | 8.83767E-33      | 1.15334E-07 | 0.000107984 | 3.00858E-07 | -0.422321225 | -0.324964369 |                      |
| chr12    | 113799660 | 113799663 | 4     | *      | 2       | 6.16977E-33      | 9.90588E-08 | 0.000108915 | 2.62064E-07 | -0.336335245 | -0.294330622 | PLBD2                |
| chr6     | 75898357  | 75899060  | 704   | *      | 2       | 7.72875E-29      | 0.001510008 | 0.000111457 | 0.000243551 | -0.36447455  | -0.192547998 | COL12A1              |
| chr3     | 66492298  | 66492992  | 695   | *      | 2       | 4.83367E-30      | 0.001813104 | 0.000111458 | 0.000261927 | -0.257396131 | -0.134962959 | LRIG1                |
| chr20    | 31070190  | 31070849  | 660   | *      | 2       | 2.161E-30        | 0.003508408 | 0.000111462 | 0.000332105 | -0.250011334 | -0.128785914 | C20orf112            |
| chr2     | 223709146 | 223709253 | 108   | *      | 2       | 8.37516E-28      | 2.73953E-06 | 0.000111861 | 4.64659E-06 | -0.274429318 | -0.239650376 |                      |
| chr6     | 90031402  | 90031462  | 61    | *      | 2       | 8.13792E-24      | 0.000198669 | 0.000113046 | 9.11839E-05 | -0.245690253 | -0.170690332 |                      |
| chr15    | 57317829  | 57317980  | 152   | *      | 2       | 1.16876E-23      | 0.000902323 | 0.000113075 | 0.000197254 | -0.361225285 | -0.19844657  | TCF12                |
| chr8     | 37650291  | 37650963  | 673   | *      | 2       | 4.04142E-27      | 0.02567203  | 0.00011309  | 0.000534636 | -0.292334459 | -0.150953084 | GPR124               |
| chr1     | 6142608   | 6142719   | 112   | *      | 2       | 3.34284E-34      | 9.6925E-08  | 0.000113614 | 2.58113E-07 | -0.407014115 | -0.381117377 | KCNAB2               |
| chr8     | 38024119  | 38024747  | 629   | *      | 3       | 1.3262E-44       | 3.23794E-06 | 0.000116612 | 1.73791E-06 | -0.314520334 | -0.165418273 | LSM1                 |
| chr7     | 72856462  | 72856835  | 374   | *      | 2       | 6.13983E-31      | 1.23942E-07 | 0.000126564 | 3.27406E-07 | -0.414164772 | -0.327603627 | BAZ1B                |
| chr9     | 107953895 | 107954218 | 324   | *      | 2       | 3.36877E-31      | 1.16819E-07 | 0.000127286 | 3.10299E-07 | -0.390716199 | -0.383794865 |                      |

|       |           |           |      |   |   |             |             |             |             |              |              |                         |
|-------|-----------|-----------|------|---|---|-------------|-------------|-------------|-------------|--------------|--------------|-------------------------|
| chr2  | 31454631  | 31455457  | 827  | * | 3 | 7.41631E-40 | 2.45086E-05 | 0.000128983 | 9.93095E-06 | -0.307077976 | -0.153079483 | CAPN14                  |
| chr5  | 177756270 | 177757945 | 1676 | * | 3 | 2.66183E-34 | 0.014035516 | 0.000130751 | 0.000392059 | -0.37109686  | -0.152200546 | COL23A1                 |
| chr9  | 486351    | 486354    | 4    | * | 2 | 1.04124E-27 | 5.17309E-07 | 0.000135445 | 1.19287E-06 | -0.331904086 | -0.286868535 | KANK1, RP11-165F24.3    |
| chr14 | 87179265  | 87179368  | 104  | * | 2 | 7.40412E-25 | 7.62667E-06 | 0.000138196 | 1.10841E-05 | -0.383728689 | -0.239798958 |                         |
| chr2  | 106814630 | 106814741 | 112  | * | 2 | 1.53306E-26 | 1.59486E-06 | 0.000138868 | 3.15136E-06 | -0.380480571 | -0.277157543 |                         |
| chr14 | 21089025  | 21089395  | 371  | * | 2 | 3.00864E-25 | 4.57808E-05 | 0.000138882 | 4.05778E-05 | -0.270931049 | -0.09563883  |                         |
| chr1  | 198901839 | 198902062 | 224  | * | 2 | 1.01095E-28 | 1.93104E-07 | 0.000145682 | 4.99244E-07 | -0.349324738 | -0.317608782 | MIR181A1HG              |
| chr11 | 10457727  | 10458246  | 520  | * | 2 | 9.38715E-24 | 0.004088238 | 0.00014602  | 0.000426649 | -0.401919611 | -0.211161603 | AMPD3                   |
| chr10 | 52157789  | 52158244  | 456  | * | 2 | 3.26474E-23 | 0.004847679 | 0.000146021 | 0.000450836 | -0.337462962 | -0.188831645 | SGMS1                   |
| chr11 | 8385712   | 8385767   | 56   | * | 2 | 5.1828E-24  | 5.6421E-06  | 0.0001506   | 9.00432E-06 | -0.296732385 | -0.265147643 |                         |
| chr11 | 32610465  | 32611002  | 538  | * | 2 | 2.87478E-23 | 0.018079986 | 0.00015207  | 0.000647845 | -0.344043681 | -0.178454647 | EIF3M                   |
| chr11 | 112193244 | 112193518 | 275  | * | 2 | 3.93274E-21 | 0.045408201 | 0.000152561 | 0.000740377 | -0.431413956 | -0.214511156 | RP11-356J5.12           |
| chr2  | 102771739 | 102772623 | 885  | * | 4 | 2.93989E-44 | 0.001599886 | 0.000154038 | 1.01073E-05 | -0.356838194 | -0.155641089 | IL1R1                   |
| chr13 | 37028408  | 37028767  | 360  | * | 2 | 3.26748E-21 | 0.211915551 | 0.00015726  | 0.000818794 | -0.305817057 | -0.151625119 |                         |
| chr21 | 16868337  | 16869510  | 1174 | * | 5 | 4.68331E-53 | 2.62269E-06 | 0.000160515 | 2.30467E-07 | -0.381334398 | -0.113047362 | AJ009632.3              |
| chr16 | 1934273   | 1935058   | 786  | * | 4 | 1.39974E-37 | 0.000992466 | 0.000161253 | 0.000133522 | -0.240560077 | -0.068960077 | MEIOB                   |
| chr5  | 93905343  | 93906294  | 952  | * | 4 | 5.99298E-42 | 7.32384E-09 | 0.00016296  | 1.72402E-08 | 0.444885696  | 0.244372194  | RP11-461G12.2, KIAA0825 |
| chr5  | 55442750  | 55444106  | 1357 | * | 5 | 1.04787E-54 | 6.43549E-08 | 0.000165931 | 1.00887E-08 | -0.317064896 | -0.168319446 | ANKRD55                 |
| chr5  | 176329146 | 176329724 | 579  | * | 2 | 2.638E-26   | 3.16554E-07 | 0.000170282 | 7.97632E-07 | -0.400481592 | -0.317106798 |                         |
| chr12 | 14537885  | 14538000  | 116  | * | 2 | 4.03616E-19 | 0.101592921 | 0.000171074 | 0.000866677 | -0.112204199 | -0.055273505 | ATF7IP                  |
| chr2  | 70681570  | 70682536  | 967  | * | 3 | 1.69895E-35 | 7.68645E-08 | 0.000175026 | 1.43574E-07 | -0.403805281 | -0.234908488 | TGFA                    |
| chr5  | 34001680  | 34001718  | 39   | * | 2 | 3.05681E-22 | 1.09243E-05 | 0.000175591 | 1.57963E-05 | -0.427720866 | -0.323879142 | AMACR, RP11-1084J3.4    |
| chr8  | 134094692 | 134095284 | 593  | * | 2 | 5.68937E-23 | 0.000221469 | 0.000176733 | 0.000123579 | -0.265784462 | -0.105665234 | TG, SLA                 |
| chr11 | 119486443 | 119486923 | 481  | * | 2 | 1.22286E-22 | 0.00301843  | 0.000176838 | 0.000440343 | -0.312475239 | -0.167839099 | RP11-196E1.3            |
| chr3  | 152215049 | 152215571 | 523  | * | 2 | 9.37843E-24 | 0.007369812 | 0.000176848 | 0.000591334 | -0.410793017 | -0.220488342 |                         |
| chr11 | 35366721  | 35367036  | 316  | * | 2 | 1.085E-19   | 0.017860411 | 0.000176853 | 0.000731874 | -0.272453358 | -0.144037724 | SLC1A2                  |
| chr4  | 22509445  | 22510091  | 647  | * | 2 | 3.03976E-22 | 0.019533321 | 0.000176853 | 0.000744506 | -0.267135985 | -0.123982362 | GPR125                  |
| chr10 | 14596405  | 14597004  | 600  | * | 2 | 6.40421E-26 | 0.069277028 | 0.000176856 | 0.000873331 | -0.200889064 | -0.102956238 | FAM107B                 |
| chr14 | 23348291  | 23348949  | 659  | * | 2 | 3.0941E-24  | 0.081900169 | 0.000176857 | 0.000882841 | -0.242785952 | -0.120508079 | LRP10                   |

|       |           |           |     |   |   |             |             |             |             |              |              |                 |
|-------|-----------|-----------|-----|---|---|-------------|-------------|-------------|-------------|--------------|--------------|-----------------|
| chr4  | 3228567   | 3228890   | 324 | * | 2 | 1.50756E-20 | 0.031325301 | 0.000179522 | 0.000814383 | -0.321148114 | -0.157477297 | HTT             |
| chr4  | 40211657  | 40212592  | 936 | * | 2 | 4.89927E-22 | 6.95799E-07 | 0.000179561 | 1.62475E-06 | -0.372951424 | -0.298550646 | RHOH            |
| chr12 | 109234959 | 109235071 | 113 | * | 3 | 3.39148E-34 | 4.39595E-08 | 0.000181033 | 1.02236E-07 | -0.377111228 | -0.239789341 | SSH1            |
| chr18 | 74113813  | 74114728  | 916 | * | 4 | 7.43561E-47 | 5.53218E-07 | 0.000182451 | 9.23926E-09 | -0.396755229 | -0.260231017 | ZNF516          |
| chr16 | 85815505  | 85815851  | 347 | * | 3 | 6.8023E-40  | 3.75624E-10 | 0.000182851 | 2.43385E-09 | -0.380396562 | -0.304213004 | EMC8, RNU1-103P |
| chr19 | 4991580   | 4991633   | 54  | * | 2 | 2.1054E-27  | 2.62114E-07 | 0.000185751 | 6.79383E-07 | -0.411203547 | -0.383610722 | KDM4B           |
| chr19 | 40650939  | 40651007  | 69  | * | 2 | 2.54107E-19 | 0.000218075 | 0.000186721 | 0.000126045 | 0.262754266  | 0.17598811   |                 |
| chr21 | 39649500  | 39649958  | 459 | * | 3 | 2.09953E-35 | 2.66998E-09 | 0.000187784 | 1.4359E-08  | -0.31713365  | -0.258652553 | KCNJ15          |
| chr3  | 72987896  | 72988159  | 264 | * | 2 | 4.56246E-19 | 0.002819375 | 0.000187865 | 0.00044779  | -0.271198192 | -0.146360325 | GXYLT2          |
| chr11 | 124405865 | 124406358 | 494 | * | 2 | 8.87238E-21 | 0.004082993 | 0.00018787  | 0.000512883 | -0.363819847 | -0.194060111 |                 |
| chr9  | 91919480  | 91919723  | 244 | * | 2 | 1.26296E-18 | 0.00732296  | 0.000187877 | 0.000618234 | -0.290490711 | -0.137535384 |                 |
| chr5  | 7803175   | 7803274   | 100 | * | 2 | 7.05451E-26 | 3.31486E-07 | 0.000189791 | 8.43516E-07 | -0.324757028 | -0.272284946 | ADCY2           |
| chr17 | 14219881  | 14219963  | 83  | * | 2 | 2.85056E-25 | 4.6391E-07  | 0.000191035 | 1.14354E-06 | -0.285038038 | -0.24379659  | HS3ST3B1        |
| chr4  | 146685656 | 146686236 | 581 | * | 2 | 1.06892E-22 | 7.25633E-05 | 0.000191406 | 6.3697E-05  | -0.282783048 | -0.104389624 | C4orf51, ZNF827 |
| chr14 | 31560390  | 31560529  | 140 | * | 2 | 1.0221E-22  | 2.9448E-06  | 0.00019292  | 5.68377E-06 | -0.230300475 | -0.175087684 | AP4S1           |
| chr18 | 21596915  | 21597505  | 591 | * | 3 | 4.48916E-24 | 0.001391918 | 0.000197802 | 0.000361894 | -0.199749631 | -0.046107115 | TTC39C          |
| chr15 | 93790914  | 93791068  | 155 | * | 2 | 2.27546E-25 | 4.2168E-07  | 0.000198014 | 1.05464E-06 | -0.354147553 | -0.340020287 |                 |
| chr6  | 151701556 | 151701920 | 365 | * | 2 | 9.12738E-20 | 0.000828766 | 0.000198116 | 0.000270178 | 0.275030418  | 0.120173008  | ZBTB2           |
| chr9  | 133473444 | 133473888 | 445 | * | 2 | 1.7907E-21  | 0.007159872 | 0.000198168 | 0.000639637 | -0.314386425 | -0.163765513 | FUBP3           |
| chr6  | 91113506  | 91113687  | 182 | * | 2 | 3.21501E-24 | 1.07896E-06 | 0.000199801 | 2.43225E-06 | -0.376559989 | -0.267696616 |                 |
| chr10 | 80697460  | 80698358  | 899 | * | 2 | 9.61834E-21 | 2.73301E-05 | 0.000203557 | 3.30303E-05 | -0.149275514 | -0.029868829 |                 |
| chr14 | 21359737  | 21359943  | 207 | * | 2 | 8.51919E-25 | 5.51024E-07 | 0.000205775 | 1.34878E-06 | -0.322760614 | -0.273267103 | RNASE3          |
| chr12 | 114298934 | 114299076 | 143 | * | 2 | 8.24052E-26 | 3.08509E-07 | 0.000206163 | 7.98232E-07 | -0.385479862 | -0.379126298 | RBM19           |
| chr17 | 3738423   | 3738968   | 546 | * | 2 | 7.85924E-24 | 3.06569E-07 | 0.000207836 | 7.94407E-07 | -0.336059761 | -0.330517594 | C17orf85        |
| chr4  | 57594308  | 57594984  | 677 | * | 3 | 1.01411E-26 | 0.000144875 | 0.00020795  | 5.96117E-05 | -0.213080775 | -0.101355351 |                 |
| chr17 | 80346039  | 80346912  | 874 | * | 4 | 2.58438E-33 | 0.032037138 | 0.000209882 | 3.52342E-05 | -0.281603536 | -0.105012497 |                 |
| chr9  | 126959556 | 126960331 | 776 | * | 2 | 2.00008E-21 | 3.15041E-05 | 0.000210417 | 3.708E-05   | 0.22367885   | 0.158884317  |                 |
| chr1  | 40425741  | 40426487  | 747 | * | 2 | 3.15209E-24 | 8.30389E-07 | 0.00021263  | 1.95316E-06 | -0.242775058 | -0.193393029 | MFSD2A          |
| chr2  | 149823115 | 149823755 | 641 | * | 2 | 2.58983E-20 | 0.089457391 | 0.000214149 | 0.001050875 | -0.3375026   | -0.16956081  | KIF5C           |

|       |           |           |      |   |   |             |             |             |             |              |              |                        |
|-------|-----------|-----------|------|---|---|-------------|-------------|-------------|-------------|--------------|--------------|------------------------|
| chr9  | 36169175  | 36169949  | 775  | * | 3 | 2.28182E-29 | 0.021810948 | 0.000216453 | 0.00094645  | -0.383495949 | -0.098601173 | CCIN                   |
| chr3  | 38029323  | 38030079  | 757  | * | 5 | 5.37795E-56 | 1.11678E-13 | 0.000218573 | 2.16429E-12 | -0.395496463 | -0.278889674 | VILL                   |
| chr1  | 229114792 | 229115634 | 843  | * | 3 | 5.23856E-23 | 0.031835064 | 0.000218958 | 0.000967261 | -0.238721607 | -0.085887884 |                        |
| chr9  | 764094    | 764329    | 236  | * | 2 | 1.30225E-17 | 0.004997411 | 0.000219826 | 0.000616447 | -0.190713015 | -0.116015097 |                        |
| chr7  | 36097189  | 36097877  | 689  | * | 2 | 3.29476E-20 | 0.018516599 | 0.000219841 | 0.000880597 | 0.276575554  | 0.146375166  |                        |
| chr3  | 40271029  | 40271748  | 720  | * | 2 | 2.665E-22   | 5.68392E-07 | 0.000221886 | 1.40192E-06 | -0.274423844 | -0.069291529 | MYRIP                  |
| chr12 | 78392336  | 78392948  | 613  | * | 2 | 2.51999E-21 | 0.000133124 | 0.000222592 | 0.000101508 | -0.298328928 | -0.174266181 | NAV3                   |
| chr21 | 40124792  | 40125580  | 789  | * | 3 | 6.29096E-28 | 0.040470137 | 0.000225693 | 0.002055468 | -0.284692596 | -0.091290642 |                        |
| chr10 | 75335352  | 75336540  | 1189 | * | 4 | 6.24411E-25 | 0.070708911 | 0.000226114 | 0.003015011 | -0.300454758 | -0.095725242 | USP54                  |
| chr12 | 26676779  | 26676849  | 71   | * | 2 | 3.79115E-25 | 3.54937E-07 | 0.000226428 | 9.17398E-07 | -0.378121259 | -0.347646594 | ITPR2                  |
| chr2  | 208461657 | 208461998 | 342  | * | 2 | 5.42681E-26 | 7.58424E-07 | 0.000227308 | 1.82122E-06 | -0.297922054 | -0.297529269 | CREB1, METTL21A        |
| chr13 | 29279713  | 29280140  | 428  | * | 2 | 2.62587E-19 | 0.000812268 | 0.000229513 | 0.000292419 | -0.309328606 | -0.179009433 | SLC46A3                |
| chr2  | 43635340  | 43635730  | 391  | * | 2 | 1.30425E-20 | 0.00084008  | 0.000229516 | 0.00029745  | -0.346279127 | -0.212377129 | RNU6-958P, THADA       |
| chr5  | 174938424 | 174939135 | 712  | * | 2 | 6.56065E-20 | 0.029457489 | 0.000229602 | 0.00099292  | -0.411819767 | -0.201808715 | SFXN1                  |
| chr16 | 27873237  | 27874129  | 893  | * | 3 | 1.76517E-22 | 0.023481134 | 0.000230143 | 0.00168076  | -0.435596612 | -0.133636991 | GSG1L                  |
| chr15 | 94642624  | 94643799  | 1176 | * | 5 | 5.28475E-39 | 0.011130944 | 0.000230604 | 3.91562E-05 | -0.394445769 | -0.160525065 | CTD-2643K12.3          |
| chr20 | 48385019  | 48385709  | 691  | * | 2 | 2.42419E-22 | 6.34775E-07 | 0.000233098 | 1.55901E-06 | -0.216319379 | -0.20738829  |                        |
| chr11 | 65141519  | 65142032  | 514  | * | 2 | 2.01667E-19 | 0.003678066 | 0.00023776  | 0.00058454  | -0.367683861 | -0.174320889 | RP11-867O8.5           |
| chr13 | 50796845  | 50797125  | 281  | * | 2 | 4.17495E-24 | 7.11348E-07 | 0.00023831  | 1.73213E-06 | -0.381751674 | -0.33587134  | DLEU1                  |
| chr8  | 130898833 | 130899478 | 646  | * | 2 | 1.28267E-19 | 0.003571223 | 0.000239486 | 0.000581041 | 0.286147692  | 0.149839862  | FAM49B                 |
| chr4  | 54367835  | 54367958  | 124  | * | 2 | 2.81098E-25 | 6.81935E-07 | 0.000240253 | 1.66977E-06 | -0.3025525   | -0.243615305 | FIP1L1, LNX1-AS1, LNX1 |
| chr11 | 44612458  | 44614255  | 1798 | * | 4 | 3.93406E-37 | 5.84636E-12 | 0.000243447 | 7.60611E-11 | -0.469309486 | -0.29051129  | CD82                   |
| chr6  | 139656042 | 139656762 | 721  | * | 2 | 1.23307E-21 | 8.65331E-07 | 0.000244827 | 2.07165E-06 | -0.280961721 | -0.262972263 |                        |
| chr14 | 78031892  | 78032088  | 197  | * | 2 | 1.30174E-23 | 4.50564E-07 | 0.000245233 | 1.15133E-06 | -0.401993461 | -0.370054459 | SPTLC2                 |
| chr14 | 101587161 | 101587855 | 695  | * | 2 | 2.16733E-21 | 0.041716377 | 0.000248082 | 0.001114162 | -0.12006463  | -0.061076353 | RP11-8L8.2             |
| chr3  | 59032572  | 59033261  | 690  | * | 2 | 6.5808E-22  | 0.009519473 | 0.000248354 | 0.000825212 | -0.286199513 | -0.145523228 | C3orf67                |
| chr2  | 239343317 | 239343799 | 483  | * | 2 | 1.72572E-24 | 0.026134259 | 0.000249759 | 0.001043937 | -0.302751064 | -0.155447139 | ASB1                   |
| chr6  | 143718452 | 143719125 | 674  | * | 3 | 1.18092E-21 | 0.237408712 | 0.000254253 | 0.003649954 | -0.38550817  | -0.128717754 |                        |
| chr17 | 56359527  | 56359578  | 52   | * | 2 | 1.40827E-25 | 1.20659E-06 | 0.000254785 | 2.79893E-06 | -0.186639395 | -0.173687018 |                        |

|       |           |           |      |   |   |             |             |             |             |              |              |                   |
|-------|-----------|-----------|------|---|---|-------------|-------------|-------------|-------------|--------------|--------------|-------------------|
| chr17 | 28671936  | 28672726  | 791  | * | 3 | 3.6439E-30  | 2.7343E-05  | 0.000255341 | 2.97991E-06 | -0.262892452 | -0.147297311 |                   |
| chr2  | 43241407  | 43241873  | 467  | * | 2 | 5.01034E-23 | 7.43358E-07 | 0.000255366 | 1.81993E-06 | -0.391577691 | -0.362957653 |                   |
| chr14 | 92939857  | 92940131  | 275  | * | 2 | 6.23958E-22 | 2.47469E-06 | 0.000255974 | 5.22769E-06 | -0.279219909 | -0.217682159 | SLC24A4           |
| chr2  | 174023580 | 174024669 | 1090 | * | 3 | 2.20039E-30 | 2.34321E-06 | 0.000262771 | 4.99705E-06 | -0.294585477 | -0.171822903 | MLTK              |
| chr4  | 40239725  | 40240766  | 1042 | * | 3 | 1.36858E-26 | 0.000498414 | 0.00026299  | 5.23785E-06 | -0.36736085  | -0.173574435 | RHOH              |
| chr8  | 96240914  | 96241358  | 445  | * | 2 | 5.03491E-18 | 0.004157492 | 0.00026447  | 0.000659672 | 0.206914922  | 0.122863806  | KB-1047C11.2      |
| chr2  | 62515892  | 62515978  | 87   | * | 2 | 1.29668E-15 | 0.010255735 | 0.000264491 | 0.000884359 | 0.216106289  | 0.104190163  |                   |
| chr1  | 33246019  | 33246431  | 413  | * | 2 | 3.97511E-19 | 0.053951604 | 0.000264507 | 0.001213009 | -0.239005374 | -0.120245938 | YARS              |
| chr16 | 48532923  | 48533930  | 1008 | * | 3 | 5.24062E-21 | 0.005977225 | 0.000265044 | 0.000558262 | -0.235271058 | -0.087785181 |                   |
| chr2  | 36741839  | 36742484  | 646  | * | 2 | 3.82498E-20 | 0.056624016 | 0.000267748 | 0.001232007 | -0.30326349  | -0.152782601 | CRIM1             |
| chr19 | 41782099  | 41782183  | 85   | * | 3 | 2.31299E-28 | 2.34486E-07 | 0.000267906 | 4.08825E-07 | -0.382432383 | -0.249757063 | HNRNPUL1          |
| chr2  | 25873029  | 25873395  | 367  | * | 3 | 5.56496E-35 | 1.42838E-09 | 0.000268525 | 8.67002E-09 | -0.379144103 | -0.319726863 | DTNB              |
| chr3  | 189111648 | 189111683 | 36   | * | 2 | 2.56024E-17 | 0.000362947 | 0.000268597 | 0.00020598  | -0.232571818 | -0.139965701 |                   |
| chr1  | 6553227   | 6553510   | 284  | * | 2 | 5.63483E-19 | 0.000943146 | 0.00026872  | 0.000346791 | 0.214713901  | 0.129304495  | PLEKHG5           |
| chr19 | 52715638  | 52715929  | 292  | * | 2 | 1.8839E-16  | 0.084951795 | 0.000268842 | 0.001279631 | -0.379271242 | -0.18815328  | PPP2R1A           |
| chr1  | 23911837  | 23912230  | 394  | * | 3 | 4.13083E-20 | 0.03768048  | 0.000269212 | 0.001774285 | -0.316841652 | -0.088485508 | MDS2              |
| chr1  | 8278295   | 8278817   | 523  | * | 2 | 1.0808E-19  | 0.031978692 | 0.000272672 | 0.001161578 | -0.344811688 | -0.175406863 | RP11-431K24.4     |
| chr8  | 8231531   | 8232204   | 674  | * | 2 | 1.2869E-18  | 0.007979523 | 0.000272764 | 0.000841358 | -0.25912521  | -0.133434887 | SGK223            |
| chr17 | 25858091  | 25860000  | 1910 | * | 5 | 8.17894E-41 | 1.82581E-13 | 0.000278897 | 4.62973E-12 | -0.323409185 | -0.214759571 | KSR1              |
| chr1  | 206922233 | 206922738 | 506  | * | 3 | 3.17347E-23 | 0.000484069 | 0.000279077 | 6.83599E-05 | -0.337920304 | -0.153274277 |                   |
| chr20 | 30700869  | 30701083  | 215  | * | 2 | 3.57776E-24 | 5.45479E-07 | 0.000281292 | 1.39342E-06 | -0.289805914 | -0.289684546 | TM9SF4            |
| chr1  | 230289718 | 230290089 | 372  | * | 3 | 1.2787E-31  | 6.25469E-09 | 0.000281859 | 3.14857E-08 | -0.351802466 | -0.322578577 | GALNT2            |
| chr15 | 101973616 | 101974405 | 790  | * | 2 | 1.70351E-20 | 0.000438158 | 0.000284405 | 0.000236783 | -0.33910567  | -0.179703721 | PCSK6             |
| chr16 | 88686083  | 88686428  | 346  | * | 2 | 4.25702E-18 | 0.000146952 | 0.000284988 | 0.000121476 | -0.375034734 | -0.169165893 | ZC3H18            |
| chr1  | 175136705 | 175137236 | 532  | * | 2 | 3.55352E-19 | 0.018242606 | 0.000285265 | 0.001083554 | -0.267357994 | -0.12671386  | KIAA0040          |
| chr9  | 134127575 | 134128240 | 666  | * | 2 | 9.18833E-19 | 0.000598056 | 0.000285349 | 0.000282385 | -0.304439762 | -0.164483307 |                   |
| chr11 | 117406287 | 117406767 | 481  | * | 2 | 1.48658E-17 | 0.010431582 | 0.000285525 | 0.000942379 | -0.196902696 | -0.084042991 | DSCAML1           |
| chr12 | 48294379  | 48295148  | 770  | * | 2 | 6.64824E-20 | 4.3557E-06  | 0.000286117 | 8.64613E-06 | -0.424616597 | -0.327570263 | RP11-89H19.1, VDR |
| chr8  | 103780068 | 103780382 | 315  | * | 2 | 1.84672E-16 | 0.003800996 | 0.000286563 | 0.0006747   | -0.112985819 | -0.034965742 |                   |

|       |           |           |      |   |   |             |             |             |             |              |              |                            |
|-------|-----------|-----------|------|---|---|-------------|-------------|-------------|-------------|--------------|--------------|----------------------------|
| chr16 | 81582954  | 81583089  | 136  | * | 2 | 2.33505E-18 | 2.26019E-05 | 0.000286654 | 3.23705E-05 | -0.304250015 | -0.191798251 | CMIP                       |
| chr9  | 93959671  | 93960152  | 482  | * | 3 | 2.68491E-31 | 3.25486E-09 | 0.000287718 | 1.81077E-08 | -0.367774238 | -0.205850338 |                            |
| chr6  | 14733316  | 14733832  | 517  | * | 2 | 1.64767E-17 | 0.015992896 | 0.000289185 | 0.001062971 | 0.2370054    | 0.123759334  |                            |
| chr10 | 114781270 | 114781546 | 277  | * | 2 | 9.41099E-17 | 0.033667857 | 0.000289194 | 0.001230101 | -0.354562251 | -0.17922929  | TCF7L2                     |
| chr1  | 116519323 | 116520317 | 995  | * | 4 | 9.38947E-35 | 0.000759444 | 0.000289242 | 9.94536E-05 | -0.340365346 | -0.093095756 | SLC22A15                   |
| chr6  | 12001569  | 12002135  | 567  | * | 3 | 1.99773E-28 | 2.11844E-05 | 0.000289953 | 3.45334E-06 | -0.366449082 | -0.235990287 |                            |
| chr12 | 64646546  | 64646917  | 372  | * | 3 | 2.25828E-24 | 4.81299E-06 | 0.000292251 | 7.35934E-06 | -0.360906437 | -0.200055745 | RPS11P6                    |
| chr21 | 36616969  | 36616995  | 27   | * | 2 | 2.8929E-21  | 1.26853E-06 | 0.000293144 | 2.99325E-06 | -0.34244936  | -0.34038309  | RUNX1                      |
| chr7  | 151503515 | 151503608 | 94   | * | 4 | 8.69679E-40 | 1.6949E-10  | 0.000294812 | 1.36611E-09 | -0.250391474 | -0.187028612 | PRKAG2                     |
| chr7  | 47560215  | 47560370  | 156  | * | 2 | 1.75507E-20 | 2.77288E-06 | 0.000295117 | 5.93208E-06 | -0.320195281 | -0.256617852 | TNS3                       |
| chr5  | 95260542  | 95260620  | 79   | * | 2 | 1.00634E-15 | 0.000865641 | 0.000296351 | 0.000351708 | -0.318791682 | -0.179175764 | ELL2                       |
| chr13 | 41718870  | 41719542  | 673  | * | 2 | 6.41083E-18 | 0.014344999 | 0.000296499 | 0.001055921 | -0.359979045 | -0.195521812 |                            |
| chr14 | 91827651  | 91828035  | 385  | * | 2 | 6.62263E-22 | 7.93977E-07 | 0.000297036 | 1.97206E-06 | -0.372273992 | -0.329796011 | CCDC88C                    |
| chr15 | 25650611  | 25651282  | 672  | * | 3 | 1.81747E-20 | 0.198369267 | 0.000297228 | 0.003793042 | -0.324022109 | -0.110827561 | SNHG14, UBE3A              |
| chr18 | 51882163  | 51882189  | 27   | * | 2 | 1.83314E-20 | 0.000159236 | 0.000297267 | 0.000130498 | -0.301809953 | -0.223136998 | STARD6                     |
| chr8  | 19535747  | 19536244  | 498  | * | 3 | 9.05861E-21 | 0.119721927 | 0.000299648 | 0.003575788 | -0.381625926 | -0.132817116 | RP11-1105O14.1, CSGALNACT1 |
| chr1  | 233004866 | 233005032 | 167  | * | 2 | 2.37201E-15 | 0.003246623 | 0.000300001 | 0.000654425 | -0.313910649 | -0.162775402 |                            |
| chr10 | 129794994 | 129795003 | 10   | * | 2 | 1.0674E-22  | 8.08267E-07 | 0.000300152 | 2.00689E-06 | -0.316207044 | -0.258950954 | PTPRE                      |
| chr8  | 6794872   | 6796618   | 1747 | * | 8 | 9.80516E-66 | 5.76016E-18 | 0.00030472  | 3.64182E-16 | -0.395533074 | -0.224844054 | DEFA4                      |
| chr22 | 39792498  | 39792959  | 462  | * | 2 | 3.06129E-21 | 1.34914E-06 | 0.000306138 | 3.18315E-06 | 0.168118959  | 0.135164724  |                            |
| chr14 | 91111400  | 91112135  | 736  | * | 3 | 2.46505E-25 | 0.001678773 | 0.000306589 | 0.000471674 | -0.289134468 | -0.128137736 | RP11-1078H9.5, TTC7B       |
| chr20 | 22665210  | 22666782  | 1573 | * | 7 | 3.63019E-58 | 3.99996E-06 | 0.000311115 | 1.88078E-09 | -0.284249079 | -0.149230837 | RP11-359G22.2              |
| chr1  | 167732969 | 167733310 | 342  | * | 2 | 6.44739E-17 | 0.028505387 | 0.000312118 | 0.00127454  | -0.3108103   | -0.159644116 | MPZL1                      |
| chr19 | 17219073  | 17219214  | 142  | * | 2 | 1.63176E-21 | 2.12713E-06 | 0.000312169 | 4.76659E-06 | -0.305744436 | -0.282934954 | MYO9B                      |
| chr8  | 37661612  | 37662390  | 779  | * | 2 | 3.64499E-18 | 0.000159079 | 0.000313832 | 0.000133727 | -0.334468103 | -0.12558928  | GPR124                     |
| chr1  | 224957573 | 224958213 | 641  | * | 2 | 1.34334E-17 | 0.005830837 | 0.000314458 | 0.000843165 | -0.163084528 | -0.087374494 | RP11-449J1.1               |
| chr15 | 75079350  | 75080115  | 766  | * | 2 | 4.51546E-19 | 0.010432682 | 0.000314476 | 0.001014645 | 0.24243485   | 0.117557496  | CSK                        |
| chr12 | 89777963  | 89778485  | 523  | * | 2 | 1.25579E-20 | 3.2309E-06  | 0.000315966 | 6.85703E-06 | -0.242090191 | -0.240125254 |                            |
| chr6  | 28874479  | 28875354  | 876  | * | 5 | 7.02426E-51 | 5.29663E-12 | 0.000316234 | 8.05814E-11 | -0.309892594 | -0.241153573 | TRIM27                     |

|       |           |           |      |   |   |             |             |             |             |              |              |                                    |
|-------|-----------|-----------|------|---|---|-------------|-------------|-------------|-------------|--------------|--------------|------------------------------------|
| chr8  | 142389397 | 142391497 | 2101 | * | 5 | 6.622E-29   | 0.020282391 | 0.000316993 | 3.62625E-05 | -0.300134517 | -0.095704143 |                                    |
| chr14 | 89925446  | 89925468  | 23   | * | 2 | 1.90489E-21 | 7.24213E-07 | 0.000316997 | 1.82999E-06 | -0.255222107 | -0.251582165 | FOXN3, RP11-33N16.3                |
| chr19 | 5983451   | 5983811   | 361  | * | 2 | 3.14279E-18 | 4.57435E-05 | 0.000317455 | 5.67587E-05 | -0.101388224 | -0.089322299 | CTC-232P5.1                        |
| chr16 | 84860766  | 84860918  | 153  | * | 3 | 1.03786E-29 | 7.49192E-06 | 0.000318921 | 2.70306E-06 | -0.482204603 | -0.312630705 | CRISPLD2                           |
| chr11 | 34393106  | 34393828  | 723  | * | 3 | 3.47028E-21 | 7.41508E-06 | 0.000320178 | 2.9164E-06  | -0.391313008 | -0.208360826 |                                    |
| chr18 | 2857042   | 2857947   | 906  | * | 2 | 2.27135E-17 | 1.54219E-06 | 0.000321135 | 3.61102E-06 | -0.323748033 | -0.213790217 | EMILIN2                            |
| chr5  | 177913434 | 177913485 | 52   | * | 3 | 1.147E-30   | 3.20071E-09 | 0.000321715 | 1.85062E-08 | -0.470589063 | -0.326534205 | COL23A1                            |
| chr22 | 24536471  | 24536572  | 102  | * | 2 | 1.69143E-18 | 1.05948E-05 | 0.000322221 | 1.85136E-05 | -0.08724934  | -0.085972716 | CABIN1                             |
| chr17 | 27264093  | 27264560  | 468  | * | 2 | 8.93159E-18 | 0.004211029 | 0.000322235 | 0.000761607 | -0.415666576 | -0.22391414  | RP11-20B24.5, PHF12                |
| chr12 | 8043600   | 8044199   | 600  | * | 4 | 7.17468E-28 | 0.00636446  | 0.000322362 | 2.28075E-05 | -0.330145487 | -0.124197749 | SLC2A14                            |
| chr5  | 17436371  | 17436741  | 371  | * | 6 | 2.4995E-41  | 1.97288E-06 | 0.000322425 | 4.20894E-08 | -0.37448417  | -0.164606015 | RP11-321E2.3                       |
| chr22 | 23153695  | 23154645  | 951  | * | 4 | 2.58916E-37 | 2.5244E-10  | 0.000322431 | 1.70149E-09 | -0.327851123 | -0.22280292  | IGLV3-10                           |
| chr12 | 93344946  | 93345531  | 586  | * | 2 | 2.4246E-17  | 0.00642954  | 0.000324031 | 0.000891202 | -0.261297387 | -0.136145996 |                                    |
| chr12 | 10336861  | 10337070  | 210  | * | 2 | 1.62803E-19 | 4.49837E-06 | 0.000324168 | 9.13661E-06 | -0.341302309 | -0.271706116 | TMEM52B                            |
| chr11 | 121330348 | 121330401 | 54   | * | 3 | 1.76634E-31 | 3.46192E-09 | 0.000326225 | 1.9945E-08  | -0.333786199 | -0.271444581 | SORL1                              |
| chr2  | 111790599 | 111791007 | 409  | * | 2 | 3.53807E-18 | 5.86809E-05 | 0.000327393 | 6.87608E-05 | -0.273882289 | -0.100127605 | ACOXL                              |
| chr12 | 64960957  | 64961489  | 533  | * | 2 | 1.6019E-20  | 1.45011E-06 | 0.000328688 | 3.43188E-06 | -0.275620337 | -0.038287379 |                                    |
| chr1  | 116560364 | 116560807 | 444  | * | 2 | 5.91992E-18 | 0.007018032 | 0.000328991 | 0.000928094 | -0.3541622   | -0.195116955 | SLC22A15                           |
| chr20 | 33723949  | 33724170  | 222  | * | 2 | 9.07224E-15 | 0.011500501 | 0.000329317 | 0.001080512 | -0.255525266 | -0.132322912 | EDEM2                              |
| chr9  | 93822926  | 93823465  | 540  | * | 2 | 8.85823E-17 | 0.014589929 | 0.000330073 | 0.001153479 | -0.236798929 | -0.111181405 |                                    |
| chr11 | 117873636 | 117874181 | 546  | * | 2 | 1.56917E-17 | 0.000482563 | 0.000331223 | 0.00027169  | -0.253511638 | -0.104840535 |                                    |
| chr3  | 171282985 | 171283606 | 622  | * | 2 | 2.27152E-19 | 0.002353735 | 0.000331453 | 0.000610646 | -0.252679272 | -0.109049209 |                                    |
| chr11 | 69150514  | 69152387  | 1874 | * | 5 | 4.0187E-33  | 3.13723E-08 | 0.000331519 | 1.61061E-08 | 0.20061598   | 0.138763515  | MYEOV                              |
| chr16 | 30953496  | 30953591  | 96   | * | 2 | 3.048E-14   | 0.009969179 | 0.000331525 | 0.001042254 | 0.064451651  | 0.033592246  | FBXL19                             |
| chr14 | 78488583  | 78488668  | 86   | * | 2 | 3.74615E-14 | 0.011877073 | 0.000331924 | 0.001096869 | -0.32420702  | -0.149647262 |                                    |
| chr2  | 233981788 | 233981885 | 98   | * | 2 | 1.67528E-20 | 1.65182E-06 | 0.000332318 | 3.85848E-06 | -0.32778667  | -0.318852438 | INPP5D                             |
| chr17 | 6830903   | 6831506   | 604  | * | 2 | 7.7932E-17  | 0.056935107 | 0.00033488  | 0.001494201 | -0.263126713 | -0.130985299 | ALOX12P2, AC027763.2, RP11-530N7.2 |
| chr18 | 51787171  | 51787310  | 140  | * | 2 | 2.00008E-21 | 1.06009E-06 | 0.000335076 | 2.60121E-06 | -0.252340296 | -0.244226508 |                                    |
| chr10 | 28700186  | 28700847  | 662  | * | 2 | 5.16176E-17 | 0.015020326 | 0.000335758 | 0.001177638 | -0.253284754 | -0.130754553 |                                    |

|       |           |           |      |   |   |             |             |             |             |              |              |                                    |
|-------|-----------|-----------|------|---|---|-------------|-------------|-------------|-------------|--------------|--------------|------------------------------------|
| chr18 | 9494893   | 9495499   | 607  | * | 2 | 1.72101E-17 | 0.000638427 | 0.000336624 | 0.000321116 | -0.23608192  | -0.168665796 | RALBP1                             |
| chr14 | 93652505  | 93652954  | 450  | * | 2 | 4.71015E-18 | 0.08250378  | 0.000337508 | 0.001557779 | -0.243411675 | -0.118851118 | TMEM251, RP11-371E8.4              |
| chr10 | 11879646  | 11880373  | 728  | * | 2 | 6.15352E-18 | 6.14993E-05 | 0.000338101 | 7.20026E-05 | -0.323537888 | -0.125085324 | PROSER2                            |
| chr6  | 14596742  | 14596806  | 65   | * | 2 | 8.02194E-22 | 1.16933E-06 | 0.000338734 | 2.84501E-06 | -0.337260915 | -0.219786769 |                                    |
| chr1  | 147101752 | 147101904 | 153  | * | 2 | 3.59718E-16 | 0.000111952 | 0.000338748 | 0.000109494 | -0.417957391 | -0.246445852 | ACP6                               |
| chr1  | 32721065  | 32721190  | 126  | * | 2 | 7.50156E-22 | 8.21038E-07 | 0.000339099 | 2.06829E-06 | -0.375447378 | -0.306232488 | LCK                                |
| chr20 | 24899180  | 24899794  | 615  | * | 2 | 5.58618E-21 | 0.000720861 | 0.000339554 | 0.000344994 | -0.252166723 | -0.144267939 |                                    |
| chr15 | 39602982  | 39603094  | 113  | * | 2 | 4.01175E-15 | 0.000794578 | 0.000339573 | 0.000363705 | -0.250702309 | -0.105995629 | RP11-624L4.1, RP11-462P6.1         |
| chr3  | 52235276  | 52235959  | 684  | * | 2 | 3.19324E-17 | 0.00738876  | 0.000339774 | 0.000966644 | -0.255828159 | -0.144488962 | ALAS1                              |
| chr12 | 64299398  | 64299607  | 210  | * | 2 | 1.24749E-14 | 0.015834722 | 0.000339797 | 0.001204521 | -0.345954415 | -0.175593026 | SRGAP1                             |
| chr4  | 77198037  | 77198262  | 226  | * | 2 | 1.3048E-14  | 0.019741496 | 0.000339802 | 0.00126865  | -0.250592991 | -0.128493363 | FAM47E, FAM47E-STBD1, FAM47E-STBD1 |
| chr15 | 70632081  | 70632371  | 291  | * | 2 | 7.44025E-15 | 0.027233683 | 0.000339807 | 0.001355395 | -0.288701893 | -0.150455646 |                                    |
| chr9  | 132337542 | 132337640 | 99   | * | 2 | 5.22526E-14 | 0.05895429  | 0.000339816 | 0.00151886  | -0.278209384 | -0.141664813 |                                    |
| chr5  | 32390541  | 32391135  | 595  | * | 2 | 1.70684E-16 | 0.047623746 | 0.000340516 | 0.001483423 | -0.299727184 | -0.152755518 | ZFR                                |
| chr11 | 12216962  | 12217666  | 705  | * | 3 | 1.52849E-23 | 9.66491E-05 | 0.000340944 | 5.07373E-05 | 0.2139141    | 0.09965271   | MICAL2                             |
| chr13 | 50858812  | 50859451  | 640  | * | 2 | 1.61701E-19 | 1.27531E-05 | 0.000341719 | 2.18419E-05 | -0.338220162 | -0.268990363 | DLEU1                              |
| chr17 | 79128827  | 79129078  | 252  | * | 5 | 1.50987E-43 | 6.9778E-11  | 0.000342324 | 1.96787E-10 | -0.359941429 | -0.268532014 | AATK                               |
| chr13 | 99094983  | 99096365  | 1383 | * | 4 | 3.51216E-32 | 0.051116592 | 0.000342413 | 0.003751951 | -0.407094859 | -0.113623094 | FARP1                              |
| chr12 | 121677269 | 121677522 | 254  | * | 2 | 1.49741E-15 | 0.22253978  | 0.000343359 | 0.001651135 | -0.289417538 | -0.146419921 | CAMKK2                             |
| chr3  | 52879316  | 52879742  | 427  | * | 2 | 1.11334E-16 | 0.000549453 | 0.000343844 | 0.00029861  | -0.357387348 | -0.211762528 | TMEM110-MUSTN1, TMEM110            |
| chr22 | 50586299  | 50586605  | 307  | * | 2 | 6.45932E-31 | 9.50185E-07 | 0.000344432 | 2.36562E-06 | -0.424164072 | -0.33407678  | MOV10L1                            |
| chr6  | 24686728  | 24687380  | 653  | * | 3 | 1.33902E-25 | 5.14785E-05 | 0.000344996 | 9.02247E-06 | -0.368558033 | -0.195890046 | ACOT13                             |
| chr5  | 73938574  | 73939283  | 710  | * | 2 | 3.80661E-24 | 9.4316E-07  | 0.000346228 | 2.35142E-06 | -0.312072023 | -0.278821623 | HEXB                               |
| chr7  | 36022276  | 36022841  | 566  | * | 4 | 1.19725E-23 | 0.000910024 | 0.000346712 | 0.000120058 | -0.369134058 | -0.154340543 |                                    |
| chr13 | 25079332  | 25080267  | 936  | * | 3 | 6.55584E-21 | 0.042486359 | 0.000347464 | 0.000919443 | -0.234702109 | -0.098145685 | TPTE2P6, PARP4                     |
| chr10 | 31146954  | 31147843  | 890  | * | 3 | 2.33632E-26 | 0.000157678 | 0.000348315 | 6.86982E-06 | -0.359058873 | -0.212654948 | ZNF438                             |
| chr8  | 121094884 | 121095224 | 341  | * | 2 | 6.42822E-15 | 0.027579582 | 0.000348486 | 0.001386968 | -0.189918838 | -0.099043532 | COL14A1                            |
| chr1  | 43000462  | 43001072  | 611  | * | 2 | 9.95823E-17 | 0.005096282 | 0.000349365 | 0.000866118 | -0.341021156 | -0.191867316 | CCDC30                             |
| chr9  | 133574171 | 133575011 | 841  | * | 3 | 1.81716E-24 | 4.9676E-06  | 0.000350609 | 2.8035E-06  | 0.239605508  | 0.138262191  | EXOSC2                             |



|       |           |           |      |   |   |             |             |             |             |              |              |              |
|-------|-----------|-----------|------|---|---|-------------|-------------|-------------|-------------|--------------|--------------|--------------|
| chr13 | 95133236  | 95133339  | 104  | * | 2 | 9.30533E-21 | 1.25747E-05 | 0.000351132 | 2.17603E-05 | -0.302476726 | -0.206113966 |              |
| chr14 | 103870751 | 103871452 | 702  | * | 5 | 1.48111E-34 | 1.16736E-07 | 0.000352195 | 1.22923E-08 | -0.438988741 | -0.243889583 | MARK3        |
| chr7  | 77096927  | 77096967  | 41   | * | 2 | 8.55855E-22 | 1.32568E-06 | 0.000352827 | 3.2023E-06  | -0.328947635 | -0.306059089 |              |
| chr9  | 98619666  | 98619894  | 229  | * | 2 | 2.33945E-14 | 0.036657651 | 0.000352962 | 0.001472464 | -0.364614968 | -0.186460976 | LINC00476    |
| chr12 | 92453691  | 92453837  | 147  | * | 2 | 8.90093E-14 | 0.018606118 | 0.000355814 | 0.001298443 | -0.233344854 | -0.108237372 | C12orf79     |
| chr22 | 32347971  | 32348805  | 835  | * | 3 | 1.50023E-26 | 2.10433E-05 | 0.000356305 | 4.64669E-06 | -0.239382365 | -0.158185838 | YWHAH        |
| chr17 | 1372403   | 1372751   | 349  | * | 3 | 6.20195E-20 | 0.231393554 | 0.000356631 | 0.004555056 | -0.253255078 | -0.082786579 | MYO1C        |
| chr2  | 197583266 | 197583934 | 669  | * | 4 | 1.96077E-29 | 7.92429E-06 | 0.00035692  | 1.39008E-05 | -0.424847832 | -0.154617948 | CCDC150      |
| chr22 | 29107974  | 29108527  | 554  | * | 3 | 2.18474E-17 | 0.285822643 | 0.000357774 | 0.004004938 | -0.294760213 | -0.104828349 | CHEK2        |
| chr2  | 109883024 | 109883620 | 597  | * | 2 | 2.1987E-18  | 0.004140705 | 0.000357928 | 0.000813866 | -0.261402075 | -0.119452883 | SH3RF3       |
| chr8  | 37740548  | 37741280  | 733  | * | 2 | 5.99934E-20 | 7.65846E-06 | 0.000358053 | 1.45918E-05 | -0.218319704 | -0.074031991 | RAB11FIP1    |
| chr2  | 37416839  | 37416883  | 45   | * | 2 | 4.11751E-22 | 4.44442E-06 | 0.00035909  | 9.24495E-06 | -0.308516573 | -0.214581956 | SULT6B1      |
| chr4  | 89445475  | 89446409  | 935  | * | 3 | 5.19366E-29 | 8.22755E-07 | 0.000360628 | 1.18403E-06 | -0.372456438 | -0.258408004 | HERC3        |
| chr13 | 110324345 | 110324798 | 454  | * | 2 | 1.2073E-16  | 0.000331211 | 0.000361616 | 0.00022746  | -0.379750619 | -0.20605849  |              |
| chr7  | 75580813  | 75581161  | 349  | * | 2 | 2.01779E-15 | 0.002013571 | 0.000362022 | 0.000602373 | -0.373784211 | -0.219182226 | POR          |
| chr11 | 6222458   | 6222973   | 516  | * | 3 | 1.91765E-29 | 3.75959E-09 | 0.000363674 | 2.19478E-08 | -0.353977472 | -0.308495915 |              |
| chr7  | 98724624  | 98724797  | 174  | * | 2 | 1.69565E-14 | 0.001359374 | 0.000364103 | 0.000500568 | -0.207764607 | -0.139520879 | SMURF1       |
| chr19 | 15980239  | 15980980  | 742  | * | 3 | 7.05357E-25 | 0.000308843 | 0.000366577 | 1.38811E-05 | -0.307668679 | -0.205989424 |              |
| chr22 | 38685847  | 38686149  | 303  | * | 2 | 9.85838E-15 | 0.005560666 | 0.000367397 | 0.00092675  | -0.283767986 | -0.15683864  |              |
| chr1  | 235010536 | 235010674 | 139  | * | 2 | 6.79282E-17 | 3.57875E-05 | 0.000367692 | 4.98628E-05 | -0.201770303 | -0.054273023 |              |
| chr6  | 35569471  | 35570573  | 1103 | * | 3 | 1.24244E-23 | 1.2804E-06  | 0.000369869 | 2.5476E-06  | -0.325348548 | -0.140112426 | FKBP5        |
| chr19 | 8367077   | 8367151   | 75   | * | 2 | 1.46362E-14 | 0.006243326 | 0.000370727 | 0.000972309 | -0.281792428 | -0.159129294 | CD320        |
| chr4  | 140655478 | 140656096 | 619  | * | 2 | 3.10826E-18 | 0.009609555 | 0.000371581 | 0.001123144 | -0.316844309 | -0.157138229 | MGST2, MAML3 |
| chr15 | 71099856  | 71100339  | 484  | * | 2 | 1.08028E-15 | 0.005355529 | 0.000371705 | 0.000921638 | -0.242402187 | -0.125739623 |              |
| chr13 | 111007189 | 111007387 | 199  | * | 2 | 1.33701E-14 | 0.006588593 | 0.000371716 | 0.000992725 | 0.174762114  | 0.081256039  | COL4A2       |
| chr8  | 67042176  | 67042666  | 491  | * | 2 | 1.32789E-15 | 0.012614673 | 0.000371743 | 0.001216711 | -0.299311959 | -0.152533132 | TRIM55       |
| chr6  | 26439594  | 26440101  | 508  | * | 2 | 2.0576E-19  | 0.000763159 | 0.000372234 | 0.000374827 | -0.208041385 | -0.086550103 |              |
| chr17 | 79228937  | 79229385  | 449  | * | 3 | 2.16499E-26 | 8.94149E-08 | 0.000373785 | 3.37204E-07 | -0.165183426 | -0.150712549 | SLC38A10     |
| chr19 | 39143287  | 39143850  | 564  | * | 2 | 8.00881E-20 | 0.000259133 | 0.00037461  | 0.000198743 | -0.091012621 | -0.081528386 | ACTN4        |

|       |           |           |      |   |   |             |             |             |             |              |              |                       |
|-------|-----------|-----------|------|---|---|-------------|-------------|-------------|-------------|--------------|--------------|-----------------------|
| chr5  | 177814702 | 177815693 | 992  | * | 3 | 1.83196E-20 | 0.003123861 | 0.000378118 | 0.000466807 | -0.412452594 | -0.158792558 | COL23A1               |
| chr10 | 73149975  | 73150448  | 474  | * | 2 | 2.66126E-15 | 0.04552951  | 0.000378255 | 0.001611538 | 0.203940526  | 0.104935551  |                       |
| chr12 | 26624359  | 26625047  | 689  | * | 2 | 2.87796E-18 | 9.94927E-07 | 0.000378355 | 2.4965E-06  | -0.27412654  | -0.242420865 | ITPR2                 |
| chr5  | 54197311  | 54197508  | 198  | * | 2 | 3.24909E-20 | 1.08969E-06 | 0.000379788 | 2.71221E-06 | -0.197210919 | -0.174816284 |                       |
| chr17 | 73310148  | 73310221  | 74   | * | 2 | 7.06403E-20 | 2.67038E-06 | 0.000379812 | 6.02114E-06 | -0.214842014 | -0.207927943 |                       |
| chr10 | 111659687 | 111659903 | 217  | * | 2 | 1.04538E-13 | 0.027469216 | 0.000380238 | 0.001488245 | -0.316347449 | -0.163867221 | XPNPEP1               |
| chr10 | 73083123  | 73083223  | 101  | * | 2 | 1.90523E-21 | 7.52551E-06 | 0.000382779 | 1.46133E-05 | -0.37474319  | -0.227141741 | SLC29A3               |
| chr20 | 3745817   | 3746315   | 499  | * | 2 | 2.61932E-21 | 1.13667E-06 | 0.000383001 | 2.82081E-06 | -0.33108915  | -0.282565197 | C20orf27              |
| chr9  | 7844737   | 7844790   | 54   | * | 2 | 4.2003E-20  | 1.02987E-06 | 0.000383635 | 2.58042E-06 | -0.3595772   | -0.351724056 | TMEM261               |
| chr8  | 128403369 | 128403642 | 274  | * | 2 | 4.57562E-14 | 0.014337379 | 0.000383752 | 0.001291075 | -0.301114088 | -0.163037602 | RP11-382A18.2, CASC8  |
| chr22 | 42304331  | 42304580  | 250  | * | 2 | 9.96539E-15 | 0.004239243 | 0.000383857 | 0.000861983 | -0.206478418 | -0.083385245 |                       |
| chr2  | 176326848 | 176326854 | 7    | * | 2 | 4.85552E-20 | 1.08167E-06 | 0.000383966 | 2.69799E-06 | -0.374084912 | -0.338839207 |                       |
| chr3  | 30820620  | 30820664  | 45   | * | 2 | 8.27066E-22 | 1.04289E-06 | 0.000384397 | 2.61062E-06 | -0.383519339 | -0.37810186  | GADL1                 |
| chr4  | 77518782  | 77519000  | 219  | * | 2 | 8.02198E-20 | 1.3934E-06  | 0.000384683 | 3.39046E-06 | -0.303617003 | -0.212665182 | SHROOM3               |
| chr3  | 127455234 | 127456204 | 971  | * | 4 | 3.61693E-34 | 7.55393E-07 | 0.000385061 | 5.404E-08   | 0.243839768  | 0.163921076  | MGLL                  |
| chr12 | 94676369  | 94676940  | 572  | * | 6 | 1.04691E-44 | 2.53886E-09 | 0.000385681 | 9.23898E-10 | -0.296668073 | -0.169988353 | PLXNC1, RP11-1105G2.3 |
| chr22 | 24861698  | 24861780  | 83   | * | 2 | 5.72196E-17 | 7.57884E-05 | 0.000385907 | 8.80085E-05 | 0.237302883  | 0.163174181  | ADORA2A-AS1           |
| chr7  | 41045529  | 41046414  | 886  | * | 2 | 8.91318E-16 | 1.2334E-06  | 0.000386282 | 3.04E-06    | -0.225136288 | -0.222820217 |                       |
| chr12 | 8171633   | 8172018   | 386  | * | 2 | 3.18351E-16 | 0.003285736 | 0.000386338 | 0.00078026  | -0.096667263 | -0.04027395  |                       |
| chr12 | 117039927 | 117040247 | 321  | * | 2 | 3.52931E-16 | 0.000177183 | 0.000387445 | 0.000157974 | -0.330052298 | -0.179642818 | RP11-497G19.3         |
| chr8  | 126649807 | 126650226 | 420  | * | 2 | 2.33389E-20 | 2.44828E-06 | 0.000388476 | 5.60176E-06 | -0.308368761 | -0.206587993 |                       |
| chr15 | 63126894  | 63128725  | 1832 | * | 7 | 7.41491E-45 | 0.000438434 | 0.000389552 | 1.19518E-06 | -0.426155238 | -0.131075736 | TLN2, RP11-1069G10.1  |
| chr2  | 169939873 | 169939876 | 4    | * | 2 | 1.94318E-19 | 1.73261E-06 | 0.000389868 | 4.12774E-06 | -0.304481198 | -0.29149894  | DHRS9                 |
| chr16 | 11330882  | 11330934  | 53   | * | 2 | 3.90202E-20 | 1.03307E-06 | 0.000392246 | 2.59501E-06 | -0.26870292  | -0.23946768  |                       |
| chr2  | 39355435  | 39356767  | 1333 | * | 3 | 1.20553E-23 | 0.014210042 | 0.000392589 | 1.81326E-05 | -0.307174134 | -0.036406325 | Y_RNA                 |
| chr11 | 34477595  | 34477922  | 328  | * | 2 | 3.05792E-14 | 0.019026674 | 0.000392927 | 0.001412075 | -0.266808202 | -0.138647946 | CAT                   |
| chr2  | 102233707 | 102234069 | 363  | * | 2 | 4.25728E-16 | 0.012811859 | 0.000394219 | 0.001278188 | -0.303427776 | -0.128198182 |                       |
| chr6  | 136724406 | 136724451 | 46   | * | 2 | 5.35219E-18 | 5.99049E-06 | 0.000395827 | 1.21605E-05 | -0.260819553 | -0.209138312 | MAP7                  |
| chr17 | 37791589  | 37791687  | 99   | * | 2 | 1.10689E-22 | 1.22866E-06 | 0.00039583  | 3.03946E-06 | -0.394407085 | -0.355581378 | PPP1R1B               |

|       |           |           |      |   |   |             |             |             |             |              |              |                      |
|-------|-----------|-----------|------|---|---|-------------|-------------|-------------|-------------|--------------|--------------|----------------------|
| chr8  | 96060571  | 96060712  | 142  | * | 2 | 1.35204E-17 | 1.7267E-05  | 0.000396776 | 2.90267E-05 | -0.296405293 | -0.252711456 | NDUFAF6              |
| chr20 | 30793018  | 30794065  | 1048 | * | 3 | 2.0674E-25  | 0.000957853 | 0.00039735  | 1.08203E-05 | -0.367798901 | -0.236185681 | PLAGL2               |
| chr10 | 5333615   | 5334280   | 666  | * | 3 | 6.53644E-28 | 4.34295E-09 | 0.000397534 | 2.53091E-08 | -0.267237376 | -0.225492249 |                      |
| chr17 | 53847116  | 53847554  | 439  | * | 2 | 7.74733E-16 | 0.004984024 | 0.000398326 | 0.000941734 | -0.239167068 | -0.126145418 | PCTP                 |
| chr1  | 2081984   | 2082848   | 865  | * | 6 | 9.91225E-53 | 3.48834E-12 | 0.000398571 | 3.44111E-12 | -0.395487356 | -0.235812297 | PRKCZ                |
| chr14 | 65183532  | 65183677  | 146  | * | 3 | 3.86732E-24 | 4.12345E-06 | 0.000399518 | 2.78053E-06 | -0.202211867 | -0.139608552 | PLEKHG3              |
| chr4  | 37867680  | 37868470  | 791  | * | 2 | 1.04336E-16 | 4.16104E-05 | 0.000400396 | 5.75062E-05 | -0.404728568 | -0.119454719 |                      |
| chr16 | 11443268  | 11445004  | 1737 | * | 6 | 3.82964E-38 | 0.000157049 | 0.000403291 | 7.13441E-06 | -0.322972384 | -0.094354499 | RMI2                 |
| chr1  | 44423187  | 44423424  | 238  | * | 2 | 4.3317E-18  | 2.97031E-05 | 0.000406089 | 4.47111E-05 | -0.33266392  | -0.21661471  | IPO13                |
| chr4  | 185754633 | 185755032 | 400  | * | 3 | 1.25743E-28 | 4.93132E-09 | 0.000406547 | 2.86273E-08 | -0.299144476 | -0.23139707  |                      |
| chr11 | 33308269  | 33308345  | 77   | * | 2 | 1.65379E-19 | 1.35072E-06 | 0.000409325 | 3.32549E-06 | -0.425013181 | -0.334881432 | HIPK3                |
| chr4  | 147029689 | 147030199 | 511  | * | 3 | 4.03209E-18 | 0.22716995  | 0.000409355 | 0.005461719 | -0.278575544 | -0.095099635 |                      |
| chr7  | 137661683 | 137662133 | 451  | * | 2 | 2.5916E-15  | 0.014706531 | 0.000409508 | 0.001366818 | -0.271652647 | -0.131166997 | CREB3L2              |
| chr3  | 13087700  | 13088006  | 307  | * | 2 | 5.17567E-14 | 0.010539748 | 0.000411677 | 0.001247509 | 0.245828891  | 0.116722781  | IQSEC1               |
| chr17 | 4064737   | 4065331   | 595  | * | 2 | 6.48103E-21 | 1.13437E-06 | 0.000411975 | 2.84242E-06 | -0.32911971  | -0.264209438 | CYB5D2               |
| chr12 | 47481988  | 47482450  | 463  | * | 2 | 4.10975E-15 | 0.005096654 | 0.00041305  | 0.000974139 | 0.212517925  | 0.098278915  | PCED1B               |
| chr17 | 67497778  | 67497879  | 102  | * | 2 | 1.99615E-19 | 1.42329E-06 | 0.000413265 | 3.49056E-06 | -0.323589521 | -0.315708903 | MAP2K6, RP1-193H18.3 |
| chr16 | 15796887  | 15797297  | 411  | * | 2 | 9.5734E-21  | 1.13526E-06 | 0.000414279 | 2.84646E-06 | -0.260739092 | -0.240417308 | NDE1, MYH11          |
| chr16 | 50718807  | 50719042  | 236  | * | 2 | 1.42529E-19 | 6.14908E-06 | 0.000414711 | 1.25593E-05 | 0.146162606  | 0.128065198  |                      |
| chr8  | 126588554 | 126588891 | 338  | * | 2 | 3.32615E-16 | 8.45771E-05 | 0.000414928 | 9.78997E-05 | -0.433479504 | -0.262098129 |                      |
| chr20 | 1550119   | 1550240   | 122  | * | 2 | 2.08454E-19 | 1.45826E-06 | 0.000415346 | 3.57011E-06 | -0.275120663 | -0.265824024 | RP4-576H24.4, SIRPB1 |
| chr1  | 9338002   | 9338423   | 422  | * | 3 | 2.1764E-24  | 0.000283596 | 0.000416794 | 1.33554E-05 | -0.276744495 | -0.166176038 |                      |
| chr19 | 56130797  | 56131083  | 287  | * | 2 | 1.52372E-17 | 1.12893E-05 | 0.000417075 | 2.08672E-05 | -0.136582862 | -0.091786564 |                      |
| chr1  | 232735381 | 232735450 | 70   | * | 2 | 1.22348E-17 | 2.16073E-05 | 0.000417267 | 3.51835E-05 | -0.297690094 | -0.204122326 |                      |
| chr19 | 2943570   | 2943999   | 430  | * | 2 | 3.20664E-15 | 0.00933923  | 0.000419212 | 0.001217659 | -0.19131161  | -0.07811557  | ZNF77                |
| chr12 | 122245655 | 122246256 | 602  | * | 2 | 1.44291E-16 | 0.012227781 | 0.00041944  | 0.001322324 | -0.253671716 | -0.132661858 | SETD1B               |
| chr2  | 26231776  | 26232329  | 554  | * | 2 | 1.78482E-15 | 0.003575198 | 0.000419483 | 0.000854165 | -0.085062147 | -0.052478806 |                      |
| chr1  | 235922479 | 235922666 | 188  | * | 2 | 9.94803E-17 | 1.88422E-05 | 0.000420632 | 3.16404E-05 | -0.325905621 | -0.198609351 | LYST                 |
| chr2  | 102978461 | 102978605 | 145  | * | 3 | 7.47372E-15 | 0.03758336  | 0.000421014 | 0.003067897 | -0.257113359 | -0.096462635 | IL18R1               |

|       |           |           |      |   |   |             |             |             |             |              |              |                        |
|-------|-----------|-----------|------|---|---|-------------|-------------|-------------|-------------|--------------|--------------|------------------------|
| chr16 | 70597619  | 70597967  | 349  | * | 3 | 4.5916E-22  | 4.65352E-06 | 0.000421082 | 8.70886E-06 | -0.258153903 | -0.115005514 | SF3B3                  |
| chr15 | 49785386  | 49785618  | 233  | * | 2 | 1.74627E-14 | 0.00053353  | 0.000421897 | 0.000327497 | -0.398510393 | -0.20849603  | FAM227B                |
| chr4  | 40588553  | 40589108  | 556  | * | 2 | 1.2243E-20  | 5.12075E-05 | 0.000422114 | 6.83971E-05 | -0.145366769 | -0.104902246 | RBM47                  |
| chr2  | 223670481 | 223670610 | 130  | * | 2 | 2.14347E-19 | 1.3277E-06  | 0.000422368 | 3.28813E-06 | -0.385645627 | -0.378728901 |                        |
| chr4  | 106080109 | 106080663 | 555  | * | 2 | 3.20703E-15 | 0.014065802 | 0.000422422 | 0.001383087 | -0.099553595 | -0.053917517 | TET2                   |
| chr3  | 122487700 | 122488513 | 814  | * | 2 | 4.5761E-16  | 9.63333E-05 | 0.000422428 | 0.000108119 | -0.254003737 | -0.168593054 | HSPBAP1                |
| chr6  | 15901093  | 15901433  | 341  | * | 2 | 6.41005E-14 | 0.023841521 | 0.00042244  | 0.001574202 | -0.28826776  | -0.150027409 |                        |
| chr11 | 6225537   | 6226437   | 901  | * | 5 | 1.06645E-26 | 0.001083989 | 0.000422588 | 3.70558E-05 | -0.376091888 | -0.107605474 |                        |
| chr3  | 4765914   | 4766210   | 297  | * | 2 | 1.20446E-14 | 0.007356579 | 0.000424522 | 0.001135188 | -0.204195416 | -0.082809421 | ITPR1                  |
| chr8  | 96099956  | 96100187  | 232  | * | 3 | 4.48378E-18 | 0.001631735 | 0.000424684 | 0.000249313 | -0.156454132 | -0.078374757 | NDUFAF6, RP11-320N21.2 |
| chr2  | 171600867 | 171600960 | 94   | * | 3 | 1.39267E-24 | 1.1329E-07  | 0.000425104 | 4.21185E-07 | -0.387412649 | -0.302150987 | ACO07405.4             |
| chr5  | 39101019  | 39101380  | 362  | * | 2 | 5.76265E-14 | 0.029753865 | 0.000426197 | 0.001658648 | -0.240336165 | -0.130187837 |                        |
| chr5  | 132160489 | 132161127 | 639  | * | 3 | 2.7881E-21  | 0.2445477   | 0.000426902 | 0.005761709 | -0.2804897   | -0.095152133 | SHROOM1                |
| chr12 | 10324843  | 10325581  | 739  | * | 7 | 2.399E-39   | 0.003663736 | 0.000427351 | 1.11584E-05 | -0.421900065 | -0.130940387 | TMEM52B                |
| chr12 | 104063217 | 104064350 | 1134 | * | 4 | 1.05114E-21 | 0.013539853 | 0.000428046 | 0.000433349 | -0.311285058 | -0.060918261 | STAB2                  |
| chr16 | 4912632   | 4912779   | 148  | * | 2 | 1.6542E-18  | 2.91424E-06 | 0.000428527 | 6.63813E-06 | -0.312226189 | -0.303830274 | UBN1                   |
| chr11 | 821723    | 822402    | 680  | * | 5 | 3.22062E-45 | 5.95697E-13 | 0.00042891  | 1.44842E-11 | -0.272359914 | -0.203822199 | PNPLA2                 |
| chr22 | 39570107  | 39570729  | 623  | * | 2 | 4.27772E-17 | 0.000924652 | 0.000429962 | 0.00045146  | -0.263577344 | -0.143782866 |                        |
| chr22 | 23763821  | 23764189  | 369  | * | 2 | 6.80343E-14 | 0.117233872 | 0.000430893 | 0.001974735 | -0.320072564 | -0.16037654  |                        |
| chr18 | 46202798  | 46203533  | 736  | * | 2 | 5.00032E-17 | 0.000355722 | 0.000431683 | 0.000259556 | -0.237181212 | -0.144456591 | CTIF, RP11-426J5.2     |
| chr2  | 8438973   | 8439217   | 245  | * | 2 | 2.61434E-19 | 1.37111E-06 | 0.000431697 | 3.3949E-06  | -0.232721041 | -0.198749081 | LINC00299              |
| chr4  | 105978652 | 105979020 | 369  | * | 2 | 3.32119E-19 | 1.26398E-06 | 0.000432449 | 3.15476E-06 | -0.330076473 | -0.29522132  | RP11-556I14.1          |
| chr12 | 56029543  | 56030242  | 700  | * | 2 | 1.02111E-18 | 0.003896064 | 0.000432459 | 0.000903528 | -0.305871407 | -0.14607016  |                        |
| chr1  | 95581522  | 95581952  | 431  | * | 2 | 1.15211E-18 | 0.02468157  | 0.000432474 | 0.001616109 | -0.069601217 | -0.043725273 |                        |
| chr18 | 74764374  | 74765155  | 782  | * | 3 | 5.06313E-20 | 0.003267252 | 0.000433534 | 0.000191898 | -0.122557212 | -0.068862896 | MBP                    |
| chr2  | 207987538 | 207987951 | 414  | * | 2 | 3.34696E-17 | 0.063182677 | 0.000433785 | 0.001886213 | -0.3360309   | -0.155947866 | KLF7                   |
| chr17 | 33884702  | 33885742  | 1041 | * | 3 | 4.68837E-25 | 0.000475706 | 0.00043409  | 1.78702E-05 | 0.253278901  | 0.114376894  | SLFN14                 |
| chr21 | 39810663  | 39811743  | 1081 | * | 4 | 1.36194E-21 | 3.99164E-05 | 0.000434531 | 1.51751E-06 | -0.387650233 | -0.19755239  | ERG                    |
| chr10 | 43468702  | 43469164  | 463  | * | 2 | 1.38263E-14 | 0.011040396 | 0.000435304 | 0.001319281 | -0.318204096 | -0.163932608 |                        |

|       |           |           |      |   |   |             |             |             |             |              |              |                     |
|-------|-----------|-----------|------|---|---|-------------|-------------|-------------|-------------|--------------|--------------|---------------------|
| chr12 | 116718617 | 116719189 | 573  | * | 2 | 4.48408E-15 | 0.050788916 | 0.000435352 | 0.001841707 | -0.351571817 | -0.178053511 |                     |
| chr11 | 59822727  | 59824161  | 1435 | * | 9 | 4.58847E-62 | 3.33179E-19 | 0.000435802 | 5.54707E-17 | -0.38460699  | -0.206804112 | MS4A3               |
| chr4  | 185923877 | 185924141 | 265  | * | 3 | 2.22564E-22 | 9.20111E-06 | 0.000436028 | 4.41766E-06 | -0.265416704 | -0.182088999 | RP11-386B13.4       |
| chr6  | 152950812 | 152950866 | 55   | * | 2 | 3.90228E-20 | 1.25889E-06 | 0.000436081 | 3.14661E-06 | -0.332136989 | -0.327023333 | SYNE1               |
| chr1  | 207509316 | 207509334 | 19   | * | 2 | 2.06835E-19 | 1.47472E-06 | 0.000436221 | 3.63064E-06 | -0.344178113 | -0.296874737 | CD55                |
| chr15 | 76431162  | 76431489  | 328  | * | 2 | 1.73289E-15 | 0.019152676 | 0.000436423 | 0.001536465 | -0.303252921 | -0.155243444 | C15orf27            |
| chr10 | 5734571   | 5735349   | 779  | * | 4 | 3.17646E-19 | 0.054454141 | 0.000439426 | 0.004056894 | -0.210860643 | -0.066091269 | FAM208B             |
| chr14 | 105751629 | 105751711 | 83   | * | 2 | 6.60854E-15 | 0.006392961 | 0.000441051 | 0.00111001  | -0.338723455 | -0.17908169  | BRF1                |
| chr15 | 89939252  | 89939709  | 458  | * | 3 | 2.49621E-20 | 0.016639818 | 0.000441821 | 8.6404E-05  | -0.237555305 | -0.1173031   | LINC00925           |
| chr16 | 88907184  | 88907370  | 187  | * | 2 | 9.07527E-21 | 1.29617E-06 | 0.00044197  | 3.23651E-06 | -0.412993063 | -0.328145832 | GALNS               |
| chr5  | 107978715 | 107979173 | 459  | * | 2 | 2.46389E-14 | 0.08324713  | 0.000442012 | 0.001970159 | 0.222871996  | 0.113254723  |                     |
| chr1  | 31873665  | 31874123  | 459  | * | 2 | 2.19495E-14 | 0.022956959 | 0.00044211  | 0.001619109 | -0.298574018 | -0.16189494  |                     |
| chr20 | 2085157   | 2085344   | 188  | * | 2 | 6.53011E-15 | 0.000209665 | 0.000442397 | 0.000187379 | -0.340876967 | -0.228065327 | STK35               |
| chr1  | 116270626 | 116271272 | 647  | * | 4 | 1.43982E-27 | 4.88603E-07 | 0.000443515 | 9.07001E-07 | -0.321537378 | -0.185518216 | CASQ2               |
| chr3  | 141005905 | 141006210 | 306  | * | 2 | 2.16929E-13 | 0.030568134 | 0.000443679 | 0.00172278  | -0.318320717 | -0.156096054 | ACPL2, RP11-438D8.2 |
| chr7  | 139108026 | 139108111 | 86   | * | 2 | 3.65132E-13 | 0.073765475 | 0.000443799 | 0.001955046 | -0.348055421 | -0.175541981 | C7orf55-LUC7L2      |
| chr11 | 70432884  | 70433293  | 410  | * | 3 | 5.61801E-16 | 0.06629329  | 0.000444593 | 0.003012028 | -0.35094326  | -0.124438509 | SHANK2              |
| chr5  | 154172209 | 154172825 | 617  | * | 2 | 7.06868E-21 | 5.24229E-05 | 0.000444857 | 7.09015E-05 | -0.285140389 | -0.197707293 | LARP1               |
| chr6  | 166649636 | 166650404 | 769  | * | 4 | 3.05852E-32 | 4.07057E-07 | 0.000445189 | 2.05437E-07 | -0.318347469 | -0.128948544 |                     |
| chr3  | 48557198  | 48557236  | 39   | * | 2 | 3.52492E-19 | 3.62563E-06 | 0.000445387 | 8.09024E-06 | 0.201391096  | 0.200526653  | PFKFB4              |
| chr17 | 78753273  | 78754372  | 1100 | * | 8 | 2.47617E-52 | 2.2083E-09  | 0.000446441 | 1.09133E-10 | -0.314623698 | -0.147390096 | RPTOR               |
| chr12 | 32638773  | 32638839  | 67   | * | 3 | 5.75395E-25 | 3.16068E-07 | 0.00044688  | 1.12008E-06 | -0.237501008 | -0.210307069 | FGD4                |
| chr6  | 138055931 | 138056102 | 172  | * | 2 | 1.28188E-17 | 1.12316E-05 | 0.000447037 | 2.1144E-05  | -0.302682419 | -0.236648616 | RP11-356I2.1        |
| chr2  | 216370262 | 216370291 | 30   | * | 2 | 1.51174E-18 | 2.17024E-06 | 0.000448354 | 5.15279E-06 | -0.282966487 | -0.265067339 |                     |
| chr6  | 138195986 | 138196387 | 402  | * | 3 | 1.04104E-23 | 0.000672963 | 0.000449127 | 2.73343E-05 | -0.39821153  | -0.248804209 | TNFAIP3             |
| chr19 | 54584636  | 54585167  | 532  | * | 5 | 1.53687E-32 | 5.9127E-05  | 0.000450289 | 8.35781E-07 | -0.414313203 | -0.200219758 |                     |
| chr22 | 23730033  | 23730059  | 27   | * | 2 | 3.30977E-18 | 5.60381E-06 | 0.000450827 | 1.18109E-05 | 0.177067217  | 0.12233289   |                     |
| chr4  | 155469629 | 155471134 | 1506 | * | 6 | 1.71237E-24 | 0.214059695 | 0.000450829 | 0.007640897 | -0.34275045  | -0.04765539  | PLRG1               |
| chr22 | 40685946  | 40686295  | 350  | * | 2 | 9.57862E-18 | 7.38322E-06 | 0.000451271 | 1.49323E-05 | -0.206746193 | -0.18994967  | TNRC6B              |

|       |           |           |      |   |   |             |             |             |             |              |              |                       |
|-------|-----------|-----------|------|---|---|-------------|-------------|-------------|-------------|--------------|--------------|-----------------------|
| chr1  | 12774815  | 12775608  | 794  | * | 4 | 1.97299E-27 | 0.018243072 | 0.000451653 | 2.67734E-05 | -0.40012032  | -0.178392242 |                       |
| chr2  | 239463246 | 239463810 | 565  | * | 5 | 2.6707E-33  | 7.79234E-06 | 0.000451922 | 1.12129E-06 | -0.350588458 | -0.158575729 | LINC01107             |
| chr6  | 140160925 | 140161193 | 269  | * | 2 | 4.11642E-19 | 1.35833E-06 | 0.000452745 | 3.38725E-06 | -0.310189838 | -0.286480608 |                       |
| chr18 | 9215747   | 9215818   | 72   | * | 2 | 7.8708E-22  | 2.07545E-06 | 0.00045282  | 4.9591E-06  | -0.288224721 | -0.256841918 | RP11-21J18.1, ANKRD12 |
| chr1  | 182097885 | 182098716 | 832  | * | 4 | 3.77283E-27 | 0.000110674 | 0.000452863 | 1.28958E-05 | -0.403803168 | -0.194975839 | GS1-122H1.2           |
| chr6  | 152639235 | 152639548 | 314  | * | 2 | 7.06005E-15 | 0.045494089 | 0.000455368 | 0.001882995 | -0.246783396 | -0.120334963 | SYNE1                 |
| chr6  | 20907308  | 20907817  | 510  | * | 2 | 1.41107E-14 | 0.011086651 | 0.000456809 | 0.001369513 | -0.259594736 | -0.140950408 | CDKAL1                |
| chr6  | 22113460  | 22113516  | 57   | * | 2 | 2.01062E-17 | 5.3728E-06  | 0.000456852 | 1.14232E-05 | -0.280099023 | -0.261852685 | CASC15                |
| chr17 | 650113    | 650835    | 723  | * | 6 | 1.39586E-23 | 0.768852991 | 0.000457479 | 0.040860109 | -0.125932358 | -0.024234043 | GEMIN4                |
| chr7  | 151442351 | 151442967 | 617  | * | 4 | 6.12027E-33 | 1.54278E-06 | 0.000458126 | 1.33928E-07 | -0.379213757 | -0.234650922 | PRKAG2                |
| chr11 | 103930498 | 103930844 | 347  | * | 2 | 4.10806E-14 | 0.001833945 | 0.000458278 | 0.000667617 | -0.342176759 | -0.182802681 | PDGFD                 |
| chr6  | 161790605 | 161790663 | 59   | * | 2 | 2.41594E-17 | 8.67301E-06 | 0.000459222 | 1.71644E-05 | -0.361719912 | -0.267574106 | PARK2                 |
| chr3  | 186982752 | 186982969 | 218  | * | 2 | 1.26951E-14 | 0.000186507 | 0.000460816 | 0.000176565 | 0.124759203  | 0.088592966  | MASP1                 |
| chr13 | 113343376 | 113343878 | 503  | * | 2 | 4.60551E-18 | 0.032558901 | 0.000462213 | 0.001802621 | -0.178615135 | -0.090913028 |                       |
| chr9  | 71459366  | 71459620  | 255  | * | 2 | 2.69172E-20 | 1.42774E-06 | 0.00046237  | 3.55324E-06 | -0.338635873 | -0.270475872 | PIP5K1B               |
| chr15 | 58818581  | 58819005  | 425  | * | 2 | 8.42426E-19 | 1.87097E-06 | 0.000462811 | 4.53403E-06 | -0.34535072  | -0.308768034 | LIPC                  |
| chr18 | 77551953  | 77552568  | 616  | * | 3 | 9.14319E-22 | 0.000116148 | 0.000463684 | 5.93551E-05 | -0.345869394 | -0.16990026  |                       |
| chr8  | 82042993  | 82043566  | 574  | * | 2 | 1.20467E-14 | 0.083090138 | 0.000463844 | 0.002053621 | -0.225035306 | -0.110842023 |                       |
| chr7  | 50726586  | 50727932  | 1347 | * | 5 | 2.1764E-24  | 0.003743341 | 0.000465495 | 0.000141242 | -0.342682588 | -0.10082496  | GRB10                 |
| chr11 | 122612819 | 122612858 | 40   | * | 2 | 2.17955E-16 | 1.46309E-05 | 0.000466242 | 2.65441E-05 | -0.195746912 | -0.159657292 | UBASH3B               |
| chr6  | 89759594  | 89760139  | 546  | * | 2 | 2.1713E-15  | 0.000558837 | 0.000467339 | 0.000355042 | -0.255747326 | -0.168361509 |                       |
| chr14 | 61965603  | 61966327  | 725  | * | 2 | 3.33559E-16 | 0.000727622 | 0.000467466 | 0.000413812 | -0.29876951  | -0.161598095 | PRKCH                 |
| chr5  | 16455785  | 16455898  | 114  | * | 3 | 1.19948E-20 | 4.91894E-05 | 0.000467658 | 1.56552E-05 | -0.306761422 | -0.162434448 | ZNF622                |
| chr5  | 172280684 | 172280876 | 193  | * | 2 | 9.25353E-17 | 0.000257209 | 0.000469999 | 0.000220131 | -0.248020861 | -0.173104516 | ERGIC1                |
| chr5  | 133837030 | 133837273 | 244  | * | 2 | 8.39699E-14 | 0.009882334 | 0.000471218 | 0.001351765 | 0.179833063  | 0.085239426  |                       |
| chr3  | 155570275 | 155570809 | 535  | * | 3 | 3.49503E-19 | 0.046367175 | 0.000471555 | 0.003077794 | -0.26622949  | -0.108157445 | SLC33A1               |
| chr4  | 1939509   | 1939928   | 420  | * | 3 | 1.29445E-15 | 0.044691031 | 0.000471594 | 0.003550496 | -0.31756944  | -0.114788158 | WHSC1                 |
| chr2  | 20706515  | 20707110  | 596  | * | 3 | 2.69485E-17 | 0.07181327  | 0.000471597 | 0.003827063 | 0.22735859   | 0.0716873    |                       |
| chr17 | 465530    | 466113    | 584  | * | 2 | 1.44983E-14 | 0.212452047 | 0.000474532 | 0.002200233 | -0.213113312 | -0.106436117 | VPS53                 |

|       |           |           |     |   |   |             |             |             |             |              |              |                         |
|-------|-----------|-----------|-----|---|---|-------------|-------------|-------------|-------------|--------------|--------------|-------------------------|
| chr12 | 7901661   | 7902153   | 493 | * | 2 | 2.16065E-21 | 2.58332E-06 | 0.000474994 | 6.06978E-06 | 0.184584789  | 0.151926561  | CLEC4C                  |
| chr12 | 105042855 | 105043367 | 513 | * | 2 | 1.26525E-16 | 3.52169E-05 | 0.000475056 | 5.35976E-05 | -0.328253533 | -0.201981356 | CHST11                  |
| chr2  | 102890416 | 102890476 | 61  | * | 2 | 1.48497E-13 | 0.000437677 | 0.000475686 | 0.000309383 | -0.323079105 | -0.177301168 |                         |
| chr10 | 352348    | 352668    | 321 | * | 2 | 3.14557E-13 | 0.015521083 | 0.000476523 | 0.001558636 | -0.369369432 | -0.191635988 | DIP2C                   |
| chr20 | 24961060  | 24961593  | 534 | * | 2 | 2.04378E-14 | 0.018152697 | 0.000476531 | 0.001624212 | -0.19261808  | -0.087831699 | APMAP                   |
| chr3  | 52877048  | 52877766  | 719 | * | 6 | 1.22857E-42 | 1.56654E-09 | 0.000477351 | 9.02367E-10 | -0.418780669 | -0.218771917 | TMEM110-MUSTN1, TMEM110 |
| chr16 | 474271    | 474937    | 667 | * | 5 | 2.18989E-43 | 1.03688E-08 | 0.000477386 | 1.98891E-09 | -0.264016764 | -0.179908684 |                         |
| chr8  | 134369245 | 134369320 | 76  | * | 2 | 6.92001E-14 | 0.001111174 | 0.000478305 | 0.000529797 | -0.276166418 | -0.152995602 |                         |
| chr15 | 101469838 | 101470215 | 378 | * | 2 | 3.48876E-15 | 0.001830487 | 0.000480205 | 0.000686325 | 0.273138012  | 0.148565514  | LRRK1                   |
| chr16 | 85539811  | 85540297  | 487 | * | 2 | 3.06444E-16 | 0.006017179 | 0.000480393 | 0.001152799 | -0.327040763 | -0.166707771 |                         |
| chr2  | 152220410 | 152220529 | 120 | * | 2 | 2.60552E-12 | 0.011533847 | 0.000481779 | 0.001442438 | -0.280843142 | -0.147042389 | TNFAIP6                 |
| chr11 | 3660884   | 3661319   | 436 | * | 2 | 2.08331E-15 | 0.009175708 | 0.000481792 | 0.001341115 | -0.306015719 | -0.147404708 | ART5                    |
| chr7  | 47846057  | 47846424  | 368 | * | 2 | 2.87638E-18 | 1.21939E-05 | 0.000483639 | 2.30712E-05 | -0.310224386 | -0.209114623 | C7orf69, HUS1, PKD1L1   |
| chr13 | 24854061  | 24854830  | 770 | * | 2 | 2.65346E-16 | 0.04956337  | 0.00048497  | 0.002009921 | -0.383804008 | -0.189108418 | RP11-307N16.6, SPATA13  |
| chr2  | 42325942  | 42326070  | 129 | * | 2 | 6.7922E-17  | 3.79299E-05 | 0.000486183 | 5.71724E-05 | -0.29070267  | -0.205837778 |                         |
| chr12 | 2393671   | 2393684   | 14  | * | 2 | 9.65184E-19 | 1.56068E-06 | 0.000487478 | 3.87786E-06 | -0.251423935 | -0.234790459 | CACNA1C, CACNA1C-IT3    |
| chr15 | 56703433  | 56703763  | 331 | * | 2 | 1.77988E-13 | 0.007959862 | 0.00048833  | 0.001290526 | 0.219379515  | 0.102246878  | TEX9                    |
| chr14 | 65098936  | 65099398  | 463 | * | 2 | 2.79047E-15 | 0.000198208 | 0.000488747 | 0.000188715 | -0.339770814 | -0.121366152 |                         |
| chr17 | 66301429  | 66301554  | 126 | * | 2 | 3.92207E-12 | 0.03134133  | 0.000488875 | 0.001873325 | -0.297181903 | -0.157202508 | ARSG                    |
| chr5  | 36679892  | 36680436  | 545 | * | 2 | 3.52319E-14 | 0.098135716 | 0.000488983 | 0.002179269 | -0.248717257 | -0.122601245 | SLC1A3, CTD-2353F22.1   |
| chr6  | 46096318  | 46096367  | 50  | * | 2 | 1.46509E-20 | 9.94135E-06 | 0.000490782 | 1.95379E-05 | -0.378095374 | -0.260808537 | RP1-8B1.4               |
| chr2  | 28601340  | 28601410  | 71  | * | 2 | 1.48429E-15 | 2.45382E-05 | 0.00049132  | 4.08143E-05 | -0.151298888 | -0.121368003 |                         |
| chr2  | 42542416  | 42543153  | 738 | * | 2 | 2.54982E-15 | 0.000176472 | 0.000491546 | 0.000174956 | -0.248590517 | -0.167569159 | EML4                    |
| chr22 | 38326590  | 38327168  | 579 | * | 2 | 1.94516E-15 | 0.121342377 | 0.000491581 | 0.002220698 | -0.215284737 | -0.107818483 | MICALL1                 |
| chr20 | 34229823  | 34230453  | 631 | * | 2 | 7.85975E-16 | 0.000355715 | 0.000492081 | 0.00027667  | -0.380814959 | -0.200205509 | CPNE1, RP1-309K20.6     |
| chr22 | 26992969  | 26993176  | 208 | * | 3 | 2.94816E-18 | 0.000981453 | 0.000493613 | 8.02519E-05 | 0.197234281  | 0.108697605  |                         |
| chr5  | 59558467  | 59559236  | 770 | * | 5 | 2.3813E-38  | 1.55252E-12 | 0.000495644 | 3.06789E-11 | -0.41116339  | -0.260773822 | PDE4D                   |
| chr9  | 73195793  | 73196319  | 527 | * | 2 | 5.25884E-14 | 0.439424597 | 0.000496204 | 0.002307157 | -0.337878823 | -0.166909416 | TRPM3                   |
| chr15 | 94791949  | 94792045  | 97  | * | 2 | 9.24617E-13 | 0.001421637 | 0.000496851 | 0.000616512 | -0.218183536 | -0.134372971 | MCTP2                   |

|       |           |           |      |   |    |             |             |             |             |              |              |                       |
|-------|-----------|-----------|------|---|----|-------------|-------------|-------------|-------------|--------------|--------------|-----------------------|
| chr16 | 85470485  | 85470674  | 190  | * | 3  | 1.11664E-13 | 0.289243692 | 0.000497216 | 0.00573106  | 0.248586211  | 0.091878724  |                       |
| chr1  | 232644166 | 232644483 | 318  | * | 2  | 7.64914E-13 | 0.038067639 | 0.000498064 | 0.001971138 | -0.390459313 | -0.198200653 | SIPA1L2               |
| chr7  | 42942369  | 42942901  | 533  | * | 4  | 1.4546E-24  | 3.29891E-06 | 0.000498811 | 6.0302E-06  | -0.356517416 | -0.17802766  |                       |
| chr18 | 5463618   | 5463975   | 358  | * | 2  | 1.10698E-13 | 0.001692622 | 0.000501221 | 0.000677423 | -0.373972963 | -0.211097124 | RP11-286N3.1, EPB41L3 |
| chr11 | 76353433  | 76353533  | 101  | * | 2  | 5.35558E-12 | 0.014678323 | 0.000501526 | 0.001595999 | 0.1630309    | 0.076374643  |                       |
| chr22 | 50227466  | 50227722  | 257  | * | 2  | 1.95434E-12 | 0.040567119 | 0.000501569 | 0.002004088 | -0.37061014  | -0.189160984 | RP3-522J7.6           |
| chr21 | 37501846  | 37502003  | 158  | * | 3  | 1.97098E-22 | 4.48359E-06 | 0.000501846 | 4.43505E-06 | -0.268567876 | -0.179476106 |                       |
| chr10 | 134170262 | 134170702 | 441  | * | 2  | 2.08421E-17 | 6.27568E-06 | 0.000503259 | 1.33065E-05 | -0.340422486 | -0.229655516 | LRRC27                |
| chr12 | 1769331   | 1769824   | 494  | * | 2  | 2.88098E-18 | 0.000217135 | 0.000504257 | 0.000203334 | -0.15329851  | -0.037413084 | MIR3649               |
| chr19 | 4548354   | 4548585   | 232  | * | 3  | 8.96962E-19 | 1.66086E-05 | 0.000504377 | 2.80698E-05 | -0.210007008 | -0.129852256 | SEMA6B                |
| chr6  | 158507063 | 158508543 | 1481 | * | 6  | 2.72533E-42 | 6.68211E-06 | 0.00050454  | 1.02375E-08 | -0.315616205 | -0.190759063 | SYNJ2                 |
| chr21 | 43977332  | 43977377  | 46   | * | 2  | 7.76437E-12 | 0.015799031 | 0.000505969 | 0.001639987 | 0.227316984  | 0.117548603  | SLC37A1               |
| chr2  | 65593761  | 65595186  | 1426 | * | 10 | 3.93368E-52 | 2.04316E-07 | 0.00050789  | 3.95068E-10 | -0.246751041 | -0.112988356 | SPRED2                |
| chr4  | 48637066  | 48637722  | 657  | * | 3  | 2.05686E-19 | 0.000494184 | 0.000508686 | 0.000253372 | 0.213083967  | 0.097196057  | FRYL                  |
| chr11 | 86384670  | 86384908  | 239  | * | 3  | 5.24599E-21 | 0.008710958 | 0.000508887 | 0.00102621  | -0.337771345 | -0.120973711 |                       |
| chr11 | 45757906  | 45758932  | 1027 | * | 3  | 1.06857E-17 | 0.014458793 | 0.000508911 | 0.001139572 | -0.364309376 | -0.140173349 | CTD-2210P24.1         |
| chr19 | 3870806   | 3871442   | 637  | * | 3  | 1.47593E-17 | 0.002016755 | 0.000509013 | 0.000737126 | 0.248801558  | 0.141009478  | FTLP5                 |
| chr17 | 29700948  | 29701389  | 442  | * | 2  | 4.28901E-14 | 0.001550942 | 0.000509126 | 0.000654114 | -0.362090939 | -0.199696197 | NF1                   |
| chr16 | 67206722  | 67207722  | 1001 | * | 4  | 3.40282E-21 | 0.00807437  | 0.000509609 | 0.00136574  | -0.239171394 | -0.049110097 | NOL3                  |
| chr12 | 112074044 | 112074158 | 115  | * | 3  | 2.58549E-23 | 1.14707E-07 | 0.000510111 | 4.8742E-07  | 0.214565199  | 0.164290091  |                       |
| chr22 | 47015531  | 47016623  | 1093 | * | 6  | 1.36557E-38 | 3.15383E-05 | 0.000510655 | 9.85528E-08 | -0.352133081 | -0.132621438 | GRAMD4                |
| chr3  | 14864757  | 14865571  | 815  | * | 4  | 1.36325E-23 | 0.013040015 | 0.000511354 | 5.42595E-05 | -0.360076784 | -0.15484189  | FGD5                  |
| chr11 | 73115015  | 73116329  | 1315 | * | 6  | 1.92133E-38 | 2.9009E-10  | 0.000511358 | 3.52825E-11 | -0.299403025 | -0.214471052 | FAM168A               |
| chr11 | 119551071 | 119551662 | 592  | * | 3  | 1.13972E-22 | 3.38866E-05 | 0.000512002 | 1.03547E-05 | -0.156733293 | -0.095772954 | PVRL1                 |
| chr6  | 16753080  | 16753571  | 492  | * | 3  | 6.83928E-17 | 0.068400727 | 0.000512167 | 0.00171806  | -0.382182085 | -0.139483934 | ATXN1                 |
| chr7  | 45243040  | 45243365  | 326  | * | 2  | 6.15631E-14 | 0.026527135 | 0.000512728 | 0.001881384 | 0.207991401  | 0.101448011  |                       |
| chr3  | 72135680  | 72135799  | 120  | * | 2  | 1.01348E-15 | 2.49973E-05 | 0.000513459 | 4.19491E-05 | -0.230176477 | -0.149345244 | LINC00877             |
| chr9  | 72783051  | 72783091  | 41   | * | 2  | 3.26477E-14 | 9.33501E-05 | 0.000514449 | 0.000114148 | -0.308494007 | -0.225692294 | MAMDC2, MAMDC2-AS1    |
| chr19 | 6234327   | 6234625   | 299  | * | 2  | 2.89971E-13 | 0.001753517 | 0.000514585 | 0.00070054  | -0.224297153 | -0.124344365 | MLLT1                 |



|       |           |           |      |   |   |             |             |             |             |              |              |                  |
|-------|-----------|-----------|------|---|---|-------------|-------------|-------------|-------------|--------------|--------------|------------------|
| chr11 | 72926963  | 72927832  | 870  | * | 5 | 1.57905E-39 | 7.69006E-13 | 0.000516958 | 1.90033E-11 | -0.325454813 | -0.288570719 |                  |
| chr12 | 106620860 | 106621388 | 529  | * | 2 | 7.65373E-14 | 0.026496884 | 0.000518583 | 0.00189809  | -0.174957975 | -0.089582902 |                  |
| chr17 | 66339916  | 66339947  | 32   | * | 2 | 6.46229E-18 | 4.19334E-06 | 0.000518707 | 9.43811E-06 | -0.240068811 | -0.159402049 | ARSG             |
| chr17 | 3623472   | 3623819   | 348  | * | 2 | 1.50252E-15 | 4.37668E-05 | 0.000519085 | 6.5174E-05  | -0.292209863 | -0.177245725 | ITGAE            |
| chr18 | 28786267  | 28786898  | 632  | * | 2 | 1.44425E-15 | 7.97806E-05 | 0.000520546 | 0.000102286 | -0.389132349 | -0.217417976 |                  |
| chr1  | 211725112 | 211725933 | 822  | * | 2 | 7.50717E-15 | 7.31614E-05 | 0.000521564 | 9.60515E-05 | -0.240806452 | -0.077075807 |                  |
| chr14 | 65641106  | 65641415  | 310  | * | 2 | 6.68073E-13 | 0.005341951 | 0.000522029 | 0.001166399 | 0.171257166  | 0.106293696  |                  |
| chr5  | 17401890  | 17402750  | 861  | * | 3 | 6.49256E-25 | 0.00025258  | 0.000522304 | 1.46862E-05 | -0.337853549 | -0.219073206 |                  |
| chr1  | 15738732  | 15739283  | 552  | * | 3 | 5.85837E-15 | 0.115729497 | 0.000522529 | 0.003930242 | -0.228897096 | -0.088810685 | EFHD2            |
| chr16 | 69223771  | 69224882  | 1112 | * | 4 | 2.10223E-30 | 3.49513E-06 | 0.000523442 | 1.63616E-07 | -0.384650005 | -0.210567646 | CIRH1A, SNTB2    |
| chr12 | 95115217  | 95115543  | 327  | * | 2 | 1.30278E-12 | 0.145507439 | 0.000523886 | 0.002370627 | 0.206694208  | 0.10322839   |                  |
| chr14 | 73928420  | 73929106  | 687  | * | 2 | 1.40997E-16 | 0.002895846 | 0.000524596 | 0.000901612 | -0.277544921 | -0.123912379 | NUMB             |
| chr1  | 118150234 | 118150813 | 580  | * | 2 | 2.95756E-16 | 0.016952197 | 0.000524797 | 0.001719221 | -0.192409576 | -0.094653152 | FAM46C           |
| chr9  | 114706631 | 114706971 | 341  | * | 2 | 1.02408E-12 | 0.035371958 | 0.000524842 | 0.002030841 | -0.385211566 | -0.196916223 |                  |
| chr10 | 112117365 | 112117449 | 85   | * | 2 | 2.13714E-16 | 2.08358E-05 | 0.000527634 | 3.65361E-05 | 0.149345889  | 0.143799429  |                  |
| chr12 | 56914153  | 56914766  | 614  | * | 3 | 5.84265E-17 | 0.021192875 | 0.000529705 | 0.002706468 | -0.297577195 | -0.082827127 |                  |
| chr4  | 160188727 | 160189254 | 528  | * | 3 | 1.32267E-20 | 0.003618423 | 0.000531404 | 0.000468743 | -0.341041905 | -0.09026469  | RAPGEF2          |
| chr9  | 101572656 | 101573412 | 757  | * | 2 | 5.31946E-17 | 2.21263E-06 | 0.000531414 | 5.37434E-06 | 0.239037277  | 0.188082566  | GALNT12          |
| chr2  | 58335008  | 58335178  | 171  | * | 3 | 1.76395E-25 | 1.69773E-08 | 0.000532762 | 9.07193E-08 | -0.33180021  | -0.306256387 | VRK2             |
| chr19 | 8749178   | 8749571   | 394  | * | 2 | 6.07703E-13 | 0.060565538 | 0.000532818 | 0.002235094 | -0.285252412 | -0.144670099 |                  |
| chr22 | 20019674  | 20020377  | 704  | * | 4 | 6.36358E-29 | 1.30853E-06 | 0.000534698 | 1.17519E-06 | -0.388852883 | -0.193918057 | TANGO2           |
| chr5  | 141345793 | 141346577 | 785  | * | 4 | 4.48195E-17 | 0.052868853 | 0.000535054 | 0.00463425  | -0.284365122 | -0.090973265 | RNF14, PCDH12    |
| chr1  | 35915171  | 35915735  | 565  | * | 2 | 8.50278E-17 | 0.000116322 | 0.000536607 | 0.000135811 | -0.4266424   | -0.263597376 | KIAA0319L        |
| chr5  | 72131020  | 72131603  | 584  | * | 2 | 1.06851E-16 | 7.74653E-06 | 0.000537175 | 1.61442E-05 | -0.37088122  | -0.116051409 | TNPO1            |
| chr3  | 194867333 | 194868507 | 1175 | * | 6 | 4.86076E-35 | 0.002003188 | 0.00053721  | 4.53728E-05 | 0.161438093  | 0.034875709  | XXYLT1, RN7SL36P |
| chr8  | 128048285 | 128048403 | 119  | * | 2 | 4.39694E-12 | 0.004511275 | 0.000537788 | 0.001111153 | -0.400479351 | -0.206711949 |                  |
| chr1  | 27157564  | 27158887  | 1324 | * | 5 | 1.80112E-34 | 0.000648772 | 0.000540498 | 6.28375E-07 | -0.241111323 | -0.128143864 | ZDHHC18          |
| chr18 | 77442923  | 77443784  | 862  | * | 3 | 4.95374E-21 | 9.96295E-08 | 0.000541318 | 3.71591E-07 | -0.267235668 | -0.196794284 | CTDP1            |
| chr8  | 97632763  | 97632845  | 83   | * | 2 | 3.09917E-12 | 0.048679043 | 0.000542167 | 0.002200535 | -0.30299816  | -0.148596193 |                  |

|       |           |           |      |   |    |             |             |             |             |              |              |                            |
|-------|-----------|-----------|------|---|----|-------------|-------------|-------------|-------------|--------------|--------------|----------------------------|
| chr17 | 38261988  | 38262482  | 495  | * | 2  | 1.35433E-13 | 0.009593271 | 0.00054518  | 0.001489487 | -0.349322953 | -0.164400125 |                            |
| chr19 | 4950746   | 4950888   | 143  | * | 2  | 3.93108E-14 | 0.000103522 | 0.000546031 | 0.000125793 | -0.372095082 | -0.222427592 | UHRF1                      |
| chr4  | 84071170  | 84071797  | 628  | * | 3  | 2.52448E-24 | 4.28296E-08 | 0.000546281 | 1.98576E-07 | -0.31955592  | -0.226425188 |                            |
| chr13 | 110350436 | 110350537 | 102  | * | 2  | 4.81142E-18 | 2.0183E-06  | 0.000546415 | 4.96623E-06 | 0.205278652  | 0.20212268   |                            |
| chr3  | 141994724 | 141996258 | 1535 | * | 3  | 1.04008E-17 | 0.000471813 | 0.000547764 | 7.58647E-05 | -0.217384923 | -0.1026466   |                            |
| chr5  | 149318703 | 149320352 | 1650 | * | 6  | 2.3107E-34  | 6.26999E-08 | 0.000548789 | 2.1272E-08  | -0.362270472 | -0.170564856 | PDE6A, Y_RNA               |
| chr16 | 54114317  | 54115019  | 703  | * | 3  | 7.10097E-16 | 0.036986704 | 0.000550704 | 0.002892086 | -0.306570463 | -0.120894667 | FTO                        |
| chr14 | 104393559 | 104393771 | 213  | * | 3  | 8.71954E-16 | 0.111740717 | 0.000550708 | 0.004218918 | 0.165727635  | 0.050051511  | C14orf2                    |
| chr3  | 197272311 | 197272328 | 18   | * | 2  | 4.71384E-18 | 2.01433E-06 | 0.000554178 | 4.96669E-06 | -0.316323063 | -0.294588096 | BDH1                       |
| chr8  | 108343968 | 108344200 | 233  | * | 2  | 5.62239E-18 | 2.03802E-06 | 0.000554318 | 5.01956E-06 | -0.31312115  | -0.22587896  | ANGPT1                     |
| chr15 | 42022754  | 42023104  | 351  | * | 2  | 3.52708E-16 | 4.56802E-05 | 0.00055458  | 6.88022E-05 | -0.263207641 | -0.194995319 | MGA                        |
| chr17 | 14651102  | 14651898  | 797  | * | 2  | 3.37669E-14 | 2.01306E-06 | 0.000557059 | 4.96723E-06 | -0.306719322 | -0.305350736 |                            |
| chr3  | 10247112  | 10247487  | 376  | * | 2  | 2.83238E-13 | 0.02086011  | 0.000557074 | 0.001899932 | -0.247702666 | -0.131271278 | IRAK2                      |
| chr9  | 84228185  | 84228672  | 488  | * | 2  | 1.56218E-13 | 0.047559935 | 0.000557111 | 0.002242963 | -0.267700948 | -0.130087855 | TLE1                       |
| chr2  | 111751981 | 111752234 | 254  | * | 2  | 5.28426E-12 | 0.034237435 | 0.000557208 | 0.002119316 | -0.216552154 | -0.103601037 | ACOXL                      |
| chr8  | 144437314 | 144438377 | 1064 | * | 6  | 4.86519E-30 | 1.40589E-05 | 0.000557882 | 1.45655E-05 | -0.280170493 | -0.109189404 | TOP1MT                     |
| chr9  | 81760592  | 81761043  | 452  | * | 3  | 1.78803E-21 | 0.000278962 | 0.000558319 | 1.6E-05     | -0.384269519 | -0.241207136 |                            |
| chr18 | 60119693  | 60119756  | 64   | * | 3  | 5.78738E-27 | 1.24566E-08 | 0.000559261 | 6.96275E-08 | -0.270723852 | -0.210765886 |                            |
| chr16 | 85946351  | 85947866  | 1516 | * | 8  | 2.28536E-38 | 8.93196E-10 | 0.000560185 | 7.58923E-10 | -0.300881671 | -0.12182413  | IRF8                       |
| chr2  | 44334601  | 44335362  | 762  | * | 2  | 4.39288E-15 | 3.08659E-05 | 0.000560366 | 5.0853E-05  | -0.248641894 | -0.067478287 |                            |
| chr11 | 19298660  | 19298668  | 9    | * | 2  | 5.50227E-18 | 2.13569E-06 | 0.000561032 | 5.24456E-06 | -0.275504951 | -0.244397019 | RP11-428C19.4              |
| chr3  | 52502445  | 52502766  | 322  | * | 2  | 1.46027E-14 | 0.00052872  | 0.000561107 | 0.000377097 | -0.251303149 | -0.140251118 | NISCH                      |
| chr2  | 231582109 | 231582349 | 241  | * | 2  | 7.05566E-13 | 0.005452598 | 0.000562078 | 0.00123692  | -0.236091184 | -0.146056007 | CAB39                      |
| chr19 | 5669474   | 5669909   | 436  | * | 2  | 3.29504E-13 | 0.006820725 | 0.000562111 | 0.001348736 | -0.385757963 | -0.201345795 |                            |
| chr2  | 66723102  | 66723348  | 247  | * | 2  | 3.09603E-12 | 0.066832336 | 0.000562263 | 0.002367617 | 0.175590206  | 0.083481497  | MEIS1                      |
| chr6  | 28884599  | 28888395  | 3797 | * | 15 | 3.99816E-41 | 0.002909852 | 0.000564572 | 3.37453E-09 | -0.369042976 | -0.102730527 | TRIM27                     |
| chr3  | 12392024  | 12393021  | 998  | * | 4  | 3.87924E-25 | 2.17315E-06 | 0.000564798 | 3.35869E-07 | -0.329889218 | -0.226315734 | PPARG                      |
| chr22 | 50980910  | 50981406  | 497  | * | 4  | 4.29988E-34 | 8.50236E-11 | 0.000564931 | 1.05467E-09 | -0.349215186 | -0.314620297 | CTA-384D8.34, CTA-384D8.35 |
| chr12 | 11840863  | 11841125  | 263  | * | 2  | 2.43268E-12 | 0.004940316 | 0.000566432 | 0.001194879 | 0.138904761  | 0.081450176  | ETV6                       |

|       |           |           |      |   |    |             |             |             |             |              |              |                            |
|-------|-----------|-----------|------|---|----|-------------|-------------|-------------|-------------|--------------|--------------|----------------------------|
| chr10 | 75676660  | 75677011  | 352  | * | 3  | 2.27606E-25 | 1.81187E-08 | 0.00056804  | 9.69467E-08 | -0.223975072 | -0.18782708  | PLAU, C10orf55             |
| chr18 | 24269574  | 24270091  | 518  | * | 5  | 2.98948E-26 | 0.002053315 | 0.000568703 | 7.42004E-05 | -0.307231045 | -0.125388751 | AQP4-AS1, RP11-17A19.2, U3 |
| chr7  | 148317765 | 148318131 | 367  | * | 2  | 1.8044E-12  | 0.173874522 | 0.000569224 | 0.002569198 | 0.172327129  | 0.086758105  |                            |
| chr12 | 125201256 | 125201577 | 322  | * | 3  | 1.23586E-20 | 7.42096E-05 | 0.000569627 | 1.29588E-05 | -0.238249005 | -0.155886662 |                            |
| chr9  | 131463631 | 131463936 | 306  | * | 2  | 8.57296E-15 | 0.003402077 | 0.000570867 | 0.001023737 | -0.127876985 | -0.072428273 |                            |
| chr15 | 67125242  | 67125879  | 638  | * | 2  | 3.16479E-15 | 6.18811E-05 | 0.000571403 | 8.75368E-05 | -0.170672123 | -0.133393672 |                            |
| chr21 | 40694070  | 40694407  | 338  | * | 2  | 3.19252E-13 | 0.008980775 | 0.000572563 | 0.001508925 | -0.310707553 | -0.144995146 | BRWD1-AS1                  |
| chr10 | 104216121 | 104216266 | 146  | * | 3  | 3.80996E-20 | 1.33702E-05 | 0.000572749 | 8.15488E-06 | -0.358571345 | -0.181831352 | RP11-18114.10              |
| chr20 | 39135432  | 39135472  | 41   | * | 3  | 3.23071E-20 | 1.83624E-06 | 0.000572833 | 4.03028E-06 | -0.11208028  | -0.065919648 |                            |
| chr17 | 591717    | 591826    | 110  | * | 2  | 4.94991E-13 | 0.000320678 | 0.000574341 | 0.000278555 | -0.319545379 | -0.174374677 | VPS53                      |
| chr1  | 56973115  | 56974060  | 946  | * | 2  | 1.87064E-15 | 0.024942685 | 0.000574673 | 0.002032118 | -0.400113059 | -0.197315436 | PPAP2B                     |
| chr3  | 69130853  | 69130918  | 66   | * | 2  | 1.55129E-17 | 1.09135E-05 | 0.000575341 | 2.19043E-05 | 0.199506238  | 0.150160871  |                            |
| chr13 | 31256334  | 31256790  | 457  | * | 3  | 6.21287E-14 | 0.112990359 | 0.000575553 | 0.005774674 | -0.295747127 | -0.111242731 |                            |
| chr18 | 60710837  | 60710970  | 134  | * | 2  | 6.18768E-12 | 0.004655517 | 0.000575926 | 0.001179051 | -0.328895391 | -0.15592132  |                            |
| chr8  | 38259567  | 38259904  | 338  | * | 2  | 2.37151E-15 | 0.01120858  | 0.00057605  | 0.001632073 | -0.357281628 | -0.182717316 | LETM2                      |
| chr2  | 69811375  | 69811847  | 473  | * | 3  | 1.86924E-19 | 3.5441E-06  | 0.000576071 | 8.72654E-06 | -0.312704907 | -0.207827584 | AAK1                       |
| chr12 | 4698603   | 4699618   | 1016 | * | 4  | 1.13866E-29 | 5.11917E-07 | 0.000576955 | 1.26895E-07 | -0.418543361 | -0.252445033 | DYRK4                      |
| chr2  | 32489693  | 32491644  | 1952 | * | 10 | 4.16848E-61 | 1.02648E-11 | 0.000578765 | 1.06557E-11 | -0.457100137 | -0.186044438 | NLRC4                      |
| chr7  | 151620691 | 151620888 | 198  | * | 2  | 1.26205E-12 | 0.000958804 | 0.000578792 | 0.000543284 | -0.249384062 | -0.141921281 |                            |
| chr8  | 74224899  | 74225117  | 219  | * | 2  | 7.96843E-13 | 0.00074079  | 0.000579479 | 0.000468824 | -0.311390265 | -0.189267526 | RDH10, RP11-434I12.2       |
| chr7  | 39740448  | 39740780  | 333  | * | 2  | 2.95977E-13 | 0.023847258 | 0.000579528 | 0.002024366 | -0.272440834 | -0.141419491 | RALA, AC004837.5           |
| chr18 | 9658035   | 9658170   | 136  | * | 2  | 1.404E-11   | 0.009124997 | 0.000580183 | 0.001531761 | -0.405760926 | -0.211892201 |                            |
| chr17 | 36571512  | 36572011  | 500  | * | 3  | 1.09282E-16 | 0.000369717 | 0.000582338 | 0.000133582 | -0.273604061 | -0.133204362 |                            |
| chr5  | 100115478 | 100115829 | 352  | * | 2  | 9.91743E-13 | 0.003760045 | 0.000584736 | 0.001086925 | -0.346702739 | -0.181605715 |                            |
| chr9  | 134207932 | 134208328 | 397  | * | 2  | 1.59694E-12 | 0.078001829 | 0.000587016 | 0.002498741 | 0.223167657  | 0.110735712  |                            |
| chr14 | 90440238  | 90441059  | 822  | * | 3  | 4.93364E-23 | 6.64527E-05 | 0.000587019 | 1.46559E-05 | -0.362710552 | -0.232372055 | TDP1                       |
| chr16 | 56892074  | 56892460  | 387  | * | 2  | 6.38232E-13 | 0.016380151 | 0.000587554 | 0.001856985 | -0.326700625 | -0.154497411 | MIR138-2                   |
| chr9  | 130603515 | 130603995 | 481  | * | 3  | 1.75612E-14 | 0.007750095 | 0.000588569 | 0.00169197  | 0.179804094  | 0.073850413  | ENG                        |
| chr6  | 341180    | 341625    | 446  | * | 3  | 3.64861E-19 | 0.000594918 | 0.000589959 | 5.28402E-05 | -0.281343057 | -0.08469842  | DUSP22                     |

|       |           |           |      |   |   |             |             |             |             |              |              |                             |
|-------|-----------|-----------|------|---|---|-------------|-------------|-------------|-------------|--------------|--------------|-----------------------------|
| chr16 | 84377124  | 84377912  | 789  | * | 3 | 6.6328E-23  | 1.23557E-07 | 0.000592166 | 4.95965E-07 | -0.390185471 | -0.189654635 |                             |
| chr5  | 142527658 | 142528481 | 824  | * | 2 | 1.22181E-14 | 5.07047E-06 | 0.000593659 | 1.14102E-05 | -0.257545869 | -0.205953434 | ARHGAP26                    |
| chr2  | 64450285  | 64450561  | 277  | * | 2 | 9.1623E-16  | 1.50776E-05 | 0.000593943 | 2.89075E-05 | -0.348718745 | -0.277210601 | ACO74289.1                  |
| chr11 | 58991197  | 58991803  | 607  | * | 2 | 2.24211E-14 | 0.013519758 | 0.000594003 | 0.001770398 | -0.342950513 | -0.163092089 |                             |
| chr10 | 13812071  | 13812323  | 253  | * | 4 | 1.21956E-22 | 0.001067407 | 0.000594117 | 1.64881E-05 | -0.282478717 | -0.160523893 | FRMD4A                      |
| chr4  | 15080890  | 15081163  | 274  | * | 2 | 3.37724E-17 | 3.52956E-06 | 0.000594771 | 8.29276E-06 | -0.230876176 | -0.212755286 | RP11-665G4.1                |
| chr5  | 54916621  | 54917216  | 596  | * | 2 | 2.27008E-16 | 2.6017E-06  | 0.000594989 | 6.31486E-06 | -0.29766841  | -0.250031915 |                             |
| chr9  | 126065063 | 126065710 | 648  | * | 4 | 9.96069E-29 | 2.39944E-05 | 0.000595236 | 4.31692E-07 | 0.18335103   | 0.1065747    |                             |
| chr9  | 139795523 | 139796368 | 846  | * | 5 | 1.44155E-29 | 0.000953738 | 0.000596213 | 2.64953E-05 | -0.289012078 | -0.086337285 | TRAF2                       |
| chr5  | 86707074  | 86707303  | 230  | * | 2 | 1.15474E-12 | 0.006718433 | 0.000596307 | 0.001397442 | -0.372659325 | -0.211157167 | CCNH                        |
| chr11 | 47517145  | 47517381  | 237  | * | 2 | 1.84398E-13 | 0.015932407 | 0.00059641  | 0.001863584 | -0.392584147 | -0.18492754  | CELF1                       |
| chr9  | 127117328 | 127117813 | 486  | * | 2 | 3.97586E-13 | 0.063464297 | 0.000596484 | 0.00247332  | -0.415024297 | -0.208594188 | PSMB7                       |
| chr17 | 9802783   | 9803389   | 607  | * | 4 | 6.70627E-33 | 4.27261E-10 | 0.000597566 | 4.0311E-09  | -0.344447032 | -0.241632077 | RCVRN                       |
| chr5  | 158654243 | 158654655 | 413  | * | 2 | 2.07401E-14 | 0.169834361 | 0.0005997   | 0.002687489 | -0.343860488 | -0.171350234 | CTB-11I22.1                 |
| chr7  | 104771546 | 104771554 | 9    | * | 2 | 2.61883E-17 | 7.2028E-06  | 0.00059998  | 1.5508E-05  | 0.162599856  | 0.142125949  | SRPK2                       |
| chr13 | 114263342 | 114264438 | 1097 | * | 4 | 1.40221E-28 | 4.83731E-07 | 0.00060019  | 3.42943E-07 | -0.353426083 | -0.174339793 | TFDP1                       |
| chr13 | 99969116  | 99969273  | 158  | * | 2 | 1.10607E-11 | 0.010028827 | 0.000600715 | 0.001622203 | -0.28229362  | -0.133253123 | UBAC2                       |
| chr1  | 155620312 | 155620728 | 417  | * | 2 | 8.92339E-13 | 0.007914865 | 0.000601244 | 0.001493938 | -0.297626125 | -0.153725734 | MSTO1, MSTO2P, RP11-29H23.5 |
| chr15 | 67492223  | 67492541  | 319  | * | 2 | 8.11915E-13 | 0.045368296 | 0.000601388 | 0.002371882 | -0.25544116  | -0.124643502 |                             |
| chr14 | 77417199  | 77417243  | 45   | * | 2 | 5.40141E-15 | 2.10488E-05 | 0.000603128 | 3.81734E-05 | -0.223299315 | -0.183883422 |                             |
| chr14 | 89774031  | 89774948  | 918  | * | 3 | 7.81306E-17 | 1.25356E-06 | 0.000604788 | 2.7654E-06  | -0.197135684 | 0.018449807  | FOXN3                       |
| chr1  | 2076496   | 2076778   | 283  | * | 2 | 1.17725E-13 | 0.205628112 | 0.000606584 | 0.002732159 | -0.204820217 | -0.101735967 | PRKCZ, RP5-892K4.1          |
| chr10 | 126359887 | 126360266 | 380  | * | 2 | 3.25162E-15 | 4.41537E-05 | 0.000607189 | 6.89647E-05 | -0.360423494 | -0.215775641 | RP11-12J10.3, FAM53B        |
| chr1  | 6419608   | 6419767   | 160  | * | 2 | 6.56401E-19 | 0.000230898 | 0.000607442 | 0.00022985  | 0.16758379   | 0.128878192  | ACOT7                       |
| chr8  | 37967091  | 37967201  | 111  | * | 2 | 1.74036E-19 | 2.5035E-06  | 0.0006081   | 6.11824E-06 | -0.315053291 | -0.294320493 | ASH2L                       |
| chr4  | 108749402 | 108749432 | 31   | * | 2 | 3.08456E-11 | 0.009228116 | 0.000608442 | 0.001591212 | -0.345062718 | -0.192888443 | SGMS2                       |
| chr17 | 80832328  | 80834228  | 1901 | * | 9 | 6.57646E-52 | 9.43065E-08 | 0.000608934 | 1.7169E-10  | -0.374256953 | -0.179564081 | TBCD                        |
| chr7  | 100885251 | 100885706 | 456  | * | 2 | 3.59067E-14 | 0.032263905 | 0.000608985 | 0.002250719 | -0.193712044 | -0.102774291 | FIS1                        |
| chr20 | 44597685  | 44598468  | 784  | * | 2 | 1.39684E-15 | 0.009345983 | 0.000609521 | 0.001600271 | -0.290411551 | -0.133524518 | ZNF335                      |

|       |           |           |      |   |   |             |             |             |             |              |              |                                   |
|-------|-----------|-----------|------|---|---|-------------|-------------|-------------|-------------|--------------|--------------|-----------------------------------|
| chr12 | 132274349 | 132274355 | 7    | * | 2 | 1.08685E-11 | 0.013817863 | 0.000609567 | 0.001816916 | -0.302553515 | -0.164985633 | SFSWAP                            |
| chr17 | 62168737  | 62169667  | 931  | * | 2 | 2.20836E-12 | 2.39212E-06 | 0.000609633 | 5.87424E-06 | -0.348997483 | -0.109671531 | ERN1                              |
| chr2  | 206853238 | 206853388 | 151  | * | 2 | 3.84634E-12 | 0.019011754 | 0.000609827 | 0.001990003 | -0.200465492 | -0.103319167 |                                   |
| chr15 | 29285352  | 29285727  | 376  | * | 2 | 2.20657E-12 | 0.034319906 | 0.000610602 | 0.002283643 | 0.14800283   | 0.070238183  | APBA2                             |
| chr20 | 49041703  | 49042109  | 407  | * | 2 | 2.18357E-12 | 0.109727715 | 0.000610654 | 0.00266467  | -0.233492287 | -0.115885343 |                                   |
| chr7  | 50252529  | 50253138  | 610  | * | 2 | 6.19336E-16 | 3.68683E-05 | 0.000611976 | 6.0041E-05  | -0.145017229 | -0.102227558 |                                   |
| chr7  | 37298864  | 37299382  | 519  | * | 4 | 9.59116E-27 | 1.84346E-05 | 0.000613135 | 1.27454E-06 | -0.185700057 | -0.109968391 | ELMO1                             |
| chr8  | 21769695  | 21771059  | 1365 | * | 5 | 3.06605E-29 | 0.002849256 | 0.000613868 | 0.000127153 | 0.194560246  | 0.069328065  | DOK2                              |
| chr7  | 137775104 | 137776547 | 1444 | * | 5 | 6.07441E-27 | 0.011558665 | 0.000613913 | 9.3966E-05  | -0.282844635 | -0.102855086 | AKR1D1, RN7SKP223                 |
| chr9  | 112889386 | 112890072 | 687  | * | 3 | 1.81812E-21 | 1.33506E-06 | 0.000614643 | 3.59786E-06 | -0.317063512 | -0.205299271 | PALM2-AKAP2, AKAP2                |
| chr13 | 46679079  | 46679242  | 164  | * | 3 | 3.85144E-13 | 0.048845219 | 0.00061465  | 0.003641228 | -0.319154188 | -0.114182803 | CPB2-AS1, CPB2                    |
| chr5  | 39215190  | 39215507  | 318  | * | 2 | 4.49477E-14 | 0.000117491 | 0.000617182 | 0.000144363 | -0.289035273 | -0.076091802 | FYB                               |
| chr1  | 114429815 | 114430786 | 972  | * | 5 | 4.1702E-27  | 1.95306E-05 | 0.000619155 | 1.93208E-05 | -0.310554457 | -0.107752418 | AP4B1-AS1, BCL2L15                |
| chr3  | 186742897 | 186743256 | 360  | * | 2 | 1.82484E-14 | 0.00208585  | 0.000620415 | 0.000855082 | 0.111339972  | 0.015363399  | ST6GAL1                           |
| chr8  | 38205729  | 38206041  | 313  | * | 2 | 3.83937E-12 | 0.135303141 | 0.000620683 | 0.002739799 | -0.352775692 | -0.175736795 | WHSC1L1                           |
| chr2  | 37422644  | 37422917  | 274  | * | 2 | 1.26784E-16 | 0.006918549 | 0.000620739 | 0.001453121 | -0.334494425 | -0.148665724 | SULT6B1                           |
| chr7  | 139865374 | 139865794 | 421  | * | 2 | 2.05741E-12 | 0.063133071 | 0.000620929 | 0.002556832 | -0.323126343 | -0.163854212 | KDM7A                             |
| chr17 | 25886248  | 25887224  | 977  | * | 6 | 3.76097E-35 | 1.10317E-10 | 0.000621744 | 1.85302E-10 | -0.327358808 | -0.190332088 | KSR1                              |
| chr12 | 1949503   | 1949586   | 84   | * | 2 | 5.22348E-14 | 0.00120297  | 0.000621911 | 0.000641286 | -0.155821634 | -0.09302951  | CACNA2D4                          |
| chr10 | 80059603  | 80059610  | 8    | * | 2 | 5.45168E-14 | 5.37645E-05 | 0.000622038 | 8.0903E-05  | -0.129239746 | -0.124124226 | LINC00856, LINC00595, RP11-90J7.2 |
| chr9  | 2156196   | 2157105   | 910  | * | 3 | 1.46845E-17 | 0.000583792 | 0.0006229   | 0.000213621 | -0.304203684 | -0.154887654 | SMARCA2                           |
| chr20 | 43882990  | 43884219  | 1230 | * | 8 | 7.64094E-50 | 4.70545E-12 | 0.000624008 | 1.60769E-12 | -0.330036056 | -0.148006992 | SLPI                              |
| chr16 | 2043558   | 2044230   | 673  | * | 3 | 2.19466E-15 | 0.016131874 | 0.00062484  | 0.002056776 | -0.164323551 | -0.063341711 | SYNGR3                            |
| chr13 | 37011756  | 37011966  | 211  | * | 2 | 8.42414E-13 | 0.025496335 | 0.000624971 | 0.0021825   | -0.390565898 | -0.187530255 | CCNA1                             |
| chr4  | 77137900  | 77138258  | 359  | * | 3 | 1.20632E-17 | 3.24506E-05 | 0.000627254 | 4.49147E-05 | -0.20111571  | -0.059074445 | FAM47E                            |
| chr15 | 72468522  | 72469006  | 485  | * | 3 | 5.35538E-17 | 0.000696522 | 0.000627359 | 0.000442912 | 0.220216906  | 0.102328227  | GRAMD2                            |
| chr3  | 195106412 | 195106547 | 136  | * | 2 | 2.3181E-16  | 5.77086E-06 | 0.000627768 | 1.29025E-05 | -0.197399352 | -0.19493602  | ACAP2                             |
| chr1  | 44798857  | 44799317  | 461  | * | 4 | 1.29371E-15 | 0.111418895 | 0.000628379 | 0.006049683 | -0.302222407 | -0.086245986 | ERI3                              |
| chr2  | 10860366  | 10860952  | 587  | * | 2 | 1.04098E-16 | 0.22997362  | 0.000628547 | 0.002827444 | -0.134365783 | -0.066746393 | AC092687.3                        |

|       |           |           |      |   |   |             |             |             |             |              |              |                       |
|-------|-----------|-----------|------|---|---|-------------|-------------|-------------|-------------|--------------|--------------|-----------------------|
| chr12 | 15409818  | 15409872  | 55   | * | 2 | 4.43876E-13 | 0.000652143 | 0.000628604 | 0.00045338  | -0.320402624 | -0.18463492  | RERG                  |
| chr1  | 243641182 | 243641454 | 273  | * | 2 | 9.96768E-12 | 0.012815012 | 0.000629804 | 0.001818903 | -0.3154842   | -0.164237345 | SDCCAG8               |
| chr5  | 151132418 | 151132702 | 285  | * | 2 | 1.44375E-15 | 0.002869026 | 0.00063137  | 0.00100918  | -0.398161635 | -0.209817391 | ATOX1                 |
| chr11 | 44896984  | 44897089  | 106  | * | 2 | 1.11619E-17 | 2.61818E-06 | 0.000631427 | 6.40267E-06 | -0.273371398 | -0.214096198 | TSPAN18               |
| chr1  | 150277456 | 150278094 | 639  | * | 3 | 3.19965E-14 | 0.013783536 | 0.000633209 | 0.00250051  | -0.166589797 | -0.046882322 | MRPS21                |
| chr2  | 36757828  | 36758130  | 303  | * | 3 | 2.29452E-13 | 0.020129182 | 0.000633293 | 0.003079493 | -0.281227598 | -0.100596391 | CRIM1                 |
| chr4  | 1294432   | 1295078   | 647  | * | 8 | 7.13516E-58 | 6.24199E-16 | 0.000634088 | 9.68886E-15 | -0.372407198 | -0.27575369  | MAEA                  |
| chr14 | 25045028  | 25046267  | 1240 | * | 7 | 3.09669E-43 | 2.05313E-09 | 0.000634891 | 1.98577E-10 | -0.365403015 | -0.226756856 | CTSG                  |
| chr17 | 56352875  | 56352895  | 21   | * | 2 | 3.52122E-17 | 2.92151E-06 | 0.000635751 | 7.07295E-06 | -0.29440368  | -0.276414311 | MPO                   |
| chr19 | 15698550  | 15699028  | 479  | * | 2 | 2.70575E-15 | 2.95292E-05 | 0.000637591 | 5.09356E-05 | -0.301174981 | -0.237790002 |                       |
| chr11 | 128333168 | 128333573 | 406  | * | 2 | 3.01025E-13 | 0.008566116 | 0.000640156 | 0.001607071 | 0.17464549   | 0.094286111  | ETS1                  |
| chr1  | 197433283 | 197433347 | 65   | * | 2 | 2.84703E-17 | 3.12561E-06 | 0.000641483 | 7.52426E-06 | -0.272391736 | -0.231690285 | CRB1                  |
| chr14 | 56264322  | 56264651  | 330  | * | 3 | 2.30973E-20 | 3.99512E-06 | 0.000642403 | 5.64365E-06 | 0.219589599  | 0.091809804  |                       |
| chr14 | 71608659  | 71609158  | 500  | * | 2 | 1.3507E-16  | 3.04587E-06 | 0.000645057 | 7.35763E-06 | -0.255420811 | -0.195121622 | RP6-91H8.3            |
| chr14 | 64933763  | 64933964  | 202  | * | 2 | 3.96832E-14 | 0.000270577 | 0.000647876 | 0.000262949 | -0.365967043 | -0.238008429 | AKAP5, ZBTB25         |
| chr21 | 34431089  | 34431807  | 719  | * | 4 | 6.04775E-22 | 0.021090836 | 0.000648771 | 7.95986E-05 | -0.314446176 | -0.154020246 | LINC00945, AP000282.2 |
| chr8  | 37730745  | 37730793  | 49   | * | 2 | 1.15256E-11 | 0.007542616 | 0.000650079 | 0.001550381 | -0.19341037  | -0.108450832 | RAB11FIP1             |
| chr14 | 88457175  | 88457365  | 191  | * | 2 | 1.17323E-14 | 0.000213996 | 0.000652003 | 0.000224939 | -0.294588364 | -0.163317386 | GALC                  |
| chr3  | 183260220 | 183260375 | 156  | * | 2 | 1.05035E-12 | 0.0003274   | 0.000653028 | 0.000299387 | 0.198402884  | 0.130257551  | KLHL6                 |
| chr10 | 45958759  | 45959309  | 551  | * | 4 | 3.15106E-33 | 7.47781E-11 | 0.000653654 | 9.73419E-10 | -0.353178206 | -0.292299774 | MARCH8                |
| chr1  | 95260703  | 95261186  | 484  | * | 2 | 1.70449E-12 | 0.060030248 | 0.000655496 | 0.002658039 | -0.34570322  | -0.174055312 | LINC01057             |
| chr1  | 48224130  | 48225077  | 948  | * | 3 | 2.0198E-15  | 0.153623286 | 0.000655863 | 0.00349742  | -0.332089819 | -0.101149155 |                       |
| chr10 | 126790026 | 126790644 | 619  | * | 3 | 4.02141E-15 | 0.018455648 | 0.000656207 | 0.000879737 | -0.402914134 | -0.15733246  | CTBP2                 |
| chr6  | 14758733  | 14759269  | 537  | * | 3 | 4.08317E-21 | 2.15944E-07 | 0.000656524 | 7.28155E-07 | -0.257455885 | -0.18017861  |                       |
| chr16 | 67439320  | 67439511  | 192  | * | 2 | 3.32174E-14 | 0.005000083 | 0.000656619 | 0.001325836 | -0.297299658 | -0.156072383 | ZDHHC1                |
| chr14 | 102676957 | 102677307 | 351  | * | 4 | 1.94218E-32 | 1.36383E-10 | 0.000656988 | 1.63329E-09 | -0.442862536 | -0.32113466  | WDR20                 |
| chr7  | 10980278  | 10981034  | 757  | * | 4 | 1.66394E-25 | 0.082426075 | 0.000657909 | 0.006879472 | 0.116880114  | 0.030933199  | RP5-855F16.1          |
| chr7  | 44145110  | 44145333  | 224  | * | 2 | 1.57417E-13 | 0.026403428 | 0.000658233 | 0.002292221 | -0.090875876 | -0.030910951 | AEBP1                 |
| chr22 | 27671465  | 27672129  | 665  | * | 4 | 8.96468E-25 | 0.000905224 | 0.000659064 | 4.56529E-05 | -0.27258887  | -0.108489164 |                       |

|       |           |           |      |   |    |             |             |             |             |              |              |                           |
|-------|-----------|-----------|------|---|----|-------------|-------------|-------------|-------------|--------------|--------------|---------------------------|
| chr8  | 123859056 | 123859953 | 898  | * | 4  | 7.3355E-18  | 0.056906344 | 0.000659254 | 0.002643974 | -0.28399669  | -0.087967556 | ZHX2                      |
| chr1  | 76250734  | 76250742  | 9    | * | 2  | 2.01536E-16 | 0.000582455 | 0.00066061  | 0.000433989 | -0.371283991 | -0.218873366 | ACADM                     |
| chr17 | 75537017  | 75537444  | 428  | * | 3  | 1.35026E-19 | 0.004427355 | 0.000660889 | 3.49934E-05 | 0.187365512  | 0.112570177  |                           |
| chr1  | 35920054  | 35920411  | 358  | * | 3  | 1.41574E-21 | 4.38415E-07 | 0.000661282 | 1.31541E-06 | -0.378617435 | -0.239401685 | KIAA0319L                 |
| chr8  | 71128925  | 71129750  | 826  | * | 3  | 4.03509E-14 | 0.078138117 | 0.000661448 | 0.005547658 | -0.126967428 | -0.048492235 | NCOA2                     |
| chr7  | 107202516 | 107203448 | 933  | * | 3  | 7.08369E-17 | 0.037262805 | 0.000662841 | 0.004073192 | -0.319071511 | -0.113149586 | COG5                      |
| chr19 | 40728255  | 40728617  | 363  | * | 2  | 1.61118E-14 | 0.061653464 | 0.000663292 | 0.002694304 | 0.196370062  | 0.101597922  | CNTD2                     |
| chr15 | 65167336  | 65168143  | 808  | * | 2  | 7.69834E-14 | 9.94321E-05 | 0.00066428  | 0.000131365 | 0.186727741  | 0.040290163  | AC069368.3                |
| chr5  | 49739158  | 49739641  | 484  | * | 2  | 2.64001E-14 | 0.000251157 | 0.000664467 | 0.000252864 | -0.213692249 | -0.167395299 |                           |
| chr11 | 34663205  | 34663681  | 477  | * | 3  | 8.53571E-15 | 0.009695531 | 0.000664775 | 0.001701875 | -0.283248589 | -0.108561148 | EHF                       |
| chr22 | 24992578  | 24992604  | 27   | * | 2  | 7.7179E-17  | 3.36883E-06 | 0.00066561  | 8.08928E-06 | -0.194412463 | -0.185952008 | SNRPD3, GGT1              |
| chr9  | 95497984  | 95498022  | 39   | * | 2  | 5.34519E-12 | 0.000637934 | 0.000665632 | 0.000460509 | 0.150366102  | 0.111537896  | BICD2                     |
| chr11 | 13319763  | 13320237  | 475  | * | 2  | 1.5061E-12  | 0.010877148 | 0.000666553 | 0.001797715 | -0.203037654 | -0.106057623 | ARNTL                     |
| chr2  | 129199624 | 129200109 | 486  | * | 2  | 7.18304E-13 | 0.019373387 | 0.000667092 | 0.002142916 | 0.221878948  | 0.099384862  |                           |
| chr8  | 144623533 | 144625381 | 1849 | * | 10 | 3.4963E-23  | 0.391103871 | 0.000668484 | 0.005851074 | -0.258839281 | -0.009600957 | 7SK, ZC3H3, RP11-661A12.5 |
| chr8  | 101315424 | 101316253 | 830  | * | 8  | 5.54525E-39 | 0.000293636 | 0.000670237 | 2.2521E-07  | -0.356903199 | -0.125669836 | RNF19A                    |
| chr11 | 74974504  | 74975244  | 741  | * | 4  | 3.73408E-23 | 0.000272183 | 0.000670991 | 1.68423E-05 | -0.311130523 | -0.161321825 | ARRB1                     |
| chr8  | 37757546  | 37758453  | 908  | * | 3  | 5.90347E-25 | 7.17769E-07 | 0.000671078 | 2.42495E-06 | -0.217836169 | -0.161504226 |                           |
| chr2  | 169893315 | 169893745 | 431  | * | 2  | 1.14431E-12 | 0.181527063 | 0.000671306 | 0.002975275 | -0.29349321  | -0.147420439 |                           |
| chr3  | 194979346 | 194980397 | 1052 | * | 4  | 1.35923E-19 | 0.002393302 | 0.000672572 | 0.000433111 | -0.403343014 | -0.139688684 | XXYL1                     |
| chr16 | 11682634  | 11682916  | 283  | * | 2  | 2.98717E-15 | 0.000603052 | 0.000672598 | 0.000447306 | -0.113272846 | -0.081342567 | LITAF                     |
| chr5  | 124687070 | 124688089 | 1020 | * | 3  | 1.89428E-16 | 0.036418894 | 0.00067281  | 0.00319372  | -0.254848888 | -0.104932111 |                           |
| chr7  | 150436665 | 150437232 | 568  | * | 2  | 1.57947E-13 | 0.001002321 | 0.000673134 | 0.000604547 | -0.341883174 | -0.15244357  | GIMAP5                    |
| chr20 | 45946271  | 45947895  | 1625 | * | 9  | 3.15644E-42 | 0.000114832 | 0.000675518 | 7.37312E-06 | -0.180743019 | -0.072720879 | AL031666.2, ZMYND8        |
| chr1  | 12240593  | 12241073  | 481  | * | 2  | 1.98616E-16 | 3.0501E-06  | 0.000676969 | 7.41626E-06 | -0.272791377 | -0.250671022 | TNFRSF1B                  |
| chr4  | 56962740  | 56963276  | 537  | * | 2  | 1.09438E-12 | 0.013210641 | 0.000680481 | 0.0019445   | 0.187419265  | 0.087792145  |                           |
| chr15 | 49355609  | 49356663  | 1055 | * | 3  | 2.22649E-19 | 9.19198E-06 | 0.00068303  | 1.1816E-05  | -0.351880156 | -0.155716242 |                           |
| chr8  | 74331668  | 74332829  | 1162 | * | 9  | 8.74986E-36 | 0.035415218 | 0.000683587 | 6.98997E-05 | -0.24712768  | -0.067559272 | STAU2-AS1, STAU2          |
| chr1  | 182764125 | 182765260 | 1136 | * | 3  | 1.861E-19   | 8.13121E-05 | 0.000684556 | 1.8256E-05  | -0.245093767 | -0.141867621 | NPL                       |

|       |           |           |      |   |    |             |             |             |             |              |              |                                        |
|-------|-----------|-----------|------|---|----|-------------|-------------|-------------|-------------|--------------|--------------|----------------------------------------|
| chr17 | 71190894  | 71191193  | 300  | * | 2  | 8.01999E-13 | 0.000454169 | 0.000684653 | 0.000378014 | -0.211841795 | -0.129588998 | RP11-143K11.5, COG1                    |
| chr10 | 82362642  | 82363434  | 793  | * | 6  | 2.66306E-19 | 0.201149028 | 0.000685102 | 0.002467965 | -0.155053815 | -0.0523126   | SH2D4B                                 |
| chr15 | 90368716  | 90369040  | 325  | * | 2  | 3.83024E-17 | 1.11859E-05 | 0.000685152 | 2.32231E-05 | -0.216743837 | -0.186246931 |                                        |
| chr8  | 28908912  | 28909794  | 883  | * | 3  | 3.47061E-17 | 4.26311E-06 | 0.000686578 | 6.74571E-06 | 0.161663325  | 0.069510698  | HMBX1                                  |
| chr11 | 116684684 | 116685586 | 903  | * | 5  | 1.0243E-25  | 0.000119917 | 0.000686679 | 2.23945E-05 | -0.38986147  | -0.130539479 | AP006216.5                             |
| chr2  | 42165157  | 42165504  | 348  | * | 2  | 8.83627E-13 | 0.032285168 | 0.000686768 | 0.002479083 | 0.225249345  | 0.109370681  | C2orf91                                |
| chr6  | 3025064   | 3026244   | 1181 | * | 3  | 2.76368E-15 | 1.34766E-07 | 0.000686888 | 5.52099E-07 | -0.200219864 | -0.15346357  | RP1-90J20.11                           |
| chr10 | 99168386  | 99168651  | 266  | * | 3  | 2.87637E-25 | 1.55555E-08 | 0.000691556 | 8.82653E-08 | -0.331550221 | -0.292278621 | RP11-452K12.7                          |
| chr2  | 47197798  | 47198044  | 247  | * | 2  | 8.6008E-15  | 2.35282E-05 | 0.00069182  | 4.33091E-05 | -0.284477812 | -0.198671542 | TTC7A                                  |
| chr6  | 135516912 | 135518423 | 1512 | * | 6  | 3.79944E-21 | 3.26382E-05 | 0.00069215  | 2.68281E-06 | -0.33558866  | -0.152437941 | MYB, MYB-AS1                           |
| chr17 | 7529693   | 7530477   | 785  | * | 2  | 3.79792E-14 | 0.084873675 | 0.00069232  | 0.002902052 | -0.278485559 | -0.137600122 | SHBG, SAT2                             |
| chr5  | 149996672 | 149997694 | 1023 | * | 7  | 2.08797E-20 | 0.204537247 | 0.000692856 | 0.025680288 | -0.30176075  | -0.047105571 | SYNPO                                  |
| chr4  | 174411279 | 174411723 | 445  | * | 2  | 7.16197E-18 | 3.4428E-06  | 0.000692943 | 8.29558E-06 | -0.237394088 | -0.209224434 |                                        |
| chr5  | 138718812 | 138719470 | 659  | * | 5  | 5.59248E-16 | 0.370701638 | 0.000693315 | 0.027353836 | -0.253168258 | -0.05549869  | SLC23A1                                |
| chr14 | 105792505 | 105792853 | 349  | * | 3  | 2.94358E-15 | 0.004069778 | 0.000693436 | 0.00124855  | -0.385401233 | -0.143287228 | PACS2                                  |
| chr6  | 44004565  | 44004688  | 124  | * | 2  | 5.91145E-16 | 1.041E-05   | 0.000695395 | 2.19076E-05 | -0.262619261 | -0.205521495 | RP5-1120P11.1                          |
| chr11 | 134125564 | 134126504 | 941  | * | 6  | 2.81587E-39 | 7.06031E-08 | 0.000696217 | 5.02953E-09 | -0.373956341 | -0.232558943 | ACAD8                                  |
| chr16 | 57864721  | 57865112  | 392  | * | 4  | 1.72172E-13 | 0.137465934 | 0.000697279 | 0.010690448 | -0.161350459 | -0.046332821 | KIFC3                                  |
| chr7  | 1063891   | 1064100   | 210  | * | 2  | 1.42006E-15 | 0.000148472 | 0.000697588 | 0.000178944 | -0.229948408 | -0.160123565 | C7orf50                                |
| chr8  | 117049539 | 117050063 | 525  | * | 2  | 1.10099E-12 | 0.006525794 | 0.000697965 | 0.001539983 | -0.289172541 | -0.127435408 | LINC00536                              |
| chr14 | 65140250  | 65140623  | 374  | * | 2  | 1.9163E-13  | 0.000229995 | 0.000698856 | 0.000243307 | -0.239719636 | -0.153321982 |                                        |
| chr8  | 19539991  | 19540809  | 819  | * | 11 | 8.9835E-71  | 1.74911E-17 | 0.000702317 | 2.10068E-16 | -0.363142128 | -0.199998094 | RP11-1105O14.1, CSGALNACT1             |
| chr22 | 24039722  | 24040094  | 373  | * | 4  | 1.12693E-22 | 2.24233E-05 | 0.000702463 | 5.18443E-06 | -0.308133004 | -0.167394761 | RGL4, GUSBP11, KB-1572G7.2, AP000347.2 |
| chr5  | 32538579  | 32539013  | 435  | * | 2  | 4.40535E-12 | 0.070472074 | 0.000703161 | 0.002879304 | -0.255491611 | -0.125094245 | SUB1                                   |
| chr10 | 118974438 | 118974916 | 479  | * | 2  | 7.57876E-14 | 0.027255056 | 0.000703718 | 0.002434145 | -0.318439623 | -0.167464979 |                                        |
| chr3  | 184297380 | 184297522 | 143  | * | 3  | 9.86857E-14 | 0.001701244 | 0.000704417 | 0.000757232 | -0.285695576 | -0.135998192 | EIF2B5, EPHB3                          |
| chr11 | 110296837 | 110297121 | 285  | * | 3  | 5.08104E-15 | 0.001063275 | 0.000706013 | 0.000368412 | -0.436108845 | -0.175142436 |                                        |
| chr5  | 54275155  | 54275198  | 44   | * | 2  | 1.86026E-12 | 0.000239623 | 0.000706147 | 0.000251328 | -0.27528564  | -0.18747858  | ESM1                                   |
| chr6  | 168495097 | 168495103 | 7    | * | 2  | 1.39451E-10 | 0.045367454 | 0.000708839 | 0.002715534 | -0.13539721  | -0.064486677 |                                        |



|       |           |           |      |   |   |             |             |             |             |              |              |                   |
|-------|-----------|-----------|------|---|---|-------------|-------------|-------------|-------------|--------------|--------------|-------------------|
| chr2  | 46294020  | 46294133  | 114  | * | 2 | 2.65456E-11 | 0.180936095 | 0.000708882 | 0.00312067  | 0.213124021  | 0.107485899  | PRKCE             |
| chr15 | 101746686 | 101748973 | 2288 | * | 5 | 8.95096E-18 | 3.42254E-05 | 0.000709817 | 7.59604E-06 | -0.414657091 | -0.077340675 | CHSY1             |
| chr12 | 69401330  | 69401704  | 375  | * | 2 | 2.90885E-12 | 0.005052153 | 0.000709899 | 0.001402392 | -0.104871016 | -0.062411278 |                   |
| chr17 | 74666659  | 74667276  | 618  | * | 3 | 3.48573E-22 | 1.46836E-05 | 0.000712076 | 1.06176E-05 | -0.233027496 | -0.113633247 |                   |
| chr21 | 45507885  | 45508464  | 580  | * | 4 | 4.36374E-22 | 0.000270627 | 0.000713519 | 2.27825E-05 | -0.376202931 | -0.182804111 | TRAPPC10          |
| chr5  | 14325937  | 14326531  | 595  | * | 5 | 3.11169E-28 | 3.82304E-08 | 0.000714192 | 1.38563E-07 | -0.318228062 | -0.18236578  | TRIO              |
| chr18 | 77195886  | 77196450  | 565  | * | 3 | 1.32141E-18 | 0.000118836 | 0.000714201 | 0.000125192 | 0.211592754  | 0.112209564  | NFATC1            |
| chr8  | 37992045  | 37992521  | 477  | * | 2 | 6.2085E-13  | 0.00108907  | 0.000714793 | 0.000654636 | -0.262216344 | -0.140688623 | ASH2L             |
| chr14 | 24704981  | 24705400  | 420  | * | 2 | 2.63359E-14 | 0.136034376 | 0.000715148 | 0.003100812 | 0.18224157   | 0.093378052  | GMPR2             |
| chr6  | 7402594   | 7403054   | 461  | * | 5 | 5.40989E-17 | 0.326752426 | 0.000715958 | 0.019452857 | -0.289227779 | -0.061333703 | RIOK1             |
| chr6  | 21856149  | 21857295  | 1147 | * | 4 | 3.32854E-26 | 5.17583E-10 | 0.000716778 | 5.34824E-09 | -0.265820689 | -0.218297172 | CASC15            |
| chr11 | 78000703  | 78001599  | 897  | * | 3 | 3.72635E-17 | 6.92778E-06 | 0.000717471 | 1.56503E-05 | -0.263500745 | -0.212168753 | GAB2              |
| chr3  | 128710390 | 128710863 | 474  | * | 3 | 2.31236E-20 | 3.87192E-06 | 0.000717615 | 5.31283E-06 | -0.379602797 | -0.220986814 | KIAA1257          |
| chr8  | 48556931  | 48557420  | 490  | * | 4 | 1.62051E-24 | 5.40426E-05 | 0.000717744 | 2.2948E-06  | -0.379887763 | -0.193668048 | SPIDR             |
| chr2  | 239478365 | 239478514 | 150  | * | 3 | 8.03338E-20 | 1.98016E-06 | 0.000718662 | 3.56918E-06 | -0.245368906 | -0.142125107 |                   |
| chr2  | 103038171 | 103038531 | 361  | * | 2 | 2.45893E-12 | 0.015016643 | 0.000718757 | 0.00210716  | -0.113970729 | -0.049711    | IL18RAP           |
| chr4  | 7647940   | 7649606   | 1667 | * | 6 | 7.96145E-29 | 4.055E-05   | 0.000718844 | 1.94044E-05 | -0.302178476 | -0.107817337 | SORCS2            |
| chr16 | 85577361  | 85578516  | 1156 | * | 4 | 1.36207E-24 | 8.73135E-05 | 0.000720069 | 8.00511E-06 | -0.327826434 | -0.196001266 |                   |
| chr2  | 242801252 | 242802192 | 941  | * | 6 | 7.57196E-30 | 3.10887E-05 | 0.000720301 | 1.88127E-06 | 0.182725552  | 0.093212873  |                   |
| chr9  | 130910995 | 130911792 | 798  | * | 5 | 2.44919E-32 | 2.11811E-05 | 0.000721161 | 6.67897E-07 | -0.240703238 | -0.119716669 | LCN2              |
| chr17 | 1586965   | 1587888   | 924  | * | 3 | 6.59373E-21 | 0.001557035 | 0.000721185 | 0.000782083 | -0.191315325 | -0.070674478 | PRPF8             |
| chr11 | 63618574  | 63619042  | 469  | * | 3 | 4.34798E-14 | 0.195258059 | 0.000722551 | 0.00732811  | 0.229320036  | 0.073228253  | MARK2             |
| chr17 | 48285819  | 48286851  | 1033 | * | 3 | 8.51745E-16 | 0.048093216 | 0.000722685 | 0.003483493 | 0.16187549   | 0.04926519   | RP11-893F2.5      |
| chr11 | 3147616   | 3148731   | 1116 | * | 5 | 2.5886E-32  | 5.35979E-06 | 0.00072331  | 1.77825E-07 | -0.291188161 | -0.158304891 | OSBPL5            |
| chr3  | 127831261 | 127831673 | 413  | * | 3 | 1.40344E-12 | 0.148416758 | 0.000723704 | 0.007406056 | 0.204789691  | 0.062147263  | RUVBL1            |
| chr21 | 34383810  | 34383987  | 178  | * | 2 | 1.26539E-10 | 0.107700416 | 0.000723817 | 0.003081912 | -0.29833008  | -0.147521251 | AP000282.2        |
| chr7  | 38695932  | 38696726  | 795  | * | 2 | 7.06262E-14 | 2.31843E-05 | 0.000726073 | 4.33135E-05 | -0.139271494 | -0.133994247 | KRT8P20           |
| chr16 | 8943122   | 8943436   | 315  | * | 2 | 5.20368E-14 | 0.00791317  | 0.000727639 | 0.001707593 | -0.331642724 | -0.149111545 | PMM2, RP11-77H9.2 |
| chr1  | 35913782  | 35914081  | 300  | * | 3 | 1.75972E-22 | 9.77713E-08 | 0.000728302 | 4.50205E-07 | -0.333592553 | -0.216681597 | KIAA0319L         |

|       |           |           |      |   |   |             |             |             |             |              |              |               |
|-------|-----------|-----------|------|---|---|-------------|-------------|-------------|-------------|--------------|--------------|---------------|
| chr16 | 2576082   | 2576370   | 289  | * | 3 | 5.93841E-21 | 9.73381E-07 | 0.00072966  | 2.68533E-06 | -0.210406322 | -0.170213054 | ATP6C, AMDHD2 |
| chr4  | 124476694 | 124477103 | 410  | * | 3 | 4.43388E-16 | 0.000248377 | 0.000729818 | 0.000226919 | -0.147579381 | -0.093100587 |               |
| chr17 | 80260410  | 80261212  | 803  | * | 3 | 3.52058E-18 | 0.000103378 | 0.000730387 | 5.74088E-05 | 0.217646522  | 0.106649949  |               |
| chr2  | 231731972 | 231732669 | 698  | * | 3 | 9.47024E-16 | 0.002703843 | 0.000731562 | 0.000950905 | -0.174967051 | -0.088419616 | ITM2C         |
| chr2  | 237657127 | 237657200 | 74   | * | 2 | 2.60504E-17 | 4.52493E-06 | 0.000731771 | 1.06756E-05 | -0.264111403 | -0.229856681 | AC011286.1    |
| chr20 | 33222426  | 33222860  | 435  | * | 3 | 3.86225E-20 | 5.28664E-05 | 0.000731994 | 1.90129E-05 | -0.371249906 | -0.245735873 | PIGU          |
| chr5  | 172202805 | 172203421 | 617  | * | 3 | 6.20667E-17 | 0.001759999 | 0.000732297 | 4.50951E-05 | -0.263379767 | -0.160630235 | RP11-779O18.3 |
| chr12 | 57893726  | 57894138  | 413  | * | 2 | 6.50712E-12 | 0.010294973 | 0.000732313 | 0.001887752 | -0.30281951  | -0.165887505 | MARS          |
| chr21 | 39682577  | 39683147  | 571  | * | 3 | 6.43804E-15 | 0.020485036 | 0.000732353 | 0.002313648 | -0.328229706 | -0.110229674 |               |
| chr19 | 33781539  | 33781998  | 460  | * | 3 | 4.85173E-13 | 0.112090805 | 0.000733169 | 0.006554209 | -0.31872651  | -0.09786554  |               |
| chr6  | 131893378 | 131894023 | 646  | * | 4 | 9.38944E-24 | 0.001386316 | 0.000734876 | 6.42306E-05 | -0.387679233 | -0.203708439 |               |
| chr1  | 154237531 | 154238859 | 1329 | * | 6 | 4.77158E-22 | 0.018867905 | 0.000735213 | 0.003132423 | 0.348798184  | 0.055162625  | UBAP2L        |
| chr21 | 30449989  | 30450130  | 142  | * | 2 | 1.04287E-16 | 4.37759E-06 | 0.000735354 | 1.03728E-05 | -0.326968647 | -0.289957714 | MAP3K7CL      |
| chr1  | 25439789  | 25440431  | 643  | * | 4 | 9.64625E-19 | 0.00024355  | 0.000735807 | 3.72508E-05 | -0.210016606 | -0.10038668  |               |
| chr2  | 190522601 | 190523706 | 1106 | * | 4 | 1.5924E-18  | 0.000168656 | 0.000736878 | 0.000162152 | 0.177291904  | 0.045085942  |               |
| chr1  | 109935710 | 109936194 | 485  | * | 2 | 6.83978E-15 | 0.008552198 | 0.000737557 | 0.00177468  | -0.291931361 | -0.172195081 | SORT1         |
| chr5  | 177777391 | 177777704 | 314  | * | 3 | 2.96875E-19 | 0.000102661 | 0.000738429 | 1.94123E-05 | -0.210363059 | -0.124468753 | COL23A1       |
| chr5  | 93758545  | 93758649  | 105  | * | 2 | 9.78129E-11 | 0.006987027 | 0.000741096 | 0.001648217 | -0.288935235 | -0.171027711 | KIAA0825      |
| chr11 | 112263480 | 112263709 | 230  | * | 3 | 7.21987E-19 | 1.65901E-05 | 0.00074145  | 1.33975E-05 | -0.241887703 | -0.176477629 |               |
| chr1  | 77999560  | 77999814  | 255  | * | 2 | 2.07484E-11 | 0.347249376 | 0.000742279 | 0.003296746 | -0.303545808 | -0.152530626 | AK5           |
| chr2  | 208734940 | 208735200 | 261  | * | 2 | 6.41282E-13 | 0.000201237 | 0.000742749 | 0.000227422 | -0.350727657 | -0.248030848 | PLEKHM3       |
| chr16 | 28517278  | 28518347  | 1070 | * | 7 | 2.32504E-43 | 2.20876E-13 | 0.000743623 | 3.30239E-12 | -0.320602306 | -0.166571778 | IL27          |
| chr2  | 7150625   | 7150719   | 95   | * | 2 | 3.4171E-16  | 4.71179E-06 | 0.000743992 | 1.10949E-05 | -0.290879353 | -0.252637116 | RNF144A       |
| chr6  | 7165647   | 7167468   | 1822 | * | 4 | 3.91544E-22 | 3.19513E-10 | 0.000745124 | 3.56606E-09 | -0.307394601 | -0.124921826 | RREB1         |
| chr16 | 84118667  | 84118790  | 124  | * | 3 | 6.20197E-18 | 6.95324E-06 | 0.000745933 | 1.68638E-05 | -0.180630329 | -0.131840132 | MBTPS1        |
| chr22 | 21258874  | 21259095  | 222  | * | 2 | 1.01607E-11 | 0.001239959 | 0.000747204 | 0.00072159  | -0.329045415 | -0.185331406 |               |
| chr5  | 43533981  | 43534107  | 127  | * | 2 | 2.03576E-10 | 0.054273345 | 0.000747847 | 0.002923105 | 0.23492191   | 0.123399665  | PAIP1         |
| chr5  | 78184094  | 78184639  | 546  | * | 2 | 1.96536E-12 | 0.012131937 | 0.000748379 | 0.002027968 | -0.375956537 | -0.191583431 | ARSB          |
| chr7  | 1012599   | 1012935   | 337  | * | 2 | 4.87831E-16 | 6.66427E-05 | 0.000748613 | 0.000101245 | -0.242194    | -0.207494892 | COX19         |

|       |           |           |      |   |    |             |             |             |             |              |              |                          |
|-------|-----------|-----------|------|---|----|-------------|-------------|-------------|-------------|--------------|--------------|--------------------------|
| chr17 | 76384259  | 76384516  | 258  | * | 2  | 7.54471E-11 | 0.094689094 | 0.000749014 | 0.003137848 | -0.167801284 | -0.082945038 | PGS1                     |
| chr6  | 138426712 | 138427309 | 598  | * | 3  | 7.04489E-15 | 0.001091221 | 0.000749547 | 0.000601555 | -0.213783711 | -0.128696134 | PERP                     |
| chr8  | 23405208  | 23405296  | 89   | * | 2  | 1.60428E-10 | 0.012666427 | 0.000749741 | 0.002059769 | -0.210147075 | -0.11462595  | SLC25A37                 |
| chr6  | 25965330  | 25966684  | 1355 | * | 4  | 2.59359E-24 | 2.06627E-06 | 0.000750894 | 2.94354E-07 | -0.283190174 | -0.212432679 | TRIM38                   |
| chr3  | 46504469  | 46505093  | 625  | * | 3  | 1.43044E-16 | 0.058534958 | 0.000751814 | 0.004205762 | -0.213529796 | -0.057478362 | LTF                      |
| chr16 | 1988449   | 1988798   | 350  | * | 2  | 2.65137E-16 | 3.9563E-06  | 0.000752597 | 9.50726E-06 | -0.338274861 | -0.289716966 | MSRB1                    |
| chr1  | 180579182 | 180579844 | 663  | * | 3  | 7.30336E-17 | 1.54333E-05 | 0.000752878 | 1.39285E-05 | -0.348364937 | -0.066995379 |                          |
| chr10 | 3933423   | 3933940   | 518  | * | 3  | 1.33378E-13 | 0.02194119  | 0.000754338 | 0.00263033  | -0.275743234 | -0.100468029 |                          |
| chr20 | 33491767  | 33492100  | 334  | * | 2  | 1.28333E-11 | 0.004871052 | 0.00075589  | 0.001438812 | 0.255173835  | 0.12040007   | ACSS2                    |
| chr10 | 3507176   | 3507462   | 287  | * | 2  | 6.94534E-12 | 0.00967138  | 0.000757567 | 0.001891488 | -0.24363255  | -0.143901834 |                          |
| chr15 | 91490436  | 91490804  | 369  | * | 2  | 1.98169E-12 | 0.009489829 | 0.000760771 | 0.001884228 | 0.11281909   | 0.07122839   | UNC45A                   |
| chr3  | 52320096  | 52321832  | 1737 | * | 14 | 1.00802E-41 | 0.006860792 | 0.000761296 | 0.000310106 | -0.381784988 | -0.069125989 | GLYCKT, WDR82            |
| chr2  | 129491004 | 129491398 | 395  | * | 2  | 1.16014E-12 | 0.021620826 | 0.000761666 | 0.002443273 | -0.267734254 | -0.129853524 |                          |
| chr1  | 236109168 | 236109875 | 708  | * | 3  | 4.33607E-20 | 1.24274E-05 | 0.000761676 | 1.42936E-05 | -0.405042316 | -0.250644313 |                          |
| chr1  | 1689012   | 1690389   | 1378 | * | 7  | 3.18387E-23 | 0.412601043 | 0.000762065 | 0.01055152  | -0.189847289 | -0.040213272 | NADK                     |
| chr14 | 77542043  | 77543192  | 1150 | * | 8  | 5.51459E-31 | 0.000226185 | 0.000762398 | 4.87995E-06 | -0.347635104 | -0.102734947 | RP11-7F17.4, RP11-7F17.3 |
| chr7  | 4774448   | 4775278   | 831  | * | 3  | 2.79523E-14 | 0.00032733  | 0.000762902 | 0.00018494  | 0.11297161   | 0.073372586  | FOXK1                    |
| chr1  | 12094651  | 12095619  | 969  | * | 2  | 1.50143E-12 | 9.45884E-06 | 0.000762948 | 2.05426E-05 | -0.27186069  | -0.223161953 |                          |
| chr10 | 72326192  | 72326780  | 589  | * | 2  | 6.03619E-13 | 0.003877578 | 0.000765722 | 0.00131073  | -0.243176635 | -0.127532459 | PALD1                    |
| chr6  | 167493383 | 167493614 | 232  | * | 2  | 1.74724E-11 | 0.009224622 | 0.000766006 | 0.00187395  | 0.109044121  | 0.068759438  | RP11-517H2.6             |
| chr2  | 48373026  | 48373252  | 227  | * | 2  | 7.7251E-11  | 0.013867613 | 0.000766089 | 0.002154778 | -0.230990196 | -0.107517842 | AC079807.4               |
| chr17 | 35467087  | 35467482  | 396  | * | 2  | 1.57065E-11 | 0.028647451 | 0.000766187 | 0.002633179 | -0.188214638 | -0.097869173 | ACACA                    |
| chr11 | 64267330  | 64269071  | 1742 | * | 5  | 6.71785E-24 | 8.37537E-05 | 0.000766289 | 3.57068E-07 | 0.16750087   | 0.017691971  | AP005273.1               |
| chr12 | 108054373 | 108054842 | 470  | * | 3  | 9.526E-15   | 0.016422763 | 0.000766691 | 0.001303571 | -0.275892134 | -0.056048643 |                          |
| chr14 | 20978481  | 20978830  | 350  | * | 5  | 1.8863E-21  | 0.019151921 | 0.00076704  | 0.000189367 | -0.262563095 | -0.094520893 | RNASE10                  |
| chr8  | 126365081 | 126365454 | 374  | * | 2  | 3.43907E-12 | 0.004934748 | 0.000769511 | 0.001463929 | -0.273571939 | -0.168215584 | NSMCE2                   |
| chr16 | 68280921  | 68281979  | 1059 | * | 4  | 2.76492E-28 | 1.14847E-09 | 0.000769861 | 1.01968E-08 | 0.200282761  | 0.143861781  | PLA2G15                  |
| chr17 | 56357994  | 56358504  | 511  | * | 3  | 8.71659E-27 | 1.05471E-07 | 0.000772614 | 4.73123E-07 | -0.224410549 | -0.199588674 | MPO                      |
| chr20 | 23107102  | 23107233  | 132  | * | 2  | 9.69462E-14 | 8.47419E-05 | 0.000774306 | 0.000122955 | -0.094464383 | -0.085847643 | LINC00656                |

|       |           |           |      |   |   |             |             |             |             |              |              |                       |
|-------|-----------|-----------|------|---|---|-------------|-------------|-------------|-------------|--------------|--------------|-----------------------|
| chr10 | 82251396  | 82251784  | 389  | * | 2 | 7.31479E-16 | 6.38366E-06 | 0.000774605 | 1.46114E-05 | -0.368276545 | -0.251806786 | TSPAN14               |
| chr22 | 31618985  | 31620013  | 1029 | * | 5 | 9.59215E-25 | 4.01124E-06 | 0.000776737 | 2.12107E-07 | -0.288077562 | -0.059275421 | LIMK2                 |
| chr19 | 39142011  | 39142260  | 250  | * | 2 | 1.18835E-12 | 0.001671363 | 0.000776976 | 0.000869058 | -0.32005765  | -0.195977672 | ACTN4                 |
| chr1  | 24523702  | 24524234  | 533  | * | 2 | 5.11095E-16 | 0.000172941 | 0.00077718  | 0.000208029 | -0.389551547 | -0.22522548  |                       |
| chr15 | 92399195  | 92399897  | 703  | * | 2 | 2.38198E-14 | 0.001135649 | 0.00077852  | 0.000701899 | 0.132820724  | 0.023074894  | SLCO3A1               |
| chr4  | 87882342  | 87883021  | 680  | * | 2 | 5.49584E-15 | 6.45507E-05 | 0.000778695 | 0.000100026 | -0.252208607 | -0.149910441 | AFF1                  |
| chr20 | 3087359   | 3088152   | 794  | * | 4 | 5.34466E-22 | 1.11944E-05 | 0.000779115 | 8.06007E-06 | -0.226751821 | -0.106735166 | UBOX5-AS1             |
| chr20 | 1800881   | 1801483   | 603  | * | 2 | 4.17016E-13 | 0.001160761 | 0.000780587 | 0.000711738 | -0.3395626   | -0.144178205 |                       |
| chr17 | 79244158  | 79244962  | 805  | * | 4 | 6.70057E-22 | 0.004842081 | 0.000781783 | 8.81398E-05 | -0.360255732 | -0.13669236  | SLC38A10              |
| chr2  | 47073778  | 47074152  | 375  | * | 2 | 1.40202E-14 | 0.209427455 | 0.000781943 | 0.003419071 | -0.304685859 | -0.151975936 | LINC01119             |
| chr6  | 157942421 | 157942704 | 284  | * | 2 | 5.60748E-16 | 5.48186E-06 | 0.000782212 | 1.27903E-05 | -0.2910894   | -0.227884905 | ZDHHC14               |
| chr22 | 30612521  | 30612925  | 405  | * | 2 | 1.59725E-12 | 0.006357765 | 0.000783111 | 0.001647572 | 0.219057177  | 0.124201911  |                       |
| chr20 | 43984001  | 43984247  | 247  | * | 2 | 2.09346E-11 | 0.00228509  | 0.000785308 | 0.001030389 | 0.168766408  | 0.073453179  |                       |
| chr20 | 48383802  | 48383974  | 173  | * | 2 | 5.60213E-18 | 3.93359E-06 | 0.00078605  | 9.51581E-06 | -0.26790732  | -0.25255388  |                       |
| chr8  | 23397998  | 23399610  | 1613 | * | 6 | 1.21164E-31 | 3.23448E-05 | 0.000786319 | 6.60586E-08 | -0.268768748 | -0.137782167 | SLC25A37              |
| chr17 | 4092306   | 4093344   | 1039 | * | 4 | 1.07195E-16 | 0.014272975 | 0.000788567 | 8.39376E-05 | -0.228876984 | -0.083744319 | ANKFY1                |
| chr15 | 86171055  | 86171721  | 667  | * | 3 | 8.47418E-19 | 2.42513E-06 | 0.000788859 | 4.57865E-06 | -0.281092136 | -0.170732095 | AKAP13, RP11-815J21.4 |
| chr21 | 35016787  | 35016873  | 87   | * | 2 | 2.7617E-15  | 3.76435E-05 | 0.000788983 | 6.56355E-05 | -0.339368495 | -0.218123114 | ITSN1, AP000304.12    |
| chr10 | 105792531 | 105793358 | 828  | * | 3 | 1.48477E-20 | 6.32629E-08 | 0.0007892   | 3.04497E-07 | -0.310517516 | -0.215843382 | COL17A1               |
| chr18 | 61344467  | 61345309  | 843  | * | 3 | 9.5716E-20  | 2.6647E-06  | 0.000789848 | 5.20413E-06 | -0.308923012 | -0.21081341  | SERPINB11             |
| chr3  | 182929476 | 182930505 | 1030 | * | 3 | 1.74269E-18 | 4.54664E-06 | 0.000789971 | 7.78739E-06 | -0.247055251 | -0.189710257 | MCF2L2                |
| chr19 | 4374239   | 4374567   | 329  | * | 2 | 3.32917E-12 | 0.002695254 | 0.000793238 | 0.001126398 | -0.280874369 | -0.148583641 | SH3GL1                |
| chr11 | 10482235  | 10482612  | 378  | * | 3 | 5.7523E-24  | 8.82275E-08 | 0.000795592 | 4.21334E-07 | -0.412822456 | -0.312566309 | AMPD3                 |
| chr9  | 35042014  | 35042395  | 382  | * | 3 | 1.85257E-16 | 0.002514057 | 0.000795842 | 0.000241749 | -0.165240888 | -0.098932762 | C9orf131, FLJ00273    |
| chr16 | 17555588  | 17555963  | 376  | * | 2 | 3.04517E-11 | 0.091849251 | 0.000796022 | 0.003295393 | -0.220768072 | -0.111144092 | XYLT1                 |
| chr7  | 127035858 | 127036361 | 504  | * | 2 | 2.29172E-12 | 0.002874543 | 0.000796168 | 0.001165329 | -0.307099485 | -0.172318292 | ZNF800                |
| chr3  | 5133902   | 5134159   | 258  | * | 2 | 8.1068E-14  | 4.90799E-05 | 0.000796439 | 8.12968E-05 | -0.310511759 | -0.18406345  |                       |
| chr16 | 84218197  | 84219629  | 1433 | * | 7 | 4.11429E-38 | 6.78669E-06 | 0.000796599 | 2.71402E-08 | 0.229220627  | 0.124383051  | TAF1C                 |
| chr15 | 91094168  | 91095069  | 902  | * | 3 | 1.97655E-16 | 0.001640999 | 0.000799015 | 0.000315    | -0.368238042 | -0.168351288 | CRTC3                 |

|       |           |           |      |   |   |             |             |             |             |              |              |                       |
|-------|-----------|-----------|------|---|---|-------------|-------------|-------------|-------------|--------------|--------------|-----------------------|
| chr12 | 122249869 | 122251166 | 1298 | * | 7 | 4.70494E-21 | 0.196242237 | 0.000799231 | 0.000951461 | -0.24066205  | -0.026532345 | SETD1B                |
| chr15 | 50570103  | 50570473  | 371  | * | 2 | 6.38526E-16 | 5.15299E-06 | 0.000800045 | 1.21476E-05 | -0.29775837  | -0.225231686 | GABPB1                |
| chr5  | 176766085 | 176766954 | 870  | * | 3 | 2.50941E-19 | 0.000222139 | 0.000800154 | 4.82752E-05 | -0.14462769  | -0.018748587 | LMAN2                 |
| chr2  | 40599929  | 40599951  | 23   | * | 2 | 1.6328E-16  | 6.70078E-06 | 0.000800365 | 1.53314E-05 | -0.160794054 | -0.151904271 | SLC8A1                |
| chr17 | 56315750  | 56316162  | 413  | * | 4 | 2.66524E-21 | 9.76883E-05 | 0.000801582 | 1.68099E-05 | -0.330831392 | -0.123194237 | LPO                   |
| chr14 | 89626932  | 89626995  | 64   | * | 2 | 2.05638E-11 | 0.001906122 | 0.000801643 | 0.000948979 | -0.169749024 | -0.092826502 | FOXN3                 |
| chr10 | 43366622  | 43367193  | 572  | * | 3 | 1.22167E-12 | 0.062856088 | 0.000803767 | 0.005851032 | -0.284221446 | -0.094200444 | RP11-124O11.1         |
| chr7  | 141646270 | 141647505 | 1236 | * | 4 | 3.18567E-22 | 0.002139771 | 0.000804216 | 5.26533E-05 | -0.345937869 | -0.150421771 | MGAM, CLEC5A          |
| chr16 | 54209183  | 54209779  | 597  | * | 4 | 1.2451E-21  | 0.002791078 | 0.000805999 | 0.000177873 | -0.244183438 | -0.101587742 |                       |
| chr11 | 121466430 | 121466629 | 200  | * | 3 | 3.83179E-12 | 0.104290799 | 0.000806583 | 0.006613424 | -0.25327075  | -0.085799724 | SORL1                 |
| chr18 | 21163172  | 21163549  | 378  | * | 2 | 1.62559E-11 | 0.007672862 | 0.000808363 | 0.00181461  | -0.332213919 | -0.17074486  | NPC1                  |
| chr16 | 90023526  | 90024450  | 925  | * | 4 | 2.35912E-30 | 5.23223E-09 | 0.000809216 | 3.00841E-08 | -0.29153104  | -0.139128642 | DEF8                  |
| chr8  | 22131448  | 22132434  | 987  | * | 4 | 1.63842E-29 | 0.000151627 | 0.000809761 | 2.16129E-05 | -0.311105848 | -0.131753097 | CTD-2530N21.4         |
| chr6  | 6928298   | 6928585   | 288  | * | 2 | 8.74263E-11 | 0.03743771  | 0.000813354 | 0.002927798 | -0.317541762 | -0.168575741 |                       |
| chr10 | 90611604  | 90612228  | 625  | * | 6 | 2.04186E-37 | 3.08553E-11 | 0.000814072 | 5.80529E-10 | -0.315533527 | -0.172027016 |                       |
| chr1  | 153337977 | 153338215 | 239  | * | 2 | 7.71513E-15 | 1.46237E-05 | 0.000814369 | 3.02421E-05 | -0.206294578 | -0.20310989  |                       |
| chr22 | 24894704  | 24895105  | 402  | * | 2 | 2.06061E-11 | 0.020920031 | 0.00081474  | 0.002549641 | -0.148270848 | -0.064810725 | UPB1                  |
| chr12 | 10283049  | 10283763  | 715  | * | 3 | 1.62215E-14 | 0.017370683 | 0.000815411 | 0.001635041 | -0.273506949 | -0.130057113 |                       |
| chr17 | 15141116  | 15142509  | 1394 | * | 5 | 3.31223E-23 | 0.001630072 | 0.000818398 | 0.000133559 | -0.262576054 | -0.113577989 | PMP22, snoU13         |
| chr6  | 34308310  | 34309455  | 1146 | * | 3 | 4.35602E-17 | 0.007092874 | 0.000818679 | 0.000250269 | -0.295637901 | -0.059499259 | NUDT3, RPS10-NUDT3    |
| chr9  | 96929106  | 96929332  | 227  | * | 2 | 6.0818E-12  | 0.00055318  | 0.000819237 | 0.000466378 | 0.052352412  | 0.019032117  | RP11-2B6.3            |
| chr7  | 94185174  | 94185539  | 366  | * | 2 | 4.30123E-11 | 0.110784326 | 0.00081947  | 0.003437324 | -0.294477953 | -0.150135776 | CASD1                 |
| chr21 | 18823448  | 18823803  | 356  | * | 2 | 2.66622E-12 | 0.000651873 | 0.000819708 | 0.000517195 | -0.245467838 | -0.175066302 |                       |
| chr12 | 12620523  | 12620789  | 267  | * | 2 | 1.83268E-12 | 0.000303284 | 0.000820455 | 0.00031442  | -0.315871905 | -0.173719152 |                       |
| chr18 | 77554583  | 77554951  | 369  | * | 2 | 3.06815E-13 | 0.059885749 | 0.000820803 | 0.003205479 | -0.165963856 | -0.075703776 | RP11-154H12.3         |
| chr11 | 63858820  | 63858880  | 61   | * | 2 | 3.30534E-16 | 4.25262E-06 | 0.000821317 | 1.02687E-05 | -0.315542963 | -0.278069899 | RP11-21A7A.2, MACROD1 |
| chr8  | 121797718 | 121798364 | 647  | * | 3 | 9.96878E-14 | 0.004792379 | 0.000821703 | 0.001678225 | -0.282573385 | -0.12231339  | SNTB1                 |
| chr6  | 32967930  | 32968406  | 477  | * | 2 | 1.21115E-11 | 0.07606679  | 0.000823538 | 0.003320855 | -0.382207775 | -0.19719142  |                       |
| chr4  | 1227091   | 1227400   | 310  | * | 2 | 2.6508E-12  | 0.004169582 | 0.000824597 | 0.001420187 | 0.17976445   | 0.09984265   | CTBP1                 |

|       |           |           |      |   |   |             |             |             |             |              |              |                      |
|-------|-----------|-----------|------|---|---|-------------|-------------|-------------|-------------|--------------|--------------|----------------------|
| chr14 | 105860954 | 105861260 | 307  | * | 3 | 3.48129E-18 | 0.000137696 | 0.00082523  | 3.69683E-05 | -0.281985969 | -0.055109048 | PACS2                |
| chr19 | 718875    | 719951    | 1077 | * | 5 | 5.60717E-20 | 0.002545847 | 0.000826474 | 0.00130796  | -0.162001244 | -0.061484567 | PALM                 |
| chr12 | 113330370 | 113330801 | 432  | * | 2 | 2.95993E-12 | 0.024604284 | 0.000827582 | 0.002694146 | -0.241697921 | -0.12436021  | RPH3A                |
| chr12 | 10320327  | 10320770  | 444  | * | 4 | 3.94532E-24 | 6.52762E-08 | 0.000828221 | 3.45666E-07 | -0.298681383 | -0.21723394  | OLR1                 |
| chr5  | 139043443 | 139044215 | 773  | * | 3 | 9.19784E-20 | 0.000119236 | 0.000828981 | 2.94142E-05 | -0.230835469 | -0.145481538 | CXXC5                |
| chr9  | 7976529   | 7977013   | 485  | * | 2 | 1.25005E-11 | 0.337930589 | 0.00083059  | 0.003640734 | -0.312731322 | -0.156922858 |                      |
| chr6  | 13408158  | 13408527  | 370  | * | 3 | 8.83988E-14 | 0.067138613 | 0.000831293 | 0.006129727 | -0.338647271 | -0.109015036 | GFOD1                |
| chr17 | 78793479  | 78793807  | 329  | * | 2 | 4.07821E-14 | 0.000125683 | 0.000831307 | 0.000169193 | -0.249459662 | -0.173722438 | RPTOR                |
| chr1  | 36272405  | 36273317  | 913  | * | 3 | 9.1963E-18  | 0.000446136 | 0.000832834 | 0.000123518 | -0.141458326 | -0.066880911 |                      |
| chr6  | 90271152  | 90271380  | 229  | * | 3 | 1.21496E-14 | 0.067497725 | 0.00083308  | 0.006192436 | -0.284097333 | -0.094623065 | ANKRD6, RP11-16C18.3 |
| chr7  | 50791421  | 50791508  | 88   | * | 2 | 1.06087E-11 | 0.000437472 | 0.000833326 | 0.000404118 | -0.247184438 | -0.161109348 | GRB10                |
| chr3  | 194826197 | 194827291 | 1095 | * | 6 | 1.78916E-29 | 2.35199E-05 | 0.000833457 | 7.13343E-07 | -0.380393021 | -0.165402894 | XXYLT1               |
| chr12 | 50481901  | 50482541  | 641  | * | 3 | 1.93245E-13 | 0.007296656 | 0.000833606 | 0.00149772  | -0.363467543 | -0.07565283  | SMARCD1              |
| chr16 | 56817295  | 56817478  | 184  | * | 3 | 7.41523E-14 | 0.016391216 | 0.000834297 | 0.000657457 | -0.331336408 | -0.160147833 | NUP93                |
| chr8  | 130692949 | 130693960 | 1012 | * | 3 | 1.13369E-14 | 0.112745728 | 0.000834644 | 0.007009907 | -0.251053478 | -0.083352158 | RP11-419K12.1        |
| chr16 | 4395425   | 4396298   | 874  | * | 4 | 5.50531E-23 | 2.15686E-05 | 0.000835315 | 8.5215E-06  | -0.281219262 | -0.157000306 | PAM16, CORO7-PAM16   |
| chr3  | 14859299  | 14859913  | 615  | * | 3 | 1.21414E-15 | 0.0239945   | 0.00083554  | 0.003952555 | 0.186134421  | 0.054059751  |                      |
| chr3  | 128134323 | 128134845 | 523  | * | 2 | 1.29188E-14 | 2.45817E-05 | 0.000835945 | 4.70498E-05 | -0.169738585 | -0.01218542  |                      |
| chr4  | 7830035   | 7830788   | 754  | * | 4 | 1.01805E-22 | 4.14733E-05 | 0.000837149 | 1.01861E-05 | -0.343027393 | -0.128898156 | AFAP1                |
| chr16 | 87228728  | 87228921  | 194  | * | 2 | 5.14666E-13 | 0.001213289 | 0.000837381 | 0.000757924 | 0.240840401  | 0.136886164  | C16orf95             |
| chr2  | 106438120 | 106438173 | 54   | * | 2 | 1.97152E-14 | 1.66391E-05 | 0.000840946 | 3.39744E-05 | -0.382769113 | -0.242399161 | NCK2                 |
| chr2  | 38101511  | 38101852  | 342  | * | 2 | 2.46991E-13 | 0.000270221 | 0.000842233 | 0.000293757 | 0.197611745  | 0.133771276  | LINC00211            |
| chr1  | 13949753  | 13950049  | 297  | * | 3 | 4.68964E-12 | 0.114658268 | 0.000843715 | 0.006174129 | -0.290777565 | -0.117326657 | RNA5SP41             |
| chr11 | 32915497  | 32916120  | 624  | * | 4 | 4.26919E-15 | 0.194862533 | 0.000843896 | 0.008938127 | -0.14034842  | -0.034112494 | QSER1                |
| chr19 | 51843601  | 51843854  | 254  | * | 2 | 4.40981E-15 | 1.18894E-05 | 0.000844058 | 2.55131E-05 | 0.109941259  | 0.0678845    | VSIG10L              |
| chr20 | 35943580  | 35943761  | 182  | * | 2 | 6.45343E-14 | 4.5616E-05  | 0.000844274 | 7.79997E-05 | 0.211470109  | 0.147584463  | MANBAL               |
| chr9  | 110310795 | 110311041 | 247  | * | 3 | 6.93795E-20 | 9.19645E-07 | 0.000846364 | 2.85097E-06 | -0.233841801 | -0.181077705 |                      |
| chr5  | 148799955 | 148800342 | 388  | * | 2 | 1.84269E-12 | 0.01409534  | 0.000846436 | 0.002330321 | -0.250734854 | -0.119972494 | MIR143HG             |
| chr4  | 55198258  | 55198664  | 407  | * | 3 | 2.54678E-14 | 0.018672801 | 0.000846599 | 0.003520049 | -0.400461918 | -0.141955471 |                      |

|       |           |           |      |   |    |             |             |             |             |              |              |               |
|-------|-----------|-----------|------|---|----|-------------|-------------|-------------|-------------|--------------|--------------|---------------|
| chr19 | 32895186  | 32895911  | 726  | * | 3  | 3.26881E-22 | 0.000116801 | 0.000846916 | 2.95895E-05 | -0.277752389 | -0.156310996 | AC007773.2    |
| chr14 | 70098523  | 70099253  | 731  | * | 2  | 4.368E-14   | 3.85206E-05 | 0.000847253 | 6.817E-05   | -0.250954041 | -0.174945556 | KIAA0247      |
| chr9  | 80851623  | 80852403  | 781  | * | 2  | 1.24055E-14 | 0.000811051 | 0.00084767  | 0.000601383 | -0.31786917  | -0.146354447 | CEP78         |
| chr14 | 102746504 | 102747018 | 515  | * | 2  | 5.55977E-14 | 5.43652E-05 | 0.00084795  | 8.97612E-05 | -0.31143683  | -0.206156288 | MOK           |
| chr12 | 49071788  | 49072098  | 311  | * | 2  | 2.27216E-12 | 0.000355499 | 0.000848251 | 0.000355035 | -0.311152892 | -0.121771693 | KANSL2        |
| chr2  | 85944732  | 85945326  | 595  | * | 2  | 3.40579E-15 | 4.92614E-05 | 0.000848294 | 8.3034E-05  | -0.246634338 | -0.052123954 |               |
| chr11 | 62344463  | 62344975  | 513  | * | 4  | 1.6238E-13  | 0.210741395 | 0.000848623 | 0.015361904 | -0.29685363  | -0.080985922 | MIR3654, TUT1 |
| chr19 | 33764550  | 33765020  | 471  | * | 2  | 3.53872E-14 | 0.029799082 | 0.000849186 | 0.002881386 | -0.334060187 | -0.160131106 |               |
| chr6  | 2798624   | 2798912   | 289  | * | 2  | 1.17513E-10 | 0.074901887 | 0.000849268 | 0.003401424 | -0.291188616 | -0.147571039 |               |
| chr2  | 120191616 | 120192027 | 412  | * | 2  | 7.29208E-12 | 0.086144963 | 0.000849275 | 0.003458285 | -0.276015045 | -0.136434058 | TMEM37        |
| chr15 | 93571988  | 93572609  | 622  | * | 2  | 3.13769E-15 | 0.000158448 | 0.000850534 | 0.000202134 | -0.105477956 | -0.079776585 |               |
| chr7  | 2153671   | 2154175   | 505  | * | 5  | 9.43758E-16 | 0.605630578 | 0.000850706 | 0.037998929 | -0.212556649 | -0.040287066 | MAD1L1        |
| chr5  | 171807791 | 171808623 | 833  | * | 3  | 7.0326E-19  | 0.004280129 | 0.000851052 | 4.77099E-05 | -0.338866279 | -0.160782562 | SH3PXD2B      |
| chr1  | 65381300  | 65381747  | 448  | * | 2  | 6.93826E-13 | 0.002355604 | 0.000851767 | 0.001097803 | 0.156367133  | 0.091381127  | JAK1          |
| chr1  | 17956219  | 17956700  | 482  | * | 2  | 8.8824E-12  | 0.012938417 | 0.000851824 | 0.002275876 | -0.228986342 | -0.098081297 | ARHGEF10L     |
| chr1  | 182538701 | 182539141 | 441  | * | 2  | 6.17278E-12 | 0.038869397 | 0.000852004 | 0.00306227  | 0.232190478  | 0.120139328  |               |
| chr9  | 127114588 | 127114914 | 327  | * | 2  | 2.59173E-13 | 0.093471771 | 0.000853736 | 0.003504093 | -0.33737917  | -0.164752042 | NEK6          |
| chr9  | 97545514  | 97545827  | 314  | * | 3  | 2.30286E-18 | 0.000523961 | 0.000853736 | 3.98542E-05 | -0.376318811 | -0.150520858 | C9orf3        |
| chr5  | 10335254  | 10336062  | 809  | * | 3  | 4.50627E-16 | 0.00020028  | 0.000854567 | 0.000139498 | -0.339197383 | -0.174394863 |               |
| chr22 | 17955274  | 17956641  | 1368 | * | 10 | 1.12836E-45 | 2.55903E-09 | 0.000854867 | 3.15782E-10 | -0.260161521 | -0.099379224 | CECR2         |
| chr16 | 81347052  | 81347858  | 807  | * | 5  | 7.66901E-27 | 3.5207E-06  | 0.000854924 | 3.81943E-06 | 0.203942814  | 0.095392219  |               |
| chr6  | 134956367 | 134956701 | 335  | * | 3  | 3.48518E-14 | 0.007960738 | 0.000855024 | 0.001139671 | -0.253089946 | -0.10296238  | RP11-557H15.4 |
| chr16 | 53120120  | 53120404  | 285  | * | 2  | 9.84725E-11 | 0.014283634 | 0.000855878 | 0.002359416 | 0.253223233  | 0.120864603  | CHD9          |
| chr3  | 14265164  | 14265984  | 821  | * | 2  | 3.52376E-13 | 1.31607E-05 | 0.000858726 | 2.79363E-05 | 0.16691481   | 0.130388251  |               |
| chr3  | 123531610 | 123532834 | 1225 | * | 4  | 1.46396E-19 | 6.73806E-06 | 0.00085999  | 1.13072E-05 | 0.186420423  | 0.128338206  | MYLK          |
| chr10 | 98679920  | 98679962  | 43   | * | 2  | 4.71658E-10 | 0.016045581 | 0.000862321 | 0.00246169  | 0.23158299   | 0.124712681  | LCOR          |
| chr3  | 159726855 | 159726973 | 119  | * | 3  | 6.64677E-22 | 6.6884E-08  | 0.000862632 | 3.38099E-07 | -0.247334153 | -0.212791684 | IL12A-AS1     |
| chr11 | 12158816  | 12159950  | 1135 | * | 6  | 6.18232E-20 | 0.031282343 | 0.000865016 | 0.00442184  | -0.329396432 | -0.048403793 | MICAL2        |
| chr7  | 17409912  | 17410340  | 429  | * | 3  | 4.71811E-14 | 0.001337768 | 0.000866378 | 0.000619392 | -0.163275797 | -0.053037864 |               |

|       |           |           |      |   |    |             |             |             |             |              |              |                       |
|-------|-----------|-----------|------|---|----|-------------|-------------|-------------|-------------|--------------|--------------|-----------------------|
| chr12 | 129304569 | 129305480 | 912  | * | 4  | 1.8659E-18  | 0.000110537 | 0.000866992 | 0.000116878 | -0.385253218 | -0.1537512   | SLC15A4               |
| chr8  | 97597118  | 97597395  | 278  | * | 2  | 2.52384E-13 | 0.000249294 | 0.000867018 | 0.000281114 | -0.252496456 | -0.164281549 | SDC2                  |
| chr11 | 44730975  | 44731693  | 719  | * | 2  | 2.81172E-13 | 7.92016E-05 | 0.000867215 | 0.000121165 | -0.134354616 | -0.112199255 |                       |
| chr20 | 31036723  | 31037515  | 793  | * | 4  | 8.90923E-26 | 2.59952E-05 | 0.000867715 | 8.44148E-07 | -0.203393227 | -0.132832324 | C20orf112             |
| chr4  | 54928819  | 54928822  | 4    | * | 2  | 1.44272E-16 | 4.90619E-06 | 0.000867919 | 1.17649E-05 | -0.298337629 | -0.297244163 | FIP1L1, CHIC2         |
| chr9  | 116377482 | 116377632 | 151  | * | 2  | 6.19287E-15 | 1.07135E-05 | 0.000868378 | 2.34413E-05 | 0.199918058  | 0.192430143  |                       |
| chr1  | 221338314 | 221338400 | 87   | * | 2  | 1.08129E-10 | 0.0022246   | 0.000869464 | 0.001078602 | -0.121287382 | -0.051419789 |                       |
| chr17 | 41172092  | 41174035  | 1944 | * | 9  | 1.53737E-36 | 4.07719E-06 | 0.000870188 | 2.78329E-09 | -0.282053982 | -0.115684169 | VAT1                  |
| chr3  | 37948694  | 37949403  | 710  | * | 2  | 2.36413E-13 | 7.12771E-05 | 0.000870247 | 0.000111813 | 0.174716656  | 0.152405025  | CTDSPL                |
| chr8  | 131454686 | 131456284 | 1599 | * | 10 | 1.39125E-29 | 0.043597687 | 0.000871264 | 0.00285257  | -0.151902876 | -0.012720363 | ASAP1                 |
| chr3  | 154688152 | 154689271 | 1120 | * | 4  | 1.93562E-14 | 0.159786789 | 0.00087138  | 0.014222408 | -0.167716771 | -0.049952929 |                       |
| chr17 | 1510080   | 1510666   | 587  | * | 2  | 5.0223E-16  | 0.003165805 | 0.000872266 | 0.001291404 | -0.199704686 | -0.112394879 | SLC43A2               |
| chr2  | 231299880 | 231300356 | 477  | * | 2  | 2.03883E-11 | 0.096064407 | 0.000873139 | 0.003581726 | -0.302587558 | -0.144249912 | SP100                 |
| chr15 | 74927688  | 74928240  | 553  | * | 2  | 8.07625E-13 | 0.000452493 | 0.000874391 | 0.000422217 | -0.179833092 | -0.106333211 | CLK3, EDC3            |
| chr20 | 62297697  | 62297748  | 52   | * | 2  | 4.79947E-15 | 8.99365E-06 | 0.000875237 | 2.01545E-05 | -0.117278092 | -0.110685065 | RTEL1, RTEL1-TNFRSF6B |
| chr4  | 113192453 | 113192515 | 63   | * | 2  | 5.94696E-16 | 5.00452E-06 | 0.000875928 | 1.19916E-05 | -0.331857172 | -0.328915568 |                       |
| chr22 | 43490246  | 43490400  | 155  | * | 2  | 1.93297E-10 | 0.039651525 | 0.000876426 | 0.003145214 | -0.145953614 | -0.063515069 |                       |
| chr1  | 236016383 | 236017325 | 943  | * | 4  | 1.32808E-18 | 1.40098E-06 | 0.000876657 | 3.59926E-06 | -0.277019131 | -0.146505672 | LYST                  |
| chr5  | 79799656  | 79799917  | 262  | * | 2  | 3.27189E-11 | 0.00190175  | 0.000876765 | 0.000997497 | -0.272188207 | -0.15551029  | FAM151B               |
| chr2  | 74358223  | 74358815  | 593  | * | 2  | 3.39293E-16 | 0.040038655 | 0.000878383 | 0.003157044 | 0.120021114  | 0.063610997  |                       |
| chr10 | 6441379   | 6442501   | 1123 | * | 3  | 6.67662E-13 | 0.000546324 | 0.000878438 | 0.000157362 | -0.337590869 | -0.166667121 |                       |
| chr1  | 55753454  | 55753555  | 102  | * | 2  | 4.34992E-11 | 0.0743187   | 0.000878972 | 0.003497595 | 0.199116025  | 0.106517673  |                       |
| chr8  | 622011    | 622993    | 983  | * | 4  | 2.78673E-17 | 0.011030914 | 0.000880746 | 0.003166601 | -0.291812653 | -0.049220267 | ERICH1                |
| chr4  | 159727112 | 159727390 | 279  | * | 2  | 8.53913E-11 | 0.006748786 | 0.000882558 | 0.001829398 | -0.184842208 | -0.1138552   | FNIP2                 |
| chr8  | 1896437   | 1898438   | 2002 | * | 11 | 1.62596E-52 | 3.5412E-12  | 0.000883228 | 5.632E-12   | -0.322139388 | -0.1406582   | ARHGEF10              |
| chr4  | 88140261  | 88140994  | 734  | * | 3  | 8.50086E-16 | 0.014938266 | 0.000883495 | 0.002886037 | -0.229199988 | -0.051508608 | KLHL8                 |
| chr21 | 43919316  | 43919853  | 538  | * | 3  | 3.66224E-13 | 0.074491868 | 0.000883591 | 0.0064033   | 0.184063091  | 0.076865432  | SLC37A1               |
| chr10 | 129925561 | 129925760 | 200  | * | 2  | 2.84877E-14 | 0.0381941   | 0.000884353 | 0.003143731 | -0.211921699 | -0.108876696 |                       |
| chr16 | 85935556  | 85936666  | 1111 | * | 9  | 8.74911E-23 | 0.107657641 | 0.000884582 | 0.007483206 | -0.269272238 | -0.013075306 | IRF8                  |



|       |           |           |      |   |    |             |             |             |             |              |              |                               |
|-------|-----------|-----------|------|---|----|-------------|-------------|-------------|-------------|--------------|--------------|-------------------------------|
| chr16 | 85063738  | 85063787  | 50   | * | 3  | 2.21378E-21 | 6.54828E-07 | 0.000884838 | 1.93241E-06 | -0.372444416 | -0.285752086 | KIAA0513                      |
| chr19 | 8568012   | 8569300   | 1289 | * | 4  | 1.93801E-25 | 6.00053E-07 | 0.000885442 | 1.12082E-06 | -0.372951084 | -0.183890022 |                               |
| chr17 | 80199608  | 80201299  | 1692 | * | 7  | 9.23394E-26 | 6.02929E-05 | 0.000886871 | 1.27132E-06 | -0.309977238 | -0.112320094 | SLC16A3, CSNK1D               |
| chr16 | 72965762  | 72966213  | 452  | * | 2  | 3.5713E-14  | 3.60559E-05 | 0.000888118 | 6.5423E-05  | -0.18463303  | -0.134826063 | ZFH3                          |
| chr1  | 214151615 | 214152076 | 462  | * | 2  | 4.0331E-14  | 0.133018772 | 0.000888384 | 0.003737019 | 0.170330938  | 0.09064782   | PROX1-AS1                     |
| chr8  | 61495559  | 61497168  | 1610 | * | 6  | 6.37475E-29 | 1.05177E-05 | 0.000888403 | 2.9947E-06  | -0.372218328 | -0.162102708 | RAB2A                         |
| chr20 | 5668835   | 5669604   | 770  | * | 2  | 2.18484E-12 | 0.073087106 | 0.000888982 | 0.003523304 | -0.418847656 | -0.213124709 |                               |
| chr7  | 138803555 | 138803912 | 358  | * | 2  | 4.49658E-13 | 0.000118268 | 0.000890956 | 0.000165699 | -0.330162021 | -0.090207097 |                               |
| chr17 | 773023    | 773283    | 261  | * | 3  | 4.63454E-12 | 0.053039979 | 0.000891869 | 0.002446453 | 0.127707211  | 0.032895138  | NXN                           |
| chr1  | 109582945 | 109583681 | 737  | * | 2  | 1.57668E-13 | 0.001288542 | 0.000892587 | 0.000811683 | -0.203863222 | -0.114223402 | WDR47                         |
| chr16 | 89048704  | 89049838  | 1135 | * | 5  | 2.08523E-17 | 0.269954399 | 0.000896099 | 0.015418586 | -0.194729017 | -0.061208507 |                               |
| chr17 | 14641538  | 14642137  | 600  | * | 3  | 1.5264E-16  | 0.003785256 | 0.00089741  | 0.00013702  | -0.327270748 | -0.17820652  |                               |
| chr16 | 56443155  | 56443295  | 141  | * | 2  | 2.05682E-15 | 6.41322E-06 | 0.000897612 | 1.50176E-05 | -0.280324499 | -0.199169085 | RP11-413H22.2, AMFR           |
| chr9  | 4850209   | 4851340   | 1132 | * | 4  | 1.44815E-20 | 0.000125204 | 0.000898566 | 4.55747E-05 | 0.214154824  | 0.020527188  | RCL1, MIR101-2, RP11-125K10.5 |
| chr22 | 38819702  | 38820214  | 513  | * | 4  | 3.28746E-22 | 0.005917676 | 0.00089901  | 0.00010859  | -0.296154683 | -0.154354635 |                               |
| chr16 | 11400403  | 11401781  | 1379 | * | 4  | 8.27803E-14 | 0.000478425 | 0.000899305 | 4.29465E-05 | -0.353210394 | -0.161223872 | RMI2                          |
| chr3  | 122043799 | 122044172 | 374  | * | 5  | 3.27746E-31 | 5.09203E-10 | 0.000900052 | 3.51243E-09 | -0.343105542 | -0.216329222 | CSTA                          |
| chr10 | 125769668 | 125770239 | 572  | * | 5  | 1.72161E-21 | 0.002751207 | 0.000900781 | 0.00012397  | -0.30823637  | -0.096247889 | CHST15                        |
| chr5  | 142983747 | 142983808 | 62   | * | 2  | 9.15563E-17 | 6.65262E-06 | 0.000900906 | 1.55233E-05 | -0.171332393 | -0.16982816  |                               |
| chr22 | 43369117  | 43369590  | 474  | * | 3  | 2.26473E-15 | 8.30788E-05 | 0.000901228 | 8.53286E-05 | -0.304276892 | -0.127015047 | PACSIN2                       |
| chr5  | 17444061  | 17444953  | 893  | * | 6  | 5.34302E-40 | 5.83984E-11 | 0.000901558 | 1.23923E-10 | -0.353578265 | -0.266068928 | RP11-321E2.4                  |
| chr12 | 1922058   | 1922255   | 198  | * | 3  | 2.4703E-20  | 2.09717E-06 | 0.000901582 | 5.06342E-06 | -0.279593638 | -0.203280494 | CACNA2D4                      |
| chr13 | 80354114  | 80354532  | 419  | * | 2  | 3.55422E-11 | 0.01616612  | 0.000901904 | 0.002550561 | -0.324410921 | -0.167071948 |                               |
| chr17 | 30675814  | 30676722  | 909  | * | 3  | 6.08732E-20 | 0.004159176 | 0.000902374 | 7.78811E-05 | 0.207339679  | 0.119348392  | RP11-227G15.3, C17orf75       |
| chr3  | 177166686 | 177167606 | 921  | * | 3  | 8.59677E-19 | 2.72436E-05 | 0.00090319  | 1.61856E-05 | -0.31601002  | -0.179327631 | LINC00578                     |
| chr14 | 106405869 | 106406341 | 473  | * | 4  | 1.29843E-19 | 0.000718    | 0.000903467 | 5.47302E-05 | 0.234711379  | 0.126735333  | IGHV6-1                       |
| chr14 | 72943461  | 72943540  | 80   | * | 2  | 1.97239E-12 | 0.000150537 | 0.000904616 | 0.000199173 | -0.238818242 | -0.154311452 | RGS6                          |
| chr17 | 74479764  | 74480528  | 765  | * | 3  | 3.06212E-19 | 0.000987669 | 0.00090465  | 4.79908E-05 | -0.360500101 | -0.221422372 | RHBDF2                        |
| chr4  | 6694021   | 6695698   | 1678 | * | 11 | 7.86618E-55 | 8.71304E-15 | 0.000904812 | 1.78454E-14 | -0.322091272 | -0.152155228 | S100P, AC093323.1             |

|       |           |           |      |   |    |             |             |             |             |              |              |                        |
|-------|-----------|-----------|------|---|----|-------------|-------------|-------------|-------------|--------------|--------------|------------------------|
| chr10 | 81708991  | 81709191  | 201  | * | 2  | 1.72354E-15 | 2.05754E-05 | 0.000910057 | 4.1351E-05  | -0.326125368 | -0.240076872 | MBL1P, SFTPD           |
| chr17 | 3704471   | 3707364   | 2894 | * | 15 | 5.68252E-57 | 4.92518E-25 | 0.000911919 | 2.22773E-22 | -0.428628425 | -0.226606553 | ITGAE, CTD-3195I5.5    |
| chr17 | 79239572  | 79239903  | 332  | * | 3  | 1.02394E-11 | 0.393984147 | 0.000912574 | 0.011138023 | -0.280175702 | -0.093352331 | SLC38A10               |
| chr1  | 200112467 | 200113062 | 596  | * | 3  | 1.14424E-11 | 0.540153535 | 0.000912598 | 0.011866614 | -0.326828    | -0.112318659 | NR5A2                  |
| chr12 | 6288571   | 6288946   | 376  | * | 2  | 4.32992E-11 | 0.077172526 | 0.000913311 | 0.003629369 | 0.152597268  | 0.079542202  |                        |
| chr5  | 40485321  | 40485667  | 347  | * | 2  | 8.47498E-11 | 0.033797903 | 0.000913721 | 0.003142217 | -0.293276548 | -0.154149311 |                        |
| chr20 | 33463466  | 33463803  | 338  | * | 3  | 1.8427E-12  | 0.210385992 | 0.000914131 | 0.009666617 | -0.097298961 | -0.029425553 | ACSS2                  |
| chr5  | 176747268 | 176748043 | 776  | * | 2  | 5.7581E-13  | 5.54479E-05 | 0.000914257 | 9.31845E-05 | -0.204283089 | -0.145712414 |                        |
| chr11 | 19263864  | 19264434  | 571  | * | 4  | 3.01003E-16 | 0.093374244 | 0.000914383 | 0.002490771 | -0.166971165 | -0.042045843 | RP11-428C19.4          |
| chr3  | 98312651  | 98313993  | 1343 | * | 7  | 2.01697E-25 | 0.005185245 | 0.000916388 | 0.000800189 | -0.243373322 | -0.033257492 |                        |
| chr10 | 121011103 | 121011644 | 542  | * | 2  | 1.44434E-12 | 0.000678459 | 0.000917004 | 0.000559749 | 0.137005039  | 0.122072357  | GRK5                   |
| chr11 | 111636425 | 111636595 | 171  | * | 2  | 8.1545E-12  | 0.026738236 | 0.000917951 | 0.002981551 | 0.03428834   | 0.015636449  | PPP2R1B                |
| chr1  | 116191397 | 116191657 | 261  | * | 2  | 2.41389E-15 | 6.83428E-06 | 0.000921841 | 1.59555E-05 | 0.187208828  | 0.178871552  | VANGL1                 |
| chr8  | 125827396 | 125828298 | 903  | * | 3  | 3.4696E-21  | 1.06235E-06 | 0.000922376 | 2.84931E-06 | -0.238745729 | -0.172582489 | RP11-1082L8.4          |
| chr16 | 11875806  | 11877212  | 1407 | * | 9  | 1.03245E-37 | 0.000133354 | 0.000927272 | 7.5365E-07  | 0.195191671  | 0.078764022  | ZC3H7A                 |
| chr11 | 64163330  | 64164279  | 950  | * | 6  | 1.20481E-29 | 7.77675E-06 | 0.000928576 | 7.75204E-07 | -0.188361312 | -0.080665687 |                        |
| chr4  | 184773853 | 184774543 | 691  | * | 5  | 2.02911E-26 | 0.000429554 | 0.000929098 | 5.56153E-06 | 0.194448328  | 0.113263619  |                        |
| chr9  | 71409257  | 71409959  | 703  | * | 3  | 1.68031E-16 | 0.000111704 | 0.000929361 | 0.000134783 | -0.293278358 | -0.060307885 | PIP5K1B                |
| chr12 | 133239966 | 133241537 | 1572 | * | 3  | 3.00804E-13 | 5.86996E-07 | 0.000929554 | 2.12464E-06 | -0.352130149 | -0.252487735 | POLE                   |
| chr11 | 10625668  | 10626235  | 568  | * | 4  | 4.38664E-14 | 0.012585449 | 0.00092964  | 0.001959067 | -0.378611941 | -0.106404972 | LYVE1, MRVI1           |
| chr6  | 111912751 | 111913206 | 456  | * | 2  | 3.61663E-11 | 0.032788733 | 0.000929804 | 0.003163872 | -0.341844217 | -0.180172731 | TRAF3IP2-AS1, TRAF3IP2 |
| chr2  | 46621477  | 46622721  | 1245 | * | 4  | 1.58099E-21 | 0.000682108 | 0.000930032 | 6.64969E-05 | -0.293542101 | -0.136556234 |                        |
| chr17 | 71064722  | 71065768  | 1047 | * | 3  | 2.00491E-19 | 4.01212E-08 | 0.000930659 | 2.17295E-07 | -0.278165429 | -0.178104969 | SLC39A11               |
| chr5  | 73399136  | 73399693  | 558  | * | 4  | 8.94919E-22 | 0.000147227 | 0.000931081 | 7.68298E-06 | -0.176355296 | -0.097277135 |                        |
| chr2  | 179395885 | 179396688 | 804  | * | 5  | 7.46171E-30 | 1.56981E-05 | 0.000931382 | 8.67579E-07 | -0.225007356 | -0.140222461 | TTN-AS1, TTN           |
| chr17 | 60972789  | 60973151  | 363  | * | 3  | 4.41709E-21 | 1.53714E-07 | 0.000933735 | 6.81119E-07 | -0.41605788  | -0.251458159 |                        |
| chr19 | 55385010  | 55385662  | 653  | * | 5  | 1.86682E-27 | 5.76661E-05 | 0.000934024 | 2.40792E-06 | -0.350120374 | -0.180789971 |                        |
| chr6  | 44019598  | 44020777  | 1180 | * | 3  | 1.50056E-15 | 0.002282487 | 0.000939081 | 0.001133944 | -0.160412167 | -0.077272571 | RP5-1120P11.1          |
| chr15 | 64456062  | 64456365  | 304  | * | 3  | 2.05339E-14 | 0.010421185 | 0.000940281 | 0.002723575 | -0.252014851 | -0.067486033 |                        |

|       |           |           |      |   |   |             |             |             |             |              |              |                       |
|-------|-----------|-----------|------|---|---|-------------|-------------|-------------|-------------|--------------|--------------|-----------------------|
| chr8  | 10236366  | 10236882  | 517  | * | 2 | 1.68732E-13 | 7.19612E-05 | 0.000940567 | 0.000115361 | 0.19182367   | 0.155554886  | MSRA                  |
| chr16 | 3014320   | 3015092   | 773  | * | 4 | 8.16776E-20 | 0.003518503 | 0.000940721 | 0.001419495 | -0.044273954 | -0.002341344 | KREMEN2               |
| chr1  | 184377004 | 184377525 | 522  | * | 3 | 2.00687E-12 | 0.056279451 | 0.000942088 | 0.005758217 | -0.245486414 | -0.08856252  | C1orf21, GS1-115G20.1 |
| chr16 | 89299756  | 89300741  | 986  | * | 3 | 2.3518E-17  | 9.97596E-06 | 0.000942297 | 1.61783E-05 | -0.372552477 | -0.189025522 |                       |
| chr12 | 27174164  | 27174721  | 558  | * | 5 | 2.89627E-22 | 0.004862971 | 0.000942299 | 0.000220503 | -0.274188082 | -0.093546407 |                       |
| chr12 | 124718401 | 124718939 | 539  | * | 3 | 1.22927E-14 | 0.001821717 | 0.000944965 | 0.00100376  | -0.310152755 | -0.139842059 | FAM101A               |
| chr15 | 52122389  | 52122580  | 192  | * | 3 | 4.57837E-15 | 0.006047162 | 0.000945344 | 0.002014192 | -0.046799226 | -0.015192529 | TMOD3                 |
| chr11 | 63331821  | 63332343  | 523  | * | 2 | 7.0191E-13  | 0.015013969 | 0.000946464 | 0.002580612 | 0.138929464  | 0.077040057  |                       |
| chr8  | 74582345  | 74582660  | 316  | * | 4 | 2.51024E-12 | 0.111332019 | 0.000946605 | 0.009612345 | -0.271322918 | -0.08216731  | STAU2                 |
| chr7  | 4752170   | 4753002   | 833  | * | 4 | 3.51333E-30 | 4.18164E-06 | 0.000946621 | 6.62818E-07 | -0.348199796 | -0.221837474 | FOXK1                 |
| chr2  | 86387377  | 86388045  | 669  | * | 4 | 1.49217E-13 | 0.078522171 | 0.000947657 | 0.007084594 | -0.243686328 | -0.075351891 | IMMT                  |
| chr22 | 30639611  | 30639979  | 369  | * | 4 | 1.73559E-12 | 0.310338819 | 0.000948429 | 0.020260861 | 0.164088623  | 0.040498578  | LIF                   |
| chr8  | 29914021  | 29914060  | 40   | * | 2 | 2.25114E-15 | 5.7978E-06  | 0.000948786 | 1.38373E-05 | -0.33706981  | -0.29629683  |                       |
| chr19 | 9907044   | 9907569   | 526  | * | 3 | 4.60702E-16 | 0.000158692 | 0.00094906  | 6.9462E-05  | -0.231835212 | -0.148474619 | CTD-2623N2.5          |
| chr17 | 38077703  | 38077870  | 168  | * | 2 | 1.39301E-14 | 1.2675E-05  | 0.000949062 | 2.75687E-05 | -0.249717615 | -0.17787657  | ORMDL3                |
| chr16 | 30976186  | 30976273  | 88   | * | 2 | 3.74782E-11 | 0.002065303 | 0.000949437 | 0.001090747 | -0.246968866 | -0.134243391 | SETD1A                |
| chr14 | 21510056  | 21510384  | 329  | * | 4 | 3.85521E-13 | 0.519929579 | 0.00095034  | 0.024441091 | -0.172773328 | -0.044702478 | NDRG2                 |
| chr2  | 9427798   | 9428037   | 240  | * | 2 | 3.81011E-12 | 0.015863677 | 0.000950687 | 0.002635434 | 0.159480634  | 0.052089148  | ASAP2                 |
| chr5  | 33229162  | 33229692  | 531  | * | 2 | 1.30701E-11 | 0.063759544 | 0.000950952 | 0.003655768 | 0.20149339   | 0.093790929  | CTD-2066L21.3         |
| chr3  | 71151690  | 71151744  | 55   | * | 2 | 2.90501E-14 | 1.89381E-05 | 0.0009514   | 3.89212E-05 | -0.319836806 | -0.252020235 | FOXP1                 |
| chr14 | 21372793  | 21373109  | 317  | * | 2 | 9.20292E-12 | 0.000603782 | 0.000952519 | 0.000529283 | -0.24730977  | -0.141364437 | RP11-219E7.4          |
| chr21 | 44473496  | 44474019  | 524  | * | 5 | 8.39883E-22 | 3.87769E-05 | 0.000953489 | 2.9975E-05  | -0.394784983 | -0.163770248 | CBS                   |
| chr2  | 26835353  | 26835566  | 214  | * | 2 | 6.36043E-10 | 0.179532299 | 0.000953514 | 0.004043213 | -0.255475398 | -0.126282087 | CIB4                  |
| chr11 | 1776289   | 1776688   | 400  | * | 2 | 2.11161E-14 | 4.70377E-05 | 0.000953714 | 8.26779E-05 | -0.212128682 | -0.180751753 | RP11-295K3.1, CTSD    |
| chr3  | 114936863 | 114937219 | 357  | * | 2 | 1.2406E-10  | 0.028334887 | 0.000954637 | 0.003118644 | -0.358773065 | -0.170116051 |                       |
| chr16 | 11199143  | 11199192  | 50   | * | 2 | 8.09338E-11 | 0.000986156 | 0.000955282 | 0.000718684 | -0.070221193 | -0.043238677 | CLEC16A               |
| chr4  | 47466696  | 47467252  | 557  | * | 4 | 5.25089E-16 | 0.054004894 | 0.000955701 | 0.002628135 | -0.30574256  | -0.102046018 |                       |
| chr10 | 75530708  | 75530718  | 11   | * | 2 | 3.61728E-12 | 0.006544354 | 0.000957421 | 0.001906708 | -0.155864106 | -0.091620987 | SEC24C                |
| chr1  | 203561580 | 203562914 | 1335 | * | 4 | 1.98188E-22 | 1.11499E-05 | 0.000959571 | 9.23722E-06 | -0.379570605 | -0.195333377 |                       |

|       |           |           |      |   |   |             |             |             |             |              |              |                         |
|-------|-----------|-----------|------|---|---|-------------|-------------|-------------|-------------|--------------|--------------|-------------------------|
| chr1  | 16292047  | 16292746  | 700  | * | 2 | 8.6529E-13  | 0.000161627 | 0.000960926 | 0.000214464 | -0.360022397 | -0.223899522 | ZBTB17                  |
| chr8  | 29624720  | 29624883  | 164  | * | 2 | 5.77478E-10 | 0.015069676 | 0.000962104 | 0.002614757 | -0.166388976 | -0.094495607 | AC145110.1              |
| chr2  | 9430153   | 9430274   | 122  | * | 2 | 2.16786E-10 | 0.003760348 | 0.000962989 | 0.001491119 | 0.225175419  | 0.100262953  | ASAP2                   |
| chr14 | 76880315  | 76880784  | 470  | * | 2 | 2.08501E-11 | 0.006064422 | 0.000963184 | 0.001853244 | 0.043004902  | 0.038352829  | ESRRB                   |
| chr1  | 31544059  | 31544293  | 235  | * | 2 | 6.0451E-11  | 0.001662009 | 0.000964238 | 0.000977089 | -0.18558169  | -0.099094542 |                         |
| chr6  | 20483859  | 20484204  | 346  | * | 2 | 5.66725E-15 | 8.93936E-06 | 0.000964405 | 2.03786E-05 | -0.330029322 | -0.267168991 | E2F3                    |
| chr8  | 29230547  | 29230998  | 452  | * | 3 | 1.00363E-13 | 0.013467726 | 0.000967699 | 0.003286183 | -0.159828002 | -0.070902989 |                         |
| chr22 | 37428975  | 37429269  | 295  | * | 2 | 3.11615E-15 | 6.58377E-06 | 0.000967973 | 1.55476E-05 | -0.22445875  | -0.211507164 |                         |
| chr6  | 37024066  | 37024255  | 190  | * | 2 | 2.48642E-10 | 0.06154573  | 0.000968575 | 0.003691643 | -0.189794244 | -0.090343302 |                         |
| chr3  | 184292880 | 184294106 | 1227 | * | 3 | 1.56613E-15 | 0.000314107 | 0.00096968  | 4.69938E-05 | -0.262616948 | -0.155388033 | EIF2B5, EPHB3           |
| chr7  | 971027    | 971767    | 741  | * | 4 | 1.1442E-21  | 4.90442E-05 | 0.000970102 | 7.4078E-06  | -0.306893664 | -0.176426225 | ADAP1, COX19            |
| chr21 | 22400862  | 22401770  | 909  | * | 2 | 6.00281E-12 | 8.82551E-06 | 0.000970517 | 2.01705E-05 | -0.169446661 | -0.159781909 | NCAM2                   |
| chr19 | 35465641  | 35466896  | 1256 | * | 3 | 5.92935E-17 | 3.80117E-07 | 0.000970961 | 1.55111E-06 | -0.334483855 | -0.202832077 |                         |
| chr16 | 68826954  | 68827444  | 491  | * | 2 | 2.14933E-11 | 0.007961807 | 0.00097447  | 0.002091239 | -0.321413669 | -0.168227917 | CDH1                    |
| chr19 | 38760771  | 38761503  | 733  | * | 2 | 8.11668E-15 | 8.16899E-06 | 0.00097708  | 1.88597E-05 | 0.214631128  | 0.203671766  | SPINT2                  |
| chr6  | 34663155  | 34664215  | 1061 | * | 3 | 2.3748E-13  | 0.000339286 | 0.00097754  | 0.000344696 | -0.088625599 | -0.028326881 | RP11-140K17.3, C6orf106 |
| chr12 | 6948846   | 6949472   | 627  | * | 5 | 2.32166E-19 | 0.001601984 | 0.000978238 | 0.001095303 | 0.158173638  | 0.057908216  | LEPREL2, GNB3           |
| chr2  | 157262176 | 157262380 | 205  | * | 2 | 3.55615E-14 | 1.79686E-05 | 0.000978376 | 3.74356E-05 | -0.322603347 | -0.236080687 |                         |
| chr10 | 51487545  | 51487759  | 215  | * | 5 | 2.94434E-13 | 0.086841812 | 0.000980184 | 0.007465662 | -0.16549682  | -0.044173764 |                         |
| chr7  | 155150015 | 155151427 | 1413 | * | 6 | 1.38132E-30 | 0.000818548 | 0.000980403 | 4.27506E-06 | -0.286304801 | -0.148920569 | BLACE                   |
| chr6  | 17930180  | 17930519  | 340  | * | 2 | 4.86947E-15 | 8.62585E-06 | 0.000980473 | 1.98001E-05 | -0.242413844 | -0.18483982  | KIF13A                  |
| chr2  | 8799821   | 8800129   | 309  | * | 2 | 1.22527E-11 | 0.002962343 | 0.000981198 | 0.001341194 | -0.165213225 | -0.064690031 |                         |
| chr1  | 28449602  | 28450028  | 427  | * | 2 | 1.23237E-11 | 0.001552308 | 0.000981469 | 0.000949513 | -0.337353602 | -0.13845353  |                         |
| chr16 | 19589790  | 19590554  | 765  | * | 5 | 5.2113E-20  | 0.014663983 | 0.000982147 | 0.000492972 | -0.200425405 | -0.074165107 | C16orf62                |
| chr10 | 92680914  | 92681505  | 592  | * | 3 | 1.69109E-12 | 0.049938871 | 0.000982447 | 0.00590787  | -0.203495514 | -0.049135156 | ANKRD1                  |
| chr10 | 98899484  | 98900495  | 1012 | * | 3 | 1.53308E-14 | 0.468829476 | 0.000984013 | 0.012457497 | -0.262325175 | -0.086990633 | SLIT1, ARHGAP19-SLIT1   |
| chr12 | 7046277   | 7047250   | 974  | * | 4 | 7.06829E-15 | 0.01372439  | 0.00098517  | 0.003906665 | 0.041426758  | 0.001147312  | ATN1                    |
| chr19 | 43856494  | 43857874  | 1381 | * | 8 | 4.42731E-32 | 1.81638E-05 | 0.000986138 | 4.03628E-06 | -0.340254206 | -0.099005339 | CD177                   |
| chr19 | 574762    | 575412    | 651  | * | 5 | 3.35024E-32 | 5.69027E-09 | 0.000986418 | 1.51934E-08 | 0.213586474  | 0.137752572  | BSG                     |

|       |           |           |      |   |   |             |             |             |             |              |              |                     |
|-------|-----------|-----------|------|---|---|-------------|-------------|-------------|-------------|--------------|--------------|---------------------|
| chr11 | 44976423  | 44977160  | 738  | * | 2 | 4.50431E-13 | 3.18702E-05 | 0.000987177 | 6.07109E-05 | -0.315129665 | -0.206477094 |                     |
| chr1  | 2090814   | 2090849   | 36   | * | 2 | 8.87797E-14 | 0.000168445 | 0.000987382 | 0.000223242 | -0.244310854 | -0.224464045 | PRKCZ               |
| chr8  | 1807993   | 1808475   | 483  | * | 2 | 6.24939E-13 | 0.06586434  | 0.000988121 | 0.00379214  | 0.160807935  | 0.079328784  | ARHGEF10            |
| chr15 | 56201496  | 56201688  | 193  | * | 2 | 8.50158E-10 | 0.569116462 | 0.00098819  | 0.004256638 | -0.265388785 | -0.132767479 | NEDD4               |
| chr1  | 59510738  | 59511602  | 865  | * | 2 | 4.68579E-12 | 0.000146379 | 0.000989233 | 0.000201416 | 0.152235239  | 0.116619243  |                     |
| chr5  | 76028910  | 76029522  | 613  | * | 3 | 7.76835E-13 | 0.02811182  | 0.000990147 | 0.00376486  | 0.098290817  | 0.036374422  | F2R                 |
| chr10 | 50594340  | 50595181  | 842  | * | 2 | 5.86921E-13 | 8.7771E-06  | 0.000990951 | 2.01408E-05 | -0.310955787 | -0.097253421 | DRGX                |
| chr17 | 60142491  | 60142985  | 495  | * | 3 | 1.39824E-16 | 0.004728985 | 0.000991212 | 0.000714401 | 0.030321824  | 0.001254695  | MED13               |
| chr11 | 450652    | 451101    | 450  | * | 3 | 8.11729E-15 | 0.088473038 | 0.000991217 | 0.007664415 | 0.043546429  | 0.016761581  | PTDSS2              |
| chr1  | 116460862 | 116460865 | 4    | * | 2 | 1.07943E-11 | 0.000217517 | 0.000991464 | 0.000269103 | -0.161137128 | -0.124519604 |                     |
| chr11 | 133995070 | 133995787 | 718  | * | 2 | 9.62158E-13 | 0.001030485 | 0.000991613 | 0.00075198  | 0.243239333  | 0.155122455  | JAM3                |
| chr19 | 54566838  | 54567279  | 442  | * | 6 | 4.16233E-15 | 0.12756884  | 0.000993321 | 0.024854388 | -0.377301013 | -0.072421659 | VSTM1               |
| chr3  | 31728749  | 31729018  | 270  | * | 2 | 1.17742E-10 | 0.003451256 | 0.000993401 | 0.001457816 | -0.299146267 | -0.157917082 | OSBPL10             |
| chr3  | 39254882  | 39255676  | 795  | * | 6 | 6.86923E-15 | 0.575573815 | 0.000993598 | 0.048540153 | -0.274690477 | -0.046521827 |                     |
| chr16 | 28020418  | 28020812  | 395  | * | 2 | 5.10907E-11 | 0.005967472 | 0.000993808 | 0.001878396 | -0.225387478 | -0.097682106 | GSG1L               |
| chr8  | 134143217 | 134143581 | 365  | * | 2 | 4.45307E-11 | 0.117192624 | 0.000994625 | 0.004078136 | -0.237707282 | -0.11905458  | TG                  |
| chr1  | 169600039 | 169600704 | 666  | * | 4 | 3.80125E-15 | 0.200931354 | 0.000994936 | 0.00369077  | 0.142413285  | 0.058500571  |                     |
| chr16 | 86756180  | 86756774  | 595  | * | 3 | 4.31474E-13 | 0.061316053 | 0.000996679 | 0.00662385  | -0.139589125 | -0.043006325 | CTD-2015G9.2        |
| chr3  | 52220172  | 52220370  | 199  | * | 2 | 3.8457E-10  | 0.007699909 | 0.000997721 | 0.002096243 | -0.260882365 | -0.147858464 |                     |
| chr12 | 720995    | 721502    | 508  | * | 4 | 4.76913E-23 | 1.42911E-06 | 0.000997993 | 6.78361E-07 | -0.316261457 | -0.19066666  | NINJ2               |
| chr3  | 186692377 | 186692770 | 394  | * | 2 | 6.23104E-12 | 0.00253127  | 0.000998539 | 0.001250125 | -0.182149222 | -0.054474732 | ST6GAL1             |
| chr15 | 40623714  | 40624103  | 390  | * | 4 | 9.37215E-19 | 0.001684513 | 0.001001436 | 7.16967E-05 | 0.172789583  | 0.084458208  | C15orf52, RNA5SP392 |
| chr3  | 171964315 | 171965350 | 1036 | * | 4 | 2.58459E-13 | 0.305020306 | 0.001001789 | 0.019092967 | -0.356243685 | -0.076105598 | FNDC3B              |
| chr12 | 47477069  | 47477223  | 155  | * | 2 | 2.43958E-14 | 1.40703E-05 | 0.001001823 | 3.04831E-05 | -0.257259625 | -0.085550845 | PCED1B              |
| chr17 | 4081325   | 4082271   | 947  | * | 5 | 1.95428E-24 | 2.08145E-06 | 0.001001871 | 9.90815E-07 | -0.425364375 | -0.161800912 | CYB5D2, ANKFY1      |
| chr17 | 45943858  | 45944921  | 1064 | * | 4 | 5.08694E-13 | 0.19177627  | 0.001002184 | 0.013650727 | 0.111725633  | 0.027174664  |                     |
| chr16 | 87470083  | 87471211  | 1129 | * | 6 | 1.18716E-23 | 0.000124613 | 0.00100299  | 0.000106956 | 0.210156361  | 0.084315001  | ZCCHC14             |
| chr11 | 6631411   | 6632072   | 662  | * | 3 | 2.35766E-13 | 0.198376735 | 0.001003109 | 0.007872983 | 0.220294301  | 0.085322567  | ILK, TAF10          |
| chr17 | 78681826  | 78683457  | 1632 | * | 7 | 4.7952E-26  | 0.000102872 | 0.00100382  | 7.13145E-07 | -0.332539628 | -0.138286555 | RPTOR               |

|       |           |           |      |   |    |             |             |             |             |              |              |                      |
|-------|-----------|-----------|------|---|----|-------------|-------------|-------------|-------------|--------------|--------------|----------------------|
| chr2  | 60755743  | 60756422  | 680  | * | 2  | 6.53684E-14 | 2.4222E-05  | 0.00100501  | 4.84897E-05 | -0.163138399 | -0.148625415 | BCL11A               |
| chr2  | 106010000 | 106010271 | 272  | * | 2  | 3.56039E-10 | 0.023195865 | 0.001005087 | 0.003077485 | 0.156809068  | 0.082871128  | FHL2                 |
| chr15 | 91304710  | 91306100  | 1391 | * | 7  | 1.41578E-37 | 3.03742E-07 | 0.001007134 | 1.28793E-09 | -0.272582965 | -0.165181776 | BLM                  |
| chr13 | 99174312  | 99175893  | 1582 | * | 11 | 4.14688E-19 | 0.008409634 | 0.001009016 | 0.000660231 | 0.171010539  | 0.070709352  | STK24                |
| chr17 | 34931841  | 34932199  | 359  | * | 2  | 5.25884E-12 | 0.025050878 | 0.001009328 | 0.003152986 | 0.143247338  | 0.076875672  | GGNBP2               |
| chr7  | 158497997 | 158498010 | 14   | * | 2  | 1.87118E-10 | 0.008102155 | 0.001010583 | 0.002158382 | 0.02763409   | 0.016404817  |                      |
| chr4  | 7636841   | 7638222   | 1382 | * | 6  | 2.1004E-33  | 0.000485642 | 0.00101093  | 2.49935E-07 | -0.297776017 | -0.14150494  | SORCS2               |
| chr3  | 195973977 | 195974349 | 373  | * | 4  | 2.18357E-12 | 0.333935672 | 0.001011139 | 0.021636606 | -0.397015733 | -0.098070748 | PCYT1A               |
| chr2  | 64680053  | 64681012  | 960  | * | 3  | 2.55375E-16 | 0.015273044 | 0.001011387 | 0.003567782 | -0.210459455 | -0.068165739 | AC008074.3           |
| chr2  | 219222315 | 219223002 | 688  | * | 4  | 1.69022E-21 | 0.001920497 | 0.001011599 | 8.01596E-05 | -0.330601807 | -0.131264535 | C2orf62, AC021016.8  |
| chr1  | 174924851 | 174924874 | 24   | * | 2  | 2.50748E-10 | 0.016876533 | 0.001011833 | 0.002813569 | -0.227270819 | -0.123680066 | RABGAP1L             |
| chr9  | 136892128 | 136892236 | 109  | * | 2  | 7.0739E-11  | 0.189281803 | 0.00101236  | 0.004270124 | -0.132274115 | -0.064985789 | LINC00094            |
| chr2  | 174888959 | 174890570 | 1612 | * | 9  | 1.40516E-31 | 2.93551E-07 | 0.001012697 | 1.0561E-07  | -0.296898457 | -0.114001852 | RP11-394I13.1        |
| chr17 | 17311855  | 17311866  | 12   | * | 2  | 2.30828E-15 | 6.46349E-06 | 0.001013104 | 1.53949E-05 | -0.314222501 | -0.302243131 |                      |
| chr17 | 7379681   | 7380112   | 432  | * | 2  | 5.95388E-11 | 0.033112529 | 0.001013747 | 0.00339384  | 0.201855606  | 0.104678119  | ZBTB4                |
| chr10 | 114816211 | 114816714 | 504  | * | 2  | 5.77341E-13 | 0.000145964 | 0.001014031 | 0.000202739 | -0.130464088 | -0.012028    | TCF7L2               |
| chr2  | 152213504 | 152214177 | 674  | * | 4  | 1.89119E-20 | 0.016743066 | 0.001014385 | 0.000193373 | -0.293211042 | -0.149458946 | TNFAIP6              |
| chr17 | 39653832  | 39654883  | 1052 | * | 5  | 8.25238E-28 | 4.92224E-06 | 0.001016343 | 7.88647E-07 | -0.375122523 | -0.179413573 |                      |
| chr19 | 11349627  | 11350165  | 539  | * | 7  | 1.57064E-28 | 4.3447E-05  | 0.001016753 | 3.81605E-06 | -0.22103908  | -0.087223305 | C19orf80, DOCK6      |
| chr2  | 16059290  | 16059540  | 251  | * | 2  | 2.41742E-11 | 0.028215383 | 0.001017405 | 0.003272679 | 0.119065373  | 0.052992773  |                      |
| chr16 | 24989622  | 24989925  | 304  | * | 3  | 9.88604E-12 | 0.015645139 | 0.001018663 | 0.003465027 | 0.181342571  | 0.074773111  | ARHGAP17             |
| chr3  | 66500294  | 66500703  | 410  | * | 2  | 1.32996E-10 | 0.064703379 | 0.001020763 | 0.003885048 | -0.168778596 | -0.081256946 | LRIG1                |
| chr2  | 208939532 | 208939842 | 311  | * | 2  | 1.30056E-12 | 0.000401358 | 0.001021462 | 0.000417345 | -0.146770884 | -0.11045619  |                      |
| chr9  | 100130105 | 100130170 | 66   | * | 2  | 6.11354E-14 | 2.12971E-05 | 0.001022161 | 4.36541E-05 | 0.173457842  | 0.149864185  | CCDC180, RP11-23J9.4 |
| chr22 | 39788527  | 39788876  | 350  | * | 2  | 2.47974E-10 | 0.043284838 | 0.001025348 | 0.003630892 | -0.251321109 | -0.13180182  |                      |
| chr2  | 160068293 | 160068902 | 610  | * | 3  | 3.21775E-18 | 0.000324436 | 0.001025601 | 4.23529E-05 | 0.150514838  | 0.095803028  | TANC1                |
| chr12 | 15125458  | 15126020  | 563  | * | 3  | 1.50747E-15 | 0.001829492 | 0.001026268 | 0.001072693 | 0.161100273  | 0.031363401  | PDE6H                |
| chr7  | 101460955 | 101461188 | 234  | * | 2  | 5.34254E-13 | 0.000231752 | 0.001026927 | 0.000285401 | -0.135308101 | -0.087686716 | CUX1                 |
| chr14 | 105157570 | 105157713 | 144  | * | 4  | 2.51999E-21 | 1.29587E-06 | 0.001026983 | 4.68763E-06 | 0.161365922  | 0.131348969  | INF2, RP11-982M15.5  |

|       |           |           |      |   |    |             |             |             |             |              |              |                                                |
|-------|-----------|-----------|------|---|----|-------------|-------------|-------------|-------------|--------------|--------------|------------------------------------------------|
| chr3  | 188149132 | 188150137 | 1006 | * | 3  | 9.55123E-13 | 0.261649457 | 0.00102894  | 0.011323979 | -0.289652089 | -0.102281254 | LPP                                            |
| chr3  | 171611793 | 171612219 | 427  | * | 4  | 2.37944E-14 | 0.01728483  | 0.001030936 | 0.001458499 | -0.359506448 | -0.113753888 | TMEM212, TMEM212-AS1                           |
| chr4  | 140098382 | 140099401 | 1020 | * | 7  | 4.52121E-33 | 7.05747E-07 | 0.001031003 | 2.52986E-07 | -0.088685911 | -0.033814202 |                                                |
| chr7  | 44674851  | 44675025  | 175  | * | 2  | 3.35716E-12 | 0.000128289 | 0.001033092 | 0.00018524  | 0.177875727  | 0.177627082  | OGDH                                           |
| chr16 | 58914220  | 58914345  | 126  | * | 3  | 1.38131E-16 | 8.78603E-05 | 0.001036552 | 2.98635E-05 | -0.2736314   | -0.187251078 | RP11-410D17.2                                  |
| chr12 | 13248548  | 13248988  | 441  | * | 3  | 8.38636E-15 | 0.005217996 | 0.001036971 | 0.001190617 | -0.336282275 | -0.086914555 | KIAA1467, GSG1                                 |
| chr8  | 125951226 | 125951852 | 627  | * | 2  | 3.43654E-14 | 7.92015E-05 | 0.00103825  | 0.000128097 | 0.236915438  | 0.197388112  | LINC00964, RP11-1082L8.2                       |
| chr19 | 11406819  | 11406993  | 175  | * | 2  | 1.87186E-14 | 0.000139281 | 0.00103866  | 0.000197399 | -0.125363538 | -0.102992417 | TSPAN16                                        |
| chr18 | 19383644  | 19383957  | 314  | * | 2  | 1.66909E-12 | 0.000129504 | 0.001039209 | 0.000186932 | -0.267919927 | -0.204384913 | MIB1                                           |
| chr1  | 167520506 | 167520923 | 418  | * | 2  | 1.22704E-12 | 0.001154099 | 0.001039885 | 0.000824331 | -0.236220408 | -0.137590989 | CREG1                                          |
| chr22 | 21076017  | 21076342  | 326  | * | 2  | 1.02161E-11 | 0.010718502 | 0.00104     | 0.002453319 | -0.356620726 | -0.173442616 | PI4KA                                          |
| chr11 | 46258039  | 46258826  | 788  | * | 3  | 1.8781E-22  | 2.47019E-07 | 0.001040405 | 1.04402E-06 | -0.177607383 | -0.155686761 |                                                |
| chr9  | 3256732   | 3257397   | 666  | * | 3  | 1.58358E-15 | 0.000264815 | 0.001041096 | 9.81677E-05 | -0.347363794 | -0.195884202 | RFX3                                           |
| chr1  | 178252770 | 178253267 | 498  | * | 2  | 1.4555E-13  | 4.17188E-05 | 0.001042015 | 7.67762E-05 | -0.340192824 | -0.218549164 | RASAL2                                         |
| chr15 | 90769027  | 90769260  | 234  | * | 2  | 5.10618E-11 | 0.095500484 | 0.001042883 | 0.004162107 | -0.163572748 | -0.082610235 | SEMA4B                                         |
| chr15 | 39746976  | 39747399  | 424  | * | 2  | 2.84975E-12 | 0.001368289 | 0.001043308 | 0.000912597 | -0.260290559 | -0.148813376 |                                                |
| chr2  | 113012287 | 113013820 | 1534 | * | 10 | 1.05688E-26 | 0.13813795  | 0.001045163 | 0.000691348 | -0.31178184  | -0.040818893 | ZC3H8                                          |
| chr11 | 47428611  | 47429159  | 549  | * | 2  | 3.67624E-14 | 0.013042892 | 0.001045553 | 0.002643607 | -0.236058686 | -0.121569983 | SLC39A13, RP11-750H9.5                         |
| chr5  | 177889945 | 177890603 | 659  | * | 3  | 4.95893E-16 | 0.009350946 | 0.001045703 | 0.000639079 | -0.277089417 | -0.122524516 | COL23A1                                        |
| chr15 | 64208035  | 64208452  | 418  | * | 2  | 2.11952E-11 | 0.009044591 | 0.001045802 | 0.002307835 | 0.147044304  | 0.097481688  | DAPK2                                          |
| chr3  | 99832772  | 99833293  | 522  | * | 3  | 1.87607E-16 | 9.27807E-05 | 0.001046703 | 0.000128062 | -0.242055737 | -0.088036677 | CMSS1, FILIP1L                                 |
| chr12 | 121091775 | 121091847 | 73   | * | 2  | 3.04592E-10 | 0.016725819 | 0.001050336 | 0.002883309 | 0.141322662  | 0.073654238  | CABP1                                          |
| chr8  | 130695235 | 130696901 | 1667 | * | 7  | 2.4481E-41  | 6.6231E-12  | 0.001050395 | 2.52551E-11 | -0.316415567 | -0.217705851 | RP11-419K12.1                                  |
| chr7  | 151504844 | 151505116 | 273  | * | 3  | 1.12443E-13 | 0.004291022 | 0.001053573 | 0.001821927 | -0.330406165 | -0.130231221 | RP13-452N2.1, PRKAG2                           |
| chr1  | 12493605  | 12494280  | 676  | * | 3  | 2.38295E-12 | 0.005640585 | 0.001053857 | 0.002153202 | 0.203747434  | 0.106295456  | VPS13D                                         |
| chr10 | 519360    | 519456    | 97   | * | 2  | 1.86261E-15 | 4.21247E-05 | 0.001054475 | 7.76202E-05 | 0.180038875  | 0.171654427  | DIP2C                                          |
| chr10 | 81030244  | 81030727  | 484  | * | 2  | 1.86023E-12 | 0.000251965 | 0.001055048 | 0.000306108 | -0.279932104 | -0.104458803 | ZMIZ1                                          |
| chr21 | 44588272  | 44588747  | 476  | * | 5  | 6.0778E-17  | 0.370540074 | 0.001055176 | 0.036194878 | -0.153915245 | -0.037588104 |                                                |
| chr3  | 52001426  | 52002969  | 1544 | * | 14 | 1.75294E-30 | 0.000998838 | 0.001056861 | 0.000119793 | -0.295335517 | -0.03432891  | PCBP4, RP11-155D18.14, RP11-155D18.12, ABHD14B |

|       |           |           |      |   |    |             |             |             |             |              |              |                            |
|-------|-----------|-----------|------|---|----|-------------|-------------|-------------|-------------|--------------|--------------|----------------------------|
| chr10 | 125187143 | 125187216 | 74   | * | 2  | 8.51455E-15 | 2.02048E-05 | 0.001058704 | 4.20484E-05 | -0.255480747 | -0.194735821 | RP11-282I1.1, RP11-338O1.2 |
| chr17 | 64298763  | 64299562  | 800  | * | 5  | 2.01948E-16 | 0.003850948 | 0.00106049  | 0.001836931 | 0.033002668  | 0.006366543  | PRKCA                      |
| chr8  | 124890314 | 124890680 | 367  | * | 3  | 2.67491E-11 | 0.022612573 | 0.001063583 | 0.003902301 | -0.313117423 | -0.106926223 | FER1L6                     |
| chr16 | 85028515  | 85028831  | 317  | * | 2  | 1.16952E-13 | 0.000223589 | 0.001064314 | 0.000281953 | -0.154759247 | -0.112295317 | ZDHHC7                     |
| chr11 | 107710989 | 107711373 | 385  | * | 2  | 1.86661E-12 | 0.058031393 | 0.001064369 | 0.003951306 | -0.299498995 | -0.147478631 | SLC35F2                    |
| chr10 | 106081758 | 106082244 | 487  | * | 2  | 1.33441E-12 | 0.000177163 | 0.001064872 | 0.000238059 | -0.215158634 | -0.157840397 | ITPRIP                     |
| chr7  | 2184839   | 2186344   | 1506 | * | 7  | 1.3443E-27  | 0.062562333 | 0.001064903 | 0.000441282 | -0.3611717   | -0.07887463  | MAD1L1                     |
| chr5  | 148421136 | 148422395 | 1260 | * | 5  | 5.4016E-26  | 5.17567E-06 | 0.001065578 | 2.01542E-07 | -0.232496806 | 0.0605412    | SH3TC2                     |
| chr17 | 79124325  | 79125029  | 705  | * | 2  | 3.41834E-13 | 1.41541E-05 | 0.001070389 | 3.10172E-05 | -0.305805513 | -0.239422383 | AATK                       |
| chr11 | 88078288  | 88078629  | 342  | * | 2  | 8.53893E-11 | 0.002898842 | 0.001071323 | 0.001397052 | -0.232500459 | -0.162374078 |                            |
| chr22 | 29139874  | 29140725  | 852  | * | 4  | 1.08913E-18 | 0.000588995 | 0.001071588 | 0.000165338 | -0.196880788 | -0.00189053  | HSCB                       |
| chr13 | 52973203  | 52973481  | 279  | * | 2  | 2.28985E-10 | 0.153175159 | 0.001072486 | 0.004438902 | -0.276225322 | -0.138758396 | THSD1                      |
| chr11 | 129912137 | 129912579 | 443  | * | 5  | 3.22795E-14 | 0.132747166 | 0.001073775 | 0.010538251 | -0.283974396 | -0.069483466 |                            |
| chr15 | 52711232  | 52711819  | 588  | * | 2  | 2.7318E-12  | 0.000757372 | 0.00107407  | 0.000646832 | -0.22019953  | -0.133676374 | MYO5A                      |
| chr2  | 61407270  | 61407414  | 145  | * | 2  | 2.91843E-16 | 7.65699E-06 | 0.001074293 | 1.80651E-05 | 0.1756956    | 0.136465812  | AHSA2                      |
| chr12 | 96389412  | 96391252  | 1841 | * | 14 | 7.13516E-58 | 1.67102E-05 | 0.00107432  | 2.51365E-08 | -0.37152102  | -0.10395138  | RP11-256L6.3, HAL          |
| chr17 | 2937203   | 2937884   | 682  | * | 4  | 1.99215E-12 | 0.13491016  | 0.001074922 | 0.014463015 | 0.210346494  | 0.057505909  | RAP1GAP2                   |
| chr19 | 42706353  | 42706800  | 448  | * | 2  | 1.04996E-13 | 3.29148E-05 | 0.001076711 | 6.3658E-05  | -0.227012441 | -0.17697192  | DEDD2                      |
| chr2  | 201593074 | 201593511 | 438  | * | 2  | 1.28917E-11 | 0.013005052 | 0.001077079 | 0.002697229 | -0.283638395 | -0.15130654  | AOX3P, AOX2P, AC007163.3   |
| chr12 | 65014995  | 65015547  | 553  | * | 3  | 1.59472E-12 | 0.081038468 | 0.001077167 | 0.007143363 | -0.296665684 | -0.110180059 | RASSF3                     |
| chr15 | 66947167  | 66947617  | 451  | * | 6  | 8.0568E-29  | 3.61296E-08 | 0.001078818 | 1.03765E-07 | 0.264741835  | 0.181133457  | RP11-321F6.1               |
| chr1  | 1695247   | 1695585   | 339  | * | 3  | 8.36341E-17 | 2.43454E-05 | 0.001080055 | 3.8884E-05  | -0.211092994 | -0.093774555 | NADK                       |
| chr6  | 30296689  | 30297941  | 1253 | * | 12 | 4.14858E-68 | 2.08727E-14 | 0.001080713 | 2.14025E-15 | -0.358649479 | -0.189321134 | TRIM39, TRIM39-RPP21       |
| chr2  | 85629084  | 85629337  | 254  | * | 2  | 2.4784E-14  | 1.30441E-05 | 0.001081009 | 2.89395E-05 | -0.241173081 | -0.199923598 | CAPG                       |
| chr1  | 20914028  | 20916179  | 2152 | * | 11 | 1.33699E-31 | 2.55215E-06 | 0.001081298 | 3.93801E-09 | -0.329023843 | -0.082725578 | CDA                        |
| chr7  | 2874522   | 2874595   | 74   | * | 2  | 2.05867E-09 | 0.0213264   | 0.001081916 | 0.00317581  | -0.248633811 | -0.133311231 | GNA12                      |
| chr20 | 61582596  | 61582921  | 326  | * | 2  | 6.39698E-13 | 0.045189183 | 0.001082851 | 0.003826209 | -0.354968409 | -0.173668478 |                            |
| chr1  | 113464716 | 113465091 | 376  | * | 2  | 2.18118E-13 | 0.006702664 | 0.00108481  | 0.00209118  | 0.175101336  | 0.0798895    | SLC16A1                    |
| chr1  | 19407878  | 19409764  | 1887 | * | 7  | 2.1147E-26  | 8.08286E-06 | 0.001087048 | 1.45596E-06 | -0.270710957 | -0.102730663 | UBR4                       |



|       |           |           |      |   |    |             |             |             |             |              |              |                               |
|-------|-----------|-----------|------|---|----|-------------|-------------|-------------|-------------|--------------|--------------|-------------------------------|
| chr20 | 4172792   | 4173535   | 744  | * | 4  | 1.12934E-20 | 6.93955E-07 | 0.001090358 | 8.32883E-07 | 0.211653015  | 0.045142616  |                               |
| chr18 | 9849810   | 9850143   | 334  | * | 2  | 3.2675E-10  | 0.033014413 | 0.001090526 | 0.003590623 | -0.183961287 | -0.099562118 | RAB31                         |
| chr20 | 49067744  | 49068130  | 387  | * | 2  | 2.76876E-14 | 2.16259E-05 | 0.00109114  | 4.48333E-05 | -0.199533718 | -0.143248527 |                               |
| chr16 | 48222834  | 48222917  | 84   | * | 2  | 1.99835E-09 | 0.079319195 | 0.001091239 | 0.004227761 | -0.212949576 | -0.109981022 | ABCC11                        |
| chr15 | 75319403  | 75320365  | 963  | * | 3  | 4.49361E-16 | 0.005632046 | 0.001091808 | 0.002008424 | 0.228875915  | 0.084099034  | PPCDC                         |
| chr13 | 53601944  | 53603286  | 1343 | * | 7  | 8.4375E-23  | 0.072986758 | 0.001093374 | 0.000906256 | -0.314712376 | -0.075596642 | OLFM4                         |
| chr10 | 73497514  | 73499076  | 1563 | * | 8  | 1.3977E-18  | 0.000308104 | 0.001093781 | 2.97793E-05 | -0.313429618 | -0.092823886 | CDH23, C10orf105              |
| chr1  | 226848569 | 226849798 | 1230 | * | 5  | 8.93698E-24 | 5.45306E-05 | 0.001094249 | 1.03338E-05 | -0.18406372  | -0.026233425 | ITPKB, ITPKB-IT1              |
| chr12 | 90234041  | 90234391  | 351  | * | 2  | 1.17474E-10 | 0.004013708 | 0.001094944 | 0.001664708 | -0.253041595 | -0.151150059 |                               |
| chr10 | 43476985  | 43477278  | 294  | * | 4  | 1.50236E-13 | 0.001733909 | 0.001095624 | 0.001005283 | 0.162336106  | 0.073999372  |                               |
| chr9  | 135035970 | 135036868 | 899  | * | 4  | 1.85148E-22 | 4.55363E-05 | 0.001096341 | 2.54286E-05 | -0.257268102 | -0.090105567 |                               |
| chr4  | 3404372   | 3404905   | 534  | * | 2  | 3.00084E-12 | 0.000334785 | 0.001097659 | 0.000379744 | 0.160769437  | 0.117034969  | RGS12                         |
| chr3  | 31252037  | 31252039  | 3    | * | 2  | 1.04961E-14 | 8.22817E-06 | 0.00110072  | 1.93313E-05 | -0.333094909 | -0.331143167 |                               |
| chr5  | 78279424  | 78279841  | 418  | * | 2  | 5.91454E-13 | 0.043561386 | 0.001101765 | 0.003850762 | -0.221934085 | -0.115720994 | ARSB                          |
| chr7  | 99953465  | 99956107  | 2643 | * | 10 | 8.55372E-32 | 2.96796E-05 | 0.001102326 | 1.40453E-07 | -0.359359623 | -0.107105717 | STAG3L5P-PVRIG2P-PILRB, PILRB |
| chr15 | 38963907  | 38963972  | 66   | * | 3  | 2.09804E-13 | 0.001023664 | 0.001102402 | 0.000744105 | -0.213537756 | -0.131244069 |                               |
| chr14 | 74296334  | 74297416  | 1083 | * | 5  | 2.8591E-22  | 0.00135081  | 0.001104441 | 5.24646E-05 | -0.24443311  | -0.089487266 | RP5-1021120.2                 |
| chr11 | 4469737   | 4470183   | 447  | * | 2  | 4.57845E-11 | 0.014134027 | 0.001104784 | 0.002827424 | -0.304608223 | -0.145046554 |                               |
| chr11 | 65291370  | 65291709  | 340  | * | 3  | 1.03802E-12 | 0.055710702 | 0.001104975 | 0.006052827 | 0.146761309  | 0.063916479  |                               |
| chr8  | 6758616   | 6758788   | 173  | * | 2  | 1.76002E-09 | 0.028695147 | 0.001105016 | 0.003502865 | -0.214488717 | -0.099314964 |                               |
| chr8  | 127832164 | 127832509 | 346  | * | 2  | 4.56235E-10 | 0.058386737 | 0.001105151 | 0.004078874 | -0.289090071 | -0.148345635 |                               |
| chr21 | 35967898  | 35968217  | 320  | * | 2  | 6.24914E-10 | 0.094170887 | 0.001105204 | 0.004364398 | -0.299909168 | -0.148872906 | RCAN1                         |
| chr2  | 100106981 | 100107672 | 692  | * | 3  | 4.74904E-18 | 0.000260417 | 0.001109154 | 4.48432E-05 | -0.281911974 | -0.185301534 |                               |
| chr19 | 34965973  | 34966155  | 183  | * | 2  | 2.20965E-09 | 0.151766958 | 0.001112028 | 0.004577167 | -0.29178442  | -0.147124492 |                               |
| chr10 | 104813866 | 104814269 | 404  | * | 2  | 4.6747E-11  | 0.006739196 | 0.001113216 | 0.002131793 | 0.208580271  | 0.13546173   | CNNM2                         |
| chr11 | 67251154  | 67251939  | 786  | * | 3  | 1.04013E-17 | 7.28166E-05 | 0.001113919 | 9.46897E-05 | 0.166131724  | 0.122848433  | AIP                           |
| chr21 | 36118936  | 36119409  | 474  | * | 2  | 7.63011E-14 | 0.021821071 | 0.00111587  | 0.003272006 | -0.168015854 | -0.080051145 | AP000330.8                    |
| chr10 | 114574152 | 114574959 | 808  | * | 3  | 3.0072E-18  | 1.20337E-07 | 0.001118089 | 5.85626E-07 | -0.259852538 | -0.176806839 | VTI1A                         |
| chr19 | 7538084   | 7538423   | 340  | * | 2  | 4.02414E-10 | 0.022960399 | 0.001121609 | 0.003333526 | -0.2302003   | -0.107301761 |                               |

|       |           |           |      |   |   |             |             |             |             |              |              |                               |
|-------|-----------|-----------|------|---|---|-------------|-------------|-------------|-------------|--------------|--------------|-------------------------------|
| chr17 | 64536954  | 64537735  | 782  | * | 2 | 1.17166E-11 | 7.95668E-06 | 0.001122626 | 1.88156E-05 | 0.168034324  | 0.149909292  | PRKCA                         |
| chr5  | 176980153 | 176980309 | 157  | * | 2 | 1.2038E-10  | 0.018993109 | 0.00112279  | 0.003152059 | -0.313826543 | -0.146272795 | FAM193B                       |
| chr9  | 112951179 | 112951406 | 228  | * | 2 | 1.45799E-09 | 0.043260728 | 0.001123006 | 0.003904263 | -0.161437194 | -0.073925783 |                               |
| chr15 | 76604101  | 76604817  | 717  | * | 4 | 8.4249E-18  | 0.774558191 | 0.001123821 | 0.030691648 | 0.11497126   | 0.037932744  |                               |
| chr6  | 151246387 | 151246895 | 509  | * | 2 | 3.11974E-14 | 9.52313E-06 | 0.001123881 | 2.20834E-05 | -0.261025443 | -0.242182398 | MTHFD1L                       |
| chr2  | 74708388  | 74709216  | 829  | * | 4 | 8.99243E-19 | 0.000617981 | 0.00112434  | 0.000437263 | -0.305035748 | -0.077337488 | CCDC142                       |
| chr18 | 13375087  | 13376599  | 1513 | * | 5 | 1.21079E-15 | 0.000221433 | 0.001124873 | 2.10144E-05 | 0.195813855  | 0.094350022  | LDLRAD4                       |
| chr1  | 43402591  | 43402937  | 347  | * | 2 | 5.31768E-10 | 0.179316389 | 0.00112541  | 0.004669929 | -0.159455038 | -0.080328452 | SLC2A1                        |
| chr8  | 21859910  | 21860740  | 831  | * | 3 | 9.67467E-19 | 0.037799068 | 0.001125823 | 0.000131426 | -0.322076681 | -0.184572823 | XPO7                          |
| chr14 | 55035889  | 55036043  | 155  | * | 2 | 2.00026E-14 | 0.000119862 | 0.00112595  | 0.000180998 | 0.19437411   | 0.124386434  | SAMD4A                        |
| chr20 | 50112307  | 50113484  | 1178 | * | 5 | 6.75244E-24 | 0.000515106 | 0.001128026 | 4.33677E-05 | -0.294381449 | -0.097682748 | NFATC2                        |
| chr4  | 6635119   | 6635485   | 367  | * | 2 | 1.51993E-14 | 8.43712E-06 | 0.001129633 | 1.98445E-05 | -0.219707269 | -0.183783654 |                               |
| chr12 | 117477387 | 117478480 | 1094 | * | 5 | 2.08954E-24 | 0.005226805 | 0.001129972 | 0.000104555 | -0.19515634  | -0.093160236 | TESC                          |
| chr6  | 113787498 | 113787865 | 368  | * | 2 | 3.75509E-10 | 0.077409493 | 0.001130656 | 0.0043404   | -0.302304651 | -0.152636109 |                               |
| chr15 | 52201998  | 52202509  | 512  | * | 2 | 3.80659E-12 | 0.000446126 | 0.001131384 | 0.000468252 | -0.208659676 | -0.078781421 | TMOD3                         |
| chr14 | 23284518  | 23285302  | 785  | * | 4 | 9.95767E-16 | 0.001974006 | 0.001131591 | 0.000780015 | -0.313140442 | -0.11467594  | SLC7A7                        |
| chr15 | 101738274 | 101738616 | 343  | * | 4 | 1.10758E-11 | 0.136050295 | 0.00113192  | 0.013031334 | 0.177441326  | 0.066368027  | CHSY1                         |
| chr3  | 139393960 | 139394779 | 820  | * | 2 | 2.22248E-13 | 1.62055E-05 | 0.001131973 | 3.52417E-05 | 0.20749217   | 0.145135059  | NMNAT3                        |
| chr6  | 41840102  | 41840188  | 87   | * | 2 | 3.87006E-10 | 0.007730508 | 0.001133446 | 0.002286281 | -0.325384333 | -0.170811158 | USP49                         |
| chr1  | 236118040 | 236118450 | 411  | * | 3 | 5.03425E-15 | 4.14314E-05 | 0.001133537 | 7.90537E-05 | -0.393247694 | -0.182598765 |                               |
| chr19 | 1423273   | 1423967   | 695  | * | 4 | 3.05034E-15 | 0.005194753 | 0.001134597 | 0.000878522 | -0.305423273 | -0.092275576 | DAZAP1                        |
| chr2  | 169402526 | 169402543 | 18   | * | 2 | 2.14397E-13 | 3.47628E-05 | 0.001134686 | 6.74401E-05 | -0.144829109 | -0.139193583 | CERS6                         |
| chr6  | 138030371 | 138030763 | 393  | * | 2 | 1.07055E-10 | 0.004403228 | 0.001136561 | 0.001780693 | -0.32697571  | -0.173293716 |                               |
| chr18 | 456806    | 457306    | 501  | * | 3 | 3.97508E-14 | 0.000144779 | 0.00113739  | 0.000188998 | -0.223841755 | -0.130564597 | COLEC12                       |
| chr10 | 99095883  | 99095890  | 8    | * | 2 | 2.89773E-15 | 9.70941E-06 | 0.00114332  | 2.25258E-05 | -0.234738292 | -0.207385102 | RP11-452K12.4                 |
| chr14 | 55840839  | 55841074  | 236  | * | 2 | 1.57354E-09 | 0.051794838 | 0.001144195 | 0.00410683  | 0.185815076  | 0.100981582  | ATG14                         |
| chr5  | 131999237 | 132000721 | 1485 | * | 5 | 1.67503E-20 | 0.000407573 | 0.001145082 | 6.5466E-05  | 0.151436834  | 0.060395481  | AC004041.2                    |
| chr8  | 22852120  | 22853394  | 1275 | * | 6 | 2.05669E-26 | 0.045282245 | 0.001145285 | 0.000437201 | -0.290431956 | -0.079029069 | RHOBTB2, PEBP4, RP11-875O11.1 |
| chr19 | 1177518   | 1177575   | 58   | * | 2 | 1.22477E-13 | 1.97635E-05 | 0.001145912 | 4.19207E-05 | -0.219990799 | -0.194062063 |                               |

|       |           |           |      |   |   |             |             |             |             |              |              |                         |
|-------|-----------|-----------|------|---|---|-------------|-------------|-------------|-------------|--------------|--------------|-------------------------|
| chr9  | 33446442  | 33447032  | 591  | * | 2 | 8.04124E-14 | 0.010157288 | 0.001146517 | 0.002571154 | -0.183758335 | -0.112758794 | AQP3                    |
| chr11 | 34202237  | 34202256  | 20   | * | 2 | 3.59171E-09 | 0.029869011 | 0.001146531 | 0.003641079 | -0.262733175 | -0.138881889 | ABTB2                   |
| chr8  | 102507382 | 102507837 | 456  | * | 3 | 2.05059E-13 | 0.003756901 | 0.001147844 | 0.001040856 | -0.211622137 | -0.101513796 | GRHL2                   |
| chr14 | 93116574  | 93117002  | 429  | * | 2 | 2.72143E-13 | 4.38066E-05 | 0.001148515 | 8.18875E-05 | -0.180291287 | -0.146516768 | RIN3                    |
| chr19 | 19702165  | 19702508  | 344  | * | 2 | 3.48833E-10 | 0.011796395 | 0.001149308 | 0.002725425 | -0.144976127 | -0.063631702 | PBX4                    |
| chr2  | 113345365 | 113346635 | 1271 | * | 4 | 1.09452E-16 | 4.59945E-05 | 0.001149372 | 3.53621E-05 | -0.304741291 | -0.147755261 | CHCHD5, AC012442.5      |
| chr2  | 218785909 | 218786102 | 194  | * | 2 | 8.25331E-14 | 7.27213E-05 | 0.001150911 | 0.000123416 | 0.154370898  | 0.152111765  | TNS1                    |
| chr21 | 37535372  | 37536685  | 1314 | * | 6 | 1.3863E-28  | 2.34047E-05 | 0.001151174 | 2.34287E-06 | -0.241890012 | -0.113498327 | DOPEY2                  |
| chr10 | 35703143  | 35703322  | 180  | * | 3 | 2.63402E-10 | 0.310628159 | 0.001151603 | 0.010570071 | -0.34594245  | -0.12088849  | CCNY                    |
| chr19 | 7525528   | 7525578   | 51   | * | 2 | 5.36591E-10 | 0.00881596  | 0.001152867 | 0.002440367 | -0.108764565 | -0.059224534 | CTD-2207O23.3, ARHGEF18 |
| chr14 | 105899248 | 105899515 | 268  | * | 4 | 4.85428E-14 | 0.001312343 | 0.001153944 | 0.000588326 | -0.159387548 | -0.037422198 | TEX22, MTA1             |
| chr22 | 27067406  | 27067721  | 316  | * | 3 | 2.93855E-17 | 0.000288939 | 0.001158058 | 4.89606E-05 | -0.219649126 | -0.110083023 | MIAT, CTA-373H7.7       |
| chr22 | 24938255  | 24938711  | 457  | * | 2 | 4.60338E-14 | 1.36638E-05 | 0.001159887 | 3.05096E-05 | -0.273805493 | -0.187817159 | GUCD1                   |
| chr9  | 124009589 | 124009784 | 196  | * | 3 | 5.66921E-21 | 7.12733E-08 | 0.001159979 | 3.78089E-07 | -0.337521591 | -0.296816522 | GSN                     |
| chr19 | 51626812  | 51627334  | 523  | * | 4 | 1.17871E-19 | 7.1693E-06  | 0.001160135 | 9.87326E-06 | -0.225692168 | -0.110054817 |                         |
| chr6  | 42984291  | 42984695  | 405  | * | 4 | 1.53946E-11 | 0.378795684 | 0.001161268 | 0.022296798 | 0.166990947  | 0.047640545  | KLHDC3                  |
| chr22 | 18112640  | 18112710  | 71   | * | 2 | 9.8477E-13  | 0.071124893 | 0.001161484 | 0.004384863 | -0.28854825  | -0.142033184 | BCL2L13                 |
| chr3  | 15519117  | 15519578  | 462  | * | 3 | 8.391E-17   | 1.16016E-05 | 0.00116183  | 2.24572E-05 | -0.282599108 | -0.202202649 | COLQ                    |
| chr14 | 75736090  | 75736811  | 722  | * | 3 | 1.16546E-14 | 4.95639E-05 | 0.001163805 | 8.3741E-05  | -0.246840921 | -0.095831449 | RP11-293M10.2           |
| chr2  | 127822551 | 127822822 | 272  | * | 4 | 1.04338E-16 | 9.66489E-05 | 0.001163968 | 0.00011432  | -0.07041012  | -0.041975709 | BIN1                    |
| chr14 | 31859505  | 31859515  | 11   | * | 2 | 8.1581E-15  | 8.53774E-06 | 0.001166121 | 2.01494E-05 | 0.185238992  | 0.157883831  | HEATR5A, RP11-176H8.1   |
| chr19 | 928287    | 929119    | 833  | * | 3 | 4.07908E-13 | 0.002547671 | 0.001166786 | 0.000399869 | -0.218694397 | -0.12311136  | ARID3A, AC005391.2      |
| chr17 | 76850052  | 76850277  | 226  | * | 6 | 2.85297E-33 | 1.50141E-08 | 0.00116685  | 4.06502E-09 | -0.274251823 | -0.152773775 | TIMP2                   |
| chr4  | 184916766 | 184917058 | 293  | * | 2 | 2.66933E-10 | 0.031113182 | 0.001166904 | 0.003729372 | -0.246824199 | -0.126228664 | STOX2                   |
| chr19 | 4901791   | 4902899   | 1109 | * | 7 | 1.64066E-23 | 9.51182E-06 | 0.001167216 | 2.10481E-06 | -0.308013601 | -0.124292894 | ARRDC5                  |
| chr22 | 30714890  | 30714999  | 110  | * | 2 | 9.98988E-14 | 1.81778E-05 | 0.001168841 | 3.91565E-05 | -0.169525121 | -0.15564423  | TBC1D10A                |
| chr8  | 59185164  | 59185425  | 262  | * | 2 | 7.9455E-10  | 0.010899696 | 0.001169369 | 0.002677747 | -0.20493539  | -0.113192512 |                         |
| chr9  | 75200681  | 75200832  | 152  | * | 2 | 3.05054E-09 | 0.038944027 | 0.001169851 | 0.003942137 | -0.279423301 | -0.152970269 | TMC1                    |
| chr17 | 80696071  | 80696228  | 158  | * | 2 | 4.76767E-10 | 0.007811482 | 0.001170087 | 0.002345165 | 0.176101773  | 0.096613736  | FN3K                    |

|       |           |           |      |   |   |             |             |             |             |              |              |                                     |
|-------|-----------|-----------|------|---|---|-------------|-------------|-------------|-------------|--------------|--------------|-------------------------------------|
| chr3  | 177159641 | 177159881 | 241  | * | 4 | 7.08373E-16 | 0.003114738 | 0.00117091  | 0.000227375 | -0.187627436 | -0.002011583 | LINC00578                           |
| chr3  | 136440459 | 136440469 | 11   | * | 2 | 3.02224E-11 | 0.000878023 | 0.001172016 | 0.000740015 | -0.067802327 | -0.063468543 | STAG1                               |
| chr21 | 35899585  | 35900624  | 1040 | * | 4 | 2.3686E-16  | 0.000370425 | 0.001175053 | 0.000246614 | -0.356386374 | -0.114290508 | RCAN1                               |
| chr8  | 9472057   | 9472784   | 728  | * | 3 | 3.39846E-17 | 4.8112E-07  | 0.001181949 | 1.95692E-06 | -0.248029574 | -0.173247358 | TNKS                                |
| chr16 | 11306333  | 11306502  | 170  | * | 2 | 8.53398E-10 | 0.004984883 | 0.001181995 | 0.001934551 | -0.297262917 | -0.157660389 | RP11-396B14.2                       |
| chr3  | 50658081  | 50658472  | 392  | * | 2 | 4.53429E-10 | 0.094959496 | 0.001183266 | 0.004627116 | -0.153206967 | -0.077309961 | MAPKAPK3                            |
| chr20 | 59928451  | 59928453  | 3    | * | 2 | 1.93892E-10 | 0.001801322 | 0.001183643 | 0.001142525 | -0.229081189 | -0.156231571 | CDH4                                |
| chr11 | 113958057 | 113958706 | 650  | * | 3 | 6.60138E-14 | 0.000213799 | 0.001184347 | 8.06845E-05 | -0.209766482 | -0.088297967 | ZBTB16                              |
| chr2  | 29149895  | 29150512  | 618  | * | 4 | 4.76665E-19 | 3.4511E-06  | 0.001186789 | 2.90011E-06 | -0.225001313 | -0.163479293 | WDR43, SNORD53, Y_RNA               |
| chr7  | 75505977  | 75505981  | 5    | * | 2 | 1.02172E-14 | 8.6329E-06  | 0.00118692  | 2.04022E-05 | -0.337118106 | -0.319850179 | RHBDD2                              |
| chr5  | 33997223  | 33997484  | 262  | * | 3 | 2.10671E-12 | 0.043282313 | 0.001187599 | 0.000928967 | -0.26448258  | -0.136453412 | AMACR, RP11-1084J3.4, RP11-1084J3.3 |
| chr19 | 840737    | 841082    | 346  | * | 7 | 8.31842E-44 | 3.8925E-14  | 0.001188991 | 2.75084E-12 | -0.214244732 | -0.154386568 | PRTN3                               |
| chr1  | 184580432 | 184580661 | 230  | * | 2 | 1.53473E-09 | 0.210078179 | 0.00118997  | 0.004937723 | 0.217314639  | 0.109958198  | C1orf21                             |
| chr16 | 646175    | 646579    | 405  | * | 3 | 3.17686E-13 | 0.00072246  | 0.001190415 | 0.000466208 | -0.185370406 | -0.128192125 | RAB40C                              |
| chr2  | 40740063  | 40740436  | 374  | * | 2 | 4.55405E-13 | 0.147883239 | 0.001192996 | 0.004854383 | -0.229193855 | -0.113572613 | SLC8A1                              |
| chr1  | 111770111 | 111770718 | 608  | * | 4 | 2.9014E-14  | 0.127483935 | 0.001194202 | 0.005078577 | -0.248461467 | -0.081691146 | CHI3L2                              |
| chr7  | 1082103   | 1082392   | 290  | * | 2 | 2.40884E-15 | 0.00082865  | 0.001195112 | 0.000720139 | 0.174659957  | 0.125899214  | AC073957.15, C7orf50                |
| chr4  | 40814531  | 40814675  | 145  | * | 3 | 1.03765E-18 | 6.32649E-07 | 0.001195492 | 2.25458E-06 | -0.249290291 | -0.203815142 | APBB2                               |
| chr20 | 47393755  | 47393961  | 207  | * | 2 | 2.00817E-11 | 0.001604208 | 0.001196304 | 0.001075288 | -0.186028887 | -0.117185534 | PREX1                               |
| chr12 | 120692709 | 120692870 | 162  | * | 2 | 2.29043E-12 | 0.000211461 | 0.001198557 | 0.000282869 | 0.171692757  | 0.131931801  | PXN                                 |
| chr1  | 32782332  | 32782341  | 10   | * | 2 | 2.3978E-11  | 0.000203712 | 0.001198698 | 0.00027523  | 0.129028538  | 0.121079132  | HDAC1                               |
| chr7  | 1220356   | 1221192   | 837  | * | 4 | 1.35968E-15 | 0.069714982 | 0.001198721 | 0.001675575 | -0.235113395 | -0.099421403 |                                     |
| chr16 | 67361154  | 67361968  | 815  | * | 4 | 1.5264E-16  | 0.017127201 | 0.001198907 | 0.003145375 | 0.191621236  | 0.079297789  | LRRC36                              |
| chr12 | 18963829  | 18964297  | 469  | * | 4 | 9.45901E-19 | 0.000839439 | 0.001200929 | 8.87632E-05 | -0.266693312 | -0.103090059 |                                     |
| chr7  | 127231392 | 127231698 | 307  | * | 2 | 3.14794E-10 | 0.125190638 | 0.001201641 | 0.004821106 | -0.184940182 | -0.092919362 | ARF5, FSCN3, GCC1                   |
| chr14 | 70263811  | 70265306  | 1496 | * | 7 | 5.34395E-25 | 9.83094E-06 | 0.001202325 | 1.47015E-06 | -0.278481624 | -0.109710226 | SLC10A1                             |
| chr20 | 31669279  | 31669392  | 114  | * | 2 | 6.1038E-10  | 0.057965772 | 0.001203436 | 0.004366694 | -0.255350622 | -0.13050389  | BPIFB4                              |
| chr2  | 242174625 | 242175569 | 945  | * | 4 | 1.07423E-19 | 0.000186471 | 0.001205142 | 6.46762E-05 | -0.276589203 | -0.106857082 | HDLBP                               |
| chr5  | 135394043 | 135394767 | 725  | * | 5 | 1.52895E-21 | 4.34685E-05 | 0.001205923 | 1.69106E-05 | -0.204321828 | -0.093920717 | TGFBI                               |

|       |           |           |      |   |    |             |             |             |             |              |              |                     |
|-------|-----------|-----------|------|---|----|-------------|-------------|-------------|-------------|--------------|--------------|---------------------|
| chr21 | 45772566  | 45774664  | 2099 | * | 11 | 5.98452E-51 | 1.37733E-11 | 0.001206264 | 1.63351E-12 | -0.378648016 | -0.12016222  | TRPM2               |
| chr22 | 37667522  | 37667917  | 396  | * | 2  | 4.37884E-10 | 0.039044986 | 0.001207341 | 0.004043607 | -0.120566551 | -0.062417541 |                     |
| chr19 | 2137773   | 2137818   | 46   | * | 3  | 1.85782E-11 | 0.043080311 | 0.001208166 | 0.006393807 | -0.130898521 | -0.049479381 | AP3D1               |
| chr14 | 35855812  | 35856002  | 191  | * | 2  | 2.03397E-10 | 0.024369522 | 0.001208341 | 0.003586162 | 0.19390839   | 0.10043481   |                     |
| chr17 | 7017474   | 7019284   | 1811 | * | 9  | 1.25156E-28 | 0.029232635 | 0.001209009 | 0.000283357 | -0.195215535 | -0.045766568 | ASGR2               |
| chr2  | 232458914 | 232459434 | 521  | * | 2  | 3.76696E-11 | 0.002710651 | 0.001210506 | 0.001447564 | 0.173012428  | 0.076561926  | C2orf57             |
| chr14 | 89951037  | 89951777  | 741  | * | 2  | 3.47511E-12 | 9.26066E-06 | 0.001211312 | 2.17862E-05 | -0.243652109 | -0.240107751 | FOXN3, RP11-33N16.3 |
| chr2  | 242941132 | 242941490 | 359  | * | 2  | 6.45216E-11 | 0.001238095 | 0.001211807 | 0.000929096 | 0.157315904  | 0.068851809  | AC131097.3          |
| chr19 | 40006192  | 40006625  | 434  | * | 4  | 2.38914E-17 | 0.032190052 | 0.001212115 | 0.002879155 | 0.065349902  | 0.018809222  | SELV                |
| chr6  | 144018187 | 144018564 | 378  | * | 2  | 4.59817E-12 | 0.000179109 | 0.001213541 | 0.000251301 | -0.292833734 | -0.231453892 | PHACTR2             |
| chr18 | 72706612  | 72707209  | 598  | * | 2  | 6.39267E-14 | 7.03129E-05 | 0.001213696 | 0.000121945 | 0.181725594  | 0.125392166  | ZNF407              |
| chr15 | 52393162  | 52393233  | 72   | * | 2  | 5.13336E-10 | 0.009061179 | 0.001214136 | 0.002554981 | -0.127235515 | -0.039823345 |                     |
| chr4  | 141047768 | 141048293 | 526  | * | 3  | 8.60294E-18 | 0.00090274  | 0.00121555  | 0.000115464 | 0.136687769  | 0.086496645  | MAML3               |
| chr15 | 92934441  | 92934809  | 369  | * | 2  | 3.96355E-10 | 0.024493311 | 0.001215689 | 0.003607763 | -0.238499406 | -0.1221903   |                     |
| chr20 | 47887009  | 47887476  | 468  | * | 3  | 2.91829E-11 | 0.033533284 | 0.001216053 | 0.005846534 | -0.240771707 | -0.079922803 | ZNFX1               |
| chr7  | 139251131 | 139251615 | 485  | * | 3  | 7.78244E-11 | 0.056932023 | 0.001216658 | 0.007364976 | 0.161948276  | 0.044771179  | HIPK2               |
| chr17 | 75399899  | 75400156  | 258  | * | 2  | 4.53195E-10 | 0.039178532 | 0.001217058 | 0.004072324 | -0.197510382 | -0.092454588 | SEPT9               |
| chr16 | 3017495   | 3017955   | 461  | * | 4  | 3.60526E-14 | 0.036325866 | 0.001217168 | 0.007469435 | 0.097001171  | 0.022109099  | KREMEN2             |
| chr3  | 195171693 | 195171852 | 160  | * | 2  | 2.97823E-12 | 7.75317E-05 | 0.001217641 | 0.000131954 | -0.259313183 | -0.241103774 |                     |
| chr11 | 107993298 | 107993467 | 170  | * | 2  | 8.53687E-14 | 0.260498143 | 0.001218686 | 0.005078036 | -0.191630495 | -0.095252841 | ACAT1               |
| chr19 | 56148037  | 56148120  | 84   | * | 3  | 3.08916E-13 | 0.000465477 | 0.001220945 | 0.000404715 | 0.1599693    | 0.080078455  | ZNF580, ZNF581      |
| chr10 | 71097327  | 71097735  | 409  | * | 6  | 1.53335E-26 | 1.35072E-07 | 0.001223661 | 2.287E-07   | -0.381870532 | -0.165974425 | HK1                 |
| chr19 | 42259081  | 42259395  | 315  | * | 4  | 9.21609E-20 | 4.82487E-05 | 0.001223836 | 1.08124E-05 | -0.296214311 | -0.15522395  | CEA, CEACAM6        |
| chr16 | 57157313  | 57157904  | 592  | * | 3  | 5.24967E-20 | 1.76843E-07 | 0.001223867 | 8.5228E-07  | -0.175327768 | -0.069428271 | CPNE2               |
| chr6  | 13414079  | 13414265  | 187  | * | 2  | 1.10583E-09 | 0.020688518 | 0.001228776 | 0.003459087 | 0.197176364  | 0.095242619  | GFOD1               |
| chr19 | 3398778   | 3399015   | 238  | * | 3  | 6.70461E-17 | 3.29372E-05 | 0.00122899  | 2.67903E-05 | -0.241912653 | -0.165977454 | NFIC                |
| chr19 | 42613359  | 42613682  | 324  | * | 2  | 5.01659E-10 | 0.00745313  | 0.001230942 | 0.002377062 | 0.189965243  | 0.114810927  | POU2F2              |
| chr3  | 193964618 | 193965305 | 688  | * | 6  | 1.38795E-23 | 0.001670626 | 0.001231706 | 5.16647E-05 | -0.382395498 | -0.13218284  | RP11-513G11.4       |
| chr14 | 23912889  | 23913135  | 247  | * | 2  | 7.65378E-11 | 0.011641147 | 0.001232543 | 0.002846881 | 0.176893177  | 0.098204678  |                     |

|       |           |           |      |   |   |             |             |             |             |              |              |                               |
|-------|-----------|-----------|------|---|---|-------------|-------------|-------------|-------------|--------------|--------------|-------------------------------|
| chr1  | 9444934   | 9445612   | 679  | * | 3 | 1.90849E-17 | 6.98701E-05 | 0.001233518 | 3.49315E-05 | 0.179344885  | 0.127983033  |                               |
| chr3  | 184880078 | 184880944 | 867  | * | 7 | 2.45506E-14 | 0.07118859  | 0.001234046 | 0.015991425 | -0.14105987  | -0.028772462 | EHHADH-AS1                    |
| chr4  | 38859587  | 38859770  | 184  | * | 4 | 2.27374E-23 | 9.91122E-08 | 0.001234722 | 2.86284E-07 | -0.328709954 | -0.211044798 |                               |
| chr20 | 1146798   | 1146889   | 92   | * | 3 | 1.96163E-12 | 0.001913304 | 0.00123571  | 0.001182417 | -0.234186947 | -0.111253509 | PSMF1                         |
| chr2  | 220384302 | 220384841 | 540  | * | 2 | 3.62971E-12 | 0.000391074 | 0.001236639 | 0.00044398  | 0.192547209  | 0.156489644  | ASIC4                         |
| chr16 | 17448296  | 17448516  | 221  | * | 3 | 3.31997E-13 | 0.002922023 | 0.001237178 | 0.00036897  | -0.294968064 | -0.160820839 | XYLT1                         |
| chr3  | 119498870 | 119500686 | 1817 | * | 5 | 3.49371E-22 | 8.69365E-08 | 0.00123848  | 3.57281E-07 | -0.320614348 | -0.161848549 | NR112                         |
| chr1  | 38947929  | 38948122  | 194  | * | 2 | 2.50642E-11 | 0.000252287 | 0.001239542 | 0.000325681 | -0.165582018 | -0.116827787 |                               |
| chr5  | 14405920  | 14407367  | 1448 | * | 9 | 1.16722E-26 | 0.002835376 | 0.00123987  | 7.98309E-06 | 0.18789515   | 0.068650581  | TRIO                          |
| chr9  | 123346214 | 123346320 | 107  | * | 2 | 6.48628E-09 | 0.102660495 | 0.001242478 | 0.004864126 | 0.244394534  | 0.125690728  |                               |
| chr22 | 38301066  | 38301577  | 512  | * | 3 | 5.31446E-13 | 0.072458141 | 0.001244834 | 0.008431286 | -0.197430047 | -0.045370456 |                               |
| chr18 | 11994896  | 11994976  | 81   | * | 2 | 2.77411E-10 | 0.00270338  | 0.001245049 | 0.001468806 | -0.212331062 | -0.129431979 | IMPA2, RP11-820I16.3          |
| chr15 | 52405464  | 52405647  | 184  | * | 2 | 5.59235E-12 | 0.000765879 | 0.001245108 | 0.000698025 | -0.122345124 | -0.072174274 |                               |
| chr5  | 53816023  | 53816563  | 541  | * | 2 | 1.32475E-11 | 0.002680328 | 0.001245466 | 0.001462389 | -0.123012424 | -0.105959859 | SNX18                         |
| chr17 | 3602004   | 3602036   | 33   | * | 2 | 1.89747E-14 | 1.00699E-05 | 0.001246168 | 2.3574E-05  | -0.257667955 | -0.225326881 |                               |
| chr20 | 24968599  | 24969842  | 1244 | * | 3 | 1.61232E-11 | 1.06555E-05 | 0.001246497 | 1.45905E-05 | -0.306749066 | -0.158631973 | APMAP                         |
| chr7  | 130372167 | 130372419 | 253  | * | 2 | 3.14307E-10 | 0.003807104 | 0.001246776 | 0.00175431  | -0.234016405 | -0.15217679  | TSGA13                        |
| chr9  | 37936386  | 37937279  | 894  | * | 3 | 1.76097E-14 | 4.06639E-05 | 0.001249632 | 7.32815E-05 | 0.191038127  | 0.136842683  | RP11-613M10.9, SHB, RNU7-124P |
| chr16 | 89519917  | 89520128  | 212  | * | 2 | 1.00902E-12 | 9.98294E-05 | 0.00125033  | 0.000162326 | -0.222124778 | -0.181844559 | ANKRD11                       |
| chr7  | 139432152 | 139432178 | 27   | * | 2 | 3.44976E-14 | 2.33842E-05 | 0.001251113 | 4.92744E-05 | -0.18389469  | -0.175316675 | HIPK2                         |
| chr17 | 57502922  | 57503086  | 165  | * | 2 | 3.72153E-11 | 0.000738615 | 0.001251736 | 0.000683562 | 0.210864156  | 0.143641992  |                               |
| chr4  | 42645776  | 42646654  | 879  | * | 3 | 3.30171E-13 | 5.87286E-05 | 0.001251804 | 4.96204E-05 | 0.099503855  | 0.087095478  | ATP8A1                        |
| chr14 | 23015657  | 23016326  | 670  | * | 5 | 3.95164E-24 | 6.53312E-05 | 0.001251963 | 2.93361E-06 | 0.224884903  | 0.111158005  |                               |
| chr2  | 223313524 | 223313861 | 338  | * | 2 | 6.12206E-11 | 0.005720843 | 0.001251966 | 0.002137497 | -0.134643596 | -0.091959083 | SGPP2                         |
| chr22 | 23592850  | 23593559  | 710  | * | 3 | 3.84491E-13 | 0.005162965 | 0.001252369 | 0.001267725 | -0.346292031 | -0.147351413 | BCR                           |
| chr14 | 69395234  | 69395636  | 403  | * | 2 | 2.89415E-11 | 0.002008296 | 0.001252404 | 0.001252366 | -0.079718651 | -0.053502756 | ACTN1                         |
| chr10 | 30780298  | 30780854  | 557  | * | 2 | 1.01906E-11 | 0.000495809 | 0.001253092 | 0.000525271 | -0.23271801  | -0.160243437 |                               |
| chr3  | 140997743 | 140998267 | 525  | * | 3 | 1.09333E-13 | 0.001591026 | 0.001253694 | 0.000578602 | -0.205969587 | -0.09384967  | ACPL2, RP11-438D8.2           |
| chr1  | 31956270  | 31956405  | 136  | * | 3 | 1.21911E-17 | 1.89198E-06 | 0.00125395  | 5.0533E-06  | -0.263786346 | -0.145682041 |                               |

|       |           |           |      |   |    |             |             |             |             |              |              |                                      |
|-------|-----------|-----------|------|---|----|-------------|-------------|-------------|-------------|--------------|--------------|--------------------------------------|
| chr1  | 36004549  | 36004559  | 11   | * | 2  | 2.12099E-14 | 1.12648E-05 | 0.001254821 | 2.60717E-05 | 0.128497683  | 0.121517825  | KIAA0319L                            |
| chr1  | 15348161  | 15348264  | 104  | * | 2  | 2.82744E-09 | 0.070691561 | 0.001255598 | 0.004671643 | 0.127645451  | 0.066125762  | KAZN                                 |
| chr9  | 7961014   | 7961264   | 251  | * | 2  | 5.9315E-11  | 0.001163337 | 0.001255835 | 0.000910792 | -0.360081329 | -0.201142712 | RP11-29B9.2                          |
| chr13 | 108975215 | 108975920 | 706  | * | 2  | 1.74373E-12 | 3.29399E-05 | 0.001256267 | 6.59734E-05 | -0.264807281 | -0.246728284 |                                      |
| chr22 | 47021746  | 47022654  | 909  | * | 8  | 4.22287E-17 | 0.410144714 | 0.00125656  | 0.044145978 | -0.315736864 | -0.037121873 | GRAMD4                               |
| chr19 | 707610    | 708469    | 860  | * | 3  | 4.70578E-14 | 0.059507621 | 0.001256666 | 0.007329161 | -0.184462054 | -0.077824272 |                                      |
| chr1  | 17614144  | 17614280  | 137  | * | 2  | 6.06452E-14 | 1.43329E-05 | 0.001257837 | 3.22576E-05 | -0.294752692 | -0.240466595 |                                      |
| chr16 | 57700944  | 57702239  | 1296 | * | 9  | 3.26233E-51 | 1.69807E-14 | 0.001258969 | 1.23489E-13 | -0.282417474 | -0.176208409 | GPR97                                |
| chr15 | 39627235  | 39627548  | 314  | * | 2  | 3.96827E-15 | 9.78268E-06 | 0.001259444 | 2.30099E-05 | -0.225901609 | -0.217722407 | RP11-624L4.1                         |
| chr2  | 27850964  | 27852421  | 1458 | * | 15 | 1.12966E-36 | 0.018305597 | 0.001259531 | 0.00551983  | -0.212894074 | -0.032226738 | ZNF512, RP11-158I13.2, GPN1, CCDC121 |
| chr2  | 65088881  | 65092221  | 3341 | * | 7  | 3.54993E-20 | 3.26254E-09 | 0.001260412 | 7.63071E-09 | -0.267780874 | -0.136879194 | AC007880.1                           |
| chr7  | 45128053  | 45128199  | 147  | * | 2  | 9.14937E-12 | 0.021784005 | 0.001260478 | 0.0035808   | 0.150803185  | 0.070829251  | NACAD                                |
| chr2  | 38827187  | 38827464  | 278  | * | 2  | 2.85454E-10 | 0.003880061 | 0.001260806 | 0.001782873 | -0.225534179 | -0.094882904 | HNRNPLL                              |
| chr22 | 45123972  | 45125218  | 1247 | * | 4  | 7.35223E-17 | 0.023073589 | 0.001261009 | 0.006120773 | -0.155417904 | -0.06622513  | PRR5, PRR5-ARHGAP8, ARHGAP8          |
| chr12 | 58011837  | 58012601  | 765  | * | 4  | 7.12171E-16 | 0.010017192 | 0.001261588 | 0.001298434 | 0.164202419  | 0.085628846  | ARHGEF25, AC025165.8                 |
| chr1  | 174756086 | 174756146 | 61   | * | 2  | 8.17012E-11 | 0.000367427 | 0.001261884 | 0.00042858  | 0.129440702  | 0.086186543  | RABGAP1L                             |
| chr9  | 139926494 | 139927646 | 1153 | * | 5  | 6.74119E-24 | 4.98449E-09 | 0.001264046 | 4.87558E-08 | -0.235615361 | -0.142701736 | C9orf139, FUT7                       |
| chr16 | 88547533  | 88547861  | 329  | * | 4  | 4.89562E-18 | 0.000387816 | 0.001264186 | 5.39092E-05 | 0.187960652  | 0.091802175  | ZFPM1                                |
| chr17 | 47464627  | 47465656  | 1030 | * | 4  | 9.50424E-20 | 1.37307E-06 | 0.001265169 | 2.95301E-06 | 0.19810636   | 0.154393436  | RP11-81K2.1                          |
| chr11 | 36475297  | 36475492  | 196  | * | 2  | 1.28904E-12 | 0.001362351 | 0.001265262 | 0.001005598 | -0.104365851 | -0.024477575 | PRR5L                                |
| chr8  | 37378276  | 37379119  | 844  | * | 5  | 8.35827E-20 | 0.00016399  | 0.001268236 | 2.43042E-05 | -0.292900494 | -0.045264962 | RP11-150O12.1                        |
| chr16 | 11299313  | 11299766  | 454  | * | 2  | 1.19575E-10 | 0.003952888 | 0.001268262 | 0.001805809 | -0.20077152  | -0.125856513 | RP11-396B14.2                        |
| chr4  | 680656    | 681509    | 854  | * | 6  | 6.78184E-23 | 0.001465597 | 0.001268845 | 0.000105802 | -0.257564839 | -0.080441768 | MFSD7                                |
| chr6  | 36857023  | 36857605  | 583  | * | 2  | 3.25981E-13 | 2.04297E-05 | 0.001268881 | 4.39888E-05 | -0.20728592  | -0.009818683 | C6orf89                              |
| chr11 | 104905889 | 104906152 | 264  | * | 2  | 6.1254E-10  | 0.040505977 | 0.001270001 | 0.004242797 | -0.248555766 | -0.12590317  | CASP1                                |
| chr19 | 42946985  | 42947497  | 513  | * | 5  | 9.45693E-17 | 0.017781694 | 0.001270022 | 0.000759201 | -0.176476929 | -0.068940011 | LIPE-AS1, CXCL17                     |
| chr15 | 83419719  | 83420281  | 563  | * | 2  | 8.12419E-14 | 0.036592617 | 0.001273238 | 0.004152377 | -0.320306412 | -0.162395766 | RP11-752G15.6                        |
| chr22 | 18386258  | 18386798  | 541  | * | 3  | 1.39902E-10 | 0.0586688   | 0.001274697 | 0.006645847 | 0.157518815  | 0.058789919  | MICAL3                               |
| chr6  | 11778902  | 11779078  | 177  | * | 3  | 2.80891E-11 | 0.079617846 | 0.001276751 | 0.007425575 | -0.211623637 | -0.060381922 | ADTRP                                |

|       |           |           |      |   |   |             |             |             |             |              |              |             |
|-------|-----------|-----------|------|---|---|-------------|-------------|-------------|-------------|--------------|--------------|-------------|
| chr17 | 19174172  | 19174605  | 434  | * | 2 | 1.62725E-11 | 0.000442971 | 0.001277554 | 0.00049036  | 0.137865083  | 0.085900565  | EPN2        |
| chr10 | 134511545 | 134512224 | 680  | * | 3 | 4.72268E-12 | 0.150935793 | 0.001278448 | 0.005475412 | 0.160526091  | 0.061665213  | INPP5A      |
| chr11 | 73721165  | 73721374  | 210  | * | 3 | 2.34812E-17 | 0.001308881 | 0.001278508 | 7.34461E-05 | 0.203461286  | 0.123184275  |             |
| chr3  | 171528573 | 171529610 | 1038 | * | 7 | 1.30665E-28 | 0.000251297 | 0.001279786 | 2.06939E-05 | -0.32406068  | -0.126412162 | PLD1        |
| chr5  | 67730071  | 67731643  | 1573 | * | 6 | 1.05502E-15 | 0.002553146 | 0.001280026 | 0.000144171 | -0.149460035 | 0.019419389  | CTC-537E7.3 |
| chr3  | 149241941 | 149242458 | 518  | * | 2 | 2.26838E-11 | 0.001049842 | 0.001281376 | 0.000863555 | -0.150873063 | -0.129720603 | WWTR1       |
| chr10 | 29976889  | 29977335  | 447  | * | 3 | 4.03842E-14 | 0.000703885 | 0.001281993 | 0.000555325 | -0.328962986 | -0.152785286 | SVIL        |
| chr17 | 9923497   | 9924869   | 1373 | * | 6 | 4.10616E-18 | 5.24185E-08 | 0.001284954 | 6.48011E-08 | -0.279343622 | -0.131244314 | GAS7        |
| chr14 | 70186289  | 70186639  | 351  | * | 4 | 1.81873E-21 | 1.5721E-07  | 0.001287405 | 6.47216E-07 | -0.313690328 | -0.225352078 |             |
| chr19 | 42816045  | 42816803  | 759  | * | 2 | 2.88282E-12 | 0.063973827 | 0.001288519 | 0.00469564  | 0.151480632  | 0.07299224   |             |
| chr17 | 70974212  | 70974552  | 341  | * | 2 | 1.33526E-10 | 0.00144649  | 0.001292883 | 0.001053635 | -0.208691886 | -0.069863691 | SLC39A11    |
| chr8  | 128805414 | 128806271 | 858  | * | 4 | 1.6731E-13  | 0.091228856 | 0.001294631 | 0.010286577 | -0.336135558 | -0.072773338 |             |
| chr5  | 122765476 | 122765825 | 350  | * | 2 | 5.44755E-15 | 1.26774E-05 | 0.00129486  | 2.90894E-05 | -0.196651924 | -0.172287295 |             |
| chr11 | 3177622   | 3178322   | 701  | * | 7 | 1.47004E-34 | 2.22575E-08 | 0.001296715 | 5.09102E-09 | -0.277965861 | -0.19293461  | OSBPL5      |
| chr14 | 23583133  | 23584303  | 1171 | * | 3 | 4.73767E-11 | 6.17316E-05 | 0.001296917 | 4.22223E-05 | -0.250901437 | -0.132635205 |             |
| chr11 | 66979798  | 66980547  | 750  | * | 2 | 3.4735E-12  | 1.57646E-05 | 0.001302561 | 3.52743E-05 | -0.274726703 | -0.226439352 | KDM2A       |
| chr7  | 7557590   | 7557741   | 152  | * | 2 | 6.75426E-09 | 0.083048877 | 0.001302838 | 0.004930833 | -0.25653345  | -0.130242433 | COL28A1     |
| chr9  | 137301117 | 137302231 | 1115 | * | 6 | 1.96786E-31 | 1.2926E-08  | 0.001306241 | 1.68601E-08 | -0.314211385 | -0.139533554 | RXRA        |
| chr6  | 147091024 | 147092242 | 1219 | * | 6 | 2.73499E-25 | 5.85954E-05 | 0.001307689 | 1.2699E-05  | -0.291849255 | -0.100006339 | ADGB        |
| chr17 | 3861144   | 3861634   | 491  | * | 5 | 2.26118E-11 | 0.291276847 | 0.001307844 | 0.02951444  | -0.251471776 | -0.047662915 | ATP2A3      |
| chr11 | 46720913  | 46721921  | 1009 | * | 3 | 3.21762E-17 | 0.02986198  | 0.001308014 | 0.005719509 | -0.231317947 | -0.082869573 | ARHGAP1     |
| chr12 | 53610295  | 53610772  | 478  | * | 2 | 7.43197E-12 | 0.004966479 | 0.001308885 | 0.002057063 | 0.132839847  | 0.090821979  | RARG        |
| chr12 | 111655037 | 111655507 | 471  | * | 4 | 3.47049E-11 | 0.384340683 | 0.001309704 | 0.022540526 | -0.134654175 | -0.041001471 | CUX2        |
| chr16 | 87588559  | 87588893  | 335  | * | 3 | 2.33064E-11 | 0.063102208 | 0.001310669 | 0.003437974 | -0.186831708 | -0.042624031 |             |
| chr3  | 117158482 | 117158774 | 293  | * | 2 | 2.2754E-09  | 0.057573089 | 0.001311889 | 0.004677477 | -0.343831998 | -0.177550271 | LSAMP       |
| chr17 | 1690794   | 1691057   | 264  | * | 2 | 1.91153E-09 | 0.015537495 | 0.001311971 | 0.003302453 | 0.202988569  | 0.095206184  | SMYD4       |
| chr19 | 15390948  | 15392457  | 1510 | * | 9 | 1.15361E-39 | 1.88465E-08 | 0.001312159 | 2.78071E-09 | -0.348922278 | -0.108087387 | BRD4        |
| chr10 | 5932700   | 5933311   | 612  | * | 3 | 1.6182E-12  | 0.039409209 | 0.001312593 | 0.003767479 | 0.115848804  | 0.036693573  | FBXO18      |
| chr1  | 156465749 | 156467188 | 1440 | * | 5 | 3.71797E-17 | 1.11698E-06 | 0.001314282 | 2.42516E-06 | 0.161561398  | 0.121699112  | MEF2D       |



|       |           |           |      |   |    |             |             |             |             |              |              |                            |
|-------|-----------|-----------|------|---|----|-------------|-------------|-------------|-------------|--------------|--------------|----------------------------|
| chr10 | 104381522 | 104381651 | 130  | * | 2  | 4.27424E-15 | 1.07083E-05 | 0.001314556 | 2.50996E-05 | 0.186588725  | 0.182203374  | SUFU                       |
| chr6  | 75982940  | 75983278  | 339  | * | 3  | 2.54677E-18 | 1.09501E-06 | 0.001316983 | 3.67414E-06 | -0.350655187 | -0.21897597  | TMEM30A                    |
| chr6  | 134537845 | 134538515 | 671  | * | 2  | 1.12994E-12 | 1.36691E-05 | 0.001317633 | 3.1177E-05  | -0.293129787 | -0.251607081 | SGK1                       |
| chr2  | 219609824 | 219610606 | 783  | * | 3  | 1.45165E-12 | 0.001708147 | 0.00131883  | 0.001119643 | -0.33412503  | -0.107882648 | TTLL4                      |
| chr3  | 56625176  | 56625471  | 296  | * | 2  | 8.73316E-12 | 0.000154767 | 0.001320655 | 0.00023163  | -0.275764802 | -0.16894881  | CCDC66                     |
| chr1  | 159046391 | 159047177 | 787  | * | 8  | 2.57537E-32 | 7.75639E-06 | 0.001321191 | 2.91787E-07 | -0.220088282 | -0.086423585 | AIM2                       |
| chr7  | 36776674  | 36776989  | 316  | * | 2  | 2.62207E-10 | 0.010397403 | 0.001321238 | 0.002857983 | -0.205772002 | -0.124767487 |                            |
| chr17 | 48367746  | 48368059  | 314  | * | 2  | 1.62917E-09 | 0.030675516 | 0.001321584 | 0.004088588 | -0.101994589 | -0.036562904 |                            |
| chr12 | 76955696  | 76956058  | 363  | * | 2  | 1.80742E-11 | 0.002324422 | 0.001321638 | 0.001399058 | -0.158041414 | -0.122408001 |                            |
| chr13 | 99223336  | 99223562  | 227  | * | 2  | 5.49181E-10 | 0.010324662 | 0.001323281 | 0.002853025 | 0.184630115  | 0.101088029  | STK24                      |
| chr10 | 100074395 | 100074568 | 174  | * | 2  | 5.45086E-10 | 0.007116321 | 0.001323531 | 0.002442325 | -0.226799218 | -0.085052571 |                            |
| chr14 | 21898688  | 21899093  | 406  | * | 3  | 1.2621E-12  | 0.023468572 | 0.001324696 | 0.005103007 | -0.268129235 | -0.094546948 | CHD8                       |
| chr4  | 41983325  | 41984148  | 824  | * | 6  | 2.08075E-21 | 0.002964929 | 0.001325899 | 0.000141271 | -0.280475827 | -0.09912103  | DCAF4L1                    |
| chr8  | 59067871  | 59068143  | 273  | * | 2  | 7.64196E-12 | 0.000133321 | 0.001326266 | 0.000206919 | -0.163466587 | -0.135673417 | FAM110B                    |
| chr10 | 11682351  | 11682423  | 73   | * | 2  | 9.9651E-13  | 3.77389E-05 | 0.00132688  | 7.48623E-05 | -0.34994417  | -0.280067369 |                            |
| chr12 | 132280296 | 132280704 | 409  | * | 3  | 3.47677E-13 | 0.001401528 | 0.001326897 | 0.001019435 | -0.292388551 | -0.148937491 | SFSWAP                     |
| chr17 | 400410    | 400920    | 511  | * | 3  | 1.6182E-12  | 0.011736702 | 0.001327529 | 0.001687713 | 0.210272879  | 0.090639062  |                            |
| chr2  | 43767347  | 43768564  | 1218 | * | 4  | 1.59738E-18 | 1.19593E-07 | 0.00132866  | 5.93352E-07 | -0.269901258 | -0.189706979 | THADA                      |
| chr10 | 5593559   | 5593926   | 368  | * | 2  | 3.4048E-10  | 0.017419969 | 0.001330178 | 0.003467947 | 0.140885041  | 0.078342962  |                            |
| chr9  | 130007437 | 130007838 | 402  | * | 4  | 4.21349E-11 | 0.037908961 | 0.001330668 | 0.006887489 | 0.035721646  | 0.010849396  | GARNL3                     |
| chr12 | 50066533  | 50068610  | 2078 | * | 6  | 2.68059E-21 | 7.66365E-09 | 0.001331513 | 4.11895E-08 | 0.20352587   | 0.117819726  | FMNL3                      |
| chr17 | 56354594  | 56355431  | 838  | * | 4  | 2.25261E-24 | 1.62519E-09 | 0.001332189 | 1.7773E-08  | -0.24473065  | -0.205925405 | MPO                        |
| chr1  | 24796905  | 24797333  | 429  | * | 4  | 4.91628E-18 | 0.013951803 | 0.001332678 | 0.000268051 | -0.252561205 | -0.124051045 | NIPAL3                     |
| chr4  | 140810584 | 140813287 | 2704 | * | 11 | 6.87816E-32 | 0.000213282 | 0.001332764 | 7.49984E-08 | -0.304433514 | -0.045673694 | MAML3                      |
| chr12 | 96199743  | 96199841  | 99   | * | 2  | 4.10572E-09 | 0.009045421 | 0.001334053 | 0.00271903  | 0.178321034  | 0.105232024  | RP11-536G4.1, RP11-536G4.2 |
| chr5  | 150480839 | 150480993 | 155  | * | 2  | 3.06271E-15 | 1.09347E-05 | 0.001334456 | 2.56289E-05 | 0.161535008  | 0.155751611  | ANXA6                      |
| chr21 | 39600121  | 39601779  | 1659 | * | 8  | 3.44989E-22 | 0.000828574 | 0.001338342 | 2.449E-07   | -0.322173687 | -0.144724336 | KCNJ15                     |
| chr3  | 15446547  | 15446747  | 201  | * | 2  | 1.05263E-10 | 0.000503531 | 0.001340794 | 0.000546179 | -0.307282581 | -0.171484016 | METTL6                     |
| chr8  | 28233035  | 28234388  | 1354 | * | 5  | 4.90511E-15 | 4.47706E-05 | 0.001340924 | 7.42346E-05 | -0.357119794 | -0.104273592 | ZNF395, FBXO16             |

|       |           |           |      |   |    |             |             |             |             |              |              |                        |
|-------|-----------|-----------|------|---|----|-------------|-------------|-------------|-------------|--------------|--------------|------------------------|
| chr12 | 112215328 | 112215782 | 455  | * | 2  | 1.33076E-13 | 1.09369E-05 | 0.001341271 | 2.56528E-05 | -0.319132669 | -0.232948889 | RP11-162P23.2, ALDH2   |
| chr19 | 827429    | 828170    | 742  | * | 10 | 3.11657E-57 | 7.58615E-19 | 0.001343025 | 3.82412E-16 | -0.307190906 | -0.176619292 | AZU1                   |
| chr17 | 73304723  | 73305193  | 471  | * | 3  | 9.38087E-20 | 1.00916E-07 | 0.001344745 | 5.3033E-07  | -0.290552793 | -0.240776928 |                        |
| chr9  | 139886304 | 139887683 | 1380 | * | 10 | 9.12114E-25 | 0.022574986 | 0.001345828 | 0.001696247 | -0.086105293 | -0.001971951 | C9orf142               |
| chr11 | 47608310  | 47609357  | 1048 | * | 4  | 8.42652E-14 | 0.056475387 | 0.001346477 | 0.007899421 | -0.231533291 | -0.057683335 | FAM180B                |
| chr2  | 236522903 | 236523362 | 460  | * | 3  | 7.8976E-16  | 0.000282204 | 0.001346962 | 8.69678E-05 | 0.174161583  | 0.088578763  | AGAP1                  |
| chr2  | 28304009  | 28304502  | 494  | * | 3  | 7.91079E-12 | 0.006548427 | 0.00134701  | 0.001902193 | -0.233085655 | -0.052159785 | BRE                    |
| chr10 | 7226492   | 7226892   | 401  | * | 2  | 1.19506E-10 | 0.044629196 | 0.001348299 | 0.004544043 | -0.180718442 | -0.086565208 | SFMBT2                 |
| chr15 | 63823236  | 63824532  | 1297 | * | 3  | 1.03245E-13 | 0.001298005 | 0.001348471 | 9.60589E-05 | -0.296527218 | -0.154582624 | USP3                   |
| chr17 | 39092846  | 39093054  | 209  | * | 2  | 4.10676E-11 | 0.032441453 | 0.001349531 | 0.004215702 | -0.239391767 | -0.111247189 | AC004231.2, KRT23      |
| chr21 | 17054876  | 17055183  | 308  | * | 2  | 6.91835E-10 | 0.004654987 | 0.001352125 | 0.002033935 | -0.32067955  | -0.197397724 |                        |
| chr1  | 28269763  | 28270137  | 375  | * | 2  | 5.96095E-14 | 1.14198E-05 | 0.001358657 | 2.67106E-05 | -0.241522381 | -0.176842186 | SMPDL3B, RP11-460I13.2 |
| chr15 | 39803760  | 39803814  | 55   | * | 2  | 4.5782E-10  | 0.000922561 | 0.001359292 | 0.000818962 | 0.189735765  | 0.110953131  |                        |
| chr7  | 2606716   | 2607424   | 709  | * | 7  | 1.84836E-24 | 0.008080558 | 0.001360362 | 8.62436E-05 | -0.34092759  | -0.059200033 | IQCE                   |
| chr12 | 76338627  | 76338898  | 272  | * | 2  | 2.94489E-09 | 0.031702177 | 0.001360732 | 0.004217164 | 0.158848852  | 0.082270448  | RP11-114H23.1          |
| chr6  | 32945234  | 32946446  | 1213 | * | 10 | 8.01673E-16 | 0.990746211 | 0.001361517 | 0.389811229 | -0.352622932 | -0.033467253 | BRD2                   |
| chr9  | 131007914 | 131007980 | 67   | * | 2  | 4.55153E-10 | 0.003534725 | 0.001362033 | 0.001779906 | -0.224065332 | -0.123855569 | DNM1                   |
| chr11 | 71846733  | 71846788  | 56   | * | 2  | 3.20631E-14 | 1.40375E-05 | 0.001362776 | 3.20908E-05 | -0.263529725 | -0.244506068 | FOLR3                  |
| chr22 | 38430277  | 38430796  | 520  | * | 3  | 5.869E-17   | 3.90649E-05 | 0.001364427 | 3.20064E-05 | -0.121640548 | -0.042852588 | POLR2F                 |
| chr1  | 19217472  | 19218212  | 741  | * | 3  | 1.20636E-18 | 0.0077393   | 0.001367303 | 0.000202699 | -0.249983227 | -0.13041382  | RP13-279N23.2, ALDH4A1 |
| chr10 | 126453317 | 126454007 | 691  | * | 3  | 2.16055E-13 | 0.000330518 | 0.001368583 | 0.000395865 | -0.361643683 | -0.171029791 | RP11-12J10.3, METTL10  |
| chr11 | 96065844  | 96065862  | 19   | * | 2  | 6.18953E-14 | 1.18036E-05 | 0.001368814 | 2.75389E-05 | -0.27334014  | -0.252393785 | MAML2                  |
| chr17 | 41376588  | 41376758  | 171  | * | 3  | 2.93648E-10 | 0.01221562  | 0.001369717 | 0.003703942 | -0.298711005 | -0.133580986 | LINC00854              |
| chr11 | 3188566   | 3189207   | 642  | * | 3  | 4.9302E-19  | 0.001636091 | 0.001370054 | 8.47427E-05 | -0.296589688 | -0.188854675 |                        |
| chr7  | 99076604  | 99077294  | 691  | * | 3  | 9.90724E-17 | 3.27947E-06 | 0.001370227 | 1.09018E-05 | 0.166124022  | 0.139401488  | ZNF789                 |
| chr2  | 102759368 | 102759782 | 415  | * | 3  | 1.9009E-13  | 0.004572276 | 0.001371417 | 0.002093624 | -0.169987544 | -0.066969174 | IL1R1                  |
| chr17 | 76340915  | 76341204  | 290  | * | 2  | 1.77661E-09 | 0.012995062 | 0.001371784 | 0.003194985 | -0.217625026 | -0.092716062 | AC061992.2             |
| chr19 | 56608297  | 56609064  | 768  | * | 5  | 4.37778E-23 | 5.21455E-07 | 0.001374131 | 7.00428E-07 | 0.211112237  | 0.125411946  | ZNF787                 |
| chr10 | 134020204 | 134020998 | 795  | * | 3  | 3.26685E-13 | 0.059727773 | 0.001374858 | 0.006441541 | 0.232138171  | 0.097374012  | STK32C                 |

|       |           |           |      |   |    |             |             |             |             |              |              |                              |
|-------|-----------|-----------|------|---|----|-------------|-------------|-------------|-------------|--------------|--------------|------------------------------|
| chr3  | 42631429  | 42632121  | 693  | * | 4  | 2.48262E-18 | 0.004821656 | 0.001375802 | 0.000568012 | -0.300162285 | -0.101166419 | SS18L2, SEC22C               |
| chr1  | 153366428 | 153366607 | 180  | * | 2  | 4.49151E-14 | 1.14844E-05 | 0.001376128 | 2.68963E-05 | -0.268714015 | -0.241729324 |                              |
| chr7  | 97923799  | 97923834  | 36   | * | 2  | 2.72728E-14 | 5.35729E-05 | 0.001376145 | 0.00010103  | -0.157687952 | -0.131232895 | BRI3, BAIAP2L1               |
| chr7  | 1982333   | 1983984   | 1652 | * | 7  | 4.47594E-22 | 0.00012033  | 0.001377406 | 2.70004E-05 | -0.418639852 | -0.075069437 | MAD1L1                       |
| chr16 | 85207349  | 85208316  | 968  | * | 4  | 5.84974E-16 | 0.000379266 | 0.001377539 | 0.00020113  | 0.236083456  | 0.114986002  | CTC-786C10.1                 |
| chr13 | 114834683 | 114834922 | 240  | * | 2  | 1.65146E-10 | 0.06062222  | 0.00137813  | 0.004913375 | -0.243995819 | -0.131287222 | RASA3                        |
| chr9  | 129893312 | 129894158 | 847  | * | 5  | 4.00011E-14 | 0.044725232 | 0.001380942 | 0.00692168  | -0.286918678 | -0.066752404 | RALGPS1                      |
| chr1  | 108622363 | 108622429 | 67   | * | 2  | 3.46033E-11 | 0.000182975 | 0.001382782 | 0.000266965 | 0.050559437  | 0.049192462  |                              |
| chr16 | 88679600  | 88679919  | 320  | * | 4  | 1.75603E-10 | 0.180637131 | 0.001383065 | 0.020095614 | -0.24204615  | -0.074214014 | ZC3H18                       |
| chr12 | 125420722 | 125420914 | 193  | * | 3  | 3.54409E-15 | 1.00644E-05 | 0.001383922 | 2.75074E-05 | -0.296387788 | -0.164817943 |                              |
| chr8  | 52873103  | 52874692  | 1590 | * | 7  | 9.46859E-30 | 4.86539E-05 | 0.001384995 | 1.79841E-06 | -0.223054772 | -0.093752598 | RP11-546K22.1                |
| chr7  | 37023984  | 37024713  | 730  | * | 3  | 2.1156E-15  | 2.95778E-05 | 0.001387121 | 6.53643E-05 | -0.186508473 | -0.120439921 | ELMO1                        |
| chr6  | 159240283 | 159241461 | 1179 | * | 10 | 5.39056E-25 | 0.525100006 | 0.001387631 | 0.011227836 | -0.387991249 | -0.06628422  | EZR-AS1, EZR                 |
| chr7  | 101671556 | 101672056 | 501  | * | 2  | 1.82222E-12 | 7.22759E-05 | 0.001387677 | 0.000129276 | -0.275214086 | -0.200405417 | CUX1                         |
| chr9  | 32565609  | 32566125  | 517  | * | 2  | 8.36521E-12 | 0.015226864 | 0.001387842 | 0.003412332 | 0.204475927  | 0.092409453  | TOPORS-AS1, NDUFB6           |
| chr3  | 141524149 | 141524333 | 185  | * | 2  | 4.7218E-09  | 0.015841844 | 0.00138787  | 0.003460328 | 0.199233278  | 0.111232829  | GRK7                         |
| chr1  | 33804213  | 33804514  | 302  | * | 2  | 6.36864E-10 | 0.066182913 | 0.001388457 | 0.00501926  | -0.317919441 | -0.163376675 | PHC2                         |
| chr2  | 33359059  | 33359688  | 630  | * | 11 | 3.3052E-48  | 3.16389E-13 | 0.001392641 | 3.62308E-12 | -0.254251485 | -0.122699606 | LTBP1                        |
| chr5  | 176836472 | 176837920 | 1449 | * | 6  | 3.76303E-14 | 0.013685051 | 0.001392717 | 0.00034965  | -0.279242659 | -0.101629871 | GRK6, F12                    |
| chr16 | 67560245  | 67560556  | 312  | * | 2  | 1.47586E-11 | 0.000574418 | 0.001394492 | 0.000607217 | 0.144650297  | 0.103823556  | FAM65A                       |
| chr1  | 3507069   | 3507151   | 83   | * | 2  | 1.22394E-10 | 0.000548887 | 0.001394805 | 0.000588876 | -0.154225314 | -0.111251878 | MEGF6                        |
| chr6  | 108878861 | 108879314 | 454  | * | 2  | 5.36665E-13 | 0.000980496 | 0.001394839 | 0.000861597 | 0.034662862  | 0.007447329  |                              |
| chr16 | 88228257  | 88228780  | 524  | * | 5  | 1.63688E-15 | 0.025980119 | 0.001397882 | 0.001390133 | -0.261022535 | -0.089763906 | LA16c-444G7.2                |
| chr16 | 4729905   | 4730465   | 561  | * | 4  | 8.24061E-25 | 5.67453E-09 | 0.001398192 | 5.24994E-08 | -0.259951916 | -0.237443505 | MGRN1                        |
| chr17 | 74593349  | 74594038  | 690  | * | 3  | 1.3109E-14  | 0.00886749  | 0.001398243 | 0.000614029 | -0.301987141 | -0.148681102 |                              |
| chr11 | 67050236  | 67053829  | 3594 | * | 10 | 3.44759E-34 | 5.44619E-14 | 0.001399747 | 3.58714E-12 | -0.337930452 | -0.211412755 | ADRBK1                       |
| chr1  | 2171253   | 2172659   | 1407 | * | 5  | 1.12779E-24 | 0.000850026 | 0.001401847 | 5.33791E-06 | -0.239727125 | -0.130441537 | SKI                          |
| chr7  | 41741320  | 41741671  | 352  | * | 3  | 8.48388E-10 | 0.493267149 | 0.001403826 | 0.015897352 | 0.20417697   | 0.073346824  | INHBA-AS1, AC005027.3, INHBA |
| chr17 | 29151924  | 29151953  | 30   | * | 2  | 1.23783E-07 | 0.07447057  | 0.001406997 | 0.005171679 | 0.024928999  | 0.013229613  |                              |

|       |           |           |      |   |    |             |             |             |             |              |              |                   |
|-------|-----------|-----------|------|---|----|-------------|-------------|-------------|-------------|--------------|--------------|-------------------|
| chr1  | 249110746 | 249111789 | 1044 | * | 6  | 2.0757E-28  | 4.267E-07   | 0.001408426 | 3.1378E-07  | -0.346350763 | -0.157549447 | SH3BP5L           |
| chr2  | 106360196 | 106361676 | 1481 | * | 6  | 9.74973E-22 | 0.002079541 | 0.001409574 | 0.000102563 | 0.102021411  | -0.011596153 | NCK2              |
| chr19 | 3521010   | 3521502   | 493  | * | 5  | 2.20223E-27 | 4.16666E-09 | 0.001410012 | 3.63685E-08 | -0.193270561 | 0.010072213  | FZR1, SNORD38     |
| chr13 | 41929843  | 41930111  | 269  | * | 2  | 1.8952E-10  | 0.029162364 | 0.001411547 | 0.004240426 | -0.249249663 | -0.135207536 | NAA16             |
| chr6  | 116691382 | 116692074 | 693  | * | 6  | 6.68626E-25 | 4.59874E-07 | 0.001412982 | 1.2349E-06  | -0.139979309 | -0.066336631 | DSE, RP1-93H18.1  |
| chr2  | 242139599 | 242139924 | 326  | * | 3  | 1.04208E-16 | 5.88514E-05 | 0.001414503 | 8.24902E-05 | -0.306653639 | -0.149199908 | ANO7              |
| chr2  | 166982292 | 166983534 | 1243 | * | 4  | 2.16479E-18 | 0.007394163 | 0.001414655 | 0.000348045 | -0.269618209 | -0.094910236 | AC010127.3, SCN1A |
| chr16 | 880206    | 880371    | 166  | * | 2  | 6.0896E-09  | 0.199279601 | 0.0014151   | 0.0057259   | 0.15132605   | 0.069586351  |                   |
| chr21 | 47038433  | 47038905  | 473  | * | 3  | 6.03463E-18 | 1.61794E-06 | 0.001416183 | 5.07507E-06 | -0.283818371 | -0.166805738 |                   |
| chr17 | 44248233  | 44248641  | 409  | * | 3  | 2.97079E-20 | 7.67463E-06 | 0.001416758 | 1.39879E-05 | -0.300875287 | -0.17841993  | KANSL1            |
| chr12 | 15103680  | 15104916  | 1237 | * | 4  | 1.63525E-22 | 0.000206376 | 0.001419041 | 6.21691E-06 | 0.197892596  | 0.109054535  | ARHGDIB           |
| chr11 | 12146343  | 12147260  | 918  | * | 3  | 5.5978E-12  | 0.007913154 | 0.001421005 | 0.003086665 | -0.194926244 | -0.05937319  | MICAL2            |
| chr7  | 2653651   | 2654420   | 770  | * | 6  | 1.26824E-26 | 5.55141E-05 | 0.001422296 | 1.06878E-06 | 0.297900456  | 0.074816802  | IQCE              |
| chr19 | 16254282  | 16254516  | 235  | * | 5  | 2.22122E-18 | 0.000619216 | 0.001423277 | 4.36828E-05 | -0.16918701  | -0.064410316 | HSH2D             |
| chr14 | 100900810 | 100900999 | 190  | * | 2  | 1.29784E-13 | 3.76754E-05 | 0.001426322 | 7.59563E-05 | -0.259696749 | -0.258644607 | WDR25             |
| chr5  | 133841762 | 133842146 | 385  | * | 4  | 6.78445E-16 | 3.3195E-05  | 0.001426332 | 6.55311E-05 | 0.167117296  | 0.09026487   |                   |
| chr17 | 79967022  | 79967042  | 21   | * | 3  | 5.49517E-10 | 0.152206159 | 0.001427854 | 0.012158294 | 0.145309646  | 0.061303705  | ASPSCR1           |
| chr1  | 224545104 | 224545736 | 633  | * | 4  | 8.1319E-17  | 0.060892878 | 0.001430724 | 0.003958264 | -0.311029031 | -0.091479295 | CNIH4             |
| chr1  | 92951594  | 92953279  | 1686 | * | 26 | 1.71508E-72 | 8.37802E-05 | 0.001432717 | 1.79702E-09 | -0.360694708 | -0.059967885 | GFI1              |
| chr7  | 90794392  | 90794769  | 378  | * | 3  | 8.72952E-15 | 0.00649082  | 0.00143325  | 0.000206609 | -0.25568342  | -0.144510292 | CDK14             |
| chr6  | 16684297  | 16684836  | 540  | * | 2  | 7.06934E-13 | 2.80911E-05 | 0.001433638 | 5.92364E-05 | -0.116992499 | -0.115219228 | ATXN1             |
| chr1  | 8273352   | 8274044   | 693  | * | 4  | 2.31983E-22 | 1.29789E-05 | 0.001434896 | 1.71455E-06 | -0.272744764 | -0.189263343 | RP11-431K24.3     |
| chr5  | 169727643 | 169727897 | 255  | * | 2  | 4.88768E-11 | 0.000308257 | 0.001435858 | 0.000397615 | -0.2754453   | -0.184824234 |                   |
| chr1  | 236094805 | 236096728 | 1924 | * | 5  | 7.53475E-20 | 2.81698E-09 | 0.001436242 | 2.65042E-08 | -0.357007482 | -0.201054781 |                   |
| chr21 | 46332181  | 46332291  | 111  | * | 2  | 3.25449E-10 | 0.004964471 | 0.001436999 | 0.002177517 | -0.229610313 | -0.130218099 | ITGB2             |
| chr19 | 15751297  | 15751949  | 653  | * | 2  | 2.18247E-14 | 0.000338925 | 0.001437098 | 0.000425815 | -0.219531004 | -0.15452378  | CYP4F3            |
| chr7  | 158892077 | 158892397 | 321  | * | 2  | 2.32347E-09 | 0.055283173 | 0.00143869  | 0.005000004 | 0.153550742  | 0.078925582  | VIPR2             |
| chr1  | 47051416  | 47053057  | 1642 | * | 5  | 9.91522E-11 | 0.203898489 | 0.001438932 | 0.001300192 | -0.317781241 | -0.126146021 | MKNK1             |
| chr21 | 44166975  | 44167104  | 130  | * | 2  | 2.50181E-10 | 0.002524216 | 0.001439037 | 0.001534299 | -0.352845254 | -0.254907276 | PDE9A             |

|       |           |           |      |   |    |             |             |             |             |              |              |                       |
|-------|-----------|-----------|------|---|----|-------------|-------------|-------------|-------------|--------------|--------------|-----------------------|
| chr14 | 74862615  | 74862957  | 343  | * | 2  | 3.29753E-11 | 0.000322615 | 0.001439699 | 0.00041129  | 0.177806794  | 0.130963342  |                       |
| chr11 | 64532839  | 64533623  | 785  | * | 7  | 1.2753E-18  | 0.010993293 | 0.001441467 | 0.000590201 | 0.146558585  | 0.045764825  | SF1                   |
| chr15 | 90547692  | 90548061  | 370  | * | 4  | 2.9206E-21  | 3.60103E-07 | 0.00144203  | 1.43725E-06 | -0.326683419 | -0.200982401 | ZNF710                |
| chr12 | 124069475 | 124070499 | 1025 | * | 8  | 4.45595E-22 | 0.104462689 | 0.001442455 | 0.004386576 | -0.319266608 | -0.070895836 | TMED2, RP11-486O12.2  |
| chr8  | 129061048 | 129061665 | 618  | * | 5  | 5.08523E-15 | 0.280392644 | 0.001442557 | 0.030499975 | -0.103027027 | -0.016486627 | PVT1, MIR1207         |
| chr2  | 9894165   | 9894734   | 570  | * | 4  | 2.79475E-20 | 2.4972E-06  | 0.001442838 | 6.86036E-06 | 0.130272735  | 0.094864466  |                       |
| chr1  | 234905686 | 234906223 | 538  | * | 3  | 2.56172E-15 | 7.45585E-05 | 0.001443911 | 5.65952E-05 | 0.187643714  | 0.124788407  |                       |
| chr6  | 32060681  | 32061478  | 798  | * | 6  | 1.79175E-22 | 0.005259389 | 0.001447534 | 0.000226048 | 0.210298817  | 0.077411683  | TNXB                  |
| chr1  | 204110366 | 204111253 | 888  | * | 6  | 6.79503E-13 | 0.512023617 | 0.001449136 | 0.046614528 | 0.148272436  | 0.029957861  | RP11-74C13.3, ETNK2   |
| chr22 | 25799070  | 25800078  | 1009 | * | 4  | 2.75661E-19 | 1.84278E-06 | 0.001449421 | 4.24054E-06 | -0.158164118 | -0.106880225 | LRP5L                 |
| chr1  | 25235737  | 25235862  | 126  | * | 2  | 1.90385E-10 | 0.036188561 | 0.001449557 | 0.004579302 | 0.18794612   | 0.091529505  | RUNX3                 |
| chr7  | 127997529 | 127998600 | 1072 | * | 3  | 1.0578E-14  | 5.71065E-07 | 0.001450037 | 2.43439E-06 | -0.212564781 | -0.055054749 | PRRT4                 |
| chr4  | 154001159 | 154001197 | 39   | * | 2  | 9.47983E-11 | 0.000277537 | 0.001452543 | 0.000369991 | -0.140062823 | -0.100982293 | RP11-285C1.2          |
| chr17 | 8761973   | 8762140   | 168  | * | 3  | 1.39648E-16 | 3.94333E-06 | 0.001454108 | 1.22161E-05 | -0.183247202 | -0.151451376 | PIK3R6                |
| chr20 | 48837617  | 48838080  | 464  | * | 2  | 2.46593E-13 | 2.12156E-05 | 0.001455012 | 4.66085E-05 | -0.249087647 | -0.224113005 |                       |
| chr14 | 24539335  | 24540773  | 1439 | * | 13 | 4.18471E-48 | 1.66156E-10 | 0.001456273 | 1.21306E-10 | -0.355686011 | -0.125700277 | CPNE6                 |
| chr2  | 27665711  | 27666036  | 326  | * | 2  | 4.71735E-12 | 0.017997988 | 0.001457003 | 0.003743158 | 0.14894172   | 0.081719612  | KRTCAP3               |
| chr19 | 47122109  | 47122445  | 337  | * | 2  | 1.03479E-09 | 0.022578526 | 0.001457147 | 0.004029017 | -0.056510275 | -0.033320455 |                       |
| chr10 | 75534560  | 75534675  | 116  | * | 2  | 2.09893E-10 | 0.007495754 | 0.001457304 | 0.002658557 | -0.09545695  | -0.035805438 | FUT11                 |
| chr22 | 37960396  | 37960426  | 31   | * | 2  | 1.01573E-12 | 5.78123E-05 | 0.001458668 | 0.000109111 | 0.189909415  | 0.145658398  | CDC42EP1              |
| chr17 | 2264242   | 2265510   | 1269 | * | 7  | 1.81344E-20 | 0.067764869 | 0.001459048 | 0.002551652 | -0.16537219  | -0.044609827 | SGSM2                 |
| chr2  | 102927278 | 102927898 | 621  | * | 5  | 8.46937E-12 | 0.118351853 | 0.001459081 | 0.014906153 | -0.194014608 | -0.06062135  |                       |
| chr15 | 90291404  | 90291815  | 412  | * | 3  | 1.23101E-13 | 0.018473951 | 0.001459163 | 0.001234499 | -0.215755217 | -0.105611379 |                       |
| chr22 | 42336869  | 42337222  | 354  | * | 2  | 1.77031E-09 | 0.076770892 | 0.001460766 | 0.005358602 | -0.204867304 | -0.098356494 | CENPM                 |
| chr16 | 89461734  | 89462661  | 928  | * | 6  | 3.35916E-26 | 2.04493E-05 | 0.001461433 | 1.1748E-05  | -0.33960222  | -0.072383113 | ANKRD11, RP1-168P16.2 |
| chr1  | 9133353   | 9133414   | 62   | * | 2  | 1.65076E-13 | 2.33059E-05 | 0.001462514 | 5.06196E-05 | -0.326004544 | -0.310103064 | SLC2A5                |
| chr8  | 116462301 | 116462556 | 256  | * | 2  | 8.07311E-10 | 0.002996267 | 0.001462541 | 0.001699667 | -0.098467688 | -0.061059819 | TRPS1                 |
| chr9  | 126232182 | 126232853 | 672  | * | 3  | 6.7301E-18  | 9.38322E-07 | 0.001463075 | 3.76486E-06 | -0.258074211 | -0.082993679 | DENND1A               |
| chr17 | 76818733  | 76820132  | 1400 | * | 6  | 1.25875E-21 | 0.010613152 | 0.001463173 | 0.000145546 | -0.285330319 | -0.086173951 | USP36                 |

|       |           |           |      |   |    |             |             |             |             |              |              |                   |
|-------|-----------|-----------|------|---|----|-------------|-------------|-------------|-------------|--------------|--------------|-------------------|
| chr16 | 50815179  | 50815307  | 129  | * | 2  | 1.50216E-08 | 0.144582231 | 0.001463756 | 0.005774773 | 0.202172115  | 0.101710898  | CYLD              |
| chr2  | 70188512  | 70189903  | 1392 | * | 7  | 2.3666E-30  | 3.48312E-05 | 0.001463848 | 2.39804E-06 | -0.379949763 | -0.11799295  | ASPRV1, PCBP1-AS1 |
| chr17 | 78796363  | 78797061  | 699  | * | 4  | 4.14813E-19 | 0.00031923  | 0.001464141 | 8.88554E-05 | -0.218594011 | -0.123466765 | RPTOR             |
| chr17 | 79054073  | 79054476  | 404  | * | 2  | 3.62109E-11 | 0.003555324 | 0.001464266 | 0.001861805 | 0.162319465  | 0.101964445  | BAIAP2            |
| chr10 | 89503133  | 89503153  | 21   | * | 2  | 1.76752E-09 | 0.004351968 | 0.001464706 | 0.002064433 | -0.236522213 | -0.124867398 | PAPSS2            |
| chr7  | 5258357   | 5258485   | 129  | * | 3  | 8.94407E-14 | 0.000266967 | 0.00146924  | 0.000336969 | -0.28764359  | -0.153956038 | WIPI2             |
| chr1  | 40029385  | 40030697  | 1313 | * | 9  | 4.51984E-30 | 0.000440968 | 0.001475692 | 1.61353E-05 | -0.216024473 | -0.058402871 | PABPC4            |
| chr3  | 195946195 | 195947062 | 868  | * | 7  | 4.21174E-28 | 9.20572E-06 | 0.001476461 | 6.3946E-07  | -0.391783307 | -0.15286873  | SLC51A, PCYT1A    |
| chr12 | 95034515  | 95034650  | 136  | * | 2  | 1.37396E-13 | 1.46732E-05 | 0.001476778 | 3.37987E-05 | -0.302297389 | -0.283186117 | TMCC3             |
| chr17 | 16344368  | 16344574  | 207  | * | 3  | 4.00217E-15 | 4.21091E-05 | 0.001476853 | 6.45981E-05 | -0.229486894 | -0.152536658 | FAM211A-AS1       |
| chr1  | 155940889 | 155941006 | 118  | * | 2  | 3.00864E-09 | 0.021770254 | 0.001478208 | 0.004025427 | -0.107907962 | -0.061554599 | ARHGEF2           |
| chr10 | 11937059  | 11937255  | 197  | * | 3  | 2.12627E-20 | 2.04129E-07 | 0.001479862 | 1.00485E-06 | 0.187586901  | 0.141796282  |                   |
| chr11 | 64483118  | 64483691  | 574  | * | 2  | 2.52593E-13 | 0.00249177  | 0.001479878 | 0.001546855 | 0.164181629  | 0.116628969  | NRXN2             |
| chr16 | 995827    | 996172    | 346  | * | 2  | 2.26408E-09 | 0.026258496 | 0.001479969 | 0.004265194 | -0.341045747 | -0.176678479 | LMF1              |
| chr3  | 107942749 | 107943092 | 344  | * | 2  | 2.7471E-13  | 0.000394877 | 0.001480097 | 0.000480142 | -0.182586242 | -0.129225809 |                   |
| chr1  | 26880207  | 26881684  | 1478 | * | 11 | 2.11172E-37 | 9.1996E-05  | 0.001480135 | 6.13794E-07 | -0.326942125 | -0.109896178 | RPS6KA1, MIR1976  |
| chr16 | 86011615  | 86012840  | 1226 | * | 8  | 1.29828E-32 | 9.54433E-05 | 0.001480615 | 1.60197E-06 | -0.239214035 | -0.081460638 |                   |
| chr9  | 132572181 | 132572194 | 14   | * | 2  | 7.31798E-09 | 0.022037198 | 0.001482751 | 0.004049996 | -0.181636133 | -0.095213142 | TOR1B             |
| chr2  | 86397937  | 86398455  | 519  | * | 2  | 2.14165E-11 | 0.002583016 | 0.00148915  | 0.001583396 | -0.287864395 | -0.167917824 | IMMT              |
| chr22 | 33158075  | 33158236  | 162  | * | 2  | 5.12004E-12 | 0.000109335 | 0.001489633 | 0.00018356  | 0.182861665  | 0.139125588  | SYN3              |
| chr2  | 197106919 | 197107109 | 191  | * | 2  | 1.18552E-08 | 0.249046171 | 0.001493123 | 0.006054357 | -0.107808426 | -0.053237022 | HECW2             |
| chr1  | 145523488 | 145523592 | 105  | * | 2  | 9.78572E-09 | 0.017069219 | 0.001493167 | 0.00374067  | 0.132848386  | 0.063721538  | PEX11B            |
| chr15 | 90605618  | 90608429  | 2812 | * | 7  | 1.35381E-14 | 3.96625E-08 | 0.001494264 | 1.68396E-07 | 0.162677234  | 0.009851565  | ZNF710            |
| chr10 | 85933300  | 85933798  | 499  | * | 3  | 6.43276E-14 | 0.038158568 | 0.001496249 | 0.001169836 | 0.162972979  | 0.083641347  | C10orf99          |
| chr7  | 101361395 | 101361745 | 351  | * | 3  | 2.4496E-19  | 1.87638E-07 | 0.00149727  | 9.34687E-07 | -0.242534029 | -0.217877192 |                   |
| chr8  | 142219329 | 142220329 | 1001 | * | 4  | 2.95224E-20 | 4.65625E-06 | 0.001498002 | 2.04757E-06 | -0.287114471 | -0.157369505 | SLC45A4           |
| chr4  | 24975717  | 24975754  | 38   | * | 2  | 2.20725E-13 | 1.70696E-05 | 0.00149861  | 3.8722E-05  | -0.223547406 | -0.207279744 | CCDC149           |
| chr9  | 138029495 | 138029591 | 97   | * | 2  | 2.49632E-11 | 0.000133923 | 0.001504303 | 0.00021587  | 0.145985543  | 0.134642707  |                   |
| chr8  | 142030202 | 142030569 | 368  | * | 3  | 3.50662E-13 | 0.001923586 | 0.001507925 | 0.000537571 | 0.184280741  | 0.069978155  |                   |

|       |           |           |      |   |   |             |             |             |             |              |              |                       |
|-------|-----------|-----------|------|---|---|-------------|-------------|-------------|-------------|--------------|--------------|-----------------------|
| chr21 | 46327720  | 46328106  | 387  | * | 2 | 4.74361E-10 | 0.005612805 | 0.001509567 | 0.002380318 | -0.054577625 | -0.045904902 | ITGB2                 |
| chr4  | 10075904  | 10076009  | 106  | * | 2 | 1.64414E-10 | 0.001753471 | 0.001509653 | 0.001278231 | 0.1967202    | 0.078539025  | WDR1                  |
| chr3  | 48408093  | 48408202  | 110  | * | 3 | 3.53256E-17 | 1.27341E-06 | 0.001512475 | 4.66252E-06 | -0.369189068 | -0.260967558 |                       |
| chr3  | 45688760  | 45689110  | 351  | * | 2 | 1.14266E-11 | 0.0001481   | 0.001513172 | 0.000233837 | -0.147046791 | -0.115807495 | LIMD1                 |
| chr5  | 141551033 | 141551276 | 244  | * | 2 | 2.34156E-09 | 0.050331676 | 0.001514709 | 0.005112037 | -0.094664914 | -0.040512152 |                       |
| chr5  | 75377860  | 75379515  | 1656 | * | 9 | 3.14684E-25 | 6.74587E-07 | 0.001515224 | 4.71056E-06 | -0.037855709 | 0.011777002  | SV2C, CTC-235G5.3     |
| chr7  | 36698354  | 36698863  | 510  | * | 2 | 2.86315E-13 | 1.80469E-05 | 0.001516432 | 4.07458E-05 | -0.202327957 | -0.190940628 | AOAH                  |
| chr1  | 229206074 | 229206273 | 200  | * | 2 | 2.8495E-13  | 1.94974E-05 | 0.001517801 | 4.36137E-05 | -0.219538254 | -0.188690263 |                       |
| chr2  | 46227654  | 46227968  | 315  | * | 3 | 6.16444E-10 | 0.407648509 | 0.00151886  | 0.016555746 | 0.223458381  | 0.076452383  | PRKCE                 |
| chr16 | 89003641  | 89004908  | 1268 | * | 5 | 2.55682E-19 | 0.015188519 | 0.00151942  | 0.001153225 | -0.1402555   | -0.060903066 | CBFA2T3, RP11-830F9.7 |
| chr11 | 62229913  | 62231081  | 1169 | * | 6 | 2.78415E-18 | 0.001058108 | 0.001519813 | 0.000145581 | 0.211895177  | 0.090872044  | AHNAK                 |
| chr20 | 62632981  | 62633123  | 143  | * | 3 | 1.072E-09   | 0.021596831 | 0.001521675 | 0.004752204 | 0.155448202  | 0.060597182  | PRPF6, ZNF512B        |
| chr20 | 30300972  | 30301179  | 208  | * | 2 | 5.00344E-09 | 0.049867854 | 0.001521941 | 0.0051214   | -0.134579146 | -0.06377485  | RP11-243J16.7, BCL2L1 |
| chr11 | 47410526  | 47410707  | 182  | * | 2 | 2.18074E-13 | 4.12251E-05 | 0.001521971 | 8.31108E-05 | -0.223795186 | -0.189041176 | RP11-750H9.5          |
| chr7  | 128083590 | 128083732 | 143  | * | 2 | 3.11033E-09 | 0.076134983 | 0.001522493 | 0.005536694 | -0.10644942  | -0.055741498 |                       |
| chr4  | 6754822   | 6755303   | 482  | * | 4 | 1.81392E-16 | 1.91627E-05 | 0.001525067 | 4.21337E-05 | 0.159738024  | 0.098147576  |                       |
| chr8  | 19555033  | 19555369  | 337  | * | 2 | 4.50871E-10 | 0.072515056 | 0.001528503 | 0.005511522 | -0.187259897 | -0.09910448  | CSGALNACT1            |
| chr5  | 179031306 | 179031448 | 143  | * | 2 | 1.47989E-09 | 0.048581124 | 0.001529398 | 0.005112722 | 0.166931779  | 0.087014199  | RUFY1                 |
| chr8  | 105424058 | 105424730 | 673  | * | 5 | 1.58631E-28 | 5.46501E-10 | 0.00152966  | 7.43823E-09 | -0.241769173 | -0.202500786 | DPYS                  |
| chr17 | 79415682  | 79416550  | 869  | * | 3 | 5.61515E-12 | 0.036783219 | 0.001529854 | 0.005275254 | -0.28277559  | -0.068512573 | RP11-1055B8.7         |
| chr3  | 182977036 | 182977408 | 373  | * | 2 | 2.89189E-12 | 0.000876447 | 0.001530331 | 0.000836862 | -0.359820354 | -0.213715977 | B3GNT5, MCF2L2        |
| chr12 | 10182372  | 10184080  | 1709 | * | 9 | 3.3157E-31  | 4.68779E-05 | 0.001532361 | 2.09021E-06 | -0.223097278 | -0.066482876 | CLEC9A, RP11-133L14.5 |
| chr1  | 158604822 | 158605286 | 465  | * | 2 | 5.70381E-11 | 0.002190108 | 0.00153322  | 0.001466096 | -0.176493616 | -0.099855752 | SPTA1                 |
| chr19 | 16986822  | 16988083  | 1262 | * | 4 | 6.02068E-14 | 0.000113145 | 0.001535605 | 3.25957E-06 | 0.181732468  | 0.099688964  | SIN3B                 |
| chr17 | 74557494  | 74558202  | 709  | * | 4 | 2.63332E-22 | 1.28625E-05 | 0.001536076 | 2.0071E-06  | -0.224193042 | -0.147038299 | SNHG16                |
| chr5  | 137203424 | 137203640 | 217  | * | 2 | 3.68097E-10 | 0.006536198 | 0.001537357 | 0.00258545  | 0.152763085  | 0.090088999  | MYOT, RP11-381K20.2   |
| chr16 | 27654256  | 27654375  | 120  | * | 3 | 1.36794E-14 | 0.000347256 | 0.00153915  | 7.83869E-05 | -0.232633195 | -0.125607119 | KIAA0556              |
| chr11 | 64642144  | 64643272  | 1129 | * | 7 | 9.96673E-33 | 2.12512E-11 | 0.001541736 | 6.20626E-10 | -0.187905651 | -0.051423589 | EHD1                  |
| chr22 | 39895842  | 39896232  | 391  | * | 2 | 1.51696E-11 | 0.029769698 | 0.001542384 | 0.004559899 | 0.206585344  | 0.099961023  | MIEF1                 |

|       |           |           |      |   |    |             |             |             |             |              |              |                  |
|-------|-----------|-----------|------|---|----|-------------|-------------|-------------|-------------|--------------|--------------|------------------|
| chr5  | 1477719   | 1478509   | 791  | * | 3  | 8.03555E-19 | 7.80467E-07 | 0.001542592 | 3.08815E-06 | -0.332422154 | -0.266760891 | LPCAT1           |
| chr7  | 966081    | 967834    | 1754 | * | 11 | 1.68946E-21 | 0.010423899 | 0.001542643 | 0.001659911 | -0.232408513 | -0.038478276 | ADAP1, COX19     |
| chr7  | 141395696 | 141395853 | 158  | * | 2  | 1.64216E-08 | 0.081592149 | 0.0015433   | 0.005658254 | -0.092577347 | -0.044184655 | KIAA1147         |
| chr11 | 57299541  | 57299709  | 169  | * | 2  | 3.31986E-10 | 0.027296771 | 0.001543678 | 0.004451445 | 0.149563688  | 0.067925194  |                  |
| chr1  | 153321198 | 153321421 | 224  | * | 2  | 1.07852E-10 | 0.046116244 | 0.001543929 | 0.005092718 | -0.231815621 | -0.108409325 | PGLYRP4          |
| chr2  | 71779926  | 71780175  | 250  | * | 2  | 4.4443E-09  | 0.037150035 | 0.00154477  | 0.004841086 | -0.193938721 | -0.086166357 | DYSF             |
| chr10 | 101609768 | 101610732 | 965  | * | 3  | 5.10414E-15 | 5.52891E-05 | 0.001546235 | 5.78129E-05 | -0.276865034 | -0.203173636 | ABCC2            |
| chr4  | 39481907  | 39482781  | 875  | * | 8  | 4.01572E-33 | 0.000382592 | 0.001550631 | 1.6843E-06  | -0.339672754 | -0.119871262 | RP11-472B18.1    |
| chr12 | 121419635 | 121419771 | 137  | * | 2  | 6.64574E-12 | 0.00019575  | 0.001558122 | 0.000292285 | 0.194045444  | 0.162773957  | HNF1A            |
| chr5  | 66253919  | 66255772  | 1854 | * | 10 | 4.3643E-34  | 1.7359E-07  | 0.001559413 | 1.01962E-07 | -0.386192898 | -0.079054207 | MAST4            |
| chr7  | 150146890 | 150148073 | 1184 | * | 11 | 5.56682E-19 | 0.579409968 | 0.001560085 | 0.061515711 | -0.113777365 | -0.013620098 | GIMAP8           |
| chr14 | 99501573  | 99502466  | 894  | * | 3  | 1.35035E-16 | 7.93433E-06 | 0.001561027 | 1.806E-05   | -0.248853414 | -0.161864008 |                  |
| chr10 | 1088372   | 1088692   | 321  | * | 4  | 1.66526E-20 | 2.34218E-06 | 0.00156257  | 2.33123E-06 | -0.294808353 | -0.212305011 | IDI2-AS1, IDI1   |
| chr21 | 43316274  | 43316705  | 432  | * | 3  | 1.21791E-19 | 2.73244E-06 | 0.001565965 | 7.60897E-06 | -0.221963029 | -0.17896118  | C2CD2            |
| chr6  | 30704809  | 30704998  | 190  | * | 3  | 6.02045E-10 | 0.1069876   | 0.001567515 | 0.011471219 | 0.132670574  | 0.066750336  | FLOT1            |
| chr5  | 94027110  | 94027888  | 779  | * | 4  | 1.62262E-19 | 2.67619E-06 | 0.00156774  | 5.10135E-06 | -0.290742167 | -0.187676119 | ANKRD32          |
| chr3  | 172041893 | 172042282 | 390  | * | 2  | 4.08404E-11 | 0.001048225 | 0.00156866  | 0.000949751 | -0.250257547 | -0.14959362  | FNDC3B           |
| chr15 | 86315115  | 86315211  | 97   | * | 3  | 1.76342E-18 | 1.23101E-06 | 0.001569852 | 4.82752E-06 | -0.235600679 | -0.172510781 | KLHL25           |
| chr1  | 26490540  | 26490628  | 89   | * | 2  | 2.01769E-09 | 0.043260115 | 0.001571242 | 0.005088768 | 0.110685661  | 0.067799164  |                  |
| chr10 | 75654257  | 75654563  | 307  | * | 2  | 7.68963E-11 | 0.000372189 | 0.00157414  | 0.000471351 | 0.188761999  | 0.139193205  |                  |
| chr1  | 9714280   | 9714845   | 566  | * | 7  | 1.92763E-27 | 3.70127E-06 | 0.001577394 | 8.7557E-07  | -0.290691568 | -0.120118676 | PIK3CD, C1orf200 |
| chr9  | 21032451  | 21032989  | 539  | * | 2  | 1.53517E-14 | 1.92607E-05 | 0.001579044 | 4.34355E-05 | 0.147283486  | 0.144301328  |                  |
| chr6  | 6885899   | 6886806   | 908  | * | 3  | 6.8978E-14  | 7.80671E-05 | 0.00157932  | 9.84264E-05 | -0.309792608 | -0.180104576 |                  |
| chr2  | 144019668 | 144020044 | 377  | * | 2  | 1.09843E-09 | 0.017828198 | 0.001580181 | 0.003953395 | -0.285912351 | -0.133132045 | ARHGAP15         |
| chr18 | 61557687  | 61557735  | 49   | * | 2  | 5.54942E-14 | 2.24293E-05 | 0.001583743 | 4.96615E-05 | -0.290112525 | -0.235450734 | SERPINB2         |
| chr7  | 99970448  | 99972461  | 2014 | * | 8  | 5.57774E-29 | 7.58653E-09 | 0.001585655 | 2.44558E-09 | -0.292020401 | -0.111570993 | PILRA            |
| chr12 | 58210661  | 58211237  | 577  | * | 5  | 2.64621E-15 | 0.047902328 | 0.001586618 | 0.002804933 | -0.236634807 | -0.061333766 | AVIL             |
| chr11 | 65059447  | 65060386  | 940  | * | 3  | 1.69756E-15 | 0.000560923 | 0.001587348 | 0.000108492 | -0.260463322 | -0.124765889 | POLA2            |
| chr15 | 39727283  | 39727923  | 641  | * | 3  | 5.79769E-16 | 0.000266842 | 0.001590277 | 0.000157072 | 0.215437836  | 0.127441385  |                  |



|       |           |           |      |   |    |             |             |             |             |              |              |                           |
|-------|-----------|-----------|------|---|----|-------------|-------------|-------------|-------------|--------------|--------------|---------------------------|
| chr2  | 232880298 | 232880480 | 183  | * | 2  | 3.26669E-10 | 0.013737313 | 0.001592318 | 0.003616133 | -0.165018275 | -0.086847186 | DIS3L2, AC105461.1        |
| chr21 | 43652704  | 43653234  | 531  | * | 2  | 9.39954E-13 | 1.53509E-05 | 0.001593176 | 3.55928E-05 | -0.280771284 | -0.233085994 | ABCG1                     |
| chr1  | 53856140  | 53856531  | 392  | * | 2  | 1.36288E-09 | 0.009408064 | 0.001596263 | 0.003111598 | -0.1049518   | -0.057874758 |                           |
| chr2  | 20306539  | 20306827  | 289  | * | 2  | 3.41282E-13 | 3.78385E-05 | 0.001596563 | 7.80746E-05 | 0.160477531  | 0.150716726  | AC098828.2                |
| chr13 | 43354421  | 43354782  | 362  | * | 4  | 1.35589E-18 | 2.37575E-05 | 0.001597232 | 2.80735E-05 | -0.326061159 | -0.190794268 |                           |
| chr18 | 46333108  | 46333236  | 129  | * | 2  | 2.41979E-08 | 0.139956859 | 0.001601898 | 0.006218948 | 0.154076934  | 0.076475916  | CTIF                      |
| chr3  | 64177129  | 64177237  | 109  | * | 2  | 4.3166E-09  | 0.003565516 | 0.001603425 | 0.001964267 | -0.225639834 | -0.121009514 | PRICKLE2-AS3, PRICKLE2    |
| chr13 | 114783597 | 114783665 | 69   | * | 2  | 1.36897E-10 | 0.00140265  | 0.001604634 | 0.001152119 | 0.169179308  | 0.115428587  | RASA3                     |
| chr10 | 97514686  | 97515753  | 1068 | * | 7  | 7.35401E-31 | 0.000166973 | 0.001604906 | 8.85247E-07 | -0.319191425 | -0.155255932 | ENTPD1, ENTPD1-AS1        |
| chr16 | 73071300  | 73072333  | 1034 | * | 3  | 1.13387E-13 | 0.000301469 | 0.001605695 | 0.000395226 | 0.215382957  | 0.12072987   | ZFH3                      |
| chr7  | 6631231   | 6631520   | 290  | * | 4  | 1.27638E-14 | 0.027076517 | 0.001605913 | 0.000807143 | -0.37847144  | -0.129336168 | C7orf26                   |
| chr1  | 27634683  | 27634872  | 190  | * | 3  | 2.05426E-09 | 0.080412989 | 0.001606221 | 0.008005682 | -0.063645286 | -0.023404921 | WDTC1                     |
| chr2  | 64559272  | 64559457  | 186  | * | 2  | 2.22349E-09 | 0.045924461 | 0.001606774 | 0.005249825 | 0.166457458  | 0.073311179  |                           |
| chr16 | 14051717  | 14051856  | 140  | * | 2  | 6.62963E-09 | 0.019918149 | 0.001609751 | 0.004160019 | -0.170995645 | -0.096115304 |                           |
| chr17 | 4387045   | 4387100   | 56   | * | 2  | 3.40175E-10 | 0.00381796  | 0.001609792 | 0.002040671 | -0.227309538 | -0.13730852  | SPNS3, RP13-580F15.2      |
| chr19 | 13053719  | 13054718  | 1000 | * | 5  | 3.91012E-28 | 6.43057E-09 | 0.001611779 | 2.67247E-08 | -0.365484674 | -0.221042927 | CALR                      |
| chr17 | 8629735   | 8629854   | 120  | * | 2  | 2.12057E-08 | 0.041991234 | 0.001612934 | 0.00515745  | -0.246065607 | -0.131254217 |                           |
| chr2  | 231662312 | 231662582 | 271  | * | 2  | 1.08449E-10 | 0.001102629 | 0.001613047 | 0.000993678 | -0.197370434 | -0.127687238 | CAB39                     |
| chr6  | 31656126  | 31658789  | 2664 | * | 9  | 8.98957E-23 | 0.000556865 | 0.00161548  | 8.77143E-06 | 0.214666697  | 0.07764464   | ABHD16A, XXbac-BPG32J3.20 |
| chr10 | 90638291  | 90638765  | 475  | * | 2  | 7.1244E-11  | 0.050493799 | 0.001616044 | 0.005384625 | -0.325632472 | -0.165603339 |                           |
| chr5  | 173285610 | 173286145 | 536  | * | 3  | 1.01179E-15 | 3.51324E-06 | 0.001616784 | 1.16106E-05 | -0.331648006 | -0.143859083 |                           |
| chr1  | 247581408 | 247582066 | 659  | * | 7  | 3.78749E-30 | 0.002318721 | 0.001618508 | 7.55353E-06 | -0.350039458 | -0.105616661 | NLRP3                     |
| chr15 | 40632399  | 40633816  | 1418 | * | 11 | 1.31839E-32 | 0.000100384 | 0.001619959 | 3.03263E-06 | -0.229184495 | -0.058497236 | C15orf52                  |
| chr17 | 40838861  | 40839022  | 162  | * | 3  | 2.64396E-11 | 0.016710566 | 0.001621336 | 0.00413096  | 0.073335224  | 0.037435181  | CNTNAP1, CTD-3193K9.3     |
| chr9  | 2044055   | 2044541   | 487  | * | 2  | 6.92647E-11 | 0.001197777 | 0.001621861 | 0.001049752 | 0.087453732  | 0.057299496  | SMARCA2, RP11-264I13.2    |
| chr10 | 134504552 | 134504666 | 115  | * | 2  | 3.93457E-09 | 0.068256732 | 0.00162205  | 0.005725715 | 0.130056238  | 0.070764015  | INPP5A                    |
| chr4  | 157713603 | 157713817 | 215  | * | 2  | 1.09944E-09 | 0.01551521  | 0.001622993 | 0.003834033 | 0.221751961  | 0.085046097  | PDGFC                     |
| chr5  | 148442740 | 148444109 | 1370 | * | 7  | 1.89222E-16 | 5.58315E-05 | 0.001623263 | 3.74281E-05 | 0.211934209  | 0.097959458  | CTC-529P8.1               |
| chr12 | 8210810   | 8211391   | 582  | * | 4  | 1.94328E-20 | 8.98849E-08 | 0.001623484 | 5.62078E-07 | -0.302527304 | -0.230774106 | C3AR1                     |

|       |           |           |      |   |    |             |             |             |             |              |              |                           |
|-------|-----------|-----------|------|---|----|-------------|-------------|-------------|-------------|--------------|--------------|---------------------------|
| chr7  | 16461579  | 16461798  | 220  | * | 2  | 5.44985E-11 | 0.040847497 | 0.001623685 | 0.005149896 | -0.13741113  | -0.061496431 |                           |
| chr13 | 29291375  | 29291701  | 327  | * | 2  | 5.34524E-11 | 0.180850911 | 0.001624715 | 0.00641582  | -0.184213332 | -0.093498715 | SLC46A3                   |
| chr7  | 5447079   | 5447353   | 275  | * | 2  | 5.93565E-09 | 0.338519774 | 0.001627378 | 0.006576777 | -0.290699301 | -0.144883291 | TNRC18                    |
| chr12 | 96633384  | 96633723  | 340  | * | 2  | 9.94726E-11 | 0.003705517 | 0.00162853  | 0.002022373 | 0.18822697   | 0.087106377  | ELK3                      |
| chr16 | 69776039  | 69776499  | 461  | * | 2  | 1.14504E-12 | 0.000477541 | 0.001631412 | 0.000570326 | -0.147273335 | -0.083334121 | CTD-2033A16.3, NOB1       |
| chr12 | 52603300  | 52605004  | 1705 | * | 6  | 2.61331E-17 | 0.004146307 | 0.001637971 | 0.000415734 | -0.249493309 | -0.047501338 | LINC00592, C12orf80       |
| chr15 | 40398307  | 40399723  | 1417 | * | 10 | 7.56056E-31 | 0.001475142 | 0.001638363 | 1.18382E-05 | -0.192475543 | -0.064331757 | BMF                       |
| chr16 | 84390897  | 84391112  | 216  | * | 2  | 6.86216E-12 | 7.18369E-05 | 0.00163954  | 0.00013425  | -0.117381812 | -0.077741947 |                           |
| chr9  | 271757    | 273074    | 1318 | * | 7  | 2.39251E-23 | 0.011475921 | 0.001640253 | 0.000315511 | -0.22789251  | -0.069210836 | DOCK8, RP11-59O6.3        |
| chr3  | 178815437 | 178815496 | 60   | * | 2  | 7.21006E-12 | 0.000577026 | 0.001640313 | 0.000651916 | -0.22934996  | -0.177341441 |                           |
| chr16 | 84676858  | 84677351  | 494  | * | 2  | 4.2074E-12  | 7.21717E-05 | 0.001640992 | 0.000134792 | -0.371430442 | -0.136948828 |                           |
| chr6  | 43274373  | 43275674  | 1302 | * | 4  | 2.00683E-11 | 0.009927854 | 0.001641284 | 0.000899908 | 0.2353537    | 0.035257173  | CRIP3, ZNF318             |
| chr12 | 25706982  | 25707667  | 686  | * | 4  | 2.6487E-17  | 0.000375664 | 0.001645804 | 2.6571E-05  | -0.251756672 | -0.135142165 | IFLTD1                    |
| chr21 | 43983837  | 43983971  | 135  | * | 2  | 1.76757E-08 | 0.046869811 | 0.001646252 | 0.005375268 | -0.16342042  | -0.076503507 | SLC37A1                   |
| chr12 | 53267981  | 53268997  | 1017 | * | 5  | 1.25471E-12 | 0.04320711  | 0.00165017  | 0.010572443 | -0.06385471  | -0.018325213 |                           |
| chr19 | 50335849  | 50336107  | 259  | * | 2  | 1.21734E-10 | 0.006697304 | 0.001650407 | 0.002733234 | -0.188461834 | -0.107312086 | MED25                     |
| chr12 | 107300707 | 107300784 | 78   | * | 2  | 2.32056E-10 | 0.000457219 | 0.001652935 | 0.00055599  | -0.119291505 | -0.08960128  |                           |
| chr17 | 42871894  | 42872309  | 416  | * | 2  | 2.34923E-11 | 0.001350805 | 0.001652974 | 0.001141967 | 0.184923886  | 0.075344008  | CTC-296K1.4               |
| chr6  | 105725878 | 105726842 | 965  | * | 4  | 1.56162E-14 | 0.000192662 | 0.00165454  | 0.000259669 | 0.15299021   | 0.065898246  | PREP                      |
| chr9  | 19925171  | 19925583  | 413  | * | 2  | 2.38494E-11 | 0.000831183 | 0.001658692 | 0.000837882 | 0.101853141  | 0.006906008  |                           |
| chr7  | 106061801 | 106062067 | 267  | * | 2  | 1.18764E-08 | 0.221681234 | 0.001659181 | 0.006604269 | -0.249332702 | -0.125475289 | CTB-111H14.1              |
| chr1  | 36983119  | 36983235  | 117  | * | 2  | 4.37069E-12 | 0.000351191 | 0.001659658 | 0.000461046 | 0.101842666  | 0.087879105  |                           |
| chr7  | 2078036   | 2078988   | 953  | * | 4  | 3.2778E-11  | 0.312992875 | 0.001660126 | 0.029087598 | 0.156748642  | 0.044108311  | MAD1L1                    |
| chr11 | 112037134 | 112038104 | 971  | * | 9  | 4.82885E-19 | 0.025777809 | 0.001662802 | 0.008002993 | -0.170185039 | -0.040583753 | SDHD, TEX12, RP11-356J5.4 |
| chr12 | 6332834   | 6335277   | 2444 | * | 8  | 2.89674E-17 | 6.49779E-06 | 0.001664684 | 2.81275E-07 | 0.226654787  | 0.089794435  | CD9                       |
| chr11 | 45257323  | 45257480  | 158  | * | 2  | 7.03716E-09 | 0.016801121 | 0.001665477 | 0.004018052 | -0.122322903 | -0.04501375  |                           |
| chr10 | 73612154  | 73612360  | 207  | * | 2  | 9.33865E-11 | 0.05435398  | 0.00166595  | 0.005601812 | -0.292341349 | -0.148642802 |                           |
| chr19 | 1513513   | 1514425   | 913  | * | 4  | 6.95214E-17 | 0.005013087 | 0.001666279 | 0.000792827 | 0.091869193  | 0.051063955  | ADAMTSL5                  |
| chr3  | 120401058 | 120402723 | 1666 | * | 7  | 1.46189E-19 | 0.002523991 | 0.001666921 | 5.41091E-06 | 0.239492478  | 0.014778371  | HGD                       |

|       |           |           |      |   |    |             |             |             |             |              |              |                         |
|-------|-----------|-----------|------|---|----|-------------|-------------|-------------|-------------|--------------|--------------|-------------------------|
| chr4  | 119991548 | 119991634 | 87   | * | 2  | 8.76327E-11 | 0.000422811 | 0.001667021 | 0.000527712 | -0.262558349 | -0.1689951   |                         |
| chr11 | 69414593  | 69414923  | 331  | * | 2  | 2.38461E-11 | 0.000242427 | 0.001672572 | 0.000351682 | -0.304848723 | -0.096093277 |                         |
| chr12 | 77426239  | 77426479  | 241  | * | 2  | 6.49134E-13 | 2.43843E-05 | 0.001672827 | 5.39323E-05 | -0.249556524 | -0.249223302 | E2F7                    |
| chr5  | 115962086 | 115962584 | 499  | * | 3  | 1.99748E-11 | 0.001108164 | 0.001673113 | 0.000986986 | -0.264629029 | -0.130382769 |                         |
| chr3  | 64083605  | 64083787  | 183  | * | 2  | 9.95574E-14 | 9.44601E-05 | 0.00167409  | 0.000168674 | 0.218413703  | 0.169231758  | RP11-129B22.1, PRICKLE2 |
| chr17 | 57444078  | 57444356  | 279  | * | 2  | 3.66785E-10 | 0.284823585 | 0.001677507 | 0.006727466 | 0.151830497  | 0.0766632    | YPEL2                   |
| chr1  | 9129487   | 9130738   | 1252 | * | 6  | 2.72554E-31 | 1.83098E-06 | 0.001678763 | 1.18895E-07 | -0.24658853  | -0.125435351 | SLC2A5                  |
| chr11 | 47736132  | 47737105  | 974  | * | 10 | 4.97603E-15 | 0.676884871 | 0.001681988 | 0.025757993 | -0.129630245 | -0.0239916   | AGBL2                   |
| chr13 | 114802548 | 114803271 | 724  | * | 5  | 1.95388E-13 | 0.019043334 | 0.001682398 | 0.004583025 | 0.165335737  | 0.052351472  | RASA3                   |
| chr19 | 51981608  | 51981718  | 111  | * | 2  | 2.63876E-11 | 0.00371333  | 0.001684282 | 0.002063879 | 0.19907742   | 0.115087696  | CEACAM18                |
| chr15 | 73074167  | 73075587  | 1421 | * | 8  | 1.911E-17   | 0.00035294  | 0.001686685 | 0.000201613 | -0.238112759 | -0.025247088 | ADPGK-AS1, ADPGK        |
| chr15 | 85358533  | 85359250  | 718  | * | 4  | 2.43492E-14 | 0.003919376 | 0.001687012 | 0.000884608 | -0.235223355 | -0.113506992 |                         |
| chr10 | 94448532  | 94448702  | 171  | * | 2  | 8.92688E-09 | 0.03754101  | 0.001688658 | 0.00519761  | -0.287270773 | -0.136855273 | HHEX                    |
| chr12 | 29376421  | 29376872  | 452  | * | 4  | 3.66599E-20 | 4.16837E-06 | 0.001689272 | 2.47741E-06 | -0.229493682 | -0.142459546 | FAR2                    |
| chr7  | 24324976  | 24325371  | 396  | * | 4  | 2.41453E-10 | 0.094842559 | 0.001689727 | 0.015740437 | 0.069288127  | 0.02023605   | NPY                     |
| chr7  | 23489752  | 23489930  | 179  | * | 2  | 5.9472E-09  | 0.014554208 | 0.001690173 | 0.003850769 | -0.242224301 | -0.096171551 | IGF2BP3                 |
| chr10 | 82036111  | 82036320  | 210  | * | 2  | 5.67395E-09 | 0.007810158 | 0.001690904 | 0.002977241 | 0.196205209  | 0.093836383  | MAT1A                   |
| chr8  | 1940413   | 1940523   | 111  | * | 2  | 3.75307E-12 | 4.7385E-05  | 0.001693539 | 9.56556E-05 | -0.172841536 | -0.128168792 | KBTBD11                 |
| chr20 | 1842141   | 1842208   | 68   | * | 2  | 1.38989E-12 | 3.02773E-05 | 0.001693783 | 6.52383E-05 | -0.212875106 | -0.131687575 |                         |
| chr17 | 55122538  | 55122747  | 210  | * | 2  | 7.75938E-09 | 0.077324995 | 0.001694137 | 0.006057314 | -0.281068433 | -0.134540688 |                         |
| chr10 | 103698992 | 103699807 | 816  | * | 3  | 1.30385E-16 | 0.002674357 | 0.001695229 | 0.000133761 | 0.182438269  | 0.112831099  | C10orf76                |
| chr2  | 100135414 | 100135460 | 47   | * | 2  | 1.91459E-12 | 3.40653E-05 | 0.001695982 | 7.22342E-05 | -0.360866757 | -0.259962184 |                         |
| chr7  | 127720696 | 127720983 | 288  | * | 2  | 1.72644E-09 | 0.032926169 | 0.001699214 | 0.005044066 | 0.186741736  | 0.08900077   | SND1                    |
| chr18 | 59768649  | 59769538  | 890  | * | 2  | 1.69539E-10 | 3.65365E-05 | 0.001699266 | 7.67365E-05 | -0.254145707 | -0.249010312 | PIGN                    |
| chr22 | 50499398  | 50499580  | 183  | * | 2  | 7.57609E-11 | 0.000302154 | 0.001699775 | 0.000416613 | -0.19943186  | -0.181017243 | MLC1                    |
| chr1  | 219047954 | 219048260 | 307  | * | 2  | 9.21908E-11 | 0.000334112 | 0.001703197 | 0.00044884  | -0.325390076 | -0.200570252 |                         |
| chr20 | 31123895  | 31123990  | 96   | * | 2  | 1.13791E-09 | 0.014025724 | 0.001704756 | 0.003819559 | 0.114478603  | 0.051607478  | C20orf112               |
| chr7  | 140732689 | 140732738 | 50   | * | 2  | 4.27747E-11 | 0.000133997 | 0.001710441 | 0.000224323 | -0.035025737 | -0.030368154 |                         |
| chr16 | 3188215   | 3189015   | 801  | * | 5  | 3.67627E-19 | 0.000316602 | 0.001713386 | 7.37522E-05 | 0.230902705  | 0.084627483  | ZNF213                  |

|       |           |           |      |   |   |             |             |             |             |              |              |                             |
|-------|-----------|-----------|------|---|---|-------------|-------------|-------------|-------------|--------------|--------------|-----------------------------|
| chr11 | 73681281  | 73681337  | 57   | * | 2 | 1.74795E-13 | 2.47697E-05 | 0.001715143 | 5.49138E-05 | 0.148169196  | 0.110443021  | DNAJB13, RP11-167N4.2       |
| chr14 | 101308921 | 101309386 | 466  | * | 3 | 2.22887E-14 | 8.20894E-05 | 0.001719234 | 0.000113886 | -0.219898071 | -0.119591519 | MEG3, RP11-123M6.2          |
| chr2  | 135149599 | 135150189 | 591  | * | 3 | 3.26411E-16 | 1.04506E-05 | 0.001721917 | 2.12881E-05 | -0.246857506 | -0.15178683  | MGAT5                       |
| chr8  | 145064570 | 145064874 | 305  | * | 3 | 2.94439E-10 | 0.204171163 | 0.001723842 | 0.013637088 | -0.065310365 | -0.021251775 | GRINA, PARP10               |
| chr8  | 20060877  | 20061561  | 685  | * | 3 | 3.78715E-15 | 0.002840552 | 0.001724508 | 0.000187393 | -0.370828347 | -0.223451533 | ATP6V1B2                    |
| chr2  | 85955624  | 85957232  | 1609 | * | 5 | 1.88334E-15 | 2.00184E-05 | 0.001724608 | 2.00237E-06 | -0.260321236 | -0.108727655 |                             |
| chr17 | 29379458  | 29379641  | 184  | * | 2 | 8.56684E-09 | 0.026018897 | 0.001725006 | 0.004764804 | 0.185421067  | 0.089770168  | RP11-848P1.9, RP11-271K11.5 |
| chr1  | 115293662 | 115294759 | 1098 | * | 3 | 7.18361E-11 | 9.43096E-05 | 0.001725318 | 8.72749E-05 | -0.332882251 | -0.099440871 | CSDE1                       |
| chr22 | 32873526  | 32873961  | 436  | * | 4 | 9.06358E-16 | 4.2137E-05  | 0.00172598  | 4.52142E-05 | 0.152809906  | 0.080581801  | FBXO7                       |
| chr15 | 63623836  | 63624154  | 319  | * | 3 | 5.44003E-11 | 0.0875681   | 0.001726973 | 0.011060631 | 0.194429367  | 0.07782652   | CA12                        |
| chr8  | 142222147 | 142223071 | 925  | * | 5 | 1.9305E-13  | 0.152230251 | 0.001727146 | 0.012144468 | -0.268360512 | -0.068869048 | SLC45A4                     |
| chr2  | 69026797  | 69027039  | 243  | * | 2 | 1.66364E-09 | 0.002039484 | 0.001727782 | 0.001497465 | 0.152401979  | 0.088794176  | ARHGAP25                    |
| chr17 | 35870381  | 35870940  | 560  | * | 5 | 2.26144E-17 | 0.005716256 | 0.001728428 | 0.000412925 | 0.132189235  | 0.059277256  | DUSP14                      |
| chr12 | 110815848 | 110816408 | 561  | * | 2 | 3.07238E-13 | 0.018667651 | 0.001728535 | 0.004281007 | -0.291446933 | -0.149001491 | ANAPC7                      |
| chr3  | 186646931 | 186647026 | 96   | * | 4 | 1.43045E-21 | 0.000160487 | 0.00172976  | 3.43738E-06 | 0.189667767  | 0.138196372  |                             |
| chr11 | 19265869  | 19265989  | 121  | * | 2 | 2.82102E-10 | 0.000575389 | 0.001731732 | 0.00066519  | -0.220876609 | -0.140073572 | RP11-428C19.4               |
| chr22 | 23478054  | 23478672  | 619  | * | 4 | 2.37192E-20 | 1.45473E-05 | 0.001735263 | 6.95703E-06 | 0.198565578  | 0.121406776  | RTDR1                       |
| chr6  | 109777642 | 109778682 | 1041 | * | 5 | 1.95046E-20 | 0.000209986 | 0.001736087 | 3.16485E-05 | 0.148967341  | 0.074762054  | MICAL1                      |
| chr8  | 117664615 | 117664855 | 241  | * | 2 | 1.58594E-08 | 0.047687261 | 0.001737024 | 0.00562795  | -0.15671568  | -0.082430665 | EIF3H                       |
| chr2  | 55320612  | 55320703  | 92   | * | 2 | 2.02587E-12 | 3.42828E-05 | 0.001738577 | 7.29788E-05 | -0.325064155 | -0.265689604 | RTN4                        |
| chr5  | 96293389  | 96294344  | 956  | * | 4 | 2.64849E-20 | 7.43032E-06 | 0.001739538 | 4.28148E-06 | -0.293332457 | -0.138366402 | LNPEP                       |
| chr1  | 229194510 | 229195169 | 660  | * | 2 | 9.20112E-12 | 4.01698E-05 | 0.001742775 | 8.3638E-05  | -0.119391005 | -0.11023109  |                             |
| chr14 | 24032626  | 24033309  | 684  | * | 4 | 4.47851E-13 | 0.011994667 | 0.001742843 | 0.002089369 | -0.272817662 | -0.080874583 | RP11-66N24.3, AP1G2         |
| chr4  | 83803228  | 83804018  | 791  | * | 4 | 4.40465E-10 | 0.344341182 | 0.001742891 | 0.030693949 | -0.157253617 | -0.035310681 | SEC31A                      |
| chr6  | 13462275  | 13462406  | 132  | * | 2 | 1.48185E-12 | 8.77431E-05 | 0.001746378 | 0.000160636 | -0.265486918 | -0.235101406 | GFOD1                       |
| chr14 | 75282966  | 75283416  | 451  | * | 2 | 4.05634E-10 | 0.005774386 | 0.001748445 | 0.00263917  | -0.280708379 | -0.149998682 | YLPM1                       |
| chr20 | 49232141  | 49232374  | 234  | * | 2 | 5.50268E-09 | 0.006004489 | 0.001748543 | 0.002689608 | 0.124641673  | 0.070736871  | FAM65C                      |
| chr6  | 36734511  | 36734921  | 411  | * | 3 | 2.68933E-12 | 0.004239166 | 0.001748707 | 0.000838959 | -0.184906464 | -0.103356107 | CPNE5                       |
| chr7  | 2486036   | 2486525   | 490  | * | 3 | 6.77137E-12 | 0.005281741 | 0.001749684 | 0.001254778 | 0.130108183  | 0.065830634  | AC004840.9                  |

|       |           |           |      |   |   |             |             |             |             |              |              |                                        |
|-------|-----------|-----------|------|---|---|-------------|-------------|-------------|-------------|--------------|--------------|----------------------------------------|
| chr2  | 241585833 | 241585888 | 56   | * | 3 | 4.55873E-09 | 0.147839564 | 0.001750515 | 0.013884942 | -0.12783921  | -0.026127017 |                                        |
| chr2  | 225434838 | 225435435 | 598  | * | 4 | 2.37513E-16 | 0.000451195 | 0.001750683 | 0.000103412 | -0.295857781 | -0.118072153 | CUL3                                   |
| chr5  | 90478716  | 90479831  | 1116 | * | 3 | 8.46169E-10 | 0.000141662 | 0.001751281 | 6.95706E-05 | -0.266987775 | -0.155794192 |                                        |
| chr2  | 169927922 | 169928251 | 330  | * | 3 | 7.95851E-12 | 0.005185486 | 0.001752742 | 0.001360991 | -0.192713987 | -0.108572233 | DHRS9                                  |
| chr5  | 172331733 | 172332685 | 953  | * | 7 | 2.54049E-18 | 0.144164376 | 0.001753288 | 0.002806155 | -0.182549934 | -0.037675901 | ERGIC1                                 |
| chr9  | 100292179 | 100292291 | 113  | * | 2 | 4.10184E-08 | 0.220143075 | 0.001754432 | 0.006928481 | 0.172867889  | 0.088994129  | TMOD1                                  |
| chr14 | 94856217  | 94858066  | 1850 | * | 8 | 6.39998E-35 | 2.70393E-06 | 0.001754489 | 7.3156E-08  | -0.250213665 | -0.107122914 | SERPINA1                               |
| chr3  | 177209040 | 177209049 | 10   | * | 2 | 4.20892E-13 | 1.85256E-05 | 0.001758355 | 4.26946E-05 | 0.206144375  | 0.171138101  | LINC00578                              |
| chr21 | 45939800  | 45940127  | 328  | * | 2 | 1.22881E-09 | 0.003752388 | 0.001761377 | 0.002128759 | 0.163107274  | 0.074393926  | C21orf90, TSPEAR                       |
| chr2  | 230745792 | 230745848 | 57   | * | 2 | 1.89546E-10 | 0.019900799 | 0.00176147  | 0.004435546 | -0.133324323 | -0.072600164 | TRIP12                                 |
| chr1  | 28422834  | 28423646  | 813  | * | 6 | 2.80841E-15 | 0.018293201 | 0.001762333 | 0.000789121 | -0.195900994 | 0.003973251  | SPCS2P4                                |
| chr2  | 38150028  | 38150157  | 130  | * | 2 | 1.08869E-08 | 0.010077501 | 0.001762682 | 0.003418378 | 0.230400522  | 0.133844602  |                                        |
| chr2  | 120974080 | 120974289 | 210  | * | 4 | 9.15991E-11 | 0.329502874 | 0.001763391 | 0.013561121 | 0.155079217  | 0.055710429  | MTND5P28, AC012363.4                   |
| chr9  | 132346133 | 132346274 | 142  | * | 2 | 4.22849E-09 | 0.011092685 | 0.001764035 | 0.003560343 | -0.219153621 | -0.113621612 | RP11-492E3.2                           |
| chr11 | 503270    | 504301    | 1032 | * | 7 | 5.64907E-38 | 6.47834E-09 | 0.00176418  | 6.49968E-10 | -0.300987969 | -0.156792008 | RNH1                                   |
| chr12 | 13214320  | 13215070  | 751  | * | 5 | 6.73555E-14 | 0.482918869 | 0.001764687 | 0.014983508 | 0.155652465  | 0.039378351  | KIAA1467                               |
| chr3  | 42894502  | 42895364  | 863  | * | 2 | 3.61442E-11 | 6.04591E-05 | 0.001765252 | 0.000118452 | 0.212224352  | 0.174228734  | ACKR2, RP11-141M3.5, KRBOX1,<br>KRBOX1 |
| chr21 | 43965974  | 43965993  | 20   | * | 2 | 2.97671E-09 | 0.049902042 | 0.00176709  | 0.005762421 | 0.143787352  | 0.068756128  | SLC37A1                                |
| chr16 | 79454227  | 79454280  | 54   | * | 2 | 2.46217E-08 | 0.149392889 | 0.00176743  | 0.006798975 | 0.035595754  | 0.017553754  |                                        |
| chr21 | 42795929  | 42796537  | 609  | * | 2 | 6.48379E-11 | 0.098178338 | 0.001768071 | 0.006498456 | 0.19352054   | 0.098931923  | MX1                                    |
| chr22 | 51109146  | 51109466  | 321  | * | 2 | 2.47718E-09 | 0.007192666 | 0.001768857 | 0.002949897 | 0.144998796  | 0.086573922  |                                        |
| chr19 | 2091161   | 2091406   | 246  | * | 2 | 8.02087E-09 | 0.009933838 | 0.001772615 | 0.003410052 | -0.115336183 | -0.069194996 | MOB3A                                  |
| chr16 | 72822033  | 72822362  | 330  | * | 2 | 8.09208E-11 | 0.064481825 | 0.001774364 | 0.006092512 | -0.27321346  | -0.127107512 | ZFH3                                   |
| chr8  | 142244625 | 142245835 | 1211 | * | 4 | 4.77545E-15 | 2.42143E-06 | 0.001776505 | 5.85691E-06 | -0.296616757 | -0.142536843 | SLC45A4                                |
| chr19 | 41254683  | 41255444  | 762  | * | 3 | 3.40549E-14 | 0.018219993 | 0.001777309 | 0.000957072 | -0.252544371 | -0.040686011 | C19orf54                               |
| chr3  | 186083375 | 186083922 | 548  | * | 2 | 1.83207E-11 | 0.000147528 | 0.001777473 | 0.000244705 | -0.177468805 | -0.052249051 |                                        |
| chr17 | 8323278   | 8323910   | 633  | * | 3 | 9.19822E-10 | 0.076419689 | 0.001780367 | 0.009601816 | -0.229834383 | -0.063637936 | NDEL1                                  |
| chr2  | 242702120 | 242703672 | 1553 | * | 6 | 2.62162E-18 | 4.47397E-05 | 0.001781661 | 1.16236E-05 | -0.36059273  | -0.112696691 | D2HGDH                                 |
| chr7  | 151169166 | 151170083 | 918  | * | 3 | 4.52701E-16 | 1.20705E-05 | 0.001782874 | 2.48004E-05 | -0.177735987 | -0.035015798 | RHEB                                   |

|       |           |           |      |   |    |             |             |             |             |              |              |                                        |
|-------|-----------|-----------|------|---|----|-------------|-------------|-------------|-------------|--------------|--------------|----------------------------------------|
| chr6  | 32904074  | 32905320  | 1247 | * | 12 | 5.79979E-43 | 9.7184E-12  | 0.001783707 | 2.2503E-12  | -0.372907524 | -0.173930458 | HLA-DMB, AL645941.1, XXbac-BPG181M17.5 |
| chr1  | 94198190  | 94198243  | 54   | * | 2  | 9.3758E-09  | 0.016517383 | 0.00178511  | 0.004191663 | 0.139967686  | 0.053543381  | BCAR3                                  |
| chr5  | 149568693 | 149569501 | 809  | * | 3  | 7.86108E-12 | 0.01378194  | 0.001785924 | 0.004646121 | 0.108038895  | 0.043508455  |                                        |
| chr7  | 97755534  | 97755792  | 259  | * | 6  | 6.28206E-31 | 8.19827E-11 | 0.001787728 | 1.57625E-09 | -0.328736903 | -0.215725856 | LMTK2                                  |
| chr10 | 102107266 | 102107584 | 319  | * | 2  | 7.54951E-11 | 0.080144471 | 0.001787964 | 0.006366334 | 0.016922737  | 0.011950184  | SCD                                    |
| chr6  | 14232235  | 14232335  | 101  | * | 2  | 3.30214E-08 | 0.0058693   | 0.001789659 | 0.002697912 | 0.075728708  | 0.032526311  |                                        |
| chr14 | 45744024  | 45744380  | 357  | * | 3  | 4.93781E-10 | 0.006216287 | 0.00179264  | 0.002938642 | -0.110084599 | -0.053203906 |                                        |
| chr12 | 132180381 | 132180564 | 184  | * | 2  | 7.93084E-09 | 0.005530985 | 0.001794396 | 0.002624837 | -0.149607004 | -0.055535901 |                                        |
| chr5  | 99381840  | 99382144  | 305  | * | 4  | 4.90565E-11 | 0.024703748 | 0.001794692 | 0.003836014 | 0.25112518   | 0.089901664  | RP11-475J5.7                           |
| chr2  | 216489226 | 216489343 | 118  | * | 2  | 4.37436E-08 | 0.099564068 | 0.001795134 | 0.00659309  | -0.324539014 | -0.163915893 | AC012668.2, LINC00607                  |
| chr2  | 180137570 | 180139789 | 2220 | * | 7  | 9.53434E-14 | 0.000265191 | 0.001797319 | 6.44314E-06 | -0.298383357 | 0.001071933  | AC093911.1                             |
| chr6  | 80580112  | 80580937  | 826  | * | 5  | 2.98512E-12 | 0.183031912 | 0.001799327 | 0.029521861 | -0.326798989 | -0.068478164 |                                        |
| chr17 | 3844820   | 3845067   | 248  | * | 2  | 3.63912E-10 | 0.005976538 | 0.001800958 | 0.002732112 | 0.181466985  | 0.104562963  | ATP2A3                                 |
| chr4  | 185352181 | 185352359 | 179  | * | 2  | 2.56103E-09 | 0.129031592 | 0.001802596 | 0.006819678 | -0.273489445 | -0.137582925 | IRF2                                   |
| chr19 | 19574754  | 19576220  | 1467 | * | 8  | 4.2844E-18  | 0.000424558 | 0.001802868 | 1.66722E-05 | -0.217875288 | -0.05217884  | GATAD2A                                |
| chr5  | 131763112 | 131763756 | 645  | * | 3  | 1.72941E-16 | 4.88555E-06 | 0.001803456 | 1.58991E-05 | -0.301300846 | -0.172845748 | C5orf56                                |
| chr18 | 55250568  | 55250579  | 12   | * | 2  | 4.78003E-11 | 0.000130506 | 0.00180713  | 0.000223156 | 0.162006125  | 0.138992763  | FECH                                   |
| chr13 | 113305704 | 113305901 | 198  | * | 2  | 6.62415E-11 | 0.000560686 | 0.001807261 | 0.000664621 | 0.155380668  | 0.095136846  | C13orf35                               |
| chr6  | 134498979 | 134499589 | 611  | * | 8  | 9.76102E-14 | 0.28053927  | 0.001809039 | 0.052158611 | -0.086546731 | -0.015765672 | SGK1                                   |
| chr5  | 173235343 | 173235445 | 103  | * | 2  | 4.04112E-11 | 0.001091635 | 0.001809257 | 0.001041006 | -0.29690623  | -0.190852602 | CTB-43E15.4                            |
| chr3  | 195454591 | 195454921 | 331  | * | 2  | 2.38075E-10 | 0.000618598 | 0.001811336 | 0.000712246 | 0.234889743  | 0.165016722  | LINC00969, MUC20                       |
| chr7  | 129360448 | 129360579 | 132  | * | 2  | 5.29155E-13 | 1.94669E-05 | 0.001813488 | 4.48254E-05 | -0.244016352 | -0.197933108 | NRF1                                   |
| chr18 | 22039496  | 22040005  | 510  | * | 5  | 1.29574E-23 | 1.25325E-06 | 0.00181409  | 1.09339E-06 | -0.327863016 | -0.195406866 |                                        |
| chr11 | 35088518  | 35088821  | 304  | * | 2  | 6.18205E-09 | 0.010845917 | 0.001815748 | 0.003595102 | 0.160583545  | 0.088695028  |                                        |
| chr11 | 35101356  | 35101445  | 90   | * | 2  | 3.79554E-09 | 0.00190022  | 0.001816511 | 0.001472992 | -0.155575483 | -0.102191688 |                                        |
| chr4  | 56859639  | 56860292  | 654  | * | 2  | 2.1181E-11  | 8.82222E-05 | 0.001818721 | 0.000163022 | 0.17528039   | 0.131569035  | CEP135                                 |
| chr1  | 2165579   | 2166155   | 577  | * | 3  | 6.78859E-13 | 0.002401622 | 0.001819969 | 0.000492042 | -0.236119921 | -0.111975711 | SKI                                    |
| chr16 | 19132987  | 19133370  | 384  | * | 3  | 5.70249E-11 | 0.02237269  | 0.001820253 | 0.005387067 | -0.302792757 | -0.104905474 | CTD-2349B8.1                           |
| chr16 | 23869600  | 23869974  | 375  | * | 2  | 1.93927E-11 | 0.000372843 | 0.00182068  | 0.000498139 | -0.075970574 | -0.015761971 | PRKCB                                  |

|       |           |           |      |   |    |             |             |             |             |              |              |                 |
|-------|-----------|-----------|------|---|----|-------------|-------------|-------------|-------------|--------------|--------------|-----------------|
| chr15 | 72511937  | 72512069  | 133  | * | 2  | 8.1537E-09  | 0.004259315 | 0.001820758 | 0.002318976 | 0.197378445  | 0.132055791  | PKM             |
| chr17 | 30130951  | 30131482  | 532  | * | 3  | 1.53188E-11 | 0.031840557 | 0.001826065 | 0.00251556  | -0.251357887 | -0.104352213 |                 |
| chr16 | 2660277   | 2660876   | 600  | * | 3  | 3.39098E-15 | 0.011765919 | 0.001827642 | 0.000373768 | -0.253192161 | -0.146409192 | AC141586.5      |
| chr1  | 2450741   | 2451511   | 771  | * | 4  | 7.10273E-12 | 0.541714181 | 0.001827897 | 0.032792001 | 0.179907391  | 0.043434269  | PANK4           |
| chr16 | 85111583  | 85112625  | 1043 | * | 5  | 1.26491E-22 | 5.19856E-07 | 0.001828146 | 1.28177E-06 | -0.319169507 | -0.119521863 | KIAA0513        |
| chr7  | 30954522  | 30954882  | 361  | * | 2  | 1.2535E-10  | 0.000420922 | 0.001829215 | 0.000544825 | 0.187057197  | 0.153638515  | AQP1, AQP1      |
| chr8  | 101476032 | 101476716 | 685  | * | 3  | 1.00816E-11 | 0.005806052 | 0.001829474 | 0.000231438 | 0.132294986  | 0.07477339   |                 |
| chr2  | 240077557 | 240077990 | 434  | * | 2  | 6.60164E-11 | 0.009750965 | 0.001829494 | 0.003453145 | -0.337145493 | -0.175687852 | HDAC4           |
| chr8  | 48647583  | 48649767  | 2185 | * | 7  | 4.55729E-25 | 3.74778E-08 | 0.001830197 | 3.39649E-08 | -0.244582465 | -0.114910948 | SPIDR, CEBPD    |
| chr2  | 99181318  | 99181779  | 462  | * | 4  | 1.67146E-15 | 0.000313276 | 0.001832637 | 0.000147748 | -0.243874334 | -0.117640822 | INPP4A          |
| chr14 | 24550395  | 24551212  | 818  | * | 7  | 1.19185E-11 | 0.370402085 | 0.001833133 | 0.090072725 | 0.167282746  | 0.033099274  | NRL             |
| chr13 | 99088196  | 99088723  | 528  | * | 4  | 1.96437E-14 | 0.001276799 | 0.001835024 | 0.000399902 | 0.224465772  | 0.089788906  | FARP1           |
| chr19 | 16546817  | 16547001  | 185  | * | 2  | 7.54471E-11 | 0.000183062 | 0.001839498 | 0.000292629 | 0.21241582   | 0.156186231  | EPS15L1         |
| chr13 | 24440615  | 24441476  | 862  | * | 2  | 2.87491E-10 | 2.39931E-05 | 0.001839571 | 5.40365E-05 | 0.206683735  | 0.182063465  | MIPEP           |
| chr6  | 157274188 | 157274454 | 267  | * | 2  | 4.3021E-10  | 0.000647418 | 0.001840317 | 0.000739759 | -0.181979015 | -0.130640824 | ARID1B          |
| chr1  | 224023297 | 224023540 | 244  | * | 2  | 6.61793E-09 | 0.016828446 | 0.001841759 | 0.00431308  | -0.20057169  | -0.090828631 | TP53BP2         |
| chr8  | 7113417   | 7113462   | 46   | * | 2  | 4.85109E-08 | 0.03655369  | 0.001842519 | 0.005516498 | -0.030618117 | -0.0270777   |                 |
| chr11 | 34331548  | 34331908  | 361  | * | 2  | 3.09129E-10 | 0.001535782 | 0.001843555 | 0.001303377 | -0.293579446 | -0.130338779 | ABTB2           |
| chr3  | 131219430 | 131219470 | 41   | * | 3  | 3.9485E-17  | 2.04906E-06 | 0.00184417  | 7.72869E-06 | -0.275456096 | -0.180336402 | MRPL3           |
| chr20 | 37512948  | 37513080  | 133  | * | 2  | 3.49082E-08 | 0.029085985 | 0.001848199 | 0.005184827 | -0.126116808 | -0.054603697 | PPP1R16B        |
| chr16 | 88554846  | 88555715  | 870  | * | 3  | 1.00171E-17 | 3.39972E-07 | 0.001849312 | 1.64366E-06 | 0.190401675  | 0.166587548  | ZFPM1           |
| chr22 | 19166301  | 19167309  | 1009 | * | 12 | 3.1636E-20  | 0.225281597 | 0.00185067  | 0.018896738 | 0.038348846  | 0.0091298    | SLC25A1, CLTCL1 |
| chr2  | 128051925 | 128052889 | 965  | * | 4  | 3.18505E-23 | 1.32302E-06 | 0.001852344 | 3.18099E-06 | -0.323391912 | -0.189073168 |                 |
| chr3  | 112165478 | 112165653 | 176  | * | 2  | 2.7704E-08  | 0.02699502  | 0.001853241 | 0.005079651 | -0.302908744 | -0.156149418 |                 |
| chr6  | 22043778  | 22043967  | 190  | * | 2  | 3.19412E-10 | 0.000410891 | 0.001857496 | 0.000538482 | 0.210763133  | 0.144554406  | CASC15          |
| chr20 | 814736    | 816362    | 1627 | * | 6  | 1.97249E-13 | 0.00563326  | 0.001859886 | 0.001044851 | 0.181329247  | 0.044589787  | FAM110A         |
| chr13 | 30962973  | 30964034  | 1062 | * | 5  | 1.48013E-14 | 0.004899066 | 0.001860414 | 7.33104E-05 | -0.331152025 | -0.13170684  |                 |
| chr2  | 216769058 | 216769199 | 142  | * | 2  | 2.17681E-08 | 0.361553594 | 0.001861197 | 0.007402535 | -0.310018144 | -0.154808876 |                 |
| chr8  | 101442975 | 101443981 | 1007 | * | 5  | 2.61298E-16 | 0.004041017 | 0.001863082 | 0.000360458 | 0.186452205  | 0.06960718   | KB-173C10.1     |

|       |           |           |      |   |    |             |             |             |             |              |              |                                 |
|-------|-----------|-----------|------|---|----|-------------|-------------|-------------|-------------|--------------|--------------|---------------------------------|
| chr15 | 55574912  | 55575701  | 790  | * | 3  | 3.08949E-12 | 0.000140455 | 0.00186369  | 0.000141292 | -0.236112158 | -0.170533976 | RAB27A                          |
| chr17 | 998432    | 999650    | 1219 | * | 5  | 3.8332E-25  | 6.32939E-10 | 0.001863771 | 1.00179E-08 | -0.433139401 | -0.262269612 | ABR                             |
| chr19 | 50069106  | 50069228  | 123  | * | 2  | 5.11184E-08 | 0.093701474 | 0.001863845 | 0.006744529 | 0.162213915  | 0.077898026  | NOSIP                           |
| chr12 | 54197762  | 54198103  | 342  | * | 2  | 2.82578E-09 | 0.005039913 | 0.001864813 | 0.002563677 | 0.127506145  | 0.08900792   |                                 |
| chr3  | 171873675 | 171874327 | 653  | * | 3  | 1.85965E-15 | 0.011015865 | 0.001865031 | 0.000162613 | -0.254012686 | -0.167083405 | FNDC3B                          |
| chr19 | 1236736   | 1237242   | 507  | * | 3  | 4.59974E-13 | 0.010979728 | 0.001865396 | 0.003920075 | 0.148082557  | 0.041774712  | C19orf26                        |
| chr2  | 39931192  | 39931201  | 10   | * | 2  | 6.47197E-10 | 0.000482577 | 0.001866006 | 0.000605405 | -0.105523019 | -0.092081488 | TMEM178A                        |
| chr2  | 29319869  | 29319945  | 77   | * | 2  | 5.82994E-09 | 0.016561097 | 0.001867096 | 0.004328579 | -0.132587968 | -0.054182775 | AC105398.3                      |
| chr4  | 8202280   | 8202708   | 429  | * | 4  | 9.18413E-14 | 0.001223718 | 0.001867365 | 0.000671999 | -0.123521782 | -0.061575763 | SH3TC1                          |
| chr16 | 30721139  | 30721715  | 577  | * | 4  | 2.94721E-20 | 2.3279E-07  | 0.001867459 | 1.23217E-06 | -0.305876349 | -0.16917186  | SRCAP                           |
| chr2  | 134975778 | 134977141 | 1364 | * | 3  | 2.24242E-13 | 5.25555E-07 | 0.001868609 | 2.40418E-06 | -0.304139423 | -0.244915119 | MGAT5                           |
| chr19 | 41200462  | 41200618  | 157  | * | 2  | 3.20702E-08 | 0.048015309 | 0.00186889  | 0.005968212 | 0.167642105  | 0.095637352  | ADCK4                           |
| chr12 | 65048810  | 65049149  | 340  | * | 4  | 3.80543E-18 | 1.23565E-05 | 0.001872156 | 1.17812E-05 | -0.27728719  | -0.13572446  | RASSF3                          |
| chr19 | 52263842  | 52266043  | 2202 | * | 9  | 1.08438E-21 | 0.000962955 | 0.001873133 | 4.29359E-05 | -0.309604105 | -0.066663653 | FPR2, FPR1                      |
| chr10 | 72997126  | 72997755  | 630  | * | 2  | 1.24933E-11 | 5.24756E-05 | 0.001873171 | 0.000106544 | 0.142520358  | 0.127086369  | UNC5B                           |
| chr7  | 65590173  | 65590707  | 535  | * | 2  | 1.02157E-11 | 7.66284E-05 | 0.001874981 | 0.000146279 | -0.256862142 | -0.155644362 | AC068533.7, CRCP, RP5-1132H15.1 |
| chr2  | 179387456 | 179387931 | 476  | * | 4  | 7.87077E-11 | 0.112409388 | 0.00187543  | 0.008889614 | -0.235406168 | -0.087900361 | TTN-AS1                         |
| chr13 | 114897925 | 114898515 | 591  | * | 12 | 1.13263E-14 | 0.487738181 | 0.001880215 | 0.129009373 | -0.093787071 | -0.015748485 | RASA3                           |
| chr1  | 6303793   | 6305348   | 1556 | * | 8  | 5.37626E-16 | 0.190597218 | 0.001883021 | 0.017551021 | 0.109722316  | 0.03666267   | HES3                            |
| chr9  | 100531857 | 100531996 | 140  | * | 2  | 1.98708E-08 | 0.010088459 | 0.001883363 | 0.003570664 | 0.118097809  | 0.086634686  |                                 |
| chr17 | 41844017  | 41844416  | 400  | * | 3  | 7.45157E-11 | 0.011227153 | 0.001883416 | 0.002901224 | -0.266446833 | -0.1074971   | DUSP3                           |
| chr3  | 58512299  | 58512535  | 237  | * | 2  | 3.26147E-09 | 0.002544694 | 0.001887191 | 0.001783074 | -0.223610261 | -0.120433502 | ACOX2                           |
| chr5  | 150677795 | 150678334 | 540  | * | 3  | 4.78539E-11 | 0.015130414 | 0.001889077 | 0.002176254 | -0.245523494 | -0.131123448 | SLC36A3                         |
| chr16 | 89431242  | 89431720  | 479  | * | 3  | 1.77628E-14 | 0.000370898 | 0.001889244 | 0.00025376  | -0.232096756 | -0.087197399 | ANKRD11                         |
| chr1  | 183559527 | 183560294 | 768  | * | 2  | 2.74225E-11 | 0.00014594  | 0.001889395 | 0.000246944 | -0.206861186 | -0.053252252 | SMG7, NCF2                      |
| chr14 | 21483525  | 21483641  | 117  | * | 3  | 3.74024E-15 | 6.72582E-05 | 0.001889483 | 6.17506E-05 | -0.206407202 | -0.151666731 |                                 |
| chr6  | 32179862  | 32180641  | 780  | * | 6  | 3.34215E-16 | 0.13950181  | 0.001889651 | 0.002905219 | -0.369169546 | -0.085349275 | NOTCH4                          |
| chr5  | 158636444 | 158637684 | 1241 | * | 15 | 3.35302E-52 | 2.75602E-07 | 0.00189061  | 3.42968E-10 | -0.317652994 | -0.08145382  | CTB-11I22.1, RNF145             |
| chr11 | 66276414  | 66277055  | 642  | * | 2  | 3.52295E-13 | 0.001679152 | 0.001890697 | 0.001394043 | -0.185743151 | -0.125212408 | DPP3, CTD-307407.11             |



|       |           |           |      |   |    |             |             |             |             |              |              |                          |
|-------|-----------|-----------|------|---|----|-------------|-------------|-------------|-------------|--------------|--------------|--------------------------|
| chr1  | 212291510 | 212291760 | 251  | * | 2  | 2.39933E-08 | 0.082139097 | 0.001891318 | 0.006691338 | 0.151478965  | 0.07322198   |                          |
| chr13 | 114270609 | 114271629 | 1021 | * | 6  | 3.46577E-21 | 3.40061E-06 | 0.001896021 | 3.85474E-06 | -0.308804283 | -0.146585917 | TFDP1                    |
| chr3  | 169866747 | 169867567 | 821  | * | 4  | 1.57682E-14 | 0.129487287 | 0.001898148 | 0.001090711 | -0.3244742   | -0.13786987  | PHC3                     |
| chr2  | 42331922  | 42332600  | 679  | * | 2  | 6.94617E-12 | 4.68248E-05 | 0.001898415 | 9.69891E-05 | -0.330576427 | -0.265294603 |                          |
| chr17 | 75314602  | 75317185  | 2584 | * | 19 | 3.23827E-47 | 8.27497E-06 | 0.001900188 | 6.19001E-08 | -0.339235057 | -0.073836384 | SEPT9                    |
| chr15 | 40339900  | 40340786  | 887  | * | 3  | 2.61923E-15 | 3.81294E-05 | 0.001905821 | 5.32298E-05 | -0.137861358 | -0.10233054  | SRP14-AS1                |
| chr3  | 111314102 | 111314495 | 394  | * | 3  | 1.06192E-10 | 0.037792445 | 0.001906284 | 0.007552903 | -0.226341785 | -0.083894377 | CD96, ZBED2              |
| chr17 | 80246233  | 80246403  | 171  | * | 2  | 2.45561E-10 | 0.002948219 | 0.001910368 | 0.001951341 | 0.140384102  | 0.106446319  |                          |
| chr4  | 185733358 | 185734598 | 1241 | * | 9  | 2.59564E-21 | 0.000257358 | 0.001912919 | 1.14952E-06 | -0.303193025 | -0.100217241 | ACSL1                    |
| chr16 | 69966641  | 69967766  | 1126 | * | 8  | 9.71824E-29 | 2.91243E-05 | 0.00191491  | 9.59419E-07 | -0.342384157 | -0.119502611 | WWP2, MIR140             |
| chr12 | 121714889 | 121715406 | 518  | * | 2  | 4.05426E-12 | 3.966E-05   | 0.001915198 | 8.42781E-05 | -0.303927292 | -0.238302374 | CAMKK2                   |
| chr8  | 19614946  | 19616304  | 1359 | * | 8  | 2.08879E-19 | 0.000394451 | 0.001916751 | 9.98647E-05 | -0.213698342 | -0.064989786 | CSGALNACT1               |
| chr7  | 156930564 | 156930922 | 359  | * | 2  | 1.81347E-11 | 0.001809297 | 0.001917154 | 0.001469039 | -0.334914468 | -0.150677901 |                          |
| chr4  | 157907601 | 157907848 | 248  | * | 2  | 1.89612E-08 | 0.051774111 | 0.001917898 | 0.00619507  | 0.193301257  | 0.093800484  | RPPH1-3P                 |
| chr8  | 126301474 | 126302234 | 761  | * | 3  | 9.30313E-15 | 1.09912E-05 | 0.001918277 | 2.74437E-05 | 0.170750201  | 0.140921485  | NSMCE2                   |
| chr18 | 24040860  | 24041183  | 324  | * | 2  | 1.56814E-09 | 0.208847651 | 0.00191869  | 0.007464032 | 0.187015045  | 0.094044471  | KCTD1                    |
| chr14 | 102499390 | 102499720 | 331  | * | 2  | 1.06196E-09 | 0.071357916 | 0.001918766 | 0.006610096 | -0.347945848 | -0.175536104 | DYNC1H1                  |
| chr22 | 40405832  | 40406049  | 218  | * | 3  | 2.82925E-11 | 0.006931391 | 0.001923837 | 0.002863134 | -0.205541714 | -0.104586382 | FAM83F                   |
| chr20 | 35236199  | 35236543  | 345  | * | 2  | 3.47985E-12 | 4.89109E-05 | 0.001924635 | 0.00010094  | -0.290298557 | -0.084966561 | TGIF2-C20orf24, C20orf24 |
| chr11 | 818331    | 819513    | 1183 | * | 9  | 3.92554E-34 | 5.61507E-05 | 0.001926148 | 2.75992E-07 | -0.28136755  | -0.099157786 | PNPLA2                   |
| chr7  | 2138722   | 2138813   | 92   | * | 2  | 6.91127E-09 | 0.305525867 | 0.001928963 | 0.007610453 | 0.180687132  | 0.090521154  | MAD1L1                   |
| chr5  | 53966914  | 53967333  | 420  | * | 2  | 3.57507E-09 | 0.051359072 | 0.001931503 | 0.006218261 | -0.278623851 | -0.143801985 |                          |
| chr16 | 3646322   | 3646442   | 121  | * | 2  | 2.9722E-09  | 0.109534324 | 0.001932203 | 0.007095109 | 0.182558709  | 0.092732408  | SLX4                     |
| chr9  | 126985646 | 126985794 | 149  | * | 2  | 4.58591E-11 | 0.000122434 | 0.001933737 | 0.000216049 | -0.247463749 | -0.207820295 |                          |
| chr11 | 47437783  | 47438068  | 286  | * | 2  | 4.90454E-10 | 0.006984126 | 0.001934341 | 0.003075061 | -0.198879429 | -0.113842082 | SLC39A13                 |
| chr20 | 2292148   | 2292333   | 186  | * | 2  | 9.4418E-09  | 0.013951534 | 0.001935134 | 0.004154837 | -0.327740966 | -0.170391433 | TGM3                     |
| chr3  | 119030023 | 119030451 | 429  | * | 2  | 1.68125E-12 | 2.4696E-05  | 0.001935385 | 5.58892E-05 | -0.180845316 | -0.179172083 | ARHGAP31                 |
| chr2  | 241807539 | 241808595 | 1057 | * | 8  | 2.35765E-19 | 0.066749294 | 0.001938324 | 0.000885602 | -0.238236873 | -0.052531771 | AGXT                     |
| chr20 | 3026904   | 3027028   | 125  | * | 2  | 3.65498E-09 | 0.004726676 | 0.001940592 | 0.002539276 | 0.027742005  | 0.006300652  | MRPS26                   |

|       |           |           |      |   |    |             |             |             |             |              |              |                            |
|-------|-----------|-----------|------|---|----|-------------|-------------|-------------|-------------|--------------|--------------|----------------------------|
| chr13 | 27883202  | 27883302  | 101  | * | 2  | 2.61081E-09 | 0.001316036 | 0.001941909 | 0.001212464 | -0.173767277 | -0.030424751 |                            |
| chr17 | 28442480  | 28443042  | 563  | * | 2  | 5.14385E-12 | 0.038334137 | 0.001942043 | 0.005814199 | -0.294511649 | -0.142934704 | NSRP1, RP11-1148O4.2       |
| chr1  | 221066688 | 221066979 | 292  | * | 2  | 1.17677E-10 | 0.048507139 | 0.001942211 | 0.006164253 | 0.16594851   | 0.077053486  |                            |
| chr22 | 42830856  | 42831015  | 160  | * | 2  | 1.73563E-08 | 0.099162358 | 0.001942551 | 0.00703419  | -0.254482693 | -0.130946689 |                            |
| chr6  | 82459006  | 82459960  | 955  | * | 3  | 4.55862E-14 | 0.001678744 | 0.001943263 | 0.000428617 | -0.149491699 | -0.100280194 | FAM46A                     |
| chr5  | 3059042   | 3059243   | 202  | * | 3  | 4.35573E-09 | 0.037276098 | 0.001943607 | 0.006868578 | 0.129870396  | 0.060552464  |                            |
| chr14 | 102438447 | 102439006 | 560  | * | 3  | 5.01914E-14 | 1.96707E-05 | 0.001945567 | 4.04531E-05 | -0.214433037 | -0.09088662  | DYNC1H1                    |
| chr6  | 159488631 | 159488668 | 38   | * | 2  | 7.35158E-10 | 0.00343095  | 0.001946671 | 0.00214467  | -0.306125874 | -0.198125283 |                            |
| chr6  | 34789052  | 34789117  | 66   | * | 3  | 5.93207E-09 | 0.232708821 | 0.001947723 | 0.007439157 | -0.271351956 | -0.099397383 | UHRF1BP1                   |
| chr12 | 90256714  | 90257533  | 820  | * | 3  | 6.4586E-15  | 0.00925904  | 0.001948438 | 0.000174378 | 0.080709302  | 0.052703359  |                            |
| chr6  | 109780058 | 109780119 | 62   | * | 2  | 9.48355E-09 | 0.005949644 | 0.001952706 | 0.002862196 | -0.273745344 | -0.168728945 | MICAL1                     |
| chr17 | 75260857  | 75260964  | 108  | * | 3  | 2.78297E-13 | 3.27839E-05 | 0.001953295 | 7.81948E-05 | -0.24078829  | -0.148399306 | RP11-285E9.6, RP11-285E9.5 |
| chr2  | 149017993 | 149018451 | 459  | * | 2  | 7.65588E-10 | 0.021192594 | 0.00195391  | 0.004878955 | 0.109343848  | 0.050234266  | MBD5, SNORA48              |
| chr6  | 149803087 | 149803206 | 120  | * | 3  | 1.73776E-09 | 0.07370228  | 0.001954676 | 0.004709693 | -0.156879858 | -0.064605905 | ZC3H12D                    |
| chr12 | 104194588 | 104194724 | 137  | * | 2  | 2.7777E-08  | 0.127566557 | 0.0019551   | 0.007292936 | -0.164717537 | -0.080104595 | NT5DC3                     |
| chr16 | 30689847  | 30689953  | 107  | * | 2  | 2.74348E-08 | 0.218659228 | 0.001955126 | 0.007604119 | -0.185697092 | -0.092830111 |                            |
| chr2  | 119731566 | 119731815 | 250  | * | 2  | 6.485E-10   | 0.000674283 | 0.001955715 | 0.000779903 | -0.22304778  | -0.074114154 | MARCO                      |
| chr9  | 109683834 | 109684453 | 620  | * | 4  | 4.65575E-14 | 0.002854645 | 0.001956995 | 0.001607511 | 0.223669639  | 0.039571116  | ZNF462                     |
| chr17 | 4620700   | 4621252   | 553  | * | 4  | 2.73366E-12 | 0.008418944 | 0.001958979 | 0.001718529 | -0.314633967 | -0.107888887 | ARRB2                      |
| chr1  | 203489668 | 203489725 | 58   | * | 2  | 1.76511E-13 | 3.0778E-05  | 0.001959394 | 6.79342E-05 | -0.146592472 | -0.133965003 |                            |
| chr17 | 79798629  | 79801920  | 3292 | * | 18 | 1.10878E-36 | 3.59044E-10 | 0.001959868 | 3.11047E-10 | -0.267466569 | -0.101003566 | RP11-498C9.2, P4HB         |
| chr16 | 57713544  | 57714235  | 692  | * | 4  | 2.05132E-15 | 0.00304094  | 0.001965838 | 0.000421896 | -0.123189048 | -0.04824934  | GPR97                      |
| chr1  | 40861387  | 40863166  | 1780 | * | 5  | 4.84732E-19 | 9.06763E-07 | 0.001967178 | 3.42572E-07 | -0.324166008 | -0.228566208 | SMAP2                      |
| chr11 | 115371789 | 115372348 | 560  | * | 2  | 1.19655E-10 | 0.153326283 | 0.001968485 | 0.007466442 | -0.062943447 | -0.031958357 | CADM1                      |
| chr14 | 103432390 | 103432476 | 87   | * | 2  | 7.37382E-09 | 0.031480608 | 0.001968915 | 0.00556191  | -0.240640261 | -0.126601891 | CDC42BPB                   |
| chr6  | 20688798  | 20689477  | 680  | * | 3  | 1.94393E-09 | 0.231476546 | 0.001970099 | 0.01643478  | 0.103878511  | 0.036756757  | CDKAL1                     |
| chr16 | 56886303  | 56886386  | 84   | * | 2  | 1.68329E-09 | 0.001859522 | 0.001971442 | 0.001514431 | -0.146147762 | -0.086842158 |                            |
| chr11 | 63513622  | 63513812  | 191  | * | 2  | 3.36672E-11 | 0.000108288 | 0.001973841 | 0.00019671  | 0.171115109  | 0.157637769  | RTN3                       |
| chr14 | 23007634  | 23008246  | 613  | * | 4  | 1.16956E-11 | 0.06241078  | 0.001974619 | 0.005417033 | -0.253092233 | -0.072664024 | TRAJ6                      |

|       |           |           |      |   |    |             |             |             |             |              |              |                    |
|-------|-----------|-----------|------|---|----|-------------|-------------|-------------|-------------|--------------|--------------|--------------------|
| chr12 | 4324216   | 4324382   | 167  | * | 2  | 1.51132E-08 | 0.00633554  | 0.001974934 | 0.002971751 | -0.202454775 | -0.172577666 |                    |
| chr22 | 46471129  | 46471442  | 314  | * | 2  | 5.0193E-12  | 0.000253127 | 0.001975045 | 0.000383894 | -0.136349916 | -0.012325296 | FLJ27365           |
| chr13 | 111090433 | 111091294 | 862  | * | 8  | 6.41886E-17 | 0.051024915 | 0.001975981 | 0.002161027 | 0.148430728  | 0.041854805  | COL4A2             |
| chr15 | 92874272  | 92874307  | 36   | * | 2  | 3.24009E-08 | 0.015907515 | 0.001977067 | 0.004435261 | 0.121349633  | 0.073027764  |                    |
| chr2  | 74693332  | 74693876  | 545  | * | 4  | 3.98503E-18 | 0.000849101 | 0.001978745 | 0.000276819 | -0.384549116 | -0.165003515 |                    |
| chr11 | 59191289  | 59191513  | 225  | * | 3  | 5.5227E-09  | 0.675250028 | 0.001980131 | 0.013013987 | -0.27799749  | -0.09784547  |                    |
| chr6  | 149805995 | 149806659 | 665  | * | 11 | 4.13691E-27 | 0.000719609 | 0.001980495 | 9.76973E-05 | 0.243479416  | 0.05021266   | ZC3H12D            |
| chr17 | 80415420  | 80416454  | 1035 | * | 15 | 8.17894E-41 | 0.017156828 | 0.001985696 | 4.29758E-05 | -0.309826748 | -0.042251213 | NARF, RP13-20L14.6 |
| chr19 | 10213271  | 10213961  | 691  | * | 8  | 6.87259E-16 | 0.029244899 | 0.001986712 | 0.007058477 | 0.174988305  | -0.019749679 | ANGPTL6            |
| chr16 | 31077385  | 31077750  | 366  | * | 2  | 4.35895E-10 | 0.004301656 | 0.001987101 | 0.002450433 | -0.216861126 | -0.11552799  | AC135050.5, ZNF668 |
| chr10 | 12126673  | 12126715  | 43   | * | 2  | 1.72069E-11 | 6.99211E-05 | 0.001987499 | 0.000137402 | -0.333399165 | -0.248365713 | DHTKD1             |
| chr2  | 119699603 | 119700029 | 427  | * | 4  | 2.26321E-15 | 0.041228262 | 0.001987674 | 0.00039989  | -0.254067959 | -0.117476365 | MARCO              |
| chr13 | 100007116 | 100007277 | 162  | * | 2  | 2.63698E-14 | 3.79271E-05 | 0.001989979 | 8.168E-05   | 0.17694976   | 0.029146054  | UBAC2              |
| chr15 | 75314761  | 75314907  | 147  | * | 2  | 2.05983E-15 | 0.000411072 | 0.001991556 | 0.000552579 | 0.129850345  | 0.077935052  |                    |
| chr7  | 149191957 | 149192381 | 425  | * | 2  | 8.84172E-12 | 0.000298654 | 0.001992057 | 0.000436261 | -0.205666165 | -0.145104537 | ZNF746             |
| chr22 | 32365941  | 32366276  | 336  | * | 4  | 1.96748E-09 | 0.255050806 | 0.001993444 | 0.028176898 | 0.165412606  | 0.055479779  | CTA-342B11.1       |
| chr22 | 28073992  | 28074146  | 155  | * | 4  | 5.66442E-13 | 0.004440803 | 0.00199431  | 0.00054406  | 0.172350834  | 0.077556496  | RP1-213J1P__B.1    |
| chr3  | 47124414  | 47125793  | 1380 | * | 5  | 2.92064E-17 | 0.000817196 | 0.001996021 | 1.06697E-05 | -0.374142243 | -0.205059715 | SETD2              |
| chr5  | 58652602  | 58653738  | 1137 | * | 8  | 5.84273E-30 | 5.90196E-07 | 0.0019974   | 2.09236E-07 | -0.320448754 | -0.089739213 | PDE4D              |
| chr10 | 126826304 | 126826410 | 107  | * | 2  | 2.79965E-09 | 0.017030001 | 0.001997787 | 0.004583105 | 0.195118948  | 0.107633247  | CTBP2              |
| chr17 | 72276181  | 72276388  | 208  | * | 2  | 2.39369E-08 | 0.086884294 | 0.001999499 | 0.007064613 | 0.191780588  | 0.094071216  | DNAI2              |
| chr1  | 28447740  | 28447896  | 157  | * | 2  | 1.78312E-08 | 0.006909379 | 0.00199953  | 0.003122039 | -0.09253332  | -0.030486992 | RP5-1053E7.3       |
| chr12 | 58287143  | 58288081  | 939  | * | 4  | 6.18548E-21 | 9.28849E-05 | 0.00199964  | 4.60205E-06 | -0.230476896 | -0.11810335  | RP11-620J15.2      |
| chr11 | 72454696  | 72455648  | 953  | * | 2  | 1.03183E-09 | 4.4701E-05  | 0.001999862 | 9.41887E-05 | 0.200286003  | 0.176845705  | ARAP1              |
| chr11 | 3852056   | 3852978   | 923  | * | 4  | 1.30087E-16 | 3.90754E-06 | 0.002000967 | 1.26951E-05 | -0.150067645 | -0.108617354 | RHOG               |
| chr20 | 30125302  | 30126382  | 1081 | * | 4  | 4.00711E-13 | 0.000367921 | 0.0020018   | 0.000129565 | -0.314047133 | -0.131801793 | HM13               |
| chr19 | 11517436  | 11517953  | 518  | * | 3  | 1.97408E-10 | 0.031217243 | 0.002002901 | 0.006511819 | -0.303911131 | -0.092767491 | RGL3               |
| chr1  | 10271191  | 10272185  | 995  | * | 7  | 1.34626E-18 | 0.063270508 | 0.002007616 | 0.002477749 | -0.251179844 | -0.046299386 | KIF1B              |
| chr10 | 104392124 | 104392151 | 28   | * | 2  | 2.62465E-08 | 0.205107791 | 0.002010296 | 0.007761279 | -0.128748387 | -0.061472406 | SUFU               |

|       |           |           |      |   |    |             |             |             |             |              |              |                       |
|-------|-----------|-----------|------|---|----|-------------|-------------|-------------|-------------|--------------|--------------|-----------------------|
| chr7  | 2110826   | 2111060   | 235  | * | 2  | 1.20836E-08 | 0.030522998 | 0.002010753 | 0.005598173 | -0.103559351 | -0.053914126 | MAD1L1                |
| chr11 | 67034249  | 67034540  | 292  | * | 3  | 1.94049E-10 | 0.101717312 | 0.002011874 | 0.010817023 | 0.038725286  | 0.012339464  | ADRBK1                |
| chr15 | 93347048  | 93347244  | 197  | * | 2  | 1.22557E-11 | 6.63443E-05 | 0.002014437 | 0.000131886 | -0.24327957  | -0.19061295  | FAM174B               |
| chr19 | 10201790  | 10201834  | 45   | * | 2  | 2.00306E-10 | 0.000538739 | 0.002014514 | 0.000674228 | -0.136051198 | -0.126019191 | C19orf66              |
| chr6  | 170194529 | 170195479 | 951  | * | 3  | 3.51812E-16 | 9.19366E-07 | 0.002019423 | 3.88014E-06 | -0.253113822 | -0.184502317 | LINC00574, LINC00242  |
| chr1  | 248902767 | 248904167 | 1401 | * | 9  | 1.16534E-34 | 7.34443E-09 | 0.002019889 | 2.07653E-09 | -0.330923678 | -0.167189148 | LYPD8                 |
| chr10 | 72026887  | 72027576  | 690  | * | 4  | 7.77814E-11 | 0.174597622 | 0.002022726 | 0.011676074 | -0.26836477  | -0.044353401 | NPFPR1                |
| chr15 | 101597093 | 101597169 | 77   | * | 2  | 4.03381E-09 | 0.003373352 | 0.002026166 | 0.002171763 | -0.183772897 | -0.113258529 | LRRK1, RP11-505E24.2  |
| chr10 | 45849898  | 45850164  | 267  | * | 2  | 2.36739E-09 | 0.001722569 | 0.00202628  | 0.001464631 | 0.158122286  | 0.10801659   |                       |
| chr19 | 49385356  | 49385429  | 74   | * | 2  | 1.99112E-12 | 2.90351E-05 | 0.002027151 | 6.49309E-05 | -0.244588837 | -0.16873653  | TULP2                 |
| chr19 | 850975    | 853540    | 2566 | * | 14 | 7.28682E-40 | 1.10086E-16 | 0.002028401 | 9.35243E-15 | -0.243906436 | -0.13078616  | ELANE                 |
| chr1  | 203198757 | 203199023 | 267  | * | 3  | 1.38831E-15 | 6.58822E-05 | 0.002030612 | 0.00010041  | -0.290104253 | -0.167824966 | CHIT1                 |
| chr11 | 118094830 | 118096372 | 1543 | * | 6  | 1.94208E-24 | 1.4431E-06  | 0.002030924 | 1.59415E-06 | -0.286570932 | -0.127335103 | AMICA1                |
| chr1  | 238025414 | 238025587 | 174  | * | 4  | 1.6833E-13  | 0.002518884 | 0.00203192  | 0.000370121 | -0.274818269 | -0.132611351 | RP11-193H5.1          |
| chr6  | 24489671  | 24490221  | 551  | * | 6  | 8.16711E-24 | 0.000782996 | 0.002032374 | 2.22675E-05 | -0.160925092 | -0.075014741 | GPLD1                 |
| chr4  | 26206080  | 26206130  | 51   | * | 2  | 3.38699E-11 | 9.19571E-05 | 0.002033437 | 0.000173388 | -0.086613121 | -0.084155469 | RBPJ                  |
| chr16 | 85622137  | 85622276  | 140  | * | 3  | 4.03181E-13 | 0.001497048 | 0.002034942 | 0.000203016 | 0.201322204  | 0.12702499   |                       |
| chr17 | 27418559  | 27419266  | 708  | * | 6  | 7.90264E-23 | 4.64794E-05 | 0.002034981 | 2.90436E-05 | 0.172730426  | 0.083937893  | MYO18A                |
| chr15 | 93383226  | 93383415  | 190  | * | 2  | 2.84096E-08 | 0.01412779  | 0.002035292 | 0.004319949 | -0.255794476 | -0.136267486 |                       |
| chr1  | 235092611 | 235092860 | 250  | * | 4  | 1.22216E-15 | 9.55487E-05 | 0.002036887 | 0.000196775 | -0.341306195 | -0.250675381 |                       |
| chr18 | 60903834  | 60904328  | 495  | * | 3  | 4.00926E-12 | 0.011144608 | 0.002037237 | 0.002398937 | -0.078979982 | -0.058391637 | BCL2                  |
| chr9  | 140942546 | 140942584 | 39   | * | 2  | 1.60865E-07 | 0.021056611 | 0.002037717 | 0.005015288 | -0.222631548 | -0.101125293 | CACNA1B               |
| chr20 | 1614192   | 1614462   | 271  | * | 2  | 2.96727E-09 | 0.00734168  | 0.002040415 | 0.003253547 | -0.287845305 | -0.157164665 | RP11-77C3.3, SIRPG    |
| chr16 | 65159613  | 65160241  | 629  | * | 3  | 1.22623E-09 | 0.040549635 | 0.002041007 | 0.008894771 | -0.193338571 | -0.05146291  | CDH11                 |
| chr8  | 669161    | 670293    | 1133 | * | 7  | 3.09678E-17 | 0.003604159 | 0.00204184  | 0.002459077 | 0.107643051  | 0.031308877  | ERICH1                |
| chr11 | 62473858  | 62474118  | 261  | * | 7  | 1.22002E-10 | 0.769614174 | 0.002045198 | 0.133387933 | 0.110215558  | 0.01511228   | BSCL2, HNRNPUL2-BSCL2 |
| chr21 | 30722759  | 30722924  | 166  | * | 2  | 1.5642E-08  | 0.113681181 | 0.002045909 | 0.007475032 | 0.216618124  | 0.111223951  | BACH1                 |
| chr20 | 48891434  | 48892664  | 1231 | * | 4  | 5.04661E-18 | 0.000447753 | 0.00204982  | 7.20863E-05 | -0.267598637 | -0.13461442  | RP11-290F20.3         |
| chr19 | 1154276   | 1155738   | 1463 | * | 7  | 2.07877E-31 | 5.25651E-07 | 0.00205056  | 2.53775E-08 | -0.252711993 | -0.156366199 | SBNO2                 |

|       |           |           |      |   |    |             |             |             |             |              |              |                        |
|-------|-----------|-----------|------|---|----|-------------|-------------|-------------|-------------|--------------|--------------|------------------------|
| chr8  | 128231103 | 128232015 | 913  | * | 5  | 4.77015E-15 | 0.033659779 | 0.002051251 | 0.001153636 | -0.200108139 | -0.087165815 | CCAT1                  |
| chr12 | 57386819  | 57387400  | 582  | * | 6  | 5.53019E-24 | 3.40189E-06 | 0.002053328 | 4.80506E-06 | -0.303693427 | -0.122976951 |                        |
| chr6  | 170364239 | 170365361 | 1123 | * | 4  | 4.73502E-13 | 9.23367E-05 | 0.002054267 | 1.66305E-05 | -0.26560326  | -0.124143259 |                        |
| chr16 | 28997459  | 28999707  | 2249 | * | 8  | 3.48202E-26 | 1.51654E-09 | 0.002054891 | 5.44725E-09 | 0.227488653  | 0.092502596  | RP11-264B17.3, LAT     |
| chr7  | 127861992 | 127862224 | 233  | * | 2  | 2.96165E-08 | 0.022515464 | 0.002054946 | 0.005162566 | -0.098826093 | -0.063889571 |                        |
| chr9  | 125693565 | 125694300 | 736  | * | 5  | 3.45039E-10 | 0.611016819 | 0.002057097 | 0.051218555 | -0.069548378 | -0.016124507 | ZBTB26                 |
| chr17 | 14206572  | 14207241  | 670  | * | 9  | 5.14082E-13 | 0.401527061 | 0.002061394 | 0.092012364 | -0.122993565 | 0.005339215  | HS3ST3B1, RP11-214O1.2 |
| chr1  | 158800880 | 158801271 | 392  | * | 3  | 2.79206E-14 | 1.90035E-05 | 0.002061439 | 5.01153E-05 | -0.213891826 | -0.13076742  | MNDA                   |
| chr11 | 134118834 | 134118974 | 141  | * | 2  | 2.21237E-08 | 0.126862248 | 0.002062304 | 0.007622045 | 0.179403469  | 0.087458468  | THYN1                  |
| chr19 | 2430539   | 2431468   | 930  | * | 5  | 1.60745E-20 | 0.00250046  | 0.002064065 | 0.000207454 | -0.186451957 | -0.052305993 | LMNB2                  |
| chr1  | 153362927 | 153364020 | 1094 | * | 9  | 1.42846E-39 | 1.05804E-11 | 0.002064531 | 4.56807E-11 | -0.311210904 | -0.174524387 | S100A8                 |
| chr17 | 8815262   | 8816266   | 1005 | * | 7  | 7.05493E-18 | 0.028967629 | 0.002064556 | 0.002038157 | 0.164144453  | 0.043048128  | PIK3R5                 |
| chr22 | 37782781  | 37782857  | 77   | * | 3  | 2.44499E-12 | 0.000134704 | 0.00206544  | 0.000237163 | 0.177423128  | 0.116473479  | RP1-63G5.5, ELFN2      |
| chr1  | 160708987 | 160709239 | 253  | * | 3  | 4.26857E-13 | 5.04063E-05 | 0.002065761 | 0.000108087 | -0.190249324 | -0.089831732 | SLAMF7                 |
| chr21 | 35190531  | 35190823  | 293  | * | 3  | 3.55219E-09 | 0.104584489 | 0.002066786 | 0.009437028 | -0.28685601  | -0.083964625 | ITSN1, AP000304.12     |
| chr12 | 133248929 | 133249308 | 380  | * | 6  | 5.53342E-19 | 0.00098251  | 0.002068019 | 0.000156996 | -0.379875833 | -0.06554354  | POLE                   |
| chr5  | 57786008  | 57786449  | 442  | * | 5  | 1.64328E-10 | 0.091926485 | 0.002070299 | 0.02173831  | -0.24731394  | -0.037662294 |                        |
| chr2  | 145170401 | 145170848 | 448  | * | 3  | 2.30854E-13 | 3.20009E-05 | 0.002073431 | 6.52386E-05 | -0.230595488 | -0.048813043 | ZEB2                   |
| chr2  | 144995448 | 144996219 | 772  | * | 3  | 9.37026E-11 | 0.098619482 | 0.002075022 | 0.012289522 | -0.192300275 | -0.047641031 | GTDC1                  |
| chr14 | 51027861  | 51028564  | 704  | * | 3  | 6.69247E-13 | 0.014402435 | 0.002076594 | 0.00524438  | -0.204576236 | -0.070299367 | ATL1                   |
| chr12 | 132303409 | 132303880 | 472  | * | 5  | 1.38406E-22 | 1.85135E-06 | 0.002077838 | 1.81957E-06 | -0.340158223 | -0.185885551 |                        |
| chr4  | 183838736 | 183839473 | 738  | * | 12 | 1.49752E-19 | 0.101807242 | 0.002078047 | 0.011864849 | 0.15139611   | 0.025063507  | DCTD                   |
| chr11 | 67803715  | 67804112  | 398  | * | 5  | 6.37406E-16 | 0.056600023 | 0.002079999 | 0.000588353 | -0.207169404 | -0.078301997 | NDUFS8                 |
| chr10 | 49647801  | 49648060  | 260  | * | 2  | 8.57752E-10 | 0.001958802 | 0.002081617 | 0.001605589 | -0.186453329 | -0.131404319 |                        |
| chr5  | 149494527 | 149494751 | 225  | * | 2  | 2.27025E-09 | 0.016539131 | 0.002081929 | 0.00466347  | 0.181756713  | 0.113986431  | PDGFRB                 |
| chr11 | 68694943  | 68695532  | 590  | * | 2  | 2.46599E-11 | 8.69302E-05 | 0.002082304 | 0.000166473 | -0.210779985 | -0.1854795   | IGHMBP2                |
| chr17 | 56345257  | 56345839  | 583  | * | 2  | 4.69651E-11 | 0.000166044 | 0.002082854 | 0.000281221 | -0.339498741 | -0.250823484 | LPO                    |
| chr19 | 4518598   | 4519155   | 558  | * | 4  | 1.75609E-18 | 4.14575E-05 | 0.002083038 | 6.37481E-05 | -0.160644076 | -0.114726453 |                        |
| chr2  | 9562849   | 9565042   | 2194 | * | 20 | 5.10295E-34 | 0.000429137 | 0.002084966 | 7.473E-06   | -0.372800325 | -0.034543609 | CPSF3, ITGB1BP1        |

|       |           |           |      |   |    |             |             |             |             |              |              |                                          |
|-------|-----------|-----------|------|---|----|-------------|-------------|-------------|-------------|--------------|--------------|------------------------------------------|
| chr22 | 37317797  | 37320126  | 2330 | * | 9  | 2.53757E-19 | 7.5228E-06  | 0.002086508 | 5.94183E-07 | -0.29285051  | -0.083664643 | CSF2RB                                   |
| chr2  | 8767362   | 8767381   | 20   | * | 2  | 4.0353E-09  | 0.003940355 | 0.002088048 | 0.002404154 | -0.200678391 | -0.112559616 |                                          |
| chr7  | 139366500 | 139366758 | 259  | * | 2  | 7.33049E-09 | 0.052757739 | 0.002089341 | 0.006652021 | 0.180976706  | 0.095981427  | HIPK2                                    |
| chr3  | 49866227  | 49866346  | 120  | * | 2  | 1.08687E-12 | 2.68616E-05 | 0.002091982 | 6.09475E-05 | 0.22277722   | 0.216945405  | TRAIP                                    |
| chr8  | 144577050 | 144577094 | 45   | * | 2  | 1.84312E-07 | 0.099795633 | 0.002092986 | 0.007487033 | 0.071194486  | 0.034449349  | ZC3H3                                    |
| chr18 | 688285    | 689054    | 770  | * | 3  | 5.03256E-14 | 0.004164669 | 0.002097341 | 0.000235126 | -0.159647013 | -0.096143201 | ENOSF1                                   |
| chr16 | 49672617  | 49672687  | 71   | * | 2  | 1.21216E-07 | 0.187190636 | 0.002098348 | 0.008005446 | -0.159056494 | -0.080193854 | ZNF423                                   |
| chr16 | 27767814  | 27767978  | 165  | * | 2  | 3.63025E-08 | 0.059987879 | 0.002099354 | 0.006866387 | -0.146070318 | -0.074542034 | KIAA0556                                 |
| chr2  | 240290984 | 240291958 | 975  | * | 7  | 8.9087E-19  | 0.042960418 | 0.0020996   | 0.001914873 | -0.285314532 | -0.067629572 | HDAC4                                    |
| chr18 | 74725828  | 74726002  | 175  | * | 2  | 1.19756E-08 | 0.004446283 | 0.002099625 | 0.002572779 | -0.23873378  | -0.144387068 | MBP                                      |
| chr17 | 48608677  | 48609332  | 656  | * | 4  | 7.34719E-11 | 0.033637846 | 0.0020997   | 0.009963542 | -0.302108141 | -0.079153493 | MYCBPAP                                  |
| chr2  | 38405469  | 38406306  | 838  | * | 2  | 1.53913E-10 | 7.01616E-05 | 0.002099993 | 0.000139505 | -0.135801878 | -0.131736936 | CYP1B1-AS1                               |
| chr2  | 208100660 | 208101334 | 675  | * | 3  | 6.2085E-13  | 0.001279919 | 0.002101593 | 0.000158503 | -0.322974025 | -0.206249716 | AC007879.2, AC007879.3                   |
| chr2  | 230989183 | 230989623 | 441  | * | 3  | 4.58025E-16 | 0.000392382 | 0.002101641 | 0.000140994 | -0.217792185 | -0.128018175 |                                          |
| chr2  | 242954018 | 242954430 | 413  | * | 3  | 5.25289E-11 | 0.135182749 | 0.00210207  | 0.01528316  | -0.357675121 | -0.117808957 | AC131097.3                               |
| chr4  | 89378894  | 89379578  | 685  | * | 5  | 2.54054E-14 | 0.229734721 | 0.002104112 | 0.01530448  | -0.320477244 | -0.071239726 | HERC5                                    |
| chr1  | 95064909  | 95064974  | 66   | * | 2  | 2.18102E-09 | 0.001162277 | 0.002106865 | 0.001161338 | -0.164439753 | -0.11895509  |                                          |
| chr9  | 131355186 | 131355483 | 298  | * | 2  | 1.83975E-08 | 0.023520027 | 0.002107088 | 0.005333612 | 0.179425322  | 0.093967139  | SPTAN1                                   |
| chr20 | 35422495  | 35423080  | 586  | * | 3  | 4.0655E-10  | 0.02472184  | 0.002110288 | 0.006637436 | 0.166176694  | 0.069019449  | SOGA1                                    |
| chr8  | 141572044 | 141572142 | 99   | * | 2  | 9.11333E-12 | 0.000232819 | 0.002111795 | 0.000367783 | -0.193424105 | -0.126702332 | AGO2                                     |
| chr22 | 31608519  | 31609244  | 726  | * | 4  | 2.25392E-19 | 0.000721905 | 0.002112841 | 0.00047747  | -0.170175701 | -0.051076888 | LIMK2                                    |
| chr5  | 171432751 | 171433005 | 255  | * | 2  | 6.50099E-11 | 0.153865335 | 0.002115603 | 0.007938605 | 0.017083864  | 0.007899306  | FBXW11                                   |
| chr12 | 54783416  | 54784180  | 765  | * | 2  | 7.85827E-11 | 0.001175221 | 0.002115751 | 0.001171978 | 0.16362867   | 0.062117957  | RP11-753H16.3, RP11-753H16.5,<br>ZNF385A |
| chr1  | 23343326  | 23343542  | 217  | * | 2  | 3.25434E-08 | 0.069707748 | 0.002117207 | 0.00712273  | -0.205264454 | -0.111164661 |                                          |
| chr3  | 71295335  | 71295684  | 350  | * | 5  | 2.14081E-14 | 0.015596649 | 0.002122907 | 0.000562039 | 0.215523425  | 0.086697926  | FOXP1                                    |
| chr7  | 154777894 | 154778512 | 619  | * | 5  | 3.30791E-10 | 0.325500797 | 0.002124902 | 0.037137822 | -0.170064003 | -0.033110986 | PAXIP1                                   |
| chr21 | 48054897  | 48055715  | 819  | * | 13 | 1.59702E-30 | 0.00740656  | 0.002127566 | 4.91596E-06 | -0.048385351 | 0.003359352  | PRMT2                                    |
| chr9  | 101010744 | 101011718 | 975  | * | 4  | 3.24463E-16 | 1.28325E-05 | 0.002128578 | 1.54703E-05 | -0.230593442 | -0.139825595 | TBC1D2                                   |
| chr14 | 75301206  | 75301411  | 206  | * | 2  | 4.90694E-13 | 2.74727E-05 | 0.00212903  | 6.2344E-05  | 0.169522067  | 0.163492604  | YLPM1                                    |

|       |           |           |      |   |    |             |             |             |             |              |              |                     |
|-------|-----------|-----------|------|---|----|-------------|-------------|-------------|-------------|--------------|--------------|---------------------|
| chr11 | 36448470  | 36448722  | 253  | * | 2  | 1.26953E-09 | 0.00212787  | 0.002131355 | 0.001707967 | -0.176646852 | -0.105517097 | PRR5L               |
| chr12 | 132397677 | 132398533 | 857  | * | 5  | 1.03439E-23 | 9.11372E-05 | 0.002133873 | 2.14474E-06 | -0.162924447 | -0.081785583 | ULK1                |
| chr2  | 33516023  | 33516791  | 769  | * | 3  | 5.02836E-15 | 3.65546E-05 | 0.002134208 | 5.26482E-05 | 0.156563782  | 0.121354687  | LTBP1               |
| chr19 | 19496104  | 19496697  | 594  | * | 8  | 3.64078E-15 | 0.097108849 | 0.002135868 | 0.005548445 | 0.023619979  | 0.008184703  | GATAD2A             |
| chr4  | 3322285   | 3322357   | 73   | * | 2  | 3.47222E-08 | 0.014420002 | 0.002135926 | 0.004498761 | 0.160355551  | 0.101382529  | RGS12               |
| chr14 | 24801970  | 24802150  | 181  | * | 2  | 8.44457E-10 | 0.002389078 | 0.002135936 | 0.001832246 | -0.068268735 | -0.047390283 | ADCY4, RP11-934B9.3 |
| chr12 | 66061959  | 66062166  | 208  | * | 2  | 9.75837E-09 | 0.025415088 | 0.002136797 | 0.005527389 | -0.174466854 | -0.10428222  |                     |
| chr17 | 73631460  | 73631785  | 326  | * | 3  | 8.95263E-16 | 0.000184391 | 0.002136953 | 9.66642E-05 | 0.203157331  | 0.100914983  | SMIM5, RECQL5       |
| chr13 | 27843068  | 27843690  | 623  | * | 4  | 8.22329E-11 | 0.047503265 | 0.002137666 | 0.010694779 | 0.187746496  | 0.043268719  |                     |
| chr13 | 45390049  | 45390159  | 111  | * | 2  | 1.06488E-08 | 0.00641462  | 0.002138921 | 0.003136571 | -0.155472526 | -0.092900348 |                     |
| chr11 | 65770645  | 65771070  | 426  | * | 3  | 1.07027E-12 | 0.114801444 | 0.002141939 | 0.014049343 | 0.137727252  | 0.057771484  | BANF1               |
| chr16 | 3354260   | 3355079   | 820  | * | 4  | 8.67787E-16 | 0.033484137 | 0.00214307  | 0.005490951 | -0.20444337  | -0.035796925 | TIGD7               |
| chr10 | 22725204  | 22726060  | 857  | * | 6  | 7.56471E-20 | 0.000107432 | 0.002143358 | 4.60966E-05 | 0.191278091  | 0.090089062  | SPAG6               |
| chr18 | 74214646  | 74214729  | 84   | * | 2  | 3.54918E-12 | 3.45739E-05 | 0.002143641 | 7.63766E-05 | -0.310386837 | -0.310142562 |                     |
| chr20 | 32668426  | 32668826  | 401  | * | 3  | 6.89012E-09 | 0.344691105 | 0.002148164 | 0.020380335 | 0.098779973  | 0.039013407  | RALY                |
| chr21 | 36261693  | 36261702  | 10   | * | 2  | 6.15894E-10 | 0.196341702 | 0.002151673 | 0.008204671 | 0.02422309   | 0.012102793  | RUNX1               |
| chr11 | 62366806  | 62367988  | 1183 | * | 6  | 2.16312E-18 | 0.056624805 | 0.00215257  | 0.001427112 | 0.223427961  | 0.002059361  | MTA2                |
| chr10 | 71867147  | 71868555  | 1409 | * | 5  | 3.12189E-17 | 0.055787279 | 0.002153261 | 0.00065137  | 0.19237726   | 0.074472836  | H2AFY2, AIFM2       |
| chr5  | 123919649 | 123920010 | 362  | * | 2  | 4.77411E-10 | 0.000792898 | 0.002153566 | 0.000907027 | 0.208358405  | 0.133025951  |                     |
| chr17 | 79047681  | 79048599  | 919  | * | 5  | 1.60424E-17 | 0.002759202 | 0.002154004 | 0.000137242 | -0.285716688 | -0.116633452 | BAIAP2              |
| chr1  | 17424524  | 17425160  | 637  | * | 2  | 8.23171E-12 | 3.01095E-05 | 0.002155959 | 6.77247E-05 | -0.186952645 | -0.142751252 | PADI2               |
| chr11 | 22850866  | 22851502  | 637  | * | 11 | 1.50017E-13 | 0.176788995 | 0.002161339 | 0.053893249 | 0.036545799  | 0.003844807  | RP11-17A1.3, SVIP   |
| chr3  | 147089362 | 147089629 | 268  | * | 2  | 5.47867E-09 | 0.171033416 | 0.002161589 | 0.008156492 | 0.146074356  | 0.074194344  |                     |
| chr22 | 35806330  | 35807232  | 903  | * | 5  | 4.43773E-14 | 0.001211626 | 0.002162307 | 5.7583E-05  | -0.176147717 | 0.004879048  | MCM5                |
| chr5  | 88589895  | 88590117  | 223  | * | 2  | 1.23581E-08 | 0.00464837  | 0.002162974 | 0.002678705 | -0.176322306 | -0.109130546 | MEF2C-AS1           |
| chr1  | 59041407  | 59044110  | 2704 | * | 16 | 7.7148E-34  | 3.83858E-06 | 0.002164632 | 5.38808E-09 | -0.353022496 | -0.105829975 | TACSTD2             |
| chr2  | 37642493  | 37642646  | 154  | * | 2  | 5.70003E-09 | 0.001747313 | 0.002167754 | 0.001526454 | 0.185214775  | 0.133590535  |                     |
| chr8  | 68287227  | 68287355  | 129  | * | 2  | 3.10645E-08 | 0.007523733 | 0.002169485 | 0.003417616 | -0.266281841 | -0.148274807 |                     |
| chr6  | 6588089   | 6589075   | 987  | * | 7  | 7.72939E-17 | 0.006016364 | 0.00217739  | 0.000492008 | 0.166708043  | 0.037606361  | LY86, LY86-AS1      |

|       |           |           |      |   |    |             |             |             |             |              |              |                                          |
|-------|-----------|-----------|------|---|----|-------------|-------------|-------------|-------------|--------------|--------------|------------------------------------------|
| chr2  | 59504985  | 59505167  | 183  | * | 2  | 4.73858E-08 | 0.019877213 | 0.002178583 | 0.005150459 | -0.345425253 | -0.177908355 | AC007131.1, RP11-444A22.1,<br>AC007131.2 |
| chr9  | 127024180 | 127025282 | 1103 | * | 5  | 1.50918E-14 | 0.024563334 | 0.002179176 | 0.001865802 | -0.255545472 | -0.082208402 | NEK6, RP11-121A14.3                      |
| chr22 | 39868756  | 39869399  | 644  | * | 2  | 2.84192E-12 | 4.01457E-05 | 0.002182298 | 8.72652E-05 | 0.116897574  | 0.012883196  | MGAT3                                    |
| chr10 | 121297031 | 121297227 | 197  | * | 2  | 8.8514E-09  | 0.011188529 | 0.002184285 | 0.004109483 | 0.198520177  | 0.111048106  | RGS10                                    |
| chr5  | 39470228  | 39470464  | 237  | * | 2  | 4.21752E-12 | 3.79617E-05 | 0.002189745 | 8.3173E-05  | -0.27615586  | -0.215774693 |                                          |
| chr19 | 54809989  | 54810355  | 367  | * | 5  | 1.16684E-12 | 0.003036225 | 0.002192528 | 0.001600753 | -0.296720894 | -0.093869015 |                                          |
| chr1  | 66859276  | 66859345  | 70   | * | 2  | 7.04182E-12 | 4.38865E-05 | 0.002194224 | 9.43621E-05 | -0.217000562 | -0.19946003  |                                          |
| chr10 | 100011569 | 100011724 | 156  | * | 4  | 6.32417E-10 | 0.078758449 | 0.002196215 | 0.012877495 | 0.160580302  | 0.047337245  | LOXL4                                    |
| chr17 | 42983032  | 42983267  | 236  | * | 2  | 2.14324E-11 | 0.001258821 | 0.002197612 | 0.001246726 | 0.159991328  | 0.119449556  | GFAP                                     |
| chr7  | 65791335  | 65791671  | 337  | * | 2  | 1.73565E-08 | 0.053139898 | 0.002198727 | 0.006933259 | -0.307255033 | -0.164902923 | TPST1                                    |
| chr5  | 173219000 | 173219205 | 206  | * | 2  | 6.72974E-09 | 0.029350792 | 0.002198733 | 0.005907651 | 0.117729525  | 0.055249408  | CTB-43E15.4                              |
| chr4  | 140968835 | 140969039 | 205  | * | 2  | 1.43322E-08 | 0.008247887 | 0.002201403 | 0.00360117  | 0.138830337  | 0.092617981  | MAML3                                    |
| chr11 | 10924151  | 10924478  | 328  | * | 2  | 5.73282E-10 | 0.000591759 | 0.00220286  | 0.000745883 | 0.153614641  | 0.012020777  | ZBED5-AS1                                |
| chr16 | 81642149  | 81642691  | 543  | * | 3  | 7.65009E-15 | 3.85708E-05 | 0.002203335 | 9.37013E-05 | -0.268725499 | -0.134866084 | CMIP                                     |
| chr1  | 203155737 | 203156784 | 1048 | * | 8  | 6.37993E-22 | 7.98539E-06 | 0.002207341 | 2.90494E-06 | -0.315134232 | -0.118569724 | CHI3L1                                   |
| chr21 | 44010866  | 44010869  | 4    | * | 2  | 2.40967E-12 | 2.89069E-05 | 0.002208555 | 6.55908E-05 | -0.11983094  | -0.11167185  |                                          |
| chr2  | 217280995 | 217281424 | 430  | * | 2  | 9.82279E-11 | 0.000871016 | 0.002208757 | 0.000977436 | 0.191825597  | 0.118198078  | SMARCAL1                                 |
| chr12 | 6752881   | 6753626   | 746  | * | 6  | 5.51699E-26 | 2.48395E-06 | 0.00221032  | 4.36477E-07 | -0.332934352 | -0.17212245  | ACRBP                                    |
| chr22 | 39347307  | 39348639  | 1333 | * | 6  | 4.86696E-22 | 8.39025E-06 | 0.002210422 | 1.82517E-06 | -0.192758143 | -0.052194517 |                                          |
| chr22 | 31642860  | 31644558  | 1699 | * | 12 | 5.14501E-31 | 4.69165E-06 | 0.002216652 | 2.77376E-07 | 0.238259335  | 0.003684533  | LIMK2                                    |
| chr19 | 4539943   | 4544095   | 4153 | * | 14 | 3.89129E-35 | 3.21683E-15 | 0.002219369 | 1.17665E-14 | -0.297901596 | -0.139167598 | CTB-50L17.14, LRG1, SEMA6B               |
| chr22 | 23449278  | 23449985  | 708  | * | 2  | 1.24749E-10 | 2.91987E-05 | 0.002222968 | 6.62434E-05 | 0.197639166  | 0.184390676  | GNAZ, RTDR1                              |
| chr4  | 142142166 | 142142438 | 273  | * | 3  | 1.85575E-08 | 0.036023909 | 0.002223444 | 0.006805373 | 0.02978077   | 0.012093756  | ZNF330                                   |
| chr14 | 107079290 | 107079472 | 183  | * | 2  | 1.63043E-08 | 0.072361506 | 0.002225641 | 0.007465446 | 0.13642791   | 0.065096153  |                                          |
| chr11 | 34229970  | 34230092  | 123  | * | 2  | 6.26488E-08 | 0.017886726 | 0.002227078 | 0.005030587 | -0.271142981 | -0.143180002 | ABTB2                                    |
| chr22 | 37256352  | 37257594  | 1243 | * | 7  | 4.88395E-23 | 7.98376E-05 | 0.00222796  | 1.09978E-05 | -0.221854309 | -0.070306972 | NCF4, CTA-833B7.2                        |
| chr13 | 52732648  | 52734432  | 1785 | * | 21 | 1.19199E-26 | 0.027598596 | 0.002230084 | 0.005160465 | -0.32644284  | -0.003611682 | NEK3                                     |
| chr3  | 101503735 | 101504046 | 312  | * | 3  | 9.40809E-13 | 0.003514264 | 0.0022323   | 0.000675251 | -0.278894798 | -0.151653402 | NXPE3                                    |
| chr2  | 75145273  | 75145387  | 115  | * | 2  | 7.23566E-09 | 0.016425789 | 0.00223585  | 0.004883055 | 0.086706807  | 0.051943659  | AC104135.3                               |



|       |           |           |      |   |    |             |             |             |             |              |              |                                          |
|-------|-----------|-----------|------|---|----|-------------|-------------|-------------|-------------|--------------|--------------|------------------------------------------|
| chr14 | 88469009  | 88469180  | 172  | * | 2  | 2.35832E-08 | 0.025224084 | 0.002237958 | 0.005699994 | -0.263170972 | -0.122344796 |                                          |
| chr22 | 17703558  | 17703776  | 219  | * | 4  | 5.5177E-12  | 0.093047893 | 0.00223799  | 0.011050764 | -0.178657951 | -0.050674165 |                                          |
| chr14 | 62036609  | 62037555  | 947  | * | 6  | 6.16686E-21 | 1.4613E-05  | 0.00223822  | 7.31989E-06 | -0.109495644 | -0.064597691 | RP11-47I22.4, RP11-47I22.3, RP11-47I22.2 |
| chr7  | 210075    | 210429    | 355  | * | 2  | 1.81838E-11 | 0.020773455 | 0.002240147 | 0.005335381 | 0.024507297  | 0.01716268   | FAM20C                                   |
| chr11 | 33744823  | 33745446  | 624  | * | 4  | 2.45497E-16 | 0.01724673  | 0.002246783 | 0.000770493 | -0.295549747 | -0.086920321 | CD59                                     |
| chr5  | 67520858  | 67522532  | 1675 | * | 10 | 2.42353E-20 | 0.003216117 | 0.002247123 | 1.02145E-05 | 0.17509623   | 0.018766439  | PIK3R1                                   |
| chr8  | 28195955  | 28197671  | 1717 | * | 10 | 6.10361E-32 | 0.002433848 | 0.002247227 | 6.01874E-05 | -0.326445724 | -0.087341989 | PNOC, RP11-380I10.4                      |
| chr13 | 115026464 | 115027249 | 786  | * | 3  | 4.47918E-13 | 0.003384332 | 0.002247332 | 0.000210136 | -0.176077428 | -0.031424009 | CDC16                                    |
| chr13 | 24758029  | 24758155  | 127  | * | 2  | 4.62466E-10 | 0.001028706 | 0.002248279 | 0.001102011 | -0.089024886 | -0.061890017 | RP11-307N16.6, SPATA13                   |
| chr11 | 95374762  | 95374866  | 105  | * | 2  | 4.6935E-10  | 0.000509636 | 0.002248353 | 0.00067522  | -0.288584889 | -0.162286205 |                                          |
| chr10 | 129949483 | 129949871 | 389  | * | 2  | 9.47976E-13 | 0.000612925 | 0.002250777 | 0.000771081 | 0.119672768  | 0.085605199  |                                          |
| chr21 | 35883571  | 35884679  | 1109 | * | 7  | 2.7589E-27  | 4.09162E-08 | 0.00225302  | 1.92521E-07 | -0.247623724 | -0.133548539 | KCNE1                                    |
| chr11 | 63258712  | 63259705  | 994  | * | 10 | 1.08727E-19 | 0.235632135 | 0.002253273 | 0.0054192   | -0.205834858 | -0.045184518 |                                          |
| chr12 | 56537247  | 56537425  | 179  | * | 2  | 3.46301E-08 | 0.08656573  | 0.002253723 | 0.007782992 | -0.233715572 | -0.112729603 | ESYT1                                    |
| chr15 | 90371358  | 90371981  | 624  | * | 4  | 8.18548E-14 | 0.006825812 | 0.002253947 | 0.00053552  | -0.291102927 | -0.109663244 |                                          |
| chr13 | 115085283 | 115085339 | 57   | * | 2  | 3.93248E-12 | 3.42445E-05 | 0.002255027 | 7.63953E-05 | 0.143968448  | 0.139229577  | CHAMP1                                   |
| chr8  | 62602522  | 62602643  | 122  | * | 2  | 8.96442E-08 | 0.028437966 | 0.002255478 | 0.005959108 | 0.171812575  | 0.072259827  | ASPH                                     |
| chr2  | 54198660  | 54199039  | 380  | * | 2  | 2.24848E-11 | 0.03472632  | 0.002255742 | 0.006331236 | 0.125649127  | 0.06476873   | ACYP2                                    |
| chr10 | 72983319  | 72983571  | 253  | * | 2  | 1.62819E-08 | 0.018582095 | 0.002255951 | 0.005148185 | 0.175304166  | 0.094263607  | UNC5B                                    |
| chr1  | 193074497 | 193075640 | 1144 | * | 12 | 8.50527E-26 | 0.117330432 | 0.002258214 | 0.004001195 | -0.277724529 | -0.042002148 | GLRX2                                    |
| chr22 | 29513985  | 29514072  | 88   | * | 2  | 3.72524E-10 | 0.00025666  | 0.002258739 | 0.00040488  | -0.150375245 | -0.140931157 | KREMEN1                                  |
| chr3  | 194411417 | 194411443 | 27   | * | 2  | 1.37074E-09 | 0.000856171 | 0.002258755 | 0.000975011 | 0.188689492  | 0.126576779  |                                          |
| chr17 | 16200441  | 16200581  | 141  | * | 2  | 3.42906E-11 | 0.00013618  | 0.002259436 | 0.000245347 | -0.206380572 | -0.035339304 | PIGL                                     |
| chr3  | 15328890  | 15329313  | 424  | * | 3  | 6.36945E-15 | 3.27176E-05 | 0.002259724 | 4.70442E-05 | -0.277985475 | -0.145293948 | SH3BP5                                   |
| chr10 | 81202867  | 81203244  | 378  | * | 2  | 5.67803E-10 | 0.0019779   | 0.002261243 | 0.001681938 | -0.216472574 | -0.077071692 | ZCCHC24                                  |
| chr14 | 77382482  | 77382822  | 341  | * | 2  | 1.93694E-09 | 0.001958612 | 0.00226605  | 0.001673556 | -0.271899675 | -0.091677117 |                                          |
| chr19 | 41854950  | 41855775  | 826  | * | 4  | 9.12673E-11 | 0.030422567 | 0.002266765 | 0.006637431 | 0.146143899  | 0.062264779  | TGFB1                                    |
| chr19 | 2421956   | 2422172   | 217  | * | 2  | 1.83604E-09 | 0.002234499 | 0.002267031 | 0.001813931 | 0.128179325  | 0.075847846  | TMPRSS9                                  |
| chr6  | 38123146  | 38123312  | 167  | * | 2  | 2.67509E-11 | 7.82774E-05 | 0.002269468 | 0.000155577 | -0.133369749 | -0.126439311 |                                          |

|       |           |           |      |   |    |             |             |             |             |              |              |                               |
|-------|-----------|-----------|------|---|----|-------------|-------------|-------------|-------------|--------------|--------------|-------------------------------|
| chr10 | 125805554 | 125805592 | 39   | * | 2  | 2.13449E-09 | 0.012271304 | 0.002269858 | 0.004382906 | 0.090752762  | 0.059134216  | CHST15                        |
| chr14 | 101034794 | 101035262 | 469  | * | 3  | 9.71764E-12 | 0.001553809 | 0.002270212 | 0.00143931  | -0.050941936 | 0.000774942  | BEGAIN                        |
| chr2  | 231191876 | 231192294 | 419  | * | 6  | 2.50509E-12 | 0.571314708 | 0.002271022 | 0.038683076 | -0.257608367 | -0.042859094 | SP140, SP140L                 |
| chr2  | 71291297  | 71292691  | 1395 | * | 6  | 1.6952E-24  | 1.54452E-08 | 0.00227288  | 6.05446E-08 | -0.328687348 | -0.143437397 | NAGK, AC007040.8              |
| chr7  | 55602109  | 55602372  | 264  | * | 2  | 1.74053E-13 | 3.00276E-05 | 0.002274111 | 6.81471E-05 | -0.273350188 | -0.229556349 | VOPP1                         |
| chr8  | 1692726   | 1694654   | 1929 | * | 6  | 8.97571E-22 | 6.61413E-06 | 0.002274749 | 4.60074E-06 | 0.161804819  | 0.021602251  |                               |
| chr4  | 2915985   | 2916624   | 640  | * | 4  | 1.44924E-11 | 0.004502957 | 0.002275056 | 0.002205701 | -0.277996656 | -0.106357851 | ADD1                          |
| chr8  | 37658755  | 37659174  | 420  | * | 2  | 6.89561E-12 | 0.000909588 | 0.002285309 | 0.001021102 | 0.149460672  | 0.131496499  | GPR124                        |
| chr12 | 2416089   | 2416339   | 251  | * | 2  | 1.37435E-08 | 0.014836239 | 0.002286771 | 0.00476297  | -0.238956428 | -0.101272996 | CACNA1C                       |
| chr11 | 67255424  | 67255752  | 329  | * | 3  | 2.65408E-11 | 0.020201537 | 0.002287749 | 0.002647524 | -0.145846094 | -0.037731389 | AIP                           |
| chr7  | 36639726  | 36640882  | 1157 | * | 4  | 2.72071E-15 | 0.002487953 | 0.002290807 | 0.000335434 | -0.278605004 | -0.124850802 | AOAH, AOAH-IT1                |
| chr14 | 51710280  | 51711237  | 958  | * | 4  | 2.51598E-14 | 0.002397352 | 0.00229289  | 0.000282948 | -0.21063123  | -0.013160657 | TMX1, SNORA70                 |
| chr9  | 19103992  | 19104016  | 25   | * | 3  | 2.58394E-14 | 0.000400365 | 0.002293846 | 0.000299154 | -0.157908257 | -0.089613204 |                               |
| chr10 | 44407865  | 44408207  | 343  | * | 3  | 4.22557E-11 | 0.003104983 | 0.002294241 | 0.00226407  | -0.20030323  | -0.076489455 | RP11-168P8.3                  |
| chr1  | 226841990 | 226842455 | 466  | * | 2  | 8.91726E-12 | 0.000179141 | 0.002294702 | 0.000306974 | -0.142254951 | -0.015767258 | ITPKB                         |
| chr3  | 16765888  | 16766180  | 293  | * | 2  | 1.00728E-08 | 0.004622488 | 0.002296211 | 0.002762467 | 0.190985761  | 0.076020146  |                               |
| chr1  | 145726754 | 145727016 | 263  | * | 3  | 8.51934E-10 | 0.057947293 | 0.002297295 | 0.011444504 | 0.186894655  | 0.076476102  | PDZK1                         |
| chr1  | 5942634   | 5943388   | 755  | * | 6  | 1.57187E-10 | 0.14779567  | 0.002298772 | 0.031811098 | 0.160693801  | 0.028886429  | NPHP4                         |
| chr12 | 14988018  | 14988123  | 106  | * | 2  | 1.35462E-08 | 0.002546378 | 0.002301155 | 0.001976158 | 0.222841792  | 0.141716181  | C12orf60, ART4                |
| chr8  | 145578911 | 145580093 | 1183 | * | 6  | 8.99819E-19 | 0.124348989 | 0.0023019   | 0.002765251 | -0.219330661 | -0.059654082 | SLC52A2, GS1-393G12.13, FBXL6 |
| chr9  | 137263193 | 137263731 | 539  | * | 5  | 6.72722E-20 | 0.002683399 | 0.002303273 | 4.32615E-05 | -0.283367783 | -0.147128611 | RXRA                          |
| chr2  | 28497547  | 28497868  | 322  | * | 3  | 2.78762E-08 | 0.812197377 | 0.002304546 | 0.025652792 | -0.320699497 | -0.107814333 | BRE                           |
| chr13 | 103423896 | 103424762 | 867  | * | 3  | 2.36181E-13 | 0.004362134 | 0.00230498  | 0.000403773 | -0.242700092 | -0.11723249  | TEX30                         |
| chr17 | 1371153   | 1371321   | 169  | * | 2  | 2.72769E-08 | 0.185563445 | 0.002306937 | 0.008673519 | -0.16651864  | -0.082654764 | MYO1C                         |
| chr14 | 23586582  | 23589419  | 2838 | * | 10 | 1.86035E-29 | 5.61427E-15 | 0.002308068 | 4.12374E-13 | -0.334395383 | -0.169142844 | CEBPE                         |
| chr17 | 17179362  | 17179426  | 65   | * | 3  | 8.24851E-10 | 0.00611076  | 0.002308617 | 0.002019568 | -0.214819981 | -0.114159824 | COPS3                         |
| chr16 | 2081194   | 2081446   | 253  | * | 3  | 7.87946E-13 | 0.000384816 | 0.002309137 | 0.000264236 | 0.255724853  | 0.166994344  | SLC9A3R2                      |
| chr7  | 4754502   | 4755415   | 914  | * | 9  | 2.58137E-46 | 8.27681E-17 | 0.00230968  | 2.50791E-14 | -0.287816252 | -0.200234428 | FOXK1                         |
| chr10 | 106053665 | 106054220 | 556  | * | 3  | 1.53918E-09 | 0.178231659 | 0.002314179 | 0.017996943 | 0.165209215  | 0.060030653  | GSTO2                         |

|       |           |           |      |   |    |             |             |             |             |              |              |                          |
|-------|-----------|-----------|------|---|----|-------------|-------------|-------------|-------------|--------------|--------------|--------------------------|
| chr4  | 175205044 | 175206750 | 1707 | * | 11 | 4.01927E-21 | 0.118729646 | 0.002314845 | 0.020148512 | -0.369473425 | -0.040612586 | CEP44, FBXO8             |
| chr19 | 6886467   | 6887544   | 1078 | * | 6  | 4.31879E-14 | 0.006482307 | 0.002314962 | 0.000201757 | -0.224834632 | -0.074193162 |                          |
| chr13 | 21578684  | 21579100  | 417  | * | 5  | 2.07876E-15 | 0.001020875 | 0.002317775 | 0.000297843 | -0.20073421  | -0.096680517 | LATS2                    |
| chr5  | 73181670  | 73181701  | 32   | * | 2  | 3.44389E-08 | 0.008974662 | 0.002318453 | 0.003867524 | -0.231203592 | -0.144481676 | ARHGEF28                 |
| chr7  | 30952730  | 30953124  | 395  | * | 3  | 1.06402E-09 | 0.024812753 | 0.002320085 | 0.007599048 | 0.159637342  | 0.075140332  | AQP1, AQP1               |
| chr1  | 24239771  | 24239820  | 50   | * | 2  | 5.76463E-08 | 0.001313855 | 0.002320746 | 0.001313673 | -0.106449363 | -0.078218388 | CNR2                     |
| chr4  | 4323012   | 4323632   | 621  | * | 4  | 3.08367E-11 | 0.136044357 | 0.002321631 | 0.004143982 | 0.207097808  | 0.096643073  | ZBTB49                   |
| chr10 | 134399880 | 134401153 | 1274 | * | 8  | 1.7067E-21  | 8.84774E-07 | 0.002323774 | 2.39685E-06 | -0.299583706 | -0.021945884 | INPP5A                   |
| chr1  | 100543333 | 100543434 | 102  | * | 2  | 9.16181E-08 | 0.019762327 | 0.002324162 | 0.005376035 | 0.113677887  | 0.066790364  | HIAT1, RP4-714D9.2       |
| chr1  | 26395442  | 26395951  | 510  | * | 3  | 2.23065E-09 | 0.076941283 | 0.002324399 | 0.01242417  | 0.159293253  | 0.057398627  |                          |
| chr22 | 38965411  | 38967436  | 2026 | * | 13 | 1.13382E-15 | 0.111397934 | 0.002329569 | 0.002464779 | -0.241056485 | -0.002269729 | DMC1                     |
| chr19 | 38812379  | 38812803  | 425  | * | 3  | 7.43377E-13 | 0.000573621 | 0.00232969  | 0.00039779  | 0.172749325  | 0.125486124  | KCNK6                    |
| chr1  | 8931135   | 8932359   | 1225 | * | 7  | 2.94308E-26 | 1.1437E-08  | 0.002329981 | 2.0551E-08  | -0.379019416 | -0.153568222 | ENO1                     |
| chr14 | 65204509  | 65204625  | 117  | * | 3  | 6.47816E-10 | 0.015046675 | 0.002330532 | 0.00255224  | -0.115135613 | -0.070287366 | PLEKHG3                  |
| chr19 | 16423883  | 16424005  | 123  | * | 2  | 1.25547E-07 | 0.045907564 | 0.002331266 | 0.00700155  | -0.232358583 | -0.117937419 | CTD-2562J15.6            |
| chr22 | 41487569  | 41487761  | 193  | * | 4  | 9.68649E-10 | 0.06297828  | 0.002332353 | 0.010927004 | 0.030146807  | 0.015831194  |                          |
| chr16 | 4102293   | 4105170   | 2878 | * | 15 | 6.45612E-22 | 0.00096388  | 0.002332418 | 7.59613E-06 | -0.304866315 | -0.098929461 | ADCY9                    |
| chr20 | 55949676  | 55949957  | 282  | * | 3  | 1.56562E-15 | 4.00825E-06 | 0.002333367 | 1.32215E-05 | -0.231075199 | -0.126434291 | RAE1                     |
| chr17 | 80180987  | 80181015  | 29   | * | 2  | 7.09034E-14 | 3.34759E-05 | 0.00233545  | 7.53223E-05 | -0.311441217 | -0.290906975 |                          |
| chr15 | 77280925  | 77281418  | 494  | * | 3  | 6.49568E-13 | 0.000204882 | 0.002336663 | 0.000209988 | -0.184510074 | -0.111455618 |                          |
| chr4  | 737453    | 738199    | 747  | * | 5  | 3.0959E-13  | 0.026638264 | 0.002336891 | 0.003311496 | -0.240405422 | -0.08015487  | PCGF3                    |
| chr5  | 148807759 | 148810203 | 2445 | * | 12 | 3.57101E-18 | 0.00027477  | 0.002337863 | 2.44221E-06 | -0.18927771  | -0.07889999  | MIR143HG, MIR143, MIR145 |
| chr19 | 14785593  | 14785849  | 257  | * | 5  | 9.97355E-17 | 0.000421394 | 0.002338127 | 5.13489E-05 | -0.058209119 | -0.03258666  | EMR3                     |
| chr16 | 85551478  | 85552230  | 753  | * | 4  | 6.18558E-19 | 3.54535E-05 | 0.002339793 | 1.12624E-05 | 0.210984873  | 0.141328001  |                          |
| chr7  | 137621009 | 137621198 | 190  | * | 2  | 2.81694E-08 | 0.06025782  | 0.002341436 | 0.007489284 | -0.247475087 | -0.119812243 | CREB3L2                  |
| chr14 | 77249068  | 77249073  | 6    | * | 2  | 5.47674E-10 | 0.002134847 | 0.002342295 | 0.001793025 | 0.170550019  | 0.102535575  | VASH1, RP11-488C13.5     |
| chr6  | 33389072  | 33389696  | 625  | * | 4  | 2.67898E-16 | 0.003039451 | 0.002343583 | 0.000364329 | 0.203738147  | 0.102681745  | SYNGAP1                  |
| chr8  | 142179603 | 142181089 | 1487 | * | 11 | 1.94823E-25 | 0.000447246 | 0.00234565  | 9.01548E-05 | -0.343998093 | -0.03282086  | DENND3                   |
| chr3  | 141056124 | 141056238 | 115  | * | 2  | 7.64132E-12 | 4.34082E-05 | 0.002351134 | 9.46522E-05 | 0.185396975  | 0.17090612   | ZBTB38, RP11-438D8.2     |

|       |           |           |      |   |    |             |             |             |             |              |              |                      |
|-------|-----------|-----------|------|---|----|-------------|-------------|-------------|-------------|--------------|--------------|----------------------|
| chr2  | 7171869   | 7172724   | 856  | * | 9  | 9.45489E-37 | 1.22843E-09 | 0.002352021 | 1.48938E-09 | -0.32087044  | -0.123422823 | RNF144A              |
| chr8  | 33397227  | 33397536  | 310  | * | 4  | 5.61259E-15 | 0.000446668 | 0.002354757 | 0.000199414 | 0.142740487  | 0.040521335  |                      |
| chr16 | 3843012   | 3843415   | 404  | * | 5  | 7.5707E-14  | 0.035816123 | 0.002356599 | 0.001334615 | 0.218646796  | 0.087021793  | CREBBP               |
| chr15 | 22920060  | 22920168  | 109  | * | 2  | 2.24921E-08 | 0.067930022 | 0.002358217 | 0.007722156 | 0.162525601  | 0.079612952  | CYFIP1               |
| chr5  | 177929808 | 177929948 | 141  | * | 2  | 7.49466E-08 | 0.016201682 | 0.00236182  | 0.00504045  | -0.171156888 | -0.070972524 | COL23A1              |
| chr17 | 517799    | 518485    | 687  | * | 2  | 9.65101E-11 | 7.05884E-05 | 0.002364131 | 0.000143846 | -0.235851775 | -0.165630976 | VPS53                |
| chr22 | 43327098  | 43327600  | 503  | * | 3  | 1.55097E-13 | 0.002178596 | 0.002367594 | 0.000315088 | -0.193401182 | -0.123239228 | PACSIN2              |
| chr22 | 18452721  | 18453180  | 460  | * | 2  | 8.84961E-12 | 3.31952E-05 | 0.002370841 | 7.49484E-05 | 0.168162692  | 0.148754925  | MICAL3               |
| chr22 | 51042356  | 51042761  | 406  | * | 2  | 5.795E-11   | 0.001546581 | 0.002371126 | 0.001474029 | 0.079307292  | 0.064275678  | MAPK8IP2             |
| chr15 | 38987310  | 38988560  | 1251 | * | 5  | 3.45088E-18 | 0.081269341 | 0.002372059 | 0.002171207 | 0.215060101  | 0.059998017  |                      |
| chr6  | 2784576   | 2784588   | 13   | * | 2  | 3.92581E-13 | 3.53391E-05 | 0.002372166 | 7.91992E-05 | 0.090143716  | 0.088549388  | WRNIP1               |
| chr8  | 23351369  | 23351994  | 626  | * | 5  | 3.57944E-22 | 3.86876E-08 | 0.002377594 | 2.61639E-07 | 0.178951148  | 0.136242324  | CTC-756D1.3          |
| chr16 | 4819304   | 4819632   | 329  | * | 2  | 8.32079E-09 | 0.047155708 | 0.00237873  | 0.007158591 | -0.199851589 | -0.105216604 |                      |
| chr21 | 36398056  | 36398338  | 283  | * | 2  | 1.4557E-14  | 3.39306E-05 | 0.002382653 | 7.64707E-05 | -0.177122938 | -0.142581398 | RUNX1                |
| chr8  | 123629859 | 123630361 | 503  | * | 2  | 3.12229E-11 | 8.62101E-05 | 0.002383477 | 0.000170539 | -0.27898584  | -0.084712223 |                      |
| chr2  | 235949554 | 235949598 | 45   | * | 2  | 1.34911E-08 | 0.006600734 | 0.002385831 | 0.003394833 | -0.146555462 | -0.093532559 | SH3BP4               |
| chr15 | 81317493  | 81317622  | 130  | * | 2  | 2.7444E-08  | 0.007466407 | 0.002389602 | 0.003610679 | -0.264635431 | -0.146678061 | C15orf26             |
| chr17 | 57410172  | 57410687  | 516  | * | 2  | 1.59744E-11 | 0.002264819 | 0.00239138  | 0.001877761 | -0.09007609  | -0.058285555 | YPEL2                |
| chr12 | 125188554 | 125189190 | 637  | * | 2  | 2.34798E-10 | 0.000334311 | 0.00239383  | 0.000504835 | -0.35194921  | -0.195457636 |                      |
| chr15 | 58430391  | 58430682  | 292  | * | 4  | 4.24024E-09 | 0.615482512 | 0.002393999 | 0.046212535 | -0.351136083 | -0.083732058 | AQP9, ALDH1A2        |
| chr5  | 139040546 | 139041014 | 469  | * | 5  | 2.25045E-16 | 1.1464E-05  | 0.002397329 | 3.84725E-05 | -0.08595207  | -0.062020305 | CXXC5                |
| chr10 | 5987662   | 5988276   | 615  | * | 7  | 2.77668E-23 | 7.04282E-07 | 0.002397438 | 8.1736E-07  | -0.275416726 | -0.089434452 | RP11-536K7.3         |
| chr2  | 219030123 | 219031719 | 1597 | * | 6  | 3.16378E-12 | 0.030530183 | 0.002397825 | 0.001027243 | -0.21481021  | -0.080169153 | CXCR1                |
| chr1  | 235100100 | 235100790 | 691  | * | 3  | 4.11007E-12 | 0.001041095 | 0.002401999 | 0.001015275 | 0.192408179  | 0.122803914  | RP11-443B7.1         |
| chr5  | 124063914 | 124064481 | 568  | * | 4  | 2.74873E-09 | 0.220422062 | 0.002406444 | 0.027298096 | 0.162013111  | 0.038700377  | ZNF608               |
| chr11 | 70256556  | 70258111  | 1556 | * | 7  | 7.6472E-21  | 0.000166158 | 0.002406742 | 2.03328E-05 | 0.214695891  | 0.050057224  | CTTN                 |
| chr3  | 148446876 | 148448256 | 1381 | * | 7  | 4.88602E-14 | 0.040284176 | 0.002407414 | 0.004483948 | -0.167436141 | -0.047247374 | AGTR1                |
| chr8  | 144654887 | 144656271 | 1385 | * | 13 | 5.57616E-36 | 0.000173894 | 0.00240855  | 1.53242E-06 | -0.304911952 | -0.102633408 | RP11-661A12.9, MROH6 |
| chr11 | 109952914 | 109953349 | 436  | * | 2  | 3.41062E-11 | 9.69406E-05 | 0.002410238 | 0.000188571 | -0.223480277 | -0.035625687 |                      |

|       |           |           |      |   |    |             |             |             |             |              |              |                     |
|-------|-----------|-----------|------|---|----|-------------|-------------|-------------|-------------|--------------|--------------|---------------------|
| chr5  | 127194101 | 127194369 | 269  | * | 3  | 1.95492E-09 | 0.019002251 | 0.002410784 | 0.006033353 | -0.148802424 | -0.035444357 | CTC-228N24.1        |
| chr16 | 84223350  | 84223841  | 492  | * | 3  | 6.26334E-14 | 0.001786807 | 0.002412115 | 0.001633534 | -0.212127297 | -0.094458234 |                     |
| chr10 | 51574776  | 51575388  | 613  | * | 2  | 2.63377E-11 | 0.161146485 | 0.002413164 | 0.008908393 | -0.265162547 | -0.134560578 | NCOA4               |
| chr20 | 47340424  | 47341147  | 724  | * | 3  | 4.24731E-15 | 0.006059088 | 0.002413886 | 0.00023932  | -0.245160631 | -0.135934999 | PREX1               |
| chr1  | 162287718 | 162288210 | 493  | * | 3  | 6.09867E-14 | 0.000336797 | 0.002414445 | 0.000186862 | -0.23506492  | -0.139603923 | NOS1AP              |
| chr11 | 10476242  | 10477461  | 1220 | * | 10 | 4.68769E-37 | 2.42204E-06 | 0.002416716 | 1.97657E-08 | -0.285275141 | -0.102560444 | AMPD3               |
| chr12 | 1212226   | 1212255   | 30   | * | 2  | 3.86787E-13 | 6.2051E-05  | 0.002416945 | 0.000129481 | -0.22927808  | -0.183731881 | ERC1                |
| chr3  | 52124234  | 52124791  | 558  | * | 3  | 1.16559E-13 | 0.000803188 | 0.002417647 | 0.000255662 | 0.22045367   | 0.135402251  | POC1A               |
| chr6  | 35993792  | 35994020  | 229  | * | 2  | 1.10309E-08 | 0.086464745 | 0.002421026 | 0.008245995 | -0.149475756 | -0.072792496 |                     |
| chr2  | 238990085 | 238990731 | 647  | * | 8  | 4.37447E-19 | 0.023096685 | 0.002423454 | 0.001234879 | 0.146172787  | 0.040285727  | UBE2F-SCLY, SCLY    |
| chr3  | 171845173 | 171845883 | 711  | * | 2  | 1.30215E-10 | 4.94868E-05 | 0.00242628  | 0.000106656 | -0.186776549 | -0.155953462 | FNDC3B              |
| chr1  | 6662478   | 6663269   | 792  | * | 6  | 1.48099E-15 | 0.008608143 | 0.002431193 | 0.002196381 | 0.044115119  | 0.00975601   | KLHL21              |
| chr9  | 100991448 | 100991672 | 225  | * | 3  | 1.5083E-08  | 0.204731834 | 0.002431846 | 0.019373529 | -0.310056098 | -0.090542531 | TBC1D2              |
| chr7  | 642127    | 643155    | 1029 | * | 6  | 2.37226E-25 | 3.33259E-05 | 0.002434651 | 5.78613E-06 | 0.194170383  | 0.095054988  | AC147651.4, PRKAR1B |
| chr2  | 25427064  | 25427652  | 589  | * | 6  | 1.21263E-11 | 0.09608336  | 0.002435289 | 0.018884641 | -0.147166396 | -0.033742629 | AC012457.2          |
| chr6  | 29705436  | 29706377  | 942  | * | 5  | 1.84952E-17 | 0.004262447 | 0.002440797 | 0.000176823 | -0.261742736 | -0.079952213 | HLA-F, HLA-F-AS1    |
| chr21 | 45140424  | 45140931  | 508  | * | 3  | 6.33243E-11 | 0.002075752 | 0.002446843 | 0.001767152 | -0.104355494 | -0.060280955 | PDXK                |
| chr7  | 135368563 | 135369001 | 439  | * | 2  | 1.87165E-10 | 0.000278703 | 0.002449456 | 0.000442436 | -0.282784825 | -0.067798671 | C7orf73, SLC13A4    |
| chr10 | 129172498 | 129172573 | 76   | * | 3  | 7.35719E-16 | 1.69553E-06 | 0.002452796 | 7.14372E-06 | 0.17324093   | 0.148168651  | DOCK1               |
| chr17 | 80266884  | 80267099  | 216  | * | 4  | 8.8427E-15  | 0.000646694 | 0.002452821 | 9.60009E-05 | 0.181451752  | 0.109505348  |                     |
| chr9  | 139592589 | 139593588 | 1000 | * | 3  | 1.04087E-10 | 0.002018356 | 0.002454013 | 0.000551067 | -0.21219557  | -0.10329193  |                     |
| chr17 | 57889637  | 57889850  | 214  | * | 2  | 1.38438E-08 | 0.004518776 | 0.002456681 | 0.002833715 | -0.258961282 | -0.160913458 | VMP1                |
| chr6  | 140371491 | 140371628 | 138  | * | 2  | 2.80953E-08 | 0.00569761  | 0.002458827 | 0.00320587  | 0.165679017  | 0.025539202  |                     |
| chr9  | 33473445  | 33474350  | 906  | * | 12 | 2.69489E-19 | 0.091967334 | 0.002460525 | 0.008245766 | -0.029059023 | 0.000170429  | NOL6                |
| chr8  | 71381070  | 71381216  | 147  | * | 3  | 2.95555E-11 | 0.007595453 | 0.002461915 | 0.001309803 | -0.243143846 | -0.146150606 |                     |
| chr16 | 3173975   | 3174915   | 941  | * | 8  | 5.15761E-19 | 0.02588937  | 0.0024622   | 0.000105359 | 0.0238005    | 0.002823596  | RP11-473M20.14      |
| chr16 | 1537775   | 1539318   | 1544 | * | 11 | 7.59406E-32 | 0.006273047 | 0.002468015 | 6.34183E-06 | -0.290105776 | -0.10505748  | PTX4                |
| chr14 | 91862813  | 91862907  | 95   | * | 4  | 1.8257E-08  | 0.241920841 | 0.002469723 | 0.022977542 | -0.21090882  | -0.062757023 | CCDC88C             |
| chr15 | 101714939 | 101715819 | 881  | * | 6  | 2.44479E-11 | 0.215168449 | 0.002469832 | 0.02202208  | -0.205395608 | -0.045255044 |                     |

|       |           |           |      |   |    |             |             |             |             |              |              |                                 |
|-------|-----------|-----------|------|---|----|-------------|-------------|-------------|-------------|--------------|--------------|---------------------------------|
| chr9  | 127273296 | 127273395 | 100  | * | 2  | 9.05875E-08 | 0.006258034 | 0.002471797 | 0.00337426  | 0.167286781  | 0.069094057  |                                 |
| chr19 | 41920834  | 41921140  | 307  | * | 4  | 1.42578E-11 | 0.002687355 | 0.002471946 | 0.002217375 | -0.284157411 | -0.099283821 | CTC-435M10.3, BCKDHA            |
| chr3  | 10334546  | 10335844  | 1299 | * | 8  | 1.5924E-18  | 0.00384367  | 0.002472678 | 0.000939635 | -0.214006035 | -0.049903112 | GHRLOS, GHRL, SEC13             |
| chr1  | 161059411 | 161060622 | 1212 | * | 8  | 1.25873E-22 | 4.76508E-05 | 0.002472843 | 5.54677E-05 | -0.246616477 | -0.010295605 |                                 |
| chr5  | 176972593 | 176972809 | 217  | * | 2  | 3.23279E-09 | 0.000998585 | 0.002480403 | 0.001125859 | -0.186163725 | -0.111017368 | FAM193B                         |
| chr17 | 42410950  | 42411197  | 248  | * | 2  | 3.19965E-12 | 4.00461E-05 | 0.002481451 | 8.905E-05   | -0.231249938 | -0.199295925 |                                 |
| chr5  | 67562753  | 67563114  | 362  | * | 2  | 4.65798E-10 | 0.000426097 | 0.002481691 | 0.000613166 | -0.223546684 | -0.173506534 | PIK3R1                          |
| chr11 | 120811322 | 120811938 | 617  | * | 2  | 1.32591E-10 | 0.000158046 | 0.002482649 | 0.000283665 | 0.14102213   | 0.116477261  | GRIK4                           |
| chr19 | 3179364   | 3180035   | 672  | * | 5  | 1.58957E-13 | 0.028659219 | 0.002483472 | 0.004134228 | -0.114385071 | -0.038865735 | S1PR4                           |
| chr15 | 101566796 | 101567894 | 1099 | * | 3  | 4.80762E-13 | 0.001962533 | 0.002484873 | 0.001612868 | 0.090556298  | 0.051534659  | LRRK1                           |
| chr17 | 19290353  | 19291768  | 1416 | * | 10 | 2.32977E-31 | 1.20976E-07 | 0.002485378 | 8.2686E-08  | -0.154608144 | -0.064397084 | MFAP4                           |
| chr2  | 235878176 | 235878276 | 101  | * | 2  | 1.26829E-09 | 0.001031044 | 0.002485571 | 0.001151611 | 0.104246148  | 0.089392455  | SH3BP4                          |
| chr2  | 187420032 | 187420141 | 110  | * | 2  | 8.6922E-08  | 0.012783866 | 0.002487463 | 0.004733307 | 0.155536748  | 0.094767823  |                                 |
| chr20 | 18490820  | 18491545  | 726  | * | 6  | 3.40275E-22 | 0.00022031  | 0.002490113 | 2.56136E-05 | -0.282197999 | -0.132366351 | SEC23B                          |
| chr12 | 122234980 | 122235560 | 581  | * | 5  | 3.58208E-16 | 0.000350557 | 0.002493744 | 0.000129233 | 0.214494291  | 0.095245543  | RP11-347119.8, RHOF, AC084018.1 |
| chr2  | 191885762 | 191886753 | 992  | * | 5  | 2.05592E-12 | 0.018607583 | 0.002497986 | 0.005148167 | -0.210679053 | -0.047522377 | AC067945.4                      |
| chr15 | 51659419  | 51659538  | 120  | * | 3  | 1.91879E-08 | 0.445080448 | 0.0025002   | 0.020967573 | -0.243922931 | -0.083954159 | GLDN                            |
| chr8  | 134306801 | 134307728 | 928  | * | 4  | 2.33303E-18 | 1.89428E-05 | 0.002501204 | 7.99434E-06 | -0.255086213 | -0.152335273 | NDRG1                           |
| chr4  | 38138950  | 38139045  | 96   | * | 2  | 3.63276E-08 | 0.005632699 | 0.002501596 | 0.003218527 | -0.177352879 | -0.098170504 | TBC1D1                          |
| chr8  | 56684606  | 56684895  | 290  | * | 3  | 1.37071E-13 | 0.001201346 | 0.002505126 | 0.001025661 | 0.12330408   | 0.061191822  | TMEM68                          |
| chr11 | 64481018  | 64481499  | 482  | * | 4  | 6.8343E-13  | 0.00120765  | 0.002509437 | 0.001286536 | 0.044266358  | 0.009922119  | NRXN2                           |
| chr12 | 117174227 | 117175042 | 816  | * | 4  | 9.99816E-15 | 0.01137701  | 0.002511229 | 0.00114421  | -0.183438291 | -0.037370935 | C12orf49                        |
| chr20 | 48658164  | 48658258  | 95   | * | 4  | 1.28904E-14 | 0.000446627 | 0.00251175  | 0.000125429 | -0.256278106 | -0.130584997 |                                 |
| chr7  | 157092682 | 157093534 | 853  | * | 5  | 1.62566E-18 | 0.000822562 | 0.002513863 | 5.53062E-05 | -0.160301081 | -0.061441499 |                                 |
| chr17 | 34207332  | 34208154  | 823  | * | 7  | 1.17393E-18 | 0.000102622 | 0.002514206 | 3.21885E-05 | 0.135370468  | 0.082417525  | AC015849.2, CCL5                |
| chr17 | 16319861  | 16320257  | 397  | * | 2  | 1.20511E-08 | 0.054439205 | 0.00251762  | 0.007744419 | 0.168873173  | 0.08020155   | TRPV2                           |
| chr17 | 78444511  | 78444702  | 192  | * | 3  | 3.59888E-08 | 0.037924678 | 0.002518726 | 0.009789946 | 0.117062372  | 0.053367822  | NPTX1                           |
| chr19 | 10792615  | 10793130  | 516  | * | 6  | 5.31727E-14 | 0.088770276 | 0.002519024 | 0.006091997 | -0.165249628 | -0.019430849 | ILF3                            |
| chr14 | 52333121  | 52333365  | 245  | * | 2  | 1.59158E-08 | 0.003824915 | 0.002519461 | 0.002620392 | -0.261716775 | -0.111890251 | GNG2                            |

|       |           |           |      |   |    |             |             |             |             |              |              |                                  |
|-------|-----------|-----------|------|---|----|-------------|-------------|-------------|-------------|--------------|--------------|----------------------------------|
| chr4  | 84407534  | 84407894  | 361  | * | 2  | 6.73086E-10 | 0.001314482 | 0.002519907 | 0.001362876 | -0.144292545 | -0.08403512  | FAM175A                          |
| chr20 | 61492204  | 61492669  | 466  | * | 2  | 5.2338E-11  | 0.002791119 | 0.002524373 | 0.002186884 | 0.056558348  | 0.041900587  | TCFL5                            |
| chr3  | 108800810 | 108800886 | 77   | * | 2  | 7.42659E-08 | 0.008733753 | 0.002524724 | 0.004024781 | 0.119074699  | 0.084597825  | MORC1                            |
| chr15 | 55513621  | 55513769  | 149  | * | 2  | 1.32503E-10 | 0.000139992 | 0.002524964 | 0.000258179 | -0.132678219 | -0.100933019 | RAB27A                           |
| chr20 | 48410517  | 48411590  | 1074 | * | 4  | 1.33143E-10 | 0.021908838 | 0.00253236  | 0.00056261  | -0.237581048 | -0.114701966 | RNU6-919P                        |
| chr7  | 97912149  | 97912641  | 493  | * | 2  | 2.73443E-10 | 0.001704014 | 0.002533709 | 0.001616886 | -0.127734646 | -0.099805848 | BRI3                             |
| chr9  | 139590572 | 139590683 | 112  | * | 2  | 8.69845E-08 | 0.019784113 | 0.002535891 | 0.005711502 | -0.161706433 | -0.076232553 |                                  |
| chr12 | 121123557 | 121124624 | 1068 | * | 6  | 9.91728E-17 | 0.000644688 | 0.00253898  | 0.000240703 | -0.164169466 | -0.012726181 |                                  |
| chr2  | 240142589 | 240147161 | 4573 | * | 12 | 1.29523E-25 | 3.91311E-13 | 0.002545123 | 6.70586E-13 | -0.281716717 | -0.1186558   | HDAC4                            |
| chr2  | 262323    | 262646    | 324  | * | 2  | 5.4428E-11  | 0.000320036 | 0.00255104  | 0.000498391 | 0.125954186  | 0.112055175  | SH3YL1                           |
| chr9  | 126061965 | 126062469 | 505  | * | 2  | 4.74361E-10 | 0.000535038 | 0.002555328 | 0.000732839 | 0.163665338  | 0.122025432  |                                  |
| chr16 | 85449409  | 85449611  | 203  | * | 2  | 5.36754E-11 | 9.83653E-05 | 0.00255915  | 0.000193503 | 0.175458085  | 0.158421089  |                                  |
| chr2  | 113884734 | 113885277 | 544  | * | 3  | 3.60982E-14 | 0.000649766 | 0.002561345 | 0.000397131 | -0.241552172 | -0.101654504 | IL1RN                            |
| chr1  | 159172927 | 159174610 | 1684 | * | 7  | 3.62937E-25 | 4.79088E-06 | 0.00256317  | 4.48602E-07 | -0.291353434 | 0.025217577  | CADM3, DARC, CTA-134P22.2        |
| chr10 | 104403435 | 104405343 | 1909 | * | 9  | 7.11056E-26 | 2.61953E-05 | 0.002563666 | 7.25564E-07 | 0.033645205  | 0.012603454  | TRIM8, RP11-47A8.5               |
| chr17 | 57440029  | 57440226  | 198  | * | 2  | 4.55345E-11 | 8.79317E-05 | 0.002567353 | 0.000176251 | 0.199241711  | 0.18397394   | YPEL2                            |
| chr20 | 11898851  | 11900410  | 1560 | * | 6  | 4.08584E-19 | 0.000441396 | 0.00256955  | 2.24625E-05 | 0.145484419  | 0.080204306  | BTBD3, RP4-742J24.2              |
| chr9  | 100881995 | 100883593 | 1599 | * | 5  | 2.57358E-18 | 8.49718E-05 | 0.002570052 | 1.21623E-05 | -0.213641379 | -0.124608278 | CORO2A                           |
| chr14 | 69448184  | 69448387  | 204  | * | 2  | 3.53466E-10 | 0.00063165  | 0.002571834 | 0.000828568 | 0.181903625  | 0.115814053  | ACTN1-AS1                        |
| chr2  | 60441042  | 60441246  | 205  | * | 2  | 1.06393E-11 | 5.42005E-05 | 0.002574656 | 0.000116661 | -0.200408189 | -0.1186917   |                                  |
| chr15 | 43531947  | 43532243  | 297  | * | 3  | 3.52707E-15 | 9.08437E-06 | 0.002574715 | 2.97235E-05 | -0.169126965 | -0.117968477 | TGM5                             |
| chr2  | 15317374  | 15317393  | 20   | * | 2  | 1.99111E-08 | 0.002295282 | 0.002576985 | 0.00196373  | 0.090228952  | 0.080624164  | NBAS                             |
| chr18 | 55317649  | 55317652  | 4    | * | 2  | 4.18512E-13 | 7.61831E-05 | 0.002577387 | 0.000156246 | -0.149606457 | -0.139889692 | RP11-35G9.3, RP11-35G9.5, ATP8B1 |
| chr16 | 86018680  | 86018936  | 257  | * | 2  | 3.26684E-10 | 0.000289185 | 0.002577516 | 0.000462442 | -0.201690553 | -0.122324435 |                                  |
| chr5  | 150476928 | 150477744 | 817  | * | 2  | 3.37863E-10 | 3.91868E-05 | 0.002577894 | 8.79253E-05 | -0.299139045 | -0.220586388 |                                  |
| chr1  | 33515863  | 33516627  | 765  | * | 4  | 7.31326E-11 | 0.005389956 | 0.002580133 | 0.002790804 | -0.340294915 | -0.085137283 | AK2                              |
| chr2  | 169925400 | 169926103 | 704  | * | 5  | 1.47411E-16 | 0.000743168 | 0.002581367 | 0.000255152 | -0.296878941 | -0.11243022  | DHRS9                            |
| chr7  | 75947745  | 75948532  | 788  | * | 4  | 4.78169E-16 | 0.00177709  | 0.002587384 | 0.000744192 | 0.18067342   | 0.016342253  |                                  |
| chr15 | 80189128  | 80190631  | 1504 | * | 14 | 2.81069E-29 | 0.001183826 | 0.002587573 | 0.000163049 | -0.254060396 | -0.058005759 | MTHFS, ST20-MTHFS                |

|       |           |           |      |   |    |             |             |             |             |              |              |                        |
|-------|-----------|-----------|------|---|----|-------------|-------------|-------------|-------------|--------------|--------------|------------------------|
| chr7  | 134853645 | 134855206 | 1562 | * | 10 | 1.26301E-33 | 5.84774E-05 | 0.002587988 | 2.4205E-06  | -0.273337735 | -0.068892891 | RP11-134L10.1, C7orf49 |
| chr4  | 15691786  | 15693171  | 1386 | * | 5  | 4.03837E-13 | 6.7415E-06  | 0.002588913 | 4.535E-06   | -0.222523004 | -0.08242654  | FAM200B                |
| chr8  | 134203235 | 134203841 | 607  | * | 7  | 6.96313E-26 | 7.50854E-07 | 0.002589378 | 9.31338E-07 | 0.219982018  | 0.095823313  | WISP1                  |
| chr2  | 171783942 | 171785822 | 1881 | * | 19 | 4.16814E-28 | 0.007037505 | 0.002591211 | 0.001542237 | -0.368284205 | -0.042373717 | GORASP2                |
| chr11 | 16809233  | 16809606  | 374  | * | 2  | 3.94714E-10 | 0.001135991 | 0.002591771 | 0.001251498 | -0.162450654 | -0.042945829 | PLEKHA7                |
| chr16 | 30775137  | 30775658  | 522  | * | 3  | 2.75563E-11 | 0.05334644  | 0.002593034 | 0.011552632 | -0.218215088 | -0.080341612 | RNF40                  |
| chr1  | 156478347 | 156478934 | 588  | * | 3  | 9.24372E-15 | 0.003565898 | 0.002595141 | 0.000261337 | -0.134531865 | 0.0019279    |                        |
| chr15 | 63050387  | 63051004  | 618  | * | 5  | 2.57814E-11 | 0.014399819 | 0.002597383 | 0.00562634  | -0.239061317 | -0.043939857 | TLN2                   |
| chr1  | 156119420 | 156119773 | 354  | * | 5  | 1.47511E-17 | 0.000598493 | 0.002597714 | 6.40574E-05 | -0.261854525 | -0.101463359 | SEMA4A                 |
| chr16 | 1608794   | 1609908   | 1115 | * | 8  | 9.51402E-20 | 0.007625333 | 0.002598242 | 0.001215751 | -0.371166863 | -0.058304046 | IFT140                 |
| chr1  | 28856281  | 28857093  | 813  | * | 4  | 2.66052E-16 | 1.20943E-05 | 0.002599063 | 4.0126E-05  | -0.258684271 | -0.01001039  | RCC1                   |
| chr6  | 37224216  | 37225644  | 1429 | * | 11 | 4.54732E-27 | 0.008848831 | 0.002601655 | 0.000590446 | -0.222402266 | -0.048948867 | TBC1D22B, TMEM217      |
| chr1  | 85742205  | 85742698  | 494  | * | 5  | 2.70575E-15 | 0.002365544 | 0.002604277 | 0.001119795 | 0.027236025  | 0.004709826  | RP11-131L23.1, BCL10   |
| chr13 | 95254690  | 95255258  | 569  | * | 2  | 1.07876E-12 | 0.001112269 | 0.002612864 | 0.001238    | -0.190346319 | -0.082497725 | GPR180                 |
| chr1  | 206970717 | 206971646 | 930  | * | 4  | 4.24568E-17 | 0.000238362 | 0.002613618 | 9.42494E-05 | -0.363860574 | -0.124764594 |                        |
| chr14 | 92324826  | 92325159  | 334  | * | 2  | 1.25286E-11 | 4.84025E-05 | 0.002615159 | 0.000106041 | 0.157630916  | 0.040347818  | TC2N                   |
| chr2  | 40658891  | 40658918  | 28   | * | 2  | 5.73183E-10 | 0.000874188 | 0.002623196 | 0.001050945 | -0.226262965 | -0.1378293   | SLC8A1                 |
| chr1  | 150939564 | 150939602 | 39   | * | 2  | 4.74198E-08 | 0.102585506 | 0.00262467  | 0.009049376 | 0.153029388  | 0.07543082   | CERS2                  |
| chr2  | 169770161 | 169770254 | 94   | * | 2  | 7.22657E-09 | 0.100568137 | 0.002624828 | 0.009022427 | -0.174635404 | -0.090975367 |                        |
| chr16 | 82096585  | 82096624  | 40   | * | 3  | 1.5172E-13  | 8.18445E-05 | 0.002625382 | 9.59649E-05 | -0.193836678 | -0.131082743 | HSD17B2, RP11-510J16.5 |
| chr2  | 239195537 | 239195602 | 66   | * | 2  | 2.07816E-08 | 0.009655351 | 0.002627877 | 0.00432396  | -0.127264097 | -0.074476439 | PER2                   |
| chr12 | 133340907 | 133340965 | 59   | * | 2  | 4.11738E-12 | 6.3595E-05  | 0.002628042 | 0.000134422 | 0.118544782  | 0.090950265  |                        |
| chr6  | 42891866  | 42892367  | 502  | * | 2  | 2.11264E-14 | 0.000128196 | 0.002630951 | 0.000242648 | 0.164447218  | 0.14263751   | PTCRA                  |
| chr9  | 34374990  | 34375053  | 64   | * | 2  | 6.55428E-08 | 0.050236125 | 0.002632427 | 0.007859028 | -0.18995149  | -0.088028236 | KIAA1161               |
| chr12 | 54324491  | 54324895  | 405  | * | 5  | 8.33998E-11 | 0.010216775 | 0.002638224 | 0.004990027 | 0.065068437  | 0.026850645  |                        |
| chr13 | 114912269 | 114912327 | 59   | * | 2  | 3.2015E-11  | 0.000818058 | 0.002639732 | 0.001005776 | 0.093290885  | 0.080983969  |                        |
| chr3  | 123411782 | 123412055 | 274  | * | 3  | 2.42494E-12 | 0.015105484 | 0.002642961 | 0.000878449 | 0.155153248  | 0.098878836  | MYLK                   |
| chr19 | 51728379  | 51728586  | 208  | * | 2  | 1.99948E-09 | 0.06223945  | 0.002643962 | 0.008294678 | -0.056230371 | -0.025215461 | CD33                   |
| chr3  | 127473259 | 127473936 | 678  | * | 4  | 1.03577E-14 | 0.000273734 | 0.002643966 | 5.40498E-05 | -0.275175391 | -0.000937649 | MGLL                   |



|       |           |           |      |   |    |             |             |             |             |              |              |                      |
|-------|-----------|-----------|------|---|----|-------------|-------------|-------------|-------------|--------------|--------------|----------------------|
| chr7  | 97663876  | 97663940  | 65   | * | 3  | 3.59621E-12 | 6.06844E-05 | 0.002648465 | 0.000143003 | 0.202159631  | 0.160557274  |                      |
| chr13 | 113832355 | 113832963 | 609  | * | 6  | 7.37949E-10 | 0.303896195 | 0.002650207 | 0.036731834 | 0.129042921  | 0.020215726  | PCID2                |
| chr7  | 101722855 | 101723947 | 1093 | * | 7  | 7.40005E-15 | 0.001411602 | 0.00265215  | 0.00087327  | 0.181110328  | 0.064062263  | CUX1                 |
| chr14 | 24781881  | 24782128  | 248  | * | 4  | 1.67121E-10 | 0.095101085 | 0.002652645 | 0.020918216 | 0.116736963  | 0.024018338  | LTB4R                |
| chr2  | 135674925 | 135675644 | 720  | * | 4  | 7.01941E-18 | 0.000803857 | 0.002658632 | 0.000117335 | -0.200835696 | -0.088898008 | CCNT2-AS1            |
| chr9  | 136720870 | 136721646 | 777  | * | 3  | 1.84941E-11 | 0.000718732 | 0.002662736 | 0.000860268 | -0.259646142 | -0.119987612 | VAV2                 |
| chr4  | 154462667 | 154462759 | 93   | * | 2  | 7.35363E-08 | 0.037929644 | 0.002663586 | 0.007347345 | 0.155997801  | 0.089587102  | KIAA0922             |
| chr15 | 41836440  | 41837601  | 1162 | * | 13 | 2.96669E-21 | 0.200248238 | 0.002664004 | 0.025555435 | -0.228529794 | -0.023050936 | RPAP1                |
| chr4  | 7800971   | 7801337   | 367  | * | 4  | 1.30519E-14 | 0.016498469 | 0.002665393 | 0.000529638 | 0.166218862  | 0.072598845  | AFAP1                |
| chr6  | 167060990 | 167062226 | 1237 | * | 4  | 2.14696E-11 | 5.29341E-05 | 0.002665895 | 5.64612E-05 | 0.206429508  | 0.116202364  | RPS6KA2              |
| chr16 | 85658239  | 85658855  | 617  | * | 3  | 2.0161E-11  | 0.012203767 | 0.00266688  | 0.002562406 | 0.171646945  | 0.073468988  | GSE1                 |
| chr1  | 90228362  | 90229631  | 1270 | * | 9  | 4.74376E-21 | 0.002187367 | 0.002667208 | 0.000226799 | 0.235911445  | 0.026099668  | LRR8C, RP11-302M6.4  |
| chr2  | 60618524  | 60619220  | 697  | * | 6  | 3.30368E-17 | 0.002168399 | 0.002667886 | 0.000265698 | 0.165045606  | 0.066458905  |                      |
| chr3  | 71591429  | 71592784  | 1356 | * | 6  | 8.01784E-25 | 1.30032E-09 | 0.002671642 | 2.18694E-08 | -0.335652801 | -0.179838874 | FOXP1                |
| chr7  | 38356729  | 38357684  | 956  | * | 5  | 3.50662E-13 | 0.019415525 | 0.002673043 | 0.001112657 | -0.135432703 | -0.078562342 | TRGV9                |
| chr3  | 122281881 | 122282157 | 277  | * | 3  | 5.05835E-10 | 0.147422427 | 0.002673152 | 0.018231049 | 0.185991745  | 0.067654718  | PARP9                |
| chr2  | 74779799  | 74780617  | 819  | * | 9  | 8.78108E-25 | 0.000497813 | 0.002674756 | 3.7067E-05  | 0.287567751  | 0.088601755  | DOK1, LOXL3          |
| chr3  | 184052473 | 184052664 | 192  | * | 3  | 4.27417E-09 | 0.304495431 | 0.002675082 | 0.023483218 | 0.126703648  | 0.03897023   | EIF2B5, EIF4G1       |
| chr22 | 37309130  | 37309658  | 529  | * | 3  | 8.7752E-09  | 0.507489859 | 0.002675285 | 0.021751354 | -0.140906256 | -0.041928495 |                      |
| chr1  | 203255843 | 203256204 | 362  | * | 4  | 6.65727E-11 | 0.067901591 | 0.002675627 | 0.012780311 | -0.346647465 | -0.106834236 |                      |
| chr20 | 30618874  | 30619846  | 973  | * | 10 | 2.64045E-23 | 0.007923277 | 0.002676168 | 8.96275E-05 | -0.262238828 | -0.064760827 | CCM2L, RP1-310O13.7  |
| chr16 | 84400620  | 84401247  | 628  | * | 3  | 3.99373E-12 | 0.033650075 | 0.002677089 | 0.004245036 | -0.157966708 | -0.086431836 |                      |
| chr12 | 56425731  | 56425944  | 214  | * | 2  | 2.73585E-08 | 0.004334396 | 0.002677812 | 0.002903596 | -0.310968535 | -0.171354491 | IKZF4, RP11-603J24.4 |
| chr4  | 154387984 | 154388535 | 552  | * | 4  | 1.34883E-15 | 0.000932627 | 0.00267958  | 0.000538907 | -0.163224988 | -0.039837046 | KIAA0922             |
| chr16 | 69762026  | 69762563  | 538  | * | 3  | 8.262E-09   | 0.339588834 | 0.002681149 | 0.020021382 | -0.285077479 | -0.096684927 | CTD-2033A16.3        |
| chr16 | 88972466  | 88973351  | 886  | * | 6  | 1.58079E-19 | 0.000421458 | 0.002685379 | 6.97356E-05 | 0.261180182  | 0.095308104  | CBFA2T3              |
| chr12 | 132899234 | 132899503 | 270  | * | 2  | 1.09295E-09 | 0.003215518 | 0.002685602 | 0.002453167 | 0.172751127  | 0.119705626  | GALNT9               |
| chr20 | 34193349  | 34193408  | 60   | * | 2  | 2.29355E-08 | 0.145433338 | 0.002688696 | 0.009656371 | 0.106084913  | 0.054381455  | FER1L4               |
| chr1  | 211757109 | 211757434 | 326  | * | 3  | 8.91463E-14 | 0.002194942 | 0.002694045 | 0.000379544 | -0.231843849 | -0.135875306 |                      |

|       |           |           |      |   |    |             |             |             |             |              |              |                        |
|-------|-----------|-----------|------|---|----|-------------|-------------|-------------|-------------|--------------|--------------|------------------------|
| chr11 | 134103727 | 134104882 | 1156 | * | 6  | 2.94738E-20 | 0.002366319 | 0.002695231 | 0.0001716   | 0.186166687  | 0.056716603  | VPS26B                 |
| chr3  | 197675996 | 197676032 | 37   | * | 2  | 8.69572E-12 | 0.000721488 | 0.002695731 | 0.000927659 | 0.172738126  | 0.108105448  | IQCG                   |
| chr22 | 24915037  | 24916084  | 1048 | * | 5  | 4.2756E-16  | 0.068073441 | 0.002695859 | 0.001370125 | -0.234066676 | -0.082358616 | UPB1                   |
| chr1  | 110345967 | 110346588 | 622  | * | 2  | 8.7573E-11  | 4.87247E-05 | 0.002698495 | 0.000107241 | 0.163675807  | 0.154552308  |                        |
| chr8  | 126448033 | 126448338 | 306  | * | 2  | 1.35483E-09 | 0.014833949 | 0.002698709 | 0.005314616 | -0.245609444 | -0.150049276 | TRIB1                  |
| chr11 | 2532782   | 2532836   | 55   | * | 2  | 1.1574E-08  | 0.001432778 | 0.002709942 | 0.001489331 | -0.297951743 | -0.195151879 | KCNQ1                  |
| chr9  | 116792216 | 116793036 | 821  | * | 4  | 4.01711E-16 | 2.49366E-05 | 0.002712386 | 4.20434E-05 | 0.180051767  | 0.125783755  | ZNF618                 |
| chr20 | 49201542  | 49202225  | 684  | * | 3  | 8.56687E-15 | 0.002703184 | 0.00271387  | 0.000331251 | -0.256243389 | -0.131063121 |                        |
| chr5  | 133585406 | 133585491 | 86   | * | 2  | 3.5892E-08  | 0.0036695   | 0.002719569 | 0.002665348 | -0.278376477 | -0.124378415 | CDKL3, CTD-2410N18.4   |
| chr5  | 126853924 | 126853954 | 31   | * | 2  | 2.0879E-11  | 0.008650632 | 0.002719683 | 0.004191978 | 0.026180712  | 0.017977429  | PRRC1                  |
| chr2  | 2686097   | 2686793   | 697  | * | 2  | 9.08124E-11 | 0.000441335 | 0.002722744 | 0.000649585 | 0.15826628   | 0.114874879  |                        |
| chr9  | 111175602 | 111175675 | 74   | * | 2  | 1.466E-07   | 0.014279892 | 0.00272759  | 0.005267044 | -0.241178217 | -0.137640645 |                        |
| chr19 | 12997418  | 12998927  | 1510 | * | 9  | 3.30175E-38 | 4.93573E-11 | 0.00273149  | 2.07138E-10 | 0.196184505  | 0.128261951  | KLF1                   |
| chr21 | 27512686  | 27514071  | 1386 | * | 7  | 2.61572E-16 | 0.001386943 | 0.002733596 | 0.000172347 | -0.24889273  | -0.087206352 | APP                    |
| chr1  | 246588503 | 246588723 | 221  | * | 2  | 2.75076E-12 | 5.45678E-05 | 0.002733873 | 0.00011863  | 0.174356104  | 0.161037765  | SMYD3                  |
| chr6  | 41253757  | 41255090  | 1334 | * | 9  | 1.07647E-26 | 0.000181319 | 0.002742141 | 7.09081E-06 | -0.316755251 | -0.121676271 | TREM1                  |
| chr1  | 179333987 | 179334176 | 190  | * | 2  | 1.21644E-08 | 0.019428445 | 0.002745055 | 0.005987806 | -0.208171336 | -0.108696346 |                        |
| chr18 | 72067689  | 72067761  | 73   | * | 2  | 1.77061E-12 | 5.82801E-05 | 0.002749719 | 0.000125733 | -0.13993445  | -0.139806074 |                        |
| chr6  | 37504404  | 37505024  | 621  | * | 4  | 7.39564E-10 | 0.047970239 | 0.002750043 | 0.009770537 | 0.101493015  | 0.006366348  |                        |
| chr6  | 27247586  | 27247663  | 78   | * | 2  | 3.68376E-08 | 0.021703652 | 0.002751861 | 0.006253273 | 0.029885445  | 0.02839639   |                        |
| chr1  | 160066344 | 160066587 | 244  | * | 2  | 7.71848E-11 | 0.000323265 | 0.002759312 | 0.000514712 | -0.122902072 | -0.094185011 | IGSF8                  |
| chr13 | 99964340  | 99964882  | 543  | * | 4  | 2.02132E-16 | 0.000419174 | 0.002760194 | 6.99393E-05 | -0.172810733 | -0.101692558 | UBAC2                  |
| chr17 | 73265381  | 73267556  | 2176 | * | 13 | 2.85437E-18 | 0.00729431  | 0.00276096  | 0.000462586 | -0.322782214 | -0.021687716 | RP11-649A18.12, MIF4GD |
| chr3  | 15382789  | 15383715  | 927  | * | 5  | 5.41691E-17 | 0.003063829 | 0.002763949 | 0.000530064 | 0.161460393  | 0.050675856  | SH3BP5                 |
| chr10 | 32627475  | 32627605  | 131  | * | 2  | 4.01112E-11 | 7.3849E-05  | 0.00276782  | 0.000154361 | -0.262772281 | -0.071178013 | EPC1                   |
| chr17 | 47468118  | 47468455  | 338  | * | 2  | 7.11054E-09 | 0.01252133  | 0.002769001 | 0.005025878 | -0.189329429 | -0.09043428  | RP11-81K2.1            |
| chr12 | 53902690  | 53903067  | 378  | * | 4  | 2.23275E-15 | 1.89461E-05 | 0.002770563 | 3.88326E-05 | -0.297814072 | -0.092771082 | RP11-793H13.10, ATF7   |
| chr19 | 7413482   | 7414062   | 581  | * | 6  | 6.60933E-19 | 2.40226E-05 | 0.002771154 | 4.68058E-05 | -0.291969279 | -0.095639671 | CTB-133G6.1            |
| chr8  | 23396373  | 23396887  | 515  | * | 3  | 2.37372E-14 | 1.03731E-05 | 0.002772002 | 3.22576E-05 | -0.277864235 | -0.201633369 | SLC25A37               |

|       |           |           |      |   |    |             |             |             |             |              |              |                         |
|-------|-----------|-----------|------|---|----|-------------|-------------|-------------|-------------|--------------|--------------|-------------------------|
| chr1  | 167570711 | 167570890 | 180  | * | 2  | 3.61248E-12 | 4.92814E-05 | 0.00277336  | 0.000108821 | -0.266216222 | -0.233131489 |                         |
| chr20 | 35093928  | 35094679  | 752  | * | 3  | 5.18562E-12 | 0.001172919 | 0.002775089 | 0.000399012 | 0.138718125  | 0.08558696   | DLGAP4                  |
| chr17 | 62408907  | 62409584  | 678  | * | 2  | 8.71348E-11 | 5.42037E-05 | 0.002777508 | 0.000118274 | -0.245800567 | -0.174724846 |                         |
| chr7  | 2115808   | 2117171   | 1364 | * | 7  | 3.78013E-28 | 5.5232E-05  | 0.002777571 | 7.04392E-07 | -0.30763439  | -0.123107846 | MAD1L1                  |
| chr15 | 63233142  | 63233164  | 23   | * | 2  | 1.287E-11   | 4.52569E-05 | 0.002782881 | 0.000101052 | 0.149937612  | 0.148765738  |                         |
| chr17 | 18853473  | 18853737  | 265  | * | 2  | 1.6914E-10  | 0.005908588 | 0.002783084 | 0.003506776 | 0.167613424  | 0.074873233  | SLC5A10                 |
| chr6  | 34245268  | 34245341  | 74   | * | 2  | 5.41424E-10 | 0.000389127 | 0.00278405  | 0.000594996 | 0.171765323  | 0.136823281  |                         |
| chr18 | 74124270  | 74124445  | 176  | * | 2  | 1.0618E-08  | 0.006164038 | 0.002789744 | 0.003590215 | -0.146629427 | -0.080776078 | ZNF516                  |
| chr8  | 142131465 | 142131725 | 261  | * | 2  | 1.4196E-11  | 0.000100875 | 0.002789894 | 0.00020145  | -0.176233608 | -0.167544814 | DENND3                  |
| chr13 | 50216117  | 50216366  | 250  | * | 2  | 1.91258E-08 | 0.005517907 | 0.002793189 | 0.003388957 | -0.165724024 | -0.100876419 |                         |
| chr14 | 24804750  | 24805389  | 640  | * | 3  | 2.88938E-14 | 0.000608775 | 0.002798054 | 0.00059473  | -0.190861932 | -0.100246157 | RP11-934B9.3, RIPK3     |
| chr10 | 34062018  | 34062234  | 217  | * | 3  | 5.25174E-10 | 0.011243859 | 0.002802622 | 0.004370541 | -0.075925741 | -0.042629548 |                         |
| chr11 | 60634051  | 60634092  | 42   | * | 2  | 1.5234E-08  | 0.012345954 | 0.00280268  | 0.005033333 | 0.11702723   | 0.068687316  |                         |
| chr10 | 6245036   | 6245271   | 236  | * | 4  | 3.53689E-10 | 0.041887937 | 0.002804249 | 0.012144609 | 0.029431822  | 0.010491434  | PFKFB3                  |
| chr20 | 57581903  | 57583709  | 1807 | * | 26 | 1.71508E-72 | 1.08729E-09 | 0.002804463 | 1.75019E-12 | -0.339184352 | -0.067183844 | CTSZ                    |
| chr9  | 130116144 | 130116418 | 275  | * | 2  | 5.64283E-10 | 0.002847312 | 0.00280478  | 0.002333337 | -0.208372423 | -0.070497398 | GARNL3                  |
| chr14 | 91853682  | 91853728  | 47   | * | 2  | 4.72912E-09 | 0.003570234 | 0.002805725 | 0.002666678 | 0.126811128  | 0.07254499   | CCDC88C                 |
| chr20 | 39800368  | 39801027  | 660  | * | 3  | 3.63961E-09 | 0.035643322 | 0.002808754 | 0.007222045 | 0.164685591  | 0.050002214  | PLCG1                   |
| chr17 | 45337985  | 45338019  | 35   | * | 2  | 2.21637E-09 | 0.00068944  | 0.002808822 | 0.000911844 | 0.148902476  | 0.129251745  | ITGB3, ITGB3            |
| chr5  | 158381069 | 158381268 | 200  | * | 2  | 1.75313E-08 | 0.004147219 | 0.002810206 | 0.002907259 | -0.148044279 | -0.125664946 | EBF1                    |
| chr2  | 36922916  | 36924820  | 1905 | * | 5  | 1.28074E-14 | 5.51001E-07 | 0.002811099 | 1.12141E-06 | -0.218892681 | -0.079651628 | VIT                     |
| chr1  | 165823725 | 165823772 | 48   | * | 2  | 1.08873E-09 | 0.000320927 | 0.002812886 | 0.000514861 | -0.226693285 | -0.147773959 | UCK2                    |
| chr4  | 2942362   | 2942425   | 64   | * | 2  | 2.37818E-09 | 0.006090568 | 0.002813283 | 0.003584929 | 0.1946867    | 0.121021293  | NOP14-AS1, NOP14        |
| chr1  | 6978618   | 6978798   | 181  | * | 2  | 7.62552E-11 | 9.87922E-05 | 0.002816225 | 0.000198346 | -0.124624852 | -0.123719501 | CAMTA1                  |
| chr6  | 30045041  | 30045280  | 240  | * | 3  | 2.04153E-13 | 0.002923167 | 0.00281641  | 0.0007314   | 0.159537683  | 0.082263081  |                         |
| chr11 | 129723947 | 129723987 | 41   | * | 2  | 7.0188E-13  | 4.76952E-05 | 0.00281674  | 0.000106027 | -0.133554803 | -0.112707066 | TMEM45B                 |
| chr12 | 25103173  | 25103643  | 471  | * | 3  | 1.66982E-15 | 6.06513E-05 | 0.002817769 | 0.000135264 | 0.164243865  | 0.101758311  | RP11-662I13.2           |
| chr19 | 44304559  | 44304770  | 212  | * | 3  | 7.85932E-10 | 0.004525979 | 0.002818539 | 0.002502025 | 0.126242034  | 0.079560384  | LYPD5                   |
| chr8  | 24242024  | 24242109  | 86   | * | 2  | 8.18832E-08 | 0.06107615  | 0.002819184 | 0.008682279 | -0.197096896 | -0.103957599 | ADAMDEC1, RP11-624C23.1 |

|       |           |           |      |   |    |             |             |             |             |              |              |                     |
|-------|-----------|-----------|------|---|----|-------------|-------------|-------------|-------------|--------------|--------------|---------------------|
| chr1  | 249157502 | 249157575 | 74   | * | 2  | 4.03915E-10 | 0.000197661 | 0.002826722 | 0.00035161  | -0.057474195 | -0.020616668 | AL672294.1          |
| chr3  | 194844174 | 194844358 | 185  | * | 2  | 5.78592E-08 | 0.044363226 | 0.002827185 | 0.008028747 | 0.120660835  | 0.065839418  | XXYLT1              |
| chr22 | 19919974  | 19920275  | 302  | * | 3  | 4.77854E-09 | 0.123050302 | 0.002831034 | 0.015035402 | -0.226004837 | -0.082423127 | TXNRD2              |
| chr14 | 57274550  | 57275282  | 733  | * | 8  | 1.80105E-12 | 0.142243547 | 0.002833258 | 0.018171211 | 0.079652289  | 0.022398283  | OTX2                |
| chr10 | 80757927  | 80758294  | 368  | * | 2  | 4.16534E-09 | 0.001529312 | 0.002834006 | 0.001585547 | -0.169457652 | -0.110384716 | ZMIZ1-AS1           |
| chr2  | 43440068  | 43440321  | 254  | * | 2  | 6.73028E-10 | 0.000368552 | 0.002836052 | 0.000574214 | -0.145742039 | -0.120706616 | THADA               |
| chr11 | 68846972  | 68847839  | 868  | * | 3  | 9.49373E-13 | 0.002126749 | 0.00283849  | 0.001465072 | -0.241170356 | -0.052533586 | TPCN2               |
| chr11 | 70173450  | 70173985  | 536  | * | 4  | 7.29295E-16 | 0.003258035 | 0.00283868  | 0.000333452 | -0.197808333 | -0.071267148 | PPFIA1, AP000487.6  |
| chr6  | 29601705  | 29602390  | 686  | * | 3  | 5.35356E-13 | 0.004231773 | 0.002839318 | 0.002691754 | -0.190596355 | -0.019869976 | GABBR1              |
| chr7  | 535789    | 535820    | 32   | * | 2  | 5.66855E-08 | 0.010057607 | 0.002839332 | 0.004622526 | 0.155019615  | 0.106216836  |                     |
| chr2  | 60579767  | 60581381  | 1615 | * | 6  | 3.34963E-12 | 0.063384686 | 0.00284189  | 0.002609665 | -0.349034292 | -0.075026404 | AC007381.3          |
| chr1  | 19248952  | 19249872  | 921  | * | 3  | 5.07865E-11 | 0.000760966 | 0.002842112 | 0.000492819 | -0.230756417 | -0.117986081 | IFFO2               |
| chr17 | 25659609  | 25659820  | 212  | * | 3  | 8.5545E-09  | 0.030081379 | 0.002842263 | 0.009257183 | -0.097412124 | -0.031501721 |                     |
| chr20 | 19954588  | 19955868  | 1281 | * | 5  | 6.89692E-16 | 1.89585E-05 | 0.002844006 | 2.83375E-06 | -0.274815416 | -0.157557871 | RIN2                |
| chr14 | 22889758  | 22891383  | 1626 | * | 6  | 5.42901E-16 | 2.01154E-06 | 0.002847358 | 2.09257E-06 | -0.270546256 | -0.134140684 | TRDV2, AE000661.37  |
| chr19 | 38791235  | 38791472  | 238  | * | 2  | 4.41368E-11 | 8.40247E-05 | 0.002848154 | 0.000173334 | 0.117892398  | 0.091436031  | CTB-102L5.4         |
| chr2  | 219246070 | 219247055 | 986  | * | 10 | 3.49247E-29 | 0.000518507 | 0.002849136 | 4.09662E-06 | -0.245939852 | -0.077132294 | SLC11A1             |
| chr6  | 7468364   | 7469052   | 689  | * | 6  | 8.50975E-15 | 0.000570663 | 0.002849863 | 0.000309495 | 0.162676281  | 0.085721     |                     |
| chr20 | 3761916   | 3762520   | 605  | * | 8  | 1.05607E-11 | 0.043446388 | 0.002854034 | 0.017720253 | -0.090103326 | -0.016180884 | SPEF1               |
| chr14 | 59813888  | 59814285  | 398  | * | 3  | 1.23046E-10 | 0.00217328  | 0.002863377 | 0.00201038  | -0.307601944 | -0.124753561 | DAAM1               |
| chr2  | 105924245 | 105925965 | 1721 | * | 7  | 1.36869E-16 | 6.26236E-06 | 0.002868707 | 8.40031E-06 | -0.21247371  | -0.015631468 | TGFBRAP1            |
| chr17 | 70693956  | 70694204  | 249  | * | 2  | 1.04633E-10 | 0.000133708 | 0.002869489 | 0.000256488 | 0.149546087  | 0.128830829  | SLC39A11            |
| chr14 | 23762832  | 23763073  | 242  | * | 3  | 1.21904E-09 | 0.002275568 | 0.00287039  | 0.001998175 | 0.162237021  | 0.048125312  | RP11-124D2.7, HOMEZ |
| chr20 | 47846707  | 47847532  | 826  | * | 2  | 1.54454E-09 | 8.5027E-05  | 0.002874017 | 0.000175415 | -0.112961003 | -0.007118232 | DDX27               |
| chr2  | 175545838 | 175547747 | 1910 | * | 10 | 2.20479E-16 | 6.72126E-05 | 0.002877835 | 1.94743E-05 | -0.344813713 | -0.042987388 | AC018890.6, WIPF1   |
| chr3  | 11651536  | 11651990  | 455  | * | 4  | 2.69286E-15 | 0.00022104  | 0.002881588 | 5.85746E-05 | 0.121048224  | 0.065195456  | VGLL4               |
| chr15 | 39874413  | 39874776  | 364  | * | 2  | 1.91189E-14 | 5.43127E-05 | 0.00288582  | 0.000119278 | 0.120686592  | 0.096522275  | THBS1               |
| chr17 | 40463425  | 40464318  | 894  | * | 4  | 8.90067E-16 | 2.8593E-05  | 0.002887362 | 6.61967E-05 | -0.226594269 | -0.106761727 | STAT5A              |
| chr13 | 78090644  | 78090688  | 45   | * | 2  | 2.89224E-11 | 6.04737E-05 | 0.002893962 | 0.000131035 | -0.261758879 | -0.243455194 |                     |

|       |           |           |      |   |    |             |             |             |             |              |              |                              |
|-------|-----------|-----------|------|---|----|-------------|-------------|-------------|-------------|--------------|--------------|------------------------------|
| chr12 | 27856714  | 27856865  | 152  | * | 2  | 2.94903E-08 | 0.113298786 | 0.00289502  | 0.009948473 | -0.162084789 | -0.077850104 | RP11-1060J15.4               |
| chr16 | 89785686  | 89787000  | 1315 | * | 9  | 8.27151E-21 | 0.003638454 | 0.002895263 | 0.000264025 | -0.109908494 | -0.015073099 | ZNF276, VPS9D1               |
| chr17 | 1637068   | 1637391   | 324  | * | 4  | 4.9337E-10  | 0.010603545 | 0.002895924 | 0.005170328 | 0.034255224  | 0.016155087  | WDR81, RP11-961A15.1         |
| chr11 | 124709084 | 124709245 | 162  | * | 3  | 6.19332E-10 | 0.047258476 | 0.002896888 | 0.006995238 | 0.050774383  | 0.024072339  |                              |
| chr1  | 161183762 | 161184528 | 767  | * | 5  | 4.60551E-18 | 0.004517167 | 0.002909078 | 0.000187323 | -0.34422256  | -0.147441268 | NDUFS2                       |
| chr11 | 2542580   | 2543051   | 472  | * | 4  | 3.6465E-09  | 0.269204461 | 0.002913197 | 0.028045579 | -0.236749182 | -0.057943074 | KCNQ1                        |
| chr4  | 114262093 | 114262363 | 271  | * | 2  | 4.52785E-09 | 0.014280645 | 0.002913735 | 0.005497616 | 0.13662821   | 0.053452182  | ANK2                         |
| chr8  | 128755270 | 128755294 | 25   | * | 2  | 1.6474E-11  | 4.83122E-05 | 0.00291466  | 0.000107841 | -0.1902202   | -0.133243783 |                              |
| chr11 | 71956145  | 71957134  | 990  | * | 6  | 4.10692E-20 | 3.65737E-06 | 0.002917167 | 1.57273E-05 | 0.116012996  | 0.08604347   | PHOX2A                       |
| chr4  | 185781167 | 185781248 | 82   | * | 2  | 7.7982E-11  | 9.08981E-05 | 0.002919108 | 0.000186257 | -0.275120248 | -0.180500104 |                              |
| chr22 | 24488507  | 24489132  | 626  | * | 3  | 6.86449E-13 | 0.002191807 | 0.002920013 | 0.000469125 | 0.138118206  | 0.087036066  | CABIN1                       |
| chr6  | 108395545 | 108395859 | 315  | * | 2  | 9.54996E-11 | 0.007602211 | 0.00292027  | 0.00410428  | 0.029784522  | 0.013091061  | OSTM1                        |
| chr14 | 25064779  | 25065130  | 352  | * | 3  | 8.67512E-11 | 0.034311517 | 0.002921371 | 0.00154526  | -0.186479079 | -0.093653905 | RP11-104E19.1                |
| chr15 | 83736925  | 83736960  | 36   | * | 2  | 3.20996E-11 | 0.038909516 | 0.002922994 | 0.007928154 | 0.182518358  | 0.080134964  | RP11-382A20.5, RP11-382A20.6 |
| chr4  | 10022984  | 10023201  | 218  | * | 4  | 1.99741E-13 | 7.22811E-05 | 0.002923083 | 0.0001597   | -0.177150922 | -0.078284489 | SLC2A9                       |
| chr14 | 23266481  | 23266959  | 479  | * | 3  | 1.72612E-10 | 0.015733376 | 0.002924864 | 0.00250863  | -0.293513327 | -0.069666214 | SLC7A7                       |
| chr2  | 239358563 | 239358907 | 345  | * | 3  | 1.06714E-10 | 0.014054472 | 0.002925097 | 0.001893698 | -0.189280103 | -0.099956547 | ASB1                         |
| chr3  | 170019329 | 170019826 | 498  | * | 3  | 1.1041E-10  | 0.006024292 | 0.00292593  | 0.001619656 | -0.275790762 | -0.129846206 | PRKCI                        |
| chr11 | 45070638  | 45070822  | 185  | * | 3  | 3.22603E-13 | 2.07283E-05 | 0.002927744 | 5.98443E-05 | 0.16696594   | 0.131532214  |                              |
| chr17 | 48456071  | 48456169  | 99   | * | 2  | 5.0003E-12  | 5.73826E-05 | 0.002929623 | 0.000125464 | 0.138756805  | 0.138306157  | EME1, LRRC59                 |
| chr1  | 246271686 | 246271874 | 189  | * | 3  | 5.37352E-10 | 0.001216483 | 0.002931531 | 0.001179608 | 0.113898815  | 0.075678341  | SMYD3                        |
| chr17 | 16189554  | 16190567  | 1014 | * | 5  | 8.86399E-19 | 2.94559E-05 | 0.002939407 | 1.09894E-05 | 0.165943133  | 0.097283039  | PIGL                         |
| chr3  | 171094025 | 171094370 | 346  | * | 2  | 1.49631E-11 | 4.90949E-05 | 0.002941443 | 0.000109539 | -0.143811396 | -0.105113082 | TNIK                         |
| chr19 | 10399805  | 10401361  | 1557 | * | 9  | 5.45654E-14 | 0.014419105 | 0.002943249 | 0.004960062 | -0.065638853 | -0.023306882 | ICAM5                        |
| chr10 | 134621538 | 134622602 | 1065 | * | 5  | 1.36535E-15 | 0.000255123 | 0.00294374  | 0.000260827 | 0.179986888  | 0.084988125  | TTC40                        |
| chr1  | 168194826 | 168195398 | 573  | * | 11 | 1.88968E-13 | 0.495259604 | 0.002944582 | 0.068367364 | 0.203528109  | 0.011732958  | SFT2D2                       |
| chr2  | 232256981 | 232257271 | 291  | * | 2  | 2.21337E-08 | 0.134853803 | 0.002946982 | 0.010331447 | -0.266155834 | -0.137459897 | AC017104.6                   |
| chr20 | 3804771   | 3805186   | 416  | * | 2  | 3.68979E-10 | 0.000387666 | 0.002950682 | 0.000604409 | 0.11032593   | 0.078258441  | AP5S1                        |
| chr17 | 9939895   | 9940970   | 1076 | * | 7  | 1.59248E-24 | 7.03622E-06 | 0.002952412 | 2.23036E-06 | -0.29687629  | -0.13743748  | GAS7                         |

|       |           |           |      |   |    |             |             |             |             |              |              |                                          |
|-------|-----------|-----------|------|---|----|-------------|-------------|-------------|-------------|--------------|--------------|------------------------------------------|
| chr13 | 28674885  | 28675510  | 626  | * | 6  | 4.99576E-13 | 0.017296859 | 0.002954264 | 0.006819344 | -0.217396448 | -0.056012411 |                                          |
| chr16 | 85334190  | 85334289  | 100  | * | 2  | 2.40686E-08 | 0.009402093 | 0.00295449  | 0.004587336 | 0.122286386  | 0.052106255  |                                          |
| chr12 | 7066563   | 7066938   | 376  | * | 5  | 8.65736E-16 | 0.003343125 | 0.002954814 | 0.000192337 | 0.195877382  | 0.08516894   | PTPN6                                    |
| chr1  | 236027847 | 236028011 | 165  | * | 2  | 1.65934E-11 | 6.87431E-05 | 0.002954823 | 0.000146972 | -0.236919164 | -0.19903631  | LYST                                     |
| chr19 | 45250754  | 45251551  | 798  | * | 5  | 1.87796E-12 | 0.054748872 | 0.002958171 | 0.009045651 | -0.061742588 | 0.003442779  | BCL3                                     |
| chr7  | 96745340  | 96746356  | 1017 | * | 5  | 5.98223E-16 | 0.013750019 | 0.002958311 | 0.000894836 | -0.148144518 | 0.001282055  | ACN9                                     |
| chr15 | 29232842  | 29233610  | 769  | * | 3  | 8.67158E-11 | 0.000324721 | 0.002959778 | 0.000338894 | 0.211137878  | 0.103354269  | APBA2                                    |
| chr17 | 47480679  | 47481492  | 814  | * | 5  | 1.28668E-14 | 0.000849548 | 0.002961974 | 0.000395247 | -0.244479858 | -0.078942377 | RP11-81K2.1, RP11-1079K10.4, PHB         |
| chr9  | 123688715 | 123689193 | 479  | * | 4  | 7.76404E-17 | 4.35467E-05 | 0.00296316  | 3.45611E-05 | -0.33204493  | -0.202974269 | TRAF1                                    |
| chr6  | 139794360 | 139795527 | 1168 | * | 5  | 7.2484E-16  | 2.95101E-06 | 0.002963407 | 1.08703E-06 | -0.155602391 | -0.095676843 |                                          |
| chr1  | 212587188 | 212588848 | 1661 | * | 14 | 4.28556E-19 | 0.04658377  | 0.002968013 | 0.004433933 | -0.048590866 | -0.00459845  | TMEM206                                  |
| chr19 | 58918743  | 58919549  | 807  | * | 4  | 2.12379E-17 | 1.51524E-05 | 0.002970245 | 2.00507E-05 | 0.188363053  | 0.096448371  | ZNF584, CTD-2619J13.14                   |
| chr2  | 3522506   | 3523935   | 1430 | * | 12 | 1.16859E-18 | 0.014228531 | 0.002970446 | 0.004522604 | -0.046416646 | 0.002716665  | AC142528.1, ADI1                         |
| chr1  | 110302332 | 110302560 | 229  | * | 5  | 1.54743E-14 | 0.005647213 | 0.002977663 | 0.000506628 | -0.138106748 | -0.040058568 | GSTM5, RP4-735C1.4, EPS8L3               |
| chr2  | 11917623  | 11917787  | 165  | * | 2  | 3.63964E-08 | 0.184234521 | 0.00297876  | 0.010763113 | -0.181991115 | -0.088465506 | LPIN1                                    |
| chr17 | 4875559   | 4876237   | 679  | * | 5  | 1.93096E-14 | 0.016528898 | 0.002979337 | 0.000893794 | 0.160152157  | 0.067592684  | RP5-1050D4.2, CAMTA2                     |
| chr5  | 1128038   | 1128391   | 354  | * | 3  | 1.15121E-10 | 0.008601574 | 0.002981971 | 0.001491799 | 0.133041199  | 0.085697238  |                                          |
| chr14 | 92507291  | 92507800  | 510  | * | 4  | 1.97798E-14 | 0.083033217 | 0.002986833 | 0.001341892 | 0.144406868  | 0.058825762  |                                          |
| chr20 | 62669102  | 62670570  | 1469 | * | 9  | 5.11569E-22 | 1.13357E-06 | 0.002986961 | 3.47632E-06 | -0.084132034 | -0.009939616 | LINC00176, ZNF512B                       |
| chr10 | 115478900 | 115479248 | 349  | * | 3  | 2.95285E-10 | 0.001827524 | 0.002990434 | 0.001749036 | -0.154557929 | -0.061623325 | CASP7, RP11-211N11.5                     |
| chr22 | 47081903  | 47082260  | 358  | * | 3  | 6.56461E-10 | 0.176150497 | 0.002991446 | 0.016872727 | -0.318855852 | -0.124062312 | CERK                                     |
| chr19 | 47287778  | 47288915  | 1138 | * | 8  | 8.11077E-22 | 0.000187898 | 0.002991796 | 1.48088E-05 | -0.060452409 | -0.016554891 | SLC1A5                                   |
| chr2  | 216948982 | 216949469 | 488  | * | 2  | 9.48492E-10 | 0.000586143 | 0.002994822 | 0.000828933 | 0.115755245  | 0.099518434  | TMEM169                                  |
| chr20 | 5159145   | 5159437   | 293  | * | 3  | 8.71715E-08 | 0.118282206 | 0.002996013 | 0.018170289 | 0.169926963  | 0.049798042  | CDS2                                     |
| chr13 | 47471264  | 47472429  | 1166 | * | 14 | 2.0203E-41  | 6.68395E-11 | 0.002998135 | 3.81021E-10 | 0.152517045  | 0.08985598   |                                          |
| chr10 | 98405486  | 98406291  | 806  | * | 2  | 1.52632E-09 | 5.12608E-05 | 0.003007422 | 0.000114189 | -0.20988332  | -0.201284705 | PIK3AP1                                  |
| chr16 | 56390024  | 56390429  | 406  | * | 2  | 6.78421E-11 | 0.003490082 | 0.003008789 | 0.002728031 | 0.191583394  | 0.083475263  | GNAO1                                    |
| chr11 | 134132696 | 134132814 | 119  | * | 2  | 3.47857E-10 | 0.000175865 | 0.003009907 | 0.000325077 | 0.168870219  | 0.144109422  | ACAD8                                    |
| chr16 | 30545962  | 30546843  | 882  | * | 14 | 1.1601E-14  | 0.342920893 | 0.003011417 | 0.051369718 | 0.034002972  | 0.005640643  | AC002310.12, ZNF747, ZNF747, AC002310.13 |

|       |           |           |      |   |    |             |             |             |             |              |              |                            |
|-------|-----------|-----------|------|---|----|-------------|-------------|-------------|-------------|--------------|--------------|----------------------------|
| chr1  | 212412767 | 212413038 | 272  | * | 2  | 3.433E-09   | 0.000817205 | 0.003015583 | 0.001057851 | 0.194927222  | 0.15618583   |                            |
| chr1  | 45007988  | 45009401  | 1414 | * | 4  | 4.67834E-14 | 2.27199E-08 | 0.003020747 | 2.20961E-07 | 0.147598353  | -0.041273519 | RNF220                     |
| chr16 | 68734216  | 68734735  | 520  | * | 2  | 2.38759E-10 | 0.000194531 | 0.003020896 | 0.000353211 | -0.24273917  | -0.069047258 | CDH3                       |
| chr20 | 30195969  | 30196714  | 746  | * | 5  | 5.72357E-18 | 0.000293162 | 0.003021572 | 0.00012589  | -0.179063448 | -0.059097085 |                            |
| chr6  | 44197180  | 44197198  | 19   | * | 2  | 1.3994E-07  | 0.02376531  | 0.003023423 | 0.006898883 | -0.118319036 | -0.069484812 | SLC29A1                    |
| chr5  | 169409132 | 169409235 | 104  | * | 2  | 5.92701E-08 | 0.019256662 | 0.003026131 | 0.006373    | 0.136586915  | 0.090286858  | DOCK2                      |
| chr15 | 45248086  | 45248932  | 847  | * | 7  | 8.80955E-12 | 0.137394419 | 0.003027404 | 0.020799726 | 0.104248805  | 0.021921341  | C15orf43                   |
| chr18 | 72920877  | 72921969  | 1093 | * | 10 | 1.59256E-13 | 0.165526991 | 0.003029466 | 0.028066468 | 0.041572354  | 0.008163706  | ZADH2                      |
| chr4  | 140770576 | 140770596 | 21   | * | 2  | 6.46782E-11 | 0.000146731 | 0.003031355 | 0.000280607 | 0.190100505  | 0.174178054  | MAML3                      |
| chr10 | 14598044  | 14598289  | 246  | * | 4  | 1.38778E-10 | 0.228556638 | 0.003032465 | 0.035877533 | -0.244563734 | -0.047139399 | FAM107B                    |
| chr7  | 127761751 | 127762091 | 341  | * | 2  | 2.76488E-09 | 0.000761144 | 0.003037862 | 0.001008066 | -0.152172998 | -0.134053413 |                            |
| chr17 | 77966750  | 77967813  | 1064 | * | 7  | 1.09244E-24 | 3.94224E-05 | 0.003038551 | 7.93144E-06 | -0.235157299 | -0.098966905 | TBC1D16                    |
| chr1  | 231799060 | 231799423 | 364  | * | 2  | 2.99492E-11 | 5.45755E-05 | 0.003044019 | 0.000120881 | -0.205025364 | -0.190689079 | TSNAX-DISC1, DISC1         |
| chr5  | 56718310  | 56718809  | 500  | * | 4  | 9.30883E-14 | 0.08480056  | 0.003045626 | 0.000950288 | 0.103149012  | 0.009879894  | CTD-2023N9.1, SALL4P1      |
| chr15 | 70432922  | 70434018  | 1097 | * | 3  | 1.06045E-09 | 0.000156562 | 0.00305161  | 0.000154428 | -0.267969713 | -0.153484916 |                            |
| chr11 | 1319648   | 1321213   | 1566 | * | 10 | 1.15279E-24 | 2.92534E-06 | 0.003054954 | 1.28804E-06 | -0.18655082  | -0.005926325 | TOLLIP                     |
| chr5  | 179194913 | 179196144 | 1232 | * | 3  | 2.4427E-14  | 1.27272E-06 | 0.003056004 | 5.82862E-06 | -0.214559343 | -0.182788402 | MAML1                      |
| chr19 | 54368958  | 54369311  | 354  | * | 5  | 1.44948E-12 | 0.010494766 | 0.003059195 | 0.004608323 | -0.134376935 | -0.04123737  | AC008440.10, AC008753.6    |
| chr17 | 1614268   | 1614953   | 686  | * | 2  | 2.25166E-12 | 0.00219639  | 0.003061545 | 0.002073993 | 0.146447056  | 0.052804633  | MIR22HG                    |
| chr1  | 46915458  | 46916419  | 962  | * | 5  | 2.22362E-12 | 0.006648276 | 0.003065536 | 0.000762381 | 0.128090363  | 0.057170152  |                            |
| chr14 | 50506033  | 50507529  | 1497 | * | 8  | 4.28809E-21 | 0.003889887 | 0.003066563 | 0.000404419 | -0.360147575 | -0.081963691 | RP11-58E21.3, RP11-58E21.5 |
| chr22 | 40341342  | 40343102  | 1761 | * | 6  | 2.89933E-13 | 0.000706315 | 0.003067104 | 3.30668E-05 | 0.156043725  | 0.055554524  | GRAP2                      |
| chr7  | 50626272  | 50626298  | 27   | * | 2  | 4.12904E-11 | 6.76924E-05 | 0.003067614 | 0.000146029 | 0.18659028   | 0.169686037  | DDC                        |
| chr5  | 442385    | 443220    | 836  | * | 9  | 7.79961E-14 | 0.096409    | 0.003069828 | 0.031071314 | 0.054355328  | 0.00896684   | C5orf55                    |
| chr1  | 182760143 | 182761262 | 1120 | * | 4  | 2.50711E-14 | 1.8596E-05  | 0.003071851 | 6.43448E-05 | 0.127770599  | 0.099836476  | NPL                        |
| chr1  | 36946448  | 36949518  | 3071 | * | 10 | 1.64805E-16 | 5.34313E-05 | 0.003074545 | 3.46713E-06 | -0.291060947 | -0.091010599 | CSF3R                      |
| chr1  | 203187208 | 203187773 | 566  | * | 3  | 1.06564E-10 | 0.014240747 | 0.003078701 | 0.001142578 | -0.216310413 | -0.051262999 | CHIT1                      |
| chr17 | 48619037  | 48619308  | 272  | * | 2  | 4.47016E-08 | 0.031025549 | 0.003091912 | 0.007691386 | -0.081865578 | -0.028461332 | EPN3                       |
| chr16 | 85095535  | 85097151  | 1617 | * | 11 | 3.10193E-21 | 4.05404E-05 | 0.003097177 | 1.83772E-06 | 0.183174281  | 0.064262878  | KIAA0513                   |

|       |           |           |      |   |    |             |             |             |             |              |              |                            |
|-------|-----------|-----------|------|---|----|-------------|-------------|-------------|-------------|--------------|--------------|----------------------------|
| chr17 | 8222055   | 8222359   | 305  | * | 5  | 1.53514E-10 | 0.011617849 | 0.003097196 | 0.00486309  | 0.17955663   | 0.060990796  | ARHGEF15                   |
| chr17 | 38490228  | 38490520  | 293  | * | 2  | 7.80882E-10 | 0.000361881 | 0.003097468 | 0.000581919 | -0.232090496 | -0.140094863 | RARA                       |
| chr15 | 93579369  | 93580846  | 1478 | * | 9  | 7.59368E-34 | 4.71631E-11 | 0.003099766 | 4.11436E-10 | -0.250065751 | -0.133483948 |                            |
| chr21 | 34395548  | 34396221  | 674  | * | 3  | 2.49491E-10 | 0.015245972 | 0.003099816 | 0.006950295 | 0.056635542  | 0.017498561  | AP000282.2                 |
| chr19 | 15122135  | 15122224  | 90   | * | 3  | 2.64886E-12 | 0.001212792 | 0.00310116  | 0.001272416 | 0.050965805  | 0.03654958   | CCDC105, SLC1A6            |
| chr18 | 2845398   | 2848065   | 2668 | * | 15 | 4.52649E-24 | 5.37879E-06 | 0.003103837 | 8.39728E-07 | 0.148543724  | 0.020088561  | EMILIN2                    |
| chr2  | 234359654 | 234359783 | 130  | * | 3  | 6.9423E-11  | 0.002365252 | 0.003105707 | 0.001297926 | -0.190116335 | -0.118517317 | DGKD                       |
| chr12 | 109059679 | 109059806 | 128  | * | 2  | 1.06023E-08 | 0.003044238 | 0.003105935 | 0.00255533  | -0.312713485 | -0.169302932 | CORO1C                     |
| chr11 | 65559109  | 65559280  | 172  | * | 3  | 3.67624E-14 | 0.000836094 | 0.00310755  | 0.000412263 | 0.108919327  | 0.068255885  | OVOL1                      |
| chr11 | 94276072  | 94279068  | 2997 | * | 21 | 1.15181E-55 | 8.44334E-13 | 0.003110893 | 2.25442E-14 | -0.276717667 | -0.093746889 | PIWIL4, FUT4, RP11-867G2.8 |
| chr2  | 99871738  | 99872952  | 1215 | * | 5  | 1.35758E-19 | 0.001622766 | 0.003115219 | 7.00498E-05 | -0.314124225 | -0.091418297 | C2orf15, LYG2              |
| chr3  | 5239311   | 5239540   | 230  | * | 2  | 5.07807E-12 | 5.4841E-05  | 0.003116893 | 0.000121879 | -0.213888044 | -0.171714847 | EDEM1                      |
| chr5  | 179207291 | 179207533 | 243  | * | 3  | 2.01346E-09 | 0.006771275 | 0.003117249 | 0.002757192 | -0.276208082 | -0.113907126 | MAML1                      |
| chr5  | 78203170  | 78203311  | 142  | * | 2  | 3.14092E-08 | 0.011593647 | 0.003118495 | 0.005232116 | -0.220257215 | -0.122067759 | ARSB                       |
| chr5  | 1386150   | 1386887   | 738  | * | 6  | 9.23597E-11 | 0.787055549 | 0.003119842 | 0.051480505 | 0.035874474  | 0.010116018  |                            |
| chr17 | 78747934  | 78748494  | 561  | * | 6  | 3.76159E-21 | 2.53912E-05 | 0.003120096 | 7.9073E-06  | -0.310626568 | -0.131415626 | RPTOR                      |
| chr3  | 149191167 | 149191624 | 458  | * | 4  | 1.71548E-12 | 0.073426548 | 0.003124391 | 0.003713576 | -0.180125211 | -0.08471051  |                            |
| chr1  | 220964827 | 220965460 | 634  | * | 3  | 1.70634E-13 | 0.013352649 | 0.00312663  | 0.0003849   | -0.146797865 | -0.094569989 | MARC1                      |
| chr19 | 1854549   | 1854819   | 271  | * | 4  | 1.31645E-17 | 6.98748E-06 | 0.003130406 | 1.03726E-05 | 0.151189987  | 0.074335506  | KLF16                      |
| chr9  | 92041302  | 92042058  | 757  | * | 2  | 6.41595E-10 | 0.000259372 | 0.003133894 | 0.000449487 | 0.102083107  | 0.075309916  | SEMA4D                     |
| chr13 | 28931547  | 28932217  | 671  | * | 3  | 1.93807E-12 | 0.01041395  | 0.003133909 | 0.000804896 | 0.200020996  | 0.106730997  | FLT1                       |
| chr2  | 85933069  | 85933851  | 783  | * | 3  | 2.33966E-12 | 7.94362E-05 | 0.003135024 | 0.000141872 | -0.199912387 | -0.066499026 |                            |
| chr16 | 84627507  | 84629008  | 1502 | * | 8  | 4.08605E-15 | 0.000111046 | 0.003137813 | 2.60469E-05 | -0.185279477 | 0.005176513  | RP11-61F12.1, COTL1        |
| chr5  | 180301107 | 180301165 | 59   | * | 2  | 9.17125E-11 | 9.10038E-05 | 0.003137917 | 0.000189194 | -0.151984565 | -0.105129739 |                            |
| chr7  | 4727742   | 4727998   | 257  | * | 2  | 1.32976E-11 | 0.000110628 | 0.003138727 | 0.000223339 | 0.177208854  | 0.129819617  | FOXK1                      |
| chr6  | 109611667 | 109611834 | 168  | * | 2  | 2.15646E-09 | 0.00399464  | 0.003140477 | 0.003017053 | -0.222390693 | -0.146602687 | PTCHD3P3                   |
| chr17 | 76408337  | 76409193  | 857  | * | 3  | 6.05356E-11 | 0.004181802 | 0.003142927 | 0.000476437 | -0.260153816 | -0.16281911  | PGS1                       |
| chr17 | 78261378  | 78261792  | 415  | * | 2  | 1.34128E-09 | 0.000993352 | 0.003153101 | 0.001235702 | -0.144730095 | -0.134178873 | RNF213                     |
| chr11 | 6629445   | 6629459   | 15   | * | 2  | 2.63297E-12 | 0.000116312 | 0.003159398 | 0.000233308 | 0.217924391  | 0.143585558  | ILK, TAF10                 |



|       |           |           |      |   |   |             |             |             |             |              |              |                       |
|-------|-----------|-----------|------|---|---|-------------|-------------|-------------|-------------|--------------|--------------|-----------------------|
| chr11 | 126275374 | 126276079 | 706  | * | 6 | 1.36037E-15 | 0.007688213 | 0.003160511 | 0.001227392 | -0.155761001 | -0.041217727 | ST3GAL4               |
| chr3  | 50275112  | 50276265  | 1154 | * | 8 | 5.68465E-20 | 0.000212807 | 0.003168543 | 0.000170754 | -0.270343382 | -0.040833134 | GNAI2                 |
| chr7  | 27200671  | 27202797  | 2127 | * | 7 | 2.6959E-11  | 0.027569942 | 0.003168563 | 0.002186749 | -0.139287097 | -0.023991849 | HOXA9                 |
| chr9  | 137809628 | 137810490 | 863  | * | 5 | 2.60597E-13 | 0.007624592 | 0.003172297 | 0.000550502 | -0.273046046 | -0.119734402 | FCN1                  |
| chr22 | 36011405  | 36012221  | 817  | * | 5 | 2.0386E-09  | 0.309104685 | 0.003173057 | 0.044704951 | -0.183750022 | -0.029192322 | MB                    |
| chr20 | 20248523  | 20248696  | 174  | * | 3 | 1.321E-08   | 0.010730336 | 0.003178062 | 0.004986062 | 0.130949549  | 0.06664837   | C20orf26              |
| chr8  | 144213544 | 144213766 | 223  | * | 2 | 6.69402E-09 | 0.117301358 | 0.003181946 | 0.010800751 | -0.283864023 | -0.143733949 |                       |
| chr1  | 44430285  | 44430318  | 34   | * | 2 | 3.38365E-09 | 0.001313823 | 0.003181981 | 0.001504973 | -0.181262153 | -0.133878622 | IPO13                 |
| chr12 | 6442329   | 6443282   | 954  | * | 9 | 5.27896E-21 | 0.002890982 | 0.00318739  | 0.000208788 | -0.224095361 | -0.05738965  | TNFRSF1A              |
| chr14 | 39643268  | 39644110  | 843  | * | 4 | 3.68061E-14 | 0.030415487 | 0.003189791 | 0.009630668 | 0.154067593  | 0.033841599  | RP11-407N17.4         |
| chr2  | 36780691  | 36780705  | 15   | * | 3 | 4.57917E-12 | 0.000118463 | 0.003190814 | 0.000218584 | -0.19295841  | -0.153421871 | FEZ2                  |
| chr5  | 10353763  | 10354563  | 801  | * | 6 | 1.22368E-12 | 0.244179165 | 0.003191982 | 0.032810051 | 0.03761846   | 0.003576932  | MARCH6                |
| chr16 | 3559384   | 3559696   | 313  | * | 4 | 2.6081E-13  | 0.003868895 | 0.003192383 | 0.000534526 | -0.197053348 | -0.072408969 | LA16c-306E5.3, CLUAP1 |
| chr2  | 134883195 | 134884342 | 1148 | * | 3 | 2.13595E-10 | 3.48578E-05 | 0.003193903 | 7.56137E-05 | -0.270718619 | -0.038057796 | MGAT5                 |
| chr3  | 11623526  | 11624533  | 1008 | * | 7 | 3.54777E-16 | 0.045929673 | 0.003193908 | 0.001710917 | -0.170243147 | -0.050593693 | VGLL4                 |
| chr12 | 69021282  | 69022158  | 877  | * | 4 | 2.60597E-13 | 2.64725E-06 | 0.003194717 | 1.05841E-05 | 0.178571831  | 0.029493822  | RAP1B                 |
| chr7  | 2158094   | 2158623   | 530  | * | 4 | 5.55103E-12 | 0.000906014 | 0.003195274 | 0.001050052 | 0.123942654  | 0.080856223  | MAD1L1                |
| chr2  | 240387066 | 240387439 | 374  | * | 3 | 6.02311E-10 | 0.002018187 | 0.00319593  | 0.00194994  | -0.280725734 | -0.093195733 |                       |
| chr17 | 80251443  | 80251697  | 255  | * | 5 | 2.00179E-12 | 0.006427999 | 0.003198802 | 0.002357787 | 0.135353439  | 0.053200848  | RP13-516M14.1         |
| chr11 | 119232198 | 119232263 | 66   | * | 2 | 4.48857E-08 | 0.010502913 | 0.003198923 | 0.005075144 | 0.216350943  | 0.132872492  | USP2                  |
| chr1  | 8271918   | 8272277   | 360  | * | 5 | 4.6863E-13  | 0.007876568 | 0.003203202 | 0.001491355 | -0.226842156 | -0.076645052 | RP11-431K24.3         |
| chr14 | 62547769  | 62548443  | 675  | * | 5 | 1.1134E-11  | 0.004737166 | 0.003206632 | 0.002310484 | 0.096324546  | 0.039700722  | SYT16, RP11-355I22.5  |
| chr9  | 101469203 | 101469285 | 83   | * | 2 | 1.34979E-08 | 0.010221284 | 0.003206677 | 0.005017338 | 0.096857047  | 0.05497229   | GABBR2                |
| chr8  | 131325625 | 131326139 | 515  | * | 2 | 2.50009E-10 | 0.000169574 | 0.003208071 | 0.000320507 | -0.087542024 | -0.086971274 | ASAP1                 |
| chr14 | 91544928  | 91544974  | 47   | * | 2 | 1.58352E-10 | 0.000111491 | 0.003208934 | 0.000225867 | 0.130231218  | 0.127774558  | C14orf159             |
| chr4  | 2932265   | 2932447   | 183  | * | 2 | 7.06562E-08 | 0.030942532 | 0.003210603 | 0.007893183 | -0.241238838 | -0.11073982  | MFSD10                |
| chr17 | 17616093  | 17616235  | 143  | * | 2 | 1.99934E-08 | 0.003167209 | 0.003211883 | 0.002660884 | -0.145137214 | -0.085059648 | RAI1                  |
| chr2  | 85730887  | 85731028  | 142  | * | 2 | 3.69578E-08 | 0.003941533 | 0.003211951 | 0.003028797 | 0.138638498  | 0.081974779  |                       |
| chr3  | 128838350 | 128838576 | 227  | * | 2 | 4.09405E-10 | 0.000437947 | 0.003212905 | 0.000681654 | -0.227000381 | -0.13791544  | RAB43, ISY1-RAB43     |

|       |           |           |      |   |    |             |             |             |             |              |              |                              |
|-------|-----------|-----------|------|---|----|-------------|-------------|-------------|-------------|--------------|--------------|------------------------------|
| chr1  | 43854136  | 43855122  | 987  | * | 5  | 5.60071E-18 | 0.095017309 | 0.003216154 | 0.001892045 | -0.237683594 | -0.089916307 | RP1-92O14.6, MED8            |
| chr19 | 10340639  | 10340858  | 220  | * | 3  | 1.02654E-09 | 0.003034753 | 0.003222548 | 0.002585633 | 0.18464375   | 0.095224947  | DNMT1, S1PR2                 |
| chr16 | 88597301  | 88599035  | 1735 | * | 8  | 6.39612E-15 | 5.6576E-05  | 0.003227599 | 6.66337E-05 | 0.20862663   | 0.079694072  | ZFPM1, RP11-21B21.4          |
| chr1  | 154978318 | 154979211 | 894  | * | 3  | 2.48359E-12 | 0.004608353 | 0.003230547 | 0.000373901 | -0.189040492 | -0.099927904 | ZBTB7B                       |
| chr18 | 72187462  | 72187476  | 15   | * | 2  | 3.65509E-11 | 6.08463E-05 | 0.003234572 | 0.000134328 | 0.17727986   | 0.14838811   | CNDP2                        |
| chr17 | 3824384   | 3824599   | 216  | * | 3  | 2.07147E-14 | 6.89445E-06 | 0.003238724 | 2.26068E-05 | 0.130804952  | 0.097978487  |                              |
| chr11 | 77530668  | 77532226  | 1559 | * | 15 | 1.05203E-25 | 0.005506853 | 0.003245366 | 0.00135724  | -0.08717082  | -0.01285506  | AAMDC, RSF1                  |
| chr12 | 117480333 | 117480973 | 641  | * | 2  | 3.34015E-10 | 8.18907E-05 | 0.003250307 | 0.000174002 | 0.221846808  | 0.191882464  | TESC                         |
| chr16 | 88536306  | 88538355  | 2050 | * | 8  | 9.79757E-31 | 7.7484E-12  | 0.003254559 | 3.78659E-10 | 0.152651333  | 0.105376235  | ZFPM1                        |
| chr2  | 70213021  | 70213304  | 284  | * | 2  | 2.43972E-10 | 0.000156785 | 0.003254745 | 0.00030144  | -0.217077204 | -0.181126918 | PCBP1-AS1                    |
| chr2  | 208014177 | 208014670 | 494  | * | 3  | 3.27482E-10 | 0.001692843 | 0.003257663 | 0.001553298 | 0.165370142  | 0.102467257  | KLF7                         |
| chr19 | 11691153  | 11691168  | 16   | * | 2  | 2.14422E-12 | 8.92839E-05 | 0.003259439 | 0.000187525 | -0.173721017 | -0.166256887 | ZNF627                       |
| chr1  | 36906600  | 36907439  | 840  | * | 5  | 3.11218E-15 | 0.000202366 | 0.003259595 | 0.000145974 | -0.134660593 | -0.058202307 | OSCP1                        |
| chr3  | 43821497  | 43821635  | 139  | * | 2  | 6.8955E-10  | 0.000446587 | 0.003263496 | 0.000695348 | 0.213676591  | 0.148476791  |                              |
| chr1  | 158110575 | 158110665 | 91   | * | 3  | 8.38348E-10 | 0.00215457  | 0.003270825 | 0.002109667 | 0.180942304  | 0.088941703  |                              |
| chr14 | 50810773  | 50810863  | 91   | * | 2  | 1.3903E-11  | 8.13637E-05 | 0.003273225 | 0.000173265 | 0.111672721  | 0.091898114  | CDKL1                        |
| chr19 | 55173997  | 55174624  | 628  | * | 6  | 3.43105E-15 | 0.005675898 | 0.00327568  | 0.000617274 | 0.144462516  | 0.054967281  | LILRB4                       |
| chr1  | 184899584 | 184899589 | 6    | * | 2  | 7.43511E-08 | 0.003553413 | 0.003276533 | 0.002878954 | -0.153170269 | -0.117009394 | FAM129A                      |
| chr4  | 105827658 | 105828553 | 896  | * | 5  | 4.39603E-19 | 1.41019E-07 | 0.003281565 | 8.43666E-07 | 0.167394178  | 0.112500998  | RP11-556I14.1, RP11-556I14.2 |
| chr6  | 31846769  | 31847633  | 865  | * | 9  | 1.39483E-20 | 0.000866344 | 0.003284563 | 0.000142195 | 0.175356369  | 0.070860605  | SLC44A4, EHMT2               |
| chr2  | 231089641 | 231091055 | 1415 | * | 9  | 2.14755E-23 | 0.000349359 | 0.003285126 | 2.14512E-05 | -0.211827716 | -0.046474041 | SP140, SP110                 |
| chr3  | 141144475 | 141145231 | 757  | * | 4  | 4.19975E-13 | 0.049872161 | 0.003286146 | 0.001725794 | -0.250688738 | -0.084501104 | ZBTB38                       |
| chr10 | 87676015  | 87676527  | 513  | * | 3  | 3.4219E-08  | 0.03896134  | 0.003287712 | 0.01093838  | 0.148419052  | 0.041325342  | GRID1                        |
| chr5  | 177915909 | 177916440 | 532  | * | 2  | 3.36171E-10 | 0.000409378 | 0.003293514 | 0.000652279 | -0.361693035 | -0.249556573 | COL23A1                      |
| chr1  | 870791    | 871980    | 1190 | * | 8  | 8.60076E-17 | 0.001030534 | 0.003298194 | 0.000615459 | 0.156209096  | 0.110661593  | SAMD11                       |
| chr14 | 58905592  | 58905740  | 149  | * | 3  | 1.14179E-15 | 1.76097E-06 | 0.003301407 | 7.82421E-06 | -0.237243175 | -0.208111721 | KIAA0586                     |
| chr2  | 228678005 | 228678693 | 689  | * | 6  | 1.51989E-15 | 0.040616919 | 0.003302257 | 0.0008254   | -0.255201085 | -0.094559103 | CCL20                        |
| chr3  | 128778575 | 128780916 | 2342 | * | 15 | 6.38562E-28 | 1.60063E-08 | 0.003305604 | 2.09295E-08 | 0.248162938  | 0.058739608  | GP9                          |
| chr12 | 129294939 | 129295649 | 711  | * | 4  | 1.10339E-14 | 6.17368E-05 | 0.003307385 | 0.000110047 | 0.177126442  | 0.085153018  | SLC15A4                      |

|       |           |           |      |   |    |             |             |             |             |              |              |                            |
|-------|-----------|-----------|------|---|----|-------------|-------------|-------------|-------------|--------------|--------------|----------------------------|
| chr12 | 118797525 | 118797962 | 438  | * | 4  | 1.81564E-11 | 0.00689429  | 0.003308578 | 0.001795475 | -0.189874385 | -0.081405874 | TAOK3                      |
| chr3  | 127329123 | 127329458 | 336  | * | 2  | 2.55618E-09 | 0.000669593 | 0.003316184 | 0.000947647 | -0.229682039 | -0.160811659 | MCM2                       |
| chr8  | 21541227  | 21541551  | 325  | * | 3  | 6.80031E-10 | 0.034479022 | 0.003316591 | 0.002715121 | -0.126344828 | -0.065832423 |                            |
| chr16 | 53088123  | 53089351  | 1229 | * | 12 | 3.64019E-17 | 0.002853895 | 0.003319548 | 0.002270746 | -0.069516065 | -0.000637898 | CHD9                       |
| chr20 | 1294814   | 1294858   | 45   | * | 2  | 5.9942E-08  | 0.018164458 | 0.003333795 | 0.006638808 | -0.160076258 | -0.065541757 | SDCBP2                     |
| chr1  | 21896305  | 21896750  | 446  | * | 2  | 2.04094E-12 | 6.30674E-05 | 0.003338222 | 0.000139352 | 0.149566556  | 0.14735372   | ALPL                       |
| chr16 | 66442374  | 66442791  | 418  | * | 2  | 1.58797E-11 | 9.74253E-05 | 0.003339063 | 0.000203035 | 0.23895818   | 0.173727815  | LINC00920                  |
| chr7  | 5523576   | 5523691   | 116  | * | 3  | 1.28809E-09 | 0.003673473 | 0.003340339 | 0.001888834 | -0.195416592 | -0.104096968 | FBXL18                     |
| chr20 | 62133588  | 62133626  | 39   | * | 3  | 2.41397E-11 | 0.000211367 | 0.0033459   | 0.00040776  | 0.137307134  | 0.099543778  |                            |
| chr10 | 134544617 | 134545286 | 670  | * | 3  | 4.24782E-12 | 0.007563353 | 0.003348206 | 0.002273372 | 0.109074205  | 0.062458916  | INPP5A                     |
| chr5  | 148533711 | 148533875 | 165  | * | 2  | 2.08561E-10 | 0.000127654 | 0.003348861 | 0.000255517 | 0.177794509  | 0.034188319  | ABLIM3                     |
| chr10 | 63807168  | 63809170  | 2003 | * | 17 | 1.11719E-40 | 1.25447E-14 | 0.003352575 | 9.67774E-13 | 0.208018243  | 0.087946113  | ARID5B                     |
| chr16 | 21168523  | 21171470  | 2948 | * | 20 | 1.15647E-33 | 2.02657E-05 | 0.003357309 | 9.03033E-07 | -0.298961098 | -0.042157179 | TMEM159, DNAH3             |
| chr22 | 24856594  | 24856877  | 284  | * | 2  | 3.24957E-08 | 0.001849249 | 0.003360668 | 0.001936285 | 0.195062538  | 0.116882541  | ADORA2A-AS1                |
| chr2  | 24715094  | 24715213  | 120  | * | 2  | 1.06811E-09 | 0.000799615 | 0.003362179 | 0.001084288 | -0.045388138 | -0.001906779 | NCOA1                      |
| chr17 | 79297435  | 79298502  | 1068 | * | 5  | 8.52664E-19 | 6.63627E-07 | 0.003365407 | 1.71512E-06 | -0.244846862 | -0.159268179 | TMEM105                    |
| chr1  | 226349343 | 226349364 | 22   | * | 2  | 1.32252E-08 | 0.001349631 | 0.003367125 | 0.001569031 | -0.185495162 | -0.120248009 | ACBD3                      |
| chr4  | 2801717   | 2802612   | 896  | * | 3  | 2.621E-15   | 1.82373E-06 | 0.00337002  | 8.16086E-06 | -0.221851123 | -0.186552466 | SH3BP2                     |
| chr2  | 75184528  | 75185645  | 1118 | * | 10 | 1.68822E-15 | 0.101373337 | 0.003370371 | 0.020423913 | -0.263981982 | -0.034086318 | POLE4                      |
| chr20 | 44986386  | 44988023  | 1638 | * | 4  | 2.72856E-13 | 3.30051E-07 | 0.003373231 | 2.08023E-06 | -0.149891756 | -0.131647745 | SLC35C2                    |
| chr13 | 113355060 | 113355356 | 297  | * | 3  | 1.43791E-08 | 0.07938824  | 0.00337651  | 0.01428801  | 0.149450248  | 0.059466594  | ATP11A                     |
| chr6  | 36665240  | 36665620  | 381  | * | 7  | 1.49121E-20 | 1.30388E-06 | 0.003379034 | 5.67706E-06 | -0.125395487 | -0.07924868  |                            |
| chr1  | 156549200 | 156549533 | 334  | * | 5  | 3.96937E-11 | 0.02721384  | 0.003381079 | 0.003923027 | 0.190270103  | 0.077999614  | TTC24                      |
| chr1  | 57015477  | 57015717  | 241  | * | 2  | 3.49734E-08 | 0.003027898 | 0.003381925 | 0.002655478 | 0.151414547  | 0.096089469  | PPAP2B                     |
| chr16 | 89363811  | 89364225  | 415  | * | 7  | 2.05703E-10 | 0.337237514 | 0.003383769 | 0.054460585 | -0.154264143 | -0.035898924 | AC137932.5, ANKRD11        |
| chr16 | 47048004  | 47048265  | 262  | * | 4  | 3.01765E-09 | 0.033856146 | 0.003387313 | 0.010764374 | -0.135715931 | -0.05624997  | RP11-169E6.4, RP11-169E6.3 |
| chr19 | 22700869  | 22701260  | 392  | * | 2  | 1.82224E-11 | 0.000123805 | 0.003387697 | 0.000249625 | -0.163039041 | -0.152063179 | ZNF98                      |
| chr14 | 101194145 | 101194267 | 123  | * | 2  | 2.29802E-09 | 0.012222623 | 0.003394002 | 0.005649766 | -0.249592624 | -0.155951234 | DLK1                       |
| chr19 | 823662    | 823841    | 180  | * | 2  | 1.04442E-12 | 6.48261E-05 | 0.003394485 | 0.000143151 | -0.195722585 | -0.167683729 |                            |

|       |           |           |      |   |   |             |             |             |             |              |              |                       |
|-------|-----------|-----------|------|---|---|-------------|-------------|-------------|-------------|--------------|--------------|-----------------------|
| chr14 | 92979104  | 92979709  | 606  | * | 5 | 2.69447E-13 | 0.096565102 | 0.003395793 | 0.014446756 | 0.150684991  | 0.031117664  |                       |
| chr17 | 73089282  | 73089425  | 144  | * | 2 | 4.91199E-09 | 0.002115788 | 0.003399643 | 0.00212463  | -0.236134472 | -0.098427204 | SLC16A5               |
| chr19 | 51875451  | 51876788  | 1338 | * | 6 | 5.70529E-13 | 0.01723555  | 0.003399976 | 0.000465109 | -0.261200548 | -0.090251278 | NKG7                  |
| chr1  | 117544206 | 117544416 | 211  | * | 2 | 1.40911E-10 | 0.000234337 | 0.003402705 | 0.000423569 | -0.235648058 | -0.185242078 | CD101                 |
| chr13 | 113242739 | 113243542 | 804  | * | 8 | 1.63294E-19 | 0.016365075 | 0.003405944 | 0.001294201 | -0.244355749 | -0.06796142  |                       |
| chr11 | 72505386  | 72505607  | 222  | * | 2 | 3.62769E-10 | 0.023367321 | 0.003406808 | 0.007439844 | -0.116243187 | -0.06728081  |                       |
| chr1  | 33799703  | 33800886  | 1184 | * | 3 | 2.36868E-10 | 1.37379E-05 | 0.003407406 | 4.17029E-05 | -0.227571484 | -0.110299795 | PHC2                  |
| chr18 | 60645905  | 60646671  | 767  | * | 3 | 1.32791E-13 | 1.59855E-05 | 0.003408291 | 4.49501E-05 | -0.305642713 | -0.141301301 | PHLPP1                |
| chr8  | 144410701 | 144410972 | 272  | * | 3 | 2.61185E-11 | 0.013416406 | 0.003420595 | 0.001233654 | -0.238707493 | -0.126779162 | TOP1MT                |
| chr5  | 173293229 | 173294009 | 781  | * | 4 | 1.92268E-15 | 0.000140598 | 0.003422934 | 7.86306E-05 | -0.190704317 | -0.133741997 |                       |
| chr17 | 32740467  | 32741121  | 655  | * | 3 | 2.48205E-11 | 0.002392772 | 0.003423552 | 0.000659682 | 0.16348633   | 0.097526723  |                       |
| chr1  | 19549300  | 19550005  | 706  | * | 4 | 1.94774E-08 | 0.141778477 | 0.003424728 | 0.030398531 | -0.097857548 | -0.030279052 | RP1-43E13.2, EMC1     |
| chr7  | 124571116 | 124571363 | 248  | * | 3 | 1.02262E-08 | 0.053518415 | 0.003429239 | 0.00924615  | 0.155376639  | 0.076646674  | POT1-AS1              |
| chr10 | 11284548  | 11284602  | 55   | * | 2 | 1.34291E-08 | 0.000992287 | 0.003433    | 0.001275925 | 0.141172345  | 0.098036075  | CELF2                 |
| chr17 | 4852013   | 4852795   | 783  | * | 7 | 1.11573E-15 | 0.001146113 | 0.003437172 | 0.000661897 | -0.061679559 | -0.00988053  | ENO3, PFN1            |
| chr3  | 133970647 | 133971155 | 509  | * | 3 | 2.57468E-09 | 0.142575102 | 0.003438762 | 0.021517363 | 0.152258602  | 0.053382434  |                       |
| chr3  | 101406347 | 101406600 | 254  | * | 3 | 5.06319E-09 | 0.045180121 | 0.003439522 | 0.009237929 | -0.315478528 | -0.115252665 |                       |
| chr17 | 42466567  | 42467307  | 741  | * | 4 | 8.33662E-13 | 0.000430086 | 0.003440393 | 0.00018644  | 0.18025693   | 0.019329446  | ITGA2B                |
| chr3  | 194897309 | 194897437 | 129  | * | 2 | 1.04642E-10 | 0.000403514 | 0.003443571 | 0.000653886 | 0.136022372  | 0.098952311  | XXYLT1                |
| chr3  | 12395554  | 12395914  | 361  | * | 2 | 2.53131E-10 | 0.000155049 | 0.003446004 | 0.000302625 | -0.197058321 | -0.129706607 | PPARG                 |
| chr17 | 455014    | 455636    | 623  | * | 3 | 7.50397E-12 | 0.022872469 | 0.00345063  | 0.001144664 | 0.139784421  | 0.084340012  | VPS53                 |
| chr17 | 78734663  | 78735596  | 934  | * | 7 | 1.13143E-16 | 2.6995E-06  | 0.003450797 | 6.15247E-06 | -0.125924194 | -0.082003381 | RPTOR                 |
| chr3  | 42529630  | 42529667  | 38   | * | 2 | 6.94503E-08 | 0.038671712 | 0.003453739 | 0.00893928  | 0.128476705  | 0.070746595  |                       |
| chr3  | 11266965  | 11267627  | 663  | * | 8 | 1.15353E-19 | 0.007068968 | 0.003453927 | 0.00048308  | -0.329015503 | -0.089831873 | HRH1                  |
| chr17 | 73056681  | 73056797  | 117  | * | 2 | 6.06586E-11 | 0.00119932  | 0.003463002 | 0.001462768 | -0.136372796 | -0.096263073 | KCTD2, RP11-1112G13.3 |
| chr4  | 1729045   | 1729116   | 72   | * | 2 | 4.98977E-10 | 0.000450545 | 0.003463162 | 0.000713252 | -0.109231896 | -0.079943146 | TACC3                 |
| chr2  | 137068792 | 137068818 | 27   | * | 2 | 4.1779E-09  | 0.000493048 | 0.003463747 | 0.000764281 | -0.148858207 | -0.136294999 |                       |
| chr6  | 136847105 | 136847410 | 306  | * | 4 | 3.03776E-10 | 0.029633147 | 0.003465477 | 0.008750698 | -0.11673897  | -0.052148072 | MAP7                  |
| chr5  | 1514077   | 1514608   | 532  | * | 4 | 4.17281E-14 | 0.001746181 | 0.003466051 | 0.000503402 | -0.242621198 | -0.108030029 | LPCAT1                |

|       |           |           |      |   |    |             |             |             |             |              |              |                     |
|-------|-----------|-----------|------|---|----|-------------|-------------|-------------|-------------|--------------|--------------|---------------------|
| chr12 | 93854885  | 93854963  | 79   | * | 2  | 5.50607E-11 | 6.79461E-05 | 0.003466485 | 0.000149693 | -0.168741685 | -0.149355029 |                     |
| chr10 | 99188343  | 99188478  | 136  | * | 2  | 2.23813E-10 | 0.000150958 | 0.003466729 | 0.000296349 | -0.218706126 | -0.193353476 | PGAM1               |
| chr17 | 79459400  | 79459563  | 164  | * | 4  | 1.48467E-08 | 0.085905801 | 0.003467484 | 0.014573242 | -0.488272719 | -0.106622022 |                     |
| chr15 | 100889886 | 100891814 | 1929 | * | 16 | 1.77749E-33 | 0.004468049 | 0.003467549 | 1.36636E-05 | -0.293726104 | -0.045924479 | SPATA41             |
| chr3  | 48228826  | 48230398  | 1573 | * | 12 | 5.4637E-22  | 0.003034781 | 0.003473343 | 0.000373977 | 0.071288223  | 0.015334515  | CDC25A              |
| chr20 | 44538288  | 44540278  | 1991 | * | 15 | 7.54773E-23 | 0.002369884 | 0.003476319 | 9.3864E-05  | -0.227670725 | -0.026898042 | PLTP                |
| chr5  | 14664248  | 14664662  | 415  | * | 6  | 2.54821E-12 | 0.006983152 | 0.003477435 | 0.005296414 | -0.044807123 | -0.009321763 | CTD-2165H16.4       |
| chr4  | 973154    | 973177    | 24   | * | 2  | 1.3179E-09  | 0.000279456 | 0.003483382 | 0.000491101 | -0.235065997 | -0.212391559 | DGKQ, SLC26A1       |
| chr19 | 51104400  | 51105087  | 688  | * | 4  | 1.75127E-11 | 0.003261582 | 0.003484594 | 0.001480791 | 0.208098965  | 0.083867209  |                     |
| chr1  | 243447766 | 243448000 | 235  | * | 2  | 8.78161E-08 | 0.010851706 | 0.003490357 | 0.005434881 | -0.104908252 | -0.069431319 | SDCCAG8             |
| chr18 | 9474143   | 9474234   | 92   | * | 2  | 3.4396E-09  | 0.014210957 | 0.00349184  | 0.006157842 | -0.18068021  | -0.101582172 |                     |
| chr2  | 207999044 | 207999734 | 691  | * | 5  | 6.16654E-16 | 0.028638389 | 0.003495127 | 0.00175191  | -0.223161463 | -0.080508916 | KLF7                |
| chr15 | 64748093  | 64748145  | 53   | * | 2  | 2.0782E-08  | 0.001369136 | 0.003496396 | 0.001609158 | -0.103415913 | -0.101551015 |                     |
| chr5  | 149887008 | 149887787 | 780  | * | 7  | 7.62963E-18 | 0.000478316 | 0.003499969 | 0.000148876 | -0.121233601 | -0.057964631 | NDST1               |
| chr6  | 32050905  | 32051108  | 204  | * | 5  | 6.29733E-14 | 0.031164062 | 0.003501843 | 0.001906867 | 0.100397847  | 0.054511956  | TNXB                |
| chr4  | 1075561   | 1076636   | 1076 | * | 6  | 2.42838E-14 | 0.00078159  | 0.003504378 | 0.000626768 | -0.130322267 | -0.058360846 | RNF212              |
| chr11 | 69294736  | 69295162  | 427  | * | 5  | 4.07422E-12 | 0.007438358 | 0.003510067 | 0.001620097 | 0.209264958  | 0.065023168  |                     |
| chr5  | 66597184  | 66597522  | 339  | * | 2  | 3.64703E-11 | 0.000162643 | 0.003512766 | 0.000316304 | -0.173276446 | -0.130070517 |                     |
| chr22 | 27017087  | 27017910  | 824  | * | 7  | 7.76606E-23 | 5.7441E-05  | 0.00351413  | 1.09602E-05 | 0.154388103  | 0.082633616  |                     |
| chr1  | 160765919 | 160765923 | 5    | * | 2  | 1.57031E-11 | 0.000181665 | 0.003516202 | 0.00034677  | 0.17104087   | 0.14715204   | LY9                 |
| chr6  | 44039484  | 44039689  | 206  | * | 2  | 2.99409E-08 | 0.004977376 | 0.003517359 | 0.003630825 | 0.141164597  | 0.097196407  | RP5-1120P11.1       |
| chr22 | 31668350  | 31668786  | 437  | * | 3  | 1.42245E-08 | 0.018388628 | 0.003517586 | 0.005929374 | -0.315774267 | -0.105169389 | LIMK2               |
| chr17 | 3863976   | 3864217   | 242  | * | 2  | 6.61793E-09 | 0.000834794 | 0.003517772 | 0.001137243 | -0.137516808 | -0.110265881 | ATP2A3              |
| chr12 | 109553359 | 109554634 | 1276 | * | 8  | 3.16353E-17 | 0.031636921 | 0.003518023 | 0.001106901 | -0.229345633 | -0.066557554 | RP11-968O1.5, ACACB |
| chr15 | 29405983  | 29406153  | 171  | * | 5  | 5.85136E-09 | 0.240542294 | 0.003522603 | 0.022861903 | 0.135096888  | 0.028394377  | APBA2               |
| chr20 | 31099338  | 31099384  | 47   | * | 2  | 2.13654E-08 | 0.290107934 | 0.003524075 | 0.012772203 | -0.189018779 | -0.094664394 | C20orf112           |
| chr1  | 115628940 | 115629264 | 325  | * | 2  | 1.52468E-08 | 0.003641899 | 0.003524877 | 0.00303043  | 0.192344257  | 0.106604518  | TSPAN2              |
| chr6  | 131455796 | 131456001 | 206  | * | 2  | 8.41258E-08 | 0.100957689 | 0.003528393 | 0.011465201 | 0.13960477   | 0.068646353  |                     |
| chr1  | 147245168 | 147246154 | 987  | * | 6  | 1.75908E-19 | 0.00035081  | 0.003530439 | 3.85644E-05 | 0.103991371  | 0.048405434  | GJA5                |

|       |           |           |      |   |    |             |             |             |             |              |              |                              |
|-------|-----------|-----------|------|---|----|-------------|-------------|-------------|-------------|--------------|--------------|------------------------------|
| chr1  | 209847618 | 209849006 | 1389 | * | 12 | 8.46554E-16 | 0.13974188  | 0.003532805 | 0.012555897 | -0.153855156 | -0.011595518 | GOS2, RP1-28O10.1            |
| chr17 | 27048223  | 27048708  | 486  | * | 4  | 1.14344E-12 | 0.032903446 | 0.003534802 | 0.007703359 | -0.233923754 | -0.040069498 | RPL23A, AC010761.8           |
| chr1  | 181056127 | 181056912 | 786  | * | 2  | 1.49298E-10 | 0.000169761 | 0.00354192  | 0.000328396 | -0.31810405  | -0.207535577 |                              |
| chr11 | 60930188  | 60930380  | 193  | * | 2  | 5.77236E-11 | 0.001863329 | 0.003542333 | 0.001991332 | -0.292199948 | -0.172698941 |                              |
| chr10 | 17496239  | 17496989  | 751  | * | 5  | 9.56727E-10 | 0.082801069 | 0.003542336 | 0.019113692 | -0.056564749 | -0.018386063 | ST8SIA6                      |
| chr1  | 24053350  | 24053982  | 633  | * | 2  | 6.94701E-10 | 7.14341E-05 | 0.003550006 | 0.000157025 | -0.24472648  | -0.204939122 |                              |
| chr12 | 81332684  | 81332744  | 61   | * | 2  | 1.1683E-07  | 0.018981536 | 0.00355047  | 0.007045435 | -0.181110858 | -0.105031799 | ACSS3                        |
| chr3  | 101707435 | 101707603 | 169  | * | 2  | 1.71474E-08 | 0.001279795 | 0.003555365 | 0.001546408 | -0.185017486 | -0.110016609 | RP11-221J22.1, RP11-221J22.2 |
| chr2  | 47206681  | 47206965  | 285  | * | 2  | 1.95583E-11 | 0.00012287  | 0.003555537 | 0.000250564 | -0.117411763 | -0.097175996 | TTC7A                        |
| chr5  | 108166523 | 108166624 | 102  | * | 2  | 8.91622E-10 | 0.000226182 | 0.003561706 | 0.000416407 | 0.100808373  | 0.083488644  | FER                          |
| chr3  | 142839022 | 142840240 | 1219 | * | 7  | 1.17395E-17 | 0.00022051  | 0.003562118 | 0.000160964 | 0.050543299  | 0.026086913  | CHST2                        |
| chr15 | 89920887  | 89921845  | 959  | * | 12 | 2.69313E-13 | 0.128931065 | 0.003565098 | 0.055135352 | 0.164308334  | 0.026946014  | LINC00925                    |
| chr19 | 45866874  | 45867461  | 588  | * | 6  | 1.97127E-10 | 0.073441735 | 0.003565192 | 0.018156111 | 0.116956628  | 0.017945318  | ERCC2                        |
| chr17 | 1463484   | 1464048   | 565  | * | 3  | 1.01092E-12 | 0.000288584 | 0.003568565 | 0.000343796 | 0.156272331  | 0.109151397  | PITPNA                       |
| chr3  | 52260090  | 52260965  | 876  | * | 8  | 3.94684E-20 | 6.30447E-05 | 0.003569463 | 4.95752E-05 | -0.206152346 | -0.063806631 | TLR9, TLR9                   |
| chr10 | 7221504   | 7221713   | 210  | * | 4  | 1.56729E-11 | 0.000367364 | 0.003572369 | 0.000640854 | 0.13977218   | 0.095642488  | SFMBT2                       |
| chr12 | 25204113  | 25204249  | 137  | * | 2  | 4.78799E-08 | 0.005829466 | 0.003577295 | 0.004001904 | 0.116373957  | 0.044354266  | LRMP                         |
| chr3  | 58200021  | 58200599  | 579  | * | 4  | 9.12359E-12 | 0.005189177 | 0.003581455 | 0.002214844 | -0.314891729 | -0.103708105 | DNASE1L3                     |
| chr1  | 161087200 | 161088678 | 1479 | * | 17 | 1.36529E-19 | 0.065361309 | 0.00358769  | 0.016054947 | 0.049546724  | 0.008097083  | NIT1, PFDN2                  |
| chr9  | 139439761 | 139439826 | 66   | * | 2  | 6.55314E-10 | 0.002689826 | 0.003589131 | 0.002538387 | 0.018511747  | 0.01772793   | NOTCH1                       |
| chr19 | 46095477  | 46095562  | 86   | * | 2  | 6.9962E-09  | 0.006585886 | 0.003594376 | 0.004288013 | -0.165335893 | -0.101955456 | OPA3, GPR4                   |
| chr7  | 156836773 | 156837580 | 808  | * | 4  | 1.3429E-11  | 0.01970239  | 0.003595782 | 0.000985224 | -0.21759428  | -0.013542392 |                              |
| chr17 | 3906640   | 3906858   | 219  | * | 3  | 4.59018E-10 | 0.027759942 | 0.003596428 | 0.007104404 | 0.165772634  | 0.063058511  |                              |
| chr8  | 99437999  | 99438016  | 18   | * | 2  | 1.07302E-10 | 0.000728463 | 0.003596923 | 0.001037455 | -0.180801288 | -0.117164576 | STK3                         |
| chr15 | 74212306  | 74212896  | 591  | * | 3  | 1.27384E-10 | 0.000312527 | 0.003597039 | 0.000503219 | -0.351637069 | -0.151926932 | LOXL1-AS1                    |
| chr11 | 71259251  | 71259881  | 631  | * | 5  | 9.39947E-13 | 0.027606663 | 0.003597945 | 0.002330108 | -0.21204612  | -0.057013971 | KRTAP5-9                     |
| chr9  | 139652617 | 139653003 | 387  | * | 5  | 3.58588E-14 | 0.001000167 | 0.003605565 | 0.000655129 | 0.163605069  | 0.066875691  | LCN8                         |
| chr11 | 121460778 | 121461566 | 789  | * | 5  | 1.7213E-13  | 0.001972861 | 0.003614191 | 0.000963557 | -0.146747819 | -0.064329506 | SORL1                        |
| chr15 | 45473810  | 45474074  | 265  | * | 3  | 4.53305E-11 | 0.000306124 | 0.003614194 | 0.000552937 | -0.165871798 | -0.121971283 | RP11-519G16.2, SHF           |

|       |           |           |      |   |    |             |             |             |             |              |              |                      |
|-------|-----------|-----------|------|---|----|-------------|-------------|-------------|-------------|--------------|--------------|----------------------|
| chr14 | 60671024  | 60671041  | 18   | * | 2  | 2.16468E-09 | 0.000508571 | 0.003618226 | 0.000793516 | -0.197062421 | -0.155749479 |                      |
| chr5  | 137577858 | 137578003 | 146  | * | 3  | 2.06189E-09 | 0.002865427 | 0.003621366 | 0.001984435 | 0.04116325   | 0.012044374  |                      |
| chr19 | 55838021  | 55838191  | 171  | * | 2  | 1.09604E-11 | 0.000244192 | 0.003628115 | 0.000445265 | -0.206362069 | -0.159904084 | TMEM150B             |
| chr15 | 77285359  | 77287906  | 2548 | * | 13 | 6.23529E-16 | 0.00124765  | 0.003628794 | 6.95903E-06 | -0.414214366 | -0.09465274  | PSTPIP1              |
| chr11 | 128392102 | 128393063 | 962  | * | 7  | 2.84716E-12 | 0.016840801 | 0.003629556 | 0.009740921 | -0.026292192 | -0.004304844 | ETS1                 |
| chr2  | 218937172 | 218937635 | 464  | * | 5  | 3.79503E-15 | 0.000763327 | 0.003638424 | 0.000539107 | -0.222230903 | -0.053202935 | RUFY4                |
| chr5  | 140044315 | 140044696 | 382  | * | 4  | 7.83276E-13 | 0.002053745 | 0.003641525 | 0.001126351 | -0.027624795 | -0.000717391 | WDR55                |
| chr12 | 117131523 | 117131988 | 466  | * | 4  | 4.02907E-11 | 0.005095131 | 0.003643026 | 0.002306658 | 0.127081822  | 0.070040001  | RP11-497G19.1        |
| chr1  | 151634388 | 151634697 | 310  | * | 5  | 5.86846E-17 | 8.77975E-05 | 0.003648573 | 2.75924E-05 | -0.274258308 | -0.138567544 | SNX27                |
| chr2  | 28939458  | 28940400  | 943  | * | 2  | 3.98953E-08 | 7.93056E-05 | 0.003652061 | 0.000172861 | -0.232055245 | -0.168774968 | AC097724.3           |
| chr11 | 67069814  | 67071064  | 1251 | * | 13 | 2.99975E-26 | 0.00410225  | 0.003655973 | 0.000211446 | -0.16648789  | -0.042619057 | ANKRD13D, SSH3       |
| chr3  | 181421548 | 181421703 | 156  | * | 2  | 3.06688E-08 | 0.042037656 | 0.003660049 | 0.009566549 | 0.057647928  | 0.044717788  | SOX2-OT              |
| chr14 | 69438267  | 69438358  | 92   | * | 2  | 7.89184E-11 | 7.6989E-05  | 0.003660519 | 0.00016852  | 0.162971496  | 0.142613987  | ACTN1                |
| chr12 | 133020942 | 133021135 | 194  | * | 2  | 2.08202E-08 | 0.020481227 | 0.003663514 | 0.007418601 | 0.197572579  | 0.103945667  |                      |
| chr16 | 30062955  | 30063148  | 194  | * | 3  | 1.04766E-12 | 0.000607237 | 0.003664273 | 0.000328291 | 0.21215209   | 0.112401542  | FAM57B               |
| chr10 | 126390317 | 126390659 | 343  | * | 2  | 1.47682E-09 | 0.007529818 | 0.00366637  | 0.004655944 | -0.148031877 | -0.06018922  | RP11-12J10.3, FAM53B |
| chr11 | 75901632  | 75902270  | 639  | * | 3  | 5.41593E-11 | 0.000230024 | 0.003667774 | 0.000299879 | 0.096201153  | -0.016297066 | RP11-619A14.2, WNT11 |
| chr1  | 160545145 | 160546979 | 1835 | * | 4  | 2.6348E-09  | 2.36015E-05 | 0.003670039 | 4.17515E-05 | 0.145982501  | 0.07790163   | CD84                 |
| chr1  | 116371802 | 116371871 | 70   | * | 2  | 1.15272E-08 | 0.047828511 | 0.003673693 | 0.009964956 | -0.136675674 | -0.075007139 |                      |
| chr22 | 38730793  | 38731297  | 505  | * | 3  | 4.27658E-11 | 0.001408049 | 0.003674373 | 0.001154163 | -0.166302049 | -0.08428746  | CSNK1E               |
| chr14 | 24563095  | 24564438  | 1344 | * | 16 | 2.90166E-24 | 0.059405113 | 0.003676359 | 0.00444443  | -0.03775199  | -0.005309954 | PCK2, NRL            |
| chr2  | 51256078  | 51256146  | 69   | * | 2  | 3.45281E-11 | 0.000414193 | 0.003680033 | 0.000680742 | -0.180528069 | -0.149613654 | NRXN1                |
| chr1  | 145433592 | 145433673 | 82   | * | 2  | 5.89777E-08 | 0.002408571 | 0.003682497 | 0.002394646 | -0.211790654 | -0.125571115 |                      |
| chr7  | 47554427  | 47554571  | 145  | * | 2  | 2.40977E-08 | 0.056491128 | 0.003684154 | 0.010451787 | -0.256547717 | -0.130977854 | TNS3                 |
| chr19 | 40336878  | 40337541  | 664  | * | 8  | 9.61241E-14 | 0.043279827 | 0.003687765 | 0.015210874 | 0.144756152  | 0.020704978  | FBL                  |
| chr14 | 75765352  | 75766014  | 663  | * | 4  | 9.58318E-17 | 5.41458E-06 | 0.003695734 | 1.03404E-05 | -0.312272425 | -0.189608864 |                      |
| chr2  | 10588232  | 10589956  | 1725 | * | 13 | 6.36302E-26 | 0.015387345 | 0.003700296 | 0.000114802 | 0.163742692  | 0.021361795  | RP11-320M2.1, ODC1   |
| chr10 | 135101975 | 135102171 | 197  | * | 2  | 3.36221E-08 | 0.02848478  | 0.00370088  | 0.008472587 | -0.044467561 | -0.026674101 | TUBGCP2              |
| chr11 | 1783832   | 1784413   | 582  | * | 2  | 1.00518E-09 | 0.020482938 | 0.003703958 | 0.007472907 | -0.117062604 | -0.075291559 | CTSD, AC068580.5     |

|       |           |           |      |   |    |             |             |             |             |              |              |                           |
|-------|-----------|-----------|------|---|----|-------------|-------------|-------------|-------------|--------------|--------------|---------------------------|
| chr16 | 28160523  | 28161100  | 578  | * | 2  | 4.9571E-10  | 0.000132253 | 0.003708289 | 0.000269033 | -0.181567305 | -0.114747427 | XPO6                      |
| chr8  | 6735510   | 6735628   | 119  | * | 2  | 2.82303E-10 | 0.000382493 | 0.003708382 | 0.000641061 | -0.228765442 | -0.168579812 | GS1-24F4.2, DEFB1         |
| chr6  | 31660252  | 31661178  | 927  | * | 5  | 5.83686E-17 | 0.000100928 | 0.003713236 | 0.000111469 | 0.172249567  | 0.088423836  | ABHD16A, XXbac-BPG32J3.20 |
| chr1  | 155271423 | 155271762 | 340  | * | 2  | 2.8007E-11  | 0.000711019 | 0.003713704 | 0.001030316 | -0.173713775 | -0.046278396 |                           |
| chr1  | 54852036  | 54852233  | 198  | * | 2  | 9.12586E-08 | 0.027149385 | 0.003718964 | 0.008354014 | 0.13285133   | 0.075225025  | SSBP3                     |
| chr5  | 34042521  | 34044058  | 1538 | * | 9  | 1.09244E-24 | 1.73369E-05 | 0.00372051  | 8.99799E-07 | -0.15918963  | -0.058373363 | RP11-1084J3.4, C1QTNF3    |
| chr3  | 156530417 | 156530658 | 242  | * | 3  | 9.95448E-08 | 0.042859254 | 0.00372103  | 0.012972567 | -0.100515474 | -0.06193037  | LINC00886                 |
| chr9  | 138697196 | 138697959 | 764  | * | 2  | 1.24895E-09 | 7.79837E-05 | 0.003723951 | 0.000170925 | -0.212490781 | -0.036549746 |                           |
| chr13 | 111838017 | 111839335 | 1319 | * | 8  | 1.05619E-20 | 3.87368E-05 | 0.003725323 | 2.1788E-05  | 0.174746895  | 0.053459733  | ARHGEF7                   |
| chr2  | 239197607 | 239197782 | 176  | * | 2  | 2.46217E-08 | 0.00189     | 0.003725386 | 0.002054524 | 0.033631582  | 0.022164576  | PER2                      |
| chr12 | 133336962 | 133337116 | 155  | * | 4  | 5.3599E-09  | 0.070883131 | 0.003728974 | 0.009846746 | 0.164830213  | 0.078631835  | ANKLE2                    |
| chr1  | 179050298 | 179051893 | 1596 | * | 17 | 3.39998E-13 | 0.616753872 | 0.003731738 | 0.044713931 | 0.034934094  | 0.001208496  | TOR3A                     |
| chr19 | 3831806   | 3831859   | 54   | * | 2  | 1.24913E-07 | 0.101799817 | 0.003732045 | 0.012009035 | 0.200137116  | 0.096973595  | ZFR2                      |
| chr7  | 75507337  | 75508496  | 1160 | * | 12 | 2.79574E-14 | 0.595756201 | 0.003733684 | 0.061575115 | 0.064264571  | 0.009411321  | RHBDD2                    |
| chr5  | 118741167 | 118741229 | 63   | * | 2  | 1.54657E-08 | 0.0009452   | 0.003734077 | 0.001271645 | 0.094530146  | 0.086359286  |                           |
| chr5  | 176966237 | 176966387 | 151  | * | 2  | 1.84083E-08 | 0.005696664 | 0.00373523  | 0.004044263 | -0.3589327   | -0.1482218   | FAM193B                   |
| chr4  | 128701638 | 128704651 | 3014 | * | 14 | 1.53946E-11 | 0.031385704 | 0.003735245 | 0.000240119 | -0.242281572 | -0.028263535 | HSPA4L                    |
| chr22 | 38484884  | 38485757  | 874  | * | 5  | 5.05893E-11 | 0.01903744  | 0.003735937 | 0.011357226 | 0.086361827  | 0.053880281  | BAIAP2L2                  |
| chr13 | 77030645  | 77030775  | 131  | * | 2  | 2.44317E-09 | 0.000541605 | 0.003737018 | 0.000841165 | 0.113333443  | 0.111707167  |                           |
| chr22 | 45608345  | 45610231  | 1887 | * | 15 | 3.18684E-36 | 0.008861313 | 0.003748048 | 2.37218E-05 | -0.278354972 | -0.031384525 | KIAA0930                  |
| chr1  | 16840801  | 16840816  | 16   | * | 2  | 1.21691E-09 | 0.000240587 | 0.003749643 | 0.00044361  | 0.063572316  | 0.054471139  |                           |
| chr10 | 82296191  | 82296516  | 326  | * | 2  | 1.40981E-09 | 0.012765153 | 0.003754881 | 0.006135147 | -0.159392508 | -0.099417922 |                           |
| chr16 | 72041376  | 72042695  | 1320 | * | 10 | 1.1866E-16  | 0.392040225 | 0.003756702 | 0.015257033 | -0.426829212 | -0.044877438 | DHODH                     |
| chr20 | 30001044  | 30001697  | 654  | * | 3  | 6.09253E-10 | 0.052381628 | 0.003757008 | 0.014027091 | 0.200995777  | 0.057541182  |                           |
| chr19 | 35485361  | 35485586  | 226  | * | 5  | 2.05627E-11 | 0.090841624 | 0.003763743 | 0.003913067 | -0.133114298 | -0.054464674 |                           |
| chr4  | 40464575  | 40464664  | 90   | * | 3  | 7.93457E-11 | 0.00026393  | 0.003768526 | 0.000394606 | -0.252038186 | -0.139626677 | RBM47                     |
| chr19 | 49954994  | 49955555  | 562  | * | 5  | 1.81047E-15 | 0.003372173 | 0.003770448 | 0.002710961 | 0.095090884  | 0.026297366  | PIH1D1                    |
| chr15 | 58624344  | 58624534  | 191  | * | 2  | 1.65917E-08 | 0.086989882 | 0.003772015 | 0.01175848  | -0.050787117 | -0.030110303 | ALDH1A2                   |
| chr16 | 3630187   | 3631153   | 967  | * | 5  | 4.1199E-14  | 0.004495295 | 0.003774857 | 0.002025417 | -0.208719584 | -0.058794614 |                           |



|       |           |           |      |   |    |             |             |             |             |              |              |                        |
|-------|-----------|-----------|------|---|----|-------------|-------------|-------------|-------------|--------------|--------------|------------------------|
| chr8  | 38830814  | 38832335  | 1522 | * | 12 | 3.91255E-17 | 0.005791573 | 0.003775306 | 0.001111159 | -0.17657747  | -0.056542506 | PLEKHA2, HTRA4         |
| chr8  | 17014337  | 17014845  | 509  | * | 3  | 5.88535E-13 | 8.13965E-05 | 0.003779711 | 0.000159645 | -0.054820516 | 0.001135376  | ZDHHC2                 |
| chr5  | 168218017 | 168218392 | 376  | * | 2  | 5.39624E-10 | 0.003587375 | 0.00378615  | 0.003111118 | -0.175293591 | -0.126958897 | SLIT3                  |
| chr2  | 26243148  | 26243460  | 313  | * | 2  | 3.01078E-09 | 0.000526873 | 0.003790822 | 0.000827356 | 0.130477161  | 0.010814459  |                        |
| chr16 | 30751795  | 30751899  | 105  | * | 2  | 2.47849E-08 | 0.007870186 | 0.003796071 | 0.004859783 | 0.118544167  | 0.03691208   | SRCAP                  |
| chr6  | 36724036  | 36725742  | 1707 | * | 5  | 1.26938E-13 | 0.000110886 | 0.003800145 | 2.56129E-05 | 0.203048004  | 0.096072466  | CPNE5                  |
| chr20 | 35972070  | 35972536  | 467  | * | 4  | 1.37309E-12 | 0.001225784 | 0.003814508 | 0.001006305 | 0.130993285  | 0.066644174  |                        |
| chr19 | 39217856  | 39218661  | 806  | * | 6  | 2.04797E-11 | 0.162784835 | 0.003817331 | 0.017350781 | 0.106661987  | 0.042298158  | ACTN4                  |
| chr17 | 43306622  | 43306802  | 181  | * | 2  | 1.09422E-10 | 8.38719E-05 | 0.003827706 | 0.000182996 | -0.179538948 | -0.170632798 | FMNL1                  |
| chr4  | 8242386   | 8242745   | 360  | * | 3  | 1.23798E-11 | 0.008931641 | 0.003831844 | 0.000601033 | -0.084788233 | -0.058334091 | SH3TC1                 |
| chr7  | 99102011  | 99103043  | 1033 | * | 16 | 1.06849E-17 | 0.007695414 | 0.003835829 | 0.010885235 | -0.041811257 | -0.009957732 | ZKSCAN5                |
| chr13 | 111317935 | 111318640 | 706  | * | 5  | 1.86873E-13 | 0.000109336 | 0.003840103 | 0.000168861 | -0.25481615  | -0.100810325 | CARS2                  |
| chr11 | 66046770  | 66047229  | 460  | * | 2  | 4.71211E-15 | 0.000307618 | 0.003842019 | 0.000544598 | 0.113427862  | 0.110244229  | CNIH2                  |
| chr3  | 185543470 | 185544216 | 747  | * | 5  | 6.31336E-16 | 0.00144162  | 0.003842217 | 0.000174744 | 0.130258938  | 0.00974389   |                        |
| chr5  | 71776744  | 71776849  | 106  | * | 2  | 4.6499E-11  | 8.60232E-05 | 0.003844781 | 0.000187223 | -0.14966774  | -0.14432398  | ZNF366                 |
| chr8  | 29939956  | 29941333  | 1378 | * | 12 | 1.51899E-17 | 0.051263861 | 0.003846953 | 0.004553724 | 0.049250067  | 0.003050357  | RP11-489E7.4, TMEM66   |
| chr16 | 87339553  | 87339877  | 325  | * | 4  | 2.40503E-16 | 3.58151E-06 | 0.00385995  | 1.15702E-05 | 0.174217116  | 0.132261857  | C16orf95, RP11-178L8.4 |
| chr12 | 120105885 | 120106292 | 408  | * | 4  | 3.77476E-09 | 0.070587782 | 0.003862038 | 0.019719877 | -0.044132152 | -0.00777475  | PRKAB1                 |
| chr10 | 12648032  | 12648526  | 495  | * | 4  | 1.92779E-11 | 0.001158234 | 0.003865628 | 0.0007591   | -0.185579744 | -0.089881136 | CAMK1D                 |
| chr8  | 23605543  | 23605601  | 59   | * | 3  | 4.27564E-09 | 0.001788673 | 0.003868919 | 0.001881782 | 0.047460731  | 0.043239514  | RP11-175E9.1           |
| chr5  | 180630287 | 180630434 | 148  | * | 2  | 9.40861E-08 | 0.188641238 | 0.003871736 | 0.013438925 | -0.217606258 | -0.109803623 | TRIM7                  |
| chr14 | 102315629 | 102316107 | 479  | * | 2  | 8.07691E-10 | 0.000247287 | 0.003872073 | 0.000457335 | 0.181719048  | 0.050213909  | PPP2R5C                |
| chr17 | 3594952   | 3595341   | 390  | * | 3  | 9.51203E-09 | 0.073525211 | 0.003874206 | 0.00771898  | -0.084114122 | -0.010330478 | P2RX5-TAX1BP3, P2RX5   |
| chr16 | 31488852  | 31489209  | 358  | * | 3  | 2.77926E-11 | 0.00075287  | 0.003875049 | 0.000761036 | -0.241840571 | -0.113444194 | TGFB11                 |
| chr4  | 88452108  | 88452259  | 152  | * | 3  | 4.95392E-13 | 0.000336801 | 0.00387551  | 0.000382867 | -0.164043028 | -0.015873949 | SPARCL1                |
| chr16 | 85568220  | 85569506  | 1287 | * | 5  | 2.05847E-12 | 1.69838E-05 | 0.003877694 | 5.55001E-06 | 0.148413652  | 0.004402605  |                        |
| chr19 | 18315067  | 18315256  | 190  | * | 2  | 1.1912E-07  | 0.001095473 | 0.003882836 | 0.001434396 | -0.102399966 | -0.061357293 |                        |
| chr17 | 78755379  | 78755841  | 463  | * | 5  | 3.14883E-20 | 0.000228353 | 0.003883617 | 4.92242E-05 | -0.175059429 | -0.070901239 | RPTOR                  |
| chr4  | 75858510  | 75858589  | 80   | * | 2  | 1.47955E-08 | 0.032919278 | 0.003883729 | 0.009220282 | 0.012059601  | 0.00878647   | PARM1                  |

|       |           |           |      |   |    |             |             |             |             |              |              |                      |
|-------|-----------|-----------|------|---|----|-------------|-------------|-------------|-------------|--------------|--------------|----------------------|
| chr3  | 194906043 | 194906452 | 410  | * | 3  | 1.10607E-11 | 0.001266223 | 0.003887582 | 0.000789973 | -0.282517054 | -0.144302677 | XXYLT1               |
| chr10 | 5938186   | 5938657   | 472  | * | 2  | 1.38377E-09 | 0.000402467 | 0.003900565 | 0.000677061 | 0.169257667  | 0.122387524  | FBXO18               |
| chr10 | 103826480 | 103826705 | 226  | * | 2  | 4.23545E-08 | 0.009201554 | 0.003906928 | 0.005355639 | 0.11639628   | 0.051314781  | HPS6                 |
| chr2  | 241501875 | 241502462 | 588  | * | 2  | 1.45239E-11 | 0.000146482 | 0.003912731 | 0.000296654 | 0.142733898  | 0.118480011  | DUSP28, ANKMY1       |
| chr2  | 48795994  | 48796213  | 220  | * | 3  | 3.98513E-09 | 0.013083343 | 0.003917505 | 0.004461549 | -0.164959362 | -0.077742715 | STON1, STON1-GTF2A1L |
| chr7  | 36700744  | 36701016  | 273  | * | 4  | 1.60095E-09 | 0.00741488  | 0.00391811  | 0.00363081  | -0.152800642 | -0.047553487 | AOAH                 |
| chr11 | 67266128  | 67266176  | 49   | * | 2  | 9.95545E-11 | 8.60102E-05 | 0.003921858 | 0.000187849 | 0.15311142   | 0.120053229  | PITPNM1              |
| chr8  | 134310304 | 134310718 | 415  | * | 4  | 3.68575E-14 | 0.001423003 | 0.003921862 | 0.000534083 | -0.137707504 | -0.070158506 | NDRG1                |
| chr16 | 85676292  | 85676861  | 570  | * | 5  | 2.51481E-16 | 0.000240485 | 0.003926753 | 7.99746E-05 | 0.200953583  | 0.088706845  | GSE1                 |
| chr6  | 18155101  | 18155916  | 816  | * | 9  | 3.98747E-16 | 0.001409401 | 0.00394163  | 0.000862897 | -0.103339748 | -0.025270192 | KDM1B, TPMT          |
| chr19 | 45999794  | 46000819  | 1026 | * | 9  | 6.97016E-13 | 0.050162673 | 0.003948969 | 0.010219399 | -0.091244124 | -0.017320853 | PPM1N, RTN2          |
| chr13 | 114871422 | 114872102 | 681  | * | 4  | 1.28546E-14 | 0.000404759 | 0.003949483 | 0.00023771  | 0.167928553  | 0.105153368  | RASA3                |
| chr1  | 116653093 | 116653561 | 469  | * | 3  | 1.04441E-13 | 0.005816388 | 0.003950857 | 0.000524792 | -0.179355944 | -0.09230878  |                      |
| chr2  | 138721303 | 138721868 | 566  | * | 8  | 1.22767E-11 | 0.166198055 | 0.003951084 | 0.018252761 | 0.245216356  | 0.046790789  | HNMT                 |
| chr10 | 106088702 | 106089307 | 606  | * | 6  | 6.35986E-22 | 3.93383E-06 | 0.003952588 | 1.43343E-06 | -0.20252448  | -0.067517382 | ITPRIP               |
| chr14 | 88459216  | 88461489  | 2274 | * | 19 | 5.06763E-27 | 0.00848266  | 0.003952743 | 2.28819E-05 | -0.390772581 | -0.041319693 | GALC                 |
| chr10 | 11191659  | 11191891  | 233  | * | 3  | 2.2059E-10  | 0.009847423 | 0.003959745 | 0.002130306 | -0.131612688 | -0.077677286 | CELF2                |
| chr5  | 176931315 | 176931422 | 108  | * | 3  | 8.2808E-08  | 0.085225145 | 0.003963302 | 0.016160429 | -0.073822375 | -0.030224273 | DOK3                 |
| chr2  | 64863301  | 64864645  | 1345 | * | 6  | 8.01316E-19 | 9.23864E-08 | 0.003965142 | 6.9847E-07  | -0.173548071 | -0.096725379 | SERTAD2              |
| chr16 | 88539861  | 88540992  | 1132 | * | 7  | 6.5205E-16  | 1.35746E-05 | 0.003966617 | 4.08123E-05 | 0.24311488   | 0.125910404  | ZFPM1                |
| chr15 | 40802888  | 40803733  | 846  | * | 4  | 2.74926E-10 | 0.015767586 | 0.003966782 | 0.006650618 | -0.23040703  | -0.074127658 | RP11-111A22.1        |
| chr2  | 145188144 | 145189636 | 1493 | * | 3  | 1.49638E-10 | 7.26215E-06 | 0.003967035 | 2.61231E-05 | 0.190068125  | 0.136469832  | ZEB2                 |
| chr10 | 116286411 | 116286911 | 501  | * | 6  | 2.50385E-11 | 0.03965288  | 0.003970028 | 0.008927847 | -0.039956192 | -0.010504086 | ABLIM1               |
| chr17 | 46712052  | 46712086  | 35   | * | 2  | 7.87417E-12 | 0.000170549 | 0.003972769 | 0.000338314 | 0.2124597    | 0.187665106  | HOXB-AS4             |
| chr17 | 74639731  | 74640078  | 348  | * | 6  | 7.6599E-21  | 5.16057E-06 | 0.003973801 | 2.41085E-06 | 0.18292951   | 0.108745301  | ST6GALNAC1           |
| chr2  | 242699863 | 242699892 | 30   | * | 2  | 1.89754E-08 | 0.006649011 | 0.003974308 | 0.004554974 | -0.17372284  | -0.096110231 | D2HGDH               |
| chr13 | 28371000  | 28371547  | 548  | * | 4  | 4.36473E-11 | 0.004137936 | 0.003975269 | 0.002750992 | 0.074699934  | 0.03991321   |                      |
| chr8  | 21776623  | 21777941  | 1319 | * | 10 | 3.22195E-15 | 0.03129419  | 0.003976047 | 0.003425672 | -0.082121687 | -0.018553867 | XPO7                 |
| chr13 | 114828264 | 114829833 | 1570 | * | 6  | 1.13874E-11 | 0.001563306 | 0.003988739 | 0.000464101 | -0.244550379 | -0.079003049 | RASA3                |

|       |           |           |      |   |    |             |             |             |             |              |              |                  |
|-------|-----------|-----------|------|---|----|-------------|-------------|-------------|-------------|--------------|--------------|------------------|
| chr3  | 46131480  | 46131862  | 383  | * | 2  | 5.00575E-11 | 0.000136484 | 0.003990095 | 0.00028052  | -0.235799778 | -0.067655332 |                  |
| chr17 | 79824551  | 79825218  | 668  | * | 3  | 1.17158E-13 | 5.30673E-05 | 0.003995984 | 0.000106601 | 0.135069838  | -0.021279345 |                  |
| chr2  | 68348223  | 68348450  | 228  | * | 2  | 1.49732E-08 | 0.002141769 | 0.003998046 | 0.002301237 | 0.103205569  | 0.088139678  |                  |
| chr10 | 130338213 | 130339475 | 1263 | * | 11 | 9.123E-15   | 0.259862626 | 0.003998107 | 0.036878474 | -0.052725987 | 0.009401297  |                  |
| chr4  | 6781565   | 6782128   | 564  | * | 3  | 4.67667E-12 | 0.000810385 | 0.003998691 | 0.000718767 | -0.130426356 | 0.007112167  |                  |
| chr7  | 55621099  | 55621712  | 614  | * | 5  | 6.25067E-14 | 0.01351159  | 0.003999341 | 0.006273056 | 0.137547104  | 0.05592347   | VOPP1            |
| chr5  | 77882104  | 77882454  | 351  | * | 3  | 6.45008E-11 | 0.034782043 | 0.004005681 | 0.001126479 | -0.151728043 | -0.090426628 | LHFPL2           |
| chr4  | 183728479 | 183729461 | 983  | * | 6  | 4.61381E-12 | 0.011042969 | 0.004011455 | 0.006051185 | -0.18647503  | -0.087113301 |                  |
| chr8  | 11720161  | 11720363  | 203  | * | 3  | 3.06247E-10 | 0.001253933 | 0.004017225 | 0.001334353 | -0.066009685 | -0.064362741 | CTSB             |
| chr11 | 36432567  | 36433057  | 491  | * | 2  | 7.8564E-11  | 0.000467507 | 0.004022503 | 0.000768201 | -0.14819404  | -0.12708016  | PRR5L            |
| chr15 | 52030001  | 52031467  | 1467 | * | 9  | 1.26824E-26 | 6.84826E-06 | 0.004023701 | 3.76178E-06 | 0.17950159   | 0.056831715  | LYSMD2           |
| chr20 | 62085851  | 62086790  | 940  | * | 4  | 3.15231E-13 | 1.98895E-05 | 0.004024519 | 6.40222E-05 | 0.128437917  | 0.106060111  | KCNQ2            |
| chr1  | 32739049  | 32739493  | 445  | * | 2  | 9.99482E-11 | 0.12481923  | 0.004025403 | 0.01319586  | 0.088170264  | 0.041082179  | LCK              |
| chr2  | 102798651 | 102798966 | 316  | * | 4  | 5.48819E-11 | 0.007888429 | 0.004028254 | 0.001922823 | -0.054156335 | -0.017462997 |                  |
| chr22 | 44575455  | 44576268  | 814  | * | 4  | 7.10815E-10 | 0.015762703 | 0.004031882 | 0.002626051 | -0.189014446 | -0.08343858  | PARVG            |
| chr2  | 234261725 | 234262993 | 1269 | * | 12 | 5.53555E-19 | 0.009409338 | 0.004033267 | 0.002361741 | 0.151054977  | 0.023096189  | RP11-400N9.1     |
| chr10 | 73472315  | 73472531  | 217  | * | 3  | 1.90246E-09 | 0.008860435 | 0.004033676 | 0.005290452 | -0.144053024 | -0.077211785 | CDH23, C10orf105 |
| chr10 | 11943616  | 11944468  | 853  | * | 3  | 1.01131E-10 | 7.08252E-05 | 0.004034139 | 0.000123849 | 0.213859045  | 0.13210539   |                  |
| chr16 | 2054944   | 2055684   | 741  | * | 5  | 7.11429E-12 | 0.026666238 | 0.004037138 | 0.00322797  | -0.116217424 | -0.063692795 | ZNF598           |
| chr10 | 28550201  | 28550572  | 372  | * | 3  | 1.14171E-09 | 0.006931409 | 0.004044963 | 0.002328482 | 0.197551551  | 0.096148382  | MPP7             |
| chr16 | 11473477  | 11473669  | 193  | * | 2  | 9.80489E-09 | 0.000755325 | 0.004045889 | 0.001109654 | -0.159075182 | -0.025812046 | CTD-3088G3.8     |
| chr12 | 6657744   | 6659770   | 2027 | * | 13 | 1.30282E-25 | 1.1486E-07  | 0.00404899  | 6.01203E-09 | -0.222042779 | -0.073526254 | IFFO1            |
| chr20 | 1745259   | 1745769   | 511  | * | 3  | 6.94771E-09 | 0.006493925 | 0.004049538 | 0.004559442 | -0.149743572 | -0.032814003 |                  |
| chr2  | 114384894 | 114385169 | 276  | * | 3  | 1.05313E-08 | 0.007316381 | 0.004051579 | 0.004614247 | 0.027285801  | 0.015778935  | RABL2A           |
| chr16 | 85435739  | 85435753  | 15   | * | 2  | 4.40453E-08 | 0.001460956 | 0.004059914 | 0.001787352 | 0.183654894  | 0.147130403  |                  |
| chr4  | 152608012 | 152608770 | 759  | * | 5  | 2.83353E-13 | 0.014863788 | 0.004060043 | 0.001847212 | 0.127269918  | 0.054225415  | PET112           |
| chr12 | 1058210   | 1059459   | 1250 | * | 12 | 9.61038E-26 | 0.000109598 | 0.00406022  | 8.86364E-06 | -0.046488262 | 0.003064985  | RAD52            |
| chr1  | 24120017  | 24120115  | 99   | * | 3  | 1.36193E-07 | 0.208682442 | 0.004064412 | 0.027000149 | -0.16400458  | -0.058652314 | LYPLA2           |
| chr5  | 175982402 | 175982645 | 244  | * | 3  | 1.06398E-10 | 0.001634263 | 0.004066523 | 0.000719604 | -0.236775953 | -0.09639342  | CDHR2            |

|       |           |           |      |   |    |             |             |             |             |              |              |                      |
|-------|-----------|-----------|------|---|----|-------------|-------------|-------------|-------------|--------------|--------------|----------------------|
| chr19 | 46031516  | 46033285  | 1770 | * | 6  | 6.88043E-16 | 2.74788E-05 | 0.004071253 | 7.11626E-06 | 0.205498417  | -0.014479765 | OPA3                 |
| chr20 | 6035902   | 6035997   | 96   | * | 2  | 1.68324E-13 | 0.000106865 | 0.004076983 | 0.000228384 | 0.179987325  | 0.164004185  |                      |
| chr5  | 175116770 | 175117129 | 360  | * | 2  | 6.94315E-09 | 0.001657028 | 0.004084983 | 0.001954308 | -0.280011871 | -0.168999223 |                      |
| chr21 | 37757070  | 37757240  | 171  | * | 3  | 1.77345E-11 | 0.011636971 | 0.004090185 | 0.002262036 | 0.138543833  | 0.076133803  | MORC3                |
| chr19 | 847943    | 848026    | 84   | * | 3  | 4.03355E-13 | 1.3851E-05  | 0.004096754 | 4.70429E-05 | -0.193566741 | -0.163890839 | PRTN3                |
| chr17 | 76170799  | 76171208  | 410  | * | 3  | 4.04636E-10 | 0.150875402 | 0.004098412 | 0.024359369 | -0.20535982  | -0.055632325 | TK1                  |
| chr16 | 87871160  | 87871219  | 60   | * | 2  | 6.76123E-10 | 0.000553859 | 0.004100993 | 0.000881077 | 0.237608391  | 0.166626027  | RP4-536B24.2, SLC7A5 |
| chr12 | 116586872 | 116587387 | 516  | * | 4  | 3.31446E-13 | 0.002077541 | 0.004101279 | 0.000415018 | 0.199267575  | 0.09438035   | MED13L               |
| chr8  | 141046436 | 141046852 | 417  | * | 5  | 1.59604E-14 | 0.000153265 | 0.00410412  | 0.000166231 | 0.124572827  | 0.078477893  | TRAPPC9              |
| chr8  | 110356640 | 110357011 | 372  | * | 3  | 6.75929E-12 | 0.001528137 | 0.004107249 | 0.00044525  | 0.189753801  | 0.129748329  | ENY2                 |
| chr3  | 128368930 | 128370463 | 1534 | * | 14 | 3.48965E-28 | 1.06725E-06 | 0.004110608 | 5.79968E-07 | -0.324560097 | -0.038376673 | RPN1                 |
| chr13 | 48890413  | 48890459  | 47   | * | 2  | 2.03511E-08 | 0.00212295  | 0.00411264  | 0.002316033 | 0.168513076  | 0.149322419  | RB1                  |
| chr2  | 9340871   | 9341171   | 301  | * | 3  | 2.97386E-12 | 0.000139448 | 0.004116221 | 0.000182196 | 0.177819601  | 0.123614953  |                      |
| chr3  | 122829800 | 122830175 | 376  | * | 2  | 2.29378E-10 | 0.000100494 | 0.004117034 | 0.000216929 | 0.161208014  | 0.152443586  | PDIA5                |
| chr1  | 206945034 | 206946595 | 1562 | * | 9  | 3.88057E-27 | 7.99245E-08 | 0.004119599 | 2.18408E-07 | -0.248719714 | -0.103958239 | IL10                 |
| chr17 | 38084119  | 38085536  | 1418 | * | 7  | 1.2344E-12  | 0.004926405 | 0.004128324 | 0.001635058 | 0.212043763  | 0.089707712  | RP11-387H17.4        |
| chr4  | 154449090 | 154449177 | 88   | * | 2  | 3.05632E-10 | 0.000121877 | 0.004129215 | 0.00025638  | -0.292304517 | -0.249626801 | KIAA0922             |
| chr13 | 30938773  | 30939971  | 1199 | * | 4  | 9.96521E-16 | 0.000338452 | 0.004138732 | 0.000191942 | 0.150700412  | 0.09172      | LINC00426            |
| chr10 | 3938517   | 3939127   | 611  | * | 3  | 7.02853E-14 | 0.000539371 | 0.004140294 | 0.000377217 | -0.309494947 | -0.204847028 |                      |
| chr9  | 130524573 | 130526319 | 1747 | * | 11 | 1.62E-14    | 0.004955549 | 0.00414391  | 0.00081463  | 0.173240886  | -0.000229885 | SH2D3C               |
| chr22 | 31479561  | 31479615  | 55   | * | 2  | 9.41832E-08 | 0.141083248 | 0.004144403 | 0.01375213  | 0.144221454  | 0.075671991  | SMTN                 |
| chr8  | 142106211 | 142106775 | 565  | * | 2  | 3.32265E-10 | 0.000100105 | 0.004145896 | 0.000216472 | -0.173972393 | -0.142367729 |                      |
| chr20 | 60769534  | 60769785  | 252  | * | 2  | 1.59844E-10 | 0.000223026 | 0.004146968 | 0.00042719  | -0.24074703  | -0.188279289 | MTG2                 |
| chr1  | 150971753 | 150971889 | 137  | * | 2  | 9.68873E-11 | 0.000102678 | 0.004147248 | 0.000221305 | -0.10866293  | -0.08045306  | FAM63A               |
| chr22 | 43484984  | 43485702  | 719  | * | 13 | 1.04196E-15 | 0.169362227 | 0.004151682 | 0.021410601 | -0.16552449  | -0.005468255 | TTLL1                |
| chr3  | 5137549   | 5137953   | 405  | * | 4  | 1.48809E-10 | 0.005538297 | 0.00415355  | 0.003064809 | 0.05941417   | 0.036198144  |                      |
| chr13 | 29156897  | 29157266  | 370  | * | 2  | 7.65812E-09 | 0.004167936 | 0.004154785 | 0.00356532  | -0.082707715 | -0.054200424 |                      |
| chr17 | 4854754   | 4854972   | 219  | * | 3  | 2.45345E-08 | 0.014530838 | 0.004155016 | 0.007291231 | 0.169556702  | 0.088184636  | ENO3                 |
| chr5  | 86176688  | 86177200  | 513  | * | 2  | 2.37539E-09 | 0.000448303 | 0.004158969 | 0.000750754 | 0.127537028  | 0.089163443  |                      |

|       |           |           |      |   |    |             |             |             |             |              |              |                      |
|-------|-----------|-----------|------|---|----|-------------|-------------|-------------|-------------|--------------|--------------|----------------------|
| chr17 | 6616351   | 6617470   | 1120 | * | 14 | 8.19354E-15 | 0.20167395  | 0.004164156 | 0.006259857 | 0.109195834  | 0.015744559  | SLC13A5              |
| chr15 | 75917396  | 75919788  | 2393 | * | 20 | 2.76298E-15 | 0.047422477 | 0.004164393 | 0.002100731 | -0.341259863 | -0.013530197 | CTD-2026K11.3, SNUPN |
| chr13 | 41136994  | 41137894  | 901  | * | 5  | 4.60419E-13 | 0.104820984 | 0.004165139 | 0.004673514 | -0.193990072 | -0.053820585 | FOXO1                |
| chr12 | 120114103 | 120114603 | 501  | * | 2  | 3.19131E-10 | 0.000106265 | 0.004166395 | 0.000228178 | 0.142547426  | 0.116579353  | PRKAB1               |
| chr19 | 46170845  | 46171507  | 663  | * | 8  | 3.64499E-18 | 0.016213392 | 0.00416642  | 0.000747848 | -0.21937649  | -0.043443119 | GIPR                 |
| chr19 | 54877455  | 54878038  | 584  | * | 5  | 2.45696E-16 | 0.002269506 | 0.004168718 | 0.00127379  | -0.327306203 | -0.101262431 | LAIR1                |
| chr2  | 232044866 | 232045255 | 390  | * | 2  | 9.59721E-09 | 0.001218247 | 0.004173605 | 0.001589954 | -0.202500375 | -0.088654463 |                      |
| chr8  | 38275151  | 38275192  | 42   | * | 2  | 4.18747E-10 | 0.000182063 | 0.004175626 | 0.000361303 | -0.114497162 | -0.082594259 | FGFR1                |
| chr1  | 202975059 | 202975221 | 163  | * | 2  | 2.2414E-08  | 0.005378671 | 0.004187749 | 0.004158398 | -0.27235782  | -0.16542033  |                      |
| chr7  | 44180931  | 44181092  | 162  | * | 3  | 5.3691E-08  | 0.04298574  | 0.004193766 | 0.010491821 | 0.129580599  | 0.062152745  | MYL7                 |
| chr17 | 43224158  | 43224934  | 777  | * | 10 | 1.22233E-15 | 0.084243759 | 0.004193824 | 0.00928743  | -0.231303217 | -0.012740786 | HEXIM1               |
| chr17 | 28704799  | 28707461  | 2663 | * | 14 | 6.60728E-16 | 0.001481386 | 0.004197763 | 0.000105316 | -0.141787483 | -0.010998263 | CPD                  |
| chr10 | 43932149  | 43932570  | 422  | * | 7  | 4.61665E-10 | 0.069970553 | 0.004199479 | 0.021404413 | 0.025451723  | 0.006690258  | ZNF487               |
| chr6  | 6915600   | 6916301   | 702  | * | 3  | 1.82029E-09 | 0.002321934 | 0.004199521 | 0.002516339 | -0.259415941 | -0.115565417 | RP3-429O6.1          |
| chr11 | 128636211 | 128636703 | 493  | * | 2  | 3.19668E-09 | 0.000558388 | 0.004201982 | 0.000893313 | 0.125688483  | 0.104025289  | FLI1                 |
| chr11 | 18719308  | 18719488  | 181  | * | 2  | 1.41705E-08 | 0.042833838 | 0.004207315 | 0.010644153 | -0.211953213 | -0.10873254  | TMEM86A              |
| chr19 | 5074224   | 5074758   | 535  | * | 4  | 4.6183E-15  | 7.5678E-06  | 0.004209989 | 2.5851E-05  | -0.182750366 | -0.109185136 | KDM4B                |
| chr2  | 99280007  | 99280963  | 957  | * | 6  | 1.6002E-17  | 0.001079832 | 0.004211999 | 2.55435E-05 | -0.321879618 | -0.076731897 | MGAT4A               |
| chr6  | 3068257   | 3069545   | 1289 | * | 5  | 1.17553E-11 | 0.000104092 | 0.004231899 | 0.000165001 | 0.050100599  | -0.008282386 | RIPK1, RP1-40E16.12  |
| chr16 | 357654    | 358591    | 938  | * | 5  | 3.17662E-12 | 0.008689879 | 0.004235635 | 0.000522204 | 0.144929578  | 0.061244731  | AXIN1                |
| chr8  | 144432274 | 144432323 | 50   | * | 2  | 5.6481E-11  | 0.000175247 | 0.004239031 | 0.000351045 | -0.091561437 | -0.086749167 | TOP1MT               |
| chr22 | 44568203  | 44568812  | 610  | * | 9  | 7.91346E-30 | 6.90933E-10 | 0.004241731 | 9.59271E-09 | -0.282794128 | -0.123266649 | PARVB                |
| chr22 | 23933841  | 23933959  | 119  | * | 2  | 1.16006E-09 | 0.00051582  | 0.004242986 | 0.000842632 | -0.164898678 | -0.145823053 |                      |
| chr1  | 35660486  | 35660588  | 103  | * | 2  | 2.57615E-08 | 0.012678438 | 0.004247869 | 0.006592043 | -0.137101506 | -0.044547704 |                      |
| chr2  | 10429878  | 10430135  | 258  | * | 3  | 3.84504E-11 | 0.002410823 | 0.004247977 | 0.000511412 | 0.147885099  | 0.095208899  |                      |
| chr19 | 8579985   | 8580509   | 525  | * | 5  | 7.49014E-16 | 1.8521E-05  | 0.00425038  | 5.99672E-05 | -0.259682741 | -0.060674454 |                      |
| chr1  | 145045085 | 145045138 | 54   | * | 2  | 1.91875E-09 | 0.000429105 | 0.004254985 | 0.000730111 | 0.170438265  | 0.138319838  | PDE4DIP              |
| chr14 | 23623480  | 23624377  | 898  | * | 7  | 1.90943E-13 | 0.015125691 | 0.004255661 | 0.004844418 | 0.171549833  | 0.049829218  | SLC7A8               |
| chr20 | 61542163  | 61542613  | 451  | * | 5  | 2.16608E-08 | 0.155245148 | 0.004256804 | 0.025396875 | 0.038833993  | 0.013753941  | DIDO1                |

|       |           |           |      |   |    |             |             |             |             |              |              |                      |
|-------|-----------|-----------|------|---|----|-------------|-------------|-------------|-------------|--------------|--------------|----------------------|
| chr15 | 99256874  | 99257110  | 237  | * | 2  | 4.00582E-10 | 0.000139192 | 0.004257957 | 0.000289004 | -0.207879371 | -0.031759391 | IGF1R                |
| chr19 | 4968104   | 4968614   | 511  | * | 5  | 6.39641E-16 | 0.004210928 | 0.004268443 | 0.000343819 | -0.216940297 | -0.042362812 |                      |
| chr8  | 27466501  | 27466508  | 8    | * | 2  | 1.67416E-10 | 0.000115672 | 0.004269123 | 0.000246645 | 0.139107111  | 0.128802183  | CLU                  |
| chr16 | 89286751  | 89287425  | 675  | * | 4  | 5.46307E-14 | 0.000197701 | 0.004270059 | 0.000173149 | 0.185895478  | 0.103573003  | ZNF778               |
| chr19 | 567046    | 568176    | 1131 | * | 3  | 3.40532E-09 | 7.85633E-05 | 0.004272457 | 0.000135383 | -0.273625563 | -0.186599871 | AC009005.2           |
| chr19 | 55594963  | 55595022  | 60   | * | 2  | 8.95226E-10 | 0.000334929 | 0.004276269 | 0.000600004 | 0.128228943  | 0.1170629    | EPS8L1               |
| chr12 | 77156168  | 77158144  | 1977 | * | 14 | 2.2951E-20  | 0.027119654 | 0.004276549 | 0.001229441 | 0.147276985  | 0.022113545  | ZDHHC17              |
| chr7  | 100655589 | 100655601 | 13   | * | 2  | 5.64266E-11 | 0.000101634 | 0.00427833  | 0.000220567 | -0.152229546 | -0.148169905 | MUC12                |
| chr10 | 80516517  | 80516893  | 377  | * | 2  | 9.68694E-11 | 0.0001104   | 0.004284895 | 0.000237053 | -0.163629723 | -0.1435075   |                      |
| chr14 | 94491958  | 94493296  | 1339 | * | 13 | 2.62972E-22 | 0.001323735 | 0.004285061 | 0.000197844 | -0.330489463 | -0.033753535 | OTUB2                |
| chr8  | 142238452 | 142239055 | 604  | * | 8  | 4.51011E-14 | 0.160026452 | 0.004289687 | 0.008189868 | -0.259168381 | -0.053764412 | SLC45A4              |
| chr19 | 48759881  | 48760233  | 353  | * | 4  | 2.00084E-09 | 0.030343762 | 0.004295271 | 0.008224552 | -0.157928302 | -0.088095741 | ZNF114, CTC-241F20.3 |
| chr2  | 73519034  | 73519364  | 331  | * | 3  | 9.77875E-10 | 0.005560617 | 0.004297565 | 0.003847494 | 0.074301748  | 0.038686396  | EGR4                 |
| chr9  | 85881935  | 85881968  | 34   | * | 2  | 5.22859E-10 | 0.000256574 | 0.004299188 | 0.000483665 | 0.134005841  | 0.109318957  | FRMD3                |
| chr11 | 114100017 | 114100689 | 673  | * | 2  | 4.12255E-11 | 0.000101859 | 0.004300295 | 0.000221193 | -0.17310696  | -0.053958755 | ZBTB16, RP11-64D24.2 |
| chr6  | 33254385  | 33254927  | 543  | * | 9  | 6.90106E-21 | 0.001385527 | 0.004300338 | 0.000468545 | -0.328138734 | -0.074020879 | WDR46                |
| chr16 | 89831123  | 89831437  | 315  | * | 2  | 1.04629E-09 | 0.000233935 | 0.004311862 | 0.0004485   | -0.174951147 | -0.11518425  | FANCA                |
| chr16 | 23562225  | 23562343  | 119  | * | 3  | 1.24239E-07 | 0.009267156 | 0.004313512 | 0.006026512 | -0.031810558 | -0.02139531  | EARS2                |
| chr19 | 58629522  | 58630612  | 1091 | * | 11 | 5.68411E-26 | 0.000114938 | 0.004314429 | 3.0378E-05  | -0.258881505 | -0.018765433 | ZSCAN18              |
| chr19 | 51898727  | 51898904  | 178  | * | 2  | 5.47026E-10 | 0.000316423 | 0.004314605 | 0.000574419 | -0.244346564 | -0.164945995 | CTD-2616J11.14       |
| chr5  | 169784957 | 169785032 | 76   | * | 2  | 3.38258E-10 | 0.000121753 | 0.004317778 | 0.000258335 | -0.160201116 | -0.134131293 | KCNIP1               |
| chr2  | 64712535  | 64713105  | 571  | * | 3  | 9.87621E-12 | 0.008252655 | 0.004320083 | 0.005770848 | -0.215664189 | -0.065119821 |                      |
| chr16 | 68702501  | 68702627  | 127  | * | 2  | 5.32618E-08 | 0.001747648 | 0.004332781 | 0.002076199 | -0.12814591  | -0.07371034  | CDH3                 |
| chr1  | 204231300 | 204231408 | 109  | * | 2  | 1.12492E-10 | 0.000420856 | 0.004337484 | 0.000722903 | 0.109566053  | 0.09034472   | PLEKHA6              |
| chr20 | 34541013  | 34543081  | 2069 | * | 13 | 2.79574E-14 | 0.033647075 | 0.004341512 | 0.000697208 | -0.19188387  | -0.016112669 | SCAND1               |
| chr22 | 50173724  | 50174297  | 574  | * | 8  | 1.05437E-17 | 0.00024338  | 0.00434182  | 0.000133916 | -0.201855796 | -0.069253881 | BRD1                 |
| chr1  | 45097216  | 45097499  | 284  | * | 3  | 1.44128E-11 | 0.002050438 | 0.004348349 | 0.000983371 | 0.222274471  | 0.130329941  | RNF220               |
| chr17 | 3794211   | 3796782   | 2572 | * | 11 | 1.31463E-13 | 0.000794401 | 0.00434935  | 0.000196734 | 0.1714983    | 0.024809602  | CAMKK1               |
| chr7  | 101798913 | 101799218 | 306  | * | 3  | 1.9133E-11  | 0.003295835 | 0.004349554 | 0.000735536 | 0.133307014  | 0.091273628  | CUX1                 |

|       |           |           |      |   |    |             |             |             |             |              |              |                    |
|-------|-----------|-----------|------|---|----|-------------|-------------|-------------|-------------|--------------|--------------|--------------------|
| chr1  | 243958196 | 243958259 | 64   | * | 3  | 7.94972E-12 | 0.000111928 | 0.004350625 | 0.000169149 | 0.188654944  | 0.125629211  | AKT3               |
| chr20 | 52199520  | 52199778  | 259  | * | 5  | 3.98681E-19 | 3.27507E-07 | 0.004355348 | 1.98561E-06 | -0.244719606 | -0.166460425 | ZNF217             |
| chr9  | 123546098 | 123546374 | 277  | * | 2  | 2.75812E-10 | 0.000111145 | 0.00435625  | 0.000239153 | -0.167606231 | -0.124733649 | FBXW2              |
| chr10 | 64563185  | 64565772  | 2588 | * | 18 | 6.21607E-21 | 0.008428198 | 0.004358541 | 0.002088503 | -0.221052193 | 0.004086849  | ADO, RP11-436D10.3 |
| chr12 | 27395963  | 27397422  | 1460 | * | 14 | 3.82627E-29 | 0.000571041 | 0.004360527 | 2.58464E-05 | -0.322901853 | -0.08029044  | STK38L             |
| chr10 | 126213758 | 126213886 | 129  | * | 2  | 2.92856E-08 | 0.032345411 | 0.004361547 | 0.009935169 | 0.146643285  | 0.078780129  | LHPP               |
| chr11 | 45710875  | 45711290  | 416  | * | 4  | 1.45607E-11 | 0.01406373  | 0.004363699 | 0.002983448 | 0.192196503  | 0.072617661  |                    |
| chr1  | 228333578 | 228333668 | 91   | * | 2  | 2.26802E-09 | 0.001290046 | 0.004366367 | 0.001684608 | 0.145148633  | 0.095088382  | GUK1               |
| chr9  | 131902135 | 131902471 | 337  | * | 4  | 6.63459E-11 | 0.001283964 | 0.004366495 | 0.001156499 | -0.160141118 | -0.082818434 | PPP2R4             |
| chr19 | 3123192   | 3123291   | 100  | * | 2  | 3.51946E-10 | 0.000555837 | 0.004373734 | 0.000901131 | -0.164350978 | -0.01846032  | GNA11              |
| chr21 | 34100988  | 34101413  | 426  | * | 3  | 3.06247E-10 | 0.297128923 | 0.004374402 | 0.021613756 | -0.196030916 | -0.058058276 | PAXBP1-AS1         |
| chr1  | 27884179  | 27884618  | 440  | * | 3  | 1.1224E-08  | 0.003845269 | 0.004376718 | 0.003578659 | -0.132514299 | -0.010747053 | AHDC1              |
| chr17 | 73451648  | 73452755  | 1108 | * | 11 | 2.26193E-15 | 0.066500158 | 0.004382688 | 0.007330629 | -0.244961332 | -0.02430179  | KIAA0195           |
| chr17 | 4834179   | 4835041   | 863  | * | 4  | 2.70008E-13 | 0.003178221 | 0.004396622 | 0.001133851 | 0.205274153  | 0.085783539  |                    |
| chr11 | 5246823   | 5246944   | 122  | * | 2  | 3.04047E-11 | 0.000276777 | 0.0043979   | 0.000517563 | 0.137537604  | 0.124419606  | HBB                |
| chr6  | 47246556  | 47247047  | 492  | * | 2  | 5.90595E-10 | 0.000121947 | 0.00440707  | 0.000259681 | -0.237625512 | -0.232833979 | TNFRSF21           |
| chr11 | 118978103 | 118978508 | 406  | * | 4  | 5.46051E-11 | 0.082955045 | 0.004409533 | 0.024653583 | 0.021739798  | 0.000469566  | C2CD2L, DPAGT1     |
| chr14 | 105857176 | 105857250 | 75   | * | 3  | 8.42307E-09 | 0.021163886 | 0.004418217 | 0.005852256 | 0.136969183  | 0.072677374  | PACS2              |
| chr19 | 41035368  | 41035836  | 469  | * | 2  | 1.22479E-07 | 0.245077764 | 0.004418401 | 0.015332448 | 0.019178572  | 0.011421832  | SPTBN4             |
| chr2  | 242710665 | 242711046 | 382  | * | 5  | 1.64292E-09 | 0.047338431 | 0.00442446  | 0.014861818 | -0.19508264  | -0.058992715 |                    |
| chr5  | 138860810 | 138861241 | 432  | * | 3  | 1.49107E-12 | 0.000365285 | 0.004425511 | 0.000470879 | -0.106050759 | -0.066596543 | TMEM173            |
| chr2  | 27993847  | 27994018  | 172  | * | 2  | 1.531E-09   | 0.052134192 | 0.004426902 | 0.011720533 | -0.175554534 | -0.076062328 |                    |
| chr8  | 97157453  | 97157756  | 304  | * | 2  | 1.35657E-07 | 0.007322497 | 0.004432787 | 0.005096026 | 0.026461921  | 0.01655114   | GDF6               |
| chr2  | 175463829 | 175464253 | 425  | * | 2  | 5.02613E-09 | 0.009278152 | 0.004436587 | 0.005785064 | 0.113595793  | 0.071294915  | AC018890.6, WIPF1  |
| chr1  | 1710453   | 1712885   | 2433 | * | 15 | 2.05258E-31 | 6.17537E-08 | 0.004437865 | 2.61776E-08 | -0.227703049 | -0.079192366 | NADK               |
| chr6  | 10585683  | 10585889  | 207  | * | 3  | 1.92227E-09 | 0.002542888 | 0.00444805  | 0.002683162 | 0.228034477  | 0.098721323  | GCNT2              |
| chr7  | 151403110 | 151403164 | 55   | * | 2  | 1.81788E-10 | 0.000176937 | 0.004452344 | 0.000357617 | -0.207901792 | -0.15088861  | PRKAG2             |
| chr1  | 201251911 | 201252974 | 1064 | * | 12 | 9.96297E-24 | 0.001094276 | 0.004452548 | 0.000104387 | 0.074334015  | 0.024610984  | PKP1               |
| chr8  | 42009223  | 42009622  | 400  | * | 2  | 1.25334E-09 | 0.072316163 | 0.004454379 | 0.012842828 | -0.184378856 | -0.08724818  | RP11-589C21.5      |

|       |           |           |      |   |    |             |             |             |             |              |              |                               |
|-------|-----------|-----------|------|---|----|-------------|-------------|-------------|-------------|--------------|--------------|-------------------------------|
| chr5  | 173198447 | 173198932 | 486  | * | 4  | 3.11715E-13 | 0.002936292 | 0.004460739 | 0.000365626 | 0.146718222  | 0.086241133  |                               |
| chr7  | 129254604 | 129254787 | 184  | * | 2  | 1.10886E-08 | 0.000739191 | 0.004466801 | 0.001128298 | -0.173577048 | -0.143133109 | NRF1                          |
| chr14 | 72053158  | 72053361  | 204  | * | 3  | 2.99826E-08 | 0.0708767   | 0.004468039 | 0.014331165 | -0.158506412 | -0.082254767 | SIPA1L1                       |
| chr12 | 111801136 | 111801794 | 659  | * | 6  | 8.57485E-10 | 0.096761319 | 0.00446811  | 0.019832218 | -0.096866968 | -0.026244434 | FAM109A                       |
| chr8  | 102149430 | 102150072 | 643  | * | 7  | 5.44013E-16 | 0.021507585 | 0.004468943 | 0.00258322  | -0.154194714 | -0.048335571 |                               |
| chr12 | 57631687  | 57632706  | 1020 | * | 6  | 1.97861E-12 | 0.036380502 | 0.004470903 | 0.004407232 | 0.082920336  | 0.022086071  | NDUFA4L2                      |
| chr14 | 104570754 | 104571173 | 420  | * | 5  | 4.24952E-09 | 0.050826122 | 0.004472874 | 0.015694696 | 0.145580805  | 0.05675175   | ASPG                          |
| chr18 | 47815407  | 47815588  | 182  | * | 5  | 9.41322E-08 | 0.642105005 | 0.004474609 | 0.106675554 | -0.223797718 | -0.042149694 |                               |
| chr12 | 14413090  | 14413185  | 96   | * | 2  | 3.72721E-08 | 0.004036164 | 0.004479992 | 0.00362809  | -0.198336006 | -0.142814069 |                               |
| chr10 | 14614164  | 14614830  | 667  | * | 6  | 3.37737E-17 | 0.00386887  | 0.004485515 | 0.000131061 | -0.287017546 | -0.144782899 | FAM107B                       |
| chr1  | 161146978 | 161148880 | 1903 | * | 18 | 4.68354E-24 | 0.130146975 | 0.004488477 | 0.001662309 | 0.206060826  | 0.024740941  | PPOX, B4GALT3                 |
| chr10 | 129947756 | 129947858 | 103  | * | 3  | 1.22274E-07 | 0.106890636 | 0.004490059 | 0.013989774 | 0.123224328  | 0.05786012   |                               |
| chr16 | 68033509  | 68034002  | 494  | * | 3  | 1.36E-08    | 0.01440067  | 0.004491977 | 0.004185068 | -0.160235613 | -0.07228808  | DUS2, DPEP2                   |
| chr19 | 41882069  | 41882741  | 673  | * | 13 | 1.65999E-25 | 0.039244585 | 0.004493964 | 0.000115383 | -0.205219366 | -0.0442638   | CTC-435M10.3, TMEM91          |
| chr5  | 1474995   | 1475732   | 738  | * | 3  | 2.55164E-10 | 0.034274856 | 0.004498107 | 0.007714814 | -0.270751335 | -0.099034638 | LPCAT1                        |
| chr3  | 14185508  | 14186122  | 615  | * | 3  | 1.23982E-12 | 0.015946363 | 0.004504756 | 0.001638963 | -0.124489322 | -0.078127435 | RP11-434D12.1                 |
| chr11 | 133372412 | 133372672 | 261  | * | 3  | 1.01189E-07 | 0.066836491 | 0.004506364 | 0.007859064 | -0.12336576  | -0.020572122 | OPCML                         |
| chr19 | 839537    | 839689    | 153  | * | 3  | 4.21602E-18 | 4.92843E-06 | 0.004510543 | 2.04689E-05 | -0.193113233 | -0.176606442 |                               |
| chr15 | 48484282  | 48484469  | 188  | * | 4  | 2.11252E-08 | 0.061290169 | 0.004513396 | 0.010980682 | 0.111376639  | 0.053201835  | CTXN2, SLC12A1, RP11-605F22.1 |
| chr18 | 28743074  | 28743186  | 113  | * | 3  | 3.52425E-09 | 0.002067123 | 0.004514171 | 0.002126209 | 0.132589274  | 0.085585419  |                               |
| chr3  | 32474566  | 32474793  | 228  | * | 2  | 5.44047E-09 | 0.000488469 | 0.00451609  | 0.000822488 | -0.161775435 | -0.135518666 | CMTM7                         |
| chr17 | 65516746  | 65516777  | 32   | * | 2  | 4.07801E-08 | 0.004631183 | 0.004519511 | 0.003959552 | -0.09267668  | -0.056352289 | PITPNC1                       |
| chr6  | 159549155 | 159549723 | 569  | * | 4  | 8.20049E-17 | 9.03429E-06 | 0.004519741 | 1.89533E-05 | 0.19248011   | 0.118973745  |                               |
| chr8  | 30600962  | 30601401  | 440  | * | 4  | 1.6917E-11  | 0.075508444 | 0.004533084 | 0.024226428 | 0.104426798  | 0.023925649  | UBXN8                         |
| chr7  | 102065448 | 102065866 | 419  | * | 2  | 3.2778E-11  | 0.000113107 | 0.004536832 | 0.000244584 | -0.253063508 | -0.190411533 | PRKRIP1                       |
| chr17 | 46190702  | 46190705  | 4    | * | 2  | 8.07691E-10 | 0.00017235  | 0.004539617 | 0.000351173 | -0.271769494 | -0.253968835 | SNX11                         |
| chr10 | 75415704  | 75416206  | 503  | * | 6  | 2.09252E-15 | 0.001182081 | 0.004547278 | 0.000156733 | 0.120485277  | 0.057975779  | RP11-464F9.21, SYNPO2L        |
| chr4  | 68334016  | 68334446  | 431  | * | 3  | 4.58272E-12 | 0.000319972 | 0.004547809 | 0.00029208  | -0.234385727 | -0.03429129  |                               |
| chr2  | 105940276 | 105940459 | 184  | * | 2  | 3.68182E-08 | 0.002905277 | 0.004549701 | 0.002972914 | 0.144089514  | 0.05703283   | TGFBRAP1                      |



|       |           |           |      |   |    |             |             |             |             |              |              |                                 |
|-------|-----------|-----------|------|---|----|-------------|-------------|-------------|-------------|--------------|--------------|---------------------------------|
| chr11 | 67796808  | 67797936  | 1129 | * | 12 | 4.70893E-26 | 0.001658777 | 0.004555937 | 0.000184141 | -0.233429302 | -0.04512982  | RP5-901A4.1                     |
| chr9  | 84270635  | 84271042  | 408  | * | 2  | 1.74477E-09 | 0.000303027 | 0.004556008 | 0.000562272 | -0.187261077 | -0.141195747 | TLE1                            |
| chr11 | 66688584  | 66688628  | 45   | * | 2  | 1.20501E-10 | 0.000186459 | 0.004559152 | 0.000375684 | -0.115683445 | -0.081978589 | PC                              |
| chr5  | 131605459 | 131605617 | 159  | * | 2  | 1.204E-07   | 0.008079494 | 0.004560458 | 0.005459872 | 0.141226981  | 0.061139012  | PDLIM4, P4HA2                   |
| chr6  | 166756767 | 166756786 | 20   | * | 2  | 3.17208E-08 | 0.00730334  | 0.004563159 | 0.005169373 | -0.052627359 | -0.040120955 |                                 |
| chr17 | 73901394  | 73902746  | 1353 | * | 4  | 3.5796E-13  | 0.00040093  | 0.004563693 | 0.000177172 | -0.161123531 | -0.084997883 | MRPL38, RP11-552F3.12           |
| chr7  | 66119076  | 66119479  | 404  | * | 3  | 1.45637E-13 | 7.75167E-05 | 0.0045666   | 0.000198081 | 0.019898874  | 0.009660225  | KCTD7                           |
| chr19 | 46526100  | 46527546  | 1447 | * | 16 | 2.15486E-25 | 0.022552424 | 0.004576388 | 0.000807059 | -0.176709963 | -0.049126102 | PGLYRP1                         |
| chr1  | 110009509 | 110009770 | 262  | * | 2  | 2.95062E-08 | 0.161408402 | 0.004577655 | 0.015179934 | 0.03466487   | 0.016623508  | SYPL2                           |
| chr17 | 71361857  | 71361901  | 45   | * | 3  | 1.74216E-08 | 0.024423227 | 0.004578098 | 0.003949373 | 0.265972942  | 0.177235413  | SDK2                            |
| chr5  | 145966494 | 145966653 | 160  | * | 3  | 4.49177E-09 | 0.013626357 | 0.00458331  | 0.004276664 | -0.231973127 | -0.083958304 | CTB-99A3.1                      |
| chr4  | 159690352 | 159690372 | 21   | * | 2  | 6.87751E-08 | 0.063753206 | 0.004584486 | 0.012715971 | 0.011992741  | 0.007011809  | FNIP2                           |
| chr16 | 19191723  | 19191796  | 74   | * | 2  | 9.17334E-08 | 0.003029992 | 0.004585074 | 0.003065029 | 0.11259436   | 0.045987641  | SYT17                           |
| chr15 | 37387304  | 37388127  | 824  | * | 6  | 2.29841E-14 | 0.006935737 | 0.004585883 | 0.001276859 | 0.084553308  | 0.041068915  | MEIS2                           |
| chr11 | 64108241  | 64109823  | 1583 | * | 9  | 9.7713E-21  | 0.005282642 | 0.004588464 | 0.000796558 | -0.325986073 | -0.083392062 | CCDC88B                         |
| chr17 | 36665826  | 36666642  | 817  | * | 6  | 3.26144E-09 | 0.138775361 | 0.004594552 | 0.042925885 | -0.117960308 | -0.028824553 | ARHGAP23                        |
| chr18 | 46458754  | 46459473  | 720  | * | 2  | 6.22367E-09 | 0.000115067 | 0.00459817  | 0.000248856 | -0.160161605 | -5.78641E-05 | SMAD7                           |
| chr11 | 64097027  | 64097101  | 75   | * | 3  | 5.04371E-11 | 0.000340955 | 0.004598205 | 0.000658807 | 0.183001964  | 0.123808881  |                                 |
| chr1  | 154405251 | 154405736 | 486  | * | 2  | 1.3683E-09  | 0.000735241 | 0.004600674 | 0.001134524 | -0.13534207  | -0.104661151 | IL6R                            |
| chr7  | 23720549  | 23721400  | 852  | * | 4  | 7.63075E-14 | 0.01038716  | 0.0046029   | 0.002690906 | -0.26176757  | -0.053136194 | FAM221A                         |
| chr17 | 17722503  | 17723462  | 960  | * | 4  | 1.93722E-11 | 0.030360533 | 0.004603612 | 0.006742361 | -0.253762155 | -0.07308341  | SREBF1                          |
| chr2  | 71221537  | 71222556  | 1020 | * | 15 | 8.85734E-16 | 0.319995951 | 0.004614515 | 0.037930454 | -0.031927532 | 0.002311826  | AC007040.6, AC007040.11, TEX261 |
| chr19 | 2273706   | 2273779   | 74   | * | 2  | 4.41989E-08 | 0.053915542 | 0.00461717  | 0.012206592 | 0.029263009  | 0.005789984  |                                 |
| chr7  | 92047156  | 92047388  | 233  | * | 3  | 7.61577E-10 | 0.001579593 | 0.004622096 | 0.001188113 | 0.189189867  | 0.10087526   | TMBIM7P                         |
| chr22 | 40814878  | 40814966  | 89   | * | 2  | 1.38919E-07 | 0.157220641 | 0.004623006 | 0.015252692 | 0.089351018  | 0.048172867  | MKL1                            |
| chr1  | 14029478  | 14030141  | 664  | * | 5  | 3.89674E-15 | 0.00519235  | 0.004645418 | 0.00095499  | -0.292062686 | -0.116217458 | PRDM2                           |
| chr7  | 157198482 | 157198869 | 388  | * | 3  | 1.49525E-11 | 0.000508394 | 0.004648616 | 0.000812689 | 0.15370995   | 0.091649097  | DNAJB6                          |
| chr16 | 16169888  | 16170435  | 548  | * | 4  | 3.07749E-18 | 1.4504E-07  | 0.004655112 | 1.23548E-06 | -0.192298847 | -0.171959657 | ABCC1                           |
| chr2  | 207847270 | 207848321 | 1052 | * | 5  | 2.88055E-14 | 0.003316905 | 0.004663318 | 0.000808049 | -0.236353191 | -0.069074081 |                                 |

|       |           |           |      |   |    |             |             |             |             |              |              |                 |
|-------|-----------|-----------|------|---|----|-------------|-------------|-------------|-------------|--------------|--------------|-----------------|
| chr1  | 65363870  | 65363974  | 105  | * | 2  | 6.84547E-10 | 0.000166153 | 0.004663558 | 0.000342289 | 0.218142164  | 0.171950689  | JAK1            |
| chr17 | 73082678  | 73084329  | 1652 | * | 15 | 1.80402E-20 | 0.011758535 | 0.00466429  | 0.001712722 | 0.15639744   | 0.02690832   | SLC16A5         |
| chr17 | 79004850  | 79006166  | 1317 | * | 12 | 2.95571E-27 | 1.95482E-08 | 0.004670752 | 8.06067E-08 | -0.228568526 | -0.105091215 | BAIAP2-AS1      |
| chr10 | 93861385  | 93861824  | 440  | * | 2  | 5.95476E-10 | 0.000433324 | 0.004670836 | 0.000755253 | 0.162464459  | 0.159922666  | CPEB3           |
| chr16 | 51185407  | 51186266  | 860  | * | 7  | 6.7125E-14  | 0.361536347 | 0.00467212  | 0.015997262 | 0.03164568   | 0.003177539  |                 |
| chr1  | 44819838  | 44821812  | 1975 | * | 17 | 2.79683E-18 | 0.013517897 | 0.004674036 | 0.000831283 | -0.197039026 | -0.02399021  | ERI3            |
| chr10 | 52287323  | 52287340  | 18   | * | 2  | 3.75894E-09 | 0.000333478 | 0.00467739  | 0.000611934 | 0.118440637  | 0.105223977  | SGMS1           |
| chr5  | 619736    | 619994    | 259  | * | 3  | 7.78174E-08 | 0.042436504 | 0.004685463 | 0.008887509 | -0.213717322 | -0.091000621 | CEP72           |
| chr20 | 4070556   | 4071004   | 449  | * | 2  | 4.13502E-10 | 0.000147029 | 0.004686032 | 0.000308601 | -0.289810472 | -0.26327808  |                 |
| chr6  | 131520697 | 131521103 | 407  | * | 5  | 1.32816E-08 | 0.0481246   | 0.00468773  | 0.018482181 | 0.1589541    | 0.014098927  | AKAP7           |
| chr2  | 11490628  | 11490636  | 9    | * | 2  | 8.68313E-08 | 0.010793641 | 0.00468949  | 0.006454702 | 0.186266648  | 0.102322906  |                 |
| chr4  | 7301176   | 7301529   | 354  | * | 2  | 6.26299E-09 | 0.002224693 | 0.004689844 | 0.002527244 | 0.145753663  | 0.126706572  | SORCS2          |
| chr12 | 4676482   | 4676791   | 310  | * | 3  | 7.36369E-09 | 0.00699175  | 0.004695685 | 0.004089041 | -0.191027711 | -0.002085263 | DYRK4           |
| chr12 | 56638534  | 56638705  | 172  | * | 3  | 4.49068E-08 | 0.101706045 | 0.004700087 | 0.018120186 | 0.11641553   | 0.047079898  | ANKRD52         |
| chr7  | 30196739  | 30197130  | 392  | * | 6  | 2.86066E-14 | 0.00068755  | 0.004700257 | 0.000308376 | 0.167643973  | 0.071232676  | MTURN           |
| chr3  | 62364315  | 62365402  | 1088 | * | 9  | 1.16314E-12 | 0.019978001 | 0.004702478 | 0.013598217 | 0.064460998  | 0.028444391  |                 |
| chr12 | 49971316  | 49972129  | 814  | * | 4  | 1.26887E-09 | 0.011946927 | 0.004702889 | 0.004752431 | 0.194140385  | 0.066852134  | PRPF40B         |
| chr7  | 4762742   | 4763655   | 914  | * | 5  | 4.74291E-12 | 0.048566478 | 0.004707926 | 0.008347476 | 0.155177613  | 0.060366742  | FOXK1           |
| chr1  | 59509582  | 59509687  | 106  | * | 2  | 2.44936E-10 | 0.000177265 | 0.004714363 | 0.000362461 | -0.182577574 | -0.148055666 | RP4-794H19.4    |
| chr11 | 7534028   | 7534677   | 650  | * | 4  | 2.30592E-12 | 0.000666463 | 0.004718211 | 0.000996562 | -0.067745454 | 0.0011208    | PPFIBP2         |
| chr16 | 66555859  | 66556133  | 275  | * | 2  | 3.33593E-10 | 0.000123693 | 0.004722181 | 0.000266233 | -0.133959365 | -0.12604763  | TK2             |
| chr1  | 156123979 | 156124654 | 676  | * | 4  | 3.73158E-15 | 3.25811E-05 | 0.004725396 | 6.93295E-05 | -0.23174876  | -0.114933891 | SEMA4A          |
| chr1  | 1196457   | 1198269   | 1813 | * | 8  | 1.63497E-11 | 0.011170191 | 0.004739757 | 0.000271505 | -0.136782646 | 0.016471318  | UBE2J2          |
| chr22 | 26137524  | 26138429  | 906  | * | 11 | 4.86519E-30 | 1.61956E-05 | 0.004745752 | 4.19492E-07 | 0.182039883  | 0.085225609  | MYO18B          |
| chr17 | 43368729  | 43368748  | 20   | * | 2  | 2.17666E-08 | 0.001064532 | 0.004748917 | 0.001511782 | -0.169471063 | -0.121291181 | MAP3K14         |
| chr11 | 64338639  | 64339197  | 559  | * | 3  | 5.17481E-11 | 0.000377741 | 0.004750741 | 0.000555867 | -0.177409434 | -0.082308732 | SLC22A11        |
| chr9  | 137692717 | 137693277 | 561  | * | 3  | 2.20033E-09 | 0.004957314 | 0.004753005 | 0.002767832 | 0.158341844  | 0.077803851  | COL5A1          |
| chr1  | 43231631  | 43232666  | 1036 | * | 4  | 4.29029E-17 | 4.29173E-05 | 0.004754685 | 9.32551E-05 | 0.027488959  | 0.013110292  | LEPRE1          |
| chr7  | 102576079 | 102576477 | 399  | * | 4  | 3.68375E-10 | 0.002321364 | 0.00476227  | 0.00134764  | -0.155091367 | -0.064913691 | LRRIC17, FBXL13 |

|       |           |           |      |   |    |             |             |             |             |              |              |                     |
|-------|-----------|-----------|------|---|----|-------------|-------------|-------------|-------------|--------------|--------------|---------------------|
| chr19 | 19738054  | 19738592  | 539  | * | 2  | 3.89402E-08 | 0.002543033 | 0.004762352 | 0.002780981 | 0.111459568  | 0.027346432  | LPAR2               |
| chr5  | 131808798 | 131808970 | 173  | * | 3  | 4.27051E-08 | 0.007846736 | 0.004765946 | 0.005874163 | 0.161092463  | 0.096225131  | C5orf56             |
| chr1  | 52831953  | 52832660  | 708  | * | 9  | 4.00576E-10 | 0.385265967 | 0.004780277 | 0.079847395 | -0.04876555  | 0.000745755  |                     |
| chr13 | 46948804  | 46949210  | 407  | * | 3  | 5.67676E-12 | 0.000352831 | 0.004782427 | 0.000442595 | -0.294490485 | -0.170957931 | KIAA0226L, PPP1R2P4 |
| chr19 | 12890029  | 12890523  | 495  | * | 2  | 2.556E-09   | 0.000693017 | 0.004785114 | 0.001098071 | -0.168533146 | -0.130480483 | HOOK2               |
| chr14 | 22886075  | 22886796  | 722  | * | 3  | 5.04989E-10 | 0.001196536 | 0.004786825 | 0.000514131 | -0.118376885 | -0.017817946 | AE000661.37         |
| chr4  | 54458246  | 54459009  | 764  | * | 5  | 4.01613E-12 | 0.090517429 | 0.004786988 | 0.010232738 | -0.142468129 | -0.062911043 | FIP1L1, LNX1        |
| chr5  | 71146767  | 71146779  | 13   | * | 2  | 1.7985E-07  | 0.003039539 | 0.004788054 | 0.003131925 | 0.114887494  | 0.032671504  |                     |
| chr3  | 147077127 | 147077774 | 648  | * | 7  | 7.21992E-11 | 0.018415529 | 0.004788997 | 0.005940299 | 0.064065741  | 0.022160821  | RP11-649A16.1       |
| chr9  | 130859347 | 130860839 | 1493 | * | 12 | 1.63413E-26 | 3.4296E-06  | 0.004801828 | 1.69684E-07 | -0.196135152 | -0.032952579 | SLC25A25            |
| chr2  | 20601663  | 20601928  | 266  | * | 2  | 1.19057E-08 | 0.002646633 | 0.004804741 | 0.002866214 | -0.142165874 | -0.098783553 |                     |
| chr7  | 105088656 | 105088822 | 167  | * | 2  | 3.74522E-08 | 0.001255517 | 0.004807343 | 0.001712334 | -0.238381111 | -0.150795627 | PUS7                |
| chr8  | 134706823 | 134706976 | 154  | * | 2  | 2.64474E-09 | 0.000291326 | 0.004810536 | 0.00055169  | -0.099660513 | -0.067358847 |                     |
| chr8  | 134162674 | 134163056 | 383  | * | 3  | 3.72361E-11 | 0.000160695 | 0.00481291  | 0.000229005 | -0.239191465 | -0.168547145 |                     |
| chr1  | 25198759  | 25199304  | 546  | * | 2  | 9.63256E-10 | 0.000126561 | 0.004819597 | 0.000272577 | -0.111342687 | -0.095409603 |                     |
| chr4  | 125504    | 126058    | 555  | * | 2  | 7.72139E-09 | 0.005535052 | 0.004826177 | 0.004547751 | 0.15641053   | 0.130119964  | ZNF718              |
| chr12 | 124941307 | 124942176 | 870  | * | 8  | 9.00003E-26 | 1.53904E-06 | 0.004833542 | 7.01142E-07 | 0.151848819  | 0.04477185   | NCOR2               |
| chr15 | 83477608  | 83478411  | 804  | * | 11 | 3.02715E-24 | 0.00027018  | 0.004833909 | 6.23301E-05 | 0.197751193  | 0.037146449  | WHAMM               |
| chr7  | 2903855   | 2904037   | 183  | * | 2  | 6.50724E-10 | 0.000667449 | 0.004836379 | 0.001070331 | -0.209507312 | -0.167244885 |                     |
| chr14 | 64194118  | 64194567  | 450  | * | 3  | 1.74752E-11 | 0.001713572 | 0.004840383 | 0.002005419 | 0.028399873  | 0.020708559  | SGPP1               |
| chr3  | 48936775  | 48936979  | 205  | * | 2  | 2.4485E-09  | 0.001042009 | 0.004854329 | 0.001499626 | 0.130797995  | 0.090743238  |                     |
| chr6  | 100039303 | 100039476 | 174  | * | 3  | 3.85516E-08 | 0.062284306 | 0.004854819 | 0.007532011 | -0.036047229 | -0.001207018 |                     |
| chr1  | 110155535 | 110156682 | 1148 | * | 6  | 1.27712E-13 | 0.000761238 | 0.00485977  | 0.000279624 | 0.153357719  | 0.080303978  | GNAT2               |
| chr1  | 1363280   | 1363291   | 12   | * | 2  | 9.64939E-09 | 0.004517057 | 0.004861016 | 0.004042738 | 0.025079612  | 0.02025357   |                     |
| chr19 | 55416788  | 55417647  | 860  | * | 7  | 1.33047E-15 | 0.018630286 | 0.004861755 | 0.000476832 | 0.235084237  | 0.102399365  | NCR1                |
| chr15 | 39877764  | 39877954  | 191  | * | 2  | 4.92537E-10 | 0.000138399 | 0.004862307 | 0.000294986 | 0.160329667  | 0.150289245  | THBS1               |
| chr1  | 203737534 | 203738799 | 1266 | * | 8  | 4.96973E-16 | 4.24127E-05 | 0.004869067 | 2.48914E-05 | -0.193021745 | -0.055422346 | LAX1                |
| chr14 | 88490135  | 88490333  | 199  | * | 2  | 3.65502E-08 | 0.01280831  | 0.004884179 | 0.007200129 | 0.201500253  | 0.114336138  | RP11-300J18.1       |
| chr11 | 62572592  | 62574403  | 1812 | * | 17 | 3.14118E-31 | 3.54598E-06 | 0.00489015  | 2.57993E-07 | -0.309224928 | -0.025075047 | NXF1, STX5          |

|       |           |           |      |   |    |             |             |             |             |              |              |                     |
|-------|-----------|-----------|------|---|----|-------------|-------------|-------------|-------------|--------------|--------------|---------------------|
| chr5  | 10626811  | 10626937  | 127  | * | 2  | 3.79273E-09 | 0.000335639 | 0.004890512 | 0.000622095 | -0.296185747 | -0.223596324 | ANKRD33B            |
| chr9  | 138951648 | 138952311 | 664  | * | 3  | 1.14699E-11 | 7.11923E-05 | 0.004891716 | 0.000196954 | -0.192468865 | -0.11620978  | NACC2               |
| chr1  | 221055097 | 221055964 | 868  | * | 7  | 2.24854E-15 | 0.087512483 | 0.004893769 | 0.004356239 | -0.213824283 | -0.04710486  | HLX                 |
| chr5  | 39203007  | 39203057  | 51   | * | 2  | 1.40953E-09 | 0.0003847   | 0.00489407  | 0.000695107 | -0.261478113 | -0.229329663 | FYB                 |
| chr1  | 3129958   | 3130550   | 593  | * | 5  | 1.44426E-14 | 0.011200026 | 0.004896454 | 0.001800136 | 0.172459703  | 0.060645966  | PRDM16              |
| chr12 | 48287192  | 48287729  | 538  | * | 3  | 6.88979E-12 | 0.000354091 | 0.004902135 | 0.00035465  | 0.161691467  | 0.086043223  | RP11-89H19.1, VDR   |
| chr18 | 77218378  | 77219240  | 863  | * | 5  | 5.22736E-16 | 0.000326426 | 0.004904649 | 8.52139E-05 | 0.214820017  | 0.120172502  | NFATC1              |
| chr3  | 18933367  | 18933400  | 34   | * | 2  | 3.14323E-09 | 0.000293483 | 0.004907862 | 0.000557719 | -0.109153102 | -0.077294996 | AC144521.1          |
| chr8  | 143319094 | 143319259 | 166  | * | 2  | 7.22643E-08 | 0.333736883 | 0.004911739 | 0.017047142 | -0.06943846  | -0.034748993 | TSNARE1             |
| chr21 | 44061403  | 44061597  | 195  | * | 2  | 7.61877E-08 | 0.007510991 | 0.00491179  | 0.005462486 | 0.167134828  | 0.105669261  |                     |
| chr4  | 18022372  | 18022498  | 127  | * | 3  | 9.75107E-09 | 0.405950475 | 0.004913002 | 0.022148751 | 0.019568171  | 0.009188165  | LCORL               |
| chr22 | 46403218  | 46403316  | 99   | * | 2  | 5.47905E-10 | 0.001716158 | 0.004913318 | 0.002155917 | -0.144980756 | -0.094041586 |                     |
| chr8  | 129162178 | 129162406 | 229  | * | 2  | 5.52749E-09 | 0.001383028 | 0.004915094 | 0.001850805 | -0.12221061  | -0.012083279 | MIR1208             |
| chr22 | 47169227  | 47169976  | 750  | * | 10 | 4.68497E-12 | 0.142205434 | 0.004918256 | 0.023378778 | -0.216104495 | -0.056805815 | TBC1D22A            |
| chr6  | 41747367  | 41748543  | 1177 | * | 10 | 3.34427E-23 | 0.008915555 | 0.004921028 | 6.21565E-05 | -0.094698509 | -0.024633994 | PRICKLE4, FRS3      |
| chr11 | 36422377  | 36422615  | 239  | * | 5  | 4.29817E-21 | 1.26721E-07 | 0.004931424 | 9.63495E-07 | -0.27172554  | -0.161353298 | PRR5L               |
| chr5  | 40797688  | 40798723  | 1036 | * | 14 | 3.38353E-12 | 0.626402853 | 0.00493353  | 0.15421216  | -0.041827272 | -0.006152181 | PRKAA1              |
| chr17 | 18149890  | 18150954  | 1065 | * | 5  | 1.04275E-14 | 0.005113615 | 0.004937518 | 0.003271161 | 0.125098963  | 0.064387438  | FLII                |
| chr5  | 150050273 | 150051052 | 780  | * | 3  | 6.38911E-12 | 3.86035E-05 | 0.004938004 | 0.000101851 | 0.084604673  | 0.036356811  | MYOZ3, CTC-345K18.2 |
| chr2  | 240422121 | 240423096 | 976  | * | 4  | 1.46581E-14 | 2.49535E-06 | 0.004946168 | 1.1688E-05  | -0.223406148 | -0.171032004 |                     |
| chr1  | 11900652  | 11903897  | 3246 | * | 10 | 4.97057E-17 | 4.91501E-07 | 0.004946801 | 1.52882E-07 | -0.318025869 | -0.041324144 | CLCN6, NPPA-AS1     |
| chr15 | 91382476  | 91382972  | 497  | * | 5  | 1.30261E-14 | 0.000833973 | 0.004952361 | 0.000182032 | -0.127464746 | -0.061224678 | CTD-3094K11.1       |
| chr19 | 24097411  | 24097753  | 343  | * | 3  | 1.20304E-12 | 0.000251176 | 0.004956854 | 0.000402934 | 0.100302254  | 0.076147405  | ZNF726              |
| chr6  | 31544694  | 31545473  | 780  | * | 7  | 1.85847E-23 | 0.000279493 | 0.004961604 | 2.51725E-05 | 0.20661561   | 0.105159828  | TNF                 |
| chr6  | 45447935  | 45448233  | 299  | * | 2  | 9.49611E-09 | 0.000658313 | 0.004965024 | 0.001067538 | -0.129890879 | -0.089071078 | RUNX2               |
| chr5  | 153872690 | 153873149 | 460  | * | 3  | 6.18043E-10 | 0.001354872 | 0.004969798 | 0.001717848 | 0.214431678  | 0.090960833  | CTB-158E9.2         |
| chr16 | 57077322  | 57077666  | 345  | * | 2  | 1.14526E-08 | 0.000815626 | 0.004970258 | 0.001258392 | -0.164899243 | -0.09316826  | NLRC5               |
| chr11 | 64645556  | 64647924  | 2369 | * | 21 | 5.95297E-22 | 0.000660032 | 0.004971681 | 4.6302E-05  | 0.194863175  | -0.009435995 | EHD1                |
| chr1  | 234781700 | 234781920 | 221  | * | 3  | 9.93468E-10 | 0.00555909  | 0.004975687 | 0.001671618 | -0.28823396  | -0.152756134 | RP4-781K5.9         |

|       |           |           |      |   |    |             |             |             |             |              |              |                                          |
|-------|-----------|-----------|------|---|----|-------------|-------------|-------------|-------------|--------------|--------------|------------------------------------------|
| chr15 | 67439378  | 67441067  | 1690 | * | 8  | 9.60201E-14 | 2.15385E-05 | 0.004981883 | 1.41281E-05 | -0.195815555 | -0.075296206 | SMAD3                                    |
| chr3  | 124775999 | 124776038 | 40   | * | 2  | 1.1041E-10  | 0.000238698 | 0.004987833 | 0.000471476 | -0.088266242 | -0.088233891 |                                          |
| chr19 | 8008274   | 8009199   | 926  | * | 12 | 3.1826E-15  | 0.002907138 | 0.004992844 | 0.002865367 | -0.054090418 | -0.009753469 | TIMM44                                   |
| chr19 | 2620967   | 2621851   | 885  | * | 2  | 5.75373E-09 | 0.000333733 | 0.004997155 | 0.000622528 | -0.131720794 | -0.08021007  | GNG7                                     |
| chr11 | 63752561  | 63754305  | 1745 | * | 17 | 5.44917E-18 | 0.019683743 | 0.004997379 | 0.002222278 | -0.296926555 | -0.018746956 | AP000721.4, OTUB1                        |
| chr12 | 54779077  | 54780377  | 1301 | * | 7  | 1.04966E-12 | 0.000276564 | 0.005000393 | 0.000198343 | 0.153343948  | 0.012800178  | RP11-753H16.3, RP11-753H16.5,<br>ZNF385A |
| chr13 | 28953821  | 28953831  | 11   | * | 2  | 7.49983E-10 | 0.000153194 | 0.00500274  | 0.000323699 | 0.140629173  | 0.131205453  | FLT1                                     |
| chr11 | 94373920  | 94374424  | 505  | * | 3  | 2.46655E-11 | 0.000786058 | 0.005004023 | 0.000595696 | -0.147371934 | -0.080347881 | RP11-867G2.5, RP11-867G2.8               |
| chr10 | 98415822  | 98416848  | 1027 | * | 5  | 1.25604E-15 | 1.04589E-06 | 0.00500649  | 7.36474E-06 | -0.244598889 | -0.124490074 | PIK3AP1                                  |
| chr2  | 11514876  | 11515248  | 373  | * | 4  | 9.91177E-14 | 0.000122304 | 0.005008156 | 7.77152E-05 | 0.146456599  | 0.105621588  |                                          |
| chr11 | 48041783  | 48042101  | 319  | * | 2  | 1.28801E-10 | 0.000207761 | 0.005013081 | 0.000419962 | -0.2662338   | -0.175944186 | PTPRJ                                    |
| chr20 | 25025765  | 25026187  | 423  | * | 2  | 2.42043E-10 | 0.000146791 | 0.005020511 | 0.000312211 | -0.191789939 | -0.035322087 | ACSS1                                    |
| chr2  | 11605539  | 11606277  | 739  | * | 5  | 7.48557E-16 | 0.01628348  | 0.005026443 | 0.002403531 | -0.050077074 | -0.018588954 | AC099344.1, E2F6                         |
| chr6  | 35228319  | 35228552  | 234  | * | 2  | 7.85266E-08 | 0.044536519 | 0.005031566 | 0.012250218 | -0.151926808 | -0.093977308 | ZNF76                                    |
| chr19 | 45943663  | 45943865  | 203  | * | 2  | 8.68262E-09 | 0.006151163 | 0.005032224 | 0.004940413 | 0.153742364  | 0.104151728  | ERCC1                                    |
| chr17 | 25571675  | 25572026  | 352  | * | 2  | 2.03986E-11 | 0.000137696 | 0.005033032 | 0.000295546 | -0.219620526 | -0.203641724 |                                          |
| chr1  | 44443270  | 44444305  | 1036 | * | 6  | 2.90758E-15 | 0.022023242 | 0.005033212 | 0.003088662 | -0.213135681 | -0.071642449 | ATP6V0B                                  |
| chr13 | 111819380 | 111820230 | 851  | * | 3  | 2.27492E-12 | 4.34983E-06 | 0.005034324 | 1.8984E-05  | 0.124996523  | 0.117755994  | ARHGEF7                                  |
| chr18 | 11179065  | 11179360  | 296  | * | 2  | 8.66472E-10 | 0.000168332 | 0.005042524 | 0.000351514 | -0.174617573 | -0.112282831 |                                          |
| chr5  | 176942521 | 176942953 | 433  | * | 3  | 1.59209E-11 | 0.007905903 | 0.005044534 | 0.003721943 | 0.131193074  | 0.060834271  | DDX41                                    |
| chr4  | 141348167 | 141349725 | 1559 | * | 18 | 8.86051E-25 | 0.002079691 | 0.005050039 | 0.000278277 | -0.191068639 | -0.031385195 | CLGN                                     |
| chr16 | 4582488   | 4582555   | 68   | * | 2  | 5.89378E-09 | 0.000390785 | 0.00505462  | 0.000709899 | 0.147159651  | 0.142947687  | CDIP1                                    |
| chr1  | 6530205   | 6531727   | 1523 | * | 7  | 2.56114E-15 | 0.053099676 | 0.005059006 | 0.000817271 | -0.101561003 | -0.038045396 | PLEKHG5                                  |
| chr2  | 217639206 | 217639532 | 327  | * | 2  | 7.1981E-10  | 0.000142039 | 0.005067158 | 0.000303973 | 0.145357007  | 0.127246794  | AC007563.5                               |
| chr9  | 135861399 | 135861738 | 340  | * | 3  | 8.80761E-10 | 0.001311416 | 0.005079348 | 0.001307612 | 0.148627805  | 0.106783827  | GF11B                                    |
| chr1  | 27952048  | 27953763  | 1716 | * | 8  | 2.43707E-20 | 0.000666813 | 0.005080673 | 2.45579E-05 | -0.316717119 | -0.100586    | FGR                                      |
| chr7  | 5271480   | 5272846   | 1367 | * | 8  | 3.02802E-19 | 8.67117E-05 | 0.005089016 | 5.09803E-05 | 0.143695288  | 0.077529022  | WIPI2                                    |
| chr1  | 45814217  | 45814632  | 416  | * | 2  | 4.80931E-09 | 0.000473212 | 0.005089509 | 0.000829465 | 0.219897706  | 0.13725573   | TESK2                                    |
| chr7  | 134836211 | 134836467 | 257  | * | 2  | 4.7119E-08  | 0.005780766 | 0.005095032 | 0.004795078 | -0.112538389 | -0.081276638 | TMEM140, C7orf49                         |

|       |           |           |      |   |    |             |             |             |             |              |              |                        |
|-------|-----------|-----------|------|---|----|-------------|-------------|-------------|-------------|--------------|--------------|------------------------|
| chr22 | 45071340  | 45071884  | 545  | * | 3  | 4.38399E-14 | 0.000445711 | 0.005095247 | 0.000768671 | 0.147611568  | 0.121601711  | PRR5                   |
| chr11 | 6258935   | 6259853   | 919  | * | 5  | 1.6656E-12  | 0.001425505 | 0.00509644  | 0.000902053 | 0.219753803  | 0.067059971  | CNGA4                  |
| chr8  | 141360555 | 141361266 | 712  | * | 5  | 1.18205E-15 | 0.001061685 | 0.0051045   | 0.000130582 | -0.292938758 | -0.127599996 | TRAPPC9                |
| chr11 | 5841482   | 5841688   | 207  | * | 3  | 1.1534E-10  | 0.001051508 | 0.00510531  | 0.000675665 | 0.184568922  | 0.119386816  | OR52N2, TRIM5          |
| chr1  | 155991941 | 155992141 | 201  | * | 2  | 1.3827E-08  | 0.013223995 | 0.005105398 | 0.007507896 | -0.183091996 | -0.101489579 |                        |
| chr5  | 76256017  | 76256334  | 318  | * | 2  | 9.50245E-10 | 0.000203756 | 0.005108526 | 0.000414725 | 0.132034349  | 0.118421212  | CRHBP                  |
| chr16 | 70472477  | 70473006  | 530  | * | 5  | 1.59642E-10 | 0.445736056 | 0.005112786 | 0.039980182 | -0.068293133 | -0.019891654 | ST3GAL2                |
| chr5  | 207590    | 208042    | 453  | * | 2  | 8.9774E-09  | 0.000978786 | 0.00511401  | 0.001457199 | 0.206639446  | 0.131321894  | CCDC127                |
| chr10 | 114437411 | 114438072 | 662  | * | 5  | 1.02565E-11 | 0.02522634  | 0.005133344 | 0.002416825 | 0.139628035  | 0.04770912   | VTI1A, RP11-25C19.3    |
| chr10 | 44274107  | 44274960  | 854  | * | 6  | 1.56375E-14 | 0.004289565 | 0.005137521 | 0.00137294  | 0.157080922  | 0.049412749  | RP11-272J7.4           |
| chr1  | 19000539  | 19000726  | 188  | * | 2  | 1.14368E-09 | 0.000185987 | 0.005141195 | 0.000384261 | 0.213233194  | 0.170494038  | PAX7                   |
| chr7  | 148843026 | 148844604 | 1579 | * | 10 | 5.05475E-12 | 0.003183558 | 0.005141532 | 0.001154206 | -0.302550153 | -0.018379856 | ZNF398                 |
| chr7  | 942748    | 942874    | 127  | * | 3  | 6.73254E-08 | 0.01570693  | 0.005147039 | 0.007726034 | 0.15603637   | 0.072027159  | ADAP1, COX19           |
| chr10 | 121095770 | 121096263 | 494  | * | 3  | 4.10116E-11 | 0.002721349 | 0.005149717 | 0.002106029 | 0.121787305  | 0.074397435  | GRK5                   |
| chr1  | 32264286  | 32264703  | 418  | * | 7  | 3.89186E-11 | 0.05017047  | 0.005150797 | 0.008540786 | 0.160086272  | 0.067315994  | SPOCD1                 |
| chr1  | 16483255  | 16483658  | 404  | * | 3  | 8.51733E-13 | 0.040414219 | 0.005154746 | 0.002222541 | -0.170689698 | -0.085801174 | RP11-276H7.2           |
| chr12 | 24374824  | 24375526  | 703  | * | 3  | 3.72135E-11 | 2.70198E-05 | 0.005157434 | 7.89589E-05 | -0.157489655 | -0.066549559 | RP11-444D3.1           |
| chr17 | 7742126   | 7743032   | 907  | * | 6  | 1.19599E-13 | 0.001563027 | 0.005158883 | 0.001753038 | -0.159292236 | -0.088636705 |                        |
| chr6  | 33256950  | 33258581  | 1632 | * | 32 | 1.5607E-17  | 0.291317654 | 0.00516299  | 0.175561372 | -0.2119266   | -0.015772627 | PFDN6, WDR46           |
| chr1  | 24144067  | 24144422  | 356  | * | 2  | 2.73364E-08 | 0.003695114 | 0.005167853 | 0.003673883 | 0.183708747  | 0.109459804  | HMGCL                  |
| chr22 | 36752926  | 36754002  | 1077 | * | 4  | 1.2191E-11  | 0.001358377 | 0.005169749 | 0.00012912  | 0.134860739  | 0.089591982  | MYH9                   |
| chr7  | 157089894 | 157090728 | 835  | * | 6  | 4.02107E-17 | 0.038867608 | 0.005176717 | 0.000849291 | -0.21953467  | -0.040657058 |                        |
| chr1  | 6520772   | 6520777   | 6    | * | 2  | 4.53458E-09 | 0.000427002 | 0.005183127 | 0.000767586 | 0.055323195  | 0.050027074  | ESPN                   |
| chr21 | 30554251  | 30554264  | 14   | * | 2  | 1.82573E-10 | 0.000180843 | 0.005185823 | 0.00037581  | 0.164008991  | 0.130383012  |                        |
| chr1  | 2230601   | 2230923   | 323  | * | 5  | 1.84941E-11 | 0.001251377 | 0.005187677 | 0.001223884 | 0.167286742  | 0.101113274  | SKI                    |
| chr1  | 11797908  | 11798278  | 371  | * | 2  | 7.15081E-09 | 0.000691373 | 0.005191495 | 0.001123901 | -0.167840384 | -0.127615978 | AGTRAP                 |
| chr10 | 85954622  | 85954958  | 337  | * | 2  | 2.55868E-08 | 0.002641753 | 0.005199268 | 0.002961837 | 0.05905488   | 0.05309514   | CDHR1                  |
| chr6  | 88106888  | 88106922  | 35   | * | 2  | 2.65155E-08 | 0.000817483 | 0.005200805 | 0.001278992 | -0.117272037 | -0.087117899 | RP1-102H19.8, C6orf164 |
| chr22 | 37641093  | 37641970  | 878  | * | 4  | 1.76923E-15 | 6.25538E-06 | 0.00520099  | 1.77849E-05 | -0.126808824 | -0.086435721 |                        |

|       |           |           |      |   |    |             |             |             |             |              |              |                              |
|-------|-----------|-----------|------|---|----|-------------|-------------|-------------|-------------|--------------|--------------|------------------------------|
| chr3  | 124504020 | 124504100 | 81   | * | 2  | 8.17815E-10 | 0.00015399  | 0.005204422 | 0.000327559 | 0.180359638  | 0.158696411  | ITGB5-AS1, ITGB5             |
| chr1  | 16693215  | 16694269  | 1055 | * | 14 | 1.50193E-20 | 0.007222329 | 0.005208356 | 0.000269383 | 0.075966502  | -0.004316609 | SZRD1                        |
| chr1  | 205601084 | 205601417 | 334  | * | 5  | 2.1147E-08  | 0.209427836 | 0.005210554 | 0.030485265 | -0.025800592 | -0.000940466 | ELK4                         |
| chr3  | 45928007  | 45928018  | 12   | * | 2  | 6.24691E-10 | 0.00017162  | 0.005226596 | 0.000359878 | 0.138495222  | 0.115359027  | CCR9, LZTFL1                 |
| chr7  | 123388340 | 123389622 | 1283 | * | 12 | 1.07795E-18 | 0.001858186 | 0.005228555 | 0.000355534 | 0.029334278  | 0.00541456   | RP11-390E23.6, WASL          |
| chr12 | 54555643  | 54555649  | 7    | * | 2  | 4.2376E-11  | 0.000151845 | 0.005237524 | 0.000323992 | 0.160249768  | 0.145809438  |                              |
| chr16 | 30042330  | 30042541  | 212  | * | 4  | 6.3358E-09  | 0.042138113 | 0.005242766 | 0.01583111  | 0.033552417  | 0.014673839  | FAM57B                       |
| chr11 | 66886118  | 66886765  | 648  | * | 5  | 8.99069E-13 | 0.001083523 | 0.005258006 | 0.000557127 | -0.069331536 | -0.024840166 | KDM2A                        |
| chr12 | 1756074   | 1756191   | 118  | * | 2  | 3.56348E-10 | 0.000616302 | 0.005261571 | 0.001031787 | -0.162931279 | -0.136400339 | WNT5B                        |
| chr3  | 46446998  | 46447254  | 257  | * | 2  | 1.86668E-08 | 0.217386418 | 0.005263431 | 0.017584129 | -0.142749443 | -0.073094779 | RP11-24F11.2                 |
| chr9  | 107666012 | 107666037 | 26   | * | 2  | 1.64434E-08 | 0.00062001  | 0.005266392 | 0.001036921 | 0.136027147  | 0.102653042  | ABCA1                        |
| chr2  | 114359188 | 114359736 | 549  | * | 3  | 1.5304E-10  | 0.001018854 | 0.005272733 | 0.00097114  | 0.112690625  | 0.104492096  |                              |
| chr19 | 30573088  | 30573118  | 31   | * | 2  | 2.24579E-10 | 0.000150304 | 0.005277647 | 0.000321595 | -0.191814508 | -0.184143976 |                              |
| chr1  | 10917292  | 10917391  | 100  | * | 3  | 1.81624E-09 | 0.001433177 | 0.005281207 | 0.001923609 | 0.080838261  | 0.068500965  |                              |
| chr14 | 104338788 | 104338807 | 20   | * | 2  | 4.08994E-09 | 0.000567771 | 0.005284939 | 0.000968591 | 0.139464543  | 0.10479601   | CTD-2134A5.4                 |
| chr11 | 72982929  | 72983405  | 477  | * | 5  | 7.18482E-14 | 0.000432296 | 0.005288943 | 0.000354365 | -0.15902084  | 0.023659114  | P2RY6                        |
| chr12 | 123956152 | 123956471 | 320  | * | 2  | 1.24439E-08 | 0.001533543 | 0.005295054 | 0.002048884 | -0.106086839 | -0.087577463 | SNRNP35, RILPL1              |
| chr6  | 30720203  | 30720484  | 282  | * | 4  | 1.79851E-09 | 0.096276869 | 0.005297847 | 0.02099248  | -0.146109703 | -0.059538927 |                              |
| chr4  | 1742776   | 1742950   | 175  | * | 3  | 1.52935E-09 | 0.002382471 | 0.005300304 | 0.002737954 | 0.162806327  | 0.030171013  | TACC3, AC016773.1            |
| chr10 | 30720010  | 30720817  | 808  | * | 5  | 6.65096E-17 | 5.90262E-06 | 0.005308273 | 1.74819E-05 | 0.245385909  | 0.154086618  |                              |
| chr17 | 924473    | 924476    | 4    | * | 2  | 7.61529E-11 | 0.000469799 | 0.00531446  | 0.000834372 | 0.148105624  | 0.122310608  | ABR                          |
| chr17 | 80112660  | 80113111  | 452  | * | 4  | 6.05203E-12 | 0.006345755 | 0.005328149 | 0.001158805 | 0.304535737  | 0.141024616  | RP11-1376P16.2, CCDC57       |
| chr18 | 9707031   | 9708454   | 1424 | * | 10 | 2.55717E-15 | 0.000722576 | 0.0053306   | 0.000985082 | -0.238705232 | -0.029692608 | RAB31                        |
| chr10 | 134236118 | 134236975 | 858  | * | 3  | 8.52788E-10 | 0.001211578 | 0.005334352 | 0.001650545 | 0.074418811  | -0.018802293 |                              |
| chr7  | 66204797  | 66206258  | 1462 | * | 6  | 2.69104E-13 | 0.0007358   | 0.005334623 | 9.72461E-05 | -0.194010109 | -0.038655365 | KCTD7, RABGEF1, RP11-792A8.4 |
| chr12 | 49449334  | 49449697  | 364  | * | 2  | 1.35147E-08 | 0.000300512 | 0.005336331 | 0.000580035 | 0.109581767  | 0.022840382  | KMT2D                        |
| chr13 | 77564706  | 77565320  | 615  | * | 3  | 2.86381E-11 | 0.020586521 | 0.005343849 | 0.0100419   | 0.276439926  | 0.116537032  | CLN5                         |
| chr2  | 30453758  | 30455589  | 1832 | * | 13 | 4.94824E-24 | 0.000355309 | 0.005347464 | 3.93473E-05 | -0.061461885 | -0.004285606 | LBH                          |
| chr4  | 25033126  | 25033520  | 395  | * | 4  | 5.07542E-12 | 0.05048545  | 0.005349198 | 0.001916964 | 0.149886255  | 0.060687616  |                              |

|       |           |           |      |   |    |             |             |             |             |              |              |                       |
|-------|-----------|-----------|------|---|----|-------------|-------------|-------------|-------------|--------------|--------------|-----------------------|
| chr16 | 8726527   | 8726753   | 227  | * | 2  | 3.18356E-08 | 0.001200216 | 0.005350221 | 0.001721542 | -0.201687928 | -0.131191144 | METTL22               |
| chr2  | 220134120 | 220134324 | 205  | * | 2  | 2.8566E-08  | 0.000967184 | 0.005354016 | 0.001466411 | 0.148478203  | 0.142901412  | TUBA4B, TUBA4A        |
| chr11 | 119558088 | 119558768 | 681  | * | 4  | 9.58934E-16 | 8.05567E-07 | 0.005357591 | 5.44306E-06 | -0.154791744 | -0.128245747 | PVRL1                 |
| chr18 | 3251477   | 3252175   | 699  | * | 4  | 2.40903E-13 | 1.87073E-05 | 0.005359903 | 4.89861E-05 | 0.131374277  | 0.090079765  | MYL12A                |
| chr3  | 132035647 | 132036382 | 736  | * | 4  | 5.22437E-10 | 0.01362335  | 0.00536025  | 0.004650442 | -0.348514519 | -0.100373368 | ACPP                  |
| chr17 | 42402347  | 42402882  | 536  | * | 6  | 1.39985E-08 | 0.276401274 | 0.005362589 | 0.018804679 | -0.01425685  | -0.003593722 |                       |
| chr11 | 33277265  | 33279136  | 1872 | * | 16 | 1.93698E-24 | 0.056531985 | 0.005365008 | 0.002684019 | -0.227835726 | -0.037772218 | HIPK3                 |
| chr19 | 10305125  | 10305305  | 181  | * | 2  | 1.24012E-08 | 0.004342213 | 0.00536689  | 0.004137747 | 0.024160443  | 0.015961218  | DNMT1                 |
| chr16 | 56459026  | 56459217  | 192  | * | 3  | 1.43814E-07 | 0.04252516  | 0.005369143 | 0.016537199 | 0.033889857  | 0.015168348  | AMFR                  |
| chr7  | 29523006  | 29523410  | 405  | * | 6  | 5.5623E-12  | 0.041327188 | 0.005375273 | 0.005712206 | -0.285981337 | -0.088027633 | CHN2                  |
| chr8  | 67563906  | 67564402  | 497  | * | 3  | 6.13253E-10 | 0.003922567 | 0.005376991 | 0.00104965  | 0.117203975  | 0.016494848  | VCPIP1                |
| chr16 | 11835468  | 11837547  | 2080 | * | 18 | 1.28535E-22 | 0.006009656 | 0.005388741 | 0.000266732 | -0.12555755  | -0.020326874 | RP11-490O6.2, TXNDC11 |
| chr7  | 1004997   | 1005089   | 93   | * | 2  | 5.27696E-08 | 0.001141936 | 0.005389239 | 0.001663623 | -0.162865516 | -0.119108539 | COX19                 |
| chr1  | 45504888  | 45504925  | 38   | * | 2  | 3.58449E-10 | 0.000273547 | 0.005392294 | 0.000537632 | 0.11711737   | 0.111707676  | ZSWIM5                |
| chr19 | 58978543  | 58978849  | 307  | * | 3  | 9.84257E-10 | 0.096209856 | 0.005392662 | 0.024030711 | 0.013768683  | 0.000688511  | ZNF324                |
| chr17 | 47865453  | 47866462  | 1010 | * | 12 | 2.23957E-13 | 0.015425655 | 0.005393728 | 0.011617872 | -0.078910854 | -0.002108465 | KAT7, FAM117A         |
| chr17 | 35850482  | 35851459  | 978  | * | 6  | 1.05092E-19 | 0.000195576 | 0.005394789 | 1.20825E-05 | -0.312801755 | -0.147255383 | DUSP14                |
| chr17 | 62308897  | 62309293  | 397  | * | 3  | 1.20014E-09 | 0.001252997 | 0.005395957 | 0.00169918  | 0.1206209    | 0.061705278  | TEX2                  |
| chr22 | 30901707  | 30902896  | 1190 | * | 5  | 4.68068E-15 | 0.007742152 | 0.005406196 | 0.001258881 | 0.158200251  | 0.06076271   |                       |
| chr16 | 57180054  | 57180175  | 122  | * | 3  | 1.39099E-08 | 0.013549825 | 0.005409031 | 0.005710665 | 0.120786031  | 0.018157971  | CPNE2                 |
| chr19 | 39832561  | 39832795  | 235  | * | 3  | 8.275E-10   | 0.055205204 | 0.005412479 | 0.010845062 | -0.024164022 | -0.001372375 | GMFG, CTC-246B18.10   |
| chr12 | 14436575  | 14436900  | 326  | * | 2  | 2.96663E-10 | 0.000706116 | 0.005426749 | 0.001157799 | 0.181917796  | 0.140047573  |                       |
| chr10 | 73516760  | 73517463  | 704  | * | 5  | 4.20726E-16 | 0.00015019  | 0.005430027 | 0.000174749 | -0.155084503 | -0.018544803 | CDH23, C10orf54       |
| chr11 | 67141686  | 67142562  | 877  | * | 7  | 6.80728E-20 | 4.13858E-05 | 0.005434149 | 5.48675E-05 | -0.141855881 | -0.049561292 |                       |
| chr1  | 151805241 | 151805661 | 421  | * | 4  | 2.09435E-11 | 0.02057158  | 0.005437039 | 0.003181507 | -0.219131197 | -0.081429925 |                       |
| chr8  | 134262768 | 134263111 | 344  | * | 2  | 7.87362E-11 | 0.000401259 | 0.005437259 | 0.00073893  | -0.179139496 | -0.123329781 | NDRG1                 |
| chr16 | 28608125  | 28608894  | 770  | * | 2  | 4.85342E-08 | 0.000241516 | 0.005439273 | 0.000485179 | 0.153234495  | 0.144635022  | SULT1A2               |
| chr22 | 24950379  | 24951987  | 1609 | * | 21 | 8.51639E-25 | 0.002922289 | 0.00544456  | 0.000249687 | -0.039040853 | 0.005714412  | SNRPD3, GUCD1         |
| chr17 | 75539901  | 75539921  | 21   | * | 3  | 1.98509E-13 | 1.23986E-05 | 0.005448361 | 4.58155E-05 | 0.190103821  | 0.164903593  |                       |



|       |           |           |      |   |    |             |             |             |             |              |              |                      |
|-------|-----------|-----------|------|---|----|-------------|-------------|-------------|-------------|--------------|--------------|----------------------|
| chr1  | 36184400  | 36185939  | 1540 | * | 11 | 1.1485E-13  | 0.035049943 | 0.005455053 | 0.002265251 | -0.174577585 | -0.012226515 | C1orf216, CLSPN      |
| chr17 | 1490023   | 1490557   | 535  | * | 3  | 2.03915E-12 | 0.000529804 | 0.005459366 | 0.000445415 | -0.287529336 | -0.155313078 | SLC43A2              |
| chr13 | 36920987  | 36921853  | 867  | * | 6  | 7.93776E-18 | 0.427401135 | 0.00546376  | 0.008706342 | -0.215846314 | -0.046202381 | SPG20OS, SPG20       |
| chr12 | 47219626  | 47221046  | 1421 | * | 14 | 2.63497E-38 | 3.87465E-11 | 0.005470358 | 2.19731E-10 | 0.369841297  | 0.133193921  | SLC38A4              |
| chr14 | 21785459  | 21785911  | 453  | * | 4  | 3.57665E-10 | 0.010910727 | 0.005483262 | 0.002631499 | 0.117423875  | 0.001256931  | RPGRIP1              |
| chr3  | 14319984  | 14320523  | 540  | * | 2  | 2.28683E-09 | 0.000162334 | 0.00548566  | 0.000346175 | -0.218189701 | -0.201370819 | RP11-536I6.2         |
| chr2  | 120413205 | 120413260 | 56   | * | 2  | 1.12588E-07 | 0.00156445  | 0.005487503 | 0.002106137 | 0.143585605  | 0.109509042  | PCDP1                |
| chr4  | 10020360  | 10021355  | 996  | * | 6  | 3.41523E-14 | 0.000810726 | 0.005490737 | 0.000415107 | -0.132779516 | -0.057020891 | SLC2A9               |
| chr20 | 32011218  | 32011533  | 316  | * | 2  | 1.8178E-08  | 0.000857618 | 0.005494437 | 0.001349889 | 0.179074603  | 0.114924274  | SNTA1                |
| chr11 | 78003296  | 78003665  | 370  | * | 3  | 1.25881E-10 | 0.004517464 | 0.005503797 | 0.001340769 | -0.285543499 | -0.170739407 | GAB2                 |
| chr10 | 82115447  | 82116392  | 946  | * | 8  | 8.22876E-13 | 0.060169275 | 0.005503942 | 0.012288963 | 0.159107835  | 0.043552416  | DYDC2, DYDC1         |
| chr2  | 24161954  | 24162667  | 714  | * | 6  | 2.09693E-15 | 0.054826336 | 0.00550751  | 0.00325179  | -0.329837895 | -0.100124461 | UBXN2A               |
| chr19 | 50269083  | 50270616  | 1534 | * | 14 | 3.60095E-28 | 5.35707E-08 | 0.005510808 | 1.19404E-07 | -0.185348237 | -0.030608312 | AP2A1                |
| chr17 | 63053929  | 63053996  | 68   | * | 2  | 3.89541E-12 | 0.000211526 | 0.005514325 | 0.000434857 | 0.147770309  | 0.123806951  |                      |
| chr16 | 69975149  | 69976228  | 1080 | * | 6  | 2.361E-14   | 0.00028342  | 0.00551685  | 0.00023999  | -0.1254998   | -0.040353061 | WWP2                 |
| chr15 | 81586571  | 81589273  | 2703 | * | 14 | 1.93051E-23 | 1.28801E-05 | 0.005517985 | 6.09582E-07 | -0.21849619  | -0.071655223 | IL16                 |
| chr2  | 202654941 | 202655138 | 198  | * | 5  | 1.588E-11   | 0.002404166 | 0.00552724  | 0.001107246 | 0.181989431  | 0.058486898  |                      |
| chr20 | 36405608  | 36405675  | 68   | * | 2  | 9.09197E-08 | 0.003302556 | 0.005527406 | 0.003523478 | -0.198692124 | -0.132085248 | CTNBL1               |
| chr8  | 97778709  | 97779220  | 512  | * | 2  | 2.46631E-08 | 0.00039514  | 0.005529434 | 0.000732814 | -0.14997683  | -0.141445987 | CPQ                  |
| chr1  | 151253959 | 151255071 | 1113 | * | 11 | 3.19294E-13 | 0.033945678 | 0.005533857 | 0.006662811 | 0.035690091  | -0.003448902 | ZNF687, RP11-126K1.2 |
| chr3  | 108180778 | 108181336 | 559  | * | 4  | 3.15814E-14 | 0.000174162 | 0.005540668 | 0.000123654 | 0.174414273  | 0.118610085  | MYH15                |
| chr3  | 51428079  | 51430288  | 2210 | * | 17 | 7.53146E-12 | 0.032240068 | 0.005547087 | 0.005884487 | -0.085475396 | -0.010648353 | RBM15B               |
| chr20 | 36153186  | 36153947  | 762  | * | 6  | 1.57296E-11 | 0.042098515 | 0.005547846 | 0.00854931  | 0.160782448  | 0.058404628  | BLCAP                |
| chr9  | 136284455 | 136284475 | 21   | * | 2  | 1.71168E-10 | 0.000372201 | 0.005553398 | 0.000698567 | -0.160212    | -0.023207657 | ADAMTS13             |
| chr13 | 41634374  | 41635251  | 878  | * | 6  | 9.71223E-14 | 0.004863042 | 0.005556253 | 0.003509509 | -0.081819389 | -0.006678136 | ELF1                 |
| chr1  | 222816858 | 222817647 | 790  | * | 5  | 6.00233E-14 | 0.00095717  | 0.005557534 | 0.000260793 | 0.152567131  | 0.055685342  | MIA3                 |
| chr12 | 52638005  | 52638158  | 154  | * | 3  | 2.38589E-08 | 0.034731736 | 0.005561705 | 0.009454841 | -0.107962396 | -0.046192261 | KRT7                 |
| chr7  | 139425741 | 139426030 | 290  | * | 2  | 2.25783E-09 | 0.000258333 | 0.005565811 | 0.000516015 | -0.221873623 | -0.046579434 | HIPK2                |
| chr17 | 43517764  | 43517795  | 32   | * | 2  | 1.45161E-08 | 0.000923204 | 0.005576083 | 0.001434528 | -0.115613842 | -0.088198074 | PLEKHM1              |

|       |           |           |      |   |    |             |             |             |             |              |              |                            |
|-------|-----------|-----------|------|---|----|-------------|-------------|-------------|-------------|--------------|--------------|----------------------------|
| chr17 | 75149960  | 75150033  | 74   | * | 2  | 2.34457E-09 | 0.000481786 | 0.005577048 | 0.000862418 | -0.199231008 | -0.134428406 | SEC14L1                    |
| chr19 | 37177434  | 37178489  | 1056 | * | 8  | 2.20607E-15 | 0.027659634 | 0.005581448 | 0.002312443 | -0.123026094 | -0.0215132   | AC074138.3                 |
| chr13 | 24843347  | 24844938  | 1592 | * | 11 | 4.7779E-26  | 0.00011815  | 0.00559183  | 6.68087E-05 | -0.348489654 | -0.065953474 | RP11-307N16.6, SPATA13     |
| chr2  | 74611500  | 74612812  | 1313 | * | 9  | 7.81673E-29 | 4.16632E-08 | 0.005593541 | 1.66379E-08 | 0.147276095  | 0.055724039  | DCTN1-AS1, DCTN1           |
| chr10 | 80848009  | 80848143  | 135  | * | 2  | 1.41944E-09 | 0.000187388 | 0.00559384  | 0.00039317  | -0.157910507 | -0.117309429 | ZMIZ1                      |
| chr13 | 32889023  | 32889994  | 972  | * | 10 | 1.19634E-25 | 2.42171E-06 | 0.005601767 | 3.55348E-06 | -0.350563113 | -0.062417429 | BRCA2, ZAR1L               |
| chr14 | 105953300 | 105954118 | 819  | * | 5  | 1.17004E-08 | 0.004885642 | 0.0056065   | 0.005042738 | 0.02679826   | 0.015447998  | CRIP1, CRIP1               |
| chr10 | 25242304  | 25242747  | 444  | * | 2  | 1.93008E-10 | 0.000179036 | 0.005607687 | 0.000378233 | 0.192741154  | 0.175984298  | RP11-165A20.3              |
| chr9  | 77502231  | 77503686  | 1456 | * | 12 | 9.31775E-23 | 0.000568193 | 0.005610704 | 0.000124676 | -0.310611804 | -0.054469817 | TRPM6                      |
| chr9  | 74383817  | 74384969  | 1153 | * | 8  | 1.65742E-14 | 0.018784595 | 0.00562232  | 0.00148316  | 0.031604695  | 0.001111744  | TMEM2                      |
| chr6  | 41472657  | 41473517  | 861  | * | 5  | 9.35302E-11 | 0.023447357 | 0.005629109 | 0.009338893 | 0.024996719  | 0.013891907  | RP11-328M4.3, RP11-328M4.2 |
| chr16 | 89608196  | 89608497  | 302  | * | 5  | 2.75397E-16 | 4.50815E-05 | 0.005633011 | 3.48585E-05 | 0.163581313  | 0.089807579  | SPG7                       |
| chr1  | 2517410   | 2518505   | 1096 | * | 13 | 8.06382E-14 | 0.0172017   | 0.005633472 | 0.010125295 | -0.059933235 | -0.021012499 | FAM213B                    |
| chr11 | 65430511  | 65430610  | 100  | * | 3  | 5.95909E-08 | 0.015762306 | 0.005636253 | 0.007881742 | -0.065234113 | -0.024923329 | RELA                       |
| chr12 | 100866177 | 100866802 | 626  | * | 4  | 7.12412E-13 | 0.006139684 | 0.005637466 | 0.000786027 | -0.176736834 | -0.054096995 |                            |
| chr13 | 47371412  | 47371987  | 576  | * | 10 | 2.84192E-12 | 0.382539025 | 0.005639234 | 0.12691355  | -0.213595081 | -0.021611591 |                            |
| chr11 | 58980377  | 58981095  | 719  | * | 5  | 1.02625E-11 | 0.001604199 | 0.005645633 | 0.001395283 | -0.162324012 | -0.039954406 | MPEG1                      |
| chr2  | 27282579  | 27282584  | 6    | * | 2  | 2.5246E-09  | 0.000450479 | 0.005648048 | 0.000819599 | 0.190928021  | 0.179584152  | AGBL5                      |
| chr14 | 90167459  | 90168307  | 849  | * | 7  | 3.09165E-11 | 0.01707796  | 0.005663268 | 0.013684036 | 0.085250887  | 0.025262105  | RP11-33N16.3               |
| chr16 | 2094109   | 2094700   | 592  | * | 5  | 7.39941E-12 | 0.000401136 | 0.005668531 | 0.000757881 | 0.141504909  | 0.074911514  | NTHL1                      |
| chr20 | 47345118  | 47345204  | 87   | * | 2  | 1.84688E-07 | 0.002580528 | 0.005691523 | 0.003028682 | -0.207940435 | -0.123052977 | PREX1                      |
| chr15 | 92490606  | 92490956  | 351  | * | 2  | 7.00617E-09 | 0.000608239 | 0.005693272 | 0.001044484 | -0.098004585 | -0.073988482 | SLCO3A1                    |
| chr3  | 13060741  | 13060974  | 234  | * | 4  | 3.74519E-12 | 0.002241691 | 0.005701839 | 0.000587657 | 0.160247689  | 0.095679532  | IQSEC1                     |
| chr20 | 42187103  | 42187837  | 735  | * | 8  | 9.3011E-15  | 0.186100339 | 0.005705568 | 0.008129961 | -0.22278827  | -0.072595911 | SGK2                       |
| chr7  | 46972570  | 46972700  | 131  | * | 2  | 1.02385E-09 | 0.000177509 | 0.005707281 | 0.000376689 | -0.154117199 | -0.117917154 | AC004901.1                 |
| chr1  | 22979387  | 22979739  | 353  | * | 5  | 1.81511E-10 | 0.026163112 | 0.005716274 | 0.00674054  | 0.098328979  | 0.043271324  | C1QB                       |
| chr19 | 45567390  | 45567904  | 515  | * | 3  | 1.06599E-08 | 0.046608028 | 0.005716881 | 0.01668493  | 0.143460274  | 0.039977642  | CLASRP                     |
| chr22 | 51019849  | 51019923  | 75   | * | 3  | 1.43035E-08 | 0.016752982 | 0.005719496 | 0.005822852 | -0.149791198 | -0.057240107 | CHKB-CPT1B, CHKB           |
| chr19 | 30432102  | 30432971  | 870  | * | 6  | 6.68117E-21 | 6.76099E-07 | 0.00572072  | 4.07857E-06 | 0.105407645  | 0.050109617  | URI1                       |

|       |           |           |      |   |    |             |             |             |             |              |              |                                  |
|-------|-----------|-----------|------|---|----|-------------|-------------|-------------|-------------|--------------|--------------|----------------------------------|
| chr6  | 32906460  | 32906526  | 67   | * | 2  | 4.88864E-08 | 0.002737722 | 0.005722941 | 0.003159181 | -0.207229355 | -0.114143892 | HLA-DMB, XXbac-BPG181M17.5       |
| chr13 | 76207486  | 76207568  | 83   | * | 2  | 6.7213E-10  | 0.000248329 | 0.00572754  | 0.000502155 | 0.126091882  | 0.125335783  | RP11-29G8.3, LMO7, RP11-173B14.5 |
| chr12 | 125019756 | 125020479 | 724  | * | 8  | 1.12707E-13 | 0.031100325 | 0.005731352 | 0.00298103  | -0.103606157 | -0.018873282 | NCOR2                            |
| chr3  | 128417740 | 128417935 | 196  | * | 2  | 5.48124E-09 | 0.000915788 | 0.005732421 | 0.001438361 | -0.103474741 | -0.047472176 |                                  |
| chr6  | 26020944  | 26021147  | 204  | * | 2  | 5.64954E-11 | 0.005836635 | 0.005733587 | 0.005116278 | 0.055369669  | 0.024015936  | HIST1H3A                         |
| chr4  | 1221838   | 1221935   | 98   | * | 2  | 1.7749E-09  | 0.00030515  | 0.005734175 | 0.000597184 | -0.188339974 | -0.171090461 | CTBP1                            |
| chr7  | 45038259  | 45039616  | 1358 | * | 10 | 1.12487E-21 | 2.19399E-05 | 0.005736323 | 4.33724E-05 | 0.195005705  | 0.004019005  | CCM2                             |
| chr7  | 75582881  | 75583421  | 541  | * | 4  | 2.75669E-11 | 0.001308181 | 0.005737896 | 0.000846963 | -0.288961427 | -0.135289313 | POR                              |
| chr1  | 161179001 | 161179293 | 293  | * | 4  | 9.57049E-10 | 0.00687655  | 0.005740998 | 0.005002648 | -0.063742478 | -0.024333173 | NDUFS2                           |
| chr6  | 153451812 | 153453173 | 1362 | * | 8  | 4.57325E-15 | 0.005550345 | 0.005744047 | 0.00070812  | -0.140060942 | -0.016160707 | RGS17                            |
| chr11 | 71725245  | 71725590  | 346  | * | 4  | 8.19108E-13 | 0.006558885 | 0.005747691 | 0.001189336 | -0.1524566   | -0.069687101 | RP11-849H4.4, NUMA1              |
| chr19 | 836606    | 836716    | 111  | * | 3  | 8.10449E-11 | 0.001529206 | 0.005754726 | 0.00076883  | -0.118508519 | -0.066348548 |                                  |
| chr8  | 77528430  | 77528456  | 27   | * | 2  | 1.87415E-09 | 0.000413635 | 0.005755185 | 0.000768304 | 0.196953366  | 0.177771166  | ZFH4-AS1                         |
| chr13 | 114918456 | 114918702 | 247  | * | 3  | 7.10721E-10 | 0.014158916 | 0.005762688 | 0.003774224 | 0.145551983  | 0.086613377  |                                  |
| chr5  | 180017195 | 180017227 | 33   | * | 2  | 8.1134E-08  | 0.040093895 | 0.005770763 | 0.013013843 | 0.032694465  | 0.021900685  | SCGB3A1                          |
| chr9  | 139554979 | 139555972 | 994  | * | 4  | 2.34169E-13 | 5.6519E-06  | 0.005778149 | 2.88018E-05 | -0.157038515 | -0.10859163  | EGFL7                            |
| chr19 | 49568106  | 49568962  | 857  | * | 5  | 3.87314E-11 | 0.229781189 | 0.005780291 | 0.019470552 | 0.165436104  | 0.052136185  | CTB-60B18.18, NTF4               |
| chr13 | 113356896 | 113357667 | 772  | * | 5  | 5.01084E-16 | 0.000293699 | 0.005780711 | 0.000137211 | -0.233985163 | -0.123105712 | ATP11A                           |
| chr5  | 90485840  | 90486010  | 171  | * | 2  | 5.30686E-10 | 0.000262667 | 0.005782521 | 0.000527591 | -0.223275066 | -0.182397625 |                                  |
| chr6  | 155054535 | 155055468 | 934  | * | 6  | 2.30394E-13 | 0.00601756  | 0.005791812 | 0.002860175 | 0.035008403  | -0.000419894 | SCAF8                            |
| chr7  | 161652    | 162052    | 401  | * | 4  | 5.65997E-08 | 0.11213197  | 0.005791867 | 0.015142328 | -0.229840268 | -0.065318979 | RP11-90P13.1                     |
| chr5  | 124057499 | 124057960 | 462  | * | 3  | 2.44128E-10 | 0.002494701 | 0.005792389 | 0.001462624 | 0.132315853  | 0.033071699  | ZNF608                           |
| chr19 | 41827759  | 41827894  | 136  | * | 2  | 8.10583E-10 | 0.00018308  | 0.005797479 | 0.000387993 | 0.151847077  | 0.139184403  | CCDC97, TGFB1                    |
| chr18 | 67624071  | 67625835  | 1765 | * | 9  | 9.35052E-15 | 0.002588852 | 0.005824003 | 0.000168233 | 0.194569171  | 0.086701965  | CD226                            |
| chr12 | 2985293   | 2986037   | 745  | * | 6  | 5.45801E-13 | 0.09784835  | 0.005830323 | 0.003999936 | -0.216444008 | -0.04386024  | RHNO1, FOXM1                     |
| chr16 | 3306524   | 3307326   | 803  | * | 5  | 6.69045E-17 | 9.88731E-06 | 0.00583434  | 2.18478E-05 | -0.305419614 | -0.130395974 | MEFV                             |
| chr14 | 31698967  | 31699236  | 270  | * | 2  | 1.69917E-08 | 0.00069836  | 0.005834783 | 0.001172702 | -0.095968317 | -0.071479472 |                                  |
| chr5  | 131723239 | 131724046 | 808  | * | 3  | 3.75078E-11 | 0.001551096 | 0.005839692 | 0.001285841 | 0.17777926   | -0.00206388  | SLC22A5                          |
| chr6  | 6657296   | 6657777   | 482  | * | 2  | 8.18845E-10 | 0.001329324 | 0.005843431 | 0.001913905 | 0.110481236  | 0.073772432  |                                  |

|       |           |           |      |   |    |             |             |             |             |              |              |                               |
|-------|-----------|-----------|------|---|----|-------------|-------------|-------------|-------------|--------------|--------------|-------------------------------|
| chr22 | 37677244  | 37678241  | 998  | * | 7  | 6.50476E-16 | 0.07865186  | 0.00584735  | 0.003460274 | 0.233609027  | 0.037258888  | CYTH4                         |
| chr8  | 22933021  | 22933496  | 476  | * | 2  | 9.90164E-10 | 0.000650655 | 0.005856973 | 0.001110467 | -0.207765943 | -0.125912513 | RP11-875O11.2                 |
| chr10 | 17428519  | 17428890  | 372  | * | 5  | 8.2646E-12  | 0.001773676 | 0.005867372 | 0.001163304 | 0.13012438   | 0.077808371  | ST8SIA6                       |
| chr15 | 78368276  | 78369232  | 957  | * | 2  | 3.92317E-08 | 0.001755352 | 0.005868753 | 0.002344833 | -0.157333688 | -0.11540452  | TBC1D2B                       |
| chr19 | 57874988  | 57875295  | 308  | * | 6  | 1.29793E-10 | 0.342341252 | 0.005875039 | 0.021062784 | -0.053056934 | -0.010793206 | ZNF547, TRAPPC2P1, AC003002.4 |
| chr4  | 2938941   | 2939149   | 209  | * | 2  | 4.75469E-08 | 0.040610622 | 0.005881039 | 0.013244985 | 0.092005674  | 0.037411824  | NOP14-AS1                     |
| chr12 | 6750437   | 6750943   | 507  | * | 6  | 9.37054E-16 | 0.006608877 | 0.005881536 | 0.000230227 | 0.150958072  | 0.0658669    | ACRBP                         |
| chr10 | 13390377  | 13390774  | 398  | * | 3  | 1.01598E-09 | 0.01182661  | 0.005884244 | 0.007375917 | -0.031228133 | -0.00405884  |                               |
| chr1  | 150943828 | 150944300 | 473  | * | 2  | 6.54985E-09 | 0.235501726 | 0.005885243 | 0.019430403 | -0.176382632 | -0.088827544 | CERS2                         |
| chr21 | 36207798  | 36208014  | 217  | * | 2  | 6.03619E-10 | 0.00053894  | 0.005892311 | 0.000957559 | -0.194101883 | -0.137194382 | RUNX1                         |
| chr1  | 19440010  | 19440269  | 260  | * | 2  | 3.95054E-08 | 0.005436587 | 0.005892538 | 0.004968108 | 0.129522136  | 0.110203304  | UBR4                          |
| chr16 | 69140530  | 69140892  | 363  | * | 3  | 1.10895E-08 | 0.187827042 | 0.005892606 | 0.023784904 | 0.031648168  | 0.005465533  | HAS3                          |
| chr17 | 913998    | 914053    | 56   | * | 2  | 9.64365E-08 | 0.002204841 | 0.005908931 | 0.002760436 | 0.146672662  | 0.125926121  | ABR                           |
| chr2  | 46524557  | 46525678  | 1122 | * | 5  | 2.94082E-14 | 0.008454246 | 0.005916013 | 0.002973624 | 0.040844064  | 0.013243911  | EPAS1                         |
| chr10 | 119134612 | 119134712 | 101  | * | 2  | 4.1301E-08  | 0.003734702 | 0.005918476 | 0.003933751 | 0.029776932  | 0.011108526  | PDZD8                         |
| chr2  | 26225713  | 26226017  | 305  | * | 3  | 1.17429E-10 | 0.000246057 | 0.005919432 | 0.000469385 | -0.13496298  | -0.098320242 |                               |
| chr5  | 76369467  | 76369633  | 167  | * | 2  | 1.87367E-08 | 0.003291162 | 0.005919793 | 0.00362275  | 0.12902249   | 0.019675946  | ZBED3                         |
| chr16 | 2262293   | 2265528   | 3236 | * | 17 | 2.61331E-17 | 0.004540733 | 0.005920786 | 8.67409E-05 | -0.150824243 | -0.012540835 | RP11-304L19.8, PGP            |
| chr4  | 40194771  | 40195318  | 548  | * | 4  | 2.80075E-10 | 0.013434416 | 0.005922992 | 0.004131458 | -0.1623559   | -0.071035892 | RHOH                          |
| chr4  | 100737138 | 100738139 | 1002 | * | 7  | 1.91414E-14 | 0.012778022 | 0.005942547 | 0.001931132 | -0.199920073 | -0.049292153 | DAPP1                         |
| chr10 | 73846858  | 73849480  | 2623 | * | 20 | 2.06367E-36 | 0.001583539 | 0.00595287  | 1.47706E-07 | 0.094123339  | -0.004330269 | SPOCK2                        |
| chr20 | 1310451   | 1310884   | 434  | * | 3  | 2.71887E-10 | 0.000552236 | 0.005956022 | 0.000975273 | 0.11454086   | 0.076523784  | SDCBP2-AS1                    |
| chr19 | 16556362  | 16556657  | 296  | * | 2  | 3.78377E-08 | 0.053270038 | 0.005968684 | 0.014652942 | -0.226102983 | -0.120585777 | EPS15L1                       |
| chr9  | 34662282  | 34663048  | 767  | * | 5  | 5.15174E-10 | 0.076848355 | 0.005974206 | 0.014966517 | -0.129804369 | -0.013764105 | CCL27, RP11-195F19.30         |
| chr6  | 40567553  | 40567579  | 27   | * | 2  | 5.70701E-08 | 0.004930813 | 0.005977547 | 0.004711426 | 0.094226495  | 0.087138104  |                               |
| chr12 | 41868018  | 41868324  | 307  | * | 2  | 3.72391E-09 | 0.000297586 | 0.005979799 | 0.000590238 | 0.163337691  | 0.121340985  | PDZRN4                        |
| chr3  | 119318411 | 119318672 | 262  | * | 3  | 1.06842E-08 | 0.003082362 | 0.005982213 | 0.002802982 | 0.142315866  | 0.058152312  | PLA1A                         |
| chr10 | 81034149  | 81034736  | 588  | * | 4  | 4.21819E-12 | 0.001199406 | 0.005986308 | 0.001070095 | -0.197207878 | -0.119164571 | ZMIZ1                         |
| chr12 | 58175385  | 58176175  | 791  | * | 3  | 2.98986E-11 | 0.008057914 | 0.005987092 | 0.002760117 | 0.123109648  | 0.016218069  | METTL21B, RP11-571M6.15       |

|       |           |           |      |   |    |             |             |             |             |              |              |                                 |
|-------|-----------|-----------|------|---|----|-------------|-------------|-------------|-------------|--------------|--------------|---------------------------------|
| chr5  | 150460100 | 150460163 | 64   | * | 2  | 1.11746E-07 | 0.098192787 | 0.005987608 | 0.017285021 | 0.017939456  | 0.00696831   | TNIP1                           |
| chr3  | 12219504  | 12219682  | 179  | * | 2  | 5.34591E-09 | 0.000367092 | 0.005988881 | 0.000703244 | -0.153492927 | -0.131260246 | SYN2                            |
| chr2  | 102577397 | 102577876 | 480  | * | 2  | 1.02352E-08 | 0.000637641 | 0.005991111 | 0.001099876 | -0.217106905 | -0.167414317 |                                 |
| chr22 | 39639003  | 39639859  | 857  | * | 4  | 4.10706E-10 | 0.001362198 | 0.00600521  | 0.001219939 | 0.046813503  | 0.014986526  | PDGFB                           |
| chr6  | 170532633 | 170532835 | 203  | * | 4  | 1.72987E-11 | 0.003325412 | 0.006008156 | 0.001134636 | -0.068055108 | -0.047553554 |                                 |
| chr8  | 24769895  | 24771645  | 1751 | * | 15 | 7.54968E-18 | 0.000657277 | 0.006008305 | 0.000167327 | 0.09694678   | 0.026719931  | NEFM, GS1-72M22.1               |
| chr5  | 124081066 | 124081950 | 885  | * | 5  | 2.38568E-10 | 0.095813717 | 0.006023851 | 0.015067377 | -0.127215247 | -0.045502977 | ZNF608                          |
| chr7  | 47306613  | 47306668  | 56   | * | 2  | 2.95601E-09 | 0.000470075 | 0.00603292  | 0.000862806 | 0.193263207  | 0.154820849  |                                 |
| chr6  | 109010947 | 109011288 | 342  | * | 4  | 2.14434E-10 | 0.051255483 | 0.006034908 | 0.003446607 | -0.182262346 | -0.077493746 |                                 |
| chr16 | 2136269   | 2136968   | 700  | * | 7  | 4.89354E-11 | 0.007301212 | 0.006035754 | 0.00457922  | -0.046859519 | 0.0048761    | TSC2                            |
| chr12 | 117042854 | 117042895 | 42   | * | 2  | 3.147E-08   | 0.000757181 | 0.00603916  | 0.001261909 | -0.152033493 | -0.125560897 |                                 |
| chr1  | 54618655  | 54619895  | 1241 | * | 11 | 5.36835E-19 | 0.000644523 | 0.006045457 | 0.000353582 | -0.279480148 | -0.025393168 | CDCP2, RP11-446E24.4            |
| chr10 | 99093461  | 99094391  | 931  | * | 4  | 4.07979E-10 | 0.064395333 | 0.006045771 | 0.001932738 | 0.028770698  | 0.011859311  | RP11-452K12.4, FRAT2            |
| chr4  | 148653439 | 148653917 | 479  | * | 7  | 2.14617E-11 | 0.019584922 | 0.00604628  | 0.008060066 | 0.033481559  | 0.001580384  | ARHGAP10                        |
| chr11 | 69259247  | 69261044  | 1798 | * | 9  | 1.67528E-20 | 2.76662E-06 | 0.00605327  | 3.96547E-06 | -0.270560867 | -0.119422371 | AP000439.2                      |
| chr17 | 16367146  | 16367232  | 87   | * | 2  | 2.65643E-09 | 0.000914873 | 0.006060331 | 0.001462534 | 0.187845647  | 0.139659507  | FAM211A-AS1, FAM211A            |
| chr20 | 48728064  | 48728642  | 579  | * | 3  | 9.21866E-11 | 0.000327749 | 0.006061862 | 0.00070543  | 0.153587942  | 0.097007017  | UBE2V1, TMEM189-UBE2V1, TMEM189 |
| chr17 | 26899172  | 26899686  | 515  | * | 5  | 5.33007E-10 | 0.057724811 | 0.00607242  | 0.024937674 | 0.161356466  | 0.065363479  | RP11-192H23.4                   |
| chr1  | 61547969  | 61548526  | 558  | * | 8  | 7.40439E-09 | 0.522918665 | 0.006072809 | 0.116680776 | 0.024896387  | -0.004501696 | NFIA                            |
| chr12 | 56327037  | 56327217  | 181  | * | 2  | 2.66964E-10 | 0.000766535 | 0.006088783 | 0.001277133 | -0.130503321 | -0.109947731 | DGKA                            |
| chr1  | 198648220 | 198649066 | 847  | * | 4  | 6.42318E-10 | 0.007742359 | 0.006091477 | 0.000945834 | -0.20245591  | -0.114963625 | PTPRC, PEBP1P3                  |
| chr9  | 37485478  | 37485592  | 115  | * | 2  | 4.64851E-09 | 0.00042148  | 0.00609246  | 0.000791214 | 0.136950783  | 0.134040455  |                                 |
| chr14 | 69526817  | 69526840  | 24   | * | 2  | 2.21574E-08 | 0.000622643 | 0.00609869  | 0.001084646 | 0.111089044  | 0.102730997  | DCAF5                           |
| chr17 | 36858826  | 36859078  | 253  | * | 2  | 5.94271E-09 | 0.013203504 | 0.0061005   | 0.008320434 | 0.015588704  | 0.009936984  | CTB-58E17.1                     |
| chr1  | 170043489 | 170044179 | 691  | * | 8  | 1.12084E-13 | 0.0338779   | 0.006101906 | 0.004137589 | -0.059547802 | -0.01538543  | KIFAP3                          |
| chr21 | 47738771  | 47738804  | 34   | * | 2  | 4.28659E-10 | 0.000302888 | 0.006105875 | 0.000601779 | -0.150385381 | -0.130119164 | C21orf58                        |
| chr2  | 135471997 | 135472528 | 532  | * | 3  | 7.87399E-11 | 0.000116785 | 0.00610719  | 0.000313588 | 0.150912998  | 0.062661463  | TMEM163                         |
| chr6  | 1389146   | 1389367   | 222  | * | 3  | 1.61177E-08 | 0.036955907 | 0.006114361 | 0.016304978 | 0.054876448  | 0.025411372  |                                 |
| chr11 | 66113995  | 66114776  | 782  | * | 4  | 1.06307E-10 | 0.001046144 | 0.006121002 | 0.001268364 | 0.117859767  | 0.034437861  | B3GNT1                          |

|       |           |           |      |   |    |             |             |             |             |              |              |                                           |
|-------|-----------|-----------|------|---|----|-------------|-------------|-------------|-------------|--------------|--------------|-------------------------------------------|
| chr22 | 50154174  | 50155070  | 897  | * | 3  | 2.96277E-08 | 0.003911776 | 0.006125905 | 0.000974397 | -0.162514516 | -0.113214165 |                                           |
| chr3  | 10374067  | 10375226  | 1160 | * | 3  | 1.1928E-09  | 2.16714E-05 | 0.006146966 | 7.39532E-05 | 0.149205777  | 0.051472983  | ATP2B2                                    |
| chr2  | 219536975 | 219537816 | 842  | * | 4  | 1.53317E-13 | 0.005363983 | 0.00615449  | 0.002584827 | -0.153350416 | -0.025353205 | STK36, RNF25                              |
| chr15 | 41191138  | 41191151  | 14   | * | 2  | 1.32084E-09 | 0.000357778 | 0.006157349 | 0.000692868 | -0.155296457 | -0.151810737 | VPS18                                     |
| chr3  | 129146731 | 129147397 | 667  | * | 3  | 1.81927E-08 | 0.023237324 | 0.006165706 | 0.004383777 | -0.063811249 | -0.028053924 | EFCAB12                                   |
| chr2  | 225809244 | 225809808 | 565  | * | 4  | 1.17353E-09 | 0.012418028 | 0.006170523 | 0.001835591 | -0.216461362 | -0.017488157 | DOCK10                                    |
| chr17 | 76886835  | 76887311  | 477  | * | 3  | 3.55879E-10 | 0.00575883  | 0.006176065 | 0.002703047 | -0.142214733 | -0.059324588 | TIMP2, DDC8                               |
| chr4  | 178229651 | 178231443 | 1793 | * | 15 | 1.12167E-27 | 6.58421E-06 | 0.006176664 | 1.54461E-05 | -0.306903847 | -0.039594915 | NEIL3                                     |
| chr15 | 90735063  | 90735422  | 360  | * | 3  | 2.15839E-12 | 5.48693E-05 | 0.006182073 | 0.000144642 | 0.196380732  | 0.132034055  | SEMA4B                                    |
| chr12 | 57923710  | 57924237  | 528  | * | 2  | 2.89968E-10 | 0.000209553 | 0.006184709 | 0.000441165 | -0.184452529 | -0.034069598 | MBD6, DCTN2                               |
| chr17 | 61915833  | 61916730  | 898  | * | 5  | 7.49066E-14 | 0.045178931 | 0.006185948 | 0.002119491 | -0.195422276 | -0.090979051 | SMARCD2                                   |
| chr4  | 7780490   | 7781082   | 593  | * | 3  | 1.0016E-10  | 0.000196509 | 0.006202016 | 0.000352053 | 0.132960077  | 0.08315326   | AFAP1-AS1, AFAP1                          |
| chr17 | 3807247   | 3807312   | 66   | * | 2  | 5.36446E-08 | 0.002158242 | 0.006210677 | 0.002773093 | -0.180489617 | -0.11041623  | P2RX1                                     |
| chr5  | 65735649  | 65736106  | 458  | * | 2  | 9.05655E-09 | 0.000483152 | 0.006218191 | 0.000889043 | -0.13846247  | -0.006372074 |                                           |
| chr20 | 20348331  | 20348687  | 357  | * | 3  | 1.33247E-10 | 0.018484707 | 0.006222425 | 0.005171762 | 0.032176239  | 0.014221054  |                                           |
| chr19 | 35629576  | 35630651  | 1076 | * | 14 | 3.39379E-31 | 0.001304817 | 0.006231205 | 7.32587E-06 | -0.208151097 | -0.061894145 | FXVD1, CTD-2527I21.4, LGI4,<br>ACO20907.2 |
| chr7  | 157405010 | 157405170 | 161  | * | 2  | 9.58539E-09 | 0.006225123 | 0.006231381 | 0.005540676 | 0.134632678  | 0.098200146  | PTPRN2                                    |
| chr15 | 75660047  | 75660780  | 734  | * | 6  | 4.8783E-12  | 0.00552427  | 0.006235336 | 0.005650083 | 0.051678853  | 0.014556974  | RP11-817O13.8, MAN2C1                     |
| chr8  | 42400563  | 42400586  | 24   | * | 2  | 8.19446E-10 | 0.000400001 | 0.006236899 | 0.000762175 | 0.115591807  | 0.10185732   | SMIM19                                    |
| chr8  | 103803399 | 103803666 | 268  | * | 2  | 5.92916E-09 | 0.00035784  | 0.00623806  | 0.000695037 | -0.092902365 | -0.079040896 |                                           |
| chr7  | 39989471  | 39990544  | 1074 | * | 11 | 3.08327E-13 | 0.22931717  | 0.00624664  | 0.034056027 | 0.035194581  | 0.00348593   | CDK13                                     |
| chr8  | 144634355 | 144634524 | 170  | * | 3  | 4.697E-13   | 0.000349415 | 0.006252597 | 0.000736295 | -0.086631623 | -0.05637091  |                                           |
| chr2  | 9770727   | 9771671   | 945  | * | 9  | 4.88057E-13 | 0.020449269 | 0.006256753 | 0.00781993  | -0.12022887  | -0.002997884 | YWHAQ                                     |
| chr1  | 226830923 | 226832000 | 1078 | * | 3  | 4.11937E-12 | 2.97946E-05 | 0.006269656 | 9.63385E-05 | -0.223083532 | -0.12901899  | ITPKB                                     |
| chr12 | 118745017 | 118745504 | 488  | * | 3  | 6.58409E-09 | 0.001295453 | 0.006275541 | 0.001745144 | -0.134601868 | -0.076638218 | TAOK3                                     |
| chr14 | 72064773  | 72065164  | 392  | * | 3  | 1.14468E-10 | 0.003308039 | 0.006294518 | 0.001322992 | -0.13425073  | -0.063050357 | SIPA1L1                                   |
| chr22 | 19929557  | 19930802  | 1246 | * | 6  | 5.84409E-13 | 0.000110813 | 0.006295305 | 0.000123894 | -0.258772601 | -0.070469457 | COMT                                      |
| chr6  | 157890509 | 157890698 | 190  | * | 2  | 1.01238E-07 | 0.001617134 | 0.006310236 | 0.00226975  | -0.131878951 | -0.08657177  | ZDHHC14                                   |
| chr6  | 154689546 | 154689719 | 174  | * | 2  | 2.36667E-09 | 0.000213896 | 0.006319682 | 0.000450854 | -0.277596118 | -0.194119822 |                                           |

|       |           |           |      |   |    |             |             |             |             |              |              |                       |
|-------|-----------|-----------|------|---|----|-------------|-------------|-------------|-------------|--------------|--------------|-----------------------|
| chr10 | 16741464  | 16741619  | 156  | * | 3  | 8.85537E-08 | 0.004900599 | 0.00632345  | 0.00478208  | 0.103740841  | 0.081774963  | RSU1                  |
| chr3  | 30654871  | 30656010  | 1140 | * | 5  | 1.33254E-10 | 0.000216818 | 0.006325772 | 9.65461E-05 | -0.214089228 | -0.067350566 | TGFBR2                |
| chr16 | 88568237  | 88569490  | 1254 | * | 9  | 3.9534E-22  | 2.39256E-06 | 0.006326539 | 2.91254E-06 | 0.225917219  | 0.090398604  | ZFPM1                 |
| chr1  | 45190519  | 45190912  | 394  | * | 2  | 3.04542E-08 | 0.634949137 | 0.006346554 | 0.021475356 | -0.180522616 | -0.085425614 | C1orf228              |
| chr1  | 90032648  | 90032655  | 8    | * | 2  | 8.8914E-08  | 0.001562754 | 0.006360771 | 0.00222014  | -0.099186939 | -0.069895784 | LRR8B                 |
| chr3  | 43732993  | 43733831  | 839  | * | 4  | 6.47582E-11 | 0.004344141 | 0.006361698 | 0.004363391 | -0.239155    | -0.052319731 | ABHD5, ANO10          |
| chr11 | 75898195  | 75898203  | 9    | * | 2  | 2.3314E-10  | 0.000222233 | 0.006368928 | 0.000466607 | 0.169373356  | 0.143883448  | WNT11                 |
| chr20 | 30060822  | 30061679  | 858  | * | 7  | 1.10138E-15 | 0.002493862 | 0.006369314 | 0.000315291 | 0.149036933  | 0.065465034  | DEFB124               |
| chr15 | 41851964  | 41852193  | 230  | * | 3  | 8.62272E-10 | 0.013303114 | 0.006383176 | 0.006680069 | -0.064634297 | -0.038342743 | TYRO3                 |
| chr22 | 23161339  | 23161379  | 41   | * | 3  | 5.73587E-09 | 0.001757746 | 0.006388736 | 0.002329099 | 0.141769345  | 0.069910398  |                       |
| chr1  | 108506812 | 108507910 | 1099 | * | 11 | 8.01014E-13 | 0.152835511 | 0.006396052 | 0.039745497 | -0.049412957 | -0.002640764 | VAV3-AS1, VAV3        |
| chr3  | 128792713 | 128792776 | 64   | * | 3  | 1.19739E-10 | 0.000412777 | 0.006397085 | 0.000815173 | 0.102656447  | 0.072989926  |                       |
| chr1  | 211779938 | 211780386 | 449  | * | 2  | 2.86137E-09 | 0.000243319 | 0.006397348 | 0.00050473  | -0.170058284 | -0.148155419 |                       |
| chr1  | 110610995 | 110612044 | 1050 | * | 6  | 6.17924E-14 | 0.013269724 | 0.006397407 | 0.002747202 | 0.066890166  | 0.033922685  | STRIP1, ALX3          |
| chr16 | 67466260  | 67466470  | 211  | * | 2  | 7.39658E-08 | 0.058311342 | 0.006405792 | 0.015854215 | 0.127748172  | 0.057121871  | HSD11B2               |
| chr22 | 21983606  | 21984483  | 878  | * | 7  | 1.94267E-09 | 0.078143174 | 0.006408149 | 0.030150343 | -0.019731736 | -0.00209434  | YDJC                  |
| chr8  | 67975874  | 67976534  | 661  | * | 6  | 4.75233E-17 | 0.001078092 | 0.006414969 | 0.000660941 | -0.335880437 | -0.132863281 | CSPP1, COPS5          |
| chr4  | 10458049  | 10458667  | 619  | * | 5  | 1.08811E-11 | 0.008419819 | 0.006420221 | 0.005613077 | 0.193713656  | 0.052820975  | ZNF518B               |
| chr19 | 49126940  | 49127660  | 721  | * | 6  | 1.46316E-14 | 0.000150825 | 0.006425862 | 0.0003688   | 0.158804877  | 0.033559272  | SPHK2, AC022154.7     |
| chr2  | 161127677 | 161127827 | 151  | * | 2  | 1.8178E-07  | 0.025400108 | 0.006429124 | 0.011689225 | 0.096224796  | 0.042974439  | ITGB6                 |
| chr6  | 31683051  | 31683352  | 302  | * | 6  | 7.33868E-16 | 2.76974E-05 | 0.006439975 | 6.14544E-05 | 0.180751507  | 0.103521821  | LY6G6F, MEGT1, LY6G6D |
| chr12 | 68042072  | 68043561  | 1490 | * | 8  | 2.1189E-14  | 0.001339855 | 0.006440128 | 0.000717741 | -0.091895788 | -0.025902225 | DYRK2                 |
| chr2  | 232530555 | 232531087 | 533  | * | 2  | 1.29537E-09 | 0.000218759 | 0.006441465 | 0.000461317 | 0.107727997  | 0.028478734  |                       |
| chr11 | 3175007   | 3175636   | 630  | * | 3  | 1.19028E-12 | 1.12863E-05 | 0.006442384 | 4.53016E-05 | -0.138770614 | -0.099345041 | OSBPL5                |
| chr11 | 117150669 | 117150989 | 321  | * | 3  | 3.47585E-10 | 0.001000152 | 0.0064431   | 0.00096636  | 0.179309878  | 0.112444883  | RNF214                |
| chr19 | 39902727  | 39903392  | 666  | * | 5  | 3.30054E-10 | 0.194896413 | 0.006446657 | 0.046522294 | 0.031171163  | 0.001899207  | PLEKHG2               |
| chr6  | 170535321 | 170536124 | 804  | * | 8  | 9.9337E-12  | 0.042907417 | 0.006449657 | 0.001856151 | -0.225967352 | -0.072027528 |                       |
| chr12 | 7260403   | 7261227   | 825  | * | 12 | 8.42799E-13 | 0.113297398 | 0.006450147 | 0.039189591 | -0.236038056 | -0.00845408  | C1RL-AS1, C1RL        |
| chr11 | 110299342 | 110301128 | 1787 | * | 11 | 2.31059E-18 | 0.012095739 | 0.006450589 | 0.000413373 | -0.13164189  | -0.029175604 | FDX1                  |

|       |           |           |      |   |    |             |             |             |             |              |              |                                  |
|-------|-----------|-----------|------|---|----|-------------|-------------|-------------|-------------|--------------|--------------|----------------------------------|
| chr16 | 86017231  | 86017380  | 150  | * | 2  | 1.77989E-08 | 0.009292801 | 0.006457795 | 0.007116032 | -0.144063839 | -0.092255941 | RP11-542M13.2                    |
| chr11 | 16834800  | 16834902  | 103  | * | 2  | 2.79907E-09 | 0.000227106 | 0.006461462 | 0.000476692 | -0.152964774 | -0.139116792 | PLEKHA7                          |
| chr16 | 69362128  | 69363236  | 1109 | * | 6  | 3.62553E-14 | 0.012818988 | 0.00646718  | 0.000792356 | -0.136347429 | -0.058017587 | COG8, PDF, RP11-343C2.12         |
| chr20 | 31072454  | 31072777  | 324  | * | 3  | 7.69827E-09 | 0.012964862 | 0.006473041 | 0.006307876 | -0.165171763 | -0.059240401 | C20orf112                        |
| chr1  | 45277159  | 45277354  | 196  | * | 2  | 1.68912E-09 | 0.002209143 | 0.006474505 | 0.002864515 | 0.184718181  | 0.116380005  | BTBD19                           |
| chr5  | 1168528   | 1169632   | 1105 | * | 5  | 8.03375E-13 | 0.016907669 | 0.006479193 | 0.002833407 | -0.193908537 | -0.066712217 |                                  |
| chr20 | 48807167  | 48808334  | 1168 | * | 9  | 1.00339E-11 | 0.05027479  | 0.006485246 | 0.004449067 | -0.068068423 | -0.003280496 | CEBPB                            |
| chr8  | 86290450  | 86291400  | 951  | * | 4  | 3.70029E-10 | 0.015433229 | 0.006488987 | 0.002118826 | 0.123700403  | 0.014776166  | CA3, CA1                         |
| chr16 | 2801009   | 2802372   | 1364 | * | 14 | 2.48807E-17 | 0.160750333 | 0.006489989 | 0.007981341 | 0.138603159  | 0.021076195  | SRRM2, SRRM2-AS1                 |
| chr9  | 35658010  | 35658919  | 910  | * | 5  | 1.73942E-12 | 0.006197615 | 0.006490025 | 0.001685449 | -0.061165012 | -0.021071581 | CCDC107, RMRP, ARHGEF39          |
| chr2  | 96990480  | 96991791  | 1312 | * | 13 | 5.11579E-19 | 0.000336549 | 0.006498806 | 0.000310351 | -0.058673041 | 0.005301131  | ITPRIPL1                         |
| chr17 | 46687312  | 46687865  | 554  | * | 3  | 3.90343E-10 | 0.098660062 | 0.006500064 | 0.025333689 | 0.039032476  | 0.014335603  | HOXB7                            |
| chr13 | 111159111 | 111160844 | 1734 | * | 7  | 2.11637E-16 | 0.000290235 | 0.006509881 | 1.99479E-05 | 0.160296649  | 0.080089617  | COL4A2, COL4A2-AS1               |
| chr11 | 118476352 | 118476517 | 166  | * | 2  | 4.44267E-08 | 0.018498892 | 0.006510013 | 0.010205954 | -0.175032095 | -0.078509611 |                                  |
| chr11 | 44626708  | 44628259  | 1552 | * | 7  | 6.77329E-17 | 0.004428743 | 0.006513296 | 0.000361653 | -0.230636044 | -0.045374637 | CD82, RP11-58K22.5, RP11-58K22.4 |
| chr15 | 85923174  | 85924342  | 1169 | * | 12 | 2.42424E-18 | 0.007611032 | 0.006515214 | 0.001647071 | 0.031798437  | 0.005425485  | AKAP13                           |
| chr11 | 126326411 | 126326696 | 286  | * | 2  | 5.12359E-09 | 0.000364184 | 0.006515487 | 0.000712266 | 0.121198161  | 0.0993166    | KIRREL3                          |
| chr4  | 1195845   | 1196179   | 335  | * | 3  | 8.0997E-14  | 2.12404E-05 | 0.006517706 | 7.76297E-05 | -0.161080671 | -0.118951523 | SPON2                            |
| chr1  | 52608409  | 52608614  | 206  | * | 3  | 3.45542E-10 | 0.068002001 | 0.00653296  | 0.020032748 | 0.020549754  | 0.002054049  | ZFYVE9                           |
| chr12 | 102090101 | 102091773 | 1673 | * | 13 | 8.68026E-23 | 0.015598063 | 0.006535028 | 0.000559337 | -0.236561547 | -0.026331585 | CHPT1                            |
| chr13 | 107214319 | 107214359 | 41   | * | 2  | 2.72275E-08 | 0.001418125 | 0.006539829 | 0.002087023 | 0.17796244   | 0.167104416  | ARGLU1                           |
| chr6  | 15662707  | 15664231  | 1525 | * | 15 | 5.71102E-14 | 0.060564114 | 0.006541231 | 0.015101407 | 0.169100669  | 0.010692131  | DTNBP1                           |
| chr16 | 70733234  | 70734327  | 1094 | * | 7  | 4.819E-21   | 3.03736E-06 | 0.006542799 | 2.54463E-06 | -0.207083242 | -0.101920707 | VAC14                            |
| chr4  | 186124639 | 186124759 | 121  | * | 2  | 1.88332E-09 | 0.038242841 | 0.006544824 | 0.01394166  | 0.026971542  | 0.014987762  | KIAA1430                         |
| chr3  | 46989208  | 46989655  | 448  | * | 2  | 2.14326E-09 | 0.001127228 | 0.006546675 | 0.001757415 | -0.171799738 | -0.033366601 | CCDC12                           |
| chr13 | 108919855 | 108921244 | 1390 | * | 5  | 1.01646E-13 | 2.92109E-05 | 0.006557644 | 4.92045E-05 | -0.229269031 | -0.119057125 | TNFSF13B                         |
| chr19 | 44009237  | 44009549  | 313  | * | 4  | 1.06581E-08 | 0.032021253 | 0.006559154 | 0.014868404 | 0.164677349  | 0.067948593  |                                  |
| chr22 | 20747254  | 20747837  | 584  | * | 4  | 1.13245E-09 | 0.06263392  | 0.00655972  | 0.026247287 | -0.278262546 | -0.071144194 |                                  |
| chr8  | 144679690 | 144680433 | 744  | * | 9  | 6.00441E-12 | 0.142493597 | 0.006561512 | 0.040182576 | 0.032916419  | 0.005967874  | TIGD5, EEF1D                     |



|       |           |           |      |   |    |             |             |             |             |              |              |                       |
|-------|-----------|-----------|------|---|----|-------------|-------------|-------------|-------------|--------------|--------------|-----------------------|
| chr2  | 206628088 | 206629314 | 1227 | * | 12 | 1.00032E-31 | 7.42092E-09 | 0.006563566 | 2.98426E-08 | 0.201750187  | 0.105288314  | NRP2, AC007362.3      |
| chr1  | 156818592 | 156819393 | 802  | * | 6  | 2.38243E-11 | 0.008481421 | 0.006566325 | 0.002082844 | -0.113332841 | 0.01599327   | NTRK1, INSR           |
| chr5  | 1103325   | 1103453   | 129  | * | 2  | 6.31302E-08 | 0.052606238 | 0.006567619 | 0.015622371 | 0.115894291  | 0.066974869  | SLC12A7               |
| chr5  | 169739625 | 169740386 | 762  | * | 4  | 8.95487E-12 | 0.002519287 | 0.006573496 | 0.001220431 | -0.27859326  | -0.107609398 | CTB-114C7.4           |
| chr8  | 30299680  | 30300306  | 627  | * | 7  | 5.98365E-13 | 0.008176537 | 0.006580332 | 0.002823948 | 0.167378204  | 0.045612663  | RBPM5                 |
| chr19 | 14062697  | 14063471  | 775  | * | 9  | 5.68423E-19 | 0.003018624 | 0.006581089 | 0.000119843 | 0.036545698  | 0.004511442  | DCAF15, PODNL1        |
| chr2  | 178256731 | 178257342 | 612  | * | 9  | 2.69056E-16 | 0.019734174 | 0.006583068 | 0.009717985 | -0.317378822 | -0.04176924  | NFE2L2, AC074286.1    |
| chr19 | 18110560  | 18111886  | 1327 | * | 10 | 1.50289E-17 | 0.000108382 | 0.006585271 | 3.24836E-05 | 0.166756992  | 0.050644585  | KCNN1                 |
| chr19 | 1622280   | 1623075   | 796  | * | 6  | 2.77658E-15 | 0.015563929 | 0.006589556 | 0.002408989 | -0.283345008 | -0.079595614 | TCF3                  |
| chr2  | 160589097 | 160589392 | 296  | * | 3  | 6.23896E-09 | 0.147991226 | 0.006593428 | 0.003873481 | -0.201825108 | -0.103637383 | MARCH7                |
| chr12 | 110464779 | 110465221 | 443  | * | 3  | 3.35029E-11 | 0.002263142 | 0.006600944 | 0.000938187 | -0.234365814 | -0.118158663 | ANKRD13A              |
| chr4  | 185671960 | 185672248 | 289  | * | 3  | 7.56444E-12 | 8.56191E-05 | 0.00660738  | 0.000226377 | 0.134581966  | 0.069054382  |                       |
| chr10 | 11615505  | 11615853  | 349  | * | 3  | 5.96527E-10 | 0.000796239 | 0.006607615 | 0.001239354 | -0.143048224 | -0.070023806 | USP6NL                |
| chr20 | 17854235  | 17854245  | 11   | * | 2  | 6.28976E-09 | 0.000509109 | 0.006621526 | 0.000942493 | -0.183112427 | -0.14248622  |                       |
| chr1  | 172112722 | 172114419 | 1698 | * | 10 | 8.30321E-13 | 0.020829209 | 0.006628466 | 0.002525567 | 0.179028147  | 0.053621476  | DNM3, DN3OS, MIR199A2 |
| chr11 | 93271083  | 93271677  | 595  | * | 5  | 2.87725E-15 | 0.00435794  | 0.006633972 | 0.000115074 | -0.151297416 | -0.093287941 | SMCO4                 |
| chr21 | 34773372  | 34775045  | 1674 | * | 11 | 3.15549E-24 | 0.000291856 | 0.006640624 | 2.9833E-05  | -0.357833497 | -0.098935949 |                       |
| chr6  | 42951711  | 42952586  | 876  | * | 14 | 3.89134E-17 | 0.008425853 | 0.006653892 | 0.001829297 | -0.075500644 | -0.009938113 | PPP2R5D               |
| chr5  | 150473002 | 150473165 | 164  | * | 2  | 6.94957E-09 | 0.000470222 | 0.006655217 | 0.000884308 | -0.058000928 | -0.057643719 | TNIP1                 |
| chr3  | 39322541  | 39323729  | 1189 | * | 10 | 1.11672E-13 | 0.190982923 | 0.006659076 | 0.021493701 | -0.120747503 | 0.000962817  | CX3CR1                |
| chr11 | 125757328 | 125757446 | 119  | * | 4  | 2.85443E-08 | 0.010940741 | 0.006667298 | 0.007898673 | 0.0224709    | 0.007333595  | HYLS1                 |
| chr22 | 45636109  | 45636477  | 369  | * | 3  | 2.99542E-09 | 0.037084375 | 0.006672316 | 0.017423554 | 0.019947554  | 0.004081637  | KIAA0930              |
| chr16 | 11589604  | 11589683  | 80   | * | 2  | 1.91654E-08 | 0.000677451 | 0.006679348 | 0.001189301 | 0.116572902  | 0.09208576   | CTD-3088G3.8          |
| chr12 | 45970012  | 45970082  | 71   | * | 2  | 6.94138E-09 | 0.000362096 | 0.006679377 | 0.000712795 | -0.120814086 | -0.110734112 | RP11-352M15.1         |
| chr16 | 54325129  | 54325319  | 191  | * | 2  | 3.91021E-08 | 0.056395515 | 0.006680691 | 0.016169604 | 0.067585416  | 0.045810803  |                       |
| chr21 | 46954058  | 46954883  | 826  | * | 4  | 6.48426E-13 | 0.000598792 | 0.006680912 | 0.000490756 | -0.150143074 | -0.096090089 | SLC19A1               |
| chr14 | 104027293 | 104028127 | 835  | * | 2  | 2.06129E-09 | 0.03308861  | 0.006685903 | 0.013375086 | 0.116860876  | 0.051111694  | RP11-894P9.2, BAG5    |
| chr12 | 123520574 | 123520699 | 126  | * | 2  | 2.66073E-09 | 0.000381052 | 0.006687988 | 0.000744028 | 0.149416988  | 0.144685017  | PITPNM2               |
| chr17 | 954410    | 954490    | 81   | * | 2  | 2.11759E-08 | 0.001745831 | 0.006689328 | 0.002450344 | 0.169615903  | 0.132832854  | ABR                   |

|       |           |           |      |   |    |             |             |             |             |              |              |                       |
|-------|-----------|-----------|------|---|----|-------------|-------------|-------------|-------------|--------------|--------------|-----------------------|
| chr16 | 71843250  | 71844250  | 1001 | * | 7  | 2.01792E-22 | 0.000711063 | 0.006692447 | 0.000110319 | -0.246907554 | -0.027727245 |                       |
| chr17 | 52938144  | 52938163  | 20   | * | 2  | 1.45329E-08 | 0.001074399 | 0.006692804 | 0.001706188 | 0.133832616  | 0.114209405  |                       |
| chr20 | 52492209  | 52492248  | 40   | * | 2  | 7.9904E-10  | 0.000316209 | 0.006698519 | 0.000636492 | -0.305431563 | -0.270038774 |                       |
| chr2  | 208393204 | 208394839 | 1636 | * | 11 | 1.67134E-17 | 8.62636E-05 | 0.006699792 | 5.98928E-05 | 0.182250277  | -0.002918397 | CREB1, AC007879.5     |
| chr1  | 51730449  | 51730576  | 128  | * | 2  | 5.83696E-08 | 0.005767543 | 0.006701959 | 0.00547993  | 0.160242994  | 0.115828616  | RNF11                 |
| chr3  | 52316234  | 52316296  | 63   | * | 2  | 1.98743E-07 | 0.001948364 | 0.006714952 | 0.002656151 | -0.173215424 | -0.143774149 | WDR82                 |
| chr7  | 73669010  | 73669227  | 218  | * | 4  | 4.70126E-08 | 0.008235513 | 0.006721863 | 0.00614818  | -0.01904712  | -0.006701819 |                       |
| chr14 | 64909105  | 64909251  | 147  | * | 3  | 3.59337E-09 | 0.001735166 | 0.006727055 | 0.001931438 | 0.09969482   | 0.079033903  | MTHFD1, CTD-2555O16.2 |
| chr13 | 51289696  | 51289912  | 217  | * | 4  | 7.37203E-17 | 1.06263E-06 | 0.006728739 | 7.03768E-06 | -0.26331883  | -0.192870548 | DLEU1, DLEU7          |
| chr14 | 104355829 | 104356172 | 344  | * | 4  | 7.39975E-09 | 0.010828539 | 0.006732271 | 0.005803953 | 0.187112171  | 0.072896076  |                       |
| chr12 | 6304557   | 6304747   | 191  | * | 4  | 4.55778E-09 | 0.00354325  | 0.006736163 | 0.004157562 | 0.087375694  | 0.056996925  |                       |
| chr6  | 64515937  | 64516331  | 395  | * | 4  | 5.491E-08   | 0.017213136 | 0.006743801 | 0.010355801 | -0.211467893 | -0.075154016 | EYS                   |
| chr1  | 205782522 | 205783009 | 488  | * | 5  | 3.3402E-09  | 0.103275895 | 0.006749374 | 0.03350282  | 0.017401899  | -0.00013402  | SLC41A1               |
| chr14 | 52118241  | 52119097  | 857  | * | 7  | 4.7373E-13  | 0.02517628  | 0.006752011 | 0.006490544 | 0.027303933  | 0.001088787  | FRMD6                 |
| chr19 | 54377682  | 54377836  | 155  | * | 2  | 8.33775E-08 | 0.040509649 | 0.006755898 | 0.014552092 | -0.200577062 | -0.095165709 | MYADM                 |
| chr16 | 74775045  | 74776130  | 1086 | * | 6  | 5.3012E-11  | 0.115148022 | 0.006759789 | 0.003212684 | 0.194930607  | 0.077688422  | FA2H                  |
| chr16 | 58417718  | 58418628  | 911  | * | 6  | 3.29161E-11 | 0.023113139 | 0.006766139 | 0.002076788 | -0.213818346 | -0.029428193 | GINS3, RNU6-1110P     |
| chr22 | 50746891  | 50747878  | 988  | * | 6  | 1.07744E-14 | 0.003360659 | 0.006776549 | 0.000437563 | 0.205039594  | 0.111160685  | DENND6B               |
| chr2  | 445069    | 445430    | 362  | * | 2  | 4.0937E-09  | 0.009357692 | 0.006777047 | 0.007328341 | 0.167930389  | 0.067815905  |                       |
| chr2  | 183902764 | 183903412 | 649  | * | 8  | 2.18665E-16 | 0.013215079 | 0.006782007 | 0.001993902 | 0.04703907   | 0.006971244  | NCKAP1                |
| chr20 | 62505169  | 62505188  | 20   | * | 2  | 8.70703E-09 | 0.000360641 | 0.006782857 | 0.000712812 | -0.159294083 | -0.151835142 | TPD52L2               |
| chr11 | 8736732   | 8737458   | 727  | * | 3  | 5.86156E-09 | 0.00161796  | 0.00678532  | 0.002307312 | -0.192370237 | -0.07075232  | ST5                   |
| chr19 | 4402502   | 4403593   | 1092 | * | 8  | 6.41527E-13 | 0.060193297 | 0.006785748 | 0.009911335 | 0.025075088  | 0.011289685  | CHAF1A                |
| chr19 | 1075595   | 1077244   | 1650 | * | 7  | 7.00535E-18 | 9.8181E-08  | 0.006793136 | 5.31852E-07 | 0.218642532  | 0.054563299  | HMHA1                 |
| chr17 | 74442338  | 74443080  | 743  | * | 3  | 8.7412E-10  | 7.37862E-05 | 0.006803346 | 0.000187241 | -0.127914103 | 0.017261383  | UBE2O                 |
| chr15 | 45461444  | 45461636  | 193  | * | 2  | 1.23286E-09 | 0.000246852 | 0.006806332 | 0.000517177 | 0.110081148  | 0.104628924  | SHF                   |
| chr2  | 60983440  | 60983838  | 399  | * | 3  | 4.66823E-09 | 0.042150487 | 0.006809934 | 0.018829493 | 0.016997669  | 0.010518769  | PAPOLG                |
| chr11 | 14666247  | 14666512  | 266  | * | 3  | 2.96081E-09 | 0.013327309 | 0.006815473 | 0.00706115  | 0.02946768   | 0.012107078  | PDE3B                 |
| chr12 | 56367210  | 56368226  | 1017 | * | 17 | 6.93277E-25 | 1.93424E-05 | 0.00681566  | 1.31126E-05 | -0.098767758 | -0.02391309  | RAB5B                 |

|       |           |           |      |   |    |             |             |             |             |              |              |                                      |
|-------|-----------|-----------|------|---|----|-------------|-------------|-------------|-------------|--------------|--------------|--------------------------------------|
| chr6  | 116832940 | 116833441 | 502  | * | 2  | 7.26074E-09 | 0.000404651 | 0.006817962 | 0.000785607 | 0.156644376  | 0.132048959  | FAM26E, TRAPPC3L                     |
| chr14 | 56533845  | 56533858  | 14   | * | 2  | 3.20761E-08 | 0.001915186 | 0.006820776 | 0.002638633 | 0.116372743  | 0.073116753  |                                      |
| chr3  | 196351327 | 196352455 | 1129 | * | 6  | 3.91134E-16 | 6.1272E-05  | 0.006826731 | 9.80847E-05 | -0.208077801 | -0.09341561  |                                      |
| chr6  | 30168380  | 30168773  | 394  | * | 3  | 3.20677E-08 | 0.292076083 | 0.006836484 | 0.034822361 | -0.164444079 | -0.058087127 | TRIM26                               |
| chr4  | 6927183   | 6928241   | 1059 | * | 5  | 2.91566E-12 | 0.002290059 | 0.006844096 | 0.00149939  | -0.211216291 | -0.080333823 | TBC1D14                              |
| chr14 | 50863674  | 50865194  | 1521 | * | 12 | 2.56116E-29 | 1.46577E-06 | 0.006846576 | 5.34874E-07 | -0.193958112 | -0.082988978 | RP11-247L20.3, CDKL1                 |
| chr13 | 103053409 | 103053652 | 244  | * | 3  | 7.05272E-09 | 0.137202917 | 0.00684705  | 0.030460067 | 0.026495507  | 0.011328725  | FGF14                                |
| chr1  | 54638137  | 54638490  | 354  | * | 4  | 5.88642E-13 | 0.012490938 | 0.006849101 | 0.00103204  | -0.195422101 | -0.084063717 | RP11-446E24.4, CYB5RL                |
| chr7  | 44083518  | 44084618  | 1101 | * | 14 | 3.5326E-12  | 0.286295169 | 0.006851328 | 0.041903014 | 0.151378038  | 0.015020033  | DBNL                                 |
| chr17 | 54669616  | 54669896  | 281  | * | 2  | 1.05449E-07 | 0.004513839 | 0.006852174 | 0.004746009 | 0.024720298  | 0.002319107  |                                      |
| chr22 | 39919067  | 39919237  | 171  | * | 2  | 3.04744E-09 | 0.000357239 | 0.006854829 | 0.000708806 | 0.107822994  | 0.102931514  |                                      |
| chr17 | 26925417  | 26926868  | 1452 | * | 16 | 2.00502E-18 | 0.145564262 | 0.006861119 | 0.00602112  | 0.070001322  | 0.005830612  | SPAG5-AS1, RP11-192H23.4, SPAG5      |
| chr7  | 127033083 | 127033519 | 437  | * | 4  | 8.82581E-12 | 0.004660878 | 0.006864192 | 0.002163387 | 0.032191892  | 0.007725201  | ZNF800                               |
| chr4  | 10006885  | 10007994  | 1110 | * | 5  | 1.29609E-09 | 0.047053037 | 0.006864271 | 0.00181272  | -0.200967721 | -0.073623044 | SLC2A9                               |
| chr1  | 160833130 | 160834267 | 1138 | * | 6  | 2.31265E-14 | 0.001366971 | 0.006864351 | 0.000750147 | -0.158838474 | 0.009008662  |                                      |
| chr18 | 77821978  | 77822187  | 210  | * | 2  | 1.43567E-08 | 0.011007139 | 0.006872124 | 0.008077577 | -0.088578309 | -0.055667857 | RP11-795F19.5, RBFADN                |
| chr21 | 33895894  | 33896417  | 524  | * | 2  | 9.41446E-09 | 0.000297941 | 0.006881624 | 0.00060861  | 0.09693056   | 0.08537544   |                                      |
| chr10 | 21822787  | 21824447  | 1661 | * | 10 | 4.6067E-19  | 3.13317E-05 | 0.006882544 | 1.37537E-05 | -0.065850761 | -0.029922878 | MLLT10                               |
| chr17 | 77302056  | 77302162  | 107  | * | 2  | 7.2548E-08  | 0.003918872 | 0.006891847 | 0.004340784 | 0.166882066  | 0.14203274   | RBFOX3                               |
| chr11 | 63580553  | 63580733  | 181  | * | 5  | 1.07209E-08 | 0.031700657 | 0.006892152 | 0.019854142 | 0.018715849  | 0.007934838  |                                      |
| chr13 | 30169482  | 30170129  | 648  | * | 6  | 8.58251E-10 | 0.015021691 | 0.006893919 | 0.013884869 | 0.033190086  | 0.00398876   | SLC7A1                               |
| chr22 | 50623687  | 50624276  | 590  | * | 5  | 2.74673E-09 | 0.123789137 | 0.00690465  | 0.030163316 | 0.041493493  | 0.017912763  |                                      |
| chr11 | 236908    | 237407    | 500  | * | 6  | 9.328E-11   | 0.303054171 | 0.006910606 | 0.030698014 | 0.021726272  | 0.004398018  | PSMD13, SIRT3                        |
| chr19 | 17530035  | 17531370  | 1336 | * | 16 | 2.0618E-13  | 0.076362444 | 0.006918171 | 0.016290241 | 0.064412808  | 0.009160334  | MVB12A, CTD-2521M24.6, CTD-2521M24.8 |
| chr11 | 43941935  | 43942682  | 748  | * | 6  | 6.53857E-12 | 0.006351782 | 0.006924943 | 0.00242936  | -0.170810941 | -0.055466795 | RP11-613D13.4, ALKBH3-AS1            |
| chr1  | 155293541 | 155295093 | 1553 | * | 14 | 2.3063E-18  | 8.20602E-05 | 0.006933769 | 9.96308E-05 | -0.072590759 | -0.008115644 | RUSC1, RUSC1-AS1                     |
| chr11 | 77899047  | 77900023  | 977  | * | 11 | 1.10126E-12 | 0.252457881 | 0.006934391 | 0.035758887 | 0.043306275  | 0.007811132  | USP35, KCTD21                        |
| chr19 | 40872142  | 40872286  | 145  | * | 2  | 1.89039E-08 | 0.00303815  | 0.006936923 | 0.003670921 | -0.125593543 | -0.045547571 | PLD3                                 |
| chr4  | 129349106 | 129349141 | 36   | * | 2  | 7.8006E-08  | 0.00065846  | 0.00693723  | 0.001174485 | 0.155008822  | 0.129814008  | RP11-420A23.1                        |

|       |           |           |      |   |    |             |             |             |             |              |              |                                           |
|-------|-----------|-----------|------|---|----|-------------|-------------|-------------|-------------|--------------|--------------|-------------------------------------------|
| chr10 | 119296756 | 119296942 | 187  | * | 2  | 1.7063E-11  | 0.0025478   | 0.006939425 | 0.003251781 | -0.045056962 | -0.014851068 | EMX2OS                                    |
| chr7  | 138144067 | 138145031 | 965  | * | 6  | 9.70352E-14 | 0.001388705 | 0.006945328 | 0.001079983 | -0.13800993  | -0.043482018 |                                           |
| chr1  | 35245523  | 35247084  | 1562 | * | 11 | 1.36385E-10 | 0.004138171 | 0.006947148 | 0.001729349 | 0.10041702   | 0.030926432  | GJB3, SMIM12, RP1-34M23.5                 |
| chr2  | 75061219  | 75063068  | 1850 | * | 11 | 4.71175E-18 | 0.008672148 | 0.006948846 | 0.000910705 | -0.072579154 | -0.003283789 | HK2                                       |
| chr19 | 17445012  | 17445073  | 62   | * | 2  | 2.06068E-09 | 0.027042918 | 0.006952653 | 0.012621033 | 0.11887305   | 0.06875404   | ANO8                                      |
| chr6  | 41195891  | 41196139  | 249  | * | 2  | 6.41584E-10 | 0.000431368 | 0.006970469 | 0.000832657 | -0.238071381 | -0.223132405 | TREML4                                    |
| chr7  | 26007848  | 26008481  | 634  | * | 2  | 2.26239E-08 | 0.000293985 | 0.006974243 | 0.000603366 | 0.096950708  | 0.093494201  |                                           |
| chr6  | 90788825  | 90788857  | 33   | * | 2  | 5.54216E-09 | 0.000289918 | 0.006975158 | 0.000596267 | 0.12705596   | 0.118415618  | BACH2                                     |
| chr12 | 51664226  | 51664655  | 430  | * | 10 | 4.43457E-09 | 0.553185898 | 0.006978156 | 0.135055068 | 0.023958619  | 0.002763259  | DAZAP2, SMAGP                             |
| chr11 | 75142449  | 75142651  | 203  | * | 2  | 9.51237E-09 | 0.23892537  | 0.006978528 | 0.022404688 | 0.120686086  | 0.059926465  |                                           |
| chr3  | 15356739  | 15356881  | 143  | * | 3  | 4.59412E-11 | 7.58004E-05 | 0.006978537 | 0.000208954 | -0.269714357 | -0.187830461 | SH3BP5                                    |
| chr15 | 91140952  | 91141539  | 588  | * | 2  | 4.7051E-09  | 0.0002565   | 0.0069918   | 0.000537235 | 0.142327411  | 0.031692125  | CRTC3                                     |
| chr5  | 38403622  | 38404322  | 701  | * | 4  | 2.95327E-14 | 0.000724369 | 0.007001045 | 0.000195294 | 0.154033755  | 0.099626722  | EGFLAM                                    |
| chr11 | 62432494  | 62433815  | 1322 | * | 12 | 4.33237E-15 | 0.02817269  | 0.007001305 | 0.014661253 | 0.030457735  | 0.001136032  | METTL12, SNORA57, RP11-831H9.11, C11orf48 |
| chr20 | 36661238  | 36662003  | 766  | * | 7  | 2.05132E-10 | 0.044062666 | 0.007001886 | 0.006045646 | -0.174959796 | -0.0349548   | RPRD1B, TTI1                              |
| chr11 | 129991445 | 129992368 | 924  | * | 6  | 5.5602E-18  | 7.71177E-08 | 0.007015819 | 9.03299E-07 | 0.142496463  | 0.095712338  | APLP2                                     |
| chr11 | 117695372 | 117696822 | 1451 | * | 8  | 1.10819E-19 | 4.31349E-06 | 0.007021318 | 2.23404E-06 | -0.210921246 | -0.072824568 | FXD2, FXD6-FXD2                           |
| chr1  | 200983238 | 200983313 | 76   | * | 2  | 9.9626E-10  | 0.000261208 | 0.007024606 | 0.000546174 | -0.21375252  | -0.174229805 | KIF21B                                    |
| chr9  | 95895956  | 95896749  | 794  | * | 5  | 1.43187E-16 | 0.000471244 | 0.007026422 | 0.000149077 | -0.078382329 | -0.03446762  | NINJ1                                     |
| chr8  | 49647703  | 49648519  | 817  | * | 12 | 4.81818E-25 | 0.012083259 | 0.00702951  | 0.000598204 | -0.25233046  | -0.046941063 | EFCAB1                                    |
| chr2  | 135808369 | 135808617 | 249  | * | 4  | 2.93843E-12 | 0.000176502 | 0.007031799 | 0.000284189 | 0.198680764  | 0.12408169   |                                           |
| chr8  | 1954777   | 1955214   | 438  | * | 5  | 2.606E-17   | 3.17711E-07 | 0.00703292  | 2.90535E-06 | -0.234924039 | -0.139446022 | KBTBD11                                   |
| chr15 | 75493593  | 75494077  | 485  | * | 8  | 8.19825E-13 | 0.127259366 | 0.007041121 | 0.014330177 | -0.099903792 | -0.009005533 | C15orf39                                  |
| chr7  | 27702416  | 27704065  | 1650 | * | 14 | 2.28238E-15 | 0.014246291 | 0.007042334 | 0.000660216 | 0.214361797  | 0.010590792  | HIBADH                                    |
| chr13 | 28194657  | 28195822  | 1166 | * | 13 | 4.09101E-10 | 0.311721572 | 0.007048401 | 0.067708635 | 0.032265427  | 0.003808379  | POLR1D                                    |
| chr1  | 226889496 | 226890287 | 792  | * | 2  | 2.37736E-08 | 0.001147222 | 0.007054954 | 0.001823781 | 0.160504712  | 0.105804368  | ITPKB                                     |
| chr18 | 74207388  | 74207551  | 164  | * | 4  | 6.83238E-10 | 0.031618749 | 0.007056859 | 0.012089255 | 0.021330398  | 0.011349927  | RP11-17M16.1                              |
| chr17 | 7461260   | 7462249   | 990  | * | 13 | 3.09008E-15 | 0.076874087 | 0.00705725  | 0.005355803 | -0.100809367 | -0.02668442  | TNFSF12, TNFSF12-TNFSF13, TNFSF13         |
| chr12 | 51718559  | 51719349  | 791  | * | 4  | 4.89655E-13 | 0.175571077 | 0.007060135 | 0.008235069 | -0.263735081 | -0.103549539 |                                           |

|       |           |           |      |   |    |             |             |             |             |              |              |                       |
|-------|-----------|-----------|------|---|----|-------------|-------------|-------------|-------------|--------------|--------------|-----------------------|
| chr19 | 2549886   | 2550027   | 142  | * | 2  | 2.43548E-08 | 0.000596255 | 0.007066077 | 0.001089379 | -0.158646635 | -0.117896525 | GNG7                  |
| chr8  | 142167262 | 142167457 | 196  | * | 2  | 3.02881E-08 | 0.003711373 | 0.007072845 | 0.004234523 | 0.131196995  | 0.055189843  | DENND3                |
| chr8  | 101964947 | 101966860 | 1914 | * | 17 | 2.43006E-17 | 0.010129685 | 0.007077828 | 0.0020712   | -0.245099915 | -0.031820619 | YWHAZ                 |
| chr6  | 30302939  | 30303126  | 188  | * | 2  | 1.08732E-07 | 0.065978493 | 0.007081863 | 0.017692585 | -0.278224289 | -0.147647062 | TRIM39, TRIM39-RPP21  |
| chr2  | 174829142 | 174830453 | 1312 | * | 7  | 8.12177E-17 | 0.010388898 | 0.007082187 | 0.000782059 | -0.144467435 | -0.015388626 | SP3                   |
| chr8  | 103249036 | 103249853 | 818  | * | 3  | 7.27186E-12 | 4.03961E-05 | 0.007091572 | 0.000129689 | -0.253073026 | -0.160730197 | RRM2B                 |
| chr6  | 6724955   | 6725495   | 541  | * | 4  | 5.69444E-10 | 0.026410376 | 0.00710201  | 0.014059843 | -0.281662907 | -0.078395284 |                       |
| chr17 | 8056492   | 8057058   | 567  | * | 5  | 6.55435E-12 | 0.045125899 | 0.007103485 | 0.00253485  | -0.109954641 | -0.040043973 | PER1, RP11-599B13.6   |
| chr10 | 22828670  | 22829118  | 449  | * | 4  | 1.03138E-13 | 0.002820534 | 0.007109899 | 0.000163379 | 0.148079151  | 0.097631363  | PIP4K2A               |
| chr10 | 99478572  | 99478719  | 148  | * | 2  | 6.6423E-08  | 0.025975788 | 0.007109918 | 0.012579298 | -0.086720717 | -0.057284292 |                       |
| chr6  | 32099450  | 32099564  | 115  | * | 2  | 2.38294E-10 | 0.000286095 | 0.007111496 | 0.000591828 | 0.173404969  | 0.146371651  |                       |
| chr10 | 120354627 | 120355756 | 1130 | * | 10 | 8.84013E-13 | 0.417880075 | 0.007122068 | 0.021216849 | 0.096429102  | 0.038444809  | PRLHR                 |
| chr8  | 134073176 | 134073884 | 709  | * | 4  | 4.53387E-12 | 0.000528193 | 0.007123472 | 0.001037511 | 0.164683151  | 0.065290004  | TG, SLA               |
| chr11 | 1299151   | 1299791   | 641  | * | 5  | 9.60123E-09 | 0.07139688  | 0.007133402 | 0.030192675 | 0.109115094  | 0.041880273  | TOLLIP                |
| chr9  | 119311603 | 119311706 | 104  | * | 2  | 9.08663E-08 | 0.001606384 | 0.00713674  | 0.002358244 | -0.267065005 | -0.206667925 | RP11-264C15.2, ASTN2  |
| chr4  | 2812455   | 2812744   | 290  | * | 2  | 1.23967E-07 | 0.087583786 | 0.007142042 | 0.019242351 | -0.065868874 | -0.042167595 | SH3BP2                |
| chr8  | 22446484  | 22446737  | 254  | * | 2  | 5.99248E-09 | 0.001830056 | 0.007150749 | 0.002596902 | 0.193819526  | 0.139115231  | PDLIM2                |
| chr15 | 41101870  | 41102374  | 505  | * | 3  | 6.00062E-10 | 0.011197364 | 0.007164992 | 0.001823483 | 0.156394577  | 0.090462861  | ZFYVE19               |
| chr10 | 134539818 | 134540383 | 566  | * | 5  | 1.84049E-12 | 0.15549458  | 0.007167185 | 0.006217307 | 0.14192441   | 0.059903487  | INPP5A                |
| chr18 | 72165429  | 72166704  | 1276 | * | 6  | 1.43707E-14 | 0.006230279 | 0.007171922 | 0.001163413 | -0.10954825  | -0.051568474 | CNDP2                 |
| chr17 | 32266     | 32503     | 238  | * | 4  | 1.45511E-12 | 0.000174553 | 0.007176738 | 0.00037829  | -0.23557375  | -0.144175559 |                       |
| chr3  | 171024571 | 171024841 | 271  | * | 3  | 5.41094E-10 | 0.001350703 | 0.007183864 | 0.001198286 | 0.151854595  | 0.070755345  | TNIK                  |
| chr15 | 97037828  | 97038051  | 224  | * | 2  | 3.11506E-08 | 0.000714809 | 0.00718569  | 0.001266206 | -0.113224553 | -0.07252282  |                       |
| chr6  | 90025136  | 90026078  | 943  | * | 6  | 1.79874E-13 | 0.000382709 | 0.007188812 | 0.000158    | 0.105177124  | 0.035232583  |                       |
| chr14 | 77783299  | 77783447  | 149  | * | 2  | 7.06334E-09 | 0.000322533 | 0.00718886  | 0.000656829 | -0.138105771 | -0.121707355 | POMT2                 |
| chr3  | 176919547 | 176919713 | 167  | * | 3  | 1.94784E-11 | 5.40904E-05 | 0.00719428  | 0.000157467 | -0.20291075  | -0.17842263  |                       |
| chr12 | 124903636 | 124903668 | 33   | * | 2  | 5.3685E-09  | 0.001152902 | 0.007199023 | 0.001842277 | 0.134818599  | 0.093976598  | NCOR2                 |
| chr1  | 179923514 | 179924316 | 803  | * | 11 | 3.25853E-10 | 0.2484846   | 0.007199178 | 0.090582318 | 0.029656867  | 0.004072614  | CEP350, RP11-533E19.5 |
| chr19 | 18698825  | 18699234  | 410  | * | 5  | 5.42394E-10 | 0.022446565 | 0.007200384 | 0.010225677 | -0.17246279  | -0.085481501 | CRLF1                 |

|       |           |           |      |   |    |             |             |             |             |              |              |                       |
|-------|-----------|-----------|------|---|----|-------------|-------------|-------------|-------------|--------------|--------------|-----------------------|
| chr11 | 57252275  | 57252371  | 97   | * | 2  | 3.60173E-08 | 0.003649834 | 0.007200397 | 0.00421949  | -0.23781534  | -0.153607076 | SLC43A1               |
| chr1  | 160160587 | 160160766 | 180  | * | 4  | 8.51876E-09 | 0.221661471 | 0.007219093 | 0.013159273 | 0.166568727  | 0.062365805  | CASQ1                 |
| chr2  | 179149472 | 179149605 | 134  | * | 3  | 1.82766E-11 | 6.41551E-05 | 0.007222627 | 0.000202475 | 0.138648531  | 0.129662543  | OSBPL6                |
| chr12 | 113013215 | 113013494 | 280  | * | 4  | 9.4769E-08  | 0.005367735 | 0.007226365 | 0.005918033 | 0.120425272  | 0.06215293   | RPH3A                 |
| chr2  | 39453847  | 39453876  | 30   | * | 2  | 4.25536E-08 | 0.000767465 | 0.007229291 | 0.001342283 | 0.141148412  | 0.105362398  | CDKL4                 |
| chr6  | 30002671  | 30002763  | 93   | * | 3  | 1.74897E-10 | 0.000212854 | 0.007232889 | 0.000533881 | -0.17943513  | -0.129307545 | ZNRD1-AS1             |
| chr6  | 30127760  | 30129346  | 1587 | * | 12 | 3.88377E-24 | 5.44756E-05 | 0.007242104 | 4.18309E-06 | 0.209437371  | 0.079490127  | TRIM10                |
| chr15 | 52643585  | 52643727  | 143  | * | 2  | 6.20571E-08 | 0.001607673 | 0.007243781 | 0.002371696 | -0.111291767 | -0.085494781 | MYO5A                 |
| chr17 | 25798180  | 25799447  | 1268 | * | 11 | 9.79117E-22 | 2.48979E-05 | 0.00724452  | 1.73071E-05 | 0.124955686  | 0.054279719  | KSR1                  |
| chr9  | 140135453 | 140136534 | 1082 | * | 8  | 7.33386E-14 | 0.000802761 | 0.007244626 | 0.000138848 | 0.066104372  | 0.017056338  | TUBB4B                |
| chr16 | 2984407   | 2984768   | 362  | * | 5  | 4.78547E-09 | 0.267004077 | 0.007256554 | 0.019140506 | -0.214586357 | -0.064878825 | FLYWCH1               |
| chr6  | 41123086  | 41123396  | 311  | * | 3  | 1.09545E-08 | 0.009833996 | 0.007264595 | 0.00834087  | 0.09648392   | 0.083914707  |                       |
| chr19 | 2256468   | 2257204   | 737  | * | 7  | 9.87462E-19 | 0.001124471 | 0.007267734 | 0.000136187 | 0.123661528  | 0.065288938  | JSRP1                 |
| chr9  | 132388503 | 132389032 | 530  | * | 3  | 3.97914E-10 | 0.168851982 | 0.007281509 | 0.012309129 | 0.030138044  | 0.011785671  | NTMT1                 |
| chr19 | 10928172  | 10928696  | 525  | * | 9  | 8.63264E-21 | 2.99305E-05 | 0.007282256 | 2.16503E-05 | 0.126021112  | 0.065644873  | DNM2, MIR199A1        |
| chr1  | 161052851 | 161054092 | 1242 | * | 5  | 2.2523E-12  | 0.001256549 | 0.007283632 | 0.001776401 | -0.206533711 | -0.044231301 | PVRL4                 |
| chr10 | 96122379  | 96122890  | 512  | * | 5  | 2.15824E-09 | 0.185659395 | 0.007285143 | 0.010997028 | 0.038991821  | 0.009458421  | NOC3L                 |
| chr3  | 58523313  | 58523649  | 337  | * | 4  | 4.00313E-10 | 0.005647789 | 0.007286249 | 0.003027112 | -0.236610575 | -0.098919174 |                       |
| chr1  | 29572478  | 29572561  | 84   | * | 2  | 1.49642E-07 | 0.017091574 | 0.007303925 | 0.010513795 | -0.081038746 | -0.060088549 | PTPRU                 |
| chr3  | 18786729  | 18787223  | 495  | * | 3  | 3.77781E-10 | 0.000364093 | 0.007305391 | 0.000799636 | -0.235935818 | -0.132678496 | AC144521.1            |
| chr6  | 34359501  | 34361621  | 2121 | * | 11 | 1.37743E-14 | 0.003677519 | 0.007314255 | 0.000195568 | -0.261102531 | -0.020097243 | NUDT3, RPS10-NUDT3    |
| chr11 | 1942404   | 1943014   | 611  | * | 7  | 4.95374E-21 | 0.000303523 | 0.007316826 | 5.90047E-05 | 0.144498416  | 0.07368419   | TNNT3                 |
| chr10 | 129099107 | 129099456 | 350  | * | 3  | 8.68808E-09 | 0.004720729 | 0.007324171 | 0.003105332 | 0.157046788  | 0.064182822  | DOCK1                 |
| chr5  | 139138880 | 139139201 | 322  | * | 3  | 1.29456E-11 | 4.02357E-05 | 0.007336622 | 0.000133704 | -0.240194727 | -0.207141625 |                       |
| chr8  | 29211863  | 29211949  | 87   | * | 2  | 5.61569E-10 | 0.00047062  | 0.007344506 | 0.000905868 | -0.213478403 | -0.164836855 |                       |
| chr10 | 134310836 | 134311114 | 279  | * | 3  | 9.33361E-09 | 0.073822884 | 0.007347474 | 0.003591023 | -0.118896522 | -0.065725633 |                       |
| chr13 | 30982826  | 30982971  | 146  | * | 2  | 1.18443E-08 | 0.000810661 | 0.007347752 | 0.001408263 | -0.20932188  | -0.0966077   |                       |
| chr14 | 24778911  | 24779959  | 1049 | * | 6  | 5.73324E-16 | 0.000265512 | 0.007348043 | 0.000349219 | -0.130404765 | -0.048670777 | LTB4R2, LTB4R2, CIDEA |
| chr20 | 30168680  | 30168797  | 118  | * | 3  | 1.21921E-07 | 0.014496752 | 0.007354303 | 0.010370536 | -0.134319481 | -0.063354647 |                       |

|       |           |           |      |   |    |             |             |             |             |              |              |                     |
|-------|-----------|-----------|------|---|----|-------------|-------------|-------------|-------------|--------------|--------------|---------------------|
| chr19 | 36100919  | 36101191  | 273  | * | 2  | 1.34814E-08 | 0.005361019 | 0.007354651 | 0.005468774 | -0.122999041 | -0.041685094 | AC002115.9          |
| chr1  | 1549615   | 1550648   | 1034 | * | 7  | 8.03494E-18 | 0.000617895 | 0.007358275 | 0.000138591 | -0.180105005 | -0.052723173 | RP11-345P4.9        |
| chr1  | 7238945   | 7238998   | 54   | * | 2  | 2.85034E-08 | 0.000887898 | 0.007362004 | 0.001514089 | 0.185987469  | 0.143126814  | CAMTA1              |
| chr1  | 109102050 | 109103095 | 1046 | * | 6  | 9.5715E-14  | 7.75684E-05 | 0.007362618 | 6.54391E-05 | 0.180705326  | 0.03193681   | FAM102B             |
| chr19 | 13209470  | 13211261  | 1792 | * | 8  | 9.39221E-14 | 2.4663E-05  | 0.007369757 | 4.02915E-05 | -0.07189493  | -0.029645579 | NFIX, LYL1          |
| chr12 | 53607916  | 53608405  | 490  | * | 3  | 1.9159E-10  | 0.000596965 | 0.007370154 | 0.00096455  | 0.145992029  | 0.087185096  | RARG                |
| chr5  | 159625135 | 159626172 | 1038 | * | 8  | 1.37303E-14 | 0.002483973 | 0.007377769 | 0.001318931 | 0.150125736  | 0.06190793   | FABP6, CTB-127C13.1 |
| chr13 | 52585283  | 52586563  | 1281 | * | 17 | 1.92702E-14 | 0.023051345 | 0.007379474 | 0.007563786 | 0.055408471  | 0.009907659  | ALG11, ATP7B        |
| chr7  | 150728263 | 150728338 | 76   | * | 2  | 3.91149E-08 | 0.002819127 | 0.007379903 | 0.003574359 | -0.132674771 | -0.111651443 | ABCB8               |
| chr19 | 47248003  | 47249219  | 1217 | * | 8  | 1.93844E-14 | 0.000840265 | 0.007384412 | 0.000565387 | 0.12980369   | 0.000529356  | STRN4               |
| chr17 | 75368902  | 75370611  | 1710 | * | 14 | 1.76489E-18 | 0.003008781 | 0.007384698 | 0.001723538 | 0.062609791  | 0.00973616   | SEPT9, RP11-936I5.1 |
| chr7  | 631862    | 633202    | 1341 | * | 7  | 1.80719E-12 | 0.001143793 | 0.007386269 | 0.000432555 | 0.160609017  | 0.071309357  | PRKAR1B             |
| chr5  | 137774392 | 137774585 | 194  | * | 5  | 2.67423E-08 | 0.009018941 | 0.007389542 | 0.009587742 | 0.193766727  | 0.046424264  |                     |
| chr22 | 46373530  | 46373951  | 422  | * | 3  | 5.57106E-10 | 0.073936776 | 0.007393929 | 0.013887916 | 0.061505356  | 0.041384881  |                     |
| chr19 | 8565406   | 8565520   | 115  | * | 3  | 3.98585E-10 | 0.002834246 | 0.007394808 | 0.002973962 | -0.171315402 | -0.087566977 | PRAM1               |
| chr11 | 12136405  | 12136467  | 63   | * | 2  | 7.99283E-09 | 0.000329472 | 0.00739588  | 0.000672694 | 0.153386195  | 0.15268535   | MICAL2              |
| chr16 | 4987201   | 4987927   | 727  | * | 10 | 3.29341E-11 | 0.531641222 | 0.007397048 | 0.10460225  | -0.088961082 | -0.011008283 | PPL                 |
| chr20 | 55017557  | 55017932  | 376  | * | 2  | 1.4886E-08  | 0.000997476 | 0.007408123 | 0.001661585 | -0.081583184 | -0.074701535 | CASS4               |
| chr6  | 108572926 | 108573461 | 536  | * | 4  | 1.71444E-13 | 5.30575E-05 | 0.007423394 | 0.000149762 | 0.155246359  | 0.103955653  | RP1-128O3.5, SNX3   |
| chr14 | 24455908  | 24456378  | 471  | * | 2  | 1.70414E-09 | 0.000786558 | 0.007428187 | 0.001379012 | -0.163124318 | -0.150120594 | DHRS4L2, DHRS4-AS1  |
| chr8  | 73998208  | 73998859  | 652  | * | 3  | 8.4445E-09  | 0.01023616  | 0.007428376 | 0.001717367 | 0.130371905  | 0.082854898  | SBSPON              |
| chr11 | 113846918 | 113847135 | 218  | * | 5  | 4.84409E-14 | 0.021181105 | 0.007429962 | 0.000626632 | -0.284701023 | -0.103988937 | HTR3A               |
| chr5  | 138941366 | 138941688 | 323  | * | 5  | 8.34341E-10 | 0.028700511 | 0.007445454 | 0.016268869 | 0.020266471  | 0.006581797  | UBE2D2              |
| chr9  | 6779450   | 6779489   | 40   | * | 2  | 7.49546E-09 | 0.000474116 | 0.007448946 | 0.000914425 | -0.185495328 | -0.185028741 | KDM4C               |
| chr8  | 11415543  | 11416365  | 823  | * | 5  | 1.01878E-10 | 0.008157305 | 0.007456857 | 0.000766952 | -0.100648323 | -0.03179101  | BLK, RP11-148O21.2  |
| chr11 | 64127791  | 64128339  | 549  | * | 3  | 1.67202E-11 | 7.17279E-05 | 0.007457897 | 0.000223353 | -0.152161326 | -0.104051975 | RPS6KA4             |
| chr3  | 49823664  | 49824475  | 812  | * | 17 | 5.6952E-11  | 0.759291544 | 0.007459032 | 0.203113764 | -0.048376161 | -0.001935612 | IP6K1               |
| chr9  | 124587471 | 124587820 | 350  | * | 3  | 2.59282E-10 | 0.00302189  | 0.007460573 | 0.001245478 | 0.117418849  | 0.08165902   | TTLL11              |
| chr1  | 228890820 | 228891306 | 487  | * | 4  | 2.16843E-09 | 0.002003417 | 0.007463806 | 0.002815279 | -0.188396541 | -0.112845883 |                     |

|       |           |           |      |   |    |             |             |             |             |              |              |                                        |
|-------|-----------|-----------|------|---|----|-------------|-------------|-------------|-------------|--------------|--------------|----------------------------------------|
| chr1  | 70820512  | 70820798  | 287  | * | 10 | 3.61685E-11 | 0.416495803 | 0.007469401 | 0.172158925 | 0.042217613  | 0.003167011  | HHLA3                                  |
| chr1  | 225997649 | 225998232 | 584  | * | 4  | 7.26722E-11 | 0.019529804 | 0.007478493 | 0.002653871 | 0.02603481   | 0.001103377  | EPHX1                                  |
| chr14 | 21571844  | 21572766  | 923  | * | 6  | 3.30426E-09 | 0.066136581 | 0.007479626 | 0.016364833 | 0.017415414  | 0.003188592  | TMEM253, ZNF219                        |
| chr16 | 81591788  | 81591792  | 5    | * | 2  | 4.98073E-10 | 0.000352135 | 0.007482127 | 0.000713422 | 0.075032901  | 0.068694491  | CMIP                                   |
| chr17 | 7482456   | 7483518   | 1063 | * | 6  | 1.62037E-11 | 0.012418365 | 0.007485391 | 0.004362602 | -0.069660329 | -0.021164942 | SNORA67, CD68                          |
| chr6  | 167506553 | 167508537 | 1985 | * | 12 | 3.7227E-12  | 0.004876317 | 0.007497721 | 0.000241074 | -0.119379695 | -0.01079865  | RP11-517H2.6                           |
| chr8  | 142182536 | 142183860 | 1325 | * | 8  | 1.6055E-12  | 0.000236513 | 0.007498424 | 0.00013956  | 0.18753737   | -0.027930737 | DENND3                                 |
| chr3  | 71631744  | 71632188  | 445  | * | 3  | 9.4387E-11  | 0.098487653 | 0.007508432 | 0.004249171 | 0.019563014  | 0.008978135  | FOXP1                                  |
| chr1  | 26857284  | 26857774  | 491  | * | 4  | 1.0947E-11  | 0.001936864 | 0.007521761 | 0.000920308 | -0.174470047 | -0.086916229 | RPS6KA1                                |
| chr17 | 40306700  | 40307717  | 1018 | * | 11 | 1.47537E-22 | 2.06781E-05 | 0.007525145 | 1.15623E-05 | 0.081946004  | 0.002174269  | RP11-358B23.1, CTD-2132N18.3,<br>RAB5C |
| chr6  | 31645677  | 31646377  | 701  | * | 6  | 7.37928E-12 | 0.026659093 | 0.007534282 | 0.005399249 | 0.134513549  | 0.053681707  | LY6G5C                                 |
| chr5  | 179779115 | 179779664 | 550  | * | 4  | 1.7332E-10  | 0.017269964 | 0.007534594 | 0.003870378 | 0.097550252  | 0.055740304  | GFPT2                                  |
| chr13 | 113706662 | 113707929 | 1268 | * | 8  | 3.50491E-15 | 0.001842995 | 0.007537678 | 0.000660132 | 0.157675631  | 0.058022425  | MCF2L                                  |
| chr17 | 7123415   | 7123994   | 580  | * | 8  | 1.12774E-08 | 0.139267268 | 0.007556958 | 0.073673229 | 0.024064841  | 0.007241268  | ACADVL                                 |
| chr7  | 2149259   | 2151788   | 2530 | * | 12 | 4.388E-18   | 6.18168E-05 | 0.007558643 | 1.00161E-05 | 0.171453706  | 0.076775043  | MAD1L1                                 |
| chr3  | 4793370   | 4794082   | 713  | * | 5  | 3.46927E-13 | 1.57875E-05 | 0.007562904 | 7.70698E-05 | -0.060788318 | -0.045042282 | ITPR1                                  |
| chr16 | 622502    | 622992    | 491  | * | 4  | 6.62874E-11 | 0.019508763 | 0.007571875 | 0.002455371 | 0.128955327  | 0.058784919  | PIGQ                                   |
| chr12 | 48213040  | 48214620  | 1581 | * | 11 | 1.60209E-18 | 1.85213E-06 | 0.007572514 | 2.95252E-06 | -0.209805533 | -0.03554432  | HDAC7                                  |
| chr12 | 51403056  | 51403474  | 419  | * | 5  | 3.16103E-15 | 0.000161108 | 0.007579782 | 8.43961E-05 | -0.13729908  | -0.08124062  | SLC11A2                                |
| chr19 | 43099795  | 43099845  | 51   | * | 2  | 1.10369E-07 | 0.001428097 | 0.007580691 | 0.002203816 | -0.192044706 | -0.15448252  | LIPE-AS1                               |
| chr2  | 242641476 | 242641489 | 14   | * | 2  | 1.5295E-07  | 0.026884724 | 0.007580826 | 0.013295313 | 0.034304506  | 0.015038056  | ING5                                   |
| chr17 | 5137892   | 5138696   | 805  | * | 8  | 3.65373E-15 | 0.032845367 | 0.007582003 | 0.00034612  | -0.143568315 | -0.051592317 | RP11-333E1.1, SCIMP                    |
| chr18 | 77441381  | 77441810  | 430  | * | 3  | 5.6105E-10  | 0.112120541 | 0.007591171 | 0.028754459 | -0.174904167 | -0.07119787  | CTDP1                                  |
| chr11 | 12108103  | 12108286  | 184  | * | 3  | 1.00463E-08 | 0.002239354 | 0.007592323 | 0.003175957 | 0.199846199  | 0.130831079  |                                        |
| chr16 | 66865015  | 66865112  | 98   | * | 4  | 1.60807E-07 | 0.120933797 | 0.007592502 | 0.021866475 | 0.032247144  | -0.003293227 | NAE1                                   |
| chr19 | 17211623  | 17211772  | 150  | * | 2  | 7.05279E-11 | 0.000421885 | 0.007600309 | 0.000833453 | 0.1652178    | 0.151960906  | MYO9B                                  |
| chr5  | 177036766 | 177037104 | 339  | * | 3  | 3.06766E-11 | 0.000226432 | 0.00762233  | 0.000484722 | -0.21094186  | -0.150340472 | B4GALT7                                |
| chr11 | 64878218  | 64878267  | 50   | * | 2  | 1.56988E-08 | 0.057169971 | 0.007623649 | 0.01783427  | -0.116352455 | -0.051906196 | VPS51, AP003068.9                      |
| chr3  | 11732893  | 11733395  | 503  | * | 3  | 6.88437E-10 | 0.001365668 | 0.007628646 | 0.001389674 | 0.135048857  | 0.088604638  | VGLL4                                  |



|       |           |           |      |   |    |             |             |             |             |              |              |                               |
|-------|-----------|-----------|------|---|----|-------------|-------------|-------------|-------------|--------------|--------------|-------------------------------|
| chr10 | 99343311  | 99344164  | 854  | * | 7  | 2.83729E-14 | 0.004755667 | 0.007632199 | 0.001985887 | 0.167661547  | 0.044544376  | ANKRD2, HOGA1, PI4K2A, PI4K2A |
| chr7  | 23387365  | 23387862  | 498  | * | 5  | 1.9089E-11  | 0.000615124 | 0.007639311 | 0.000879569 | -0.149608242 | -0.036447925 | IGF2BP3                       |
| chr8  | 146024438 | 146024786 | 349  | * | 4  | 7.51825E-10 | 0.006588096 | 0.007639345 | 0.004685776 | 0.024680301  | 0.00527378   | ZNF517                        |
| chr2  | 239988967 | 239989132 | 166  | * | 2  | 1.56168E-08 | 0.001024664 | 0.007644395 | 0.001712539 | 0.126070174  | 0.113646803  | HDAC4                         |
| chr16 | 57643645  | 57644411  | 767  | * | 4  | 9.69094E-12 | 0.005078178 | 0.007657182 | 0.001011637 | 0.175842174  | 0.109817983  |                               |
| chr19 | 35760554  | 35760861  | 308  | * | 3  | 7.28623E-09 | 0.003489382 | 0.007659133 | 0.004170422 | 0.049532679  | 0.030404288  | USF2                          |
| chr8  | 142161840 | 142161988 | 149  | * | 2  | 4.3439E-09  | 0.014372486 | 0.007671924 | 0.009897679 | -0.213015602 | -0.115791517 | DENND3                        |
| chr12 | 45685719  | 45686426  | 708  | * | 5  | 4.37878E-11 | 0.053337875 | 0.007672218 | 0.004833519 | 0.205085673  | 0.064787718  | ANO6                          |
| chr6  | 116707933 | 116708668 | 736  | * | 3  | 3.04141E-10 | 0.000138804 | 0.007674133 | 0.000381524 | -0.15551604  | -0.043117835 | DSE                           |
| chr9  | 71819562  | 71820047  | 486  | * | 5  | 8.50519E-19 | 3.29228E-07 | 0.007688172 | 2.96095E-06 | 0.167357811  | 0.124112711  | TJP2                          |
| chr5  | 88120826  | 88121200  | 375  | * | 2  | 4.2107E-08  | 0.002044792 | 0.007689629 | 0.002889149 | -0.1435702   | -0.091300721 | MEF2C                         |
| chr16 | 15149275  | 15149995  | 721  | * | 3  | 1.1764E-10  | 0.014762003 | 0.007691983 | 0.009473536 | 0.025856263  | 0.008866645  | PDXDC1, NTAN1                 |
| chr17 | 48201129  | 48201233  | 105  | * | 2  | 2.00572E-08 | 0.001424289 | 0.007699245 | 0.002210458 | 0.141580827  | 0.105021178  | SAMD14                        |
| chr16 | 54085289  | 54085398  | 110  | * | 2  | 2.34004E-08 | 0.000758945 | 0.007702468 | 0.00135337  | -0.159726581 | -0.106116837 | FTO, RP11-357N13.1            |
| chr19 | 47839132  | 47840131  | 1000 | * | 4  | 7.23566E-09 | 7.06117E-05 | 0.007702806 | 0.000167611 | -0.170703593 | -0.046652941 | C5AR2                         |
| chr16 | 30584674  | 30584961  | 288  | * | 3  | 1.04859E-08 | 0.184233815 | 0.00770956  | 0.016160438 | 0.15570699   | 0.061541564  | AC002310.7                    |
| chr14 | 69424756  | 69425084  | 329  | * | 2  | 7.80417E-09 | 0.000594255 | 0.007717649 | 0.001110677 | 0.109471825  | 0.092812368  | ACTN1                         |
| chr10 | 72200612  | 72201741  | 1130 | * | 13 | 5.35039E-14 | 0.031671933 | 0.007728773 | 0.016801789 | 0.076029477  | 0.032438919  | NODAL                         |
| chr11 | 67219241  | 67220318  | 1078 | * | 11 | 7.08024E-13 | 0.05464961  | 0.007738229 | 0.016737485 | 0.181511927  | 0.046656812  | CABP4, GPR152                 |
| chr4  | 1319719   | 1320674   | 956  | * | 5  | 1.54747E-14 | 0.003008285 | 0.007741667 | 0.000661147 | 0.1415601    | 0.071400345  | MAEA                          |
| chr4  | 8291937   | 8292801   | 865  | * | 4  | 1.86003E-09 | 0.014840248 | 0.007743478 | 0.004392311 | -0.218052008 | -0.068899584 | HTRA3                         |
| chr5  | 149466066 | 149466715 | 650  | * | 7  | 5.16027E-20 | 0.000101456 | 0.007743839 | 3.37909E-05 | -0.179449554 | -0.075773908 | CSF1R                         |
| chr14 | 69281297  | 69282256  | 960  | * | 3  | 1.02551E-11 | 5.36264E-05 | 0.007745039 | 0.000167183 | 0.090499494  | 0.084028872  |                               |
| chr20 | 3693158   | 3693221   | 64   | * | 3  | 3.54573E-10 | 0.00024274  | 0.007749802 | 0.000605288 | -0.162546755 | -0.106379722 |                               |
| chr21 | 45575559  | 45575832  | 274  | * | 3  | 6.6135E-09  | 0.001553842 | 0.00775257  | 0.002174257 | 0.10938214   | 0.075755514  |                               |
| chr2  | 106761185 | 106761805 | 621  | * | 4  | 1.98229E-12 | 0.00029359  | 0.007756478 | 0.000670466 | 0.102384205  | 0.081678644  | UXS1                          |
| chr16 | 85146088  | 85146768  | 681  | * | 6  | 4.2481E-14  | 0.001233848 | 0.007767254 | 0.000430862 | 0.090009024  | 0.048027205  | FAM92B                        |
| chr2  | 64370690  | 64371680  | 991  | * | 9  | 1.15553E-11 | 0.09421836  | 0.007777738 | 0.028327381 | 0.026667197  | 0.001230728  | AC074289.1, PELI1             |
| chr15 | 50412191  | 50412411  | 221  | * | 3  | 2.47718E-09 | 0.001007354 | 0.00778122  | 0.001793339 | -0.149556124 | -0.128796391 | ATP8B4                        |

|       |           |           |      |   |    |             |             |             |             |              |              |                            |
|-------|-----------|-----------|------|---|----|-------------|-------------|-------------|-------------|--------------|--------------|----------------------------|
| chr2  | 43446987  | 43447375  | 389  | * | 3  | 1.65436E-08 | 0.005342772 | 0.007792717 | 0.003156683 | -0.043177972 | -0.011764595 | THADA                      |
| chr15 | 43512998  | 43513563  | 566  | * | 5  | 1.86556E-09 | 0.00904579  | 0.007794129 | 0.006060589 | 0.149540322  | 0.072554854  | EPB42                      |
| chr6  | 108280315 | 108280406 | 92   | * | 2  | 1.37571E-09 | 0.020629113 | 0.007795406 | 0.011975132 | 0.143624811  | 0.051745005  | RP1-191J18.66              |
| chr7  | 128049980 | 128050616 | 637  | * | 9  | 9.97674E-12 | 0.533165557 | 0.007797844 | 0.041108292 | 0.031620917  | 0.00653421   | IMPDH1                     |
| chr7  | 32931884  | 32932444  | 561  | * | 6  | 5.65577E-10 | 0.008160906 | 0.007798372 | 0.006822706 | -0.038728523 | -0.002181877 | AVL9, KBTBD2               |
| chr7  | 99036293  | 99037189  | 897  | * | 14 | 5.92367E-15 | 0.081435751 | 0.00779895  | 0.009088692 | 0.047684973  | 0.004329053  | CPSF4, PTCO1, ATP5J2-PTCO1 |
| chr19 | 4638933   | 4640159   | 1227 | * | 16 | 3.13912E-15 | 0.007757173 | 0.007802961 | 0.005763428 | -0.054774682 | 0.001462807  | TNFAIP8L1                  |
| chr2  | 97171002  | 97171449  | 448  | * | 5  | 4.98375E-10 | 0.002776791 | 0.00780762  | 0.002848814 | 0.165474909  | 0.064719124  | NEURL3                     |
| chr14 | 64009472  | 64010574  | 1103 | * | 12 | 6.28489E-18 | 0.004718765 | 0.007810213 | 0.001827788 | 0.040568366  | 0.004294421  | CTD-2302E22.4, PPP2R5E     |
| chr2  | 169652805 | 169653384 | 580  | * | 4  | 8.86491E-13 | 0.006604113 | 0.007817472 | 0.000366205 | 0.182700891  | 0.122812687  | NOSTRIN                    |
| chr19 | 49843565  | 49843922  | 358  | * | 4  | 6.50072E-09 | 0.006126233 | 0.007821746 | 0.004967932 | 0.130079624  | 0.086150732  | CD37, CTC-30107.4, TEAD2   |
| chr6  | 86353447  | 86354018  | 572  | * | 5  | 3.53036E-09 | 0.027884171 | 0.007824879 | 0.01286065  | -0.039082981 | -0.011542321 | SYNCRIP                    |
| chr3  | 42699933  | 42701042  | 1110 | * | 11 | 6.48646E-24 | 7.20593E-05 | 0.007831689 | 3.96278E-05 | -0.265016717 | -0.063848319 | ZBTB47                     |
| chr1  | 28201862  | 28202173  | 312  | * | 3  | 4.85132E-09 | 0.007119875 | 0.007832551 | 0.001979514 | -0.228265177 | -0.108481392 | THEMIS2                    |
| chr20 | 8638302   | 8639258   | 957  | * | 5  | 2.95454E-12 | 0.002004111 | 0.007836381 | 0.001348203 | -0.340617601 | -0.122395699 | PLCB1                      |
| chr1  | 45805948  | 45807214  | 1267 | * | 12 | 3.67473E-17 | 0.046099988 | 0.007836468 | 0.008040792 | -0.199476717 | -0.014478334 | TOE1, MUTYH                |
| chr9  | 134619599 | 134619980 | 382  | * | 2  | 2.20343E-09 | 0.000347677 | 0.007836666 | 0.000712467 | 0.170103042  | 0.003057246  |                            |
| chr1  | 3425603   | 3425761   | 159  | * | 2  | 1.75583E-07 | 0.009699413 | 0.007839074 | 0.008068001 | -0.116265971 | -0.082527565 | MEGF6                      |
| chr11 | 116740987 | 116741639 | 653  | * | 3  | 1.96506E-11 | 0.00044226  | 0.007851866 | 0.00072135  | -0.199497026 | -0.133484213 | SIK3                       |
| chr18 | 3066514   | 3067624   | 1111 | * | 6  | 7.1116E-12  | 0.012315286 | 0.007855128 | 0.001904739 | -0.259003765 | -0.004754494 | MYOM1                      |
| chr21 | 33670510  | 33672713  | 2204 | * | 7  | 4.93006E-13 | 0.001410015 | 0.007858673 | 0.000222232 | 0.182145152  | 0.053514292  | MRAP                       |
| chr2  | 28974102  | 28974942  | 841  | * | 9  | 8.89147E-13 | 0.001166373 | 0.00786099  | 0.001442089 | 0.027598623  | -0.004687435 | PPP1CB                     |
| chr13 | 114880761 | 114880889 | 129  | * | 2  | 4.33832E-08 | 0.059539302 | 0.007861766 | 0.01846776  | 0.166713804  | 0.071125256  | RASA3                      |
| chr19 | 13946770  | 13947914  | 1145 | * | 11 | 6.20405E-18 | 0.00466659  | 0.007870319 | 0.000199514 | -0.179445624 | -0.049294278 | MIR24-2, MIR27A, MIR23A    |
| chr6  | 4889428   | 4890656   | 1229 | * | 9  | 6.9247E-19  | 0.000153372 | 0.007876068 | 0.000153538 | -0.166462574 | -0.069534296 | CDYL                       |
| chr1  | 12508973  | 12509707  | 735  | * | 4  | 2.35259E-15 | 1.17635E-06 | 0.007881174 | 8.47031E-06 | 0.202574411  | 0.15778676   | VPS13D                     |
| chr8  | 17980057  | 17980148  | 92   | * | 2  | 9.70577E-08 | 0.005813518 | 0.00788901  | 0.005944462 | 0.172483733  | 0.102184916  |                            |
| chr4  | 71704501  | 71705074  | 574  | * | 7  | 1.74076E-08 | 0.753043242 | 0.007891901 | 0.228671892 | -0.068381496 | -0.013769102 | GRSF1                      |
| chr9  | 116341874 | 116342094 | 221  | * | 3  | 2.557E-09   | 0.002427898 | 0.00789856  | 0.002097509 | -0.098069971 | -0.052207278 | RGS3, RP11-168K11.2        |

|       |           |           |      |   |    |             |             |             |             |              |              |                       |
|-------|-----------|-----------|------|---|----|-------------|-------------|-------------|-------------|--------------|--------------|-----------------------|
| chr3  | 72151345  | 72151536  | 192  | * | 2  | 2.43555E-08 | 0.000842503 | 0.007903581 | 0.001481471 | -0.134596447 | -0.120622597 | LINC00877             |
| chr16 | 67424195  | 67425219  | 1025 | * | 5  | 1.29015E-10 | 0.024212309 | 0.007929694 | 0.002910685 | -0.212823239 | -0.073712838 | TPPP3, RNU1-123P      |
| chr1  | 246843900 | 246844422 | 523  | * | 3  | 2.27065E-11 | 7.57265E-05 | 0.007936299 | 0.000212908 | 0.12369762   | 0.088771025  |                       |
| chr9  | 124073197 | 124073313 | 117  | * | 3  | 5.30551E-08 | 0.007264906 | 0.007942331 | 0.003990651 | 0.095476059  | 0.044767726  | GSN                   |
| chr17 | 80192565  | 80194552  | 1988 | * | 14 | 5.50413E-17 | 0.005397154 | 0.007950863 | 0.000352415 | 0.138160728  | -0.027207541 | SLC16A3               |
| chr11 | 66725504  | 66726268  | 765  | * | 9  | 1.91034E-10 | 0.041801477 | 0.00797268  | 0.014385302 | -0.128494369 | -0.010962735 | PC                    |
| chr20 | 1926131   | 1927911   | 1781 | * | 8  | 3.27553E-12 | 0.002058618 | 0.007976472 | 8.95381E-05 | -0.321378052 | -0.065360816 | RP4-684O24.5          |
| chr9  | 91933073  | 91933906  | 834  | * | 10 | 3.99373E-12 | 0.016975758 | 0.007977889 | 0.007274364 | -0.054389864 | -0.013116631 | SECISBP2              |
| chr16 | 11449467  | 11449661  | 195  | * | 2  | 6.58409E-09 | 0.000695366 | 0.007983086 | 0.001273005 | 0.10738787   | 0.100430129  |                       |
| chr15 | 89181732  | 89182208  | 477  | * | 6  | 5.04454E-09 | 0.091868683 | 0.007985141 | 0.023180949 | -0.117142733 | -0.009894456 | ISG20                 |
| chr19 | 42380725  | 42381258  | 534  | * | 4  | 2.36504E-12 | 0.003019469 | 0.007985772 | 0.000668904 | -0.109167217 | -0.062054608 | CD79A                 |
| chr14 | 54954596  | 54955579  | 984  | * | 4  | 2.35953E-11 | 0.002697302 | 0.007987341 | 0.000850854 | 0.149811576  | 0.050337094  | GMFB                  |
| chr11 | 73308991  | 73310242  | 1252 | * | 14 | 5.43023E-14 | 0.02775642  | 0.007989248 | 0.011023922 | -0.274765733 | -0.027665278 | FAM168A               |
| chr3  | 114012316 | 114012912 | 597  | * | 5  | 1.24567E-14 | 0.014448066 | 0.007989288 | 0.00042669  | 0.162580914  | 0.06356193   | TIGIT                 |
| chr19 | 825035    | 825052    | 18   | * | 3  | 1.26826E-12 | 2.59309E-05 | 0.007993663 | 9.75078E-05 | -0.179331332 | -0.162347717 |                       |
| chr22 | 23523942  | 23524136  | 195  | * | 2  | 1.07777E-07 | 0.010761882 | 0.007994772 | 0.008647172 | -0.038942848 | -0.031350439 | BCR                   |
| chr14 | 74317981  | 74318494  | 514  | * | 11 | 1.53851E-15 | 0.065870695 | 0.007999165 | 0.011099271 | -0.206491952 | -0.04184882  |                       |
| chr12 | 121022424 | 121022843 | 420  | * | 4  | 3.37202E-10 | 0.004233477 | 0.008009271 | 0.005165273 | 0.054525135  | 0.02831176   |                       |
| chr1  | 208085455 | 208085889 | 435  | * | 2  | 1.33346E-09 | 0.006624489 | 0.008020461 | 0.006499657 | -0.158312904 | -0.113701665 |                       |
| chr1  | 153513810 | 153514482 | 673  | * | 4  | 6.58932E-11 | 0.001206907 | 0.008021132 | 0.001450116 | 0.143855879  | 0.091397105  | S100A5                |
| chr11 | 64836948  | 64837316  | 369  | * | 3  | 3.62011E-09 | 0.008066347 | 0.008021227 | 0.003450513 | -0.078061933 | -0.050934119 | CDC45                 |
| chr1  | 235091106 | 235091608 | 503  | * | 4  | 4.05604E-13 | 0.000467541 | 0.008024715 | 0.000883078 | -0.168957147 | -0.080902387 |                       |
| chr8  | 6565029   | 6566322   | 1294 | * | 15 | 1.17743E-12 | 0.135669377 | 0.008030682 | 0.041517971 | -0.037960061 | 0.003825532  | AGPAT5, CTD-2541M15.1 |
| chr1  | 95583406  | 95583636  | 231  | * | 2  | 2.91518E-09 | 0.009875391 | 0.008030919 | 0.008253713 | 0.040866459  | 0.023092153  | TMEM56, TMEM56-RWDD3  |
| chr12 | 116996359 | 116997022 | 664  | * | 6  | 2.76529E-12 | 0.01529437  | 0.008044475 | 0.005267574 | 0.192594351  | 0.059781188  |                       |
| chr7  | 128579876 | 128580792 | 917  | * | 9  | 2.4743E-22  | 8.42458E-08 | 0.008046012 | 5.24937E-07 | -0.179995445 | -0.072141091 | IRF5                  |
| chr2  | 129251945 | 129252477 | 533  | * | 2  | 1.63327E-09 | 0.000341473 | 0.008049479 | 0.000705381 | 0.13181505   | 0.106383501  |                       |
| chr19 | 846179    | 846354    | 176  | * | 3  | 6.06836E-11 | 8.0298E-05  | 0.008057211 | 0.000226539 | -0.195860542 | -0.158758807 | PRTN3                 |
| chr19 | 34287017  | 34287540  | 524  | * | 5  | 1.47687E-11 | 0.006820344 | 0.008062879 | 0.001951376 | -0.069979428 | -0.021890463 | KCTD15                |

|       |           |           |      |   |    |             |             |             |             |              |              |                                 |
|-------|-----------|-----------|------|---|----|-------------|-------------|-------------|-------------|--------------|--------------|---------------------------------|
| chr3  | 151102860 | 151102879 | 20   | * | 2  | 1.56851E-07 | 0.002502575 | 0.00806514  | 0.003400342 | -0.234704922 | -0.177721749 | MED12L                          |
| chr1  | 184775205 | 184775699 | 495  | * | 3  | 4.04524E-10 | 0.000623996 | 0.008072786 | 0.001090703 | -0.201372236 | -0.119725679 | FAM129A                         |
| chr16 | 89724306  | 89724915  | 610  | * | 5  | 4.17537E-10 | 0.039628014 | 0.008072827 | 0.017460063 | 0.025136591  | 0.01071338   | SPATA33                         |
| chr1  | 54356260  | 54356568  | 309  | * | 4  | 2.17638E-12 | 0.251584365 | 0.008078031 | 0.005147172 | -0.2550664   | -0.08977877  | YIPF1                           |
| chr3  | 69249276  | 69250885  | 1610 | * | 7  | 6.51183E-11 | 0.000545833 | 0.008086948 | 0.000324134 | 0.174068471  | 0.048710693  | FRMD4B                          |
| chr2  | 85817259  | 85817956  | 698  | * | 3  | 9.0096E-10  | 0.000207531 | 0.008089272 | 0.000522882 | -0.232444172 | -0.070654947 | VAMP5                           |
| chr7  | 148801711 | 148802155 | 445  | * | 3  | 1.6573E-11  | 7.56665E-05 | 0.008089794 | 0.000224104 | 0.14178414   | 0.117758844  | ZNF425                          |
| chr1  | 209798124 | 209798721 | 598  | * | 2  | 1.02568E-08 | 0.009014849 | 0.008096741 | 0.007861224 | -0.219778922 | -0.081205819 | LAMB3                           |
| chr2  | 182756909 | 182757482 | 574  | * | 4  | 4.18965E-10 | 0.038869804 | 0.008122292 | 0.009614675 | 0.017296697  | 9.23599E-06  | SSFA2                           |
| chr8  | 125685871 | 125685873 | 3    | * | 2  | 1.12668E-08 | 0.000358307 | 0.008132756 | 0.00073643  | 0.1103386    | 0.088523144  | MTSS1                           |
| chr12 | 114403667 | 114405061 | 1395 | * | 12 | 1.89802E-12 | 0.060185813 | 0.008136842 | 0.007385091 | -0.23090409  | -0.012434961 | RBM19                           |
| chr8  | 102216949 | 102217924 | 976  | * | 10 | 1.90115E-11 | 0.298161452 | 0.008139039 | 0.087875433 | -0.047148121 | -0.014984193 | ZNF706                          |
| chr22 | 27006126  | 27006498  | 373  | * | 2  | 4.71191E-09 | 0.000340195 | 0.008141053 | 0.000704694 | 0.1696524    | 0.151546687  | CRYBB1                          |
| chr12 | 122238038 | 122239035 | 998  | * | 7  | 3.25621E-10 | 0.119115223 | 0.008141068 | 0.01710199  | -0.084879771 | -0.009340003 | RP11-347119.8, RHOF, AC084018.1 |
| chr19 | 36485959  | 36486149  | 191  | * | 5  | 1.12743E-07 | 0.227741284 | 0.008143136 | 0.052855369 | -0.025078183 | -0.00838532  | SDHAF1                          |
| chr22 | 18601993  | 18602121  | 129  | * | 2  | 5.29686E-08 | 0.000941017 | 0.008145454 | 0.001631004 | 0.090901909  | 0.085069032  | PEX26, TUBA8                    |
| chr7  | 56120127  | 56120290  | 164  | * | 2  | 7.24732E-08 | 0.032988997 | 0.008150413 | 0.015197089 | -0.053789583 | -0.042135249 | CCT6A                           |
| chr17 | 26799289  | 26799509  | 221  | * | 4  | 7.19343E-09 | 0.028516073 | 0.008150566 | 0.006964197 | 0.115681996  | 0.032932008  | RP11-192H23.4                   |
| chr3  | 50387780  | 50388823  | 1044 | * | 19 | 6.16609E-14 | 0.12318568  | 0.008154094 | 0.055627426 | 0.035182703  | 0.004959323  | CYB561D2, XXcos-LUCA11.5, NPRL2 |
| chr7  | 2800436   | 2800791   | 356  | * | 3  | 1.3322E-08  | 0.094507935 | 0.008157569 | 0.019146373 | 0.141255507  | 0.058431247  | AMZ1, GNA12                     |
| chr14 | 23479311  | 23479801  | 491  | * | 7  | 2.11552E-12 | 0.009113396 | 0.008158587 | 0.00233554  | 0.090265755  | 0.031770071  | C14orf93                        |
| chr14 | 105219617 | 105220026 | 410  | * | 3  | 2.00036E-09 | 0.053544728 | 0.00817807  | 0.014514064 | 0.01436944   | 0.008250156  | SIVA1                           |
| chr5  | 134208721 | 134209038 | 318  | * | 3  | 7.66219E-10 | 0.001840098 | 0.008204797 | 0.002500802 | 0.158779077  | 0.033623586  |                                 |
| chr13 | 45150990  | 45151437  | 448  | * | 2  | 7.97118E-12 | 0.000741014 | 0.008205961 | 0.00134974  | -0.094285005 | -0.037585754 | TSC22D1                         |
| chr1  | 3801660   | 3801728   | 69   | * | 3  | 3.80835E-09 | 0.000711149 | 0.00821203  | 0.00109849  | 0.104016422  | 0.087979635  | DFFB                            |
| chr17 | 48970334  | 48970357  | 24   | * | 2  | 1.90241E-09 | 0.000427317 | 0.008220817 | 0.000856854 | -0.253880401 | -0.215677059 | TOB1-AS1                        |
| chr10 | 3868080   | 3868493   | 414  | * | 3  | 1.51521E-09 | 0.003191598 | 0.008221169 | 0.003304102 | 0.123372457  | 0.074139351  |                                 |
| chr11 | 68606654  | 68607257  | 604  | * | 4  | 1.23903E-09 | 0.019694611 | 0.008224532 | 0.008140001 | -0.035934221 | -0.000171976 | CPT1A                           |
| chr12 | 65671664  | 65672174  | 511  | * | 5  | 2.12845E-13 | 0.003645707 | 0.008224772 | 0.001873259 | -0.189203887 | -0.076194698 |                                 |

|       |           |           |      |   |    |             |             |             |             |              |              |                                             |
|-------|-----------|-----------|------|---|----|-------------|-------------|-------------|-------------|--------------|--------------|---------------------------------------------|
| chr3  | 138657429 | 138658243 | 815  | * | 4  | 3.68218E-09 | 0.180530152 | 0.008225312 | 0.056295805 | 0.04115314   | 0.001862438  | RP11-548O1.3                                |
| chr20 | 23113228  | 23113870  | 643  | * | 4  | 1.62228E-14 | 2.66333E-06 | 0.008244062 | 1.66447E-05 | -0.24134371  | -0.108255234 | LINC00656                                   |
| chr19 | 45457673  | 45459103  | 1431 | * | 20 | 9.4207E-21  | 0.029323308 | 0.008245119 | 0.001154483 | -0.06446077  | -0.00061471  | CLPTM1                                      |
| chr2  | 24306908  | 24308660  | 1753 | * | 18 | 2.28367E-16 | 0.061065549 | 0.008247118 | 0.0055219   | -0.082367055 | -0.003087008 | FAM228B, TP53I3                             |
| chr20 | 61568856  | 61569754  | 899  | * | 8  | 8.74354E-11 | 0.023234573 | 0.00824801  | 0.016821732 | -0.023630128 | 0.00020085   | GID8, DIDO1                                 |
| chr7  | 112120730 | 112121259 | 530  | * | 9  | 2.04804E-17 | 0.010596457 | 0.008271189 | 0.00021599  | 0.192446268  | 0.059661367  | IFRD1, LSMEM1                               |
| chr4  | 468196    | 468201    | 6    | * | 2  | 1.85009E-07 | 0.00039613  | 0.008273077 | 0.000804762 | -0.04850124  | -0.046134442 | ZNF721                                      |
| chr11 | 70048796  | 70049600  | 805  | * | 14 | 1.90784E-13 | 0.226907211 | 0.00827312  | 0.026831117 | -0.231798766 | -0.023126885 | FADD                                        |
| chr10 | 112127385 | 112127915 | 531  | * | 2  | 1.71637E-08 | 0.000498437 | 0.008285346 | 0.0009766   | 0.116024113  | 0.102400112  |                                             |
| chr2  | 60610208  | 60611170  | 963  | * | 5  | 2.69081E-12 | 0.003483273 | 0.008287963 | 0.001375242 | -0.113682783 | -0.019496242 | AC007381.2                                  |
| chr16 | 50743027  | 50743296  | 270  | * | 2  | 1.22829E-08 | 0.001412233 | 0.008291969 | 0.002248659 | -0.136498753 | -0.103499137 | NOD2                                        |
| chr9  | 35538212  | 35539509  | 1298 | * | 7  | 4.28463E-16 | 0.009256351 | 0.008298033 | 0.001197424 | -0.199139647 | -0.067142452 | RUSC2                                       |
| chr2  | 60687132  | 60687823  | 692  | * | 4  | 2.4487E-13  | 5.20865E-05 | 0.00829837  | 0.000138446 | -0.243267239 | -0.105747446 | BCL11A                                      |
| chr10 | 23384047  | 23385979  | 1933 | * | 8  | 4.13528E-15 | 0.000538132 | 0.008312053 | 4.56641E-05 | -0.217927583 | -0.029097973 | MSRB2                                       |
| chr17 | 27918761  | 27920934  | 2174 | * | 15 | 2.3291E-17  | 3.83712E-05 | 0.008312691 | 0.000129501 | 0.046690586  | 0.000489165  | RP11-68I3.2, ANKRD13B, GIT1,<br>RP11-68I3.7 |
| chr19 | 46915776  | 46916588  | 813  | * | 4  | 4.0544E-15  | 3.66924E-05 | 0.008328087 | 0.000129711 | 0.179162232  | 0.095459391  | CCDC8                                       |
| chr8  | 145180747 | 145180933 | 187  | * | 2  | 1.54019E-07 | 0.011098035 | 0.008331248 | 0.008990329 | -0.066244394 | -0.050341174 |                                             |
| chr11 | 66055170  | 66055683  | 514  | * | 4  | 1.37691E-15 | 3.39709E-05 | 0.008348838 | 8.86643E-05 | -0.121404085 | -0.110448537 | YIF1A                                       |
| chr5  | 126312517 | 126312773 | 257  | * | 2  | 1.34878E-08 | 0.000388524 | 0.008361893 | 0.000793361 | 0.176098205  | 0.155049016  | MARCH3                                      |
| chr2  | 241507374 | 241508108 | 735  | * | 8  | 3.01587E-12 | 0.009657629 | 0.008363944 | 0.002394089 | -0.055204667 | -0.006769628 | RNPEPL1, ANKMY1                             |
| chr7  | 45151048  | 45152241  | 1194 | * | 14 | 3.19672E-13 | 0.304125297 | 0.008366659 | 0.038401338 | -0.160775964 | -0.013437649 | TBRG4                                       |
| chr5  | 156696185 | 156696520 | 336  | * | 4  | 6.72644E-15 | 4.86498E-06 | 0.008367289 | 2.89859E-05 | -0.220103229 | -0.175194315 | CYFIP2                                      |
| chr7  | 156833137 | 156833196 | 60   | * | 2  | 4.77557E-08 | 0.008940455 | 0.008371325 | 0.007954883 | 0.128749173  | 0.079092939  |                                             |
| chr2  | 237780629 | 237780791 | 163  | * | 2  | 4.56511E-09 | 0.000399664 | 0.008373387 | 0.000812853 | -0.275945181 | -0.272939472 |                                             |
| chr6  | 156885358 | 156886090 | 733  | * | 5  | 2.77922E-11 | 0.008953789 | 0.008382903 | 0.001484198 | 0.082188811  | 0.045289965  |                                             |
| chr1  | 51984744  | 51985215  | 472  | * | 7  | 6.37555E-14 | 0.014100789 | 0.008383916 | 0.004146305 | 0.03338447   | 0.013676031  | RP11-191G24.1, EPS15                        |
| chr5  | 158758490 | 158758705 | 216  | * | 3  | 1.22661E-07 | 0.006999828 | 0.008384011 | 0.005587935 | 0.019074882  | 0.013662887  | AC008697.1                                  |
| chr20 | 62491759  | 62492820  | 1062 | * | 8  | 2.35481E-14 | 0.001071523 | 0.008393212 | 0.001227404 | -0.241665761 | -0.024498503 | ABHD16B                                     |
| chr10 | 73488971  | 73489276  | 306  | * | 3  | 2.19916E-10 | 0.000624841 | 0.008393637 | 0.000874172 | -0.201118863 | -0.109205413 | CDH23, C10orf105                            |

|       |           |           |      |   |    |             |             |             |             |              |              |                                      |
|-------|-----------|-----------|------|---|----|-------------|-------------|-------------|-------------|--------------|--------------|--------------------------------------|
| chr19 | 58816220  | 58816722  | 503  | * | 5  | 9.42774E-11 | 0.074947118 | 0.008403816 | 0.004939532 | 0.069480715  | 0.014446622  | AC010642.1, ERVK3-1                  |
| chr1  | 23907333  | 23907905  | 573  | * | 4  | 1.15472E-11 | 0.001511918 | 0.008407338 | 0.000697873 | 0.166501822  | 0.094190151  |                                      |
| chr12 | 3836653   | 3838094   | 1442 | * | 7  | 4.46077E-15 | 6.72347E-07 | 0.008437618 | 4.69786E-06 | -0.30119632  | -0.103138459 | EFCAB4B                              |
| chr14 | 23790225  | 23791411  | 1187 | * | 11 | 3.22167E-18 | 0.003783961 | 0.008440187 | 0.000389871 | -0.038398403 | -0.009311543 | BCL2L2-PABPN1, PABPN1,<br>AL049829.1 |
| chr7  | 158263204 | 158263984 | 781  | * | 4  | 1.6272E-12  | 0.00015169  | 0.008453297 | 0.000305118 | -0.224399543 | -0.138645229 | PTPRN2                               |
| chr3  | 46778871  | 46779226  | 356  | * | 3  | 3.63191E-10 | 0.003383045 | 0.008460354 | 0.001456132 | 0.143603927  | 0.073846807  | PRSS50                               |
| chr16 | 72206241  | 72206655  | 415  | * | 5  | 3.50482E-09 | 0.398565522 | 0.008463817 | 0.017819134 | -0.1982697   | -0.064119259 | PMFBP1                               |
| chr12 | 76424649  | 76424973  | 325  | * | 4  | 9.99423E-10 | 0.010147992 | 0.008467417 | 0.008328965 | 0.032290343  | 0.002451308  | RP11-290L1.3, PHLDA1                 |
| chr11 | 13485254  | 13485556  | 303  | * | 3  | 4.53993E-09 | 0.270211888 | 0.008493805 | 0.039361128 | -0.243913823 | -0.082653399 |                                      |
| chr15 | 79229592  | 79229985  | 394  | * | 5  | 6.11354E-14 | 0.000232739 | 0.008498996 | 0.00013842  | -0.219637174 | -0.021611618 | CTSH                                 |
| chr16 | 55794282  | 55794910  | 629  | * | 5  | 1.48915E-11 | 0.012113708 | 0.008503218 | 0.001496213 | -0.192048608 | -0.11806469  | CES1P1                               |
| chr5  | 134210233 | 134210859 | 627  | * | 9  | 1.60169E-09 | 0.2242503   | 0.008509964 | 0.066670803 | 0.066507243  | 0.01596955   | TXNDC15                              |
| chr13 | 99739316  | 99740388  | 1073 | * | 8  | 2.98776E-13 | 0.007576314 | 0.008513702 | 0.001013947 | 0.09226936   | 0.022687414  | DOCK9-AS2                            |
| chr2  | 201450323 | 201451026 | 704  | * | 13 | 6.0959E-09  | 0.331564618 | 0.008517998 | 0.167833011 | 0.112905167  | 0.004873838  | AOX1                                 |
| chr4  | 102734752 | 102734940 | 189  | * | 3  | 6.57614E-08 | 0.00267611  | 0.008519072 | 0.003592971 | 0.114532716  | 0.087415786  | BANK1                                |
| chr12 | 114886059 | 114886561 | 503  | * | 4  | 5.38721E-08 | 0.135702798 | 0.00852132  | 0.026079483 | 0.100028073  | 0.02481024   |                                      |
| chr12 | 125258948 | 125259401 | 454  | * | 4  | 3.35256E-12 | 3.04408E-05 | 0.008523771 | 0.00012152  | -0.31196405  | -0.120641451 |                                      |
| chr2  | 232790231 | 232791964 | 1734 | * | 15 | 1.3661E-13  | 0.018638643 | 0.008527355 | 0.004050001 | 0.020822124  | 0.007385825  | NPPC                                 |
| chr1  | 201709135 | 201709390 | 256  | * | 3  | 3.61713E-08 | 0.980408187 | 0.008527983 | 0.068561961 | -0.057858177 | -0.019366279 | NAV1, IPO9-AS1                       |
| chr16 | 202482    | 202565    | 84   | * | 3  | 3.22908E-11 | 5.91864E-05 | 0.008533516 | 0.000188958 | 0.206584488  | 0.141301626  |                                      |
| chr21 | 46334192  | 46334322  | 131  | * | 3  | 4.71408E-09 | 0.00523643  | 0.008537227 | 0.001756703 | -0.114534317 | -0.062802819 | ITGB2                                |
| chr9  | 92219187  | 92220617  | 1431 | * | 10 | 4.34413E-13 | 0.0687557   | 0.008550205 | 0.004751711 | -0.068017986 | -0.009658125 | GADD45G                              |
| chr12 | 123632825 | 123634384 | 1560 | * | 6  | 1.64632E-12 | 7.28418E-05 | 0.008560614 | 0.0001198   | 0.200026825  | 0.101485204  | PITPNM2                              |
| chr17 | 61698753  | 61700755  | 2003 | * | 13 | 7.95137E-22 | 1.90766E-06 | 0.008562048 | 1.29375E-06 | -0.084325835 | -0.012799544 | MAP3K3                               |
| chr2  | 11527246  | 11527344  | 99   | * | 3  | 1.06084E-11 | 2.58549E-05 | 0.008568056 | 9.8205E-05  | 0.11282003   | 0.102360557  |                                      |
| chr14 | 55850710  | 55850801  | 92   | * | 2  | 1.33747E-09 | 0.000447429 | 0.008572148 | 0.000898658 | 0.110250975  | 0.094173641  | ATG14                                |
| chr17 | 39780836  | 39781997  | 1162 | * | 4  | 1.50001E-11 | 2.53931E-05 | 0.008572809 | 9.2661E-05  | -0.197223912 | -0.111060041 | KRT17, JUP                           |
| chr16 | 21288548  | 21288557  | 10   | * | 2  | 5.08935E-08 | 0.003610157 | 0.008577355 | 0.004501369 | 0.117220462  | 0.115445174  | CRYM                                 |
| chr19 | 50848091  | 50848114  | 24   | * | 2  | 1.42973E-08 | 0.000377255 | 0.008586079 | 0.000777852 | 0.149747721  | 0.112756145  | NR1H2                                |

|       |           |           |      |   |    |             |             |             |             |              |              |                            |
|-------|-----------|-----------|------|---|----|-------------|-------------|-------------|-------------|--------------|--------------|----------------------------|
| chr13 | 76123086  | 76124267  | 1182 | * | 15 | 1.00976E-14 | 0.197832662 | 0.008587169 | 0.029368241 | 0.031947357  | 0.006712294  | UCLH3, RP11-29G8.3, COMMD6 |
| chr14 | 20945034  | 20945319  | 286  | * | 2  | 1.68695E-08 | 0.000914249 | 0.008598181 | 0.001617817 | 0.099708938  | 0.089281837  | PNP, RP11-203M5.8          |
| chr15 | 80452147  | 80452305  | 159  | * | 4  | 2.63307E-08 | 0.006044845 | 0.008598247 | 0.00668945  | 0.121457847  | 0.070006993  | FAH                        |
| chr17 | 2095079   | 2095179   | 101  | * | 2  | 1.41288E-08 | 0.000565381 | 0.008604643 | 0.001093905 | -0.194186341 | -0.147525912 | SMG6                       |
| chr16 | 57392173  | 57392764  | 592  | * | 5  | 4.24302E-10 | 0.223261015 | 0.008608576 | 0.01971589  | -0.149683686 | -0.049837633 | CCL22                      |
| chr2  | 219849782 | 219850123 | 342  | * | 2  | 1.23158E-08 | 0.000723938 | 0.00863049  | 0.001341462 | -0.032857163 | -0.000979929 | FEV                        |
| chr1  | 172419004 | 172419269 | 266  | * | 2  | 5.33052E-09 | 0.00041053  | 0.008634743 | 0.000836807 | -0.188887231 | -0.113222894 | C1orf105                   |
| chr1  | 223316927 | 223317548 | 622  | * | 6  | 3.96506E-11 | 0.189819776 | 0.00864251  | 0.011642595 | 0.109239396  | 0.037035859  | RP11-239E10.2              |
| chr22 | 23909175  | 23909219  | 45   | * | 3  | 3.47704E-08 | 0.02058135  | 0.008652194 | 0.005821548 | 0.106143275  | 0.052225156  |                            |
| chr9  | 139333297 | 139333683 | 387  | * | 2  | 1.925E-11   | 0.000701029 | 0.0086542   | 0.001307618 | -0.032667165 | -0.023038041 | INPP5E                     |
| chr2  | 208575645 | 208576794 | 1150 | * | 14 | 7.05908E-13 | 0.090276133 | 0.008656335 | 0.020465167 | -0.073402726 | -0.009390209 | CCNYL1                     |
| chr10 | 32217547  | 32218391  | 845  | * | 12 | 1.06031E-14 | 0.094510169 | 0.008658303 | 0.007141325 | 0.031829551  | -0.002170384 | ARHGAP12                   |
| chr6  | 40554379  | 40555076  | 698  | * | 8  | 2.78216E-09 | 0.320421812 | 0.00865846  | 0.059655838 | 0.043545956  | 0.004096044  | LRFN2                      |
| chr3  | 46394241  | 46395542  | 1302 | * | 7  | 6.88104E-16 | 4.08309E-06 | 0.008664503 | 1.16918E-05 | 0.181398567  | 0.043220275  | CCR2                       |
| chr2  | 166809971 | 166811308 | 1338 | * | 12 | 3.46855E-13 | 0.018870581 | 0.008666918 | 0.002496297 | -0.154078718 | -0.029451849 | TTC21B                     |
| chr21 | 40310499  | 40310774  | 276  | * | 3  | 2.81059E-09 | 0.001866814 | 0.008674831 | 0.002952739 | 0.121731661  | 0.067683528  | AF064858.6                 |
| chr1  | 26086818  | 26087303  | 486  | * | 2  | 6.46849E-09 | 0.013961114 | 0.008681977 | 0.010433214 | 0.199776205  | 0.121722564  | MAN1C1                     |
| chr10 | 106013534 | 106014624 | 1091 | * | 13 | 7.12171E-16 | 0.061766163 | 0.008685577 | 0.002597601 | 0.136403506  | 0.000895508  | GSTO1                      |
| chr6  | 31237824  | 31238388  | 565  | * | 3  | 1.09178E-13 | 2.29656E-05 | 0.008685956 | 8.9633E-05  | -0.22241722  | -0.060768737 | HLA-C                      |
| chr5  | 176936872 | 176938522 | 1651 | * | 11 | 3.88724E-23 | 4.3587E-05  | 0.008691197 | 1.04375E-05 | -0.23972192  | -0.084776694 | DOK3                       |
| chr17 | 80860956  | 80861380  | 425  | * | 4  | 1.00937E-08 | 0.024586718 | 0.008699313 | 0.007804532 | -0.09800795  | -0.036731877 | TBCD                       |
| chr2  | 9919440   | 9919730   | 291  | * | 3  | 4.87071E-09 | 0.001974192 | 0.008704294 | 0.002519158 | 0.141477628  | 0.054838392  |                            |
| chr16 | 89469541  | 89469729  | 189  | * | 2  | 3.60261E-08 | 0.001369774 | 0.00870591  | 0.002229937 | -0.200669067 | -0.146579549 | ANKRD11, RP1-168P16.2      |
| chr17 | 43208740  | 43209292  | 553  | * | 4  | 8.79035E-09 | 0.018139278 | 0.008708464 | 0.010618578 | -0.173421512 | -0.036581894 | PLCD3                      |
| chr11 | 47470768  | 47471789  | 1022 | * | 10 | 1.15598E-16 | 0.092504761 | 0.008710019 | 0.008203484 | -0.3538143   | -0.07724055  |                            |
| chr2  | 9458925   | 9459596   | 672  | * | 7  | 9.05156E-14 | 0.009162087 | 0.008710986 | 0.0007833   | 0.10695684   | 0.04571035   | ASAP2                      |
| chr1  | 100816943 | 100817300 | 358  | * | 7  | 4.04052E-12 | 0.024749417 | 0.008713538 | 0.006093704 | -0.034310145 | -0.010074334 | CDC14A                     |
| chr19 | 42894425  | 42894930  | 506  | * | 8  | 5.47663E-13 | 0.001000647 | 0.008715744 | 0.00137393  | 0.165368906  | 0.07445406   | CNFN                       |
| chr20 | 30104637  | 30104660  | 24   | * | 2  | 1.51803E-07 | 0.002523668 | 0.008722473 | 0.003520787 | -0.23956725  | -0.142658493 | HM13                       |

|       |           |           |      |   |    |             |             |             |             |              |              |                                     |
|-------|-----------|-----------|------|---|----|-------------|-------------|-------------|-------------|--------------|--------------|-------------------------------------|
| chr5  | 32395298  | 32395364  | 67   | * | 2  | 5.26996E-09 | 0.000398148 | 0.008723151 | 0.000816986 | -0.187261761 | -0.176347019 | ZFR                                 |
| chr12 | 120632764 | 120633105 | 342  | * | 5  | 5.04664E-09 | 0.131528052 | 0.008741827 | 0.01344097  | -0.098894894 | -0.015673952 |                                     |
| chr8  | 141074510 | 141074581 | 72   | * | 2  | 1.69347E-08 | 0.000411818 | 0.008753582 | 0.00084137  | 0.14054157   | 0.12027132   | TRAPPC9                             |
| chr18 | 5579335   | 5579338   | 4    | * | 2  | 6.80641E-09 | 0.000390631 | 0.008759211 | 0.00080449  | -0.154817342 | -0.154790624 | EPB41L3                             |
| chr2  | 178116991 | 178117066 | 76   | * | 2  | 9.397E-08   | 0.000951518 | 0.00876161  | 0.00167877  | -0.22637464  | -0.174080996 | NFE2L2                              |
| chr4  | 185771716 | 185772619 | 904  | * | 3  | 4.5747E-10  | 4.73384E-05 | 0.008765416 | 0.000165099 | -0.145730578 | -0.134366173 | RP11-701P16.5, MIR3945              |
| chr10 | 75173179  | 75174496  | 1318 | * | 15 | 5.6913E-13  | 0.07932039  | 0.008770189 | 0.018553506 | -0.041421161 | -0.005006999 | ANXA7                               |
| chr17 | 79479952  | 79481801  | 1850 | * | 10 | 1.00558E-12 | 0.00119526  | 0.00877462  | 0.000950616 | -0.064068857 | -0.010508823 | RP13-766D20.1, RP13-766D20.2, ACTG1 |
| chr11 | 70253427  | 70253499  | 73   | * | 3  | 7.47387E-11 | 6.73414E-05 | 0.008775856 | 0.000208532 | 0.152901275  | 0.11852739   | CTTN                                |
| chr11 | 70961596  | 70962357  | 762  | * | 6  | 5.67971E-09 | 0.047066608 | 0.008787586 | 0.015785956 | 0.041287473  | 0.019039659  | SHANK2                              |
| chr10 | 103824106 | 103824819 | 714  | * | 3  | 8.55966E-12 | 0.000561982 | 0.008792236 | 0.000783076 | 0.152255866  | 0.076929144  |                                     |
| chr12 | 8834114   | 8834151   | 38   | * | 3  | 8.937E-08   | 0.027625443 | 0.00879644  | 0.00761953  | -0.155443723 | -0.086044256 |                                     |
| chr8  | 28258603  | 28259252  | 650  | * | 3  | 2.97502E-11 | 0.000222003 | 0.008810476 | 0.000574412 | 0.064957531  | 0.035144853  | ZNF395, FBXO16                      |
| chr6  | 10722915  | 10723588  | 674  | * | 11 | 1.89774E-09 | 0.225974143 | 0.008818418 | 0.065755482 | 0.01550722   | 0.005628145  | TMEM14C                             |
| chr8  | 35093901  | 35094053  | 153  | * | 3  | 1.10476E-08 | 0.331424205 | 0.008823577 | 0.050536492 | 0.023233905  | 0.013020798  | UNC5D                               |
| chr21 | 33783915  | 33785063  | 1149 | * | 13 | 8.3232E-14  | 0.008830969 | 0.008829025 | 0.009901966 | 0.035417962  | 0.006083985  | EVA1C                               |
| chr6  | 18386873  | 18387809  | 937  | * | 12 | 9.46183E-17 | 0.095658773 | 0.008829354 | 0.002141984 | 0.041703915  | 0.015415019  | RNF144B                             |
| chr9  | 117156701 | 117157157 | 457  | * | 4  | 8.2417E-10  | 0.015385518 | 0.00883025  | 0.003593541 | -0.321643129 | -0.130530554 |                                     |
| chr6  | 170462469 | 170462947 | 479  | * | 3  | 3.20721E-08 | 0.010188951 | 0.008834236 | 0.005412953 | 0.10808149   | 0.070114322  |                                     |
| chr2  | 11531606  | 11531852  | 247  | * | 2  | 1.65088E-09 | 0.000563872 | 0.008836784 | 0.001098115 | 0.158099304  | 0.140015724  |                                     |
| chr19 | 35491265  | 35491296  | 32   | * | 2  | 8.69511E-08 | 0.004835766 | 0.0088411   | 0.005551303 | 0.029489953  | 0.020892495  | GRAMD1A                             |
| chr11 | 68039143  | 68039669  | 527  | * | 6  | 1.6249E-08  | 0.014572799 | 0.008842556 | 0.015941625 | 0.025035415  | 0.00377607   | C11orf24                            |
| chr11 | 47968764  | 47968995  | 232  | * | 2  | 4.82312E-08 | 0.000838771 | 0.008851293 | 0.001521304 | -0.139904619 | -0.114348123 |                                     |
| chr2  | 172290183 | 172291397 | 1215 | * | 13 | 1.9784E-11  | 0.185359335 | 0.00885918  | 0.028550465 | -0.042763763 | 0.004084865  | DCAF17, METTL8                      |
| chr7  | 33944924  | 33944927  | 4    | * | 2  | 2.08217E-09 | 0.000400903 | 0.008863595 | 0.000824426 | -0.050397857 | -0.041227549 | BMPER                               |
| chr9  | 117373787 | 117374308 | 522  | * | 3  | 1.18558E-08 | 0.052814128 | 0.008874306 | 0.019230254 | 0.02992192   | 0.007132379  | C9orf91                             |
| chr12 | 739312    | 740338    | 1027 | * | 6  | 1.85789E-19 | 5.33082E-08 | 0.008882888 | 8.2308E-07  | -0.335420313 | -0.241626985 | RP11-218M22.1, NINJ2                |
| chr1  | 2250136   | 2250525   | 390  | * | 3  | 1.02272E-08 | 0.007136045 | 0.008900224 | 0.007471271 | 0.188429451  | 0.08725198   |                                     |
| chr17 | 9862147   | 9862446   | 300  | * | 4  | 2.42675E-09 | 0.067119526 | 0.008908343 | 0.011571878 | -0.089815453 | -0.033588122 | GAS7                                |



|       |           |           |      |   |    |             |             |             |             |              |              |                       |
|-------|-----------|-----------|------|---|----|-------------|-------------|-------------|-------------|--------------|--------------|-----------------------|
| chr3  | 169378675 | 169379010 | 336  | * | 6  | 2.02032E-09 | 0.095534369 | 0.008914633 | 0.019393174 | 0.052807959  | 0.023236211  | MECOM                 |
| chr9  | 131085470 | 131085780 | 311  | * | 3  | 3.61762E-09 | 0.022772911 | 0.00891808  | 0.013377205 | -0.040931349 | -0.001666391 | COQ4                  |
| chr12 | 32832461  | 32832968  | 508  | * | 3  | 5.3816E-10  | 0.001763234 | 0.00892565  | 0.002782614 | -0.044871116 | -0.007533387 | DNM1L                 |
| chr15 | 41184874  | 41185399  | 526  | * | 2  | 5.39453E-10 | 0.00040574  | 0.008930671 | 0.000834147 | -0.206641561 | -0.153085814 |                       |
| chr2  | 106795252 | 106795369 | 118  | * | 2  | 1.01955E-07 | 0.001573391 | 0.008956971 | 0.002501813 | 0.165013113  | 0.138199403  | UXS1                  |
| chr3  | 15797850  | 15798041  | 192  | * | 2  | 1.40418E-09 | 0.000827087 | 0.008957953 | 0.001508809 | 0.162380933  | 0.127461186  | ANKRD28               |
| chr16 | 85603371  | 85603643  | 273  | * | 2  | 6.38634E-08 | 0.005993245 | 0.008958348 | 0.006421058 | -0.061954948 | -0.041005917 |                       |
| chr4  | 39172219  | 39172243  | 25   | * | 2  | 7.56555E-08 | 0.000899908 | 0.008959567 | 0.001615102 | -0.221893707 | -0.163598442 |                       |
| chr2  | 110084578 | 110084755 | 178  | * | 2  | 6.98611E-08 | 0.00173798  | 0.008961265 | 0.002698374 | 0.163104088  | 0.136805402  | SH3RF3                |
| chr14 | 39816220  | 39816502  | 283  | * | 2  | 2.04958E-08 | 0.000508582 | 0.008961945 | 0.001010503 | -0.149362089 | -0.04114883  | RP11-407N17.3, CTAGE5 |
| chr14 | 67655758  | 67656241  | 484  | * | 4  | 8.1359E-13  | 4.03889E-05 | 0.008968444 | 0.000159527 | 0.116832011  | 0.058936931  | FAM71D                |
| chr17 | 42425721  | 42426506  | 786  | * | 4  | 5.63147E-11 | 0.004975163 | 0.008972513 | 0.001215512 | -0.115296766 | -0.058038145 | GRN                   |
| chr22 | 39897580  | 39897884  | 305  | * | 3  | 6.32603E-11 | 0.01021847  | 0.008989151 | 0.006817396 | 0.14617891   | 0.064458755  | MIEF1                 |
| chr5  | 43313384  | 43314056  | 673  | * | 12 | 2.06427E-14 | 0.006901812 | 0.008998396 | 0.006062754 | -0.067526749 | -0.011157976 | HMGCS1                |
| chr2  | 177356020 | 177356448 | 429  | * | 3  | 7.11134E-10 | 0.019760087 | 0.009010424 | 0.003020258 | 0.120908924  | 0.069064556  |                       |
| chr14 | 61108227  | 61108807  | 581  | * | 3  | 8.02886E-10 | 0.001876302 | 0.009038668 | 0.002884192 | 0.114173501  | 0.072251475  | RP11-1042B17.5        |
| chr11 | 59951557  | 59952153  | 597  | * | 6  | 3.39626E-17 | 0.005969021 | 0.009062943 | 0.000468565 | -0.150484609 | -0.060132917 | MS4A6A                |
| chr12 | 57939823  | 57940980  | 1158 | * | 8  | 4.17693E-12 | 0.018380352 | 0.009081702 | 0.010040979 | -0.207023608 | -0.031020077 | DCTN2                 |
| chr2  | 239046879 | 239047774 | 896  | * | 8  | 5.73097E-14 | 0.034069454 | 0.009083281 | 0.003426045 | 0.185238252  | 0.04451238   | KLHL30                |
| chr18 | 51795309  | 51796014  | 706  | * | 10 | 7.62761E-10 | 0.33849279  | 0.009084949 | 0.057004303 | -0.060311155 | -0.008494189 | POLI                  |
| chr4  | 967094    | 967541    | 448  | * | 9  | 6.14562E-13 | 0.046148247 | 0.0090905   | 0.010514025 | -0.067711534 | -0.011697716 | DGKQ                  |
| chr16 | 67224199  | 67224839  | 641  | * | 5  | 5.35755E-10 | 0.080129373 | 0.009107353 | 0.006028294 | 0.139524935  | 0.061785509  |                       |
| chr3  | 197260526 | 197261031 | 506  | * | 2  | 3.97025E-08 | 0.000518807 | 0.009117096 | 0.001031355 | -0.170579572 | -0.132625927 | BDH1                  |
| chr16 | 1742281   | 1742458   | 178  | * | 2  | 3.27031E-08 | 0.00061783  | 0.009122675 | 0.001193361 | 0.141164702  | 0.110816249  | HN1L                  |
| chr7  | 116730466 | 116731139 | 674  | * | 6  | 9.82732E-12 | 0.013887796 | 0.009142146 | 0.003052041 | 0.158348902  | 0.031708297  | ST7, ST7-OT4, ST7-AS2 |
| chr15 | 98196234  | 98196333  | 100  | * | 3  | 4.09901E-08 | 0.018558416 | 0.00917121  | 0.013894818 | 0.086079991  | 0.077407068  |                       |
| chr2  | 199239878 | 199240201 | 324  | * | 4  | 3.75162E-10 | 0.004926271 | 0.009173516 | 0.001949716 | 0.191001806  | 0.097828389  | PLCL1                 |
| chr3  | 183414508 | 183415433 | 926  | * | 6  | 2.90006E-10 | 0.017031675 | 0.009180145 | 0.007818907 | 0.190497589  | 0.049992238  |                       |
| chr1  | 207277450 | 207277581 | 132  | * | 4  | 5.25818E-09 | 0.002921077 | 0.009181423 | 0.002183739 | -0.12071794  | -0.088465252 |                       |

|       |           |           |      |   |    |             |             |             |             |              |              |                      |
|-------|-----------|-----------|------|---|----|-------------|-------------|-------------|-------------|--------------|--------------|----------------------|
| chr20 | 2673604   | 2674697   | 1094 | * | 6  | 6.88839E-12 | 0.000562828 | 0.009194889 | 0.000446014 | 0.042474382  | 0.025376576  | EBF4                 |
| chr8  | 126320054 | 126320143 | 90   | * | 2  | 2.3632E-08  | 0.000466546 | 0.009194893 | 0.000944747 | -0.198942581 | -0.154481431 | NSMCE2               |
| chr3  | 121311783 | 121312383 | 601  | * | 6  | 2.38381E-12 | 0.000116181 | 0.009214191 | 0.000429568 | 0.148656016  | 0.099034015  | FBXO40               |
| chr15 | 76136129  | 76136475  | 347  | * | 4  | 8.80754E-12 | 0.00080804  | 0.009216148 | 0.000890119 | -0.033000808 | -0.000308604 | UBE2Q2               |
| chr11 | 12263722  | 12263892  | 171  | * | 3  | 3.00703E-08 | 0.00518132  | 0.009221528 | 0.00392416  | -0.232135324 | -0.111237801 | MICAL2               |
| chr3  | 187387555 | 187388737 | 1183 | * | 13 | 8.20468E-14 | 0.295012645 | 0.009236809 | 0.02862049  | 0.138555255  | 0.033099173  | SST                  |
| chr10 | 31288287  | 31288997  | 711  | * | 5  | 2.65527E-14 | 0.023945163 | 0.009248446 | 0.000944734 | -0.20075171  | -0.10734769  | ZNF438               |
| chr15 | 80443908  | 80445874  | 1967 | * | 14 | 2.63713E-14 | 0.004029126 | 0.009248967 | 0.000328258 | 0.147651058  | 0.02762303   | FAH                  |
| chr21 | 36281988  | 36282425  | 438  | * | 2  | 3.07649E-08 | 0.000456999 | 0.009251726 | 0.000929522 | -0.13163031  | -0.13108485  | RUNX1                |
| chr2  | 240196171 | 240197864 | 1694 | * | 7  | 1.21256E-20 | 2.11502E-05 | 0.009274208 | 4.93956E-06 | -0.212026482 | -0.101668118 | HDAC4                |
| chr12 | 124433888 | 124434452 | 565  | * | 4  | 6.34615E-11 | 0.00032195  | 0.009274601 | 0.000531545 | 0.187948546  | 0.103214607  | CCDC92               |
| chr4  | 95683604  | 95683637  | 34   | * | 2  | 2.67576E-08 | 0.000487345 | 0.009278061 | 0.000982076 | 0.113373357  | 0.107425218  | BMPR1B               |
| chr12 | 89749718  | 89749822  | 105  | * | 2  | 2.84626E-08 | 0.005506181 | 0.009279477 | 0.006173693 | 0.069813303  | 0.058088289  |                      |
| chr1  | 63249197  | 63249213  | 17   | * | 4  | 7.94227E-09 | 0.005828962 | 0.009297237 | 0.004574185 | 0.155918141  | 0.072615392  |                      |
| chr8  | 141354521 | 141354668 | 148  | * | 2  | 1.11354E-07 | 0.001074143 | 0.009320536 | 0.001880325 | 0.094812874  | 0.075900634  | TRAPPC9              |
| chr3  | 99790859  | 99790878  | 20   | * | 2  | 2.34059E-08 | 0.000462948 | 0.009322765 | 0.000941245 | -0.119866368 | -0.103670119 | CMSS1, FILIP1L       |
| chr22 | 29729206  | 29729347  | 142  | * | 4  | 4.83353E-12 | 0.000147926 | 0.009324484 | 0.000343531 | -0.116903401 | -0.062848018 | AP1B1, SNORD125      |
| chr6  | 4728383   | 4728467   | 85   | * | 2  | 1.84142E-07 | 0.001288408 | 0.0093357   | 0.002171142 | 0.126340004  | 0.098094301  | CDYL                 |
| chr19 | 2323913   | 2324957   | 1045 | * | 6  | 1.96723E-11 | 0.00066554  | 0.009340217 | 0.000646751 | 0.139418782  | 0.082120506  | LSM7                 |
| chr1  | 26616481  | 26616534  | 54   | * | 2  | 3.36707E-08 | 0.00077939  | 0.009366519 | 0.001453897 | -0.227674062 | -0.166637843 | UBXN11               |
| chr1  | 1092940   | 1093212   | 273  | * | 2  | 1.76042E-07 | 0.002419161 | 0.009376465 | 0.003503494 | -0.065524361 | -0.054185234 |                      |
| chr22 | 19949873  | 19950733  | 861  | * | 8  | 1.40557E-12 | 0.046079266 | 0.009380299 | 0.005732288 | 0.131343265  | 0.015925799  | COMT                 |
| chr16 | 89181807  | 89182492  | 686  | * | 7  | 1.29109E-11 | 0.003155001 | 0.009385295 | 0.002777365 | -0.069587608 | -0.023422047 | ACSF3                |
| chr1  | 87794525  | 87794589  | 65   | * | 2  | 5.31462E-08 | 0.021139288 | 0.009400835 | 0.013529836 | 0.021630321  | 0.01879128   | LMO4                 |
| chr3  | 52739927  | 52740483  | 557  | * | 10 | 7.68151E-09 | 0.678054591 | 0.009406248 | 0.263147159 | 0.020365029  | 0.002295009  | SPCS1, GLT8D1        |
| chr14 | 103822206 | 103822211 | 6    | * | 2  | 3.18796E-08 | 0.000771603 | 0.009425795 | 0.001444248 | 0.159973478  | 0.129328765  |                      |
| chr11 | 128563027 | 128564756 | 1730 | * | 11 | 1.56767E-23 | 1.79546E-05 | 0.009458502 | 4.37154E-06 | -0.094735804 | -0.022480587 | FLI1, SENCRC         |
| chr7  | 2609648   | 2609875   | 228  | * | 3  | 3.6527E-10  | 0.00148686  | 0.009459225 | 0.001699469 | 0.240279821  | 0.141509978  | IQCE                 |
| chr2  | 48755207  | 48757722  | 2516 | * | 16 | 8.78736E-14 | 0.00080974  | 0.009477997 | 0.000100369 | -0.20493134  | -0.006089899 | STON1, STON1-GTF2A1L |

|       |           |           |      |   |    |             |             |             |             |              |              |                                |
|-------|-----------|-----------|------|---|----|-------------|-------------|-------------|-------------|--------------|--------------|--------------------------------|
| chr14 | 61103439  | 61104571  | 1133 | * | 6  | 2.77188E-15 | 0.000420127 | 0.009482926 | 0.000141096 | 0.070603938  | 0.036618507  |                                |
| chr11 | 93465336  | 93466424  | 1089 | * | 5  | 3.777E-12   | 0.00921776  | 0.009496814 | 0.003675813 | -0.271185426 | -0.053463349 | TAF1D, SNORA8, SNORD5          |
| chr16 | 420490    | 420755    | 266  | * | 4  | 1.26883E-08 | 0.077413095 | 0.009502804 | 0.004226285 | -0.059450031 | -0.028995233 | MRPL28                         |
| chr8  | 91657390  | 91657772  | 383  | * | 2  | 1.42121E-09 | 0.000485711 | 0.009508569 | 0.000984301 | 0.043336151  | 0.030808298  | TMEM64                         |
| chr5  | 37208976  | 37209440  | 465  | * | 3  | 1.8598E-11  | 3.27044E-05 | 0.009510612 | 0.000123416 | -0.222607166 | -0.132136472 | C5orf42                        |
| chr6  | 170597494 | 170598912 | 1419 | * | 6  | 1.88122E-18 | 0.000864726 | 0.009514193 | 0.000159866 | 0.124077812  | 0.032372077  | DLL1                           |
| chr6  | 30636602  | 30636608  | 7    | * | 2  | 1.8489E-07  | 0.001242755 | 0.00952435  | 0.00212281  | 0.141118343  | 0.111279526  | DHX16                          |
| chr8  | 22435728  | 22437249  | 1522 | * | 15 | 1.2755E-21  | 0.001244665 | 0.009526676 | 0.000116173 | -0.132971254 | 0.00825006   | PDLIM2                         |
| chr14 | 64228585  | 64228599  | 15   | * | 2  | 3.38689E-08 | 0.000533567 | 0.009531939 | 0.001066105 | -0.190560866 | -0.181839918 |                                |
| chr19 | 53140973  | 53141372  | 400  | * | 2  | 2.65441E-10 | 0.006435436 | 0.009532778 | 0.006910799 | 0.013634012  | 0.010818764  | ZNF83                          |
| chr12 | 7168012   | 7168545   | 534  | * | 4  | 1.68605E-13 | 0.004725461 | 0.009538531 | 0.000793464 | 0.178987669  | 0.097669472  | C1S                            |
| chr1  | 51702423  | 51702659  | 237  | * | 2  | 1.54992E-08 | 0.018390774 | 0.00954555  | 0.012719637 | 0.017799903  | 0.011864593  | RNF11                          |
| chr6  | 109280380 | 109280598 | 219  | * | 3  | 1.62654E-08 | 0.013431142 | 0.009545863 | 0.003738672 | -0.184402705 | -0.087445909 | ARMC2                          |
| chr3  | 172241791 | 172241975 | 185  | * | 2  | 7.11895E-08 | 0.007568029 | 0.009566961 | 0.007668468 | -0.180355965 | -0.103596735 |                                |
| chr11 | 75826133  | 75826760  | 628  | * | 4  | 2.82346E-11 | 0.00010745  | 0.009569968 | 0.000252837 | 0.12379175   | 0.084289974  | UVRAG                          |
| chr19 | 16629806  | 16630140  | 335  | * | 4  | 8.23694E-08 | 0.019590766 | 0.009573352 | 0.006564088 | 0.122897407  | 0.042936026  | C19orf44, CTD-3222D19.2, CHERP |
| chr12 | 6874709   | 6874964   | 256  | * | 2  | 2.43646E-08 | 0.001493602 | 0.009574661 | 0.002453716 | 0.068240731  | 0.063670802  | PTMS, MLF2                     |
| chr17 | 5389134   | 5390301   | 1168 | * | 19 | 1.95783E-22 | 0.000279819 | 0.009579832 | 0.000211651 | -0.086404564 | -0.010171183 | MIS12, DERL2                   |
| chr6  | 58778937  | 58779139  | 203  | * | 3  | 2.84464E-11 | 3.63469E-05 | 0.009584397 | 0.000135477 | 0.105533391  | 0.082527961  |                                |
| chr22 | 26908008  | 26908989  | 982  | * | 17 | 3.47351E-11 | 0.378854414 | 0.009585392 | 0.167172639 | 0.046258644  | -0.003254515 | CTA-445C9.14, TFIP11           |
| chr12 | 6880611   | 6881629   | 1019 | * | 9  | 4.33065E-13 | 0.043652836 | 0.009592081 | 0.006878284 | -0.16684745  | -0.041686291 |                                |
| chr16 | 25226421  | 25227013  | 593  | * | 5  | 2.01378E-12 | 0.008361141 | 0.009595769 | 0.000389878 | 0.125005869  | 0.017307017  |                                |
| chr10 | 74079772  | 74080805  | 1034 | * | 5  | 2.61858E-10 | 0.000824223 | 0.009597085 | 0.000349235 | -0.070971967 | -0.014603963 |                                |
| chr5  | 58335804  | 58336072  | 269  | * | 4  | 9.84921E-09 | 0.031046135 | 0.009608381 | 0.021072745 | -0.119816161 | -0.035680137 | RP11-266N13.2, PDE4D           |
| chr7  | 136641675 | 136641740 | 66   | * | 2  | 2.54253E-08 | 0.000465816 | 0.009614768 | 0.00095215  | -0.221476305 | -0.170748528 | CHRM2, hsa-mir-490             |
| chr11 | 628318    | 628677    | 360  | * | 3  | 5.65659E-11 | 0.010095797 | 0.009622585 | 0.002820024 | 0.15123824   | 0.077808993  |                                |
| chr2  | 224808641 | 224809074 | 434  | * | 3  | 5.3496E-09  | 0.013130028 | 0.009632044 | 0.004100101 | -0.148382662 | -0.067688629 | WDFY1                          |
| chr7  | 1084162   | 1084791   | 630  | * | 5  | 4.94235E-09 | 0.113863341 | 0.0096397   | 0.018925167 | 0.041158535  | 0.007776108  | GPR146, C7orf50                |
| chr1  | 36348216  | 36349271  | 1056 | * | 11 | 5.28062E-18 | 2.07287E-05 | 0.009640923 | 4.90426E-05 | 0.143371285  | 0.032320318  | AGO1                           |

|       |           |           |      |   |    |             |             |             |             |              |              |                    |
|-------|-----------|-----------|------|---|----|-------------|-------------|-------------|-------------|--------------|--------------|--------------------|
| chr10 | 134258421 | 134258819 | 399  | * | 3  | 4.18031E-09 | 0.000837142 | 0.009644656 | 0.001026666 | -0.120841026 | -0.074400557 | C10orf91           |
| chr12 | 124875481 | 124876101 | 621  | * | 3  | 2.22755E-10 | 0.000788223 | 0.009647197 | 0.001590957 | -0.081210032 | -0.046036688 | NCOR2              |
| chr20 | 1246093   | 1246779   | 687  | * | 7  | 2.23471E-16 | 0.037474435 | 0.009658908 | 0.002374188 | 0.136333863  | 0.04342573   | RAD21L1            |
| chr10 | 134454161 | 134454481 | 321  | * | 3  | 4.0148E-09  | 0.002541875 | 0.009667908 | 0.001740035 | 0.102807779  | 0.06742111   | INPP5A             |
| chr11 | 74303296  | 74304091  | 796  | * | 10 | 6.82451E-12 | 0.043970306 | 0.009674567 | 0.012482974 | 0.030163463  | 0.000312074  | POLD3              |
| chr17 | 48736189  | 48736199  | 11   | * | 2  | 4.69115E-08 | 0.000949544 | 0.009675362 | 0.001720687 | 0.148282016  | 0.111177108  | ABCC3              |
| chr9  | 100459634 | 100459861 | 228  | * | 4  | 2.57131E-08 | 0.095969874 | 0.009681998 | 0.014397814 | 0.042422054  | 0.005281378  | XPA                |
| chr17 | 179551    | 179611    | 61   | * | 2  | 1.74985E-07 | 0.009615687 | 0.009682763 | 0.008926575 | -0.14411433  | -0.085055955 | RPH3AL             |
| chr10 | 102509510 | 102510568 | 1059 | * | 5  | 8.10854E-11 | 0.000139481 | 0.009685287 | 0.000318963 | 0.07809283   | 0.054729619  | PAX2               |
| chr3  | 32822789  | 32823185  | 397  | * | 3  | 2.50938E-09 | 0.002007712 | 0.009686281 | 0.002788223 | -0.085878748 | -0.021300342 |                    |
| chr12 | 11911896  | 11912232  | 337  | * | 3  | 3.60496E-10 | 0.000634555 | 0.009698479 | 0.001379007 | 0.169600014  | 0.122922799  | ETV6               |
| chr4  | 2934188   | 2934614   | 427  | * | 2  | 5.31771E-10 | 0.001122109 | 0.009698967 | 0.001968138 | -0.190775445 | -0.172606738 | MFSD10             |
| chr17 | 7083015   | 7083064   | 50   | * | 2  | 1.36532E-07 | 0.000474026 | 0.00970899  | 0.000968301 | -0.134343792 | -0.124349001 |                    |
| chr9  | 123630545 | 123630782 | 238  | * | 2  | 1.07924E-09 | 0.001077143 | 0.00971838  | 0.00190609  | 0.127949797  | 0.033816316  | PHF19              |
| chr12 | 122984780 | 122985592 | 813  | * | 10 | 1.00645E-11 | 0.008556726 | 0.009744292 | 0.011880013 | 0.027492196  | 0.001502772  | ZCCHC8             |
| chr22 | 46507241  | 46508604  | 1364 | * | 8  | 1.43506E-17 | 1.20687E-05 | 0.009758774 | 8.79157E-06 | 0.174172427  | 0.097606274  | FLJ27365           |
| chr12 | 69725435  | 69725444  | 10   | * | 2  | 1.4138E-07  | 0.000665641 | 0.009771796 | 0.001289661 | -0.172201168 | -0.137409931 |                    |
| chr17 | 79202120  | 79202505  | 386  | * | 5  | 2.63785E-10 | 0.04385455  | 0.009771841 | 0.005770592 | -0.163541781 | -0.070511872 | ENTHD2             |
| chr1  | 1310123   | 1310496   | 374  | * | 4  | 7.14759E-11 | 0.024753533 | 0.009778008 | 0.00932951  | -0.063223136 | -0.018136539 | AURKAIP1           |
| chr22 | 50979643  | 50979665  | 23   | * | 2  | 1.27006E-08 | 0.001305721 | 0.009791489 | 0.002224372 | -0.199167195 | -0.191770607 |                    |
| chr1  | 28878155  | 28880147  | 1993 | * | 13 | 1.34115E-19 | 1.22484E-05 | 0.009791519 | 7.3349E-06  | 0.087699131  | -0.00080135  | TRNAU1AP           |
| chr19 | 3961086   | 3962194   | 1109 | * | 13 | 6.76643E-13 | 0.154882779 | 0.009794595 | 0.028224163 | 0.144819414  | 0.034018018  | DAPK3, MIR637      |
| chr17 | 6927329   | 6927424   | 96   | * | 2  | 7.86657E-09 | 0.002453577 | 0.009797548 | 0.00359459  | 0.140031178  | 0.116078669  | BCL6B              |
| chr14 | 65169664  | 65170728  | 1065 | * | 7  | 3.05424E-12 | 0.011632985 | 0.009804538 | 0.010453332 | -0.075457585 | -0.007641563 |                    |
| chr7  | 96632635  | 96633060  | 426  | * | 4  | 1.92205E-08 | 0.190456067 | 0.009820027 | 0.029134739 | 0.05143642   | 0.023664569  | DLX6-AS1           |
| chr17 | 73042519  | 73043736  | 1218 | * | 13 | 1.91347E-12 | 0.204008163 | 0.009827041 | 0.029764348 | -0.06769751  | -0.007575858 | KCTD2, ATP5H       |
| chr1  | 117284260 | 117284802 | 543  | * | 7  | 1.32325E-08 | 0.146883    | 0.00983201  | 0.025639416 | -0.030613665 | -0.000942812 | NEFHP1             |
| chr17 | 8868480   | 8870355   | 1876 | * | 15 | 1.9532E-17  | 0.000672691 | 0.009840172 | 0.000160656 | -0.28961963  | -0.02017912  | CTB-41I6.1, PIK3R5 |
| chr1  | 173836636 | 173838081 | 1446 | * | 24 | 4.32601E-19 | 0.015129571 | 0.009850929 | 0.00233915  | -0.067815717 | -0.003813251 | ZBTB37, GAS5       |

|       |           |           |      |   |    |             |             |             |             |              |              |                              |
|-------|-----------|-----------|------|---|----|-------------|-------------|-------------|-------------|--------------|--------------|------------------------------|
| chr17 | 76371406  | 76371879  | 474  | * | 3  | 1.03479E-09 | 0.000297107 | 0.009857777 | 0.000689876 | -0.151097202 | -0.082564115 |                              |
| chr17 | 38171455  | 38171697  | 243  | * | 5  | 2.60025E-12 | 0.00176723  | 0.009865371 | 0.000814364 | -0.15474918  | -0.091957415 | CSF3                         |
| chr8  | 124193667 | 124194847 | 1181 | * | 11 | 2.37234E-18 | 0.013553537 | 0.009865874 | 0.000467959 | 0.155323792  | 0.036637262  | FAM83A, RP11-539E17.5        |
| chr5  | 87973899  | 87974547  | 649  | * | 8  | 1.70908E-14 | 0.000663007 | 0.009872892 | 0.001004591 | 0.073104322  | 0.041643043  | CTC-467M3.1, LINC00461       |
| chr2  | 71114785  | 71115994  | 1210 | * | 9  | 6.0292E-14  | 0.317881302 | 0.009881408 | 0.015188091 | 0.043598311  | 0.015348712  | LINC01143                    |
| chr1  | 226896665 | 226897499 | 835  | * | 4  | 1.82819E-13 | 1.50766E-05 | 0.009898914 | 7.63705E-05 | 0.19919599   | 0.130623087  | ITPKB                        |
| chr14 | 23845870  | 23847052  | 1183 | * | 8  | 2.49108E-16 | 0.084141424 | 0.009904042 | 0.002664097 | 0.153408173  | 0.061971594  | CMTM5                        |
| chr2  | 131850237 | 131850909 | 673  | * | 5  | 9.32559E-10 | 0.347384087 | 0.00991626  | 0.06705947  | 0.016527731  | -0.00159426  | FAM168B                      |
| chr11 | 82746478  | 82746732  | 255  | * | 3  | 7.97314E-09 | 0.034829012 | 0.009919532 | 0.003888571 | 0.115818852  | 0.075970721  | RP11-659G9.3, RAB30          |
| chr15 | 43802612  | 43803877  | 1266 | * | 15 | 2.53981E-16 | 0.028722529 | 0.009962161 | 0.002658698 | -0.03494127  | 0.006491509  | MAP1A, TP53BP1               |
| chr20 | 824609    | 825268    | 660  | * | 8  | 1.14848E-18 | 0.017590634 | 0.009963507 | 0.000906666 | 0.155877562  | 0.050325566  | FAM110A                      |
| chr11 | 76493379  | 76493489  | 111  | * | 2  | 1.194E-07   | 0.425688696 | 0.009976521 | 0.031285657 | -0.132990597 | -0.066530356 | TSKU                         |
| chr10 | 121485184 | 121485763 | 580  | * | 3  | 5.98093E-09 | 0.011668927 | 0.009981858 | 0.010143928 | 0.039271401  | 0.015225546  | INPP5F                       |
| chr15 | 55610624  | 55610640  | 17   | * | 2  | 1.10876E-10 | 0.000715574 | 0.009982272 | 0.001376085 | -0.062224409 | -0.049048334 | RAB27A, RP11-139H15.1        |
| chr12 | 110136015 | 110136044 | 30   | * | 3  | 9.46398E-10 | 0.000237925 | 0.010000082 | 0.000544147 | 0.16758871   | 0.133708024  |                              |
| chr12 | 4917740   | 4918391   | 652  | * | 8  | 1.3613E-11  | 0.028781369 | 0.010005617 | 0.01011354  | -0.082793539 | -0.022222515 | GALNT8, KCNA6, RP11-234B24.4 |
| chr12 | 12937632  | 12938465  | 834  | * | 8  | 7.93963E-17 | 0.000105442 | 0.010020797 | 8.84869E-05 | 0.209011776  | 0.090493567  | APOLD1                       |
| chr7  | 138916732 | 138917062 | 331  | * | 3  | 7.16666E-08 | 0.011654941 | 0.0100418   | 0.010896847 | 0.019599106  | 0.012721502  | UBN2                         |
| chr20 | 54966092  | 54967718  | 1627 | * | 19 | 1.65931E-23 | 0.001025473 | 0.010041916 | 3.35565E-05 | -0.127634612 | -0.01019733  | CSTF1, AURKA                 |
| chr16 | 88557453  | 88558237  | 785  | * | 5  | 5.75581E-13 | 0.013546342 | 0.010045774 | 0.00213717  | 0.20553994   | 0.086228231  | ZFPM1                        |
| chr6  | 151203416 | 151203458 | 43   | * | 2  | 3.30339E-08 | 0.000508626 | 0.010075414 | 0.001035755 | 0.164503217  | 0.144059991  | MTHFD1L                      |
| chr19 | 5903868   | 5905215   | 1348 | * | 17 | 1.64472E-15 | 0.136373782 | 0.010078833 | 0.011053452 | 0.040497838  | 0.001823105  | AC104532.2, VMAC, NDUFA11    |
| chr17 | 7791319   | 7792134   | 816  | * | 6  | 1.06236E-09 | 0.627416659 | 0.010083637 | 0.038381524 | -0.147387296 | -0.009900929 | CHD3                         |
| chr12 | 77456884  | 77456902  | 19   | * | 2  | 3.6855E-08  | 0.000535918 | 0.010098617 | 0.00108316  | 0.105304815  | 0.09698907   | E2F7                         |
| chr8  | 82191575  | 82192945  | 1371 | * | 14 | 1.66893E-13 | 0.017619252 | 0.010105734 | 0.013751127 | -0.31658714  | -0.036698294 | FABP5, RP11-363E6.3          |
| chr2  | 113544177 | 113545053 | 877  | * | 5  | 1.56953E-08 | 0.030496241 | 0.010119826 | 0.003897487 | 0.146846753  | 0.009304834  |                              |
| chr16 | 81129991  | 81130802  | 812  | * | 9  | 1.44495E-08 | 0.194222337 | 0.01012956  | 0.070948117 | -0.062864093 | -0.008249119 | GCSH                         |
| chr16 | 81684572  | 81684618  | 47   | * | 2  | 9.67321E-09 | 0.00051748  | 0.010148916 | 0.001052591 | 0.165481686  | 0.142762086  | CMIP                         |
| chr6  | 14518881  | 14518907  | 27   | * | 2  | 1.22477E-08 | 0.00052004  | 0.010160508 | 0.001057253 | 0.155180175  | 0.144584766  |                              |

|       |           |           |      |   |    |             |             |             |             |              |              |                                     |
|-------|-----------|-----------|------|---|----|-------------|-------------|-------------|-------------|--------------|--------------|-------------------------------------|
| chr14 | 50802227  | 50802253  | 27   | * | 2  | 1.0504E-08  | 0.000517904 | 0.010175614 | 0.001053888 | 0.16974399   | 0.153769079  | ATP5S, CDKL1                        |
| chr12 | 108079287 | 108079950 | 664  | * | 13 | 1.24492E-09 | 0.344121751 | 0.010176919 | 0.120862464 | 0.022266972  | 0.003269677  | PWP1                                |
| chr1  | 89521035  | 89521065  | 31   | * | 3  | 1.26566E-08 | 0.005927109 | 0.010188188 | 0.002542068 | 0.09561914   | 0.054562536  | GBP1                                |
| chr12 | 56349110  | 56349394  | 285  | * | 4  | 7.45437E-09 | 0.049190571 | 0.010195894 | 0.008012408 | 0.144750003  | 0.069866546  | PMEL                                |
| chr19 | 52004630  | 52005651  | 1022 | * | 9  | 2.03971E-14 | 0.060551595 | 0.010205238 | 0.004029271 | -0.091887647 | -0.027363855 | SIGLEC12                            |
| chr1  | 25290947  | 25292412  | 1466 | * | 16 | 1.19994E-17 | 0.013637795 | 0.010219603 | 0.004320632 | 0.141638673  | 0.048257304  | RUNX3                               |
| chr19 | 1465060   | 1466162   | 1103 | * | 5  | 6.47506E-14 | 0.004509451 | 0.010220194 | 0.000690737 | 0.189836711  | 0.077949303  | APC2, C19orf25                      |
| chr3  | 112329157 | 112329355 | 199  | * | 2  | 4.21446E-08 | 0.000576748 | 0.010229816 | 0.001155542 | -0.171206356 | -0.05487827  | CCDC80                              |
| chr2  | 241458886 | 241460002 | 1117 | * | 7  | 1.46768E-18 | 5.96038E-08 | 0.010230847 | 8.76841E-07 | 0.206609197  | 0.113399908  | ANKMY1                              |
| chr5  | 88119579  | 88119740  | 162  | * | 4  | 1.99429E-13 | 1.63116E-05 | 0.010233163 | 7.08181E-05 | -0.271831956 | -0.148912442 | MEF2C                               |
| chr11 | 67372519  | 67374847  | 2329 | * | 20 | 5.52629E-19 | 0.000247114 | 0.010236514 | 0.000225293 | 0.193601763  | 0.028463823  | RP11-655M14.12, NDUFV1,<br>C11orf72 |
| chr16 | 1578619   | 1578807   | 189  | * | 3  | 1.49129E-10 | 0.00097916  | 0.010255836 | 0.001305941 | 0.146216031  | 0.127452108  | TMEM204, IFT140                     |
| chr1  | 201123225 | 201124117 | 893  | * | 13 | 3.30141E-17 | 0.000567039 | 0.010265189 | 0.000651869 | -0.081352291 | -0.027006471 | TMEM9                               |
| chr11 | 33758505  | 33759043  | 539  | * | 3  | 7.47193E-10 | 0.196012987 | 0.010269818 | 0.047277772 | 0.152094965  | 0.065362927  |                                     |
| chr1  | 144995682 | 144996395 | 714  | * | 5  | 6.58548E-12 | 0.135062825 | 0.01029123  | 0.009399349 | 0.155442094  | 0.059033793  | PDE4DIP                             |
| chr22 | 29950244  | 29950274  | 31   | * | 2  | 9.70577E-08 | 0.109966077 | 0.010294928 | 0.02677901  | 0.107055758  | 0.047750257  | THOC5                               |
| chr16 | 31141403  | 31142148  | 746  | * | 3  | 1.12954E-12 | 5.43033E-05 | 0.010305203 | 0.000192055 | -0.087121862 | -0.072059479 | KAT8                                |
| chr10 | 134095646 | 134095998 | 353  | * | 3  | 5.90737E-08 | 0.023884487 | 0.010313268 | 0.01515624  | -0.10640679  | -0.007730172 | STK32C                              |
| chr14 | 76045663  | 76046018  | 356  | * | 2  | 1.9254E-08  | 0.052969601 | 0.010323578 | 0.021398228 | -0.117534472 | -0.067519284 | FLVCR2, AC007182.6                  |
| chr5  | 54527320  | 54527671  | 352  | * | 3  | 8.10301E-11 | 0.003085515 | 0.010337191 | 0.001859297 | 0.041338205  | 0.037456468  | CCNO                                |
| chr18 | 77169782  | 77170635  | 854  | * | 6  | 4.79062E-09 | 0.043218074 | 0.010357181 | 0.024478532 | 0.134157798  | 0.001750732  | NFATC1                              |
| chr11 | 9595544   | 9596475   | 932  | * | 8  | 7.77215E-11 | 0.010290906 | 0.01036061  | 0.014790254 | 0.017881715  | 0.01019952   | WEE1                                |
| chr13 | 112770729 | 112770897 | 169  | * | 3  | 2.16737E-08 | 0.003916517 | 0.01037485  | 0.005312379 | -0.216641241 | -0.050870427 |                                     |
| chr14 | 69415588  | 69416134  | 547  | * | 2  | 1.14258E-07 | 0.000538126 | 0.010381644 | 0.001093154 | 0.108912169  | 0.108427017  | ACTN1                               |
| chr20 | 61282847  | 61283288  | 442  | * | 2  | 2.06719E-08 | 0.000810484 | 0.010394671 | 0.001539621 | -0.168388698 | -0.122481966 | SLCO4A1                             |
| chr13 | 52367810  | 52368291  | 482  | * | 3  | 2.84338E-08 | 0.002868648 | 0.010396375 | 0.001955221 | -0.107138352 | -0.061089138 | DHRS12                              |
| chr22 | 21921060  | 21922038  | 979  | * | 10 | 1.27507E-11 | 0.064906501 | 0.010408755 | 0.009671255 | -0.091812826 | 0.000461865  | UBE2L3                              |
| chr2  | 169102866 | 169103738 | 873  | * | 4  | 3.33813E-09 | 0.007916191 | 0.010449811 | 0.007676286 | 0.029714726  | 0.017121968  | STK39                               |
| chr15 | 91458121  | 91460071  | 1951 | * | 9  | 5.44765E-20 | 1.45659E-05 | 0.010462484 | 5.32074E-06 | -0.248406926 | -0.101667563 | MAN2A2                              |

|       |           |           |      |   |    |             |             |             |             |              |              |                                           |
|-------|-----------|-----------|------|---|----|-------------|-------------|-------------|-------------|--------------|--------------|-------------------------------------------|
| chr6  | 109288488 | 109288592 | 105  | * | 2  | 5.68413E-08 | 0.000832683 | 0.010473182 | 0.001577049 | -0.059403265 | -0.05078783  | ARMC2                                     |
| chr7  | 4778839   | 4779342   | 504  | * | 6  | 2.62626E-10 | 0.017580593 | 0.010478347 | 0.005241068 | 0.238154176  | 0.072763829  | FOXK1                                     |
| chr1  | 37947276  | 37947371  | 96   | * | 2  | 4.22006E-08 | 0.000558745 | 0.010497827 | 0.001131117 | -0.192775032 | -0.147376945 | ZC3H12A                                   |
| chr4  | 2733908   | 2733970   | 63   | * | 2  | 1.21908E-07 | 0.000551685 | 0.010501055 | 0.001119075 | -0.154498722 | -0.128508394 | FAM193A                                   |
| chr19 | 55013549  | 55013954  | 406  | * | 6  | 1.43574E-11 | 0.00658842  | 0.010509884 | 0.002432022 | -0.190156329 | -0.105880549 | LAIR2                                     |
| chr2  | 113569828 | 113570123 | 296  | * | 3  | 3.34667E-10 | 0.000243746 | 0.010517136 | 0.000551088 | 0.153305092  | 0.112156251  |                                           |
| chr12 | 132515664 | 132515752 | 89   | * | 2  | 9.97919E-08 | 0.002305793 | 0.010525064 | 0.003517286 | 0.091172212  | 0.081090174  | EP400                                     |
| chr5  | 134375057 | 134377058 | 2002 | * | 11 | 6.0359E-20  | 3.37563E-06 | 0.010527071 | 6.12636E-06 | -0.107220471 | 0.030706962  | C5orf66, CTC-276P9.1                      |
| chr8  | 641466    | 641497    | 32   | * | 3  | 2.66943E-09 | 0.000432555 | 0.010535385 | 0.00101314  | 0.220192745  | 0.13297027   | ERICH1                                    |
| chr8  | 20880199  | 20880673  | 475  | * | 4  | 1.28101E-10 | 0.000934961 | 0.010536747 | 0.001455165 | 0.146753279  | 0.083506877  |                                           |
| chr12 | 118810436 | 118810441 | 6    | * | 2  | 1.07845E-08 | 0.000571857 | 0.010544197 | 0.001154583 | -0.067962826 | -0.060292699 | TAOK3                                     |
| chr3  | 71084623  | 71084634  | 12   | * | 2  | 4.25925E-08 | 0.00055525  | 0.010544253 | 0.001126147 | -0.157034826 | -0.153136121 | FOXP1                                     |
| chr22 | 24178181  | 24179356  | 1176 | * | 5  | 1.85154E-08 | 0.002641678 | 0.010547198 | 0.00150649  | 0.148237642  | 0.06400803   | DERL3                                     |
| chr14 | 21058360  | 21058768  | 409  | * | 4  | 1.58029E-10 | 0.110680369 | 0.010552808 | 0.006998512 | -0.245532213 | -0.097377084 | RP11-14J7.6, RNASE11, RNASE11,<br>RNASE12 |
| chr1  | 28471208  | 28471395  | 188  | * | 2  | 7.04227E-08 | 0.001398435 | 0.010555685 | 0.002398459 | -0.147542748 | -0.053689261 |                                           |
| chr2  | 42588233  | 42588967  | 735  | * | 14 | 7.54814E-17 | 0.001528666 | 0.010557763 | 0.00117379  | -0.042837981 | -0.012436897 | COX7A2L                                   |
| chr1  | 156595164 | 156595461 | 298  | * | 3  | 3.0808E-09  | 0.00978962  | 0.010564241 | 0.009894764 | 0.055424902  | 0.013916083  | HAPLN2                                    |
| chr17 | 42989137  | 42989323  | 187  | * | 3  | 8.94551E-08 | 0.134752942 | 0.010568308 | 0.010228611 | 0.137773739  | 0.069831365  | GFAP                                      |
| chr7  | 116138462 | 116138591 | 130  | * | 2  | 1.43395E-10 | 0.00113308  | 0.010569254 | 0.002029952 | 0.134837309  | 0.110914409  | CAV2, AC002066.1                          |
| chr3  | 47014128  | 47014492  | 365  | * | 2  | 2.73843E-08 | 0.000590126 | 0.010570053 | 0.001186266 | 0.171913367  | 0.13893344   | CCDC12                                    |
| chr12 | 57118908  | 57119835  | 928  | * | 15 | 8.02977E-20 | 0.072543759 | 0.010571312 | 0.001946231 | 0.096618404  | 0.008228336  | NACA                                      |
| chr7  | 99006392  | 99007560  | 1169 | * | 10 | 3.38878E-11 | 0.21973954  | 0.010600894 | 0.01403488  | -0.108093488 | -0.006360135 | BUD31, PDAP1                              |
| chr1  | 234914480 | 234915028 | 549  | * | 2  | 1.14333E-07 | 0.00057212  | 0.010605314 | 0.001156419 | -0.110166878 | -0.004397751 |                                           |
| chr17 | 70710154  | 70711001  | 848  | * | 5  | 4.50468E-12 | 0.009152329 | 0.010605547 | 0.001494992 | -0.286369393 | -0.098705654 | SLC39A11, AC080037.1                      |
| chr17 | 74099707  | 74100277  | 571  | * | 15 | 5.71786E-11 | 0.416383074 | 0.010614174 | 0.082592257 | -0.303611642 | -0.031905884 | EXOC7                                     |
| chr16 | 72088241  | 72088622  | 382  | * | 3  | 4.18444E-12 | 8.46631E-05 | 0.010627603 | 0.000274323 | -0.190726437 | -0.142481738 | HP, HPR, TXNL4B                           |
| chr6  | 106582669 | 106583218 | 550  | * | 4  | 2.13998E-10 | 0.000938522 | 0.010630083 | 0.001728881 | 0.105124098  | 0.070167239  |                                           |
| chr11 | 70268504  | 70269613  | 1110 | * | 5  | 1.87708E-10 | 0.001528447 | 0.010667465 | 0.000316487 | 0.130931501  | 0.062463745  | CTTN                                      |
| chr14 | 25042782  | 25043625  | 844  | * | 3  | 2.44977E-08 | 0.000783411 | 0.010667555 | 0.0013986   | -0.161169688 | -0.107369934 | CTSG                                      |

|       |           |           |      |   |    |             |             |             |             |              |              |                      |
|-------|-----------|-----------|------|---|----|-------------|-------------|-------------|-------------|--------------|--------------|----------------------|
| chr3  | 196527614 | 196528060 | 447  | * | 3  | 6.5009E-09  | 0.003435851 | 0.010681075 | 0.002118091 | 0.125056471  | 0.069419573  | PAK2                 |
| chr22 | 18390778  | 18390828  | 51   | * | 2  | 3.56855E-09 | 0.000825922 | 0.010700925 | 0.001574534 | -0.120617375 | -0.099634386 | MICAL3               |
| chr6  | 29598417  | 29600206  | 1790 | * | 19 | 5.33978E-33 | 0.000143823 | 0.010709284 | 6.82563E-06 | 0.221145087  | 0.047112078  | GABBR1               |
| chr17 | 41002433  | 41002900  | 468  | * | 2  | 1.29155E-09 | 0.000587662 | 0.010711538 | 0.001185378 | 0.101676901  | 0.094589661  | AOC2                 |
| chr12 | 57081186  | 57081572  | 387  | * | 3  | 1.87934E-08 | 0.006703058 | 0.010716507 | 0.006134827 | -0.046638206 | -0.010423306 | PTGES3               |
| chr1  | 150487740 | 150488444 | 705  | * | 6  | 1.13089E-09 | 0.063075172 | 0.010719482 | 0.016099463 | 0.029076574  | 0.005036859  | LINC00568            |
| chr9  | 128509729 | 128509870 | 142  | * | 4  | 1.03133E-09 | 0.023107351 | 0.010720199 | 0.00539169  | 0.021900161  | 0.00989585   | PBX3                 |
| chr19 | 34662636  | 34663206  | 571  | * | 10 | 1.3659E-15  | 0.10231876  | 0.010732322 | 0.008321711 | 0.098187726  | 0.014660869  |                      |
| chr2  | 219773416 | 219773473 | 58   | * | 2  | 1.28788E-07 | 0.003384327 | 0.010732464 | 0.004689334 | 0.134243965  | 0.096940213  | AC073128.10          |
| chr12 | 124908112 | 124908931 | 820  | * | 7  | 2.72998E-14 | 0.000231822 | 0.010732957 | 0.000452591 | 0.155304338  | 0.057591614  | NCOR2                |
| chr19 | 11449933  | 11450645  | 713  | * | 8  | 8.33653E-13 | 0.001213928 | 0.010733295 | 0.001639181 | 0.059594595  | 0.014682739  | RAB3D                |
| chr6  | 36253157  | 36253720  | 564  | * | 2  | 7.77013E-09 | 0.011858384 | 0.010740935 | 0.010637631 | 0.137217266  | 0.084494099  | PNPLA1               |
| chr16 | 85981336  | 85981947  | 612  | * | 5  | 2.52823E-09 | 0.002187276 | 0.010744743 | 0.002930854 | -0.202271025 | -0.023045878 |                      |
| chr2  | 28582676  | 28584004  | 1329 | * | 4  | 6.80527E-12 | 1.72893E-05 | 0.010768291 | 8.16848E-05 | 0.218155025  | -0.029417405 |                      |
| chr11 | 10715175  | 10716164  | 990  | * | 14 | 3.23248E-16 | 0.000980107 | 0.010782454 | 0.000719686 | 0.188377279  | 0.076759687  | MRV1                 |
| chr8  | 42195726  | 42196371  | 646  | * | 7  | 1.25057E-09 | 0.05259535  | 0.010791478 | 0.024610584 | 0.022253343  | 0.003576623  | POLB                 |
| chr10 | 76585791  | 76586650  | 860  | * | 10 | 1.26273E-18 | 7.10431E-05 | 0.010798738 | 9.7014E-05  | -0.087720884 | -0.013937976 | KAT6B                |
| chr12 | 13132534  | 13133131  | 598  | * | 7  | 2.28356E-13 | 0.015752556 | 0.010801085 | 0.003657917 | 0.113478235  | 0.041837591  | RP11-392P7.6, HEBP1  |
| chr1  | 27480106  | 27480849  | 744  | * | 5  | 8.28581E-14 | 6.57918E-05 | 0.010806157 | 0.000179783 | 0.146506397  | 0.095722514  | SLC9A1               |
| chr2  | 97454042  | 97454334  | 293  | * | 5  | 1.22372E-11 | 0.001297369 | 0.010807809 | 0.000768743 | 0.157556241  | 0.09394251   | CNNM4                |
| chr10 | 5275884   | 5276318   | 435  | * | 4  | 2.65515E-09 | 0.002069799 | 0.010810517 | 0.002975728 | -0.170442687 | -0.087287828 |                      |
| chr11 | 67777664  | 67777952  | 289  | * | 6  | 3.28886E-08 | 0.430653021 | 0.010816023 | 0.031243014 | -0.124331945 | -0.013059687 | ALDH3B1              |
| chr12 | 81102486  | 81102749  | 264  | * | 3  | 2.77959E-09 | 0.005445724 | 0.010818268 | 0.003343999 | -0.071771539 | -0.005433434 | MYF6                 |
| chr13 | 21750473  | 21751373  | 901  | * | 10 | 6.38905E-11 | 0.136118257 | 0.01082379  | 0.046887651 | -0.047686209 | 0.00053851   | MRP63, SKA3          |
| chr11 | 61334859  | 61335600  | 742  | * | 5  | 2.98115E-10 | 0.014916127 | 0.010840268 | 0.004060326 | 0.094679766  | 0.04397593   | SYT7                 |
| chr14 | 91162832  | 91163190  | 359  | * | 2  | 6.27897E-08 | 0.01006354  | 0.010842625 | 0.009693651 | 0.152810682  | 0.040720276  | TTC7B                |
| chr17 | 56604947  | 56606542  | 1596 | * | 6  | 6.25257E-13 | 8.64645E-05 | 0.010842776 | 0.000122614 | 0.178414101  | 0.106372088  | RP11-112H10.4, SEPT4 |
| chr1  | 154164951 | 154164994 | 44   | * | 2  | 9.77902E-08 | 0.004773939 | 0.010846596 | 0.005990897 | -0.184707193 | -0.119307668 | TPM3                 |
| chr10 | 75541506  | 75541698  | 193  | * | 5  | 3.24984E-09 | 0.012674544 | 0.010847659 | 0.005695473 | 0.025324387  | 0.012335237  |                      |



|       |           |           |      |   |    |             |             |             |             |              |              |                     |
|-------|-----------|-----------|------|---|----|-------------|-------------|-------------|-------------|--------------|--------------|---------------------|
| chr20 | 61315208  | 61315831  | 624  | * | 3  | 1.76204E-10 | 0.001385905 | 0.010865831 | 0.001548831 | -0.248396629 | -0.118464843 | SLCO4A1             |
| chr3  | 4943647   | 4944056   | 410  | * | 2  | 6.86039E-08 | 0.000591631 | 0.010866374 | 0.001195706 | 0.085727417  | 0.071187173  | BHLHE40-AS1         |
| chr12 | 4140624   | 4141193   | 570  | * | 5  | 5.60414E-09 | 0.020165495 | 0.010888018 | 0.003940066 | -0.089179852 | -0.007668862 |                     |
| chr14 | 70826572  | 70827442  | 871  | * | 6  | 2.99042E-15 | 0.003669327 | 0.010889762 | 0.001396701 | -0.160058778 | -0.067566735 | SYNJ2BP-COX16       |
| chr8  | 130691264 | 130691356 | 93   | * | 2  | 4.43219E-08 | 0.000627963 | 0.010895173 | 0.001258096 | 0.147112096  | 0.035306652  | CCDC26              |
| chr9  | 132401827 | 132402804 | 978  | * | 5  | 4.33641E-11 | 0.003202902 | 0.010903018 | 0.001101436 | -0.196512397 | -0.069377724 | RP11-483H20.4, ASB6 |
| chr3  | 12800802  | 12801712  | 911  | * | 8  | 6.88208E-17 | 0.002606761 | 0.010903376 | 0.00021293  | 0.165649565  | 0.071760101  | TMEM40              |
| chr7  | 2287330   | 2287495   | 166  | * | 2  | 1.22606E-08 | 0.00062325  | 0.010906784 | 0.001250415 | 0.167082073  | 0.15416855   | NUDT1               |
| chr1  | 236229267 | 236229607 | 341  | * | 2  | 1.21402E-08 | 0.007150594 | 0.01092717  | 0.007859549 | 0.186183708  | 0.139530104  |                     |
| chr4  | 159593054 | 159593775 | 722  | * | 15 | 1.35217E-10 | 0.195510656 | 0.010929895 | 0.072580957 | -0.037273604 | -0.002205162 | ETFDH, C4orf46      |
| chr3  | 44157590  | 44157927  | 338  | * | 2  | 4.95576E-08 | 0.000697917 | 0.010930172 | 0.001375691 | 0.097712775  | 0.089582792  |                     |
| chr12 | 49177075  | 49177153  | 79   | * | 2  | 1.62384E-08 | 0.004681376 | 0.010942932 | 0.005931989 | 0.120540944  | 0.104262752  | ADCY6               |
| chr11 | 334251    | 334833    | 583  | * | 6  | 7.14871E-13 | 0.027977877 | 0.010946965 | 0.001651213 | -0.15002365  | -0.055118609 |                     |
| chr1  | 112032288 | 112032495 | 208  | * | 2  | 1.58045E-08 | 0.000802736 | 0.010956677 | 0.001546439 | -0.131716334 | -0.101509423 | ADORA3              |
| chr6  | 157912969 | 157913024 | 56   | * | 2  | 7.04727E-08 | 0.000689195 | 0.010970407 | 0.001362384 | -0.157114524 | -0.135316855 | ZDHHC14             |
| chr11 | 17229115  | 17230914  | 1800 | * | 9  | 1.82152E-10 | 0.006466683 | 0.010976014 | 0.001644305 | -0.10706959  | -0.012446346 | NUCB2, PIK3C2A      |
| chr11 | 914329    | 915440    | 1112 | * | 12 | 7.51122E-21 | 0.000573733 | 0.010977591 | 5.70301E-05 | 0.152276032  | 0.064644532  | CHID1               |
| chr3  | 187454786 | 187455953 | 1168 | * | 7  | 3.31907E-12 | 0.01147233  | 0.010979319 | 0.003393191 | -0.199897426 | -0.011173488 | BCL6                |
| chr12 | 122287619 | 122288010 | 392  | * | 6  | 9.68645E-16 | 5.68441E-05 | 0.010979963 | 4.33044E-05 | -0.246019361 | -0.162884669 | HPD                 |
| chr13 | 114855198 | 114855429 | 232  | * | 2  | 2.52151E-08 | 0.00064596  | 0.010983257 | 0.001290593 | 0.223845612  | 0.146877498  | RASA3               |
| chr1  | 15735965  | 15736719  | 755  | * | 9  | 3.34398E-09 | 0.235094199 | 0.010987674 | 0.057735032 | -0.044807512 | -0.003486622 | EFHD2               |
| chr10 | 45948576  | 45949022  | 447  | * | 5  | 2.83052E-09 | 0.038883559 | 0.010996521 | 0.008316107 | -0.23306796  | -0.094152307 |                     |
| chr1  | 27216367  | 27217013  | 647  | * | 12 | 2.81787E-10 | 0.406047823 | 0.011012598 | 0.078352532 | 0.023119169  | -0.004058071 | GPN2, GPATCH3       |
| chr6  | 74354232  | 74354305  | 74   | * | 3  | 7.40553E-08 | 0.003760612 | 0.011016891 | 0.004756296 | -0.157039337 | -0.084978221 | SLC17A5             |
| chr14 | 35885253  | 35885344  | 92   | * | 2  | 7.04872E-08 | 0.001557174 | 0.011020644 | 0.002642042 | 0.08425614   | 0.075992443  |                     |
| chr7  | 101559134 | 101560291 | 1158 | * | 11 | 5.04144E-15 | 0.070947964 | 0.011024991 | 0.001553382 | 0.181080602  | 0.051144356  | CUX1                |
| chr2  | 219923682 | 219924408 | 727  | * | 5  | 1.60233E-11 | 0.015884769 | 0.011025515 | 0.003050003 | 0.074248403  | 0.042635483  | IHH                 |
| chr1  | 42234586  | 42234721  | 136  | * | 2  | 5.4363E-08  | 0.000603708 | 0.011028324 | 0.001220055 | -0.101794619 | -0.090792048 | HIVEP3              |
| chr19 | 49976438  | 49976497  | 60   | * | 2  | 4.78388E-12 | 0.000604323 | 0.011028629 | 0.001221114 | 0.143727144  | 0.132772096  | CTD-3148I10.9       |

|       |           |           |      |   |    |             |             |             |             |              |              |                                 |
|-------|-----------|-----------|------|---|----|-------------|-------------|-------------|-------------|--------------|--------------|---------------------------------|
| chr18 | 43620112  | 43620428  | 317  | * | 2  | 9.42749E-09 | 0.000833892 | 0.011045963 | 0.001598932 | 0.129374226  | 0.120849923  | PSTPIP2                         |
| chr18 | 157716    | 158838    | 1123 | * | 11 | 2.90981E-11 | 0.148797973 | 0.011047646 | 0.02687453  | -0.098711754 | -0.007321108 | USP14                           |
| chr14 | 101146259 | 101146675 | 417  | * | 4  | 5.00737E-10 | 0.000378115 | 0.011053507 | 0.000878263 | 0.238944879  | 0.127848474  |                                 |
| chr19 | 55549414  | 55550348  | 935  | * | 11 | 2.51076E-23 | 2.29888E-06 | 0.011063931 | 2.2977E-06  | 0.174160918  | 0.098971459  | CTC-550B14.7, GP6, CTC-550B14.6 |
| chr22 | 41939981  | 41941494  | 1514 | * | 15 | 4.79708E-25 | 7.91049E-06 | 0.011070028 | 5.33932E-06 | -0.077944692 | -0.019564917 | POLR3H                          |
| chr7  | 647622    | 647637    | 16   | * | 2  | 1.75141E-07 | 0.001091682 | 0.011072302 | 0.001994019 | 0.108538529  | 0.105714343  | AC147651.4, PRKAR1B             |
| chr19 | 10679308  | 10680229  | 922  | * | 11 | 1.15887E-15 | 0.000316627 | 0.011072892 | 0.00039443  | 0.044273239  | -0.000936979 | CDKN2D                          |
| chr17 | 74844962  | 74845143  | 182  | * | 3  | 8.78194E-09 | 0.000650519 | 0.011081035 | 0.00147168  | 0.143190016  | 0.105623844  |                                 |
| chr17 | 34222748  | 34223153  | 406  | * | 2  | 7.82056E-08 | 0.000610373 | 0.01109248  | 0.001232919 | -0.180500592 | -0.130243575 | AC015849.16                     |
| chr9  | 139924651 | 139924709 | 59   | * | 2  | 2.42409E-10 | 0.000649689 | 0.011108023 | 0.001299983 | -0.122972561 | -0.102862103 | C9orf139, FUT7                  |
| chr2  | 106054990 | 106055507 | 518  | * | 7  | 6.63803E-15 | 0.007858054 | 0.01111983  | 0.000970247 | 0.202190578  | 0.060678295  |                                 |
| chr17 | 37775764  | 37775851  | 88   | * | 3  | 8.71539E-10 | 0.02465478  | 0.011122658 | 0.0030777   | -0.212957469 | -0.112041531 |                                 |
| chr11 | 92500085  | 92500136  | 52   | * | 2  | 3.67737E-08 | 0.00082627  | 0.011135335 | 0.001589815 | -0.228153756 | -0.149607402 | FAT3                            |
| chr1  | 212965581 | 212966209 | 629  | * | 4  | 1.47181E-11 | 0.006403099 | 0.011138044 | 0.00718803  | 0.184573005  | 0.050411746  | TATDN3                          |
| chr10 | 90640622  | 90640720  | 99   | * | 2  | 2.3981E-08  | 0.007296263 | 0.01114514  | 0.00803244  | -0.023090767 | -0.003042747 | STAMBPL1                        |
| chr5  | 482407    | 482948    | 542  | * | 2  | 2.26981E-08 | 0.02733567  | 0.011148613 | 0.016948631 | 0.155523308  | 0.070625636  | SLC9A3                          |
| chr2  | 58656064  | 58656105  | 42   | * | 2  | 1.50574E-10 | 0.000757018 | 0.011150866 | 0.001478833 | 0.018100576  | 0.013536322  | LINC01122                       |
| chr9  | 139258402 | 139258524 | 123  | * | 5  | 1.7477E-07  | 0.210482592 | 0.011155945 | 0.013712056 | 0.030725886  | 0.016103709  | CARD9                           |
| chr18 | 47003170  | 47003177  | 8    | * | 2  | 1.13472E-07 | 0.000855382 | 0.011163081 | 0.00163692  | -0.065009283 | -0.059809118 |                                 |
| chr22 | 32146690  | 32146705  | 16   | * | 2  | 2.41725E-09 | 0.000937661 | 0.011174845 | 0.001765822 | 0.133384967  | 0.107941399  |                                 |
| chr19 | 4276778   | 4277656   | 879  | * | 4  | 1.53259E-09 | 0.006721021 | 0.01119672  | 0.002678148 | 0.146632492  | 0.075557021  |                                 |
| chr3  | 12199836  | 12200427  | 592  | * | 4  | 1.87593E-08 | 0.033873249 | 0.011203777 | 0.019568528 | -0.243618482 | -0.013346703 | SYN2, TIMP4                     |
| chr13 | 25085301  | 25086777  | 1477 | * | 6  | 5.62918E-09 | 0.000237553 | 0.011214792 | 0.000227281 | -0.144555667 | -0.052429434 | TPTE2P6, PARP4                  |
| chr9  | 79328522  | 79328644  | 123  | * | 2  | 1.8355E-07  | 0.001111766 | 0.011222277 | 0.002030621 | 0.11173201   | 0.106470923  | PRUNE2                          |
| chr4  | 102267366 | 102269374 | 2009 | * | 15 | 3.69769E-17 | 0.00654663  | 0.011227526 | 0.000265238 | -0.191679797 | -0.024206529 | AP001816.1, PPP3CA              |
| chr4  | 86850108  | 86850721  | 614  | * | 4  | 9.85521E-12 | 0.003989303 | 0.011236073 | 0.00176555  | -0.16142204  | -0.067525117 | ARHGAP24                        |
| chr8  | 19674470  | 19675432  | 963  | * | 13 | 1.81192E-12 | 0.101763448 | 0.011240337 | 0.025856681 | -0.044652568 | -0.004534546 | INTS10                          |
| chr8  | 126443767 | 126443772 | 6    | * | 2  | 1.00977E-07 | 0.059702852 | 0.011266378 | 0.02371326  | 0.014160867  | 0.008312857  | TRIB1                           |
| chr3  | 155422092 | 155423168 | 1077 | * | 7  | 1.17732E-10 | 0.001495435 | 0.01129898  | 0.001295667 | -0.128383873 | -0.061951617 | PLCH1                           |

|       |           |           |      |   |    |             |             |             |             |              |              |                               |
|-------|-----------|-----------|------|---|----|-------------|-------------|-------------|-------------|--------------|--------------|-------------------------------|
| chr2  | 89035483  | 89035504  | 22   | * | 2  | 6.46566E-08 | 0.000646352 | 0.011307777 | 0.001299235 | 0.163292737  | 0.15983235   | RPIA                          |
| chr11 | 61722539  | 61722937  | 399  | * | 4  | 1.23182E-08 | 0.032233741 | 0.011315533 | 0.008969908 | -0.184214195 | -0.0553625   | BEST1                         |
| chr15 | 75248496  | 75249380  | 885  | * | 7  | 7.03699E-12 | 0.010029048 | 0.011315794 | 0.005284606 | 0.060815757  | 0.014554934  | RPP25                         |
| chr5  | 112042650 | 112043716 | 1067 | * | 14 | 7.08992E-18 | 0.001489144 | 0.011322384 | 0.00041838  | 0.125028569  | 0.029459674  | APC                           |
| chr4  | 90228685  | 90229039  | 355  | * | 5  | 1.15657E-07 | 0.067599749 | 0.01132673  | 0.025566341 | 0.022902042  | 0.011029021  | GPRIN3                        |
| chr20 | 47443694  | 47444241  | 548  | * | 3  | 9.50619E-10 | 0.002331382 | 0.011331512 | 0.003684714 | -0.054332393 | -0.000878147 | PREX1                         |
| chr12 | 111016163 | 111016566 | 404  | * | 2  | 4.2048E-08  | 0.000658486 | 0.011335515 | 0.001320455 | -0.110190407 | -0.109487481 | PPTC7                         |
| chr6  | 38325960  | 38326204  | 245  | * | 2  | 3.94273E-08 | 0.000801185 | 0.011341838 | 0.001556231 | 0.120439353  | 0.09454885   | BTBD9                         |
| chr2  | 25565215  | 25565841  | 627  | * | 13 | 7.08872E-13 | 0.140251815 | 0.011344966 | 0.01605206  | 0.058568199  | -0.004804363 | DNMT3A                        |
| chr2  | 10182878  | 10184650  | 1773 | * | 19 | 2.06822E-18 | 0.002368402 | 0.011348196 | 0.000815638 | 0.116852702  | 0.006820992  | KLF11                         |
| chr17 | 684490    | 685509    | 1020 | * | 12 | 1.47654E-15 | 0.001425451 | 0.011358683 | 0.001760982 | 0.179197888  | 0.019087412  | GLOD4                         |
| chr4  | 1686288   | 1687333   | 1046 | * | 6  | 6.88566E-11 | 0.03622223  | 0.011361819 | 0.007508283 | -0.06314095  | -0.019902543 |                               |
| chr2  | 30369105  | 30370399  | 1295 | * | 13 | 3.70529E-20 | 0.002325228 | 0.011362733 | 0.000188977 | -0.063709216 | -0.018984208 | YPEL5                         |
| chr1  | 224370155 | 224371490 | 1336 | * | 13 | 1.57444E-13 | 0.024472226 | 0.011363516 | 0.011910331 | -0.300936973 | -0.025916452 | DEGS1                         |
| chr14 | 93672722  | 93673792  | 1071 | * | 11 | 1.47933E-18 | 4.18722E-06 | 0.01136553  | 1.9416E-05  | -0.183431063 | -0.024950175 | RP11-371E8.4, UBR7, C14orf142 |
| chr11 | 457742    | 458052    | 311  | * | 2  | 9.17218E-11 | 0.000739154 | 0.011375006 | 0.001456076 | 0.12852766   | 0.118580275  | PTDSS2                        |
| chr2  | 157184816 | 157184978 | 163  | * | 3  | 5.34874E-09 | 0.016757217 | 0.011390186 | 0.006806977 | -0.217325942 | -0.138233952 | NR4A2                         |
| chr5  | 80596198  | 80597291  | 1094 | * | 7  | 5.48746E-15 | 0.000442334 | 0.011403895 | 0.000316246 | -0.248010226 | -0.032777205 | CKMT2-AS1                     |
| chr6  | 133035150 | 133035379 | 230  | * | 4  | 2.66448E-08 | 0.036845931 | 0.011405862 | 0.009924118 | -0.194936848 | -0.069509627 | VNN1                          |
| chr1  | 26348325  | 26348484  | 160  | * | 2  | 1.50954E-08 | 0.001094143 | 0.011406516 | 0.00201284  | 0.129554276  | 0.104651466  | EXTL1                         |
| chr1  | 7913067   | 7914017   | 951  | * | 9  | 1.16582E-23 | 4.53892E-08 | 0.011418351 | 3.98186E-07 | 0.141136972  | 0.094494774  | UTS2                          |
| chr6  | 135602552 | 135602559 | 8    | * | 2  | 6.93154E-08 | 0.000662602 | 0.01141918  | 0.001329472 | -0.129060484 | -0.122715838 |                               |
| chr12 | 54656228  | 54656343  | 116  | * | 2  | 4.90773E-08 | 0.000643791 | 0.011423202 | 0.001297644 | -0.1097136   | -0.098858822 | CBX5                          |
| chr2  | 86667850  | 86669446  | 1597 | * | 18 | 2.05614E-14 | 0.021698637 | 0.011431039 | 0.003702518 | -0.041806824 | -0.005447072 | KDM3A                         |
| chr3  | 32463113  | 32464005  | 893  | * | 3  | 5.70626E-10 | 0.00027348  | 0.011440096 | 0.000638696 | -0.178850205 | -0.111848377 | CMTM7                         |
| chr17 | 16118138  | 16118251  | 114  | * | 2  | 5.84223E-09 | 0.001379613 | 0.011449113 | 0.002427218 | 0.030478617  | 0.022992014  | NCOR1                         |
| chr21 | 43823604  | 43824262  | 659  | * | 10 | 6.48246E-19 | 2.43759E-06 | 0.011451944 | 1.47866E-05 | 0.276688069  | 0.108713786  | UBASH3A                       |
| chr2  | 118981748 | 118982679 | 932  | * | 8  | 1.1898E-13  | 0.00090732  | 0.0114526   | 0.001424517 | 0.053356615  | 0.010536659  |                               |
| chr17 | 47286445  | 47287974  | 1530 | * | 14 | 5.3505E-17  | 0.001084311 | 0.011453584 | 0.000378982 | 0.145458409  | 0.042086218  | ABI3, GNGT2                   |

|       |           |           |      |   |    |             |             |             |             |              |              |                         |
|-------|-----------|-----------|------|---|----|-------------|-------------|-------------|-------------|--------------|--------------|-------------------------|
| chr17 | 80376872  | 80376884  | 13   | * | 2  | 2.53112E-08 | 0.003031669 | 0.011457946 | 0.004432942 | 0.020352729  | 0.000205243  | HEXDC                   |
| chr8  | 41654331  | 41656940  | 2610 | * | 14 | 5.0495E-13  | 1.90315E-05 | 0.011463672 | 1.03111E-05 | -0.188586832 | 0.040136376  | ANK1                    |
| chr1  | 11795409  | 11796573  | 1165 | * | 14 | 9.51593E-21 | 0.002178105 | 0.01147021  | 0.000153988 | -0.206293049 | -0.039144427 | AGTRAP                  |
| chr6  | 31547704  | 31550241  | 2538 | * | 32 | 8.08473E-25 | 3.41524E-06 | 0.011475457 | 2.44702E-06 | 0.219580864  | 0.022871609  | LTB                     |
| chr14 | 55594613  | 55595320  | 708  | * | 3  | 5.70197E-11 | 0.000566392 | 0.011484161 | 0.001176487 | -0.205711404 | -0.166622632 | LGALS3                  |
| chr8  | 8930709   | 8930785   | 77   | * | 2  | 1.72562E-08 | 0.001143722 | 0.011510493 | 0.00209123  | 0.108628071  | 0.106887872  | ERI1                    |
| chr5  | 59188112  | 59189724  | 1613 | * | 8  | 2.32066E-12 | 0.000126487 | 0.011526302 | 0.000333547 | 0.122589571  | 0.049173292  | PDE4D                   |
| chr1  | 26855423  | 26855926  | 504  | * | 5  | 1.76581E-08 | 0.144608194 | 0.011532032 | 0.049626504 | -0.126654942 | -0.026581109 |                         |
| chr4  | 144436129 | 144436344 | 216  | * | 3  | 3.72965E-09 | 0.010497945 | 0.011533357 | 0.006543639 | 0.168262843  | 0.093557579  | SMARCA5                 |
| chr1  | 40532772  | 40532873  | 102  | * | 2  | 6.73088E-08 | 0.001938398 | 0.011538709 | 0.003174726 | -0.138075694 | -0.045713549 | CAP1                    |
| chr20 | 55967503  | 55968294  | 792  | * | 5  | 8.59109E-12 | 0.000496795 | 0.011570394 | 0.000491854 | 0.185147829  | 0.109179081  | RBM38, RP4-800J21.3     |
| chr2  | 27593896  | 27594150  | 255  | * | 4  | 7.62092E-11 | 0.057070944 | 0.011595251 | 0.009939528 | 0.02118395   | 0.009482365  | SNX17                   |
| chr8  | 119124103 | 119124790 | 688  | * | 4  | 7.33864E-12 | 0.000430227 | 0.011595803 | 0.001065809 | -0.230812797 | -0.055148284 |                         |
| chr2  | 62080815  | 62081471  | 657  | * | 8  | 1.39902E-10 | 0.014032663 | 0.011607685 | 0.015388892 | 0.02909794   | -0.000596627 | FAM161A                 |
| chr10 | 131567980 | 131568379 | 400  | * | 4  | 1.29901E-08 | 0.096665162 | 0.011639639 | 0.006131743 | -0.184285694 | -0.077360111 |                         |
| chr6  | 23177275  | 23178052  | 778  | * | 5  | 3.39143E-09 | 0.028566959 | 0.011648142 | 0.002594242 | 0.166571339  | 0.08886101   |                         |
| chr6  | 11737639  | 11737776  | 138  | * | 2  | 1.09375E-07 | 0.023768421 | 0.011655318 | 0.016236974 | 0.134231436  | 0.063358972  | ADTRP                   |
| chr2  | 28617552  | 28618402  | 851  | * | 7  | 2.75635E-13 | 9.48587E-05 | 0.011660837 | 0.000227795 | -0.105429189 | -0.047566089 | FOSL2                   |
| chr17 | 56437800  | 56437930  | 131  | * | 2  | 1.04799E-07 | 0.00080979  | 0.011679616 | 0.001580569 | 0.112320636  | 0.097767581  | BZRAP1-AS1, RNF43       |
| chr5  | 95159127  | 95159639  | 513  | * | 5  | 4.02538E-12 | 0.005735392 | 0.011680707 | 0.002411456 | -0.192880084 | -0.062712143 | RHOBTB3                 |
| chr12 | 8129632   | 8130007   | 376  | * | 2  | 3.44501E-08 | 0.00068804  | 0.01169937  | 0.001379409 | -0.14211768  | -0.021730625 |                         |
| chr20 | 45179226  | 45179413  | 188  | * | 5  | 9.42086E-13 | 5.28316E-05 | 0.011699539 | 0.000236201 | -0.143785241 | -0.076716282 |                         |
| chr15 | 100048210 | 100048500 | 291  | * | 4  | 1.24129E-08 | 0.002782803 | 0.011699609 | 0.004479538 | 0.179516618  | 0.091552939  | MEF2A                   |
| chr20 | 3190112   | 3190600   | 489  | * | 5  | 1.37646E-12 | 0.009792982 | 0.01170031  | 0.004244182 | -0.038805276 | 0.000902038  | ITPA                    |
| chr14 | 21152498  | 21153451  | 954  | * | 8  | 3.71053E-15 | 0.05087367  | 0.011701619 | 0.010210149 | -0.1914659   | -0.036997336 | RNASE4, ANG, AL163636.6 |
| chr10 | 114133235 | 114134550 | 1316 | * | 8  | 1.36929E-18 | 5.2013E-05  | 0.011707616 | 9.30671E-06 | 0.152188626  | 0.009923442  | ACSL5                   |
| chr16 | 87736388  | 87737549  | 1162 | * | 6  | 1.25641E-14 | 0.00279598  | 0.011709808 | 0.000556997 | -0.164924775 | -0.084763057 | KLHDC4, FLJ00104        |
| chr1  | 90456081  | 90456818  | 738  | * | 3  | 2.29872E-08 | 0.001779181 | 0.011711801 | 0.001941763 | 0.126859817  | 0.088577019  |                         |
| chr8  | 103252525 | 103252842 | 318  | * | 2  | 3.91478E-09 | 0.002296451 | 0.011732383 | 0.003632573 | -0.119672189 | -0.079554389 | KB-431C1.4              |

|       |           |           |      |   |    |             |             |             |             |              |              |                           |
|-------|-----------|-----------|------|---|----|-------------|-------------|-------------|-------------|--------------|--------------|---------------------------|
| chr1  | 42500967  | 42501967  | 1001 | * | 7  | 6.67914E-12 | 0.0013405   | 0.011734642 | 0.000984341 | 0.035408253  | 0.00952566   | HIVEP3                    |
| chr20 | 61427684  | 61428215  | 532  | * | 8  | 2.35186E-11 | 0.122065282 | 0.011748971 | 0.014999591 | -0.061906644 | -0.02421067  | MRGBP                     |
| chr2  | 44395262  | 44396058  | 797  | * | 8  | 5.04684E-15 | 0.000410729 | 0.011753209 | 0.000321093 | -0.055548121 | -0.0254432   | PPM1B, RP11-559M23.1      |
| chr16 | 1521617   | 1522109   | 493  | * | 4  | 2.96889E-10 | 0.000813333 | 0.011760906 | 0.001131467 | -0.115403551 | -0.075192846 | CLCN7, LA16c-390E6.3      |
| chr14 | 103494686 | 103494823 | 138  | * | 2  | 7.83571E-08 | 0.000688595 | 0.011776852 | 0.001382271 | -0.131827399 | -0.000510981 | CDC42BPB                  |
| chr13 | 34184663  | 34185311  | 649  | * | 8  | 1.43274E-13 | 0.027355104 | 0.011780404 | 0.0026134   | 0.117154179  | 0.034305707  | RP11-37L2.1, RP11-141M1.3 |
| chr11 | 126872615 | 126873181 | 567  | * | 6  | 4.02707E-10 | 0.045697151 | 0.011795231 | 0.011017204 | -0.146184188 | -0.053668813 | KIRREL3-AS3, KIRREL3      |
| chr7  | 143088472 | 143089459 | 988  | * | 7  | 2.24593E-18 | 7.58397E-08 | 0.011827701 | 1.01414E-06 | 0.172955005  | 0.112873238  | EPHA1                     |
| chr14 | 105390934 | 105391118 | 185  | * | 4  | 5.23608E-08 | 0.014367302 | 0.011837875 | 0.006220967 | -0.164579512 | -0.086223042 |                           |
| chr11 | 32913903  | 32913998  | 96   | * | 3  | 3.76658E-10 | 0.02418309  | 0.011859169 | 0.004432157 | 0.024412253  | 0.016179353  |                           |
| chr17 | 1479213   | 1479834   | 622  | * | 2  | 8.12018E-08 | 0.000878236 | 0.011865798 | 0.001696883 | -0.145393182 | -0.119919809 | SLC43A2                   |
| chr2  | 85919996  | 85922172  | 2177 | * | 10 | 8.1609E-12  | 0.008190094 | 0.011868605 | 7.55906E-05 | -0.184757915 | 0.02409209   | GNLY                      |
| chr16 | 67270593  | 67271014  | 422  | * | 4  | 1.49447E-11 | 0.00053345  | 0.011870488 | 0.000843923 | 0.144621791  | 0.045272382  | FHOD1                     |
| chr20 | 43588633  | 43590115  | 1483 | * | 13 | 1.25035E-13 | 0.000101918 | 0.011879207 | 8.81437E-05 | 0.207107377  | 0.022404538  | TOMM34                    |
| chr14 | 74181035  | 74181552  | 518  | * | 5  | 2.19565E-09 | 0.017047511 | 0.011894156 | 0.010803751 | 0.038374138  | 0.01567067   | PNMA1                     |
| chr7  | 4872926   | 4873549   | 624  | * | 5  | 1.53517E-09 | 0.065628825 | 0.011894899 | 0.008932945 | 0.092301733  | 0.047247727  | RADIL                     |
| chr7  | 23052972  | 23054418  | 1447 | * | 13 | 1.81598E-16 | 0.036847146 | 0.011898123 | 0.001878985 | -0.11044712  | -0.021829596 | FAM126A                   |
| chr15 | 90357202  | 90357521  | 320  | * | 2  | 1.29725E-08 | 0.004990632 | 0.011899342 | 0.006409035 | -0.122719016 | -0.074209838 | ANPEP                     |
| chr14 | 73602718  | 73603844  | 1127 | * | 17 | 1.70831E-13 | 0.071350125 | 0.011916646 | 0.031989813 | 0.064743669  | -0.001951785 | PSEN1                     |
| chr8  | 61565814  | 61566439  | 626  | * | 7  | 8.83044E-13 | 0.024297051 | 0.011916806 | 0.00463206  | 0.02081998   | 0.009131681  | RP11-91I20.2              |
| chr4  | 84049907  | 84050796  | 890  | * | 3  | 3.16965E-10 | 0.000107925 | 0.011919847 | 0.000348709 | -0.146364075 | -0.097726702 | PLAC8                     |
| chr5  | 42951711  | 42952369  | 659  | * | 4  | 1.14181E-12 | 5.82879E-05 | 0.011957319 | 0.000204942 | 0.07332904   | 0.058599564  |                           |
| chr2  | 97523237  | 97523931  | 695  | * | 10 | 1.69481E-12 | 0.077810437 | 0.011959057 | 0.008432216 | -0.065262709 | -0.006306089 | ANKRD23, ANKRD39          |
| chr4  | 6919718   | 6920113   | 396  | * | 3  | 6.77018E-11 | 0.000119844 | 0.01196008  | 0.000387968 | -0.122970742 | -0.079753257 | TBC1D14                   |
| chr4  | 3390813   | 3391495   | 683  | * | 5  | 8.45419E-09 | 0.03364922  | 0.011998514 | 0.017336001 | 0.096988498  | 0.006653459  | RGS12                     |
| chr5  | 1113320   | 1113627   | 308  | * | 5  | 2.11513E-14 | 0.000151871 | 0.012006501 | 0.000205785 | -0.161545277 | -0.081963219 |                           |
| chr7  | 100860016 | 100861373 | 1358 | * | 16 | 5.64683E-13 | 0.052507393 | 0.01201781  | 0.039460486 | -0.054722745 | -0.00452364  | ZNHIT1, PLOD3             |
| chr3  | 148708091 | 148709111 | 1021 | * | 7  | 1.26056E-14 | 0.003970718 | 0.012023213 | 0.001133452 | -0.144567456 | -0.046658248 |                           |
| chr11 | 64490494  | 64490871  | 378  | * | 8  | 2.1037E-08  | 0.344829414 | 0.012047861 | 0.052621791 | 0.028261312  | 0.006028424  | NRXN2                     |

|       |           |           |      |   |    |             |             |             |             |              |              |                           |
|-------|-----------|-----------|------|---|----|-------------|-------------|-------------|-------------|--------------|--------------|---------------------------|
| chr2  | 231067424 | 231068246 | 823  | * | 6  | 3.46452E-10 | 0.137851336 | 0.012051822 | 0.011413288 | -0.240873279 | -0.064009583 | SP140, SP110              |
| chr5  | 132112449 | 132113201 | 753  | * | 14 | 9.40779E-11 | 0.83853038  | 0.012053375 | 0.255115533 | 0.03010628   | 0.005238569  | SEPT8                     |
| chr12 | 56981517  | 56982283  | 767  | * | 5  | 3.82852E-12 | 6.58157E-05 | 0.012064306 | 0.000253611 | 0.151557967  | 0.007716688  | RBMS2                     |
| chr12 | 58160843  | 58160989  | 147  | * | 3  | 7.14062E-08 | 0.070791432 | 0.012065027 | 0.023427001 | -0.145820237 | -0.034993247 | CYP27B1                   |
| chr13 | 33001751  | 33002464  | 714  | * | 11 | 2.29653E-10 | 0.041127668 | 0.012084889 | 0.028159523 | -0.065935043 | -0.009369532 | N4BP2L1, RP11-298P3.4     |
| chr8  | 27219512  | 27219812  | 301  | * | 2  | 1.13499E-07 | 0.000918037 | 0.012108502 | 0.001768574 | -0.13437276  | -0.025331873 | PTK2B                     |
| chr10 | 43633258  | 43634212  | 955  | * | 9  | 1.70806E-11 | 0.031721194 | 0.012121234 | 0.013256032 | 0.016034131  | 0.004970598  | CSGALNACT2, RP11-351D16.3 |
| chr4  | 185377809 | 185378132 | 324  | * | 3  | 2.52449E-10 | 0.001398696 | 0.012136704 | 0.001644635 | 0.131226245  | 0.082361617  | IRF2                      |
| chr9  | 73216095  | 73216478  | 384  | * | 3  | 4.84432E-10 | 0.000116612 | 0.01215609  | 0.000381136 | 0.143419567  | 0.121111588  | TRPM3                     |
| chr3  | 151986340 | 151987978 | 1639 | * | 17 | 1.21716E-17 | 0.027387828 | 0.012165219 | 0.002824809 | 0.023464106  | 0.002186048  | MBNL1, MBNL1-AS1          |
| chr11 | 65658459  | 65659772  | 1314 | * | 5  | 2.10752E-11 | 0.002844636 | 0.012165924 | 0.001002338 | 0.122519004  | 0.04050543   | CCDC85B, FOSL1            |
| chr1  | 235667507 | 235668421 | 915  | * | 10 | 3.08977E-09 | 0.038191453 | 0.012175719 | 0.026391716 | -0.034780983 | -0.006457039 | B3GALNT2                  |
| chr14 | 93170710  | 93171393  | 684  | * | 4  | 3.21283E-10 | 0.00068068  | 0.012186501 | 0.001125454 | -0.198502915 | -0.036175928 | LGMN                      |
| chr11 | 9335544   | 9336845   | 1302 | * | 18 | 1.66987E-17 | 0.01377154  | 0.012187816 | 0.00305124  | -0.058862985 | -0.006015372 | TMEM41B                   |
| chr17 | 4166847   | 4168654   | 1808 | * | 16 | 3.45678E-24 | 0.000440105 | 0.012188671 | 4.97802E-05 | 0.123465887  | 0.006268905  | ANKFY1                    |
| chr2  | 97202143  | 97202475  | 333  | * | 7  | 2.24731E-09 | 0.070167541 | 0.012195969 | 0.0209998   | 0.049535422  | 0.002891478  |                           |
| chr6  | 24774713  | 24775047  | 335  | * | 5  | 2.1087E-09  | 0.019521681 | 0.01219948  | 0.01085234  | -0.074592624 | -0.01879506  |                           |
| chr11 | 74173518  | 74173933  | 416  | * | 3  | 1.07297E-08 | 0.003866842 | 0.012217424 | 0.004429343 | -0.277235909 | -0.12353314  | RP11-702H23.4, KCNE3      |
| chr10 | 13569995  | 13571273  | 1279 | * | 11 | 1.67284E-16 | 0.003674971 | 0.01222235  | 0.000771183 | 0.044710119  | 0.008204962  | RP11-214D15.2, BEND7      |
| chr6  | 108882119 | 108882205 | 87   | * | 3  | 4.91017E-08 | 0.001368043 | 0.01222764  | 0.002672576 | -0.140301884 | -0.052263679 | FOXO3                     |
| chr10 | 115438867 | 115439884 | 1018 | * | 15 | 1.06266E-11 | 0.101638323 | 0.012244298 | 0.044966875 | -0.05831796  | -0.010724514 | CASP7                     |
| chr17 | 30668751  | 30669189  | 439  | * | 4  | 1.7508E-09  | 0.010275373 | 0.012249331 | 0.010407776 | -0.036215548 | -0.012441611 | RP11-227G15.3, C17orf75   |
| chr19 | 52703857  | 52704819  | 963  | * | 4  | 4.07738E-11 | 0.000443812 | 0.012249973 | 0.000659574 | 0.10149105   | 0.072482486  | PPP2R1A                   |
| chr12 | 16499963  | 16500185  | 223  | * | 3  | 1.69639E-08 | 0.019937175 | 0.012253174 | 0.004128084 | -0.223806087 | -0.125141642 | MGST1                     |
| chr2  | 103035835 | 103035968 | 134  | * | 2  | 3.58514E-08 | 0.001017021 | 0.012279019 | 0.001930818 | -0.143519795 | -0.134404272 | IL18RAP                   |
| chr5  | 177876427 | 177876930 | 504  | * | 4  | 4.08237E-09 | 0.033213061 | 0.012280249 | 0.00573097  | -0.192486241 | -0.097979985 | COL23A1                   |
| chr8  | 9762716   | 9762850   | 135  | * | 2  | 7.01307E-09 | 0.006526675 | 0.012286823 | 0.007788944 | 0.020143844  | 0.017518381  | LINC00599                 |
| chr12 | 4385029   | 4386203   | 1175 | * | 7  | 1.40021E-12 | 0.027325036 | 0.012297053 | 0.010816343 | 0.132713724  | 0.033218496  | CCND2, CCND2-AS1          |
| chr2  | 227700114 | 227701050 | 937  | * | 13 | 6.99075E-22 | 0.002448057 | 0.012316979 | 0.000344716 | 0.155982349  | 0.043690113  | RHBDD1                    |

|       |           |           |      |   |    |             |             |             |             |              |              |                        |
|-------|-----------|-----------|------|---|----|-------------|-------------|-------------|-------------|--------------|--------------|------------------------|
| chr4  | 184367267 | 184367379 | 113  | * | 2  | 8.81867E-08 | 0.001713899 | 0.012325617 | 0.002941297 | -0.154495089 | -0.09851105  | CDKN2AIP               |
| chr1  | 246952118 | 246954479 | 2362 | * | 15 | 6.70895E-11 | 0.003864448 | 0.012329132 | 0.001595773 | 0.13610104   | 0.022481701  | RP11-439E19.3, KIF28P  |
| chr18 | 21033072  | 21033823  | 752  | * | 6  | 1.92784E-11 | 0.017148907 | 0.012340789 | 0.00315268  | 0.051814862  | 0.014684335  | RIOK3                  |
| chr1  | 223354216 | 223354607 | 392  | * | 5  | 1.83139E-10 | 0.001710346 | 0.012364445 | 0.001724407 | -0.179849173 | -0.049657004 | RP11-239E10.3          |
| chr8  | 42623718  | 42623946  | 229  | * | 6  | 3.38926E-11 | 0.01436164  | 0.012371472 | 0.001933951 | -0.159837475 | -0.074927159 | CHRNA6                 |
| chr11 | 8833689   | 8833973   | 285  | * | 4  | 1.42664E-12 | 0.006352055 | 0.012377941 | 0.000708837 | -0.127423297 | -0.06874442  | ST5                    |
| chr3  | 71730474  | 71731211  | 738  | * | 3  | 5.4219E-09  | 0.000213161 | 0.012380812 | 0.000604999 | -0.193905576 | -0.103605069 | EIF4E3                 |
| chr15 | 42693448  | 42694406  | 959  | * | 7  | 1.70848E-13 | 0.000701148 | 0.01238538  | 0.001049969 | 0.200723113  | 0.032642233  | CAPN3, RP11-164J13.1   |
| chr17 | 4844136   | 4844722   | 587  | * | 3  | 4.59979E-08 | 0.260340329 | 0.012423779 | 0.056827855 | 0.076214161  | 0.029176272  | RNF167                 |
| chr8  | 41504887  | 41505625  | 739  | * | 8  | 2.54473E-09 | 0.091111598 | 0.012426738 | 0.048133714 | 0.119153302  | 0.039877483  | NKX6-3                 |
| chr16 | 28834065  | 28835277  | 1213 | * | 8  | 1.33701E-14 | 0.023562943 | 0.012439116 | 0.003881034 | -0.212856528 | -0.05121604  | ATXN2L                 |
| chr19 | 2235103   | 2237081   | 1979 | * | 19 | 1.87785E-17 | 1.2686E-06  | 0.012454408 | 9.60199E-06 | -0.255827337 | -0.012801199 | SF3A2, PLEKHJ1         |
| chr17 | 36955626  | 36955717  | 92   | * | 2  | 5.81214E-08 | 0.004461647 | 0.012458598 | 0.006033532 | 0.019471308  | 0.005605482  | PIP4K2B                |
| chr7  | 156803122 | 156803578 | 457  | * | 5  | 6.48298E-08 | 0.0795629   | 0.012480487 | 0.029051504 | -0.053369513 | -0.009098165 | MNX1-AS1, MNX1         |
| chr8  | 104152750 | 104154149 | 1400 | * | 12 | 4.66347E-17 | 0.001148036 | 0.012483793 | 0.000588565 | -0.07025237  | 0.000315566  | BAALC, C8orf56         |
| chr17 | 81060149  | 81060259  | 111  | * | 3  | 5.88154E-10 | 0.000135434 | 0.012487793 | 0.000416736 | 0.241955929  | 0.184722935  |                        |
| chr6  | 32044163  | 32044959  | 797  | * | 8  | 2.73977E-13 | 0.152003219 | 0.012488765 | 0.007760818 | 0.159030922  | -0.011086144 | TNXB                   |
| chr6  | 132128915 | 132129021 | 107  | * | 6  | 1.57661E-07 | 0.034145057 | 0.012505946 | 0.008783349 | -0.05085538  | -0.007322101 |                        |
| chr2  | 27346079  | 27346508  | 430  | * | 5  | 5.08585E-08 | 0.160779043 | 0.012527166 | 0.028825822 | -0.070010429 | -0.039504745 |                        |
| chr15 | 49461632  | 49462514  | 883  | * | 10 | 2.35209E-11 | 0.085940378 | 0.012555431 | 0.017068743 | 0.121060143  | 0.029253224  | GALK2                  |
| chr3  | 129345793 | 129346101 | 309  | * | 3  | 4.38697E-08 | 0.002223992 | 0.012557534 | 0.003394455 | 0.026433847  | 0.007044549  |                        |
| chr17 | 74565757  | 74565795  | 39   | * | 2  | 1.79349E-07 | 0.003643126 | 0.012564048 | 0.005235397 | -0.139030029 | -0.102731521 | ST6GALNAC2             |
| chr17 | 29248641  | 29248848  | 208  | * | 4  | 7.88655E-08 | 0.017592261 | 0.012588428 | 0.012664919 | -0.065603759 | -0.029473739 | ADAP2                  |
| chr18 | 14748250  | 14748439  | 190  | * | 4  | 1.46028E-07 | 0.009212751 | 0.012594574 | 0.011428196 | -0.090740713 | -0.073840798 | ANKRD30B               |
| chr14 | 103565144 | 103566588 | 1445 | * | 9  | 1.75128E-15 | 2.56514E-06 | 0.012595878 | 1.39553E-05 | 0.181552855  | 0.125321556  | RP11-736N17.8, EXOC3L4 |
| chr5  | 39219235  | 39220149  | 915  | * | 5  | 1.90348E-14 | 7.79964E-05 | 0.012598735 | 6.71145E-05 | -0.179259553 | -0.075882618 | FYB                    |
| chr14 | 21488952  | 21491111  | 2160 | * | 10 | 3.69861E-13 | 0.003418804 | 0.012603104 | 0.000374181 | 0.127819294  | 0.019004075  | NDRG2                  |
| chr12 | 56862504  | 56863389  | 886  | * | 10 | 2.581E-19   | 0.000485573 | 0.012635709 | 0.000490971 | -0.146916886 | -0.044143481 | SPRYD4, MIP            |
| chr17 | 19880691  | 19881339  | 649  | * | 6  | 5.52688E-12 | 0.003466648 | 0.012642395 | 0.002554528 | 0.045587301  | 0.014778209  | AKAP10                 |

|       |           |           |      |   |    |             |             |             |             |              |              |                         |
|-------|-----------|-----------|------|---|----|-------------|-------------|-------------|-------------|--------------|--------------|-------------------------|
| chr12 | 54690656  | 54690833  | 178  | * | 4  | 8.75304E-10 | 0.000650816 | 0.012656177 | 0.001615453 | -0.091005477 | -0.058206743 | RP11-968A15.8, NFE2     |
| chr17 | 7155896   | 7156125   | 230  | * | 3  | 4.17004E-09 | 0.006872562 | 0.012670007 | 0.007815429 | 0.023019755  | -0.004149606 | ELP5, RP1-4G17.5        |
| chr7  | 72992005  | 72993765  | 1761 | * | 16 | 3.30336E-23 | 1.74747E-05 | 0.012685093 | 1.30298E-05 | 0.105751608  | -0.005890788 | TBL2                    |
| chr12 | 109896495 | 109897234 | 740  | * | 5  | 5.48542E-14 | 0.000186648 | 0.012688554 | 0.00031268  | 0.080445381  | 0.05557123   | KCTD10                  |
| chr14 | 102963178 | 102964872 | 1695 | * | 10 | 1.35968E-15 | 1.44047E-07 | 0.012690912 | 2.69543E-06 | 0.218613965  | 0.095084373  | TECPR2                  |
| chr8  | 125740425 | 125741566 | 1142 | * | 13 | 4.71645E-16 | 0.01343837  | 0.012693144 | 0.004316885 | 0.122233913  | 0.032439271  | MTSS1                   |
| chr16 | 1195373   | 1195491   | 119  | * | 2  | 8.47311E-08 | 0.001788161 | 0.012701635 | 0.003067106 | 0.204037856  | 0.134057801  |                         |
| chr20 | 21085983  | 21086336  | 354  | * | 4  | 1.18223E-09 | 0.011262925 | 0.012715768 | 0.007235572 | 0.03385296   | 0.021496281  | LINC00237               |
| chr1  | 226925082 | 226926318 | 1237 | * | 6  | 4.13063E-11 | 0.01136366  | 0.012717949 | 0.009818225 | -0.025066571 | 0.00204478   | ITPKB                   |
| chr20 | 34823091  | 34824487  | 1397 | * | 13 | 1.01891E-14 | 0.06899416  | 0.012722111 | 0.004679121 | 0.151616935  | 0.044467498  | AAR2                    |
| chr7  | 150086034 | 150086169 | 136  | * | 2  | 7.55373E-08 | 0.000846786 | 0.012725047 | 0.001672121 | -0.148392819 | -0.129501066 | ZNF775                  |
| chr20 | 32274191  | 32274911  | 721  | * | 7  | 1.63125E-11 | 0.094144476 | 0.012726744 | 0.010069157 | 0.127293223  | 0.014682242  | E2F1                    |
| chr17 | 8287126   | 8287763   | 638  | * | 4  | 1.30814E-09 | 0.033098623 | 0.012737325 | 0.025412208 | 0.048569672  | 0.030419635  |                         |
| chr4  | 110480700 | 110481823 | 1124 | * | 10 | 3.47466E-10 | 0.410417565 | 0.012748774 | 0.060143258 | 0.032182692  | 0.000533342  | CCDC109B                |
| chr10 | 102671221 | 102672937 | 1717 | * | 15 | 5.39928E-19 | 0.000554896 | 0.012767459 | 0.000170952 | 0.216833702  | -0.007900224 | FAM178A, RP11-179B2.2   |
| chr17 | 22020759  | 22020985  | 227  | * | 4  | 2.24657E-11 | 6.26869E-05 | 0.012776098 | 0.000224393 | 0.121748758  | 0.088906476  |                         |
| chr9  | 131486216 | 131487427 | 1212 | * | 11 | 2.42972E-16 | 0.000967517 | 0.012778604 | 0.000321707 | 0.138729568  | 0.021063009  | RP11-545E17.3, ZDHHC12  |
| chr12 | 116985510 | 116985884 | 375  | * | 3  | 2.576E-09   | 0.001655165 | 0.012795181 | 0.003013197 | -0.097288236 | -0.074447711 |                         |
| chr12 | 22778485  | 22778766  | 282  | * | 3  | 1.06203E-09 | 0.004008077 | 0.01280028  | 0.005958135 | -0.023636646 | 0.002501478  | ETNK1                   |
| chr5  | 95997186  | 95998008  | 823  | * | 18 | 3.86413E-10 | 0.797273504 | 0.012800955 | 0.29284704  | 0.03492167   | 0.00261651   | CAST                    |
| chr9  | 132815532 | 132816865 | 1334 | * | 13 | 3.78994E-16 | 0.031934065 | 0.012809667 | 0.00494951  | 0.02492824   | 0.010763028  | GPR107                  |
| chr1  | 204380802 | 204381404 | 603  | * | 10 | 1.67614E-11 | 0.015609887 | 0.012816964 | 0.012374693 | 0.067229004  | -0.007275777 | RP11-739N20.2, PPP1R15B |
| chr1  | 15271760  | 15272567  | 808  | * | 11 | 1.81579E-18 | 1.70583E-05 | 0.012851118 | 2.71967E-05 | 0.139744566  | 0.078736267  | KAZN                    |
| chr16 | 83762345  | 83762355  | 11   | * | 2  | 5.60915E-08 | 0.000804445 | 0.012855404 | 0.001605219 | -0.143067617 | -0.139214036 | CDH13, RP11-298D21.1    |
| chr9  | 139366472 | 139367397 | 926  | * | 5  | 1.73026E-11 | 1.27371E-05 | 0.012863097 | 7.38398E-05 | 0.153387711  | 0.115420582  | SEC16A                  |
| chr13 | 113435678 | 113435942 | 265  | * | 3  | 4.85727E-10 | 0.066352101 | 0.012871306 | 0.004213071 | 0.105364448  | 0.063720883  | ATP11A                  |
| chr17 | 3584925   | 3585166   | 242  | * | 3  | 8.75537E-09 | 0.000613985 | 0.012871706 | 0.001213058 | 0.11200202   | 0.089662686  | P2RX5-TAX1BP3, P2RX5    |
| chr6  | 41437676  | 41438063  | 388  | * | 3  | 3.56893E-08 | 0.003741353 | 0.012884124 | 0.00444214  | 0.066404208  | 0.035070057  |                         |
| chr7  | 102714667 | 102715565 | 899  | * | 14 | 3.06614E-13 | 0.106105709 | 0.012903736 | 0.01993983  | -0.039555796 | 0.001768947  | ARMC10, FBXL13          |



|       |           |           |      |   |    |             |             |             |             |              |              |                  |
|-------|-----------|-----------|------|---|----|-------------|-------------|-------------|-------------|--------------|--------------|------------------|
| chr17 | 57970021  | 57970985  | 965  | * | 16 | 2.76407E-12 | 0.072618789 | 0.012903932 | 0.040329115 | -0.04875837  | -0.009538696 | RPS6KB1, TUBD1   |
| chr8  | 145158241 | 145160216 | 1976 | * | 20 | 4.09205E-19 | 0.000539422 | 0.012915568 | 0.000393383 | 0.140033445  | 0.00688707   | MAF1, SHARPIN    |
| chr15 | 45028083  | 45028161  | 79   | * | 3  | 7.71423E-08 | 0.008527613 | 0.01291634  | 0.007969613 | 0.173985174  | 0.088474808  | TRIM69           |
| chr1  | 161168073 | 161172056 | 3984 | * | 28 | 3.4461E-22  | 0.000138735 | 0.012920267 | 1.14283E-06 | -0.167244281 | 0.014684222  | NDUFS2, ADAMTS4  |
| chr13 | 31479752  | 31481184  | 1433 | * | 11 | 2.75493E-21 | 1.62745E-06 | 0.012932744 | 9.55855E-06 | 0.151105752  | 0.042407328  | MEDAG, TEX26-AS1 |
| chr22 | 46432208  | 46432835  | 628  | * | 3  | 3.56504E-10 | 0.00030617  | 0.012936522 | 0.000848555 | 0.029096204  | 0.026507953  |                  |
| chr7  | 155174508 | 155175340 | 833  | * | 7  | 1.35239E-09 | 0.3141444   | 0.012970614 | 0.021611717 | -0.253828359 | -0.028404338 | AC008060.7       |
| chr4  | 3773891   | 3773996   | 106  | * | 4  | 1.54695E-08 | 0.022770024 | 0.012972904 | 0.004854771 | 0.091201064  | 0.047117647  |                  |
| chr14 | 20247183  | 20247919  | 737  | * | 3  | 8.22626E-09 | 0.000447061 | 0.012985664 | 0.001136142 | -0.126988269 | -0.09817083  | OR4N2            |
| chr19 | 7733642   | 7734203   | 562  | * | 6  | 1.10734E-18 | 4.6927E-07  | 0.012986055 | 4.54979E-06 | -0.191211009 | -0.13303267  | RETN             |
| chr18 | 19179948  | 19180362  | 415  | * | 2  | 1.24305E-11 | 0.001115685 | 0.012990042 | 0.002111674 | -0.047872913 | -0.005733471 | ESCO1            |
| chr17 | 64575563  | 64575592  | 30   | * | 3  | 1.40229E-07 | 0.005557955 | 0.013003817 | 0.006978639 | -0.14038847  | -0.07894342  | PRKCA            |
| chr7  | 158250911 | 158250978 | 68   | * | 2  | 2.04481E-09 | 0.000955926 | 0.013006458 | 0.001859092 | -0.218393665 | -0.163985509 | PTPRN2           |
| chr20 | 35503983  | 35504553  | 571  | * | 8  | 8.24308E-16 | 1.47127E-05 | 0.013007318 | 6.3948E-05  | 0.200274079  | 0.083997278  | TLDC2            |
| chr20 | 61309080  | 61310117  | 1038 | * | 5  | 3.29827E-13 | 1.696E-05   | 0.013020168 | 8.21628E-05 | -0.17677852  | -0.119310256 | SLCO4A1          |
| chr17 | 17006819  | 17007127  | 309  | * | 2  | 3.80865E-08 | 0.000833063 | 0.013032149 | 0.001657922 | 0.100742864  | 0.098049647  | MPRIP            |
| chr17 | 201273    | 201737    | 465  | * | 3  | 1.55034E-10 | 0.000351121 | 0.01304002  | 0.00093495  | 0.10069663   | 0.087241298  | RPH3AL           |
| chr4  | 170928131 | 170928419 | 289  | * | 2  | 1.54719E-07 | 0.000916507 | 0.01304146  | 0.001796115 | 0.097169694  | 0.006609108  | MFAP3L           |
| chr11 | 72929553  | 72929983  | 431  | * | 3  | 4.61796E-10 | 0.021402693 | 0.013041771 | 0.014857659 | -0.193828789 | -0.076181871 | P2RY2            |
| chr1  | 27669563  | 27669932  | 370  | * | 3  | 8.38073E-12 | 0.000113648 | 0.013043693 | 0.000381824 | -0.151993596 | -0.095285253 | SYTL1            |
| chr14 | 91281552  | 91281948  | 397  | * | 3  | 1.38512E-08 | 0.002334496 | 0.013065798 | 0.004041928 | 0.159943716  | 0.10581687   | TTC7B            |
| chr8  | 142189535 | 142189806 | 272  | * | 6  | 4.87967E-10 | 0.019590975 | 0.013067369 | 0.007859005 | 0.15924797   | 0.054903343  | DENND3           |
| chr12 | 103310839 | 103311500 | 662  | * | 8  | 2.37741E-12 | 0.025239823 | 0.013082073 | 0.008356599 | 0.098809748  | 0.024231098  | PAH              |
| chr22 | 46028579  | 46028727  | 149  | * | 2  | 1.67722E-07 | 0.000941595 | 0.013089958 | 0.001838523 | 0.136480843  | 0.101126005  |                  |
| chr3  | 135915333 | 135915556 | 224  | * | 2  | 8.33909E-10 | 0.002758418 | 0.01310237  | 0.00432292  | -0.053029417 | -0.01854821  | MSL2             |
| chr2  | 43037868  | 43038067  | 200  | * | 2  | 3.48608E-08 | 0.423761034 | 0.013114185 | 0.039287449 | 0.025069116  | 0.013203113  |                  |
| chr1  | 111742914 | 111744503 | 1590 | * | 13 | 1.05466E-12 | 0.000257577 | 0.013141104 | 0.000271022 | -0.208707847 | -0.036959008 | CHI3L2, DENND2D  |
| chr11 | 73694157  | 73695045  | 889  | * | 8  | 9.5198E-15  | 0.001349378 | 0.013144853 | 0.001388426 | 0.099362581  | 0.014371328  | UCP2             |
| chr7  | 144531951 | 144533283 | 1333 | * | 12 | 2.23516E-11 | 0.207831526 | 0.013176419 | 0.021717538 | 0.064648999  | 0.00636254   | TPK1             |

|       |           |           |      |   |    |             |             |             |             |              |              |                                |
|-------|-----------|-----------|------|---|----|-------------|-------------|-------------|-------------|--------------|--------------|--------------------------------|
| chr7  | 2671535   | 2671838   | 304  | * | 3  | 3.42798E-09 | 0.248357381 | 0.013183174 | 0.057674989 | 0.029175571  | 0.007209468  | TTYH3                          |
| chr13 | 78271382  | 78273164  | 1783 | * | 20 | 4.87613E-19 | 0.001782058 | 0.013200712 | 0.000852707 | -0.030646343 | 0.001852899  | SLAIN1, MIR3665                |
| chr6  | 15505949  | 15506085  | 137  | * | 2  | 4.22647E-08 | 0.001705183 | 0.013201539 | 0.002986369 | 0.138417397  | 0.105203739  | JARID2                         |
| chr17 | 27187966  | 27188437  | 472  | * | 2  | 9.5231E-09  | 0.004917157 | 0.01320307  | 0.006604889 | 0.090650799  | 0.069297732  | ERAL1, MIR451B                 |
| chr11 | 47398575  | 47400931  | 2357 | * | 14 | 6.34242E-19 | 1.76915E-06 | 0.013208464 | 2.01283E-06 | -0.190877084 | -0.057290843 | SPI1                           |
| chr4  | 48832037  | 48832156  | 120  | * | 2  | 1.13921E-08 | 0.091632583 | 0.013220767 | 0.030561293 | -0.123623027 | -0.064214224 | OCIAD1                         |
| chr14 | 95651866  | 95652850  | 985  | * | 7  | 6.11497E-16 | 0.000453029 | 0.013235187 | 0.000241966 | -0.074707303 | -0.041333873 | CLMN, CTD-2240H23.2            |
| chr16 | 70759095  | 70760142  | 1048 | * | 6  | 8.35309E-15 | 3.09331E-05 | 0.013239736 | 9.16197E-05 | 0.129698786  | 0.065488751  | VAC14                          |
| chr7  | 148936039 | 148937111 | 1073 | * | 12 | 3.962E-14   | 0.009592506 | 0.013240242 | 0.001857521 | -0.217151157 | -0.033456685 | ZNF212                         |
| chr11 | 63996766  | 63997982  | 1217 | * | 10 | 7.22765E-16 | 0.116363128 | 0.013256457 | 0.01100996  | 0.192581741  | 0.044004783  | NUDT22, DNAJC4, RP11-783K16.14 |
| chr17 | 21116851  | 21117780  | 930  | * | 8  | 6.21856E-14 | 0.007826816 | 0.013259998 | 0.002071138 | 0.032014042  | 0.013642949  | AC087294.2, TMEM11             |
| chr1  | 6475317   | 6475535   | 219  | * | 3  | 2.15573E-09 | 0.000338831 | 0.013268549 | 0.000900646 | -0.108300183 | -0.079209789 | HES2                           |
| chr9  | 38069796  | 38069959  | 164  | * | 3  | 3.24808E-09 | 0.003388233 | 0.013271737 | 0.002689179 | 0.022095903  | 0.008313982  |                                |
| chr11 | 75109830  | 75111245  | 1416 | * | 13 | 8.61714E-14 | 0.032521527 | 0.013284187 | 0.010771749 | -0.059024319 | -0.004068424 | RPS3                           |
| chr11 | 46638289  | 46638919  | 631  | * | 10 | 2.61731E-09 | 0.17684582  | 0.013285163 | 0.043093719 | -0.03941763  | -0.001229501 | ATG13, HARBI1                  |
| chr1  | 153329460 | 153330776 | 1317 | * | 11 | 1.68775E-16 | 0.000766345 | 0.013292657 | 2.34892E-05 | -0.154031256 | -0.060024038 | S100A9                         |
| chr16 | 3639688   | 3639839   | 152  | * | 2  | 1.41285E-07 | 0.001430891 | 0.013312392 | 0.002601466 | -0.096977407 | -0.092419713 | SLX4                           |
| chr3  | 53289400  | 53290482  | 1083 | * | 14 | 9.04631E-12 | 0.118831314 | 0.013314435 | 0.055046174 | -0.078045632 | -0.005851618 | TKT                            |
| chr13 | 50509902  | 50510427  | 526  | * | 6  | 3.63219E-10 | 0.085332644 | 0.013316433 | 0.03639534  | -0.055937747 | -0.013207107 | SPRYD7                         |
| chr5  | 150018831 | 150020288 | 1458 | * | 7  | 6.19543E-09 | 0.003570013 | 0.013344568 | 0.000484359 | -0.198481362 | -0.073689821 | SYNPO                          |
| chr8  | 145643030 | 145644123 | 1094 | * | 6  | 1.58374E-13 | 0.005338527 | 0.013346705 | 0.001292565 | 0.179670529  | 0.09245413   |                                |
| chr9  | 84386662  | 84386734  | 73   | * | 2  | 1.75708E-07 | 0.000935752 | 0.013357067 | 0.001837267 | -0.15902092  | -0.143804556 | RP11-154D17.1                  |
| chr16 | 4357055   | 4357936   | 882  | * | 7  | 1.34363E-11 | 0.012680158 | 0.013358909 | 0.00178586  | -0.126279549 | -0.027360645 |                                |
| chr2  | 239330108 | 239330202 | 95   | * | 3  | 7.72139E-09 | 0.000638917 | 0.013359737 | 0.001223474 | 0.154326905  | 0.115680332  |                                |
| chr19 | 44123486  | 44124896  | 1411 | * | 15 | 4.37273E-12 | 0.120597857 | 0.013365115 | 0.018760533 | 0.115409346  | 0.018167499  | ZNF428                         |
| chr1  | 6052166   | 6052785   | 620  | * | 14 | 1.00655E-14 | 0.012271065 | 0.01336871  | 0.003742222 | 0.019438906  | 0.005413793  | KCNAB2, NPHP4                  |
| chr1  | 239550177 | 239550578 | 402  | * | 4  | 1.11386E-08 | 0.036113074 | 0.013378544 | 0.018946073 | 0.024563355  | 0.013079667  | CHRM3                          |
| chr10 | 102891568 | 102891879 | 312  | * | 2  | 2.96339E-08 | 0.019703321 | 0.013382852 | 0.015884977 | 0.039852639  | 0.030994486  | TLX1                           |
| chr2  | 242887053 | 242887391 | 339  | * | 3  | 6.57738E-09 | 0.004775871 | 0.01339276  | 0.003462228 | 0.176473016  | 0.101526119  | AC131097.3                     |

|       |           |           |      |   |    |             |             |             |             |              |              |                    |
|-------|-----------|-----------|------|---|----|-------------|-------------|-------------|-------------|--------------|--------------|--------------------|
| chr8  | 144896176 | 144896694 | 519  | * | 4  | 3.90041E-13 | 0.001167872 | 0.013395348 | 0.00096509  | -0.189654473 | -0.105199085 | SCRIB              |
| chr8  | 145639652 | 145639880 | 229  | * | 3  | 9.43732E-08 | 0.017096647 | 0.013400892 | 0.014195027 | 0.132057791  | 0.047655673  | SLC39A4            |
| chr3  | 50273096  | 50273340  | 245  | * | 4  | 1.14098E-09 | 0.007239101 | 0.013417081 | 0.007188525 | -0.065503844 | -0.054225042 | GNAI2              |
| chr19 | 5477638   | 5478484   | 847  | * | 4  | 1.21682E-09 | 0.000298684 | 0.013425327 | 0.000449451 | 0.153049418  | 0.088199149  |                    |
| chr12 | 104851172 | 104851316 | 145  | * | 2  | 1.96568E-09 | 0.051798062 | 0.013438086 | 0.025241564 | 0.026645525  | 0.009851337  | CHST11             |
| chr11 | 113930430 | 113931305 | 876  | * | 8  | 1.75977E-11 | 0.033226738 | 0.013446641 | 0.004607911 | -0.084167407 | -0.009681567 | ZBTB16             |
| chr1  | 226109692 | 226110727 | 1036 | * | 3  | 6.8055E-09  | 0.000147563 | 0.013449118 | 0.0004726   | 0.155109992  | -0.002733179 | RP4-559A3.7, PYCR2 |
| chr12 | 57881856  | 57883315  | 1460 | * | 8  | 7.01439E-15 | 0.13912516  | 0.013461348 | 0.001108545 | 0.115366804  | 0.022656893  | MARS, ARHGAP9      |
| chr7  | 95064015  | 95064738  | 724  | * | 12 | 7.25351E-11 | 0.105246703 | 0.013490787 | 0.040457964 | -0.06176947  | -0.00264242  | PON2               |
| chr3  | 46943819  | 46943940  | 122  | * | 2  | 1.73006E-07 | 0.000926934 | 0.0134929   | 0.001826865 | -0.131503641 | -0.089401776 | PTH1R              |
| chr10 | 65280473  | 65281299  | 827  | * | 11 | 3.05149E-16 | 0.003235908 | 0.013504029 | 0.000285372 | -0.270703839 | -0.029529497 | REEP3              |
| chr12 | 54069773  | 54071168  | 1396 | * | 20 | 1.27067E-16 | 0.034024659 | 0.013512965 | 0.017611937 | 0.043214744  | 0.00772215   | ATP5G2             |
| chr21 | 47808810  | 47809310  | 501  | * | 5  | 8.02808E-12 | 7.57198E-05 | 0.013519827 | 0.000310203 | 0.140346354  | 0.08904761   | PCNT               |
| chr11 | 118307464 | 118307782 | 319  | * | 4  | 2.22437E-09 | 0.030416046 | 0.013526449 | 0.006580269 | -0.261889411 | -0.077597022 | KMT2A              |
| chr17 | 1665119   | 1665303   | 185  | * | 6  | 1.08717E-08 | 0.034922842 | 0.013526911 | 0.01202734  | -0.166507314 | -0.06206751  | SERPINF1           |
| chr12 | 58158537  | 58159051  | 515  | * | 3  | 8.30909E-10 | 0.002852171 | 0.013551055 | 0.002810263 | 0.078634666  | 0.039659995  | CYP27B1            |
| chr19 | 13048623  | 13051573  | 2951 | * | 17 | 1.12433E-13 | 0.03714024  | 0.013562656 | 0.00017283  | -0.169084481 | -0.018843075 | CALR               |
| chr5  | 96078430  | 96078834  | 405  | * | 4  | 3.08102E-09 | 0.018399678 | 0.013615129 | 0.007921762 | -0.221512446 | -0.129998334 | CAST               |
| chr18 | 74845706  | 74846035  | 330  | * | 3  | 1.30876E-08 | 0.002987544 | 0.01365672  | 0.004388246 | -0.132439573 | -0.04603504  |                    |
| chr14 | 102198157 | 102198604 | 448  | * | 3  | 2.86559E-10 | 7.11183E-05 | 0.013723109 | 0.000262498 | -0.125612367 | -0.115156762 | RP11-796G6.2       |
| chr2  | 96068327  | 96068732  | 406  | * | 8  | 4.63945E-09 | 0.096937182 | 0.013728509 | 0.031078607 | 0.018667775  | 0.006788021  | FAHD2A             |
| chr6  | 32095148  | 32096917  | 1770 | * | 36 | 6.06524E-25 | 0.003901909 | 0.013734355 | 0.007053728 | 0.068852339  | 0.005892287  | ATF6B, FKBPL       |
| chr6  | 33215649  | 33215685  | 37   | * | 2  | 8.15696E-08 | 0.080518007 | 0.013754663 | 0.03015642  | -0.16563458  | -0.077577036 |                    |
| chr17 | 41919393  | 41919603  | 211  | * | 3  | 7.66335E-09 | 0.004251455 | 0.013787388 | 0.004146017 | 0.225569714  | 0.108902661  |                    |
| chr10 | 5455556   | 5455710   | 155  | * | 3  | 4.64376E-08 | 0.003354875 | 0.013800593 | 0.005334223 | -0.094500803 | -0.077112388 | NET1               |
| chr2  | 136757496 | 136757908 | 413  | * | 2  | 2.4597E-08  | 0.001394134 | 0.01381174  | 0.002571357 | 0.164559342  | 0.13230437   | AC093391.2         |
| chr13 | 114929471 | 114929474 | 4    | * | 2  | 1.12097E-08 | 0.000923317 | 0.013813711 | 0.001830258 | 0.120716276  | 0.102959768  |                    |
| chr16 | 2770211   | 2770429   | 219  | * | 5  | 9.1614E-08  | 0.06519721  | 0.013831866 | 0.035606399 | 0.183226267  | 0.059154505  | PRSS27             |
| chr14 | 21943848  | 21944110  | 263  | * | 2  | 8.34244E-10 | 0.004827665 | 0.013832625 | 0.006635619 | 0.054498721  | 0.01695509   | RAB2B              |

|       |           |           |      |   |    |             |             |             |             |              |              |                                      |
|-------|-----------|-----------|------|---|----|-------------|-------------|-------------|-------------|--------------|--------------|--------------------------------------|
| chr8  | 20831094  | 20831946  | 853  | * | 6  | 6.85973E-11 | 0.000468114 | 0.013835267 | 0.000957116 | 0.114060997  | 0.063541809  | RP11-421P23.1, RP11-369E15.3         |
| chr16 | 88846234  | 88846292  | 59   | * | 2  | 5.3138E-09  | 0.001044525 | 0.013843527 | 0.002029693 | 0.121213871  | 0.106504882  | PIEZO1                               |
| chr5  | 1886828   | 1888218   | 1391 | * | 19 | 4.22631E-18 | 0.075754194 | 0.01385117  | 0.002763729 | 0.071758518  | 0.019864618  | CTD-2194D22.4, IRX4                  |
| chr3  | 122514443 | 122514814 | 372  | * | 6  | 4.73947E-12 | 0.096601089 | 0.013854226 | 0.003114034 | -0.201403206 | -0.062799102 | DIRC2                                |
| chr21 | 39871287  | 39871503  | 217  | * | 4  | 4.05929E-10 | 0.000466885 | 0.013870347 | 0.001157364 | -0.204251041 | -0.09917043  | ERG                                  |
| chr17 | 77810269  | 77810912  | 644  | * | 3  | 8.5288E-09  | 0.001366628 | 0.0138773   | 0.00213138  | -0.105142847 | -0.058693173 | CBX4                                 |
| chr5  | 32312181  | 32313186  | 1006 | * | 5  | 3.91307E-10 | 0.405251424 | 0.013878819 | 0.044754743 | 0.07355023   | 0.008979904  | MTMR12                               |
| chr16 | 87350553  | 87351569  | 1017 | * | 11 | 4.61316E-18 | 0.000446354 | 0.013915774 | 0.000124725 | -0.050625044 | 0.004010943  | RP11-178L8.7, C16orf95, RP11-178L8.4 |
| chr22 | 29977162  | 29977949  | 788  | * | 8  | 1.43515E-08 | 0.355591861 | 0.013931494 | 0.062058251 | 0.117138961  | 0.020300268  | NIPSNAP1                             |
| chr14 | 51297334  | 51297571  | 238  | * | 6  | 8.00179E-11 | 0.035779937 | 0.013932055 | 0.010589705 | -0.061861333 | -0.018285924 | NIN                                  |
| chr22 | 29783861  | 29785355  | 1495 | * | 12 | 1.11075E-12 | 0.023415355 | 0.013975552 | 0.002136504 | 0.093365116  | 0.020575412  | AP1B1                                |
| chr12 | 66581539  | 66583431  | 1893 | * | 13 | 7.40573E-15 | 0.001244062 | 0.013989934 | 0.000754904 | -0.236885415 | -0.033499149 | IRAK3                                |
| chr9  | 35755286  | 35755346  | 61   | * | 2  | 3.59745E-08 | 0.001047222 | 0.01401858  | 0.002039838 | 0.138330656  | 0.132964106  | RGP1, MSMP                           |
| chr11 | 36396962  | 36397458  | 497  | * | 4  | 9.71978E-11 | 0.010482074 | 0.014024966 | 0.004641972 | 0.10226565   | 0.069903652  | PRR5L                                |
| chr16 | 731417    | 732033    | 617  | * | 7  | 3.97907E-09 | 0.321763944 | 0.014027971 | 0.127053859 | 0.204955589  | 0.038790707  | STUB1, JMJD8                         |
| chr16 | 23607392  | 23607835  | 444  | * | 9  | 4.76734E-13 | 0.01072774  | 0.01403279  | 0.005655775 | 0.031748602  | 0.004837898  | NDUFAB1                              |
| chr18 | 77710649  | 77710866  | 218  | * | 3  | 2.16489E-09 | 0.002356682 | 0.014043943 | 0.002674778 | -0.053228699 | -0.007078488 | PQLC1                                |
| chr20 | 58629939  | 58631038  | 1100 | * | 8  | 5.29744E-18 | 1.25669E-05 | 0.014068004 | 2.83037E-05 | -0.333963102 | -0.071859494 | C20orf197                            |
| chr6  | 159458115 | 159458149 | 35   | * | 3  | 1.13666E-08 | 0.003860695 | 0.01407405  | 0.005892998 | -0.168288929 | -0.097346448 | RP1-111C20.4, TAGAP                  |
| chr3  | 169530027 | 169530817 | 791  | * | 11 | 2.31642E-10 | 0.363099856 | 0.01407478  | 0.081587783 | -0.153059983 | -0.018854269 | LRRC34                               |
| chr19 | 9731681   | 9732024   | 344  | * | 7  | 1.38961E-09 | 0.039041443 | 0.014091524 | 0.018954358 | 0.01793146   | 0.012062761  | C19orf82, ZNF561                     |
| chr10 | 75570314  | 75571738  | 1425 | * | 8  | 1.90118E-08 | 0.017457034 | 0.014099772 | 0.006171808 | -0.224961347 | -0.03840881  | RP11-574K11.31, NDST2                |
| chr15 | 78835700  | 78835713  | 14   | * | 2  | 1.15737E-07 | 0.00122465  | 0.01410012  | 0.002324811 | -0.075882177 | -0.071370041 | PSMA4                                |
| chr19 | 35521622  | 35521772  | 151  | * | 3  | 2.59763E-08 | 0.009042659 | 0.014106913 | 0.010359788 | 0.016434089  | 0.009360614  | SCN1B                                |
| chr2  | 16804409  | 16805111  | 703  | * | 5  | 6.61606E-10 | 0.051771503 | 0.014110972 | 0.002374642 | -0.162784411 | -0.057873291 | FAM49A                               |
| chr3  | 13922426  | 13922921  | 496  | * | 2  | 1.60158E-08 | 0.015457764 | 0.014134023 | 0.014250131 | 0.160246555  | 0.09679339   |                                      |
| chr3  | 52720031  | 52720522  | 492  | * | 7  | 1.05074E-07 | 0.277444678 | 0.014138331 | 0.04778745  | -0.191676176 | -0.029948354 | GNL3                                 |
| chr3  | 188862579 | 188862727 | 149  | * | 3  | 9.73209E-08 | 0.040917355 | 0.014143914 | 0.004977501 | -0.135681832 | -0.071335513 | TPRG1                                |
| chr7  | 134142981 | 134143249 | 269  | * | 2  | 2.08526E-08 | 0.08788753  | 0.014159299 | 0.031661654 | 0.144412996  | 0.073509417  | AKR1B1                               |

|       |           |           |      |   |    |             |             |             |             |              |              |                 |
|-------|-----------|-----------|------|---|----|-------------|-------------|-------------|-------------|--------------|--------------|-----------------|
| chr17 | 42081594  | 42082647  | 1054 | * | 12 | 7.70359E-25 | 2.75599E-07 | 0.014162209 | 1.09918E-06 | 0.187239101  | 0.069178788  | NAGS, PYY       |
| chr6  | 154677796 | 154678593 | 798  | * | 5  | 6.25416E-12 | 0.000198782 | 0.014175314 | 0.00015863  | -0.155037269 | -0.08772447  | IPCEF1          |
| chr15 | 48874772  | 48874903  | 132  | * | 2  | 2.09261E-07 | 0.000984139 | 0.014182209 | 0.001941817 | 0.13236829   | 0.099346307  | FBN1            |
| chr2  | 222384636 | 222384727 | 92   | * | 3  | 1.99855E-08 | 0.00172178  | 0.014183254 | 0.002141001 | 0.093431628  | 0.073172719  | EPHA4           |
| chr16 | 67880254  | 67880962  | 709  | * | 8  | 6.49061E-12 | 0.028882605 | 0.014200586 | 0.009585369 | 0.040348006  | 0.01634504   | NUTF2, CENPT    |
| chr8  | 54755419  | 54755598  | 180  | * | 6  | 1.03374E-07 | 0.466206494 | 0.014208708 | 0.121008994 | 0.033691437  | 0.007243066  | ATP6V1H         |
| chr21 | 46234991  | 46235052  | 62   | * | 2  | 1.30024E-07 | 0.000973133 | 0.014231782 | 0.001925087 | -0.124888272 | -0.116085884 | SUMO3           |
| chr3  | 169939691 | 169940839 | 1149 | * | 13 | 1.27927E-17 | 0.000263325 | 0.014245625 | 0.000236114 | -0.093293493 | -0.025004859 | PRKCI           |
| chr1  | 109419967 | 109420278 | 312  | * | 3  | 6.75752E-08 | 0.025536165 | 0.014258537 | 0.013227229 | -0.093220906 | -0.03142803  | GPSP2, AKNAD1   |
| chr13 | 46757395  | 46757637  | 243  | * | 4  | 2.82458E-11 | 5.5824E-05  | 0.014262839 | 0.000245421 | 0.180355463  | 0.108801935  | LCP1            |
| chr20 | 33297742  | 33298052  | 311  | * | 2  | 2.31667E-08 | 0.001859657 | 0.014305931 | 0.003270504 | 0.035413195  | 0.029776238  | TP53INP2, NCOA6 |
| chr2  | 128568574 | 128569513 | 940  | * | 12 | 1.39949E-12 | 0.048699788 | 0.014308646 | 0.008758329 | -0.115383304 | -0.00718776  | WDR33           |
| chr6  | 126239565 | 126240163 | 599  | * | 4  | 3.40132E-11 | 0.000672604 | 0.014311861 | 0.001163024 | -0.082178784 | -0.02552607  | NCOA7           |
| chr14 | 61122327  | 61122911  | 585  | * | 3  | 2.08942E-09 | 0.014161772 | 0.014324337 | 0.01330114  | 0.038872716  | 0.012749589  | SIX1            |
| chr16 | 67907176  | 67907310  | 135  | * | 3  | 7.28249E-08 | 0.040897918 | 0.014326073 | 0.026274049 | 0.019659829  | 0.008496839  | EDC4            |
| chr2  | 139260299 | 139260866 | 568  | * | 2  | 6.82634E-09 | 0.003113727 | 0.014327192 | 0.00487493  | -0.143419388 | -0.102436217 | SPOPL           |
| chr1  | 201139713 | 201140721 | 1009 | * | 6  | 1.4888E-14  | 0.000372444 | 0.01432793  | 0.000767839 | 0.079150279  | 0.025131638  | TMEM9           |
| chr20 | 55836268  | 55836676  | 409  | * | 2  | 6.1301E-10  | 0.001304201 | 0.014336935 | 0.002457843 | 0.169654702  | 0.145348133  | BMP7            |
| chr7  | 1601923   | 1602273   | 351  | * | 5  | 6.74755E-08 | 0.210714537 | 0.014361655 | 0.017599012 | 0.102504717  | 0.035745297  |                 |
| chr19 | 57050312  | 57050834  | 523  | * | 6  | 3.75878E-09 | 0.031070212 | 0.014368645 | 0.011410325 | -0.04115196  | -0.02090496  | ZFP28           |
| chr16 | 89177266  | 89177293  | 28   | * | 2  | 3.54084E-08 | 0.001008486 | 0.014378977 | 0.001987918 | 0.106095668  | 0.083547094  | ACSF3           |
| chr3  | 27770852  | 27771053  | 202  | * | 3  | 7.3887E-08  | 0.03157393  | 0.014381147 | 0.010823394 | -0.069099929 | -0.011973429 |                 |
| chr9  | 133884862 | 133885058 | 197  | * | 3  | 7.93641E-09 | 0.006914833 | 0.014381208 | 0.006430982 | 0.084679803  | 0.01369806   | LAMC3           |
| chr7  | 139477474 | 139478495 | 1022 | * | 11 | 5.28756E-12 | 0.042427163 | 0.014382022 | 0.01588794  | 0.053896688  | 0.006061648  | TBXAS1, HIPK2   |
| chr14 | 53618732  | 53619311  | 580  | * | 3  | 4.26844E-09 | 0.008484493 | 0.014386364 | 0.008400657 | -0.024946771 | -0.007885617 | DDHD1           |
| chr11 | 46143434  | 46143461  | 28   | * | 2  | 4.33595E-08 | 0.036601221 | 0.014398039 | 0.022656899 | 0.020023766  | 0.012489751  |                 |
| chr3  | 197024963 | 197025640 | 678  | * | 8  | 1.59136E-12 | 0.01197981  | 0.014413637 | 0.006816657 | -0.03151227  | -0.008733644 | DLG1-AS1, DLG1  |
| chr19 | 54768850  | 54768927  | 78   | * | 2  | 8.08867E-08 | 0.001718217 | 0.01441983  | 0.003077249 | -0.148952055 | -0.112389155 |                 |
| chr6  | 170602911 | 170602968 | 58   | * | 2  | 1.14182E-07 | 0.003131282 | 0.014427233 | 0.004906653 | 0.106735571  | 0.018694459  | FAM120B         |

|       |           |           |      |   |    |             |             |             |             |              |              |                              |
|-------|-----------|-----------|------|---|----|-------------|-------------|-------------|-------------|--------------|--------------|------------------------------|
| chr10 | 104153568 | 104154605 | 1038 | * | 18 | 3.1647E-13  | 0.10940106  | 0.014427612 | 0.050320756 | -0.195592888 | -0.016263519 | NFKB2                        |
| chr11 | 33562503  | 33563946  | 1444 | * | 9  | 2.60071E-17 | 0.000156102 | 0.014428596 | 7.80102E-05 | -0.214103499 | -0.06775083  | KIAA1549L                    |
| chr17 | 53827579  | 53827880  | 302  | * | 4  | 3.19319E-09 | 0.016040147 | 0.014434281 | 0.015355514 | -0.137303401 | -0.05697193  |                              |
| chr3  | 155524335 | 155524983 | 649  | * | 4  | 9.59514E-11 | 0.000289611 | 0.014440408 | 0.000707635 | -0.128651028 | -0.067551151 |                              |
| chr12 | 110435360 | 110435418 | 59   | * | 2  | 2.08172E-09 | 0.001001203 | 0.014449073 | 0.001978005 | -0.200854154 | -0.170626952 |                              |
| chr4  | 54424764  | 54425349  | 586  | * | 5  | 3.11943E-09 | 0.004570281 | 0.014457737 | 0.003432063 | -0.175062313 | 0.000528     | FIP1L1, LNX1                 |
| chr1  | 17304887  | 17305562  | 676  | * | 6  | 5.99938E-09 | 0.047694841 | 0.014460971 | 0.01747468  | -0.119246839 | -0.042558662 | RP1-37C10.3, MFAP2           |
| chr2  | 114646429 | 114648348 | 1920 | * | 17 | 2.89143E-13 | 0.045442328 | 0.014461662 | 0.003346971 | 0.165239125  | -0.001286308 | ACTR3, RP11-141B14.1         |
| chr8  | 6484293   | 6484687   | 395  | * | 4  | 5.65895E-11 | 9.69668E-05 | 0.014485417 | 0.000374479 | 0.099340374  | 0.074686577  | MCPH1, CTD-2541M15.1         |
| chr13 | 45914478  | 45916557  | 2080 | * | 17 | 1.34825E-10 | 0.106570572 | 0.014498597 | 0.01357292  | -0.113164542 | -0.009007661 | RP11-290D2.6, TPT1-AS1, TPT1 |
| chr1  | 154540535 | 154540904 | 370  | * | 2  | 2.63494E-08 | 0.002056715 | 0.014525281 | 0.00355661  | -0.090861437 | -0.035397872 | CHRNA2                       |
| chr5  | 131629910 | 131631610 | 1701 | * | 19 | 1.61263E-21 | 0.000891244 | 0.014529377 | 7.11569E-05 | -0.166125844 | -0.028573507 | SLC22A4, P4HA2               |
| chr11 | 133826329 | 133827076 | 748  | * | 6  | 1.9461E-12  | 0.00248459  | 0.014539684 | 0.00235165  | 0.044539809  | 0.019708558  | IGSF9B, AP000911.1           |
| chr6  | 135506834 | 135507123 | 290  | * | 2  | 3.83345E-08 | 0.001072265 | 0.014544897 | 0.002097655 | -0.163332311 | -0.119061487 | MYB                          |
| chr3  | 11766272  | 11766469  | 198  | * | 2  | 9.44809E-08 | 0.001026584 | 0.014546466 | 0.002022843 | -0.194868168 | -0.023903236 | AC090939.1                   |
| chr20 | 34892811  | 34892819  | 9    | * | 2  | 1.56712E-07 | 0.003532678 | 0.014547661 | 0.00538455  | 0.10928056   | 0.102617891  |                              |
| chr16 | 57661327  | 57662541  | 1215 | * | 13 | 2.93194E-12 | 0.26436493  | 0.01454906  | 0.049812692 | 0.17905622   | 0.0421488    | GPR56, RP11-405F3.5          |
| chr5  | 131745958 | 131746256 | 299  | * | 4  | 2.92181E-08 | 0.116986227 | 0.014550868 | 0.014343315 | 0.040471519  | 0.011885845  |                              |
| chr16 | 3661771   | 3663072   | 1302 | * | 7  | 2.95664E-10 | 0.003511142 | 0.014550983 | 0.000867711 | -0.17747554  | -0.026089656 | DNASE1                       |
| chr19 | 16178030  | 16178570  | 541  | * | 12 | 4.62231E-14 | 0.068949227 | 0.014555361 | 0.005803004 | 0.190226505  | 0.067983678  | TPM4                         |
| chr19 | 7166458   | 7167821   | 1364 | * | 6  | 6.44854E-09 | 0.000331407 | 0.014557543 | 0.000367557 | 0.153705988  | 0.104724642  | INSR                         |
| chr11 | 62371423  | 62371596  | 174  | * | 3  | 8.86084E-09 | 0.035096108 | 0.014572122 | 0.005201229 | 0.121028394  | 0.074709642  | EML3                         |
| chr1  | 110673082 | 110673319 | 238  | * | 3  | 5.09243E-08 | 0.035120778 | 0.014574095 | 0.016552403 | 0.06592424   | 0.036989796  |                              |
| chr22 | 22292442  | 22293793  | 1352 | * | 11 | 5.06245E-15 | 0.001368149 | 0.014592851 | 0.000130579 | -0.258580738 | -0.021520971 | LL22NC03-86G7.1, PPM1F       |
| chr5  | 539420    | 539998    | 579  | * | 4  | 3.40853E-12 | 0.000136566 | 0.014616255 | 0.0002972   | 0.112845608  | 0.018314696  |                              |
| chr11 | 10952789  | 10953109  | 321  | * | 3  | 2.32329E-08 | 0.026166032 | 0.014641212 | 0.010729391 | -0.022894162 | -0.004437613 |                              |
| chr1  | 244531718 | 244531920 | 203  | * | 3  | 2.54249E-08 | 0.003474488 | 0.014643768 | 0.002934635 | -0.176707066 | -0.126416124 | C1orf100                     |
| chr1  | 22213376  | 22214106  | 731  | * | 5  | 3.50431E-11 | 0.009384544 | 0.014659559 | 0.002426081 | 0.091094829  | 0.034110011  | HSPG2                        |
| chr1  | 172608566 | 172608704 | 139  | * | 3  | 7.31788E-10 | 0.000127529 | 0.014668162 | 0.000429337 | 0.124064267  | 0.099009557  |                              |

|       |           |           |      |   |    |             |             |             |             |              |              |                      |
|-------|-----------|-----------|------|---|----|-------------|-------------|-------------|-------------|--------------|--------------|----------------------|
| chr6  | 40445150  | 40445699  | 550  | * | 3  | 2.64805E-09 | 0.000222919 | 0.014679287 | 0.000674852 | 0.173357384  | 0.139962708  | LRFN2                |
| chr10 | 25350761  | 25351314  | 554  | * | 4  | 1.80986E-11 | 0.00126862  | 0.014702105 | 0.001339629 | 0.162118592  | 0.107399907  |                      |
| chr16 | 48592404  | 48592694  | 291  | * | 3  | 4.96354E-09 | 0.000593953 | 0.014707477 | 0.001365381 | -0.250278746 | -0.158452515 | N4BP1                |
| chr2  | 54900910  | 54901055  | 146  | * | 3  | 7.10104E-08 | 0.002351006 | 0.014712157 | 0.004226554 | -0.119945037 | -0.077785453 |                      |
| chr6  | 692465    | 692947    | 483  | * | 2  | 8.5903E-09  | 0.015528032 | 0.014719919 | 0.014580454 | 0.017793988  | 0.011791473  | EXOC2                |
| chr18 | 9885685   | 9886064   | 380  | * | 4  | 2.41428E-09 | 0.007468395 | 0.014743773 | 0.004433601 | 0.107293277  | 0.047123961  | TXNDC2               |
| chr11 | 64620640  | 64621560  | 921  | * | 5  | 8.58967E-14 | 2.63616E-05 | 0.014747012 | 0.00010969  | -0.234152944 | -0.123788381 | EHD1                 |
| chr7  | 139498041 | 139498312 | 272  | * | 3  | 8.00157E-10 | 0.000117469 | 0.014748501 | 0.000406183 | 0.12191838   | 0.114234842  | TBXAS1               |
| chr1  | 152008878 | 152011357 | 2480 | * | 18 | 1.50644E-18 | 8.94754E-07 | 0.014750543 | 1.00886E-05 | -0.293443551 | -0.035555376 | NBPF18P, S100A11     |
| chr7  | 2611716   | 2612101   | 386  | * | 4  | 1.15697E-10 | 0.001293746 | 0.014801656 | 0.000978377 | 0.118368846  | 0.076288757  | IQCE                 |
| chr16 | 58031389  | 58032920  | 1532 | * | 5  | 9.87006E-12 | 6.58911E-05 | 0.014803433 | 0.00032815  | -0.235144212 | -0.083461712 | ZNF319               |
| chr17 | 694393    | 695156    | 764  | * | 3  | 2.80039E-10 | 0.00327408  | 0.014817062 | 0.00303167  | -0.127873111 | -0.010067095 | RNMTL1               |
| chr17 | 80056046  | 80056900  | 855  | * | 7  | 4.44021E-14 | 0.006242286 | 0.014826514 | 0.000670776 | -0.038161096 | -0.000471634 | FASN                 |
| chr4  | 75960115  | 75960138  | 24   | * | 2  | 9.53189E-08 | 0.001349981 | 0.014842532 | 0.002549573 | 0.080183773  | 0.078525291  | PARM1                |
| chr4  | 110624351 | 110625181 | 831  | * | 12 | 1.66246E-15 | 0.014304432 | 0.014865869 | 0.00367876  | -0.094553862 | -0.028703344 | CASP6                |
| chr20 | 60860733  | 60860984  | 252  | * | 3  | 2.47503E-08 | 0.001612018 | 0.014882935 | 0.002244631 | 0.13800797   | 0.089401156  | OSBPL2               |
| chr2  | 227771209 | 227771954 | 746  | * | 4  | 1.91814E-10 | 0.000191309 | 0.014883698 | 0.000506339 | 0.16451846   | 0.095550513  | RHBDD1               |
| chr12 | 6664536   | 6664872   | 337  | * | 2  | 3.3528E-08  | 0.016341331 | 0.014890947 | 0.015108844 | 0.025437054  | 0.018228065  | IFFO1                |
| chr15 | 81517541  | 81517758  | 218  | * | 5  | 6.45834E-10 | 0.01031956  | 0.014893041 | 0.0023324   | 0.172330892  | 0.080375604  | IL16                 |
| chr17 | 80969109  | 80969749  | 641  | * | 5  | 1.09262E-12 | 0.00131443  | 0.014913502 | 0.001293449 | -0.189173079 | -0.085270352 | B3GNTL1              |
| chr6  | 31025759  | 31026287  | 529  | * | 7  | 3.83177E-10 | 0.152236885 | 0.014916719 | 0.015236629 | -0.111692371 | -0.004706148 | HCG22                |
| chr7  | 75957040  | 75958048  | 1009 | * | 8  | 2.08933E-11 | 0.010615035 | 0.014923551 | 0.001307375 | 0.13506591   | 0.00033768   | YWHAG                |
| chr3  | 50379334  | 50380958  | 1625 | * | 7  | 1.88059E-13 | 1.43474E-05 | 0.014943404 | 5.76459E-05 | -0.155782382 | -0.019907366 | ZMYND10-AS1, ZMYND10 |
| chr18 | 13610632  | 13611576  | 945  | * | 13 | 7.93147E-14 | 0.215011516 | 0.014948855 | 0.032726995 | 0.162110015  | 0.04547079   | LDLRAD4, MIR4526     |
| chr10 | 114911413 | 114912080 | 668  | * | 6  | 1.27505E-13 | 0.00436296  | 0.01495992  | 0.001594254 | -0.161988914 | -0.060967691 | TCF7L2               |
| chr1  | 59249218  | 59250203  | 986  | * | 10 | 5.19076E-17 | 0.014815853 | 0.014985824 | 0.001065452 | -0.040205998 | -0.007159047 | JUN                  |
| chr10 | 98589334  | 98589349  | 16   | * | 2  | 2.66441E-08 | 0.001216469 | 0.01498688  | 0.002345302 | 0.139090677  | 0.132416062  |                      |
| chr1  | 202995853 | 202996541 | 689  | * | 5  | 9.21507E-10 | 0.004919113 | 0.014990188 | 0.005053867 | 0.084961212  | 0.030741714  | PPFIA4               |
| chr4  | 10686300  | 10686610  | 311  | * | 7  | 3.94278E-08 | 0.149667285 | 0.014990228 | 0.033170956 | -0.162915707 | -0.043041214 | CLNK                 |

|       |           |           |      |   |    |             |             |             |             |              |              |                              |
|-------|-----------|-----------|------|---|----|-------------|-------------|-------------|-------------|--------------|--------------|------------------------------|
| chr12 | 6960295   | 6961946   | 1652 | * | 22 | 6.19074E-16 | 0.182785997 | 0.014992076 | 0.016351951 | -0.117418118 | -0.007662075 | USP5, CDCA3                  |
| chr6  | 31689459  | 31693656  | 4198 | * | 39 | 1.82717E-26 | 2.26959E-07 | 0.015001815 | 7.83798E-08 | 0.190942336  | 0.064189465  | C6orf25, LY6G6C              |
| chr17 | 37349785  | 37351198  | 1414 | * | 7  | 6.09804E-13 | 5.30537E-05 | 0.015011214 | 4.19448E-05 | 0.153806396  | 0.075595959  | CACNB1                       |
| chr4  | 90033921  | 90033974  | 54   | * | 2  | 3.81762E-08 | 0.001248195 | 0.015012147 | 0.002396706 | 0.13718651   | 0.126602118  | TIGD2                        |
| chr17 | 40558061  | 40558245  | 185  | * | 3  | 3.85969E-08 | 0.093327602 | 0.015036689 | 0.013103911 | -0.192925906 | -0.10167084  | PTRF                         |
| chr21 | 40717570  | 40717775  | 206  | * | 3  | 9.56776E-09 | 0.001747386 | 0.015053819 | 0.002488621 | 0.081216698  | 0.065758412  | HMGN1                        |
| chr12 | 33591336  | 33591505  | 170  | * | 2  | 1.22962E-08 | 0.001270236 | 0.0150573   | 0.002433304 | 0.108454325  | 0.097880373  | SYT10                        |
| chr9  | 86594091  | 86594226  | 136  | * | 3  | 2.58387E-08 | 0.011929922 | 0.015085184 | 0.013320139 | -0.017996696 | -0.003582672 | HNRNPK                       |
| chr6  | 30068587  | 30071295  | 2709 | * | 40 | 1.2915E-31  | 0.007272695 | 0.015092985 | 0.001152499 | -0.289036243 | -0.016444961 | TRIM31                       |
| chr3  | 152016806 | 152017819 | 1014 | * | 6  | 4.74194E-11 | 0.288965095 | 0.015094383 | 0.027525519 | -0.10558238  | -0.047066358 | MBNL1                        |
| chr1  | 161128567 | 161129745 | 1179 | * | 16 | 4.19116E-11 | 0.365324093 | 0.015095573 | 0.11568813  | 0.05769414   | 0.011418132  | UFC1, USP21, RP11-297K8.2    |
| chr20 | 57607406  | 57608039  | 634  | * | 11 | 2.28841E-08 | 0.168082337 | 0.0151281   | 0.112658154 | 0.066470637  | 0.010322641  | ATP5E                        |
| chr6  | 138820503 | 138820840 | 338  | * | 4  | 2.94564E-09 | 0.000895721 | 0.015129828 | 0.001764118 | -0.06124985  | -0.040694794 | NHSL1                        |
| chr22 | 24236101  | 24237672  | 1572 | * | 16 | 2.5909E-15  | 0.014057435 | 0.015136926 | 0.002736173 | -0.049445983 | 0.003046994  | AP000350.10, MIF, AP000350.4 |
| chr14 | 20922685  | 20923814  | 1130 | * | 18 | 4.17001E-20 | 0.00049109  | 0.015160525 | 0.000301728 | -0.035658843 | 0.001832015  | APEX1, OSGEP                 |
| chr1  | 54562121  | 54562543  | 423  | * | 4  | 1.06148E-08 | 0.004965605 | 0.015199966 | 0.005589357 | -0.161596256 | -0.087475303 | TCEANC2                      |
| chr11 | 46298891  | 46299204  | 314  | * | 7  | 6.33324E-08 | 0.292784147 | 0.015201171 | 0.068933465 | 0.126952954  | 0.024561347  |                              |
| chr11 | 5265992   | 5266120   | 129  | * | 2  | 8.29149E-09 | 0.001107569 | 0.015201195 | 0.002176359 | 0.167702866  | 0.1439985    | CTD-2643I7.1                 |
| chr16 | 85256083  | 85256305  | 223  | * | 3  | 6.32921E-08 | 0.00218281  | 0.015208183 | 0.00362198  | 0.098402203  | 0.071554934  |                              |
| chr13 | 114005848 | 114006027 | 180  | * | 5  | 4.31401E-12 | 6.60965E-05 | 0.015220761 | 0.000290361 | 0.128197291  | 0.070610174  | GRTP1-AS1, GRTP1             |
| chr10 | 135202522 | 135203200 | 679  | * | 7  | 1.76261E-15 | 4.20177E-06 | 0.015328458 | 3.64943E-05 | -0.157565782 | -0.112631135 | PAOX                         |
| chr1  | 44114346  | 44116508  | 2163 | * | 17 | 1.10339E-14 | 0.000421249 | 0.015331696 | 9.49459E-05 | -0.170895131 | -0.021009378 | KDM4A                        |
| chr12 | 101603174 | 101604314 | 1141 | * | 16 | 7.31006E-11 | 0.306803457 | 0.015352961 | 0.058960686 | 0.09631736   | 0.030607927  | SLC5A8                       |
| chr5  | 70882722  | 70883447  | 726  | * | 11 | 3.24731E-11 | 0.022173513 | 0.015360583 | 0.011905328 | 0.078467218  | 0.012719829  | MCCC2                        |
| chr14 | 23445909  | 23446246  | 338  | * | 4  | 1.1007E-10  | 0.00107035  | 0.01536311  | 0.001448338 | -0.136539484 | -0.078764874 | RP11-298I3.5, AJUBA          |
| chr12 | 53692108  | 53692645  | 538  | * | 3  | 5.16563E-10 | 0.002959621 | 0.015364236 | 0.003717214 | -0.154050316 | -0.086231107 | PFDN5, RP11-680A11.5         |
| chr8  | 23382950  | 23383218  | 269  | * | 2  | 7.15626E-08 | 0.001783286 | 0.015368161 | 0.003224097 | -0.13342549  | -0.128037805 |                              |
| chr11 | 68227638  | 68228078  | 441  | * | 8  | 2.50675E-09 | 0.048681417 | 0.015370463 | 0.01910412  | -0.027845926 | 0.001230904  |                              |
| chr15 | 85523010  | 85525019  | 2010 | * | 14 | 5.02877E-15 | 0.000889421 | 0.015373244 | 0.001179754 | -0.04145176  | -0.004071702 | PDE8A                        |



|       |           |           |      |   |    |             |             |             |             |              |              |                     |
|-------|-----------|-----------|------|---|----|-------------|-------------|-------------|-------------|--------------|--------------|---------------------|
| chr3  | 150803295 | 150804490 | 1196 | * | 8  | 1.62544E-11 | 0.141388125 | 0.01537651  | 0.019161035 | -0.09487486  | -0.025128676 | MED12L              |
| chr3  | 142607280 | 142607715 | 436  | * | 4  | 5.05721E-08 | 0.251962146 | 0.015393386 | 0.081832792 | -0.058024539 | -0.011759368 | PCOLCE2             |
| chr5  | 891843    | 892529    | 687  | * | 5  | 1.04274E-10 | 0.009142037 | 0.015408881 | 0.006685969 | -0.121413645 | -0.049009125 | BRD9                |
| chr14 | 104171259 | 104171695 | 437  | * | 3  | 3.87808E-08 | 0.001315349 | 0.015424989 | 0.002746786 | -0.154233306 | 0.01174068   | XRCC3               |
| chr2  | 9142741   | 9143163   | 423  | * | 3  | 1.42916E-09 | 0.001194967 | 0.015440506 | 0.002319519 | -0.133344889 | -0.090601497 | MBOAT2              |
| chr1  | 111682392 | 111683302 | 911  | * | 10 | 3.35514E-16 | 0.017250627 | 0.015450078 | 0.001850081 | -0.082042205 | -0.025665496 | CEPT1, DRAM2        |
| chr8  | 77586264  | 77586439  | 176  | * | 3  | 7.35407E-08 | 0.004555033 | 0.015468322 | 0.006964826 | 0.051737202  | 0.034316045  | ZFH4-AS1            |
| chr13 | 114065669 | 114066074 | 406  | * | 3  | 4.78563E-08 | 0.059759419 | 0.015470803 | 0.021642712 | -0.194473623 | -0.028584934 |                     |
| chr9  | 128003255 | 128004142 | 888  | * | 11 | 1.58982E-12 | 0.005440506 | 0.015473536 | 0.003718973 | -0.045278532 | -0.002932998 | RP11-65N13.8, HSPA5 |
| chr17 | 54990662  | 54990833  | 172  | * | 2  | 1.73343E-10 | 0.003233808 | 0.01547632  | 0.005142095 | 0.025302084  | 0.021423423  | TRIM25              |
| chr18 | 5296331   | 5298430   | 2100 | * | 17 | 4.7847E-13  | 0.034668322 | 0.015483468 | 0.002535523 | -0.275339351 | -0.009457748 | ZBTB14              |
| chr11 | 1374851   | 1375657   | 807  | * | 5  | 3.00879E-10 | 0.002037034 | 0.015484061 | 0.001955731 | 0.103350902  | 0.033457969  |                     |
| chr19 | 11592764  | 11592958  | 195  | * | 3  | 5.42205E-08 | 0.006216159 | 0.015498879 | 0.006116791 | 0.039842376  | 0.021978661  | CTC-398G3.6         |
| chr9  | 136241865 | 136242381 | 517  | * | 3  | 1.34762E-09 | 0.00357909  | 0.015503537 | 0.003575562 | -0.182827022 | -0.059522013 | SURF4               |
| chr14 | 105155327 | 105155825 | 499  | * | 6  | 4.41065E-09 | 0.111954506 | 0.015533906 | 0.032414882 | -0.068898217 | -0.033923036 |                     |
| chr2  | 208104158 | 208104372 | 215  | * | 2  | 7.2275E-09  | 0.001165808 | 0.015543544 | 0.002282688 | -0.111987875 | -0.080463161 |                     |
| chr10 | 101945124 | 101946761 | 1638 | * | 16 | 3.46886E-18 | 0.00878762  | 0.0155646   | 0.001486993 | -0.133499113 | -0.000303508 | ERLIN1              |
| chr2  | 231789465 | 231789987 | 523  | * | 3  | 4.11814E-09 | 0.00208141  | 0.015602503 | 0.003177049 | -0.213077466 | -0.088748487 | GPR55               |
| chr2  | 172750661 | 172751245 | 585  | * | 12 | 3.11022E-13 | 0.009360798 | 0.015614782 | 0.002973819 | 0.036800888  | 0.01067349   | SLC25A12            |
| chr6  | 114291911 | 114292802 | 892  | * | 9  | 1.41541E-09 | 0.289101461 | 0.015626629 | 0.071350546 | 0.042684415  | 0.007294919  | RP3-399L15.3, HDAC2 |
| chr17 | 42977401  | 42977986  | 586  | * | 4  | 1.11285E-11 | 0.031278197 | 0.015628065 | 0.010857754 | -0.210137522 | -0.043364585 | CCDC103, FAM187A    |
| chr2  | 438948    | 439337    | 390  | * | 2  | 2.02526E-09 | 0.001910364 | 0.015647194 | 0.003423262 | 0.161856993  | 0.107760795  |                     |
| chr1  | 29587088  | 29587490  | 403  | * | 5  | 4.86284E-08 | 0.028975521 | 0.015658423 | 0.023436312 | 0.125750906  | 0.040283876  | PTPRU               |
| chr2  | 28112817  | 28114462  | 1646 | * | 24 | 7.22617E-16 | 0.003885642 | 0.015683189 | 0.001752574 | -0.104293537 | -0.008432896 | MRPL33, BRE, RBKS   |
| chr13 | 98959770  | 98959799  | 30   | * | 2  | 5.52836E-08 | 0.001362194 | 0.01569577  | 0.002602924 | 0.118928947  | 0.098932576  | FARP1               |
| chr20 | 57765315  | 57765489  | 175  | * | 3  | 1.33517E-08 | 0.003324211 | 0.015698208 | 0.003233434 | 0.136923873  | 0.054755668  |                     |
| chr12 | 110486280 | 110486573 | 294  | * | 6  | 5.48874E-08 | 0.012178985 | 0.015708542 | 0.01057496  | -0.042150773 | -0.013651033 | C12orf76            |
| chr3  | 10377872  | 10378056  | 185  | * | 4  | 2.28017E-08 | 0.030113451 | 0.015724323 | 0.00543198  | 0.114863924  | 0.055935143  | ATP2B2              |
| chr16 | 30381677  | 30382569  | 893  | * | 6  | 3.45257E-10 | 0.001200604 | 0.015735457 | 0.001887706 | 0.026496509  | 0.004491758  | MYLPF               |

|       |           |           |      |   |    |             |             |             |             |              |              |                                |
|-------|-----------|-----------|------|---|----|-------------|-------------|-------------|-------------|--------------|--------------|--------------------------------|
| chr1  | 228271035 | 228271368 | 334  | * | 3  | 5.55929E-09 | 0.059730902 | 0.015738244 | 0.00803533  | 0.034983926  | 0.016185747  | ARF1                           |
| chr2  | 200775554 | 200776533 | 980  | * | 7  | 1.13231E-10 | 0.003970605 | 0.015747784 | 0.002239648 | -0.050908165 | 0.000815245  | C2orf69, AC073043.1            |
| chr1  | 155159820 | 155160365 | 546  | * | 3  | 3.42165E-09 | 0.000501457 | 0.015774879 | 0.001212522 | 0.158129755  | 0.113927918  | MUC1                           |
| chr12 | 15782193  | 15782294  | 102  | * | 2  | 1.33823E-07 | 0.001183224 | 0.015787052 | 0.002319099 | 0.135973738  | 0.124281881  | EPS8                           |
| chr12 | 112819476 | 112819495 | 20   | * | 2  | 1.33941E-07 | 0.058453554 | 0.015787748 | 0.029405768 | 0.024409714  | 0.004665581  | HECTD4                         |
| chr7  | 6212481   | 6213211   | 731  | * | 6  | 1.39162E-12 | 0.005479276 | 0.015812024 | 0.001390134 | -0.136151822 | 0.00567603   | CYTH3                          |
| chr12 | 113376260 | 113376681 | 422  | * | 6  | 1.08298E-08 | 0.158903026 | 0.015816281 | 0.018490157 | 0.032171399  | 0.011442007  | OAS3, RP1-71H24.1              |
| chr2  | 11123476  | 11123616  | 141  | * | 3  | 7.36941E-08 | 0.001478807 | 0.015816953 | 0.002594553 | 0.184870183  | 0.109944842  |                                |
| chr14 | 58862146  | 58863362  | 1217 | * | 14 | 1.83166E-20 | 0.004091036 | 0.015817965 | 0.000100983 | 0.141125474  | 0.027468245  | TOMM20L, RP11-517O13.3         |
| chr5  | 175200401 | 175200576 | 176  | * | 4  | 2.09855E-10 | 0.001306405 | 0.015825204 | 0.000955955 | 0.116821905  | 0.069174543  |                                |
| chr18 | 19756582  | 19757468  | 887  | * | 5  | 1.2112E-10  | 0.012467423 | 0.015845313 | 0.003573719 | -0.072127766 | -0.041469906 | GATA6, RP11-627G18.2           |
| chr1  | 147142184 | 147142420 | 237  | * | 4  | 2.62312E-09 | 0.017031598 | 0.015858282 | 0.004704954 | 0.024558445  | 0.012461282  | ACP6                           |
| chr9  | 114423570 | 114423680 | 111  | * | 5  | 1.06344E-07 | 0.022334446 | 0.015869735 | 0.014705014 | 0.018514852  | 0.011987114  | DNAJC25, DNAJC25-GNG10, GNG10  |
| chr12 | 6487052   | 6487113   | 62   | * | 4  | 4.78077E-09 | 0.033482889 | 0.015880474 | 0.004538838 | 0.122016016  | 0.079023413  | LTBR                           |
| chr11 | 47416886  | 47417832  | 947  | * | 6  | 1.2589E-12  | 0.002814443 | 0.015884524 | 0.002457863 | -0.207101678 | -0.055653554 | RP11-750H9.5                   |
| chr5  | 14870749  | 14871921  | 1173 | * | 9  | 1.06215E-12 | 0.111948497 | 0.015901989 | 0.013354023 | 0.14335898   | 0.014406484  | ANKH                           |
| chr2  | 103352296 | 103352342 | 47   | * | 2  | 1.01179E-07 | 0.002289182 | 0.015909137 | 0.003970061 | -0.141672227 | -0.114004441 | MFSD9                          |
| chr2  | 111879378 | 111879843 | 466  | * | 3  | 1.0266E-11  | 0.014399374 | 0.015909185 | 0.005291352 | 0.041191763  | 0.027541239  | BCL2L11                        |
| chr16 | 81812336  | 81812765  | 430  | * | 7  | 5.64894E-10 | 0.005977347 | 0.015911104 | 0.006690899 | 0.071466432  | 0.020725497  | PLCG2                          |
| chr19 | 55866087  | 55866677  | 591  | * | 10 | 2.52306E-08 | 0.345901501 | 0.015913255 | 0.077566899 | 0.060817764  | 0.011869688  | COX6B2, CTD-2105E13.6, FAM71E2 |
| chr2  | 198364115 | 198365671 | 1557 | * | 24 | 2.9521E-14  | 0.199659033 | 0.015950886 | 0.085484176 | -0.132961409 | -0.018560225 | HSPE1, HSPE1-MOB4, HSPD1       |
| chr17 | 43049442  | 43049895  | 454  | * | 2  | 5.0789E-08  | 0.001208158 | 0.015956434 | 0.00236539  | 0.099110906  | 0.097530533  |                                |
| chr16 | 81678497  | 81678968  | 472  | * | 7  | 2.27273E-12 | 0.01854252  | 0.015963993 | 0.003169966 | 0.158702099  | 0.05350953   | CMIP                           |
| chr3  | 132378605 | 132380190 | 1586 | * | 17 | 9.97924E-14 | 0.102647847 | 0.015973657 | 0.004450502 | -0.264812118 | -0.014621148 | UBA5, ACAD11, NPHP3            |
| chr16 | 4012936   | 4014295   | 1360 | * | 8  | 2.12242E-13 | 0.006999341 | 0.015981939 | 0.001379287 | 0.15890497   | 0.051713375  | ADCY9                          |
| chr9  | 139640053 | 139640661 | 609  | * | 4  | 7.03249E-09 | 0.05325921  | 0.015993321 | 0.009441517 | 0.14817225   | 0.071214031  | LCN6, LCN6                     |
| chr1  | 179851994 | 179852419 | 426  | * | 3  | 3.00455E-08 | 0.00869491  | 0.016015125 | 0.01035232  | 0.021739312  | 0.014995713  | TOR1AIP1                       |
| chr11 | 62312720  | 62313983  | 1264 | * | 6  | 1.61377E-10 | 0.000894325 | 0.016019623 | 0.001471482 | -0.056875401 | 9.24272E-05  | RP11-864I4.4, AHNAK            |
| chr4  | 47839218  | 47839283  | 66   | * | 2  | 2.29973E-08 | 0.002279742 | 0.016025329 | 0.003965233 | 0.017620744  | 0.016463845  | CORIN                          |

|       |           |           |      |   |    |             |             |             |             |              |              |                      |
|-------|-----------|-----------|------|---|----|-------------|-------------|-------------|-------------|--------------|--------------|----------------------|
| chr17 | 3871303   | 3872569   | 1267 | * | 4  | 5.69782E-08 | 6.52642E-05 | 0.016027104 | 0.000266589 | 0.118840896  | 0.05645291   |                      |
| chr10 | 23003092  | 23003653  | 562  | * | 5  | 1.66835E-11 | 0.003823291 | 0.016028579 | 0.00304798  | 0.029276288  | 0.008518524  | PIP4K2A              |
| chr14 | 52781184  | 52781800  | 617  | * | 3  | 1.33769E-10 | 0.001533124 | 0.016030206 | 0.002978067 | 0.041402208  | 0.023230537  | PTGER2               |
| chr16 | 3332644   | 3333497   | 854  | * | 12 | 1.88867E-13 | 0.012558861 | 0.016033725 | 0.001993907 | 0.019103267  | 0.000951701  | ZNF263               |
| chr3  | 160167317 | 160167507 | 191  | * | 2  | 6.98434E-08 | 0.352961836 | 0.016034327 | 0.045834557 | -0.060574582 | -0.03103934  | RP11-432B6.3, TRIM59 |
| chr2  | 109223537 | 109223691 | 155  | * | 2  | 1.70437E-09 | 0.001241565 | 0.016041891 | 0.002422633 | 0.186467804  | 0.124977248  | LIMS1                |
| chr4  | 39978799  | 39980114  | 1316 | * | 9  | 1.12335E-12 | 0.000215014 | 0.016074961 | 0.000299215 | -0.068307993 | -0.005908324 | PDS5A                |
| chr13 | 45885329  | 45885891  | 563  | * | 6  | 1.68001E-09 | 0.001790453 | 0.016077762 | 0.003731366 | 0.021920359  | 0.007628937  |                      |
| chr14 | 50087420  | 50088260  | 841  | * | 7  | 2.78453E-11 | 0.009144305 | 0.016082413 | 0.007728686 | 0.020594995  | -0.000137147 | MGAT2, RP11-649E7.5  |
| chr17 | 72731453  | 72732432  | 980  | * | 4  | 1.74604E-11 | 0.000886854 | 0.016128649 | 0.001011728 | -0.174730924 | -0.095033523 | RAB37                |
| chr1  | 203764137 | 203766628 | 2492 | * | 15 | 3.17475E-12 | 0.000112717 | 0.016134448 | 0.000213112 | -0.215808407 | -0.035251456 | ZC3H11A, ZBED6       |
| chr17 | 39769012  | 39769294  | 283  | * | 5  | 1.89976E-08 | 0.019505074 | 0.016139117 | 0.008975145 | -0.121668815 | -0.074234578 | KRT16                |
| chr12 | 117468061 | 117468529 | 469  | * | 4  | 1.01521E-09 | 0.003565618 | 0.016139483 | 0.003476494 | 0.149905015  | 0.082045481  | FBXW8                |
| chr20 | 33734406  | 33735232  | 827  | * | 10 | 2.03561E-10 | 0.126119585 | 0.016139812 | 0.051474173 | -0.058125547 | -0.005612467 | EDEM2                |
| chr5  | 137089872 | 137090202 | 331  | * | 7  | 9.11738E-08 | 0.539395686 | 0.016148425 | 0.140297599 | -0.069991139 | -0.020144838 | HNRNPA0              |
| chr2  | 99124870  | 99125292  | 423  | * | 4  | 2.00359E-09 | 0.016800064 | 0.016180845 | 0.002012903 | 0.11660408   | -0.011912696 | INPP4A               |
| chr10 | 5727416   | 5727477   | 62   | * | 2  | 6.71799E-08 | 0.004804413 | 0.016193872 | 0.007003136 | -0.031891408 | -0.003136567 | FAM208B              |
| chr15 | 70994404  | 70995014  | 611  | * | 8  | 1.359E-14   | 0.00544608  | 0.016218395 | 0.000463952 | 0.095015208  | 0.044271691  | UACA                 |
| chr15 | 42840643  | 42842330  | 1688 | * | 15 | 4.46554E-14 | 0.004500553 | 0.016230347 | 0.002069345 | -0.205064373 | -0.018878977 | HAUS2, LRRC57        |
| chr9  | 139922545 | 139922595 | 51   | * | 2  | 5.48685E-09 | 0.002278232 | 0.016246159 | 0.003978319 | 0.039598034  | 0.029200568  | C9orf139, ABCA2      |
| chr17 | 58155376  | 58155868  | 493  | * | 2  | 2.49649E-09 | 0.001257582 | 0.016255753 | 0.002455911 | -0.045963807 | -0.010668044 | HEATR6               |
| chr1  | 1208426   | 1208573   | 148  | * | 2  | 2.20674E-08 | 0.002884632 | 0.016259695 | 0.004784697 | 0.031802176  | 0.025472976  | UBE2J2               |
| chr12 | 46776356  | 46776835  | 480  | * | 4  | 7.58857E-09 | 0.232861771 | 0.016259903 | 0.018084039 | 0.116631721  | 0.042221462  |                      |
| chr1  | 159823687 | 159825173 | 1487 | * | 10 | 2.96172E-14 | 0.002271914 | 0.01627783  | 0.000450039 | -0.109652595 | -0.028268734 | C1orf204, VSIG8      |
| chr6  | 82957093  | 82958324  | 1232 | * | 14 | 3.95128E-24 | 5.0728E-06  | 0.016308429 | 5.20195E-06 | -0.194151322 | -0.025544155 | IBTK                 |
| chr2  | 127412692 | 127414108 | 1417 | * | 13 | 3.50782E-23 | 4.79649E-05 | 0.016316685 | 1.71378E-05 | -0.185098809 | -0.05130152  | GYPC                 |
| chr2  | 220107847 | 220108496 | 650  | * | 8  | 6.5935E-14  | 9.98691E-05 | 0.016316935 | 0.00043238  | -0.252540383 | -0.130174547 | GLB1L                |
| chr7  | 112089544 | 112091280 | 1737 | * | 16 | 5.53858E-18 | 0.000235202 | 0.016346116 | 0.000176481 | 0.169078104  | 0.003701639  | IFRD1                |
| chr7  | 139875917 | 139876578 | 662  | * | 4  | 6.6827E-12  | 0.000773885 | 0.016371976 | 0.000856497 | 0.04247244   | 0.007227546  | KDM7A                |

|       |           |           |      |   |    |             |             |             |             |              |              |                     |
|-------|-----------|-----------|------|---|----|-------------|-------------|-------------|-------------|--------------|--------------|---------------------|
| chr15 | 91565312  | 91565459  | 148  | * | 3  | 4.8742E-08  | 0.06665669  | 0.016375765 | 0.029374185 | 0.02291919   | 0.012030089  | VPS33B              |
| chr11 | 118763674 | 118764491 | 818  | * | 9  | 1.15812E-12 | 0.051716226 | 0.016376081 | 0.006132987 | 0.144622353  | 0.036397561  | CXCR5               |
| chr18 | 67136810  | 67137182  | 373  | * | 4  | 1.5698E-11  | 0.000151691 | 0.0164014   | 0.000444661 | 0.13419822   | 0.091673044  | DOK6, RP11-465I4.3  |
| chr1  | 19043507  | 19043598  | 92   | * | 3  | 2.46083E-08 | 0.000856664 | 0.016409944 | 0.001757722 | 0.072897728  | 0.04101587   | PAX7                |
| chr7  | 100701511 | 100701574 | 64   | * | 3  | 2.81664E-08 | 0.006079031 | 0.016425102 | 0.004792871 | 0.117026048  | 0.076604196  | MUC17               |
| chr1  | 212780243 | 212780517 | 275  | * | 2  | 5.14996E-08 | 0.002762714 | 0.016425552 | 0.004641476 | -0.044593298 | -0.012194855 | ATF3                |
| chr14 | 21979151  | 21980058  | 908  | * | 11 | 3.48467E-11 | 0.115412837 | 0.016474281 | 0.02535025  | 0.041722092  | -0.007682801 | METTL3              |
| chr1  | 26685715  | 26685827  | 113  | * | 2  | 3.75586E-08 | 0.001291972 | 0.016483374 | 0.002519534 | -0.124744344 | -0.117813906 |                     |
| chr6  | 151258337 | 151258520 | 184  | * | 3  | 2.97972E-08 | 0.001360693 | 0.016485222 | 0.002777233 | -0.174776623 | -0.137977769 | MTHFD1L             |
| chr6  | 36237828  | 36238410  | 583  | * | 7  | 1.96419E-10 | 0.008027678 | 0.016485876 | 0.006990656 | 0.129517174  | 0.066034514  | PNPLA1              |
| chr14 | 64854366  | 64855287  | 922  | * | 14 | 3.71576E-18 | 0.073604631 | 0.016488468 | 0.004094814 | 0.035322338  | 0.003620625  | MTHFD1              |
| chr12 | 127212034 | 127212528 | 495  | * | 4  | 5.92101E-09 | 0.005403565 | 0.016491974 | 0.004171083 | 0.112626123  | 0.044799476  | LINC00943           |
| chr6  | 52225658  | 52227260  | 1603 | * | 11 | 1.19315E-15 | 0.00084682  | 0.016515164 | 0.000603491 | -0.16526927  | -0.016891697 | PAQR8               |
| chr2  | 220252215 | 220252856 | 642  | * | 8  | 1.88258E-10 | 0.019784242 | 0.016516244 | 0.012585383 | -0.081171036 | -0.013184256 | DNPEP               |
| chr12 | 96587734  | 96588210  | 477  | * | 8  | 3.25716E-08 | 0.267035284 | 0.016520773 | 0.041068767 | -0.071626361 | -0.017149825 | ELK3                |
| chr16 | 85963932  | 85964550  | 619  | * | 4  | 3.7505E-09  | 0.007132757 | 0.016538554 | 0.004473402 | -0.219505819 | -0.11088762  |                     |
| chr15 | 92005137  | 92005193  | 57   | * | 3  | 1.55945E-07 | 0.003718908 | 0.016557293 | 0.003859277 | 0.103698617  | 0.071261816  | RP11-661P17.1       |
| chr10 | 90031307  | 90031655  | 349  | * | 3  | 1.78241E-08 | 0.000708228 | 0.016560432 | 0.001684827 | 0.118973189  | 0.052655824  |                     |
| chr10 | 30331680  | 30331911  | 232  | * | 3  | 8.07736E-09 | 0.00977737  | 0.016561149 | 0.004696704 | 0.132534958  | 0.075446027  | KIAA1462            |
| chr4  | 1593537   | 1595726   | 2190 | * | 11 | 4.00824E-12 | 1.43766E-05 | 0.016583083 | 2.64781E-05 | 0.133023086  | 0.070976414  |                     |
| chr20 | 61436671  | 61437268  | 598  | * | 9  | 5.49871E-10 | 0.243537696 | 0.016596913 | 0.039863321 | -0.14456653  | -0.00733619  | OGFR, OGFR-AS1      |
| chr11 | 70265910  | 70266299  | 390  | * | 6  | 2.02865E-13 | 0.000119318 | 0.016612199 | 0.000187361 | 0.106598093  | 0.077558426  | CTTN                |
| chr5  | 134787465 | 134788128 | 664  | * | 4  | 3.28847E-11 | 0.002628339 | 0.016636928 | 0.001783756 | -0.121981324 | -0.044772563 | CTB-138E5.1, TIFAB  |
| chr11 | 124615853 | 124616925 | 1073 | * | 8  | 8.55135E-13 | 0.001256603 | 0.016638962 | 0.000450195 | -0.127943695 | -0.035841635 | NRGN, RP11-677M14.2 |
| chr12 | 132269563 | 132270218 | 656  | * | 6  | 2.41111E-15 | 0.001278572 | 0.016648757 | 0.000342038 | 0.129559791  | 0.076218747  | SFSWAP              |
| chr1  | 2162682   | 2162931   | 250  | * | 3  | 3.4235E-08  | 0.016001117 | 0.01665459  | 0.010804987 | 0.182238719  | 0.115246044  | SKI                 |
| chr6  | 167188846 | 167189543 | 698  | * | 5  | 3.04118E-10 | 0.003138502 | 0.016657828 | 0.003473391 | 0.104231161  | 0.037258622  | RPS6KA2             |
| chr1  | 150130379 | 150131579 | 1201 | * | 6  | 5.71083E-09 | 0.001456816 | 0.016662342 | 0.000696749 | 0.137204293  | 0.07631741   | PLEKHO1             |
| chr1  | 33219158  | 33220450  | 1293 | * | 10 | 1.56825E-10 | 0.034459398 | 0.016662634 | 0.005643061 | -0.176014404 | -0.006798544 | KIAA1522            |

|       |           |           |      |   |    |             |             |             |             |              |              |                              |
|-------|-----------|-----------|------|---|----|-------------|-------------|-------------|-------------|--------------|--------------|------------------------------|
| chr3  | 27763266  | 27764052  | 787  | * | 8  | 1.20125E-08 | 0.531763139 | 0.016667765 | 0.110809172 | 0.018800566  | 0.004793818  | EOMES                        |
| chr16 | 79633542  | 79633911  | 370  | * | 5  | 4.59863E-13 | 9.07397E-05 | 0.016685441 | 0.000432965 | 0.038408996  | 0.014538911  | MAF                          |
| chr12 | 122230972 | 122232994 | 2023 | * | 13 | 4.03898E-18 | 0.000208955 | 0.016689621 | 9.51965E-05 | -0.064260315 | -0.000830567 | RHOF                         |
| chr16 | 15766017  | 15766418  | 402  | * | 4  | 4.3094E-10  | 0.003756839 | 0.016695404 | 0.002727278 | -0.104370779 | -0.064278912 | NDE1                         |
| chr9  | 71393662  | 71393959  | 298  | * | 3  | 6.56389E-12 | 0.000197569 | 0.016699393 | 0.000638123 | 0.112571943  | 0.077243726  | PIP5K1B                      |
| chr12 | 6745057   | 6746030   | 974  | * | 14 | 2.5544E-28  | 1.99058E-10 | 0.016701722 | 1.77873E-08 | 0.204196475  | 0.097961164  | LPAR5                        |
| chr17 | 79428036  | 79428142  | 107  | * | 2  | 4.39111E-08 | 0.001490265 | 0.016727512 | 0.002845292 | -0.194961962 | -0.184523639 | RP11-1055B8.7, RP11-1055B8.8 |
| chr14 | 95942049  | 95942666  | 618  | * | 5  | 1.17007E-09 | 0.04405284  | 0.016759113 | 0.004152194 | -0.117556193 | -0.051109961 | SYNE3                        |
| chr17 | 643533    | 643676    | 144  | * | 3  | 1.00697E-07 | 0.006462136 | 0.016759588 | 0.004267661 | -0.147856108 | -0.087942315 | FAM57A                       |
| chr19 | 49576955  | 49577303  | 349  | * | 5  | 1.5583E-10  | 0.164124589 | 0.016767164 | 0.006613739 | 0.158757691  | 0.081739806  |                              |
| chr14 | 105902718 | 105903354 | 637  | * | 3  | 6.62599E-10 | 0.000229784 | 0.016767438 | 0.000731604 | 0.176957359  | 0.102733915  | TEX22, MTA1                  |
| chr7  | 6629452   | 6630190   | 739  | * | 6  | 1.7471E-11  | 0.011578232 | 0.016767819 | 0.006073436 | 0.02964428   | 0.009478148  | C7orf26                      |
| chr10 | 135193212 | 135193704 | 493  | * | 6  | 2.53394E-10 | 0.110813484 | 0.016777412 | 0.015375399 | 0.121176312  | 0.046578989  | PAOX                         |
| chr8  | 95906921  | 95908119  | 1199 | * | 11 | 7.83495E-11 | 0.034520256 | 0.016790726 | 0.007576752 | -0.070464565 | -0.009230554 | NDUFAF6, CCNE2               |
| chr17 | 7757933   | 7761357   | 3425 | * | 35 | 1.14721E-21 | 0.013472525 | 0.016792526 | 2.3589E-05  | 0.13689174   | 0.019686809  | KDM6B, TMEM88, CYB5D1, LSMD1 |
| chr1  | 227127636 | 227128537 | 902  | * | 7  | 4.17392E-11 | 0.019890691 | 0.016797335 | 0.003429132 | 0.041777526  | 0.015019424  | ADCK3                        |
| chr12 | 57472074  | 57472922  | 849  | * | 12 | 2.85134E-21 | 6.24443E-05 | 0.016797677 | 2.43424E-05 | -0.048831029 | -0.025730632 | TMEM194A                     |
| chr6  | 12956438  | 12956489  | 52   | * | 2  | 1.19893E-07 | 0.001678994 | 0.016811334 | 0.003141281 | 0.105835149  | 0.101843266  | PHACTR1                      |
| chr3  | 188286217 | 188287006 | 790  | * | 6  | 1.58116E-09 | 0.142475142 | 0.016822612 | 0.02109727  | -0.155992569 | -0.037908225 | LPP, LPP-AS1                 |
| chr1  | 247171234 | 247171886 | 653  | * | 11 | 1.14332E-11 | 0.043173544 | 0.016826369 | 0.00643471  | -0.097522963 | -0.017682102 | ZNF695, ZNF670               |
| chr7  | 135346500 | 135347238 | 739  | * | 9  | 7.5511E-09  | 0.579477321 | 0.016829004 | 0.139985429 | -0.106604785 | -0.012386258 |                              |
| chr1  | 154947991 | 154948144 | 154  | * | 2  | 1.06465E-08 | 0.001525391 | 0.01683348  | 0.00290472  | -0.040849084 | -0.011252655 | CKS1B                        |
| chr15 | 43621948  | 43622988  | 1041 | * | 16 | 1.15365E-11 | 0.101506082 | 0.01685894  | 0.065782151 | 0.038559574  | 0.004913078  | ADAL, LCMT2                  |
| chr19 | 41595975  | 41596066  | 92   | * | 3  | 1.95643E-08 | 0.000716775 | 0.016860073 | 0.001804046 | 0.048939235  | 0.039972761  | CYP2A13                      |
| chr7  | 157475548 | 157475737 | 190  | * | 3  | 2.906E-10   | 0.02723731  | 0.01686744  | 0.005848667 | 0.11132337   | 0.045120193  | PTPRN2                       |
| chr3  | 179040370 | 179041226 | 857  | * | 7  | 9.93316E-10 | 0.127089225 | 0.01688094  | 0.006461091 | -0.362840595 | -0.046418726 | ZNF639                       |
| chr16 | 50730221  | 50730737  | 517  | * | 3  | 4.33243E-11 | 0.001885386 | 0.016884176 | 0.002652919 | -0.09455682  | -0.039014063 | NOD2                         |
| chr6  | 15090163  | 15090384  | 222  | * | 4  | 7.89255E-09 | 0.00911909  | 0.016908407 | 0.004590066 | -0.244180814 | -0.123507988 | RP11-146I2.1                 |
| chr19 | 53030705  | 53031511  | 807  | * | 9  | 2.68258E-11 | 0.013697052 | 0.016920417 | 0.005372776 | 0.056662473  | 0.013290673  | ZNF808                       |

|       |           |           |      |   |    |             |             |             |             |              |              |                      |
|-------|-----------|-----------|------|---|----|-------------|-------------|-------------|-------------|--------------|--------------|----------------------|
| chr3  | 194877106 | 194877369 | 264  | * | 3  | 1.1675E-07  | 0.009318971 | 0.016930299 | 0.011301933 | 0.145161173  | 0.07318766   | XXYL1                |
| chr17 | 12921492  | 12921796  | 305  | * | 4  | 1.27024E-07 | 0.112656506 | 0.016939216 | 0.0138296   | -0.093513414 | -0.032055862 | ELAC2                |
| chr6  | 29973407  | 29974022  | 616  | * | 3  | 7.21175E-10 | 0.003065974 | 0.016952291 | 0.004607617 | -0.154726367 | -0.098637665 | ZNRD1-AS1, HCG4P3    |
| chr5  | 142782415 | 142784982 | 2568 | * | 24 | 1.8494E-19  | 9.24364E-05 | 0.016960445 | 4.49702E-05 | -0.109683328 | -0.019437402 | NR3C1                |
| chr15 | 63414256  | 63415064  | 809  | * | 5  | 2.1515E-10  | 0.00750957  | 0.01696068  | 0.006530316 | 0.0694832    | -0.002507269 | LACTB                |
| chr10 | 72136860  | 72137020  | 161  | * | 3  | 1.33863E-08 | 0.001824788 | 0.016989807 | 0.00286476  | 0.121175545  | 0.101395652  | LRRC20               |
| chr16 | 67891976  | 67892349  | 374  | * | 2  | 7.73089E-08 | 0.031366945 | 0.016993291 | 0.023142781 | 0.067596447  | 0.056952221  | NUTF2                |
| chr6  | 31939280  | 31941422  | 2143 | * | 52 | 3.90354E-25 | 0.012733419 | 0.016995851 | 0.005626356 | 0.187654316  | 0.010510168  | STK19, DXO           |
| chr1  | 160068178 | 160069109 | 932  | * | 19 | 1.14887E-16 | 0.195033464 | 0.017014049 | 0.023599959 | -0.084215135 | -0.022961994 | IGSF8                |
| chr1  | 40419558  | 40419793  | 236  | * | 2  | 1.75086E-11 | 0.001372254 | 0.017015137 | 0.002668081 | 0.08074356   | 0.069562835  |                      |
| chr20 | 35917127  | 35917924  | 798  | * | 6  | 1.11815E-09 | 0.005785051 | 0.017030551 | 0.004203444 | -0.165917906 | -0.035630969 |                      |
| chr8  | 17767590  | 17768115  | 526  | * | 7  | 1.53877E-10 | 0.007608345 | 0.017036221 | 0.004801281 | -0.104524537 | -0.052217836 | FGL1                 |
| chr1  | 27668058  | 27668556  | 499  | * | 8  | 5.06763E-17 | 2.21862E-06 | 0.017041599 | 2.9603E-05  | -0.181948497 | -0.062192111 | SYTL1                |
| chr16 | 11890465  | 11890746  | 282  | * | 3  | 1.3985E-08  | 0.003101746 | 0.017055151 | 0.005553476 | -0.046380646 | -0.025734975 | ZC3H7A               |
| chr14 | 51561293  | 51561618  | 326  | * | 4  | 7.78159E-09 | 0.221687595 | 0.017055444 | 0.015247733 | 0.046316122  | 0.014459426  | TRIM9                |
| chr22 | 24407474  | 24407907  | 434  | * | 7  | 6.31917E-08 | 0.07585263  | 0.017068734 | 0.049594875 | 0.044068321  | 0.008168744  | CABIN1               |
| chr6  | 30103459  | 30105198  | 1740 | * | 13 | 2.21443E-17 | 0.001821348 | 0.017143448 | 0.000114428 | 0.171838407  | 0.055545548  | TRIM40               |
| chr19 | 54604098  | 54604200  | 103  | * | 4  | 6.52927E-08 | 0.032880335 | 0.017192311 | 0.008370655 | -0.128998135 | -0.053781633 | OSCAR                |
| chr16 | 56333966  | 56334484  | 519  | * | 5  | 3.55747E-08 | 0.019993221 | 0.017290981 | 0.012335883 | 0.141416279  | 0.060747199  | GNAO1                |
| chr12 | 12503186  | 12504089  | 904  | * | 10 | 7.26944E-13 | 0.021472905 | 0.017296771 | 0.002791606 | -0.090310283 | -0.012791914 | MANSC1               |
| chr5  | 59995354  | 59995837  | 484  | * | 4  | 2.05545E-11 | 0.001950956 | 0.017297422 | 0.001703234 | 0.034631986  | 0.019633787  | DEPDC1B              |
| chr12 | 121890311 | 121890503 | 193  | * | 3  | 7.46401E-08 | 0.003027249 | 0.017335146 | 0.005111117 | 0.114195995  | 0.089778806  | KDM2B                |
| chr14 | 67878535  | 67879385  | 851  | * | 13 | 1.87607E-16 | 0.014051234 | 0.017344709 | 0.001558899 | 0.233172591  | 0.047501303  | PLEK2                |
| chr18 | 59854373  | 59855274  | 902  | * | 7  | 1.43177E-10 | 0.04920131  | 0.017359137 | 0.010348224 | -0.030662356 | -0.007490919 | KIAA1468             |
| chr19 | 4152810   | 4153713   | 904  | * | 8  | 3.96871E-13 | 0.002076823 | 0.017361495 | 0.001828902 | 0.156382455  | 0.044358918  | CREB3L3              |
| chr6  | 97371949  | 97372970  | 1022 | * | 10 | 2.70192E-11 | 0.173689429 | 0.017369201 | 0.014509668 | 0.073671499  | 0.008883866  | KLHL32               |
| chr11 | 31846819  | 31846849  | 31   | * | 3  | 2.003E-07   | 0.01170274  | 0.017376323 | 0.009802754 | 0.040524239  | 0.03046815   | RCN1                 |
| chr2  | 190524924 | 190526769 | 1846 | * | 15 | 1.74354E-15 | 0.009780583 | 0.017382132 | 0.000658337 | 0.089526509  | 0.003375995  | ASNSD1               |
| chr3  | 48884952  | 48885189  | 238  | * | 2  | 1.91989E-07 | 0.049493695 | 0.017397021 | 0.029144481 | 0.029581066  | 0.017341598  | PRKAR2A-AS1, PRKAR2A |

|       |           |           |      |   |    |             |             |             |             |              |              |                               |
|-------|-----------|-----------|------|---|----|-------------|-------------|-------------|-------------|--------------|--------------|-------------------------------|
| chr17 | 76274577  | 76274856  | 280  | * | 4  | 6.54721E-10 | 0.000479459 | 0.017447553 | 0.001106981 | -0.150775575 | -0.109044409 |                               |
| chr6  | 132811238 | 132811784 | 547  | * | 4  | 1.00588E-10 | 0.00119379  | 0.01749304  | 0.001186218 | 0.200773033  | 0.070164382  | STX7                          |
| chr2  | 119915368 | 119915729 | 362  | * | 3  | 1.01077E-07 | 0.00447377  | 0.017509844 | 0.007198228 | 0.078482887  | 0.053406743  | C1QL2                         |
| chr12 | 114232702 | 114232937 | 236  | * | 4  | 7.24124E-12 | 2.42656E-05 | 0.017511939 | 0.000137605 | 0.150385381  | 0.13096388   |                               |
| chr10 | 48416391  | 48417399  | 1009 | * | 12 | 2.74079E-18 | 0.007175516 | 0.017520297 | 0.000372296 | 0.194155048  | 0.063232291  | GDF2                          |
| chr5  | 82373222  | 82373944  | 723  | * | 13 | 1.11565E-13 | 0.065257337 | 0.017556012 | 0.016822668 | -0.050869501 | -0.008251352 | XRCC4, TMEM167A               |
| chr2  | 225792082 | 225792829 | 748  | * | 4  | 6.65708E-10 | 0.002393175 | 0.017571359 | 0.001129912 | -0.201101133 | 0.018482429  | DOCK10                        |
| chr8  | 1708438   | 1708447   | 10   | * | 2  | 5.32878E-08 | 0.001550053 | 0.017577147 | 0.002973447 | 0.114009247  | 0.113445864  | CLN8                          |
| chr19 | 6529614   | 6530704   | 1091 | * | 4  | 4.96662E-10 | 0.000104004 | 0.017600342 | 0.000399315 | 0.101058407  | 0.064943809  |                               |
| chr4  | 57684399  | 57685107  | 709  | * | 5  | 1.7134E-11  | 0.000165036 | 0.017602197 | 0.00028048  | 0.120744472  | 0.040518094  | SPINK2, Y_RNA                 |
| chr9  | 35675387  | 35676166  | 780  | * | 8  | 4.5391E-09  | 0.013151721 | 0.017610574 | 0.009846805 | 0.105382352  | 0.036335987  | CA9, ARHGEF39                 |
| chr4  | 41936041  | 41937393  | 1353 | * | 10 | 4.6545E-14  | 0.042103793 | 0.017616039 | 0.010756255 | -0.24603613  | -0.049393455 | TMEM33                        |
| chr7  | 100025489 | 100029306 | 3818 | * | 27 | 2.46062E-12 | 0.003975666 | 0.017627562 | 0.000257797 | -0.292109232 | -0.022580173 | MEPCE, ZCWPW1                 |
| chr13 | 41052081  | 41053032  | 952  | * | 3  | 1.60505E-08 | 0.020755055 | 0.017635633 | 0.011277085 | 0.135197485  | 0.09339068   | LINC00598                     |
| chr6  | 33171765  | 33173501  | 1737 | * | 28 | 1.60151E-18 | 0.04934977  | 0.017636709 | 0.00892821  | -0.147679787 | 0.010664633  | SLC39A7, HSD17B8              |
| chr2  | 198379881 | 198381500 | 1620 | * | 25 | 4.50077E-27 | 0.002481828 | 0.017642624 | 0.000209384 | -0.033643634 | -0.004383324 | HSPE1-MOB4, MOB4, HSPD1       |
| chr16 | 967350    | 967377    | 28   | * | 2  | 6.81743E-08 | 0.002146347 | 0.017658216 | 0.00388019  | -0.258199707 | -0.104916502 | LMF1                          |
| chr10 | 121301765 | 121302268 | 504  | * | 3  | 6.88261E-09 | 0.004743617 | 0.01772228  | 0.007622639 | -0.096463152 | -0.018678427 | RGS10                         |
| chr4  | 52709356  | 52709358  | 3    | * | 2  | 2.12575E-07 | 0.002016043 | 0.017728142 | 0.00369314  | -0.036042816 | -0.029117036 | DCUN1D4                       |
| chr9  | 136726359 | 136726575 | 217  | * | 3  | 3.44205E-10 | 0.000255939 | 0.017734599 | 0.000802161 | 0.139666095  | 0.116812391  | VAV2                          |
| chr7  | 90224886  | 90225365  | 480  | * | 5  | 3.68245E-09 | 0.04517545  | 0.017740567 | 0.006098776 | -0.053245362 | -0.03480667  | CDK14, AC002456.2             |
| chr6  | 30484334  | 30484429  | 96   | * | 2  | 9.25357E-09 | 0.002054785 | 0.017759658 | 0.003752027 | -0.061093482 | -0.055271429 | XXbac-BPG249D20.9             |
| chr22 | 31626484  | 31626752  | 269  | * | 3  | 2.41603E-08 | 0.004412967 | 0.017760045 | 0.004022336 | -0.090678741 | -0.053727058 | LIMK2                         |
| chr5  | 140998344 | 140998928 | 585  | * | 10 | 2.54277E-11 | 0.064240138 | 0.017777565 | 0.024136866 | -0.041390711 | -0.010266417 | AC008781.7, DIAPH1            |
| chr10 | 89420170  | 89420794  | 625  | * | 5  | 2.13045E-10 | 0.004074152 | 0.017787063 | 0.005313028 | 0.179625035  | 0.079898785  | PAPSS2                        |
| chr1  | 55353327  | 55353706  | 380  | * | 3  | 1.75979E-08 | 0.031227543 | 0.017800351 | 0.016467961 | -0.180742556 | -0.041226101 | RP11-67L3.5, RP11-67L3.4      |
| chr11 | 114270563 | 114271474 | 912  | * | 15 | 4.17521E-09 | 0.400474916 | 0.017837609 | 0.126334363 | 0.033989016  | 7.7935E-05   | RBM7, RP11-212D19.4, C11orf71 |
| chr13 | 50699716  | 50699887  | 172  | * | 6  | 8.30646E-08 | 0.025476062 | 0.017896359 | 0.027254595 | -0.067879001 | -0.027215518 | DLEU1, DLEU2                  |
| chr21 | 44312947  | 44313427  | 481  | * | 9  | 1.38069E-08 | 0.033463733 | 0.017913332 | 0.029064042 | 0.0240741    | 0.007450557  | NDUFV3                        |

|       |           |           |      |   |     |             |             |             |             |              |              |                                   |
|-------|-----------|-----------|------|---|-----|-------------|-------------|-------------|-------------|--------------|--------------|-----------------------------------|
| chr1  | 215255572 | 215255716 | 145  | * | 2   | 4.3551E-08  | 0.008069726 | 0.017913832 | 0.010490539 | 0.068451839  | 0.052312986  | KCNK2                             |
| chr5  | 79553147  | 79553606  | 460  | * | 4   | 1.62101E-09 | 0.004666189 | 0.017922666 | 0.002354646 | -0.138910877 | -0.049913437 |                                   |
| chr17 | 5290658   | 5290775   | 118  | * | 3   | 6.23659E-08 | 0.001189998 | 0.017959911 | 0.002645567 | -0.201982935 | -0.096363274 | NUP88                             |
| chr2  | 74757529  | 74757563  | 35   | * | 2   | 1.23331E-07 | 0.001909298 | 0.017964773 | 0.003545747 | 0.024647308  | 0.007648177  | HTRA2                             |
| chr5  | 10761669  | 10762626  | 958  | * | 5   | 4.02945E-11 | 0.000134719 | 0.017968816 | 0.000179585 | -0.113448481 | -0.048737802 | CTD-2154B17.4                     |
| chr6  | 110721305 | 110722253 | 949  | * | 4   | 1.91585E-08 | 0.001402655 | 0.017971337 | 0.00131314  | -0.201184051 | -0.063838798 | DDO                               |
| chr7  | 3083333   | 3083721   | 389  | * | 3   | 6.03002E-10 | 0.000317044 | 0.018019022 | 0.000963017 | 0.044420611  | 0.03030388   | CARD11                            |
| chr5  | 52095950  | 52096100  | 151  | * | 3   | 2.68124E-08 | 0.001162634 | 0.018022216 | 0.002608628 | 0.015377643  | 0.012242613  | ITGA1, PELO                       |
| chr2  | 121009176 | 121010281 | 1106 | * | 10  | 2.98635E-13 | 0.174559217 | 0.018023639 | 0.007148502 | -0.175777573 | -0.013734719 | RALB                              |
| chr1  | 46049433  | 46050509  | 1077 | * | 9   | 2.31935E-11 | 0.39668426  | 0.018028358 | 0.043968209 | 0.024143662  | 0.001027495  | NASP                              |
| chr19 | 37957601  | 37957760  | 160  | * | 3   | 1.33961E-08 | 0.001088419 | 0.018050835 | 0.002566184 | -0.069360388 | -0.029397492 | ZNF569                            |
| chr1  | 18956762  | 18957375  | 614  | * | 5   | 3.65777E-09 | 0.00927205  | 0.018069945 | 0.0032395   | 0.030221323  | 0.022293157  |                                   |
| chr17 | 62339926  | 62340143  | 218  | * | 4   | 6.19503E-08 | 0.111914587 | 0.018081828 | 0.021316973 | -0.120955828 | -0.03981979  | TEX2                              |
| chr6  | 32805398  | 32812953  | 7556 | * | 103 | 9.28823E-23 | 0.189259565 | 0.018082522 | 0.006368808 | 0.206236598  | 0.006063317  | TAPSAR1, PSMB9, TAP2, TAP2, PSMB8 |
| chr19 | 17000585  | 17001305  | 721  | * | 4   | 1.40574E-08 | 0.008343266 | 0.018094316 | 0.007823    | 0.130131964  | 0.072579333  | F2RL3                             |
| chr2  | 20550205  | 20552116  | 1912 | * | 13  | 9.51287E-13 | 0.000547132 | 0.0181011   | 0.000546389 | 0.123440496  | -0.002076635 | PUM2                              |
| chr19 | 50180204  | 50180436  | 233  | * | 7   | 1.37923E-07 | 0.062381273 | 0.018109526 | 0.026792476 | -0.056281626 | -0.006263791 | PRMT1                             |
| chr9  | 92097137  | 92097516  | 380  | * | 3   | 1.27852E-08 | 0.002852006 | 0.018144974 | 0.003402265 | 0.081798266  | 0.054133607  | SEMA4D                            |
| chr8  | 56903606  | 56904259  | 654  | * | 3   | 7.96147E-09 | 0.000226403 | 0.018157254 | 0.000738339 | -0.143869728 | -0.120536536 | LYN                               |
| chr9  | 90589798  | 90589971  | 174  | * | 7   | 1.13642E-07 | 0.010935426 | 0.018161529 | 0.019426031 | 0.069488449  | 0.03927819   |                                   |
| chr13 | 95355117  | 95355281  | 165  | * | 3   | 1.46028E-08 | 0.002015983 | 0.018166576 | 0.003903195 | 0.098815014  | 0.069036386  |                                   |
| chr10 | 134602228 | 134602530 | 303  | * | 3   | 1.04182E-07 | 0.002827048 | 0.018185239 | 0.003407671 | 0.052105371  | 0.042940413  |                                   |
| chr2  | 128458240 | 128458845 | 606  | * | 11  | 8.91486E-19 | 8.2448E-05  | 0.018185397 | 8.14977E-05 | 0.084704211  | 0.034144865  | SFT2D3, WDR33                     |
| chr6  | 32054561  | 32055738  | 1178 | * | 25  | 2.35948E-14 | 0.154617436 | 0.018188176 | 0.067137596 | 0.170327112  | 0.037463678  | TNXB                              |
| chr5  | 107005999 | 107006413 | 415  | * | 3   | 8.2603E-09  | 0.00715033  | 0.018195224 | 0.006415411 | 0.042384074  | 0.025822478  | EFNA5                             |
| chr12 | 109569059 | 109569180 | 122  | * | 5   | 3.17054E-09 | 0.008927602 | 0.018211527 | 0.003914446 | 0.124100309  | 0.072444462  | ACACB                             |
| chr16 | 3493133   | 3494155   | 1023 | * | 15  | 4.31391E-21 | 4.2029E-06  | 0.018212285 | 3.17079E-05 | -0.178712467 | -0.100404713 | NAA60, NAA60, ZNF597              |
| chr1  | 109849854 | 109850837 | 984  | * | 6   | 6.74672E-10 | 0.026073537 | 0.018217208 | 0.006636714 | 0.202280052  | 0.075297241  |                                   |
| chr20 | 61669194  | 61669380  | 187  | * | 5   | 1.55197E-09 | 0.031613058 | 0.018222788 | 0.007023926 | 0.1104171    | 0.051311537  | RP11-305P22.9, LINC01056          |



|       |           |           |      |   |    |             |             |             |             |              |              |                     |
|-------|-----------|-----------|------|---|----|-------------|-------------|-------------|-------------|--------------|--------------|---------------------|
| chr12 | 120884387 | 120884702 | 316  | * | 7  | 1.07017E-07 | 0.043580614 | 0.018237033 | 0.030565111 | 0.019774845  | 0.006938304  | AL021546.6, GATC    |
| chr3  | 107574971 | 107575062 | 92   | * | 2  | 1.63618E-07 | 0.001549243 | 0.018238075 | 0.002997642 | -0.149091711 | -0.138150406 | LINC00635           |
| chr15 | 65053596  | 65054317  | 722  | * | 4  | 8.22393E-10 | 0.032552467 | 0.018252022 | 0.003888021 | 0.089104266  | 0.066902308  | RBPMS2              |
| chr19 | 40324187  | 40324762  | 576  | * | 6  | 1.69802E-09 | 0.042660622 | 0.018261072 | 0.024342808 | -0.032720373 | 0.001271896  | DYRK1B              |
| chr8  | 101322518 | 101323246 | 729  | * | 7  | 2.99704E-11 | 0.127752149 | 0.018267303 | 0.013158196 | 0.164642561  | 0.04935228   | RNF19A              |
| chr6  | 151814565 | 151815241 | 677  | * | 11 | 1.46899E-13 | 0.019899856 | 0.018270342 | 0.006473345 | -0.297168929 | -0.014306416 | CCDC170             |
| chr2  | 85805621  | 85805631  | 11   | * | 2  | 1.78335E-08 | 0.00178404  | 0.018274546 | 0.00336885  | -0.044197803 | -0.036188482 | VAMP8               |
| chr12 | 32686638  | 32686645  | 8    | * | 2  | 8.37183E-08 | 0.001588663 | 0.018286552 | 0.003062526 | -0.064875674 | -0.052865978 | FGD4                |
| chr13 | 114825082 | 114825608 | 527  | * | 4  | 1.24394E-08 | 0.034435737 | 0.018295449 | 0.024293688 | 0.138243793  | 0.071140072  | RASA3               |
| chr10 | 38264940  | 38265215  | 276  | * | 2  | 6.2701E-08  | 0.050651412 | 0.01831041  | 0.030384648 | -0.035746616 | -0.021354371 | ZNF25               |
| chr12 | 98909434  | 98910308  | 875  | * | 9  | 7.22765E-16 | 0.000195045 | 0.018316501 | 0.000322227 | -0.062089702 | -0.018536737 | TMPO, TMPO-AS1      |
| chr14 | 95829909  | 95830175  | 267  | * | 5  | 1.39957E-09 | 0.001533788 | 0.018334472 | 0.00232611  | 0.137813934  | 0.074174428  |                     |
| chr5  | 55148279  | 55148974  | 696  | * | 4  | 9.89399E-09 | 0.005429142 | 0.01835092  | 0.003693455 | -0.194812235 | -0.118629147 | IL31RA              |
| chr20 | 43024441  | 43024748  | 308  | * | 3  | 5.28737E-10 | 0.000396876 | 0.018351379 | 0.001107286 | 0.158213488  | 0.113570538  | HNF4A               |
| chr11 | 67006774  | 67007811  | 1038 | * | 17 | 1.43474E-14 | 0.103758364 | 0.018355745 | 0.01047402  | -0.054970349 | -0.017580139 | KDM2A               |
| chr11 | 1912178   | 1912495   | 318  | * | 4  | 1.6714E-10  | 0.000710588 | 0.018361524 | 0.001550793 | -0.087408198 | -0.067493614 | LSP1                |
| chr6  | 33235504  | 33236353  | 850  | * | 13 | 7.3197E-14  | 0.341878965 | 0.018390631 | 0.031177658 | 0.180503093  | 0.025568306  | VPS52               |
| chr17 | 151914    | 152350    | 437  | * | 5  | 2.84696E-09 | 0.033061797 | 0.018392818 | 0.004237727 | 0.089690709  | 0.0610081    | RPH3AL              |
| chr20 | 10653164  | 10654831  | 1668 | * | 11 | 1.18E-11    | 0.001596985 | 0.018397449 | 0.000615323 | 0.027574232  | 0.009069636  | RP11-103J8.1, JAG1  |
| chr13 | 36044768  | 36045352  | 585  | * | 6  | 4.02053E-11 | 0.010776597 | 0.018439428 | 0.002324122 | 0.047972676  | 0.032791413  | NBEA                |
| chr1  | 33463340  | 33463882  | 543  | * | 3  | 2.36385E-09 | 0.000328487 | 0.01844922  | 0.000964874 | -0.133074723 | -0.099733974 | RP1-117O3.2         |
| chr6  | 150285026 | 150285475 | 450  | * | 5  | 8.11964E-09 | 0.012616562 | 0.018468677 | 0.007092892 | -0.060726641 | -0.002771763 | ULBP1               |
| chr16 | 19777410  | 19777742  | 333  | * | 3  | 3.49193E-08 | 0.001042581 | 0.018509456 | 0.002203222 | 0.328834181  | 0.182758763  | IQCK, CTD-2380F24.1 |
| chr3  | 127542959 | 127543047 | 89   | * | 2  | 2.62742E-09 | 0.001617126 | 0.018510899 | 0.003116612 | 0.13712616   | 0.110794733  |                     |
| chr16 | 29819361  | 29819572  | 212  | * | 5  | 3.63526E-08 | 0.209830775 | 0.018552101 | 0.014502687 | -0.110050218 | -0.044305247 | MAZ                 |
| chr9  | 139237366 | 139237889 | 524  | * | 4  | 6.41223E-09 | 0.005559907 | 0.018571567 | 0.00352697  | 0.170560441  | 0.014866654  | GPSP1               |
| chr8  | 114448998 | 114449487 | 490  | * | 9  | 1.85446E-09 | 0.039017526 | 0.01860805  | 0.02500782  | 0.045999632  | 0.008148185  | CSMD3               |
| chr13 | 23500752  | 23500838  | 87   | * | 2  | 1.39381E-07 | 0.005599424 | 0.018610767 | 0.008221354 | -0.068253735 | -0.045462764 |                     |
| chr6  | 6006770   | 6008642   | 1873 | * | 18 | 3.98713E-17 | 0.022609952 | 0.018622192 | 0.002508029 | 0.057019191  | 0.011921061  | NRN1                |

|       |           |           |      |   |    |             |             |             |             |              |              |                   |
|-------|-----------|-----------|------|---|----|-------------|-------------|-------------|-------------|--------------|--------------|-------------------|
| chr17 | 7553760   | 7554513   | 754  | * | 10 | 3.78806E-11 | 0.017671904 | 0.018623997 | 0.018772899 | 0.052961376  | 0.004445953  | ATP1B2            |
| chr17 | 38229424  | 38229533  | 110  | * | 2  | 9.72274E-08 | 0.001711429 | 0.018652637 | 0.003271714 | 0.106530156  | 0.101104065  | THRA              |
| chr1  | 65432346  | 65432742  | 397  | * | 9  | 1.97588E-12 | 0.025360724 | 0.018657307 | 0.004504049 | 0.033310211  | 0.000394004  |                   |
| chr11 | 118481025 | 118481577 | 553  | * | 3  | 2.93752E-09 | 0.002481402 | 0.018658917 | 0.004370052 | 0.036272574  | 0.027478913  | PHLDB1            |
| chr11 | 8703871   | 8704374   | 504  | * | 9  | 3.48615E-09 | 0.162336137 | 0.01869856  | 0.082172246 | 0.036035583  | 0.005802388  | RPL27A            |
| chr6  | 111927123 | 111927484 | 362  | * | 4  | 6.09994E-10 | 0.004666851 | 0.018714338 | 0.004325371 | -0.055986569 | -0.030752941 | TRAF3IP2          |
| chr1  | 165414189 | 165414379 | 191  | * | 3  | 1.0653E-08  | 0.001298267 | 0.018718423 | 0.002408763 | 0.03309455   | 0.027250666  | RXRG              |
| chr9  | 96720819  | 96721102  | 284  | * | 2  | 1.07864E-08 | 0.001800154 | 0.018737213 | 0.003414234 | -0.050866913 | -0.050229605 | RP11-231K24.2     |
| chr11 | 63655748  | 63656342  | 595  | * | 8  | 1.00317E-14 | 0.045332353 | 0.018737748 | 0.001406921 | -0.14958791  | -0.055232429 | MARK2             |
| chr12 | 2026496   | 2027076   | 581  | * | 4  | 3.76123E-12 | 0.000102753 | 0.018740378 | 0.000413318 | -0.106268953 | -0.040928779 | CACNA2D4          |
| chr19 | 7767229   | 7767584   | 356  | * | 3  | 2.84111E-08 | 0.598779747 | 0.018746467 | 0.107308079 | -0.124318142 | -0.041772848 |                   |
| chr17 | 36715074  | 36715953  | 880  | * | 4  | 1.76899E-10 | 2.26244E-05 | 0.018764456 | 0.000133087 | -0.114917296 | -0.072536567 | SRCIN1            |
| chr8  | 70982867  | 70983348  | 482  | * | 3  | 5.05046E-08 | 0.308875851 | 0.018806925 | 0.086718378 | 0.048211247  | 0.016220869  | PRDM14            |
| chr16 | 57297286  | 57297444  | 159  | * | 3  | 2.99867E-09 | 0.000287192 | 0.018833983 | 0.000890562 | 0.160562203  | 0.109152     | PLLP              |
| chr22 | 38071001  | 38072101  | 1101 | * | 14 | 8.31371E-17 | 0.002669584 | 0.018885175 | 0.001015347 | 0.07260364   | 0.01657295   | LGALS1            |
| chr1  | 93297424  | 93298275  | 852  | * | 8  | 2.37092E-10 | 0.01858153  | 0.018896403 | 0.010093281 | 0.028552607  | -0.000484718 | RPL5              |
| chr1  | 21588448  | 21589450  | 1003 | * | 4  | 2.22456E-09 | 0.000123363 | 0.018917225 | 0.000471502 | 0.149861903  | 0.028064712  | ECE1              |
| chr14 | 105713608 | 105716436 | 2829 | * | 25 | 9.55214E-14 | 0.032230001 | 0.018931118 | 0.004145635 | 0.150701228  | 0.021070712  | BTBD6, BRF1       |
| chr10 | 135149648 | 135150139 | 492  | * | 3  | 3.36217E-10 | 0.004535593 | 0.018964696 | 0.006841051 | 0.092069478  | 0.031096128  | ZNF511, CALY      |
| chr5  | 56112222  | 56112786  | 565  | * | 3  | 7.33448E-08 | 0.014650928 | 0.018967839 | 0.010563383 | -0.044011466 | -0.003646694 | MAP3K1            |
| chr2  | 98280029  | 98280810  | 782  | * | 10 | 7.88548E-12 | 0.025710863 | 0.018977426 | 0.015813684 | -0.037953224 | -0.007855268 | LINC01125, ACTR1B |
| chr12 | 3601306   | 3602546   | 1241 | * | 10 | 2.08626E-10 | 0.049398042 | 0.018989386 | 0.02301902  | 0.054350899  | 0.013793783  | PRMT8             |
| chr5  | 133406542 | 133407209 | 668  | * | 4  | 3.65831E-09 | 0.00218427  | 0.01900322  | 0.002329825 | 0.09088139   | 0.041204581  |                   |
| chr1  | 156094519 | 156094952 | 434  | * | 4  | 1.29836E-08 | 0.00271426  | 0.019010749 | 0.004393748 | 0.149646876  | 0.097909766  | LMNA              |
| chr7  | 1126903   | 1127767   | 865  | * | 6  | 1.96014E-11 | 0.006147305 | 0.01902093  | 0.00489263  | -0.117063514 | 0.019949857  | GPER1, C7orf50    |
| chr8  | 124428770 | 124429792 | 1023 | * | 8  | 8.72355E-11 | 0.172208937 | 0.019047575 | 0.105730226 | -0.066831309 | -0.024501205 | WDYHV1            |
| chr7  | 6199980   | 6200140   | 161  | * | 3  | 4.84042E-08 | 0.002292852 | 0.019088154 | 0.004637261 | 0.099272037  | 0.061914259  | USP42             |
| chr2  | 179315623 | 179316706 | 1084 | * | 16 | 7.85584E-13 | 0.082584541 | 0.01912899  | 0.047376203 | -0.047961244 | -0.007186305 | DFNB59, PRKRA     |
| chr2  | 201728833 | 201730276 | 1444 | * | 17 | 3.79322E-11 | 0.592997124 | 0.019149773 | 0.077530366 | 0.105507286  | 0.009731284  | CLK1              |

|       |           |           |      |   |    |             |             |             |             |              |              |                     |
|-------|-----------|-----------|------|---|----|-------------|-------------|-------------|-------------|--------------|--------------|---------------------|
| chr3  | 58222756  | 58223527  | 772  | * | 9  | 1.31383E-09 | 0.063735367 | 0.019150046 | 0.021478888 | -0.061214965 | -0.020607827 | ABHD6               |
| chr3  | 173113376 | 173113519 | 144  | * | 3  | 5.33938E-08 | 0.002023012 | 0.019160548 | 0.00408051  | -0.059907709 | -0.006242952 |                     |
| chr7  | 26415606  | 26416987  | 1382 | * | 12 | 5.8182E-14  | 0.003666176 | 0.019164184 | 0.000445924 | -0.066240253 | -0.005749338 | AC004540.4          |
| chr1  | 249132477 | 249132838 | 362  | * | 4  | 2.01329E-08 | 0.002348797 | 0.019174084 | 0.002748563 | 0.059260712  | 0.023056338  | ZNF672              |
| chr19 | 3698157   | 3698223   | 67   | * | 2  | 3.27685E-08 | 0.001738178 | 0.019212596 | 0.003336865 | 0.150432202  | 0.110644026  | PIP5K1C             |
| chr17 | 8026413   | 8026777   | 365  | * | 2  | 3.12146E-10 | 0.312384266 | 0.019218401 | 0.052442164 | 0.040521288  | 0.018525135  | HES7                |
| chr2  | 240152334 | 240152476 | 143  | * | 2  | 4.81106E-08 | 0.001712534 | 0.019222486 | 0.003296543 | -0.05268785  | -0.050786068 | HDAC4               |
| chr11 | 20409647  | 20409780  | 134  | * | 2  | 1.45413E-07 | 0.008527118 | 0.019234913 | 0.011206984 | 0.033264108  | 0.023893672  | PRMT3               |
| chr1  | 235107109 | 235107121 | 13   | * | 2  | 9.38384E-08 | 0.001867628 | 0.019251461 | 0.003541796 | 0.125569309  | 0.118701049  |                     |
| chr9  | 95527179  | 95527975  | 797  | * | 5  | 4.83597E-09 | 0.002506542 | 0.019253652 | 0.003135658 | -0.05100331  | -0.015027277 |                     |
| chr5  | 53605192  | 53606129  | 938  | * | 3  | 2.19362E-09 | 0.172499648 | 0.019277946 | 0.048198489 | 0.186965093  | 0.054842222  | ARL15               |
| chr17 | 79819298  | 79819480  | 183  | * | 3  | 1.4746E-08  | 0.004820677 | 0.019306185 | 0.005229115 | 0.036394399  | 0.017272439  |                     |
| chr11 | 47198535  | 47199922  | 1388 | * | 15 | 2.74793E-11 | 0.067507843 | 0.019311678 | 0.016462479 | 0.132219523  | -0.009021879 | ARFGAP2, PACSIN3    |
| chr8  | 9413989   | 9414115   | 127  | * | 3  | 2.23079E-08 | 0.012090093 | 0.019316325 | 0.013459392 | 0.025819983  | 0.016681145  | TNKS, RP11-375N15.2 |
| chr19 | 6424783   | 6425207   | 425  | * | 4  | 1.34776E-08 | 0.043506144 | 0.01936275  | 0.008453531 | -0.044503185 | -0.02047591  | KHSRP               |
| chr1  | 184006496 | 184007117 | 622  | * | 6  | 1.23908E-13 | 0.001509674 | 0.01936742  | 0.000486618 | -0.161866607 | -0.064462685 | COLGALT2            |
| chr7  | 27778939  | 27780234  | 1296 | * | 19 | 1.21522E-13 | 0.103229019 | 0.019372595 | 0.037612115 | -0.050138647 | -0.010865813 | TAX1BP1, AC004549.6 |
| chr1  | 67519155  | 67519814  | 660  | * | 6  | 2.69271E-11 | 0.034420518 | 0.019375592 | 0.012261065 | -0.101245403 | -0.010286628 | SLC35D1             |
| chr1  | 86861147  | 86862273  | 1127 | * | 14 | 1.94873E-12 | 0.091294925 | 0.019381441 | 0.028965208 | 0.050705453  | 0.006005511  | ODF2L               |
| chr15 | 101458112 | 101458783 | 672  | * | 5  | 4.64976E-12 | 0.016137165 | 0.019385092 | 0.004004441 | -0.196604598 | -0.073872312 | RP11-66B24.4        |
| chr19 | 8509809   | 8510764   | 956  | * | 5  | 2.24601E-11 | 0.000741661 | 0.019394442 | 0.001934527 | -0.030359172 | -0.00088973  | HNRNPM              |
| chr12 | 48111841  | 48112358  | 518  | * | 4  | 4.74138E-10 | 0.000588732 | 0.019395447 | 0.00131625  | 0.158815435  | 0.083814559  | RP1-197B17.3, ENDOU |
| chr15 | 75743136  | 75744976  | 1841 | * | 14 | 1.26512E-16 | 0.002302741 | 0.019397035 | 0.000354457 | -0.053755183 | -0.011316152 | SIN3A               |
| chr6  | 146863357 | 146864390 | 1034 | * | 12 | 1.26453E-14 | 0.046087857 | 0.01940199  | 0.017337826 | -0.102839743 | -0.009495975 |                     |
| chr16 | 88769443  | 88769970  | 528  | * | 5  | 2.60813E-10 | 0.002862124 | 0.019402362 | 0.004912267 | 0.118013567  | 0.049465628  | RNF166              |
| chr1  | 17409889  | 17409984  | 96   | * | 4  | 1.1885E-10  | 0.000138411 | 0.019404713 | 0.000511192 | -0.136127038 | -0.084918864 | PADI2               |
| chr16 | 2478353   | 2478800   | 448  | * | 4  | 9.02218E-10 | 0.014889872 | 0.019407976 | 0.005582982 | 0.063068108  | 0.027706484  |                     |
| chr3  | 158288695 | 158289160 | 466  | * | 12 | 9.30897E-11 | 0.033019961 | 0.019409354 | 0.024069774 | -0.057464286 | -0.005103899 | MLF1, RP11-538P18.2 |
| chr20 | 24930041  | 24930541  | 501  | * | 3  | 1.93388E-08 | 0.001479422 | 0.019421575 | 0.003219034 | -0.141301136 | -0.0732846   | CST7                |

|       |           |           |      |   |    |             |             |             |             |              |              |                       |
|-------|-----------|-----------|------|---|----|-------------|-------------|-------------|-------------|--------------|--------------|-----------------------|
| chr1  | 109968772 | 109969933 | 1162 | * | 17 | 1.31151E-11 | 0.584210493 | 0.019423391 | 0.092309418 | -0.045181478 | -0.014175914 | PSMA5                 |
| chr2  | 51260176  | 51260399  | 224  | * | 2  | 4.1589E-08  | 0.077366523 | 0.019448787 | 0.037580145 | 0.141446551  | 0.087825722  | AC007682.1            |
| chr8  | 42129353  | 42129644  | 292  | * | 2  | 4.50675E-09 | 0.001748782 | 0.019464337 | 0.003363842 | -0.118667633 | -0.077730645 | IKKB                  |
| chr11 | 66636291  | 66636369  | 79   | * | 3  | 9.89646E-08 | 0.001970042 | 0.019491735 | 0.003234343 | -0.15683502  | -0.033530839 | PC                    |
| chr17 | 17684010  | 17684042  | 33   | * | 2  | 1.19736E-07 | 0.001980244 | 0.019493408 | 0.003727032 | 0.100582236  | 0.099698429  | RAI1                  |
| chr2  | 98261952  | 98262923  | 972  | * | 14 | 9.69534E-16 | 0.012137926 | 0.019499811 | 0.002777482 | -0.067961947 | -0.021211407 | COX5B                 |
| chr10 | 23216182  | 23216299  | 118  | * | 2  | 8.50428E-09 | 0.001836492 | 0.019512138 | 0.003504385 | 0.162891453  | 0.153812283  |                       |
| chr17 | 32690127  | 32690732  | 606  | * | 7  | 3.89337E-13 | 0.000116012 | 0.019514106 | 0.000419393 | -0.131321782 | -0.03179496  | CCL1                  |
| chr13 | 79979614  | 79980098  | 485  | * | 6  | 5.0712E-09  | 0.022765933 | 0.019529008 | 0.021630502 | 0.021404357  | 0.004500793  | RBM26                 |
| chr20 | 17206946  | 17207562  | 617  | * | 5  | 5.35792E-09 | 0.006791744 | 0.019547892 | 0.004367303 | 0.040085652  | 0.021583248  | PCSK2                 |
| chr17 | 74498083  | 74498760  | 678  | * | 4  | 1.99803E-11 | 0.00045068  | 0.019573953 | 0.00085798  | -0.105292998 | -0.08536734  |                       |
| chr1  | 17745990  | 17746597  | 608  | * | 7  | 1.56006E-12 | 0.000173209 | 0.019579569 | 0.000575333 | 0.209276168  | 0.066931371  | RCC2                  |
| chr6  | 3848218   | 3850106   | 1889 | * | 33 | 4.92393E-29 | 0.1262448   | 0.019601261 | 0.000837383 | -0.234935796 | -0.053609093 | RP11-420L9.4, FAM50B  |
| chr18 | 25757202  | 25757555  | 354  | * | 4  | 5.90387E-09 | 0.019183121 | 0.019622296 | 0.007094167 | 0.032746578  | 0.016476358  | CDH2                  |
| chr1  | 110881368 | 110882527 | 1160 | * | 11 | 4.12711E-11 | 0.03960624  | 0.019634865 | 0.02086146  | -0.030257498 | 0.000141691  | RBM15, RP5-1074L1.1   |
| chr2  | 8422236   | 8422332   | 97   | * | 3  | 1.14172E-07 | 0.002085772 | 0.019639099 | 0.003910203 | 0.115893214  | 0.069848524  | LINC00299             |
| chr17 | 42289769  | 42290419  | 651  | * | 5  | 4.84856E-08 | 0.021833253 | 0.019663723 | 0.014678066 | 0.095814122  | 0.050415242  | CTB-175E5.7, UBTF     |
| chr2  | 106682209 | 106682640 | 432  | * | 3  | 2.56502E-08 | 0.011516816 | 0.019665185 | 0.014773656 | -0.063991509 | 0.015937154  | C2orf40               |
| chr8  | 125550836 | 125551626 | 791  | * | 15 | 4.11383E-10 | 0.342897422 | 0.019677005 | 0.088988432 | 0.023412825  | 0.003627892  | NDUFB9, TATDN1        |
| chr9  | 6681415   | 6681608   | 194  | * | 3  | 6.65809E-10 | 0.003670079 | 0.019679315 | 0.004535132 | 0.035313413  | 0.01458098   |                       |
| chr4  | 89512872  | 89513664  | 793  | * | 9  | 8.32859E-10 | 0.761165507 | 0.019684663 | 0.123643041 | -0.05696799  | -0.003919762 | HERC3                 |
| chr2  | 208489307 | 208491029 | 1723 | * | 16 | 8.41832E-13 | 0.01654542  | 0.019720292 | 0.00171162  | -0.066536033 | -0.000591885 | METTL21A              |
| chr2  | 196520930 | 196522552 | 1623 | * | 19 | 5.15387E-17 | 0.08397993  | 0.019728054 | 0.003900085 | -0.296016203 | -0.037701653 | SLC39A10              |
| chr7  | 19157650  | 19158041  | 392  | * | 9  | 3.52868E-09 | 0.06408848  | 0.019734433 | 0.04596064  | 0.050650588  | 0.018861314  |                       |
| chr10 | 6185502   | 6186794   | 1293 | * | 11 | 6.13911E-18 | 0.018276358 | 0.019740963 | 0.00113817  | -0.168565675 | -0.031024201 |                       |
| chr6  | 10555682  | 10556523  | 842  | * | 9  | 4.30379E-15 | 0.004883024 | 0.019776826 | 0.001072525 | 0.161780487  | 0.070703304  | GCNT2                 |
| chr22 | 46645903  | 46646882  | 980  | * | 8  | 8.93258E-09 | 0.058073011 | 0.019779569 | 0.030507462 | -0.039697235 | -0.002859018 | CDPF1                 |
| chr16 | 596670    | 597434    | 765  | * | 5  | 5.02051E-12 | 0.000311386 | 0.019786371 | 0.001086225 | -0.145172546 | -0.105343177 | CAPN15, LA16c-366D1.3 |
| chr3  | 49760915  | 49761251  | 337  | * | 5  | 9.14415E-10 | 0.009306289 | 0.019786923 | 0.010315428 | 0.015039921  | 0.004216198  | AMIGO3, GMPPB         |

|       |           |           |      |   |    |             |             |             |             |              |              |                       |
|-------|-----------|-----------|------|---|----|-------------|-------------|-------------|-------------|--------------|--------------|-----------------------|
| chr6  | 10505886  | 10505955  | 70   | * | 3  | 1.61893E-07 | 0.00136604  | 0.019821997 | 0.003055689 | -0.214074856 | -0.152369656 | GCNT2                 |
| chr21 | 38377938  | 38379036  | 1099 | * | 8  | 1.30208E-11 | 0.007731965 | 0.019822565 | 0.003647907 | 0.076334694  | 0.030398395  | RIPPLY3               |
| chr5  | 130500762 | 130501079 | 318  | * | 4  | 1.02251E-07 | 0.008646997 | 0.019829543 | 0.011040939 | -0.042765657 | -0.00200904  | HINT1                 |
| chr7  | 2769681   | 2769865   | 185  | * | 2  | 7.23408E-08 | 0.002163523 | 0.019859024 | 0.004024345 | -0.107722602 | -0.102906493 | AMZ1, GNA12           |
| chr17 | 66596999  | 66597007  | 9    | * | 2  | 3.21057E-08 | 0.001879917 | 0.019886132 | 0.003588505 | 0.037384526  | 0.034172415  | RP11-118B18.1, FAM20A |
| chr18 | 47087723  | 47088780  | 1058 | * | 11 | 7.31418E-14 | 0.000903574 | 0.019891103 | 0.001280745 | 0.035551884  | 0.01619461   | LIPG                  |
| chr16 | 2256121   | 2256716   | 596  | * | 5  | 5.90201E-12 | 0.016501206 | 0.019909575 | 0.005855216 | -0.10113303  | -0.036935732 | MLST8                 |
| chr19 | 36004994  | 36005395  | 402  | * | 3  | 2.37558E-09 | 0.002040166 | 0.019937899 | 0.004200888 | 0.076892252  | 0.0738583    |                       |
| chr11 | 124647244 | 124647347 | 104  | * | 3  | 6.54987E-08 | 0.003008148 | 0.019976826 | 0.003933787 | 0.105593291  | 0.064517896  | MSANTD2               |
| chr6  | 135502390 | 135502875 | 486  | * | 4  | 1.01873E-10 | 0.005172922 | 0.019997547 | 0.008181036 | -0.047168673 | -0.015279711 | MYB                   |
| chr17 | 1986479   | 1987136   | 658  | * | 4  | 1.41138E-10 | 0.00054114  | 0.020007092 | 0.001376752 | -0.185707542 | -0.086166871 | SMG6                  |
| chr13 | 114261869 | 114261986 | 118  | * | 3  | 1.85458E-09 | 0.000215027 | 0.020015505 | 0.000730296 | -0.114379045 | -0.104789652 | TFDP1                 |
| chr1  | 11119628  | 11120633  | 1006 | * | 8  | 2.35706E-09 | 0.010488404 | 0.020019727 | 0.004489317 | 0.025715492  | 0.003289058  | SRM                   |
| chr2  | 27545550  | 27546456  | 907  | * | 13 | 2.00791E-12 | 0.030644141 | 0.020025703 | 0.007847782 | -0.034336051 | -0.0036128   | MPV17                 |
| chr11 | 1325718   | 1326704   | 987  | * | 6  | 1.6489E-13  | 0.000160708 | 0.020030378 | 0.000186065 | 0.165138842  | 0.070862689  | TOLLIP                |
| chr17 | 60758710  | 60758801  | 92   | * | 3  | 4.71168E-08 | 0.001337875 | 0.020063592 | 0.003132452 | 0.117461358  | 0.07087322   | MRC2                  |
| chr1  | 152083276 | 152083292 | 17   | * | 2  | 7.92644E-08 | 0.001900736 | 0.020075475 | 0.003629298 | 0.05465529   | 0.04631859   | TCHH                  |
| chr17 | 78800767  | 78800806  | 40   | * | 3  | 3.58189E-10 | 0.00024451  | 0.020078626 | 0.00080818  | -0.124208304 | -0.112743266 | RPTOR                 |
| chr2  | 100824336 | 100824930 | 595  | * | 5  | 6.2614E-10  | 0.000877442 | 0.020103789 | 0.001220743 | 0.158269205  | 0.074470293  | LINC01104             |
| chr2  | 163199311 | 163200671 | 1361 | * | 13 | 4.66798E-17 | 0.000398289 | 0.02015046  | 0.000160045 | -0.278375855 | -0.06842974  | GCA                   |
| chr15 | 71407484  | 71408080  | 597  | * | 5  | 8.15909E-10 | 0.098391499 | 0.020217474 | 0.03313145  | 0.052865451  | 0.01692655   | THSD4, CT62           |
| chr5  | 159933856 | 159934412 | 557  | * | 3  | 2.92572E-09 | 0.000235979 | 0.020224116 | 0.000786367 | 0.155047948  | 0.10554404   |                       |
| chr2  | 223176167 | 223177008 | 842  | * | 8  | 2.39908E-08 | 0.331114371 | 0.020268206 | 0.083438821 | 0.052994695  | 0.017544349  |                       |
| chr14 | 102430437 | 102430709 | 273  | * | 3  | 2.07113E-08 | 0.000407827 | 0.020280743 | 0.001214874 | 0.085147744  | 0.043637724  |                       |
| chr22 | 31891748  | 31892562  | 815  | * | 15 | 4.48781E-12 | 0.077910712 | 0.020288309 | 0.03343144  | 0.081296416  | 0.001475768  | DRG1, SFI1, EIF4ENIF1 |
| chr20 | 61810348  | 61810902  | 555  | * | 5  | 6.73703E-10 | 0.038382273 | 0.020310647 | 0.01294913  | -0.070988094 | -0.002793041 | RP5-963E22.4          |
| chr22 | 42765138  | 42765436  | 299  | * | 5  | 3.73733E-09 | 0.015740849 | 0.020353739 | 0.011330916 | 0.031309038  | 0.003473015  | Z83851.1              |
| chr2  | 24232161  | 24233341  | 1181 | * | 12 | 3.92426E-11 | 0.026058108 | 0.020374614 | 0.024262805 | 0.28415789   | 0.011594673  | MFSD2B                |
| chr19 | 18632488  | 18633523  | 1036 | * | 12 | 4.64376E-12 | 0.002968116 | 0.020394324 | 0.004557621 | -0.056168758 | -0.01101016  | ELL                   |

|       |           |           |      |   |    |             |             |             |             |              |              |                                      |
|-------|-----------|-----------|------|---|----|-------------|-------------|-------------|-------------|--------------|--------------|--------------------------------------|
| chr3  | 5229596   | 5230189   | 594  | * | 7  | 3.69614E-09 | 0.47941968  | 0.020416796 | 0.090444656 | 0.031578357  | 0.005507297  | EDEM1, AC026202.1                    |
| chr5  | 68530331  | 68531229  | 899  | * | 16 | 1.15138E-14 | 0.009907667 | 0.020423631 | 0.006459974 | -0.054913523 | -0.014721741 | CDK7                                 |
| chr15 | 74902534  | 74903214  | 681  | * | 3  | 6.82496E-09 | 0.000242027 | 0.020452719 | 0.000807099 | 0.10292435   | 0.089432006  | CLK3                                 |
| chr1  | 47081524  | 47083518  | 1995 | * | 14 | 1.31119E-12 | 0.000228872 | 0.020463576 | 0.000148022 | -0.164891197 | -0.00980837  | MKNK1, MOB3C                         |
| chr12 | 70759866  | 70760024  | 159  | * | 5  | 2.46881E-08 | 0.217747526 | 0.0204877   | 0.024994593 | -0.067367329 | -0.007975022 |                                      |
| chr1  | 6480167   | 6480594   | 428  | * | 3  | 2.95361E-09 | 0.00238757  | 0.020493761 | 0.004911903 | 0.072267262  | 0.044277166  | HES2                                 |
| chr16 | 1545088   | 1545405   | 318  | * | 3  | 6.20896E-08 | 0.011484931 | 0.020506908 | 0.006485812 | 0.106331409  | 0.07250336   | TELO2                                |
| chr12 | 27934708  | 27934973  | 266  | * | 3  | 5.04142E-08 | 0.003513292 | 0.020517446 | 0.0042572   | 0.120744322  | 0.076681629  | KLHL42                               |
| chr3  | 187009575 | 187009702 | 128  | * | 2  | 1.11571E-07 | 0.004937381 | 0.020523482 | 0.007745999 | 0.134574533  | 0.107888489  | MASP1                                |
| chr6  | 150183516 | 150184138 | 623  | * | 4  | 4.63041E-09 | 0.009770516 | 0.020591157 | 0.007144588 | 0.151527066  | 0.054482545  | RP11-244K5.8, LRP11                  |
| chr17 | 7218050   | 7219319   | 1270 | * | 12 | 1.99155E-12 | 0.024622865 | 0.020645887 | 0.012060546 | -0.032904292 | 0.003589087  | GPS2, RP11-542C16.2, NEURL4          |
| chr3  | 119812813 | 119814693 | 1881 | * | 13 | 2.15155E-14 | 4.85914E-05 | 0.020649761 | 0.000160982 | 0.026892406  | 0.009008667  | RP11-18H7.1, GSK3B                   |
| chr9  | 139636616 | 139637895 | 1280 | * | 6  | 1.04014E-10 | 0.000428086 | 0.020662465 | 0.000666545 | 0.152088867  | 0.048031321  | LCN10, LCN6                          |
| chr11 | 57093322  | 57093618  | 297  | * | 3  | 2.20739E-08 | 0.050769465 | 0.020674686 | 0.008862182 | 0.158797734  | 0.092339944  | RP11-872D17.4, SSRP1                 |
| chr10 | 1704858   | 1705085   | 228  | * | 3  | 2.38808E-08 | 0.001391446 | 0.020682998 | 0.002803723 | 0.103802584  | 0.073893241  | ADARB2                               |
| chr6  | 117803953 | 117804230 | 278  | * | 2  | 5.83076E-08 | 0.002113879 | 0.020686371 | 0.003988635 | -0.075787988 | -0.018607429 | DCBLD1, GOPC                         |
| chr14 | 24711390  | 24713132  | 1743 | * | 15 | 4.04616E-14 | 0.000133664 | 0.020693438 | 0.00018871  | 0.124806995  | 0.007863407  | TINF2                                |
| chr16 | 30771976  | 30773936  | 1961 | * | 21 | 6.7505E-24  | 0.009002152 | 0.020698257 | 0.000185699 | -0.101578653 | -0.000119457 | PHKG2, RNF40, C16orf93               |
| chr4  | 184826953 | 184827754 | 802  | * | 4  | 8.02024E-09 | 0.002404039 | 0.020717697 | 0.0037812   | -0.046308057 | 0.000204511  | STOX2                                |
| chr5  | 180673096 | 180674133 | 1038 | * | 11 | 1.51112E-10 | 0.024353275 | 0.020724119 | 0.011612551 | -0.072209894 | 0.005508439  | CTC-338M12.4, GNB2L1                 |
| chr4  | 39448464  | 39449130  | 667  | * | 5  | 4.49334E-10 | 0.001920771 | 0.020732418 | 0.003586461 | 0.136168387  | 0.082536726  | KLB                                  |
| chr2  | 24582653  | 24582688  | 36   | * | 2  | 1.03156E-07 | 0.003045079 | 0.020746887 | 0.005355198 | -0.040409182 | -0.009783452 | ITSN2                                |
| chr1  | 153918286 | 153918709 | 424  | * | 2  | 5.28109E-08 | 0.003516701 | 0.020774515 | 0.005998734 | 0.022802167  | 0.003479532  | DENND4B                              |
| chr2  | 68479620  | 68480222  | 603  | * | 4  | 6.56693E-09 | 0.002215135 | 0.020785961 | 0.003324008 | 0.028420506  | 0.012825884  | RP11-474G23.3, RP11-474G23.1, PPP3R1 |
| chr19 | 50143224  | 50143951  | 728  | * | 11 | 4.88578E-19 | 1.19407E-05 | 0.020797138 | 2.52534E-05 | -0.058636145 | -0.019952574 | RRAS                                 |
| chr5  | 102201825 | 102202139 | 315  | * | 4  | 2.4916E-08  | 0.435811301 | 0.020801844 | 0.068113971 | -0.044332051 | -0.015464388 | PAM                                  |
| chr20 | 36155925  | 36157405  | 1481 | * | 44 | 1.58959E-19 | 0.467129716 | 0.020840559 | 0.093769713 | -0.047687605 | 0.000537018  | BLCAP                                |
| chr1  | 45792006  | 45792733  | 728  | * | 10 | 6.49822E-09 | 0.173751167 | 0.020849354 | 0.028076743 | 0.08790309   | 0.018494197  | HPDL                                 |
| chr16 | 75498408  | 75498625  | 218  | * | 6  | 8.50904E-09 | 0.007267676 | 0.020872101 | 0.010346387 | 0.02091584   | 0.000349093  | RP11-77K12.1, TMEM170A               |

|       |           |           |      |   |    |             |             |             |             |              |              |                          |
|-------|-----------|-----------|------|---|----|-------------|-------------|-------------|-------------|--------------|--------------|--------------------------|
| chr1  | 167189623 | 167190631 | 1009 | * | 11 | 1.05353E-10 | 0.20877054  | 0.020892637 | 0.026597739 | -0.076617798 | -0.014214694 | POU2F1, RP11-277B15.3    |
| chr1  | 181074635 | 181074790 | 156  | * | 3  | 2.27695E-08 | 0.023788997 | 0.020898618 | 0.00868201  | 0.028944912  | 0.014021431  |                          |
| chr19 | 47128970  | 47129637  | 668  | * | 5  | 1.28326E-10 | 0.000496283 | 0.020900516 | 0.001359314 | 0.167097386  | 0.118146197  |                          |
| chr18 | 12702185  | 12703040  | 856  | * | 15 | 1.17166E-11 | 0.120799407 | 0.020922968 | 0.037040757 | -0.101533481 | -0.007316402 | PSMG2, CEP76             |
| chr11 | 31821298  | 31822341  | 1044 | * | 9  | 7.38677E-10 | 0.000991385 | 0.020931426 | 0.002677567 | 0.112510553  | 0.031747311  | PAX6                     |
| chr21 | 43771120  | 43771664  | 545  | * | 6  | 1.06992E-13 | 0.000142338 | 0.020948961 | 0.000221681 | 0.161817117  | 0.109379796  | TFF2                     |
| chr8  | 70746128  | 70748063  | 1936 | * | 22 | 4.57348E-13 | 0.131099029 | 0.020951649 | 0.016173635 | -0.142916054 | -0.003933465 | RP11-159H10.3, SLC05A1   |
| chr19 | 917326    | 917813    | 488  | * | 5  | 3.43431E-09 | 0.032588253 | 0.02096191  | 0.030040127 | 0.039896992  | 0.010494975  | KISS1R                   |
| chr13 | 25946838  | 25947459  | 622  | * | 4  | 2.28191E-11 | 0.000508715 | 0.02096457  | 0.001255672 | -0.170572366 | -0.025951943 | ATP8A2                   |
| chr1  | 2574031   | 2574885   | 855  | * | 7  | 3.91938E-11 | 0.000989289 | 0.02099936  | 0.001669361 | -0.066934614 | -0.007488454 | TTC34                    |
| chr15 | 85259471  | 85259484  | 14   | * | 3  | 1.83466E-07 | 0.025597834 | 0.021031384 | 0.023534381 | 0.024435161  | 0.014246959  | SEC11A                   |
| chr12 | 14133667  | 14133887  | 221  | * | 3  | 3.36497E-08 | 0.003460635 | 0.021038601 | 0.006531734 | 0.035444157  | 0.025240684  |                          |
| chr2  | 38302487  | 38302674  | 188  | * | 3  | 1.48631E-07 | 0.06542238  | 0.021050152 | 0.043735136 | 0.088962069  | 0.0152624    | CYP1B1                   |
| chr1  | 234795783 | 234796042 | 260  | * | 4  | 1.53435E-07 | 0.008469734 | 0.021106371 | 0.005963655 | 0.148926703  | 0.076092044  | RP4-781K5.4, RP4-781K5.5 |
| chr11 | 117855870 | 117857990 | 2121 | * | 13 | 2.66851E-09 | 0.041119705 | 0.021108572 | 0.004785941 | -0.11366595  | 0.003158206  | IL10RA                   |
| chr5  | 95768418  | 95769305  | 888  | * | 11 | 6.85247E-10 | 0.086547027 | 0.021135114 | 0.069139655 | 0.051683631  | 0.014594368  | CTD-2337A12.1, PCSK1     |
| chr2  | 227834295 | 227834762 | 468  | * | 2  | 3.06259E-08 | 0.079399661 | 0.021170444 | 0.040124581 | 0.095570695  | 0.032284476  | RHBDD1                   |
| chr10 | 14880332  | 14881096  | 765  | * | 7  | 1.258E-11   | 0.004790013 | 0.021189267 | 0.006408497 | -0.065277514 | -0.023387991 | HSPA14, CDNF             |
| chr17 | 7311030   | 7311868   | 839  | * | 6  | 3.13372E-12 | 0.008723903 | 0.021201216 | 0.006583176 | -0.125612074 | -0.047536043 | NLGN2                    |
| chr12 | 111126844 | 111127287 | 444  | * | 7  | 2.54626E-08 | 0.064970363 | 0.021223086 | 0.025859684 | -0.069573793 | -0.023794489 | HVCN1                    |
| chr12 | 7054989   | 7055829   | 841  | * | 11 | 1.76096E-10 | 0.078262553 | 0.021226983 | 0.032986049 | -0.208127094 | -0.033043398 | C12orf57, PTPN6          |
| chr10 | 76968350  | 76970516  | 2167 | * | 20 | 3.68358E-15 | 0.004182759 | 0.021227571 | 0.000402584 | 0.10006609   | 0.009395035  | VDAC2                    |
| chr19 | 49991271  | 49991389  | 119  | * | 2  | 1.19122E-07 | 0.040901082 | 0.021228228 | 0.03000032  | 0.022611887  | 0.006722935  | RPL13A                   |
| chr11 | 20620002  | 20621341  | 1340 | * | 11 | 7.40696E-15 | 0.007079644 | 0.021248235 | 0.002535237 | 0.101971811  | 0.03942091   | SLC6A5                   |
| chr17 | 46692008  | 46692168  | 161  | * | 3  | 1.35998E-07 | 0.004301044 | 0.021293019 | 0.007243131 | 0.029225782  | 0.023391245  | HOXB7, HOXB8             |
| chr16 | 89766660  | 89767958  | 1299 | * | 8  | 1.24546E-16 | 1.7668E-05  | 0.02133723  | 1.96857E-05 | 0.058976558  | 0.003291706  | SPATA2L                  |
| chr5  | 96143578  | 96144364  | 787  | * | 14 | 1.45941E-12 | 0.034619866 | 0.021348262 | 0.017018144 | -0.098805154 | -0.004252083 | ERAP1                    |
| chr3  | 134203672 | 134204409 | 738  | * | 7  | 1.85699E-10 | 0.105094374 | 0.021356688 | 0.018398701 | -0.039322796 | 0.000867578  | ANAPC13                  |
| chr15 | 51988940  | 51989637  | 698  | * | 4  | 3.09227E-10 | 9.20909E-05 | 0.021387261 | 0.000422365 | 0.129513493  | 0.097767489  | SCG3                     |

|       |           |           |      |   |    |             |             |             |             |              |              |                        |
|-------|-----------|-----------|------|---|----|-------------|-------------|-------------|-------------|--------------|--------------|------------------------|
| chr19 | 4455239   | 4455957   | 719  | * | 7  | 4.03928E-11 | 0.001327575 | 0.021394101 | 0.003013144 | 0.227327544  | 0.099440065  | CTB-50L17.9, UBXN6     |
| chr3  | 49506547  | 49508289  | 1743 | * | 10 | 8.37876E-13 | 9.31754E-05 | 0.021415709 | 0.000144203 | 0.132551457  | 0.011542922  | DAG1                   |
| chr6  | 64281439  | 64281996  | 558  | * | 9  | 4.57817E-15 | 0.004328936 | 0.021433454 | 0.000978211 | -0.144874279 | -0.057138346 | PTP4A1, RP5-1148A21.3  |
| chr8  | 144363043 | 144363930 | 888  | * | 7  | 4.8733E-12  | 0.011184686 | 0.021436682 | 0.003913709 | -0.146727317 | -0.035262908 | RP13-582O9.5           |
| chr13 | 99130655  | 99130967  | 313  | * | 3  | 5.50146E-08 | 0.000890828 | 0.021437228 | 0.00224175  | 0.085901335  | 0.066072366  | STK24                  |
| chr3  | 3168755   | 3169230   | 476  | * | 3  | 4.47228E-09 | 0.000450762 | 0.021437784 | 0.001347447 | 0.053734706  | 0.035588185  | TRNT1                  |
| chr12 | 49627010  | 49627934  | 925  | * | 4  | 5.68629E-12 | 5.18979E-05 | 0.021464135 | 0.000272184 | -0.105784771 | -0.074617179 | TUBA1C, RP11-977B10.2  |
| chr6  | 83902926  | 83904067  | 1142 | * | 21 | 5.37892E-12 | 0.079413294 | 0.021472372 | 0.076327419 | -0.054380549 | -0.008385516 | RWDD2A, PGM3           |
| chr4  | 71858619  | 71859713  | 1095 | * | 15 | 3.23012E-12 | 0.010327633 | 0.021480804 | 0.01053761  | 0.093142521  | 0.014735078  | MOB1B, DCK             |
| chr9  | 139743122 | 139743802 | 681  | * | 9  | 2.80356E-12 | 0.00182205  | 0.02148533  | 0.002896715 | -0.046396562 | -0.003191701 | PHPT1                  |
| chr2  | 173940430 | 173940639 | 210  | * | 5  | 5.131E-08   | 0.139635037 | 0.021487149 | 0.05499246  | 0.022897883  | 0.003182887  | MLTK                   |
| chr4  | 56814925  | 56815073  | 149  | * | 6  | 1.07847E-08 | 0.02434041  | 0.021490254 | 0.01678594  | 0.016872912  | 0.006894888  | CEP135                 |
| chr11 | 65149587  | 65151509  | 1923 | * | 15 | 9.73735E-18 | 0.037508921 | 0.021502407 | 0.003421414 | 0.106924216  | 0.005866623  | SLC25A45               |
| chr17 | 13971618  | 13972896  | 1279 | * | 10 | 2.47682E-12 | 0.048192614 | 0.021508697 | 0.029591279 | 0.140530982  | 0.026051804  | COX10, COX10-AS1       |
| chr21 | 34638009  | 34638188  | 180  | * | 3  | 9.27616E-09 | 0.003776008 | 0.021517764 | 0.007021024 | -0.108194336 | -0.038416602 | AP000295.9, IL10RB-AS1 |
| chr8  | 64081095  | 64081408  | 314  | * | 8  | 6.31971E-08 | 0.611308283 | 0.021526416 | 0.074534782 | 0.069517419  | 0.009576608  | YTHDF3                 |
| chr11 | 45826170  | 45826537  | 368  | * | 4  | 1.73341E-08 | 0.005286709 | 0.021526809 | 0.00915729  | 0.027469605  | 0.012244589  | SLC35C1                |
| chr7  | 87849017  | 87849336  | 320  | * | 5  | 2.3398E-08  | 0.133042424 | 0.021528763 | 0.052095271 | 0.018196781  | 0.007865077  | AC003991.3, SRI        |
| chr14 | 60386705  | 60387117  | 413  | * | 4  | 6.72501E-10 | 0.014122931 | 0.021573695 | 0.003788519 | -0.152011727 | -0.06284686  | LRRC9, RP11-62H20.1    |
| chr2  | 157190747 | 157190958 | 212  | * | 2  | 3.60173E-08 | 0.036870765 | 0.021619662 | 0.028765359 | 0.021230854  | 0.014938545  | NR4A2                  |
| chr5  | 42992128  | 42992998  | 871  | * | 4  | 2.4811E-10  | 0.000669954 | 0.021631486 | 0.001522795 | 0.041361085  | 0.028108662  |                        |
| chr2  | 96873994  | 96874823  | 830  | * | 14 | 2.60902E-09 | 0.515526433 | 0.021669793 | 0.131493104 | 0.019961893  | 0.002626883  | STARD7-AS1, STARD7     |
| chr13 | 20702922  | 20702970  | 49   | * | 2  | 1.53578E-07 | 0.013718838 | 0.021683861 | 0.016182176 | 0.011876166  | 0.008821283  |                        |
| chr16 | 49732224  | 49732623  | 400  | * | 4  | 2.26473E-11 | 4.88111E-05 | 0.02174199  | 0.000260488 | 0.181212724  | 0.153410995  | ZNF423                 |
| chr6  | 163149320 | 163149453 | 134  | * | 2  | 1.76558E-07 | 0.021279704 | 0.021747586 | 0.021278983 | -0.129379819 | -0.10394104  | PACRG                  |
| chr11 | 1953661   | 1953846   | 186  | * | 2  | 4.36545E-08 | 0.002297003 | 0.021764017 | 0.004322044 | 0.178345882  | 0.13665217   | TNNT3                  |
| chr19 | 44506373  | 44507379  | 1007 | * | 14 | 4.5939E-14  | 0.007197229 | 0.021798215 | 0.002063874 | 0.093847838  | 0.000468048  | ZNF230, RP11-15A1.7    |
| chr3  | 136580640 | 136581035 | 396  | * | 8  | 7.64403E-11 | 0.02444831  | 0.021847385 | 0.008614315 | 0.023810304  | 0.010335832  | RP11-85F14.5           |
| chr6  | 26757644  | 26758395  | 752  | * | 5  | 3.06737E-08 | 0.002146112 | 0.021849144 | 0.003699314 | 0.08433808   | 0.050322819  |                        |



|       |           |           |      |   |    |             |             |             |             |              |              |                                     |
|-------|-----------|-----------|------|---|----|-------------|-------------|-------------|-------------|--------------|--------------|-------------------------------------|
| chr1  | 14075362  | 14076293  | 932  | * | 13 | 3.32391E-15 | 0.007063225 | 0.021863761 | 0.001364572 | -0.029399603 | -0.002125721 | PRDM2                               |
| chr2  | 45231782  | 45232117  | 336  | * | 3  | 1.873E-08   | 0.004829284 | 0.021874105 | 0.00670041  | 0.03485589   | 0.022779503  |                                     |
| chr19 | 48112407  | 48112503  | 97   | * | 3  | 1.25819E-07 | 0.003841827 | 0.021875303 | 0.00649065  | 0.020715675  | 0.015131545  | CTD-2571L23.8, GLTSCR1              |
| chr3  | 149529930 | 149530987 | 1058 | * | 15 | 1.46125E-16 | 0.01119332  | 0.021882072 | 0.002236295 | 0.168427447  | 0.03497743   | RNF13, ANKUB1                       |
| chr1  | 3528355   | 3529108   | 754  | * | 5  | 7.32237E-10 | 0.015915314 | 0.021882482 | 0.008241203 | 0.067048017  | 0.007214411  |                                     |
| chr20 | 3775618   | 3776988   | 1371 | * | 17 | 1.0283E-14  | 0.01948187  | 0.021902893 | 0.00572557  | 0.068151153  | 0.008410236  | CDC25B                              |
| chr19 | 4066100   | 4067604   | 1505 | * | 15 | 6.52185E-13 | 0.117022739 | 0.021910719 | 0.004450162 | -0.061616451 | -0.023100553 | ZBTB7A                              |
| chr2  | 169312172 | 169312933 | 762  | * | 10 | 1.57369E-10 | 0.259506893 | 0.021980746 | 0.015249118 | 0.048097372  | 0.000450422  | CERS6                               |
| chr19 | 48547158  | 48547362  | 205  | * | 4  | 8.22719E-09 | 0.002911331 | 0.021988111 | 0.005823983 | 0.127581955  | 0.099306226  | CABP5                               |
| chr1  | 249152821 | 249154285 | 1465 | * | 13 | 2.68751E-15 | 0.007534935 | 0.021991702 | 0.000834259 | -0.144278193 | -0.024835586 | AL672294.1, ZNF692                  |
| chr19 | 4471492   | 4472531   | 1040 | * | 11 | 1.83205E-13 | 0.004255234 | 0.02201035  | 0.00338323  | -0.040908287 | -0.01116238  | HDGFRP2                             |
| chr3  | 14443428  | 14443694  | 267  | * | 5  | 4.75739E-10 | 0.002106358 | 0.022026434 | 0.004860334 | 0.103597074  | 0.057545332  |                                     |
| chr8  | 57359908  | 57360226  | 319  | * | 4  | 3.04377E-09 | 0.031322001 | 0.022030234 | 0.013809526 | 0.132782435  | 0.079471087  | RP11-17A4.2                         |
| chr3  | 39233997  | 39234148  | 152  | * | 3  | 9.04121E-09 | 0.000610695 | 0.022043745 | 0.001748646 | 0.105162887  | 0.077048255  | XIRP1                               |
| chr9  | 139871632 | 139872395 | 764  | * | 6  | 3.86363E-08 | 0.091772828 | 0.022051736 | 0.042239368 | -0.185648551 | -0.031222214 | PTGDS                               |
| chr17 | 74379499  | 74381784  | 2286 | * | 16 | 2.56329E-13 | 0.021386253 | 0.022054308 | 0.001759653 | -0.132253049 | -0.012360809 | SPHK1, PRPSAP1                      |
| chr19 | 19516893  | 19517029  | 137  | * | 4  | 1.32243E-08 | 0.001806067 | 0.022055463 | 0.00349315  | 0.036284455  | 0.008011907  | GATAD2A                             |
| chr9  | 33263879  | 33265144  | 1266 | * | 15 | 3.47657E-14 | 0.173743756 | 0.022067733 | 0.009135341 | -0.096016081 | -0.020642405 | CHMP5, BAG1                         |
| chr4  | 15375625  | 15375866  | 242  | * | 3  | 9.26476E-08 | 0.024191649 | 0.022090463 | 0.013550565 | 0.076721608  | 0.049863666  | C1QTNF7, RP11-665G4.1, RP11-484O2.1 |
| chr22 | 19701734  | 19702664  | 931  | * | 12 | 9.96161E-11 | 0.072302223 | 0.022093934 | 0.01943577  | 0.04038289   | 7.13499E-07  | SEPT5                               |
| chr4  | 2935996   | 2937381   | 1386 | * | 18 | 1.37548E-17 | 0.057285869 | 0.022124668 | 0.002983451 | 0.027506675  | -0.000444907 | NOP14-AS1, MFSD10                   |
| chr22 | 38349045  | 38349943  | 899  | * | 16 | 4.34942E-10 | 0.465599445 | 0.022133175 | 0.154322798 | -0.029104037 | -0.000576148 | POLR2F, C22orf23                    |
| chr19 | 17566260  | 17566626  | 367  | * | 4  | 1.68232E-08 | 0.000642347 | 0.022153249 | 0.002033723 | 0.074151754  | 0.062476717  | CTD-2521M24.10, NXNL1               |
| chr14 | 54976505  | 54977199  | 695  | * | 8  | 9.88371E-11 | 0.103419443 | 0.022186708 | 0.019775567 | -0.064946245 | -0.002008549 | CGRRF1                              |
| chr5  | 132165899 | 132166725 | 827  | * | 6  | 1.98277E-10 | 0.002477694 | 0.02221314  | 0.004137331 | 0.214672668  | 0.044611836  | SHROOM1                             |
| chr5  | 96298581  | 96299144  | 564  | * | 4  | 4.38804E-10 | 0.000278048 | 0.022222548 | 0.000806343 | 0.137203726  | 0.090522656  | LNPEP                               |
| chr11 | 118084192 | 118085281 | 1090 | * | 5  | 5.33899E-10 | 0.042861625 | 0.022235535 | 0.014925569 | -0.104186555 | -0.043657972 | AMICA1                              |
| chr17 | 5342414   | 5343211   | 798  | * | 9  | 5.44869E-10 | 0.05197559  | 0.022257926 | 0.040463839 | 0.065540278  | 0.01498656   | C1QBP                               |
| chr20 | 30406052  | 30407098  | 1047 | * | 9  | 1.33598E-13 | 0.016655976 | 0.022274066 | 0.002776288 | -0.208333576 | -0.057478219 |                                     |

|       |           |           |      |   |    |             |             |             |             |              |              |                      |
|-------|-----------|-----------|------|---|----|-------------|-------------|-------------|-------------|--------------|--------------|----------------------|
| chr7  | 36428656  | 36429476  | 821  | * | 6  | 2.6931E-10  | 0.046806839 | 0.022317557 | 0.031395163 | -0.061049854 | -0.021119007 | ANLN, KIAA0895       |
| chr15 | 90437671  | 90437891  | 221  | * | 5  | 4.22187E-08 | 0.0525688   | 0.022318567 | 0.010029561 | 0.050253227  | 0.014332816  | C15orf38-AP3S2       |
| chr10 | 3827200   | 3827321   | 122  | * | 2  | 1.70684E-07 | 0.007547951 | 0.022326337 | 0.010884776 | 0.039834492  | 0.025033078  | KLF6                 |
| chr5  | 86415878  | 86415900  | 23   | * | 2  | 1.24978E-07 | 0.00398399  | 0.022346482 | 0.006752659 | 0.099872487  | 0.077682675  | RP11-72L22.1         |
| chr12 | 105626788 | 105627446 | 659  | * | 5  | 6.28021E-08 | 0.009900814 | 0.022374207 | 0.00956949  | 0.076952164  | 0.039739634  | APPL2                |
| chr8  | 128519635 | 128520078 | 444  | * | 3  | 4.93181E-09 | 0.00025813  | 0.022374667 | 0.000877304 | 0.107566574  | 0.091447309  |                      |
| chr17 | 76126032  | 76126886  | 855  | * | 7  | 3.84499E-14 | 9.6848E-05  | 0.022387304 | 0.000289679 | -0.109218962 | -0.012311075 | TMC8, TMC6           |
| chr16 | 71894168  | 71894738  | 571  | * | 5  | 1.65895E-09 | 0.223625037 | 0.022409933 | 0.028539842 | 0.111444585  | 0.044426628  | ATXN1L, IST1, ZNF821 |
| chr15 | 41061384  | 41062224  | 841  | * | 10 | 1.68762E-22 | 7.10873E-09 | 0.022414689 | 4.0368E-07  | -0.201281578 | -0.100315948 | C15orf62, DNAJC17    |
| chr11 | 108092276 | 108094111 | 1836 | * | 39 | 8.38568E-19 | 0.272192588 | 0.022417049 | 0.077847265 | -0.059922475 | -0.008232167 | ATM, NPAT            |
| chr6  | 167040440 | 167041649 | 1210 | * | 10 | 5.5406E-16  | 4.57123E-05 | 0.022425329 | 0.000142579 | -0.108770777 | -0.017104325 | RPS6KA2              |
| chr7  | 148725440 | 148726390 | 951  | * | 9  | 8.02613E-11 | 0.001678849 | 0.022436716 | 0.002528744 | 0.028882725  | 0.005231752  | PDIA4                |
| chr13 | 41239125  | 41239152  | 28   | * | 2  | 8.7729E-08  | 0.051423995 | 0.022483882 | 0.034632138 | -0.012530163 | -0.009960941 | FOXO1                |
| chr17 | 37322028  | 37322540  | 513  | * | 5  | 5.74596E-10 | 0.001426712 | 0.022500308 | 0.002452297 | -0.204118446 | -0.105185867 | ARL5C                |
| chr7  | 21467390  | 21467723  | 334  | * | 4  | 3.76863E-09 | 0.005909909 | 0.022501824 | 0.004271429 | -0.073848732 | -0.011445807 | SP4                  |
| chr11 | 93582929  | 93583973  | 1045 | * | 10 | 1.58411E-09 | 0.102324198 | 0.022525049 | 0.017817322 | 0.09722615   | 0.028319048  | VSTM5                |
| chr11 | 13299888  | 13300784  | 897  | * | 5  | 2.52384E-09 | 0.005747879 | 0.022536198 | 0.008186544 | 0.046321898  | 0.026368211  | ARNTL                |
| chr22 | 38516736  | 38516895  | 160  | * | 3  | 1.46102E-08 | 0.000762558 | 0.022544755 | 0.001961278 | 0.113742404  | 0.065086189  | PLA2G6               |
| chr1  | 159893182 | 159894416 | 1235 | * | 12 | 5.96694E-11 | 0.12526144  | 0.022558562 | 0.043056215 | -0.069875705 | -0.01955373  | TAGLN2               |
| chr14 | 105955879 | 105958196 | 2318 | * | 22 | 1.09627E-19 | 0.057513648 | 0.022596501 | 0.002387519 | -0.037147756 | -0.002100638 | CRIP1, C14orf80      |
| chr22 | 31477504  | 31477754  | 251  | * | 5  | 5.33738E-09 | 0.062968038 | 0.022619318 | 0.022859923 | 0.047780446  | 0.022796213  | SMTN                 |
| chr16 | 75656489  | 75656847  | 359  | * | 3  | 3.59308E-08 | 0.018380314 | 0.02262581  | 0.016230853 | 0.024516789  | 0.011919566  | ADAT1                |
| chr1  | 155829430 | 155829652 | 223  | * | 3  | 9.63804E-09 | 0.008266941 | 0.02262881  | 0.006908293 | -0.097891932 | -0.023361105 | SYT11                |
| chr11 | 108422663 | 108423325 | 663  | * | 8  | 1.98509E-13 | 0.001149407 | 0.022645263 | 0.000671549 | 0.142495851  | 0.062296313  | EXPH5                |
| chr17 | 62207605  | 62208434  | 830  | * | 7  | 2.16669E-13 | 0.01067868  | 0.022650901 | 0.001873382 | 0.139102131  | 0.043571015  | ERN1                 |
| chr11 | 82444798  | 82445384  | 587  | * | 8  | 1.10384E-09 | 0.025798984 | 0.022710254 | 0.014889944 | 0.112010143  | 0.033558615  | FAM181B              |
| chr3  | 51422103  | 51423030  | 928  | * | 13 | 2.3807E-11  | 0.143423265 | 0.02271464  | 0.021296416 | -0.034242412 | -0.002199982 | MANF                 |
| chr1  | 10459573  | 10459695  | 123  | * | 2  | 4.14192E-08 | 0.003215557 | 0.022721056 | 0.00573244  | 0.018037313  | 0.016602153  | PGD                  |
| chr1  | 3585225   | 3585587   | 363  | * | 5  | 4.27798E-11 | 0.000209305 | 0.022744707 | 0.000530753 | -0.068544523 | -0.058655136 | TP73, RP5-1092A11.5  |

|       |           |           |      |   |    |             |             |             |             |              |              |                                               |
|-------|-----------|-----------|------|---|----|-------------|-------------|-------------|-------------|--------------|--------------|-----------------------------------------------|
| chr2  | 11533716  | 11533970  | 255  | * | 5  | 1.35991E-09 | 0.000711659 | 0.022770151 | 0.001700359 | 0.147944943  | 0.090818168  |                                               |
| chr11 | 64322994  | 64323456  | 463  | * | 7  | 3.97679E-11 | 0.004451849 | 0.022776976 | 0.002219682 | 0.143447026  | 0.067435751  | SLC22A11                                      |
| chr21 | 46340351  | 46341918  | 1568 | * | 12 | 4.53695E-18 | 1.14917E-05 | 0.02279585  | 6.57876E-05 | -0.195127263 | -0.081563881 | ITGB2-AS1, ITGB2                              |
| chr5  | 150603302 | 150605144 | 1843 | * | 14 | 4.54189E-09 | 0.061438262 | 0.022802633 | 0.006473626 | -0.113173447 | -0.005930931 | GM2A, CCDC69                                  |
| chr1  | 161474586 | 161475240 | 655  | * | 5  | 1.39415E-09 | 0.003664709 | 0.022817781 | 0.003048621 | -0.104653416 | -0.015039835 | FCGR2A                                        |
| chr13 | 73301012  | 73301231  | 220  | * | 5  | 7.35006E-09 | 0.01086408  | 0.022830153 | 0.016557492 | 0.022558007  | 0.0112136    | MZT1                                          |
| chr6  | 5004148   | 5004599   | 452  | * | 8  | 4.08979E-08 | 0.164892763 | 0.02283057  | 0.038977267 | -0.020782838 | 0.003921563  | RPP40                                         |
| chr14 | 61655727  | 61655919  | 193  | * | 4  | 1.76158E-09 | 0.000298957 | 0.022838505 | 0.001124829 | -0.08849398  | -0.002441393 | PRKCH                                         |
| chr19 | 10362061  | 10363328  | 1268 | * | 12 | 6.80092E-12 | 0.000813032 | 0.022851764 | 0.003441009 | -0.032216535 | -0.008289126 | MRPL4, CTD-2369P2.5                           |
| chr2  | 27434612  | 27435915  | 1304 | * | 21 | 3.19102E-16 | 0.130666821 | 0.02286611  | 0.020598944 | -0.043477484 | -0.00842561  | ATRAID, SLC5A6                                |
| chr19 | 56904442  | 56905587  | 1146 | * | 14 | 2.27338E-16 | 0.003421588 | 0.02287242  | 0.00122193  | 0.109107936  | 0.005001592  | ZNF582-AS1, ZNF582                            |
| chr17 | 75437512  | 75438188  | 677  | * | 5  | 9.38478E-11 | 0.000377647 | 0.022880125 | 0.001045466 | -0.184199918 | -0.073171618 | SEPT9                                         |
| chr19 | 6503884   | 6504030   | 147  | * | 3  | 7.32209E-10 | 0.000343957 | 0.022923886 | 0.001114533 | 0.149708825  | 0.100282599  |                                               |
| chr17 | 66196975  | 66197219  | 245  | * | 4  | 2.3172E-09  | 0.000492288 | 0.022990811 | 0.001417402 | 0.02598743   | 0.017774875  |                                               |
| chr1  | 153606178 | 153606818 | 641  | * | 10 | 5.81329E-09 | 0.041999755 | 0.022997441 | 0.0335267   | -0.046212444 | -0.01430369  | CHTOP, S100A13, RP1-178F15.5,<br>RP1-178F15.4 |
| chr12 | 10095902  | 10096794  | 893  | * | 6  | 1.22792E-13 | 3.84775E-06 | 0.022997467 | 4.21336E-05 | -0.207362199 | -0.159289841 | AC091814.2                                    |
| chr7  | 87505059  | 87506111  | 1053 | * | 15 | 1.11823E-14 | 0.025321317 | 0.023023382 | 0.005865508 | -0.036665617 | -0.000234721 | DBF4, SLC25A40                                |
| chr17 | 54857463  | 54858161  | 699  | * | 6  | 5.55122E-09 | 0.005862167 | 0.023023543 | 0.007118251 | -0.035086678 | -0.002175167 |                                               |
| chr19 | 2427407   | 2428350   | 944  | * | 8  | 1.96785E-09 | 0.158428481 | 0.023027879 | 0.028692579 | -0.02086862  | -0.001451516 | TIMM13, LMNB2                                 |
| chr5  | 75919188  | 75919481  | 294  | * | 5  | 2.71604E-09 | 0.00983761  | 0.023050092 | 0.005031331 | -0.087663925 | -0.049032676 | IQGAP2, F2RL2                                 |
| chr7  | 129410417 | 129411088 | 672  | * | 7  | 4.70851E-12 | 0.000142768 | 0.023060536 | 0.000645902 | 0.114775581  | 0.074489486  |                                               |
| chr6  | 44309765  | 44310331  | 567  | * | 8  | 8.05969E-10 | 0.016162862 | 0.023081391 | 0.016246106 | -0.078815508 | -0.026914356 | RP11-444E17.6                                 |
| chr15 | 75940069  | 75940778  | 710  | * | 8  | 5.45124E-09 | 0.113582242 | 0.023100573 | 0.052388912 | 0.025419017  | -0.000437189 | SNX33, IMP3                                   |
| chr2  | 38831166  | 38831576  | 411  | * | 2  | 1.64051E-08 | 0.00636175  | 0.023131986 | 0.009732105 | -0.169991368 | -0.114380284 |                                               |
| chr4  | 77870047  | 77870605  | 559  | * | 3  | 1.96173E-08 | 0.03182976  | 0.02315509  | 0.013016219 | -0.056712965 | -0.015475698 |                                               |
| chr6  | 53409368  | 53410182  | 815  | * | 11 | 1.05263E-10 | 0.130593097 | 0.023169436 | 0.031124484 | 0.058832106  | 0.009325454  | GCLC                                          |
| chr16 | 57831745  | 57832760  | 1016 | * | 11 | 2.34535E-18 | 3.5675E-05  | 0.023187187 | 3.02607E-05 | 0.144311558  | 0.0904957    | CTD-2600O9.1, KIFC3                           |
| chr8  | 142137922 | 142139341 | 1420 | * | 12 | 3.8273E-12  | 0.001313332 | 0.023188509 | 0.000638336 | -0.031020574 | 0.004086644  | DENND3, RP11-809O17.1                         |
| chr17 | 79848761  | 79850075  | 1315 | * | 17 | 7.37665E-13 | 0.163810327 | 0.023210287 | 0.027012706 | 0.036631482  | 0.002559322  | ANAPC11, ALYREF                               |

|       |           |           |      |   |    |             |             |             |             |              |              |                         |
|-------|-----------|-----------|------|---|----|-------------|-------------|-------------|-------------|--------------|--------------|-------------------------|
| chr2  | 110371114 | 110371903 | 790  | * | 13 | 2.96426E-10 | 0.292315448 | 0.023245716 | 0.079814094 | -0.054490065 | -0.006324762 | SEPT10                  |
| chr1  | 202775609 | 202776513 | 905  | * | 7  | 1.99046E-12 | 0.003665549 | 0.023257169 | 0.001177815 | -0.043820393 | -0.014582006 | KDM5B                   |
| chr6  | 99275622  | 99275960  | 339  | * | 3  | 1.06603E-08 | 0.034547648 | 0.02327116  | 0.029366418 | 0.037571864  | 0.026393767  |                         |
| chr3  | 127311038 | 127311169 | 132  | * | 3  | 3.96663E-09 | 0.002083592 | 0.023275862 | 0.004031004 | -0.090769179 | -0.073098093 | TPRA1                   |
| chr1  | 41156520  | 41157111  | 592  | * | 7  | 2.5895E-10  | 0.171283141 | 0.023290969 | 0.029186232 | 0.141828331  | 0.045554629  | NFYC-AS1                |
| chr1  | 150459835 | 150459957 | 123  | * | 3  | 1.87012E-07 | 0.015957642 | 0.02330037  | 0.008477952 | -0.05155371  | -0.03144056  | TARS2                   |
| chr7  | 47344579  | 47344750  | 172  | * | 4  | 7.65549E-09 | 0.001225401 | 0.023301995 | 0.002466457 | 0.153576073  | 0.088367928  | TNS3                    |
| chr12 | 58145750  | 58146835  | 1086 | * | 20 | 9.85468E-12 | 0.064304733 | 0.023305582 | 0.05307899  | -0.040994532 | 0.002231368  | CDK4                    |
| chr3  | 49057935  | 49059487  | 1553 | * | 19 | 1.45802E-15 | 0.047816808 | 0.023311016 | 0.014725299 | -0.038570893 | -0.002843187 | NDUFAF3, DALRD3, MIR191 |
| chr4  | 141071988 | 141072046 | 59   | * | 2  | 7.6462E-08  | 0.002709778 | 0.023325316 | 0.005030081 | -0.028578853 | -0.009191132 | MAML3                   |
| chr9  | 110045901 | 110046355 | 455  | * | 5  | 9.67088E-10 | 0.01577423  | 0.023326426 | 0.005658569 | 0.023813859  | 0.013591615  | RAD23B                  |
| chr11 | 123984775 | 123984852 | 78   | * | 2  | 3.56515E-08 | 0.004741574 | 0.023336342 | 0.007824146 | 0.092363899  | 0.09066528   |                         |
| chr8  | 144639260 | 144640556 | 1297 | * | 13 | 1.03451E-14 | 0.001797543 | 0.023342147 | 0.000158507 | -0.133890565 | -0.017391294 | GSDMD                   |
| chr17 | 3433157   | 3433451   | 295  | * | 3  | 9.89019E-08 | 0.05168758  | 0.023362776 | 0.010274601 | 0.1445982    | 0.09285362   | TRPV3                   |
| chr16 | 2015448   | 2015450   | 3    | * | 2  | 9.8024E-08  | 0.002882369 | 0.023368907 | 0.005290317 | -0.078861582 | -0.063306023 | SNHG9                   |
| chr12 | 12869398  | 12871110  | 1713 | * | 19 | 2.21788E-17 | 0.018058468 | 0.023370395 | 0.003268663 | -0.11819539  | -0.015027604 | CDKN1B                  |
| chr6  | 154799632 | 154799716 | 85   | * | 3  | 1.78593E-07 | 0.002216123 | 0.023371593 | 0.00382612  | -0.127894654 | -0.078544119 | CNKSR3                  |
| chr6  | 11093513  | 11094883  | 1371 | * | 15 | 7.03388E-16 | 0.000246011 | 0.023380265 | 0.000783952 | 0.032237273  | 0.004059966  | SMIM13                  |
| chr3  | 185270308 | 185270558 | 251  | * | 4  | 5.89423E-10 | 0.003897228 | 0.023436042 | 0.002340467 | 0.14084731   | 0.08590591   | LIPH                    |
| chr19 | 7983606   | 7984171   | 566  | * | 7  | 1.1858E-09  | 0.029066746 | 0.0234515   | 0.01270221  | 0.14422192   | 0.041948025  | TGFBR3L, CTD-3193O13.1  |
| chr17 | 73874443  | 73874790  | 348  | * | 7  | 6.28497E-10 | 0.027365883 | 0.023456086 | 0.010183533 | 0.037639668  | 0.015227967  | RP11-552F3.9, TRIM47    |
| chr6  | 43737555  | 43738026  | 472  | * | 6  | 4.62849E-11 | 0.010415346 | 0.023464782 | 0.007624799 | -0.066359131 | -0.004384041 | VEGFA                   |
| chr1  | 18902086  | 18902229  | 144  | * | 3  | 7.06919E-08 | 0.000729337 | 0.023495751 | 0.002028699 | 0.24698913   | 0.215953295  |                         |
| chr14 | 65230287  | 65231319  | 1033 | * | 5  | 2.38012E-10 | 0.000612994 | 0.023521224 | 0.000673587 | -0.116179715 | -0.071692481 | SPTB                    |
| chr1  | 100503189 | 100504499 | 1311 | * | 13 | 1.56444E-13 | 0.020626483 | 0.023563562 | 0.008853013 | 0.040530378  | 0.008699753  | HIAT1                   |
| chr16 | 71523144  | 71524135  | 992  | * | 11 | 2.89599E-19 | 1.30447E-05 | 0.02356675  | 2.27884E-05 | 0.169742659  | 0.073303852  | AC010547.9, ZNF19       |
| chr6  | 110011968 | 110012723 | 756  | * | 15 | 1.01612E-09 | 0.484068325 | 0.023603511 | 0.181127755 | -0.057762279 | -0.010243121 | FIG4, AK9               |
| chr15 | 62352174  | 62353290  | 1117 | * | 13 | 2.97063E-12 | 0.018361579 | 0.023607076 | 0.008798955 | -0.030595939 | 0.005034178  | RP11-643M14.1, VPS13C   |
| chr6  | 28557823  | 28557883  | 61   | * | 3  | 1.75058E-07 | 0.004021155 | 0.023629022 | 0.00629217  | 0.043064806  | 0.032068635  | RP5-1186N24.3, SCAND3   |

|       |           |           |      |   |    |             |             |             |             |              |              |                            |
|-------|-----------|-----------|------|---|----|-------------|-------------|-------------|-------------|--------------|--------------|----------------------------|
| chr21 | 46830529  | 46830534  | 6    | * | 2  | 2.29121E-08 | 0.002926875 | 0.023709095 | 0.005376024 | 0.10078887   | 0.098986156  | COL18A1                    |
| chr12 | 4488749   | 4489779   | 1031 | * | 9  | 3.57591E-15 | 0.00010097  | 0.023724341 | 0.000212998 | 0.188500259  | 0.085492396  | FGF23                      |
| chr7  | 148581708 | 148582347 | 640  | * | 5  | 8.02549E-11 | 0.00839821  | 0.023744801 | 0.002963276 | 0.092560121  | -0.001013329 |                            |
| chr13 | 114126424 | 114126476 | 53   | * | 3  | 9.54406E-08 | 0.024230823 | 0.023769344 | 0.009439084 | -0.072432988 | -0.037576939 | DCUN1D2-AS, DCUN1D2        |
| chr20 | 23343673  | 23344170  | 498  | * | 4  | 3.22469E-08 | 0.003912056 | 0.023832173 | 0.004395823 | 0.072720899  | 0.050285735  | GZF1                       |
| chr17 | 79196677  | 79196758  | 82   | * | 4  | 1.81611E-07 | 0.00359214  | 0.0238549   | 0.005504041 | 0.034970461  | 0.025223967  | AZI1                       |
| chr2  | 101925327 | 101925483 | 157  | * | 5  | 1.46646E-07 | 0.01198981  | 0.023869998 | 0.013768307 | -0.021567822 | 0.004142858  |                            |
| chr16 | 23652268  | 23653174  | 907  | * | 12 | 3.62099E-09 | 0.144627595 | 0.023909552 | 0.053529011 | 0.031628646  | 0.002611964  | DCTN5, PALB2               |
| chr17 | 41977951  | 41978218  | 268  | * | 7  | 5.90059E-08 | 0.02462521  | 0.023931787 | 0.016908672 | -0.035001874 | -0.004822823 | MPP2                       |
| chr17 | 56356470  | 56356963  | 494  | * | 3  | 1.48048E-10 | 0.001425774 | 0.023963127 | 0.003433733 | -0.151805068 | -0.089119543 | MPO                        |
| chr1  | 26735846  | 26736154  | 309  | * | 6  | 1.04419E-07 | 0.162323018 | 0.02396347  | 0.061067095 | 0.018488754  | 0.012364373  |                            |
| chr22 | 41215939  | 41216528  | 590  | * | 5  | 1.36768E-10 | 0.005471274 | 0.023974819 | 0.002784569 | -0.101914746 | -0.020013395 |                            |
| chr17 | 78417789  | 78418426  | 638  | * | 7  | 1.70663E-11 | 0.015924222 | 0.024006054 | 0.002598635 | 0.144080611  | 0.08381934   |                            |
| chr11 | 62104220  | 62105152  | 933  | * | 8  | 4.47304E-12 | 0.05177045  | 0.024007257 | 0.00866878  | -0.174298593 | -0.03803784  | ASRGL1, RP11-703H8.7       |
| chr4  | 139937227 | 139937474 | 248  | * | 4  | 3.4805E-09  | 0.034445725 | 0.02401299  | 0.012928519 | 0.033113557  | 0.016928789  | CCRN4L                     |
| chr6  | 31782374  | 31783468  | 1095 | * | 23 | 9.14557E-12 | 0.655717864 | 0.02401369  | 0.280395924 | -0.046378345 | -0.00362978  | HSPA1A, HSPA1L             |
| chr2  | 26100811  | 26101831  | 1021 | * | 11 | 6.291E-12   | 0.028351102 | 0.024026202 | 0.007170627 | 0.060702257  | 0.014008049  | ASXL2                      |
| chr19 | 38825649  | 38827205  | 1557 | * | 12 | 4.08563E-16 | 0.000840244 | 0.024031773 | 0.00016447  | -0.114444891 | -0.028428339 | CATSPERG                   |
| chr2  | 27712243  | 27713158  | 916  | * | 16 | 5.98749E-14 | 0.008997483 | 0.024060836 | 0.006272686 | 0.158796643  | 0.029873775  | IFT172                     |
| chr8  | 135725535 | 135726252 | 718  | * | 5  | 7.28358E-11 | 0.000948348 | 0.024066884 | 0.001671157 | 0.173133378  | 0.035103369  |                            |
| chr19 | 10449942  | 10450472  | 531  | * | 8  | 1.99123E-10 | 0.429124972 | 0.024098551 | 0.070375302 | -0.189154995 | -0.026171371 | ICAM3                      |
| chr2  | 219745647 | 219745748 | 102  | * | 2  | 1.19009E-08 | 0.002924951 | 0.024172093 | 0.005399722 | 0.082097852  | 0.05120285   | WNT10A                     |
| chr10 | 17270232  | 17271079  | 848  | * | 11 | 2.09487E-10 | 0.14459587  | 0.024196218 | 0.037112819 | -0.053290212 | -0.011342293 | VIM, VIM-AS1               |
| chr16 | 71660734  | 71660786  | 53   | * | 2  | 6.88201E-08 | 0.00272583  | 0.024213674 | 0.005101513 | 0.046935443  | 0.030804625  | MARVELD3                   |
| chr4  | 77226417  | 77227162  | 746  | * | 6  | 6.29284E-11 | 0.002249164 | 0.024252653 | 0.003670458 | -0.039861977 | -0.023460532 | FAM47E-STBD1, FAM47E-STBD1 |
| chr5  | 179233770 | 179233875 | 106  | * | 4  | 1.94941E-07 | 0.166538963 | 0.024257346 | 0.060369663 | -0.028828468 | -0.008757199 | SQSTM1, MGAT4B             |
| chr16 | 70780647  | 70780947  | 301  | * | 4  | 2.40699E-10 | 9.50213E-05 | 0.02427347  | 0.000447445 | -0.129250172 | -0.086037181 | VAC14                      |
| chr6  | 33280390  | 33282624  | 2235 | * | 43 | 5.92421E-19 | 0.194222064 | 0.024273681 | 0.060830133 | -0.042519794 | -0.002217683 | TAPBP, ZBTB22              |
| chr5  | 139078511 | 139078529 | 19   | * | 2  | 9.55132E-08 | 0.003127012 | 0.024291579 | 0.005705943 | 0.092430085  | 0.086671628  | CTB-35F21.1                |

|       |           |           |      |   |    |             |             |             |             |              |              |                             |
|-------|-----------|-----------|------|---|----|-------------|-------------|-------------|-------------|--------------|--------------|-----------------------------|
| chr5  | 176560594 | 176561193 | 600  | * | 4  | 6.76036E-09 | 0.147112596 | 0.024303999 | 0.031737687 | -0.011050409 | -0.002091442 | NSD1                        |
| chr16 | 30485296  | 30485966  | 671  | * | 7  | 9.15503E-13 | 0.000755489 | 0.024328743 | 0.001049025 | -0.243240746 | -0.019724695 | ITGAL                       |
| chr12 | 54120876  | 54122179  | 1304 | * | 14 | 4.42951E-13 | 0.011602992 | 0.024330173 | 0.009258067 | -0.064614374 | -0.008363049 | CALCOCO1                    |
| chr1  | 22109860  | 22111043  | 1184 | * | 8  | 8.43926E-11 | 0.001455775 | 0.024340094 | 0.004529895 | 0.188077006  | 0.021849748  | USP48                       |
| chr8  | 11659727  | 11660968  | 1242 | * | 18 | 3.80724E-14 | 0.021870823 | 0.024360716 | 0.015009845 | 0.032819808  | 0.001754507  | FDFT1, RP11-297N6.4         |
| chr17 | 74366059  | 74366578  | 520  | * | 3  | 2.19065E-08 | 0.000369507 | 0.024390581 | 0.001201974 | 0.089480476  | 0.082766835  | PRPSAP1                     |
| chr12 | 109250445 | 109250988 | 544  | * | 5  | 9.13459E-09 | 0.005027874 | 0.024497151 | 0.009083934 | -0.05995918  | -0.027345204 | SSH1                        |
| chr5  | 176738672 | 176739172 | 501  | * | 6  | 5.01954E-11 | 0.022760579 | 0.02451327  | 0.00454269  | 0.045513426  | -0.001027129 | MXD3                        |
| chr1  | 207242569 | 207242586 | 18   | * | 2  | 2.64164E-08 | 0.003723269 | 0.024516668 | 0.006574889 | -0.146143397 | -0.13994855  | PFKFB2                      |
| chr4  | 106816089 | 106816136 | 48   | * | 2  | 7.08178E-08 | 0.005297003 | 0.02453493  | 0.008647623 | -0.075069972 | -0.017527704 | NPNT, INTS12                |
| chr7  | 43909588  | 43909721  | 134  | * | 3  | 1.74898E-08 | 0.015260616 | 0.02456378  | 0.019215252 | -0.034960417 | -0.015133035 | URGCP-MRPS24                |
| chr3  | 183902771 | 183903567 | 797  | * | 6  | 1.38456E-09 | 0.045819829 | 0.024597993 | 0.035198266 | 0.105014689  | 0.048926941  | EIF2B5                      |
| chr1  | 150995449 | 150995772 | 324  | * | 3  | 1.85443E-08 | 0.000491051 | 0.024601262 | 0.001510342 | 0.099576019  | 0.072575167  | PRUNE                       |
| chr9  | 116355097 | 116355621 | 525  | * | 4  | 3.41581E-09 | 0.000585779 | 0.024602538 | 0.001990699 | 0.093309106  | 0.053436904  | RGS3                        |
| chr17 | 46811492  | 46811527  | 36   | * | 2  | 3.41782E-08 | 0.009241323 | 0.024611272 | 0.013030747 | 0.024160526  | 0.021954609  |                             |
| chr12 | 113909234 | 113909718 | 485  | * | 3  | 2.62169E-08 | 0.020315747 | 0.024620166 | 0.021698115 | 0.076319808  | 0.03374434   | LHX5                        |
| chr1  | 31769247  | 31770205  | 959  | * | 14 | 2.55337E-12 | 0.03979762  | 0.024636878 | 0.007711961 | 0.031309741  | -0.002467296 | ZCCHC17, SNRNP40            |
| chr17 | 66031745  | 66031871  | 127  | * | 8  | 1.11426E-07 | 0.048216962 | 0.024640421 | 0.028484716 | -0.059774493 | -0.00060633  | KPNA2                       |
| chr4  | 54929912  | 54931210  | 1299 | * | 9  | 5.53609E-13 | 0.0005949   | 0.024664331 | 0.000721681 | -0.05673859  | -0.006745628 | FIP1L1, CHIC2               |
| chr17 | 38443649  | 38443899  | 251  | * | 5  | 4.477E-08   | 0.088102485 | 0.024666453 | 0.037785713 | -0.053887645 | -0.013080944 | CDC6                        |
| chr9  | 127961717 | 127961907 | 191  | * | 3  | 3.34057E-08 | 0.006409341 | 0.024668896 | 0.008755906 | 0.122678875  | 0.090455051  |                             |
| chr5  | 176816539 | 176816828 | 290  | * | 4  | 1.20817E-07 | 0.003669869 | 0.024697451 | 0.007189937 | 0.090811509  | 0.061065875  | SLC34A1                     |
| chr11 | 18034355  | 18035136  | 782  | * | 13 | 7.45144E-08 | 0.585693722 | 0.024798683 | 0.140245121 | 0.042107412  | -0.0018771   | SERGEF, RP1-59M18.2         |
| chr18 | 12883603  | 12884567  | 965  | * | 10 | 1.3873E-14  | 0.000668411 | 0.024817922 | 0.001539894 | 0.024320598  | 0.003385986  | PTPN2                       |
| chr12 | 124117938 | 124119250 | 1313 | * | 18 | 1.9238E-11  | 0.322689719 | 0.024887277 | 0.064871768 | -0.147893561 | -0.004803416 | GTF2H3, EIF2B1              |
| chr19 | 10735474  | 10736448  | 975  | * | 10 | 6.10457E-15 | 0.008024115 | 0.024893859 | 0.001698156 | -0.129607833 | -0.040603107 | SLC44A2                     |
| chr10 | 126479779 | 126480372 | 594  | * | 4  | 1.08804E-08 | 0.013632323 | 0.024938407 | 0.013285512 | -0.052553027 | -0.018061817 | RP11-12J10.3, METTL10       |
| chr6  | 10881782  | 10881949  | 168  | * | 4  | 7.24552E-08 | 0.063687907 | 0.02497657  | 0.011469754 | 0.040913199  | 0.025945046  | RP11-637O19.3, SYCP2L, GCM2 |
| chr6  | 35887678  | 35888885  | 1208 | * | 8  | 6.88131E-13 | 0.007352203 | 0.025005644 | 0.005112391 | -0.049048658 | -0.016081649 | SRPK1                       |

|       |           |           |      |   |    |             |             |             |             |              |              |                                |
|-------|-----------|-----------|------|---|----|-------------|-------------|-------------|-------------|--------------|--------------|--------------------------------|
| chr19 | 38041156  | 38041600  | 445  | * | 3  | 4.176E-09   | 0.003678982 | 0.025031102 | 0.007093354 | -0.043813533 | -0.010276261 | ZNF571-AS1                     |
| chr12 | 22696567  | 22697784  | 1218 | * | 15 | 1.10335E-16 | 5.08431E-05 | 0.025038955 | 0.00021106  | 0.101800094  | 0.017228507  | C2CD5                          |
| chr10 | 28821963  | 28822500  | 538  | * | 11 | 4.25707E-10 | 0.009974891 | 0.025083249 | 0.016760689 | -0.0845419   | -0.010308483 | WAC                            |
| chr2  | 219433334 | 219434220 | 887  | * | 10 | 1.23556E-09 | 0.020337237 | 0.025087361 | 0.014533743 | 0.023626543  | 0.003891392  | RQCD1                          |
| chr3  | 184870137 | 184871070 | 934  | * | 11 | 2.86945E-14 | 0.018031621 | 0.025087632 | 0.003977866 | -0.05795972  | -0.011013325 | C3orf70                        |
| chr7  | 150777171 | 150778724 | 1554 | * | 14 | 2.44887E-16 | 0.005177379 | 0.025100704 | 0.001420491 | 0.079197238  | -0.003791485 | FASTK, TMUB1                   |
| chr2  | 220093858 | 220095334 | 1477 | * | 21 | 8.54832E-16 | 0.02094002  | 0.025118419 | 0.007306338 | -0.077191219 | -0.001798693 | ANKZF1, ATG9A                  |
| chr13 | 60737991  | 60738538  | 548  | * | 13 | 1.23247E-08 | 0.281460718 | 0.025136414 | 0.139108863 | 0.027995202  | 0.002163232  | DIAPH3                         |
| chr11 | 15962841  | 15963167  | 327  | * | 5  | 8.36794E-09 | 0.020604266 | 0.025148701 | 0.005800442 | 0.14413943   | 0.075084839  |                                |
| chr6  | 30709428  | 30713026  | 3599 | * | 71 | 2.96531E-32 | 0.001096091 | 0.025156901 | 0.000654411 | 0.066262125  | -0.002142382 | XXbac-BPG252P9.10, FLOT1, IER3 |
| chr14 | 24610792  | 24611268  | 477  | * | 11 | 2.83107E-08 | 0.100206006 | 0.02516501  | 0.063778077 | 0.029493465  | 0.006031591  | EMC9                           |
| chr16 | 87886582  | 87886933  | 352  | * | 4  | 3.61525E-08 | 0.007854986 | 0.025171546 | 0.006742015 | 0.114540422  | 0.017968467  | SLC7A5                         |
| chr1  | 1850263   | 1851910   | 1648 | * | 21 | 9.55684E-15 | 0.000635747 | 0.025189136 | 0.001464493 | -0.102544116 | -0.017420832 | TMEM52                         |
| chr6  | 2876395   | 2877211   | 817  | * | 6  | 1.54368E-10 | 0.003267818 | 0.025207997 | 0.002776268 | 0.090827025  | -0.000533369 | RP11-420G6.4                   |
| chr22 | 31835691  | 31836332  | 642  | * | 5  | 1.01669E-09 | 0.007882668 | 0.025212685 | 0.00359531  | 0.138328372  | 0.076536628  | DRG1, EIF4ENIF1                |
| chr1  | 207992084 | 207992469 | 386  | * | 3  | 9.59224E-08 | 0.025869387 | 0.025257753 | 0.024474885 | 0.121138182  | 0.056121386  | C1orf132                       |
| chr19 | 10514249  | 10514734  | 486  | * | 8  | 9.62932E-10 | 0.037272799 | 0.025336481 | 0.020827709 | -0.026231357 | 0.000547615  | CDC37                          |
| chr6  | 28543508  | 28543693  | 186  | * | 4  | 7.04036E-09 | 0.002480062 | 0.025356572 | 0.004329635 | 0.101480649  | 0.066539671  | SCAND3                         |
| chr8  | 124214953 | 124215152 | 200  | * | 4  | 1.00188E-07 | 0.00495038  | 0.025389045 | 0.008045769 | 0.153665688  | 0.090756372  | FAM83A, FAM83A-AS1             |
| chr18 | 9334488   | 9335102   | 615  | * | 8  | 5.6059E-11  | 0.001962924 | 0.0254068   | 0.003692781 | -0.082381622 | -0.042777685 | TWSG1                          |
| chr2  | 95537197  | 95537475  | 279  | * | 4  | 1.10725E-08 | 0.013199588 | 0.02547257  | 0.007604622 | 0.148951596  | 0.097312246  | TEKT4, AC097374.2              |
| chr2  | 68693636  | 68695071  | 1436 | * | 12 | 1.25269E-12 | 0.001595318 | 0.025493278 | 0.00207833  | -0.208218855 | -0.027881099 | APLF, FBXO48                   |
| chr2  | 87018585  | 87019492  | 908  | * | 8  | 7.34809E-11 | 0.013657001 | 0.025496821 | 0.008596603 | 0.128671179  | 0.052248415  | CD8A                           |
| chr17 | 57918262  | 57918682  | 421  | * | 5  | 7.16167E-11 | 0.000105785 | 0.02550976  | 0.000437771 | 0.094341342  | 0.075689693  | VMP1, MIR21                    |
| chr11 | 85375464  | 85375937  | 474  | * | 3  | 2.64106E-08 | 0.033610969 | 0.025510194 | 0.018342117 | 0.03307017   | 0.016708574  | CREBZF                         |
| chr14 | 99736462  | 99737609  | 1148 | * | 8  | 6.14686E-11 | 0.097072197 | 0.025517404 | 0.013516601 | 0.047606812  | 0.014181093  | BCL11B                         |
| chr16 | 11723091  | 11724177  | 1087 | * | 5  | 1.75909E-09 | 0.000113792 | 0.02552022  | 0.000514225 | -0.16255214  | -0.100451894 | LITAF                          |
| chr5  | 122180749 | 122181105 | 357  | * | 8  | 9.40292E-08 | 0.171441885 | 0.025543494 | 0.064971147 | 0.017987753  | 0.001711305  | SNX24                          |
| chr3  | 71113568  | 71114771  | 1204 | * | 9  | 1.18058E-13 | 0.055827208 | 0.025577354 | 0.004623401 | -0.13796132  | -0.008414491 | FOXP1                          |

|       |           |           |      |   |    |             |             |             |             |              |              |                           |
|-------|-----------|-----------|------|---|----|-------------|-------------|-------------|-------------|--------------|--------------|---------------------------|
| chr10 | 127512596 | 127512887 | 292  | * | 2  | 7.89289E-08 | 0.036342838 | 0.025600272 | 0.031308488 | 0.023408209  | 0.02041401   | BCCIP                     |
| chr7  | 30027454  | 30028890  | 1437 | * | 7  | 1.06266E-11 | 0.002964566 | 0.025611191 | 0.001950979 | -0.093215554 | -0.036365125 | AC007285.6, SCRNI         |
| chr4  | 668354    | 668877    | 524  | * | 3  | 6.78251E-09 | 0.289003573 | 0.025616162 | 0.037769908 | 0.057169922  | 0.03074097   | MYL5                      |
| chr6  | 30749279  | 30749628  | 350  | * | 4  | 4.65005E-09 | 0.00193116  | 0.025627426 | 0.002228577 | -0.048322603 | -0.034274332 | HCG20                     |
| chr12 | 122617356 | 122617908 | 553  | * | 6  | 8.79403E-09 | 0.179444315 | 0.025633511 | 0.026745657 | 0.140907937  | 0.042437628  | MLXIP                     |
| chr19 | 39340777  | 39341449  | 673  | * | 5  | 4.5921E-10  | 0.06272604  | 0.02564914  | 0.026398832 | 0.020020536  | 0.007653758  | HNRNPL                    |
| chr3  | 53925831  | 53925981  | 151  | * | 3  | 1.39178E-07 | 0.073078436 | 0.025691462 | 0.039820026 | 0.031709527  | 0.005144164  | SELK                      |
| chr17 | 38135812  | 38137489  | 1678 | * | 16 | 9.01377E-18 | 0.000257884 | 0.025694794 | 0.000165491 | 0.16455383   | 0.009833856  | PSMD3                     |
| chr11 | 789849    | 790293    | 445  | * | 8  | 8.21059E-12 | 0.002826678 | 0.025705606 | 0.003036346 | 0.111837415  | 0.02591746   | CEND1                     |
| chr5  | 55290639  | 55291546  | 908  | * | 13 | 2.19793E-13 | 0.012736353 | 0.025710361 | 0.005787347 | -0.12142629  | -0.016149417 | CTD-2031P19.3, IL6ST      |
| chr12 | 49372162  | 49373263  | 1102 | * | 8  | 2.33614E-11 | 0.001516492 | 0.025715742 | 0.003343057 | 0.060135544  | 0.025096068  | WNT1                      |
| chr7  | 130130122 | 130132453 | 2332 | * | 50 | 8.6222E-40  | 6.43748E-05 | 0.025725114 | 8.98621E-06 | -0.173755356 | -0.05705639  | MEST                      |
| chr16 | 4673918   | 4674018   | 101  | * | 4  | 8.8782E-08  | 0.008611555 | 0.025758655 | 0.013296663 | -0.24890174  | -0.097764889 | MGRN1                     |
| chr16 | 9055493   | 9056115   | 623  | * | 7  | 1.5933E-09  | 0.147434133 | 0.025772178 | 0.018445902 | 0.135209345  | 0.036580376  | USP7                      |
| chr14 | 102605829 | 102606609 | 781  | * | 12 | 1.53914E-15 | 0.001839803 | 0.025782753 | 0.001662914 | -0.035380741 | 0.000693272  | WDR20, HSP90AA1           |
| chr4  | 76649539  | 76650351  | 813  | * | 11 | 1.46712E-11 | 0.094331001 | 0.025791787 | 0.022790274 | -0.064581732 | -0.008200262 | USO1, G3BP2               |
| chr6  | 24494605  | 24494793  | 189  | * | 4  | 3.9479E-08  | 0.026014865 | 0.025792214 | 0.016622663 | 0.077308802  | 0.048068932  | GPLD1                     |
| chr6  | 32135129  | 32138839  | 3711 | * | 41 | 1.5381E-21  | 0.097872682 | 0.025799146 | 0.001793589 | 0.178859369  | 0.028384312  | PPT2-EGFL8, EGFL8, AGPAT1 |
| chr4  | 123653918 | 123654127 | 210  | * | 4  | 6.5311E-09  | 0.07160461  | 0.025817072 | 0.018091048 | -0.043396084 | -0.005019976 | BBS12                     |
| chr17 | 75473344  | 75474070  | 727  | * | 6  | 5.7695E-12  | 0.000189732 | 0.025818133 | 0.000455396 | 0.119153216  | 0.079179633  | SEPT9                     |
| chr10 | 125650957 | 125651726 | 770  | * | 11 | 9.80745E-10 | 0.031719731 | 0.025829304 | 0.027317846 | -0.090134454 | 0.00089398   | CPXM2                     |
| chr2  | 38602911  | 38603784  | 874  | * | 8  | 3.85903E-13 | 0.003934092 | 0.025862621 | 0.002507737 | -0.045905535 | 0.0009408    | ATL2                      |
| chr17 | 73257138  | 73257286  | 149  | * | 3  | 5.03109E-08 | 0.0186481   | 0.025880147 | 0.014754104 | 0.024519527  | 0.013965988  | GGA3                      |
| chr6  | 28248578  | 28249704  | 1127 | * | 13 | 1.78628E-10 | 0.177406858 | 0.025881154 | 0.038428607 | -0.041630973 | 0.004763624  | PGBD1                     |
| chr1  | 94057247  | 94057587  | 341  | * | 4  | 4.89496E-09 | 0.000579353 | 0.025905569 | 0.001802151 | -0.211965808 | -0.083102718 | BCAR3                     |
| chr16 | 1047460   | 1048154   | 695  | * | 6  | 3.33936E-11 | 0.003426631 | 0.025909289 | 0.0020138   | 0.098395068  | 0.066096342  | RP11-161M6.3              |
| chr3  | 101394920 | 101396021 | 1102 | * | 11 | 2.93808E-13 | 0.042699182 | 0.025916778 | 0.016066077 | -0.051956385 | -0.002667598 | ZBTB11-AS1, ZBTB11        |
| chr7  | 157646656 | 157647847 | 1192 | * | 8  | 2.38125E-15 | 0.000379083 | 0.025918221 | 0.000262546 | -0.201335222 | -0.106434273 | AC011899.9, PTPRN2        |
| chr17 | 8125848   | 8126456   | 609  | * | 4  | 9.89399E-09 | 0.005977874 | 0.02593137  | 0.007183531 | 0.028038417  | 0.014446964  | LINC00324                 |



|       |           |           |      |   |    |             |             |             |             |              |              |                        |
|-------|-----------|-----------|------|---|----|-------------|-------------|-------------|-------------|--------------|--------------|------------------------|
| chr16 | 88564247  | 88565080  | 834  | * | 4  | 1.08348E-10 | 0.00103869  | 0.025931371 | 0.00225575  | 0.119704911  | 0.103026549  | ZFPM1                  |
| chr20 | 49573966  | 49575492  | 1527 | * | 16 | 2.49964E-11 | 0.006612205 | 0.025936185 | 0.003063529 | -0.145921242 | -0.019345269 | MOCS3, DPM1            |
| chr11 | 66529657  | 66530027  | 371  | * | 4  | 3.45212E-08 | 0.001074288 | 0.025983372 | 0.003218783 | -0.099610886 | -0.046881416 | C11orf80, RP11-658F2.3 |
| chr11 | 19733794  | 19735276  | 1483 | * | 13 | 2.30894E-20 | 0.000136271 | 0.025989595 | 6.03437E-05 | 0.021978649  | 0.008669499  | NAV2, RP11-359E10.1    |
| chr20 | 32582025  | 32582236  | 212  | * | 3  | 3.54886E-08 | 0.005732714 | 0.025991308 | 0.009532014 | 0.025196232  | 0.01467015   | RALY, RP5-1125A11.1    |
| chr11 | 1357820   | 1358151   | 332  | * | 2  | 6.3404E-08  | 0.005815053 | 0.025997722 | 0.009453072 | 0.030258421  | 0.006992906  |                        |
| chr19 | 47951302  | 47951619  | 318  | * | 4  | 1.13446E-08 | 0.004115318 | 0.026005852 | 0.00419381  | -0.120286442 | -0.011192606 | SLC8A2                 |
| chr1  | 43290363  | 43291390  | 1028 | * | 7  | 7.4867E-13  | 0.009585679 | 0.026028667 | 0.002133259 | 0.196261236  | 0.092347488  | ERMAP                  |
| chr17 | 1552970   | 1553661   | 692  | * | 8  | 6.19158E-11 | 0.01647134  | 0.026048752 | 0.004930582 | 0.147271929  | 0.033369898  | RILP                   |
| chr4  | 15004942  | 15006499  | 1558 | * | 11 | 6.72036E-13 | 0.001002969 | 0.026091365 | 0.001530856 | -0.152368126 | -0.021806807 | CPEB2                  |
| chr3  | 194096808 | 194097221 | 414  | * | 4  | 2.29517E-09 | 0.001469532 | 0.026116698 | 0.001939559 | 0.110753615  | 0.077450505  |                        |
| chr7  | 155436277 | 155437243 | 967  | * | 13 | 6.0388E-11  | 0.046246106 | 0.026133023 | 0.028070026 | 0.058985099  | 0.004205692  | RBM33, AC009403.2      |
| chr3  | 158519176 | 158520176 | 1001 | * | 13 | 6.54635E-10 | 0.20976489  | 0.026160311 | 0.098001824 | -0.035869307 | 0.00407991   | MFSD1, RP11-379F4.9    |
| chr9  | 102582694 | 102584806 | 2113 | * | 10 | 5.41174E-11 | 0.000318449 | 0.026182821 | 0.000454074 | -0.048746821 | -0.007561901 | NR4A3                  |
| chr1  | 214158727 | 214159589 | 863  | * | 5  | 1.14932E-09 | 0.003100942 | 0.026229598 | 0.00546698  | 0.076028857  | 0.033361856  | PROX1, PROX1-AS1       |
| chr1  | 16532990  | 16533537  | 548  | * | 5  | 1.00652E-09 | 0.043167065 | 0.026316727 | 0.016927739 | -0.066420979 | -0.019417436 | ARHGEF19               |
| chr6  | 41130718  | 41131213  | 496  | * | 5  | 2.31641E-10 | 0.01729451  | 0.026333554 | 0.005329513 | -0.137877778 | -0.069828212 | TREM2                  |
| chr12 | 58013915  | 58013942  | 28   | * | 2  | 1.48271E-07 | 0.291499807 | 0.026349697 | 0.066669227 | 0.04374804   | 0.017456535  | SLC26A10               |
| chr11 | 34127281  | 34127291  | 11   | * | 2  | 1.82346E-07 | 0.00389289  | 0.026386832 | 0.006949602 | 0.016036716  | 0.011750606  | NAT10                  |
| chr19 | 10676186  | 10678015  | 1830 | * | 12 | 3.29593E-17 | 4.82922E-07 | 0.026423866 | 3.20657E-06 | 0.15434004   | 0.025432529  | KRI1, CDKN2D           |
| chr18 | 13640835  | 13641894  | 1060 | * | 7  | 2.40607E-09 | 0.000627983 | 0.02643025  | 0.001047787 | 0.133346478  | -0.037553808 | LDLRAD4                |
| chr10 | 99257608  | 99258985  | 1378 | * | 15 | 2.29374E-13 | 0.03588119  | 0.02643963  | 0.009900792 | -0.09509433  | -0.014308574 | UBTD1, MMS19           |
| chr7  | 4814154   | 4814294   | 141  | * | 2  | 6.8274E-08  | 0.003475041 | 0.026491254 | 0.006352788 | 0.100030271  | 0.085075363  |                        |
| chr4  | 3742095   | 3742357   | 263  | * | 4  | 7.95197E-09 | 0.003381422 | 0.02649858  | 0.005131226 | 0.118237674  | 0.079620172  |                        |
| chr1  | 154151169 | 154151980 | 812  | * | 5  | 4.4076E-12  | 4.44421E-05 | 0.026499929 | 0.000274348 | 0.175602388  | 0.108332701  | TPM3                   |
| chr14 | 75594752  | 75594775  | 24   | * | 2  | 1.12235E-08 | 0.003165294 | 0.026579822 | 0.005895936 | -0.149547688 | -0.137331786 | RP11-950C14.7          |
| chr9  | 130497263 | 130498316 | 1054 | * | 10 | 3.10865E-16 | 0.001311709 | 0.026579907 | 0.00030808  | 0.083127455  | -0.004861212 | TOR2A                  |
| chr12 | 67663678  | 67664046  | 369  | * | 3  | 2.73165E-08 | 0.028240596 | 0.026583321 | 0.030331424 | -0.033996174 | -0.009573122 | CAND1                  |
| chr10 | 103875961 | 103875969 | 9    | * | 2  | 1.87541E-07 | 0.003357883 | 0.026604592 | 0.006186325 | -0.108421935 | -0.102602947 | LDB1                   |

|       |           |           |      |   |    |             |             |             |             |              |              |                                 |
|-------|-----------|-----------|------|---|----|-------------|-------------|-------------|-------------|--------------|--------------|---------------------------------|
| chr3  | 52864659  | 52864907  | 249  | * | 4  | 4.08144E-08 | 0.0288209   | 0.026608114 | 0.01096122  | 0.143523245  | 0.075474477  | ITIH4, RP5-966M1.6              |
| chr19 | 34111524  | 34112991  | 1468 | * | 12 | 4.88744E-16 | 0.00744559  | 0.026635552 | 0.001336122 | 0.146635098  | 0.063958491  | CHST8                           |
| chr19 | 52097276  | 52097905  | 630  | * | 7  | 1.38151E-11 | 0.001907438 | 0.026653885 | 0.001682886 | -0.042801083 | 0.002349043  | AC018755.16, AC018755.1         |
| chr14 | 97058964  | 97059467  | 504  | * | 6  | 2.695E-10   | 0.001662251 | 0.02665729  | 0.002513379 | 0.120722833  | 0.037543154  | RP11-433J8.1                    |
| chr6  | 135375451 | 135375929 | 479  | * | 4  | 3.40745E-09 | 0.036699392 | 0.026662202 | 0.015252544 | -0.047525343 | -0.000265593 | HBS1L                           |
| chr12 | 51631858  | 51633050  | 1193 | * | 21 | 1.15442E-24 | 2.02681E-05 | 0.026691133 | 2.60128E-05 | -0.068410501 | -0.007136493 | DAZAP2                          |
| chr4  | 111532679 | 111533547 | 869  | * | 7  | 9.31766E-12 | 0.000885733 | 0.026698711 | 0.002371832 | 0.077380735  | 0.056366299  | RP11-380D23.2                   |
| chr19 | 10444429  | 10444917  | 489  | * | 6  | 2.10696E-10 | 0.020243886 | 0.026732765 | 0.002716791 | 0.110134173  | 0.032668249  | ICAM3                           |
| chr14 | 78227161  | 78227346  | 186  | * | 4  | 1.50347E-07 | 0.077163853 | 0.026749948 | 0.042427153 | 0.02781697   | 0.009219741  | SLIRP, C14orf178, SNW1          |
| chr14 | 95786621  | 95786663  | 43   | * | 2  | 5.84708E-08 | 0.011369034 | 0.026752323 | 0.015551433 | 0.114615519  | 0.076488465  |                                 |
| chr12 | 118572829 | 118573745 | 917  | * | 8  | 4.45261E-09 | 0.088739881 | 0.026755188 | 0.006186586 | -0.034820674 | -0.006535146 | PEBP1, VSIG10                   |
| chr12 | 51784414  | 51784989  | 576  | * | 9  | 5.84887E-11 | 0.223487041 | 0.026757529 | 0.041632941 | -0.127722732 | -0.019655773 | GALNT6                          |
| chr3  | 48470799  | 48471995  | 1197 | * | 11 | 6.93936E-14 | 0.000766229 | 0.026783044 | 0.000802401 | -0.133489099 | -0.034547589 | PLXNB1                          |
| chr17 | 78851149  | 78851503  | 355  | * | 4  | 5.2164E-09  | 0.000419135 | 0.026791554 | 0.001509352 | 0.150339818  | 0.092397755  | RPTOR                           |
| chr20 | 18447291  | 18448030  | 740  | * | 9  | 4.38796E-09 | 0.072737085 | 0.026793694 | 0.022729813 | 0.034071663  | 0.007959377  | POLR3F, DZANK1                  |
| chr10 | 49892433  | 49893549  | 1117 | * | 16 | 3.1069E-20  | 0.000103026 | 0.02680823  | 7.76706E-05 | -0.124729914 | -0.042867935 | WDFY4                           |
| chr11 | 44960854  | 44961359  | 506  | * | 3  | 4.29467E-08 | 0.000843736 | 0.02685169  | 0.002365349 | -0.144496141 | -0.108535105 | TP53I11                         |
| chr11 | 48037488  | 48037919  | 432  | * | 3  | 1.25859E-07 | 0.00106239  | 0.026879542 | 0.0027222   | -0.101193307 | -0.038657568 | PTPRJ                           |
| chr1  | 36042986  | 36043401  | 416  | * | 6  | 1.44644E-08 | 0.00804081  | 0.026904082 | 0.010054114 | 0.038472995  | 0.018251087  | TFAP2E, RP4-728D4.2             |
| chr14 | 59729610  | 59730159  | 550  | * | 7  | 2.44033E-14 | 1.69701E-05 | 0.026930801 | 6.40829E-05 | 0.162363401  | 0.090528678  | DAAM1                           |
| chr6  | 31673800  | 31674897  | 1098 | * | 7  | 5.70237E-13 | 8.29462E-06 | 0.026933967 | 8.40557E-05 | 0.167826615  | 0.083557341  | LY6G6F, MEGT1, XXbac-BPG32J3.20 |
| chr17 | 7475958   | 7476167   | 210  | * | 6  | 3.97553E-08 | 0.355965192 | 0.026972157 | 0.045820865 | 0.020958082  | 0.010579426  | SEN3-EIF4A1, EIF4A1, SNORA67    |
| chr6  | 10383084  | 10385320  | 2237 | * | 14 | 3.96361E-11 | 0.000529104 | 0.026974134 | 0.000454631 | -0.138658223 | 0.01910061   |                                 |
| chr19 | 18718675  | 18719091  | 417  | * | 4  | 3.91799E-10 | 0.003928351 | 0.026982487 | 0.005110111 | 0.070834864  | 0.037055366  | TMEM59L                         |
| chr8  | 57905925  | 57906543  | 619  | * | 4  | 2.80308E-10 | 0.041881918 | 0.027037762 | 0.015044988 | -0.053473326 | 0.000186642  | IMPAD1                          |
| chr19 | 5719823   | 5720952   | 1130 | * | 17 | 9.38322E-12 | 0.246807537 | 0.027045906 | 0.047438961 | 0.066750044  | 0.008337256  | CATSPERD, LONP1                 |
| chr14 | 21270407  | 21271485  | 1079 | * | 12 | 1.72259E-11 | 0.189250212 | 0.027053383 | 0.021343035 | 0.18466949   | 0.053650053  | RNASE1                          |
| chr1  | 11322191  | 11322899  | 709  | * | 10 | 1.80936E-10 | 0.076099904 | 0.027062267 | 0.017915101 | -0.050254996 | -0.002220128 | MTOR                            |
| chr19 | 45656942  | 45657270  | 329  | * | 4  | 2.08714E-09 | 0.000871439 | 0.027082516 | 0.002541954 | -0.068964466 | -0.014405124 | MARK4, NKPD1                    |

|       |           |           |      |   |    |             |             |             |             |              |              |                      |
|-------|-----------|-----------|------|---|----|-------------|-------------|-------------|-------------|--------------|--------------|----------------------|
| chr12 | 6716081   | 6716597   | 517  | * | 5  | 1.32131E-11 | 0.001014193 | 0.027087279 | 0.001567779 | -0.119701413 | -0.07213495  | CHD4                 |
| chr6  | 42531521  | 42531902  | 382  | * | 11 | 1.17917E-10 | 0.145853949 | 0.027090396 | 0.024043222 | -0.053401725 | -0.017253136 | UBR2                 |
| chr3  | 142682652 | 142683329 | 678  | * | 10 | 4.02166E-09 | 0.15619808  | 0.027092902 | 0.047793465 | 0.101950265  | 0.021397613  | RP11-372E1.6         |
| chr13 | 28554471  | 28555387  | 917  | * | 4  | 2.52848E-09 | 0.0002075   | 0.02714918  | 0.00086891  | 0.195592085  | 0.125408927  | URAD                 |
| chr19 | 33166019  | 33166844  | 826  | * | 11 | 1.30809E-09 | 0.035702713 | 0.027158467 | 0.017231124 | 0.074668226  | 0.015543416  | RGS9BP, ANKRD27      |
| chr5  | 152871549 | 152871803 | 255  | * | 6  | 4.50429E-08 | 0.179622513 | 0.027167694 | 0.026430716 | -0.166513854 | -0.05384692  | GRIA1                |
| chr1  | 92012408  | 92012736  | 329  | * | 3  | 5.52084E-10 | 0.000449566 | 0.027177342 | 0.001460536 | -0.150259018 | -0.078909002 |                      |
| chr4  | 778827    | 779173    | 347  | * | 3  | 3.02382E-08 | 0.000893637 | 0.027200203 | 0.002454186 | 0.202496084  | 0.140590211  | CPLX1                |
| chr1  | 153746588 | 153748120 | 1533 | * | 14 | 3.76382E-15 | 0.000217358 | 0.027240965 | 0.000734269 | 0.096637054  | 0.029592912  | SLC27A3              |
| chr2  | 67624207  | 67624930  | 724  | * | 10 | 2.96596E-10 | 0.099076912 | 0.027278686 | 0.021702477 | -0.025895903 | -0.000399832 | ETAA1                |
| chr6  | 142622429 | 142623767 | 1339 | * | 12 | 1.52816E-16 | 0.000320996 | 0.027281712 | 0.000195622 | -0.097632659 | -0.019315215 | GPR126               |
| chr1  | 1262717   | 1263239   | 523  | * | 4  | 3.19874E-09 | 0.00052005  | 0.027289019 | 0.001867783 | 0.092263008  | -0.010339739 | GLTPD1               |
| chr1  | 20959826  | 20960434  | 609  | * | 9  | 2.18325E-08 | 0.186192721 | 0.027314326 | 0.068640596 | 0.036260705  | 0.008067724  | PINK1                |
| chr21 | 34497409  | 34497493  | 85   | * | 3  | 4.88394E-08 | 0.000512924 | 0.027381579 | 0.001627839 | -0.139965042 | -0.106872095 |                      |
| chr6  | 33239127  | 33240471  | 1345 | * | 35 | 5.84094E-10 | 0.829085204 | 0.027422023 | 0.527998057 | 0.043537417  | 0.002710963  | RPS18, VPS52         |
| chr10 | 111767584 | 111768423 | 840  | * | 7  | 1.14287E-10 | 0.000917392 | 0.027439337 | 0.002025083 | -0.06338921  | -0.036712514 | ADD3                 |
| chr16 | 89033692  | 89034292  | 601  | * | 5  | 5.43875E-10 | 0.001713834 | 0.027464989 | 0.003298485 | -0.185718403 | -0.118945603 | CBFA2T3              |
| chr19 | 41769376  | 41770635  | 1260 | * | 12 | 4.30656E-11 | 0.363697852 | 0.027468754 | 0.044142346 | 0.026357501  | 0.006082394  | HNRNPUL1             |
| chr12 | 94853345  | 94854469  | 1125 | * | 14 | 5.51745E-11 | 0.19924451  | 0.027511734 | 0.022735863 | -0.069217992 | -0.012332839 | CCDC41               |
| chr17 | 79790705  | 79791653  | 949  | * | 12 | 1.44672E-13 | 0.006604318 | 0.027512761 | 0.002348383 | 0.061496615  | 0.014770332  | FAM195B, PPP1R27     |
| chr9  | 34956991  | 34957576  | 586  | * | 5  | 2.55543E-09 | 0.00253754  | 0.027515616 | 0.006191649 | -0.182980563 | -0.070368519 | KIAA1045             |
| chr7  | 1545522   | 1546068   | 547  | * | 5  | 2.12084E-12 | 1.99179E-05 | 0.027524047 | 0.000158245 | -0.147182026 | -0.108789926 |                      |
| chr6  | 44280781  | 44280859  | 79   | * | 2  | 1.17612E-07 | 0.003765732 | 0.027595521 | 0.00684889  | -0.098787469 | -0.036361992 | RP11-444E17.6, AARS2 |
| chr20 | 35374068  | 35374156  | 89   | * | 2  | 3.40239E-08 | 0.032590741 | 0.027622676 | 0.030685226 | 0.047375153  | 0.030957606  | NDRG3                |
| chr8  | 54935605  | 54936189  | 585  | * | 4  | 1.68058E-08 | 0.069664992 | 0.027681661 | 0.022409671 | -0.106134301 | -0.029746652 |                      |
| chr19 | 39368345  | 39369067  | 723  | * | 4  | 9.96483E-11 | 0.351770704 | 0.027698019 | 0.027544883 | 0.074779286  | 0.035944289  | RINL                 |
| chr11 | 88070661  | 88071409  | 749  | * | 10 | 3.57392E-09 | 0.175310441 | 0.027706418 | 0.043584543 | 0.017974784  | 0.004445079  | CTSC                 |
| chr15 | 63340085  | 63342033  | 1949 | * | 20 | 2.64074E-16 | 0.00024198  | 0.02771229  | 0.000253756 | 0.062111259  | 0.007151545  | TPM1, RP11-244F12.3  |
| chr7  | 37389785  | 37390106  | 322  | * | 3  | 6.89237E-08 | 0.000605448 | 0.027745972 | 0.001866719 | -0.081570921 | -0.0571999   | ELMO1                |

|       |           |           |      |   |    |             |             |             |             |              |              |                           |
|-------|-----------|-----------|------|---|----|-------------|-------------|-------------|-------------|--------------|--------------|---------------------------|
| chr16 | 30365840  | 30367279  | 1440 | * | 17 | 2.78161E-13 | 0.30828235  | 0.027801469 | 0.032608684 | -0.055435776 | -0.001891281 | RP11-347C12.10, CD2BP2    |
| chr6  | 36515007  | 36515856  | 850  | * | 8  | 1.39808E-09 | 0.423645517 | 0.027804119 | 0.031577122 | -0.128742538 | -0.035671098 | STK38                     |
| chr11 | 65625153  | 65628378  | 3226 | * | 28 | 1.5923E-17  | 0.001229287 | 0.027806984 | 0.000674399 | -0.080235607 | -0.004781444 | MUS81, CFL1               |
| chr17 | 1928740   | 1929555   | 816  | * | 5  | 4.81465E-10 | 0.000366747 | 0.027810091 | 0.001295984 | -0.030785447 | 0.015164166  |                           |
| chr7  | 150548765 | 150549472 | 708  | * | 8  | 4.67363E-11 | 0.001572761 | 0.027861317 | 0.002354041 | -0.152836768 | -0.062608378 | AOC1                      |
| chr17 | 3847872   | 3848324   | 453  | * | 4  | 1.02568E-08 | 0.013716723 | 0.027865739 | 0.005497534 | 0.121219964  | 0.083482628  | ATP2A3                    |
| chr7  | 93519855  | 93520566  | 712  | * | 16 | 2.67031E-10 | 0.034916495 | 0.027885975 | 0.050121674 | -0.09321751  | -0.016024895 | GNGT1, AC002076.10, TFPI2 |
| chr13 | 113951295 | 113951297 | 3    | * | 2  | 1.37549E-07 | 0.00365967  | 0.027905983 | 0.006712843 | -0.045946156 | -0.0372839   |                           |
| chr1  | 110161760 | 110163645 | 1886 | * | 23 | 7.72377E-17 | 0.009985234 | 0.027915819 | 0.002252364 | 0.041890554  | 0.002861892  | AMPD2                     |
| chr2  | 8723906   | 8724060   | 155  | * | 4  | 4.62978E-08 | 0.007200503 | 0.028032982 | 0.008046899 | -0.077916033 | -0.043278537 | AC011747.4                |
| chr12 | 132862024 | 132862110 | 87   | * | 4  | 1.37402E-07 | 0.003059607 | 0.028060999 | 0.005889419 | 0.146577936  | 0.084299305  | GALNT9                    |
| chr10 | 102989551 | 102990026 | 476  | * | 4  | 2.67198E-08 | 0.018653734 | 0.02806453  | 0.016610384 | 0.031171379  | 0.020154322  | LBX1-AS1, LBX1            |
| chr10 | 27149349  | 27150662  | 1314 | * | 15 | 3.82769E-11 | 0.008806719 | 0.028084195 | 0.005078255 | -0.191238904 | -0.02060891  | ABI1                      |
| chr4  | 100815442 | 100815781 | 340  | * | 6  | 4.22851E-09 | 0.005032293 | 0.028128883 | 0.00552126  | -0.037247473 | 0.003773447  | LAMTOR3                   |
| chr8  | 140715018 | 140715802 | 785  | * | 7  | 5.63839E-10 | 0.054093552 | 0.028136015 | 0.011674984 | 0.039039123  | 0.011250606  | KCNK9                     |
| chr7  | 123264700 | 123265073 | 374  | * | 6  | 4.38411E-11 | 0.003386814 | 0.028140748 | 0.002249568 | 0.182133369  | 0.097948515  | ASB15, RP11-390E23.3      |
| chr6  | 133036545 | 133036651 | 107  | * | 3  | 2.14604E-08 | 0.000755119 | 0.028156997 | 0.002212063 | 0.069134804  | 0.055726557  |                           |
| chr6  | 43214396  | 43214850  | 455  | * | 4  | 6.41791E-09 | 0.01924935  | 0.028191213 | 0.003319354 | 0.15089695   | 0.086658614  | TTBK1                     |
| chr2  | 97425517  | 97426274  | 758  | * | 4  | 7.77991E-11 | 0.025833369 | 0.028196233 | 0.019039029 | 0.136881904  | 0.052506696  |                           |
| chr9  | 124132714 | 124133556 | 843  | * | 9  | 1.42406E-12 | 0.067110241 | 0.028200205 | 0.047509101 | 0.119089269  | 0.035003815  |                           |
| chr1  | 2460621   | 2461929   | 1309 | * | 13 | 2.76257E-16 | 0.000260335 | 0.028256553 | 0.000509724 | -0.063376493 | 0.013184094  | HES5                      |
| chr5  | 137667509 | 137668198 | 690  | * | 12 | 2.43452E-08 | 0.117557903 | 0.028341079 | 0.073760028 | 0.059269589  | 0.00759963   | FAM53C, CDC25C            |
| chr20 | 2853149   | 2853464   | 316  | * | 3  | 1.20657E-08 | 0.072976538 | 0.028346187 | 0.051455769 | 0.015966533  | 0.008308996  | PTPRA                     |
| chr19 | 55770481  | 55771041  | 561  | * | 7  | 2.88379E-09 | 0.044960951 | 0.028364589 | 0.034414786 | -0.083932255 | -0.014079001 |                           |
| chr11 | 107728952 | 107730039 | 1088 | * | 11 | 3.18251E-14 | 0.010041498 | 0.028367494 | 0.00192875  | -0.034818073 | -0.004080824 | SLC35F2                   |
| chr16 | 28874307  | 28875484  | 1178 | * | 15 | 2.85559E-12 | 0.092811825 | 0.02836986  | 0.048244609 | -0.076095759 | -0.008018017 | SH2B1, RP11-22P6.2        |
| chr9  | 71161608  | 71162063  | 456  | * | 3  | 1.12792E-07 | 0.000699673 | 0.028371759 | 0.00208675  | -0.134221724 | -0.083904358 | RP11-274B18.4             |
| chr5  | 133984553 | 133984612 | 60   | * | 2  | 9.17521E-08 | 0.137727184 | 0.028373188 | 0.059241088 | 0.023090407  | 0.009904223  | SEC24A, SAR1B             |
| chr4  | 926135    | 926530    | 396  | * | 12 | 2.0469E-08  | 0.134166834 | 0.028404789 | 0.082370357 | 0.02935261   | 0.002037032  | TMEM175, GAK              |

|       |           |           |      |   |    |             |             |             |             |              |              |                                          |
|-------|-----------|-----------|------|---|----|-------------|-------------|-------------|-------------|--------------|--------------|------------------------------------------|
| chr1  | 22140859  | 22141014  | 156  | * | 2  | 1.63627E-07 | 0.005321983 | 0.028431576 | 0.009074875 | 0.011577407  | 0.010269664  | LDLRAD2                                  |
| chr22 | 47158239  | 47159009  | 771  | * | 11 | 2.15768E-08 | 0.213489895 | 0.028488239 | 0.168566681 | 0.049167313  | 0.003752718  | TBC1D22A, CTA-29F11.1                    |
| chr18 | 46987786  | 46988046  | 261  | * | 2  | 1.6347E-07  | 0.004718477 | 0.028490674 | 0.008264832 | -0.08386339  | -0.077703965 |                                          |
| chr9  | 116326448 | 116327278 | 831  | * | 8  | 4.64671E-14 | 1.37492E-05 | 0.028503425 | 0.000100796 | -0.182529135 | -0.09796667  | RGS3                                     |
| chr2  | 113341214 | 113342738 | 1525 | * | 16 | 2.17474E-13 | 0.057078247 | 0.028512926 | 0.015841925 | 0.084038449  | 0.013123548  | CHCHD5                                   |
| chr17 | 10600667  | 10601181  | 515  | * | 12 | 1.0111E-10  | 0.041014201 | 0.028520363 | 0.027415453 | 0.030242301  | 0.007790109  | ADPRM, SCO1                              |
| chr4  | 15779364  | 15781661  | 2298 | * | 15 | 2.12833E-09 | 0.040793835 | 0.028535865 | 0.007236796 | -0.160906061 | -0.02505567  | CD38                                     |
| chr15 | 72522949  | 72524237  | 1289 | * | 14 | 3.60722E-16 | 0.001275017 | 0.028552059 | 0.000921238 | 0.032680106  | 0.010572548  | PKM                                      |
| chr16 | 89386798  | 89388396  | 1599 | * | 15 | 9.8638E-12  | 0.009192503 | 0.028594425 | 0.002011448 | 0.141857938  | 0.055340247  | AC137932.6, ANKRD11                      |
| chr18 | 29673246  | 29673278  | 33   | * | 2  | 1.15165E-08 | 0.003594701 | 0.028643924 | 0.006660653 | -0.023759217 | -0.00350605  | RP11-53I6.2, RNF138                      |
| chr7  | 65541029  | 65541747  | 719  | * | 3  | 4.03632E-08 | 0.016633126 | 0.028653687 | 0.019541389 | -0.045143492 | -0.017508918 | ASL                                      |
| chr20 | 18567851  | 18569196  | 1346 | * | 15 | 3.71551E-17 | 0.01432485  | 0.028686906 | 0.001914737 | -0.110545241 | -0.013282521 | DTD1                                     |
| chr8  | 17940941  | 17941088  | 148  | * | 3  | 1.70764E-08 | 0.029117367 | 0.028719472 | 0.012733597 | -0.025608705 | 0.000779571  | ASAH1                                    |
| chr19 | 45504242  | 45505298  | 1057 | * | 9  | 2.38932E-13 | 0.002478051 | 0.028758458 | 0.001113463 | 0.060077116  | 0.010842161  | RELB                                     |
| chr20 | 1447723   | 1447874   | 152  | * | 3  | 1.03447E-08 | 0.197730029 | 0.028771233 | 0.01827972  | -0.040458749 | -0.023089923 | NSFL1C                                   |
| chr10 | 102996254 | 102998762 | 2509 | * | 18 | 5.90981E-14 | 5.52335E-05 | 0.028848863 | 0.000100124 | 0.110700162  | 0.035791403  | LBX1-AS1                                 |
| chr3  | 167967220 | 167967462 | 243  | * | 3  | 4.86151E-08 | 0.021868792 | 0.028849188 | 0.013570117 | -0.194055896 | -0.052141268 | EGFEM1P                                  |
| chr3  | 48646722  | 48647426  | 705  | * | 11 | 7.83113E-11 | 0.059885307 | 0.028858579 | 0.014790961 | 0.107189641  | 0.025142212  | UQCRC1                                   |
| chr6  | 164006905 | 164007415 | 511  | * | 4  | 1.43693E-08 | 0.000594053 | 0.028892632 | 0.001843591 | 0.124780744  | 0.096496883  |                                          |
| chr10 | 96990543  | 96991505  | 963  | * | 8  | 1.10543E-13 | 0.000293168 | 0.028923493 | 0.000655185 | -0.184470088 | -0.065823621 | RP11-310E22.4                            |
| chr19 | 36393344  | 36393696  | 353  | * | 3  | 2.13455E-08 | 0.016864176 | 0.0289531   | 0.012177394 | -0.104881091 | -0.04500502  | HCST                                     |
| chr19 | 42788848  | 42788966  | 119  | * | 2  | 1.36131E-07 | 0.012830196 | 0.028963641 | 0.017438315 | -0.026982847 | -0.01051647  | CIC                                      |
| chr1  | 204403606 | 204403697 | 92   | * | 3  | 5.29579E-08 | 0.000564309 | 0.029003607 | 0.001787619 | 0.120820385  | 0.051748017  | RP11-739N20.2, PIK3C2B                   |
| chr18 | 47017829  | 47018647  | 819  | * | 7  | 4.59919E-10 | 0.499271175 | 0.029048392 | 0.115045625 | 0.056733128  | 0.017459937  | MIR1539, RPL17-C18orf32, RPL17, SNORD58B |
| chr12 | 92538613  | 92539873  | 1261 | * | 13 | 9.04942E-16 | 0.009440776 | 0.029055784 | 0.002821405 | 0.035570099  | 0.009202504  | RP11-796E2.4, BTG1                       |
| chr11 | 64879330  | 64880626  | 1297 | * | 10 | 1.4133E-16  | 0.012726405 | 0.029061625 | 0.002956718 | -0.033907124 | 0.00460419   | VPS51, TM7SF2                            |
| chr6  | 32077744  | 32078624  | 881  | * | 11 | 9.20505E-14 | 0.008682195 | 0.029104841 | 0.005713393 | 0.125927735  | 0.055617096  | TNXB, ATF6B                              |
| chr12 | 8234613   | 8235314   | 702  | * | 10 | 3.17409E-09 | 0.032344317 | 0.029109948 | 0.044071132 | 0.044570344  | -0.003603403 | NECAP1                                   |
| chr5  | 174870544 | 174871289 | 746  | * | 4  | 2.72827E-09 | 0.018451488 | 0.029138927 | 0.022895341 | 0.068430376  | 0.048111641  | DRD1                                     |

|       |           |           |      |   |    |             |             |             |             |              |              |                                             |
|-------|-----------|-----------|------|---|----|-------------|-------------|-------------|-------------|--------------|--------------|---------------------------------------------|
| chr8  | 145024637 | 145025610 | 974  | * | 8  | 1.32768E-11 | 0.000790002 | 0.029145144 | 0.002256764 | 0.127434789  | 0.00286263   | PLEC                                        |
| chr1  | 65533358  | 65533502  | 145  | * | 4  | 1.43545E-07 | 0.012808468 | 0.029152155 | 0.01243743  | -0.041130423 | 0.005977667  | RP4-535B20.1                                |
| chr11 | 134093731 | 134095386 | 1656 | * | 19 | 7.8755E-22  | 0.000141544 | 0.02916146  | 8.0989E-05  | 0.031018107  | 0.006248595  | VPS26B, NCAPD3                              |
| chr16 | 68771763  | 68772469  | 707  | * | 5  | 6.33948E-09 | 0.014489904 | 0.029169065 | 0.020017761 | 0.160981665  | 0.05361746   | CDH1                                        |
| chr16 | 67926962  | 67927632  | 671  | * | 6  | 1.53381E-08 | 0.012337221 | 0.029176781 | 0.010753463 | -0.054215843 | -0.009559438 | PSKH1                                       |
| chr6  | 43596764  | 43597312  | 549  | * | 11 | 7.51481E-10 | 0.190181045 | 0.029257757 | 0.057810439 | -0.078745813 | -0.002451718 | MAD2L1BP, GTPBP2                            |
| chr20 | 57594082  | 57594545  | 464  | * | 6  | 4.95088E-10 | 0.030720168 | 0.029260073 | 0.004732097 | 0.14839191   | 0.062266091  | TUBB1                                       |
| chr15 | 68871574  | 68871866  | 293  | * | 3  | 5.84285E-08 | 0.006348138 | 0.029284891 | 0.011294012 | 0.024045724  | 0.009000206  | CORO2B                                      |
| chr7  | 44162801  | 44163975  | 1175 | * | 13 | 1.30887E-14 | 0.01285423  | 0.029285466 | 0.002621671 | 0.064656971  | 0.004428861  | POLD2                                       |
| chr2  | 220196530 | 220196755 | 226  | * | 3  | 7.13605E-08 | 0.002621578 | 0.029306375 | 0.005714663 | 0.128041193  | 0.079052426  | RESP18                                      |
| chr16 | 81039227  | 81041398  | 2172 | * | 25 | 1.58381E-11 | 0.044432421 | 0.029352859 | 0.007449284 | 0.150185044  | 0.006874818  | CENPN, CMC2                                 |
| chr20 | 44717989  | 44718168  | 180  | * | 2  | 5.12733E-08 | 0.013261166 | 0.029445631 | 0.017955436 | 0.020630391  | 0.014718865  | NCOA5                                       |
| chr2  | 53994269  | 53995338  | 1070 | * | 11 | 7.41608E-11 | 0.036299104 | 0.029482497 | 0.01531844  | -0.14883556  | -0.020960071 | CHAC2, GPR75-ASB3, ASB3                     |
| chr7  | 20370159  | 20370742  | 584  | * | 6  | 1.50284E-08 | 0.060401229 | 0.029487002 | 0.028050036 | 0.021423141  | 0.009165374  | ITGB8, CTA-293F17.1                         |
| chr11 | 2398327   | 2399360   | 1034 | * | 18 | 8.86312E-14 | 0.140213447 | 0.029555623 | 0.04931261  | 0.039974257  | 0.005487801  | CD81, CD81-AS1                              |
| chr16 | 66585425  | 66586745  | 1321 | * | 15 | 2.55429E-14 | 0.006178289 | 0.029566437 | 0.002059529 | 0.127151719  | 0.009452822  | CKLF, CKLF-CMTM1, TK2                       |
| chr2  | 86830411  | 86830855  | 445  | * | 2  | 3.46767E-08 | 0.213749609 | 0.029590048 | 0.068729826 | 0.085216221  | 0.039415333  | AC015971.2, CHMP3, RNF103-<br>CHMP3, RNF103 |
| chr1  | 151371944 | 151372652 | 709  | * | 9  | 9.57523E-12 | 0.000488318 | 0.029631087 | 0.001827901 | 0.04883126   | 0.001827259  | PSMB4                                       |
| chr2  | 317257    | 317938    | 682  | * | 7  | 1.61175E-10 | 0.04456825  | 0.029643533 | 0.0033267   | 0.135065075  | 0.042626888  | AC079779.6                                  |
| chr12 | 122241139 | 122242756 | 1618 | * | 15 | 4.96859E-16 | 0.04493657  | 0.029647697 | 0.008321371 | -0.065415548 | -0.014590717 | SETD1B, RHOF, AC084018.1                    |
| chr3  | 16554619  | 16555789  | 1171 | * | 12 | 2.84431E-09 | 0.082225806 | 0.029648165 | 0.039258553 | -0.056815034 | -0.014207286 | RFTN1                                       |
| chr17 | 782910    | 783451    | 542  | * | 4  | 2.18012E-08 | 0.001495321 | 0.029707167 | 0.003208943 | 0.200258628  | 0.119269216  | RP11-676J12.6, NXN                          |
| chr4  | 177116464 | 177116771 | 308  | * | 5  | 5.03714E-09 | 0.168225766 | 0.029723166 | 0.054368039 | 0.036884021  | 0.008433657  | SPATA4                                      |
| chr9  | 115141761 | 115141763 | 3    | * | 2  | 1.45024E-07 | 0.013256024 | 0.029729376 | 0.018018152 | -0.023347863 | -0.018187105 |                                             |
| chr21 | 47648535  | 47649127  | 593  | * | 11 | 3.94459E-10 | 0.028949508 | 0.029730836 | 0.035100897 | -0.051683671 | -0.018960583 | LSS                                         |
| chr1  | 23670246  | 23671499  | 1254 | * | 13 | 2.64692E-13 | 0.011352302 | 0.029769666 | 0.004488316 | -0.037025917 | -0.001204655 | HNRNPR                                      |
| chr8  | 96036568  | 96037660  | 1093 | * | 11 | 2.00577E-12 | 0.007386078 | 0.029784068 | 0.000824315 | -0.132502646 | -0.013578141 | NDUFAF6                                     |
| chr19 | 18284045  | 18284600  | 556  | * | 11 | 2.37932E-09 | 0.621681597 | 0.029824805 | 0.058952999 | -0.09094283  | -0.015848756 | PIK3R2, IFI30                               |
| chr1  | 228699886 | 228700583 | 698  | * | 8  | 7.00245E-10 | 0.089008246 | 0.029859246 | 0.012166234 | 0.109415689  | 0.039603362  | BTNL10                                      |

|       |           |           |      |   |    |             |             |             |             |              |              |                               |
|-------|-----------|-----------|------|---|----|-------------|-------------|-------------|-------------|--------------|--------------|-------------------------------|
| chr6  | 31587680  | 31590870  | 3191 | * | 41 | 3.7927E-20  | 0.000148877 | 0.029904947 | 6.09635E-05 | -0.208884453 | -0.022193947 | PRRC2A, SNORA38               |
| chr1  | 7122541   | 7122970   | 430  | * | 5  | 2.03397E-08 | 0.014685419 | 0.02994041  | 0.007751938 | 0.170939144  | -0.013431449 | CAMTA1                        |
| chr9  | 2016890   | 2017576   | 687  | * | 3  | 2.55321E-11 | 0.001445789 | 0.030004538 | 0.003675755 | -0.025244188 | -0.007174637 | SMARCA2                       |
| chr2  | 176993211 | 176993841 | 631  | * | 5  | 1.73566E-09 | 0.002345995 | 0.030057391 | 0.003809404 | -0.050894727 | 0.002941854  | HOXD-AS2                      |
| chr3  | 50125982  | 50126711  | 730  | * | 13 | 5.39795E-15 | 0.012314859 | 0.03006527  | 0.001715066 | 0.110318392  | 0.015748392  | RBM6, RBM5                    |
| chr2  | 33172442  | 33172444  | 3    | * | 2  | 4.67617E-08 | 0.00441007  | 0.030077678 | 0.007950787 | 0.023452483  | 0.020551949  | LTBP1                         |
| chr13 | 113862899 | 113864409 | 1511 | * | 17 | 8.54902E-12 | 0.012817226 | 0.030086255 | 0.003111638 | -0.049121264 | -0.002113062 | CUL4A, PCID2                  |
| chr3  | 133464234 | 133465469 | 1236 | * | 14 | 8.09151E-12 | 0.149834864 | 0.030089316 | 0.013591671 | 0.111598082  | 0.024116443  | TFP1, TF                      |
| chr5  | 176734343 | 176735073 | 731  | * | 5  | 2.42894E-10 | 0.000101866 | 0.030098184 | 0.000484018 | -0.138407094 | -0.100707234 | MXD3                          |
| chr4  | 106395029 | 106395648 | 620  | * | 13 | 3.77689E-08 | 0.424785689 | 0.030108168 | 0.168605752 | -0.060033998 | -0.006079528 | PPA2                          |
| chr5  | 110847826 | 110849104 | 1279 | * | 14 | 6.97763E-13 | 0.021032382 | 0.030120088 | 0.01355137  | -0.129905652 | -0.01755894  | STARD4-AS1, STARD4            |
| chr7  | 151216931 | 151217961 | 1031 | * | 15 | 9.82851E-17 | 0.024848685 | 0.030145348 | 0.002527302 | -0.110541647 | -0.011482888 | RHEB                          |
| chr11 | 61109711  | 61110630  | 920  | * | 6  | 2.1626E-11  | 0.005498708 | 0.030201118 | 0.002517036 | -0.110861912 | -0.036439444 | DAK, DDB1                     |
| chr17 | 33390736  | 33390854  | 119  | * | 3  | 2.89809E-08 | 0.000645446 | 0.03022949  | 0.002019805 | -0.049008724 | -0.043840681 | RFFL, RAD51L3-RFFL            |
| chr7  | 26437681  | 26438304  | 624  | * | 6  | 1.65984E-08 | 0.005653269 | 0.030297901 | 0.008932189 | -0.021324419 | 0.006197424  | AC004540.5                    |
| chr1  | 171226225 | 171226702 | 478  | * | 5  | 3.81699E-09 | 0.004342629 | 0.030299085 | 0.005153272 | -0.078527312 | -0.04134736  | FMO1                          |
| chr7  | 81399308  | 81399747  | 440  | * | 6  | 6.7417E-09  | 0.004779173 | 0.030324884 | 0.006613328 | -0.166926593 | -0.062508284 | HGF                           |
| chr5  | 169816472 | 169816960 | 489  | * | 5  | 2.33974E-08 | 0.003462669 | 0.030326211 | 0.008051083 | 0.176360595  | 0.065524161  | KCNIP1, CTD-2270F17.1, KCNMB1 |
| chr17 | 40896484  | 40897182  | 699  | * | 9  | 9.91829E-11 | 0.015121872 | 0.030326663 | 0.015301934 | -0.125910269 | -0.022572112 | EZH1                          |
| chr16 | 69344779  | 69346037  | 1259 | * | 12 | 2.23835E-11 | 0.004408193 | 0.030345301 | 0.004440585 | 0.073444202  | 0.004558994  | RP11-343C2.11, VPS4A          |
| chr9  | 91924749  | 91926624  | 1876 | * | 12 | 3.69691E-11 | 0.004335139 | 0.030387473 | 0.001523581 | 0.110333979  | 0.00226255   | CKS2                          |
| chr4  | 84256364  | 84257282  | 919  | * | 8  | 2.23924E-11 | 0.099021814 | 0.030412607 | 0.032521226 | -0.147102727 | -0.049580845 |                               |
| chr6  | 27775346  | 27776524  | 1179 | * | 9  | 3.44799E-13 | 0.000643833 | 0.030417702 | 0.000640225 | -0.126430271 | -0.030229008 | HIST1H2AI, HIST1H2BL          |
| chr7  | 100240094 | 100240548 | 455  | * | 6  | 3.90359E-09 | 0.007091637 | 0.030449468 | 0.008402318 | 0.117552633  | 0.063625242  | TFR2                          |
| chr20 | 6104215   | 6104886   | 672  | * | 7  | 1.12328E-09 | 0.002523992 | 0.030452293 | 0.004170451 | 0.19585411   | 0.013041591  |                               |
| chr5  | 113698445 | 113698664 | 220  | * | 3  | 1.16651E-07 | 0.007234857 | 0.030460671 | 0.01280452  | 0.060466342  | 0.044662519  | KCNN2                         |
| chr5  | 94955756  | 94956900  | 1145 | * | 8  | 2.05599E-10 | 0.007143189 | 0.030473692 | 0.004562797 | 0.030125949  | 0.011122692  | GPR150                        |
| chr4  | 140477492 | 140478540 | 1049 | * | 11 | 2.32062E-12 | 0.005238214 | 0.030546232 | 0.002073989 | 0.025881755  | 0.007800861  | RP11-342I1.2, SETD7           |
| chr17 | 3183418   | 3183548   | 131  | * | 4  | 1.44052E-08 | 0.000516992 | 0.030568392 | 0.001961235 | -0.200329007 | -0.109590851 | RP11-64J4.2                   |

|       |           |           |      |   |    |             |             |             |             |              |              |                           |
|-------|-----------|-----------|------|---|----|-------------|-------------|-------------|-------------|--------------|--------------|---------------------------|
| chr14 | 65381025  | 65381608  | 584  | * | 12 | 1.86384E-08 | 0.230630389 | 0.030587881 | 0.075963184 | 0.0240346    | 0.007614944  | CHURC1, CHURC1-FNTB, FNTB |
| chr1  | 6644416   | 6645171   | 756  | * | 4  | 2.95138E-08 | 0.011989843 | 0.030614243 | 0.008186011 | 0.125525607  | 0.055432031  | ZBTB48                    |
| chr1  | 59247425  | 59247603  | 179  | * | 4  | 1.23966E-07 | 0.006770902 | 0.030615229 | 0.008537847 | -0.045353319 | -0.03874339  | JUN                       |
| chr10 | 46089769  | 46090807  | 1039 | * | 13 | 4.65135E-14 | 0.005182749 | 0.030615806 | 0.002763571 | 0.054829143  | 0.014798004  | MARCH8                    |
| chr8  | 90770129  | 90770456  | 328  | * | 4  | 2.22349E-09 | 0.003885488 | 0.03062159  | 0.006160647 | 0.019490041  | 0.003323188  | RIPK2                     |
| chr19 | 908894    | 909533    | 640  | * | 4  | 3.01307E-09 | 0.000265832 | 0.030629291 | 0.00114362  | -0.146913345 | -0.090843788 | R3HDM4                    |
| chr19 | 58715251  | 58715677  | 427  | * | 4  | 1.07136E-09 | 0.000540895 | 0.030650894 | 0.002035001 | 0.152500224  | 0.098332548  | ZNF274                    |
| chr12 | 54379466  | 54379493  | 28   | * | 3  | 1.41594E-07 | 0.078975354 | 0.030662488 | 0.057930272 | 0.104615565  | 0.038967585  | HOXC10                    |
| chr8  | 20054372  | 20055012  | 641  | * | 14 | 1.51174E-08 | 0.356053579 | 0.030701069 | 0.099918661 | 0.055267839  | 0.006975449  | ATP6V1B2                  |
| chr13 | 114820807 | 114821832 | 1026 | * | 7  | 1.10546E-12 | 0.000338515 | 0.03074018  | 0.000476463 | 0.133819128  | 0.077011718  | RASA3                     |
| chr13 | 52026439  | 52027945  | 1507 | * | 17 | 3.63055E-15 | 0.040699334 | 0.030752862 | 0.011775292 | -0.078793027 | -0.009585229 | INTS6-AS1, INTS6          |
| chr16 | 31482846  | 31484722  | 1877 | * | 20 | 4.59856E-14 | 0.008603219 | 0.030761067 | 0.003188667 | 0.176625194  | 0.042120384  | TGFB11                    |
| chr12 | 6797663   | 6798801   | 1139 | * | 13 | 5.55753E-15 | 0.072308685 | 0.030795784 | 0.015636909 | -0.131424735 | -0.02695549  | ZNF384                    |
| chr15 | 78631512  | 78633662  | 2151 | * | 24 | 3.5505E-17  | 0.03035806  | 0.030822107 | 0.003061614 | 0.131577805  | 0.027188045  | CRABP1                    |
| chr19 | 12476683  | 12477259  | 577  | * | 4  | 2.82081E-08 | 0.152370386 | 0.030859997 | 0.039297849 | 0.050047422  | 0.017698281  | ZNF442                    |
| chr7  | 115850376 | 115850450 | 75   | * | 5  | 1.95311E-08 | 0.007418052 | 0.030877115 | 0.005095056 | 0.036795751  | 0.016252935  |                           |
| chr21 | 34143691  | 34145043  | 1353 | * | 13 | 6.6861E-13  | 0.004287388 | 0.030903007 | 0.00515859  | -0.065668201 | -0.016357951 | C21orf49, PAXBP1          |
| chr13 | 88328009  | 88329884  | 1876 | * | 11 | 4.5664E-11  | 2.3369E-05  | 0.03090702  | 0.000174005 | -0.164125551 | -0.093818764 | SLITRK5                   |
| chr20 | 7999698   | 8001076   | 1379 | * | 14 | 3.86839E-14 | 0.05670665  | 0.03090727  | 0.004437214 | -0.046875419 | -0.001735678 | RP5-971N18.3, TMX4        |
| chr4  | 122871735 | 122873523 | 1789 | * | 13 | 2.81946E-16 | 3.82022E-05 | 0.030932161 | 9.54469E-05 | -0.041171047 | 0.0101159    | TRPC3                     |
| chr17 | 48278778  | 48279265  | 488  | * | 9  | 3.83617E-17 | 3.10037E-06 | 0.030950715 | 2.74976E-05 | 0.088691584  | 0.050040577  | COL1A1                    |
| chr1  | 97186897  | 97187516  | 620  | * | 7  | 4.05934E-08 | 0.288248903 | 0.030966155 | 0.078186398 | -0.02798768  | -0.005765403 | PTBP2                     |
| chr17 | 30469748  | 30470448  | 701  | * | 7  | 4.49172E-09 | 0.079109808 | 0.030980858 | 0.022718292 | -0.075681904 | -0.019738451 | RHOT1, AC090616.2         |
| chr3  | 182982918 | 182983386 | 469  | * | 3  | 4.1171E-08  | 0.000642475 | 0.030983192 | 0.002030215 | -0.079669081 | -0.070353002 | B3GNT5, MCF2L2            |
| chr20 | 44562842  | 44563668  | 827  | * | 9  | 1.34593E-09 | 0.016841426 | 0.030997053 | 0.009351751 | -0.033504786 | 0.00350569   | PCIF1                     |
| chr13 | 42614071  | 42614179  | 109  | * | 5  | 2.81295E-10 | 0.000920195 | 0.031063269 | 0.00228268  | -0.040365856 | -0.026094816 | DGKH                      |
| chr19 | 42772446  | 42772892  | 447  | * | 4  | 1.92201E-08 | 0.027058831 | 0.031063295 | 0.009115314 | 0.016293931  | 0.004112578  | CIC                       |
| chr13 | 112547341 | 112548306 | 966  | * | 8  | 8.70465E-14 | 5.9622E-05  | 0.031067605 | 0.000107295 | 0.143574899  | 0.080494958  |                           |
| chr19 | 1885142   | 1885717   | 576  | * | 6  | 1.1599E-10  | 0.000316624 | 0.031105488 | 0.001532186 | -0.061280353 | -0.034123597 | ABHD17A                   |



|       |           |           |      |   |    |             |             |             |             |              |              |                                        |
|-------|-----------|-----------|------|---|----|-------------|-------------|-------------|-------------|--------------|--------------|----------------------------------------|
| chr16 | 81772546  | 81773196  | 651  | * | 8  | 6.78033E-12 | 0.001675094 | 0.031112886 | 0.001495138 | -0.075826128 | -0.048456543 | RP11-960L18.1, PLCG2                   |
| chr1  | 236958163 | 236958982 | 820  | * | 16 | 1.58963E-09 | 0.543756866 | 0.031211252 | 0.177271185 | -0.031152471 | -0.001008674 | MTR                                    |
| chr7  | 99213802  | 99214727  | 926  | * | 13 | 1.4593E-14  | 0.000973113 | 0.031234233 | 0.001560028 | -0.11760229  | -0.007508526 | ZSCAN25                                |
| chr1  | 153538406 | 153538964 | 559  | * | 4  | 3.95948E-08 | 0.028003282 | 0.031235507 | 0.011664493 | 0.083446939  | 0.004514183  | S100A2                                 |
| chr2  | 69000590  | 69002111  | 1522 | * | 14 | 6.20405E-18 | 0.001484133 | 0.031240402 | 0.002137468 | 0.120938844  | 0.025832496  | ARHGAP25                               |
| chr2  | 98329337  | 98330493  | 1157 | * | 10 | 1.66175E-13 | 0.005487231 | 0.031246745 | 0.001280358 | 0.125523599  | 0.06039818   | ZAP70                                  |
| chr16 | 66913527  | 66915214  | 1688 | * | 14 | 7.99348E-12 | 0.005880126 | 0.031268792 | 0.004983988 | 0.1132951    | 0.004201496  | PDP2                                   |
| chr14 | 39735211  | 39735496  | 286  | * | 2  | 8.17596E-08 | 0.009504864 | 0.031274873 | 0.014491533 | -0.080987687 | -0.058501485 | RP11-407N17.3, CTAGE5, RP11-407N17.5   |
| chr17 | 28804287  | 28804679  | 393  | * | 5  | 6.322E-08   | 0.050752508 | 0.031280842 | 0.031041932 | -0.033962838 | -0.005326915 | GOSR1                                  |
| chr6  | 31554829  | 31555016  | 188  | * | 4  | 2.00112E-08 | 0.01803198  | 0.031294853 | 0.007707389 | -0.129996841 | -0.046162577 | LST1                                   |
| chr5  | 75012816  | 75013682  | 867  | * | 11 | 5.77894E-13 | 0.000991664 | 0.031335113 | 0.002051586 | 0.104784068  | -0.011827653 | POC5                                   |
| chr4  | 74718978  | 74719306  | 329  | * | 6  | 1.11012E-10 | 0.000287147 | 0.031348009 | 0.000986919 | -0.140278184 | -0.084573976 | PF4V1                                  |
| chr1  | 3649250   | 3649971   | 722  | * | 7  | 9.14811E-10 | 0.192914448 | 0.031373959 | 0.011270972 | 0.214837185  | 0.057128371  | TP73                                   |
| chr17 | 46667587  | 46667812  | 226  | * | 5  | 3.4996E-10  | 0.000937163 | 0.031375913 | 0.001436333 | -0.089547517 | -0.061325553 | HOXB-AS3, HOXB3                        |
| chr8  | 104512506 | 104513083 | 578  | * | 5  | 2.82395E-08 | 0.019286148 | 0.03147893  | 0.008231198 | -0.078254709 | 0.005657437  | RIMS2, RP11-1C8.4                      |
| chr15 | 41245254  | 41245706  | 453  | * | 9  | 2.18012E-08 | 0.408017972 | 0.031514066 | 0.083450263 | 0.021106769  | 0.006296725  | CHAC1                                  |
| chr14 | 39901328  | 39901899  | 572  | * | 7  | 2.26606E-08 | 0.10228739  | 0.031542009 | 0.031471969 | -0.032225527 | -0.004683075 | FBXO33                                 |
| chr5  | 150399890 | 150400180 | 291  | * | 6  | 1.12953E-07 | 0.088357735 | 0.031547777 | 0.012764713 | -0.040865757 | -0.003924653 | GPX3                                   |
| chr5  | 175875380 | 175875427 | 48   | * | 3  | 1.05988E-07 | 0.006393027 | 0.031561619 | 0.008839282 | -0.02477625  | -0.007740248 | FAF2                                   |
| chr9  | 136214605 | 136215687 | 1083 | * | 12 | 7.52239E-15 | 0.001955515 | 0.031561959 | 0.000721091 | -0.070662336 | -0.015484162 | RPL7A, MED22                           |
| chr6  | 31695027  | 31698899  | 3873 | * | 68 | 6.91136E-25 | 0.106521289 | 0.031566641 | 0.001166869 | 0.178585736  | 0.010881596  | DDAH2, CLIC1                           |
| chr10 | 28965584  | 28966475  | 892  | * | 6  | 1.16514E-10 | 0.002688302 | 0.031575492 | 0.004621722 | -0.107809832 | 0.000163669  | BAMBI                                  |
| chr13 | 61989893  | 61990025  | 133  | * | 2  | 1.2494E-07  | 0.075910536 | 0.031608954 | 0.050717995 | 0.114922789  | 0.041967869  | PCDH20                                 |
| chr12 | 89747474  | 89748300  | 827  | * | 4  | 1.40088E-10 | 0.010091824 | 0.031628221 | 0.014826203 | 0.040914814  | 0.006335213  |                                        |
| chr12 | 54388411  | 54389982  | 1572 | * | 9  | 2.56403E-10 | 9.46095E-05 | 0.031637596 | 0.000333    | 0.065478384  | 0.012122583  | RP11-834C11.12, HOXC6, HOXC9, HOXC-AS2 |
| chr17 | 7982773   | 7983254   | 482  | * | 6  | 6.34153E-10 | 0.001606472 | 0.031645901 | 0.002570176 | 0.023138801  | 0.012596345  | AC129492.6, ALOX12B                    |
| chr2  | 24149416  | 24150622  | 1207 | * | 9  | 8.31728E-15 | 1.45328E-05 | 0.031706856 | 8.61921E-05 | -0.0454985   | -0.004142076 | UBXN2A, ATAD2B                         |
| chr2  | 166649910 | 166650805 | 896  | * | 5  | 8.28521E-11 | 0.004918236 | 0.031707881 | 0.003822364 | -0.032596366 | 0.00178942   | GALNT3                                 |
| chr1  | 85666272  | 85667233  | 962  | * | 7  | 1.7063E-11  | 0.010946687 | 0.031708901 | 0.004606187 | 0.029457542  | 0.013723723  | SYDE2                                  |

|       |           |           |      |   |    |             |             |             |             |              |              |                      |
|-------|-----------|-----------|------|---|----|-------------|-------------|-------------|-------------|--------------|--------------|----------------------|
| chr11 | 2720810   | 2722713   | 1904 | * | 32 | 3.85384E-37 | 1.80293E-05 | 0.031720804 | 2.17676E-06 | -0.151681033 | -0.060851387 | KCNQ1, KCNQ1OT1      |
| chr11 | 65405760  | 65407734  | 1975 | * | 11 | 7.70573E-12 | 0.025181946 | 0.031724951 | 0.001837644 | -0.185096025 | -0.040682431 | SIPA1                |
| chr2  | 55844203  | 55844929  | 727  | * | 7  | 6.73589E-11 | 0.019897491 | 0.031745295 | 0.005262731 | 0.022584773  | -0.00275171  | SMEK2                |
| chr10 | 70167214  | 70167341  | 128  | * | 5  | 1.79081E-08 | 0.007459216 | 0.031763525 | 0.008426542 | -0.043714463 | -0.011161747 |                      |
| chr2  | 97405048  | 97406466  | 1419 | * | 15 | 2.68154E-08 | 0.425576144 | 0.03177178  | 0.083305973 | 0.170091408  | -0.001472379 | LMAN2L               |
| chr15 | 90293883  | 90294776  | 894  | * | 11 | 3.35862E-13 | 0.018732447 | 0.031809078 | 0.005489824 | 0.060488029  | 0.014446634  | MESP1                |
| chr9  | 4299221   | 4299245   | 25   | * | 2  | 1.84995E-07 | 0.011529203 | 0.031839764 | 0.016766975 | 0.015731118  | 0.015459373  | GLIS3                |
| chr2  | 47596073  | 47596787  | 715  | * | 9  | 8.1004E-12  | 0.018766697 | 0.031841487 | 0.006164823 | -0.076401956 | -0.010413905 | EPCAM                |
| chr11 | 2321770   | 2323459   | 1690 | * | 30 | 6.94326E-23 | 0.000248993 | 0.031847234 | 0.000183886 | -0.085159882 | -0.024240971 | TSPAN32, C11orf21    |
| chr9  | 132565255 | 132566166 | 912  | * | 9  | 1.287E-10   | 0.000790981 | 0.031870192 | 0.001120827 | -0.108106211 | -0.018697003 | TOR1B                |
| chr11 | 59383068  | 59383888  | 821  | * | 9  | 3.24542E-10 | 0.316378273 | 0.031892522 | 0.063194635 | -0.049132095 | -0.00421542  | OSBP                 |
| chr1  | 226410871 | 226411715 | 845  | * | 10 | 7.52509E-11 | 0.119238625 | 0.031904771 | 0.023212418 | 0.191790263  | 0.03917369   | MIXL1                |
| chr2  | 173291908 | 173293811 | 1904 | * | 23 | 4.58446E-17 | 0.001070974 | 0.031926155 | 0.00023262  | 0.073361799  | 0.003034296  | ITGA6, AC078883.4    |
| chr19 | 2050859   | 2050866   | 8    | * | 2  | 1.53229E-07 | 0.650570751 | 0.031930404 | 0.082850317 | 0.032009022  | 0.015920777  | MKNK2                |
| chr1  | 182361453 | 182362088 | 636  | * | 6  | 5.72339E-08 | 0.766846063 | 0.031981611 | 0.194917617 | -0.02987393  | -0.010057543 |                      |
| chr3  | 138328184 | 138328334 | 151  | * | 3  | 2.37503E-08 | 0.006859818 | 0.032035616 | 0.011586223 | -0.034975448 | -0.027860919 | FAIM                 |
| chr9  | 131872005 | 131874186 | 2182 | * | 18 | 2.15192E-16 | 4.62858E-06 | 0.032064837 | 3.08674E-05 | -0.075953679 | -0.02002946  | PPP2R4, CRAT         |
| chr4  | 113152836 | 113153655 | 820  | * | 6  | 6.24017E-10 | 0.187405172 | 0.032095941 | 0.04610957  | -0.056971864 | -0.014742175 | AP1AR                |
| chr7  | 132766817 | 132767313 | 497  | * | 11 | 8.8669E-09  | 0.287530101 | 0.032097868 | 0.09052195  | -0.062019466 | -0.007456936 | CHCHD3               |
| chr13 | 84455525  | 84455742  | 218  | * | 4  | 7.60561E-09 | 0.010713437 | 0.032189449 | 0.010289985 | 0.092869424  | 0.03391413   | SLITRK1              |
| chr1  | 45956256  | 45957060  | 805  | * | 10 | 2.51755E-12 | 0.015272425 | 0.032191226 | 0.007054314 | -0.057080456 | -0.010395162 | TESK2                |
| chr17 | 58677051  | 58677844  | 794  | * | 9  | 9.23723E-10 | 0.037633059 | 0.032239669 | 0.019228698 | 0.022786066  | -0.001965734 | PPM1D                |
| chr3  | 48593844  | 48594968  | 1125 | * | 11 | 3.25287E-12 | 0.001769598 | 0.032288602 | 0.004052912 | -0.05669824  | -0.007323074 | PFKFB4               |
| chr3  | 51975220  | 51977255  | 2036 | * | 18 | 3.71066E-14 | 0.001116637 | 0.032323542 | 0.001027134 | 0.141220849  | 0.005130591  | PARP3, RRP9          |
| chr15 | 89630886  | 89632159  | 1274 | * | 13 | 1.11688E-10 | 0.038890106 | 0.032330485 | 0.0160966   | -0.047316745 | -0.006764176 | ABHD2, RP11-326A19.3 |
| chr12 | 117627286 | 117628187 | 902  | * | 7  | 8.46438E-12 | 0.011301455 | 0.032375686 | 0.005535628 | 0.061790356  | 0.02182529   | FBXO21               |
| chr17 | 73150004  | 73151410  | 1407 | * | 14 | 5.1394E-17  | 0.002973455 | 0.032406792 | 0.0007572   | 0.046832442  | 0.009220954  | HN1                  |
| chr5  | 146832518 | 146833665 | 1148 | * | 6  | 1.42575E-11 | 0.004902927 | 0.032507578 | 0.005970069 | 0.020527853  | 0.008093799  | DPYSL3               |
| chr1  | 169555674 | 169556312 | 639  | * | 9  | 2.87259E-09 | 0.003036999 | 0.032522257 | 0.007322289 | 0.123389317  | 0.035584849  | F5                   |

|       |           |           |      |   |    |             |             |             |             |              |              |                                     |
|-------|-----------|-----------|------|---|----|-------------|-------------|-------------|-------------|--------------|--------------|-------------------------------------|
| chr6  | 34203887  | 34204913  | 1027 | * | 8  | 5.10907E-11 | 0.01618935  | 0.032524369 | 0.006297132 | -0.057685596 | -0.022701116 | HMGA1                               |
| chr3  | 155587952 | 155588386 | 435  | * | 9  | 8.82163E-09 | 0.043475555 | 0.032537948 | 0.040905885 | 0.024389399  | 0.000828638  | GMPS                                |
| chr21 | 43916100  | 43917047  | 948  | * | 12 | 3.52639E-09 | 0.141729447 | 0.032630697 | 0.050473949 | 0.022893368  | 0.007282585  | SLC37A1, AP001625.4, RSPH1          |
| chr20 | 60717299  | 60718270  | 972  | * | 6  | 2.21071E-10 | 0.005905021 | 0.032665231 | 0.010645945 | -0.045630452 | -0.006691461 | PSMA7                               |
| chr17 | 56408688  | 56408804  | 117  | * | 4  | 1.31353E-07 | 0.139069077 | 0.032679779 | 0.054224364 | -0.059219129 | -0.007848635 | BZRAP1-AS1, MIR142                  |
| chr10 | 105727248 | 105727425 | 178  | * | 3  | 6.92563E-08 | 0.253351611 | 0.032685827 | 0.06093876  | 0.014564468  | 0.006408949  | SLK                                 |
| chr14 | 52455552  | 52456445  | 894  | * | 11 | 7.94564E-10 | 0.227900064 | 0.032707019 | 0.036071465 | -0.237029206 | -0.040276465 | C14orf166                           |
| chr1  | 119531093 | 119532773 | 1681 | * | 16 | 7.27445E-14 | 0.001429433 | 0.032717106 | 0.000849644 | 0.071915897  | 0.036648308  | TBX15                               |
| chr17 | 39992344  | 39992697  | 354  | * | 7  | 1.06086E-08 | 0.013184301 | 0.032759715 | 0.011590597 | 0.213395574  | 0.02062344   | KLHL10, NT5C3B                      |
| chr5  | 114938002 | 114938439 | 438  | * | 9  | 5.70666E-08 | 0.302665901 | 0.032769331 | 0.080630186 | -0.061888596 | -0.012063724 | AC010226.4, TMED7-TICAM2,<br>TICAM2 |
| chr4  | 83718952  | 83719566  | 615  | * | 4  | 1.38721E-11 | 0.000870121 | 0.032813248 | 0.002456394 | -0.049674214 | 0.004096365  | SCD5                                |
| chr12 | 98986733  | 98986887  | 155  | * | 3  | 6.94589E-09 | 0.002768918 | 0.032880514 | 0.005706642 | -0.126667058 | 0.003245073  |                                     |
| chr17 | 76183078  | 76183641  | 564  | * | 13 | 2.10937E-12 | 0.043639722 | 0.032894387 | 0.011839692 | 0.045409052  | 0.00535245   | AFMID, TK1                          |
| chr1  | 90097496  | 90097981  | 486  | * | 6  | 2.62726E-10 | 0.050898374 | 0.032908275 | 0.008577772 | 0.098187114  | 0.04504493   | RP11-413E1.4, RP5-1007M22.2         |
| chr4  | 188916496 | 188917251 | 756  | * | 12 | 2.30829E-10 | 0.052270532 | 0.032944431 | 0.023192323 | 0.110897624  | 0.030602466  | ZFP42                               |
| chr22 | 31794522  | 31796123  | 1602 | * | 12 | 9.82178E-10 | 0.002374697 | 0.032972331 | 0.004124266 | -0.10125992  | -0.021398095 | DRG1                                |
| chr11 | 75379223  | 75379867  | 645  | * | 11 | 1.24583E-10 | 0.025465791 | 0.03299268  | 0.030206789 | 0.03501249   | 0.008097944  | MAP6                                |
| chr16 | 57495650  | 57496971  | 1322 | * | 13 | 1.37186E-13 | 0.006166832 | 0.033027831 | 0.003275968 | 0.131888784  | 0.027052289  | AC009052.12, POLR2C                 |
| chr11 | 111782282 | 111783355 | 1074 | * | 10 | 4.49688E-10 | 0.134455616 | 0.033078527 | 0.036795859 | 0.112937004  | 0.045540956  | HSPB2, CRYAB                        |
| chr17 | 28256424  | 28257543  | 1120 | * | 14 | 1.84258E-12 | 0.015706549 | 0.033091616 | 0.005739248 | -0.084211301 | -0.01092257  | EFCAB5, SSH2                        |
| chr17 | 76037035  | 76037562  | 528  | * | 6  | 2.46E-10    | 0.000410442 | 0.033137034 | 0.001507574 | -0.161477394 | -0.102742624 | TNRC6C                              |
| chr16 | 85342729  | 85343650  | 922  | * | 5  | 2.2019E-10  | 0.000412027 | 0.033147725 | 0.001165116 | -0.062885466 | -0.045549319 |                                     |
| chr7  | 128695016 | 128695548 | 533  | * | 12 | 4.04535E-09 | 0.119559156 | 0.033151611 | 0.059973842 | -0.044059869 | -0.004768324 | TNPO3                               |
| chr10 | 64575798  | 64578186  | 2389 | * | 17 | 2.89903E-10 | 0.017089548 | 0.033155739 | 0.00442414  | -0.055760485 | 0.003507579  | EGR2                                |
| chr14 | 23341133  | 23342291  | 1159 | * | 7  | 7.87582E-10 | 0.005331818 | 0.033159036 | 0.008390534 | 0.147572244  | 0.02089736   | LRP10                               |
| chr3  | 127346859 | 127348828 | 1970 | * | 13 | 2.62112E-09 | 0.015854632 | 0.033160651 | 0.003064477 | 0.133959645  | 0.025172899  | PODXL2                              |
| chr19 | 39109076  | 39110397  | 1322 | * | 12 | 1.0883E-10  | 0.004320627 | 0.033179078 | 0.003997277 | 0.063959832  | -0.004947586 | EIF3K, MAP4K1                       |
| chr19 | 1904288   | 1905417   | 1130 | * | 11 | 1.1732E-09  | 0.002090578 | 0.033183352 | 0.00470632  | -0.074983592 | -0.008451142 | SCAMP4, ADAT3                       |
| chr17 | 40823420  | 40823930  | 511  | * | 3  | 5.80083E-09 | 0.012289015 | 0.033206984 | 0.012926653 | 0.18727026   | 0.132365311  | PLEKHH3                             |

|       |           |           |      |   |    |             |             |             |             |              |              |                                                  |
|-------|-----------|-----------|------|---|----|-------------|-------------|-------------|-------------|--------------|--------------|--------------------------------------------------|
| chr20 | 60877067  | 60877648  | 582  | * | 4  | 8.37941E-11 | 0.00262575  | 0.033225612 | 0.005417665 | -0.057162754 | -0.020555882 | ADRM1                                            |
| chr7  | 999981    | 999994    | 14   | * | 2  | 1.4573E-07  | 0.004723574 | 0.033227487 | 0.008624036 | 0.086870912  | 0.08355648   | COX19                                            |
| chr17 | 40539702  | 40540865  | 1164 | * | 14 | 1.85069E-11 | 0.099310749 | 0.033244513 | 0.018701835 | -0.049731236 | -0.006401042 | STAT3                                            |
| chr21 | 34863496  | 34865077  | 1582 | * | 20 | 5.08911E-17 | 0.029660153 | 0.033244615 | 0.00116317  | -0.111772952 | -0.011772975 | DNAJC28                                          |
| chr2  | 64751054  | 64751596  | 543  | * | 8  | 2.23001E-08 | 0.059137436 | 0.033294293 | 0.042757913 | 0.021839033  | 0.00689794   | AFTPH, RP11-568N6.1                              |
| chr11 | 128776112 | 128776548 | 437  | * | 3  | 2.7921E-09  | 0.006602858 | 0.033320617 | 0.009246824 | 0.106668877  | 0.017530058  | KCNJ5                                            |
| chr17 | 6898315   | 6901744   | 3430 | * | 24 | 3.08469E-20 | 3.79233E-06 | 0.033364627 | 5.64904E-06 | -0.206250654 | -0.027842432 | ALOX12, AC027763.2, RP11-589P10.7, RP11-589P10.5 |
| chr19 | 50935676  | 50936172  | 497  | * | 7  | 2.07046E-11 | 0.003220952 | 0.033381466 | 0.001849954 | 0.122497824  | 0.031372177  | MYBPC2                                           |
| chr1  | 24513672  | 24515560  | 1889 | * | 16 | 7.49745E-11 | 0.002704344 | 0.033385344 | 0.00266386  | 0.142855326  | 0.004757206  | IFNLR1                                           |
| chr6  | 7106947   | 7107129   | 183  | * | 4  | 3.11057E-10 | 0.001084312 | 0.033409137 | 0.003139641 | -0.0571261   | -0.038232763 |                                                  |
| chr3  | 25824257  | 25825855  | 1599 | * | 15 | 2.10327E-10 | 0.121220694 | 0.033434031 | 0.019839139 | -0.148939855 | -0.00930718  | OXSM, NGLY1                                      |
| chr3  | 38080925  | 38081287  | 363  | * | 3  | 1.76531E-08 | 0.004039611 | 0.033437867 | 0.008675321 | 0.038340739  | 0.019809579  | DLEC1                                            |
| chr8  | 86089007  | 86089337  | 331  | * | 6  | 3.1213E-09  | 0.10138425  | 0.033439394 | 0.015498138 | 0.097326167  | 0.023603761  | RP11-219B4.7                                     |
| chr17 | 42634716  | 42634955  | 240  | * | 2  | 1.68833E-08 | 0.004885313 | 0.033470984 | 0.00887697  | -0.086426869 | -0.078469699 | FZD2                                             |
| chr19 | 18303328  | 18303893  | 566  | * | 7  | 2.20922E-08 | 0.025585413 | 0.033514416 | 0.018909217 | 0.022070986  | 0.002139906  |                                                  |
| chr4  | 76439140  | 76439704  | 565  | * | 14 | 6.96233E-10 | 0.361861325 | 0.033520112 | 0.123370495 | -0.040829557 | -0.008326977 | THAP6, RCHY1                                     |
| chr16 | 4897216   | 4897716   | 501  | * | 4  | 7.22435E-09 | 0.017454129 | 0.033534543 | 0.021450659 | -0.032965957 | -0.016658677 | UBN1, GLYR1                                      |
| chr1  | 86621931  | 86623101  | 1171 | * | 8  | 8.90612E-11 | 0.002313648 | 0.033538163 | 0.003366709 | -0.05585043  | -0.019524183 | COL24A1                                          |
| chr19 | 17622109  | 17622568  | 460  | * | 7  | 8.27504E-09 | 0.046376576 | 0.033556626 | 0.020213962 | -0.061594617 | -0.017063301 | PGLS, CTD-3131K8.2                               |
| chr1  | 156390220 | 156390418 | 199  | * | 4  | 4.56795E-08 | 0.002820564 | 0.033587985 | 0.004909145 | 0.089790587  | 0.050466307  | MIR9-1, C1orf61                                  |
| chr6  | 31648146  | 31649728  | 1583 | * | 34 | 8.81152E-19 | 0.001947255 | 0.033592086 | 0.003241412 | 0.135295714  | 0.00827958   | LY6G5C                                           |
| chr4  | 25235416  | 25235765  | 350  | * | 9  | 1.59065E-08 | 0.175320351 | 0.033597342 | 0.033480615 | -0.105459595 | -0.006551591 | PI4K2B                                           |
| chr5  | 61601128  | 61601647  | 520  | * | 5  | 1.52037E-10 | 0.007014863 | 0.033628608 | 0.00257236  | 0.149734757  | 0.027077869  |                                                  |
| chr8  | 56852148  | 56852290  | 143  | * | 4  | 1.83781E-07 | 0.012196194 | 0.03364255  | 0.018887424 | -0.054485411 | -0.03331484  | LYN                                              |
| chr6  | 34759890  | 34760183  | 294  | * | 3  | 1.26981E-09 | 0.029202971 | 0.033654896 | 0.0254082   | 0.028696978  | -0.003170359 | UHRF1BP1                                         |
| chr5  | 150631895 | 150632733 | 839  | * | 11 | 2.65588E-11 | 0.051511706 | 0.033697868 | 0.012851752 | -0.233851675 | -0.028268638 | GM2A                                             |
| chr16 | 89940311  | 89940631  | 321  | * | 3  | 1.79012E-09 | 0.002077596 | 0.033719579 | 0.004869537 | -0.049297399 | -0.035695464 | TCF25                                            |
| chr5  | 43042726  | 43043360  | 635  | * | 4  | 1.59191E-08 | 0.016069996 | 0.033724015 | 0.011213189 | -0.045329556 | -0.005400343 | AC025171.1, CTD-2201E18.3, ANXA2R                |
| chr7  | 142659349 | 142659757 | 409  | * | 4  | 3.49288E-08 | 0.001363802 | 0.033742203 | 0.003744493 | 0.121194347  | 0.065596396  | KEL                                              |

|       |           |           |      |   |    |             |             |             |             |              |              |                              |
|-------|-----------|-----------|------|---|----|-------------|-------------|-------------|-------------|--------------|--------------|------------------------------|
| chr3  | 105085991 | 105087718 | 1728 | * | 10 | 1.09694E-12 | 0.000484168 | 0.033791796 | 0.001488447 | -0.052001045 | -0.003739937 | ALCAM                        |
| chr10 | 99052468  | 99053150  | 683  | * | 10 | 1.16879E-11 | 0.046041814 | 0.033815504 | 0.019732696 | 0.153089558  | 0.022851434  |                              |
| chr12 | 6876188   | 6877080   | 893  | * | 7  | 2.97056E-10 | 0.013686996 | 0.033822207 | 0.004050729 | 0.075572145  | 0.024716041  | PTMS, MLF2                   |
| chr16 | 70414267  | 70414816  | 550  | * | 3  | 1.21536E-07 | 0.001376166 | 0.033890484 | 0.003705592 | -0.047407764 | -0.024185809 | RP11-529K1.4, ST3GAL2        |
| chr14 | 56777076  | 56778402  | 1327 | * | 9  | 8.76348E-13 | 8.64284E-05 | 0.033900309 | 0.000262039 | -0.174176518 | -0.012239864 | RP11-930O11.1, RP11-930O11.2 |
| chr12 | 102455204 | 102455923 | 720  | * | 8  | 1.31628E-09 | 0.011206965 | 0.03396283  | 0.014568362 | 0.033391733  | 0.007347376  | CCDC53                       |
| chr19 | 49622373  | 49623726  | 1354 | * | 8  | 8.40782E-13 | 0.002969368 | 0.033962885 | 0.002006129 | -0.142624462 | -0.017103058 | PPFIA3, C19orf73             |
| chr6  | 31627511  | 31629199  | 1689 | * | 28 | 3.30936E-17 | 0.007367878 | 0.033993709 | 0.001556063 | 0.187658953  | 0.02080208   | C6orf47-AS1, C6orf47, GPANK1 |
| chr1  | 36396054  | 36396445  | 392  | * | 8  | 1.13622E-08 | 0.045336243 | 0.034088749 | 0.033296789 | -0.102293378 | -0.029073553 | AGO3                         |
| chr19 | 6736979   | 6738762   | 1784 | * | 19 | 4.25705E-15 | 0.002893177 | 0.034142765 | 0.004923629 | -0.050198291 | -0.01295482  | TRIP10, GPR108               |
| chr21 | 35746798  | 35747831  | 1034 | * | 11 | 1.61304E-11 | 0.099144857 | 0.034170831 | 0.024345208 | -0.087815598 | -0.012727915 | SMIM11, AP000320.6           |
| chr1  | 68150731  | 68152310  | 1580 | * | 10 | 5.7674E-09  | 0.015972264 | 0.034208205 | 0.012848957 | 0.055874675  | 0.006527445  | GADD45A                      |
| chr6  | 27280506  | 27280722  | 217  | * | 3  | 4.37971E-08 | 0.031922274 | 0.034269752 | 0.027821194 | -0.034262747 | -0.004701889 |                              |
| chr6  | 134217242 | 134217401 | 160  | * | 2  | 1.25716E-07 | 0.005022754 | 0.034322934 | 0.009136766 | 0.051265947  | 0.033268767  |                              |
| chr17 | 78193187  | 78193423  | 237  | * | 4  | 1.04022E-07 | 0.019598014 | 0.034324905 | 0.018846002 | -0.032958876 | -0.004444764 | SGSH                         |
| chr4  | 128886005 | 128886867 | 863  | * | 17 | 5.88457E-09 | 0.704388507 | 0.034355295 | 0.150215477 | -0.025371338 | -0.002227249 | C4orf29, MFSD8               |
| chr16 | 88844969  | 88845204  | 236  | * | 4  | 4.31437E-09 | 0.002627852 | 0.034368043 | 0.00424172  | 0.15228282   | 0.080376976  | PIEZO1                       |
| chr2  | 128785194 | 128786246 | 1053 | * | 9  | 1.90972E-09 | 0.072119224 | 0.034439033 | 0.023884647 | 0.020306309  | 0.007051363  | SAP130                       |
| chr5  | 109024217 | 109026041 | 1825 | * | 11 | 5.14739E-11 | 0.000510661 | 0.034443365 | 0.000302618 | -0.054604849 | -0.005805385 | MAN2A1                       |
| chr1  | 231472815 | 231474257 | 1443 | * | 20 | 5.72112E-13 | 0.024531099 | 0.034486863 | 0.026975588 | -0.028792229 | -0.000752484 | SPRNTN, EXOC8                |
| chr16 | 89023389  | 89023633  | 245  | * | 3  | 1.16451E-08 | 0.001066592 | 0.034527291 | 0.003125518 | 0.166573353  | 0.129445499  | CBFA2T3                      |
| chr13 | 112721712 | 112721950 | 239  | * | 7  | 8.34173E-09 | 0.012190209 | 0.034547096 | 0.01099827  | 0.10744      | 0.059253965  | SOX1                         |
| chr6  | 31867757  | 31870990  | 3234 | * | 43 | 4.59864E-13 | 0.011309859 | 0.034579518 | 0.002778303 | 0.138703598  | 0.005146363  | C2, ZBTB12                   |
| chr11 | 18813191  | 18813556  | 366  | * | 7  | 2.89839E-08 | 0.12363838  | 0.034607688 | 0.030965806 | -0.073465088 | -0.01853549  | PTPN5                        |
| chr15 | 45740221  | 45741008  | 788  | * | 9  | 7.11047E-13 | 0.002093514 | 0.034608458 | 0.001807154 | -0.149920494 | -0.043601479 | C15orf48, RP11-519G16.3      |
| chr5  | 141487482 | 141488201 | 720  | * | 10 | 5.19721E-12 | 0.050634762 | 0.034644593 | 0.010755549 | 0.122028605  | 0.048285212  | NDFIP1                       |
| chr4  | 77996840  | 77996859  | 20   | * | 2  | 9.11907E-08 | 0.005278338 | 0.034664806 | 0.009531583 | 0.008777263  | 0.008589863  | CCNI                         |
| chr2  | 55746825  | 55747270  | 446  | * | 3  | 5.74614E-09 | 0.09208803  | 0.034667294 | 0.044142515 | -0.038683958 | -0.00851206  | CCDC104                      |
| chr4  | 149363450 | 149363912 | 463  | * | 9  | 5.84175E-11 | 0.004711951 | 0.034691508 | 0.005130838 | 0.024503355  | 0.008701351  | NR3C2                        |

|       |           |           |      |   |    |             |             |             |             |              |              |                             |
|-------|-----------|-----------|------|---|----|-------------|-------------|-------------|-------------|--------------|--------------|-----------------------------|
| chr17 | 81041756  | 81042023  | 268  | * | 4  | 8.11391E-08 | 0.041129193 | 0.0346988   | 0.015373821 | -0.110606581 | -0.059655329 | METRNL                      |
| chr3  | 127872092 | 127873114 | 1023 | * | 12 | 3.69371E-10 | 0.071092035 | 0.03472145  | 0.016798491 | 0.023200813  | 0.005982844  | EEFSEC, RUVBL1              |
| chr3  | 150420821 | 150421424 | 604  | * | 6  | 9.07124E-10 | 0.166727534 | 0.034747093 | 0.047103163 | 0.111079131  | 0.040406038  | RP11-103G8.2, FAM194A       |
| chr9  | 90113281  | 90114156  | 876  | * | 8  | 5.38032E-11 | 0.037069345 | 0.03475981  | 0.003397949 | -0.070067194 | -0.024651857 | DAPK1                       |
| chr1  | 45476118  | 45476762  | 645  | * | 6  | 8.99891E-09 | 0.142759034 | 0.034769181 | 0.044503131 | 0.042940429  | 0.014231479  | HECTD3                      |
| chr10 | 38146040  | 38147196  | 1157 | * | 20 | 1.52921E-13 | 0.009129655 | 0.034777649 | 0.009679606 | -0.047419096 | 0.000184713  | RP11-162G10.5, ZNF248       |
| chr12 | 96252937  | 96253460  | 524  | * | 4  | 5.75714E-09 | 0.015685032 | 0.034793156 | 0.018281991 | 0.029764562  | 0.014011685  | SNRPF                       |
| chr4  | 25915260  | 25916067  | 808  | * | 8  | 3.70381E-10 | 0.009892722 | 0.034804074 | 0.006733997 | -0.053504996 | -0.000755807 | SMIM20                      |
| chr3  | 124302724 | 124303745 | 1022 | * | 12 | 7.24926E-12 | 0.05977718  | 0.034808913 | 0.009553395 | 0.122254366  | 0.035268054  | KALRN                       |
| chr11 | 126173810 | 126174329 | 520  | * | 7  | 9.8121E-10  | 0.01368803  | 0.034864353 | 0.009398911 | -0.049829877 | -0.00301801  | DCPS, RP11-712L6.5          |
| chr9  | 2014957   | 2015056   | 100  | * | 2  | 1.8461E-07  | 0.013058301 | 0.034881478 | 0.018944074 | -0.042793542 | -0.031584128 |                             |
| chr19 | 13263341  | 13264324  | 984  | * | 6  | 8.85336E-10 | 0.013358379 | 0.03488265  | 0.009993605 | 0.025170911  | 0.004485     | IER2, CTC-250I14.6          |
| chr7  | 101459283 | 101459954 | 672  | * | 7  | 1.42376E-09 | 0.01152923  | 0.034884204 | 0.011274232 | 0.018607783  | 0.004997719  | CUX1                        |
| chr2  | 179343803 | 179344387 | 585  | * | 3  | 2.51948E-09 | 0.003470325 | 0.034885627 | 0.00747865  | -0.08261221  | -0.045083813 |                             |
| chr13 | 80915122  | 80915525  | 404  | * | 7  | 2.39076E-09 | 0.012466686 | 0.034900555 | 0.007629885 | -0.090477944 | -0.007279569 |                             |
| chr12 | 50016493  | 50016798  | 306  | * | 6  | 1.06627E-08 | 0.049460108 | 0.034927248 | 0.027020931 | 0.024420814  | 0.005994524  | PRPF40B                     |
| chr1  | 26947282  | 26947893  | 612  | * | 6  | 7.19035E-11 | 0.000354349 | 0.034935541 | 0.000817422 | -0.040156136 | -0.011155776 |                             |
| chr13 | 100633154 | 100633502 | 349  | * | 4  | 1.55127E-08 | 0.017091468 | 0.035045968 | 0.022011253 | 0.029056305  | 0.020894284  |                             |
| chr16 | 67977865  | 67978450  | 586  | * | 10 | 2.6087E-14  | 0.000293659 | 0.035078296 | 0.001243481 | 0.177330078  | 0.050440594  | LCAT, SLC12A4, CTC-479C5.17 |
| chr16 | 1822289   | 1822795   | 507  | * | 4  | 2.43631E-08 | 0.071022237 | 0.035078681 | 0.048535205 | 0.023030821  | 0.015436656  | MRPS34                      |
| chr12 | 107487485 | 107487874 | 390  | * | 6  | 5.18072E-08 | 0.06896739  | 0.035078922 | 0.051038446 | -0.058316036 | -0.006686295 | RP11-797M17.1, CRY1         |
| chr15 | 90727363  | 90728157  | 795  | * | 11 | 7.07429E-16 | 0.014979562 | 0.035103341 | 0.001795641 | -0.139709274 | 0.025817994  | SEMA4B                      |
| chr1  | 165599603 | 165600573 | 971  | * | 13 | 5.27754E-13 | 0.012080015 | 0.035130657 | 0.005638842 | 0.036488327  | 0.006543691  | MGST3                       |
| chr19 | 859065    | 859983    | 919  | * | 8  | 2.7822E-09  | 0.135662363 | 0.035159531 | 0.016958711 | -0.11676956  | -0.047376514 | CFD                         |
| chr17 | 40168882  | 40170049  | 1168 | * | 19 | 9.27556E-13 | 0.754573985 | 0.035173791 | 0.085223401 | 0.022493346  | 0.001080222  | NKIRAS2, DNAJC7             |
| chr4  | 38524849  | 38526047  | 1199 | * | 7  | 8.36754E-10 | 0.000757823 | 0.035278454 | 0.000686177 | -0.14574039  | 0.056337593  |                             |
| chr8  | 103818636 | 103818919 | 284  | * | 4  | 3.61697E-09 | 0.001644023 | 0.0353529   | 0.003956017 | -0.051592296 | -0.002434153 | KB-1732A1.1                 |
| chr1  | 55680726  | 55681841  | 1116 | * | 10 | 2.72556E-14 | 0.000630352 | 0.035372584 | 0.000405523 | -0.056250221 | -0.010675188 | USP24                       |
| chr12 | 56709155  | 56709880  | 726  | * | 7  | 2.93594E-11 | 0.005171493 | 0.035452057 | 0.002508928 | 0.02574291   | 0.011249141  | RP11-977G19.10, CNPY2       |

|       |           |           |      |   |    |             |             |             |             |              |              |                       |
|-------|-----------|-----------|------|---|----|-------------|-------------|-------------|-------------|--------------|--------------|-----------------------|
| chr19 | 5622997   | 5623459   | 463  | * | 12 | 4.56494E-10 | 0.237082107 | 0.035470033 | 0.057336903 | 0.02089245   | 0.003364999  | SAFB, SAFB2           |
| chr20 | 61953801  | 61954258  | 458  | * | 4  | 1.39552E-07 | 0.001925348 | 0.035515821 | 0.005564296 | 0.081059364  | 0.072820036  | COL20A1               |
| chr7  | 77165728  | 77167726  | 1999 | * | 20 | 1.46075E-17 | 3.89484E-05 | 0.035521771 | 0.000550223 | -0.190860116 | -0.027420363 | PTPN12                |
| chr15 | 90118406  | 90119427  | 1022 | * | 12 | 1.22778E-13 | 0.002917522 | 0.035538249 | 0.002306223 | -0.045864364 | -0.000575181 | RP11-429B14.1, TICRR  |
| chr6  | 37467396  | 37467799  | 404  | * | 8  | 1.00893E-11 | 0.000767421 | 0.035571334 | 0.002293403 | 0.037400161  | 0.013735165  | CCDC167               |
| chr1  | 146643600 | 146644500 | 901  | * | 11 | 2.95892E-11 | 0.020867548 | 0.035597571 | 0.009823618 | 0.024379689  | 0.010468752  | RP11-337C18.8, PRKAB2 |
| chr15 | 74988326  | 74988803  | 478  | * | 11 | 3.61257E-08 | 0.0698219   | 0.03564341  | 0.045350061 | -0.04693237  | -0.000606768 | EDC3                  |
| chr17 | 27037982  | 27039132  | 1151 | * | 14 | 9.5299E-17  | 0.002024603 | 0.035695217 | 0.000954916 | -0.06308737  | -0.002075663 | PROCA1                |
| chr19 | 49658548  | 49659299  | 752  | * | 6  | 5.76494E-09 | 0.002239767 | 0.035744136 | 0.004318188 | 0.119891684  | 0.069628772  | HRC                   |
| chr16 | 3988694   | 3988700   | 7    | * | 2  | 5.90202E-08 | 0.005601485 | 0.035744253 | 0.010076378 | -0.178975268 | -0.173394899 | RP11-462G12.2         |
| chr5  | 180229544 | 180230767 | 1224 | * | 12 | 1.66157E-13 | 0.134931989 | 0.035792831 | 0.011724557 | -0.044255817 | -0.002982215 | MGAT1                 |
| chr4  | 103421931 | 103422974 | 1044 | * | 10 | 8.1141E-13  | 0.005459471 | 0.035795709 | 0.004463064 | 0.029272652  | 0.003005989  | NFKB1, AF213884.2     |
| chr8  | 61428991  | 61429827  | 837  | * | 12 | 8.67126E-10 | 0.267987799 | 0.03584629  | 0.03024487  | -0.043434341 | -0.003767024 | RAB2A, RP11-163N6.2   |
| chr17 | 41322915  | 41323562  | 648  | * | 10 | 3.66833E-09 | 0.31260764  | 0.035848894 | 0.070837723 | -0.098215162 | -0.023525734 | NBR1                  |
| chr1  | 205290353 | 205290930 | 578  | * | 7  | 2.22219E-08 | 0.055500571 | 0.035863181 | 0.055160166 | 0.023402499  | 0.004846942  | NUAK2                 |
| chr1  | 51442861  | 51443457  | 597  | * | 6  | 1.93463E-09 | 0.004274546 | 0.035907773 | 0.009552781 | 0.022056915  | 0.008699264  |                       |
| chr5  | 1800782   | 1801904   | 1123 | * | 8  | 2.04696E-09 | 0.068960823 | 0.035918507 | 0.01689066  | -0.04256349  | -0.000278562 | NDUFS6, MRPL36        |
| chr1  | 119548852 | 119550484 | 1633 | * | 9  | 1.6161E-13  | 8.46756E-06 | 0.035957063 | 7.63216E-05 | 0.079497343  | 0.055823688  |                       |
| chr17 | 79884562  | 79886116  | 1555 | * | 15 | 7.79166E-17 | 0.000718606 | 0.035969273 | 0.00041291  | -0.079803373 | -0.005765617 | MAFG-AS1, MAFG        |
| chr17 | 65372852  | 65374598  | 1747 | * | 17 | 1.53946E-11 | 0.045549187 | 0.03606777  | 0.010526669 | -0.045404077 | -0.007160633 | PITPNC1               |
| chr6  | 46620240  | 46620935  | 696  | * | 14 | 8.93068E-09 | 0.279509947 | 0.036118591 | 0.083570013 | 0.025486266  | 0.003589076  | SLC25A27, CYP39A1     |
| chr2  | 176958174 | 176958552 | 379  | * | 2  | 1.50001E-07 | 0.006534964 | 0.03612083  | 0.011413956 | 0.038777461  | 0.034299074  | HOXD13                |
| chr19 | 45737208  | 45738115  | 908  | * | 10 | 1.93917E-10 | 0.051264051 | 0.036206333 | 0.014147878 | -0.143429123 | -0.051390875 | MARK4, EXOC3L2        |
| chr8  | 143781204 | 143781985 | 782  | * | 11 | 7.83468E-16 | 0.000963648 | 0.036213386 | 0.000776056 | -0.156754201 | -0.048980171 | LY6K                  |
| chr21 | 45502757  | 45503189  | 433  | * | 6  | 1.1484E-09  | 0.002293456 | 0.036238487 | 0.003224987 | 0.128341003  | 0.059854297  | TRAPPC10              |
| chr11 | 63953100  | 63953512  | 413  | * | 7  | 5.90914E-09 | 0.012486361 | 0.036258975 | 0.025319351 | -0.04822089  | -0.008868403 | STIP1                 |
| chr21 | 34392029  | 34392373  | 345  | * | 4  | 9.20146E-08 | 0.002126662 | 0.036332741 | 0.005246228 | 0.041425235  | 0.021910599  | AP000282.2            |
| chr10 | 86087566  | 86089017  | 1452 | * | 13 | 2.6242E-11  | 0.017732176 | 0.036364079 | 0.008336913 | -0.163086613 | -0.031225964 | CCSER2                |
| chr1  | 38260810  | 38261401  | 592  | * | 7  | 1.46806E-09 | 0.088973206 | 0.036421319 | 0.021510636 | 0.156295267  | 0.060885023  | MANEAL                |

|       |           |           |      |   |    |             |             |             |             |              |              |                       |
|-------|-----------|-----------|------|---|----|-------------|-------------|-------------|-------------|--------------|--------------|-----------------------|
| chr5  | 180650106 | 180651008 | 903  | * | 10 | 3.55499E-10 | 0.009103115 | 0.036477666 | 0.014443232 | -0.049950645 | -0.008418378 | TRIM41                |
| chr1  | 25070672  | 25072216  | 1545 | * | 16 | 1.90948E-12 | 0.532045126 | 0.036493493 | 0.120102998 | -0.056673463 | -0.010822214 | CLIC4                 |
| chr14 | 93798983  | 93799226  | 244  | * | 4  | 1.026E-08   | 0.035357831 | 0.036498541 | 0.014574971 | -0.046667115 | -0.023457239 | BTBD7                 |
| chr19 | 52692431  | 52693623  | 1193 | * | 15 | 2.2171E-12  | 0.106032365 | 0.036508769 | 0.016585887 | 0.043048107  | 0.011348758  | PPP2R1A               |
| chr3  | 50193049  | 50193465  | 417  | * | 3  | 2.35805E-09 | 0.001735207 | 0.036524898 | 0.004537314 | 0.065029513  | 0.038524305  | SEMA3F, RP11-493K19.3 |
| chr3  | 143690741 | 143692356 | 1616 | * | 19 | 5.04595E-15 | 0.012190105 | 0.036530308 | 0.009442604 | 0.039928477  | 0.003143248  | C3orf58               |
| chr19 | 41220765  | 41221198  | 434  | * | 8  | 2.54463E-08 | 0.030635298 | 0.036602455 | 0.0230262   | -0.03731362  | -0.007656442 | ADCK4                 |
| chr16 | 57837309  | 57837563  | 255  | * | 3  | 8.42434E-08 | 0.018068464 | 0.036625519 | 0.022687314 | 0.131653817  | 0.074340237  | CTD-260009.1, KIFC3   |
| chr17 | 71228270  | 71229370  | 1101 | * | 17 | 5.10425E-12 | 0.014547313 | 0.036663604 | 0.032658198 | -0.06893824  | -0.011346474 | C17orf80, FAM104A     |
| chr6  | 64345196  | 64345855  | 660  | * | 6  | 4.7316E-10  | 0.00474203  | 0.036671063 | 0.007283027 | 0.04402043   | -0.008083469 | PHF3                  |
| chr6  | 52284632  | 52285530  | 899  | * | 12 | 2.36104E-11 | 0.057991183 | 0.036694954 | 0.018913913 | -0.039074708 | 0.001227289  | EFHC1                 |
| chr17 | 27369764  | 27370117  | 354  | * | 6  | 1.30999E-08 | 0.058473964 | 0.036726957 | 0.020263438 | 0.121934526  | 0.052880369  | PIPOX                 |
| chr9  | 34611951  | 34612674  | 724  | * | 6  | 1.95414E-09 | 0.002312144 | 0.036733381 | 0.004321175 | -0.06013087  | -0.014317108 | RPP25L                |
| chr11 | 14522100  | 14522617  | 518  | * | 3  | 1.74602E-07 | 0.025540672 | 0.036734231 | 0.031516667 | 0.082046034  | 0.005301789  | PSMA1, PSMA1          |
| chr6  | 28834254  | 28834520  | 267  | * | 8  | 3.09192E-08 | 0.034404358 | 0.036743667 | 0.02352499  | -0.116805303 | -0.046059682 |                       |
| chr6  | 24911545  | 24912385  | 841  | * | 7  | 5.67676E-12 | 0.001942827 | 0.036750488 | 0.003829747 | 0.1612209    | 0.042216453  | FAM65B                |
| chr10 | 134599783 | 134600998 | 1216 | * | 25 | 1.13925E-14 | 0.133095416 | 0.036770948 | 0.065055046 | 0.096389753  | 0.002327041  |                       |
| chr12 | 50560469  | 50561215  | 747  | * | 7  | 6.78281E-10 | 0.003491658 | 0.0367899   | 0.003614515 | -0.065919745 | -0.018720297 | CERS5                 |
| chr6  | 138725556 | 138725872 | 317  | * | 3  | 1.15186E-07 | 0.011057517 | 0.036807171 | 0.016937408 | -0.065146571 | -0.029184452 | HEBP2                 |
| chr2  | 152954970 | 152956745 | 1776 | * | 17 | 1.93321E-11 | 0.063904034 | 0.036814254 | 0.012397103 | 0.103281395  | 0.005529508  | AC079790.2, CACNB4    |
| chr7  | 36764613  | 36765149  | 537  | * | 3  | 5.66855E-08 | 0.02516009  | 0.036981299 | 0.032789128 | 0.111396067  | -0.011937844 |                       |
| chr8  | 22550720  | 22551655  | 936  | * | 10 | 5.39472E-10 | 0.577352557 | 0.036987933 | 0.120229006 | 0.02886096   | -0.004909519 | RP11-459E5.1, EGR3    |
| chr19 | 33182526  | 33183187  | 662  | * | 6  | 3.73887E-10 | 0.00157009  | 0.037003084 | 0.001458837 | 0.042887222  | 0.006412931  | NUDT19, CTD-2538C1.2  |
| chr11 | 67275245  | 67276572  | 1328 | * | 18 | 8.51762E-14 | 0.047476246 | 0.03701889  | 0.007618374 | -0.10922185  | -0.018866396 | CDK2AP2               |
| chr20 | 44441124  | 44442019  | 896  | * | 13 | 8.79959E-13 | 0.014308214 | 0.037020247 | 0.010028366 | 0.132211775  | 0.009338202  | UBE2C                 |
| chr17 | 54230560  | 54230996  | 437  | * | 8  | 8.14841E-09 | 0.015194029 | 0.037088637 | 0.013662088 | 0.084354872  | 0.032976995  | ANKFN1                |
| chr1  | 231114438 | 231115458 | 1021 | * | 14 | 9.29589E-15 | 0.003138752 | 0.037094013 | 0.002029178 | -0.033538142 | 0.003279488  | ARV1, TTC13           |
| chr11 | 1781505   | 1781710   | 206  | * | 5  | 8.63577E-10 | 0.000350223 | 0.037134048 | 0.001436205 | -0.092991261 | -0.069896896 | AC068580.6, CTSD      |
| chr16 | 81526954  | 81527989  | 1036 | * | 8  | 3.39989E-09 | 0.023649569 | 0.03713912  | 0.020630613 | 0.12224415   | 0.053207211  | CMIP                  |



|       |           |           |      |   |    |             |             |             |             |              |              |                                     |
|-------|-----------|-----------|------|---|----|-------------|-------------|-------------|-------------|--------------|--------------|-------------------------------------|
| chr14 | 91579689  | 91580129  | 441  | * | 4  | 4.90637E-08 | 0.066493439 | 0.037163188 | 0.041913152 | 0.161502899  | 0.063463195  | C14orf159                           |
| chr6  | 30312580  | 30313517  | 938  | * | 30 | 2.24706E-12 | 0.90283418  | 0.037182754 | 0.536082389 | -0.055235869 | -0.004334799 | TRIM39-RPP21, RPP21                 |
| chr19 | 39137911  | 39138334  | 424  | * | 11 | 2.99977E-10 | 0.03652857  | 0.037203618 | 0.026351812 | -0.05047179  | -0.014475488 | ACTN4                               |
| chr3  | 37284959  | 37285071  | 113  | * | 3  | 8.06294E-09 | 0.028069234 | 0.037218694 | 0.021994918 | 0.01819335   | 0.005585106  | GOLGA4, RP11-259K5.2,<br>AC097359.1 |
| chr9  | 104295918 | 104296699 | 782  | * | 8  | 1.54067E-08 | 0.027480975 | 0.03723006  | 0.031037409 | -0.054377683 | 0.002073455  | RNF20                               |
| chr16 | 30007834  | 30008249  | 416  | * | 5  | 3.38477E-09 | 0.007570316 | 0.037244729 | 0.008056356 | -0.090121089 | -0.00950215  | INO80E                              |
| chr15 | 43662581  | 43663795  | 1215 | * | 10 | 1.17501E-08 | 0.023769692 | 0.037255661 | 0.011593381 | -0.05961519  | -0.005844545 | TUBGCP4, ZSCAN29                    |
| chr15 | 40762407  | 40763763  | 1357 | * | 12 | 8.8666E-13  | 0.004704676 | 0.037301872 | 0.001587711 | 0.0832924    | -0.006741194 | CHST14                              |
| chr20 | 19915682  | 19916159  | 478  | * | 8  | 2.73018E-11 | 0.003222211 | 0.0373187   | 0.002755074 | 0.130753813  | 0.046953109  | RIN2                                |
| chr19 | 1605171   | 1606356   | 1186 | * | 12 | 7.41767E-17 | 1.43758E-05 | 0.037346924 | 3.60824E-05 | 0.032550033  | 0.003843715  | UQCR11, UQCR11                      |
| chr15 | 91497863  | 91498269  | 407  | * | 8  | 3.25958E-09 | 0.166483633 | 0.037351239 | 0.022108092 | -0.062272379 | -0.001272774 | RCCD1, AC068831.6                   |
| chr16 | 85645571  | 85647010  | 1440 | * | 13 | 8.23336E-14 | 0.182907792 | 0.037370224 | 0.013294268 | -0.038383613 | 0.004131831  | GSE1                                |
| chr1  | 176175820 | 176177166 | 1347 | * | 13 | 1.48032E-10 | 0.135757748 | 0.037375663 | 0.021779262 | 0.03015269   | 0.002958462  | RP11-195C7.1, RFWD2                 |
| chr15 | 44092166  | 44093429  | 1264 | * | 17 | 1.82648E-14 | 0.303771706 | 0.037417322 | 0.010642757 | -0.092991291 | -0.020829538 | SERF2, HYPK, SERINC4                |
| chr6  | 97345342  | 97346406  | 1065 | * | 14 | 9.3822E-13  | 0.001666553 | 0.037432563 | 0.00541273  | -0.058800241 | -0.008856473 | NDUFAF4                             |
| chr1  | 38478221  | 38479228  | 1008 | * | 13 | 3.92172E-10 | 0.032303855 | 0.037432698 | 0.028665254 | 0.05213961   | 0.001449589  | UTP11L                              |
| chr21 | 43815685  | 43816355  | 671  | * | 7  | 6.54355E-09 | 0.017359568 | 0.037496413 | 0.013326498 | 0.124480167  | 0.046360017  | TMPRSS3                             |
| chr16 | 69373666  | 69373701  | 36   | * | 5  | 1.20233E-07 | 0.011190687 | 0.037581454 | 0.01638964  | 0.020163349  | 0.001693463  | NIP7, RP11-343C2.9, RP11-343C2.7    |
| chr6  | 28367070  | 28367885  | 816  | * | 9  | 1.54633E-11 | 0.000560001 | 0.037603972 | 0.00216016  | 0.104992908  | 0.04481878   | ZSCAN12                             |
| chr2  | 191208002 | 191208694 | 693  | * | 9  | 6.97112E-10 | 0.033571974 | 0.037607801 | 0.011746387 | -0.098237816 | -0.001016029 | INPP1, HIBCH                        |
| chr1  | 6845033   | 6845440   | 408  | * | 11 | 2.32491E-08 | 0.037613851 | 0.037609736 | 0.057041503 | -0.1517133   | -0.021031722 | CAMTA1                              |
| chr1  | 11713643  | 11714269  | 627  | * | 6  | 6.5464E-09  | 0.003367919 | 0.037640046 | 0.004280027 | 0.208323544  | 0.071477724  | FBXO2                               |
| chr3  | 185655795 | 185656291 | 497  | * | 9  | 3.6134E-11  | 0.0167531   | 0.037640841 | 0.007013189 | -0.161303961 | -0.038046358 | TRA2B                               |
| chr3  | 179754239 | 179755696 | 1458 | * | 11 | 3.2081E-10  | 0.002111754 | 0.037642762 | 0.002595007 | -0.152860144 | -0.004171912 | PEX5L                               |
| chr2  | 120770681 | 120771169 | 489  | * | 7  | 2.94513E-09 | 0.111984589 | 0.037675003 | 0.031746827 | 0.031128259  | 0.003947777  | EPB41L5                             |
| chr18 | 19749138  | 19749540  | 403  | * | 6  | 2.76222E-08 | 0.012335282 | 0.037694252 | 0.013771342 | 0.029791168  | 0.00575174   | GATA6                               |
| chr1  | 200271765 | 200272215 | 451  | * | 4  | 5.12148E-09 | 0.022466914 | 0.037697274 | 0.018475961 | 0.199433425  | 0.104402601  |                                     |
| chr16 | 66582592  | 66583237  | 646  | * | 5  | 2.73665E-09 | 0.001221344 | 0.037786824 | 0.003399989 | 0.11915563   | 0.026637944  | Y_RNA, TK2                          |
| chr16 | 8738240   | 8738608   | 369  | * | 6  | 8.75786E-11 | 0.00017478  | 0.037794133 | 0.000735247 | -0.104613259 | -0.078204609 | METTL22                             |

|       |           |           |      |   |    |             |             |             |             |              |              |                                                  |
|-------|-----------|-----------|------|---|----|-------------|-------------|-------------|-------------|--------------|--------------|--------------------------------------------------|
| chr1  | 46806025  | 46807522  | 1498 | * | 17 | 1.53749E-14 | 0.003500478 | 0.037810141 | 0.003214777 | -0.121382452 | -0.014024159 | NSUN4                                            |
| chr4  | 56412099  | 56412880  | 782  | * | 8  | 5.3816E-10  | 0.006541396 | 0.037851745 | 0.004601685 | -0.042620725 | -0.003365076 | CLOCK                                            |
| chr16 | 31105482  | 31106703  | 1222 | * | 11 | 1.76647E-09 | 0.057929495 | 0.037881207 | 0.015761658 | -0.054282592 | -0.006148999 | RP11-196G11.1, VKORC1                            |
| chr22 | 42466345  | 42467252  | 908  | * | 11 | 4.67055E-13 | 0.003459801 | 0.037934465 | 0.002968748 | -0.071940721 | -0.011065921 | NAGA                                             |
| chr11 | 94963991  | 94964817  | 827  | * | 10 | 5.05583E-09 | 0.031131386 | 0.037960387 | 0.028766309 | -0.110544361 | -0.017207495 | RP11-712B9.2, SESN3                              |
| chr1  | 26869340  | 26869637  | 298  | * | 4  | 6.00175E-09 | 0.000501318 | 0.038059824 | 0.001943376 | -0.08033882  | -0.058057215 | RPS6KA1                                          |
| chr12 | 118541585 | 118542254 | 670  | * | 7  | 3.69227E-09 | 0.006535319 | 0.038087789 | 0.006132103 | -0.056453053 | -0.007799888 | VSIG10                                           |
| chr1  | 3663832   | 3664084   | 253  | * | 5  | 9.0071E-08  | 0.026827944 | 0.038095283 | 0.030604221 | 0.034877313  | 0.008424853  | TP73-AS1                                         |
| chr14 | 67707842  | 67708475  | 634  | * | 9  | 7.49961E-10 | 0.099228038 | 0.038101557 | 0.031324048 | -0.064591177 | -0.015120368 | MPP5                                             |
| chr22 | 19709548  | 19710386  | 839  | * | 8  | 1.99607E-09 | 0.012438045 | 0.038108491 | 0.01348825  | 0.23914199   | 0.095478976  | SEPT5                                            |
| chr16 | 2932470   | 2932616   | 147  | * | 4  | 1.4928E-08  | 0.011513917 | 0.038131592 | 0.016305691 | -0.061892127 | -0.01160315  |                                                  |
| chr9  | 95431707  | 95432460  | 754  | * | 4  | 1.10542E-08 | 0.055600793 | 0.038167841 | 0.033874715 | 0.027448797  | 0.010807581  | IPPK                                             |
| chr9  | 111695968 | 111696342 | 375  | * | 2  | 3.28544E-08 | 0.038437158 | 0.038216106 | 0.039705825 | 0.020744937  | 0.012794228  | IKBKAP                                           |
| chr4  | 6642252   | 6643729   | 1478 | * | 11 | 1.29819E-14 | 7.52168E-05 | 0.038229494 | 0.000526756 | -0.04801105  | -0.008463787 | MRFAP1                                           |
| chr2  | 38152187  | 38152364  | 178  | * | 7  | 1.09744E-07 | 0.055606222 | 0.038240933 | 0.042555694 | -0.048080554 | -0.003015688 | RMDN2                                            |
| chr7  | 65419185  | 65419261  | 77   | * | 6  | 1.5638E-11  | 8.5585E-05  | 0.038258778 | 0.000585688 | 0.142627543  | 0.114846688  | VKORC1L1                                         |
| chr10 | 38299179  | 38299886  | 708  | * | 11 | 2.3418E-10  | 0.073619792 | 0.038313048 | 0.015160617 | -0.065640694 | -0.006334431 | ZNF33A                                           |
| chr4  | 129732568 | 129733057 | 490  | * | 7  | 1.5521E-08  | 0.126502954 | 0.038354799 | 0.048623223 | -0.04237184  | 0.001881397  | JADE1                                            |
| chr7  | 27190235  | 27191564  | 1330 | * | 12 | 2.01831E-10 | 0.064875323 | 0.038392371 | 0.009377004 | 0.057099054  | 0.023340448  | HOXA-AS3, HOXA3, RP1-170O19.22,<br>RP1-170O19.23 |
| chr22 | 36682843  | 36683020  | 178  | * | 5  | 9.85487E-09 | 0.001160346 | 0.038421187 | 0.003706336 | 0.083300572  | 0.046076986  | MYH9                                             |
| chr12 | 123463762 | 123464655 | 894  | * | 10 | 1.36041E-11 | 0.045121218 | 0.038439855 | 0.012247056 | 0.076250171  | 0.030167774  | OGFOD2, RP11-197N18.2, ARL6IP4,<br>ABCB9         |
| chr15 | 51633816  | 51633821  | 6    | * | 2  | 2.02198E-07 | 0.116881999 | 0.038448886 | 0.068558652 | 0.107395941  | 0.063302535  |                                                  |
| chr17 | 27053969  | 27054058  | 90   | * | 4  | 1.91001E-07 | 0.005809205 | 0.03853779  | 0.012259406 | 0.021442607  | 0.015455074  | NEK8, TLCD1                                      |
| chr1  | 150981652 | 150981947 | 296  | * | 2  | 4.52385E-08 | 0.403292523 | 0.038542359 | 0.093577563 | 0.133960865  | 0.065750834  | PRUNE                                            |
| chr7  | 50823767  | 50823908  | 142  | * | 3  | 7.7638E-08  | 0.002451277 | 0.038564052 | 0.005912266 | 0.102111549  | 0.080277337  | GRB10                                            |
| chr1  | 145039193 | 145040057 | 865  | * | 8  | 2.51942E-11 | 0.000699332 | 0.038607235 | 0.001986741 | 0.037005839  | 0.008624969  | PDE4DIP                                          |
| chr15 | 44719213  | 44719665  | 453  | * | 6  | 2.05931E-08 | 0.020356331 | 0.038618621 | 0.011175744 | -0.078237279 | -0.034898904 | CTDSPL2, RP11-516C1.1                            |
| chr3  | 125802485 | 125803306 | 822  | * | 9  | 2.63974E-09 | 0.012271526 | 0.03877887  | 0.011767693 | -0.026728512 | -0.002808021 | RP11-124N2.1, SLC41A3                            |
| chr11 | 58909927  | 58910583  | 657  | * | 18 | 3.55702E-10 | 0.276312356 | 0.038781854 | 0.070528486 | 0.036736756  | -0.002799283 | FAM111A, AP001258.4, AP001258.5                  |

|       |           |           |      |   |    |             |             |             |             |              |              |                                    |
|-------|-----------|-----------|------|---|----|-------------|-------------|-------------|-------------|--------------|--------------|------------------------------------|
| chr5  | 149379650 | 149380356 | 707  | * | 14 | 8.88884E-10 | 0.080219728 | 0.03878334  | 0.051062161 | -0.041095667 | -0.003768274 | HMGXB3, TIGD6                      |
| chr10 | 121355708 | 121357240 | 1533 | * | 13 | 3.22822E-16 | 0.005672815 | 0.038840954 | 0.001055671 | -0.055651092 | -0.000448166 | TIAL1                              |
| chr16 | 46781713  | 46782760  | 1048 | * | 9  | 8.38538E-11 | 0.002696617 | 0.038844883 | 0.006027507 | 0.182650898  | 0.069145177  | MYLK3                              |
| chr2  | 162016459 | 162017589 | 1131 | * | 12 | 8.84555E-12 | 0.021671746 | 0.038868817 | 0.00548194  | -0.072331984 | -0.006696479 | TANK, AC009313.1                   |
| chr9  | 35689475  | 35690395  | 921  | * | 8  | 7.27186E-12 | 0.004031134 | 0.038916462 | 0.001641889 | 0.187294263  | 0.048394526  | TPM2                               |
| chr6  | 29910755  | 29911558  | 804  | * | 9  | 1.00503E-10 | 0.017994365 | 0.03900205  | 0.004078773 | 0.224863359  | 0.049437587  | HLA-A, HCG4P5                      |
| chr11 | 124622317 | 124622775 | 459  | * | 5  | 9.43809E-08 | 0.020687923 | 0.039019595 | 0.011965914 | 0.107039759  | 0.029645437  | ESAM                               |
| chr6  | 112041092 | 112041335 | 244  | * | 4  | 4.4549E-08  | 0.003912546 | 0.039082557 | 0.00846162  | 0.049623004  | 0.043939117  | FYN                                |
| chr1  | 45240400  | 45241824  | 1425 | * | 14 | 2.83836E-14 | 0.039325472 | 0.039119889 | 0.003924041 | -0.109074761 | -0.01487493  | RPS8, SNORD55, RP11-269F19.2       |
| chr20 | 62886751  | 62887006  | 256  | * | 6  | 2.59983E-08 | 0.049834058 | 0.039173679 | 0.01569806  | -0.099241413 | -0.016720272 |                                    |
| chr5  | 115152326 | 115153252 | 927  | * | 13 | 9.47043E-15 | 0.010803638 | 0.039261733 | 0.002074453 | 0.067351364  | 0.018872262  | CDO1                               |
| chr8  | 97273336  | 97274070  | 735  | * | 11 | 1.32663E-09 | 0.10790394  | 0.039274045 | 0.053679092 | -0.052139583 | 0.000655733  | PTDSS1, MTERFD1                    |
| chr13 | 111364847 | 111368529 | 3683 | * | 33 | 1.31786E-15 | 0.000331726 | 0.039286302 | 0.001167503 | -0.067346039 | -0.017775523 | ING1, CARS2                        |
| chr19 | 46273153  | 46273434  | 282  | * | 3  | 6.60019E-09 | 0.006395759 | 0.039325712 | 0.012647677 | -0.02485655  | 0.001216686  | AC074212.6, DMPK                   |
| chr22 | 42896426  | 42897250  | 825  | * | 7  | 3.82777E-10 | 0.031348068 | 0.039348731 | 0.01766868  | 0.070777222  | 0.018532144  | SERHL                              |
| chr19 | 38039469  | 38039666  | 198  | * | 2  | 8.64362E-08 | 0.006499019 | 0.039414299 | 0.011644079 | -0.164700642 | -0.164273173 | ZNF793, CTD-3064H18.4              |
| chr7  | 100463206 | 100464145 | 940  | * | 7  | 1.18302E-09 | 0.002351723 | 0.039425898 | 0.006681661 | -0.107528541 | -0.062240413 | SLC12A9                            |
| chr12 | 133066471 | 133067405 | 935  | * | 14 | 9.45183E-13 | 0.007665879 | 0.039507377 | 0.014023047 | -0.080319359 | -0.03236126  | FBRSL1                             |
| chr1  | 234349253 | 234350515 | 1263 | * | 9  | 7.43546E-13 | 7.08666E-06 | 0.039517861 | 0.000107592 | -0.112942064 | -0.02791948  | SLC35F3, RP4-799P18.2              |
| chr2  | 62932096  | 62933278  | 1183 | * | 11 | 5.15723E-13 | 0.000540612 | 0.039518962 | 0.001819025 | -0.115066334 | -0.032593367 | EHBP1                              |
| chr2  | 203130903 | 203130955 | 53   | * | 2  | 1.25605E-07 | 0.19054898  | 0.039524913 | 0.082289635 | -0.018160471 | -0.00087079  | NOP58                              |
| chr1  | 226012500 | 226013212 | 713  | * | 7  | 6.3975E-11  | 0.019318682 | 0.039567514 | 0.004649596 | 0.121159934  | 0.050990618  | EPHX1                              |
| chr11 | 32454718  | 32455025  | 308  | * | 7  | 6.03792E-08 | 0.007993948 | 0.039568565 | 0.017782989 | 0.08328982   | 0.034572814  | WT1                                |
| chr1  | 154973402 | 154973945 | 544  | * | 4  | 3.15067E-08 | 0.002741536 | 0.039597887 | 0.006400075 | 0.020835285  | 0.008130385  |                                    |
| chr1  | 75596930  | 75597304  | 375  | * | 2  | 7.69382E-08 | 0.011775264 | 0.039611164 | 0.018385642 | 0.023349272  | 0.017420072  | LHX8, RP11-510C10.2, RP11-510C10.3 |
| chr11 | 69489591  | 69490221  | 631  | * | 7  | 5.35545E-09 | 0.805610465 | 0.039641164 | 0.139460053 | 0.024837348  | 0.005894348  | ORAOV1                             |
| chr17 | 7209803   | 7211307   | 1505 | * | 19 | 1.43586E-17 | 0.000922095 | 0.039641534 | 0.00067371  | -0.12285127  | -0.022509225 | EIF5A                              |
| chr6  | 119255801 | 119256453 | 653  | * | 5  | 7.07977E-09 | 0.010534055 | 0.03967358  | 0.013718637 | -0.052764337 | -0.000851336 | RP11-351A11.1, MCM9                |
| chr4  | 83955829  | 83956648  | 820  | * | 13 | 2.26751E-10 | 0.021874711 | 0.039679217 | 0.0245203   | -0.032724374 | -0.005483294 | COPS4                              |

|       |           |           |      |   |    |             |             |             |             |              |              |                       |
|-------|-----------|-----------|------|---|----|-------------|-------------|-------------|-------------|--------------|--------------|-----------------------|
| chr17 | 61778366  | 61778813  | 448  | * | 4  | 1.37347E-09 | 0.000313666 | 0.039770232 | 0.001460034 | 0.070694473  | 0.051559855  | LIMD2                 |
| chr6  | 39082812  | 39083205  | 394  | * | 9  | 3.3887E-08  | 0.075294098 | 0.039801732 | 0.0325553   | 0.080279027  | 0.024336725  | SAYSD1                |
| chr10 | 114709137 | 114710261 | 1125 | * | 10 | 3.38398E-10 | 0.023489697 | 0.039818563 | 0.020464753 | -0.255586627 | -0.040981067 | TCF7L2                |
| chr5  | 79783132  | 79784454  | 1323 | * | 13 | 1.0586E-14  | 0.012412569 | 0.039898354 | 0.003994984 | -0.084161691 | -0.011310612 | FAM151B, CTD-2015H6.3 |
| chr8  | 26148993  | 26149300  | 308  | * | 4  | 1.51544E-07 | 0.011678284 | 0.039903288 | 0.015103306 | 0.01546114   | 0.003856399  | PPP2R2A               |
| chr11 | 61128853  | 61130361  | 1509 | * | 22 | 8.6516E-13  | 0.116909438 | 0.039953239 | 0.017739505 | 0.058814906  | 0.005529882  | TMEM138, CYB561A3     |
| chr3  | 158390329 | 158391040 | 712  | * | 12 | 3.40476E-09 | 0.058744475 | 0.039996225 | 0.03556307  | -0.040006235 | -0.019602842 | GFM1, LXN             |
| chr17 | 79283028  | 79283959  | 932  | * | 11 | 9.29473E-11 | 0.008912164 | 0.040034617 | 0.013834177 | -0.132685376 | -0.047257153 | LINC00482             |
| chr5  | 76932526  | 76933163  | 638  | * | 4  | 1.29641E-08 | 0.002274472 | 0.040044992 | 0.005734552 | 0.042881254  | 0.015072365  | OTP                   |
| chr15 | 41708714  | 41709524  | 811  | * | 9  | 6.06167E-10 | 0.011403001 | 0.040047814 | 0.012291455 | 0.031475747  | 0.012866565  | RTF1                  |
| chr1  | 24017943  | 24018676  | 734  | * | 11 | 4.69732E-09 | 0.017935242 | 0.040047937 | 0.026565128 | 0.037927016  | 0.005517795  | RPL11                 |
| chr2  | 179059440 | 179059452 | 13   | * | 2  | 7.02082E-08 | 0.007360877 | 0.040050501 | 0.012903176 | 0.02012736   | 0.017178805  | OSBPL6                |
| chr6  | 30611822  | 30611830  | 9    | * | 2  | 1.81416E-07 | 0.039706965 | 0.040064279 | 0.041416883 | 0.069780575  | 0.049462487  | ATAT1                 |
| chr7  | 100209537 | 100210548 | 1012 | * | 16 | 8.58024E-13 | 0.019564846 | 0.040072841 | 0.008383758 | -0.060493047 | -0.012626728 | MOSPD3                |
| chr14 | 91976141  | 91976961  | 821  | * | 16 | 8.08768E-12 | 0.063749917 | 0.040143292 | 0.022811368 | -0.068147197 | -0.010263119 | SMEK1                 |
| chr1  | 153700021 | 153700650 | 630  | * | 9  | 2.24641E-11 | 0.000534463 | 0.040169217 | 0.001901986 | -0.043582438 | -0.005626701 | INTS3                 |
| chr3  | 52812361  | 52813920  | 1560 | * | 13 | 1.24152E-10 | 0.014904655 | 0.040178077 | 0.002989133 | -0.138380313 | -0.0373427   | ITIH1                 |
| chr10 | 74856286  | 74856747  | 462  | * | 6  | 3.04038E-08 | 0.00205145  | 0.04027261  | 0.006838159 | -0.032644687 | 0.005120092  | P4HA1                 |
| chr17 | 38573776  | 38575162  | 1387 | * | 19 | 5.49873E-12 | 0.062487147 | 0.040322723 | 0.038364274 | -0.041193466 | -0.011407944 | TOP2A                 |
| chr8  | 23562918  | 23563970  | 1053 | * | 7  | 4.53301E-12 | 0.02380541  | 0.040334822 | 0.020735893 | 0.114527806  | 0.042763348  | NKX2-6                |
| chr1  | 144931754 | 144932609 | 856  | * | 14 | 1.02717E-09 | 0.202922755 | 0.040377265 | 0.053589356 | 0.016918312  | 0.004058195  | PDE4DIP               |
| chr19 | 384036    | 384408    | 373  | * | 4  | 1.69411E-08 | 0.000384473 | 0.040409264 | 0.001702723 | 0.13081048   | 0.081058449  |                       |
| chr19 | 13905866  | 13906241  | 376  | * | 6  | 5.2621E-10  | 0.000391917 | 0.04042751  | 0.001643002 | -0.044111559 | -0.011832012 |                       |
| chr7  | 72972103  | 72972737  | 635  | * | 13 | 9.64545E-10 | 0.415481897 | 0.040455871 | 0.05696582  | 0.162112597  | 0.040355472  | BCL7B                 |
| chr6  | 31275148  | 31276669  | 1522 | * | 25 | 4.54748E-17 | 0.03757281  | 0.040518321 | 0.012900888 | 0.135838643  | 0.058405882  | XXbac-BPG248L24.10    |
| chr7  | 66309627  | 66310092  | 466  | * | 8  | 5.78569E-09 | 0.037155281 | 0.040529041 | 0.014598457 | 0.017149263  | 0.008035106  | GTF2IRD1P1            |
| chr19 | 2785107   | 2785891   | 785  | * | 10 | 6.03619E-10 | 0.004255457 | 0.040559555 | 0.009268731 | -0.05762004  | -0.000513083 | THOP1                 |
| chr4  | 184426031 | 184427252 | 1222 | * | 10 | 8.77973E-14 | 0.006620161 | 0.040575576 | 0.002514846 | -0.047655221 | -0.004941876 | ING2                  |
| chr3  | 14219389  | 14220835  | 1447 | * | 22 | 4.7934E-10  | 0.180993462 | 0.040583626 | 0.073805172 | -0.133063243 | -0.006980922 | LSM3, XPC             |

|       |           |           |      |   |    |             |             |             |             |              |              |                             |
|-------|-----------|-----------|------|---|----|-------------|-------------|-------------|-------------|--------------|--------------|-----------------------------|
| chr8  | 101225028 | 101225902 | 875  | * | 8  | 3.38986E-09 | 0.005312493 | 0.040600518 | 0.006476006 | 0.030783848  | 0.004363938  | SPAG1                       |
| chr1  | 201798408 | 201798459 | 52   | * | 3  | 1.38721E-07 | 0.003521936 | 0.040634962 | 0.007759487 | -0.01871956  | -0.007355857 | IPO9, IPO9-AS1              |
| chr19 | 46998786  | 46999840  | 1055 | * | 15 | 1.18833E-09 | 0.075854835 | 0.040636273 | 0.059184181 | 0.144850766  | 0.029368169  | AC011484.1, PPP5D1, PNMAL2  |
| chr18 | 18691651  | 18692338  | 688  | * | 13 | 2.25953E-09 | 0.153389906 | 0.040671112 | 0.036454641 | -0.055006692 | -0.016335439 | ROCK1                       |
| chr12 | 53835350  | 53836318  | 969  | * | 8  | 1.37792E-12 | 0.012552144 | 0.040694605 | 0.004446977 | -0.116176763 | -0.027070436 | PRR13, PCBP2, RP11-793H13.8 |
| chr2  | 62422633  | 62423716  | 1084 | * | 9  | 1.47092E-11 | 0.00150902  | 0.040696739 | 0.001006769 | -0.04558989  | -0.007686829 | B3GNT2                      |
| chr13 | 110790566 | 110791045 | 480  | * | 4  | 7.12078E-08 | 0.064243325 | 0.040742049 | 0.037839277 | -0.045291368 | -0.006476786 |                             |
| chr17 | 40760955  | 40761818  | 864  | * | 21 | 1.51694E-19 | 0.002867318 | 0.040762729 | 0.001148976 | 0.027626307  | -0.000913805 | TUBG1, FAM134C              |
| chr1  | 226069919 | 226071128 | 1210 | * | 15 | 6.7966E-13  | 0.009132597 | 0.04077084  | 0.012513409 | -0.132459712 | -0.009345386 | TMEM63A                     |
| chr10 | 81106469  | 81107211  | 743  | * | 10 | 8.10946E-09 | 0.209360802 | 0.040809051 | 0.060552039 | 0.145694039  | 0.019651365  |                             |
| chr16 | 73082051  | 73082535  | 485  | * | 6  | 4.50223E-10 | 0.001319714 | 0.040819108 | 0.004261063 | 0.029441356  | 0.01445465   | ZFH3                        |
| chr19 | 14247862  | 14248428  | 567  | * | 5  | 6.5698E-09  | 0.015426462 | 0.04082242  | 0.019364151 | -0.035096803 | -0.012430358 | CTB-55O6.12                 |
| chr11 | 61658919  | 61659716  | 798  | * | 10 | 3.71339E-10 | 0.020906407 | 0.040896375 | 0.006506066 | 0.07678432   | 0.009767994  | FADS3                       |
| chr14 | 23388339  | 23388846  | 508  | * | 10 | 2.46837E-08 | 0.225367086 | 0.040966094 | 0.052470921 | 0.038787941  | 0.004837894  | PRMT5-AS1, RBM23            |
| chr4  | 1796142   | 1796226   | 85   | * | 2  | 4.39592E-08 | 0.012701369 | 0.041027616 | 0.019671438 | -0.017981241 | -0.013121474 | FGFR3                       |
| chr18 | 60987425  | 60987446  | 22   | * | 4  | 3.78643E-08 | 0.327730289 | 0.041047012 | 0.167766482 | 0.023152813  | 0.005378091  |                             |
| chr9  | 6757347   | 6758935   | 1589 | * | 18 | 1.31524E-18 | 0.006992661 | 0.041092768 | 0.001051167 | -0.038869791 | 0.003734748  | KDM4C                       |
| chr17 | 37353483  | 37353657  | 175  | * | 2  | 6.26561E-08 | 0.008358185 | 0.041125428 | 0.014356407 | -0.082394042 | -0.06157833  | CACNB1                      |
| chr3  | 119298195 | 119298802 | 608  | * | 10 | 2.47076E-08 | 0.065894467 | 0.041137868 | 0.039446257 | -0.061169027 | 0.004128791  | ADPRH, RP11-190C22.9        |
| chr19 | 38146906  | 38147309  | 404  | * | 5  | 3.93457E-08 | 0.014684035 | 0.04114706  | 0.017265285 | 0.051430247  | 0.016306403  | ZFP30                       |
| chr5  | 43603643  | 43603786  | 144  | * | 2  | 3.46961E-08 | 0.043408727 | 0.041203286 | 0.044215702 | -0.251403668 | -0.131118498 | NNT                         |
| chr1  | 245026373 | 245027404 | 1032 | * | 8  | 1.19035E-09 | 0.049357334 | 0.041207187 | 0.03363411  | -0.083742722 | -0.018661233 | HNRNPU                      |
| chr8  | 28243821  | 28244474  | 654  | * | 12 | 2.64925E-09 | 0.205592248 | 0.041255276 | 0.053273523 | -0.040295058 | -0.005213623 | ZNF395, FBXO16              |
| chr16 | 29801824  | 29802448  | 625  | * | 12 | 3.2981E-08  | 0.301590002 | 0.041282665 | 0.096288953 | -0.03377748  | -0.0120238   | KIF22                       |
| chr10 | 131935156 | 131935477 | 322  | * | 3  | 2.16063E-08 | 0.042607798 | 0.04131779  | 0.033730276 | 0.045874039  | 0.015754922  | GLRX3                       |
| chr10 | 75758046  | 75758501  | 456  | * | 4  | 1.10791E-10 | 0.000430592 | 0.041329876 | 0.001846681 | 0.035313924  | 0.010594267  | VCL                         |
| chr14 | 24615978  | 24616620  | 643  | * | 7  | 2.72657E-09 | 0.003963885 | 0.041335084 | 0.009424198 | -0.047863357 | -0.00623091  | RNF31, PSME2                |
| chr2  | 62115351  | 62116013  | 663  | * | 11 | 1.26421E-11 | 0.003851171 | 0.041341711 | 0.003737604 | 0.018374941  | 0.006975754  | COMMD1, CCT4                |
| chr12 | 54891213  | 54891655  | 443  | * | 5  | 1.13346E-09 | 0.000378714 | 0.041384211 | 0.001818882 | -0.078950294 | -0.038605692 | RP11-753H16.3, NCKAP1L      |

|       |           |           |      |   |    |             |             |             |             |              |              |                            |
|-------|-----------|-----------|------|---|----|-------------|-------------|-------------|-------------|--------------|--------------|----------------------------|
| chr11 | 46615999  | 46616039  | 41   | * | 2  | 9.27326E-08 | 0.59593492  | 0.041425207 | 0.102006108 | -0.096148262 | -0.048599406 |                            |
| chr13 | 31735875  | 31736727  | 853  | * | 16 | 2.99244E-13 | 0.006690755 | 0.041469588 | 0.008284553 | 0.043986868  | 0.002659409  | HSPH1                      |
| chr14 | 35008661  | 35009852  | 1192 | * | 11 | 8.16584E-11 | 0.00142182  | 0.041475235 | 0.003451233 | 0.141814847  | 0.024306907  | EAPP                       |
| chr5  | 16465883  | 16466296  | 414  | * | 7  | 4.30548E-08 | 0.006642849 | 0.041525252 | 0.011004034 | 0.05376709   | 0.007174609  | ZNF622                     |
| chr19 | 50433262  | 50433949  | 688  | * | 4  | 1.25248E-09 | 0.003431528 | 0.041526886 | 0.006324899 | 0.085303081  | 0.028824189  | ATF5, CTC-326K19.6         |
| chr15 | 68522224  | 68522275  | 52   | * | 3  | 1.95698E-07 | 0.047285096 | 0.041533319 | 0.029676564 | -0.049620926 | -0.014427109 | CLN6                       |
| chr19 | 1940184   | 1940655   | 472  | * | 5  | 7.63046E-08 | 0.022121054 | 0.041534288 | 0.010988879 | 0.02280799   | 0.007172837  |                            |
| chr10 | 98479703  | 98480746  | 1044 | * | 11 | 3.29438E-12 | 0.026522941 | 0.041535084 | 0.012263631 | 0.024436503  | 0.012302466  | PIK3AP1                    |
| chr11 | 66383678  | 66384451  | 774  | * | 10 | 4.04901E-11 | 0.002919344 | 0.041550151 | 0.004306361 | -0.052972582 | 0.000348148  | RBM14, RBM4, RBM14-RBM4    |
| chr2  | 209119250 | 209120308 | 1059 | * | 11 | 4.62181E-13 | 0.001597118 | 0.041564107 | 0.002606959 | -0.05400604  | -0.002624972 | IDH1-AS1, IDH1             |
| chr1  | 180600890 | 180601918 | 1029 | * | 10 | 1.03E-12    | 0.000781435 | 0.041673829 | 0.002368108 | -0.081501908 | -0.012387048 | XPR1                       |
| chr10 | 14051445  | 14051679  | 235  | * | 4  | 4.7893E-09  | 0.005364634 | 0.041677437 | 0.012249352 | 0.26342692   | 0.199479126  | FRMD4A                     |
| chr2  | 208030666 | 208032061 | 1396 | * | 14 | 4.37384E-14 | 0.003993817 | 0.041707393 | 0.003296655 | 0.034459041  | 0.001295389  | KLF7                       |
| chr12 | 112450556 | 112451600 | 1045 | * | 14 | 9.30496E-09 | 0.011023952 | 0.041713834 | 0.021942594 | -0.026238222 | 0.001262107  | ERP29, TMEM116             |
| chr12 | 113622691 | 113623594 | 904  | * | 11 | 1.52597E-09 | 0.234827669 | 0.04173945  | 0.040021376 | 0.029367339  | 0.003191507  | RITA1, DDX54, RP11-545P7.4 |
| chr10 | 104263472 | 104263948 | 477  | * | 9  | 4.59508E-08 | 0.034791553 | 0.041740122 | 0.029388131 | -0.038999888 | -0.001687965 | SUFU                       |
| chr6  | 127836731 | 127837030 | 300  | * | 2  | 4.07548E-09 | 0.085803011 | 0.041755922 | 0.063334129 | -0.095532243 | -0.04284665  | SOGA3, SOGA3               |
| chr11 | 18548210  | 18549289  | 1080 | * | 16 | 2.93023E-11 | 0.031938481 | 0.041782613 | 0.02838896  | 0.076492194  | 0.003144305  | TSG101                     |
| chr12 | 51157902  | 51158154  | 253  | * | 3  | 2.07499E-08 | 0.002525714 | 0.041866348 | 0.006381778 | -0.043683476 | -0.012611616 | ATF1                       |
| chr1  | 64058180  | 64059385  | 1206 | * | 19 | 1.41603E-13 | 0.112311932 | 0.041900388 | 0.019942382 | -0.08481482  | -0.014075182 | PGM1, ITGB3BP              |
| chr12 | 53661219  | 53661577  | 359  | * | 2  | 6.8188E-08  | 0.063291935 | 0.041956694 | 0.054787374 | -0.074801596 | -0.055750046 |                            |
| chr6  | 3064047   | 3064805   | 759  | * | 7  | 5.21332E-09 | 0.007857652 | 0.041958904 | 0.008766936 | 0.03141731   | 0.009109017  | RIPK1                      |
| chr6  | 130339410 | 130339826 | 417  | * | 9  | 3.50642E-08 | 0.018417118 | 0.041993017 | 0.027684324 | 0.023221338  | 0.006013943  | L3MBTL3                    |
| chr17 | 27181725  | 27182137  | 413  | * | 8  | 3.84911E-08 | 0.486543095 | 0.042059154 | 0.100053963 | -0.052726608 | -0.013577053 | ERAL1, FAM222B             |
| chr12 | 6419136   | 6419784   | 649  | * | 11 | 2.88034E-12 | 0.140788013 | 0.042096351 | 0.02440555  | 0.191779954  | 0.051622024  | PLEKHG6                    |
| chr19 | 49223814  | 49224165  | 352  | * | 5  | 2.08259E-08 | 0.002966716 | 0.042097211 | 0.00677379  | -0.107585969 | -0.078011588 | RASIP1                     |
| chr1  | 167905194 | 167906565 | 1372 | * | 20 | 4.19174E-17 | 0.011534697 | 0.042105105 | 0.008021552 | -0.054819855 | -0.003752307 | DCAF6, MPC2                |
| chr2  | 182321269 | 182322898 | 1630 | * | 16 | 5.78665E-09 | 0.041493413 | 0.042134349 | 0.007988959 | -0.110101678 | -0.008336564 | ITGA4                      |
| chr6  | 25992641  | 25992679  | 39   | * | 2  | 1.01101E-07 | 0.019962271 | 0.042146649 | 0.02737412  | -0.043231917 | -0.039370651 | U91328.21                  |

|       |           |           |      |   |    |             |             |             |             |              |              |                                |
|-------|-----------|-----------|------|---|----|-------------|-------------|-------------|-------------|--------------|--------------|--------------------------------|
| chr1  | 202130344 | 202131184 | 841  | * | 5  | 1.05445E-11 | 0.000166333 | 0.042151295 | 0.000988595 | -0.07383885  | -0.053898216 | PTPN7                          |
| chr3  | 39093076  | 39093977  | 902  | * | 12 | 1.40691E-10 | 0.064950694 | 0.04215152  | 0.010675934 | -0.070796938 | -0.006379083 | WDR48                          |
| chr1  | 16087752  | 16088002  | 251  | * | 3  | 7.03474E-08 | 0.003045806 | 0.042217752 | 0.007324562 | 0.10736107   | 0.075270293  | FBLIM1                         |
| chr12 | 54346462  | 54346859  | 398  | * | 4  | 6.55831E-09 | 0.000493604 | 0.042262889 | 0.002078974 | 0.096968599  | 0.054439366  |                                |
| chr21 | 44496043  | 44497077  | 1035 | * | 12 | 2.58762E-12 | 0.02713619  | 0.042264795 | 0.011838688 | 0.087307037  | 0.01788731   | CBS                            |
| chr3  | 33759422  | 33760473  | 1052 | * | 15 | 4.57402E-12 | 0.052314606 | 0.04234247  | 0.026244988 | -0.145184195 | -0.019082607 | CLASP2                         |
| chr2  | 175351471 | 175352427 | 957  | * | 13 | 1.57098E-10 | 0.005174459 | 0.042343304 | 0.013493009 | 0.085793411  | -0.016334801 | AC010894.3, GPR155             |
| chr2  | 71295019  | 71295731  | 713  | * | 14 | 3.43445E-08 | 0.196028257 | 0.042360819 | 0.147475474 | -0.07426748  | 0.000668239  | NAGK, RP11-467P9.1             |
| chr7  | 138347950 | 138348023 | 74   | * | 2  | 7.15263E-08 | 0.007815662 | 0.042406158 | 0.013745351 | 0.102543214  | 0.075174422  | SVOPL                          |
| chr12 | 53644994  | 53646162  | 1169 | * | 14 | 2.16087E-14 | 0.007005371 | 0.042423721 | 0.00453761  | 0.089951681  | 0.020605566  | MFSD5                          |
| chr11 | 3186095   | 3187032   | 938  | * | 9  | 1.99741E-13 | 0.001914527 | 0.042446401 | 0.001026174 | -0.088078799 | 0.013835904  | OSBPL5                         |
| chr11 | 2482223   | 2482929   | 707  | * | 13 | 5.26641E-09 | 0.164972997 | 0.04247596  | 0.104965201 | 0.136886057  | 0.044833088  | KCNQ1                          |
| chr14 | 69619846  | 69619916  | 71   | * | 3  | 1.1912E-07  | 0.03952714  | 0.042487169 | 0.045064509 | -0.032454766 | -0.001614312 | DCAF5                          |
| chr17 | 34135721  | 34136959  | 1239 | * | 14 | 4.09007E-11 | 0.140591948 | 0.042506796 | 0.031460863 | -0.045448213 | -0.002563621 | TAF15, AC015849.12             |
| chr6  | 33287941  | 33288372  | 432  | * | 8  | 9.93653E-09 | 0.156803337 | 0.042510404 | 0.056738871 | -0.139552895 | 0.015817567  | DAXX                           |
| chr19 | 50168129  | 50168328  | 200  | * | 4  | 1.44008E-07 | 0.021978653 | 0.042614239 | 0.024429903 | -0.049215898 | -0.012819579 | IRF3                           |
| chr6  | 30227294  | 30228431  | 1138 | * | 27 | 6.61626E-20 | 0.049387317 | 0.042621788 | 0.006947391 | 0.135216597  | 0.012748518  | HLA-L, HCG17                   |
| chr1  | 41174793  | 41175199  | 407  | * | 6  | 2.68872E-08 | 0.127569649 | 0.042657806 | 0.027201423 | 0.129621307  | 0.048187188  | NFYC                           |
| chr19 | 36545155  | 36546357  | 1203 | * | 15 | 4.00154E-10 | 0.131277919 | 0.042729264 | 0.039032138 | -0.023952723 | -0.001064475 | WDR62, THAP8                   |
| chr11 | 64850581  | 64851957  | 1377 | * | 17 | 1.64813E-09 | 0.160755836 | 0.042738637 | 0.063726219 | -0.1546878   | -0.009472878 | ZFPL1, CDCA5                   |
| chr6  | 29690766  | 29692281  | 1516 | * | 28 | 1.95388E-13 | 0.11823075  | 0.042758086 | 0.091243762 | 0.119675947  | 0.001086102  | HLA-F, HCG4P11                 |
| chr4  | 6202091   | 6202609   | 519  | * | 7  | 3.18504E-08 | 0.060883877 | 0.042822881 | 0.021971034 | -0.038376139 | 0.002026482  | RP11-586D19.1, JAKMIP1         |
| chr1  | 206679959 | 206680748 | 790  | * | 10 | 8.91074E-11 | 0.057157362 | 0.042869713 | 0.016265749 | 0.063333845  | 0.015887163  |                                |
| chr7  | 100547176 | 100547182 | 7    | * | 2  | 8.30731E-08 | 0.01220313  | 0.042940056 | 0.019395133 | 0.073579269  | 0.06110591   |                                |
| chr2  | 157291759 | 157292214 | 456  | * | 7  | 4.11618E-08 | 0.077989703 | 0.043041323 | 0.038678208 | -0.115847454 | -0.040522619 | GPD2                           |
| chr11 | 65343118  | 65344604  | 1487 | * | 10 | 6.66554E-10 | 0.002507464 | 0.043118762 | 0.001842444 | 0.145523789  | 0.027239561  | EHBP1L1                        |
| chr10 | 112630726 | 112632370 | 1645 | * | 18 | 3.10278E-13 | 0.0011882   | 0.043181901 | 0.001283705 | 0.169158357  | 0.008486903  | RP11-313D6.3, PDCD4, PDCD4-AS1 |
| chr1  | 65885364  | 65886416  | 1053 | * | 16 | 3.95761E-13 | 0.088157817 | 0.043190587 | 0.026382531 | -0.06425145  | -0.020623454 | LEPR, LEPROT                   |
| chr5  | 175788536 | 175789734 | 1199 | * | 16 | 3.44799E-13 | 0.070379813 | 0.043195005 | 0.012734542 | 0.107369646  | 0.013999615  | KIAA1191                       |

|       |           |           |      |   |    |             |             |             |             |              |              |                      |
|-------|-----------|-----------|------|---|----|-------------|-------------|-------------|-------------|--------------|--------------|----------------------|
| chr20 | 30795258  | 30795840  | 583  | * | 11 | 7.81152E-09 | 0.14454098  | 0.043243795 | 0.031917879 | -0.050293237 | 0.002335474  | POFUT1, PLAGL2       |
| chr12 | 14721288  | 14721386  | 99   | * | 2  | 8.72166E-08 | 0.234912857 | 0.043276842 | 0.092802829 | 0.132287316  | 0.072265627  | RP11-695J4.2         |
| chr16 | 85722306  | 85722814  | 509  | * | 8  | 4.03291E-08 | 0.040952979 | 0.043277339 | 0.022962576 | 0.022142165  | 0.007230855  | GINS2                |
| chr5  | 5422589   | 5423457   | 869  | * | 8  | 3.77417E-10 | 0.105318589 | 0.043280135 | 0.011417461 | -0.159663764 | -0.018142223 | KIAA0947             |
| chr4  | 74486080  | 74486675  | 596  | * | 11 | 1.93884E-12 | 0.076244845 | 0.043280538 | 0.008197534 | -0.113866095 | -0.003640241 | RASSF6               |
| chr14 | 101908561 | 101909681 | 1121 | * | 6  | 4.23812E-10 | 0.000681461 | 0.043342568 | 0.001163237 | 0.107942616  | 0.056595021  | RP11-168L7.3         |
| chr2  | 241525653 | 241526190 | 538  | * | 4  | 3.68315E-08 | 0.221406265 | 0.043353611 | 0.056524117 | -0.020202272 | -0.007057659 | CAPN10, CAPN10-AS1   |
| chr6  | 6004686   | 6005349   | 664  | * | 6  | 2.69429E-09 | 0.003519202 | 0.043378852 | 0.005954586 | 0.084042669  | 0.027148091  | NRN1                 |
| chr12 | 56120970  | 56123223  | 2254 | * | 27 | 1.72017E-16 | 0.025316721 | 0.043393661 | 0.001708919 | -0.066117287 | -0.014247383 | RP11-644F5.11, CD63  |
| chr2  | 136499099 | 136499517 | 419  | * | 6  | 2.61842E-08 | 0.003083628 | 0.043473208 | 0.006418894 | -0.020250338 | -8.40472E-06 | UBXN4                |
| chr16 | 22103791  | 22103855  | 65   | * | 3  | 2.09257E-07 | 0.294862429 | 0.043476398 | 0.120594526 | 0.109395867  | 0.047005306  |                      |
| chr15 | 34260433  | 34261172  | 740  | * | 8  | 4.55388E-10 | 0.003339235 | 0.043482972 | 0.006528999 | 0.167671823  | 0.049082515  | CHRM5, AVEN          |
| chr4  | 40517938  | 40518143  | 206  | * | 6  | 1.19295E-07 | 0.027185826 | 0.043492389 | 0.02612205  | 0.124270661  | 0.019827286  | RBM47                |
| chr8  | 144241809 | 144242448 | 640  | * | 8  | 8.09288E-08 | 0.392199942 | 0.043582016 | 0.033540368 | 0.056567604  | 0.009143993  | LY6H                 |
| chr2  | 198062260 | 198062750 | 491  | * | 4  | 7.29641E-08 | 0.007796974 | 0.043646897 | 0.012733223 | -0.250917471 | -0.124242516 | AC013264.2, ANKRD44  |
| chr10 | 119303831 | 119306025 | 2195 | * | 17 | 1.74287E-13 | 0.021235557 | 0.04366266  | 0.010970911 | 0.072023647  | 0.017975777  | EMX2, EMX2OS         |
| chr2  | 238499456 | 238500389 | 934  | * | 9  | 2.29029E-09 | 0.00988325  | 0.043692105 | 0.005411949 | 0.100095111  | 0.038585831  | AC104667.3, RAB17    |
| chr1  | 29063669  | 29064149  | 481  | * | 3  | 2.04398E-08 | 0.003811714 | 0.043718683 | 0.009098293 | 0.030930556  | 0.023758314  | YTHDF2               |
| chr16 | 75096418  | 75097037  | 620  | * | 4  | 2.44941E-08 | 0.001122419 | 0.043743886 | 0.003923895 | 0.092453996  | 0.000344642  | ZNRF1                |
| chr19 | 17958505  | 17959281  | 777  | * | 13 | 1.68498E-09 | 0.126824641 | 0.043801324 | 0.049404626 | 0.048868082  | 0.021775903  | JAK3                 |
| chr19 | 57018614  | 57019069  | 456  | * | 7  | 6.54812E-08 | 0.129370722 | 0.043802015 | 0.033112423 | 0.084976402  | 0.003071144  |                      |
| chr5  | 78531912  | 78532560  | 649  | * | 7  | 1.87461E-10 | 0.001765975 | 0.043826781 | 0.004077176 | 0.033116724  | 0.010889864  | JMY                  |
| chr5  | 74632092  | 74633655  | 1564 | * | 16 | 4.20372E-10 | 0.065866695 | 0.043860798 | 0.018234761 | -0.077012344 | -0.001331297 | HMGCR, CTD-2235C13.2 |
| chr18 | 11688008  | 11688350  | 343  | * | 3  | 5.25792E-08 | 0.025664551 | 0.043861269 | 0.021102774 | -0.057295439 | -0.040286825 |                      |
| chr3  | 100119718 | 100120793 | 1076 | * | 15 | 3.35029E-11 | 0.034240212 | 0.04386353  | 0.012173802 | -0.039644024 | 0.001164299  | LNP1, TOMM70A        |
| chr2  | 106013556 | 106014017 | 462  | * | 3  | 2.15956E-08 | 0.009067357 | 0.043873093 | 0.015870127 | 0.095438597  | 0.033166182  | FHL2                 |
| chr21 | 38337889  | 38338458  | 570  | * | 3  | 3.98471E-08 | 0.013968103 | 0.043873766 | 0.023231945 | -0.090070729 | -0.019756971 | HLCS                 |
| chr4  | 39640740  | 39640920  | 181  | * | 4  | 4.73431E-08 | 0.014457226 | 0.043897926 | 0.019199459 | -0.047246721 | -0.013067678 | RP11-539G18.2        |
| chr3  | 10028155  | 10028530  | 376  | * | 5  | 1.24439E-08 | 0.023516902 | 0.043933253 | 0.027976151 | -0.015945823 | 0.003967947  | EMC3                 |



|       |           |           |      |   |    |             |             |             |             |              |              |                                  |
|-------|-----------|-----------|------|---|----|-------------|-------------|-------------|-------------|--------------|--------------|----------------------------------|
| chr2  | 192712530 | 192712975 | 446  | * | 4  | 1.42672E-08 | 0.005595578 | 0.04394231  | 0.010876341 | 0.134950199  | 0.089898232  | AC098617.1                       |
| chr12 | 121147730 | 121148294 | 565  | * | 3  | 6.13716E-08 | 0.004920055 | 0.043963431 | 0.010021343 | 0.09953755   | 0.048765755  | UNC119B                          |
| chr12 | 122825944 | 122826219 | 276  | * | 4  | 9.36381E-09 | 0.000741174 | 0.044046991 | 0.002865419 | 0.067320235  | 0.055881765  | CLIP1                            |
| chr1  | 33646902  | 33647869  | 968  | * | 10 | 1.11653E-14 | 0.007380696 | 0.044106715 | 0.001962396 | -0.05840797  | -0.003965641 | TRIM62                           |
| chr8  | 27167110  | 27169256  | 2147 | * | 16 | 2.32699E-09 | 0.010523353 | 0.044125165 | 0.005088656 | -0.159025697 | -0.013370984 | PTK2B, TRIM35                    |
| chr7  | 1980117   | 1980892   | 776  | * | 6  | 1.48613E-09 | 0.001317275 | 0.044163471 | 0.003727676 | -0.127188433 | -0.076452945 | MAD1L1                           |
| chr3  | 149094653 | 149096029 | 1377 | * | 11 | 7.35367E-12 | 0.000286523 | 0.044231771 | 0.000827878 | -0.227640357 | -0.096858642 | TM4SF1-AS1, TM4SF1               |
| chr12 | 109027870 | 109028610 | 741  | * | 4  | 1.23726E-08 | 0.002338686 | 0.044234335 | 0.007171382 | 0.094793688  | -0.002425158 | RP11-689B22.2                    |
| chr1  | 225964937 | 225965777 | 841  | * | 13 | 3.17654E-13 | 0.001621644 | 0.044275666 | 0.001910471 | -0.111843405 | -0.016925816 | SRP9                             |
| chr8  | 87521102  | 87521456  | 355  | * | 8  | 1.24812E-08 | 0.161231273 | 0.044298986 | 0.017263782 | -0.120377501 | -0.02611215  | CPNE3, RMDN1                     |
| chr1  | 16301562  | 16302813  | 1252 | * | 11 | 2.53096E-12 | 0.000883521 | 0.044336901 | 0.002049274 | 0.11826892   | 0.000787455  | ZBTB17                           |
| chr9  | 130921736 | 130922050 | 315  | * | 5  | 9.72927E-08 | 0.015465941 | 0.044363119 | 0.016890759 | -0.135057136 | -0.039077523 |                                  |
| chr15 | 49170244  | 49170509  | 266  | * | 6  | 1.26939E-07 | 0.074440326 | 0.044411599 | 0.042091232 | -0.032396868 | 0.003210269  | EID1, AC012379.1, SHC4           |
| chr4  | 57301897  | 57301998  | 102  | * | 4  | 4.6665E-08  | 0.044410756 | 0.044461757 | 0.04257961  | 0.020897572  | 0.009488907  | PAICS                            |
| chr2  | 20425649  | 20425680  | 32   | * | 2  | 7.23649E-08 | 0.020185132 | 0.044464045 | 0.028168583 | 0.055162952  | 0.046418559  |                                  |
| chr2  | 74776815  | 74777409  | 595  | * | 8  | 1.68826E-10 | 0.107043613 | 0.044469603 | 0.030233055 | 0.095042068  | 0.017890313  | DOK1, LOXL3                      |
| chr17 | 3539210   | 3539728   | 519  | * | 9  | 3.1445E-09  | 0.04124993  | 0.044539284 | 0.0229989   | -0.030744534 | -0.00202226  | SHPK, SHPK                       |
| chr9  | 21993972  | 21994965  | 994  | * | 7  | 3.26071E-11 | 0.000163812 | 0.044553112 | 0.000806255 | -0.091690153 | -0.030284887 | RP11-145E5.5, CDKN2B-AS1, CDKN2A |
| chr5  | 81573780  | 81575188  | 1409 | * | 15 | 4.57647E-13 | 0.023605072 | 0.044608414 | 0.002201706 | -0.137781225 | -0.030881142 | RPS23                            |
| chr3  | 14165843  | 14167165  | 1323 | * | 16 | 1.4013E-16  | 0.000501906 | 0.044608918 | 0.00082647  | -0.03813755  | -0.001800167 | TMEM43, CHCHD4                   |
| chr11 | 67806118  | 67806526  | 409  | * | 7  | 2.08546E-08 | 0.024416557 | 0.044625322 | 0.028762573 | 0.104458266  | 0.021964355  | TCIRG1                           |
| chr11 | 3818695   | 3819539   | 845  | * | 18 | 2.99965E-14 | 0.012042556 | 0.044642998 | 0.006739254 | -0.082910928 | -0.0032056   | PGAP2, NUP98                     |
| chr20 | 54580070  | 54580196  | 127  | * | 4  | 1.92984E-08 | 0.003132875 | 0.04465789  | 0.007341407 | 0.060116211  | 0.044128718  | CBLN4                            |
| chr1  | 26797576  | 26799365  | 1790 | * | 15 | 1.49574E-10 | 0.023875993 | 0.044752696 | 0.004461755 | -0.129648972 | -0.028606578 | DHDDS, HMG2                      |
| chr16 | 3238423   | 3239638   | 1216 | * | 6  | 6.7213E-10  | 0.000656871 | 0.044755087 | 0.00171064  | 0.034690777  | 0.021310919  | AJ003147.9                       |
| chr16 | 47007486  | 47008028  | 543  | * | 7  | 4.41362E-08 | 0.121860468 | 0.044814898 | 0.061725445 | 0.025917348  | 0.010524577  | RP11-169E6.1, DNAJA2             |
| chr7  | 16793256  | 16794078  | 823  | * | 8  | 1.51411E-11 | 0.004981956 | 0.044831118 | 0.009113404 | 0.02716377   | 0.009747485  | TSPAN13                          |
| chr8  | 11626495  | 11628346  | 1852 | * | 14 | 8.45179E-16 | 1.16888E-05 | 0.044902882 | 0.000117902 | 0.09474854   | -0.010081226 | NEIL2                            |
| chr3  | 53915801  | 53916644  | 844  | * | 10 | 2.99191E-10 | 0.077317023 | 0.044984016 | 0.018417335 | 0.028359365  | -0.005640455 | ACTR8, AC012467.1                |

|       |           |           |      |   |    |             |             |             |             |              |              |                                |
|-------|-----------|-----------|------|---|----|-------------|-------------|-------------|-------------|--------------|--------------|--------------------------------|
| chr11 | 2290615   | 2292004   | 1390 | * | 10 | 4.17339E-12 | 0.004935818 | 0.045029465 | 0.004791218 | 0.067075362  | 0.019088856  | ASCL2                          |
| chr8  | 38243907  | 38244679  | 773  | * | 11 | 6.33117E-10 | 0.019545143 | 0.045043194 | 0.024495617 | -0.129801507 | -0.012881278 | LETM2                          |
| chr19 | 42636625  | 42637137  | 513  | * | 7  | 9.71342E-10 | 0.011406219 | 0.045056854 | 0.005874474 | 0.048480872  | 0.023945008  | CTC-378H22.1, POU2F2           |
| chr4  | 6988322   | 6989584   | 1263 | * | 16 | 5.38773E-14 | 0.011758035 | 0.045057253 | 0.002833469 | -0.112167151 | -0.011178228 | TBC1D14                        |
| chr6  | 108485043 | 108487820 | 2778 | * | 20 | 1.12245E-11 | 0.001221567 | 0.045177124 | 0.000752218 | 0.08230674   | 0.013568924  | NR2E1, OSTM1                   |
| chr4  | 56261740  | 56262107  | 368  | * | 7  | 8.42307E-09 | 0.061074654 | 0.045223458 | 0.0178589   | 0.016176085  | 0.003817489  | SRD5A3-AS1                     |
| chr12 | 31477192  | 31477737  | 546  | * | 5  | 6.42318E-10 | 0.000395001 | 0.045267995 | 0.001811212 | -0.051779756 | -0.018555755 | AC024940.1, FAM60A             |
| chr16 | 68057150  | 68057911  | 762  | * | 9  | 3.35876E-10 | 0.018815625 | 0.045291414 | 0.042495251 | 0.105483421  | 0.005310477  | DUS2, DDX28                    |
| chr8  | 63951472  | 63951879  | 408  | * | 8  | 2.27523E-08 | 0.014346962 | 0.045381411 | 0.021733488 | 0.016609106  | 0.006365666  | GGH                            |
| chr17 | 74721824  | 74722995  | 1172 | * | 16 | 6.18117E-11 | 0.295805653 | 0.045407806 | 0.052325654 | -0.09313573  | -0.011704198 | METTL23, JMJD6                 |
| chr8  | 81399093  | 81399518  | 426  | * | 3  | 2.82727E-08 | 0.005821031 | 0.045488976 | 0.012009596 | -0.074629978 | -0.040717679 | ZBTB10                         |
| chr16 | 29673933  | 29674487  | 555  | * | 5  | 3.70265E-08 | 0.092684212 | 0.045512244 | 0.027098503 | -0.058768247 | -0.025185506 | SPN                            |
| chr11 | 71159708  | 71159905  | 198  | * | 5  | 6.66757E-08 | 0.03178931  | 0.045547232 | 0.021263883 | 0.02732741   | 0.012432561  | RP11-660L16.2, DHCR7           |
| chr3  | 121553940 | 121554459 | 520  | * | 10 | 1.82733E-09 | 0.403873607 | 0.045559387 | 0.077411339 | -0.057261773 | -0.02029049  | EAF2                           |
| chr16 | 4322750   | 4323571   | 822  | * | 11 | 1.50954E-10 | 0.10904747  | 0.04562894  | 0.015491067 | -0.054641373 | -0.017008638 | TFAP4                          |
| chr9  | 36135760  | 36135812  | 53   | * | 2  | 1.93922E-07 | 0.01377631  | 0.045642259 | 0.021653325 | 0.156839462  | 0.125745762  |                                |
| chr22 | 41777658  | 41778188  | 531  | * | 9  | 3.35866E-09 | 0.056374679 | 0.045654284 | 0.028721087 | 0.028415909  | 0.005922473  | TEF                            |
| chr19 | 12661732  | 12663228  | 1497 | * | 14 | 6.98238E-10 | 0.021850092 | 0.045656887 | 0.012848826 | -0.060873335 | -0.01147618  | ZNF709, ZNF564, CTD-2192J16.20 |
| chr15 | 89148310  | 89148933  | 624  | * | 9  | 1.17872E-08 | 0.098456279 | 0.045658136 | 0.049160333 | 0.056433838  | 0.022304221  | RP11-97O12.2                   |
| chr11 | 133938586 | 133939265 | 680  | * | 9  | 5.15178E-10 | 0.015051356 | 0.04571995  | 0.013612721 | -0.042430709 | 0.00304648   | JAM3                           |
| chr19 | 42746143  | 42746319  | 177  | * | 5  | 8.54581E-08 | 0.043524914 | 0.045862551 | 0.020796933 | 0.025063075  | 0.002510753  | GSK3A, AC006486.9              |
| chr11 | 57103414  | 57103951  | 538  | * | 10 | 2.69611E-10 | 0.014580481 | 0.045900555 | 0.009247809 | -0.133009407 | -0.005547508 |                                |
| chr11 | 406492    | 407183    | 692  | * | 6  | 1.11015E-09 | 0.002942988 | 0.045918356 | 0.006674705 | -0.072039902 | 0.000646296  | SIGIRR                         |
| chr1  | 201475451 | 201476371 | 921  | * | 11 | 1.04204E-10 | 0.041090177 | 0.045927852 | 0.015017643 | 0.068902462  | 0.002948058  | RP11-134G8.7, CSRP1            |
| chr10 | 71930420  | 71931119  | 700  | * | 6  | 5.53713E-09 | 0.010720586 | 0.045944631 | 0.019286421 | -0.055972664 | -0.004197267 |                                |
| chr2  | 114513914 | 114514751 | 838  | * | 13 | 7.4986E-15  | 0.000141316 | 0.045966167 | 0.00046257  | -0.071957875 | -0.023666741 | SLC35F5                        |
| chr19 | 14142201  | 14142963  | 763  | * | 12 | 2.08217E-09 | 0.211161099 | 0.045976354 | 0.031524052 | 0.08279734   | 0.01302024   | IL27RA, CTB-55O6.4             |
| chr17 | 72931569  | 72932651  | 1083 | * | 13 | 1.40494E-12 | 0.003665833 | 0.04599711  | 0.003230519 | 0.138087578  | 0.045017692  | OTOP3                          |
| chr8  | 57026301  | 57027352  | 1052 | * | 8  | 3.50328E-11 | 0.00025425  | 0.045998882 | 0.000921794 | -0.12124348  | -0.04590734  | MOS                            |

|       |           |           |      |   |    |             |             |             |             |              |              |                                                      |
|-------|-----------|-----------|------|---|----|-------------|-------------|-------------|-------------|--------------|--------------|------------------------------------------------------|
| chr10 | 118928510 | 118928758 | 249  | * | 4  | 9.13558E-08 | 0.007088125 | 0.046000836 | 0.012474391 | 0.054662987  | 0.029429791  | RP11-501J20.2                                        |
| chr12 | 113229033 | 113229647 | 615  | * | 13 | 8.32637E-11 | 0.006621178 | 0.046038753 | 0.019750508 | 0.168496829  | 0.024323216  | RPH3A                                                |
| chr22 | 39714752  | 39715635  | 884  | * | 9  | 6.77833E-13 | 0.001732399 | 0.046193585 | 0.003079289 | -0.038972975 | 0.003298789  | RPL3, SNORD43                                        |
| chr4  | 8442090   | 8443089   | 1000 | * | 13 | 2.58779E-11 | 0.113425584 | 0.046206298 | 0.028482731 | 0.026340065  | 0.004414899  | TRMT44, ACOX3                                        |
| chr1  | 180198528 | 180199980 | 1453 | * | 8  | 4.13077E-08 | 0.030060925 | 0.046242776 | 0.015011188 | -0.033653949 | 0.000182064  | LHX4                                                 |
| chr19 | 44331823  | 44332311  | 489  | * | 4  | 4.1967E-09  | 0.034038095 | 0.046255785 | 0.018690686 | -0.125941431 | -0.062920331 | ZNF283                                               |
| chr16 | 29822365  | 29822997  | 633  | * | 8  | 7.41244E-10 | 0.00268237  | 0.046259536 | 0.008813943 | 0.030294762  | 0.008329389  | MAZ, AC009133.14, AC009133.20                        |
| chr12 | 111537057 | 111537211 | 155  | * | 4  | 1.5075E-07  | 0.001245218 | 0.046340657 | 0.004434641 | -0.060535521 | -0.045526994 | CUX2                                                 |
| chr11 | 62359415  | 62359899  | 485  | * | 6  | 9.69728E-11 | 0.043583681 | 0.046344015 | 0.017215816 | 0.089203822  | 0.019143108  | TUT1                                                 |
| chr19 | 58789674  | 58791159  | 1486 | * | 13 | 1.05798E-13 | 0.001548728 | 0.04638512  | 0.00233032  | -0.046641903 | -0.006073732 | CTD-3138B18.4, ZNF8, ZNF8, AC010642.1, CTD-3138B18.5 |
| chr12 | 125399097 | 125399716 | 620  | * | 8  | 1.21795E-09 | 0.006921751 | 0.046410561 | 0.011796404 | -0.033046918 | -0.00420371  | UBC                                                  |
| chr4  | 89618533  | 89619549  | 1017 | * | 15 | 3.18544E-10 | 0.084914285 | 0.046414495 | 0.072937274 | -0.094042349 | -0.021524827 | HERC3, NAP1L5                                        |
| chr1  | 32478846  | 32479956  | 1111 | * | 11 | 1.8964E-10  | 0.09654803  | 0.046428984 | 0.032035171 | -0.031420879 | -0.005127985 | KHDRBS1                                              |
| chr1  | 55446131  | 55446960  | 830  | * | 7  | 7.69676E-10 | 0.001514693 | 0.046467951 | 0.004586797 | 0.105132371  | 0.027731733  | TMEM61, RP11-12C17.2                                 |
| chr11 | 47207435  | 47208367  | 933  | * | 9  | 1.35386E-09 | 0.054604612 | 0.046552758 | 0.013418428 | 0.036194675  | 0.008791553  | PACSIN3                                              |
| chr4  | 4859772   | 4862240   | 2469 | * | 32 | 3.32116E-12 | 0.030975375 | 0.04656354  | 0.0166186   | 0.099808354  | 0.012842672  | MSX1                                                 |
| chr1  | 13839650  | 13840712  | 1063 | * | 13 | 4.27831E-13 | 0.003678675 | 0.046578908 | 0.003134343 | 0.091461304  | 0.013723234  | RP4-597A16.2, LRRC38                                 |
| chr22 | 26877690  | 26880401  | 2712 | * | 15 | 1.76548E-11 | 5.63964E-06 | 0.046579974 | 6.00818E-05 | 0.148504522  | 0.036079034  | SRRD, HPS4                                           |
| chr17 | 35078070  | 35078659  | 590  | * | 5  | 8.51876E-09 | 0.000951543 | 0.046580585 | 0.002733986 | -0.079688807 | -0.025996917 |                                                      |
| chr15 | 85291082  | 85291317  | 236  | * | 4  | 3.45648E-08 | 0.044542288 | 0.046847649 | 0.020877508 | -0.020991312 | -0.005311986 |                                                      |
| chr11 | 74178462  | 74179549  | 1088 | * | 11 | 5.52582E-09 | 0.022416662 | 0.046893131 | 0.015192198 | 0.107442585  | 0.019590388  | RP11-702H23.4, KCNE3                                 |
| chr7  | 77427242  | 77428849  | 1608 | * | 28 | 6.14073E-15 | 0.015379848 | 0.046898944 | 0.009001666 | -0.080714386 | -0.004972992 | PHTF2, TMEM60                                        |
| chr6  | 17393365  | 17393825  | 461  | * | 9  | 5.15338E-11 | 0.016307024 | 0.046914172 | 0.006796248 | 0.075149392  | 0.037863062  | CAP2                                                 |
| chr19 | 16683254  | 16683989  | 736  | * | 10 | 1.04918E-09 | 0.032542372 | 0.046928487 | 0.023689482 | 0.031993444  | 0.003645948  | CTD-3222D19.2                                        |
| chr2  | 111435449 | 111435943 | 495  | * | 8  | 2.04181E-08 | 0.052064114 | 0.046930874 | 0.022286    | -0.051060927 | -0.018245132 | BUB1                                                 |
| chr16 | 71928489  | 71930048  | 1560 | * | 19 | 2.1397E-10  | 0.043048804 | 0.04698509  | 0.031194889 | -0.059149091 | -0.000312997 | IST1, ZNF821                                         |
| chr19 | 9938028   | 9939038   | 1011 | * | 13 | 1.21784E-10 | 0.021227123 | 0.047079387 | 0.011654839 | -0.132635136 | -0.030072312 | UBL5, FBXL12                                         |
| chr17 | 17109239  | 17109936  | 698  | * | 9  | 1.16501E-09 | 0.004030726 | 0.047079832 | 0.006873701 | -0.147785613 | -0.024981989 | MPRIIP, PLD6, RP11-45M22.4                           |
| chr5  | 111093199 | 111094068 | 870  | * | 14 | 1.30061E-10 | 0.107599695 | 0.047085202 | 0.03608095  | -0.041162154 | -0.001610068 | NREP                                                 |

|       |           |           |      |   |    |             |             |             |             |              |              |                                          |
|-------|-----------|-----------|------|---|----|-------------|-------------|-------------|-------------|--------------|--------------|------------------------------------------|
| chr17 | 907643    | 907886    | 244  | * | 4  | 5.75546E-08 | 0.001403524 | 0.04709571  | 0.004638768 | 0.186339885  | 0.100519228  | ABR                                      |
| chr19 | 36266235  | 36266840  | 606  | * | 9  | 1.84579E-08 | 0.08919729  | 0.047112134 | 0.043615674 | -0.056115982 | -0.016690982 | ARHGAP33                                 |
| chr10 | 123922506 | 123923881 | 1376 | * | 14 | 1.69879E-13 | 0.001968286 | 0.047118871 | 0.005083967 | 0.070121292  | 0.033734104  | TACC2                                    |
| chr1  | 33283105  | 33284208  | 1104 | * | 15 | 4.22025E-12 | 0.426306222 | 0.047144495 | 0.038828309 | 0.043577211  | 0.005196031  | S100BPB, YARS                            |
| chr6  | 157099227 | 157099924 | 698  | * | 4  | 3.55145E-08 | 0.003345872 | 0.047193844 | 0.008328014 | 0.03269588   | -0.002354911 | ARID1B                                   |
| chr12 | 113913887 | 113914611 | 725  | * | 6  | 1.26077E-08 | 0.005023251 | 0.047247381 | 0.007831755 | 0.043493742  | 0.028071109  | RP11-82C23.2                             |
| chr14 | 61201602  | 61201977  | 376  | * | 3  | 7.98556E-08 | 0.008187763 | 0.047256825 | 0.015194714 | 0.029040787  | 0.003900334  | MNAT1                                    |
| chr19 | 45393621  | 45394624  | 1004 | * | 12 | 6.55074E-13 | 0.000239201 | 0.047269771 | 0.001232508 | -0.038342596 | 0.000107826  | TOMM40, CTB-129P6.4                      |
| chr6  | 32921521  | 32921805  | 285  | * | 3  | 3.0111E-08  | 0.057097779 | 0.047333003 | 0.050857054 | 0.103713406  | 0.0392962    | HLA-DMA                                  |
| chr2  | 233390699 | 233391265 | 567  | * | 7  | 4.63622E-10 | 0.002285418 | 0.047335152 | 0.00458339  | 0.133794031  | 0.076801499  | CHRND                                    |
| chr11 | 1892038   | 1892888   | 851  | * | 9  | 6.94771E-09 | 0.043860737 | 0.047349031 | 0.017717558 | 0.119611143  | 0.047345056  | LSP1                                     |
| chr1  | 150208865 | 150209464 | 600  | * | 7  | 2.38589E-08 | 0.172909987 | 0.047372455 | 0.051179405 | -0.134149179 | -0.023503862 | RNU2-17P                                 |
| chr20 | 49253364  | 49253710  | 347  | * | 5  | 1.00214E-07 | 0.012494378 | 0.047388372 | 0.01170581  | 0.137129274  | 0.055161887  | FAM65C                                   |
| chr2  | 232572668 | 232573281 | 614  | * | 8  | 1.19391E-09 | 0.008470174 | 0.047430292 | 0.009915317 | -0.11784995  | -0.018730453 | PTMA                                     |
| chr7  | 27207996  | 27209350  | 1355 | * | 20 | 3.29096E-14 | 0.214910447 | 0.047444766 | 0.059669143 | -0.105652584 | -0.004040747 | HOXA10-AS, HOXA9, RP1-170O19.20, MIR196B |
| chr14 | 77228497  | 77229233  | 737  | * | 7  | 4.72413E-09 | 0.003457632 | 0.047514405 | 0.006928843 | 0.078602874  | 0.028299465  | VASH1                                    |
| chr8  | 57123418  | 57124749  | 1332 | * | 10 | 1.44673E-10 | 0.001687368 | 0.047533425 | 0.002691539 | -0.075444423 | -0.007621804 | CHCHD7, PLAG1                            |
| chr4  | 57975815  | 57977040  | 1226 | * | 14 | 3.0675E-10  | 0.02060732  | 0.047682867 | 0.021390073 | -0.057043378 | -0.003770116 | IGFBP7-AS1, IGFBP7                       |
| chr6  | 30292743  | 30294255  | 1513 | * | 21 | 2.85906E-14 | 0.011769909 | 0.047694698 | 0.023171531 | -0.067966169 | 0.002864265  | HCG17, HCG18                             |
| chr12 | 65563159  | 65564395  | 1237 | * | 7  | 2.85347E-12 | 4.62382E-05 | 0.047802744 | 0.000361446 | -0.052486525 | 0.002942221  | LEMD3                                    |
| chr5  | 72111910  | 72112729  | 820  | * | 13 | 1.64355E-09 | 0.20035457  | 0.047814021 | 0.041216842 | -0.040672311 | 0.000550312  | TNPO1, CTD-2631K10.1                     |
| chr6  | 150186269 | 150186488 | 220  | * | 5  | 3.8804E-09  | 0.026153919 | 0.047869531 | 0.014521505 | -0.10045274  | -0.057665283 | RP11-244K5.8                             |
| chr22 | 24822802  | 24823554  | 753  | * | 10 | 6.90655E-11 | 0.004025677 | 0.047884272 | 0.005175721 | -0.13428525  | -0.019677323 | SPECC1L-ADORA2A, ADORA2A                 |
| chr1  | 29508764  | 29509335  | 572  | * | 5  | 6.6659E-08  | 0.024517526 | 0.047930772 | 0.005877256 | -0.052674175 | -0.013389841 |                                          |
| chr19 | 37861449  | 37862272  | 824  | * | 12 | 4.60787E-09 | 0.044953279 | 0.04793349  | 0.025644018 | -0.051334441 | -0.011982277 | ZNF527                                   |
| chr12 | 63544175  | 63544430  | 256  | * | 3  | 1.79447E-08 | 0.002179541 | 0.047942808 | 0.006152807 | 0.056500973  | 0.039935682  | AVPR1A                                   |
| chr2  | 95831790  | 95831943  | 154  | * | 3  | 8.42585E-08 | 0.011654032 | 0.048021595 | 0.021115742 | -0.029057185 | -0.009553138 | ZNF2                                     |
| chr7  | 100424945 | 100425827 | 883  | * | 10 | 9.84347E-13 | 0.002528871 | 0.048064696 | 0.001464979 | -0.07049241  | -0.007364324 | SLC12A9, EPHB4                           |
| chr17 | 14204310  | 14204478  | 169  | * | 3  | 1.60392E-07 | 0.024661497 | 0.048212665 | 0.030971842 | 0.023120453  | 0.011410849  | HS3ST3B1                                 |

|       |           |           |      |   |    |             |             |             |             |              |              |                                    |
|-------|-----------|-----------|------|---|----|-------------|-------------|-------------|-------------|--------------|--------------|------------------------------------|
| chr10 | 121651781 | 121652237 | 457  | * | 9  | 1.26853E-08 | 0.020236306 | 0.04825206  | 0.02531794  | -0.030003066 | -0.003179123 | SEC23IP, MCMBP                     |
| chr20 | 43743736  | 43744110  | 375  | * | 7  | 6.14077E-09 | 0.007245318 | 0.04826183  | 0.01207038  | 0.125616442  | 0.049929421  | WFDC5                              |
| chr1  | 154531393 | 154531564 | 172  | * | 6  | 3.55398E-09 | 0.072874486 | 0.048274354 | 0.011842927 | 0.049213237  | 0.014378764  | UBE2Q1                             |
| chr19 | 51486901  | 51487968  | 1068 | * | 15 | 1.54554E-15 | 0.010875693 | 0.048297953 | 0.002864519 | 0.150418683  | 0.06088416   | CTB-147C22.9, KLK7                 |
| chr2  | 178129336 | 178130312 | 977  | * | 11 | 1.95226E-10 | 0.017898103 | 0.048318411 | 0.01165806  | -0.053904325 | -0.000588836 | AC079305.10, NFE2L2                |
| chr11 | 66360740  | 66361081  | 342  | * | 5  | 2.29508E-09 | 0.001007907 | 0.048350707 | 0.002952629 | -0.114533045 | -0.071992578 | CCS                                |
| chr20 | 39656786  | 39658073  | 1288 | * | 11 | 7.93151E-13 | 0.0007789   | 0.04835188  | 0.001602781 | -0.040247776 | -0.000957893 | TOP1                               |
| chr17 | 79268614  | 79268763  | 150  | * | 2  | 9.5233E-08  | 0.08092839  | 0.048381386 | 0.067103594 | 0.018343306  | 0.013011728  | SLC38A10                           |
| chr20 | 57617810  | 57618246  | 437  | * | 6  | 8.70787E-08 | 0.012450315 | 0.048467659 | 0.016831807 | 0.041150001  | 0.018799763  | SLMO2                              |
| chr5  | 149339858 | 149340861 | 1004 | * | 13 | 9.14195E-10 | 0.32179773  | 0.04849255  | 0.038822409 | -0.054593625 | 0.002830913  | SLC26A2                            |
| chr1  | 232765331 | 232765605 | 275  | * | 3  | 5.07367E-08 | 0.002944278 | 0.048540456 | 0.007796158 | -0.201282734 | -0.052995011 |                                    |
| chr8  | 42397376  | 42397764  | 389  | * | 5  | 4.23911E-09 | 0.025135162 | 0.048575765 | 0.014247125 | 0.140954804  | 0.069018997  | SMIM19                             |
| chr1  | 193090988 | 193091399 | 412  | * | 7  | 1.97033E-09 | 0.033789578 | 0.048593211 | 0.013836329 | -0.073479512 | 5.13591E-05  | CDC73                              |
| chr1  | 172501480 | 172502226 | 747  | * | 9  | 4.06548E-09 | 0.212182059 | 0.048750743 | 0.025798157 | -0.056584328 | -0.01191592  | SUCO                               |
| chr16 | 82659960  | 82660873  | 914  | * | 15 | 9.7015E-11  | 0.091884582 | 0.048752178 | 0.040425728 | 0.094935573  | 0.021267133  | CDH13                              |
| chr14 | 101512216 | 101514051 | 1836 | * | 14 | 2.16075E-11 | 0.005890102 | 0.048757043 | 0.001948645 | 0.146593304  | 0.054846193  | MIR381HG, MIR381, MIR487B, MIR539  |
| chr1  | 100598159 | 100599169 | 1011 | * | 14 | 8.06239E-10 | 0.051040594 | 0.048852894 | 0.04385493  | -0.033099971 | -0.002787828 | TRMT13, SASS6                      |
| chr2  | 74756234  | 74756297  | 64   | * | 3  | 1.83837E-07 | 0.008271286 | 0.048869704 | 0.01536341  | 0.059628085  | 0.024182251  | AUP1                               |
| chr16 | 69220400  | 69220726  | 327  | * | 3  | 3.77656E-08 | 0.00588448  | 0.048877694 | 0.01228721  | -0.049317649 | -0.013699217 | CIRH1A                             |
| chr3  | 178978849 | 178979013 | 165  | * | 5  | 6.04293E-08 | 0.001092245 | 0.048922008 | 0.004516829 | 0.168156537  | 0.106315293  | KCNMB3, LRRFIP1P1                  |
| chr7  | 92464881  | 92465342  | 462  | * | 8  | 4.5403E-08  | 0.092338326 | 0.048949386 | 0.050970616 | -0.04914281  | 0.003671938  | CDK6                               |
| chr3  | 185825749 | 185827776 | 2028 | * | 17 | 9.98538E-16 | 0.001248257 | 0.048953867 | 0.000519014 | -0.054123891 | -0.022579742 | ETV5, DGKG                         |
| chr6  | 32145373  | 32146779  | 1407 | * | 28 | 9.68711E-19 | 0.246929937 | 0.049005437 | 0.039621416 | -0.062003557 | -0.006835537 | RNF5, AGPAT1                       |
| chr19 | 50379397  | 50380022  | 626  | * | 9  | 1.03883E-10 | 0.002499956 | 0.049026268 | 0.009706321 | -0.049704317 | -0.010071089 | AKT1S1                             |
| chr1  | 193028138 | 193029428 | 1291 | * | 20 | 4.98459E-21 | 0.0032525   | 0.049103269 | 0.000454289 | -0.064216684 | -0.008649    | TROVE2, UCHL5                      |
| chr6  | 31631638  | 31634237  | 2600 | * | 56 | 6.76247E-32 | 0.00012117  | 0.049121894 | 0.000129419 | 0.147026315  | 0.011150589  | CSNK2B, CSNK2B-LY6G5B-1181, GPANK1 |
| chr10 | 95326974  | 95327325  | 352  | * | 5  | 3.01509E-10 | 0.003194344 | 0.049130862 | 0.008898365 | 0.055633053  | -0.010760826 | FFAR4                              |
| chr17 | 41131552  | 41133424  | 1873 | * | 22 | 1.90931E-21 | 7.89124E-06 | 0.049133971 | 3.81513E-05 | 0.061570257  | -0.011081476 | RUNDC1, PTGES3L-AARSD1, PTGES3L    |
| chr9  | 20621203  | 20622658  | 1456 | * | 16 | 8.12584E-13 | 0.02494706  | 0.049136174 | 0.008942084 | -0.063223906 | -0.018766989 | MLLT3                              |

|       |           |           |      |   |    |             |             |             |             |              |              |                            |
|-------|-----------|-----------|------|---|----|-------------|-------------|-------------|-------------|--------------|--------------|----------------------------|
| chr5  | 77590494  | 77591002  | 509  | * | 12 | 1.71708E-09 | 0.042992233 | 0.049160997 | 0.040195381 | -0.051849335 | -0.003677017 | AP3B1                      |
| chr14 | 69446137  | 69446981  | 845  | * | 10 | 1.03681E-10 | 0.05688812  | 0.049169201 | 0.02374012  | -0.076693824 | -0.01661626  | ACTN1-AS1, ACTN1           |
| chr11 | 10471371  | 10471687  | 317  | * | 3  | 2.8351E-08  | 0.018445938 | 0.049286129 | 0.021391952 | -0.158693544 | -0.076680157 | AMPD3                      |
| chr19 | 57351440  | 57352807  | 1368 | * | 22 | 1.18119E-14 | 0.050724801 | 0.049386854 | 0.024277352 | -0.13350223  | -0.025661047 | MIMT1, ZIM2, PEG3          |
| chr1  | 16543684  | 16544950  | 1267 | * | 9  | 1.10953E-10 | 0.000382858 | 0.049428222 | 0.001315958 | 0.145968943  | 0.020418373  | ANO7P1                     |
| chr6  | 35435693  | 35436891  | 1199 | * | 11 | 3.53126E-11 | 0.026165945 | 0.049563765 | 0.005547066 | -0.071597544 | 0.003184109  | RPL10A                     |
| chr19 | 52391078  | 52391304  | 227  | * | 7  | 1.23134E-07 | 0.027649994 | 0.049597269 | 0.009494775 | 0.123934606  | 0.073762276  | CTC-429C10.2, ZNF577       |
| chr8  | 67624233  | 67625280  | 1048 | * | 12 | 1.08649E-12 | 0.021533694 | 0.049634846 | 0.006378647 | -0.050750065 | -0.006804783 | C8orf44-SGK3, SGK3         |
| chr5  | 67583598  | 67584297  | 700  | * | 12 | 3.11892E-09 | 0.049168673 | 0.049756268 | 0.038021842 | 0.055585419  | 0.009441677  | PIK3R1                     |
| chr1  | 153939684 | 153941904 | 2221 | * | 24 | 9.5882E-11  | 0.001174494 | 0.049788688 | 0.00187877  | 0.2063835    | 0.013819731  | CREB3L4, SLC39A1           |
| chr2  | 16082022  | 16082927  | 906  | * | 7  | 2.4056E-09  | 0.162750965 | 0.049835256 | 0.021468528 | -0.129076888 | -0.029387267 | MYCN, MYCNOS               |
| chr22 | 37172204  | 37172423  | 220  | * | 5  | 1.61362E-07 | 0.009357442 | 0.049918209 | 0.009889388 | -0.044777083 | -0.013281912 | IFT27                      |
| chr15 | 48623100  | 48624389  | 1290 | * | 20 | 2.28251E-15 | 0.002215036 | 0.049972828 | 0.001611624 | -0.059126465 | -0.010709649 | DUT, RP11-154J22.1         |
| chr19 | 36980364  | 36980975  | 612  | * | 21 | 3.87127E-14 | 0.049237451 | 0.049994404 | 0.032848309 | -0.046134876 | -0.009963135 | CTD-2630F21.1, ZNF566      |
| chr17 | 79816559  | 79817633  | 1075 | * | 6  | 1.00027E-10 | 0.00041496  | 0.050000713 | 0.001689022 | -0.129223785 | -0.091319044 | P4HB                       |
| chr5  | 172483116 | 172484594 | 1479 | * | 15 | 2.93212E-12 | 0.000360052 | 0.05005244  | 0.001314501 | -0.045697724 | -0.005932814 | CREBRF                     |
| chr17 | 73105356  | 73106517  | 1162 | * | 12 | 2.04416E-09 | 0.046286885 | 0.050057592 | 0.014429261 | 0.038169211  | 0.005724083  | ARMC7                      |
| chr11 | 95522512  | 95524042  | 1531 | * | 18 | 6.83325E-14 | 0.002097111 | 0.050071885 | 0.004369054 | -0.039926223 | -0.013041131 | CEP57, FAM76B              |
| chr9  | 103191365 | 103191817 | 453  | * | 6  | 4.74361E-10 | 0.000455214 | 0.050089579 | 0.001481843 | 0.100356475  | 0.070106587  | MSANTD3                    |
| chr10 | 26727173  | 26728036  | 864  | * | 8  | 5.60127E-10 | 0.040000904 | 0.050114228 | 0.035340494 | 0.053170912  | 0.01168639   | APBB1IP                    |
| chr5  | 86563580  | 86564119  | 540  | * | 10 | 2.74799E-09 | 0.012137655 | 0.050152185 | 0.022757667 | -0.064171084 | -0.010005571 | RASA1                      |
| chr19 | 49403382  | 49403969  | 588  | * | 7  | 5.50834E-08 | 0.348614481 | 0.0501624   | 0.032470509 | -0.063108209 | -0.02277686  | NUCB1                      |
| chr2  | 102608155 | 102608349 | 195  | * | 5  | 1.8523E-07  | 0.001910339 | 0.050176496 | 0.006868628 | -0.082526874 | -0.071827508 | IL1R2                      |
| chr15 | 44117116  | 44117184  | 69   | * | 4  | 1.95627E-07 | 0.001996644 | 0.050202137 | 0.006260687 | 0.066928442  | 0.054541188  |                            |
| chr8  | 132916222 | 132916947 | 726  | * | 4  | 4.37886E-10 | 0.002039015 | 0.050213199 | 0.005507631 | 0.040008601  | 0.022263262  | EFR3A                      |
| chr20 | 655888    | 656558    | 671  | * | 5  | 6.49224E-08 | 0.029193704 | 0.050250081 | 0.026010881 | -0.062721878 | 0.00133121   | RP5-850E9.3, SCRT2         |
| chr1  | 47799302  | 47799834  | 533  | * | 7  | 4.49142E-09 | 0.034261458 | 0.050293559 | 0.012596206 | -0.03084063  | -0.001024201 | CMPK1                      |
| chr7  | 87563649  | 87564345  | 697  | * | 8  | 1.48499E-08 | 0.044799426 | 0.050302015 | 0.032119186 | -0.025704693 | 0.003662684  | ADAM22                     |
| chr19 | 10397031  | 10398215  | 1185 | * | 8  | 2.4487E-09  | 0.00177015  | 0.050306016 | 0.003306579 | -0.095365111 | -0.026091859 | ICAM1, ICAM4, CTD-2369P2.8 |

|       |           |           |      |   |    |             |             |             |             |              |              |                                        |
|-------|-----------|-----------|------|---|----|-------------|-------------|-------------|-------------|--------------|--------------|----------------------------------------|
| chr19 | 54663286  | 54664576  | 1291 | * | 14 | 1.46077E-09 | 0.044331386 | 0.05045653  | 0.045940633 | 0.047415249  | 0.003688372  | LENG1, TMC4                            |
| chr20 | 45318448  | 45319455  | 1008 | * | 8  | 4.01383E-11 | 0.027059278 | 0.050550136 | 0.016017808 | -0.089021821 | -0.024142182 | RP1-28H20.3                            |
| chr16 | 68482463  | 68483194  | 732  | * | 11 | 5.08141E-11 | 0.011022944 | 0.050608308 | 0.012208234 | 0.101529984  | 0.026769426  | SMPD3                                  |
| chr1  | 227915846 | 227916787 | 942  | * | 14 | 1.83293E-11 | 0.008239721 | 0.050672376 | 0.011026809 | -0.082192238 | -0.005126681 | SNAP47                                 |
| chr1  | 213124368 | 213124896 | 529  | * | 5  | 2.51877E-08 | 0.003238005 | 0.050689612 | 0.007545445 | 0.026726686  | 0.018670254  | VASH2                                  |
| chr5  | 1003897   | 1004495   | 599  | * | 5  | 1.26662E-08 | 0.020728411 | 0.050697829 | 0.014180906 | 0.129820199  | 0.077654141  | AC116351.2                             |
| chr20 | 39766360  | 39766794  | 435  | * | 6  | 1.54772E-09 | 0.001300664 | 0.050746996 | 0.004162367 | 0.034372621  | 0.015894447  | PLCG1, RP1-1J6.2                       |
| chr12 | 93964231  | 93965732  | 1502 | * | 23 | 3.15961E-12 | 0.056046681 | 0.050749672 | 0.029448457 | 0.030283125  | 0.003738748  | SOCS2, SOCS2-AS1                       |
| chr11 | 64545585  | 64546660  | 1076 | * | 16 | 2.99491E-12 | 0.185251238 | 0.050781017 | 0.026144726 | -0.063561066 | -0.01081079  | AP001462.6, SF1                        |
| chr18 | 60381593  | 60382764  | 1172 | * | 15 | 2.61284E-14 | 0.042206324 | 0.0508744   | 0.002059576 | -0.139590909 | -0.005702519 | PHLPP1                                 |
| chr4  | 48781911  | 48782840  | 930  | * | 12 | 1.40534E-09 | 0.05443118  | 0.05087486  | 0.034909578 | -0.046738493 | -0.016394027 | FRYL                                   |
| chr7  | 150974273 | 150974839 | 567  | * | 9  | 1.41932E-09 | 0.033246253 | 0.050903016 | 0.015411135 | 0.035301887  | 0.01106884   | SMARCD3                                |
| chr1  | 6673671   | 6673734   | 64   | * | 4  | 8.17183E-08 | 0.003623927 | 0.050943888 | 0.007681721 | -0.095124673 | -0.024055857 | KLHL21                                 |
| chr19 | 41858816  | 41860095  | 1280 | * | 11 | 7.37034E-13 | 0.003173547 | 0.05095287  | 0.004065837 | -0.059923719 | -0.02946966  | CTC-435M10.3, TMEM91, TGFB1            |
| chr11 | 10829582  | 10830972  | 1391 | * | 19 | 5.64705E-17 | 0.018285905 | 0.05096161  | 0.005637077 | -0.041413862 | -0.000526384 | RP11-685M7.3, EIF4G2                   |
| chr15 | 101419243 | 101419518 | 276  | * | 8  | 1.20043E-07 | 0.036400223 | 0.051142759 | 0.025589072 | -0.06069548  | -0.015363286 | RP11-66B24.8, ALDH1A3                  |
| chr2  | 207629824 | 207630694 | 871  | * | 18 | 1.45337E-10 | 0.060070959 | 0.051178767 | 0.062713788 | 0.033173144  | -0.002580466 | FASTKD2, MDH1B                         |
| chr12 | 54812606  | 54813531  | 926  | * | 11 | 5.25935E-11 | 0.102349805 | 0.051203402 | 0.018965385 | -0.062001148 | -0.017448873 | RP11-753H16.3, RP11-753H16.5,<br>ITGA5 |
| chr16 | 68676555  | 68677020  | 466  | * | 6  | 2.12006E-08 | 0.140221421 | 0.051337201 | 0.031605144 | 0.055977158  | 0.023076733  | CDH3                                   |
| chr6  | 99962757  | 99964114  | 1358 | * | 14 | 2.20933E-11 | 0.004070231 | 0.051345322 | 0.009500474 | 0.125098183  | 0.013778095  | USP45                                  |
| chr1  | 47009446  | 47010223  | 778  | * | 7  | 1.89032E-10 | 0.002994375 | 0.051359259 | 0.002667064 | 0.081436559  | 0.038371637  | MKNK1-AS1                              |
| chr1  | 161067663 | 161068715 | 1053 | * | 12 | 7.70901E-11 | 0.016611555 | 0.051392167 | 0.01185709  | 0.061105882  | 0.012780456  | KLHDC9                                 |
| chr12 | 26985412  | 26986520  | 1109 | * | 12 | 5.40023E-10 | 0.066038304 | 0.051400587 | 0.025111045 | 0.02266297   | 0.005302712  | ITPR2                                  |
| chr19 | 10380576  | 10381577  | 1002 | * | 11 | 2.54355E-11 | 0.017257841 | 0.051410141 | 0.010978944 | 0.034244898  | 0.006213409  | ICAM1, CTD-2369P2.5                    |
| chr1  | 229478617 | 229479495 | 879  | * | 9  | 3.28862E-09 | 0.077481481 | 0.051416656 | 0.017177713 | -0.037834495 | -0.003944912 | CCSAP                                  |
| chr16 | 57220573  | 57220662  | 90   | * | 2  | 5.54534E-08 | 0.018840727 | 0.051503926 | 0.02835642  | -0.052802446 | -0.042862916 | RSPRY1                                 |
| chr7  | 44240380  | 44240862  | 483  | * | 8  | 2.42826E-09 | 0.004868719 | 0.051517878 | 0.004824281 | 0.031665348  | 0.009950688  | YKT6                                   |
| chr5  | 179105622 | 179105869 | 248  | * | 4  | 4.99585E-08 | 0.000928853 | 0.051565809 | 0.003640382 | 0.01783636   | 0.0126502    | CANX, CBY3                             |
| chr8  | 95961492  | 95962463  | 972  | * | 15 | 2.2739E-21  | 7.06422E-09 | 0.051567636 | 1.3732E-06  | 0.137227723  | 0.041941427  | NDUFAF6, RP11-347C18.3,<br>TP53INP1    |

|       |           |           |      |   |    |             |             |             |             |              |              |                        |
|-------|-----------|-----------|------|---|----|-------------|-------------|-------------|-------------|--------------|--------------|------------------------|
| chr18 | 42259024  | 42260451  | 1428 | * | 14 | 4.64398E-10 | 0.002096361 | 0.051656691 | 0.004159174 | -0.052074714 | 0.007681312  | SETBP1, RP11-456K23.1  |
| chr10 | 70091418  | 70092729  | 1312 | * | 13 | 6.69173E-14 | 0.000502138 | 0.051737882 | 0.000897699 | -0.084438661 | -0.004614706 | HNRNPH3, PBLD          |
| chr1  | 1655838   | 1655942   | 105  | * | 4  | 9.6432E-08  | 0.001943054 | 0.051775355 | 0.005930911 | 0.05393292   | 0.032905396  | RP1-283E3.8            |
| chr5  | 140026925 | 140027949 | 1025 | * | 17 | 5.90796E-11 | 0.095696579 | 0.051779405 | 0.040825562 | 0.045961662  | 0.008109651  | IK, MIR3655, NDUFA2    |
| chr7  | 2646782   | 2648289   | 1508 | * | 10 | 7.87873E-11 | 0.007009078 | 0.051827816 | 0.017876315 | 0.160698309  | 0.073154252  | IQCE                   |
| chr17 | 55162855  | 55163212  | 358  | * | 7  | 2.84329E-08 | 0.11555823  | 0.051839685 | 0.055830447 | 0.031753798  | 0.00019399   | AKAP1                  |
| chr2  | 233414677 | 233415810 | 1134 | * | 19 | 3.28976E-11 | 0.15095696  | 0.05187943  | 0.05599848  | 0.126859831  | 0.015830008  | EIF4E2, TIGD1, MIR5001 |
| chr3  | 50374304  | 50376000  | 1697 | * | 25 | 1.66535E-15 | 0.199060131 | 0.051907495 | 0.016029262 | -0.063279374 | -0.001861885 | RASSF1                 |
| chr2  | 70780723  | 70781770  | 1048 | * | 14 | 5.27073E-13 | 0.008238251 | 0.051916041 | 0.004278125 | -0.049431432 | 0.002660378  | TGFA                   |
| chr2  | 176980837 | 176981654 | 818  | * | 9  | 5.05935E-09 | 0.129907377 | 0.051967034 | 0.018658383 | 0.054389264  | 0.028501775  | HOXD10                 |
| chr7  | 96654548  | 96654832  | 285  | * | 7  | 1.02214E-07 | 0.020821899 | 0.052032447 | 0.01862629  | 0.055425178  | 0.028977694  |                        |
| chr17 | 61819073  | 61819520  | 448  | * | 8  | 4.68435E-08 | 0.081779629 | 0.052038525 | 0.041953788 | 0.031587808  | 0.001468991  | STRADA, RP11-51F16.8   |
| chr9  | 36276879  | 36277154  | 276  | * | 5  | 1.42125E-07 | 0.001628263 | 0.052077072 | 0.005960786 | -0.228631375 | -0.149508311 | CLTA, GNE              |
| chr22 | 41697229  | 41698001  | 773  | * | 8  | 1.64996E-10 | 0.003315021 | 0.052123629 | 0.003784061 | -0.064834754 | -0.023503088 | ZC3H7B                 |
| chr20 | 61463757  | 61464168  | 412  | * | 4  | 8.21631E-08 | 0.002458296 | 0.052146366 | 0.007010582 | -0.092344008 | -0.062433448 | COL9A3                 |
| chr3  | 181428046 | 181430485 | 2440 | * | 28 | 2.82874E-18 | 5.3687E-06  | 0.052173274 | 1.16332E-05 | -0.078387847 | 0.017414084  | SOX2-OT, SOX2          |
| chr14 | 70654824  | 70655056  | 233  | * | 2  | 7.51028E-09 | 0.012030603 | 0.052209863 | 0.020418422 | -0.095440442 | -0.061835907 | RP11-486O13.2, SLC8A3  |
| chr2  | 232348334 | 232348794 | 461  | * | 5  | 1.7461E-08  | 0.002616043 | 0.052252952 | 0.005206868 | -0.109537909 | -0.080538048 | NCL                    |
| chr5  | 72740460  | 72740748  | 289  | * | 5  | 2.64157E-08 | 0.022192264 | 0.052268522 | 0.016343597 | 0.090344269  | 0.044317831  | FOXD1                  |
| chr8  | 72756058  | 72757004  | 947  | * | 13 | 6.37552E-10 | 0.053549051 | 0.052283193 | 0.037450559 | 0.111614107  | 0.01266688   | RP11-383H13.1, MSC     |
| chr10 | 15901712  | 15902731  | 1020 | * | 13 | 2.47556E-10 | 0.410410227 | 0.052320167 | 0.097966678 | -0.053415346 | -0.002510039 | FAM188A                |
| chr3  | 53164314  | 53165031  | 718  | * | 10 | 1.88249E-09 | 0.047357872 | 0.052335403 | 0.025062735 | -0.053944333 | -0.00990415  | RFT1                   |
| chr20 | 42219091  | 42219578  | 488  | * | 6  | 1.08046E-08 | 0.004771122 | 0.052335723 | 0.011142949 | -0.054761036 | -0.025633372 | IFT52                  |
| chr17 | 79859809  | 79859999  | 191  | * | 8  | 3.72848E-09 | 0.018829685 | 0.05234345  | 0.01128136  | 0.067620263  | 0.032618513  | NPB, PCYT2             |
| chr20 | 21494547  | 21495476  | 930  | * | 11 | 1.15068E-08 | 0.260718989 | 0.052371811 | 0.043382387 | 0.047270694  | 0.010729526  | NKX2-2                 |
| chr4  | 42399792  | 42400116  | 325  | * | 6  | 1.21454E-07 | 0.032220196 | 0.052435422 | 0.047413955 | 0.029755196  | 0.016553921  | SHISA3                 |
| chr11 | 796069    | 796607    | 539  | * | 8  | 9.53816E-10 | 0.011012484 | 0.052477594 | 0.010201628 | 0.0319034    | 0.006585457  | SLC25A22               |
| chr19 | 54693250  | 54694922  | 1673 | * | 27 | 6.4382E-13  | 0.020234153 | 0.052528761 | 0.02244793  | -0.065723248 | -0.015234008 | TSEN34, MBOAT7         |
| chr2  | 200320750 | 200322034 | 1285 | * | 12 | 9.52945E-10 | 0.019520056 | 0.052597506 | 0.008865587 | -0.036975828 | 0.007044188  | SATB2                  |



|       |           |           |      |   |    |             |             |             |             |              |              |                                |
|-------|-----------|-----------|------|---|----|-------------|-------------|-------------|-------------|--------------|--------------|--------------------------------|
| chr6  | 29795501  | 29796614  | 1114 | * | 14 | 5.75588E-14 | 0.000984791 | 0.052769321 | 0.003021375 | 0.11300819   | 0.042729028  | HLA-G, HCG4P8                  |
| chr17 | 43044987  | 43045386  | 400  | * | 4  | 7.12116E-08 | 0.06781225  | 0.052783819 | 0.043952623 | 0.055621852  | 0.037072197  | C1QL1                          |
| chr19 | 18942465  | 18942619  | 155  | * | 5  | 1.19552E-07 | 0.010904221 | 0.05284059  | 0.012829846 | -0.023770123 | -0.010848123 |                                |
| chr1  | 45138784  | 45140869  | 2086 | * | 17 | 1.56017E-12 | 0.034912886 | 0.052941066 | 0.003219887 | -0.072878297 | 0.001762121  | C1orf228, TMEM53               |
| chr19 | 40971204  | 40972683  | 1480 | * | 17 | 1.04196E-15 | 0.000547005 | 0.052967276 | 0.000963736 | 0.128382018  | 0.011754924  | SPTBN4, BLVRB                  |
| chr5  | 52285480  | 52285560  | 81   | * | 2  | 3.51307E-08 | 0.099150824 | 0.053053511 | 0.077950175 | -0.043533283 | -0.029494526 | ITGA2, CTD-2175A23.1           |
| chr2  | 61765360  | 61765778  | 419  | * | 7  | 1.51842E-08 | 0.179862646 | 0.053070471 | 0.030338637 | 0.031773032  | 0.011010158  | XPO1                           |
| chr2  | 162093969 | 162095662 | 1694 | * | 10 | 1.19518E-10 | 8.03861E-05 | 0.053165174 | 0.000363791 | 0.242777004  | 0.046716764  | AC009299.2                     |
| chr8  | 21882104  | 21882942  | 839  | * | 7  | 7.23118E-10 | 0.01068302  | 0.053192113 | 0.011149856 | 0.138225794  | 0.047090862  | NPM2                           |
| chr6  | 28889682  | 28891917  | 2236 | * | 47 | 4.84514E-19 | 0.372089932 | 0.053200162 | 0.035265526 | -0.134386766 | -0.005574765 | TRIM27                         |
| chr19 | 14639450  | 14640867  | 1418 | * | 19 | 4.87346E-12 | 0.203658658 | 0.053289471 | 0.058102773 | -0.12520792  | -0.009072464 | TECR, MIR639, DNAJB1           |
| chr15 | 41408316  | 41409215  | 900  | * | 11 | 2.13126E-10 | 0.005536955 | 0.053333354 | 0.01101252  | 0.032570008  | 0.00811727   | INO80                          |
| chr10 | 134362678 | 134362785 | 108  | * | 3  | 8.05939E-09 | 0.002647385 | 0.053425191 | 0.007457872 | 0.082026923  | 0.06319328   | INPP5A                         |
| chr14 | 55737596  | 55738545  | 950  | * | 13 | 4.10204E-12 | 0.047734386 | 0.053470174 | 0.023885815 | 0.070387069  | 0.013664822  | FBXO34, RP11-665C16.6          |
| chr10 | 12391591  | 12391835  | 245  | * | 5  | 4.09568E-08 | 0.028659524 | 0.053509375 | 0.010450619 | -0.052004933 | 0.008236411  | CAMK1D                         |
| chr19 | 36630543  | 36631318  | 776  | * | 12 | 1.69155E-09 | 0.007991051 | 0.053603436 | 0.016775722 | 0.023543732  | 0.001647623  | CAPNS1                         |
| chr7  | 129781152 | 129781681 | 530  | * | 5  | 6.54015E-08 | 0.002748656 | 0.05361511  | 0.007843347 | -0.067567927 | -0.030862561 | RP11-775D22.2                  |
| chr6  | 8064622   | 8064764   | 143  | * | 4  | 5.98471E-08 | 0.001414379 | 0.053638192 | 0.005105191 | -0.073489375 | -0.025048397 | BLOC1S5, EEF1E1-BLOC1S5        |
| chr1  | 38455263  | 38455987  | 725  | * | 12 | 3.28914E-10 | 0.014509691 | 0.053653691 | 0.013413265 | -0.061729119 | -0.00714384  | SF3A3                          |
| chr6  | 28603161  | 28603779  | 619  | * | 11 | 1.11114E-09 | 0.18929402  | 0.053674254 | 0.125669783 | 0.030466514  | 0.015799235  |                                |
| chr19 | 2096331   | 2096346   | 16   | * | 3  | 1.88086E-07 | 0.342207599 | 0.053684075 | 0.142136426 | -0.007635128 | -0.004872552 | MOB3A                          |
| chr1  | 224622417 | 224622855 | 439  | * | 7  | 3.10071E-08 | 0.333784829 | 0.053714098 | 0.105811136 | 0.030397579  | 0.000392403  | CNIH3, WDR26                   |
| chr8  | 145700190 | 145701245 | 1056 | * | 7  | 5.81851E-10 | 0.000948199 | 0.053719821 | 0.003292693 | 0.155482464  | 0.050754914  | FOXH1                          |
| chr17 | 74136758  | 74137769  | 1012 | * | 8  | 3.2517E-09  | 0.01380937  | 0.053822485 | 0.005638493 | -0.058755581 | -0.012254424 | RNF157-AS1, FOXJ1              |
| chr16 | 54963754  | 54964029  | 276  | * | 2  | 1.88487E-07 | 0.01316582  | 0.05382476  | 0.022080523 | -0.037836873 | -0.007400797 |                                |
| chr1  | 38413252  | 38413374  | 123  | * | 3  | 1.90497E-08 | 0.003565103 | 0.05386185  | 0.009285703 | 0.086974081  | 0.077169067  |                                |
| chr1  | 32110078  | 32111281  | 1204 | * | 19 | 1.28504E-11 | 0.135197412 | 0.053904465 | 0.034720972 | 0.10266787   | 0.00690026   | RP11-73M7.6, RP11-73M7.9, PEF1 |
| chr19 | 45349207  | 45349903  | 697  | * | 9  | 1.1645E-10  | 0.002338494 | 0.053948554 | 0.006158264 | -0.064455491 | -0.031646025 | PVRL2                          |
| chr1  | 113615644 | 113616366 | 723  | * | 9  | 7.29258E-09 | 0.040194    | 0.05395806  | 0.020468093 | -0.069235912 | -0.000865385 | LRIG2, RP11-31F15.2            |

|       |           |           |      |   |    |             |             |             |             |              |              |                              |
|-------|-----------|-----------|------|---|----|-------------|-------------|-------------|-------------|--------------|--------------|------------------------------|
| chr15 | 68498457  | 68498589  | 133  | * | 2  | 1.23749E-07 | 0.032193401 | 0.054037662 | 0.041726685 | -0.071241157 | -0.05116681  | RP11-315D16.2                |
| chr20 | 19866743  | 19867423  | 681  | * | 9  | 1.62343E-09 | 0.033714617 | 0.054460951 | 0.013740967 | 0.145888511  | 0.061328948  | RIN2                         |
| chr1  | 202317604 | 202318195 | 592  | * | 8  | 2.24754E-10 | 0.003511056 | 0.054469748 | 0.002695682 | -0.040698082 | -0.002069474 | PPP1R12B                     |
| chr1  | 48937016  | 48937445  | 430  | * | 4  | 1.50121E-08 | 0.009777335 | 0.054577036 | 0.011844345 | -0.070731195 | -0.033830401 | SPATA6                       |
| chr2  | 173420763 | 173421844 | 1082 | * | 14 | 5.2441E-13  | 0.001539016 | 0.05458516  | 0.002354127 | -0.158465908 | -0.008660503 | PKD1, AC093818.1             |
| chr4  | 99181856  | 99182242  | 387  | * | 4  | 5.729E-08   | 0.124598942 | 0.0545917   | 0.106453093 | 0.023913882  | 0.000369231  | RP11-323J4.1                 |
| chr21 | 45758354  | 45758395  | 42   | * | 3  | 7.97184E-08 | 0.009957015 | 0.054660286 | 0.019348715 | -0.048388732 | -0.044010881 | C21orf2                      |
| chr6  | 152489392 | 152489702 | 311  | * | 5  | 2.43693E-08 | 0.000542042 | 0.054668325 | 0.00287234  | 0.124747541  | 0.085101574  | SYNE1                        |
| chr17 | 73390116  | 73390197  | 82   | * | 2  | 9.83412E-08 | 0.017567632 | 0.054728359 | 0.027537689 | 0.039377271  | 0.008712724  | GRB2                         |
| chr16 | 75600378  | 75600717  | 340  | * | 5  | 2.73301E-08 | 0.001979649 | 0.054780307 | 0.006156724 | 0.025864728  | 0.01144922   | GABARAPL2, RP11-77K12.8      |
| chr22 | 29137385  | 29138453  | 1069 | * | 15 | 7.12507E-10 | 0.02257283  | 0.054839122 | 0.01909709  | 0.065442047  | 0.004509603  | HSCB, CHEK2                  |
| chr2  | 172947914 | 172949870 | 1957 | * | 12 | 2.64327E-10 | 0.000327279 | 0.054855833 | 0.001471181 | 0.103164498  | 0.022203036  | DLX1                         |
| chr1  | 111506233 | 111507160 | 928  | * | 16 | 2.47008E-13 | 0.015374993 | 0.054863724 | 0.010626049 | 0.100220407  | -0.009920134 | RP11-96K19.5, LRIF1          |
| chr10 | 134350658 | 134351765 | 1108 | * | 10 | 3.42413E-12 | 0.000966625 | 0.054910369 | 0.001932013 | -0.062021119 | -0.022532514 | INPP5A                       |
| chr21 | 37528663  | 37528972  | 310  | * | 4  | 4.94788E-08 | 0.001263669 | 0.054933369 | 0.004844096 | -0.052626447 | -0.030545104 |                              |
| chr8  | 10697017  | 10697698  | 682  | * | 9  | 2.50235E-10 | 0.041982772 | 0.05494425  | 0.0149146   | 0.036073133  | 0.010073828  | SOX7, SOX7, PINX1            |
| chr12 | 80328163  | 80328999  | 837  | * | 6  | 3.81799E-09 | 0.079569513 | 0.054963445 | 0.049509752 | -0.057191582 | -0.006735465 | RP11-84G21.1, PPP1R12A       |
| chr5  | 132201652 | 132203292 | 1641 | * | 20 | 1.93755E-12 | 0.014932129 | 0.05498591  | 0.003790739 | 0.081043835  | -5.75143E-05 | UQCRO, GDF9                  |
| chr10 | 22633916  | 22635028  | 1113 | * | 14 | 5.65732E-12 | 0.014902885 | 0.055009583 | 0.011817755 | 0.076555837  | 0.031193428  | SPAG6                        |
| chr3  | 169381055 | 169381522 | 468  | * | 5  | 9.38401E-09 | 0.157477846 | 0.055082799 | 0.027008285 | -0.060106535 | -0.014794512 | MECOM                        |
| chr11 | 68670746  | 68671486  | 741  | * | 9  | 8.73598E-10 | 0.022177121 | 0.055132627 | 0.007796962 | 0.111214412  | 0.031824252  | IGHMBP2, MRPL21              |
| chr20 | 43935283  | 43935551  | 269  | * | 9  | 1.0876E-07  | 0.016657163 | 0.055297629 | 0.03814846  | 0.081177246  | 0.042797609  | RBPJL, MATN4                 |
| chr6  | 13272885  | 13273147  | 263  | * | 4  | 4.11596E-09 | 0.000864055 | 0.055341227 | 0.003650471 | -0.069508735 | -0.061018656 | PHACTR1, RP1-257A7.4, TBC1D7 |
| chr15 | 101084507 | 101085388 | 882  | * | 11 | 7.30506E-13 | 0.000130686 | 0.055368292 | 0.00098936  | 0.204199586  | 0.114481148  | CERS3                        |
| chr8  | 21645807  | 21646309  | 503  | * | 6  | 3.02605E-08 | 0.033259489 | 0.055448345 | 0.022238485 | 0.038890442  | 0.01800915   | GFRA2                        |
| chr4  | 107237103 | 107238654 | 1552 | * | 14 | 8.7768E-12  | 0.023177517 | 0.055464189 | 0.002905636 | -0.054640919 | -0.006998442 | AIMP1, TBCK                  |
| chr10 | 27443031  | 27444140  | 1110 | * | 12 | 1.08339E-11 | 0.018733649 | 0.055474173 | 0.01009279  | -0.030966238 | -0.006254969 | MASTL, YME1L1                |
| chr10 | 5406543   | 5407119   | 577  | * | 9  | 3.77656E-08 | 0.327011043 | 0.055492966 | 0.057619108 | 0.121531812  | 0.036207839  | UCN3                         |
| chr9  | 35665143  | 35665465  | 323  | * | 4  | 1.68784E-07 | 0.081250802 | 0.055494667 | 0.051040494 | 0.013820847  | 0.008472147  | ARHGEF39                     |

|       |           |           |      |   |    |             |             |             |             |              |              |                     |
|-------|-----------|-----------|------|---|----|-------------|-------------|-------------|-------------|--------------|--------------|---------------------|
| chr4  | 2795105   | 2795705   | 601  | * | 7  | 1.95794E-09 | 0.001290289 | 0.055496437 | 0.00458169  | -0.090736843 | -0.025408103 | SH3BP2              |
| chr1  | 8484004   | 8484703   | 700  | * | 11 | 1.1336E-09  | 0.008178304 | 0.055500147 | 0.013766511 | -0.130587854 | -0.036633168 | RERE                |
| chr5  | 133512410 | 133513291 | 882  | * | 11 | 1.71575E-09 | 0.041290171 | 0.055527486 | 0.034651486 | -0.082032246 | -0.011363669 | SKP1, CTD-2410N18.5 |
| chr6  | 90538851  | 90539804  | 954  | * | 11 | 6.46444E-11 | 0.01621992  | 0.055556279 | 0.011728729 | -0.027554657 | -0.004449177 | CASP8AP2            |
| chr19 | 7745377   | 7745524   | 148  | * | 3  | 7.20793E-08 | 0.004413233 | 0.055575228 | 0.010920646 | 0.028178188  | 0.005925079  | CTD-3214H19.16      |
| chr7  | 75677497  | 75677766  | 270  | * | 3  | 6.77713E-08 | 0.243892878 | 0.055665145 | 0.140396744 | 0.018415561  | 0.005547352  | MDH2                |
| chr1  | 118471375 | 118473064 | 1690 | * | 20 | 1.08897E-15 | 0.000350631 | 0.055703474 | 0.000720605 | -0.074342928 | -0.015726336 | WDR3, GDAP2         |
| chr2  | 239008705 | 239009246 | 542  | * | 8  | 2.11408E-09 | 0.004412976 | 0.055773248 | 0.010062026 | 0.16200158   | 0.074910462  | ESPNL               |
| chr18 | 35145353  | 35147276  | 1924 | * | 30 | 2.16359E-19 | 0.016158405 | 0.055796495 | 0.001535986 | 0.049266882  | 0.008511724  | CELF4               |
| chr15 | 52970418  | 52971596  | 1179 | * | 9  | 1.14269E-10 | 0.000623612 | 0.055813155 | 0.00267611  | 0.057872446  | -0.021333126 | FAM214A             |
| chr1  | 153755803 | 153756397 | 595  | * | 7  | 1.35846E-09 | 0.005847422 | 0.055830413 | 0.003515708 | -0.093237216 | -0.028190874 |                     |
| chr19 | 33071683  | 33072230  | 548  | * | 6  | 3.86396E-08 | 0.092239682 | 0.055830803 | 0.044909636 | -0.097573026 | -0.0173334   | PDCD5               |
| chr1  | 113932889 | 113934059 | 1171 | * | 14 | 6.08109E-11 | 0.003875186 | 0.055906104 | 0.006381297 | -0.042797326 | 0.00648974   | MAGI3               |
| chr15 | 76628725  | 76629771  | 1047 | * | 8  | 9.41589E-09 | 0.030621241 | 0.055949592 | 0.0121793   | 0.064540557  | 0.011522503  | ISL2                |
| chr17 | 36719518  | 36719773  | 256  | * | 5  | 6.43543E-08 | 0.002161313 | 0.055986295 | 0.00629238  | 0.068158185  | 0.037381186  | SRCIN1              |
| chr8  | 143581070 | 143581481 | 412  | * | 2  | 6.56042E-08 | 0.020022308 | 0.056064319 | 0.030536946 | 0.137671899  | 0.113655006  | BAI1                |
| chr15 | 45670406  | 45671028  | 623  | * | 10 | 1.26208E-08 | 0.309681491 | 0.056203709 | 0.104348238 | 0.017545747  | 0.003564309  | GATM                |
| chr1  | 111746640 | 111748268 | 1629 | * | 14 | 7.56077E-17 | 0.00073278  | 0.056211587 | 0.000741663 | -0.118325405 | -0.036855766 | CHI3L2, DENND2D     |
| chr10 | 96161300  | 96162988  | 1689 | * | 14 | 2.05284E-13 | 0.000444491 | 0.056228813 | 0.001628305 | -0.099129819 | 0.002107927  | TBC1D12             |
| chr1  | 180471735 | 180472686 | 952  | * | 9  | 1.83659E-08 | 0.064527824 | 0.056374076 | 0.086585842 | -0.097229371 | -0.021628892 | ACBD6               |
| chr20 | 3749406   | 3749756   | 351  | * | 4  | 2.47453E-08 | 0.001430017 | 0.056395501 | 0.005370905 | 0.048035771  | 0.012978961  |                     |
| chr5  | 31531945  | 31532116  | 172  | * | 3  | 2.19183E-08 | 0.027720391 | 0.056423201 | 0.030337371 | 0.015366549  | 0.012223134  | DROSHA              |
| chr3  | 56835282  | 56836259  | 978  | * | 7  | 6.41859E-09 | 0.014765776 | 0.056495459 | 0.010953419 | 0.148747699  | 0.029132862  | ARHGEF3             |
| chr1  | 109203901 | 109204654 | 754  | * | 10 | 3.03979E-10 | 0.049765355 | 0.056556046 | 0.026699198 | 0.076505621  | 0.016831061  | HENMT1              |
| chr1  | 197743842 | 197745295 | 1454 | * | 20 | 2.4362E-12  | 0.034510775 | 0.056601719 | 0.012365218 | -0.123340877 | -0.005528616 | DENND1B             |
| chr12 | 9102068   | 9103184   | 1117 | * | 14 | 1.28687E-12 | 0.016625492 | 0.056636377 | 0.004444205 | -0.054768683 | -0.001614391 | KLRG1, M6PR         |
| chr7  | 145813413 | 145813946 | 534  | * | 8  | 5.10036E-09 | 0.021483144 | 0.056641326 | 0.009185065 | 0.052482158  | 0.011330677  | CNTNAP2             |
| chr22 | 44287485  | 44288659  | 1175 | * | 15 | 3.18097E-13 | 0.166672618 | 0.056678149 | 0.008970953 | 0.120320582  | 0.024454966  | PNPLA5              |
| chr1  | 202113040 | 202114133 | 1094 | * | 12 | 3.93741E-12 | 0.0062907   | 0.056738623 | 0.003238514 | -0.092744271 | 0.000193124  | ARL8A               |

|       |           |           |      |   |    |             |             |             |             |              |              |                         |
|-------|-----------|-----------|------|---|----|-------------|-------------|-------------|-------------|--------------|--------------|-------------------------|
| chr19 | 18747598  | 18748017  | 420  | * | 8  | 3.43792E-09 | 0.01467467  | 0.056819811 | 0.018701402 | -0.056045729 | -0.028723419 | KLHL26                  |
| chr2  | 136288315 | 136289456 | 1142 | * | 14 | 1.39244E-15 | 0.026033929 | 0.056838941 | 0.002976845 | -0.049473857 | -0.016556566 | R3HDM1, ZRANB3          |
| chr2  | 208989209 | 208990238 | 1030 | * | 12 | 7.1415E-11  | 0.04565386  | 0.056935659 | 0.022379094 | -0.143635121 | -0.026931031 | CRYGD                   |
| chr5  | 153825063 | 153826017 | 955  | * | 10 | 1.65162E-09 | 0.024407186 | 0.057124018 | 0.009223347 | -0.130435018 | -0.019673585 | SAP30L, SAP30L-AS1      |
| chr6  | 24645875  | 24646551  | 677  | * | 13 | 1.25281E-09 | 0.453680149 | 0.05716618  | 0.082839774 | -0.038863584 | 0.002914736  | KIAA0319                |
| chr2  | 47403193  | 47403831  | 639  | * | 5  | 2.40816E-11 | 0.015222439 | 0.05718356  | 0.020820644 | -0.078090942 | -0.047472721 | RP11-761B3.1, CALM2     |
| chr12 | 64615340  | 64616385  | 1046 | * | 14 | 1.0736E-12  | 0.002516343 | 0.0571962   | 0.002133879 | -0.048571954 | 0.00535235   | RPS11P6, C12orf66       |
| chr17 | 27621110  | 27621314  | 205  | * | 7  | 1.73985E-07 | 0.005073739 | 0.057305733 | 0.009722521 | -0.045895934 | -0.007925309 | NUFIP2                  |
| chr2  | 109402797 | 109403293 | 497  | * | 11 | 1.7424E-08  | 0.174358613 | 0.05733492  | 0.053336994 | -0.030562945 | -0.003698549 | CCDC138                 |
| chr2  | 43822965  | 43823287  | 323  | * | 7  | 4.65095E-08 | 0.023541088 | 0.057336349 | 0.029206361 | 0.02472765   | 0.007520961  | THADA                   |
| chr8  | 53852101  | 53852661  | 561  | * | 7  | 1.31281E-08 | 0.002238972 | 0.057396944 | 0.00725582  | -0.043628772 | -0.0085365   | NPBWR1                  |
| chr20 | 34287144  | 34288088  | 945  | * | 8  | 8.35193E-09 | 0.055048731 | 0.057435016 | 0.040880204 | 0.104785622  | 0.01597044   | ROMO1, NFS1             |
| chr7  | 65669728  | 65670474  | 747  | * | 10 | 1.30534E-08 | 0.162400882 | 0.057495208 | 0.057487335 | -0.051285526 | -0.003473869 | TPST1                   |
| chr6  | 33284839  | 33286244  | 1406 | * | 15 | 6.30915E-11 | 0.008644405 | 0.0574969   | 0.015294751 | 0.112792081  | 0.004661335  | ZBTB22                  |
| chr1  | 213188705 | 213189823 | 1119 | * | 16 | 9.53259E-11 | 0.160810071 | 0.057648483 | 0.039123031 | -0.121542489 | -0.013470509 | ANGEL2                  |
| chr14 | 103058097 | 103059453 | 1357 | * | 14 | 5.46975E-11 | 0.037912046 | 0.057772274 | 0.017332474 | -0.042802796 | -0.003280121 | RCOR1                   |
| chr10 | 135050619 | 135052004 | 1386 | * | 24 | 5.59936E-18 | 0.001531892 | 0.05783031  | 0.00557839  | 0.137565511  | 0.034029831  | VENTX                   |
| chr11 | 8986094   | 8987427   | 1334 | * | 16 | 7.23432E-09 | 0.127300907 | 0.057843435 | 0.039000589 | -0.119080427 | -0.002121497 | TMEM9B-AS1, TMEM9B      |
| chr17 | 63557609  | 63558518  | 910  | * | 9  | 1.85098E-09 | 0.000588341 | 0.057883301 | 0.002988342 | 0.113004967  | 0.03114343   | AXIN2, CTD-2535L24.2    |
| chr2  | 73460340  | 73461528  | 1189 | * | 16 | 5.70278E-11 | 0.032595876 | 0.057908329 | 0.016940827 | -0.021625219 | -6.89144E-06 | CCT7, PRADC1            |
| chr15 | 58357874  | 58357989  | 116  | * | 7  | 1.37136E-07 | 0.146665498 | 0.057937665 | 0.058887499 | 0.083795591  | 0.028275476  | CTD-2330J20.2, ALDH1A2  |
| chr16 | 57405979  | 57406074  | 96   | * | 3  | 1.60462E-07 | 0.024824406 | 0.057961868 | 0.029381662 | 0.12598325   | 0.074553235  |                         |
| chr1  | 203733914 | 203734559 | 646  | * | 9  | 2.84368E-09 | 0.016245102 | 0.058020919 | 0.014974039 | 0.097086833  | 0.046641823  | LAX1                    |
| chr1  | 28969288  | 28970259  | 972  | * | 14 | 9.11758E-10 | 0.05433977  | 0.058051618 | 0.031688551 | -0.036331825 | -0.004967769 | RP11-442N24__B.1, TAF12 |
| chr1  | 185286441 | 185286607 | 167  | * | 4  | 3.67532E-08 | 0.003837246 | 0.05808501  | 0.01042639  | -0.088423313 | -0.024627729 | IVNS1ABP                |
| chr2  | 220042748 | 220043530 | 783  | * | 9  | 1.47682E-09 | 0.002564789 | 0.058097326 | 0.006524102 | 0.011873373  | 0.002910323  | FAM134A, CNPPD1         |
| chr15 | 51057417  | 51058141  | 725  | * | 11 | 4.22255E-10 | 0.028798315 | 0.058195052 | 0.014422096 | -0.042550485 | -0.011501954 | SPPL2A                  |
| chr1  | 211306365 | 211307563 | 1199 | * | 11 | 4.32052E-09 | 0.01322313  | 0.058216397 | 0.013671786 | -0.075482368 | 0.0059712    | KCNH1, KCNH1-IT1        |
| chr2  | 74405770  | 74406553  | 784  | * | 12 | 3.39417E-09 | 0.027829473 | 0.058283549 | 0.020400358 | 0.099540693  | -0.003882469 | MOB1A                   |

|       |           |           |      |   |    |             |             |             |             |              |              |                              |
|-------|-----------|-----------|------|---|----|-------------|-------------|-------------|-------------|--------------|--------------|------------------------------|
| chr18 | 12377377  | 12378044  | 668  | * | 9  | 7.20671E-13 | 0.013366754 | 0.058377887 | 0.007436375 | -0.073511844 | -0.025866681 |                              |
| chr20 | 35580059  | 35580258  | 200  | * | 6  | 2.5244E-08  | 0.014465406 | 0.05841215  | 0.011605673 | 0.018803921  | 0.00809168   | SAMHD1                       |
| chr17 | 75136729  | 75137495  | 767  | * | 9  | 1.76963E-10 | 0.003744802 | 0.058441926 | 0.005197459 | -0.07373521  | -0.034577997 | SEC14L1                      |
| chr12 | 14996143  | 14996776  | 634  | * | 10 | 3.70639E-11 | 0.02210493  | 0.058487804 | 0.007976796 | 0.15769546   | 0.06272403   | C12orf60, RP11-233G1.4, ART4 |
| chr3  | 14692357  | 14693598  | 1242 | * | 10 | 2.51357E-11 | 0.000561507 | 0.058600068 | 0.002086893 | 0.06425881   | 0.01762038   | CCDC174                      |
| chr12 | 112204136 | 112204761 | 626  | * | 10 | 2.878E-08   | 0.071726933 | 0.058615155 | 0.036850271 | 0.044056573  | 0.013058421  | RP11-162P23.2, ALDH2         |
| chr2  | 21022431  | 21023042  | 612  | * | 11 | 6.11431E-10 | 0.016563963 | 0.058631786 | 0.014705564 | 0.022181589  | 0.008196884  | C2orf43                      |
| chr3  | 48723293  | 48724305  | 1013 | * | 7  | 4.26957E-08 | 0.009854937 | 0.058643702 | 0.012796609 | 0.100126848  | 0.017576535  | NCKIPSD                      |
| chr16 | 19566400  | 19567590  | 1191 | * | 15 | 3.50912E-12 | 0.01065315  | 0.058683618 | 0.006187429 | 0.065698908  | 0.009391362  | C16orf62                     |
| chr4  | 960520    | 961658    | 1139 | * | 7  | 4.27977E-10 | 0.004893042 | 0.058699393 | 0.00565593  | -0.191671232 | -0.058330381 | DGKQ                         |
| chr1  | 34632402  | 34632588  | 187  | * | 5  | 9.00159E-08 | 0.021600902 | 0.058732021 | 0.016858874 | 0.09599694   | 0.026963343  | C1orf94                      |
| chr19 | 18450967  | 18451650  | 684  | * | 15 | 1.68498E-09 | 0.061452837 | 0.058757295 | 0.053714281 | -0.052702378 | 0.004880211  | PGPEP1                       |
| chr1  | 167522981 | 167523555 | 575  | * | 9  | 4.1015E-08  | 0.024686902 | 0.058799816 | 0.023939    | -0.047067422 | -0.006959549 | CREG1                        |
| chr7  | 113722758 | 113724153 | 1396 | * | 10 | 2.23463E-10 | 0.000399882 | 0.058827317 | 0.001803971 | 0.099082255  | 0.023204832  |                              |
| chr12 | 122326914 | 122327438 | 525  | * | 5  | 1.1757E-09  | 0.006728696 | 0.058838609 | 0.011886525 | 0.054336408  | 0.019072597  | PSMD9, RP11-87C12.2          |
| chr6  | 16238547  | 16239574  | 1028 | * | 9  | 7.07849E-12 | 0.037636258 | 0.058840957 | 0.027076439 | -0.053775712 | -0.003797273 | GMPR                         |
| chr1  | 6453427   | 6454543   | 1117 | * | 16 | 1.42049E-12 | 0.019288242 | 0.058877133 | 0.015914594 | 0.067951296  | 0.001641062  | RP1-202O8.3, ACOT7           |
| chr6  | 24126060  | 24126497  | 438  | * | 10 | 4.38752E-10 | 0.095718805 | 0.058917173 | 0.01864072  | 0.067193633  | 0.025540685  | NRSN1                        |
| chr19 | 18529969  | 18529997  | 29   | * | 4  | 1.37139E-07 | 0.008947999 | 0.058950956 | 0.014351294 | -0.068996405 | -0.042273618 | SSBP4                        |
| chr4  | 56501718  | 56502116  | 399  | * | 4  | 9.0961E-09  | 0.038674153 | 0.058952782 | 0.024798076 | 0.0511804    | 0.01804917   | NMU                          |
| chr1  | 156560925 | 156561646 | 722  | * | 11 | 8.93945E-10 | 0.074725199 | 0.059006365 | 0.019843049 | 0.116344815  | 0.004201496  | APOA1BP                      |
| chr17 | 40687226  | 40687943  | 718  | * | 10 | 1.50624E-11 | 0.01682941  | 0.05905917  | 0.011722123 | 0.117335542  | 0.041562281  |                              |
| chr5  | 176433461 | 176434079 | 619  | * | 11 | 2.45838E-09 | 0.058431223 | 0.059132715 | 0.022299107 | -0.056598156 | -0.006556268 | UIMC1                        |
| chr3  | 196668656 | 196669655 | 1000 | * | 14 | 1.45863E-12 | 0.037920955 | 0.059205166 | 0.021475734 | -0.065474912 | -0.00627979  | NCBP2-AS1, NCBP2-AS2, NCBP2  |
| chr5  | 156569391 | 156570357 | 967  | * | 12 | 1.14024E-09 | 0.040998227 | 0.059218736 | 0.046220412 | -0.043449776 | -0.010989103 | ITK, HAVCR2, MED7            |
| chr20 | 46130313  | 46131144  | 832  | * | 14 | 1.84155E-09 | 0.03969069  | 0.059230176 | 0.044545651 | -0.031751329 | 0.000553758  | NCOA3                        |
| chr2  | 74648306  | 74648964  | 659  | * | 8  | 7.22719E-08 | 0.084114495 | 0.059322819 | 0.040434569 | -0.0266487   | -0.003727375 | WDR54, C2orf81               |
| chr2  | 43453251  | 43454950  | 1700 | * | 27 | 6.19654E-13 | 0.087109622 | 0.059440453 | 0.055912887 | -0.103896839 | -0.011819423 | THADA, ZFP36L2               |
| chr10 | 71211210  | 71211838  | 629  | * | 8  | 2.10923E-08 | 0.010785355 | 0.05944142  | 0.013613963 | 0.064498497  | 0.021097969  | TSPAN15                      |

|       |           |           |      |   |    |             |             |             |             |              |              |                                |
|-------|-----------|-----------|------|---|----|-------------|-------------|-------------|-------------|--------------|--------------|--------------------------------|
| chr22 | 19466632  | 19467810  | 1179 | * | 18 | 2.80275E-12 | 0.014365966 | 0.059471895 | 0.026780776 | -0.04878712  | -0.015627944 | CDC45, UFD1L                   |
| chr1  | 33502512  | 33503118  | 607  | * | 11 | 2.7853E-08  | 0.357979898 | 0.059478521 | 0.093599329 | -0.060871459 | -0.011958504 | AK2                            |
| chr1  | 112297799 | 112298991 | 1193 | * | 16 | 9.06188E-11 | 0.056225685 | 0.059483313 | 0.008007631 | -0.034433992 | 0.005372797  | DDX20, FAM212B                 |
| chr16 | 2563036   | 2564146   | 1111 | * | 17 | 9.08391E-10 | 0.149582926 | 0.059523023 | 0.094909325 | 0.099083303  | 0.012562298  | RP11-20123.1, ATP6VOC, ATP6C   |
| chr7  | 150102268 | 150103902 | 1635 | * | 10 | 4.56344E-11 | 0.002507403 | 0.059562246 | 0.004093045 | 0.069110534  | 0.017045413  | ZNF775                         |
| chr3  | 88108136  | 88108324  | 189  | * | 7  | 1.44031E-07 | 0.064772773 | 0.059588678 | 0.037665713 | -0.046989464 | -0.00727132  | CGGBP1                         |
| chr10 | 90342899  | 90343435  | 537  | * | 11 | 6.93173E-09 | 0.061682538 | 0.05959793  | 0.035282953 | 0.099096238  | 0.028585524  | RNLS                           |
| chr19 | 54057208  | 54058085  | 878  | * | 9  | 1.52765E-10 | 0.002484837 | 0.059636413 | 0.003209694 | -0.127957769 | -0.081729032 | ZNF331                         |
| chr11 | 1769152   | 1770066   | 915  | * | 9  | 6.62012E-13 | 5.29692E-05 | 0.059680431 | 0.000640176 | 0.208970042  | 0.106542514  | IFITM10, RP11-295K3.1          |
| chr15 | 74658981  | 74660563  | 1583 | * | 12 | 6.58358E-11 | 0.027148584 | 0.059705502 | 0.010815709 | 0.118415393  | 0.036438834  | CTD-2311M21.3, CYP11A1         |
| chr11 | 101981004 | 101981422 | 419  | * | 8  | 3.5809E-08  | 0.159728169 | 0.059734408 | 0.055113734 | -0.292573286 | -0.049177208 | YAP1                           |
| chr12 | 56694541  | 56694932  | 392  | * | 4  | 2.5987E-08  | 0.007505443 | 0.059825117 | 0.013023848 | 0.125627872  | 0.084476526  | RP11-977G19.11, RP11-977G19.10 |
| chr12 | 120555025 | 120555510 | 486  | * | 5  | 9.04701E-08 | 0.044917108 | 0.059919132 | 0.028796857 | -0.030278905 | 0.00131872   | RAB35                          |
| chr11 | 46354271  | 46354803  | 533  | * | 10 | 1.83136E-08 | 0.209918557 | 0.059920501 | 0.095017956 | 0.047463335  | 0.011710065  | DGKZ                           |
| chr1  | 186649354 | 186649985 | 632  | * | 12 | 2.68238E-08 | 0.038125758 | 0.059945151 | 0.034319864 | -0.049824399 | -0.015078453 | RP5-973M2.2, PTGS2             |
| chr1  | 50886393  | 50887477  | 1085 | * | 8  | 6.05176E-12 | 6.64786E-05 | 0.060004674 | 0.000820964 | 0.079799285  | 0.051202523  | DMRTA2                         |
| chr5  | 54528989  | 54530114  | 1126 | * | 12 | 7.38775E-10 | 0.012771048 | 0.060022612 | 0.017424845 | -0.040217696 | 0.002797295  | RP11-506H20.1, CCNO            |
| chr10 | 1095317   | 1095578   | 262  | * | 6  | 8.0328E-08  | 0.012711476 | 0.060183633 | 0.019223596 | -0.045889282 | -0.013740579 | WDR37                          |
| chr14 | 78083170  | 78083524  | 355  | * | 5  | 6.08858E-08 | 0.009313767 | 0.060210187 | 0.010039464 | -0.022583403 | -0.002032049 |                                |
| chr5  | 102594123 | 102594617 | 495  | * | 6  | 8.25778E-09 | 0.026368826 | 0.060213157 | 0.009412934 | -0.039394622 | -0.005630504 | C5orf30                        |
| chr5  | 7868703   | 7869652   | 950  | * | 15 | 3.02423E-16 | 0.001999192 | 0.060236654 | 0.001363387 | -0.040410817 | 0.002533421  | MTRR, FASTKD3                  |
| chr1  | 101004934 | 101005509 | 576  | * | 5  | 2.72852E-08 | 0.001063113 | 0.060237226 | 0.004776847 | 0.051388804  | 0.021910093  | GPR88                          |
| chr15 | 82338222  | 82339233  | 1012 | * | 12 | 2.36943E-09 | 0.097207638 | 0.060273891 | 0.035932126 | -0.117445146 | -0.012136609 | MEX3B                          |
| chr1  | 114301549 | 114302602 | 1054 | * | 15 | 4.22594E-10 | 0.462845686 | 0.060316437 | 0.11318723  | 0.027566156  | 0.007148207  | PHTF1                          |
| chr6  | 27805693  | 27806393  | 701  | * | 10 | 7.7487E-10  | 0.022415703 | 0.060377124 | 0.007090888 | -0.095286938 | -0.017511293 | HIST1H2BN, HIST1H2AK           |
| chr6  | 29759947  | 29761288  | 1342 | * | 23 | 6.23995E-22 | 0.000622343 | 0.060401018 | 0.000410894 | 0.068203145  | 0.027616893  | HLA-V, HCG4                    |
| chr6  | 12011930  | 12013002  | 1073 | * | 11 | 1.01864E-09 | 0.023739654 | 0.060402711 | 0.027533405 | -0.050591784 | -0.022227003 | HIVEP1                         |
| chr8  | 124084365 | 124085299 | 935  | * | 13 | 2.79668E-11 | 0.02965215  | 0.060409324 | 0.015173398 | -0.10202822  | -0.020848484 | TBC1D31                        |
| chr11 | 34074141  | 34074400  | 260  | * | 4  | 3.29884E-08 | 0.002837992 | 0.060533921 | 0.009042879 | 0.032206712  | 0.018061048  | CAPRIN1                        |

|       |           |           |      |   |    |             |             |             |             |              |              |                        |
|-------|-----------|-----------|------|---|----|-------------|-------------|-------------|-------------|--------------|--------------|------------------------|
| chr17 | 36908879  | 36909310  | 432  | * | 8  | 4.24258E-08 | 0.085985416 | 0.060712186 | 0.054641319 | -0.042385768 | -0.007169083 | PSMB3                  |
| chr14 | 75469136  | 75469881  | 746  | * | 12 | 5.73287E-10 | 0.020866121 | 0.060716024 | 0.015947685 | -0.038108206 | 0.003939638  | EIF2B2                 |
| chr6  | 30538523  | 30540994  | 2472 | * | 35 | 4.11648E-12 | 0.124120073 | 0.06073241  | 0.028429947 | -0.115188331 | 0.000278429  | ABCF1                  |
| chr20 | 44746392  | 44747351  | 960  | * | 9  | 9.78043E-09 | 0.081614361 | 0.060835832 | 0.018421902 | -0.085631128 | 0.004384429  | CD40                   |
| chr2  | 61293079  | 61293725  | 647  | * | 9  | 7.36384E-09 | 0.103095106 | 0.06090766  | 0.050432441 | -0.044872541 | -0.000106872 | KIAA1841               |
| chr1  | 45987459  | 45987978  | 520  | * | 8  | 6.15721E-08 | 0.028999247 | 0.061036804 | 0.054202081 | -0.080409599 | -0.022820723 | PRDX1                  |
| chr19 | 1490631   | 1491289   | 659  | * | 7  | 2.51677E-09 | 0.014957142 | 0.06104537  | 0.014560538 | -0.077272192 | -0.003632791 | REEP6, PCSK4           |
| chr1  | 94883469  | 94884189  | 721  | * | 10 | 1.10734E-08 | 0.016952436 | 0.061145019 | 0.016333332 | 0.03475071   | 0.012791157  | ABCD3                  |
| chr2  | 25015152  | 25016582  | 1431 | * | 19 | 4.02815E-16 | 0.001634783 | 0.061216728 | 0.003250507 | -0.12169291  | -0.013137557 | CENPO, PTRHD1          |
| chr17 | 46178618  | 46179468  | 851  | * | 11 | 2.81387E-10 | 0.013307337 | 0.061281797 | 0.019699524 | 0.07752575   | 0.00375137   | CBX1                   |
| chr11 | 65029414  | 65030075  | 662  | * | 7  | 2.05044E-08 | 0.021079536 | 0.061351863 | 0.020101221 | 0.02329704   | 0.007217283  | POLA2                  |
| chr9  | 93563351  | 93564149  | 799  | * | 12 | 1.15128E-08 | 0.177790602 | 0.061365062 | 0.069536841 | -0.140794092 | -0.001507003 | SYK                    |
| chr1  | 16553267  | 16553549  | 283  | * | 5  | 7.73345E-08 | 0.002226021 | 0.061387121 | 0.006840005 | -0.073624307 | 0.027868432  | ANO7P1                 |
| chr3  | 42845813  | 42846188  | 376  | * | 8  | 4.79416E-09 | 0.079868562 | 0.061389478 | 0.030401804 | -0.098754074 | -0.016523746 | HIGD1A                 |
| chr18 | 33708920  | 33710235  | 1316 | * | 20 | 1.16475E-11 | 0.087480635 | 0.061443298 | 0.038162909 | 0.038294427  | 9.81564E-05  | ELP2, SLC39A6          |
| chr6  | 160209868 | 160210888 | 1021 | * | 13 | 5.60027E-13 | 0.001365244 | 0.061510424 | 0.003013261 | -0.073332169 | -0.004342416 | MRPL18, TCP1           |
| chr5  | 54603874  | 54603891  | 18   | * | 2  | 1.71651E-07 | 0.019917462 | 0.061532987 | 0.031427185 | -0.081098449 | -0.065943573 | SKIV2L2                |
| chr22 | 39101190  | 39102110  | 921  | * | 15 | 9.58198E-12 | 0.017624646 | 0.061535675 | 0.012769015 | -0.053829636 | -0.012536509 | GTPBP1                 |
| chr3  | 118864895 | 118865255 | 361  | * | 8  | 8.83378E-08 | 0.054158297 | 0.061572509 | 0.041538158 | 0.156315317  | 0.055059161  | C3orf30, IGSF11        |
| chr17 | 46125498  | 46126298  | 801  | * | 9  | 8.26972E-10 | 0.001062609 | 0.061587355 | 0.004628674 | -0.046850269 | -0.009679636 | NFE2L1                 |
| chr12 | 103889166 | 103890011 | 846  | * | 12 | 5.26414E-09 | 0.048903456 | 0.061634427 | 0.020881373 | -0.056455464 | -0.002046106 | C12orf42               |
| chr6  | 111279446 | 111280279 | 834  | * | 18 | 5.05325E-10 | 0.196717158 | 0.061659664 | 0.080735836 | -0.045378493 | -0.004731552 | GTF3C6                 |
| chr4  | 1399938   | 1400189   | 252  | * | 2  | 1.13566E-07 | 0.158793314 | 0.061743322 | 0.104488545 | 0.033167854  | 0.021688277  | NKX1-1                 |
| chr14 | 96000874  | 96001369  | 496  | * | 12 | 1.11352E-09 | 0.044612946 | 0.061777222 | 0.033752884 | 0.028349056  | 0.001346073  | GLRX5, SNHG10          |
| chr7  | 107384245 | 107384783 | 539  | * | 6  | 1.2739E-07  | 0.113055801 | 0.061835438 | 0.068899606 | -0.044066039 | 0.002929357  | CBLL1, AC002467.7      |
| chr19 | 3572410   | 3572957   | 548  | * | 10 | 3.98599E-08 | 0.149778531 | 0.061878782 | 0.04727734  | 0.031463192  | 0.002643097  | HMG20B, MFSD12         |
| chr16 | 31519926  | 31520645  | 720  | * | 7  | 3.10071E-08 | 0.08331844  | 0.062002673 | 0.034103714 | 0.092411235  | 0.019388913  | RP11-452L6.7, C16orf58 |
| chr6  | 33395005  | 33395936  | 932  | * | 9  | 2.90694E-09 | 0.030392491 | 0.062068989 | 0.022191579 | -0.042290453 | -0.014419922 | SYNGAP1                |
| chr20 | 62168764  | 62169334  | 571  | * | 8  | 1.60556E-08 | 0.009953664 | 0.062074204 | 0.016065463 | 0.065179944  | 0.01183376   |                        |

|       |           |           |      |   |    |             |             |             |             |              |              |                      |
|-------|-----------|-----------|------|---|----|-------------|-------------|-------------|-------------|--------------|--------------|----------------------|
| chr2  | 47629743  | 47630845  | 1103 | * | 13 | 2.96092E-11 | 0.019743367 | 0.062089818 | 0.009873274 | -0.038521797 | 4.12015E-05  | MSH2                 |
| chr3  | 160282993 | 160283655 | 663  | * | 11 | 3.36216E-08 | 0.049429039 | 0.062169322 | 0.050808449 | -0.03619045  | -0.002506253 | KRT8P12, KPNA4       |
| chr14 | 59654921  | 59656055  | 1135 | * | 12 | 1.01017E-09 | 0.029692931 | 0.062175727 | 0.020783706 | 0.016649321  | 0.00505528   | DAAM1                |
| chr12 | 110150904 | 110151678 | 775  | * | 5  | 1.3953E-09  | 0.011883722 | 0.062178864 | 0.016963308 | 0.133759508  | 0.052767814  |                      |
| chr9  | 115512278 | 115513756 | 1479 | * | 16 | 1.02892E-09 | 0.019653855 | 0.062286345 | 0.009200903 | 0.06837077   | 0.008904892  | SNX30, RP11-276E15.4 |
| chr12 | 14518526  | 14518974  | 449  | * | 7  | 2.17515E-08 | 0.002749632 | 0.062309321 | 0.005617175 | -0.065115452 | -0.020859011 | ATF7IP               |
| chr17 | 16283541  | 16284362  | 822  | * | 9  | 7.30156E-11 | 0.010146449 | 0.06233166  | 0.007778531 | -0.056883295 | -0.010074119 | UBB                  |
| chr8  | 65286244  | 65286632  | 389  | * | 6  | 3.44113E-08 | 0.013691374 | 0.062345455 | 0.032553645 | 0.042812168  | 0.022660081  | LINC00966            |
| chr2  | 170684197 | 170684455 | 259  | * | 2  | 4.85447E-08 | 0.018198944 | 0.062429434 | 0.029544951 | 0.036231386  | 0.014456735  | UBR3                 |
| chr13 | 23310464  | 23310675  | 212  | * | 3  | 1.6437E-07  | 0.0052326   | 0.062542748 | 0.01326796  | -0.14759776  | -0.121614559 |                      |
| chr1  | 16010601  | 16010732  | 132  | * | 3  | 4.35187E-08 | 0.006710593 | 0.06258558  | 0.015897777 | -0.069918741 | -0.051343735 |                      |
| chr6  | 41039639  | 41041678  | 2040 | * | 22 | 1.422E-21   | 3.1483E-05  | 0.062628553 | 3.96387E-05 | -0.065146045 | -0.013534486 | NFYA, OARD1          |
| chr8  | 38088736  | 38089439  | 704  | * | 11 | 5.6802E-09  | 0.536969467 | 0.062639797 | 0.126215639 | -0.054761146 | -0.012393591 | DDHD2                |
| chr12 | 109124574 | 109125017 | 444  | * | 7  | 1.66949E-08 | 0.056530924 | 0.062689462 | 0.022796692 | -0.090385747 | -0.039488    | CORO1C               |
| chr17 | 11900221  | 11901614  | 1394 | * | 13 | 1.22315E-12 | 0.00025431  | 0.062745067 | 0.002353656 | 0.078781559  | 0.009304422  | ZNF18                |
| chr3  | 145879084 | 145879710 | 627  | * | 11 | 9.45058E-11 | 0.018574788 | 0.062821694 | 0.011672424 | -0.194876675 | -0.04484927  | PLOD2                |
| chr3  | 130745160 | 130745959 | 800  | * | 19 | 3.82105E-10 | 0.063903266 | 0.062878418 | 0.047180127 | 0.038989999  | 0.002542488  | NEK11, ASTE1         |
| chr11 | 75525525  | 75526473  | 949  | * | 15 | 8.17862E-13 | 0.002672769 | 0.06290885  | 0.005960353 | -0.052144528 | -0.007137214 | UVRAG, RP11-535A19.2 |
| chr5  | 39074123  | 39075183  | 1061 | * | 13 | 6.64896E-11 | 0.052596497 | 0.06295245  | 0.02416152  | 0.022119257  | 0.002922944  | RICTOR               |
| chr11 | 63448356  | 63448992  | 637  | * | 11 | 1.35666E-12 | 0.046458772 | 0.062982494 | 0.006053788 | -0.086492374 | -0.002510294 | RTN3                 |
| chr1  | 53392650  | 53393560  | 911  | * | 12 | 7.73089E-10 | 0.371546836 | 0.063099102 | 0.176889835 | -0.058754834 | -0.000394958 | SCP2, ECHDC2         |
| chr14 | 105531855 | 105532252 | 398  | * | 8  | 1.58805E-08 | 0.011047353 | 0.063102938 | 0.016232747 | -0.050625312 | -0.019166531 |                      |
| chr6  | 30522620  | 30525447  | 2828 | * | 60 | 6.2238E-16  | 0.558610777 | 0.063132246 | 0.070090805 | 0.136986238  | -0.00102119  | PRR3, GNL1           |
| chr3  | 44380113  | 44380138  | 26   | * | 3  | 1.59745E-07 | 0.501192259 | 0.06313946  | 0.055687947 | 0.018994376  | 0.010757422  | TCAIM                |
| chr12 | 25055214  | 25056670  | 1457 | * | 17 | 1.00167E-15 | 0.00251281  | 0.063191099 | 0.001225776 | -0.047852022 | -0.000275214 | AC026310.1, BCAT1    |
| chr10 | 102899577 | 102899983 | 407  | * | 5  | 7.22245E-08 | 0.005334452 | 0.063220574 | 0.009675457 | 0.097559416  | 0.003346359  |                      |
| chr13 | 96328888  | 96329629  | 742  | * | 10 | 2.95656E-10 | 0.006129914 | 0.063233796 | 0.006999643 | -0.091941365 | -0.014225879 | DNAJC3, DNAJC3-AS1   |
| chr1  | 173445917 | 173446516 | 600  | * | 11 | 1.35622E-10 | 0.008648764 | 0.06325327  | 0.01258978  | -0.078937975 | -0.007898698 | PRDX6                |
| chr1  | 1369616   | 1370722   | 1107 | * | 9  | 1.94574E-09 | 0.0967982   | 0.063253632 | 0.064592936 | -0.058005347 | -0.020354879 | VWA1, RP4-758J18.10  |



|       |           |           |      |   |    |             |             |             |             |              |              |                                 |
|-------|-----------|-----------|------|---|----|-------------|-------------|-------------|-------------|--------------|--------------|---------------------------------|
| chr2  | 84686507  | 84687236  | 730  | * | 9  | 2.93644E-09 | 0.045926635 | 0.063379436 | 0.019441739 | -0.101040149 | -0.02737604  | SUCLG1                          |
| chr7  | 150755180 | 150755981 | 802  | * | 18 | 4.90527E-12 | 0.096903541 | 0.063394114 | 0.043150278 | 0.150267454  | 0.007317626  | SLC4A2, CDK5                    |
| chr5  | 50265407  | 50265924  | 518  | * | 7  | 4.37364E-09 | 0.012825577 | 0.063400356 | 0.013543657 | -0.055390342 | 0.012744548  | CTD-2089N3.3, CTD-2089N3.2      |
| chr20 | 33145456  | 33147017  | 1562 | * | 12 | 1.7213E-13  | 0.00120329  | 0.063445194 | 0.001765673 | 0.120487264  | 0.025709134  | MAP1LC3A                        |
| chr11 | 537287    | 537737    | 451  | * | 11 | 3.06939E-08 | 0.070353854 | 0.063509008 | 0.059884564 | 0.06022041   | 0.017979162  | LRRC56, HRAS                    |
| chr9  | 125795283 | 125795935 | 653  | * | 7  | 4.37617E-11 | 0.000274122 | 0.063566479 | 0.002041079 | -0.08813787  | -0.041679164 | RABGAP1                         |
| chr12 | 111180513 | 111180884 | 372  | * | 5  | 7.32472E-08 | 0.004134031 | 0.063580826 | 0.010495064 | 0.01602912   | 0.008844671  | PPP1CC                          |
| chr11 | 73881204  | 73882184  | 981  | * | 15 | 5.11197E-10 | 0.226971326 | 0.06386772  | 0.113850424 | -0.076445374 | -0.001428741 | PPME1, C2CD3                    |
| chr17 | 37761216  | 37761316  | 101  | * | 2  | 3.62954E-08 | 0.171690989 | 0.06389673  | 0.110016429 | 0.066201199  | 0.037046005  | NEUROD2                         |
| chr7  | 2884124   | 2884448   | 325  | * | 7  | 2.56433E-08 | 0.023052357 | 0.063924869 | 0.01893566  | -0.104060522 | -0.041960047 |                                 |
| chr15 | 79164980  | 79165973  | 994  | * | 11 | 2.16988E-08 | 0.543489372 | 0.063950715 | 0.104766488 | -0.055429049 | -0.005436335 | MORF4L1                         |
| chr16 | 27413786  | 27414281  | 496  | * | 5  | 4.06065E-08 | 0.002917317 | 0.063989445 | 0.008649167 | 0.102134494  | 0.042542172  | IL21R                           |
| chr6  | 30130819  | 30132715  | 1897 | * | 27 | 8.627E-16   | 0.002008947 | 0.064043866 | 0.001101331 | 0.162074656  | -0.004039121 | TRIM15                          |
| chr11 | 62439250  | 62439866  | 617  | * | 10 | 1.0707E-10  | 0.025641654 | 0.064211229 | 0.025385503 | 0.019977316  | -0.000304916 | C11orf83, C11orf48              |
| chr14 | 65005951  | 65007512  | 1562 | * | 30 | 3.93211E-19 | 0.005934199 | 0.064226916 | 0.000711754 | 0.166293814  | 0.00301828   | HSPA2, RP11-973N13.4            |
| chr16 | 88772210  | 88772686  | 477  | * | 6  | 2.70501E-08 | 0.002542355 | 0.064233068 | 0.008567519 | 0.037680184  | 0.018199891  | RNF166                          |
| chr14 | 23235667  | 23236155  | 489  | * | 10 | 8.48581E-09 | 0.150803584 | 0.064266948 | 0.076474673 | 0.021374968  | 0.001584427  | OXA1L, CTD-2555K7.2             |
| chr12 | 133000028 | 133000830 | 803  | * | 8  | 3.17621E-10 | 0.000158425 | 0.064554794 | 0.001424273 | -0.411666883 | 0.011192876  |                                 |
| chr18 | 48723744  | 48724109  | 366  | * | 4  | 1.01742E-07 | 0.041898731 | 0.06456533  | 0.059192887 | 0.012075037  | 0.009150218  | MEX3C                           |
| chr14 | 90420875  | 90422339  | 1465 | * | 14 | 1.00316E-12 | 0.017317272 | 0.064643997 | 0.012787448 | -0.052360112 | -0.00433202  | TDP1, RP11-33N16.3, EFCAB11     |
| chr10 | 7829471   | 7830258   | 788  | * | 14 | 5.71576E-12 | 0.017911037 | 0.064656278 | 0.012552689 | -0.032259438 | 0.005427096  | ATP5C1, KIN                     |
| chr4  | 78079025  | 78079628  | 604  | * | 7  | 4.26811E-08 | 0.006906485 | 0.064658481 | 0.015517345 | 0.026704608  | 0.006825817  | CCNG2                           |
| chr3  | 42694783  | 42695143  | 361  | * | 5  | 4.47888E-08 | 0.002175561 | 0.064703437 | 0.00811966  | -0.089290946 | -0.073386442 | RP4-613B23.1                    |
| chr19 | 40596516  | 40597063  | 548  | * | 10 | 4.24011E-09 | 0.005817512 | 0.064722827 | 0.014727541 | -0.029842403 | -0.002264278 | AC005614.3, AC005614.5, ZNF780A |
| chr10 | 45869189  | 45869816  | 628  | * | 10 | 5.44299E-09 | 0.164664044 | 0.064801184 | 0.042642453 | 0.05716234   | 0.005724073  | ALOX5                           |
| chr6  | 31583458  | 31584223  | 766  | * | 5  | 3.79224E-08 | 0.001851922 | 0.064869719 | 0.007225637 | -0.062091842 | -0.042066803 | AIF1                            |
| chr5  | 64919809  | 64920006  | 198  | * | 3  | 8.30137E-08 | 0.193362215 | 0.064904519 | 0.06768277  | 0.00780009   | 0.004910101  | TRIM23                          |
| chr4  | 40632362  | 40633095  | 734  | * | 9  | 1.3305E-09  | 0.041403452 | 0.064926402 | 0.029761955 | -0.10155021  | -0.039108221 | RBM47                           |
| chr5  | 134181226 | 134182149 | 924  | * | 14 | 2.85113E-13 | 0.005951832 | 0.064957069 | 0.003281151 | -0.040587666 | -0.009737198 | DDX46, C5orf24                  |

|       |           |           |      |   |    |             |             |             |             |              |              |                      |
|-------|-----------|-----------|------|---|----|-------------|-------------|-------------|-------------|--------------|--------------|----------------------|
| chr6  | 33245128  | 33246488  | 1361 | * | 41 | 2.53762E-15 | 0.126761566 | 0.064991491 | 0.08437723  | 0.134086355  | 0.020264618  | B3GALT4              |
| chr16 | 67571354  | 67571821  | 468  | * | 4  | 1.07428E-07 | 0.768620557 | 0.065088547 | 0.275669123 | 0.021817371  | 0.003225246  | FAM65A               |
| chr1  | 77684965  | 77685555  | 591  | * | 10 | 2.06842E-09 | 0.071244485 | 0.065099074 | 0.027544248 | 0.02157569   | 0.006889255  | PIGK                 |
| chr22 | 38901968  | 38902252  | 285  | * | 2  | 1.30369E-08 | 0.02892519  | 0.065321738 | 0.041912403 | -0.031228481 | -0.007795585 | DDX17                |
| chr12 | 48151524  | 48152931  | 1408 | * | 18 | 7.29459E-12 | 0.011335043 | 0.065554929 | 0.027061659 | -0.107850123 | -0.020681694 | SLC48A1, RAPGEF3     |
| chr15 | 65281804  | 65282678  | 875  | * | 9  | 5.89423E-10 | 0.004924277 | 0.065588774 | 0.006221076 | -0.046119272 | -0.010952172 | SPG21                |
| chr22 | 24890045  | 24891666  | 1622 | * | 19 | 1.82513E-13 | 0.007303637 | 0.065715394 | 0.004971451 | 0.16348722   | 0.044656642  | UPB1, ADORA2A-AS1    |
| chr14 | 23563715  | 23565052  | 1338 | * | 22 | 1.20343E-16 | 0.000687348 | 0.065725475 | 0.000731207 | -0.071201643 | -0.012689775 | C14orf119, ACIN1     |
| chr5  | 118603908 | 118604540 | 633  | * | 10 | 1.07846E-08 | 0.205301961 | 0.065745086 | 0.060035406 | -0.096446054 | -0.013804968 | TNFAIP8              |
| chr1  | 228296788 | 228297275 | 488  | * | 11 | 1.58588E-08 | 0.126165298 | 0.065877463 | 0.062002458 | -0.078874053 | -0.016011499 | MRPL55               |
| chr6  | 143266406 | 143266788 | 383  | * | 3  | 4.38348E-08 | 0.540520697 | 0.065890755 | 0.227717554 | 0.021683378  | 0.002452451  |                      |
| chr22 | 32341191  | 32341689  | 499  | * | 10 | 6.75411E-08 | 0.035444519 | 0.065961584 | 0.039383268 | 0.020850589  | -0.001218156 | YWHAH, C22orf24      |
| chr5  | 176037325 | 176037510 | 186  | * | 3  | 2.69024E-08 | 0.031913832 | 0.065969646 | 0.037517177 | 0.031007362  | 0.023069833  |                      |
| chr8  | 74659085  | 74659490  | 406  | * | 2  | 3.27576E-08 | 0.153020394 | 0.066031699 | 0.107428855 | -0.044055849 | -0.023633138 | STAU2, RP11-463D19.2 |
| chr17 | 42200988  | 42201211  | 224  | * | 8  | 7.87799E-08 | 0.176749326 | 0.066168063 | 0.033496007 | -0.086000838 | -0.030460587 | HDAC5                |
| chr2  | 70056602  | 70057052  | 451  | * | 7  | 2.68838E-08 | 0.021609501 | 0.066255824 | 0.041793654 | 0.026190839  | 0.003077097  | GMCL1                |
| chr20 | 62338600  | 62339243  | 644  | * | 13 | 6.59331E-09 | 0.295545591 | 0.066370749 | 0.109388808 | -0.038968186 | -0.002202464 | ZGPAT, ARFRP1        |
| chr12 | 65218019  | 65218869  | 851  | * | 14 | 1.8964E-10  | 0.074738177 | 0.066516516 | 0.047450827 | 0.049040463  | 0.010687331  | TBC1D30              |
| chr12 | 104679896 | 104680923 | 1028 | * | 8  | 8.93863E-10 | 0.00231463  | 0.066571122 | 0.00681603  | 0.138553556  | 1.71807E-06  | TXNRD1               |
| chr5  | 125936419 | 125936881 | 463  | * | 8  | 4.19288E-08 | 0.004848947 | 0.066578121 | 0.015542873 | 0.05743092   | 0.008856257  | PHAX                 |
| chr2  | 11485384  | 11485784  | 401  | * | 5  | 8.30473E-08 | 0.003256447 | 0.066623711 | 0.008543265 | -0.097656428 | -0.031961821 | ROCK2                |
| chr5  | 133862209 | 133862682 | 474  | * | 2  | 5.11287E-08 | 0.06183525  | 0.066759781 | 0.068857735 | 0.019688356  | 0.01447792   | JADE2                |
| chr11 | 108368743 | 108369406 | 664  | * | 6  | 2.08259E-08 | 0.049688095 | 0.066766019 | 0.069425658 | 0.029649743  | 0.004989229  | KDELC2               |
| chr12 | 57853396  | 57854236  | 841  | * | 8  | 2.16675E-09 | 0.007061204 | 0.066802852 | 0.007647224 | 0.02498058   | 0.00846126   | GLI1                 |
| chr6  | 111804044 | 111805608 | 1565 | * | 16 | 1.40395E-09 | 0.007489988 | 0.06703748  | 0.008238656 | -0.046614692 | -0.002465909 | TRAF3IP2-AS1, REV3L  |
| chr4  | 46391159  | 46392253  | 1095 | * | 13 | 6.43268E-12 | 0.108949318 | 0.067169896 | 0.022523874 | 0.064111782  | 0.015395475  | GABRA2               |
| chr1  | 110527112 | 110527798 | 687  | * | 10 | 7.10895E-09 | 0.33521876  | 0.067337459 | 0.12869089  | 0.018080405  | -0.00023989  | AHCYL1               |
| chr16 | 9185438   | 9186674   | 1237 | * | 11 | 1.70535E-12 | 0.013474551 | 0.067366221 | 0.003829592 | -0.041487239 | 0.005220731  | C16orf72             |
| chr18 | 71958904  | 71959407  | 504  | * | 10 | 3.95025E-09 | 0.026611156 | 0.06742314  | 0.024398938 | -0.070197106 | 0.002241843  | CYB5A                |

|       |           |           |      |   |    |             |             |             |             |              |              |                                       |
|-------|-----------|-----------|------|---|----|-------------|-------------|-------------|-------------|--------------|--------------|---------------------------------------|
| chr18 | 47807692  | 47808184  | 493  | * | 10 | 1.39605E-10 | 0.012406942 | 0.067453542 | 0.013006087 | -0.060109571 | -0.014158424 | MBD1                                  |
| chr1  | 115300440 | 115301208 | 769  | * | 12 | 1.57734E-10 | 0.014535432 | 0.067454741 | 0.013441419 | -0.040618557 | -0.018766845 | CSDE1                                 |
| chr2  | 30669385  | 30670170  | 786  | * | 11 | 8.72948E-10 | 0.004966041 | 0.067457424 | 0.014975129 | -0.17128932  | -0.043137452 | LCLAT1                                |
| chr6  | 70576740  | 70577606  | 867  | * | 9  | 1.17939E-09 | 0.007387111 | 0.067474971 | 0.014007185 | 0.054166841  | 0.010136437  | COL19A1                               |
| chr16 | 67260661  | 67261425  | 765  | * | 15 | 2.53525E-09 | 0.045328509 | 0.067510781 | 0.04436053  | -0.049201792 | -0.011979811 | TMEM208, LRRC29, AC040160.1           |
| chr3  | 63263752  | 63264335  | 584  | * | 9  | 7.14972E-08 | 0.053279774 | 0.067573685 | 0.031504993 | 0.179183181  | 0.045227383  | SYNPR                                 |
| chr6  | 123316988 | 123317212 | 225  | * | 7  | 1.58923E-07 | 0.122619648 | 0.06759946  | 0.124322485 | 0.084242457  | 0.007568433  | CLVS2                                 |
| chr11 | 62521055  | 62522365  | 1311 | * | 14 | 5.99035E-12 | 0.012190734 | 0.06783274  | 0.004729682 | 0.067395379  | -0.001863579 | ZBTB3                                 |
| chr1  | 120190378 | 120190989 | 612  | * | 7  | 3.83834E-09 | 0.018786776 | 0.067879345 | 0.017883904 | -0.078359086 | -0.01021993  | ZNF697                                |
| chr11 | 71823292  | 71823843  | 552  | * | 11 | 1.44061E-08 | 0.110415055 | 0.0679494   | 0.063020208 | -0.05385879  | -0.01376073  | ANAPC15                               |
| chr4  | 81187575  | 81187610  | 36   | * | 5  | 2.57393E-08 | 0.001154804 | 0.06798945  | 0.005332976 | -0.032663573 | 0.001964838  |                                       |
| chr11 | 61735136  | 61735531  | 396  | * | 8  | 5.33247E-08 | 0.011190198 | 0.067992393 | 0.019410686 | -0.015156708 | -0.000723123 | AP003733.1                            |
| chr7  | 27281216  | 27284348  | 3133 | * | 34 | 3.07918E-14 | 2.29414E-05 | 0.068130559 | 0.00032496  | 0.082610151  | 0.034468456  | EVX1, EVX1-AS                         |
| chr15 | 43477090  | 43478176  | 1087 | * | 16 | 2.18916E-10 | 0.071377101 | 0.06818942  | 0.02781402  | -0.114874219 | 0.001873069  | TMEM62, CCNDBP1, EPB42, RP11-473C18.3 |
| chr11 | 6704824   | 6704982   | 159  | * | 5  | 1.02518E-07 | 0.032331305 | 0.068253299 | 0.011873554 | 0.015317624  | 0.001547055  |                                       |
| chr6  | 34113887  | 34113943  | 57   | * | 7  | 1.30824E-07 | 0.010172918 | 0.068371475 | 0.02443114  | 0.090599593  | 0.060085771  | GRM4                                  |
| chr7  | 4901337   | 4902257   | 921  | * | 11 | 3.76223E-12 | 0.000405891 | 0.068387146 | 0.00262041  | 0.130092699  | 0.06130858   | RADIL, PAPOLB                         |
| chr1  | 205180527 | 205181581 | 1055 | * | 13 | 1.92317E-10 | 0.015626156 | 0.06839842  | 0.0223328   | -0.040352408 | -0.017458818 | DSTYK                                 |
| chr16 | 68014338  | 68014699  | 362  | * | 8  | 3.29457E-08 | 0.016390966 | 0.068419458 | 0.01423368  | 0.109257969  | 0.071405387  | DPEP3                                 |
| chr19 | 39389904  | 39390960  | 1057 | * | 20 | 5.66874E-14 | 0.120081326 | 0.06845289  | 0.025812188 | -0.105724807 | -0.006125991 | NFKBIB, SIRT2                         |
| chr22 | 44350860  | 44351685  | 826  | * | 12 | 3.21758E-09 | 0.079234898 | 0.068484333 | 0.036323945 | 0.029395435  | 0.007499702  | PNPLA3, SAMM50                        |
| chr3  | 49044175  | 49045655  | 1481 | * | 18 | 1.22825E-10 | 0.002681524 | 0.068584894 | 0.010201064 | 0.104388608  | -0.001223483 | P4HTM, WDR6                           |
| chr21 | 35013970  | 35015742  | 1773 | * | 19 | 2.11408E-09 | 0.035282873 | 0.068636109 | 0.020753995 | -0.06589835  | -0.010241349 | ITSN1, AP000304.12, CRYZL1            |
| chr16 | 3451006   | 3451666   | 661  | * | 10 | 2.5911E-08  | 0.084098324 | 0.068690809 | 0.052929275 | -0.038515517 | -0.002759974 | NAA60, ZNF174, ZSCAN32                |
| chr1  | 52456341  | 52456918  | 578  | * | 13 | 9.04546E-09 | 0.078313891 | 0.06878328  | 0.039508248 | 0.083102304  | 0.021725041  | RAB3B                                 |
| chr2  | 24345949  | 24346867  | 919  | * | 10 | 2.35232E-09 | 0.152824505 | 0.068989927 | 0.039145425 | 0.025395595  | -0.002618315 | FAM228B, PFN4                         |
| chr16 | 31044110  | 31045464  | 1355 | * | 20 | 7.76132E-10 | 0.29467339  | 0.06901874  | 0.066100801 | -0.057037914 | -0.004177087 | STX4                                  |
| chr6  | 42981424  | 42982050  | 627  | * | 14 | 2.55521E-11 | 0.010983203 | 0.069064498 | 0.00915607  | -0.059693664 | -0.01203615  | KLHDC3, MEA1                          |
| chr19 | 47778045  | 47778150  | 106  | * | 5  | 8.6379E-08  | 0.006188852 | 0.06906674  | 0.017008827 | -0.080737081 | -0.053046944 | PRR24                                 |

|       |           |           |      |   |    |             |             |             |             |              |              |                                 |
|-------|-----------|-----------|------|---|----|-------------|-------------|-------------|-------------|--------------|--------------|---------------------------------|
| chr11 | 45868398  | 45869488  | 1091 | * | 15 | 2.06193E-12 | 0.022181914 | 0.069084787 | 0.00605901  | 0.098520111  | 0.020272139  | CRY2                            |
| chr18 | 9913006   | 9914102   | 1097 | * | 13 | 1.21444E-12 | 0.005169058 | 0.069111378 | 0.007006212 | 0.027308536  | 0.00954694   | VAPA                            |
| chr3  | 111805225 | 111805408 | 184  | * | 6  | 1.90258E-07 | 0.305454557 | 0.069111768 | 0.116042002 | -0.054603035 | -0.013049856 | C3orf52                         |
| chr1  | 28240714  | 28241681  | 968  | * | 14 | 1.21211E-11 | 0.028692322 | 0.069123105 | 0.018800964 | -0.050159835 | 0.006488526  | RPA2                            |
| chr10 | 104503149 | 104503860 | 712  | * | 9  | 2.78945E-08 | 0.02053391  | 0.069142455 | 0.0191957   | -0.054195679 | -0.021507625 | SFXN2, WBP1L                    |
| chr1  | 67896128  | 67896741  | 614  | * | 5  | 5.32788E-09 | 0.025205283 | 0.069177246 | 0.039899718 | 0.01433864   | 0.004715079  |                                 |
| chr6  | 31164776  | 31165512  | 737  | * | 14 | 1.45267E-11 | 0.038616149 | 0.069274552 | 0.03694419  | 0.092643209  | 0.034234292  | XXbac-BPG299F13.17              |
| chr14 | 75348249  | 75348400  | 152  | * | 5  | 1.42888E-07 | 0.003107758 | 0.069290718 | 0.010255896 | -0.028548555 | 0.000124084  |                                 |
| chr19 | 1174154   | 1174419   | 266  | * | 7  | 9.4808E-08  | 0.018558394 | 0.069332536 | 0.024592475 | -0.07216772  | -0.023925992 | SBNO2                           |
| chr1  | 156046778 | 156047143 | 366  | * | 5  | 8.82057E-08 | 0.041443828 | 0.069363545 | 0.054946742 | 0.121406126  | 0.055201212  | MEX3A                           |
| chr19 | 3699951   | 3700773   | 823  | * | 8  | 6.84586E-08 | 0.013024009 | 0.069443813 | 0.01037524  | -0.031466328 | -0.006256977 | PIP5K1C                         |
| chr2  | 198317568 | 198318740 | 1173 | * | 19 | 1.06715E-16 | 0.000272906 | 0.069516865 | 0.000645669 | -0.080885453 | -0.016696774 | COQ10B                          |
| chr17 | 32483560  | 32484259  | 700  | * | 13 | 1.83075E-09 | 0.082193041 | 0.069528077 | 0.036202754 | 0.061356484  | 0.022930827  | ASIC2                           |
| chr11 | 64948214  | 64949502  | 1289 | * | 19 | 2.19952E-12 | 0.037309756 | 0.069536657 | 0.02945701  | -0.065584149 | 0.001502804  | CAPN1, AP003068.23              |
| chr12 | 132568535 | 132569020 | 486  | * | 10 | 2.04186E-10 | 0.002164298 | 0.069549064 | 0.006036563 | -0.065248443 | -0.002770918 | EP400NL                         |
| chr16 | 2009320   | 2009675   | 356  | * | 7  | 2.51204E-08 | 0.009956516 | 0.069578229 | 0.016801385 | 0.014601151  | 0.003179946  | NDUFB10                         |
| chr16 | 2040863   | 2042103   | 1241 | * | 11 | 1.71169E-09 | 0.006785121 | 0.069680602 | 0.011245964 | 0.07602016   | 0.030655931  | SYNGR3                          |
| chr5  | 133860141 | 133861078 | 938  | * | 5  | 1.14769E-09 | 0.021731416 | 0.069776709 | 0.033998166 | -0.036967524 | -0.009933595 | JADE2                           |
| chr6  | 10694545  | 10695351  | 807  | * | 15 | 7.53413E-11 | 0.153071718 | 0.069817355 | 0.02471799  | 0.030119459  | -0.005159423 | PAK1IP1, C6orf52                |
| chr4  | 37828046  | 37828219  | 174  | * | 6  | 8.95908E-08 | 0.002353584 | 0.069872304 | 0.00852976  | 0.019203679  | 0.002742673  |                                 |
| chr4  | 38665594  | 38666663  | 1070 | * | 12 | 1.21365E-11 | 0.0091803   | 0.069923145 | 0.005759578 | -0.097031723 | -0.029334914 | KLF3, RP11-617D20.1, AC021860.1 |
| chr21 | 47062953  | 47063665  | 713  | * | 8  | 7.38674E-11 | 0.000781176 | 0.070031641 | 0.00291618  | -0.058268106 | -0.018622822 | PCBP3                           |
| chr16 | 23567971  | 23569487  | 1517 | * | 23 | 9.84147E-13 | 0.075978304 | 0.0700771   | 0.01302766  | 0.117814978  | 0.004823439  | UBFD1, EARS2                    |
| chr22 | 28314999  | 28315683  | 685  | * | 10 | 3.50517E-09 | 0.023413618 | 0.070129035 | 0.013695496 | -0.032878638 | 0.002481303  | TTC28-AS1, PITPNB               |
| chr2  | 180725622 | 180726697 | 1076 | * | 14 | 3.7184E-09  | 0.020368449 | 0.07014344  | 0.014327761 | 0.034718027  | 0.010740396  | ZNF385B, MIR1258                |
| chr11 | 118271932 | 118272803 | 872  | * | 14 | 1.24164E-09 | 0.072761693 | 0.07018967  | 0.040197438 | -0.026731002 | -0.009232625 | ATP5L, RP11-770J1.5             |
| chr4  | 81104695  | 81105823  | 1129 | * | 8  | 6.08615E-09 | 0.005903861 | 0.0702614   | 0.0091666   | 0.062725165  | 0.016754074  | PRDM8, RP11-377G16.2            |
| chr16 | 777273    | 777724    | 452  | * | 4  | 4.30389E-08 | 0.014058914 | 0.070306971 | 0.031057516 | -0.052116747 | -0.025528207 | HAGHL                           |
| chr6  | 27835191  | 27835460  | 270  | * | 7  | 1.10988E-07 | 0.013351647 | 0.07040702  | 0.018705679 | -0.028777003 | 4.6836E-05   | HIST1H1B                        |

|       |           |           |      |   |    |             |             |             |             |              |              |                              |
|-------|-----------|-----------|------|---|----|-------------|-------------|-------------|-------------|--------------|--------------|------------------------------|
| chr17 | 72199366  | 72200159  | 794  | * | 13 | 2.43734E-11 | 0.003282019 | 0.070471954 | 0.006888707 | -0.050400554 | -0.014043314 | RPL38                        |
| chr2  | 28615209  | 28615925  | 717  | * | 10 | 1.03549E-08 | 0.073133098 | 0.070542059 | 0.034626024 | -0.037068776 | 0.000532516  | FOSL2, AC104695.3            |
| chr5  | 148205612 | 148206412 | 801  | * | 10 | 3.06689E-09 | 0.011008465 | 0.070807539 | 0.014278396 | -0.035051235 | -0.00037932  | ADRB2                        |
| chr14 | 101292306 | 101292680 | 375  | * | 5  | 6.37631E-08 | 0.012581525 | 0.070835292 | 0.027757564 | -0.123619296 | -0.091288144 | MEG3                         |
| chr1  | 9256341   | 9257421   | 1081 | * | 8  | 2.26606E-08 | 0.038900326 | 0.070860598 | 0.018900813 | -0.149853942 | -0.021789767 | RP3-510D11.1                 |
| chr19 | 39420815  | 39421614  | 800  | * | 15 | 5.21546E-09 | 0.423826647 | 0.0708641   | 0.204371213 | 0.016017507  | 0.000601606  | MRPS12, SARS2, CTC-360G5.8   |
| chr5  | 134734307 | 134735104 | 798  | * | 9  | 1.59349E-11 | 0.027251407 | 0.070969513 | 0.009985418 | -0.047456959 | -0.020730821 | CTC-203F4.2, H2AFY           |
| chr19 | 10828564  | 10829423  | 860  | * | 19 | 1.47502E-08 | 0.868993695 | 0.071022525 | 0.291718165 | 0.024279026  | 0.002528957  | DNM2, MIR638                 |
| chr2  | 131862633 | 131863063 | 431  | * | 6  | 7.00735E-08 | 0.034964531 | 0.071156286 | 0.031525693 | -0.087052087 | -0.034607761 | PLEKHB2                      |
| chr1  | 212003502 | 212004642 | 1141 | * | 15 | 5.96761E-11 | 0.058115918 | 0.071220101 | 0.032281652 | -0.037503663 | 0.000986476  | RP11-552D8.1, LPGAT1         |
| chr12 | 52462420  | 52463368  | 949  | * | 8  | 2.72289E-10 | 0.001275557 | 0.07130901  | 0.004774607 | 0.12657931   | 0.052333349  | C12orf44                     |
| chr16 | 2272577   | 2273300   | 724  | * | 5  | 2.21211E-08 | 0.030792586 | 0.071401792 | 0.043241074 | 0.085236568  | 0.027005466  |                              |
| chr19 | 39881393  | 39882194  | 802  | * | 12 | 7.86752E-10 | 0.005310375 | 0.071402922 | 0.017145076 | -0.065357551 | -0.012838107 | MED29, PAF1                  |
| chr2  | 201171120 | 201171404 | 285  | * | 7  | 3.36522E-08 | 0.069543164 | 0.071512966 | 0.037628829 | -0.074430727 | -0.037676775 | SPATS2L                      |
| chr6  | 45389535  | 45390293  | 759  | * | 14 | 2.20303E-08 | 0.026604584 | 0.071607338 | 0.05417563  | -0.075336524 | -0.023460652 | RUNX2, RP1-244F24.1          |
| chr19 | 42363855  | 42364034  | 180  | * | 5  | 3.92266E-08 | 0.005084798 | 0.071981966 | 0.014127259 | -0.084008068 | -0.03688144  | RPS19                        |
| chr6  | 97285024  | 97285954  | 931  | * | 10 | 6.42149E-11 | 0.001873707 | 0.072039131 | 0.00565224  | 0.057101652  | 0.01215609   | GPR63                        |
| chr9  | 36258437  | 36258971  | 535  | * | 10 | 9.24375E-09 | 0.020537641 | 0.072168517 | 0.033925829 | -0.044699555 | 0.004158794  | CLTA, GNE                    |
| chr19 | 40732305  | 40732902  | 598  | * | 11 | 3.32993E-09 | 0.158446078 | 0.072185961 | 0.025929854 | 0.105697083  | 0.027812835  | CNTD2                        |
| chr15 | 72667883  | 72669149  | 1267 | * | 18 | 7.66098E-14 | 0.002895519 | 0.072285641 | 0.00657551  | -0.055396793 | 0.004221161  | HEXA-AS1, RP11-106M3.2, HEXA |
| chr1  | 207627372 | 207627656 | 285  | * | 8  | 9.03192E-08 | 0.031760539 | 0.072292363 | 0.029613698 | 0.033395879  | 0.003822363  | CR2                          |
| chr8  | 120867626 | 120868354 | 729  | * | 9  | 8.00651E-12 | 0.005993872 | 0.072355354 | 0.00789672  | 0.014788533  | 0.006997357  | DSCC1                        |
| chr6  | 30654410  | 30659692  | 5283 | * | 69 | 2.24802E-15 | 0.3009122   | 0.072409153 | 0.022876216 | 0.172601446  | 0.014935345  | PPP1R18, NRM                 |
| chr16 | 57769092  | 57769885  | 794  | * | 10 | 1.40787E-08 | 0.059771972 | 0.072451989 | 0.031130846 | -0.056587679 | -0.001175792 | KATNB1                       |
| chr5  | 127420015 | 127420219 | 205  | * | 4  | 3.46301E-08 | 0.002698334 | 0.072510516 | 0.009611176 | -0.083250238 | -0.028106203 | SLC12A2                      |
| chr17 | 73780373  | 73781307  | 935  | * | 17 | 3.07587E-11 | 0.130564627 | 0.072580205 | 0.053167158 | 0.040340229  | -0.000196854 | UNK, H3F3B, MIR4738          |
| chr7  | 107530905 | 107532014 | 1110 | * | 14 | 1.87805E-11 | 0.00834433  | 0.072669393 | 0.004784632 | 0.103903096  | 0.001255555  | DLD                          |
| chr15 | 69222895  | 69223018  | 124  | * | 5  | 8.92406E-08 | 0.00843009  | 0.072708504 | 0.01458688  | -0.171830481 | -0.104102591 | SPESP1, RP11-809H16.2, NOX5  |
| chr14 | 76127164  | 76128003  | 840  | * | 14 | 4.17218E-10 | 0.103448536 | 0.072782593 | 0.023479091 | -0.044327066 | -0.006225386 | FLVCR2, TTLL5, C14orf1       |

|       |           |           |      |   |    |             |             |             |             |              |              |                                           |
|-------|-----------|-----------|------|---|----|-------------|-------------|-------------|-------------|--------------|--------------|-------------------------------------------|
| chr6  | 30624395  | 30624769  | 375  | * | 8  | 1.16698E-08 | 0.002908169 | 0.072850479 | 0.008037821 | -0.13122683  | -0.061737313 | DHX16                                     |
| chr2  | 60781524  | 60781678  | 155  | * | 4  | 1.67482E-07 | 0.012109543 | 0.072907719 | 0.027666771 | -0.051974792 | -0.01852587  |                                           |
| chr19 | 38746749  | 38747796  | 1048 | * | 13 | 1.19441E-09 | 0.123881727 | 0.072915222 | 0.06051255  | -0.053423316 | 0.006722419  | SPINT2, PPP1R14A                          |
| chr12 | 104359324 | 104359732 | 409  | * | 8  | 9.18322E-08 | 0.010544692 | 0.072951002 | 0.014886993 | -0.110792027 | -0.01870195  | TDG, C12orf73                             |
| chr1  | 155231766 | 155232677 | 912  | * | 15 | 5.15393E-10 | 0.19017156  | 0.072960571 | 0.050623768 | -0.106755442 | -0.01444533  | SCAMP3, CLK2                              |
| chr4  | 5021111   | 5021778   | 668  | * | 7  | 2.33708E-08 | 0.016590762 | 0.072997787 | 0.017143795 | 0.083780609  | 0.021111492  | CYTL1                                     |
| chr3  | 40428713  | 40429472  | 760  | * | 7  | 3.24368E-09 | 0.002946191 | 0.07314306  | 0.007513093 | -0.104458044 | -0.010374134 | ENTPD3, ENTPD3-AS1                        |
| chr15 | 93447445  | 93447586  | 142  | * | 5  | 1.05323E-07 | 0.027283479 | 0.073199949 | 0.024103848 | 0.015883068  | 0.009336397  | CHD2                                      |
| chr11 | 5617367   | 5618023   | 657  | * | 7  | 9.77147E-09 | 0.00096029  | 0.073252056 | 0.004370371 | -0.068705078 | -0.039509839 | TRIM6, TRIM6-TRIM34, HBG2,<br>AC015691.13 |
| chr22 | 39190118  | 39190571  | 454  | * | 9  | 1.6618E-08  | 0.006513891 | 0.073340582 | 0.013729365 | -0.041207246 | -0.015517737 | SUN2, DNAL4                               |
| chr3  | 45729807  | 45731405  | 1599 | * | 26 | 7.50013E-12 | 0.151334226 | 0.07335853  | 0.050110363 | -0.045265609 | -0.000758621 | SACM1L, LIMD1-AS1                         |
| chr10 | 11206221  | 11207015  | 795  | * | 9  | 3.7076E-08  | 0.026019472 | 0.073430057 | 0.03579344  | -0.044732173 | -0.006901966 | CELF2                                     |
| chr8  | 22462455  | 22463191  | 737  | * | 8  | 2.09341E-09 | 0.070628386 | 0.073563165 | 0.029316487 | 0.058750511  | -0.008418378 | CCAR2                                     |
| chr3  | 113160183 | 113161177 | 995  | * | 13 | 2.0154E-09  | 0.017266709 | 0.073588104 | 0.019315416 | -0.140018986 | -0.050662196 | WDR52                                     |
| chr14 | 37125914  | 37125997  | 84   | * | 2  | 1.54549E-07 | 0.02907492  | 0.073632589 | 0.043998889 | 0.030789424  | 0.024021846  | RP11-964E11.2                             |
| chr2  | 175198952 | 175200286 | 1335 | * | 13 | 4.14358E-10 | 0.055294903 | 0.07364705  | 0.019236811 | -0.057938387 | 0.014122129  | SP9                                       |
| chr10 | 81966990  | 81967666  | 677  | * | 8  | 6.79792E-10 | 0.001347148 | 0.073726912 | 0.004743826 | -0.166222421 | -0.090351401 | LINC00857                                 |
| chr7  | 94023308  | 94024254  | 947  | * | 11 | 5.12148E-09 | 0.023373563 | 0.073929128 | 0.026777347 | -0.071209857 | 0.026812175  | COL1A2                                    |
| chr10 | 72362292  | 72362866  | 575  | * | 9  | 3.64525E-09 | 0.003705279 | 0.074086463 | 0.01191699  | 0.089047852  | 0.055466846  | PRF1                                      |
| chr6  | 24720710  | 24720818  | 109  | * | 3  | 8.04199E-08 | 0.073312198 | 0.074114441 | 0.088518136 | 0.010728811  | 0.009503837  | C6orf62                                   |
| chr19 | 12776902  | 12777903  | 1002 | * | 20 | 3.78838E-13 | 0.009257941 | 0.074212068 | 0.013115044 | -0.059050142 | -0.001544076 | WDR83, MAN2B1, CTD-2192J16.24             |
| chr10 | 112678594 | 112679649 | 1056 | * | 19 | 3.0626E-11  | 0.041045458 | 0.074288724 | 0.031887868 | -0.072241968 | -0.009505643 | SHOC2, BBIP1                              |
| chr4  | 154709756 | 154710796 | 1041 | * | 17 | 1.15902E-12 | 0.013387973 | 0.074475251 | 0.014050802 | 0.05290088   | 0.003536665  | SFRP2                                     |
| chr3  | 101498065 | 101498416 | 352  | * | 7  | 2.55851E-08 | 0.109614149 | 0.07458319  | 0.052084461 | -0.039833617 | -0.004623193 | NXPE3                                     |
| chr6  | 90062465  | 90062885  | 421  | * | 9  | 6.69677E-08 | 0.016548471 | 0.07470388  | 0.031925918 | 0.024970138  | 0.001178644  | UBE2J1                                    |
| chr14 | 35451467  | 35452441  | 975  | * | 15 | 4.80547E-13 | 0.020170437 | 0.07476041  | 0.010754362 | -0.03484894  | 0.000154565  | SRP54, RP11-85K15.2                       |
| chr20 | 5485144   | 5485511   | 368  | * | 8  | 3.12744E-09 | 0.022977493 | 0.074783247 | 0.011187242 | -0.119919349 | -0.07285199  | LINC00654                                 |
| chr7  | 25019751  | 25020404  | 654  | * | 7  | 9.15492E-09 | 0.003074746 | 0.074811077 | 0.011142201 | -0.041006114 | -0.015748904 | OSBPL3                                    |
| chr11 | 110583549 | 110584091 | 543  | * | 10 | 5.22173E-08 | 0.106053342 | 0.074856672 | 0.059258865 | -0.183874673 | -0.012735858 | ARHGAP20                                  |

|       |           |           |      |   |    |             |             |             |             |              |              |                            |
|-------|-----------|-----------|------|---|----|-------------|-------------|-------------|-------------|--------------|--------------|----------------------------|
| chr17 | 35305470  | 35306345  | 876  | * | 11 | 2.8292E-11  | 0.003161231 | 0.074858866 | 0.006302137 | 0.023854939  | 0.007714171  | AATF                       |
| chr3  | 57261306  | 57261829  | 524  | * | 8  | 2.48345E-10 | 0.002660408 | 0.074942512 | 0.004004035 | -0.033292769 | -0.009179936 | APPL1                      |
| chr11 | 66034681  | 66036614  | 1934 | * | 56 | 1.74727E-16 | 0.517421334 | 0.074993914 | 0.188592392 | 0.079599642  | -0.005076155 | KLC2, RAB1B, RP11-867G23.2 |
| chr5  | 108084635 | 108084930 | 296  | * | 4  | 1.1512E-07  | 0.036565831 | 0.075109863 | 0.058843199 | -0.04181994  | -0.021299077 | FER                        |
| chr2  | 38977957  | 38978678  | 722  | * | 6  | 9.77532E-09 | 0.011843855 | 0.075190551 | 0.024310646 | -0.043145458 | -0.004199408 | GEMIN6, SRSF7              |
| chr2  | 33824170  | 33824684  | 515  | * | 11 | 4.90024E-08 | 0.309405267 | 0.075453132 | 0.149998509 | -0.020638033 | -0.004484578 | FAM98A                     |
| chr11 | 93517122  | 93517837  | 716  | * | 13 | 1.90748E-10 | 0.038703638 | 0.075722549 | 0.02790991  | -0.097377104 | -0.020135564 | MED17, TAF1D               |
| chr20 | 45035173  | 45036183  | 1011 | * | 13 | 1.5663E-10  | 0.004164883 | 0.07573169  | 0.010178157 | 0.155997693  | -0.002418224 | ELMO2                      |
| chr5  | 149736866 | 149737143 | 278  | * | 4  | 1.40695E-07 | 0.383891839 | 0.075903269 | 0.097842226 | -0.075514965 | -0.034381199 |                            |
| chr6  | 41513733  | 41514112  | 380  | * | 7  | 5.03156E-08 | 0.004069249 | 0.075937113 | 0.010122252 | -0.031621797 | -0.006414641 | RP11-328M4.2               |
| chr2  | 74730047  | 74730166  | 120  | * | 3  | 7.09041E-08 | 0.19871402  | 0.076113235 | 0.065523969 | -0.103002314 | -0.020354561 | LBX2-AS1, LBX2             |
| chr1  | 33115769  | 33116824  | 1056 | * | 17 | 1.86023E-12 | 0.043226465 | 0.076151953 | 0.024855976 | -0.104080808 | -0.011206322 | RBBP4, ZBTB8OS             |
| chr16 | 75681490  | 75682551  | 1062 | * | 13 | 1.93195E-10 | 0.009395959 | 0.076362467 | 0.019037119 | -0.029945898 | 0.002590083  | TERF2IP, KARS              |
| chr11 | 16759744  | 16760677  | 934  | * | 15 | 6.82775E-09 | 0.036490405 | 0.076620037 | 0.043866174 | -0.070765368 | -0.009783637 | C11orf58, SOX6             |
| chr6  | 166795816 | 166797429 | 1614 | * | 32 | 6.24114E-17 | 0.048653137 | 0.076658222 | 0.029376239 | -0.175390651 | -0.007128739 | RP1-168L15.5, MPC1         |
| chr14 | 60976115  | 60976285  | 171  | * | 2  | 5.02818E-08 | 0.02308663  | 0.076660924 | 0.037738981 | 0.040474086  | 0.025521072  | SIX6, C14orf39             |
| chr12 | 51419900  | 51420538  | 639  | * | 12 | 1.25008E-08 | 0.038689821 | 0.076664069 | 0.039783341 | -0.029115175 | 0.000566026  | SLC11A2                    |
| chr1  | 224803364 | 224804226 | 863  | * | 9  | 1.35245E-10 | 0.000398285 | 0.076681406 | 0.001939712 | 0.059634592  | 0.017253959  | CNIH3, RP11-100E13.1       |
| chr1  | 235291861 | 235293080 | 1220 | * | 12 | 5.0243E-10  | 0.023079128 | 0.076808652 | 0.016405321 | 0.105500279  | 0.003494101  | TOMM20                     |
| chr11 | 61594965  | 61595983  | 1019 | * | 14 | 1.81272E-12 | 0.021580904 | 0.077007127 | 0.015440613 | -0.09141846  | -0.010885332 | FADS2, FADS1               |
| chr7  | 111201994 | 111202900 | 907  | * | 13 | 6.75808E-09 | 0.093491043 | 0.077132753 | 0.027668975 | -0.051638186 | -0.008785644 | IMMP2L                     |
| chr5  | 95297236  | 95298307  | 1072 | * | 12 | 2.16709E-10 | 0.024771113 | 0.077147282 | 0.023345655 | -0.052116984 | -0.011768386 | CTD-2337A12.1, ELL2        |
| chr6  | 32014148  | 32015773  | 1626 | * | 23 | 1.93674E-11 | 0.157827107 | 0.077182566 | 0.037988481 | 0.125672595  | 0.036380421  | TNXB                       |
| chr12 | 49182837  | 49182908  | 72   | * | 4  | 2.05993E-07 | 0.139838962 | 0.077257687 | 0.08083898  | -0.076860646 | -0.031360169 |                            |
| chr5  | 131347650 | 131347999 | 350  | * | 9  | 1.40755E-07 | 0.11109881  | 0.077283372 | 0.068515977 | 0.101392637  | 0.028132212  | AC034228.2, ACSL6          |
| chr4  | 185747061 | 185748017 | 957  | * | 12 | 1.30617E-09 | 0.029414761 | 0.077473986 | 0.040949552 | 0.028360894  | 0.005624553  | ACSL1                      |
| chr2  | 172544044 | 172544336 | 293  | * | 7  | 1.2951E-07  | 0.056546868 | 0.077552137 | 0.067399958 | -0.049440604 | -0.013924923 | DYNC112                    |
| chr8  | 146017580 | 146018604 | 1025 | * | 12 | 6.48629E-12 | 0.009698549 | 0.07756735  | 0.006314323 | -0.041957534 | -0.010473866 | RPL8                       |
| chr16 | 18812258  | 18813117  | 860  | * | 10 | 5.11111E-10 | 0.036399839 | 0.077622936 | 0.0088525   | -0.100264042 | -0.021541913 | RP11-1035H13.3, ARL6IP1    |

|       |           |           |      |   |    |             |             |             |             |              |              |                        |
|-------|-----------|-----------|------|---|----|-------------|-------------|-------------|-------------|--------------|--------------|------------------------|
| chr1  | 33816020  | 33816758  | 739  | * | 6  | 1.96236E-08 | 0.032794989 | 0.07768026  | 0.025782937 | -0.140418122 | -0.019670679 | RP11-415J8.5, PHC2     |
| chr6  | 30853569  | 30854551  | 983  | * | 10 | 1.53053E-08 | 0.058533476 | 0.077681981 | 0.052857729 | 0.118890151  | 0.056804745  | DDR1                   |
| chr11 | 65546988  | 65547886  | 899  | * | 7  | 1.02926E-09 | 0.001554614 | 0.077706506 | 0.008168328 | -0.148898593 | -0.065870239 | AP5B1, AP001266.1      |
| chr14 | 24583182  | 24584561  | 1380 | * | 20 | 1.68954E-12 | 0.001846554 | 0.077879741 | 0.004493397 | -0.048584265 | -0.010745965 | DCAF11, NRL            |
| chr3  | 32859377  | 32859587  | 211  | * | 6  | 1.3563E-07  | 0.109644561 | 0.077899294 | 0.032788949 | 0.018668666  | 0.00563325   | TRIM71                 |
| chr3  | 9438726   | 9440081   | 1356 | * | 14 | 8.40431E-12 | 0.001051652 | 0.077900098 | 0.002591815 | -0.061603117 | -0.02158734  | SETD5, SETD5-AS1       |
| chr14 | 69262818  | 69263504  | 687  | * | 9  | 1.13885E-09 | 0.004663432 | 0.077927707 | 0.009723809 | 0.083012723  | 0.018559725  | ZFP36L1                |
| chr17 | 62502038  | 62503014  | 977  | * | 12 | 6.34006E-12 | 0.016775464 | 0.077942623 | 0.012891955 | -0.045979477 | -0.007866603 | CEP95, DDX5            |
| chr3  | 52489323  | 52489874  | 552  | * | 9  | 7.8531E-08  | 0.007130873 | 0.077943725 | 0.020035886 | 0.038622277  | -0.001011732 | NISCH                  |
| chr1  | 44883990  | 44884264  | 275  | * | 7  | 2.66082E-09 | 0.001876017 | 0.078024803 | 0.005294805 | -0.139602006 | -0.042137095 | RNF220                 |
| chr3  | 108307933 | 108308545 | 613  | * | 17 | 1.31451E-08 | 0.373555891 | 0.078222699 | 0.153547081 | -0.254702792 | -0.021212715 | DZIP3, KIAA1524        |
| chr16 | 68344213  | 68344683  | 471  | * | 5  | 4.30938E-08 | 0.002624958 | 0.078240475 | 0.010433401 | 0.03107766   | 0.007221902  | SLC7A6OS               |
| chr15 | 81292926  | 81293687  | 762  | * | 9  | 6.03498E-11 | 0.003230226 | 0.078384858 | 0.007835329 | -0.027983686 | 0.000148659  | MESDC1                 |
| chr6  | 111136363 | 111136979 | 617  | * | 11 | 3.24195E-11 | 0.021364951 | 0.078386813 | 0.018009679 | -0.04731474  | -0.007931608 | CDK19                  |
| chr14 | 55368924  | 55370231  | 1308 | * | 11 | 7.72868E-10 | 0.160475244 | 0.078392081 | 0.048957882 | 0.029601412  | 0.003431053  | GCH1                   |
| chr4  | 37687247  | 37688741  | 1495 | * | 11 | 2.02573E-09 | 0.002374818 | 0.078392353 | 0.004648657 | -0.055315632 | -0.018883044 | RELL1                  |
| chr1  | 182808025 | 182808991 | 967  | * | 14 | 1.91625E-11 | 0.014344806 | 0.07843053  | 0.006363454 | 0.057387189  | 0.009911041  | DHX9                   |
| chr11 | 2919689   | 2920564   | 876  | * | 13 | 6.54501E-09 | 0.050144912 | 0.078579261 | 0.054583513 | 0.096595785  | -0.013728984 | SLC22A18AS             |
| chr12 | 25403680  | 25405317  | 1638 | * | 26 | 2.25997E-13 | 0.027591271 | 0.078599346 | 0.007731033 | 0.076862426  | -0.009381159 | KRAS                   |
| chr16 | 4289807   | 4289924   | 118  | * | 3  | 1.64217E-07 | 0.058245965 | 0.078604681 | 0.053925877 | 0.086295478  | 0.060817236  | SRL                    |
| chr7  | 140396886 | 140397380 | 495  | * | 10 | 1.73284E-08 | 0.004813796 | 0.078607947 | 0.02308639  | -0.052307706 | -0.015774986 | NDUFB2                 |
| chr19 | 51870364  | 51871466  | 1103 | * | 7  | 1.29617E-08 | 0.001748643 | 0.07871705  | 0.006118073 | -0.063542483 | -0.027477633 | CTD-2616J11.11, CLDND2 |
| chr11 | 129244505 | 129244523 | 19   | * | 2  | 1.74589E-07 | 0.029076131 | 0.078745519 | 0.045084507 | 0.022683816  | 0.01704655   |                        |
| chr12 | 132851518 | 132851967 | 450  | * | 5  | 4.18762E-08 | 0.001813519 | 0.078806819 | 0.008006757 | 0.094484987  | 0.082861029  | GALNT9                 |
| chr7  | 86848751  | 86849303  | 553  | * | 10 | 2.41885E-08 | 0.048095722 | 0.079163878 | 0.041084246 | -0.097219351 | -0.020261192 | TMEM243                |
| chr11 | 117049400 | 117050102 | 703  | * | 11 | 9.78211E-09 | 0.032689798 | 0.079877177 | 0.027850064 | 0.035283415  | 0.006999009  | SIDT2                  |
| chr22 | 38054183  | 38054892  | 710  | * | 9  | 1.12473E-08 | 0.013737839 | 0.079913121 | 0.012521779 | -0.059038372 | -0.011985688 | SH3BP1, PDXP, Z83844.1 |
| chr7  | 86974351  | 86974744  | 394  | * | 2  | 1.40369E-08 | 0.113238703 | 0.079956984 | 0.105014788 | 0.012091728  | 0.009393794  | TP53TG1                |
| chr14 | 73392648  | 73393301  | 654  | * | 13 | 5.1032E-09  | 0.159691552 | 0.080042149 | 0.066721532 | 0.094403329  | 0.005862938  | DCAF4                  |



|       |           |           |      |   |    |             |             |             |             |              |              |                                      |
|-------|-----------|-----------|------|---|----|-------------|-------------|-------------|-------------|--------------|--------------|--------------------------------------|
| chr1  | 94374370  | 94374966  | 597  | * | 5  | 1.73965E-08 | 0.030978721 | 0.080086245 | 0.036988174 | 0.024715086  | 0.0133694    | GCLM                                 |
| chr2  | 220110385 | 220110639 | 255  | * | 5  | 8.84866E-08 | 0.147305303 | 0.080198554 | 0.097807853 | 0.071946179  | 0.016585999  | STK16                                |
| chr17 | 48171720  | 48172668  | 949  | * | 18 | 1.01488E-13 | 0.078398623 | 0.080202374 | 0.042107846 | 0.035138057  | -0.004339858 | PKD2                                 |
| chr1  | 31190863  | 31191746  | 884  | * | 9  | 3.11858E-10 | 0.049204199 | 0.080321026 | 0.014017202 | -0.091392814 | -0.030410652 | MATN1-AS1, MATN1                     |
| chr5  | 39424930  | 39425549  | 620  | * | 11 | 2.70265E-08 | 0.015268392 | 0.080347825 | 0.027907913 | -0.050581047 | -0.025029581 | C9, DAB2                             |
| chr5  | 151150029 | 151152154 | 2126 | * | 21 | 1.02178E-13 | 0.014988649 | 0.080725077 | 0.002744292 | 0.097100556  | 0.00076499   | G3BP1, ATOX1                         |
| chr11 | 57479604  | 57480041  | 438  | * | 14 | 5.6413E-10  | 0.037846837 | 0.080772381 | 0.0337646   | -0.046332245 | -0.014125209 | MED19                                |
| chr17 | 2303788   | 2305255   | 1468 | * | 13 | 3.27236E-09 | 0.015740931 | 0.080779723 | 0.023203446 | -0.073185195 | -0.002836537 | MNT                                  |
| chr1  | 15943511  | 15944060  | 550  | * | 7  | 2.99628E-08 | 0.030528583 | 0.081036113 | 0.045094193 | -0.043641501 | -0.010494531 | DDI2                                 |
| chr19 | 40030677  | 40031046  | 370  | * | 9  | 1.10359E-08 | 0.007494456 | 0.081075913 | 0.028827695 | -0.036385102 | -0.004520085 | EID2                                 |
| chr4  | 89079587  | 89080686  | 1100 | * | 12 | 1.40923E-09 | 0.002996983 | 0.081085539 | 0.012852872 | -0.023152014 | 0.002931049  | ABCG2                                |
| chr6  | 139349120 | 139349771 | 652  | * | 10 | 3.797E-09   | 0.010534672 | 0.081112761 | 0.018301365 | -0.060841944 | -0.014432812 |                                      |
| chr10 | 70660528  | 70661472  | 945  | * | 12 | 2.17773E-09 | 0.002860596 | 0.081327745 | 0.017020416 | -0.044881191 | -0.012520882 | DDX50                                |
| chr5  | 154238120 | 154238496 | 377  | * | 6  | 2.28102E-09 | 0.031155004 | 0.081355028 | 0.055077759 | -0.035883929 | -0.025107154 | CNOT8, FAXDC2                        |
| chr1  | 235490951 | 235492429 | 1479 | * | 19 | 4.37514E-12 | 0.02706925  | 0.08142486  | 0.032165552 | -0.113851004 | -0.022851958 | GGPS1, ARID4B                        |
| chr4  | 89205337  | 89206201  | 865  | * | 14 | 3.12626E-08 | 0.076889887 | 0.081483474 | 0.072002755 | -0.044766233 | -0.012585905 | RP11-10L7.1, PPM1K                   |
| chr10 | 81205166  | 81205554  | 389  | * | 5  | 1.80879E-07 | 0.0024244   | 0.081652976 | 0.010260136 | -0.056835441 | -0.016597769 | ZCCHC24                              |
| chr2  | 677101    | 677585    | 485  | * | 7  | 3.14697E-08 | 0.16044272  | 0.081748587 | 0.059180997 | -0.042904842 | -0.015117166 | AC092159.2, TMEM18                   |
| chr10 | 101491598 | 101492713 | 1116 | * | 19 | 3.221E-12   | 0.176106983 | 0.081864156 | 0.036065994 | -0.05499396  | 4.47264E-05  | CUTC, COX15                          |
| chr4  | 44450358  | 44451077  | 720  | * | 9  | 1.336E-09   | 0.004741451 | 0.081954091 | 0.01021921  | -0.037309359 | 0.005048855  | KCTD8                                |
| chr5  | 139780509 | 139782041 | 1533 | * | 17 | 1.73277E-10 | 0.094771193 | 0.082045856 | 0.035599267 | -0.036099577 | 0.003746232  | ANKHD1, ANKHD1-EIF4EBP3, CTC-329D1.2 |
| chr11 | 2019079   | 2020560   | 1482 | * | 35 | 5.08315E-21 | 0.059172337 | 0.082230826 | 0.01354483  | -0.134408174 | -0.046524286 | H19                                  |
| chr1  | 50893067  | 50893469  | 403  | * | 4  | 9.94225E-09 | 0.004257422 | 0.082310447 | 0.014257204 | 0.070392124  | 0.042684799  |                                      |
| chr9  | 95857577  | 95859189  | 1613 | * | 17 | 2.67575E-10 | 0.003803078 | 0.082314445 | 0.007520729 | -0.097668123 | -0.025464861 | C9orf89, RP11-274J16.5               |
| chr16 | 1832094   | 1832551   | 458  | * | 3  | 7.08831E-08 | 0.295600977 | 0.082337426 | 0.107906654 | -0.017406463 | -0.00874012  | SPSB3                                |
| chr1  | 91486951  | 91487865  | 915  | * | 10 | 9.99957E-10 | 0.003736105 | 0.082345287 | 0.010613268 | -0.04545727  | -0.013793776 | ZNF644                               |
| chr3  | 129693370 | 129693791 | 422  | * | 6  | 4.05847E-08 | 0.052373784 | 0.082345925 | 0.086256709 | 0.064544091  | 0.030233258  | TRH                                  |
| chr15 | 37393009  | 37394166  | 1158 | * | 12 | 1.05108E-11 | 0.005825392 | 0.082420195 | 0.012430194 | 0.048357331  | 0.012828663  | MEIS2                                |
| chr3  | 69788137  | 69788878  | 742  | * | 10 | 1.5597E-10  | 0.000924547 | 0.082712078 | 0.004263882 | -0.088181594 | -0.032524737 | MITF                                 |

|       |           |           |      |   |    |             |             |             |             |              |              |                         |
|-------|-----------|-----------|------|---|----|-------------|-------------|-------------|-------------|--------------|--------------|-------------------------|
| chr4  | 78978133  | 78979207  | 1075 | * | 12 | 1.97853E-08 | 0.087262653 | 0.082786232 | 0.046504936 | 0.040443731  | 0.013277032  | FRAS1                   |
| chr3  | 156272685 | 156273486 | 802  | * | 15 | 1.33289E-10 | 0.023857599 | 0.082902153 | 0.026377128 | 0.165516198  | 0.029745096  | SSR3                    |
| chr8  | 74207183  | 74207199  | 17   | * | 3  | 9.48875E-08 | 0.015902284 | 0.082942598 | 0.033293726 | 0.024838872  | 0.004937674  | RDH10, RPL7             |
| chr19 | 7553700   | 7554359   | 660  | * | 12 | 4.22012E-10 | 0.022488948 | 0.08296011  | 0.018228504 | 0.091894966  | 0.015194397  | PEX11G                  |
| chr16 | 46722642  | 46724037  | 1396 | * | 15 | 1.1148E-13  | 0.001329131 | 0.082984003 | 0.002617575 | 0.024098878  | 0.003944684  | ORC6, VPS35             |
| chr1  | 34642386  | 34643124  | 739  | * | 12 | 2.02487E-09 | 0.022027653 | 0.083211192 | 0.016832862 | 0.118581228  | 0.038849     | C1orf94                 |
| chr6  | 29716186  | 29717656  | 1471 | * | 24 | 2.23451E-11 | 0.067886891 | 0.083274026 | 0.049578735 | -0.064795527 | -0.001215724 | HCG9P5, HLA-F-AS1, MICE |
| chr22 | 43505892  | 43507369  | 1478 | * | 28 | 8.46261E-15 | 0.180370862 | 0.083317259 | 0.073498498 | 0.059219103  | 0.00099326   | BIK                     |
| chr15 | 75871478  | 75872043  | 566  | * | 11 | 3.12199E-08 | 0.015757863 | 0.083434511 | 0.039225738 | -0.041869845 | -0.007825022 | PTPN9, CTD-2323K18.1    |
| chr2  | 45878852  | 45878977  | 126  | * | 4  | 1.82346E-07 | 0.013409426 | 0.083465006 | 0.024378943 | 0.008954659  | 0.001179065  | PRKCE                   |
| chr17 | 44928851  | 44929215  | 365  | * | 6  | 3.69841E-08 | 0.019003959 | 0.0835427   | 0.034310714 | 0.012543509  | 0.002807921  | WNT9B                   |
| chr1  | 67390349  | 67391144  | 796  | * | 15 | 2.10286E-12 | 0.007171989 | 0.083578569 | 0.009189612 | -0.109236792 | -0.003341447 | MIER1, WDR78            |
| chr6  | 127664193 | 127664850 | 658  | * | 9  | 8.3216E-09  | 0.021418911 | 0.083640581 | 0.018612733 | 0.035983224  | 0.012126181  | ECHDC1                  |
| chr4  | 4291695   | 4292567   | 873  | * | 16 | 3.06386E-10 | 0.056422849 | 0.083650882 | 0.046189812 | -0.040893227 | -0.00564089  | ZBTB49, LYAR            |
| chr1  | 224517614 | 224518531 | 918  | * | 17 | 1.09664E-09 | 0.120683234 | 0.083660355 | 0.062636201 | -0.064163695 | -0.010335396 | NVL                     |
| chr10 | 94050649  | 94051938  | 1290 | * | 17 | 2.32757E-09 | 0.048740037 | 0.083833958 | 0.025713051 | -0.065740661 | -0.002832817 | MARCH5, CPEB3           |
| chr19 | 54618544  | 54619166  | 623  | * | 14 | 9.45771E-10 | 0.113739635 | 0.083966648 | 0.048583908 | -0.058162722 | -0.008829111 | PRPF31, TFPT            |
| chr17 | 34890851  | 34891014  | 164  | * | 4  | 9.02016E-08 | 0.079839754 | 0.08416729  | 0.07143235  | 0.023418041  | -0.002852175 | PIGW, MYO19             |
| chr6  | 27356414  | 27357040  | 627  | * | 8  | 6.8974E-09  | 0.001234595 | 0.084265212 | 0.0071236   | -0.041653526 | 0.004985001  | ZNF391                  |
| chr11 | 68815449  | 68816453  | 1005 | * | 13 | 2.30367E-12 | 0.000867349 | 0.084325575 | 0.002229107 | 0.118086916  | -0.006002042 | TPCN2                   |
| chr6  | 139694674 | 139695867 | 1194 | * | 18 | 2.06581E-14 | 0.007771516 | 0.08441733  | 0.015807736 | -0.054214846 | -0.003501651 | CITED2                  |
| chr22 | 42016856  | 42018038  | 1183 | * | 23 | 6.75425E-11 | 0.388437036 | 0.084604148 | 0.156139139 | -0.056308695 | -0.010107343 | XRCC6, DESI1            |
| chr3  | 167452449 | 167453518 | 1070 | * | 16 | 1.05294E-12 | 0.015314038 | 0.084715244 | 0.008091264 | -0.059585837 | -0.007734047 | SERPINI1, PDCD10        |
| chr2  | 176964456 | 176964720 | 265  | * | 6  | 6.02901E-08 | 0.010708599 | 0.084725162 | 0.024003051 | 0.067068794  | 0.052531687  | HOXD12                  |
| chr12 | 53613892  | 53614500  | 609  | * | 13 | 1.54043E-10 | 0.010651712 | 0.084758429 | 0.01351044  | -0.038997487 | -0.004338571 | RARG                    |
| chr19 | 38865020  | 38865513  | 494  | * | 12 | 4.57422E-08 | 0.035745566 | 0.084774872 | 0.049489026 | -0.043721551 | -0.003016883 | PSMD8                   |
| chr12 | 31881969  | 31882626  | 658  | * | 11 | 1.61339E-08 | 0.049291069 | 0.084913777 | 0.034230412 | -0.095319281 | -0.022449919 | AMN1                    |
| chr17 | 65241476  | 65242096  | 621  | * | 5  | 1.03683E-08 | 0.049607904 | 0.085203293 | 0.074190087 | 0.023934757  | -0.000526258 | RP11-401F2.3, HELZ      |
| chr6  | 29720315  | 29721015  | 701  | * | 20 | 5.15559E-09 | 0.200711557 | 0.085259905 | 0.12696872  | -0.054572308 | -0.004575042 |                         |

|       |           |           |      |   |    |             |             |             |             |              |              |                             |
|-------|-----------|-----------|------|---|----|-------------|-------------|-------------|-------------|--------------|--------------|-----------------------------|
| chr19 | 54959757  | 54960304  | 548  | * | 10 | 1.27377E-08 | 0.013941438 | 0.085279067 | 0.026245397 | -0.039217571 | -0.004527074 | LENG8, LENG8-AS1            |
| chr19 | 39402823  | 39403047  | 225  | * | 6  | 1.74598E-07 | 0.00928367  | 0.085427611 | 0.017239518 | 0.152064697  | 0.079830791  |                             |
| chr21 | 34914246  | 34915592  | 1347 | * | 23 | 2.0426E-13  | 0.014706631 | 0.0854521   | 0.013416417 | -0.0484993   | -7.95327E-05 | SON, GART                   |
| chr17 | 46620895  | 46621638  | 744  | * | 8  | 1.96274E-09 | 0.014733207 | 0.085453634 | 0.01311688  | -0.053167362 | 0.004577741  | HOXB-AS1, HOXB2             |
| chr6  | 15245667  | 15246159  | 493  | * | 10 | 1.63823E-08 | 0.006112339 | 0.085527373 | 0.022953269 | -0.02498415  | -0.005059273 |                             |
| chr11 | 33795595  | 33796289  | 695  | * | 12 | 3.3476E-09  | 0.010469249 | 0.085551242 | 0.018517984 | -0.129593929 | -0.019626851 | RP11-646J21.5, FBXO3        |
| chr19 | 11289087  | 11289376  | 290  | * | 8  | 1.31648E-08 | 0.008148544 | 0.085577038 | 0.012009905 | 0.165094997  | 0.054140381  | KANK2                       |
| chr2  | 70314274  | 70315091  | 818  | * | 9  | 7.72958E-09 | 0.020896905 | 0.085806178 | 0.023596586 | -0.099410037 | -0.015543524 | PCBP1, PCBP1-AS1            |
| chr13 | 37453429  | 37454023  | 595  | * | 8  | 2.96686E-08 | 0.03383718  | 0.085932868 | 0.035037977 | 0.116768197  | 0.042092494  | SMAD9                       |
| chr15 | 79103718  | 79104136  | 419  | * | 6  | 2.96165E-08 | 0.011714119 | 0.086046823 | 0.020949557 | 0.052240678  | 0.018994022  | MORF4L1, ADAMTS7            |
| chr13 | 50017825  | 50019081  | 1257 | * | 18 | 3.03895E-08 | 0.04383701  | 0.086174379 | 0.052147268 | -0.066276683 | -0.008677334 | SETDB2, CAB39L, AL136218.1  |
| chr11 | 6625141   | 6625673   | 533  | * | 6  | 7.05864E-08 | 0.007490537 | 0.086176131 | 0.020441933 | -0.039676219 | -0.015701414 | ILK, RP11-732A19.8          |
| chr3  | 197475824 | 197477097 | 1274 | * | 18 | 2.31871E-12 | 0.019696844 | 0.086246021 | 0.020030763 | -0.035744711 | -0.006060777 | FYTTD1, KIAA0226            |
| chr16 | 89557182  | 89557420  | 239  | * | 6  | 1.07908E-07 | 0.013163204 | 0.086386648 | 0.03283452  | -0.032048348 | -0.01363798  | SPG7                        |
| chr2  | 163174891 | 163175335 | 445  | * | 8  | 1.04444E-07 | 0.013103949 | 0.086387103 | 0.029838143 | -0.073919278 | -0.005879856 | IFIH1                       |
| chr12 | 89745673  | 89746328  | 656  | * | 5  | 1.23634E-08 | 0.065683494 | 0.086403209 | 0.108350184 | -0.033965732 | -0.01203645  | DUSP6                       |
| chr4  | 151935870 | 151936810 | 941  | * | 12 | 4.54769E-10 | 0.004423631 | 0.086536112 | 0.010609477 | -0.027172433 | 0.006039864  | LRBA                        |
| chr5  | 98108744  | 98109470  | 727  | * | 11 | 4.22285E-09 | 0.013324861 | 0.086559818 | 0.01605006  | -0.087595749 | -0.007921939 | RGMB, RGMB-AS1              |
| chr4  | 68566961  | 68567439  | 479  | * | 10 | 1.74812E-08 | 0.010910483 | 0.086593612 | 0.026151402 | -0.044773587 | -0.017287912 | UBA6-AS1                    |
| chr12 | 4757717   | 4758503   | 787  | * | 13 | 1.03453E-08 | 0.051485186 | 0.086795853 | 0.036601355 | -0.026185328 | 0.00429633   | RP11-500M8.7, NDUFA9, AKAP3 |
| chr6  | 154359967 | 154360590 | 624  | * | 9  | 4.62354E-08 | 0.01186312  | 0.087046371 | 0.023858486 | 0.116131537  | 0.035403978  | OPRM1                       |
| chr14 | 57856758  | 57857666  | 909  | * | 14 | 1.14751E-09 | 0.084090131 | 0.087079809 | 0.042457124 | -0.106688057 | -0.011423892 | NAA30                       |
| chr12 | 57039784  | 57040486  | 703  | * | 11 | 1.55623E-08 | 0.045901152 | 0.087095144 | 0.036835751 | -0.066310235 | -0.013666827 | ATP5B                       |
| chr19 | 35772657  | 35773718  | 1062 | * | 9  | 9.67297E-09 | 0.001106955 | 0.087120862 | 0.005400968 | 0.101070828  | -0.005274059 | HAMP                        |
| chr1  | 93644951  | 93646783  | 1833 | * | 27 | 6.16349E-14 | 0.026405906 | 0.08719506  | 0.022018514 | -0.043044221 | 0.001666213  | CCDC18, TMED5               |
| chr19 | 34012536  | 34013247  | 712  | * | 12 | 3.54526E-09 | 0.056022409 | 0.087386222 | 0.029962678 | -0.052669926 | -0.006393888 | PEPD                        |
| chr20 | 47835194  | 47836128  | 935  | * | 12 | 4.70345E-09 | 0.012839634 | 0.087653627 | 0.026470908 | 0.054759459  | 0.001129185  | DDX27                       |
| chr10 | 106027915 | 106028628 | 714  | * | 11 | 3.36781E-09 | 0.088455474 | 0.087669831 | 0.053286662 | 0.070131698  | 0.01459212   | MIR4482-1                   |
| chr10 | 104211296 | 104211761 | 466  | * | 9  | 4.26683E-08 | 0.05663951  | 0.088087272 | 0.023960823 | -0.057449676 | -0.029150239 | RP11-181I14.10, C10orf95    |

|       |           |           |      |   |    |             |             |             |             |              |              |                         |
|-------|-----------|-----------|------|---|----|-------------|-------------|-------------|-------------|--------------|--------------|-------------------------|
| chr17 | 72889708  | 72890209  | 502  | * | 11 | 1.75895E-08 | 0.006228009 | 0.088094352 | 0.021536419 | 0.125637803  | 0.014729819  | FADS6                   |
| chr1  | 117664076 | 117665053 | 978  | * | 10 | 3.51112E-09 | 0.031892    | 0.088129621 | 0.020327184 | 0.064871764  | 0.00123353   | TRIM45                  |
| chr1  | 114354442 | 114355622 | 1181 | * | 16 | 4.73232E-11 | 0.016567603 | 0.088195111 | 0.017995332 | 0.103896674  | -0.009230813 | RP5-1073O3.2, RSBN1     |
| chr6  | 26538188  | 26538671  | 484  | * | 8  | 3.17576E-08 | 0.026488555 | 0.088228761 | 0.03195953  | -0.061704505 | -0.028927666 | HMGNA4                  |
| chr13 | 26796192  | 26796831  | 640  | * | 9  | 6.51451E-09 | 0.212756853 | 0.088288963 | 0.092850902 | 0.091247362  | 0.014098341  | RNF6                    |
| chr6  | 29595299  | 29595661  | 363  | * | 9  | 1.65027E-08 | 0.039841572 | 0.08852488  | 0.032536194 | 0.123606019  | 0.042809802  | GABBR1                  |
| chr17 | 47439400  | 47440217  | 818  | * | 10 | 9.40261E-08 | 0.038105629 | 0.088893337 | 0.050452307 | -0.05371649  | -0.014944982 | RP11-1079K10.3, ZNF652  |
| chr6  | 116891948 | 116892775 | 828  | * | 14 | 3.30532E-10 | 0.127639489 | 0.089016541 | 0.034967274 | -0.045271882 | 0.003760077  | RWDD1                   |
| chr3  | 48541379  | 48542288  | 910  | * | 10 | 4.39862E-09 | 0.035751058 | 0.089468195 | 0.013948946 | -0.097793738 | 0.000750728  | SHISA5                  |
| chr1  | 25256369  | 25257599  | 1231 | * | 15 | 4.78225E-11 | 0.071664182 | 0.089477115 | 0.031439791 | 0.11128301   | 0.027103139  | RUNX3                   |
| chr5  | 175815445 | 175815846 | 402  | * | 10 | 5.61545E-08 | 0.214757233 | 0.089490269 | 0.079189948 | -0.030861416 | -0.002051708 | ARL10, HIGD2A, NOP16    |
| chr1  | 231376203 | 231377187 | 985  | * | 16 | 3.06611E-10 | 0.028903815 | 0.089505882 | 0.033668882 | -0.033329835 | 0.002517539  | GNPAT, C1orf131         |
| chr19 | 4867785   | 4868496   | 712  | * | 9  | 5.08348E-08 | 0.087408294 | 0.090089259 | 0.039059283 | 0.0641028    | 0.001585898  |                         |
| chr21 | 47604291  | 47604898  | 608  | * | 4  | 2.23376E-08 | 0.005582833 | 0.090112403 | 0.017743107 | -0.223103689 | -0.135374836 | SPATC1L                 |
| chr1  | 165667743 | 165668349 | 607  | * | 12 | 8.47684E-10 | 0.11938232  | 0.090164436 | 0.083935506 | -0.035510296 | -0.0123666   | RP11-466F5.6, ALDH9A1   |
| chr3  | 49027117  | 49028001  | 885  | * | 18 | 7.61337E-11 | 0.015391502 | 0.090280746 | 0.040418723 | 0.026932675  | -0.001328675 | P4HTM, RP13-131K19.2    |
| chr3  | 186287958 | 186288771 | 814  | * | 13 | 1.00226E-08 | 0.038862431 | 0.090533315 | 0.031989303 | -0.035345026 | -0.001778393 | DNAJB11, TBCCD1         |
| chr1  | 173793075 | 173793936 | 862  | * | 17 | 4.85621E-09 | 0.144616218 | 0.090553176 | 0.118255328 | -0.044958677 | -0.009254769 | DARS2, CENPL            |
| chr19 | 44079778  | 44079985  | 208  | * | 7  | 3.58513E-08 | 0.036725545 | 0.090604927 | 0.066301232 | -0.044380049 | -0.014660446 | XRCC1, L34079.2         |
| chr12 | 123717050 | 123718706 | 1657 | * | 22 | 5.84974E-16 | 0.000112326 | 0.090767322 | 0.001365142 | -0.055437091 | -0.003615565 | C12orf65, MPHOSPH9      |
| chr7  | 5464498   | 5464875   | 378  | * | 4  | 1.56197E-07 | 0.012142499 | 0.090783885 | 0.031284639 | -0.051824665 | -0.005019734 | TNRC18                  |
| chr2  | 202645530 | 202646449 | 920  | * | 14 | 4.06518E-09 | 0.036097484 | 0.090787265 | 0.028369482 | -0.078194789 | -0.01089966  | ALS2                    |
| chr5  | 33936171  | 33936597  | 427  | * | 11 | 2.32444E-08 | 0.020541883 | 0.090970832 | 0.035343031 | 0.026121449  | 0.011352902  | RXFP3                   |
| chr3  | 50336314  | 50337494  | 1181 | * | 23 | 1.47183E-11 | 0.099204631 | 0.091003245 | 0.058390223 | -0.05061819  | -0.016708273 | HYAL3, NAT6, HYAL1      |
| chr17 | 37843591  | 37844223  | 633  | * | 9  | 2.55535E-09 | 0.021451405 | 0.091261825 | 0.026083812 | 0.101458172  | 0.028439577  | ERBB2, PGAP3            |
| chr6  | 24403062  | 24403712  | 651  | * | 9  | 3.28333E-08 | 0.020140978 | 0.091480155 | 0.020812152 | -0.039386924 | 0.004229379  | MRS2                    |
| chr15 | 59396749  | 59397510  | 762  | * | 12 | 6.78696E-09 | 0.170844376 | 0.091558539 | 0.045154341 | -0.06199126  | -0.020390287 | CCNB2                   |
| chr6  | 30594037  | 30594749  | 713  | * | 15 | 2.03871E-10 | 0.206885707 | 0.091782034 | 0.091058626 | -0.095138662 | 0.012210105  | MRPS18B, ATAT1          |
| chr16 | 66877873  | 66878575  | 703  | * | 9  | 9.42406E-09 | 0.049877167 | 0.091833138 | 0.061880506 | 0.148410277  | 0.027683288  | CA7, NAE1, RP11-61A14.1 |

|       |           |           |      |   |    |             |             |             |             |              |              |                                         |
|-------|-----------|-----------|------|---|----|-------------|-------------|-------------|-------------|--------------|--------------|-----------------------------------------|
| chr3  | 12598043  | 12598824  | 782  | * | 8  | 7.17927E-10 | 0.001121073 | 0.091865422 | 0.006852269 | -0.042721537 | -0.011270215 | MKRN2, C3orf83                          |
| chr19 | 11494980  | 11495077  | 98   | * | 2  | 1.03726E-07 | 0.423976619 | 0.091922914 | 0.182688597 | 0.018733455  | 0.008117261  | EPOR, RGL3                              |
| chr12 | 57633980  | 57635339  | 1360 | * | 12 | 1.99465E-09 | 0.027559832 | 0.091979284 | 0.015677783 | -0.068179057 | -0.007869473 | NDUFA4L2                                |
| chr3  | 15106787  | 15107309  | 523  | * | 10 | 4.88597E-08 | 0.18211664  | 0.091980743 | 0.11209305  | -0.072255296 | -0.022064886 | MRPS25                                  |
| chr16 | 31085157  | 31086340  | 1184 | * | 18 | 1.06425E-10 | 0.0245203   | 0.091981239 | 0.022840713 | -0.041540681 | -0.006954687 | ZNF646, ZNF668                          |
| chr11 | 60673398  | 60674370  | 973  | * | 12 | 6.13019E-09 | 0.00305277  | 0.091986894 | 0.013594813 | -0.036039981 | -0.002710842 | RP11-881M11.2, PRPF19                   |
| chr3  | 19988132  | 19988887  | 756  | * | 9  | 3.41499E-09 | 0.00404064  | 0.092037165 | 0.008735769 | -0.084874323 | -0.022041064 | RAB5A, EFHB                             |
| chr1  | 156252187 | 156253073 | 887  | * | 12 | 1.25614E-09 | 0.006675612 | 0.092264372 | 0.014373814 | 0.060260118  | -0.012471847 | TMEM79, SMG5                            |
| chr16 | 20817639  | 20817951  | 313  | * | 7  | 1.56144E-07 | 0.004918308 | 0.092350575 | 0.017434627 | -0.020565773 | -0.004682951 | AC004381.6, ER12                        |
| chr1  | 3566577   | 3568245   | 1669 | * | 32 | 1.64334E-15 | 0.013638365 | 0.092572493 | 0.010376979 | -0.107234331 | 0.020081089  | WRAP73                                  |
| chr10 | 115933849 | 115934100 | 252  | * | 7  | 1.03675E-07 | 0.096961922 | 0.092903599 | 0.060048906 | 0.030137594  | 0.008558584  | C10orf118, MIR2110                      |
| chr2  | 63815556  | 63816428  | 873  | * | 22 | 9.03804E-11 | 0.232032288 | 0.09290881  | 0.088453441 | -0.078206585 | -0.009854449 | MDH1, WDPCP                             |
| chr6  | 31509147  | 31510735  | 1589 | * | 32 | 8.43301E-12 | 0.181454233 | 0.092971889 | 0.065686869 | -0.082766609 | -0.009506002 | DDX39B-AS1, DDX39B, ATP6V1G2-<br>DDX39B |
| chr7  | 157179773 | 157180126 | 354  | * | 7  | 1.01279E-07 | 0.002191954 | 0.093019224 | 0.00934104  | 0.123148082  | 0.049521917  | DNAJB6                                  |
| chr9  | 34988588  | 34989493  | 906  | * | 6  | 6.11893E-09 | 0.165492871 | 0.093031353 | 0.064467839 | 0.079755901  | 0.017818419  |                                         |
| chr10 | 22624094  | 22625015  | 922  | * | 7  | 1.07137E-08 | 0.019955006 | 0.093067369 | 0.024179476 | 0.07285757   | 0.033853807  |                                         |
| chr1  | 151762906 | 151763866 | 961  | * | 13 | 1.10456E-10 | 0.016226109 | 0.093084115 | 0.021949903 | -0.091905353 | -0.033555669 | RP11-98D18.9, TDRKH                     |
| chr5  | 131132739 | 131133339 | 601  | * | 11 | 6.8124E-08  | 0.048425672 | 0.093173821 | 0.066570947 | 0.022509099  | 0.00725221   |                                         |
| chr3  | 186524859 | 186525224 | 366  | * | 3  | 1.39388E-07 | 0.064614563 | 0.093181431 | 0.069727272 | 0.086127714  | 0.042135223  |                                         |
| chr1  | 211432139 | 211434045 | 1907 | * | 18 | 2.13394E-11 | 0.106582865 | 0.093668298 | 0.070302448 | -0.082293115 | -0.020697903 | RCOR3                                   |
| chr15 | 75135060  | 75136324  | 1265 | * | 12 | 6.45459E-10 | 0.00019631  | 0.093687875 | 0.001800098 | 0.120048903  | 0.026618155  | ULK3, SCAMP2                            |
| chr13 | 38923870  | 38924477  | 608  | * | 13 | 1.11889E-09 | 0.018535888 | 0.093747298 | 0.023235147 | -0.029368016 | -0.001972557 | UFM1                                    |
| chr20 | 2821310   | 2822144   | 835  | * | 17 | 1.16891E-09 | 0.447783125 | 0.093895602 | 0.22230816  | 0.05735173   | 0.009355518  | VPS16, PCED1A                           |
| chr7  | 35293080  | 35293759  | 680  | * | 8  | 2.00478E-08 | 0.008560465 | 0.094056979 | 0.015446724 | 0.063394384  | 0.030318151  | TBX20                                   |
| chr20 | 25604462  | 25605178  | 717  | * | 16 | 7.10119E-10 | 0.128118619 | 0.094193526 | 0.066736979 | 0.154283701  | 0.013633829  | ZNF337-AS1, NANP                        |
| chr5  | 76114373  | 76115672  | 1300 | * | 12 | 1.28392E-09 | 0.1978588   | 0.094376444 | 0.055382663 | 0.022423143  | 0.007764218  | F2RL1                                   |
| chr9  | 130829320 | 130830096 | 777  | * | 7  | 5.9329E-09  | 0.005845229 | 0.094547567 | 0.012516561 | -0.067602681 | -0.012029588 | NAIF1                                   |
| chr12 | 53773602  | 53773854  | 253  | * | 6  | 1.24549E-07 | 0.00910044  | 0.094751842 | 0.025945148 | -0.041002343 | -0.016438998 |                                         |
| chr12 | 50794485  | 50795366  | 882  | * | 12 | 9.77697E-11 | 0.030773525 | 0.094774764 | 0.022084717 | -0.07867182  | -0.006271108 | LARP4                                   |

|       |           |           |      |   |    |             |             |             |             |              |              |                                         |
|-------|-----------|-----------|------|---|----|-------------|-------------|-------------|-------------|--------------|--------------|-----------------------------------------|
| chr17 | 56084468  | 56085409  | 942  | * | 13 | 1.27597E-09 | 0.007193721 | 0.095164686 | 0.026765191 | -0.086302434 | -0.005513226 | SRSF1                                   |
| chr14 | 99947545  | 99948289  | 745  | * | 9  | 2.60874E-09 | 0.073675936 | 0.095175977 | 0.031600544 | 0.02457776   | 0.005697093  | CCNK                                    |
| chr1  | 26560657  | 26561325  | 669  | * | 6  | 2.81239E-08 | 0.058264409 | 0.095223091 | 0.05575101  | -0.066412688 | -0.00911577  | CEP85                                   |
| chr1  | 226249300 | 226249852 | 553  | * | 7  | 7.14624E-09 | 0.009068074 | 0.0953823   | 0.02292738  | -0.138017538 | -0.0164287   | H3F3A, RP11-396C23.4                    |
| chr10 | 22609629  | 22610125  | 497  | * | 8  | 2.39317E-08 | 0.012432728 | 0.095437201 | 0.033593449 | -0.049714976 | -0.014567909 | COMMD3-BMI1                             |
| chr8  | 144328500 | 144329544 | 1045 | * | 12 | 2.96991E-09 | 0.040453417 | 0.095546225 | 0.052751361 | -0.110211404 | -0.028090382 | ZFP41, ZFP41                            |
| chr8  | 124780013 | 124781210 | 1198 | * | 15 | 1.3021E-09  | 0.011422899 | 0.0957506   | 0.022639974 | 0.042415522  | 0.000296407  | FAM91A1                                 |
| chr7  | 156742224 | 156742617 | 394  | * | 5  | 4.02025E-08 | 0.043829444 | 0.095811653 | 0.063154788 | 0.022982206  | 0.004474329  | NOM1                                    |
| chr20 | 2451474   | 2452132   | 659  | * | 9  | 1.43492E-08 | 0.005231917 | 0.095831493 | 0.011671195 | 0.09329405   | 0.004965378  | SNRPB, RP4-734P14.4                     |
| chr16 | 67700461  | 67701378  | 918  | * | 12 | 8.83941E-09 | 0.038095206 | 0.095831649 | 0.041947042 | 0.038722312  | -0.006628553 | C16orf86, ENKD1                         |
| chr2  | 98612331  | 98613076  | 746  | * | 11 | 7.51657E-09 | 0.059655606 | 0.095892387 | 0.036607735 | -0.072758933 | 0.004671498  | TMEM131                                 |
| chr19 | 37063768  | 37064886  | 1119 | * | 17 | 3.31574E-09 | 0.011911809 | 0.096041439 | 0.018374993 | -0.07548781  | -0.00612035  | AC092295.7, ZNF529                      |
| chr1  | 230777617 | 230778283 | 667  | * | 11 | 2.47263E-08 | 0.062936753 | 0.096069074 | 0.076569598 | 0.141315975  | 0.028521843  | COG2                                    |
| chr22 | 50608218  | 50608509  | 292  | * | 3  | 1.02741E-07 | 0.700483516 | 0.096080148 | 0.294951618 | -0.012389737 | -0.006238881 |                                         |
| chr6  | 33159547  | 33160869  | 1323 | * | 19 | 1.94418E-15 | 0.002699093 | 0.09613731  | 0.00500209  | 0.066676464  | 0.010216885  | COL11A2                                 |
| chr11 | 47447566  | 47448534  | 969  | * | 13 | 8.12986E-09 | 0.015532894 | 0.096164586 | 0.019740051 | 0.122103044  | 0.008729982  | PSMC3                                   |
| chr14 | 59950705  | 59951720  | 1016 | * | 17 | 1.97507E-10 | 0.050819883 | 0.096203486 | 0.029939807 | -0.0315915   | 0.000741207  | JKAMP, L3HYPDH, RP11-701B16.2           |
| chr19 | 36235836  | 36236844  | 1009 | * | 14 | 1.13983E-09 | 0.041870252 | 0.096293218 | 0.020760037 | 0.039124398  | -0.001224128 | PSENEN, AC002398.9, AD000671.6, U2AF1L4 |
| chr14 | 94547496  | 94547988  | 493  | * | 12 | 7.87976E-09 | 0.384911012 | 0.096296859 | 0.070326298 | -0.071884402 | -0.010759252 | IFI27L1, DDX24                          |
| chr18 | 3247654   | 3248148   | 495  | * | 5  | 3.0181E-08  | 0.033993911 | 0.096322122 | 0.030915955 | -0.015381558 | 0.004313435  | MYL12A                                  |
| chr1  | 37979729  | 37980592  | 864  | * | 12 | 3.946E-10   | 0.010132421 | 0.096378756 | 0.023940187 | -0.09872427  | -0.022394977 | MEAF6                                   |
| chr8  | 128747564 | 128748337 | 774  | * | 18 | 4.67677E-09 | 0.179017966 | 0.096471782 | 0.128196525 | -0.05126444  | -0.003812024 | MYC                                     |
| chr4  | 57332795  | 57333267  | 473  | * | 8  | 2.22729E-08 | 0.10838364  | 0.096480412 | 0.027917354 | 0.078356908  | 0.02637058   | SRP72                                   |
| chr2  | 211035257 | 211035960 | 704  | * | 7  | 4.21238E-09 | 0.023216526 | 0.096584971 | 0.019661532 | 0.030221435  | -0.000850737 | KANSL1L                                 |
| chr14 | 58711498  | 58711972  | 475  | * | 8  | 4.47356E-08 | 0.002354958 | 0.096593994 | 0.011416667 | -0.029611411 | -0.003665479 | PSMA3, C14orf37                         |
| chr22 | 39548724  | 39549099  | 376  | * | 5  | 7.43758E-08 | 0.694067533 | 0.096742232 | 0.349664917 | -0.037089693 | -0.008211392 |                                         |
| chr5  | 37371047  | 37371931  | 885  | * | 14 | 1.33718E-11 | 0.007077903 | 0.096803734 | 0.011406751 | 0.130815739  | 0.020955333  | NUP155                                  |
| chr3  | 48956740  | 48957001  | 262  | * | 6  | 2.73812E-08 | 0.094295634 | 0.096820434 | 0.084380928 | -0.030190323 | -0.001414498 | ARIH2, ARIH2OS                          |
| chr2  | 47142555  | 47144128  | 1574 | * | 16 | 2.14871E-10 | 0.074743791 | 0.097017339 | 0.017765055 | 0.108724218  | 0.000221393  | TTC7A, MCFD2                            |

|       |           |           |      |   |    |             |             |             |             |              |              |                                      |
|-------|-----------|-----------|------|---|----|-------------|-------------|-------------|-------------|--------------|--------------|--------------------------------------|
| chr12 | 123380523 | 123381231 | 709  | * | 11 | 1.42049E-08 | 0.048083934 | 0.09727608  | 0.030809729 | 0.115606643  | 0.029339724  | VPS37B                               |
| chr11 | 130184488 | 130185670 | 1183 | * | 16 | 4.90352E-12 | 0.027686258 | 0.097351383 | 0.014375716 | -0.152860261 | -0.025862561 | RP11-121M22.1, ZBTB44                |
| chr17 | 72772340  | 72773085  | 746  | * | 14 | 4.88629E-09 | 0.009915491 | 0.097499322 | 0.029547631 | -0.311608896 | -0.037270015 | TMEM104, NAT9                        |
| chr19 | 36238931  | 36239797  | 867  | * | 11 | 4.73013E-09 | 0.08994397  | 0.097591106 | 0.04338749  | -0.023517178 | 0.001784469  | AC002398.9, LIN37, AC002398.11       |
| chr17 | 35969138  | 35969956  | 819  | * | 16 | 7.52861E-09 | 0.115814012 | 0.097832098 | 0.070712201 | 0.06948802   | 0.00479728   | RP11-697E22.1, SYNRG, DDX52          |
| chr21 | 37432039  | 37433546  | 1508 | * | 22 | 2.10467E-11 | 0.274235483 | 0.098011615 | 0.064834278 | 0.064656099  | 0.009402024  | AP000688.11, SETD4                   |
| chr12 | 49658188  | 49659154  | 967  | * | 10 | 4.00489E-10 | 0.009568847 | 0.098075889 | 0.009680644 | -0.0542173   | -0.002116531 | TUBA1C, RP11-977B10.2, RP11-161H23.5 |
| chr8  | 21998797  | 21999976  | 1180 | * | 15 | 3.07881E-10 | 0.009948684 | 0.098147683 | 0.017045677 | 0.044293328  | 0.014367223  | REEP4                                |
| chr8  | 23385905  | 23386623  | 719  | * | 13 | 1.17004E-08 | 0.029370348 | 0.09843685  | 0.045637192 | 0.050906142  | -0.007049575 | SLC25A37                             |
| chr6  | 32936520  | 32937207  | 688  | * | 5  | 9.74991E-10 | 0.004992641 | 0.098513485 | 0.019022818 | -0.092021888 | -0.046554671 | BRD2, HLA-DMA                        |
| chr15 | 70388682  | 70389744  | 1063 | * | 13 | 2.33448E-10 | 0.127090743 | 0.098548108 | 0.090790368 | -0.040906469 | -0.004164807 | TLE3                                 |
| chr6  | 28983835  | 28985069  | 1235 | * | 23 | 5.66018E-12 | 0.073111719 | 0.098655495 | 0.032186892 | 0.119028885  | 0.010217263  |                                      |
| chr22 | 32870150  | 32871233  | 1084 | * | 15 | 4.63572E-10 | 0.058041016 | 0.098706993 | 0.039080877 | -0.037430973 | -0.000249287 | FBXO7                                |
| chr5  | 16617252  | 16617354  | 103  | * | 2  | 1.41987E-07 | 0.080893833 | 0.098802756 | 0.097436408 | 0.01638855   | 0.005281336  | RP11-260E18.1, CTC-461F20.1          |
| chr16 | 72127419  | 72128225  | 807  | * | 17 | 4.65637E-09 | 0.104431452 | 0.09898698  | 0.095528259 | -0.047206416 | -0.007995136 | DHX38, TXNL4B                        |
| chr1  | 40505597  | 40506858  | 1262 | * | 18 | 1.0575E-10  | 0.014405688 | 0.099099342 | 0.013519234 | -0.03671761  | -0.006644458 | CAP1                                 |
| chr19 | 49496473  | 49497177  | 705  | * | 13 | 4.42589E-10 | 0.008646197 | 0.099118136 | 0.014716507 | -0.032230776 | 0.001689956  | RUVBL2, GYS1                         |
| chr19 | 13055829  | 13056485  | 657  | * | 10 | 1.43868E-10 | 0.00384132  | 0.099318585 | 0.011120857 | -0.061665905 | -0.025387084 |                                      |
| chr17 | 39968505  | 39969397  | 893  | * | 17 | 2.6992E-14  | 0.004949422 | 0.099431753 | 0.006738849 | 0.084446568  | 0.01544371   | FKBP10, LEPREL4                      |
| chr1  | 151020868 | 151021033 | 166  | * | 3  | 1.37557E-07 | 0.125387387 | 0.099487476 | 0.110250755 | -0.025267029 | -0.004907213 | C1orf56                              |
| chr10 | 123356041 | 123356219 | 179  | * | 3  | 1.27004E-07 | 0.106570942 | 0.099602523 | 0.124529001 | 0.067318997  | 0.062453176  | FGFR2                                |
| chr3  | 131100199 | 131100713 | 515  | * | 9  | 6.62447E-08 | 0.005239933 | 0.099625998 | 0.02289124  | -0.045251617 | 0.001902637  | NUDT16, RP11-933H2.4                 |
| chr11 | 118901039 | 118901842 | 804  | * | 12 | 4.94834E-10 | 0.005598205 | 0.099688108 | 0.009835362 | -0.049708432 | -0.012419194 | SLC37A4                              |
| chr6  | 109415607 | 109417087 | 1481 | * | 18 | 1.63664E-11 | 0.001265045 | 0.099715059 | 0.006449709 | -0.029214488 | -0.005358786 | CEP57L1, SESN1                       |
| chr19 | 17581060  | 17581966  | 907  | * | 11 | 4.94072E-11 | 0.00013684  | 0.099725731 | 0.002298633 | -0.032401564 | -0.019765978 | SLC27A1                              |
| chr16 | 56485177  | 56485501  | 325  | * | 10 | 5.73107E-09 | 0.032348075 | 0.099873109 | 0.023376472 | -0.075212263 | -0.028208727 | OGFOD1, NUDT21                       |
| chr8  | 144691562 | 144691748 | 187  | * | 2  | 3.77467E-08 | 0.078321421 | 0.100182142 | 0.096193338 | -0.022996043 | -0.006649802 | PYCRL                                |
| chr15 | 41805868  | 41806588  | 721  | * | 12 | 2.02799E-09 | 0.007785989 | 0.100332038 | 0.019708084 | 0.132353086  | 0.034554386  | LTK                                  |
| chr11 | 118401666 | 118402342 | 677  | * | 11 | 9.26728E-09 | 0.039198012 | 0.100457913 | 0.040319442 | -0.070969007 | -0.01340616  | TTC36, TMEM25, RP11-770J1.3          |

|       |           |           |      |   |    |             |             |             |             |              |              |                                                |
|-------|-----------|-----------|------|---|----|-------------|-------------|-------------|-------------|--------------|--------------|------------------------------------------------|
| chr20 | 57462978  | 57467268  | 4291 | * | 65 | 9.88089E-20 | 0.00028398  | 0.10083522  | 0.000536576 | -0.178301996 | -0.036440815 | GNAS, RP1-309F20.3                             |
| chr5  | 96270961  | 96271822  | 862  | * | 11 | 1.06486E-08 | 0.031152634 | 0.100995561 | 0.036868999 | -0.047293738 | -0.017896104 | LNPEP, CTD-2260A17.2                           |
| chr1  | 26145578  | 26147252  | 1675 | * | 14 | 3.12523E-11 | 0.067390534 | 0.101004719 | 0.042920449 | -0.047212853 | -0.001169786 | RP1-317E23.6, MTFR1L, RP1-317E23.3, AL020996.1 |
| chr6  | 27839850  | 27840257  | 408  | * | 9  | 8.64083E-09 | 0.037760471 | 0.101105086 | 0.021773206 | -0.066592083 | -0.023043916 | HIST1H3I                                       |
| chr6  | 122720467 | 122720929 | 463  | * | 11 | 4.76208E-08 | 0.086839986 | 0.101363706 | 0.044229855 | 0.026198901  | 0.004617227  | HSF2                                           |
| chr1  | 42384474  | 42384647  | 174  | * | 4  | 1.82567E-07 | 0.041427988 | 0.101459215 | 0.053749862 | 0.129328423  | 0.092965898  | HIVEP3                                         |
| chr3  | 138067053 | 138067500 | 448  | * | 10 | 4.25088E-08 | 0.166334932 | 0.101540331 | 0.060343692 | -0.05777968  | -0.006869593 | MRAS                                           |
| chr8  | 25316023  | 25317051  | 1029 | * | 20 | 3.93224E-13 | 0.001074338 | 0.101544142 | 0.006234187 | -0.083938782 | -0.005922543 | CDCA2                                          |
| chr6  | 32939192  | 32943025  | 3834 | * | 71 | 3.17127E-15 | 0.11119937  | 0.101598609 | 0.056874143 | -0.160626105 | 0.00146622   | BRD2, XXbac-BPG181M17.6                        |
| chr14 | 81686781  | 81688076  | 1296 | * | 18 | 5.34536E-10 | 0.006650965 | 0.101626136 | 0.016209208 | 0.113995611  | -0.001711169 | GTF2A1                                         |
| chr3  | 32611876  | 32613083  | 1208 | * | 15 | 1.92834E-09 | 0.023651305 | 0.101641928 | 0.029439799 | 0.056236591  | -0.000127712 | DYNC1L1                                        |
| chr18 | 904243    | 904963    | 721  | * | 11 | 1.14763E-08 | 0.641642554 | 0.101643077 | 0.221125191 | 0.089541456  | 0.029113015  | ADCYAP1, RP11-672L10.3, RP11-672L10.2          |
| chr5  | 140070872 | 140071988 | 1117 | * | 18 | 8.6685E-12  | 0.033454873 | 0.101668204 | 0.024075943 | 0.128153778  | 0.003262606  | HARS2, HARS                                    |
| chr19 | 42721812  | 42722910  | 1099 | * | 14 | 2.28194E-08 | 0.014837051 | 0.101919016 | 0.02388988  | -0.04535175  | -0.009978625 | DEDD2                                          |
| chr17 | 41623744  | 41624234  | 491  | * | 11 | 2.7441E-08  | 0.019084784 | 0.10205292  | 0.03639239  | -0.036803962 | 0.006657588  | RP11-392O1.4, ETV4                             |
| chr6  | 88299463  | 88300299  | 837  | * | 16 | 5.94385E-09 | 0.080992073 | 0.10217779  | 0.063214582 | -0.031837399 | 0.004116924  | ORC3, RARS2                                    |
| chr1  | 10003059  | 10003752  | 694  | * | 12 | 3.24806E-09 | 0.037137658 | 0.102194911 | 0.03861375  | -0.046496115 | -0.003834501 | RP11-84A14.4, NMNAT1, LZIC                     |
| chr8  | 140717297 | 140717689 | 393  | * | 4  | 4.65602E-08 | 0.151314306 | 0.102484297 | 0.116568428 | 0.104682126  | 0.033832308  |                                                |
| chr2  | 240322401 | 240323028 | 628  | * | 6  | 2.7854E-08  | 0.033112574 | 0.102587573 | 0.054215462 | 0.015202843  | -0.003369937 | HDAC4                                          |
| chr20 | 57226445  | 57227438  | 994  | * | 11 | 4.84764E-10 | 0.041153596 | 0.102673135 | 0.026721649 | -0.04845791  | -0.009958388 | STX16, STX16-NPEPL1                            |
| chr16 | 56641777  | 56642761  | 985  | * | 11 | 2.35109E-09 | 0.046526778 | 0.102772588 | 0.016398984 | 0.120774838  | 0.01046814   | MT2A                                           |
| chr17 | 1531579   | 1531887   | 309  | * | 7  | 9.21282E-08 | 0.059455295 | 0.103211862 | 0.055242741 | -0.021398988 | -0.00691069  | SLC43A2                                        |
| chr13 | 103532159 | 103532435 | 277  | * | 8  | 5.18962E-09 | 0.000970781 | 0.10341211  | 0.005812277 | 0.103669693  | 0.063044869  |                                                |
| chr22 | 41985886  | 41986335  | 450  | * | 9  | 1.91345E-08 | 0.005121766 | 0.103424409 | 0.014214586 | -0.078806221 | -0.040157523 | PMM1                                           |
| chr3  | 49711033  | 49712339  | 1307 | * | 18 | 1.23807E-11 | 0.027324478 | 0.103529963 | 0.01928246  | -0.072184251 | -0.027314661 | APEH                                           |
| chr12 | 82752376  | 82752887  | 512  | * | 10 | 2.9942E-08  | 0.046353653 | 0.104118684 | 0.05782619  | -0.035085491 | -0.002499257 | METTL25, CCDC59                                |
| chr19 | 46388787  | 46390155  | 1369 | * | 11 | 8.26169E-10 | 0.003496871 | 0.104393115 | 0.009812926 | 0.027770503  | 0.009556405  | IRF2BP1                                        |
| chr19 | 52900469  | 52901124  | 656  | * | 11 | 2.45117E-08 | 0.068772059 | 0.104457404 | 0.051642827 | 0.052416261  | -0.007016377 | ZNF528, CTD-3018O17.3                          |
| chr1  | 185125656 | 185126416 | 761  | * | 15 | 8.48026E-08 | 0.171617014 | 0.104604823 | 0.101687084 | -0.072944013 | -0.007530838 | SWT1, TRMT1L                                   |



|       |           |           |      |   |    |             |             |             |             |              |              |                                |
|-------|-----------|-----------|------|---|----|-------------|-------------|-------------|-------------|--------------|--------------|--------------------------------|
| chr7  | 137686767 | 137687260 | 494  | * | 12 | 5.79101E-09 | 0.007563872 | 0.104724233 | 0.025939043 | -0.032566099 | -0.003413805 | AKR1D1, CREB3L2                |
| chr3  | 127770634 | 127771325 | 692  | * | 9  | 3.89068E-08 | 0.154843214 | 0.10476688  | 0.049693127 | -0.070774473 | -0.00181178  | SEC61A1                        |
| chr17 | 4046031   | 4047033   | 1003 | * | 14 | 4.70267E-11 | 0.000621935 | 0.104868532 | 0.005012787 | -0.073044254 | -0.005663051 | CYB5D2, ZZEF1                  |
| chr2  | 99771257  | 99771627  | 371  | * | 7  | 7.21044E-08 | 0.219989137 | 0.105071009 | 0.093088465 | 0.011826766  | 0.005570559  | C2orf15, LIPT1, MRPL30, TSGA10 |
| chr1  | 228327428 | 228327881 | 454  | * | 13 | 5.62338E-09 | 0.041264705 | 0.105115162 | 0.037665763 | -0.096601642 | -0.029374461 | GUK1                           |
| chr4  | 174254507 | 174255944 | 1438 | * | 21 | 3.13238E-13 | 0.022166917 | 0.105437835 | 0.031028205 | -0.06396651  | -0.014538532 | HMGB2                          |
| chr6  | 32820249  | 32822346  | 2098 | * | 53 | 1.01003E-15 | 0.533464804 | 0.105446938 | 0.177871397 | -0.108296264 | -0.005469914 | PSMB9, TAP1                    |
| chr13 | 111522222 | 111522314 | 93   | * | 3  | 1.11816E-07 | 0.017637762 | 0.105540521 | 0.03967395  | 0.144292108  | 0.115039145  |                                |
| chr15 | 90776873  | 90777598  | 726  | * | 9  | 8.45806E-08 | 0.523128357 | 0.10579194  | 0.182513191 | 0.020864157  | 0.006879823  | GDPGP1, CIB1                   |
| chr17 | 8152333   | 8152823   | 491  | * | 11 | 3.27133E-08 | 0.017663697 | 0.105801594 | 0.032336315 | -0.05279043  | -0.00161971  | PFAS                           |
| chr15 | 42787797  | 42788175  | 379  | * | 6  | 6.12989E-08 | 0.010952299 | 0.105865973 | 0.031183456 | -0.036954393 | 0.007803271  | SNAP23                         |
| chr10 | 51572203  | 51572718  | 516  | * | 9  | 4.94257E-08 | 0.005025095 | 0.106053934 | 0.017363057 | -0.04541885  | -0.021470544 | NCOA4                          |
| chr8  | 37887424  | 37887635  | 212  | * | 2  | 9.39433E-08 | 0.047093153 | 0.106073135 | 0.070787899 | -0.050503421 | -0.010743392 |                                |
| chr6  | 83775339  | 83775943  | 605  | * | 13 | 6.39542E-09 | 0.047138815 | 0.106115486 | 0.039998082 | 0.03046011   | 0.006721495  | UBE3D                          |
| chr11 | 35160827  | 35160892  | 66   | * | 3  | 1.89129E-07 | 0.10376943  | 0.106132414 | 0.129544451 | -0.039755328 | -0.002559535 | CD44                           |
| chr2  | 153573883 | 153575050 | 1168 | * | 12 | 8.4575E-09  | 0.249636644 | 0.106311994 | 0.100409926 | -0.134606737 | -0.010113588 | ARL6IP6, PRPF40A               |
| chr11 | 125439578 | 125439882 | 305  | * | 3  | 4.21793E-08 | 0.01872676  | 0.106318545 | 0.041456666 | 0.023737877  | 0.015708198  | EI24                           |
| chr12 | 30907191  | 30907923  | 733  | * | 11 | 8.31948E-09 | 0.033498124 | 0.106321216 | 0.025923357 | -0.072577948 | -0.010759831 | CAPRIN2                        |
| chr5  | 145562010 | 145562627 | 618  | * | 14 | 7.81114E-09 | 0.096548888 | 0.106347718 | 0.054537603 | -0.044879882 | -0.009081588 | LARS                           |
| chr14 | 69725831  | 69727860  | 2030 | * | 24 | 2.20428E-11 | 0.004477526 | 0.106358769 | 0.009307768 | 0.052655538  | 0.01019756   | GALNT16, RP11-363J20.2         |
| chr2  | 70141705  | 70142523  | 819  | * | 11 | 3.72367E-09 | 0.03265412  | 0.106383156 | 0.032269232 | -0.041312877 | -0.014168719 | MXD1                           |
| chr20 | 30192898  | 30193601  | 704  | * | 11 | 5.52124E-09 | 0.066393823 | 0.106532317 | 0.020599174 | 0.020663185  | 0.005604079  | ID1                            |
| chr12 | 85306323  | 85307131  | 809  | * | 13 | 3.92476E-08 | 0.041817466 | 0.106913069 | 0.05874272  | -0.081470782 | -0.000738062 | SLC6A15                        |
| chr1  | 168148299 | 168148540 | 242  | * | 3  | 1.44447E-07 | 0.099204245 | 0.106957637 | 0.112134691 | 0.01854704   | 0.011864151  | TIPRL                          |
| chr3  | 13520959  | 13521915  | 957  | * | 24 | 3.98936E-10 | 0.421552333 | 0.107156355 | 0.1587128   | 0.024871368  | 0.003150811  | HDAC11, HDAC11-AS1             |
| chr10 | 101088508 | 101089149 | 642  | * | 11 | 6.7525E-10  | 0.005807466 | 0.107175894 | 0.023659418 | 0.074632734  | 0.02615276   | CNNM1                          |
| chr2  | 47168440  | 47169026  | 587  | * | 8  | 3.21433E-08 | 0.271830498 | 0.107517829 | 0.129399355 | 0.026085337  | -0.0012034   | TTC7A, MCFD2                   |
| chr1  | 24285274  | 24285721  | 448  | * | 7  | 5.18428E-08 | 0.067390821 | 0.10759969  | 0.051880222 | 0.022989313  | -0.001405662 | PNRC2, CNR2                    |
| chr12 | 44229417  | 44229512  | 96   | * | 2  | 1.60172E-07 | 0.055955576 | 0.107813078 | 0.080148324 | -0.020735679 | -0.003919937 |                                |

|       |           |           |      |   |    |             |             |             |             |              |              |                           |
|-------|-----------|-----------|------|---|----|-------------|-------------|-------------|-------------|--------------|--------------|---------------------------|
| chr14 | 69260653  | 69261160  | 508  | * | 7  | 9.56178E-09 | 0.019265084 | 0.107954997 | 0.024829602 | 0.062466985  | 0.008779875  | ZFP36L1                   |
| chr1  | 174967663 | 174968509 | 847  | * | 11 | 1.25954E-08 | 0.168081312 | 0.107965012 | 0.103056528 | 0.123502739  | 0.026652971  | CACYBP                    |
| chr3  | 172428426 | 172429421 | 996  | * | 14 | 3.53719E-10 | 0.100096589 | 0.107989097 | 0.026208645 | -0.072073355 | -0.008025302 | NCEH1                     |
| chr11 | 62495049  | 62495467  | 419  | * | 5  | 1.40585E-07 | 0.1251258   | 0.108072467 | 0.130305265 | 0.030357594  | 0.004218582  |                           |
| chr5  | 68462459  | 68462783  | 325  | * | 7  | 4.56024E-08 | 0.002885736 | 0.10814362  | 0.015362119 | 0.070932104  | 0.036242553  |                           |
| chr3  | 13114441  | 13114803  | 363  | * | 7  | 8.07172E-08 | 0.009734466 | 0.108260652 | 0.025605134 | 0.116363361  | 0.056573663  | IQSEC1                    |
| chr1  | 10092629  | 10093824  | 1196 | * | 17 | 1.9331E-11  | 0.005798818 | 0.108291653 | 0.018412872 | -0.041139105 | 0.00346589   | UBE4B                     |
| chr1  | 200011273 | 200011988 | 716  | * | 13 | 1.82808E-09 | 0.006876909 | 0.108534196 | 0.020658598 | 0.051430934  | 0.013765678  | NR5A2                     |
| chr2  | 145274125 | 145274441 | 317  | * | 3  | 1.74708E-08 | 0.01897499  | 0.108766148 | 0.042343297 | 0.03398773   | 0.016297605  | ZEB2                      |
| chr6  | 31669485  | 31671391  | 1907 | * | 40 | 8.62582E-18 | 0.006130401 | 0.10924257  | 0.009950952 | 0.127871446  | -0.006830323 | ABHD16A, XXbac-BPG32J3.20 |
| chr14 | 64970743  | 64972179  | 1437 | * | 16 | 2.76789E-09 | 0.228518564 | 0.109295519 | 0.089299302 | -0.039548364 | -0.003288225 | ZBTB1, ZBTB25             |
| chr8  | 118532625 | 118533254 | 630  | * | 11 | 4.42761E-09 | 0.005198563 | 0.109358054 | 0.0161987   | -0.052844336 | -0.016362349 | MED30                     |
| chr11 | 44331893  | 44333192  | 1300 | * | 38 | 5.65147E-18 | 0.051643198 | 0.109484762 | 0.02106776  | 0.093622145  | 0.019983766  |                           |
| chr11 | 59522428  | 59523399  | 972  | * | 12 | 8.45618E-09 | 0.034163583 | 0.109608675 | 0.038562036 | -0.026999045 | -0.000233953 | STX3, AP000640.10         |
| chr6  | 32121055  | 32123034  | 1980 | * | 49 | 6.33827E-20 | 0.043174793 | 0.109686037 | 0.037029542 | 0.15375517   | 0.017176859  | PPT2, PPT2-EGFL8, PRRT1   |
| chr7  | 95951129  | 95951808  | 680  | * | 12 | 2.5233E-08  | 0.120528725 | 0.109689191 | 0.070120202 | 0.036070767  | 0.007778335  | SLC25A13                  |
| chr3  | 38065951  | 38066270  | 320  | * | 3  | 7.99368E-08 | 0.017147454 | 0.109977684 | 0.039850034 | 0.033506207  | 0.022960713  | PLCD1                     |
| chr22 | 22221878  | 22222305  | 428  | * | 8  | 6.84646E-08 | 0.007026813 | 0.11009115  | 0.0180028   | -0.034540268 | -0.009409656 | MAPK1                     |
| chr1  | 150947566 | 150947665 | 100  | * | 5  | 2.00221E-07 | 0.027051893 | 0.110134678 | 0.06379377  | 0.019985838  | 0.011761676  | RP11-316M1.3              |
| chr22 | 41681654  | 41682824  | 1171 | * | 18 | 6.20033E-10 | 0.389285823 | 0.110255644 | 0.069837758 | -0.09367737  | -0.004592322 | RANGAP1                   |
| chr6  | 146350041 | 146350618 | 578  | * | 10 | 1.01309E-07 | 0.075284617 | 0.110277394 | 0.102865565 | 0.054737447  | 0.010692742  | GRM1                      |
| chr17 | 4613328   | 4613992   | 665  | * | 10 | 8.05001E-09 | 0.008341989 | 0.110505527 | 0.025730183 | -0.068804417 | -0.01876546  | ARRB2                     |
| chr17 | 26662236  | 26662842  | 607  | * | 13 | 9.35536E-08 | 0.025704108 | 0.11077619  | 0.066056716 | -0.021032825 | 0.000881856  | TNFAIP1, IFT20            |
| chr12 | 56521892  | 56522453  | 562  | * | 9  | 7.04878E-09 | 0.008229955 | 0.111114623 | 0.027661584 | -0.024969151 | -0.010860368 | ESYT1, RP11-603J24.5      |
| chr11 | 125461928 | 125462736 | 809  | * | 10 | 1.87111E-08 | 0.099717378 | 0.111270696 | 0.06063511  | -0.026554782 | 0.001871856  | STT3A, STT3A-AS1          |
| chr3  | 33482134  | 33482401  | 268  | * | 6  | 9.33465E-08 | 0.07934335  | 0.111516679 | 0.087147188 | 0.011544105  | 0.002951791  | UBP1                      |
| chr12 | 27091095  | 27091484  | 390  | * | 10 | 4.36656E-09 | 0.011268451 | 0.111829253 | 0.017269389 | -0.082886956 | -0.011563024 | FGFR1OP2, ASUN            |
| chr2  | 201753695 | 201754268 | 574  | * | 12 | 2.14719E-08 | 0.011087138 | 0.11217699  | 0.02947579  | -0.071398295 | -0.015892888 | NIF3L1, PPIL3             |
| chr6  | 151560577 | 151561366 | 790  | * | 11 | 5.24433E-09 | 0.01187977  | 0.112493456 | 0.017824845 | 0.084953982  | 0.031334298  | AKAP12                    |

|       |           |           |      |   |    |             |             |             |             |              |              |                            |
|-------|-----------|-----------|------|---|----|-------------|-------------|-------------|-------------|--------------|--------------|----------------------------|
| chr19 | 19754386  | 19754909  | 524  | * | 10 | 3.28537E-08 | 0.020038003 | 0.112512257 | 0.029000659 | 0.028574631  | 0.001979018  | GMIP                       |
| chr14 | 77563968  | 77564635  | 668  | * | 11 | 3.61347E-08 | 0.012484139 | 0.112759154 | 0.035060826 | 0.020921171  | 0.004554941  | CIPC                       |
| chr17 | 45726624  | 45727226  | 603  | * | 11 | 1.54273E-08 | 0.024711519 | 0.112885394 | 0.034823792 | -0.061325971 | -0.019791951 | KPNB1, RP11-580I16.2       |
| chr15 | 45879275  | 45879998  | 724  | * | 15 | 2.10175E-09 | 0.042438561 | 0.112976857 | 0.029471743 | -0.042971792 | -0.000954655 | BLOC1S6, RP11-96O20.4      |
| chr2  | 216946279 | 216946473 | 195  | * | 5  | 1.37372E-07 | 0.19222316  | 0.11298265  | 0.118380514 | -0.044568404 | -0.005304057 | PECR                       |
| chr17 | 5322575   | 5323521   | 947  | * | 19 | 1.93634E-10 | 0.368971552 | 0.113030851 | 0.106935171 | -0.041362225 | -0.006615122 | RPAIN, NUP88               |
| chr19 | 52872727  | 52873277  | 551  | * | 12 | 8.95451E-08 | 0.011258343 | 0.113572612 | 0.036179091 | 0.101003432  | 0.029992753  | ZNF880                     |
| chr2  | 26568235  | 26569594  | 1360 | * | 16 | 3.09184E-10 | 0.062889079 | 0.113643667 | 0.028497929 | -0.049469705 | -8.34883E-05 | EPT1, GPR113               |
| chr10 | 102746998 | 102747346 | 349  | * | 11 | 1.335E-07   | 0.191585893 | 0.113668656 | 0.10480248  | -0.041916482 | -0.00554782  | C10orf2, MRPL43            |
| chr19 | 45680969  | 45682354  | 1386 | * | 18 | 6.79451E-12 | 0.002532621 | 0.113738933 | 0.014439487 | -0.068071525 | -0.011318608 | MARK4, BLOC1S3, TRAPPC6A   |
| chr19 | 16186840  | 16187364  | 525  | * | 7  | 9.18203E-08 | 0.016219769 | 0.113960305 | 0.045885508 | -0.057227629 | 5.90675E-05  | TPM4                       |
| chr2  | 228028931 | 228029924 | 994  | * | 11 | 2.10573E-10 | 0.018424311 | 0.114067569 | 0.028586942 | 0.058992966  | 0.012926378  | COL4A3                     |
| chr1  | 212208516 | 212209225 | 710  | * | 15 | 4.44977E-09 | 0.00880104  | 0.114630801 | 0.037903689 | 0.059050064  | -0.002268756 | DTL, INTS7                 |
| chr7  | 72936186  | 72937171  | 986  | * | 13 | 1.25766E-08 | 0.025956678 | 0.114999644 | 0.054750198 | -0.024570699 | 0.004451749  | BAZ1B                      |
| chr1  | 35544630  | 35544839  | 210  | * | 5  | 1.8611E-07  | 0.034754122 | 0.115108187 | 0.067321509 | 0.013258066  | 0.009018346  | ZMYM1                      |
| chr13 | 41885260  | 41885657  | 398  | * | 6  | 5.21847E-08 | 0.859676613 | 0.115169471 | 0.495712034 | 0.032861654  | 0.00383193   | NAA16                      |
| chr6  | 31148332  | 31148748  | 417  | * | 15 | 2.18346E-09 | 0.003868159 | 0.115253472 | 0.025246514 | 0.11353095   | 0.062225214  | POU5F1                     |
| chr17 | 41277059  | 41277541  | 483  | * | 15 | 8.88682E-09 | 0.081341933 | 0.11618692  | 0.070423354 | -0.057994235 | -0.016158457 | BRCA1                      |
| chr22 | 51020960  | 51021833  | 874  | * | 14 | 2.30146E-08 | 0.031704546 | 0.116285552 | 0.050342355 | -0.030355898 | 0.001587375  | CHKB-AS1, CHKB-CPT1B, CHKB |
| chr1  | 207494472 | 207495363 | 892  | * | 14 | 3.49457E-09 | 0.012349633 | 0.116388227 | 0.027015976 | -0.037835425 | -0.011424964 | CD55                       |
| chr10 | 89621419  | 89623157  | 1739 | * | 45 | 7.31228E-15 | 0.099476401 | 0.116441193 | 0.093575305 | -0.04685471  | -0.003888637 | PTEN, KLLN                 |
| chr17 | 46018654  | 46019006  | 353  | * | 10 | 8.52284E-08 | 0.013133394 | 0.116801493 | 0.030586871 | -0.052489113 | -0.007788472 | PNPO, AC003665.1           |
| chr6  | 31125930  | 31127527  | 1598 | * | 35 | 8.87897E-12 | 0.394223992 | 0.116841706 | 0.116973156 | 0.111840282  | 0.00896514   | TCF19, CCHCR1              |
| chr12 | 31743367  | 31743464  | 98   | * | 3  | 2.47815E-08 | 0.175973772 | 0.11687691  | 0.132875459 | -0.031164165 | -0.014882044 | DENND5B-AS1, DENND5B       |
| chr19 | 18433592  | 18433643  | 52   | * | 2  | 1.23807E-07 | 0.055571488 | 0.116980483 | 0.082420917 | -0.019176929 | -0.003906326 | LSM4                       |
| chr16 | 67694647  | 67695984  | 1338 | * | 20 | 8.17137E-10 | 0.255879418 | 0.117019386 | 0.143901228 | 0.088543883  | 0.013341721  | PARD6A, ACD                |
| chr2  | 29092871  | 29093594  | 724  | * | 12 | 1.43804E-08 | 0.006582375 | 0.117120431 | 0.017441746 | -0.021692142 | 0.003039539  | TRMT61B                    |
| chr12 | 132195279 | 132195732 | 454  | * | 8  | 1.17325E-07 | 0.030186158 | 0.117693457 | 0.055461912 | 0.019077993  | 0.004148286  | SFSWAP                     |
| chr15 | 83316640  | 83316962  | 323  | * | 6  | 1.14449E-08 | 0.215776895 | 0.117749036 | 0.22577501  | 0.072172525  | 0.020037679  | RP11-752G15.3, CPEB1       |

|       |           |           |      |   |    |             |             |             |             |              |              |                                              |
|-------|-----------|-----------|------|---|----|-------------|-------------|-------------|-------------|--------------|--------------|----------------------------------------------|
| chr2  | 63274857  | 63277327  | 2471 | * | 34 | 8.64229E-14 | 0.06243625  | 0.117877427 | 0.037166692 | 0.058048813  | 0.009982889  | OTX1, AC009501.4                             |
| chr17 | 7307207   | 7307701   | 495  | * | 10 | 1.0942E-07  | 0.057242438 | 0.118110937 | 0.062872599 | -0.041053158 | -0.011548206 | TMEM256-PLSCR3, C17orf61-<br>PLSCR3, TMEM256 |
| chr6  | 79787561  | 79788336  | 776  | * | 11 | 6.25856E-08 | 0.121537308 | 0.11813874  | 0.175400348 | -0.033308011 | -0.005177507 | PHIP                                         |
| chr13 | 29292888  | 29293848  | 961  | * | 12 | 2.21489E-09 | 0.008237667 | 0.118385151 | 0.020696823 | -0.038626182 | -0.002404152 | SLC46A3                                      |
| chr18 | 48555713  | 48556386  | 674  | * | 6  | 6.93328E-09 | 0.01379661  | 0.118472596 | 0.032469549 | 0.083480791  | 0.025709057  | RP11-729L2.2, SMAD4                          |
| chr19 | 19030094  | 19030860  | 767  | * | 13 | 5.74513E-10 | 0.008714266 | 0.118545881 | 0.017176959 | -0.09737292  | -0.009341391 | DDX49, COPE, AC002985.3                      |
| chr17 | 61904790  | 61905527  | 738  | * | 14 | 4.8329E-09  | 0.1910248   | 0.118546033 | 0.110325565 | 0.055694666  | 0.006179017  | PSMC5, FTSJ3                                 |
| chr21 | 35831871  | 35832364  | 494  | * | 13 | 1.4134E-09  | 0.006434242 | 0.118642506 | 0.024071104 | 0.173763626  | 0.08402464   | KCNE1                                        |
| chr7  | 16685273  | 16685823  | 551  | * | 11 | 8.54164E-09 | 0.016404616 | 0.119366269 | 0.035583301 | -0.055408418 | -0.001670759 | BZW2, ANKMY2                                 |
| chr17 | 38256932  | 38257323  | 392  | * | 10 | 8.12478E-09 | 0.011131451 | 0.119587411 | 0.023524006 | -0.05573219  | -0.010389337 | NR1D1                                        |
| chr1  | 155145555 | 155146720 | 1166 | * | 16 | 1.02395E-09 | 0.018216001 | 0.119704671 | 0.040433249 | -0.093773112 | -0.004450874 | TRIM46, KRTCAP2, RP11-201K10.3               |
| chr11 | 46402051  | 46402535  | 485  | * | 6  | 1.46352E-07 | 0.091569383 | 0.119952566 | 0.117637704 | -0.038102092 | -0.008997826 | DGKZ, MDK                                    |
| chr11 | 105947912 | 105949106 | 1195 | * | 20 | 1.95033E-10 | 0.142496932 | 0.120061592 | 0.057379494 | -0.044291329 | 0.000163939  | AASDHPPT, KBTBD3                             |
| chr1  | 114447334 | 114447798 | 465  | * | 10 | 9.52577E-09 | 0.009610526 | 0.120109604 | 0.028544671 | -0.100765862 | -0.026404237 | DCLRE1B, AP4B1                               |
| chr10 | 71332744  | 71333638  | 895  | * | 16 | 1.089E-08   | 0.136983551 | 0.120405059 | 0.145043677 | -0.031931929 | 0.00636144   | NEUROG3                                      |
| chr19 | 16770718  | 16771394  | 677  | * | 9  | 3.9306E-09  | 0.012917332 | 0.120634032 | 0.037895469 | -0.071703837 | -0.005056442 | CTC-429P9.4, SMIM7                           |
| chr20 | 35402123  | 35402523  | 401  | * | 13 | 8.84963E-08 | 0.133482785 | 0.120721831 | 0.065999347 | -0.050061916 | -0.021597531 | DSN1                                         |
| chr3  | 147126206 | 147126444 | 239  | * | 5  | 8.86249E-08 | 0.068417885 | 0.12108636  | 0.106433594 | 0.037379276  | 0.028744599  | ZIC1                                         |
| chr11 | 71935199  | 71935353  | 155  | * | 2  | 4.31935E-08 | 0.049116172 | 0.121090512 | 0.076633698 | -0.033288765 | -0.009767306 | INPPL1                                       |
| chr11 | 57282256  | 57283278  | 1023 | * | 14 | 2.0718E-10  | 0.007835175 | 0.121149992 | 0.021726088 | -0.041429696 | -0.010714445 | SLC43A1                                      |
| chr17 | 7834607   | 7836318   | 1712 | * | 19 | 4.64477E-09 | 0.065523422 | 0.121177999 | 0.073663108 | 0.04747273   | 0.004298133  | CNTROB, TRAPPC1                              |
| chr12 | 115121047 | 115122101 | 1055 | * | 8  | 1.49218E-09 | 0.021131027 | 0.121395818 | 0.063309836 | 0.023619069  | 0.004898692  | TBX3                                         |
| chr6  | 30034178  | 30035234  | 1057 | * | 19 | 7.7396E-12  | 0.005456934 | 0.121533695 | 0.016203054 | -0.048122775 | -0.014919079 | PPP1R11                                      |
| chr2  | 170550423 | 170550468 | 46   | * | 2  | 1.93249E-07 | 0.065375292 | 0.121589876 | 0.093413573 | -0.079219191 | -0.008398967 | CCDC173                                      |
| chr6  | 30640154  | 30641220  | 1067 | * | 40 | 5.17648E-10 | 0.774538205 | 0.121595424 | 0.594345206 | -0.064529188 | 0.001936973  | DHX16                                        |
| chr11 | 117747934 | 117748236 | 303  | * | 8  | 1.28996E-07 | 0.005602227 | 0.121934197 | 0.026748893 | 0.126285703  | 0.07967961   | FXD6                                         |
| chr16 | 66967867  | 66968030  | 164  | * | 2  | 1.92111E-07 | 0.093536948 | 0.121951742 | 0.117401874 | 0.019656011  | 0.006381127  | FAM96B                                       |
| chr7  | 129592601 | 129592850 | 250  | * | 3  | 1.77504E-07 | 0.264009908 | 0.12203915  | 0.219004074 | 0.010686152  | 0.003651271  | UBE2H                                        |
| chr1  | 2457999   | 2458506   | 508  | * | 16 | 2.82253E-09 | 0.072730169 | 0.122130977 | 0.044315614 | -0.067150021 | -0.013438553 | PANK4                                        |

|       |           |           |      |   |    |             |             |             |             |              |              |                                |
|-------|-----------|-----------|------|---|----|-------------|-------------|-------------|-------------|--------------|--------------|--------------------------------|
| chr1  | 18433794  | 18434118  | 325  | * | 4  | 6.88393E-08 | 0.032238623 | 0.122367873 | 0.06591658  | 0.034902735  | 0.022605032  |                                |
| chr6  | 30684736  | 30686368  | 1633 | * | 31 | 2.60385E-15 | 0.206363682 | 0.122529697 | 0.084079744 | 0.049056895  | 0.00129684   | MDC1                           |
| chr7  | 27224700  | 27226148  | 1449 | * | 28 | 1.3083E-14  | 0.053155789 | 0.122649572 | 0.044669707 | 0.107702768  | 0.034224668  | HOXA11-AS, HOXA11              |
| chr6  | 30584720  | 30585650  | 931  | * | 26 | 7.95391E-11 | 0.064333739 | 0.122842378 | 0.086736313 | -0.059270564 | -0.00048938  | MRPS18B, PPP1R10               |
| chr6  | 43138798  | 43139692  | 895  | * | 12 | 1.09252E-09 | 0.197881476 | 0.122994103 | 0.079194034 | -0.040953312 | -0.007502742 | SRF                            |
| chr2  | 225266263 | 225266656 | 394  | * | 5  | 1.58669E-07 | 0.02819917  | 0.123456116 | 0.065768518 | -0.050587664 | -0.032157159 | FAM124B                        |
| chr14 | 58764383  | 58765087  | 705  | * | 9  | 9.36992E-09 | 0.162739225 | 0.123585902 | 0.045994283 | -0.050878244 | -0.017572965 | C14orf37, RP11-349A22.5        |
| chr3  | 9834426   | 9834755   | 330  | * | 12 | 1.13723E-07 | 0.081232917 | 0.123724158 | 0.08462471  | 0.028007685  | 0.006923147  | ARPC4, TADA3                   |
| chr22 | 19435145  | 19436224  | 1080 | * | 12 | 2.56475E-09 | 0.001589073 | 0.12488915  | 0.013779673 | 0.051748234  | -0.015407648 | AC000068.5, HIRA, C22orf39     |
| chr2  | 202507362 | 202507823 | 462  | * | 11 | 1.70594E-08 | 0.033471395 | 0.12509215  | 0.080758316 | 0.025084124  | 0.005270695  | TMEM237                        |
| chr17 | 18162315  | 18162372  | 58   | * | 3  | 1.87104E-07 | 0.071463415 | 0.125095136 | 0.109613625 | 0.032132141  | 0.022164122  |                                |
| chr1  | 150336613 | 150337482 | 870  | * | 15 | 5.03465E-09 | 0.046237699 | 0.125359869 | 0.043376182 | -0.042731668 | -0.008931725 | RPRD2                          |
| chr17 | 48637104  | 48638103  | 1000 | * | 21 | 5.3153E-10  | 0.129820949 | 0.125472006 | 0.091186978 | 0.102654723  | 0.008549038  | CACNA1G-AS1                    |
| chr1  | 40782458  | 40783264  | 807  | * | 11 | 3.49624E-09 | 0.005420858 | 0.125573444 | 0.019164045 | 0.116609053  | 0.044978877  | COL9A2                         |
| chr6  | 30614632  | 30615000  | 369  | * | 10 | 1.67513E-08 | 0.071245218 | 0.125719955 | 0.092467393 | 0.033564522  | -1.46452E-06 | C6orf136                       |
| chr19 | 50528391  | 50529510  | 1120 | * | 17 | 6.84306E-10 | 0.016975601 | 0.1258033   | 0.023374207 | -0.042195819 | -0.002642245 | ZNF473, VRK3                   |
| chr7  | 99155595  | 99156469  | 875  | * | 15 | 1.85258E-09 | 0.065915631 | 0.126418923 | 0.068789001 | -0.05482989  | -0.006187936 | ZNF655, GS1-259H13.10, FAM200A |
| chr11 | 78285742  | 78286346  | 605  | * | 11 | 1.82946E-08 | 0.004136693 | 0.126460619 | 0.019973385 | -0.068762967 | -0.004350954 | NARS2                          |
| chr2  | 88354927  | 88355481  | 555  | * | 13 | 5.18532E-08 | 0.012509969 | 0.12668464  | 0.033453154 | -0.043225183 | 0.00016784   | KRCC1                          |
| chr12 | 56551390  | 56552132  | 743  | * | 15 | 2.42857E-08 | 0.048496417 | 0.126813049 | 0.055226182 | -0.056830461 | -0.012553875 | MYL6B, MYL6, RP11-603J24.14    |
| chr19 | 49140995  | 49141364  | 370  | * | 7  | 9.77152E-08 | 0.1230874   | 0.126893542 | 0.11114869  | -0.044030524 | -0.015271015 | SEC1P, CA11                    |
| chr1  | 9970042   | 9971115   | 1074 | * | 16 | 1.81077E-09 | 0.016828393 | 0.127895831 | 0.051092304 | -0.102119522 | -0.024145563 | CTNNBIP1                       |
| chr3  | 49977118  | 49977988  | 871  | * | 16 | 3.79825E-09 | 0.01652001  | 0.127980792 | 0.047548682 | 0.027675731  | 0.004397948  | RBM6                           |
| chr7  | 127983655 | 127984063 | 409  | * | 8  | 1.24245E-07 | 0.03997001  | 0.128989449 | 0.078519695 | -0.038582367 | -0.0001033   | RBM28                          |
| chr6  | 30881112  | 30882384  | 1273 | * | 38 | 2.38412E-14 | 0.36140145  | 0.12923955  | 0.16733962  | 0.101574874  | 0.01580552   | GTF2H4, VARS2                  |
| chr1  | 160231971 | 160233057 | 1087 | * | 17 | 7.84064E-09 | 0.031642586 | 0.129431615 | 0.04367656  | -0.076546798 | -0.010532761 | RP11-574F21.2, DCAF8, DCAF8    |
| chr16 | 11349372  | 11350371  | 1000 | * | 13 | 1.48523E-08 | 0.070641159 | 0.129470788 | 0.055317558 | -0.065876724 | -0.016368234 | RM12, SOCS1                    |
| chr17 | 8021572   | 8022404   | 833  | * | 14 | 1.07655E-09 | 0.034266342 | 0.129489324 | 0.03480994  | -0.026112001 | -0.001902428 | ALOXE3                         |
| chr6  | 33290408  | 33291111  | 704  | * | 24 | 1.25394E-11 | 0.23295503  | 0.129563682 | 0.116994613 | -0.106079423 | -0.019789606 | DAXX                           |

|       |           |           |      |   |    |             |             |             |             |              |              |                                          |
|-------|-----------|-----------|------|---|----|-------------|-------------|-------------|-------------|--------------|--------------|------------------------------------------|
| chr18 | 2571349   | 2572167   | 819  | * | 13 | 7.99088E-10 | 0.171214095 | 0.129580947 | 0.100835231 | -0.045059813 | 0.001779243  | NDC80, METTL4                            |
| chr15 | 64648051  | 64648224  | 174  | * | 2  | 1.86326E-07 | 0.077721135 | 0.12972332  | 0.107523441 | -0.06847561  | -0.02895056  | CSNK1G1, CTD-2116N17.1                   |
| chr20 | 25062447  | 25063170  | 724  | * | 11 | 3.55516E-09 | 0.001618318 | 0.130102628 | 0.010809505 | 0.111772966  | 0.04191779   | VSX1                                     |
| chr14 | 24024869  | 24025569  | 701  | * | 15 | 8.66304E-08 | 0.195720949 | 0.130149263 | 0.210026217 | -0.02759103  | 0.000578043  | RP11-66N24.4, THTPA, ZFHX2               |
| chr14 | 92572856  | 92573175  | 320  | * | 9  | 7.24582E-08 | 0.013626781 | 0.130492346 | 0.043301046 | 0.035835662  | 0.007590703  | ATXN3                                    |
| chr12 | 45609527  | 45610283  | 757  | * | 11 | 1.07025E-08 | 0.120699143 | 0.130557433 | 0.094400687 | -0.055525609 | -0.017133534 | ANO6, PLEKHA8P1                          |
| chr5  | 148930374 | 148931484 | 1111 | * | 17 | 1.12722E-08 | 0.087241206 | 0.130630649 | 0.090504686 | -0.04177304  | -0.003107448 | CSNK1A1                                  |
| chr11 | 111956827 | 111957872 | 1046 | * | 23 | 2.75366E-08 | 0.300806453 | 0.130713153 | 0.135811293 | -0.048212831 | -0.00051182  | SDHD, SDHD, TIMM8B                       |
| chr6  | 32862050  | 32862445  | 396  | * | 14 | 1.19521E-07 | 0.519679629 | 0.130793516 | 0.27780697  | -0.044296506 | -8.68275E-05 |                                          |
| chr3  | 134513993 | 134514472 | 480  | * | 11 | 1.5157E-08  | 0.004465998 | 0.131319874 | 0.022008664 | -0.082348813 | -0.022397224 | EPHB1                                    |
| chr6  | 30180688  | 30182518  | 1831 | * | 47 | 4.19441E-14 | 0.09917825  | 0.131723339 | 0.110923789 | 0.112095243  | 0.002545766  | TRIM26                                   |
| chr20 | 982991    | 983130    | 140  | * | 5  | 1.28765E-07 | 0.036419197 | 0.132058958 | 0.074419924 | 0.013793921  | 0.004871038  |                                          |
| chr10 | 105155729 | 105156690 | 962  | * | 21 | 8.78752E-11 | 0.070699428 | 0.132153637 | 0.049511608 | -0.062231901 | -0.008755047 | PDCD11, USMG5                            |
| chr12 | 57623725  | 57624530  | 806  | * | 12 | 2.33612E-08 | 0.031029466 | 0.132644226 | 0.033168531 | 0.076347368  | 0.01421038   | SHMT2                                    |
| chr15 | 72612125  | 72612853  | 729  | * | 14 | 1.41076E-08 | 0.023248194 | 0.133047422 | 0.058803763 | 0.040543782  | 0.005848186  | RP11-106M3.3, CELF6, CELF6, RP11-106M3.2 |
| chr22 | 18120948  | 18121431  | 484  | * | 13 | 1.03511E-07 | 0.07232874  | 0.133295203 | 0.064799963 | -0.049063891 | -0.013703801 | BCL2L13                                  |
| chr1  | 19577645  | 19578612  | 968  | * | 16 | 2.29209E-09 | 0.01292408  | 0.133325904 | 0.046115929 | -0.025348313 | 0.00162231   | MRTO4, EMC1                              |
| chr12 | 133464074 | 133465188 | 1115 | * | 28 | 1.70194E-09 | 0.437946387 | 0.133555361 | 0.25926794  | 0.126817173  | -4.23069E-05 | RP11-46H11.12, CHFR                      |
| chr1  | 23495375  | 23495393  | 19   | * | 2  | 1.67313E-07 | 0.087989406 | 0.134335434 | 0.118173396 | 0.008462847  | 0.002466949  | LUZP1                                    |
| chr6  | 33385056  | 33386556  | 1501 | * | 50 | 2.87846E-13 | 0.427217748 | 0.134660612 | 0.216894569 | 0.075664635  | 0.007711844  | CUTA                                     |
| chr11 | 506809    | 507555    | 747  | * | 16 | 4.06333E-08 | 0.163064321 | 0.134708343 | 0.155177069 | -0.041392491 | -0.008268064 | RNH1                                     |
| chr1  | 26232706  | 26232895  | 190  | * | 6  | 1.19436E-07 | 0.274939791 | 0.134778932 | 0.224814653 | -0.036498799 | -0.014744798 | STMN1, MIR3917                           |
| chr6  | 31620354  | 31621299  | 946  | * | 25 | 3.40756E-11 | 0.343876576 | 0.135309826 | 0.141072523 | -0.078528888 | -0.004619115 | APOM, BAG6                               |
| chr6  | 32163810  | 32165321  | 1512 | * | 34 | 6.01639E-14 | 0.115409852 | 0.135834432 | 0.06131549  | 0.082570338  | 0.00828511   | NOTCH4                                   |
| chr19 | 55897101  | 55897819  | 719  | * | 13 | 1.43355E-08 | 0.067473941 | 0.1361054   | 0.086120832 | 0.025538146  | -0.002986303 | RPL28                                    |
| chr10 | 25464059  | 25464719  | 661  | * | 12 | 1.23248E-09 | 0.003169675 | 0.136199013 | 0.024894085 | 0.051418106  | 0.015514805  | GPR158, GPR158-AS1                       |
| chr3  | 157823708 | 157824217 | 510  | * | 9  | 7.00193E-08 | 0.262006058 | 0.137258959 | 0.12807416  | 0.052984008  | 0.016612005  | RSRC1, SHOX2                             |
| chr1  | 155107785 | 155108588 | 804  | * | 12 | 6.69267E-09 | 0.070053882 | 0.137884431 | 0.03874821  | -0.065549345 | -0.030433415 | SLC50A1                                  |
| chr6  | 33265886  | 33267886  | 2001 | * | 53 | 2.94609E-12 | 0.842772932 | 0.138494963 | 0.546161634 | -0.141868505 | -0.003558181 | PFDN6, RGL2, TAPBP                       |

|       |           |           |      |   |    |             |             |             |             |              |              |                         |
|-------|-----------|-----------|------|---|----|-------------|-------------|-------------|-------------|--------------|--------------|-------------------------|
| chr2  | 264695    | 265084    | 390  | * | 11 | 2.14576E-08 | 0.038719206 | 0.138839926 | 0.07908986  | -0.02661838  | -0.004282029 | ACP1, SH3YL1            |
| chr15 | 69706318  | 69706619  | 302  | * | 8  | 7.66868E-08 | 0.144071278 | 0.140092918 | 0.119610636 | 0.083900836  | 0.017707174  | KIF23, RP11-253M7.1     |
| chr17 | 42263806  | 42264871  | 1066 | * | 19 | 3.51E-09    | 0.102931273 | 0.140161756 | 0.108976317 | -0.03706444  | 0.001508787  | TMUB2, ASB16-AS1        |
| chr1  | 53067637  | 53068579  | 943  | * | 10 | 5.14212E-09 | 0.058431913 | 0.140649203 | 0.082457956 | -0.055938645 | 0.003078747  | GPX7                    |
| chr17 | 6543784   | 6544486   | 703  | * | 14 | 5.48399E-09 | 0.122344538 | 0.140695164 | 0.089472113 | -0.053613902 | -0.002078924 | TXNDC17, KIAA0753       |
| chr3  | 37033980  | 37035399  | 1420 | * | 35 | 5.9411E-12  | 0.243946191 | 0.141216624 | 0.258931702 | -0.072549027 | -0.004374619 | MLH1, EPM2AIP1          |
| chr3  | 129158884 | 129159190 | 307  | * | 10 | 9.61205E-08 | 0.114575202 | 0.141461989 | 0.080878487 | -0.041774893 | -0.005582764 | IFT122                  |
| chr11 | 63438791  | 63439440  | 650  | * | 14 | 1.89341E-08 | 0.03919686  | 0.141592399 | 0.06979716  | 0.016930787  | 0.001022803  | ATL3                    |
| chr15 | 74219307  | 74219948  | 642  | * | 4  | 2.64667E-08 | 0.124876405 | 0.141963915 | 0.10186879  | -0.025151632 | -0.001329397 | LOXL1, LOXL1-AS1        |
| chr20 | 42142005  | 42143211  | 1207 | * | 25 | 1.07941E-10 | 0.513247698 | 0.142145762 | 0.203376577 | -0.115885831 | -0.037866015 | L3MBTL1                 |
| chr12 | 45269992  | 45270476  | 485  | * | 10 | 4.664E-09   | 0.022985762 | 0.142719086 | 0.032401882 | 0.024483503  | 0.009411997  | NELL2                   |
| chr17 | 46655164  | 46656093  | 930  | * | 18 | 1.78606E-08 | 0.064943155 | 0.142726931 | 0.084598045 | -0.055142706 | 0.001415284  | HOXB-AS3, HOXB3, HOXB4  |
| chr1  | 149900628 | 149900705 | 78   | * | 3  | 1.25674E-07 | 0.047002093 | 0.143076373 | 0.089591844 | 0.090918258  | 0.06047276   | MTMR11                  |
| chr20 | 49126382  | 49126905  | 524  | * | 11 | 8.7097E-08  | 0.1510693   | 0.14384541  | 0.11061255  | 0.063594623  | 0.001252749  | PTPN1                   |
| chr19 | 52643011  | 52643487  | 477  | * | 10 | 4.98039E-08 | 0.002991059 | 0.144167625 | 0.021394552 | -0.045571373 | -0.010069832 | ZNF616, CTC-471J1.8     |
| chr2  | 25142101  | 25142523  | 423  | * | 6  | 8.80287E-08 | 0.095082448 | 0.144354687 | 0.086275413 | 0.058441654  | 0.010823346  | ADCY3                   |
| chr1  | 11865920  | 11866529  | 610  | * | 15 | 3.73446E-08 | 0.140613303 | 0.144447674 | 0.161470736 | -0.045761932 | -0.00982829  | CLCN6, MTHFR            |
| chr20 | 36147549  | 36149750  | 2202 | * | 42 | 4.71942E-16 | 0.163144168 | 0.145188255 | 0.083972744 | -0.10131827  | -0.030423896 | NNAT, BLCAP             |
| chr4  | 85402397  | 85402870  | 474  | * | 3  | 1.15048E-07 | 0.04486806  | 0.145241454 | 0.086227872 | 0.034765268  | 0.02390704   |                         |
| chr17 | 61920084  | 61920732  | 649  | * | 10 | 1.04182E-07 | 0.167226185 | 0.145253671 | 0.095229523 | -0.036889653 | -0.011616136 | SMARCD2                 |
| chr19 | 4769001   | 4769688   | 688  | * | 13 | 4.64355E-08 | 0.016328435 | 0.146086183 | 0.049959898 | 0.124181713  | 0.037982236  | MIR7-3HG                |
| chr11 | 47270041  | 47270344  | 304  | * | 7  | 1.31248E-07 | 0.152925032 | 0.146700491 | 0.119586392 | -0.04799838  | -0.003402615 | NR1H3, ACP2             |
| chr1  | 173684086 | 173684474 | 389  | * | 3  | 7.77282E-08 | 0.075821562 | 0.147807172 | 0.117309866 | -0.06443943  | -0.02343313  | KLHL20                  |
| chr6  | 2764512   | 2765204   | 693  | * | 9  | 2.73146E-08 | 0.006564184 | 0.148454597 | 0.035022659 | 0.079634723  | 0.002852028  |                         |
| chr3  | 197518634 | 197518711 | 78   | * | 2  | 1.82513E-07 | 0.123605559 | 0.149290153 | 0.152525354 | -0.035407442 | -0.010379338 | LRCH3                   |
| chr10 | 30722981  | 30723526  | 546  | * | 6  | 7.39601E-08 | 0.266973921 | 0.149892554 | 0.150903449 | -0.007383537 | -0.002568134 | MAP3K8                  |
| chr8  | 95565682  | 95566223  | 542  | * | 9  | 5.31799E-08 | 0.019720621 | 0.149944643 | 0.049511776 | -0.023035832 | 0.002650129  | RP11-267M23.4, KIAA1429 |
| chr9  | 127630689 | 127630854 | 166  | * | 2  | 1.11213E-07 | 0.072224871 | 0.150071188 | 0.10878149  | -0.06055883  | -0.025666114 | ARPC5L                  |
| chr11 | 2421572   | 2422730   | 1159 | * | 26 | 5.9762E-10  | 0.246629941 | 0.150217722 | 0.142745569 | -0.065217338 | -0.000494801 | TSSC4                   |

|       |           |           |      |   |    |             |             |             |             |              |              |                              |
|-------|-----------|-----------|------|---|----|-------------|-------------|-------------|-------------|--------------|--------------|------------------------------|
| chr6  | 33167661  | 33169106  | 1446 | * | 31 | 3.91488E-10 | 0.505687015 | 0.150309174 | 0.361950915 | -0.062768386 | -0.003019555 | SLC39A7, RXRB                |
| chr19 | 11546103  | 11547126  | 1024 | * | 20 | 3.86484E-09 | 0.936379391 | 0.152799292 | 0.558746809 | 0.042232497  | 0.002684463  | PRKCSH, CCDC151              |
| chr4  | 84457116  | 84457579  | 464  | * | 14 | 5.0826E-08  | 0.094337632 | 0.153142188 | 0.150800857 | -0.025869127 | 0.006627033  | AGPAT9                       |
| chr16 | 55689477  | 55689534  | 58   | * | 3  | 2.09837E-07 | 0.041980627 | 0.154060604 | 0.086086096 | 0.094427104  | 0.066133062  | SLC6A2                       |
| chr11 | 2906667   | 2908116   | 1450 | * | 29 | 2.43722E-11 | 0.036658527 | 0.154278381 | 0.055174645 | 0.133006461  | 0.006451012  | CDKN1C                       |
| chr11 | 28129499  | 28130018  | 520  | * | 15 | 3.91478E-09 | 0.003884896 | 0.155950245 | 0.026704998 | -0.04807015  | 0.001747133  | METTL15, KIF18A              |
| chr13 | 48877957  | 48878466  | 510  | * | 3  | 7.29955E-08 | 0.453623453 | 0.15631383  | 0.194986207 | -0.042664723 | -0.026650894 | RB1                          |
| chr1  | 43638094  | 43638119  | 26   | * | 2  | 1.72807E-07 | 0.12173732  | 0.156872036 | 0.154821267 | -0.03104706  | -0.022424098 | WDR65, EBNA1BP2              |
| chr1  | 151694320 | 151694582 | 263  | * | 4  | 1.19139E-07 | 0.023915358 | 0.157147408 | 0.066177011 | 0.069623158  | 0.04991422   | AL589765.1, RIIAD1           |
| chr3  | 47323804  | 47325421  | 1618 | * | 22 | 4.69574E-10 | 0.003326985 | 0.157652826 | 0.023199896 | 0.105561627  | -0.007140909 | KLHL18, KIF9                 |
| chr12 | 48690974  | 48691036  | 63   | * | 2  | 1.37823E-07 | 0.081820582 | 0.1589078   | 0.121109035 | 0.075254773  | 0.063792291  |                              |
| chr13 | 78492916  | 78493878  | 963  | * | 31 | 3.06578E-10 | 0.331157777 | 0.160444815 | 0.277712979 | -0.04612181  | -0.000966032 | RNF219-AS1, EDNRB            |
| chr7  | 151722222 | 151722814 | 593  | * | 12 | 4.34969E-08 | 0.007750543 | 0.161741614 | 0.044049444 | 0.090031328  | 0.017783941  | GALNT11                      |
| chr6  | 33421704  | 33423122  | 1419 | * | 38 | 5.5106E-14  | 0.142594846 | 0.163351984 | 0.155463762 | 0.101204435  | 0.00454309   | ZBTB9                        |
| chr4  | 114681840 | 114681880 | 41   | * | 2  | 6.9542E-08  | 0.306165142 | 0.163472675 | 0.248532769 | -0.029285503 | -0.016927756 | CAMK2D                       |
| chr17 | 72919480  | 72919704  | 225  | * | 4  | 9.31664E-09 | 0.037987878 | 0.168672385 | 0.091224175 | 0.026563293  | 0.01717289   |                              |
| chr11 | 61583560  | 61584116  | 557  | * | 12 | 7.14527E-08 | 0.083225782 | 0.169396215 | 0.127195863 | -0.101191405 | -0.014056419 | FADS2, FADS1                 |
| chr7  | 116593263 | 116594199 | 937  | * | 14 | 2.4606E-09  | 0.007102763 | 0.171397601 | 0.049351823 | -0.043233367 | -0.011724233 | ST7, ST7-OT4, ST7-AS1        |
| chr12 | 123459241 | 123459749 | 509  | * | 11 | 3.68336E-08 | 0.565073249 | 0.171970738 | 0.291503179 | -0.018846715 | -0.003055796 | OGFOD2, ABCB9                |
| chr15 | 74284600  | 74284603  | 4    | * | 2  | 2.01668E-07 | 0.125071307 | 0.172288545 | 0.164475857 | 0.012002965  | 0.009324772  | STOML1                       |
| chr17 | 79935490  | 79935872  | 383  | * | 4  | 4.54408E-08 | 0.311262867 | 0.173233127 | 0.259767338 | 0.007035079  | 0.000331893  | ASPSCR1                      |
| chr6  | 32063874  | 32064810  | 937  | * | 28 | 1.52018E-10 | 0.215935052 | 0.17431316  | 0.255596703 | -0.14927709  | -0.056933782 | TNXB                         |
| chr2  | 44588434  | 44589279  | 846  | * | 16 | 5.20228E-08 | 0.050856893 | 0.175392177 | 0.105850945 | -0.027110594 | -0.008536468 | CAMKMT, PREPL                |
| chr6  | 128841761 | 128841771 | 11   | * | 2  | 2.11737E-07 | 0.094032202 | 0.175976897 | 0.13858043  | 0.012571518  | 0.001837638  | PTPRK                        |
| chr11 | 64889310  | 64889881  | 572  | * | 14 | 6.26571E-08 | 0.286740328 | 0.178033638 | 0.183643944 | 0.017016161  | 0.003989082  | MRPL49, FAU, SYVN1           |
| chr15 | 89010209  | 89010921  | 713  | * | 17 | 1.37903E-09 | 0.002294981 | 0.179271554 | 0.030113704 | -0.041349757 | -0.008004053 | MRPS11, MRPL46, RP11-97O12.7 |
| chr1  | 183605108 | 183605490 | 383  | * | 12 | 9.82312E-08 | 0.037408258 | 0.180419538 | 0.081036605 | -0.052028229 | -0.01967688  | RGL1                         |
| chr6  | 30028257  | 30029370  | 1114 | * | 31 | 3.97994E-11 | 0.252657521 | 0.180619139 | 0.247021064 | -0.044969028 | -0.004387738 | ZNRD1, ZNRD1-AS1             |
| chr20 | 61447442  | 61448534  | 1093 | * | 27 | 4.279E-11   | 0.021971159 | 0.182440512 | 0.066405097 | 0.059612191  | 0.011334103  | COL9A3                       |



|       |           |           |      |   |    |             |             |             |             |              |              |                     |
|-------|-----------|-----------|------|---|----|-------------|-------------|-------------|-------------|--------------|--------------|---------------------|
| chr11 | 2890258   | 2891495   | 1238 | * | 30 | 2.57631E-13 | 0.163694221 | 0.187945105 | 0.10262147  | 0.144220942  | 0.049425682  | KCNQ1DN             |
| chr7  | 11013361  | 11013816  | 456  | * | 10 | 1.08306E-07 | 0.05725905  | 0.189855462 | 0.124768507 | -0.025679188 | -0.000477882 | PHF14               |
| chr17 | 77770879  | 77771036  | 158  | * | 2  | 1.42856E-07 | 0.303462979 | 0.194392238 | 0.275934363 | -0.01075811  | -0.003217863 | CBX8                |
| chr2  | 201980638 | 201981146 | 509  | * | 13 | 9.88707E-08 | 0.048098386 | 0.194964916 | 0.119932365 | -0.052777995 | -0.021404336 | CFLAR               |
| chr1  | 3447729   | 3447740   | 12   | * | 2  | 1.85663E-07 | 0.290811494 | 0.195084492 | 0.271754811 | 0.015187103  | 0.009929084  | MEGF6               |
| chr4  | 2470786   | 2471043   | 258  | * | 6  | 9.29762E-08 | 0.230729922 | 0.1956801   | 0.237127608 | -0.07544477  | -0.027488361 | RNF4                |
| chr7  | 143012820 | 143012960 | 141  | * | 2  | 5.39979E-08 | 0.432223319 | 0.197557119 | 0.315200369 | -0.020765419 | -0.01186308  |                     |
| chr7  | 94284629  | 94287242  | 2614 | * | 73 | 2.8292E-11  | 0.110937093 | 0.197815661 | 0.288828966 | -0.120030954 | -0.020549613 | PEG10, SGCE         |
| chr17 | 17398264  | 17398771  | 508  | * | 2  | 1.15921E-07 | 0.15366277  | 0.20059205  | 0.199867907 | 0.038567252  | 0.037864331  | RASD1               |
| chr7  | 87229552  | 87229722  | 171  | * | 3  | 1.44841E-07 | 0.078901    | 0.200993557 | 0.147493762 | 0.023706095  | 0.018199522  | ABCB1               |
| chr5  | 122759147 | 122759164 | 18   | * | 2  | 2.14504E-07 | 0.297778241 | 0.20433521  | 0.282229903 | -0.005135048 | -0.003553856 | CEP120              |
| chr1  | 52343884  | 52344471  | 588  | * | 10 | 2.29336E-08 | 0.038955355 | 0.207748841 | 0.125752256 | -0.028901097 | -0.006931155 | NRD1                |
| chr8  | 30890632  | 30891583  | 952  | * | 15 | 5.88765E-09 | 0.21056063  | 0.210277522 | 0.273956824 | -0.043595153 | -0.004558705 | WRN, PURG           |
| chr5  | 50679147  | 50679290  | 144  | * | 4  | 1.27991E-07 | 0.178895126 | 0.212824535 | 0.267696742 | 0.02789422   | 0.005351449  | ISL1, CTD-2314G24.2 |
| chr12 | 72057638  | 72057807  | 170  | * | 9  | 1.80414E-07 | 0.164932293 | 0.214447018 | 0.245493215 | -0.081319795 | -0.01900428  | THAP2, ZFC3H1       |
| chr10 | 92979413  | 92979600  | 188  | * | 2  | 3.62814E-08 | 0.832575385 | 0.214831957 | 0.373902365 | 0.047847625  | 0.023705357  |                     |
| chr17 | 1956958   | 1958235   | 1278 | * | 42 | 1.53759E-11 | 0.181484951 | 0.217832979 | 0.255083829 | -0.086862116 | -0.002885466 | HIC1                |
| chr3  | 9791984   | 9792140   | 157  | * | 2  | 1.20063E-07 | 0.312672346 | 0.224052505 | 0.304468614 | 0.010350079  | 0.00688838   | OGG1                |
| chr6  | 31650735  | 31651158  | 424  | * | 13 | 2.26881E-08 | 0.087766769 | 0.22504178  | 0.133863016 | -0.128554584 | -0.081316349 | LY6G5C              |
| chr6  | 80656888  | 80656973  | 86   | * | 2  | 1.60304E-07 | 0.391904131 | 0.226596615 | 0.334403005 | 0.007486377  | 0.002832558  | ELOVL4              |
| chr15 | 60884119  | 60884637  | 519  | * | 4  | 5.55862E-08 | 0.376925807 | 0.241156847 | 0.300192484 | 0.027136086  | 0.009359468  | RP11-219B17.1, RORA |
| chr1  | 54518349  | 54518906  | 558  | * | 5  | 3.1361E-08  | 0.219213442 | 0.246793619 | 0.304066504 | -0.031590901 | -0.004656062 | TMEM59              |
| chr8  | 11560851  | 11561283  | 433  | * | 2  | 7.94832E-08 | 0.638428965 | 0.256980864 | 0.414698484 | 0.036980673  | 0.017550351  | GATA4               |
| chr16 | 22217447  | 22218046  | 600  | * | 6  | 9.26673E-08 | 0.532280963 | 0.257636212 | 0.47496555  | 0.017568162  | 0.002536631  | EEF2K               |
| chr21 | 27107628  | 27107814  | 187  | * | 5  | 1.11105E-07 | 0.603156769 | 0.2578845   | 0.522534565 | -0.043720062 | -0.004982861 | GABPA, ATP5J        |
| chr1  | 41445105  | 41445556  | 452  | * | 6  | 9.07056E-09 | 0.52514084  | 0.258117455 | 0.579717884 | 0.013745855  | 0.006113687  | CTPS1               |
| chr2  | 46843544  | 46844136  | 593  | * | 4  | 2.80521E-08 | 0.279442255 | 0.258410356 | 0.333685629 | -0.041402795 | -0.008663915 | CRIP1, PIGF         |
| chr6  | 101847318 | 101847349 | 32   | * | 2  | 2.00785E-07 | 0.185159397 | 0.26011238  | 0.252791521 | 0.036126717  | 0.033806713  | GRIK2               |
| chr1  | 35324844  | 35325189  | 346  | * | 3  | 1.37709E-07 | 0.722995874 | 0.266854315 | 0.519568461 | 0.016998515  | 0.002421319  | SMIM12              |

|       |           |           |     |   |   |             |             |             |             |              |              |                       |
|-------|-----------|-----------|-----|---|---|-------------|-------------|-------------|-------------|--------------|--------------|-----------------------|
| chr1  | 3688916   | 3688921   | 6   | * | 2 | 1.64822E-07 | 0.193073538 | 0.268012411 | 0.262866562 | -0.007509352 | -0.006590526 |                       |
| chr5  | 147162432 | 147162461 | 30  | * | 2 | 1.88924E-07 | 0.19527611  | 0.271492908 | 0.26627908  | 0.028999423  | 0.017938127  |                       |
| chr11 | 60680165  | 60680515  | 351 | * | 2 | 4.00439E-08 | 0.334666865 | 0.281471682 | 0.358884881 | 0.055830838  | 0.014276638  |                       |
| chr16 | 2198949   | 2199120   | 172 | * | 2 | 1.22738E-07 | 0.24554329  | 0.28281715  | 0.3091465   | 0.013578927  | 0.009727567  | RAB26                 |
| chr4  | 2243925   | 2243942   | 18  | * | 2 | 1.82787E-07 | 0.261575226 | 0.28838257  | 0.322962126 | -0.039365768 | -0.025117467 |                       |
| chr22 | 18507401  | 18507404  | 4   | * | 2 | 1.88646E-07 | 0.255272796 | 0.289080104 | 0.319256375 | -0.021095319 | -0.020456771 |                       |
| chr22 | 26875858  | 26876075  | 218 | * | 2 | 8.16108E-08 | 0.412976343 | 0.299561241 | 0.406364231 | -0.028542729 | -0.022601263 | HPS4                  |
| chr20 | 57225100  | 57225195  | 96  | * | 2 | 9.0373E-08  | 0.284300649 | 0.304665825 | 0.347207945 | 0.039556392  | 0.023575669  |                       |
| chr15 | 25684578  | 25684818  | 241 | * | 4 | 1.89978E-07 | 0.224866196 | 0.312087766 | 0.358865365 | -0.04225885  | -0.015326112 |                       |
| chr8  | 98656243  | 98656671  | 429 | * | 8 | 1.06558E-07 | 0.195808073 | 0.316211179 | 0.398784886 | -0.062675717 | -0.025439484 | MTDH                  |
| chr17 | 48797139  | 48797403  | 265 | * | 2 | 1.74103E-07 | 0.315420473 | 0.341430341 | 0.389235053 | -0.021647004 | -0.007097205 | LUC7L3                |
| chr2  | 10442879  | 10443138  | 260 | * | 4 | 1.00824E-07 | 0.600396048 | 0.352330928 | 0.580661616 | -0.017969165 | -0.008138237 | HPCAL1                |
| chr6  | 33377795  | 33378130  | 336 | * | 7 | 1.58192E-07 | 0.696980425 | 0.369988388 | 0.681228276 | -0.043361524 | 0.000285004  |                       |
| chr12 | 56545925  | 56546207  | 283 | * | 6 | 1.84814E-07 | 0.711371235 | 0.376155861 | 0.729862307 | -0.031175405 | -0.010119742 | MYL6B, RP11-603J24.14 |
| chr6  | 32048632  | 32049053  | 422 | * | 3 | 3.9696E-08  | 0.372163499 | 0.421593143 | 0.524367629 | 0.046276765  | 0.042020025  | TNXB                  |
| chr17 | 76227508  | 76227681  | 174 | * | 2 | 7.98735E-08 | 0.412666308 | 0.437934812 | 0.508546424 | 0.041630461  | 0.036972349  | TMEM235               |
| chr8  | 41347837  | 41348205  | 369 | * | 2 | 9.02455E-08 | 0.846315649 | 0.442438776 | 0.635845817 | -0.012098062 | -0.00755966  | GOLGA7                |
| chr1  | 7622519   | 7622560   | 42  | * | 2 | 1.52929E-07 | 0.781492959 | 0.471528891 | 0.656953247 | 0.01777275   | 0.010279266  | CAMTA1                |
| chr1  | 204485540 | 204485559 | 20  | * | 2 | 1.87399E-07 | 0.46756798  | 0.473551028 | 0.56206555  | 0.010712004  | 0.003978101  | MDM4                  |
| chr1  | 38156178  | 38156235  | 58  | * | 4 | 1.8699E-07  | 0.875801128 | 0.494997872 | 0.81169718  | 0.02416294   | 0.003446001  | C1orf109              |
| chr5  | 134872029 | 134872124 | 96  | * | 3 | 1.80859E-07 | 0.843895422 | 0.498463606 | 0.720269913 | -0.041535686 | -0.005829581 |                       |
| chr12 | 50222430  | 50222472  | 43  | * | 3 | 2.11683E-07 | 0.711183454 | 0.498682554 | 0.723211729 | -0.008540616 | -0.001447516 | BCDIN3D-AS1, NCKAP5L  |
| chr16 | 89044523  | 89044646  | 124 | * | 2 | 6.67907E-08 | 0.887533886 | 0.80282184  | 0.92790144  | -0.020572505 | -0.018786831 |                       |
| chr1  | 154975574 | 154975779 | 206 | * | 2 | 1.27221E-07 | 0.968394141 | 0.867687253 | 0.968795882 | 0.003879233  | 0.001874176  | ZBTB7B                |
