# Supplementary material for: A Sight of the Diagnostic Value of Aberrant Cell-Free DNA Methylation in Lung Cancer
Source: Hindawi journal article supplement (doi:10.1155/2022/9619357), 2022-01-27
Supplement: f6 [file 9619357.f6.pdf]

**Table S3. GO analysis of DMGs in cfDNA samples**

| ONTOLOGY           | ID         | Description                                             | GeneRatio | BgRatio   | pvalue   | p.adjust | qvalue   | Count | geneID                                                                                                                                                                                                                                                                                                                                                                                                                                                                                                                                                                                                                                                                                                                                                                                    |
|--------------------|------------|---------------------------------------------------------|-----------|-----------|----------|----------|----------|-------|-------------------------------------------------------------------------------------------------------------------------------------------------------------------------------------------------------------------------------------------------------------------------------------------------------------------------------------------------------------------------------------------------------------------------------------------------------------------------------------------------------------------------------------------------------------------------------------------------------------------------------------------------------------------------------------------------------------------------------------------------------------------------------------------|
| Biological Process | GO:0002283 | neutrophil activation involved in immune response       | 127/2279  | 490/18866 | 1.61E-17 | 1.19E-13 | 1.08E-13 | 127   | MS4A3/DEFA4/AZU1/ELANE/LRG1/S100P/SLPI/TRPM2/CTS2/PRTN3/S100A8/CTSG/VAT1/CDA/TIMP2/ABR/MPO/AMPD3/SERPINA1/PLAU/SLC2A5/KCNAB2/OLR1/GSN/C3AR1/LCN2/TOLLIP/RNASE3/UBR4/HEXB/CRISPLD2/CHI3L1/LPCAT1/GALNS/SIRPB1/CD55/TMEM30A/CD177/SLC11A1/CLEC4C/TNFRSF1B/DOK3/RAP1B/CEACAM6/RAB5C/RHOG/RAB5B/TSPAN14/PLD1/RAB31/FGR/COTL1/ORMDL3/FOLR3/DYNC1H1/FPR2/FPR1/ATP8A1/MNDA/MGAM/CLEC5A/PADI2/CTSD/HLA-C/JUP/CHIT1/BRI3/PKP1/SLC15A4/RHOF/ATP11A/CTSH/TUBB4B/RAB27A/PTPN6/TNFAIP6/CPNE1/PGAM1/PTPRN2/PTPRJ/HBB/FCN1/CD59/PGLYRP1/CREG1/OLFM4/PTPRC/CAB39/XCR1/GRN/BCR/LAIR1/CTS2/CAT/PNP/ITGB2/PDXK/ATP8B4/ARSB/DNASE1L3/PKM/PSMB7/P2RX1/PRAM1/LTF/CD68/ANO6/SPTAN1/DOCK2/CYFIP1/CD33/GMFG/PSMD13/CDK13/IMPDPH1/DBNL/SVIP/CEACAM3/ADGRG3/ARHGAP45/STING1/IRAG2/ATP6V0C/ACP3/VPS35L/ADGRE3/CRACR2A |
| Biological Process | GO:0043312 | neutrophil degranulation                                | 126/2279  | 487/18866 | 2.51E-17 | 1.19E-13 | 1.08E-13 | 126   | MS4A3/DEFA4/AZU1/ELANE/LRG1/S100P/SLPI/TRPM2/CTS2/PRTN3/S100A8/CTSG/VAT1/CDA/TIMP2/ABR/MPO/AMPD3/SERPINA1/PLAU/SLC2A5/KCNAB2/OLR1/GSN/C3AR1/LCN2/TOLLIP/RNASE3/UBR4/HEXB/CRISPLD2/CHI3L1/LPCAT1/GALNS/SIRPB1/CD55/TMEM30A/CD177/SLC11A1/CLEC4C/TNFRSF1B/DOK3/RAP1B/CEACAM6/RAB5C/RHOG/RAB5B/TSPAN14/PLD1/RAB31/FGR/COTL1/ORMDL3/FOLR3/DYNC1H1/FPR2/FPR1/ATP8A1/MNDA/MGAM/CLEC5A/PADI2/CTSD/HLA-C/JUP/CHIT1/BRI3/PKP1/SLC15A4/RHOF/ATP11A/CTSH/TUBB4B/RAB27A/PTPN6/TNFAIP6/CPNE1/PGAM1/PTPRN2/PTPRJ/HBB/FCN1/CD59/PGLYRP1/CREG1/OLFM4/PTPRC/CAB39/XCR1/GRN/BCR/LAIR1/CTS2/CAT/PNP/ITGB2/PDXK/ATP8B4/ARSB/PKM/PSMB7/P2RX1/PRAM1/LTF/CD68/ANO6/SPTAN1/DOCK2/CYFIP1/CD33/GMFG/PSMD13/CDK13/IMPDPH1/DBNL/SVIP/CEACAM3/ADGRG3/ARHGAP45/STING1/IRAG2/ATP6V0C/ACP3/VPS35L/ADGRE3/CRACR2A          |
| Biological Process | GO:0007015 | actin filament organization                             | 98/2279   | 434/18866 | 4.31E-10 | 1.36E-06 | 1.23E-06 | 98    | VILL/ARHGEF10/TRIM27/TACSTD2/GAS7/SSH1/GSN/TTN/KANK1/ELMO1/RHOH/SHROOM3/PSTPIP1/ITGB1BP1/MSRB1/PIK3R1/RHOG/SMAD3/ARRB1/WIPF1/CTTN/COTL1/CAPG/CYFIP2/MICAL1/NCK2/MSRB2/SH3PXD2B/MICAL2/WHAMM/MICAL3/ARAP1/BAIAP2L1/CUL3/CDC42EP1/BIN1/RHOF/BAIAP2/SYNPO2L/ACTN1/CORO7/ACTN4/SSH3/PREX1/PXN/WNT11/ITGB5/PPFIA1/WASL/FER/RHOBTB2/TMOD3/SVIL/MYO5A/PFN1/ESPN/CSF3/GMFB/GHRL/ACTG1/WDR1/SPTA1/ARHGAP25/PRKC1/CASS4/MIR138-2/NCKAP1/ADD1/SAMD14/ARHGEF10L/BCL2/ARHGEF18/CORO1C/AVIL/PRKCE/FLII/ARHGAP17/ARHGEF2/MYO1C/FCN3/ARHGEF15/SPTAN1/SHROOM1/TMOD1/ARHGAP12/CYFIP1/GMFG/EZR/BAIAP2L2/MYADM/SPTBN4/SYNPO/DBNL/PLEKHG2/RFLNA/CATIP/PRKN/CYRIB                                                                                                                                               |
| Biological Process | GO:0010256 | endomembrane system organization                        | 102/2279  | 468/18866 | 1.50E-09 | 3.56E-06 | 3.22E-06 | 102   | DCTN1/SH3TC2/STX5/GSN/ACRBP/VTI1A/TANGO2/CSNK1D/CREB1/RAB2A/SYNE1/LYST/CRB1/NDRG1/RAB5B/PRKCA/ARHGEF7/DNM2/ANXA6/MYO18A/LMAN2/WHAMM/RTN4/ANO7/PACSIN2/BAIAP2L1/BIN1/MYH9/FAM174B/BAIAP2/RAB27A/SNX3/ATP8B1/RTN3/ZNF385A/CLU/MIA3/ASAP1/WASL/COG1/PRKCB/MYO5A/NUP93/EPB41L3/RAB43/VPS18/PDE4DIP/MTSS1/HTT/PTPRC/ABCA1/VCPPIP1/HOOK2/NUMA1/USP6NL/PPP2R1A/SPTA1/GORASP2/DNM1/ATP8B4/MIR138-2/NEK6/PI4K2A/YWHAZ/MICALL1/CORO1C/COL5A1/VMP1/FA2H/UBXN2A/F2R/RAB30/FER1L6/TOR1B/TMED2/ANO6/DYSF/ATL1/ANK2/AP3D1/ESYT1/NDEL1/FER1L4/ANKLE2/KIFC3/LPIN1/BAIAP2L2/FLOT1/CASQ1/BAG5/BANF1/DTNBP1/SYPL2/MVB12A/VPS51/SEC31A/PHETA1/GRAMD2A/PRKN/MFSD14A/ARMH3/DOP1B                                                                                                                                 |
| Biological Process | GO:0030099 | myeloid cell differentiation                            | 95/2279   | 431/18866 | 2.99E-09 | 5.69E-06 | 5.15E-06 | 95    | MAEA/CEBPE/PRTN3/KLF1/ZFPM1/IRF8/FOXP1/SBNO2/PPARG/PIK3CD/CREB1/MIR145/RUNX1/CSF3R/INPP5D/TRIM10/FLI1/ASH2L/PIK3R1/ITPKB/TNRC6B/GAB2/PABPC4/PRKCA/TNF/UBASH3B/CSF1R/AGO1/HIPK2/CLEC5A/CBFA2T3/ZBTB16/SLC11A2/TGFB2/TESC/THBS1/MYH9/BRD1/DLL1/PIP4K2A/RIPK1/ACTN1/APP/RBP1/ITGA2B/PTPN6/ZNF385A/HDAC1/MTURN/TGFB1/CD101/TMOD3/PRKCB/KMT2D/RARA/TMEM178A/LILRB4/NF1/LRRK1/SP3/CSF3/RARG/ALAS1/TMEM64/SFXN1/SETD1A/MEIS2/WDR1/CREBBP/LRRC17/TET2/ETS1/HOXA9/ADD1/RB1/MEIS1/MEF2C/EPAS1/TSPAN2/OSTM1/LTF/CEBPB/TRIB1/FAM20C/EPB42/KAT7/INHBA/ERCC2/LIF/HOXB7/FADD/MB/TMEM14C/H3C1/CCN4                                                                                                                                                                                                        |
| Biological Process | GO:0043547 | positive regulation of GTPase activity                  | 88/2279   | 406/18866 | 2.61E-08 | 4.14E-05 | 3.74E-05 | 88    | PRTN3/ARHGEF10/TBCD/ABR/SMAP2/RIN2/DENND1A/MYO9B/ARHGDI/DOCK1/ADAP1/TBC1D16/ARHGAP26/RHOG/ACAP2/TBC1D2/ARRB1/ARHGEF7/SEC23B/CCL5/TBC1D10A/ARHGAP31/RASAL2/RIN3/AGAP1/ARAP1/GIT1/RGS6/RASA3/PREX1/VPS9D1/WNT11/DOCK8/ASAP1/RALBP1/SYNGAP1/RGS12/RABGAP1L/SEMA4D/RAPGEF2/IQSEC1/TBC1D22B/NF1/RGS17/ASAP2/CCL20/SRGAP1/USP6NL/BCR/SIPA1L1/PLCB1/SNX18/ARHGAP25/TBC1D14/DOCK10/SIPA1L2/NTRK1/RGS3/ARHGEF10L/GARNL3/TBC1D2B/SGSM2/CORO1C/DNM1L/TBC1D1/ARHGAP17/F2R/ARHGAP15/RGS10/BCAR3/TSC2/RSU1/ARHGEF15/CHN2/ARHGAP1/ARHGAP8/DOCK2/RGL3/ARHGAP12/ARHGAP10/NDEL1/RAP1GAP2/CCL22/TBC1D22A/VAV3/ARHGAP23/NPRL2/ARHGAP45                                                                                                                                                                        |
| Biological Process | GO:0043087 | regulation of GTPase activity                           | 99/2279   | 481/18866 | 5.55E-08 | 7.53E-05 | 6.81E-05 | 99    | PRTN3/ARHGEF10/TBCD/PLXNC1/ABR/SMAP2/FGD4/RHOH/RIN2/DENND1A/MYO9B/ARHGDI/DOCK1/ADAP1/ITGB1BP1/TBC1D16/ARHGAP26/RHOG/ACAP2/TBC1D2/ARRB1/ARHGEF7/SEC23B/CCL5/TBC1D10A/EPHB3/FGD5/ARHGAP31/RASAL2/RIN3/AGAP1/ARAP1/GIT1/RGS6/RASA3/PREX1/VPS9D1/WNT11/PTPRN2/DOCK8/ASAP1/RALBP1/SYNGAP1/RGS12/RABGAP1L/SEMA4D/RAPGEF2/IQSEC1/TBC1D22B/NF1/RGS17/ASAP2/CCL20/VAV2/SH3BP4/SRGAP1/USP6NL/BCR/SIPA1L1/PLCB1/SNX18/ARHGAP25/TBC1D14/ARRB2/DOCK10/SIPA1L2/NTRK1/RGS3/ARHGEF10L/GARNL3/TBC1D2B/SGSM2/CORO1C/DNM1L/TBC1D1/ARHGAP17/F2R/ARHGAP15/RGS10/BCAR3/TMED2/TSC2/RSU1/ARHGEF15/CHN2/ARHGAP1/ARHGAP8/DOCK2/RGL3/ARHGAP12/ARHGAP10/NDEL1/RAP1GAP2/CCL22/TBC1D22A/VAV3/ARHGAP23/NPRL2/ARHGAP45                                                                                                    |
| Biological Process | GO:0051056 | regulation of small GTPase mediated signal transduction | 73/2279   | 323/18866 | 6.92E-08 | 8.22E-05 | 7.44E-05 | 73    | ARHGEF10/TIMP2/ABR/TRIO/FGD4/KANK1/RHOH/DENND1A/AKAP13/MYO9B/ARHGDI/ITPKB/ARHGAP26/RHOG/ARRB1/ARHGEF7/DNM2/ARHGAP31/ITSN1/DENND3/ARAP1/CUL3/LRRC59/RHOF/SYNPO2L/RASA3/PREX1/RALBP1/PLEKHG5/SYNGAP1/RHOBTB2/EP8L3/IQSEC1/EP8L1/NF1/MCF2L/VAV2/ABCA1/SRGAP1/BCR/ARHGEF25/SIPA1L1/ARHGAP25/SIPA1L2/NTRK1/GARNL3/ARHGEF18/NOTCH1/CYTH4/ARHGAP17/F2R/ARHGEF28/ARHGAP15/FOXM1/ARHGEF2/GPR4/TSC2/PDGFRB/CHN2/ARHGAP1/ARHGAP8/RALGPS1/ARHGAP12/ARHGAP10/FLOT1/RAP1GAP2/FBXO8/VAV3/ARHGAP23/PLEKHG2/PRAG1/ARHGAP45/CYRIB                                                                                                                                                                                                                                                                           |
| Biological Process | GO:0045785 | positive regulation of cell adhesion                    | 90/2279   | 428/18866 | 8.03E-08 | 8.48E-05 | 7.67E-05 | 90    | AZU1/ELANE/FUT4/HLA-DMB/PRKCZ/P4HB/RREB1/CALR/FUT7/SPOCK2/IL10/VIT/RHOH/LCK/MYB/RUNX1/SIRPB1/CD55/ANGPT1/DOCK1/ITGB1BP1/NLRP3/PIK3R1/ITPKB/CEACAM6/CCR2/PIK3R6/SMA D3/PRKCA/ARHGEF7/DNM2/TNF/CCL5/GRAP2/NCK2/TNFSF13B/ZFH3/ZBTB16/JUP/TGFB2/DISC1/NINJ1/RNASE10/PTPN6/EGFLAM/ILK/PREX1/SMAD7/ZMIZ1/DOCK8/JAK1/ZBTB7B/PTPRJ/RARA/LILRB4/CCDC88B/OLFM4/PTPRC/CSK/PLEKHA2/BCL10/SPTA1/ETS1/PNP/CASS4/ITGB2/NOD2/GCNT2/PRKCE/SIRPG/KIFAP3/HLX/RUNX3/RSU1/DYSF/CYLD/AP3D1/RELA/PTPRU/FLOT1/SLC7A1/MYADM/NODAL/LIF/FADD/VAV3/CYRIB/VSIR/PLPP3                                                                                                                                                                                                                                                   |

|                    |            |                                                                  |         |           |          |           |           |    |                                                                                                                                                                                                                                                                                                                                                                                                                                                                                                                                                                 |
|--------------------|------------|------------------------------------------------------------------|---------|-----------|----------|-----------|-----------|----|-----------------------------------------------------------------------------------------------------------------------------------------------------------------------------------------------------------------------------------------------------------------------------------------------------------------------------------------------------------------------------------------------------------------------------------------------------------------------------------------------------------------------------------------------------------------|
| Biological Process | GO:0022407 | regulation of cell-cell adhesion                                 | 90/2279 | 439/18866 | 2.66E-07 | 0.0002529 | 0.0002288 | 90 | ELANE/FUT4/HLA-<br>DMB/PRKCZ/FUT7/IL10/CD9/MAD1L1/RHOH/LCK/MYB/RUNX1/SIRPB1/CD55/NLRP3/PIK3R1/ITPKB/CEACAM6/CCR2/PIK3R6/PRKCA/SPINT2/LAX1/TNF/UBASH3B/CCL5/GRAP2/NCK2/LOXL3/SFTPD/EPHB3/TNFSF13B/DUSP22/ZBTB16/CCM2L/TGFBR2/ZDHHC2/RNASE10/MBP/PTPN6/MIR27A/SMAD7/TNFRSF21/MIA3/ZMIZ1/DOCK8/JAK1/ZBTB7B/TGFB1/IL1RN/TIGIT/RARA/LILRB4/ZC3H8/BLK/CCDC88B/PTPRC/CSK/BCL10/SPTA1/ETS1/PNP/ITGB2/CDH1/NOD2/NOTCH1/GCNT2/DUSP3/NOTCH4/SIRPG/KIFAP3/HLX/CEBPB/RUNX3/CYLD/AP3D1/ADTRP/RELA/PTPRU/FLOT1/SLC7A1/MYADM/NODAL/FADD/PELI1/TMEM131L/CYRIB/VSIR/MARCHF7/PLPP3 |
| Biological Process | GO:0008154 | actin polymerization or depolymerization                         | 53/2279 | 221/18866 | 6.13E-07 | 0.0005292 | 0.0004788 | 53 | VILL/TRIM27/GAS7/SSH1/GSN/KANK1/PSTPIP1/MSRB1/WIPF1/CTTN/COTL1/CAPG/CYFIP2/MICAL1/NCK2/MSRB2/MICAL2/WHAMM/MICAL3/BAIAP2L1/CDC42EP1/BIN1/BAIAP2/CORO7/SSH3/PREX1/WASL/FER/TMOD3/SVIL/PFN1/CSF3/GMFB/GHRL/WDR1/SPTA1/NCKAP1/ADD1/AVIL/PRKCE/FLII/MYO1C/SPTAN1/TMOD1/CYFIP1/GMFG/BAIAP2L2/MYADM/SPTBN4/DBNL/PLEKHG2/CATIP/CYRIB                                                                                                                                                                                                                                    |
| Biological Process | GO:0032970 | regulation of actin filament-based process                       | 83/2279 | 405/18866 | 7.81E-07 | 0.0006182 | 0.0005594 | 83 | TRPM2/VILL/ARHGEF10/PDE4D/TRIM27/TACSTD2/SSH1/GSN/KANK1/RHOH/CACNA1C/AKAP13/ARHGDI/ITGB1BP1/PIK3R1/RHOG/SMAD3/CTTN/COTL1/CAPG/CYFIP2/CSF1R/NCK2/GJA5/SH3PXD2B/WHAMM/JUP/ARAP1/BAIAP2L1/CDC42EP1/BIN1/MYH9/RHOF/BAIAP2/SYNPO2L/NOS1AP/SSH3/ILK/PREX1/PXN/WNT11/PPFIA1/WASL/FER/RHOBTB2/TMOD3/SVIL/PFN1/JAM3/CSF3/GMFB/ACTG1/WDR1/SPTA1/MIR138-2/NCKAP1/ADD1/ARHGEF10L/ARHGEF18/AVIL/MEF2C/PRKCE/FLII/ARHGAP17/MYO1C/PDGFRB/ARHGEF15/SPTAN1/ANK2/FRMD6/TMOD1/CYFIP1/GMFG/BAIAP2L2/MYADM/CCL27/SPTBN4/SYNPO/DAPK3/DBNL/PLEKHG2/PRKN/CYRIB                          |
| Biological Process | GO:2001238 | positive regulation of extrinsic apoptotic signaling pathway     | 20/2279 | 52/18866  | 1.08E-06 | 0.0007326 | 0.0006629 | 20 | TNF/TRAF2/DEDD2/THBS1/RIPK1/NF1/PTPRC/ITM2C/BMPR1B/STK3/BCL10/PPP2R1A/TRPS1/PPP2R1B/TNFSF12/CYLD/GOS2/INHBA/FADD/DAPK3                                                                                                                                                                                                                                                                                                                                                                                                                                          |
| Biological Process | GO:0018209 | peptidyl-serine modification                                     | 71/2279 | 333/18866 | 1.08E-06 | 0.0007326 | 0.0006629 | 71 | PRKCZ/PDE4D/RPTOR/LMTK2/MARK3/GALNT2/VRK2/MAST4/DYRK4/SPOCK2/CSNK1D/TNKS/ULK1/HIPK3/ANGPT1/ERN1/SRPK2/ARRB1/PRKCA/TNF/STK38L/SGK1/NCK2/HIPK2/TGFB R2/SMYD3/RIPK1/AKT3/APP/EGFLAM/RPS6KA4/ILK/SMAD7/LATS2/TGFB1/PRKCH/DGKQ/PRKCB/AXIN1/DYRK2/CAMK1D/CSF3/SH2D3C/CAB39/CSNK1E/PDGFB/MKNK1/PRKCI/ARRB2 /FNIP2/NEK6/PLCL1/MORC3/CLSPN/BCL2/PRKCE/GGNBP2/CHEK2/BCAR3/MAPKAPK3/STK32C/MARK2/SGK2/INPP5F/NTMT1/SPTBN4/NTF4/LIF/EIF4G1/PRKAA1/GRK2                                                                                                                      |
| Biological Process | GO:0018105 | peptidyl-serine phosphorylation                                  | 67/2279 | 310/18866 | 1.30E-06 | 0.0008173 | 0.0007396 | 67 | PRKCZ/PDE4D/RPTOR/LMTK2/MARK3/VRK2/MAST4/DYRK4/CSNK1D/TNKS/ULK1/HIPK3/ANGPT1/ERN1/SRPK2/ARRB1/PRKCA/TNF/STK38L/SGK1/NCK2/HIPK2/TGFB R2/SMYD3/RIPK1 /AKT3/APP/RPS6KA4/ILK/SMAD7/LATS2/TGFB1/PRKCH/DGKQ/PRKCB/AXIN1/DYRK2/CAMK1D/CSF3/SH2D3C/CAB39/CSNK1E/PDGFB/MKNK1/PRKCI/ARRB2/FNIP2/NEK6/PLCL1/MOR C3/CLSPN/BCL2/PRKCE/GGNBP2/CHEK2/BCAR3/MAPKAPK3/STK32C/MARK2/SGK2/INPP5F/SPTBN4/NTF4/LIF/EIF4G1/PRKAA1/GRK2                                                                                                                                                |
| Biological Process | GO:0032956 | regulation of actin cytoskeleton organization                    | 75/2279 | 360/18866 | 1.38E-06 | 0.0008173 | 0.0007396 | 75 | TRPM2/VILL/ARHGEF10/TRIM27/TACSTD2/SSH1/GSN/KANK1/RHOH/AKAP13/ARHGDI/ITGB1BP1/PIK3R1/RHOG/SMAD3/CTTN/COTL1/CAPG/CYFIP2/CSF1R/NCK2/SH3PXD2B/WHAM M/ARAP1/BAIAP2L1/CDC42EP1/BIN1/RHOF/BAIAP2/SYNPO2L/SSH3/ILK/PREX1/PXN/WNT11/PPFIA1/WASL/FER/RHOBTB2/TMOD3/SVIL/PFN1/JAM3/CSF3/GMFB/ACTG1/WDR1/SPT A1/MIR138-2/NCKAP1/ADD1/ARHGEF10L/ARHGEF18/AVIL/MEF2C/PRKCE/FLII/ARHGAP17/MYO1C/PDGFRB/ARHGEF15/SPTAN1/TMOD1/CYFIP1/GMFG/BAIAP2L2/MYADM/CCL27/SPTBN4/SYNP O/DAPK3/DBNL/PLEKHG2/PRKN/CYRIB                                                                     |
| Biological Process | GO:0030041 | actin filament polymerization                                    | 47/2279 | 193/18866 | 1.64E-06 | 0.0009178 | 0.0008305 | 47 | VILL/TRIM27/GAS7/SSH1/GSN/KANK1/PSTPIP1/MSRB1/CTTN/COTL1/CAPG/CYFIP2/NCK2/MSRB2/WHAMM/BAIAP2L1/CDC42EP1/BIN1/BAIAP2/CORO7/SSH3/PREX1/WASL/FER/TMO D3/SVIL/PFN1/CSF3/GMFB/SPTA1/NCKAP1/ADD1/AVIL/PRKCE/FLII/MYO1C/SPTAN1/TMOD1/CYFIP1/GMFG/BAIAP2L2/MYADM/SPTBN4/DBNL/PLEKHG2/CATIP/CYRIB                                                                                                                                                                                                                                                                        |
| Biological Process | GO:0051091 | positive regulation of DNA-binding transcription factor activity | 60/2279 | 270/18866 | 1.78E-06 | 0.0009392 | 0.0008498 | 60 | HDAC4/ARID5B/PRKCZ/NLR4/S100A8/TRIM27/IL10/AIM2/TRIM38/PPARG/TFDP1/TRIM8/NLRP3/SMAD3/TNF/TRAF2/TRAF1/HIPK2/TLR9/JUP/ERC1/TRAPPC9/RIPK1/APP/RPS6KA4/C LU/CRTC3/PRKCH/FER/PRKCB/RIPK3/COPPS/TRIM5/SLCO3A1/UBE2V1/CAMK1D/CSF3/STK3/BCL10/CAT/PRKCI/ITGB2/IRAK2/NTRK1/IL18RAP/NOD2/TCF3/STK36/RNF25/TP53BP1/IL1 8R1/ARHGEF2/LTF/RELA/FLOT1/NODAL/CX3CR1/TRIM26/STING1/PLPP3                                                                                                                                                                                         |

|                    |            |                                                                |         |           |          |           |           |    |                                                                                                                                                                                                                                                                                                                                                                                                                                                                                                                                                                           |
|--------------------|------------|----------------------------------------------------------------|---------|-----------|----------|-----------|-----------|----|---------------------------------------------------------------------------------------------------------------------------------------------------------------------------------------------------------------------------------------------------------------------------------------------------------------------------------------------------------------------------------------------------------------------------------------------------------------------------------------------------------------------------------------------------------------------------|
| Biological Process | GO:0006644 | phospholipid metabolic process                                 | 89/2279 | 455/18866 | 2.48E-06 | 0.0011778 | 0.0010657 | 89 | CPNE6/OSBPL5/PLA2G15/SYNJ2/PLBD2/PCYT1A/PIK3CD/SPTLC2/MFSD2A/IDI1/HEXB/INPP5A/VAC14/LPCAT1/PIP5K1B/INPP5D/LIPC/ABHD16A/PIK3R1/ITPKB/PIGL/PIK3R6/PIGU/PLD1/GPLD1/FGR/SMPDL3B/CSF1R/FPR2/TTC7A/PIGN/PGP/ACP6/PITPNM2/SLC44A4/INPP4A/PIK3R5/PIP4K2A/PITPNM1/CPNE1/FLT1/SPHK2/TGFB1/SGMS1/TTC7B/PGS1/DGKQ/SH3YL1/CHPT1/NR1H2/VAV2/ATG14/PCTP/GNB3/PLEKHA2/PDGFAB/ABHD16B/DGKA/DGKD/INPP5E/PLCB1/OSBPL10/IMPA2/SGMS2/MIR138-2/PI4K2A/SGPP1/NOD2/PI4KA/PIGQ/PLA1A/ABHD5/PDGFRB/RUFY1/WDR81/CHKB/HMGCS1/PLCG1/PTDSS2/INPP5F/LPIN1/CDS2/DPAGT1/VAV3/AGPAT5/ETNK2/IP6K1/SLA2/PLPP3 |
| Biological Process | GO:0007009 | plasma membrane organization                                   | 32/2279 | 113/18866 | 2.52E-06 | 0.0011778 | 0.0010657 | 32 | SH3TC2/GSN/CRB1/NDRG1/DNM2/ANXA6/WHAMM/ANO7/PACIN2/BAIAP2L1/BIN1/MYH9/BAIAP2/CLU/ASAP1/WASL/EPB41L3/MTSS1/PTPRC/SPTA1/MIR138-2/MICALL1/COL5A1/FA2H/FER1L6/ANO6/DYSF/ANK2/FER1L4/BAIAP2L2/FLOT1/SYPL2                                                                                                                                                                                                                                                                                                                                                                      |
| Biological Process | GO:0051014 | actin filament severing                                        | 10/2279 | 16/18866  | 2.60E-06 | 0.0011778 | 0.0010657 | 10 | VILL/GSN/CAPG/MYH9/FMNL1/SVIL/GMFB/AVIL/FLII/GMFG                                                                                                                                                                                                                                                                                                                                                                                                                                                                                                                         |
| Biological Process | GO:0051258 | protein polymerization                                         | 64/2279 | 300/18866 | 3.53E-06 | 0.0015224 | 0.0013775 | 64 | VILL/TRIM27/TBCD/DCTN1/GAS7/SSH1/GSN/CASQ2/KANK1/CSNK1D/NDE1/PSTPIP1/MSRB1/CTTN/DNM2/COTL1/CAPG/CYFIP2/NCK2/MSRB2/WHAMM/BAIAP2L1/NAV3/CDC42EP1/BIN1/BAIAP2/CORO7/SSH3/PREX1/WASL/FER/TMOD3/SVIL/PFN1/CSF3/GMFB/NUMA1/SPTA1/DNM1/NCKAP1/ADD1/DNM3/DNM1L/AVIL/TPPP3/PRKCE/FLII/MYO1C/SPTAN1/MX1/TMOD1/CYFIP1/TUBGCP2/NDEL1/GMFG/BAIAP2L2/CASQ1/MYADM/SPTBN4/DBNL/PLEKHG2/CATIP/PRKN/CYRIB                                                                                                                                                                                   |
| Biological Process | GO:0051092 | positive regulation of NF-kappaB transcription factor activity | 40/2279 | 159/18866 | 4.07E-06 | 0.0016798 | 0.00152   | 40 | PRKCZ/NLRC4/S100A8/TRIM27/AIM2/TRIM38/TRIM8/NLRP3/TNF/TRAF2/TRAF1/TLR9/ERC1/TRAPPC9/RIPK1/APP/RPS6KA4/CLU/PRKCH/FER/PRKCB/RIPK3/TRIM5/SLCO3A1/UBE2V1/BCL10/CAT/PRKCI/ITGB2/IRAK2/NTRK1/IL18RAP/NOD2/RNF25/IL18R1/ARHGEF2/LTF/RELA/FLOT1/CX3CR1                                                                                                                                                                                                                                                                                                                            |
| Biological Process | GO:0110053 | regulation of actin filament organization                      | 60/2279 | 278/18866 | 4.78E-06 | 0.0018935 | 0.0017133 | 60 | VILL/ARHGEF10/TRIM27/TACSTD2/SSH1/GSN/KANK1/ITGB1BP1/PIK3R1/SMAD3/CTTN/COTL1/CAPG/CYFIP2/NCK2/SH3PXD2B/WHAMM/ARAP1/BAIAP2L1/CDC42EP1/BIN1/BAIAP2/SYNPO2L/SSH3/PREX1/PXN/WNT11/PPFIA1/WASL/FER/TMOD3/SVIL/PFN1/CSF3/GMFB/ACTG1/WDR1/SPTA1/MIR138-2/NCKAP1/ADD1/ARHGEF10L/ARHGEF18/AVIL/PRKCE/FLII/MYO1C/ARHGEF15/SPTAN1/TMOD1/CYFIP1/GMFG/BAIAP2L2/MYADM/SPTBN4/SYNPO/DBNL/PLEKHG2/PRKN/CYRIB                                                                                                                                                                              |
| Biological Process | GO:0048193 | Golgi vesicle transport                                        | 75/2279 | 374/18866 | 5.98E-06 | 0.0022346 | 0.002022  | 75 | CTSZ/OSBPL5/DCTN1/SORL1/SERPINA1/AP2A1/TGFA/STX5/VTI1A/ANKFY1/CSNK1D/CD55/KIF13A/DNM2/TRAPPC10/RAB31/SEC23B/MYO18A/DYNC1H1/LMAN2/WHAMM/YIF1A/CUX1/CUX1/TRAPPC9/SNX3/CORO7/ERGIC1/UVRAG/MIA3/COG1/DCTN2/BICD2/VAMP5/CNIH2/SEC22C/MYO5A/CD59/TRAPPC3L/COG8/HTT/SEC13/CSK/NUMA1/CREB3L2/SPTA1/TBC1D14/ANKRD28/PRKCI/SORT1/SEC24C/NBAS/AP1G2/SGSM2/CNIH4/COG5/KIFAP3/EPS15/LMF1/TMED2/ARF5/SPTAN1/ANK2/AP3D1/SPTBN4/VPS51/CUX2/SEC31A/TEX261/TRAPPC2B/MIA2/VPS35L/TRAPPC2/PLPP3/DOP1B                                                                                         |
| Biological Process | GO:0048017 | inositol lipid-mediated signaling                              | 46/2279 | 196/18866 | 6.12E-06 | 0.0022346 | 0.002022  | 46 | GSN/PIK3CD/PRR5L/PIP5K1B/ANGPT1/PIK3AP1/PIK3R1/GAB2/PLD1/FGR/TNF/CCL5/CSF1R/UNC5B/PITPNM2/PIK3R5/PIP4K2A/PTPN6/IGF1R/FLT1/FGFR1/SEMA4D/PPP2R5C/NF1/PDGF/PRR5/CSF3/PDGFB/INPP5E/PLCB1/CAT/PLCL1/NTRK1/PI4KA/F2R/UBE3A/PDGFC/NEDD4/TSC2/PDGFRB/PPP1R16B/TYRO3/KBTBD2/INPP5F/PLCD3/EZR                                                                                                                                                                                                                                                                                       |
| Biological Process | GO:0007159 | leukocyte cell-cell adhesion                                   | 73/2279 | 364/18866 | 7.90E-06 | 0.0026478 | 0.0023958 | 73 | ELANE/FUT4/HLA-DMB/PRKCZ/S100A8/FUT7/IL10/OLR1/MAD1L1/RHOH/LCK/MYB/RUNX1/SIRPB1/CD55/CD177/NLRP3/PIK3R1/ITPKB/CCR2/PIK3R6/LAX1/TNF/CCL5/GRAP2/NCK2/LOXL3/SFTPD/TNFSF13B/DUSP22/ZBTB16/TGFBR2/PTPN6/MIR27A/SMAD7/TNFRSF21/MIA3/ZMIZ1/DOCK8/ZBTB7B/TIGIT/SEMA4D/RARA/LILRB4/ZC3H8/CCDC88B/TNIP1/PTPRC/CSK/BCL10/SPTA1/ETS1/PNP/ITGB2/NOD2/DUSP3/SIRPG/HLX/CEBPB/RUNX3/CYLD/AP3D1/ADTRP/RELA/EZR/SLC7A1/CX3CR1/FADD/PELI1/TMEM131L/CYRIB/VSIR/MARCH7                                                                                                                         |

|                    |            |                                                                |         |           |          |           |           |    |                                                                                                                                                                                                                                                                                                                                                                                                                                                                                                                                                                                     |
|--------------------|------------|----------------------------------------------------------------|---------|-----------|----------|-----------|-----------|----|-------------------------------------------------------------------------------------------------------------------------------------------------------------------------------------------------------------------------------------------------------------------------------------------------------------------------------------------------------------------------------------------------------------------------------------------------------------------------------------------------------------------------------------------------------------------------------------|
| Biological Process | GO:0048015 | phosphatidylinositol-mediated signaling                        | 45/2279 | 192/18866 | 7.97E-06 | 0.0026478 | 0.0023958 | 45 | GSN/PIK3CD/PRR5L/PIP5K1B/ANGPT1/PIK3AP1/PIK3R1/GAB2/FGR/TNF/CCL5/CSF1R/UNC5B/PITPNM2/PIK3R5/PIP4K2A/PTPN6/IGF1R/FLT1/FGFR1/SEMA4D/PPP2R5C/NF1/PDGFB/RR5/CSF3/PDGFB/INPP5E/PLCB1/CAT/PLCL1/NTRK1/PI4KA/F2R/UBE3A/PDGFC/NEDD4/TSC2/PDGFRB/PPP1R16B/TYRO3/KBTBD2/INPP5F/PLCD3/EZR                                                                                                                                                                                                                                                                                                      |
| Biological Process | GO:0051090 | regulation of DNA-binding transcription factor activity        | 87/2279 | 455/18866 | 8.16E-06 | 0.0026478 | 0.0023958 | 87 | HDAC4/ARID5B/PRKCZ/NLRC4/S100A8/TRIM27/GFI1/IL10/AIM2/TRIM38/PPARG/TFDP1/TRIM8/WWP2/PRMT2/NLRP3/SMAD3/ARRB1/SUFU/TNF/TRAF2/TNFAIP3/SGK1/TRAF1/MIR101-2/HIPK2/TLR9/TRAIP/JUP/ERC1/TRAPPC9/RIPK1/APP/MIR27A/TCF7L2/RPS6KA4/CLU/SMAD7/MTURN/CRTC3/PRKCH/FER/FANCA/PRKCB/RIPK3/COP5/TRIM5/SLCO3A1/UBE2V1/ME D13/CAMK1D/CSF3/STK3/BCL10/NLRC5/CAT/PRKCI/ARRB2/ITGB2/MIR138-2/IRAK2/NTRK1/IL18RAP/NOD2/RB1/TCF3/STK36/RNF25/TP53BP1/IL18R1/SP100/ARHGFE2/LTF/TRIB1/CYLD/RELA/FLOT1/PARP10/NODAL/CX3CR1/PELI1/COMMD6/TRIM26/PAXIP1/ADGRG3/STING1/PLPP3                                     |
| Biological Process | GO:0045216 | cell-cell junction organization                                | 48/2279 | 210/18866 | 8.36E-06 | 0.0026478 | 0.0023958 | 48 | PRTN3/TBCD/CD9/CADM3/TLN2/HDAC7/TJP2/RUNX1/CD177/SMAD3/PRKCA/TNF/CSF1R/GJAS/CCM2/JUP/PKP1/ACTN4/SMAD7/WNT11/CDH3/TGFB1/PRKCH/PLEKHA7/PERP/EPB41L3/JAM3/NUMB/ACTG1/CSK/GRHL2/CDH4/WDR1/PRKCI/CDH1/ADD1/MPP7/F2R/SDK2/CNTNAP1/MYO1C/ANK2/CADM1/CDH11/KIFC3/NPHP4/NECTIN1/NECTIN4                                                                                                                                                                                                                                                                                                      |
| Biological Process | GO:0014068 | positive regulation of phosphatidylinositol 3-kinase signaling | 26/2279 | 88/18866  | 9.27E-06 | 0.0028423 | 0.0025718 | 26 | PIK3CD/PRR5L/ANGPT1/PIK3AP1/PIK3R1/FGR/TNF/CCL5/UNC5B/PIK3R5/PTPN6/IGF1R/FLT1/FGFR1/SEMA4D/PDGFB/PRR5/CSF3/PDGFB/CAT/NTRK1/F2R/UBE3A/PDGFC/NEDD4/PDGFB                                                                                                                                                                                                                                                                                                                                                                                                                              |
| Biological Process | GO:0001933 | negative regulation of protein phosphorylation                 | 85/2279 | 444/18866 | 9.84E-06 | 0.0028647 | 0.0025921 | 85 | PRKCZ/PDE4D/TRIM27/RPTOR/SPRED2/PRKAG2/SORL1/SH3BP5L/PRR5L/ITPRIP/PPP1R1B/HIPK3/ANGPT1/PRKAR1B/ITGB1BP1/DUSP14/SLC8A1/ARRB1/LDLRAD4/LAX1/UBASH3B/TNFAIP3/MICAL1/NCK2/FBXO7/SH3BP5/DUSP22/TESC/CTDSPL/SMYD3/PTPN6/MIR24-2/ILK/PRKRIP1/SMAD7/IGF1R/LATS2/TGFB1/PHB/PTPRJ/SEMA4D/DGKQ/NF1/LRRK1/MLLT1/GMFB/WWTR1/TNIP1/ATG14/PTPRC/CSK/PPP2R1A/ENG/ARRB2/TAOK3/PPP2R5D/MIR138-2/RGS3/RB1/PER1/CORO1C/DUSP3/GGNBP2/ZBED3/FOXM1/DUS2/TSC2/FOXO1/HHEX/TRIB1/CYLD/HEXIM1/INPP5F/GMFG/EZR/MYADM/DTNBP1/MECOM/LIF/EIF4G1/NDRG2/SIRT3/NIBAN1/PRKN/PLPP3                                       |
| Biological Process | GO:1902903 | regulation of supramolecular fiber organization                | 74/2279 | 373/18866 | 1.02E-05 | 0.0028647 | 0.0025921 | 74 | VILL/ARHGFE10/TRIM27/TBCD/TACSTD2/DCTN1/SSH1/GSN/KANK1/AKAP13/ITGB1BP1/PIK3R1/SMAD3/CTTN/COTL1/CAPG/CYFIP2/NCK2/SH3PXD2B/WHAMM/ARAP1/BAIAP2L1/NAV3/CDC42EP1/BIN1/BAIAP2/SYNPO2L/APP/SSH3/PREX1/CLU/PXN/WNT11/PPFIA1/WASL/FER/TMOD3/SVIL/PFN1/CSF3/GMFB/ACTG1/NUMA1/WDR1/SPTA1/MIR138-2/NCKAP1/ADD1/ARHGFE10L/AEBP1/RB1/ARHGFE18/MAP1A/AVIL/MEF2C/PRKCE/FLII/ARHGFE2/MYO1C/ARHGFE15/SPTAN1/TMOD1/CYFIP1/GMFG/BAIAP2L2/MYADM/SPTBN4/SPEF1/SYNPO/DAPK3/DBNL/PLEKHG2/PRKN/CYRIB                                                                                                         |
| Biological Process | GO:0042326 | negative regulation of phosphorylation                         | 91/2279 | 484/18866 | 1.03E-05 | 0.0028647 | 0.0025921 | 91 | HDAC4/PRKCZ/PDE4D/TRIM27/RPTOR/SPRED2/PRKAG2/SORL1/SH3BP5L/PRR5L/ITPRIP/RHOH/PPP1R1B/HIPK3/ANGPT1/PRKAR1B/ITGB1BP1/DUSP14/SLC8A1/ARRB1/LDLRAD4/LAX1/UBASH3B/TNFAIP3/MICAL1/NCK2/FBXO7/SH3BP5/DUSP22/CBFA2T3/TESC/CTDSPL/SMYD3/PTPN6/MIR24-2/ILK/PRKRIP1/SMAD7/IGF1R/LATS2/TGFB1/PHB/PTPRJ/SEMA4D/DGKQ/NF1/LRRK1/MLLT1/GMFB/WWTR1/TNIP1/ATG14/PTPRC/CSK/PPP2R1A/ENG/ARRB2/TAOK3/PPP2R5D/MIR138-2/RGS3/RB1/PER1/CORO1C/DUSP3/GGNBP2/ZBED3/FOXM1/DUS2/TSC2/FOXO1/HHEX/TRIB1/CYLD/HEXIM1/ANKLE2/INPP5F/GMFG/EZR/MYADM/DTNBP1/INHBA/MECOM/LIF/EIF4G1/NDRG2/SIRT3/NPRL2/NIBAN1/PRKN/PLPP3 |
| Biological Process | GO:0007599 | hemostasis                                                     | 70/2279 | 348/18866 | 1.08E-05 | 0.0029152 | 0.0026378 | 70 | PRTN3/ZFPM1/EHD1/GP9/SERPINA1/PLAU/CD9/ENTPD1/ITPR2/LCK/DOCK6/CD177/FLI1/PRKAR1B/DOCK1/PIK3R1/PIK3R6/PABPC4/ARRB1/PRKCA/UBASH3B/MICAL1/MYL12A/SERP1NB2/ITPR1/THBS1/MYH9/RAB27A/PIK3R5/ITGA2B/PTPN6/ZNF385A/ILK/HDAC1/DOCK8/F12/PRKCH/DGKQ/PRKCB/HBB/ADAMTS13/BLK/CD59/VAV2/GNA11/ITGB3/ACTG1/PDGFB/DGKA/DGKD/NFE2L2/ARRB2/PAPSS2/YWHAZ/GNG2/P2RX1/PRKCE/GNA12/CPB2/F2R/ANO6/HPS6/TYRO3/IRF2/ADTRP/P2RX5/DTNBP1/ANXA7/VAV3/H3C1                                                                                                                                                      |
| Biological Process | GO:0022409 | positive regulation of cell-cell adhesion                      | 59/2279 | 279/18866 | 1.10E-05 | 0.0029152 | 0.0026378 | 59 | ELANE/FUT4/HLA-DMB/PRKCZ/FUT7/IL10/RHOH/LCK/MYB/RUNX1/SIRPB1/CD55/NLRP3/PIK3R1/ITPKB/CEACAM6/CCR2/PIK3R6/TNF/CCL5/GRAP2/NCK2/TNFSF13B/ZBTB16/TGFBR2/RNASE10/PTPN6/SMAD7/ZMIZ1/DOCK8/JAK1/ZBTB7B/RARA/LILRB4/CCDC88B/PTPRC/CSK/BCL10/SPTA1/ETS1/PNP/ITGB2/NOD2/GCNT2/SIRPG/KIFAP3/HLX/RUNX3/CYLD/AP3D1/RELA/PTPRU/FLOT1/SLC7A1/NODAL/FADD/CYRIB/VSIR/PLPP3                                                                                                                                                                                                                           |

|                    |            |                                                    |         |           |          |           |           |    |                                                                                                                                                                                                                                                                                                                                                                                                                                                                                                                                                                                            |
|--------------------|------------|----------------------------------------------------|---------|-----------|----------|-----------|-----------|----|--------------------------------------------------------------------------------------------------------------------------------------------------------------------------------------------------------------------------------------------------------------------------------------------------------------------------------------------------------------------------------------------------------------------------------------------------------------------------------------------------------------------------------------------------------------------------------------------|
| Biological Process | GO:2001235 | positive regulation of apoptotic signaling pathway | 43/2279 | 183/18866 | 1.17E-05 | 0.0030121 | 0.0027254 | 43 | TRIM39/S100A8/TFDP1/GSN/LCK/YWHAH/PLAGL2/BMF/SMAD3/TNF/TRAF2/NCK2/DEDD2/THBS1/CTSH/RIPK1/NACC2/CIDEB/RIPK3/NF1/PTPRC/ITM2C/BMPR1B/STK3/BCL10/PPP2R1A/TRPS1/YWHAZ/FIS1/BCL2/DNM1L/PPP2R1B/TP53BP2/BCL2L1/TNFSF12/CYLD/YWHAQ/GOS2/ING5/INHBA/FADD/DAPK3/FBH1                                                                                                                                                                                                                                                                                                                                 |
| Biological Process | GO:0061448 | connective tissue development                      | 56/2279 | 262/18866 | 1.32E-05 | 0.0032978 | 0.002984  | 56 | CSGALNACT1/ARID5B/ZNF516/SORL1/SLC25A25/SPTLC2/MEF2D/CHI3L1/RUNX1/LRP5L/CHSY1/SMAD3/TGFB1/GPLD1/ANXA6/SH3PX2B/CHST11/ZBTB16/TGFBR2/SMAD7/POC1A/WNT11/FGFR1/PAX7/TGFB1/RARA/POR/PDGFD/GHRL/RARG/BMPR1B/WNT5B/RUNX2/IL6R/PDGFB/FTO/CREB3L2/KLF7/TRPS1/NOTCH1/SLC39A13/COL5A1/MEF2C/NPPC/GPR4/RUNX3/PDGFRB/CRIP1/ACAT1/GDF6/RELA/ZNF219/PAXIP1/RFLNA/SPART/CCN4                                                                                                                                                                                                                               |
| Biological Process | GO:0002683 | negative regulation of immune system process       | 87/2279 | 463/18866 | 1.63E-05 | 0.0039707 | 0.0035928 | 87 | TRIM27/ZFPM1/ABR/IL10/TRIM38/PPARG/MAD1L1/RUNX1/CD55/INPP5D/PIK3R1/ITPKB/CCR2/FGR/LAX1/TNF/UBASH3B/TNFAIP3/LOXL3/SFTPD/CD84/FBXO7/MNDA/DUSP22/PADI2/ZBTB16/THBS1/DLL1/CSAR2/HLA-F/PTPN6/MIR24-2/MIR27A/SMAD7/TNFRSF21/MIA3/WASL/ZBTB7B/TGFB1/FER/PTPRJ/TIGIT/RARA/TMEM178A/LILRB4/NF1/ZC3H8/BLK/CD59/NR1H2/PGLYRP1/SEC14L1/PTPRC/BCL10/GRN/NLRC5/BCR/MEIS2/CNR2/LRR17/PLCB1/NFE2L2/ARRB2/HOXA9/MEIS1/NOTCH1/DUSP3/ELF1/BANK1/LTF/HLX/CD68/CEBPB/RUNX3/TRIB1/TYRO3/ADTRP/CD96/EZR/INHBA/FADD/PELI1/TMEM131L/VSIR/ILRUN/MARCHF7/SLA2                                                         |
| Biological Process | GO:0030833 | regulation of actin filament polymerization        | 41/2279 | 174/18866 | 1.73E-05 | 0.0040998 | 0.0037096 | 41 | VILL/TRIM27/SSH1/GSN/KANK1/CTTN/COTL1/CAPG/CYFIP2/NCK2/WHAMM/BAIAP2L1/CDC42EP1/BIN1/BAIAP2/SSH3/PREX1/WASL/FER/TMOD3/SVIL/PFN1/CSF3/GMFB/SPTA1/NCKAP1/ADD1/AVIL/PRKCE/FLII/MYO1C/SPTAN1/TMOD1/CYFIP1/GMFG/BAIAP2L2/MYADM/SPTBN4/DBNL/PLEKHG2/CYRIB                                                                                                                                                                                                                                                                                                                                         |
| Biological Process | GO:0002573 | myeloid leukocyte differentiation                  | 47/2279 | 210/18866 | 1.85E-05 | 0.0042876 | 0.0038796 | 47 | CEBPE/PRTN3/ZFPM1/FOX1/SBNO2/PPARG/PIK3CD/CREB1/MIR145/RUNX1/INPP5D/PIK3R1/GAB2/PRKCA/TNF/UBASH3B/CSF1R/CBFA2T3/TGFBR2/TESC/MYH9/RIPK1/APP/RBPJ/TGFB1/CD101/RARA/TMEM178A/LILRB4/NF1/LRRK1/SP3/CSF3/TMEM64/LRR17/RB1/MEF2C/TSPAN2/OSTM1/LTF/CEBPB/TRIB1/FAM20C/INHBA/LIF/FADD/CCN4                                                                                                                                                                                                                                                                                                         |
| Biological Process | GO:0022604 | regulation of cell morphogenesis                   | 92/2279 | 499/18866 | 2.04E-05 | 0.004575  | 0.0041396 | 92 | SEMA6B/CPNE6/P4HB/PLXNC1/RREB1/TACSTD2/PARVB/CALR/FMNL3/KIF13B/FGD4/KANK1/RHOH/MFSD2A/HEXB/SHROOM3/YWHAH/DOCK1/ITGB1BP1/RHOG/ARHGEF7/CTTN/DNM2/FGR/CPNE5/ZEB2/CSF1R/EPHB3/BCL11A/FGD5/SEMA4A/RTN4/ARAP1/CDC42EP1/TNIK/DISC1/MYH9/RHOF/CUX1/BAIAP2/SEMA4B/FMNL1/ACTN4/IFRD1/ILK/LIMD1/PREX1/SDC2/SYNGAP1/RHOBTB2/SEMA4D/RAPGEF2/SMURF1/ZSWIM5/SS18L2/EPB41L3/OLFM4/CDH4/WDR1/PALM/SIPA1L1/SPTA1/CASS4/ITGB2/ARHGEF18/DNM3/CORO1C/CDKL3/STRIP1/DNM1L/SYT17/GNA12/UBE3A/PDZD8/ARHGAP15/NEDD4/HECW2/EPB42/MARK2/CYFIP1/TRPV2/NDEL1/EZR/MYADM/ANXA7/CUX2/DAPK3/DBNL/PRAG1/SPART/PALM2AKAP2/PRKN |
| Biological Process | GO:1903037 | regulation of leukocyte cell-cell adhesion         | 66/2279 | 329/18866 | 2.09E-05 | 0.004575  | 0.0041396 | 66 | ELANE/FUT4/HLA-DMB/PRKCZ/FUT7/IL10/MAD1L1/RHOH/LCK/MYB/RUNX1/SIRPB1/CD55/NLRP3/PIK3R1/ITPKB/CCR2/PIK3R6/LAX1/TNF/CCL5/GRAP2/NCK2/LOXL3/SFTPD/TNFSF13B/DUSP22/ZBTB16/TGFBR2/PTPN6/MIR27A/SMAD7/TNFRSF21/MIA3/ZMIZ1/DOCK8/ZBTB7B/TIGIT/RARA/LILRB4/ZC3H8/CCDC88B/PTPRC/CSK/BCL10/SPTA1/ETS1/PNP/ITGB2/NOD2/DUSP3/SIRPG/HLX/CEBPB/RUNX3/CYLD/AP3D1/ADTRP/RELA/SLC7A1/FADD/PELI1/TMEM131L/CYRIB/VSIR/MARCHF7                                                                                                                                                                                   |
| Biological Process | GO:0030168 | platelet activation                                | 38/2279 | 158/18866 | 2.12E-05 | 0.004575  | 0.0041396 | 38 | GP9/CD9/ITPR2/LCK/PIK3R1/PIK3R6/ARRB1/PRKCA/UBASH3B/MYL12A/ITPR1/MYH9/PIK3R5/ITGA2B/PTPN6/ILK/PRKCH/DGKQ/PRKCB/HBB/ADAMTS13/BLK/VAV2/GNA11/ITGB3/ACTG1/PDGFB/DGKA/DGKD/ARRB2/YWHAZ/GNG2/P2RX1/PRKCE/GNA12/F2R/TYRO3/VAV3                                                                                                                                                                                                                                                                                                                                                                   |
| Biological Process | GO:0002062 | chondrocyte differentiation                        | 29/2279 | 108/18866 | 2.23E-05 | 0.0047166 | 0.0042678 | 29 | MEF2D/RUNX1/CHSY1/SMAD3/TGFB1/GPLD1/ANXA6/CHST11/ZBTB16/TGFBR2/SMAD7/POC1A/FGFR1/TGFB1/POR/RARG/BMPR1B/WNT5B/RUNX2/CREB3L2/TRPS1/MEF2C/NPPC/RUNX3/GDF6/RELA/ZNF219/RFLNA/CCN4                                                                                                                                                                                                                                                                                                                                                                                                              |

|                    |            |                                                       |         |           |          |           |           |    |                                                                                                                                                                                                                                                                                                                                                                                                                                                         |
|--------------------|------------|-------------------------------------------------------|---------|-----------|----------|-----------|-----------|----|---------------------------------------------------------------------------------------------------------------------------------------------------------------------------------------------------------------------------------------------------------------------------------------------------------------------------------------------------------------------------------------------------------------------------------------------------------|
| Biological Process | GO:0030111 | regulation of Wnt signaling pathway                   | 73/2279 | 375/18866 | 2.29E-05 | 0.0047215 | 0.0042722 | 73 | RNF220/KANK1/CSNK1D/TNKS/CCDC88C/MIR145/RUNX1/SKI/SMAD3/AMFR/ZEB2/TNFAIP3/VGLL4/FAM53B/UBAC2/NFATC1/JUP/CUL3/DISC1/GRB10/SNX3/APP/RBPJ/TCF7L2/CDK14/ILK/LIMD1/HDAC1/LATS2/WNT11/CDH3/TGFB1/KREMEN1/AXIN1/TLE1/LRRK1/WWTR1/TMEM64/WNT5B/STK3/CSNK1E/PSMF1/RNF213/PPP2R1A/KREMEN2/ARNTL/NXN/PSMB7/TTC21B/NOTCH1/ZBED3/TSC2/FOXO1/CHD8/HHEX/CYLD/ANKRD6/RUVBL1/ZBED2/PPM1N/PTPRU/CCNY/GID8/DAPK3/PSMD13/TSKU/NPHP4/TMEM131L/ADGRA2/PRKN/ATP6V0C/PLPP3/CCN4 |
| Biological Process | GO:0050766 | positive regulation of phagocytosis                   | 21/2279 | 68/18866  | 3.15E-05 | 0.0063694 | 0.0057633 | 21 | AZU1/ABR/CALR/PPARG/SIRPB1/SLC11A1/DNM2/RAB31/TNF/MYO18A/SFTPD/FPR2/LMAN2/RAB27A/PTPRJ/CAMK1D/PTPRC/BCR/SIRPG/ANO6/DOCK2                                                                                                                                                                                                                                                                                                                                |
| Biological Process | GO:1990845 | adaptive thermogenesis                                | 37/2279 | 155/18866 | 3.22E-05 | 0.006373  | 0.0057665 | 37 | ZNF516/SORL1/THADA/LCN2/ACSL1/MAP2K6/LNPEP/ACOT13/CCR2/RHEB/DYNC1H1/GRB10/RBPJ/PRKAB1/IGF1R/ZBTB7B/NR1H2/GHRL/PCTP/ARNTL/PRDM16/PLCL1/PER2/RB1/NOTCH1/EPAS1/IL18R1/PDGFC/CEBPB/GADD45G/SCD/TRPV2/ZNF423/LPIN1/G0S2/BSCL2/IP6K1                                                                                                                                                                                                                          |
| Biological Process | GO:0014066 | regulation of phosphatidylinositol 3-kinase signaling | 32/2279 | 127/18866 | 3.48E-05 | 0.0064343 | 0.005822  | 32 | PIK3CD/PRR5L/PIP5K1B/ANGPT1/PIK3AP1/PIK3R1/FGR/TNF/CCL5/UNC5B/PIK3R5/PIP4K2A/PTPN6/IGF1R/FLT1/FGFR1/SEMA4D/PPP2R5C/PDGFD/PRR5/CSF3/PDGFB/INPP5E/CAT/NTRK1/F2R/UBE3A/PDGFC/NEDD4/TSC2/PDGFRB/PPP1R16B                                                                                                                                                                                                                                                    |
| Biological Process | GO:0106106 | cold-induced thermogenesis                            | 35/2279 | 144/18866 | 3.48E-05 | 0.0064343 | 0.005822  | 35 | ZNF516/LCN2/ACSL1/MAP2K6/LNPEP/ACOT13/CCR2/RHEB/DYNC1H1/GRB10/RBPJ/PRKAB1/IGF1R/ZBTB7B/NR1H2/GHRL/PCTP/ARNTL/PRDM16/PLCL1/PER2/RB1/NOTCH1/EPAS1/IL18R1/PDGFC/CEBPB/GADD45G/SCD/TRPV2/ZNF423/LPIN1/G0S2/BSCL2/IP6K1                                                                                                                                                                                                                                      |
| Biological Process | GO:0120161 | regulation of cold-induced thermogenesis              | 35/2279 | 144/18866 | 3.48E-05 | 0.0064343 | 0.005822  | 35 | ZNF516/LCN2/ACSL1/MAP2K6/LNPEP/ACOT13/CCR2/RHEB/DYNC1H1/GRB10/RBPJ/PRKAB1/IGF1R/ZBTB7B/NR1H2/GHRL/PCTP/ARNTL/PRDM16/PLCL1/PER2/RB1/NOTCH1/EPAS1/IL18R1/PDGFC/CEBPB/GADD45G/SCD/TRPV2/ZNF423/LPIN1/G0S2/BSCL2/IP6K1                                                                                                                                                                                                                                      |
| Biological Process | GO:0031532 | actin cytoskeleton reorganization                     | 28/2279 | 105/18866 | 3.52E-05 | 0.0064343 | 0.005822  | 28 | TRPM2/PARVB/GSN/ARHGDI8/CTTN/CSF1R/WHAMM/ARAP1/BAIAP2L1/TNIK/MYH9/BAIAP2/FER/CSF3/SIPA1L1/CASS4/RALA/INSRR/S1PR2/PARVG/PDLIM4/CDC42BPB/GMFG/EZR/BAIAP2L2/CCL27/DTNBP1/DAPK3                                                                                                                                                                                                                                                                             |
| Biological Process | GO:0008360 | regulation of cell shape                              | 37/2279 | 156/18866 | 3.74E-05 | 0.0066988 | 0.0060613 | 37 | PLXNC1/PARVB/FMNL3/FGD4/RHOH/HEXB/SHROOM3/RHOG/FGR/CSF1R/FGD5/SEMA4A/ARAP1/CDC42EP1/MYH9/RHOF/BAIAP2/FMNL1/LIMD1/RHOBTB2/SEMA4D/EPB41L3/WDR1/PALM/SPTA1/ITGB2/ARHGFE18/GNA12/ARHGAP15/EPB42/MARK2/CYFIP1/EZR/ANXA7/DAPK3/PRAG1/PALM2AKAP2                                                                                                                                                                                                               |
| Biological Process | GO:0001659 | temperature homeostasis                               | 40/2279 | 174/18866 | 3.97E-05 | 0.0069869 | 0.006322  | 40 | TRPM2/ZNF516/LCN2/ACSL1/MAP2K6/LNPEP/ACOT13/CCR2/RHEB/TNF/DYNC1H1/GRB10/RBPJ/PRKAB1/IGF1R/ZBTB7B/NR1H2/GHRL/PCTP/FTO/ARNTL/PRDM16/PLCL1/PER2/RB1/NOTCH1/EPAS1/IL18R1/PDGFC/CEBPB/FOXO1/GADD45G/SCD/TRPV2/ZNF423/LPIN1/G0S2/ACADVL/BSCL2/IP6K1                                                                                                                                                                                                           |

|                    |            |                                                |         |           |          |           |           |    |                                                                                                                                                                                                                                                                                                                                                                                                                                                                                                                                                       |
|--------------------|------------|------------------------------------------------|---------|-----------|----------|-----------|-----------|----|-------------------------------------------------------------------------------------------------------------------------------------------------------------------------------------------------------------------------------------------------------------------------------------------------------------------------------------------------------------------------------------------------------------------------------------------------------------------------------------------------------------------------------------------------------|
| Biological Process | GO:1904018 | positive regulation of vasculature development | 50/2279 | 235/18866 | 4.23E-05 | 0.0073144 | 0.0066183 | 50 | LRG1/IL10/C3AR1/MIR140/MAP3K3/MIR143/MIR145/RIN2/CHI3L1/HDAC7/RUNX1/PIK3R6/PRKCA/MIR199A1/MIR101-2/HIPK2/JUP/TGFBR2/THBS1/CTSH/DLL1/AKT3/MIR27A/MIR23A/FLT1/JAK1/AGO2/RAPGEF2/PRKCB/AQP1/PDGFD/BMPER/HK2/GHRL/IL6R/GRN/PDGFB/ETS1/NFE2L2/ENG/ITGB2/PKM/MIR199A2/NOTCH1/AGTR1/PPP1R16B/TNFSF12/PLCG1/NODAL/CX3CR1                                                                                                                                                                                                                                      |
| Biological Process | GO:0007596 | blood coagulation                              | 67/2279 | 343/18866 | 4.36E-05 | 0.0073951 | 0.0066913 | 67 | PRTN3/ZFPM1/EHD1/GP9/SERPINA1/PLAU/CD9/ENTPD1/ITPR2/LCK/DOCK6/CD177/PRKAR1B/DOCK1/PIK3R1/PIK3R6/PABPC4/ARRB1/PRKCA/UBASH3B/MICAL1/MYL12A/SERPINB2/ITPR1/THBS1/MYH9/RAB27A/PIK3R5/ITGA2B/PTPN6/ILK/HDAC1/DOCK8/F12/PRKCH/DGKQ/PRKCB/HBB/ADAMTS13/BLK/CD59/VAV2/GNA11/ITGB3/ACTG1/PDGFB/DGKA/DGKD/NFE2L2/ARRB2/PAPSS2/YWHAZ/GNG2/P2RX1/PRKCE/GNA12/CPB2/F2R/ANO6/HPS6/TYRO3/IRF2/ADTRP/P2RX5/DTNBP1/VAV3/H3C1                                                                                                                                           |
| Biological Process | GO:0032535 | regulation of cellular component size          | 73/2279 | 383/18866 | 4.72E-05 | 0.0078549 | 0.0071074 | 73 | SEMA6B/VILL/TRIM27/RPTOR/SSH1/CLCN6/GSN/KANK1/CREB1/CTTN/DNM2/COTL1/CAPG/CYFIP2/NCK2/WHAMM/SEMA4A/RTN4/BAIAP2L1/CDC42EP1/BIN1/DISC1/BAIAP2/SEMA4B/SSH3/IFRD1/ILK/PREX1/WASL/FER/SEMA4D/TMOD3/AQP1/SVIL/PFN1/CDHR2/CSF3/GMFB/VAV2/RARG/GNB3/CDH4/WDR1/SPTA1/NCKAP1/ADD1/CDKL3/AVIL/PRKCE/FLII/PEX11B/MYO1C/ANO6/SPTAN1/TMOD1/CYFIP1/TRPV2/WBTC1/NDEL1/GMFG/SLC12A1/EZR/BAIAP2L2/RAP1GAP2/MYADM/SPTBN4/SLC12A7/ANXA7/VAV3/DBNL/PLEKHG2/SPART/CYRIB                                                                                                      |
| Biological Process | GO:0042110 | T cell activation                              | 88/2279 | 483/18866 | 4.80E-05 | 0.0078549 | 0.0071074 | 88 | HLA-<br>DMB/IL27/PRKCZ/ZFPM1/LAT/FOXP1/FUT7/IL10/KIF13B/GSN/MAD1L1/PIK3CD/RHOH/LCK/MYB/RUNX1/SIRPB1/CD55/SLC11A1/TNFRSF1B/NLRP3/PIK3R1/ITPKB/CCR2/PIK3R6/SMAD3/LAX1/CCL5/GRAP2/NCK2/LOXL3/SFTPD/NFATC2/HSH2D/TNFSF13B/DUSP22/SEMA4A/ZBTB16/TGFBR2/MYH9/RAB27A/PTPN6/MIR27A/PREX1/SMAD7/TNFRSF21/ZMIZ1/DOCK8/LY9/CCR9/ZBTB7B/TIGIT/FANCA/RARA/RIPK3/LILRB4/ZC3H8/SP3/CCDC88B/PTPRC/CSK/RUNX2/BCL10/CLPTM1/SPTA1/PNP/NOD2/BCL2/DUSP3/IL18R1/SIRPG/NEDD4/HLX/CEBPB/RUNX3/CYLD/DOCK2/AP3D1/BCL3/SLC7A1/FADD/PELI1/JAML/TMEM131L/CYRIB/VSIR/MARCHF7/SLA2   |
| Biological Process | GO:0050863 | regulation of T cell activation                | 65/2279 | 332/18866 | 5.24E-05 | 0.0084323 | 0.0076298 | 65 | HLA-<br>DMB/IL27/PRKCZ/LAT/IL10/GSN/MAD1L1/RHOH/LCK/MYB/RUNX1/SIRPB1/CD55/TNFRSF1B/NLRP3/PIK3R1/ITPKB/CCR2/PIK3R6/LAX1/CCL5/GRAP2/NCK2/LOXL3/SFTPD/NFATC2/TNFSF13B/DUSP22/ZBTB16/TGFBR2/PTPN6/MIR27A/SMAD7/TNFRSF21/ZMIZ1/DOCK8/ZBTB7B/TIGIT/FANCA/RARA/RIPK3/LILRB4/ZC3H8/CCDC88B/PTPRC/CSK/BCL10/CLPTM1/SPTA1/PNP/NOD2/DUSP3/SIRPG/HLX/CEBPB/RUNX3/CYLD/AP3D1/SLC7A1/FADD/PELI1/TMEM131L/CYRIB/VSIR/MARCHF7                                                                                                                                         |
| Biological Process | GO:1903706 | regulation of hemopoiesis                      | 90/2279 | 498/18866 | 5.38E-05 | 0.0085216 | 0.0077107 | 90 | IL27/PRKCZ/ZFPM1/FOXP1/RHOH/CREB1/MIR145/MYB/RUNX1/CSF3R/INPP5D/ASH2L/NLRP3/PIK3R1/ITPKB/CCR2/PIK3R6/TNRC6B/PRKCA/TNF/UBASH3B/LOXL3/NFATC2/FBXO7/AGO1/TLR9/ZBTB16/TGFBR2/TESC/THBS1/BRD1/DLL1/RIPK1/ITGA2B/PTPN6/TCF12/SMAD7/HDAC1/ZMIZ1/MTURN/ZBTB7B/TGFB1/CD101/FANCA/PRKCB/KMT2D/RARA/TMEM178A/LILRB4/NF1/ZC3H8/PGLYRP1/CSF3/PTPRC/RARG/TMEM64/SETD1A/CLPTM1/PSMF1/MEIS2/GFI1B/CREBBP/LRRC17/ETS1/PNP/NFE2L2/PUS7/HOXA9/RB1/MEIS1/TCF3/PSMB7/NOTCH1/MEF2C/LTF/HLX/CEBPB/RUNX3/TRIB1/CYLD/AP3D1/KAT7/INHBA/LIF/FADD/PSMD13/PCID2/TMEM131L/VSIR/H3C1 |
| Biological Process | GO:0007265 | Ras protein signal transduction                | 67/2279 | 346/18866 | 5.76E-05 | 0.0089716 | 0.0081179 | 67 | KSR1/ARHGEF10/RREB1/TIMP2/LAT/KANK1/ELMO1/RHOH/DENND1A/AKAP13/MYO9B/ARHGDI1/ITPKB/DOK3/RAP1B/RHOG/ARRB1/PLD1/DNM2/GRAP2/DOK1/RCC1/DENND3/CUL3/CDC42EP1/LRRC59/DOK2/SYNPO2L/RASA3/PLEKHG5/SYNGAP1/NISCH/RERG/RAPGEF2/EPS8L3/IQSEC1/EPS8L1/NF1/ABCA1/BCR/ARHGEF25/NCKAP1/RALA/NTRK1/RB1/ARHGEF18/NOTCH1/DNMT1/GNA12/CYTH4/ARHGAP17/F2R/ARHGEF28/RAB30/FOXM1/ARHGEF2/GPR4/AGTR1/PDGFRB/ARHGAP1/RALGPS1/CYFIP1/FLOT1/FBXO8/DBNL/PRAG1/RIPOR1                                                                                                              |
| Biological Process | GO:0050764 | regulation of phagocytosis                     | 26/2279 | 97/18866  | 6.01E-05 | 0.0092067 | 0.0083306 | 26 | AZU1/PRTN3/ABR/CALR/PPARG/SIRPB1/SLC11A1/DNM2/RAB31/FGR/TNF/MYO18A/SFTPD/FPR2/LMAN2/RAB27A/SNX3/PTPRJ/CAMK1D/PTPRC/CSK/BCR/SIRPG/ANO6/DYSF/DOCK2                                                                                                                                                                                                                                                                                                                                                                                                      |
| Biological Process | GO:2001233 | regulation of apoptotic signaling pathway      | 77/2279 | 413/18866 | 6.40E-05 | 0.0096481 | 0.0087299 | 77 | TRIM39/S100A8/P4HB/ENO1/TFDP1/GSN/ITPRIP/LCK/URI1/YWHAH/PAM16/PLAGL2/BMF/SMAD3/CTTN/TNF/TRAF2/TNFAIP3/NCK2/TRAF1/DEDD2/UNC5B/THBS1/RRM2B/CTSH/RIPK1/GNAI2/NACC2/ZNF385A/TCF7L2/CLU/HDAC1/CIDEB/FGFR1/SGMS1/RIPK3/NF1/HTT/PTPRC/ITM2C/BMPR1B/STK3/BCL10/PPP2R1A/NOL3/MAPK8IP2/NFE2L2/TRPS1/ARRB2/ANKRD2/YWHAZ/FIS1/DAPK2/RB1/BCL2/PIH1D1/DNM1L/PPP2R1B/SP100/ARHGEF2/TP53BP2/BCL2L1/TNFSF12/CYLD/YWHAQ/RELA/G0S2/ING5/BAG5/GRINA/INHBA/CX3CR1/FADD/DAPK3/PRKN/MARCHF7/FBH1                                                                             |

|                    |            |                                                        |         |           |          |           |           |    |                                                                                                                                                                                                                                                                                                                                                                                                                                                                                                                |
|--------------------|------------|--------------------------------------------------------|---------|-----------|----------|-----------|-----------|----|----------------------------------------------------------------------------------------------------------------------------------------------------------------------------------------------------------------------------------------------------------------------------------------------------------------------------------------------------------------------------------------------------------------------------------------------------------------------------------------------------------------|
| Biological Process | GO:0071222 | cellular response to lipopolysaccharide                | 45/2279 | 208/18866 | 6.59E-05 | 0.0096638 | 0.0087442 | 45 | DEFA4/CEBPE/PDE4D/CTSG/IRF8/GFI1/SBNO2/IL10/LCN2/MIR140/CD55/TNFRSF1B/NLRP3/PRKCA/TNF/TNFAIP3/CCL5/ABCC2/SPON2/SCIMP/TGFB1/PABPN1/LITAF/SGMS1/LY86/RARA/TRIM5/ADAMTS13/PRPF8/CSF3/ABCA1/BCL10/BCR/IRAK2/NOD2/MEF2C/PRKCE/LTF/CASP1/CD68/CEBPB/TRIB1/ANKRD1/RELA/CX3CR1                                                                                                                                                                                                                                         |
| Biological Process | GO:0001819 | positive regulation of cytokine production             | 82/2279 | 447/18866 | 6.73E-05 | 0.0096638 | 0.0087442 | 82 | AZU1/ELANE/IL27/PRKCZ/NLRC4/PDE4D/ZFPM1/IRF8/SORL1/IL10/AIM2/IRF5/C3AR1/IL16/C1QTNF3/CREB1/CLEC9A/MIR145/MYB/RUNX1/SLC11A1/NLRP3/IL1R1/PIK3R1/SETD2/CCR2/SMAD3/FGR/TNF/TRAF2/POLR2F/TLR9/MNDA/CLEC5A/SPON2/CCM2L/THBS1/CRCP/RIPK1/CD226/APP/HLA-F/MBP/CLU/WNT11/DEFB124/SCIMP/LY9/TGFB1/PHB/ZNF580/PTPRJ/TIGIT/FCN1/RARA/CXCL17/CCDC88B/SEC14L1/SLC7A5/PTPRC/BCL10/IL6R/CREBBP/PLCB1/NOD2/POU2F2/IL18R1/DDX41/F2R/ARHGFE2/CASP1/CEBPB/CADM1/RELA/BCL3/FLOT1/NODAL/FADD/PELI1/STING1/CYRIB/STMP1                |
| Biological Process | GO:0008064 | regulation of actin polymerization or depolymerization | 42/2279 | 190/18866 | 6.79E-05 | 0.0096638 | 0.0087442 | 42 | VILL/TRIM27/SSH1/GSN/KANK1/CTTN/COTL1/CAPG/CYFIP2/NCK2/WHAMM/BAIAP2L1/CDC42EP1/BIN1/BAIAP2/SSH3/PREX1/WASL/FER/TMOD3/SVIL/PFN1/CSF3/GMFB/WDR1/SPTA1/NCKAP1/ADD1/AVIL/PRKCE/FLII/MYO1C/SPTAN1/TMOD1/CYFIP1/GMFG/BAIAP2L2/MYADM/SPTBN4/DBNL/PLEKHG2/CYRIB                                                                                                                                                                                                                                                        |
| Biological Process | GO:0002695 | negative regulation of leukocyte activation            | 41/2279 | 184/18866 | 6.81E-05 | 0.0096638 | 0.0087442 | 41 | ABR/IL10/MAD1L1/RUNX1/INPP5D/CCR2/FGR/LAX1/TNFAIP3/LOXL3/SFTPD/CD84/FBXO7/MNDA/DUSP22/HLA-F/PTPN6/MIR27A/SMAD7/TNFRSF21/ZBTB7B/FER/TIGIT/ZC3H8/BLK/PGLYRP1/PTPRC/GRN/BCR/CNR2/DUSP3/BANK1/HLX/CEBPB/RUNX3/TYRO3/INHBA/PELI1/TMEM131L/VSIR/MARCF7                                                                                                                                                                                                                                                               |
| Biological Process | GO:0046486 | glycerolipid metabolic process                         | 80/2279 | 434/18866 | 6.94E-05 | 0.0096694 | 0.0087492 | 80 | PNPLA2/CPNE6/OSBPL5/PLA2G15/SYNJ2/SORL1/MGLL/PCYT1A/PIK3CD/ACSL1/MFSD2A/INPP5A/VAC14/LPCAT1/PIP5K1B/INPP5D/LIPC/ABHD16A/PIK3R1/ITPKB/PIGL/PIK3R6/PIGU/PD1/GPLD1/CSF1R/FPR2/TTC7A/PIGN/PGP/ACP6/PITPNM2/SLC44A4/INPP4A/PIK3R5/PIP4K2A/PITPNM1/CPNE1/TTC7B/PGS1/DGKQ/SH3YL1/CHPT1/NR1H2/ATG14/PCTP/GNB3/PLEKHA2/PDGFB/ABHD16B/DGKA/DGKD/INPP5E/FABP6/PLCB1/CAT/OSBPL10/IMPA2/PI4K2A/PI4KA/PIGQ/PLA1A/AVIL/LMF1/ABHD5/PCK2/PDGFRB/RUFY1/CHKB/SREBF1/PTDSS2/CPT1A/INPP5F/LPIN1/CDS2/LYPLA2/AGPAT5/ETNK2/IP6K1/SLA2 |
| Biological Process | GO:1902105 | regulation of leukocyte differentiation                | 58/2279 | 290/18866 | 7.02E-05 | 0.0096694 | 0.0087492 | 58 | IL27/PRKCZ/ZFPM1/FOXP1/RHOH/CREB1/MIR145/MYB/RUNX1/INPP5D/NLRP3/PIK3R1/ITPKB/CCR2/PIK3R6/PRKCA/TNF/UBASH3B/LOXL3/NFATC2/FBXO7/TLR9/ZBTB16/TGFBR2/TEC/RIPK1/PTPN6/SMAD7/ZMIZ1/ZBTB7B/TGFB1/CD101/FANCA/RARA/TMEM178A/LILRB4/NF1/ZC3H8/PGLYRP1/PTPRC/TMEM64/CLPTM1/LRRC17/PNP/RB1/LTF/HLX/CEBPB/RUNX3/TRIB1/CYLD/AP3D1/INHBA/LIF/FADD/PCID2/TMEM131L/VSIR                                                                                                                                                        |
| Biological Process | GO:0030098 | lymphocyte differentiation                             | 70/2279 | 368/18866 | 7.13E-05 | 0.0096773 | 0.0087564 | 70 | HDAC4/IL27/PRKCZ/ZFPM1/FOXP1/FUT7/IL10/PIK3CD/RHOH/LCK/MYB/RUNX1/INPP5D/NLRP3/PIK3R1/ITPKB/CCR2/PIK3R6/LOXL3/LYL1/NFATC2/FBXO7/TLR9/SEMA4A/ZBTB16/TGFB2/DLL1/RBPJ/PTPN6/PREX1/SMAD7/ZMIZ1/LY9/CCR9/ZBTB7B/PTPRJ/FANCA/RARA/RIPK3/LILRB4/CD79A/ZC3H8/SP3/PGLYRP1/CMTM7/PTPRC/RUNX2/CLPTM1/PNP/DOCK10/NTRK1/POU2F2/BCL2/TCF3/IL18R1/HLX/RUNX3/HHEX/CYLD/DOCK2/AP3D1/TYRO3/BCL3/KAT7/INHBA/FADD/PCID2/ADGRG3/TMEM131L/VSIR                                                                                        |
| Biological Process | GO:0050817 | coagulation                                            | 67/2279 | 349/18866 | 7.57E-05 | 0.0099225 | 0.0089783 | 67 | PRTN3/ZFPM1/EHD1/GP9/SERPINA1/PLAU/CD9/ENTPD1/ITPR2/LCK/DOCK6/CD177/PRKAR1B/DOCK1/PIK3R1/PIK3R6/PABPC4/ARRB1/PRKCA/UBASH3B/MICAL1/MYL12A/SERPINB2/ITPR1/THBS1/MYH9/RAB27A/PIK3R5/ITGA2B/PTPN6/ILK/HDAC1/DOCK8/F12/PRKCH/DGKQ/PRKCB/HBB/ADAMTS13/BLK/CD59/VAV2/GNA11/ITGB3/ACTG1/PDGFB/DGKA/DGKD/NFE2L2/ARRB2/PAPSS2/YWHAZ/GNG2/P2RX1/PRKCE/GNA12/CPB2/F2R/ANO6/HPS6/TYRO3/IRF2/ADTRP/P2RX5/DTNBP1/VAV3/H3C1                                                                                                    |
| Biological Process | GO:0030832 | regulation of actin filament length                    | 42/2279 | 191/18866 | 7.70E-05 | 0.0099225 | 0.0089783 | 42 | VILL/TRIM27/SSH1/GSN/KANK1/CTTN/COTL1/CAPG/CYFIP2/NCK2/WHAMM/BAIAP2L1/CDC42EP1/BIN1/BAIAP2/SSH3/PREX1/WASL/FER/TMOD3/SVIL/PFN1/CSF3/GMFB/WDR1/SPTA1/NCKAP1/ADD1/AVIL/PRKCE/FLII/MYO1C/SPTAN1/TMOD1/CYFIP1/GMFG/BAIAP2L2/MYADM/SPTBN4/DBNL/PLEKHG2/CYRIB                                                                                                                                                                                                                                                        |



|                    |            |                                                   |         |           |          |           |           |    |                                                                                                                                                                                                                                                                                                                                                                                                                                                                                                                |
|--------------------|------------|---------------------------------------------------|---------|-----------|----------|-----------|-----------|----|----------------------------------------------------------------------------------------------------------------------------------------------------------------------------------------------------------------------------------------------------------------------------------------------------------------------------------------------------------------------------------------------------------------------------------------------------------------------------------------------------------------|
| Biological Process | GO:0043254 | regulation of protein-containing complex assembly | 82/2279 | 449/18866 | 7.87E-05 | 0.0099225 | 0.0089783 | 82 | VILL/PRKCZ/TRIM27/TBCD/DCTN1/SORL1/SPIDR/SSH1/GSN/KANK1/CREB1/ULK1/RAP1B/BMF/CTTN/LDLRAD4/MEFV/TNF/COTL1/TRAF2/CAPG/CYFIP2/NCK2/WHAMM/BAIAP2L1/NAV3/CDC42EP1/BIN1/BAIAP2/SSH3/PREX1/CLU/ASAP1/WASL/TGFB1/FER/TMOD3/SVIL/PFN1/VPS18/JAM3/NR1H2/CSF3/GMFB/ATF7IP/ABCA1/NUMA1/GFAP/ZDHC1/SPTA1/FNIP2/NCKAP1/ADD1/RB1/MPP7/PIH1D1/MED25/AVIL/TPPP3/PRKCE/FLII/ARHGEF2/MYO1C/ERCC1/SPTAN1/TMOD1/CYFIP1/GMFG/BAIAP2L2/LMO4/XPA/MYADM/SPTBN4/ERCC2/EIF4G1/DBNL/PLEKHG2/SVIP/TFIP11/CYRIB/STMP1/SLF1                   |
| Biological Process | GO:0002237 | response to molecule of bacterial origin          | 68/2279 | 356/18866 | 7.88E-05 | 0.0099225 | 0.0089783 | 68 | DEFA4/ELANE/CEBPE/SLPI/PDE4D/S100A8/CTSG/IRF8/GFI1/ABR/MPO/FOXP1/SBNO2/IL10/IRF5/CSF2RB/LCN2/MIR140/CD55/SLC11A1/TNFRSF1B/NLRP3/GGT1/PRKCA/TNF/TNFAIP3/CCL5/TLR9/ABCC2/SPON2/COMT/ALPL/DEFB124/SCIMP/TGFB1/PABPN1/FER/LITAF/SGMS1/LY86/RARA/TRIM5/ADAMTS13/PRPF8/CSF3/ABCA1/BCL10/MGST2/BCR/CNR2/IRAK2/NOD2/NOTCH1/MEF2C/PRKCE/F2R/LTF/CASP1/CD68/CEBPB/MAPKAPK3/TRIB1/ANKRD1/CD96/RELA/CX3CR1/PEL1/CYRIB                                                                                                      |
| Biological Process | GO:0006650 | glycerophospholipid metabolic process             | 66/2279 | 343/18866 | 7.94E-05 | 0.0099225 | 0.0089783 | 66 | CPNE6/OSBPL5/PLA2G15/SYNJ2/PCYT1A/PIK3CD/MFSD2A/INPP5A/VAC14/LPCAT1/PIP5K1B/INPP5D/LIPC/ABHD16A/PIK3R1/ITPKB/PIGL/PIK3R6/PIGU/PLD1/GPLD1/CSF1R/FPR2/TTC7A/PIGN/PGP/ACPF6/PITPNM2/SLC44A4/INPP4A/PIK3R5/PIP4K2A/PITPNM1/CPNE1/TTC7B/PGS1/DGKQ/SH3YL1/CHPT1/NR1H2/PCTP/PLEKHA2/PDGFB/ABHD16B/DGKA/DGKD/INPP5E/PLCB1/OSBPL10/IMPA2/PI4K2A/PI4KA/PIGQ/PLA1A/ABHD5/PDGFRB/RUFY1/CHKB/PTDSS2/INPP5F/LPIN1/CDS2/AGPAT5/ETNK2/IP6K1/SLA2                                                                               |
| Biological Process | GO:0019932 | second-messenger-mediated signaling               | 83/2279 | 456/18866 | 8.04E-05 | 0.0099225 | 0.0089783 | 83 | AZU1/HDAC4/TRPM2/KSR1/PDE4D/LAT/MGRN1/ADCY2/CASQ2/ITPR2/INPP5A/CACNA1C/AKAP13/PRKAR1B/ADCY9/CCR2/SLC8A1/PRKCA/TNF/FPR2/FPR1/NFATC2/ITPR1/CAMKK2/NFATC1/ACKR2/THBS1/JSRP1/GNAI2/NOS1AP/CAMTA1/MRAP/RCAN1/CRTC3/P2RY6/CCR9/PTPRJ/RAPGEF2/HRH1/DGKQ/AQP1/MCTP2/DEFB1/MYO5A/DYRK2/GIPR/HTT/CCL20/PTPRC/CXCR1/ABCA1/PDGFB/PPP2R1A/DGKD/CNR2/TPCN2/PDE9A/ADCY4/SAMD14/FIS1/S1PR2/GSTO1/GNG2/LPAR2/FHL2/NPPC/S1PR4/GPR4/AGTR1/ANK2/CHERP/PDE3B/PLCG1/P2RX5/NR5A2/CASQ1/CX3CR1/PRKAA1/IRAG1/ADGRG3/STIMATE/SLA2/ADGRE3 |
| Biological Process | GO:0071219 | cellular response to molecule of bacterial origin | 47/2279 | 222/18866 | 8.04E-05 | 0.0099225 | 0.0089783 | 47 | DEFA4/CEBPE/PDE4D/CTSG/IRF8/GFI1/SBNO2/IL10/LCN2/MIR140/CD55/TNFRSF1B/NLRP3/PRKCA/TNF/TNFAIP3/CCL5/ABCC2/SPON2/DEFB124/SCIMP/TGFB1/PABPN1/LITAF/SGMS1/LY86/RARA/TRIM5/ADAMTS13/PRPF8/CSF3/ABCA1/BCL10/BCR/IRAK2/NOD2/MEF2C/PRKCE/LTF/CASP1/CD68/CEBPB/TRIB1/ANKRD1/RELA/CX3CR1/CYRIB                                                                                                                                                                                                                           |
| Biological Process | GO:0045123 | cellular extravasation                            | 20/2279 | 67/18866  | 8.25E-05 | 0.0100463 | 0.0090902 | 20 | AZU1/ELANE/FUT4/PRTN3/ABR/FUT7/PIK3CD/CD177/IL1R1/CCR2/TNF/FER/RIPK3/PDGFD/BCR/PLCB1/ITGB2/CX3CR1/FADD/JAML                                                                                                                                                                                                                                                                                                                                                                                                    |
| Biological Process | GO:0060348 | bone development                                  | 44/2279 | 204/18866 | 8.51E-05 | 0.0102336 | 0.0092598 | 44 | CSGALNACT1/ZFPM1/FOXP1/SLC38A10/FOXN3/MEF2D/LRP5L/FLI1/AKAP13/SKI/CHSY1/ANKRD11/ANXA6/SH3PXD2B/TGFB2/ALPL/PIP4K2A/PTPN6/ZNF385A/POC1A/XYL1/SEMA4D/RARA/POR/LRRK1/GHRL/PTPRC/RARG/BMPR1B/RUNX2/LRRC17/ENG/PAPSS2/MEIS1/MEF2C/PDGFC/NPPC/LTF/ANO6/FAM20C/RFLNA/P3H1/NSD2/CCN4                                                                                                                                                                                                                                    |
| Biological Process | GO:0006900 | vesicle budding from membrane                     | 28/2279 | 110/18866 | 8.64E-05 | 0.0102553 | 0.0092794 | 28 | CTSZ/SERPINA1/TGFA/STX5/CSNK1D/DNM2/TRAPPC10/SEC23B/MYO18A/CUL3/TRAPPC9/SNX3/MIA3/WASL/CNIH2/CD59/SEC13/ANKRD28/PRKCI/DNM1/SEC24C/DNM3/TMED2/AP3D1/MX1/SEC31A/PRKN/TRAPPC2                                                                                                                                                                                                                                                                                                                                     |
| Biological Process | GO:1900027 | regulation of ruffle assembly                     | 12/2279 | 30/18866  | 9.94E-05 | 0.0116567 | 0.0105474 | 12 | TACSTD2/DEF8/KANK1/RHOG/SH3YL1/EPS8L3/EPS8L1/PFN1/PLEKHM1/CORO1C/CYFIP1/NDEL1                                                                                                                                                                                                                                                                                                                                                                                                                                  |

|                    |            |                                                   |         |           |           |           |           |    |                                                                                                                                                                                                                                                                                                                                                                                   |
|--------------------|------------|---------------------------------------------------|---------|-----------|-----------|-----------|-----------|----|-----------------------------------------------------------------------------------------------------------------------------------------------------------------------------------------------------------------------------------------------------------------------------------------------------------------------------------------------------------------------------------|
| Biological Process | GO:0032496 | response to lipopolysaccharide                    | 64/2279 | 334/18866 | 0.0001146 | 0.0132739 | 0.0120107 | 64 | DEFA4/ELANE/CEBPE/SLPI/PDE4D/S100A8/CTSG/IRF8/GFI1/ABR/MPO/FOXP1/SBNO2/IL10/CSF2RB/LCN2/MIR140/CD55/SLC11A1/TNFRSF1B/NLRP3/GGT1/PRKCA/TNF/TNFAIP3/CCL5/ABCC2/SPON2/COMT/ALPL/SCIMP/TGFB1/PABPN1/FER/LITAF/SGMS1/LY86/RARA/TRIM5/ADAMTS13/PRPF8/CSF3/ABCA1/BCL10/MGST2/BCR/CNR2/IRAK2/NOD2/NOTCH1/MEF2C/PRKCE/F2R/LTF/CASP1/CD68/CEBPB/MAPKAPK3/TRIB1/ANKRD1/CD96/RELA/CX3CR1/PEL1 |
| Biological Process | GO:0050866 | negative regulation of cell activation            | 44/2279 | 207/18866 | 0.0001213 | 0.0138652 | 0.0125457 | 44 | ABR/IL10/CD9/MAD1L1/RUNX1/INPP5D/CCR2/FGR/LAX1/UBASH3B/TNFAIP3/LOXL3/SFTPD/CD84/FBXO7/MNDA/DUSP22/HLA-F/PTPN6/MIR27A/SMAD7/TNFRSF21/ZBTB7B/FER/TIGIT/ZC3H8/BLK/PGLYRP1/PTPRC/GRN/PDGFB/BCR/CNR2/DUSP3/BANK1/HLX/CEBPB/RUNX3/TYRO3/INHBA/PEL1/TMEM131L/V SIR/MARCH7                                                                                                                |
| Biological Process | GO:0045017 | glycerolipid biosynthetic process                 | 54/2279 | 270/18866 | 0.0001226 | 0.0138652 | 0.0125457 | 54 | PNPLA2/CPNE6/PLA2G15/SYNJ2/PCYT1A/PIK3CD/ACSL1/MFSD2A/VAC14/LPCAT1/PIP5K1B/INPP5D/PIK3R1/PIGL/PIK3R6/PIGU/PLD1/GPLD1/FPR2/PIGN/ACP6/PITPNM2/SLC44A4/INPP4A/PIK3R5/PIP4K2A/PITPNM1/CPNE1/PGS1/DGKQ/SH3YL1/CHPT1/NR1H2/PCTP/PLEKHA2/PDGFB/DGKA/DGKD/INPP5E/PI4K2A/PI4KA/PIGQ/AVIL/ABHD5/PCK2/RUFY1/CHKB/SREBF1/PTDSS2/INPP5F/LPIN1/CDS2/AGPAT5/ETNK2                                |
| Biological Process | GO:0045651 | positive regulation of macrophage differentiation | 8/2279  | 15/18866  | 0.0001312 | 0.0146609 | 0.0132657 | 8  | MIR145/PRKCA/RIPK1/TGFB1/RB1/TRIB1/LIF/FADD                                                                                                                                                                                                                                                                                                                                       |
| Biological Process | GO:0008654 | phospholipid biosynthetic process                 | 54/2279 | 271/18866 | 0.0001354 | 0.0149627 | 0.0135388 | 54 | CPNE6/SYNJ2/PCYT1A/PIK3CD/SPTLC2/MFSD2A/IDI1/HEXB/VAC14/LPCAT1/PIP5K1B/INPP5D/PIK3R1/PIGL/PIK3R6/PIGU/PLD1/FPR2/PIGN/ACP6/PITPNM2/SLC44A4/INPP4A/PIK3R5/PIP4K2A/PITPNM1/CPNE1/SPHK2/SGMS1/PGS1/DGKQ/SH3YL1/CHPT1/PCTP/PLEKHA2/PDGFB/DGKA/DGKD/INPP5E/SGMS2/PI4K2A/PI4KA/PIGQ/ABHD5/RUFY1/CHKB/HMGCS1/PTDSS2/INPP5F/LPIN1/CDS2/DPAGT1/AGPAT5/ETNK2                                 |
| Biological Process | GO:0071216 | cellular response to biotic stimulus              | 50/2279 | 246/18866 | 0.0001422 | 0.0155333 | 0.0140551 | 50 | DEFA4/CEBPE/PDE4D/CTSG/IRF8/GFI1/SBNO2/IL10/LCN2/MIR140/CD55/TNFRSF1B/NLRP3/PRKCA/TNF/TNFAIP3/CCL5/ABCC2/SPON2/EME1/DEFB124/SCIMP/TGFB1/PABPN1/LITAF/SGMS1/LY86/RARA/TRIM5/ADAMTS13/PRPF8/CSF3/ABCA1/BCL10/BCR/IRAK2/NOD2/MEF2C/PRKCE/LTF/CASP1/CD68/CEBPB/TRIB1/ANKRD1/SLX4/RELA/CX3CR1/CYRIB/FBH1                                                                               |
| Biological Process | GO:0014065 | phosphatidylinositol 3-kinase signaling           | 35/2279 | 154/18866 | 0.0001489 | 0.0158958 | 0.0143831 | 35 | PIK3CD/PRR5L/PIP5K1B/ANGPT1/PIK3AP1/PIK3R1/FGR/TNF/CCL5/UNC5B/PIK3R5/PIP4K2A/PTPN6/IGF1R/FLT1/FGFR1/SEMA4D/PPP2R5C/NF1/PDGFD/PRR5/CSF3/PDGFB/INPP5E/CAT/NTRK1/F2R/UBE3A/PDGFC/NEDD4/TSC2/PDGFRB/PPP1R16B/TYRO3/KBTBD2                                                                                                                                                             |
| Biological Process | GO:0006022 | aminoglycan metabolic process                     | 38/2279 | 172/18866 | 0.0001489 | 0.0158958 | 0.0143831 | 38 | CSGALNACT1/AP2A1/SPOCK2/HS3ST3B1/DSE/HEXB/CHI3L1/GALNS/ANGPT1/CHSY1/CHST11/LYG2/CHIT1/CHST15/NDST1/CHST2/EGFLAM/SDC2/XYL1/TGFB1/STAB2/B4GALT7/PGLYRP1/PDGFB/ST3GAL4/B4GALT3/LYVE1/ARSB/GCNT2/PDGFRB/CHI3L2/PGLYRP4/HAS3/ST3GAL2/B3GNT2/B4GAT1/CEMIP2/PXYLP1                                                                                                                       |
| Biological Process | GO:0019722 | calcium-mediated signaling                        | 46/2279 | 222/18866 | 0.0001618 | 0.0170813 | 0.0154558 | 46 | AZU1/HDAC4/TRPM2/PDE4D/LAT/CASQ2/CACNA1C/CCR2/SLC8A1/TNF/FPR2/NFATC2/ITPR1/CAMKK2/NFATC1/ACKR2/JSRP1/CAMTA1/RCAN1/P2RY6/CCR9/PTPRJ/MCTP2/DEFB1/MYO5A/DYRK2/HTT/CCL20/PTPRC/CXCR1/TPCN2/SAMD14/FIS1/GSTO1/FHL2/AGTR1/ANK2/CHERP/PLCG1/P2RX5/NR5A2/CASQ1/CX3CR1/PRKAA1/STIMATE/SLA2                                                                                                 |

|                    |            |                                                                   |         |           |           |           |           |    |                                                                                                                                                                                                                                                                                                                                                                                                                           |
|--------------------|------------|-------------------------------------------------------------------|---------|-----------|-----------|-----------|-----------|----|---------------------------------------------------------------------------------------------------------------------------------------------------------------------------------------------------------------------------------------------------------------------------------------------------------------------------------------------------------------------------------------------------------------------------|
| Biological Process | GO:0045444 | fat cell differentiation                                          | 48/2279 | 235/18866 | 0.0001692 | 0.0174728 | 0.01581   | 48 | LRG1/ARID5B/ZFPM1/RREB1/ZNF516/CEBPD/TRIO/PPARG/C1QTNF3/CREB1/SMAD3/TNF/SH3PXD2B/ZBTB16/ZNF385A/TCF7L2/LRRC8C/ZBTB7B/TGFB1/GRK5/CTBP1/TGFB11/WWT<br>R1/CTBP2/TMEM64/WNT5B/STK3/GNB3/PLCB1/FTO/AAMDC/SORT1/ARNTL/PRDM16/PER2/CEBPB/FOXO1/DYSF/GDF6/SREBF1/LAMB3/NOC3L/ZADH2/MB/BSCL2/ANGPTL8/TLCD3B<br>/CCN4                                                                                                               |
| Biological Process | GO:1903039 | positive regulation of leukocyte cell-cell adhesion               | 48/2279 | 235/18866 | 0.0001692 | 0.0174728 | 0.01581   | 48 | ELANE/FUT4/HLA-<br>DMB/PRKCZ/FUT7/RHOH/LCK/MYB/RUNX1/SIRPB1/CD55/NLRP3/PIK3R1/ITPKB/CCR2/PIK3R6/TNF/CCL5/GRAP2/NCK2/TNFSF13B/ZBTB16/TGFBR2/PTPN6/ZMIZ1/DOCK8/ZBTB7B/RA<br>RA/LILRB4/CCDC88B/PTPRC/CSK/BCL10/SPTA1/ETS1/PNP/ITGB2/NOD2/SIRPG/HLX/RUNX3/CYLD/AP3D1/RELA/SLC7A1/FADD/CYRIB/VSIR                                                                                                                              |
| Biological Process | GO:0031589 | cell-substrate adhesion                                           | 67/2279 | 359/18866 | 0.0001798 | 0.0183723 | 0.0166239 | 67 | PRKCZ/TBCD/P4HB/RREB1/TACSTD2/PARVB/CALR/PLAU/SPOCK2/COL17A1/VIT/KANK1/RIN2/ANGPT1/DOCK1/ITGB1BP1/PIK3R1/CEACAM6/SMAD3/ARHGEF7/CTTN/DNM2/EPHB3/D<br>USP22/WHAMM/JUP/THBS1/DISC1/NINJ1/ACTN1/ITGA2B/EGFLAM/ACTN4/ILK/PREX1/PXN/ITGB5/PPFIA1/FER/PTPRJ/NF1/ADAMTS13/JAM3/TESK2/OLFM4/ITGB3/ACTG1/PLEKHA2/<br>BCR/CASS4/ITGB2/LYVE1/BCL2/LYPD5/NOTCH1/CORO1C/PARVG/GCNT2/DUSP3/PRKCE/RSU1/TYRO3/CD96/LAMB3/ITGB6/MYADM/DAPK3 |
| Biological Process | GO:0002703 | regulation of leukocyte mediated immunity                         | 44/2279 | 211/18866 | 0.0001912 | 0.0193256 | 0.0174865 | 44 | PRKCZ/ABR/FUT7/IL10/CD177/TNFRSF1B/NLRP3/IL1R1/CCR2/PIK3R6/GAB2/FGR/TNF/TRAF2/CD84/DUSP22/CD226/HLA-<br>F/PTPN6/SMAD7/SCIMP/SPHK2/TGFB1/FER/NCR1/RIPK3/BLK/PTPRC/BCR/ARRB2/ITGB2/IL18RAP/DNASE1L3/NOD2/TP53BP1/PRAM1/IL18R1/TNFSF13/CADM1/CD96/FADD/PAXIP1/<br>CYRIB/NSD2                                                                                                                                                 |
| Biological Process | GO:0046777 | protein autophosphorylation                                       | 48/2279 | 237/18866 | 0.0002086 | 0.0207058 | 0.0187354 | 48 | AATK/LMTK2/MARK3/VRK2/MAP3K3/LCK/ULK1/ERN1/AAK1/FGR/CSF1R/EPHB3/CAMKK2/TNIK/SLA/RIPK1/IGF1R/FLT1/FGFR1/FER/CLK3/PPP2R5C/GRK5/RIPK3/STK24/PDGFD/BLK/P<br>TPRC/CSK/PDGFB/BCR/MKNK1/ENG/TAOK3/PPP2R5E/PPP2R5D/NEK6/NTRK1/INSRR/DAPK2/GRK7/PDGFC/CHEK2/MAPKAP3/PDGFRB/TYRO3/MARK2/DAPK3                                                                                                                                       |
| Biological Process | GO:0003332 | negative regulation of extracellular matrix constituent secretion | 4/2279  | 4/18866   | 0.0002124 | 0.0207058 | 0.0187354 | 4  | TNFRSF1B/TNFRSF1A/NOTCH1/ADTRP                                                                                                                                                                                                                                                                                                                                                                                            |
| Biological Process | GO:0010761 | fibroblast migration                                              | 15/2279 | 46/18866  | 0.0002126 | 0.0207058 | 0.0187354 | 15 | ARID5B/PRR5L/MIR145/ITGB1BP1/SLC8A1/ARHGEF7/THBS1/TNS1/ILK/TGFB1/FER/MTA2/CORO1C/PRKCE/GNA12                                                                                                                                                                                                                                                                                                                              |
| Biological Process | GO:0002685 | regulation of leukocyte migration                                 | 44/2279 | 212/18866 | 0.0002136 | 0.0207058 | 0.0187354 | 44 | ELANE/FUT4/ABR/CALR/FUT7/CD9/C3AR1/RHOH/IL1R1/CCR2/RHOG/TNF/CCL5/CSF1R/FPR2/PADI2/THBS1/C5AR2/APP/ITGA2B/MIR24-<br>2/MIA3/DEFB124/DOCK8/WASL/ZNF580/RIPK3/PDGFD/JAM3/CAMK1D/CXCL17/CCL20/IL6R/C10orf99/BCR/PLCB1/DAPK2/DNM1L/ANO6/DYSF/ADTRP/CCL27/CX3CR1/FADD                                                                                                                                                            |
| Biological Process | GO:0045637 | regulation of myeloid cell differentiation                        | 52/2279 | 263/18866 | 0.000218  | 0.0208659 | 0.0188802 | 52 | ZFPM1/FOXP1/CREB1/MIR145/RUNX1/CSF3R/INPP5D/ASH2L/PIK3R1/ITPKB/TNRC6B/PRKCA/TNF/UBASH3B/AGO1/ZBTB16/TESC/THBS1/BRD1/DLL1/RIPK1/ITGA2B/HDAC1/MTURN/T<br>GFB1/CD101/PRKCB/KMT2D/RARA/TMEM178A/LILRB4/NF1/CSF3/RARG/TMEM64/SETD1A/MEIS2/CREBBP/LRRC17/ETS1/HOXA9/RB1/MEIS1/MEF2C/LTF/CEBPB/TRIB1/KAT7/INHBA/<br>LIF/FADD/H3C1                                                                                                |

|                    |            |                                                           |         |           |           |           |           |    |                                                                                                                                                                                                                                                                                                                                                                                                                                                                            |
|--------------------|------------|-----------------------------------------------------------|---------|-----------|-----------|-----------|-----------|----|----------------------------------------------------------------------------------------------------------------------------------------------------------------------------------------------------------------------------------------------------------------------------------------------------------------------------------------------------------------------------------------------------------------------------------------------------------------------------|
| Biological Process | GO:0006888 | endoplasmic reticulum to Golgi vesicle-mediated transport | 43/2279 | 206/18866 | 0.0002196 | 0.0208659 | 0.0188802 | 43 | CTSZ/DCTN1/SORL1/SERPINA1/TGFA/STX5/VTI1A/CSNK1D/CD55/TRAPPC10/SEC23B/DYNC1H1/LMAN2/WHAMM/YIF1A/CUL3/TRAPPC9/ERGIC1/MIA3/COG1/DCTN2/CNIH2/SEC22C/CD59/TRAPPC3L/COG8/SEC13/CREB3L2/SPTA1/ANKRD28/SEC24C/CNIH4/COG5/LMF1/TMED2/SPTAN1/ANK2/SPTBN4/SEC31A/TEX261/TRAPPC2B/MIA2/TRAPPC2                                                                                                                                                                                        |
| Biological Process | GO:0006909 | phagocytosis                                              | 70/2279 | 382/18866 | 0.0002291 | 0.0215484 | 0.0194977 | 70 | AZU1/ELANE/CEBPE/PRTN3/IRF8/ABR/CALR/PPARG/GSN/ELMO1/TM9SF4/RHOH/SIRPB1/LYST/SLC11A1/DOCK1/PIK3R1/NCF4/CCR2/RHOG/WIPF1/DNM2/RAB31/FGR/TNF/CYFIP2/MYO18A/SFTPD/FPR2/LMAN2/IGHV6-1/SPON2/THBS1/MYH9/BAIAP2/RAB27A/SNX3/COLEC12/NCF2/P2RY6/WASL/MARCO/PTPRJ/RHOBTB2/FCN1/RARA/CAMK1D/VAV2/ITGB3/PTPRC/ACTG1/CSK/ABCA1/BCR/ARHGAP25/ITGB2/NCKAP1/CORO1C/PRKCE/SIRPG/MYO1C/ANO6/DYSF/ICAM5/DOCK2/TYRO3/ARHGAP12/PLCG1/CYFIP1/VAV3                                               |
| Biological Process | GO:0010634 | positive regulation of epithelial cell migration          | 38/2279 | 176/18866 | 0.0002446 | 0.0225824 | 0.0204333 | 38 | RREB1/FOXP1/CALR/NRP2/MAP3K3/MIR143/RIN2/HDAC7/ANGPT1/DOCK1/ITGB1BP1/PRKCA/MIR199A1/GPLD1/MIR101-2/STAT5A/RTN4/TGFBR2/THBS1/CTSH/AKT3/MIR27A/MIR23A/FGFR1/TGFB1/ZNF580/IQSEC1/PFN1/ITGB3/GRN/PDGFB/ETS1/NFE2L2/MIR199A2/PRKCE/PLCG1/ADGRA2/PLPP3                                                                                                                                                                                                                           |
| Biological Process | GO:0061515 | myeloid cell development                                  | 20/2279 | 72/18866  | 0.0002448 | 0.0225824 | 0.0204333 | 20 | MAEA/ZFPM1/FOXP1/FLI1/PABPC4/SLC11A2/BRD1/PIP4K2A/APP/PTPN6/ZNF385A/TMOD3/LRRK1/ALAS1/MEIS1/TSPAN2/LTF/FAM20C/EPB42/ERCC2                                                                                                                                                                                                                                                                                                                                                  |
| Biological Process | GO:0046718 | viral entry into host cell                                | 31/2279 | 134/18866 | 0.0002479 | 0.0226464 | 0.0204913 | 31 | TRIM27/P4HB/TRIM38/GSN/TRIM8/WWP2/SLC10A1/CD55/TRIM10/SLC1A5/CLEC5A/SNX3/UVRAG/ITGB5/PHB/FCN1/TRIM5/VPS18/ITGB3/CTSB/TPCN2/NPC1/SLC52A2/EPS15/TYRO3/ITGB6/SIVA1/TRIM26/GRK2/NECTIN1/NECTIN4                                                                                                                                                                                                                                                                                |
| Biological Process | GO:0030203 | glycosaminoglycan metabolic process                       | 35/2279 | 158/18866 | 0.0002522 | 0.0228249 | 0.0206528 | 35 | CSGALNACT1/AP2A1/SPOCK2/HS3ST3B1/DSE/HEXB/GALNS/ANGPT1/CHSY1/CHST11/LYG2/CHST15/NDST1/CHST2/EGFLAM/SDC2/XYL1/TGFB1/STAB2/B4GALT7/PGLYRP1/PDGFB/ST3GAL4/B4GALT3/LYVE1/ARSB/GCNT2/PDGFRB/PGLYRP4/HAS3/ST3GAL2/B3GNT2/B4GAT1/CEMIP2/PXYLP1                                                                                                                                                                                                                                    |
| Biological Process | GO:0032332 | positive regulation of chondrocyte differentiation        | 9/2279  | 20/18866  | 0.0002592 | 0.0231832 | 0.020977  | 9  | SMAD3/ZBTB16/SMAD7/POR/BMP1B/RUNX2/GDF6/RELA/ZNF219                                                                                                                                                                                                                                                                                                                                                                                                                        |
| Biological Process | GO:0019216 | regulation of lipid metabolic process                     | 77/2279 | 431/18866 | 0.0002611 | 0.0231832 | 0.020977  | 77 | PNPLA2/PRKAG2/GFI1/RXRA/SORL1/PPARG/NCOR2/ACSL1/CREB1/MFSD2A/IDI1/LPCAT1/SIN3B/OPA3/VDR/PIK3R1/PIK3R6/MBTPS1/GPLD1/FGR/TNF/ORMDL3/ABCG1/FPR2/PIK3R5/MIR27A/TNFRSF1A/TNFRSF21/CRTC3/FLT1/SPHK2/TGFB1/ACADM/RDH10/DGKQ/SF1/POR/NR1H2/VAV2/ATG14/ALAS1/ABCA1/NCOA1/GNB3/ACACB/PDGFB/CREBBP/MIR138-2/NOD2/CHD9/RB1/ACACA/AVIL/FHL2/PRKCE/LMF1/ABHD5/AGTR1/PDGFRB/WDR81/NCOA2/ANKRD1/HMGCS1/SCD/SREBF1/PDE3B/WBTC1/CPT1A/GOS2/SIRT3/VAV3/ACADVL/BCL2/PRKAA1/ANGPTL8/RUBCNL/SLA2 |
| Biological Process | GO:0018107 | peptidyl-threonine phosphorylation                        | 28/2279 | 117/18866 | 0.0002673 | 0.0235117 | 0.0212742 | 28 | AZU1/RPTOR/SPRED2/PRKAG2/LMTK2/DYRK4/TNKS/ULK1/CHI3L1/HIPK3/PRKCA/HIPK2/TGFBR2/APP/SMAD7/TGFB1/DGKQ/PRKCB/AXIN1/DYRK2/CAB39/PPP2R5D/BCL2/S1PR2/CDC42BPB/MARK2/EIF4G1/GRK2                                                                                                                                                                                                                                                                                                  |

|                    |            |                                                           |         |           |           |           |           |    |                                                                                                                                                                                                                                                                                                                                                                                                                                                                                                                                       |
|--------------------|------------|-----------------------------------------------------------|---------|-----------|-----------|-----------|-----------|----|---------------------------------------------------------------------------------------------------------------------------------------------------------------------------------------------------------------------------------------------------------------------------------------------------------------------------------------------------------------------------------------------------------------------------------------------------------------------------------------------------------------------------------------|
| Biological Process | GO:0070534 | protein K63-linked ubiquitination                         | 17/2279 | 57/18866  | 0.000279  | 0.024321  | 0.0220065 | 17 | TRIM27/WWP2/TRAF2/TRAF1/UBE2O/OTUB2/TRIM5/UBE2V1/MIR138-2/OTUB1/NOD2/TRAF3IP2/NEDD4/TRIP12/PARP10/PELI1/PRKN                                                                                                                                                                                                                                                                                                                                                                                                                          |
| Biological Process | GO:1902107 | positive regulation of leukocyte differentiation          | 35/2279 | 159/18866 | 0.0002865 | 0.0247474 | 0.0223923 | 35 | PRKCZ/RHOH/CREB1/MIR145/MYB/RUNX1/INPP5D/NLRP3/ITPKB/PIK3R6/PRKCA/TNF/ZBTB16/TGFBR2/TESC/RIPK1/ZMIZ1/ZBTB7B/TGFB1/CD101/RARA/LILRB4/PTPRC/TMEM64/PNP/RB1/HLX/RUNX3/TRIB1/CYLD/AP3D1/LIF/FADD/PCID2/VSIR                                                                                                                                                                                                                                                                                                                               |
| Biological Process | GO:0031638 | zymogen activation                                        | 17/2279 | 58/18866  | 0.0003508 | 0.0297638 | 0.0269314 | 17 | CTS2/NLRC4/ENO1/PLAU/GGT1/CYFIP2/TBC1D10A/THBS1/CTSH/CIDEB/F12/PERP/CPB2/ASPH/FADD/C1RL/VSIR                                                                                                                                                                                                                                                                                                                                                                                                                                          |
| Biological Process | GO:0033673 | negative regulation of kinase activity                    | 52/2279 | 268/18866 | 0.0003509 | 0.0297638 | 0.0269314 | 52 | TRIM27/RPTOR/SPRED2/PRKAG2/SORL1/SH3BP5L/ITPRIP/RHOH/PPP1R1B/HIPK3/PRKAR1B/ITGB1BP1/DUSP14/SLC8A1/LAX1/UBASH3B/TNFAIP3/FBXO7/SH3BP5/DUSP22/TESC/SMYD3/PTPN6/MIR24-2/ILK/PRKRIP1/IGF1R/LATS2/PTPRJ/NF1/MLLT1/GMFB/WWTR1/PTPRC/CSK/PPP2R1A/TAOK3/MIR138-2/RGS3/RB1/CORO1C/DUSP3/GGNBP2/DUS2/TSC2/HHEX/TRIB1/HEXIM1/GMFG/DTNBP1/NPRL2/PRKN                                                                                                                                                                                               |
| Biological Process | GO:0046474 | glycerophospholipid biosynthetic process                  | 46/2279 | 230/18866 | 0.0003748 | 0.0315146 | 0.0285156 | 46 | CPNE6/SYNJ2/PCYT1A/PIK3CD/MFSD2A/VAC14/LPCAT1/PIP5K1B/INPP5D/PIK3R1/PIGL/PIK3R6/PIGU/PLD1/FPR2/PIGN/ACP6/PITPNM2/SLC44A4/INPP4A/PIK3R5/PIP4K2A/PITPNM1/CPNE1/PGS1/DGKQ/SH3YL1/CHPT1/PCTP/PLEKHA2/PDGFB/DGKA/DGKD/INPP5E/PI4K2A/PI4KA/PIGQ/ABHD5/RUFY1/CHKB/PTDSS2/INPP5F/LPIN1/CDS2/AGPAT5/ETNK2                                                                                                                                                                                                                                      |
| Biological Process | GO:0050854 | regulation of antigen receptor-mediated signaling pathway | 19/2279 | 69/18866  | 0.0003915 | 0.0324895 | 0.0293976 | 19 | FOXP1/LCK/RUNX1/DUSP22/CD226/PTPN6/PRKCH/PTPRJ/PRKCB/LILRB4/BLK/PTPRC/BCL10/DUSP3/ELF1/CYLD/RELA/EZR/SLA2                                                                                                                                                                                                                                                                                                                                                                                                                             |
| Biological Process | GO:0072511 | divalent inorganic cation transport                       | 83/2279 | 478/18866 | 0.0003948 | 0.0324895 | 0.0293976 | 83 | TRPM2/PDE4D/TRIM27/RVFN/SLC25A25/SLC39A11/THADA/IL16/CASQ2/ITPR2/LCK/CACNA1C/SLC11A1/CACNA2D4/SLC24A4/VDR/MYLK/SLC8A1/PKD1L1/ANXA6/UBASH3B/CDH23/CCL5/SPG7/CD84/TLR9/ABCC2/ATP2B2/ITPR1/SLC11A2/BIN1/TRPM6/JSRP1/AHNAK/GNAI2/NOS1AP/PTPN6/RASA3/NIPAL3/TMEM163/P2RY6/SPHK2/PHB/PRKCB/MYO5A/HTT/PTPRC/ATP2A3/PDGFB/ZDHHC17/NOL3/TPCN2/ARRB2/CNNM2/TRPM3/BCL2/GSTO1/SLC39A13/P2RX1/DNM1L/PRKCE/TMEM37/F2R/TMC1/PDGFRB/ANO6/DYSF/CACNA1B/ANK2/CHERP/PLCG1/ATP7B/P2RX5/TRPV2/CD33/CASQ1/FGF14/SLC41A1/GRAMD2A/CBARP/STIMATE/SARAF/CRACR2A |
| Biological Process | GO:0010762 | regulation of fibroblast migration                        | 12/2279 | 34/18866  | 0.0003967 | 0.0324895 | 0.0293976 | 12 | PRR5L/MIR145/ITGB1BP1/SLC8A1/ARHGEF7/THBS1/TGFB1/FER/MTA2/CORO1C/PRKCE/GNA12                                                                                                                                                                                                                                                                                                                                                                                                                                                          |
| Biological Process | GO:0032271 | regulation of protein polymerization                      | 46/2279 | 231/18866 | 0.0004143 | 0.0336422 | 0.0304406 | 46 | VILL/TRIM27/TBCD/DCTN1/SSH1/GSN/KANK1/CTTN/COTL1/CAPG/CYFIP2/NCK2/WHAMM/BAIAP2L1/NAV3/CDC42EP1/BIN1/BAIAP2/SSH3/PREX1/WASL/FER/TMOD3/SVIL/PFN1/CSF3/GMFB/NUMA1/SPTA1/NCKAP1/ADD1/AVIL/TPPP3/PRKCE/FLII/MYO1C/SPTAN1/TMOD1/CYFIP1/GMFG/BAIAP2L2/MYADM/SPTBN4/DBNL/PLEKHG2/CYRIB                                                                                                                                                                                                                                                        |

|                    |            |                                                      |         |           |           |           |           |    |                                                                                                                                                                                                                                                                                                                                                                                                                                                                                                                                     |
|--------------------|------------|------------------------------------------------------|---------|-----------|-----------|-----------|-----------|----|-------------------------------------------------------------------------------------------------------------------------------------------------------------------------------------------------------------------------------------------------------------------------------------------------------------------------------------------------------------------------------------------------------------------------------------------------------------------------------------------------------------------------------------|
| Biological Process | GO:0018210 | peptidyl-threonine modification                      | 29/2279 | 126/18866 | 0.0004231 | 0.0340694 | 0.0308272 | 29 | AZU1/RPTOR/SPRED2/PRKAG2/LMTK2/GALNT2/DYRK4/TNKS/ULK1/CHI3L1/HIPK3/PRKCA/HIPK2/TGFBR2/APP/SMAD7/TGFB1/DGKQ/PRKCB/AXIN1/DYRK2/CAB39/PPP2R5D/BCL2/S1PR2/CDC42BPB/MARK2/EIF4G1/GRK2                                                                                                                                                                                                                                                                                                                                                    |
| Biological Process | GO:0010595 | positive regulation of endothelial cell migration    | 30/2279 | 132/18866 | 0.0004271 | 0.0340968 | 0.030852  | 30 | FOXP1/CALR/NRP2/MAP3K3/MIR143/RIN2/HDAC7/ANGPT1/ITGB1BP1/PRKCA/MIR199A1/GPLD1/MIR101-2/STAT5A/THBS1/AKT3/MIR27A/MIR23A/FGFR1/TGFB1/ZNF580/ITGB3/GRN/PDGFB/ETS1/NFE2L2/MIR199A2/PLCG1/ADGRA2/PLPP3                                                                                                                                                                                                                                                                                                                                   |
| Biological Process | GO:0097193 | intrinsic apoptotic signaling pathway                | 55/2279 | 290/18866 | 0.0004348 | 0.0344244 | 0.0311484 | 55 | S100A8/P4HB/ENO1/LCK/BRCA2/URI1/ERN1/TNFRSF1B/PIK3R1/PLAGL2/BMF/ZNF622/TNF/TRAF2/NCK2/HIPK2/ITPR1/CUL3/RRM2B/NACC2/ZNF385A/TNFRSF1A/CLU/HDAC1/CIDEB/SGMS1/RIPK3/PERP/STK24/CDIP1/DYRK2/ATP2A3/NOL3/NFE2L2/FNIP2/ANKRD2/SGPP1/FIS1/DAPK2/BCL2/DNM1L/CHEK2/ARHGEF2/TP53BP2/CEBPB/CRIP1/BCL2L1/CYLD/BCL3/BAG5/GRINA/XPA/PRKN/MARCHF7/FBH1                                                                                                                                                                                              |
| Biological Process | GO:0097178 | ruffle assembly                                      | 14/2279 | 44/18866  | 0.0004558 | 0.0357906 | 0.0323846 | 14 | TACSTD2/DEF8/KANK1/RHOG/SH3YL1/EPS8L3/EPS8L1/PFN1/PLEKHM1/CORO1C/PDGFRB/CYFIP1/NDEL1/DBNL                                                                                                                                                                                                                                                                                                                                                                                                                                           |
| Biological Process | GO:0006790 | sulfur compound metabolic process                    | 67/2279 | 371/18866 | 0.0004681 | 0.0361636 | 0.0327221 | 67 | CSGALNACT1/SPOCK2/HS3ST3B1/ACSL1/DSE/HEXB/FAR2/GADL1/GALNS/ANGPT1/CHSY1/GGT1/ACOT13/SULT6B1/ARSG/LPO/CBS/MICAL1/MICAL2/CHST11/ABCC2/STAT5A/MSRA/A BHD14B/COMT/CHST15/CNDP2/NDST1/CHST2/HSCB/OGDH/EGFLAM/ACOT7/ACSS1/XYL1/PC/SULT1A2/SLC26A1/GSTM5/AGXT/ACACB/MGST2/ST3GAL4/ACSS2/B4GALT3/NFE2L2/MTHFD1/ARSB/PAPSS2/ADO/GSTO1/ACACA/ACSF3/MAT1A/HMGCL/GLRX2/ADI1/ACAT1/HMGCS1/SCD/TPST1/GSTO2/SLC25A1/ST3GAL2/B3GNT2/B4GAT1/ACP3                                                                                                     |
| Biological Process | GO:0051235 | maintenance of location                              | 60/2279 | 324/18866 | 0.0004682 | 0.0361636 | 0.0327221 | 60 | TRPM2/LTBP1/PNPLA2/PDE4D/S100A8/EHD1/SORL1/CALR/IL10/HK1/PPARG/GSN/LCN2/TMEM159/CASQ2/ITPR2/LCK/HEXB/SYNE1/CACNA1C/VPS13D/SLC8A1/SUFU/TNF/ANXA6/UBASH3B/ABCG1/ITPR1/JSRP1/PTPN6/RASA3/UVRAG/P2RY6/MYO5A/NR1H2/HTT/HK2/ITGB3/PTPRC/ABCA1/ACACB/FTO/NOL3/TPCN2/MORC3/GSTO1/PRKCE/SP100/F2R/ABHD5/DYSF/ANK2/AP3D1/CHERP/PLCG1/ATP7B/BCL3/CASQ1/CDS2/BSCL2                                                                                                                                                                              |
| Biological Process | GO:0001667 | ameboidal-type cell migration                        | 83/2279 | 481/18866 | 0.0004823 | 0.0369542 | 0.0334374 | 83 | SEMA6B/S100P/ARID5B/RREB1/TACSTD2/FOXP1/CALR/NRP2/PPARG/PRR5L/KANK1/MAP3K3/MIR143/MIR145/RIN2/HDAC7/ANGPT1/ARHGDI8/DOCK1/ITGB1BP1/SLC8A1/PRKCA/ARHGEF7/MIR199A1/GPLD1/TNF/ANXA6/ZEB2/MIR101-2/SEMA4A/STAT5A/RTN4/JUP/TGFBR2/THBS1/TNS1/MYH9/CTSH/SEMA4B/AKT3/MIR24-2/MIR27A/MIR23A/ILK/MIA3/PXN/WNT11/PLEKHG5/LTB4R2/FGFR1/AGO2/TGFB1/ZNF580/FER/SEMA4D/IQSEC1/NF1/PFN1/BMPER/ITGB3/GRN/PDGFB/MTA2/ETS1/NFE2L2/ITGB2/VASH1/ARSB/MIR199A2/NOTCH1/CORO1C/MEF2C/PRKCE/GNA12/SP100/TNFSF12/PLCG1/ADTRP/PDXDC1/NODAL/PAXIP1/ADGRA2/PLPP3 |
| Biological Process | GO:0030837 | negative regulation of actin filament polymerization | 18/2279 | 65/18866  | 0.000512  | 0.0389136 | 0.0352104 | 18 | VILL/SSH1/GSN/KANK1/CAPG/SSH3/TMOD3/SVIL/PFN1/SPTA1/ADD1/AVIL/FLII/SPTAN1/TMOD1/MYADM/SPTBN4/CYRIB                                                                                                                                                                                                                                                                                                                                                                                                                                  |
| Biological Process | GO:0007041 | lysosomal transport                                  | 26/2279 | 110/18866 | 0.0005334 | 0.0400737 | 0.0362601 | 26 | SORL1/MGRN1/ANKFY1/VPS53/LYST/TGFBRAP1/KIF13A/SNX27/DENND3/BIN1/CLU/VPS18/CLEC16A/ATG14/HOOK2/NUMA1/GRN/SORT1/NPC1/ARSB/NEDD4/AP3D1/NCOA4/MVB12A/VPS51/PRKN                                                                                                                                                                                                                                                                                                                                                                         |

|                    |            |                                              |         |           |           |           |           |    |                                                                                                                                                                                                                                                                                                                                                                                                                                                                                                                            |
|--------------------|------------|----------------------------------------------|---------|-----------|-----------|-----------|-----------|----|----------------------------------------------------------------------------------------------------------------------------------------------------------------------------------------------------------------------------------------------------------------------------------------------------------------------------------------------------------------------------------------------------------------------------------------------------------------------------------------------------------------------------|
| Biological Process | GO:0045766 | positive regulation of angiogenesis          | 42/2279 | 208/18866 | 0.0005357 | 0.0400737 | 0.0362601 | 42 | LRG1/IL10/C3AR1/MAP3K3/MIR143/CHI3L1/HDAC7/RUNX1/PIK3R6/PRKCA/MIR199A1/MIR101-2/HIPK2/JUP/TGFBR2/THBS1/CTSH/DLL1/AKT3/MIR27A/MIR23A/FLT1/JAK1/AGO2/PRKCB/AQP1/BMPER/HK2/GHRL/GRN/ETS1/NFE2L2/ENG/ITGB2/PKM/MIR199A2/AGTR1/PPP1R16B/TNFSF12/PLCG1/NODAL/CX3CR1                                                                                                                                                                                                                                                              |
| Biological Process | GO:1902914 | regulation of protein polyubiquitination     | 10/2279 | 26/18866  | 0.0005497 | 0.0407998 | 0.0369171 | 10 | OTUB2/MIR138-2/OTUB1/NOD2/TRIP12/DYSF/RNF40/PARP10/PRKN/MARCHF7                                                                                                                                                                                                                                                                                                                                                                                                                                                            |
| Biological Process | GO:0097529 | myeloid leukocyte migration                  | 44/2279 | 222/18866 | 0.0006056 | 0.0446042 | 0.0403595 | 44 | AZU1/PRTN3/PDE4D/S100A8/FUT7/CD9/C3AR1/PIK3CD/RHOH/CSF3R/CD177/IL1R1/CCR2/RHOG/CCL5/CSF1R/SFTPD/FPR2/THBS1/C5AR2/MIR24-2/PREX1/DEFB124/FLT1/HRH1/PDGF/D/JAM3/CAMK1D/CXCL17/CCL20/CXCR1/IL6R/PDGF/WDR1/PLCB1/ITGB2/DAPK2/DNM1L/ANO6/DYSF/CCL22/CX3CR1/VAV3/JAML                                                                                                                                                                                                                                                             |
| Biological Process | GO:0070838 | divalent metal ion transport                 | 81/2279 | 471/18866 | 0.0006222 | 0.0453854 | 0.0410663 | 81 | TRPM2/PDE4D/TRIM27/RCVRN/SLC25A25/SLC39A11/THADA/IL16/CASQ2/ITPR2/LCK/CACNA1C/SLC11A1/CACNA2D4/SLC24A4/VDR/MYLK/SLC8A1/PKD1L1/ANXA6/UBASH3B/CDH23/CCL5/SPG7/CD84/TLR9/ATP2B2/ITPR1/SLC11A2/BIN1/TRPM6/JSRP1/AHNAK/GNAI2/NOS1AP/PTPN6/RASA3/NIPAL3/TMEM163/P2RY6/SPHK2/PHB/PRKCB/MYO5A/HTT/PTPRC/ATP2A3/PDGF/ZDHHC17/NOL3/TPCN2/ARRB2/CNNM2/TRPM3/BCL2/GSTO1/SLC39A13/P2RX1/DNM1L/PRKCE/TMEM37/F2R/TMC1/PDGF/RB/ANO6/DYSF/CACNA1B/ANK2/CHERP/PLCG1/P2RX5/TRPV2/CD33/CASQ1/FGF14/SLC41A1/GRAMD2A/CBARP/STIMATE/SARAF/CRACR2A |
| Biological Process | GO:0044409 | entry into host                              | 32/2279 | 147/18866 | 0.0006258 | 0.0453854 | 0.0410663 | 32 | TRIM27/P4HB/TRIM38/GSN/TRIM8/WWP2/SLC10A1/CD55/TRIM10/SLC1A5/CLEC5A/SNX3/UVRAG/ITGB5/PHB/FCN1/TRIM5/VPS18/ITGB3/CTSB/TPCN2/NPC1/CDH1/SLC52A2/EPS15/TYRO3/ITGB6/SIVA1/TRIM26/GRK2/NECTIN1/NECTIN4                                                                                                                                                                                                                                                                                                                           |
| Biological Process | GO:1903708 | positive regulation of hemopoiesis           | 41/2279 | 204/18866 | 0.0006832 | 0.0491761 | 0.0444963 | 41 | PRKCZ/RHOH/CREB1/MIR145/MYB/RUNX1/INPP5D/NLRP3/ITPKB/PIK3R6/PRKCA/TNF/ZBTB16/TGFBR2/TESC/BRD1/RIPK1/ZMIZ1/MTURN/ZBTB7B/TGFB1/CD101/RARA/LILRB4/CSF3/PTPRC/TMEM64/ETS1/PNP/RB1/HLX/RUNX3/TRIB1/CYLD/AP3D1/KAT7/INHBA/LIF/FADD/PCID2/VSIR                                                                                                                                                                                                                                                                                    |
| Biological Process | GO:0051250 | negative regulation of lymphocyte activation | 33/2279 | 154/18866 | 0.0006958 | 0.0495934 | 0.0448738 | 33 | IL10/MAD1L1/RUNX1/INPP5D/FGR/LAX1/TNFAIP3/LOXL3/SFTPD/FBXO7/MNDA/DUSP22/HLA-F/PTPN6/MIR27A/SMAD7/TNFRSF21/ZBTB7B/TIGIT/ZC3H8/BLK/PGLYRP1/DUSP3/BANK1/HLX/CEBPB/RUNX3/TYRO3/INHBA/PELI1/TMEM131L/VSIR/MARCHF7                                                                                                                                                                                                                                                                                                               |
| Biological Process | GO:0034446 | substrate adhesion-dependent cell spreading  | 25/2279 | 106/18866 | 0.0006995 | 0.0495934 | 0.0448738 | 25 | P4HB/RREB1/TACSTD2/PARVB/CALR/KANK1/DOCK1/ITGB1BP1/PIK3R1/ARHGEF7/DNM2/EPHB3/ACTN4/ILK/PREX1/PXN/FER/OLFM4/ITGB3/CASS4/CORO1C/PARVG/TYRO3/LAMB3/MYADM                                                                                                                                                                                                                                                                                                                                                                      |
| Biological Process | GO:0051348 | negative regulation of transferase activity  | 55/2279 | 296/18866 | 0.000725  | 0.0508037 | 0.045969  | 55 | TRIM27/RPTOR/SPRED2/PRKAG2/SORL1/SH3BP5L/PPARG/ITPRIP/RHOH/PPP1R1B/HIPK3/PRKAR1B/ITGB1BP1/DUSP14/SLC8A1/LAX1/UBASH3B/TNFAIP3/FBXO7/SH3BP5/DUSP22/TESC/SMYD3/PTPN6/MIR24-2/ILK/PRKRIP1/SMAD7/IGF1R/LATS2/PTPRJ/NF1/MLLT1/GMFB/WWTR1/PTPRC/CSK/PPP2R1A/TAOK3/MIR138-2/RGS3/RB1/CORO1C/DUSP3/GGNBP2/DUS2/TSC2/HHEX/TRIB1/HEXIM1/GMFG/BAG5/DTNBP1/NPRL2/PRKN                                                                                                                                                                   |

|                    |            |                                               |         |           |           |           |           |    |                                                                                                                                                                                                                                                                                                                                                                                                                                                                                       |
|--------------------|------------|-----------------------------------------------|---------|-----------|-----------|-----------|-----------|----|---------------------------------------------------------------------------------------------------------------------------------------------------------------------------------------------------------------------------------------------------------------------------------------------------------------------------------------------------------------------------------------------------------------------------------------------------------------------------------------|
| Biological Process | GO:0051208 | sequestering of calcium ion                   | 28/2279 | 124/18866 | 0.0007272 | 0.0508037 | 0.045969  | 28 | TRPM2/PDE4D/CALR/CASQ2/ITPR2/LCK/CACNA1C/SLC8A1/ANXA6/UBASH3B/ITPR1/JSRP1/PTPN6/RASA3/P2RY6/MYO5A/HTT/PTPRC/NOL3/TPCN2/GSTO1/PRKCE/F2R/ANK2/CHERP/PLCG1/ATP7B/CASQ1                                                                                                                                                                                                                                                                                                                   |
| Biological Process | GO:0006040 | amino sugar metabolic process                 | 13/2279 | 41/18866  | 0.0007496 | 0.0519863 | 0.0470391 | 13 | CSGALNACT1/NAGK/AMDHD2/CHI3L1/NPL/MGAT3/CHIT1/CHST2/ST6GAL1/FN3K/GFPT2/CHI3L2/DPAGT1                                                                                                                                                                                                                                                                                                                                                                                                  |
| Biological Process | GO:0071375 | cellular response to peptide hormone stimulus | 60/2279 | 330/18866 | 0.0007561 | 0.0520566 | 0.0471027 | 60 | PRKCZ/SORL1/FUT7/PPARG/ADCY2/KANK1/CREB1/PTPRE/MIR143/MIR145/PRKAR1B/ADCY9/PIK3R1/RAP1B/GLPD1/RAB31/STAT5A/BAIAP2L1/BAIAP2/GRB10/GNAI2/ATP6V1B2/ZDHHC7/PXN/IGF1R/ZBTB7B/CRHBP/FER/PRKCB/POR/MYO5A/ARID1B/GHRL/CSK/AGTRAP/PRKCI/NFE2L2/ADCY4/INSRR/PKM/ATP6V0B/BCAR3/PCK2/AGTR1/MYO1C/TSC2/FOXO1/MBD5/SOGA1/SREBF1/PDE3B/CYFIP1/RELA/WBTC1/NDEL1/LPIN1/PRKAA1/MARS1/ATP6VOC/ATP6V1C1                                                                                                   |
| Biological Process | GO:0061572 | actin filament bundle organization            | 34/2279 | 161/18866 | 0.0007662 | 0.0523749 | 0.0473907 | 34 | ARHGEF10/TACSTD2/ITGB1BP1/PIK3R1/SMAD3/ARRB1/MICAL1/SH3PXD2B/ARAP1/BAIAP2L1/CUL3/BAIAP2/SYNPO2L/ACTN1/ACTN4/PXN/WNT11/ITGB5/PPFIA1/PFN1/ESPN/ACTG1/MIR138-2/ADD1/ARHGEF10L/ARHGEF18/FSCN3/ARHGEF15/SHROOM1/EZR/BAIAP2L2/SYNPO/RFLNA/PRKN                                                                                                                                                                                                                                              |
| Biological Process | GO:0016197 | endosomal transport                           | 47/2279 | 244/18866 | 0.0007733 | 0.0524806 | 0.0474863 | 47 | TRIM27/EHD1/LMTK2/DCTN1/SORL1/STX5/VTI1A/ANKFY1/VPS53/LYST/DENND1A/ACAP2/HEATR5A/TRAPPC10/SNX27/TBC1D10A/ITSN1/ERC1/SNX3/ZDHHC2/VPS26B/UBE2O/AKAP5/EPS15L1/AP5S1/CLEC16A/ABCA1/NUMA1/SNX18/TBC1D14/SORT1/MICALL1/SGSM2/CORO1C/DNM1L/EPS15/ARHGAP1/AP3D1/CLN5/INPP5F/MVB12A/VPS51/CLTCL1/ZFYVE9/PHEA1/PRKN/VPS35L                                                                                                                                                                      |
| Biological Process | GO:0051650 | establishment of vesicle localization         | 42/2279 | 212/18866 | 0.0008022 | 0.0536288 | 0.0485253 | 42 | CTSZ/PRKCZ/SERPINA1/TGFA/STX5/CSNK1D/NDE1/KIF13A/DNM2/TRAPPC10/DYNC1H1/C17orf75/CUL3/TRAPPC9/RAB27A/ACTN4/CDH3/WASL/DCTN2/CNIH2/MYO5A/CD59/HTT/SEC13/KIF5C/ANKRD28/DNM1/SEC24C/KIF1B/DNM3/KIFAP3/TMED2/MYO1C/AP3D1/MX1/FBXW11/NDEL1/DTNBP1/SEC31A/IRAG2/PRKN/TRAPPC2                                                                                                                                                                                                                  |
| Biological Process | GO:0016570 | histone modification                          | 80/2279 | 468/18866 | 0.0008041 | 0.0536288 | 0.0485253 | 80 | HDAC4/GFI1/BRD4/BAZ1B/KDM4B/SRCAP/MYB/HDAC7/SIN3B/BRCA2/PRMT2/SKI/ASH2L/SETD2/KANSL1/ARRB1/PRKCA/KDM2A/C6orf89/PADI2/USP3/SMYD3/UHRF1/BRD1/EHMT2/USP36/EPC1/OTUB2/RPS6KA4/TAF10/HDAC1/WDR82/KANSL2/SPHK2/ZBTB7B/PAX7/PHB/ENY2/PRKCB/KMT2D/MTA1/CTBP1/KDM1B/KDM4C/SETD1B/NCOA1/SETD1A/CREBBP/RSF1/TET2/MTA2/ZNF335/PRDM16/PHF19/PER2/OTUB1/USP49/PER1/KDM7A/DNMT1/PIH1D1/PCGF3/TRIP12/SREBF1/RUVBL1/RNF40/KAT7/DYDC2/DYDC1/NTMT1/ING5/FBL/MECOM/LIF/ELK4/SIRT3/PAXIP1/PRKAA1/NSD3/NSD2 |
| Biological Process | GO:0032147 | activation of protein kinase activity         | 60/2279 | 331/18866 | 0.0008171 | 0.0536288 | 0.0485253 | 60 | PRKCZ/KSR1/RPTOR/PRKAG2/PILRB/TGFA/ADCY2/MAP3K3/MIR143/CHI3L1/MAP2K6/SLC11A1/ANGPT1/PRKAR1B/ERN1/ITGB1BP1/ADCY9/ARRB1/TNF/TRAF2/CCL5/FPR1/TGFBR2/TNIK/THBS1/RIPK1/WNT11/PHB/DGKQ/AXIN1/RIPK3/UBE2V1/MUC20/CXCL17/PRR5/ITGB3/GHRL/PTPRC/CAB39/STK3/PDE6H/IL6R/PDGFB/MAP3K14/TAOK3/ADCY4/IRAK2/NTRK1/NOD2/CLSPN/S1PR2/F2R/PDGFC/PRRC1/MAPKAPK3/GADD45G/MARK2/DBNL/PRKAA1/MAP3K20                                                                                                        |
| Biological Process | GO:0034113 | heterotypic cell-cell adhesion                | 17/2279 | 62/18866  | 0.0008201 | 0.0536288 | 0.0485253 | 17 | IL10/LCK/CEACAM6/TNF/JUP/RNASE10/MBP/IL1RN/PERP/JAM3/ITGB3/PTPRC/ITGB2/GCNT2/FLOT1/MYADM/GLDN                                                                                                                                                                                                                                                                                                                                                                                         |



|                    |            |                                                     |         |           |           |           |           |    |                                                                                                                                                                                                                                                                                                            |
|--------------------|------------|-----------------------------------------------------|---------|-----------|-----------|-----------|-----------|----|------------------------------------------------------------------------------------------------------------------------------------------------------------------------------------------------------------------------------------------------------------------------------------------------------------|
| Biological Process | GO:1903510 | mucopolysaccharide metabolic process                | 26/2279 | 113/18866 | 0.0008225 | 0.0536288 | 0.0485253 | 26 | CSGALNACT1/AP2A1/SPOCK2/DSE/HEXB/GALNS/ANGPT1/CHSY1/CHST11/CHST15/NDST1/CHST2/EGFLAM/XYL1/TGFB1/STAB2/PDGFB/ST3GAL4/B4GALT3/LYVE1/ARSB/HAS3/ST3GAL2/B3GNT2/B4GAT1/CEMIP2                                                                                                                                   |
| Biological Process | GO:0048703 | embryonic viscerocranium morphogenesis              | 6/2279  | 11/18866  | 0.0008297 | 0.0536288 | 0.0485253 | 6  | MTHFD1L/CHST11/NDST1/RDH10/MTHFD1/MEF2C                                                                                                                                                                                                                                                                    |
| Biological Process | GO:1902915 | negative regulation of protein polyubiquitination   | 6/2279  | 11/18866  | 0.0008297 | 0.0536288 | 0.0485253 | 6  | OTUB2/MIR138-2/OTUB1/TRIP12/DYSF/PARP10                                                                                                                                                                                                                                                                    |
| Biological Process | GO:2001236 | regulation of extrinsic apoptotic signaling pathway | 34/2279 | 162/18866 | 0.0008594 | 0.0551695 | 0.0499193 | 34 | ITPRIP/CTTN/TNF/TRAF2/TNFAIP3/TRAF1/DEDD2/UNC5B/THBS1/RIPK1/TCF7L2/FGFR1/NF1/HTT/PTPRC/ITM2C/BMP1B/STK3/BCL10/PPP2R1A/NOL3/TRPS1/BCL2/PPP2R1B/SP100/ARHGEF2/BCL2L1/TNFSF12/CYLD/RELA/GOS2/INHBA/FADD/DAPK3                                                                                                 |
| Biological Process | GO:0045747 | positive regulation of Notch signaling pathway      | 16/2279 | 57/18866  | 0.0008757 | 0.055836  | 0.0505224 | 16 | MAML3/SLC35C2/MAML1/ITGB1BP1/AAK1/TSPAN14/MAML2/DLL1/RBPJ/ZMIZ1/EPN2/CREBBP/PRKCI/NOD2/NOTCH1/NOTCH4                                                                                                                                                                                                       |
| Biological Process | GO:0045649 | regulation of macrophage differentiation            | 9/2279  | 23/18866  | 0.000899  | 0.0566283 | 0.0512393 | 9  | MIR145/PRKCA/RIPK1/TGFB1/RB1/TRIB1/INHBA/LIF/FADD                                                                                                                                                                                                                                                          |
| Biological Process | GO:0035264 | multicellular organism growth                       | 32/2279 | 150/18866 | 0.0009    | 0.0566283 | 0.0512393 | 32 | ARID5B/PDE4D/SLC25A25/CREB1/MFSD2A/ANKRD11/CCM2/SH3PXD2B/STAT5A/APP/TAF10/APBA2/RARA/SLC1A2/WWTR1/GHRL/RARG/GRHL2/FTO/ADD1/BCL2/RAI1/NPPC/TMED2/MBD5/ERCC1/WBTC1/EZR/XPA/SPTBN4/ERCC2/ETNK2                                                                                                                |
| Biological Process | GO:0006469 | negative regulation of protein kinase activity      | 47/2279 | 246/18866 | 0.0009271 | 0.0576447 | 0.0521589 | 47 | TRIM27/RPTOR/SPRED2/PRKAG2/SORL1/SH3BP5L/ITPRIP/PPP1R1B/HIPK3/PRKAR1B/ITGB1BP1/DUSP14/SLC8A1/LAX1/UBASH3B/TNFAIP3/FBXO7/SH3BP5/DUSP22/TESC/SMYD3/PTPN6/MIR24-2/ILK/PRKRIP1/IGF1R/LATS2/PTPRJ/NF1/MLLT1/GMFB/WWTR1/PTPRC/PPP2R1A/TAOK3/RGS3/RB1/CORO1C/DUSP3/GGNBP2/DUS2/TSC2/HHEX/TRIB1/HEXIM1/GMFG/DTNBP1 |
| Biological Process | GO:0018022 | peptidyl-lysine methylation                         | 29/2279 | 132/18866 | 0.0009413 | 0.0576447 | 0.0521589 | 29 | GFI1/BRD4/METTL21A/MYB/ASH2L/SETD2/SMYD3/EHMT2/WDR82/KMT2D/KDM4C/SETD1B/SETD1A/TET2/ZNF335/METTL22/PRDM16/PHF19/DNMT1/PIH1D1/DYDC2/DYDC1/MECOM/PAXIP1/EEF1AKMT3/EEF1AKMT2/NSD3/NSD2/CSKMT                                                                                                                  |

|                    |            |                                                                    |         |           |           |           |           |    |                                                                                                                                                                                                                                                                                                                                                                                             |
|--------------------|------------|--------------------------------------------------------------------|---------|-----------|-----------|-----------|-----------|----|---------------------------------------------------------------------------------------------------------------------------------------------------------------------------------------------------------------------------------------------------------------------------------------------------------------------------------------------------------------------------------------------|
| Biological Process | GO:0120163 | negative regulation of cold-induced thermogenesis                  | 14/2279 | 47/18866  | 0.0009554 | 0.0576447 | 0.0521589 | 14 | MAP2K6/LNPEP/ACOT13/RHEB/RBPJ/NR1H2/PCTP/ARNTL/PLCL1/RB1/NOTCH1/IL18R1/ZNF423/IP6K1                                                                                                                                                                                                                                                                                                         |
| Biological Process | GO:0098713 | leucine import across plasma membrane                              | 4/2279  | 5/18866   | 0.0009597 | 0.0576447 | 0.0521589 | 4  | SLC43A2/SLC7A5/SLC43A1/SLC7A8                                                                                                                                                                                                                                                                                                                                                               |
| Biological Process | GO:1901563 | response to camptothecin                                           | 4/2279  | 5/18866   | 0.0009597 | 0.0576447 | 0.0521589 | 4  | BLM/SPIDR/RECQL5/PRKAA1                                                                                                                                                                                                                                                                                                                                                                     |
| Biological Process | GO:1902339 | positive regulation of apoptotic process involved in morphogenesis | 4/2279  | 5/18866   | 0.0009597 | 0.0576447 | 0.0521589 | 4  | TNFRSF1B/VDR/TNFRSF1A/NOTCH1                                                                                                                                                                                                                                                                                                                                                                |
| Biological Process | GO:1903801 | L-leucine import across plasma membrane                            | 4/2279  | 5/18866   | 0.0009597 | 0.0576447 | 0.0521589 | 4  | SLC43A2/SLC7A5/SLC43A1/SLC7A8                                                                                                                                                                                                                                                                                                                                                               |
| Biological Process | GO:0016050 | vesicle organization                                               | 61/2279 | 340/18866 | 0.0009687 | 0.0576447 | 0.0521589 | 61 | CTSZ/CALR/SERPINA1/TGFA/STX5/ACRBP/VTI1A/ANKFY1/CSNK1D/CREB1/LYST/TGFBRAP1/RAB5B/KIF13A/DNM2/TRAPPC10/SEC23B/ZEB2/MYO18A/CUL3/TRAPPC9/RAB27A/SNX3/ZDHHC2/ZNF385A/UVRAG/MIA3/SNX11/WASL/CNIH2/VPS18/CD59/SEC13/ABCA1/HOOK2/ANKRD28/PRKCI/SORT1/DNM1/SEC24C/PI4K2A/BCL2/DNM3/CORO1C/F2R/EPS15/TMED2/DYSF/AP3D1/MX1/DTNBP1/MVB12A/TSNARE1/SEC31A/VAV3/PHETA1/IRAG2/PRKN/TRAPPC2/MFSD14A/RUBCNL |
| Biological Process | GO:0051017 | actin filament bundle assembly                                     | 33/2279 | 157/18866 | 0.0009883 | 0.0576447 | 0.0521589 | 33 | ARHGEF10/TACSTD2/ITGB1BP1/PIK3R1/SMAD3/ARRB1/MICAL1/SH3PXD2B/ARAP1/BAIAP2L1/CUL3/BAIAP2/SYNPO2L/ACTN1/ACTN4/PXN/WNT1/ITGB5/PPFIA1/PFN1/ESPN/ACTG1/MIR138-2/ADD1/ARHGEF10L/ARHGEF18/FSCN3/ARHGEF15/SHROOM1/EZR/BAIAP2L2/SYNPO/PRKN                                                                                                                                                           |
| Biological Process | GO:0034349 | glial cell apoptotic process                                       | 7/2279  | 15/18866  | 0.000989  | 0.0576447 | 0.0521589 | 7  | PRKCA/TRAF2/DLL1/TNFRSF21/PRKCH/PRKCI/RB1                                                                                                                                                                                                                                                                                                                                                   |
| Biological Process | GO:0097202 | activation of cysteine-type endopeptidase activity                 | 7/2279  | 15/18866  | 0.000989  | 0.0576447 | 0.0521589 | 7  | NLRC4/CYFIP2/TBC1D10A/CIDEB/PERP/ASPH/FADD                                                                                                                                                                                                                                                                                                                                                  |

|                    |            |                                                                          |         |           |           |           |           |    |                                                                                                                                                                                                                                                                                                                                                                                                                     |
|--------------------|------------|--------------------------------------------------------------------------|---------|-----------|-----------|-----------|-----------|----|---------------------------------------------------------------------------------------------------------------------------------------------------------------------------------------------------------------------------------------------------------------------------------------------------------------------------------------------------------------------------------------------------------------------|
| Biological Process | GO:1900029 | positive regulation of ruffle assembly                                   | 7/2279  | 15/18866  | 0.000989  | 0.0576447 | 0.0521589 | 7  | DEF8/EPS8L3/EPS8L1/PFN1/PLEKHM1/CYFIP1/NDEL1                                                                                                                                                                                                                                                                                                                                                                        |
| Biological Process | GO:0097306 | cellular response to alcohol                                             | 22/2279 | 91/18866  | 0.0010051 | 0.0577537 | 0.0522576 | 22 | BLM/SPIDR/PPARG/ADCY2/ITPR2/GPLD1/LARP1/JUP/RECQL5/P2RY6/SPHK2/FDX1/MLC1/ABCA1/CDH1/GNG2/ACACA/PRKCE/GRAMD1A/HMGCS1/INHBA/PRKAA1                                                                                                                                                                                                                                                                                    |
| Biological Process | GO:0090132 | epithelium migration                                                     | 65/2279 | 368/18866 | 0.0010236 | 0.0577537 | 0.0522576 | 65 | S100P/RREB1/TACSTD2/FOXP1/CALR/NRP2/PPARG/KANK1/MAP3K3/MIR143/RIN2/HDAC7/ANGPT1/DOCK1/ITGB1BP1/PRKCA/MIR199A1/GPLD1/TNF/ZEB2/MIR101-2/SEMA4A/STAT5A/RTN4/JUP/TGFBR2/THBS1/MYH9/CTSH/AKT3/MIR24-2/MIR27A/MIR23A/MIA3/PXN/PLEKHG5/LTB4R2/FGFR1/TGFB1/ZNF580/IQSEC1/NF1/PFN1/BMPER/ITGB3/GRHL2/GRN/PDGFB/ETS1/NFE2L2/ITGB2/VASH1/ARSB/MIR199A2/NOTCH1/CORO1C/MEF2C/PRKCE/SP100/TNFSF12/PLCG1/ADTRP/PAXIP1/ADGRA2/PLPP3 |
| Biological Process | GO:0019058 | viral life cycle                                                         | 61/2279 | 341/18866 | 0.0010438 | 0.0577537 | 0.0522576 | 61 | SLPI/TRIM27/P4HB/TRIM38/GSN/TRIM8/WWP2/SLC10A1/CD55/TRIM10/RAE1/SLC1A5/SRPK2/TNF/CCL5/CLEC5A/LARP1/SNX3/UVRAG/ITGB5/PC/PHB/FCN1/CTBP1/NUP93/TRIM5/RAB43/VPS18/CTBP2/TNIP1/ITGB3/SEC13/USP6NL/CTSB/TPCN2/NPC1/BCL2/PI4KA/NOTCH1/SLC52A2/EP515/LTF/NEDD4/ILF3/MX1/TYRO3/ITGB6/NR5A2/PARP10/BANF1/SIVA1/MVB12A/ISG20/TRIM26/NFIA/SPCS1/GRK2/PRKN/SHFL/NECTIN1/NECTIN4                                                  |
| Biological Process | GO:0003330 | regulation of extracellular matrix constituent secretion                 | 5/2279  | 8/18866   | 0.0010455 | 0.0577537 | 0.0522576 | 5  | TNFRSF1B/TNFRSF1A/NOTCH1/CPB2/ADTRP                                                                                                                                                                                                                                                                                                                                                                                 |
| Biological Process | GO:0003373 | dynammin family protein polymerization involved in membrane fission      | 5/2279  | 8/18866   | 0.0010455 | 0.0577537 | 0.0522576 | 5  | DNM2/DNM1/DNM3/DNM1L/MX1                                                                                                                                                                                                                                                                                                                                                                                            |
| Biological Process | GO:0003374 | dynammin family protein polymerization involved in mitochondrial fission | 5/2279  | 8/18866   | 0.0010455 | 0.0577537 | 0.0522576 | 5  | DNM2/DNM1/DNM3/DNM1L/MX1                                                                                                                                                                                                                                                                                                                                                                                            |
| Biological Process | GO:0034351 | negative regulation of glial cell apoptotic process                      | 5/2279  | 8/18866   | 0.0010455 | 0.0577537 | 0.0522576 | 5  | PRKCA/TRAF2/DLL1/PRKCH/PRKCI                                                                                                                                                                                                                                                                                                                                                                                        |
| Biological Process | GO:0043313 | regulation of neutrophil degranulation                                   | 5/2279  | 8/18866   | 0.0010455 | 0.0577537 | 0.0522576 | 5  | ABR/CD177/BCR/ITGB2/PRAM1                                                                                                                                                                                                                                                                                                                                                                                           |

|                    |            |                                                                              |         |           |           |           |           |    |                                                                                                                                                                                                                                                                                                                                                               |
|--------------------|------------|------------------------------------------------------------------------------|---------|-----------|-----------|-----------|-----------|----|---------------------------------------------------------------------------------------------------------------------------------------------------------------------------------------------------------------------------------------------------------------------------------------------------------------------------------------------------------------|
| Biological Process | GO:1990961 | xenobiotic detoxification by transmembrane export across the plasma membrane | 5/2279  | 8/18866   | 0.0010455 | 0.0577537 | 0.0522576 | 5  | ABCC2/OSCP1/RALBP1/SLC22A5/PDZK1                                                                                                                                                                                                                                                                                                                              |
| Biological Process | GO:0030042 | actin filament depolymerization                                              | 16/2279 | 58/18866  | 0.0010756 | 0.0587311 | 0.053142  | 16 | VILL/GSN/CAPG/MICAL1/MICAL2/MICAL3/TMOD3/SVIL/WDR1/SPTA1/ADD1/AVIL/FLII/SPTAN1/TMOD1/SPTBN4                                                                                                                                                                                                                                                                   |
| Biological Process | GO:0043551 | regulation of phosphatidylinositol 3-kinase activity                         | 16/2279 | 58/18866  | 0.0010756 | 0.0587311 | 0.053142  | 16 | PIK3R1/PIK3R6/FGR/FPR2/PIK3R5/FLT1/TGFB1/VAV2/ATG14/PDGFB/MIR138-2/NOD2/PDGFRB/WDR81/VAV3/SLA2                                                                                                                                                                                                                                                                |
| Biological Process | GO:0007162 | negative regulation of cell adhesion                                         | 55/2279 | 301/18866 | 0.0010873 | 0.0590308 | 0.0534132 | 55 | TBCD/PLXNC1/TACSTD2/IL10/CD9/MAD1L1/KANK1/RUNX1/ANGPT1/ARHGDIB/ITGB1BP1/PIK3R1/TGFB1/SPINT2/LAX1/UBASH3B/LOXL3/SFTPD/DUSP22/CCM2L/THBS1/MBP/PTPN6/ACTN4/MIR27A/SMAD7/TNFRSF21/MIA3/ZBTB7B/TGFB1/IL1RN/TIGIT/SEMA4D/NF1/ZC3H8/JAM3/PTPRC/MIR138-2/CDH1/NOTCH1/CORO1C/GCNT2/DUSP3/NOTCH4/HLX/CEBPB/RUNX3/PDE3B/ADTRP/ADAMDEC1/MYADM/PELI1/TMEM131L/VSIR/MARCHF7 |
| Biological Process | GO:0034109 | homotypic cell-cell adhesion                                                 | 21/2279 | 86/18866  | 0.0011297 | 0.0602981 | 0.0545599 | 21 | CD9/TJP2/PRKCA/UBASH3B/CCL5/MYL12A/CCM2L/JUP/MYH9/ITGA2B/PTPN6/ILK/JAK1/HBB/BLK/ITGB3/ACTG1/TYRO3/PTPRU/CEACAM5/PLPP3                                                                                                                                                                                                                                         |
| Biological Process | GO:0035023 | regulation of Rho protein signal transduction                                | 21/2279 | 86/18866  | 0.0011297 | 0.0602981 | 0.0545599 | 21 | ARHGEF10/KANK1/AKAP13/MYO9B/ARHGDIB/ARRB1/CUL3/SYNPO2L/EPS8L3/EPS8L1/ABCA1/BCR/ARHGEF25/ARHGEF18/F2R/ARHGEF28/ARHGEF2/GPR4/PDGFRB/FLOT1/PRAG1                                                                                                                                                                                                                 |
| Biological Process | GO:1903901 | negative regulation of viral life cycle                                      | 21/2279 | 86/18866  | 0.0011297 | 0.0602981 | 0.0545599 | 21 | SLPI/TRIM27/GSN/TRIM8/TRIM10/SRPK2/TNF/CCL5/SNX3/FCN1/TRIM5/TNIP1/LTF/ILF3/MX1/PARP10/BANF1/ISG20/TRIM26/PRKN/SHFL                                                                                                                                                                                                                                            |
| Biological Process | GO:1900024 | regulation of substrate adhesion-dependent cell spreading                    | 15/2279 | 53/18866  | 0.0011451 | 0.0607333 | 0.0549537 | 15 | P4HB/RREB1/TACSTD2/CALR/KANK1/DOCK1/ITGB1BP1/ARHGEF7/DNM2/ACTN4/PREX1/OLFM4/CASS4/CORO1C/MYADM                                                                                                                                                                                                                                                                |
| Biological Process | GO:0060828 | regulation of canonical Wnt signaling pathway                                | 54/2279 | 295/18866 | 0.0011506 | 0.0607333 | 0.0549537 | 54 | RNF220/KANK1/CSNK1D/TNKS/CCDC88C/MIR145/SMAD3/AMFR/FAM53B/UBAC2/JUP/CUL3/RBPJ/TCF7L2/CDK14/ILK/LIMD1/HDAC1/LATS2/WNT11/CDH3/TGFB1/KREMEN1/AXIN1/TLE1/LRRK1/WWTR1/TMEM64/WNT5B/STK3/CSNK1E/PSMF1/KREMEN2/ARNTL/PSMB7/TTC21B/NOTCH1/ZBED3/FOXO1/CHD8/CYLD/ANKRD6/RUVBL1/ZBED2/PPM1N/PTPRU/CCNY/GID8/DAPK3/PSMD13/NPHP4/TMEM131L/ADGRA2/PRKN                     |

|                    |            |                                                               |         |           |           |           |           |    |                                                                                                                                                                                                                                                                                                                                                                                                                                                                                              |
|--------------------|------------|---------------------------------------------------------------|---------|-----------|-----------|-----------|-----------|----|----------------------------------------------------------------------------------------------------------------------------------------------------------------------------------------------------------------------------------------------------------------------------------------------------------------------------------------------------------------------------------------------------------------------------------------------------------------------------------------------|
| Biological Process | GO:0016569 | covalent chromatin modification                               | 81/2279 | 481/18866 | 0.0011725 | 0.0611906 | 0.0553674 | 81 | HDAC4/GFI1/BRD4/BAZ1B/KDM4B/SRCAP/MYB/HDAC7/SIN3B/BRCA2/PRMT2/SKI/ASH2L/SETD2/KANSL1/ARRB1/PRKCA/KDM2A/C6orf89/PADI2/USP3/SMYD3/UHRF1/BRD1/EHMT2/USP36/EPC1/OTUB2/RPS6KA4/TAF10/HDAC1/WDR82/KANSL2/SPHK2/ZBTB7B/PAX7/PHB/ENY2/PRKCB/KMT2D/MTA1/CTBP1/KDM1B/ATF7IP/KDM4C/SETD1B/NCOA1/SETD1A/CREBBP/RSF1/TET2/MTA2/ZNF335/PRDM16/PHF19/PER2/OTUB1/USP49/PER1/KDM7A/DNMT1/PIH1D1/PCGF3/TRIP12/SREBF1/RUVBL1/RNF40/KAT7/DYDC2/DYDC1/NTMT1/ING5/FBL/MECOM/LIF/ELK4/SIRT3/PAXIP1/PRKAA1/NSD3/NSD2 |
| Biological Process | GO:0051648 | vesicle localization                                          | 44/2279 | 229/18866 | 0.0011768 | 0.0611906 | 0.0553674 | 44 | CTSZ/PRKCZ/SERPINA1/TGFA/STX5/CSNK1D/NDE1/KIF13A/DNM2/TRAPPC10/DYNC1H1/C17orf75/CUL3/TRAPPC9/RAB27A/SYN3/ACTN4/CDH3/WASL/DCTN2/CNIH2/MYO5A/SYN2/CDC59/HTT/SEC13/KIF5C/ANKRD28/DNM1/SEC24C/KIF1B/DNM3/KIFAP3/TMED2/MYO1C/AP3D1/MX1/FBXW11/NDEL1/DTNBP1/SEC31A/IRAG2/PRKN/TRAPPC2                                                                                                                                                                                                              |
| Biological Process | GO:0002691 | regulation of cellular extravasation                          | 11/2279 | 33/18866  | 0.0011897 | 0.0611906 | 0.0553674 | 11 | ELANE/FUT4/ABR/FUT7/IL1R1/CCR2/RIPK3/PDGFD/BCR/PLCB1/FADD                                                                                                                                                                                                                                                                                                                                                                                                                                    |
| Biological Process | GO:0018212 | peptidyl-tyrosine modification                                | 66/2279 | 377/18866 | 0.0011907 | 0.0611906 | 0.0553674 | 66 | PRKCZ/AATK/LMTK2/DYRK4/TGFA/SH3BP5L/BAZ1B/TTN/LCK/HIPK3/MAP2K6/ANGPT1/FGR/TNF/CCL5/CSF1R/NCK2/EPHB3/SH3BP5/HIPK2/DUSP22/CAMKK2/SLA/APP/PTPN6/TNFRSF1A/IGF1R/FLT1/JAK1/FGFR1/TGFB1/FER/PTPRJ/CLK3/SEMA4D/DGKQ/PDGFD/LRRK1/DYRK2/BLK/CSF3/TESK2/ITGB3/GHRL/PTPRC/CSK/IL6R/PDGFB/PPP2R1A/CASS4/ARRB2/ITGB2/NTRK1/INSRR/PRKCE/GGNBP2/BANK1/PDGFC/ARHGEF2/PDGFRB/TYRO3/TPST1/INPP5F/CRLF1/PARP9/LIF                                                                                               |
| Biological Process | GO:0010799 | regulation of peptidyl-threonine phosphorylation              | 14/2279 | 48/18866  | 0.0012009 | 0.0611906 | 0.0553674 | 14 | AZU1/RPTOR/SPRED2/PRKAG2/CHI3L1/APP/SMAD7/TGFB1/DGKQ/AXIN1/CAB39/PPP2R5D/S1PR2/EIF4G1                                                                                                                                                                                                                                                                                                                                                                                                        |
| Biological Process | GO:0048701 | embryonic cranial skeleton morphogenesis                      | 14/2279 | 48/18866  | 0.0012009 | 0.0611906 | 0.0553674 | 14 | SETD2/SMAD3/MTHFD1L/CHST11/TGFBR2/NDST1/RDH10/GRHL2/RUNX2/IFT140/MTHFD1/ALX3/MEF2C/NODAL                                                                                                                                                                                                                                                                                                                                                                                                     |
| Biological Process | GO:0048010 | vascular endothelial growth factor receptor signaling pathway | 23/2279 | 98/18866  | 0.0012044 | 0.0611906 | 0.0553674 | 23 | NRP2/ELMO1/DOCK1/PIK3R1/NCF4/CYFIP2/NCK2/SHB/BAIAP2/GRB10/NCF2/PXN/FLT1/EPN2/PRKCB/VAV2/ITGB3/NCKAP1/NEDD4/MAPKAP3/HHEX/CYFIP1/VAV3                                                                                                                                                                                                                                                                                                                                                          |
| Biological Process | GO:0050856 | regulation of T cell receptor signaling pathway               | 13/2279 | 43/18866  | 0.0012347 | 0.0619594 | 0.0560631 | 13 | LCK/DUSP22/CD226/PTPN6/PTPRJ/LILRB4/BCL10/DUSP3/ELF1/CYLD/RELA/EZR/SLA2                                                                                                                                                                                                                                                                                                                                                                                                                      |
| Biological Process | GO:1903146 | regulation of autophagy of mitochondrion                      | 13/2279 | 43/18866  | 0.0012347 | 0.0619594 | 0.0560631 | 13 | VPS13D/CTTN/FBXO7/CAMKK2/USP36/SMURF1/CLEC16A/HTT/HK2/DNM1L/TSC2/SREBF1/PRKN                                                                                                                                                                                                                                                                                                                                                                                                                 |

|                    |            |                                                                                                                                         |         |           |           |           |           |    |                                                                                                                                                                                                                                                                                                                                                                                                              |
|--------------------|------------|-----------------------------------------------------------------------------------------------------------------------------------------|---------|-----------|-----------|-----------|-----------|----|--------------------------------------------------------------------------------------------------------------------------------------------------------------------------------------------------------------------------------------------------------------------------------------------------------------------------------------------------------------------------------------------------------------|
| Biological Process | GO:0032640 | tumor necrosis factor production                                                                                                        | 26/2279 | 116/18866 | 0.0012391 | 0.0619594 | 0.0560631 | 26 | TRIM27/FOXP1/IL10/MIR140/ANGPT1/PIK3R1/TNFAIP3/TLR9/SPON2/RIPK1/CSAR2/APP/PTPN6/CLU/SPHK2/PTPRJ/RARA/PTPRC/ARRB2/NOD2/ARHGEF2/LTF/CD33/FADD/VSIR/ILRN                                                                                                                                                                                                                                                        |
| Biological Process | GO:0048194 | Golgi vesicle budding                                                                                                                   | 20/2279 | 81/18866  | 0.0012663 | 0.062785  | 0.0568101 | 20 | CTSZ/SERPINA1/TGFA/STX5/CSNK1D/TRAPPC10/SEC23B/MYO18A/CUL3/TRAPPC9/MIA3/CNIH2/CD59/SEC13/ANKRD28/PRKCI/SEC24C/TMED2/SEC31A/TRAPPC2                                                                                                                                                                                                                                                                           |
| Biological Process | GO:0002822 | regulation of adaptive immune response based on somatic recombination of immune receptors built from immunoglobulin superfamily domains | 32/2279 | 153/18866 | 0.0012741 | 0.062785  | 0.0568101 | 32 | IL27/PRKCZ/FUT7/IL10/SLC11A1/TNFRSF1B/NLRP3/IL1R1/CCR2/TNF/TRAF2/TNFAIP3/LOXL3/TNFSF13B/DUSP22/CD226/HLA-F/PTPN6/SMAD7/ZBTB7B/TGFB1/RIPK3/PTPRC/TP53BP1/MEF2C/IL18R1/HLX/TNFSF13/FADD/PAXIP1/CYRIB/NSD2                                                                                                                                                                                                      |
| Biological Process | GO:0050995 | negative regulation of lipid catabolic process                                                                                          | 9/2279  | 24/18866  | 0.0012854 | 0.062785  | 0.0568101 | 9  | SORL1/MFSD2A/GPLD1/TNF/CRTC3/ACACB/PDE3B/BSCL2/PRKAA1                                                                                                                                                                                                                                                                                                                                                        |
| Biological Process | GO:1903306 | negative regulation of regulated secretory pathway                                                                                      | 9/2279  | 24/18866  | 0.0012854 | 0.062785  | 0.0568101 | 9  | ABR/RAP1B/CCR2/CD84/GNAI2/HLA-F/BCR/NOTCH1/CBARP                                                                                                                                                                                                                                                                                                                                                             |
| Biological Process | GO:0097191 | extrinsic apoptotic signaling pathway                                                                                                   | 44/2279 | 230/18866 | 0.0012886 | 0.062785  | 0.0568101 | 44 | LCN2/ITPRIP/TNFRSF1B/PIK3R1/SMAD3/CTTN/TNF/TRAF2/TNFAIP3/TRAF1/DEDD2/UNC5B/THBS1/RIPK1/TCF7L2/TNFRSF1A/FGFR1/TGFB1/NF1/HTT/PTPRC/ITM2C/BMPR1B/STK3/BCL10/IL6R/PPP2R1A/NOL3/TRPS1/SORT1/SGPP1/BCL2/PPP2R1B/SP100/ARHGEF2/BCL2L1/TNFSF12/CYLD/RELA/GOS2/SIVA1/INHBA/FADD/DAPK3                                                                                                                                 |
| Biological Process | GO:0010810 | regulation of cell-substrate adhesion                                                                                                   | 42/2279 | 217/18866 | 0.0012958 | 0.0628129 | 0.0568354 | 42 | PRKCZ/TBCD/P4HB/RREB1/TACSTD2/CALR/PLAU/SPOCK2/VIT/KANK1/RIN2/DOCK1/ITGB1BP1/PIK3R1/CEACAM6/SMAD3/ARHGEF7/DNM2/DUSP22/JUP/THBS1/DISC1/NINJ1/EGFLAM/ACTN4/ILK/PREX1/PTPRJ/NF1/OLFM4/ACTG1/PLEKHA2/CASS4/BCL2/NOTCH1/CORO1C/GCNT2/DUSP3/PRKCE/RSU1/MYADM/DAPK3                                                                                                                                                 |
| Biological Process | GO:0010631 | epithelial cell migration                                                                                                               | 64/2279 | 365/18866 | 0.0013445 | 0.0648262 | 0.058657  | 64 | S100P/RREB1/TACSTD2/FOXP1/CALR/NRP2/PPARG/KANK1/MAP3K3/MIR143/RIN2/HDAC7/ANGPT1/DOCK1/ITGB1BP1/PRKCA/MIR199A1/GPLD1/TNF/ZEB2/MIR101-2/SEMA4A/STAT5A/RTN4/JUP/TGFBR2/THBS1/MYH9/CTSH/AKT3/MIR24-2/MIR27A/MIR23A/MIA3/PXN/PLEKHG5/LTB4R2/FGFR1/TGFB1/ZNF580/IQSEC1/NF1/PFN1/BMPER/ITGB3/GRN/PDGF/ETS1/NFE2L2/ITGB2/VASH1/ARSB/MIR199A2/NOTCH1/CORO1C/MEF2C/PRKCE/SP100/TNFSF12/PLCG1/ADTRP/PAXIP1/ADGRA2/PLPP3 |
| Biological Process | GO:0043112 | receptor metabolic process                                                                                                              | 39/2279 | 198/18866 | 0.001351  | 0.0648262 | 0.058657  | 39 | LMTK2/SORL1/AP2A1/IL10/CD9/PPARG/ANGPT1/TBC1D16/ARRB1/DNM2/MIR199A1/RAB31/TNF/ARAP1/ANKRD13B/ANKRD13D/UVRAG/HDAC1/TGFB1/SMURF1/NUMB/ITGB3/ANKRD13A/CXCR1/GSG1L/ARRB2/ITGB2/DNM1/DNM3/MIR199A2/EPS15/NEDD4/MX1/INPP5F/EZR/FLOT1/MVB12A/PHETA1/GRK2                                                                                                                                                            |

|                    |            |                                                            |         |           |           |           |           |    |                                                                                                                                                                                                                                                                                                                                                                                                                                                                                                                                    |
|--------------------|------------|------------------------------------------------------------|---------|-----------|-----------|-----------|-----------|----|------------------------------------------------------------------------------------------------------------------------------------------------------------------------------------------------------------------------------------------------------------------------------------------------------------------------------------------------------------------------------------------------------------------------------------------------------------------------------------------------------------------------------------|
| Biological Process | GO:0002761 | regulation of myeloid leukocyte differentiation            | 27/2279 | 123/18866 | 0.0014033 | 0.0669997 | 0.0606237 | 27 | ZFPM1/FOXP1/CREB1/MIR145/RUNX1/INPP5D/PIK3R1/PRKCA/TNF/UBASH3B/TESC/RIPK1/TGFB1/CD101/RARA/TMEM178A/LILRB4/NF1/TMEM64/LRRC17/RB1/LTF/CEBPB/TRIB1/INHBA/LIF/FADD                                                                                                                                                                                                                                                                                                                                                                    |
| Biological Process | GO:0048660 | regulation of smooth muscle cell proliferation             | 35/2279 | 173/18866 | 0.0014367 | 0.0682526 | 0.0617574 | 35 | ELANE/HDAC4/FOXP1/IL10/PPARG/MIR140/MEF2D/MIR143/MIR145/MYB/ERN1/TNF/TNFAIP3/CCL5/TGFBR2/THBS1/COMT/GNAI2/MIR27A/TCF7L2/ILK/P2RY6/PHB/SF1/PDGFD/IL6R/PDGFB/DNMT1/MEF2C/NPPC/PDGFRB/VIPR2/TRIB1/NDRG2/CCN4                                                                                                                                                                                                                                                                                                                          |
| Biological Process | GO:0034138 | toll-like receptor 3 signaling pathway                     | 8/2279  | 20/18866  | 0.0014702 | 0.0688074 | 0.0622594 | 8  | TNFAIP3/RIPK1/COLEC12/SCIMP/WDFY1/FLOT1/FADD/PELI1                                                                                                                                                                                                                                                                                                                                                                                                                                                                                 |
| Biological Process | GO:0098884 | postsynaptic neurotransmitter receptor internalization     | 8/2279  | 20/18866  | 0.0014702 | 0.0688074 | 0.0622594 | 8  | DNM2/NUMB/ITGB3/GSG1L/DNM1/DNM3/EPS15/MX1                                                                                                                                                                                                                                                                                                                                                                                                                                                                                          |
| Biological Process | GO:0140239 | postsynaptic endocytosis                                   | 8/2279  | 20/18866  | 0.0014702 | 0.0688074 | 0.0622594 | 8  | DNM2/NUMB/ITGB3/GSG1L/DNM1/DNM3/EPS15/MX1                                                                                                                                                                                                                                                                                                                                                                                                                                                                                          |
| Biological Process | GO:0016311 | dephosphorylation                                          | 82/2279 | 492/18866 | 0.0014886 | 0.0690339 | 0.0624644 | 82 | LMTK2/SYNJ2/SSH1/CTDP1/PTPRE/LCK/INPP5A/MGAT5/PPP1R1B/INPP5D/URI1/PFKFB4/DUSP14/SMAD3/CABIN1/GPLD1/TNF/UBASH3B/PHLPP1/DUSP22/PGP/ACP6/CTDSPL/CCDC8/ALPL/INPP4A/GNAI2/PTPN6/CAMTA1/SSH3/ELFN2/RCAN1/SMG7/PHACTR2/DUSP28/PTPRN2/CDC25A/TGFB1/FARP1/PTPRJ/SEMA4D/PPP2R5C/RIPK3/LRRK1/HTT/PTPRC/SMG6/PPP2R1A/INPP5E/PALD1/PPP1CB/IMPA2/PPP2R5E/PPP2R5D/DAPP1/SGPP1/CA3/SGPP2/BCL2/MEF2C/DUSP3/PPP2R1B/PDGFRB/WDR81/PPP1R16B/RPRD1B/CDC14A/NT5DC3/FBXW11/CD33/SPOCD1/ANKLE2/LHPP/INPP5F/PPM1N/PTPRU/LPIN1/PFKFB3/ACP3/PTPA/PLPP3/PXYLP1 |
| Biological Process | GO:0070278 | extracellular matrix constituent secretion                 | 6/2279  | 12/18866  | 0.0014902 | 0.0690339 | 0.0624644 | 6  | TNFRSF1B/TNFRSF1A/ENG/NOTCH1/CPB2/ADTRP                                                                                                                                                                                                                                                                                                                                                                                                                                                                                            |
| Biological Process | GO:0002687 | positive regulation of leukocyte migration                 | 30/2279 | 142/18866 | 0.0015041 | 0.0690339 | 0.0624644 | 30 | ELANE/FUT4/CALR/FUT7/C3AR1/IL1R1/CCR2/TNF/CCL5/CSF1R/FPR2/THBS1/APP/ITGA2B/MIA3/DEFB124/DOCK8/ZNF580/PDGFD/CAMK1D/CXCL17/CCL20/IL6R/DAPK2/DNM1L/ANO6/DYSF/CCL27/CX3CR1/FADD                                                                                                                                                                                                                                                                                                                                                        |
| Biological Process | GO:0031333 | negative regulation of protein-containing complex assembly | 30/2279 | 142/18866 | 0.0015041 | 0.0690339 | 0.0624644 | 30 | VILL/PRKCZ/TBCD/SORL1/SSH1/GSN/KANK1/ULK1/LDLRAD4/MEFV/CAPG/SSH3/CLU/TMOD3/SVIL/PFN1/JAM3/SPTA1/ADD1/AVIL/FLII/ARHGEF2/SPTAN1/TMOD1/LMO4/MYADM/SPBN4/SVIP/TFIP11/CYRIB                                                                                                                                                                                                                                                                                                                                                             |

|                    |            |                                          |         |           |           |           |           |    |                                                                                                                                                                                                                                                                                                                                                                                                                     |
|--------------------|------------|------------------------------------------|---------|-----------|-----------|-----------|-----------|----|---------------------------------------------------------------------------------------------------------------------------------------------------------------------------------------------------------------------------------------------------------------------------------------------------------------------------------------------------------------------------------------------------------------------|
| Biological Process | GO:0018108 | peptidyl-tyrosine phosphorylation        | 65/2279 | 374/18866 | 0.0015563 | 0.0706411 | 0.0639186 | 65 | PRKCZ/AATK/LMTK2/DYRK4/TGFA/SH3BP5L/BAZ1B/TTN/LCK/HIPK3/MAP2K6/ANGPT1/FGR/TNF/CCL5/CSF1R/NCK2/EPHB3/SH3BP5/HIPK2/DUSP22/CAMKK2/SLA/APP/PTPN6/TNFRSF1A/IGF1R/FLT1/JAK1/FGFR1/TGFB1/FER/PTPRJ/CLK3/SEMA4D/DGKQ/PDGF/D/LRRK1/DYRK2/BLK/CSF3/TESK2/ITGB3/GHRL/PTPRC/CSK/IL6R/PDGFB/PPP2R1A/CASS4/ARRB2/ITGB2/NTRK1/INSRR/PRKCE/GGNBP2/BANK1/PDGFC/ARHGEF2/PDGFRB/TYRO3/INPP5F/CRLF1/PARP9/LIF                           |
| Biological Process | GO:0090130 | tissue migration                         | 65/2279 | 374/18866 | 0.0015563 | 0.0706411 | 0.0639186 | 65 | S100P/RREB1/TACSTD2/FOXP1/CALR/NRP2/PPARG/KANK1/MAP3K3/MIR143/RIN2/HDAC7/ANGPT1/DOCK1/ITGB1BP1/PRKCA/MIR199A1/GLPD1/TNF/ZEB2/MIR101-2/SEMA4A/STAT5A/RTN4/JUP/TGFBR2/THBS1/MYH9/CTSH/AKT3/MIR24-2/MIR27A/MIR23A/MIA3/PXN/PLEKHG5/LTB4R2/FGFR1/TGFB1/ZNF580/IQSEC1/NF1/PFN1/BMPER/ITGB3/GRHL2/GRN/PDGFB/ETS1/NFE2L2/ITGB2/VASH1/ARSB/MIR199A2/NOTCH1/CORO1C/MEF2C/PRKCE/SP100/TNFSF12/PLCG1/ADTRP/PAXIP1/ADGRA2/PLPP3 |
| Biological Process | GO:0060612 | adipose tissue development               | 13/2279 | 44/18866  | 0.0015614 | 0.0706411 | 0.0639186 | 13 | ARID5B/ZNF516/SORL1/SLC25A25/SPTLC2/LRP5L/SH3PXD2B/GHRL/FTO/KLF7/ACAT1/PAXIP1/SPART                                                                                                                                                                                                                                                                                                                                 |
| Biological Process | GO:0042908 | xenobiotic transport                     | 11/2279 | 34/18866  | 0.001569  | 0.0706492 | 0.0639259 | 11 | NR1I2/ABCC1/ABCC2/OSCP1/LRRC8C/RALBP1/SLC7A5/SLC22A5/ABCC3/SLC2A1/PDZK1                                                                                                                                                                                                                                                                                                                                             |
| Biological Process | GO:0006672 | ceramide metabolic process               | 23/2279 | 100/18866 | 0.0016059 | 0.071806  | 0.0649727 | 23 | PLA2G15/FUT7/SPTLC2/HEXB/GALC/TNF/ORMDL3/CERS6/TNFRSF1A/SPHK2/SGMS1/ST8SIA6/PPP2R1A/SGMS2/B4GALT3/P2RX1/FA2H/CERS2/CERK/SIRT3/PRKAA1/TLCD3B/PLPP3                                                                                                                                                                                                                                                                   |
| Biological Process | GO:0001841 | neural tube formation                    | 24/2279 | 106/18866 | 0.0016174 | 0.071806  | 0.0649727 | 24 | SHROOM3/SKI/SETD2/SPINT2/MTHFD1L/SUFU/ZEB2/MIB1/PAX2/TGFB1/RARA/PFN1/RARG/STK3/GRHL2/BCL10/MTHFD1/RALA/TMED2/TSC2/TEAD2/LMO4/NODAL/BRD2                                                                                                                                                                                                                                                                             |
| Biological Process | GO:0046632 | alpha-beta T cell differentiation        | 24/2279 | 106/18866 | 0.0016174 | 0.071806  | 0.0649727 | 24 | IL27/PRKCZ/ZFPM1/FOXP1/FUT7/MYB/RUNX1/NLRP3/ITPKB/LOXL3/SEMA4A/ZBTB16/TGFBR2/SMAD7/LY9/ZBTB7B/RARA/PNP/BCL2/IL18R1/HLX/RUNX3/AP3D1/BCL3                                                                                                                                                                                                                                                                             |
| Biological Process | GO:0031032 | actomyosin structure organization        | 39/2279 | 200/18866 | 0.0016382 | 0.0723948 | 0.0655054 | 39 | ARHGEF10/TACSTD2/TTN/CASQ2/MYH11/AKAP13/ITGB1BP1/PIK3R1/SMAD3/ARRB1/MYO18A/SH3PXD2B/TNNT3/ARAP1/CUL3/MYH9/SYNPO2L/PXN/WNT11/ITGB5/PPFIA1/TMOD3/FRMD3/PFN1/EPB41L3/ACTG1/WDR1/MIR138-2/ARHGEF10L/ARHGEF18/MEF2C/FLII/PDGFRB/ARHGEF15/CDC42BPB/ANKRD1/FRMD6/TMOD1/CASQ1                                                                                                                                               |
| Biological Process | GO:0045619 | regulation of lymphocyte differentiation | 36/2279 | 181/18866 | 0.0016951 | 0.0745605 | 0.067465  | 36 | IL27/PRKCZ/RHOH/MYB/RUNX1/INPP5D/NLRP3/ITPKB/CCR2/PIK3R6/LOXL3/NFATC2/FBXO7/TLR9/ZBTB16/TGFBR2/PTPN6/SMAD7/ZMIZ1/ZBTB7B/FANCA/RARA/LILRB4/ZC3H8/PGLYRP1/PTPRC/CLPTM1/PNP/HLX/RUNX3/CYLD/AP3D1/INHBA/PCID2/TMEM131L/V SIR                                                                                                                                                                                            |



|                    |            |                                                             |         |           |           |           |           |    |                                                                                                                                                                                                                                                                                                   |
|--------------------|------------|-------------------------------------------------------------|---------|-----------|-----------|-----------|-----------|----|---------------------------------------------------------------------------------------------------------------------------------------------------------------------------------------------------------------------------------------------------------------------------------------------------|
| Biological Process | GO:0046578 | regulation of Ras protein signal transduction               | 38/2279 | 194/18866 | 0.0017147 | 0.0750732 | 0.0679289 | 38 | ARHGEF10/TIMP2/KANK1/DENND1A/AKAP13/MYO9B/ARHGDI8/ITPKB/ARRB1/DNM2/DENND3/CUL3/LRRC59/SYNPO2L/RASA3/SYNGAP1/EP8L3/IQSEC1/EP8L1/NF1/ABCA1/BCR/A<br>RHGEF25/NTRK1/ARHGEF18/NOTCH1/CYTH4/ARHGAP17/F2R/ARHGEF28/FOXM1/ARHGEF2/GPR4/PDGFRB/RALGPS1/FLOT1/FBXO8/PRAG1                                   |
| Biological Process | GO:0035697 | CD8-positive, alpha-beta T cell extravasation               | 3/2279  | 3/18866   | 0.0017607 | 0.075142  | 0.0679912 | 3  | CCR2/RIPK3/FADD                                                                                                                                                                                                                                                                                   |
| Biological Process | GO:1904578 | response to thapsigargin                                    | 3/2279  | 3/18866   | 0.0017607 | 0.075142  | 0.0679912 | 3  | CLU/FIS1/DNM1L                                                                                                                                                                                                                                                                                    |
| Biological Process | GO:1904579 | cellular response to thapsigargin                           | 3/2279  | 3/18866   | 0.0017607 | 0.075142  | 0.0679912 | 3  | CLU/FIS1/DNM1L                                                                                                                                                                                                                                                                                    |
| Biological Process | GO:2000449 | regulation of CD8-positive, alpha-beta T cell extravasation | 3/2279  | 3/18866   | 0.0017607 | 0.075142  | 0.0679912 | 3  | CCR2/RIPK3/FADD                                                                                                                                                                                                                                                                                   |
| Biological Process | GO:0048659 | smooth muscle cell proliferation                            | 35/2279 | 175/18866 | 0.0017659 | 0.075142  | 0.0679912 | 35 | ELANE/HDAC4/FOXP1/IL10/PPARG/MIR140/MEF2D/MIR143/MIR145/MYB/ERN1/TNF/TNFAIP3/CCL5/TGFBR2/THBS1/COMT/GNAI2/MIR27A/TCF7L2/ILK/P2RY6/PHB/SF1/PDGFR/IL6<br>R/PDGFR/DNMT1/MEF2C/NPPC/PDGFRB/VIPR2/TRIB1/NDRG2/CCN4                                                                                     |
| Biological Process | GO:0001890 | placenta development                                        | 32/2279 | 156/18866 | 0.0017766 | 0.075142  | 0.0679912 | 32 | BSG/RXRA/IL10/PPARG/VDR/SETD2/SPINT2/E2F7/HSD17B2/RBPJ/SP3/DNAJB6/DAZAP1/GHRL/STK3/GRHL2/NCOA1/PDGFR/CTSB/GJB3/VASH1/TPPP3/EPAS1/GGNBP2/STOX2/TMED2<br>/CEBPB/PCDH12/PLCD3/NODAL/LIF/ETNK2                                                                                                        |
| Biological Process | GO:0050870 | positive regulation of T cell activation                    | 41/2279 | 214/18866 | 0.0017928 | 0.075142  | 0.0679912 | 41 | HLA-<br>DMB/PRKCZ/RHOH/LCK/MYB/RUNX1/SIRPB1/CD55/NLRP3/PIK3R1/ITPKB/CCR2/PIK3R6/CCL5/GRAP2/NCK2/TNFSF13B/ZBTB16/TGFBR2/PTPN6/ZMIZ1/DOCK8/ZBTB7B/RARA/LILRB4/<br>CCDC88B/PTPRC/CSK/BCL10/SPTA1/PNP/NOD2/SIRPG/HLX/RUNX3/CYLD/AP3D1/SLC7A1/FADD/CYRIB/VSIR                                          |
| Biological Process | GO:0016358 | dendrite development                                        | 46/2279 | 247/18866 | 0.0017943 | 0.075142  | 0.0679912 | 46 | MFSD2A/YWHAH/ZMYND8/BTBD3/NCK2/EPHB3/BCL11A/ITSN1/SLC11A2/TNIK/DISC1/CUX1/BAIAP2/APP/ILK/PREX1/SDC2/ASAP1/WASL/SYNGAP1/FARP1/SEMA4D/RAPGEF2/SS18L2<br>/IQSEC1/ARID1B/CPEB3/CAMK1D/GHRL/SIPA1L1/MAPK8IP2/KLF7/DOCK10/DNM3/MAP1A/CDKL3/DNM1L/MEF2C/SHANK2/UBE3A/NEDD4/HECW2/CYFIP1/DTNBP1/CUX2/DBNL |

|                    |            |                                                       |         |           |           |           |           |    |                                                                                                                                                                                                                                                                                                                                                                                                                                                                                                                 |
|--------------------|------------|-------------------------------------------------------|---------|-----------|-----------|-----------|-----------|----|-----------------------------------------------------------------------------------------------------------------------------------------------------------------------------------------------------------------------------------------------------------------------------------------------------------------------------------------------------------------------------------------------------------------------------------------------------------------------------------------------------------------|
| Biological Process | GO:0036010 | protein localization to endosome                      | 9/2279  | 25/18866  | 0.0017953 | 0.075142  | 0.0679912 | 9  | SORL1/TOLLIP/TMEM30A/PACIN2/MGAT3/ANKRD13A/ZDHHC1/MICALL1/EZR                                                                                                                                                                                                                                                                                                                                                                                                                                                   |
| Biological Process | GO:0071677 | positive regulation of mononuclear cell migration     | 9/2279  | 25/18866  | 0.0017953 | 0.075142  | 0.0679912 | 9  | CCR2/TNF/CCL5/FPR2/DEFB124/PDGFD/CXCL17/ANO6/CCL27                                                                                                                                                                                                                                                                                                                                                                                                                                                              |
| Biological Process | GO:0051283 | negative regulation of sequestering of calcium ion    | 26/2279 | 119/18866 | 0.0018265 | 0.0757813 | 0.0685696 | 26 | TRPM2/PDE4D/CASQ2/ITPR2/LCK/CACNA1C/SLC8A1/ANXA6/UBASH3B/ITPR1/JSRP1/PTPN6/RASA3/P2RY6/MYO5A/HTT/PTPRC/NOL3/TPCN2/GSTO1/PRKCE/F2R/ANK2/CHERP/PLCG1/CASQ1                                                                                                                                                                                                                                                                                                                                                        |
| Biological Process | GO:0071706 | tumor necrosis factor superfamily cytokine production | 26/2279 | 119/18866 | 0.0018265 | 0.0757813 | 0.0685696 | 26 | TRIM27/FOXP1/IL10/MIR140/ANGPT1/PIK3R1/TNFAIP3/TLR9/SPON2/RIPK1/C5AR2/APP/PTPN6/CLU/SPHK2/PTPRJ/RARA/PTPRC/ARRB2/NOD2/ARHGEF2/LTF/CD33/FADD/VSIR/ILR1                                                                                                                                                                                                                                                                                                                                                           |
| Biological Process | GO:0046834 | lipid phosphorylation                                 | 18/2279 | 72/18866  | 0.0018667 | 0.0771107 | 0.0697725 | 18 | PIK3CD/PIP5K1B/PIK3R1/ITPKB/PIK3R6/TTC7A/PIP4K2A/SPHK2/TTC7B/DGKQ/DGKA/DGKD/IMPA2/PI4K2A/PI4KA/CERK/IP6K1/SLA2                                                                                                                                                                                                                                                                                                                                                                                                  |
| Biological Process | GO:0050804 | modulation of chemical synaptic transmission          | 76/2279 | 454/18866 | 0.0019233 | 0.0788411 | 0.0713382 | 76 | PRKCZ/ABR/SSH1/RNF19A/SORCS2/CREB1/YWHAH/PRKAR1B/ZMYND8/RAP1B/CCR2/TNF/PACIN2/DISC1/GIT1/BAIAP2/ZDHHC2/GNAI2/APP/SYN3/AKAP5/GRIK4/APBA2/PLEKHG5/SYNGAP1/NISCH/DLGAP4/RAPGEF2/HRH1/PRKCB/CNIH2/RARA/MCTP2/NF1/NRXN1/VPS18/CPEB3/GHRL/CHRM2/SH3GL1/BCR/CNR2/SIPA1L1/PLCB1/BEGAIN/MAPK8IP2/ARRB2/DNM1/PLCL1/NTRK1/CDH1/SLC1A3/S1PR2/MAP1A/P2RX1/DNM1L/MEF2C/SHANK2/PRKCE/F2R/CACNA1B/PLCG1/CYFIP1/CDH11/NPTX1/GRID1/FLOT1/DTNBP1/AKAP7/NTF4/CX3CR1/CUX2/SYNPO/FGF14/LRFN2/PRKN                                     |
| Biological Process | GO:1901653 | cellular response to peptide                          | 68/2279 | 398/18866 | 0.0019252 | 0.0788411 | 0.0713382 | 68 | PRKCZ/KLF1/SORL1/FUT7/PPARG/ADCY2/MIR140/KANK1/ABCC1/CREB1/PTPRE/MIR143/MIR145/PRKAR1B/ADCY9/PIK3R1/RAP1B/GPLD1/RAB31/FPR2/STAT5A/BAIAP2L1/BAIAP2/GRB10/GNAI2/APP/ATP6V1B2/ZDHHC7/PXN/IGF1R/ZBTB7B/CRHBP/FER/PRKCB/POR/MYO5A/ARID1B/GHRL/CSK/AGTRAP/PRKCI/NFE2L2/ADCY4/INSRR/NOD2/FIS1/PKM/ATP6V0B/ARHGEF2/BCAR3/PCK2/AGTR1/MYO1C/TSC2/FOXO1/MBD5/SOGA1/SREBF1/PDE3B/CYFIP1/RELA/WDC1/NDEL1/LPIN1/PRKAA1/MARS1/ATP6VOC/ATP6V1C1                                                                                 |
| Biological Process | GO:0006816 | calcium ion transport                                 | 72/2279 | 426/18866 | 0.0019335 | 0.0788411 | 0.0713382 | 72 | TRPM2/PDE4D/TRIM27/RCVRN/SLC25A25/THADA/IL16/CASQ2/ITPR2/LCK/CACNA1C/CACNA2D4/SLC24A4/VDR/MYLK/SLC8A1/PKD1L1/ANXA6/UBASH3B/CDH23/CCL5/SPG7/CD84/TLR9/ATP2B2/ITPR1/BIN1/TRPM6/JSRP1/AHNAK/GNAI2/NOS1AP/PTPN6/RASA3/P2RY6/SPHK2/PHB/PRKCB/MYO5A/HTT/PTPRC/ATP2A3/PDGFB/NOL3/TPCN2/ARRB2/TRPM3/BCL2/GSTO1/P2RX1/DNM1L/PRKCE/TMEM37/F2R/TMC1/PDGFRB/ANO6/DYSF/CACNA1B/ANK2/CHERP/PLCG1/P2RX5/TRPV2/CD33/CASQ1/FGF14/GRAMD2A/CBARP/STIMATE/SARAF/CRACR2A                                                             |
| Biological Process | GO:0016049 | cell growth                                           | 81/2279 | 490/18866 | 0.0020022 | 0.0812964 | 0.0735599 | 81 | SEMA6B/PRKCZ/S100A8/RPTOR/CPNE6/CDA/ENO1/NRP2/PPARG/CTDP1/RPS6KA1/SERTAD2/MFSD2A/ULK1/APBB2/EXOSC2/URI1/AKAP13/PRMT2/SMAD3/CTTN/DNM2/MIR199A1/CPNE5/ZEB2/CYFIP2/SGK1/BCL11A/VGLL4/SEMA4A/RTN4/KRT17/TGFBR2/MEG3/DISC1/SLC44A4/SEMA4B/APP/MIR24-2/MIR23A/DERL2/SMARCA2/IFRD1/MUC12/ILK/SMAD7/CPNE1/WNT11/SPHK2/TGFB1/PHB/PTPRJ/SEMA4D/RERG/SMURF1/CHPT1/KMT2D/EPB41L3/CDHR2/RARG/CDH4/SH3BP4/PP2R1A/RB1/BCL2/MIR199A2/CDKL3/SYT17/SLIT3/AGTR1/CYFIP1/TRPV2/SGK2/NDEL1/SLIT1/SCGB3A1/INHBA/EIF4G1/DBNL/SPART/PRKN |

|                    |            |                                                                |         |           |           |           |           |    |                                                                                                                                                                                                                                                                                                                                                                                                                                                                             |
|--------------------|------------|----------------------------------------------------------------|---------|-----------|-----------|-----------|-----------|----|-----------------------------------------------------------------------------------------------------------------------------------------------------------------------------------------------------------------------------------------------------------------------------------------------------------------------------------------------------------------------------------------------------------------------------------------------------------------------------|
| Biological Process | GO:0030279 | negative regulation of ossification                            | 20/2279 | 84/18866  | 0.0020312 | 0.0814848 | 0.0737304 | 20 | HDAC4/HDAC7/SKI/CHSY1/SMAD3/SUFU/TNF/RBPJ/LIMD1/SMAD7/KREMEN1/SEMA4D/SMURF1/TMEM64/KREMEN2/MIR138-2/BCL2/NOTCH1/MEF2C/RFLNA                                                                                                                                                                                                                                                                                                                                                 |
| Biological Process | GO:0099177 | regulation of trans-synaptic signaling                         | 76/2279 | 455/18866 | 0.0020424 | 0.0814848 | 0.0737304 | 76 | PRKCZ/ABR/SSH1/RNF19A/SORCS2/CREB1/YWHAH/PRKAR1B/ZMYND8/RAP1B/CCR2/TNF/PACIN2/DISC1/GIT1/BAIAP2/ZDHHC2/GNAI2/APP/SYN3/AKAP5/GRIK4/APBA2/PLEKHG5/SYNGAP1/NISCH/DLGAP4/RAPGEF2/HRH1/PRKCB/CNIH2/RARA/MCTP2/NF1/NRXN1/VPS18/CPEB3/GHRL/CHRM2/SH3GL1/BCR/CNR2/SIPA1L1/PLCB1/BEGAIN/MAPK8IP2/ARRB2/DNM1/PLCL1/NTRK1/CDH1/SLC1A3/S1PR2/MAP1A/P2RX1/DNM1L/MEF2C/SHANK2/PRKCE/F2R/CACNA1B/PLCG1/CYFIP1/CDH11/NPTX1/GRID1/FLOT1/DTNBP1/AKAP7/NTF4/CX3CR1/CUX2/SYNPO/FGF14/LRFN2/PRKN |
| Biological Process | GO:0007030 | Golgi organization                                             | 31/2279 | 151/18866 | 0.0020475 | 0.0814848 | 0.0737304 | 31 | STX5/VTI1A/TANGO2/CSNK1D/RAB2A/SYNE1/ARHGEF7/DNM2/MYO18A/LMAN2/FAM174B/ATP8B1/COG1/RAB43/PDE4DIP/HTT/VCIPI1/NUMA1/USP6NL/GORASP2/ATP8B4/PI4K2A/YWHAZ/VMP1/UBXN2A/RAB30/TMED2/KIFC3/BAG5/VPS51/ARMH3                                                                                                                                                                                                                                                                         |
| Biological Process | GO:0055001 | muscle cell development                                        | 36/2279 | 183/18866 | 0.0020661 | 0.0814848 | 0.0737304 | 36 | HDAC4/CTDP1/MYO18B/TTN/CASQ2/MYH11/AKAP13/SKI/MAML1/SLC8A1/MIR199A1/NFATC2/TNNT3/BIN1/SMYD3/SYNPO2L/MIR24-2/MIR23A/TMOD3/ACTG1/WDR1/ENG/BCL2/MIR199A2/NOTCH1/MEF2C/FHL2/FLII/PDGFRB/DYSF/ANK2/ANKRD1/TMOD1/CASQ1/SYPL2/MYORG                                                                                                                                                                                                                                                |
| Biological Process | GO:0120032 | regulation of plasma membrane bounded cell projection assembly | 36/2279 | 183/18866 | 0.0020661 | 0.0814848 | 0.0737304 | 36 | HDAC4/TRPM2/TACSTD2/DEF8/CDKL1/KANK1/ZMYND8/RHOG/PLD1/DNM2/ARAP1/CDC42EP1/ATP8B1/CEP135/WASL/FER/SH3YL1/EP8L3/EP8L1/PFN1/ESPN/HTT/IFT140/PALM/PLEKHM1/SDCCAG8/NCKAP1/RALA/DNM3/CORO1C/AVIL/PPP1R16B/CYLD/CYFIP1/NDEL1/SEPTIN9                                                                                                                                                                                                                                               |
| Biological Process | GO:0034332 | adherens junction organization                                 | 17/2279 | 67/18866  | 0.002079  | 0.0814848 | 0.0737304 | 17 | TBCD/CADM3/JUP/SMAD7/CDH3/PLEKHA7/JAM3/NUMB/CSK/CDH4/CDH1/ADD1/CADM1/CDH11/KIFC3/NECTIN1/NECTIN4                                                                                                                                                                                                                                                                                                                                                                            |
| Biological Process | GO:0043550 | regulation of lipid kinase activity                            | 17/2279 | 67/18866  | 0.002079  | 0.0814848 | 0.0737304 | 17 | PIK3R1/PIK3R6/FGR/FPR2/PIK3R5/FLT1/TGFB1/VAV2/ATG14/PDGFRB/MIR138-2/NOD2/RB1/PDGFRB/WDR81/VAV3/SLA2                                                                                                                                                                                                                                                                                                                                                                         |
| Biological Process | GO:0031529 | ruffle organization                                            | 15/2279 | 56/18866  | 0.0020996 | 0.0814848 | 0.0737304 | 15 | TACSTD2/DEF8/KANK1/RHOG/CSF1R/SH3YL1/EP8L3/EP8L1/PFN1/PLEKHM1/CORO1C/PDGFRB/CYFIP1/NDEL1/DBNL                                                                                                                                                                                                                                                                                                                                                                               |
| Biological Process | GO:0006024 | glycosaminoglycan biosynthetic process                         | 24/2279 | 108/18866 | 0.0021126 | 0.0814848 | 0.0737304 | 24 | CSGALNACT1/AP2A1/HS3ST3B1/DSE/ANGPT1/CHSY1/CHST11/CHST15/NDST1/CHST2/SDC2/XYLTI1/TGFB1/B4GALT7/PDGFRB/ST3GAL4/B4GALT3/GCNT2/PDGFRB/HAS3/ST3GAL2/B3GNT2/B4GAT1/PXYLP1                                                                                                                                                                                                                                                                                                        |

|                    |            |                                                          |         |           |           |           |           |    |                                                                                                                                                                                                                                                                                                                                                                                                                                                                                |
|--------------------|------------|----------------------------------------------------------|---------|-----------|-----------|-----------|-----------|----|--------------------------------------------------------------------------------------------------------------------------------------------------------------------------------------------------------------------------------------------------------------------------------------------------------------------------------------------------------------------------------------------------------------------------------------------------------------------------------|
| Biological Process | GO:0003418 | growth plate cartilage chondrocyte differentiation       | 5/2279  | 9/18866   | 0.0021184 | 0.0814848 | 0.0737304 | 5  | ANXA6/TGFBR2/POC1A/RARG/NPPC                                                                                                                                                                                                                                                                                                                                                                                                                                                   |
| Biological Process | GO:0010692 | regulation of alkaline phosphatase activity              | 5/2279  | 9/18866   | 0.0021184 | 0.0814848 | 0.0737304 | 5  | SMAD3/GPLD1/TNF/SEMA4D/MEF2C                                                                                                                                                                                                                                                                                                                                                                                                                                                   |
| Biological Process | GO:0071550 | death-inducing signaling complex assembly                | 5/2279  | 9/18866   | 0.0021184 | 0.0814848 | 0.0737304 | 5  | TNF/TRAF2/RIPK1/TNFRSF1A/FADD                                                                                                                                                                                                                                                                                                                                                                                                                                                  |
| Biological Process | GO:1900045 | negative regulation of protein K63-linked ubiquitination | 5/2279  | 9/18866   | 0.0021184 | 0.0814848 | 0.0737304 | 5  | OTUB2/MIR138-2/OTUB1/TRIP12/PARP10                                                                                                                                                                                                                                                                                                                                                                                                                                             |
| Biological Process | GO:0051651 | maintenance of location in cell                          | 41/2279 | 216/18866 | 0.0021457 | 0.0820971 | 0.0742844 | 41 | TRPM2/PDE4D/S100A8/SORL1/CALR/HK1/GSN/LCN2/CASQ2/ITPR2/LCK/SYNE1/CACNA1C/VPS13D/SLC8A1/ANXA6/UBASH3B/ITPR1/JSRP1/PTPN6/RASA3/UVRAG/P2RY6/MYO5A/HTT/HK2/PTPRC/NOL3/TPCN2/MORC3/GSTO1/PRKCE/SP100/F2R/ANK2/AP3D1/CHERP/PLCG1/ATP7B/BCL3/CASQ1                                                                                                                                                                                                                                    |
| Biological Process | GO:0002697 | regulation of immune effector process                    | 78/2279 | 470/18866 | 0.0021516 | 0.0820971 | 0.0742844 | 78 | HLA-<br>DMB/IL27/PRKCZ/ABR/FUT7/IL10/AIM2/TRIM38/C3AR1/MYB/CD55/CD177/TNFRSF1B/NLRP3/IL1R1/CCR2/PIK3R6/GAB2/FGR/TNF/TRAF2/TNFAIP3/MYO18A/LOXL3/CD84/TLR9/DUSP22/SPON2/C5AR2/CD226/HLA-F/PTPN6/CLU/SMAD7/SCIMP/SPHK2/ZBTB7B/TGFB1/PHB/FER/PTPRJ/NCR1/RARA/RIPK3/BLK/CD59/C1S/PGLYRP1/SEC14L1/SLC7A5/PTPRC/BCL10/GRN/BCR/ZDHHC1/ARRB2/ITGB2/IL18RAP/DNASE1L3/NOD2/TP53BP1/PRAM1/IL18R1/TRAF3IP2/CPB2/HLX/TNFSF13/C1QB/CADM1/CD96/HERC5/PARP9/FADD/PAXIP1/STING1/CYRIB/ILRUN/NSD2 |
| Biological Process | GO:0090114 | COPII-coated vesicle budding                             | 18/2279 | 73/18866  | 0.0022029 | 0.0837209 | 0.0757536 | 18 | CTSZ/SERPINA1/TGFA/STX5/CSNK1D/TRAPPC10/SEC23B/CUL3/TRAPPC9/MIA3/CNIH2/CD59/SEC13/ANKRD28/SEC24C/TMED2/SEC31A/TRAPPC2                                                                                                                                                                                                                                                                                                                                                          |
| Biological Process | GO:0030100 | regulation of endocytosis                                | 40/2279 | 210/18866 | 0.0022584 | 0.0854863 | 0.077351  | 40 | AP2A1/PPARG/ANKFY1/CD177/ANGPT1/AAK1/RAB5C/RAB5B/ARRB1/DNM2/MIR199A1/RAB31/ITSN1/PACSN2/STON1/BIN1/ANKRD13B/DLL1/MIB1/ACTN4/MIR27A/ANKRD13D/CLU/WASL/DGKQ/NR1H2/NUMB/ITGB3/ANKRD13A/SH3GL1/DGKD/GSG1L/ARRB2/DNM1/MIR199A2/DNM1L/TSC2/ANO6/RUFY1/FLOT1                                                                                                                                                                                                                          |
| Biological Process | GO:0032272 | negative regulation of protein polymerization            | 19/2279 | 79/18866  | 0.0022957 | 0.0865524 | 0.0783156 | 19 | VILL/TBCD/SSH1/GSN/KANK1/CAPG/SSH3/TMOD3/SVIL/PFN1/SPTA1/ADD1/AVIL/FLII/SPTAN1/TMOD1/MYADM/SPTBN4/CYRIB                                                                                                                                                                                                                                                                                                                                                                        |

|                    |            |                                                   |         |           |           |           |           |    |                                                                                                                                                                                                                                                                                                         |
|--------------------|------------|---------------------------------------------------|---------|-----------|-----------|-----------|-----------|----|---------------------------------------------------------------------------------------------------------------------------------------------------------------------------------------------------------------------------------------------------------------------------------------------------------|
| Biological Process | GO:0051282 | regulation of sequestering of calcium ion         | 26/2279 | 121/18866 | 0.0023389 | 0.0878338 | 0.0794752 | 26 | TRPM2/PDE4D/CASQ2/ITPR2/LCK/CACNA1C/SLC8A1/ANXA6/UBASH3B/ITPR1/JSRP1/PTPN6/RASA3/P2RY6/MYO5A/HTT/PTPRC/NOL3/TPCN2/GSTO1/PRKCE/F2R/ANK2/CHERP/PLCG1/CASQ1                                                                                                                                                |
| Biological Process | GO:0032609 | interferon-gamma production                       | 25/2279 | 115/18866 | 0.0023773 | 0.0887297 | 0.0802857 | 25 | IL27/PDE4D/TRIM27/ZFPM1/IRF8/IL10/SLC11A1/IL1R1/CCR2/TNF/TLR9/CD226/MIR24-2/RARA/RIPK3/PGLYRP1/SLC7A5/IL18RAP/IL18R1/CD96/BCL3/INHBA/FADD/CYRIB/VSIR                                                                                                                                                    |
| Biological Process | GO:0051897 | positive regulation of protein kinase B signaling | 35/2279 | 178/18866 | 0.0023814 | 0.0887297 | 0.0802857 | 35 | TGFA/PIK3CD/LCK/MIR143/CHI3L1/ANGPT1/PIK3AP1/ITGB1BP1/PIK3R1/RHOG/MIR199A1/TNF/ITSN1/RTN4/THBS1/PIK3R5/TCF7L2/ILK/CPNE1/IGF1R/FGFR1/TGFB1/PHB/PTPRJ/CSF3/STK3/PDGFB/ENG/ARRB2/MIR138-2/MIR199A2/GCNT2/PDGFRB/CX3CR1/MYORG                                                                               |
| Biological Process | GO:0001843 | neural tube closure                               | 21/2279 | 91/18866  | 0.0024006 | 0.0890158 | 0.0805446 | 21 | SHROOM3/SKI/SETD2/SPINT2/MTHFD1L/SUFU/ZEB2/PAX2/TGFB1/RARA/PFN1/RARG/GRHL2/BCL10/MTHFD1/RALA/TMED2/TSC2/TEAD2/LMO4/BRD2                                                                                                                                                                                 |
| Biological Process | GO:0033157 | regulation of intracellular protein transport     | 48/2279 | 264/18866 | 0.0024079 | 0.0890158 | 0.0805446 | 48 | SORL1/KCNE1/SH3TC2/TFDP1/PRR5L/TM9SF4/TMEM30A/YWHAH/ANGPT1/ITGB1BP1/PIK3R1/SETD2/SMAD3/SUFU/UBAC2/JUP/EDEM1/USP36/SNX3/ZDHHC2/TCF7L2/DERL2/ABLIM3/AKAP5/UBE2J2/TGFB1/NF1/EDEM2/NUMA1/ITGB2/YWHAZ/CDH1/FIS1/BCL2/TTC21B/CABP1/SP100/TP53BP2/MYO1C/MIEF1/SREBF1/YWHAQ/NDEL1/PDZK1/SVIP/PRKAA1/PRKN/RIPOR1 |
| Biological Process | GO:0033002 | muscle cell proliferation                         | 45/2279 | 244/18866 | 0.0024324 | 0.0893592 | 0.0808554 | 45 | ELANE/HDAC4/RXRA/FOXP1/IL10/PPARG/MIR140/MEF2D/MIR143/MIR145/MYB/ANGPT1/ERN1/MIR199A1/TNF/TNFAIP3/CCL5/VGLL4/TGFBR2/THBS1/COMT/RIPK1/GNAI2/RBPJ/MIR27A/TCF7L2/ILK/P2RY6/FGFR1/PHB/SF1/PDGFD/IL6R/PDGFB/MEIS1/MIR199A2/NOTCH1/DNMT1/MEF2C/NPPC/PDGFRB/VIPR2/TRIB1/NDRG2/CCN4                             |
| Biological Process | GO:0031579 | membrane raft organization                        | 9/2279  | 26/18866  | 0.0024548 | 0.0893592 | 0.0808554 | 9  | GSN/PACSIN2/PTPRC/NPC1/MIR138-2/FA2H/DOCK2/FLOT1/MYADM                                                                                                                                                                                                                                                  |
| Biological Process | GO:0034114 | regulation of heterotypic cell-cell adhesion      | 9/2279  | 26/18866  | 0.0024548 | 0.0893592 | 0.0808554 | 9  | IL10/LCK/CEACAM6/TNF/MBP/IL1RN/GCNT2/FLOT1/MYADM                                                                                                                                                                                                                                                        |
| Biological Process | GO:0070633 | transepithelial transport                         | 9/2279  | 26/18866  | 0.0024548 | 0.0893592 | 0.0808554 | 9  | ABCC1/GPLD1/ABCC2/ITPR1/P2RY6/AQP1/SLC1A2/SLC1A3/SLC23A1                                                                                                                                                                                                                                                |

|                    |            |                                                     |         |           |           |           |           |    |                                                                                                                                                                                                                                         |
|--------------------|------------|-----------------------------------------------------|---------|-----------|-----------|-----------|-----------|----|-----------------------------------------------------------------------------------------------------------------------------------------------------------------------------------------------------------------------------------------|
| Biological Process | GO:0042921 | glucocorticoid receptor signaling pathway           | 6/2279  | 13/18866  | 0.0024858 | 0.0894619 | 0.0809483 | 6  | CALR/YWHAH/PHB/ARNTL/PER1/NEDD4                                                                                                                                                                                                         |
| Biological Process | GO:0046348 | amino sugar catabolic process                       | 6/2279  | 13/18866  | 0.0024858 | 0.0894619 | 0.0809483 | 6  | NAGK/AMDHD2/CHI3L1/NPL/CHIT1/CHI3L2                                                                                                                                                                                                     |
| Biological Process | GO:1902563 | regulation of neutrophil activation                 | 6/2279  | 13/18866  | 0.0024858 | 0.0894619 | 0.0809483 | 6  | ABR/CD177/GRN/BCR/ITGB2/PRAM1                                                                                                                                                                                                           |
| Biological Process | GO:0046488 | phosphatidylinositol metabolic process              | 36/2279 | 185/18866 | 0.0025052 | 0.0894804 | 0.080965  | 36 | SYNJ2/PIK3CD/INPP5A/VAC14/PIP5K1B/INPP5D/PIK3R1/ITPKB/PIGL/PIK3R6/PIGU/GPLD1/CSF1R/FPR2/TTC7A/PIGN/PITPNM2/INPP4A/PIK3R5/PIP4K2A/PITPNM1/TTC7B/SH3YL1/PLEKHA2/PDGFB/INPP5E/PLCB1/IMPA2/PI4K2A/PI4KA/PIGQ/PDGFRB/RUFY1/INPP5F/IP6K1/SLA2 |
| Biological Process | GO:0060491 | regulation of cell projection assembly              | 36/2279 | 185/18866 | 0.0025052 | 0.0894804 | 0.080965  | 36 | HDAC4/TRPM2/TACSTD2/DEF8/CDKL1/KANK1/ZMYND8/RHOG/PLD1/DNM2/ARAP1/CDC42EP1/ATP8B1/CEP135/WASL/FER/SH3YL1/EPS8L3/EP8L1/PFN1/ESPN/HTT/IFT140/PALM/PLEKHM1/SDCCAG8/NCKAP1/RALA/DNM3/CORO1C/AVIL/PPP1R16B/CYLD/CYFIP1/NDEL1/SEPTIN9          |
| Biological Process | GO:0051693 | actin filament capping                              | 12/2279 | 41/18866  | 0.0025549 | 0.0909127 | 0.0822611 | 12 | VILL/GSN/CAPG/TMOD3/SVIL/SPTA1/ADD1/AVIL/FLII/SPTAN1/TMOD1/SPTBN4                                                                                                                                                                       |
| Biological Process | GO:0071224 | cellular response to peptidoglycan                  | 4/2279  | 6/18866   | 0.0026026 | 0.0919243 | 0.0831764 | 4  | NLRP3/DEFB124/NOD2/RELA                                                                                                                                                                                                                 |
| Biological Process | GO:1903613 | regulation of protein tyrosine phosphatase activity | 4/2279  | 6/18866   | 0.0026026 | 0.0919243 | 0.0831764 | 4  | MGAT5/GNAI2/PTPRC/CD33                                                                                                                                                                                                                  |
| Biological Process | GO:0001893 | maternal placenta development                       | 11/2279 | 36/18866  | 0.0026235 | 0.092145  | 0.0833761 | 11 | BSG/RXRA/VDR/DAZAP1/GHRL/CTSB/TPPP3/STOX2/TMED2/NODAL/LIF                                                                                                                                                                               |

|                    |            |                                                     |         |           |           |           |           |    |                                                                                                                                                                                                                                               |
|--------------------|------------|-----------------------------------------------------|---------|-----------|-----------|-----------|-----------|----|-----------------------------------------------------------------------------------------------------------------------------------------------------------------------------------------------------------------------------------------------|
| Biological Process | GO:0010811 | positive regulation of cell-substrate adhesion      | 26/2279 | 122/18866 | 0.002638  | 0.092145  | 0.0833761 | 26 | PRKCZ/P4HB/RREB1/CALR/SPOCK2/VIT/RIN2/DOCK1/ITGB1BP1/CEACAM6/SMAD3/ARHGEF7/DNM2/JUP/DISC1/NINJ1/EGFLAM/ILK/PREX1/PTPRJ/OLFM4/PLEKHA2/CASS4/PRKCE/RSU1/MYADM                                                                                   |
| Biological Process | GO:1990266 | neutrophil migration                                | 26/2279 | 122/18866 | 0.002638  | 0.092145  | 0.0833761 | 26 | PRTN3/PDE4D/S100A8/FUT7/C3AR1/PIK3CD/RHOH/CSF3R/CD177/IL1R1/RHOG/CCL5/C5AR2/PREX1/JAM3/CAMK1D/CCL20/CXCR1/WDR1/ITGB2/DAPK2/DNM1L/DYSF/CCL22/VAV3/JAML                                                                                         |
| Biological Process | GO:0051701 | interaction with host                               | 40/2279 | 212/18866 | 0.0026963 | 0.0938359 | 0.0849061 | 40 | TRIM27/P4HB/RXRA/TRIM38/GSN/TRIM8/WWP2/SLC10A1/ULK1/CD55/TRIM10/SLC1A5/HIPK2/CLEC5A/SNX3/UVRAG/ITGB5/PC/PABPN1/PHB/FCN1/TRIM5/VPS18/TNIP1/ITGB3/CTSB/TPCN2/NPC1/CDH1/SLC52A2/EPS15/BCL2L1/TYRO3/CPSF4/ITGB6/SIVA1/TRIM26/GRK2/NECTIN1/NECTIN4 |
| Biological Process | GO:0032680 | regulation of tumor necrosis factor production      | 24/2279 | 110/18866 | 0.0027313 | 0.094029  | 0.0850808 | 24 | TRIM27/FOXP1/IL10/MIR140/ANGPT1/PIK3R1/TNFAIP3/TLR9/SPON2/RIPK1/C5AR2/PTPN6/CLU/PTPRJ/RARA/PTPRC/ARRB2/NOD2/ARHGEF2/LTF/CD33/FADD/V SIR/ILRUN                                                                                                 |
| Biological Process | GO:0046635 | positive regulation of alpha-beta T cell activation | 16/2279 | 63/18866  | 0.002748  | 0.094029  | 0.0850808 | 16 | PRKCZ/MYB/RUNX1/CD55/NLRP3/ITPKB/CCR2/ZBTB16/TGFBR2/ZBTB7B/RARA/PTPRC/PNP/HLX/RUNX3/AP3D1                                                                                                                                                     |
| Biological Process | GO:0002367 | cytokine production involved in immune response     | 23/2279 | 104/18866 | 0.0027592 | 0.094029  | 0.0850808 | 23 | PRKCZ/IL10/CD55/SLC11A1/TNFRSF1B/NLRP3/IL1R1/CCR2/TNF/traf2/SPON2/CD226/HLA-F/SMAD7/SCIMP/SPHK2/TGFB1/SLC7A5/BCL10/IL18RAP/NOD2/IL18R1/CD96                                                                                                   |
| Biological Process | GO:0032649 | regulation of interferon-gamma production           | 23/2279 | 104/18866 | 0.0027592 | 0.094029  | 0.0850808 | 23 | IL27/PDE4D/ZFPM1/IRF8/IL10/SLC11A1/IL1R1/CCR2/TNF/TLR9/CD226/MIR24-2/RARA/RIPK3/PGLYRP1/SLC7A5/IL18R1/CD96/BCL3/INHBA/FADD/CYRIB/V SIR                                                                                                        |
| Biological Process | GO:0042147 | retrograde transport, endosome to Golgi             | 21/2279 | 92/18866  | 0.0027636 | 0.094029  | 0.0850808 | 21 | TRIM27/DCTN1/STX5/VTI1A/ANKFY1/VPS53/HEATR5A/TRAPPC10/TBC1D10A/ERC1/SNX3/VPS26B/UBE2O/NUMA1/TBC1D14/SGSM2/CLN5/VPS51/CLTCL1/PHETA1/PRKN                                                                                                       |
| Biological Process | GO:0060606 | tube closure                                        | 21/2279 | 92/18866  | 0.0027636 | 0.094029  | 0.0850808 | 21 | SHROOM3/SKI/SETD2/SPINT2/MTHFD1L/SUFU/ZEB2/PAX2/TGFB1/RARA/PFN1/RARG/GRHL2/BCL10/MTHFD1/RALA/TMED2/TSC2/TEAD2/LMO4/BRD2                                                                                                                       |

|                    |            |                                                               |         |           |           |           |           |    |                                                                                                                                                                                                                                                                                                                                                                                                      |
|--------------------|------------|---------------------------------------------------------------|---------|-----------|-----------|-----------|-----------|----|------------------------------------------------------------------------------------------------------------------------------------------------------------------------------------------------------------------------------------------------------------------------------------------------------------------------------------------------------------------------------------------------------|
| Biological Process | GO:0014020 | primary neural tube formation                                 | 22/2279 | 98/18866  | 0.0027711 | 0.094029  | 0.0850808 | 22 | SHROOM3/SKI/SETD2/SPINT2/MTHFD1L/SUFU/ZEB2/PAX2/TGFB1/RARA/PFN1/RARG/GRHL2/BCL10/MTHFD1/RALA/TMED2/TSC2/TEAD2/LMO4/NODAL/BRD2                                                                                                                                                                                                                                                                        |
| Biological Process | GO:0042493 | response to drug                                              | 67/2279 | 397/18866 | 0.0028137 | 0.0951336 | 0.0860802 | 67 | HDAC4/TIMP2/CALR/IL10/AIM2/PPARG/NR1I2/LCN2/ACSL1/ABCC1/CREB1/LCK/MAP2K6/TMEM30A/RAP1B/SLC8A1/ARRB1/GPLD1/NFATC2/ABCC2/TGFBR2/RECQL5/THBS1/COMT/DC/ATP8B1/FECH/CDH3/CRHBP/SLC19A1/AQP1/POR/ENO3/SLC1A2/PARP4/ABCA1/NCOA1/ACACB/CAT/KCNQ1/PNP/PPOX/NFE2L2/ENG/ABCC3/NPC1/NTRK1/CDH1/SLC1A3/BCL2/MEF2C/GNA12/CPB2/CHEK2/NPPC/BCAR3/ANKRD1/HMGCS1/SREBF1/RELA/CPT1A/RPH3AL/DHODH/HSD11B2/INHBA/SST/VAV3 |
| Biological Process | GO:0030217 | T cell differentiation                                        | 46/2279 | 253/18866 | 0.0029243 | 0.0981765 | 0.0888336 | 46 | IL27/PRKCZ/ZFPM1/FOXP1/FUT7/PIK3CD/RHOH/LCK/MYB/RUNX1/NLRP3/ITPKB/CCR2/PIK3R6/LOXL3/NFATC2/SEMA4A/ZBTB16/TGFBR2/PREX1/SMAD7/ZMIZ1/LY9/CCR9/ZBTB7B/FANCA/RARA/RIPK3/LILRB4/ZC3H8/SP3/PTPRC/RUNX2/CLPTM1/PNP/BCL2/IL18R1/HLX/RUNX3/CYLD/DOCK2/AP3D1/BCL3/FADD/TMEM131L/VSIR                                                                                                                            |
| Biological Process | GO:0051924 | regulation of calcium ion transport                           | 46/2279 | 253/18866 | 0.0029243 | 0.0981765 | 0.0888336 | 46 | PDE4D/TRIM27/RCVRN/THADA/IL16/CASQ2/CACNA1C/MYLK/SLC8A1/UBASH3B/CCL5/CD84/TLR9/BIN1/JSRP1/AHNAK/GNAI2/NOS1AP/PTPN6/P2RY6/SPHK2/MYO5A/HTT/PDGFB/ARB2/BCL2/GSTO1/P2RX1/PRKCE/F2R/TMC1/PDGFRB/DYSF/CACNA1B/ANK2/PLCG1/P2RX5/TRPV2/CD33/CASQ1/FGF14/GRAMD2A/CBARP/STIMATE/SARAF/CRACR2A                                                                                                                  |
| Biological Process | GO:0043405 | regulation of MAP kinase activity                             | 59/2279 | 342/18866 | 0.0029524 | 0.0984362 | 0.0890686 | 59 | ELANE/KSR1/SPRED2/SORL1/TGFA/MAP3K3/HIPK3/MAP2K6/AKAP13/ERN1/DUSP14/PIK3R6/ARRB1/LAX1/TNF/ZEB2/TRAF2/FPR1/TLR9/TNIK/THBS1/PIK3R5/RIPK1/PTPN6/ILK/IGF1R/FLT1/FGFR1/TGFB1/PTPRJ/NF1/PDGFD/UBE2V1/MUC20/CXCL17/GHRL/PTPRC/CSK/PDE6H/PDGFB/PPP2R1A/MAP3K14/TAOK3/IRAK2/NTRK1/RGS3/NOD2/S1PR2/DUSP3/F2R/PDGF C/MAPKAPK3/PDGFRB/GADD45G/TRIB1/DTNBP1/DBNL/PRKAA1/MAP3K20                                   |
| Biological Process | GO:0010888 | negative regulation of lipid storage                          | 8/2279  | 22/18866  | 0.0029902 | 0.0984362 | 0.0890686 | 8  | PNPLA2/PPARG/TNF/ABCG1/NR1H2/ITGB3/ABCA1/ABHD5                                                                                                                                                                                                                                                                                                                                                       |
| Biological Process | GO:0035584 | calcium-mediated signaling using intracellular calcium source | 8/2279  | 22/18866  | 0.0029902 | 0.0984362 | 0.0890686 | 8  | AZU1/TRPM2/PTPRJ/DEFB1/CCL20/PTPRC/FIS1/STIMATE                                                                                                                                                                                                                                                                                                                                                      |
| Biological Process | GO:0030225 | macrophage differentiation                                    | 13/2279 | 47/18866  | 0.0029942 | 0.0984362 | 0.0890686 | 13 | CEBPE/MIR145/PRKCA/CSF1R/RIPK1/APP/TGFB1/RB1/TSPAN2/TRIB1/INHBA/LIF/FADD                                                                                                                                                                                                                                                                                                                             |
| Biological Process | GO:0043300 | regulation of leukocyte degranulation                         | 13/2279 | 47/18866  | 0.0029942 | 0.0984362 | 0.0890686 | 13 | ABR/CD177/CCR2/GAB2/FGR/CD84/HLA-F/SPHK2/FER/BLK/BCR/ITGB2/PRAM1                                                                                                                                                                                                                                                                                                                                     |



|                    |            |                                                          |         |           |           |           |           |    |                                                                                                                                                                                                                                                                                                                  |
|--------------------|------------|----------------------------------------------------------|---------|-----------|-----------|-----------|-----------|----|------------------------------------------------------------------------------------------------------------------------------------------------------------------------------------------------------------------------------------------------------------------------------------------------------------------|
| Biological Process | GO:0046638 | positive regulation of alpha-beta T cell differentiation | 13/2279 | 47/18866  | 0.0029942 | 0.0984362 | 0.0890686 | 13 | PRKCZ/MYB/RUNX1/NLRP3/ITPKB/ZBTB16/TGFBR2/ZBTB7B/RARA/PNP/HLX/RUNX3/AP3D1                                                                                                                                                                                                                                        |
| Biological Process | GO:0072659 | protein localization to plasma membrane                  | 50/2279 | 281/18866 | 0.0031329 | 0.1026399 | 0.0928722 | 50 | PRKCZ/EHD1/BSG/ITGB1BP1/PIK3R1/MAP7/RHOG/TSPAN14/KIF13A/RAB31/TNF/PACS2/TTC7A/JUP/TEC/TNIK/ZDHHC2/TNFRSF1A/MRAP/AKAP5/SLC9A3R2/ZDHHC7/PPFIA1/TGFB1/PRKCH/RAB40C/RAPGEF2/TTC7B/SMURF1/VAMP5/MYO5A/EPB41L3/NUMB/CSK/PALM/GORASP2/PRKCI/RILPL1/CDH1/PRAM1/PRKCE/TMED2/BCL2L1/ANK2/EZR/PDZK1/FLOT1/MYADM/SPTBN4/FYB1 |
| Biological Process | GO:0002819 | regulation of adaptive immune response                   | 33/2279 | 168/18866 | 0.0031665 | 0.1033847 | 0.0935462 | 33 | IL27/PRKCZ/TRIM27/FUT7/IL10/SLC11A1/TNFRSF1B/NLRP3/IL1R1/CCR2/TNF/TRAF2/TNFAIP3/LOXL3/TNFSF13B/DUSP22/CD226/HLA-F/PTPN6/SMAD7/ZBTB7B/TGFB1/RIPK3/PTPRC/TP53BP1/MEF2C/IL18R1/HLX/TNFSF13/FADD/PAXIP1/CYRIB/NSD2                                                                                                   |
| Biological Process | GO:0001894 | tissue homeostasis                                       | 47/2279 | 261/18866 | 0.0032223 | 0.1048451 | 0.0948676 | 47 | PIWIL4/DEF8/MFSD2A/TJP2/LPCAT1/INPP5D/ANGPT1/CRB1/CCR2/ANKRD11/PRKCA/UBASH3B/TNFAIP3/CDH23/CSF1R/SFTPD/TLR9/CTSH/MBP/CCDC66/MTF1/CDH3/NF1/LRRK1/JAM3/WWTR1/ITGB3/ACTG1/TMEM64/CSK/SLC22A5/PLEKHM1/ESRRB/ADD1/NOD2/RB1/BCL2/NOTCH1/ACACA/GCNT2/CDHR1/EPAS1/F2R/LTF/PDGFRB/SLC2A1/NPHP4                            |
| Biological Process | GO:0046637 | regulation of alpha-beta T cell differentiation          | 16/2279 | 64/18866  | 0.003261  | 0.1057424 | 0.0956795 | 16 | IL27/PRKCZ/MYB/RUNX1/NLRP3/ITPKB/LOXL3/ZBTB16/TGFBR2/SMAD7/ZBTB7B/RARA/PNP/HLX/RUNX3/AP3D1                                                                                                                                                                                                                       |
| Biological Process | GO:0016571 | histone methylation                                      | 29/2279 | 143/18866 | 0.0033763 | 0.108982  | 0.0986108 | 29 | GFI1/BRD4/MYB/PRMT2/ASH2L/SETD2/SMYD3/EHMT2/WDR82/PAX7/KMT2D/KDM4C/SETD1B/SETD1A/CREBBP/TET2/ZNF335/PRDM16/PHF19/DNMT1/PIH1D1/DYDC2/DYDC1/NTMT1/FBL/MECOM/PAXIP1/NSD3/NSD2                                                                                                                                       |
| Biological Process | GO:0070528 | protein kinase C signaling                               | 10/2279 | 32/18866  | 0.0033838 | 0.108982  | 0.0986108 | 10 | AZU1/PRKCZ/WNT11/SPHK2/DGKQ/PDGFB/DGKD/ANKRD1/FLOT1/MYADM                                                                                                                                                                                                                                                        |
| Biological Process | GO:0006661 | phosphatidylinositol biosynthetic process                | 25/2279 | 118/18866 | 0.0034209 | 0.1094339 | 0.0990197 | 25 | SYNJ2/PIK3CD/VAC14/PIP5K1B/INPP5D/PIK3R1/PIGL/PIK3R6/PIGU/FPR2/PIGN/PITPNM2/INPP4A/PIK3R5/PIP4K2A/PITPNM1/SH3YL1/PLEKHA2/PDGFB/INPP5E/PI4K2A/PI4KA/PIGQ/RUFY1/INPP5F                                                                                                                                             |
| Biological Process | GO:0051209 | release of sequestered calcium ion into cytosol          | 25/2279 | 118/18866 | 0.0034209 | 0.1094339 | 0.0990197 | 25 | TRPM2/PDE4D/CASQ2/ITPR2/LCK/CACNA1C/SLC8A1/UBASH3B/ITPR1/JSRP1/PTPN6/RASA3/P2RY6/MYO5A/HTT/PTPRC/NOL3/TPCN2/GSTO1/PRKCE/F2R/ANK2/CHERP/PLCG1/CASQ1                                                                                                                                                               |

|                    |            |                                                                  |         |           |           |           |           |    |                                                                                                                                                                                                                                                   |
|--------------------|------------|------------------------------------------------------------------|---------|-----------|-----------|-----------|-----------|----|---------------------------------------------------------------------------------------------------------------------------------------------------------------------------------------------------------------------------------------------------|
| Biological Process | GO:1902904 | negative regulation of supramolecular fiber organization         | 31/2279 | 156/18866 | 0.0034563 | 0.1101958 | 0.0997091 | 31 | VILL/TBCD/TACSTD2/SSH1/GSN/KANK1/CAPG/ARAP1/NAV3/SSH3/CLU/PPFIA1/TMOD3/SVIL/PFN1/GMFB/SPTA1/MIR138-2/ADD1/ARHGEF18/AVIL/FLII/ARHGEF2/SPTAN1/TMOD1/GMFG/MYADM/SPTBN4/SPEF1/PRKN/CYRIB                                                              |
| Biological Process | GO:0052126 | movement in host environment                                     | 33/2279 | 169/18866 | 0.0034891 | 0.1103755 | 0.0998716 | 33 | TRIM27/P4HB/TRIM38/GSN/TRIM8/WWP2/SLC10A1/CD55/TRIM10/SLC1A5/CLEC5A/SNX3/UVRAG/ITGB5/PC/PHB/FCN1/TRIM5/VPS18/ITGB3/CTSB/TPCN2/NPC1/CDH1/SLC52A2/EP515/TYRO3/ITGB6/SIVA1/TRIM26/GRK2/NECTIN1/NECTIN4                                               |
| Biological Process | GO:0070374 | positive regulation of ERK1 and ERK2 cascade                     | 40/2279 | 215/18866 | 0.0034895 | 0.1103755 | 0.0998716 | 40 | PRKCZ/CHI3L1/ANGPT1/RAP1B/ARRB1/PRKCA/TNF/CCL5/CSF1R/FPR2/C5AR2/GNAI2/APP/MIR24-2/MIR27A/MIR23A/MTURN/SCIMP/P2RY6/TGFB1/PHB/MARCO/RAPGEF2/PDGFD/BMPER/CCL20/PTPRC/PDGF/ARRB2/NTRK1/NOD2/NOTCH1/GCNT2/F2R/PDGFC/PDGFRB/ARHGAP8/NODAL/CCL22/DENND2B |
| Biological Process | GO:0010927 | cellular component assembly involved in morphogenesis            | 24/2279 | 112/18866 | 0.0034968 | 0.1103755 | 0.0998716 | 24 | CD9/ACRBP/TTN/CASQ2/MYH11/AKAP13/TNNT3/PMP22/SYNPO2L/ILK/TMOD3/EPB41L3/ACTG1/WDR1/MEF2C/FLII/CNTNAP1/PDGFRB/ANK2/ANKRD1/TMOD1/CASQ1/ERCC2/MFS D14A                                                                                                |
| Biological Process | GO:0007221 | positive regulation of transcription of Notch receptor target    | 7/2279  | 18/18866  | 0.0035236 | 0.1104876 | 0.0999731 | 7  | MAML3/MAML1/MAML2/RBPJ/CREBBP/NOTCH1/NOTCH4                                                                                                                                                                                                       |
| Biological Process | GO:0046597 | negative regulation of viral entry into host cell                | 7/2279  | 18/18866  | 0.0035236 | 0.1104876 | 0.0999731 | 7  | GSN/TRIM8/TRIM10/SNX3/FCN1/TRIM5/TRIM26                                                                                                                                                                                                           |
| Biological Process | GO:2000379 | positive regulation of reactive oxygen species metabolic process | 23/2279 | 106/18866 | 0.0035592 | 0.1112355 | 0.1006498 | 23 | HDAC4/CD177/SMAD3/DNM2/TNF/FPR2/TGFBR2/THBS1/RAB27A/RIPK1/GNAI2/NOS1AP/MIR24-2/CLU/TGFB1/HBB/RIPK3/PDGFB/NFE2L2/ITGB2/AGTR1/PDGFRB/SIRT3                                                                                                          |
| Biological Process | GO:0007034 | vacuolar transport                                               | 30/2279 | 150/18866 | 0.0036035 | 0.1118844 | 0.101237  | 30 | SORL1/MGRN1/VTI1A/ANKFY1/VPS53/LYST/TGFBRAP1/VPS13D/KIF13A/SNX27/DENND3/BIN1/CLU/SMURF1/VPS18/CLEC16A/ATG14/HOOK2/NUMA1/GRN/SORT1/NPC1/ARSB/AP1G2/NEDD4/AP3D1/NCOA4/MVB12A/VPS51/PRKN                                                             |
| Biological Process | GO:0097530 | granulocyte migration                                            | 30/2279 | 150/18866 | 0.0036035 | 0.1118844 | 0.101237  | 30 | PRTN3/PDE4D/S100A8/FUT7/C3AR1/PIK3CD/RHOH/CSF3R/CD177/IL1R1/RHOG/CCL5/CSF1R/THBS1/C5AR2/PREX1/HRH1/JAM3/CAMK1D/CXCL17/CCL20/CXCR1/WDR1/ITGB2/DAPK2/DNM1L/DYSF/CCL22/VAV3/JAML                                                                     |

|                    |            |                                                                      |         |           |           |          |           |    |                                                                                                                                                                                                                                                                                                                                                                                                                                                                  |
|--------------------|------------|----------------------------------------------------------------------|---------|-----------|-----------|----------|-----------|----|------------------------------------------------------------------------------------------------------------------------------------------------------------------------------------------------------------------------------------------------------------------------------------------------------------------------------------------------------------------------------------------------------------------------------------------------------------------|
| Biological Process | GO:1901342 | regulation of vasculature development                                | 73/2279 | 444/18866 | 0.0037106 | 0.114835 | 0.1039068 | 73 | LRG1/RNH1/IL10/PPARG/C3AR1/MIR140/MAP3K3/MIR143/MIR145/RIN2/CHI3L1/HDAC7/RUNX1/ITGB1BP1/CCR2/PIK3R6/PRKCA/COL4A2/MIR199A1/TNF/TNFAIP3/NFATC2/MIR101-2/AGO1/HIPK2/SEMA4A/NFATC1/JUP/TGFBR2/THBS1/CTSH/DLL1/AKT3/MIR24-2/MIR27A/MIR23A/FLT1/JAK1/AGO2/RAPGEF2/EPN2/PRKCB/AQP1/NF1/PDGFD/BMPER/HK2/GHRL/IL6R/GRN/PDGFB/ETS1/NFE2L2/ENG/ITGB2/VASH1/MIR138-2/PKM/MIR199A2/NOTCH1/DNMT1/SP100/GPR4/AGTR1/PPP1R16B/HHEX/TNFSF12/PDE3B/PLCG1/NODAL/CX3CR1/CEMIP2/ADGRA2 |
| Biological Process | GO:0060326 | cell chemotaxis                                                      | 54/2279 | 311/18866 | 0.0037609 | 0.115691 | 0.1046813 | 54 | AZU1/TRPM2/PDE4D/S100A8/CALR/IL10/C3AR1/IL16/PIK3CD/ABCC1/CSF3R/LYST/CCR2/RHOG/CCL5/CSF1R/SFTPD/FPR2/PADI2/ACKR2/THBS1/C5AR2/PREX1/DEFB124/FLT1/PLEKHG5/CCR9/FGFR1/ZNF580/HRH1/PDGFD/JAM3/CAMK1D/CXCL17/CCL20/CXCR1/IL6R/C10orf99/PDGFB/CNR2/ARRB2/ITGB2/DAPK2/NOTCH1/DNM1L/AGTR1/PDGFRB/ANO6/DYSF/CCL27/CCL22/CX3CR1/VAV3/JAML                                                                                                                                  |
| Biological Process | GO:0010944 | negative regulation of transcription by competitive promoter binding | 5/2279  | 10/18866  | 0.0038166 | 0.115691 | 0.1046813 | 5  | CREB1/KDM2A/SMAD7/PHB/HHEX                                                                                                                                                                                                                                                                                                                                                                                                                                       |
| Biological Process | GO:0015893 | drug transport                                                       | 5/2279  | 10/18866  | 0.0038166 | 0.115691 | 0.1046813 | 5  | TMEM30A/ABCC2/ATP8B1/SLC19A1/ABCC3                                                                                                                                                                                                                                                                                                                                                                                                                               |
| Biological Process | GO:0034350 | regulation of glial cell apoptotic process                           | 5/2279  | 10/18866  | 0.0038166 | 0.115691 | 0.1046813 | 5  | PRKCA/TRAF2/DLL1/PRKCH/PRKCI                                                                                                                                                                                                                                                                                                                                                                                                                                     |
| Biological Process | GO:0030177 | positive regulation of Wnt signaling pathway                         | 35/2279 | 183/18866 | 0.0038182 | 0.115691 | 0.1046813 | 35 | RNF220/KANK1/CSNK1D/TNKS/MIR145/SKI/SMAD3/ZEB2/TNFAIP3/FAM53B/JUP/DISC1/RBPJ/ILK/CDH3/TGFB1/AXIN1/LRRK1/CSNK1E/PSMF1/ARNTL/PSMB7/TTC21B/ZBED3/HHEX/ANKRD6/RUVBL1/ZBED2/PPM1N/GID8/DAPK3/PSMD13/ADGRA2/ATP6VOC/CCN4                                                                                                                                                                                                                                               |
| Biological Process | GO:0060070 | canonical Wnt signaling pathway                                      | 58/2279 | 339/18866 | 0.0038321 | 0.115691 | 0.1046813 | 58 | RNF220/KANK1/CSNK1D/TNKS/CCDC88C/MIR145/SMAD3/AMFR/FAM53B/UBAC2/JUP/CUL3/DISC1/RBPJ/TCF7L2/CDK14/ILK/LIMD1/HDAC1/LATS2/WNT11/CDH3/TGFB1/KREMEN1/AXIN1/TLE1/LRRK1/WWTR1/RARG/TMEM64/WNT5B/STK3/CSNK1E/PSMF1/KREMEN2/ARNTL/FRAT2/PSMB7/TTC21B/NOTCH1/ZBED3/FOXO1/CHD8/CYLD/ANKRD6/RUVBL1/ZBED2/PPM1N/PTPRU/CCNY/GID8/DAPK3/PSMD13/NPHP4/TMEM131L/ADGRA2/PRKN/PLPP3                                                                                                 |
| Biological Process | GO:0051098 | regulation of binding                                                | 62/2279 | 367/18866 | 0.0038512 | 0.115691 | 0.1046813 | 62 | HDAC4/SLPI/CTS2/ZFPM1/MARK3/SORL1/IL10/PPARG/TNKS/ANGPT1/SKI/HMBOX1/ITGB1BP1/SMAD3/AMFR/ARRB1/ARHGEF7/UBASH3B/HIPK2/CCM2L/DISC1/APP/MIR27A/TCF7L2/TAF10/CPNE1/PAX7/TGFB1/RAPGEF2/RARA/CSF3/CTBP2/STK3/ATP2A3/CSNK1E/PDGFB/RSF1/SPTA1/ZNF462/ARRB2/PLCL1/PER2/ADD1/RB1/MED25/CDCAS/SP100/CYLD/MARK2/BCL3/CLN5/FLOT1/DTNBP1/ERCC2/PARP9/LIF/EIF4G1/TFIP11/STING1/PRKN/ILRUN/FBH1                                                                                   |
| Biological Process | GO:0006638 | neutral lipid metabolic process                                      | 28/2279 | 138/18866 | 0.0038971 | 0.115691 | 0.1046813 | 28 | PNPLA2/PLA2G15/SORL1/MGLL/ACSL1/MFSD2A/LIPC/ABHD16A/GPLD1/PGS1/DGKQ/NR1H2/ATG14/GNB3/ABHD16B/DGKA/DGKD/FABP6/CAT/AVIL/LMF1/ABHD5/PCK2/SREBF1/CPT1A/LPIN1/LYPLA2/AGPAT5                                                                                                                                                                                                                                                                                           |

|                    |            |                                                                     |         |           |           |           |           |    |                                                                                                                                                                              |
|--------------------|------------|---------------------------------------------------------------------|---------|-----------|-----------|-----------|-----------|----|------------------------------------------------------------------------------------------------------------------------------------------------------------------------------|
| Biological Process | GO:0006639 | acylglycerol metabolic process                                      | 28/2279 | 138/18866 | 0.0038971 | 0.115691  | 0.1046813 | 28 | PNPLA2/PLA2G15/SORL1/MGLL/ACSL1/MFSD2A/LIPC/ABHD16A/GPLD1/PGS1/DGKQ/NR1H2/ATG14/GNB3/ABHD16B/DGKA/DGKD/FABP6/CAT/AVIL/LMF1/ABHD5/PCK2/SREBF1/CPT1A/LPIN1/LYPLA2/AGPAT5       |
| Biological Process | GO:0031958 | corticosteroid receptor signaling pathway                           | 6/2279  | 14/18866  | 0.0039087 | 0.115691  | 0.1046813 | 6  | CALR/YWHAH/PHB/ARNTL/PER1/NEDD4                                                                                                                                              |
| Biological Process | GO:0045217 | cell-cell junction maintenance                                      | 6/2279  | 14/18866  | 0.0039087 | 0.115691  | 0.1046813 | 6  | PRTN3/CD177/CSF1R/PLEKHA7/F2R/KIFC3                                                                                                                                          |
| Biological Process | GO:0072672 | neutrophil extravasation                                            | 6/2279  | 14/18866  | 0.0039087 | 0.115691  | 0.1046813 | 6  | PRTN3/FUT7/PIK3CD/CD177/IL1R1/JAML                                                                                                                                           |
| Biological Process | GO:1900044 | regulation of protein K63-linked ubiquitination                     | 6/2279  | 14/18866  | 0.0039087 | 0.115691  | 0.1046813 | 6  | OTUB2/MIR138-2/OTUB1/NOD2/TRIP12/PARP10                                                                                                                                      |
| Biological Process | GO:1901569 | fatty acid derivative catabolic process                             | 6/2279  | 14/18866  | 0.0039087 | 0.115691  | 0.1046813 | 6  | BDH1/ABHD16A/ACOT7/CYP4F3/ACAT1/LYPLA2                                                                                                                                       |
| Biological Process | GO:1903555 | regulation of tumor necrosis factor superfamily cytokine production | 24/2279 | 113/18866 | 0.0039426 | 0.1160967 | 0.1050484 | 24 | TRIM27/FOXP1/IL10/MIR140/ANGPT1/PIK3R1/TNFAIP3/TLR9/SPON2/RIPK1/C5AR2/PTPN6/CLU/PTPRJ/RARA/PTPRC/ARRB2/NOD2/ARHGEF2/LTF/CD33/FADD/V SIR/ILRUN                                |
| Biological Process | GO:0002369 | T cell cytokine production                                          | 12/2279 | 43/18866  | 0.0039469 | 0.1160967 | 0.1050484 | 12 | PRKCZ/CD55/SLC11A1/TNFRSF1B/NLRP3/IL1R1/CCR2/TRAF2/HLA-F/SMAD7/IL18RAP/IL18R1                                                                                                |
| Biological Process | GO:2001056 | positive regulation of cysteine-type endopeptidase activity         | 30/2279 | 151/18866 | 0.0039893 | 0.1169816 | 0.1058491 | 30 | NLRC4/S100A8/GRAMD4/AIM2/PPARG/GSN/LCK/NLRP3/SMAD3/ARRB1/MEFV/TNF/TRAF2/CYFIP2/TBC1D10A/CTSD/CTSH/RIPK1/CIDEB/PERP/BCL10/ATP2A3/FIS1/P2RX1/F2R/CASP1/BCL2L13/ASPH/NODAL/FADD |

|                    |            |                                                                        |         |           |           |           |           |    |                                                                                                                                                                                                                                                                                                                                                                                        |
|--------------------|------------|------------------------------------------------------------------------|---------|-----------|-----------|-----------|-----------|----|----------------------------------------------------------------------------------------------------------------------------------------------------------------------------------------------------------------------------------------------------------------------------------------------------------------------------------------------------------------------------------------|
| Biological Process | GO:0009416 | response to light stimulus                                             | 55/2279 | 319/18866 | 0.0040481 | 0.1174915 | 0.1063104 | 55 | ELANE/RCVRN/PDE6A/MFAP4/CREB1/PPP1R1B/BRCA2/CACNA2D4/CRB1/PIK3R1/BMF/ARRB1/DNM2/HUS1/TANC1/APP/PITPNM1/FECH/CCDC66/GNAT2/SYNGAP1/CDC25A/HRH1/AQP1/MTA1/NF1/SLC1A2/GNA11/MEIS2/CREBBP/CAT/PPP1CB/COPS3/PER2/SLC1A3/BCL2/PER1/FBXL6/GRK7/RHNO1/NEDD4/ERCC1/CRIP1/USP2/HMGCS1/RELA/BCL3/EYS/POLD3/XPA/CABP4/ERCC2/SYNPO/NPHP4/PRKAA1                                                      |
| Biological Process | GO:0048588 | developmental cell growth                                              | 43/2279 | 237/18866 | 0.0040752 | 0.1174915 | 0.1063104 | 43 | SEMA6B/PRKCZ/CPNE6/NRP2/CTDP1/ULK1/AKAP13/PRMT2/CTTN/DNM2/MIR199A1/CPNE5/ZEB2/CYFIP2/BCL11A/SEMA4A/RTN4/TGFBR2/DISC1/SEMA4B/APP/MIR24-2/MIR23A/IFRD1/ILK/SMAD7/CPNE1/SEMA4D/SMURF1/KMT2D/RARG/CDH4/MIR199A2/CDKL3/SYT17/SLIT3/CYFIP1/TRPV2/NDEL1/SLIT1/DBNL/SPART/PRKN                                                                                                                 |
| Biological Process | GO:0000209 | protein polyubiquitination                                             | 58/2279 | 340/18866 | 0.0040898 | 0.1174915 | 0.1063104 | 58 | TRIM27/RNF144A/FZR1/MGRN1/RNF19A/TRIM38/WWP2/TNKS/LNPEP/AMFR/TRAF2/TNFAIP3/TRAF1/FBXO7/RUSC1/CUL3/DCAF15/UBE2O/OTUB2/CDC16/FBXW2/UBE2J2/FBXO40/SMURF1/LMO7/TRIM5/UBE2V1/UBE2Q2/FBXL19/PSMF1/RNF213/FBXL13/MIR138-2/FBXL18/RNF144B/OTUB1/NOD2/BCL2/PSMB7/TRAF3IP2/UBE3A/NEDD4/ANAPC7/TRIP12/RNF14/DYSF/HECW2/FBXW11/RNF40/PARP10/HERC5/UBE2D2/PELI1/PSMD13/MARCHF6/MARCHF8/PRKN/MARCHF7 |
| Biological Process | GO:0010506 | regulation of autophagy                                                | 59/2279 | 347/18866 | 0.0040968 | 0.1174915 | 0.1063104 | 59 | FOXK1/TRIM27/RPTOR/PRKAG2/IL10/TRIM38/TRIM8/SPTLC2/ULK1/ERN1/VPS13D/BMF/CTTN/MIR199A1/MEFV/RHEB/FBXO7/LARP1/ITPR1/CAMKK2/USP36/PIP4K2A/VPS26B/ATP6V1B2/FEZ2/PRKAB1/UVRAG/TMEM150B/SMURF1/RUFY4/TRIM5/CLEC16A/HTT/HK2/SH3BP4/GFAP/TPCN2/TBC1D14/NPC1/DAPK2/BCL2/MIR199A2/DNM1L/ATP6V0B/NEDD4/TSC2/FOXO1/SOGA1/SREBF1/XPA/EIF4G1/DAPK3/SVIP/NPRL2/PRKAA1/STING1/PRKN/ATP6V0C/ATP6V1C1    |
| Biological Process | GO:0051222 | positive regulation of protein transport                               | 60/2279 | 354/18866 | 0.0041005 | 0.1174915 | 0.1063104 | 60 | PRKCZ/SORL1/NADK/IL10/TFDP1/TTN/C1QTNF3/PRR5L/TM9SF4/MYRIP/CLEC9A/TMEM30A/YWHAH/ITGB1BP1/PIK3R1/SMAD3/FRMD4A/ARRB1/GPLD1/FGR/TNF/MYO18A/ABCG1/CLEC5A/JUP/EDEM1/USP36/ZDHHC2/TCF7L2/ABLIM3/AKAP5/UBE2J2/TGFB1/GIPR/BLK/NR1H2/GHRL/EDEM2/ITGB2/MYOM1/YWHAZ/CDH1/FIS1/BCL2/DNM1L/PRKCE/TP53BP2/MYO1C/MIEF1/ANKRD1/CADM1/YWHAQ/CD33/RPH3AL/EZR/PDZK1/C2CD2L/SIRT3/PRKAA1/RIPOR1            |
| Biological Process | GO:0018027 | peptidyl-lysine dimethylation                                          | 8/2279  | 23/18866  | 0.0041056 | 0.1174915 | 0.1063104 | 8  | SETD2/EHMT2/KMT2D/SETD1B/SETD1A/PIH1D1/EEF1AKMT2/CSKMT                                                                                                                                                                                                                                                                                                                                 |
| Biological Process | GO:0050860 | negative regulation of T cell receptor signaling pathway               | 8/2279  | 23/18866  | 0.0041056 | 0.1174915 | 0.1063104 | 8  | DUSP22/PTPN6/PTPRJ/LILRB4/DUSP3/ELF1/EZR/SLA2                                                                                                                                                                                                                                                                                                                                          |
| Biological Process | GO:1904996 | positive regulation of leukocyte adhesion to vascular endothelial cell | 8/2279  | 23/18866  | 0.0041056 | 0.1174915 | 0.1063104 | 8  | ELANE/FUT4/FUT7/CCR2/TNF/ETS1/ITGB2/RELA                                                                                                                                                                                                                                                                                                                                               |
| Biological Process | GO:0002718 | regulation of cytokine production involved in immune response          | 19/2279 | 83/18866  | 0.0041481 | 0.1180299 | 0.1067977 | 19 | PRKCZ/IL10/TNFRSF1B/NLRP3/IL1R1/CCR2/TNF/TRAF2/SPON2/CD226/HLA-F/SMAD7/SCIMP/TGFB1/SLC7A5/BCL10/NOD2/IL18R1/CD96                                                                                                                                                                                                                                                                       |

|                    |            |                                                               |         |           |           |           |           |    |                                                                                                                                                                                                                                                                                                                                                                                                       |
|--------------------|------------|---------------------------------------------------------------|---------|-----------|-----------|-----------|-----------|----|-------------------------------------------------------------------------------------------------------------------------------------------------------------------------------------------------------------------------------------------------------------------------------------------------------------------------------------------------------------------------------------------------------|
| Biological Process | GO:0001892 | embryonic placenta development                                | 20/2279 | 89/18866  | 0.0041603 | 0.1180299 | 0.1067977 | 20 | IL10/SETD2/SPINT2/E2F7/RBPJ/SP3/DNAJB6/STK3/GRHL2/NCOA1/PDGFB/VASH1/EPAS1/GGNBP2/TMED2/CEBPB/PCDH12/PLCD3/NODAL/LIF                                                                                                                                                                                                                                                                                   |
| Biological Process | GO:0006479 | protein methylation                                           | 35/2279 | 184/18866 | 0.0041804 | 0.1180299 | 0.1067977 | 35 | GFI1/BRD4/METTL21A/MYB/PRMT2/ASH2L/SNRPD3/SETD2/SMYD3/EHMT2/WDR82/PAX7/KMT2D/KDM4C/SETD1B/SETD1A/CREBBP/TET2/ZNF335/METTL22/PRDM16/PHF19/DNMT1/PIH1D1/DYDC2/DYDC1/NTMT1/FBL/MECOM/PAXIP1/EEF1AKMT3/EEF1AKMT2/NSD3/NSD2/CSKMT                                                                                                                                                                          |
| Biological Process | GO:0008213 | protein alkylation                                            | 35/2279 | 184/18866 | 0.0041804 | 0.1180299 | 0.1067977 | 35 | GFI1/BRD4/METTL21A/MYB/PRMT2/ASH2L/SNRPD3/SETD2/SMYD3/EHMT2/WDR82/PAX7/KMT2D/KDM4C/SETD1B/SETD1A/CREBBP/TET2/ZNF335/METTL22/PRDM16/PHF19/DNMT1/PIH1D1/DYDC2/DYDC1/NTMT1/FBL/MECOM/PAXIP1/EEF1AKMT3/EEF1AKMT2/NSD3/NSD2/CSKMT                                                                                                                                                                          |
| Biological Process | GO:0007223 | Wnt signaling pathway, calcium modulating pathway             | 11/2279 | 38/18866  | 0.0041865 | 0.1180299 | 0.1067977 | 11 | PDE6A/TNRC6B/AGO1/NFATC1/TCF7L2/GNAT2/WNT11/AGO2/PLCB1/GNG2/GNAO1                                                                                                                                                                                                                                                                                                                                     |
| Biological Process | GO:0042093 | T-helper cell differentiation                                 | 15/2279 | 60/18866  | 0.004319  | 0.1198569 | 0.1084508 | 15 | IL27/PRKCZ/ZFPM1/FOXP1/MYB/NLRP3/LOXL3/SEMA4A/SMAD7/LY9/ZBTB7B/RARA/IL18R1/HLX/BCL3                                                                                                                                                                                                                                                                                                                   |
| Biological Process | GO:0042692 | muscle cell differentiation                                   | 65/2279 | 390/18866 | 0.0043296 | 0.1198569 | 0.1084508 | 65 | HDAC4/EHD1/RXRA/CALR/CD9/CTDP1/MYO18B/TTN/CASQ2/MIR140/MIR145/MYH11/SYNE1/AKAP13/SKI/MAML1/SLC8A1/MIR199A1/TANC1/NFATC2/TNNT3/NFATC1/BIN1/SMYD3/MYH9/EPC1/SYNPO2L/DLL1/RBPJ/MIR24-2/MIR23A/IFRD1/TGFB1/FBXO40/TMOD3/RARA/ACTG1/PDGFB/WDR1/ENG/ARRB2/SORT1/ANKRD2/RB1/BCL2/TCF3/MIR199A2/NOTCH1/DNMT1/MEF2C/FHL2/FLII/PLD3/PDGFRB/DYSF/ANK2/ANKRD1/TMOD1/FLOT1/SCGB3A1/CASQ1/SYPL2/CEACAM5/MYORG/MRTFA |
| Biological Process | GO:0010821 | regulation of mitochondrion organization                      | 36/2279 | 191/18866 | 0.0043351 | 0.1198569 | 0.1084508 | 36 | VAT1/TFDP1/YWHAH/INF2/VPS13D/PAM16/BMF/CTTN/FBXO7/CAMKK2/USP36/CLU/ABLIM3/UBE2J2/CIDEB/SMURF1/CLEC16A/HTT/HK2/NOL3/ARRB2/FNIP2/YWHAZ/FIS1/BCL2/DNMT1/TP53BP2/MIEF1/TSC2/BCL2L1/SREBF1/YWHAQ/DHODH/PRKAA1/PRKN/CYRIB                                                                                                                                                                                   |
| Biological Process | GO:0043552 | positive regulation of phosphatidylinositol 3-kinase activity | 10/2279 | 33/18866  | 0.0043378 | 0.1198569 | 0.1084508 | 10 | FGR/FPR2/FLT1/TGFB1/VAV2/ATG14/PDGFB/NOD2/PDGFRB/VAV3                                                                                                                                                                                                                                                                                                                                                 |
| Biological Process | GO:0045920 | negative regulation of exocytosis                             | 10/2279 | 33/18866  | 0.0043378 | 0.1198569 | 0.1084508 | 10 | ABR/RAP1B/CCR2/CD84/GNAI2/HLA-F/BCR/NOTCH1/CBARP/PRKN                                                                                                                                                                                                                                                                                                                                                 |

|                    |            |                                                   |         |           |           |           |           |    |                                                                                                                                                                                                                                                                                                                          |
|--------------------|------------|---------------------------------------------------|---------|-----------|-----------|-----------|-----------|----|--------------------------------------------------------------------------------------------------------------------------------------------------------------------------------------------------------------------------------------------------------------------------------------------------------------------------|
| Biological Process | GO:0022011 | myelination in peripheral nervous system          | 9/2279  | 28/18866  | 0.0043396 | 0.1198569 | 0.1084508 | 9  | ARHGEF10/SH3TC2/SKI/LGI4/NDRG1/ILK/NF1/FA2H/CNTNAP1                                                                                                                                                                                                                                                                      |
| Biological Process | GO:0032292 | peripheral nervous system axon ensheathment       | 9/2279  | 28/18866  | 0.0043396 | 0.1198569 | 0.1084508 | 9  | ARHGEF10/SH3TC2/SKI/LGI4/NDRG1/ILK/NF1/FA2H/CNTNAP1                                                                                                                                                                                                                                                                      |
| Biological Process | GO:0016482 | cytosolic transport                               | 32/2279 | 165/18866 | 0.0044289 | 0.1219674 | 0.1103604 | 32 | TRIM27/LMTK2/DCTN1/SORL1/AP2A1/STX5/VTI1A/ANKFY1/VPS53/HEATR5A/TRAPPC10/TBC1D10A/ERC1/SNX3/VPS26B/CORO7/UBE2O/HOOK2/NUMA1/TBC1D14/SORT1/KIF1B/SGSM2/EPS15/WDR81/CLN5/EZR/VPS51/CLTCL1/PHETA1/PRKN/DOP1B                                                                                                                  |
| Biological Process | GO:0007249 | I-kappaB kinase/NF-kappaB signaling               | 50/2279 | 286/18866 | 0.0044923 | 0.1230021 | 0.1112967 | 50 | TRIM39/TRIM27/BRD4/TRIM38/TRIM8/MAP3K3/RHOH/AKAP13/ANGPT1/TNF/TRAF2/TNFAIP3/CXXC5/TRAF1/TLR9/ERC1/RIPK1/TNFRSF1A/HDAC1/CPNE1/DEFB124/PLEKHG5/SPHK2/LITAF/PRKCB/TLE1/RIPK3/TRIM5/UBE2V1/TNIP1/BCL10/ZDHHC17/MAP3K14/NEK6/IRAK2/NOD2/PER1/PRKCE/TRAF3IP2/F2R/LTF/CASP1/RELA/BCL3/PPM1N/CX3CR1/FADD/PEL1/EEF1D/PRKN         |
| Biological Process | GO:0043542 | endothelial cell migration                        | 50/2279 | 286/18866 | 0.0044923 | 0.1230021 | 0.1112967 | 50 | S100P/FOXP1/CALR/NRP2/PPARG/MAP3K3/MIR143/RIN2/HDAC7/ANGPT1/ITGB1BP1/PRKCA/MIR199A1/GLPD1/TNF/MIR101-2/SEMA4A/STAT5A/JUP/THBS1/MYH9/AKT3/MIR24-2/MIR27A/MIR23A/MIA3/PXN/PLEKHG5/FGFR1/TGFB1/ZNF580/NF1/BMPER/ITGB3/GRN/PDGFB/ETS1/NFE2L2/ITGB2/VASH1/MIR199A2/NOTCH1/MEF2C/SP100/TNFSF12/PLCG1/ADTRP/PAXIP1/ADGRA2/PLPP3 |
| Biological Process | GO:0048207 | vesicle targeting, rough ER to cis-Golgi          | 16/2279 | 66/18866  | 0.0045242 | 0.1231645 | 0.1114436 | 16 | CTSZ/SERPINA1/TGFA/STX5/CSNK1D/TRAPPC10/CUL3/TRAPPC9/CNIH2/CD59/SEC13/ANKRD28/SEC24C/TMED2/SEC31A/TRAPPC2                                                                                                                                                                                                                |
| Biological Process | GO:0048208 | COPII vesicle coating                             | 16/2279 | 66/18866  | 0.0045242 | 0.1231645 | 0.1114436 | 16 | CTSZ/SERPINA1/TGFA/STX5/CSNK1D/TRAPPC10/CUL3/TRAPPC9/CNIH2/CD59/SEC13/ANKRD28/SEC24C/TMED2/SEC31A/TRAPPC2                                                                                                                                                                                                                |
| Biological Process | GO:0043122 | regulation of I-kappaB kinase/NF-kappaB signaling | 45/2279 | 252/18866 | 0.0045578 | 0.1237237 | 0.1119496 | 45 | TRIM39/TRIM27/BRD4/TRIM38/TRIM8/MAP3K3/RHOH/AKAP13/ANGPT1/TNF/TRAF2/TNFAIP3/CXXC5/TRAF1/TLR9/RIPK1/TNFRSF1A/HDAC1/CPNE1/PLEKHG5/SPHK2/LITAF/PRKCB/TLE1/TRIM5/UBE2V1/TNIP1/BCL10/ZDHHC17/MAP3K14/NEK6/NOD2/PER1/PRKCE/TRAF3IP2/F2R/LTF/CASP1/RELA/PPM1N/CX3CR1/FADD/PEL1/EEF1D/PRKN                                       |
| Biological Process | GO:0046631 | alpha-beta T cell activation                      | 29/2279 | 146/18866 | 0.0046061 | 0.1246791 | 0.1128141 | 29 | IL27/PRKCZ/ZFPM1/FOXP1/FUT7/MYB/RUNX1/CD55/NLRP3/ITPKB/CCR2/LOXL3/SEMA4A/ZBTB16/TGFBR2/SMAD7/LY9/ZBTB7B/RARA/PTPRC/PNP/BCL2/IL18R1/HLX/RUNX3/DOCK2/AP3D1/BCL3/V SIR                                                                                                                                                      |

|                    |            |                                                              |         |           |           |           |           |    |                                                                                                                                                                                                                                                                                                                                                                                                                                            |
|--------------------|------------|--------------------------------------------------------------|---------|-----------|-----------|-----------|-----------|----|--------------------------------------------------------------------------------------------------------------------------------------------------------------------------------------------------------------------------------------------------------------------------------------------------------------------------------------------------------------------------------------------------------------------------------------------|
| Biological Process | GO:0045862 | positive regulation of proteolysis                           | 62/2279 | 370/18866 | 0.0046364 | 0.1247895 | 0.112914  | 62 | NLRC4/S100A8/RNF144A/ENO1/FZR1/GRAMD4/RNF19A/AIM2/PPARG/GSN/CSNK1D/LCK/TNFRSF1B/NLRP3/SMAD3/ARRB1/MEFV/GPLD1/TNF/TRAF2/CYFIP2/TBC1D10A/CBFA2T3/C<br>TSD/DISC1/EDEM1/MYH9/CTSH/RIPK1/APP/MBP/CLU/SMAD7/CIDEB/F12/SMURF1/AXIN1/PERP/TNIP1/EDEM2/BCL10/ATP2A3/CSNK1E/GRN/NFE2L2/RNF144B/FIS1/P2RX1/F2R/CAS<br>P1/BCL2L13/RNF14/TRIB1/ASPH/FBXW11/AURKAIP1/RNF40/NODAL/FADD/PRKN/ANGPTL8/VSIR                                                  |
| Biological Process | GO:1904951 | positive regulation of establishment of protein localization | 62/2279 | 370/18866 | 0.0046364 | 0.1247895 | 0.112914  | 62 | PRKCZ/SORL1/NADK/IL10/TFDP1/TTN/C1QTNF3/PRR5L/TM9SF4/MYRIP/CLEC9A/TMEM30A/YWHAH/ITGB1BP1/PIK3R1/SMAD3/FRMD4A/ARRB1/GPLD1/FGR/TNF/MYO18A/ABCG1/C<br>LEC5A/JUP/EDEM1/USP36/ZDHHC2/CEP135/TCF7L2/ABLIM3/AKAP5/UBE2J2/TGFB1/GIPR/BLK/NR1H2/GHRL/EDEM2/ITGB2/MYOM1/YWHAZ/CDH1/FIS1/BCL2/DNM1L/PRKCE/TP53B<br>P2/MYO1C/MIEF1/ANKRD1/CADM1/YWHAQ/CD33/RPH3AL/EZR/PDZK1/CCT6A/C2CD2L/SIRT3/PRKAA1/RIPOR1                                           |
| Biological Process | GO:0030595 | leukocyte chemotaxis                                         | 42/2279 | 232/18866 | 0.0046739 | 0.1254426 | 0.113505  | 42 | AZU1/TRPM2/PDE4D/S100A8/CALR/IL10/C3AR1/IL16/PIK3CD/CSF3R/LYST/CCR2/CCL5/CSF1R/SFTPD/FPR2/PADI2/THBS1/C5AR2/PREX1/DEFB124/FLT1/ZNF580/HRH1/JAM3/CAMK1<br>D/CXCL17/CCL20/CXCR1/IL6R/C10orf99/PDGFBR/CNR2/ITGB2/DAPK2/DNM1L/ANO6/DYSF/CCL27/CCL22/VAV3/JAML                                                                                                                                                                                  |
| Biological Process | GO:0034329 | cell junction assembly                                       | 71/2279 | 434/18866 | 0.0047117 | 0.1261005 | 0.1141002 | 71 | TBCD/SPOCK2/CD9/COL17A1/TLN2/HDAC7/RUNX1/ITGB1BP1/RAP1B/SMAD3/PRKCA/ARHGEF7/CTTN/COLQ/TNF/GJAS/EPHB3/DUSP22/WHAMM/SEMA4A/JUP/PKP1/THBS1/TNS1/A<br>CTN1/APP/ACTN4/ILK/SMAD7/WNT11/FARP1/PRKCH/PTPRJ/SEMA4D/RAPGEF2/EPB41L3/NRXN1/KIRREL3/JAM3/TESK2/GHRL/ACTG1/GRHL2/BCR/WDR1/NRXN2/PRKCI/NTRK1/CDH<br>1/MPP7/BCL2/DNM3/CORO1C/VMP1/MEF2C/DUSP3/SHANK2/SDK2/CNTNAP1/MYO1C/ANK2/LAMB3/CDH11/FLOT1/SLIT1/CUX2/EIF4G1/DAPK3/NPHP4/DBNL/NECTIN1 |
| Biological Process | GO:0044272 | sulfur compound biosynthetic process                         | 36/2279 | 192/18866 | 0.0047302 | 0.1261005 | 0.1141002 | 36 | CSGALNACT1/ACSL1/DSE/ANGPT1/CHSY1/GGT1/CBS/CHST11/CHST15/CNDP2/NDST1/CHST2/ACSS1/XYLTI1/SLC26A1/GSTM5/ACACB/MGST2/ST3GAL4/ACSS2/B4GALT3/NFE2L2/MTH<br>FD1/PAPSS2/GSTO1/ACACA/ACSF3/MAT1A/AD1/ACAT1/SCD/GSTO2/SLC25A1/ST3GAL2/B3GNT2/B4GAT1                                                                                                                                                                                                 |
| Biological Process | GO:0043367 | CD4-positive, alpha-beta T cell differentiation              | 18/2279 | 78/18866  | 0.0047382 | 0.1261005 | 0.1141002 | 18 | IL27/PRKCZ/ZFPM1/FOXP1/FUT7/MYB/RUNX1/NLRP3/LOXL3/SEMA4A/SMAD7/LY9/ZBTB7B/RARA/IL18R1/HLX/RUNX3/BCL3                                                                                                                                                                                                                                                                                                                                       |
| Biological Process | GO:0007266 | Rho protein signal transduction                              | 28/2279 | 140/18866 | 0.0048042 | 0.1275003 | 0.1153668 | 28 | ARHGEF10/KANK1/AKAP13/MYO9B/ARHGDI1/RHOG/ARRB1/CUL3/CDC42EP1/SYNPO2L/PLEKHG5/EPH3/EPH2/EPH4/ABCA1/BCR/ARHGEF25/ARHGEF18/GNA12/F2R/ARHGEF28/ARHGE<br>F2/GPR4/AGTR1/PDGFRB/ARHGAP1/FLOT1/PRAG1/RIPOR1                                                                                                                                                                                                                                        |
| Biological Process | GO:0002696 | positive regulation of leukocyte activation                  | 67/2279 | 406/18866 | 0.0048289 | 0.1277735 | 0.115614  | 67 | HLA-<br>DMB/PRKCZ/IL10/RHOH/LCK/MIR145/MYB/RUNX1/SIRPB1/CD55/INPP5D/CD177/NLRP3/PIK3R1/ITPKB/CCR2/PIK3R6/GAB2/FGR/CCL5/GRAP2/NCK2/NFATC2/TNFSF13B/TLR9/IGHV6<br>-1/ZBTB16/TGFB2/THBS1/CD226/HLA-<br>F/PTPN6/ZMIZ1/DOCK8/SPHK2/ZBTB7B/TGFB1/RARA/LILRB4/CCDC88B/PTPRC/CD320/CSK/BCL10/SPTA1/ZNF335/PNP/ITGB2/NOD2/BCL2/TP53BP1/MEF2C/SIRPG/HLX/RUNX3/TNFS<br>F13/CYLD/AP3D1/SLC7A1/FADD/PELI1/PCID2/PAXIP1/VAV3/CYRIB/VSIR/NSD2             |
| Biological Process | GO:0030835 | negative regulation of actin filament depolymerization       | 12/2279 | 44/18866  | 0.0048414 | 0.1277735 | 0.115614  | 12 | VILL/GSN/CAPG/TMOD3/SVIL/SPTA1/ADD1/AVIL/FLII/SPTAN1/TMOD1/SPTBN4                                                                                                                                                                                                                                                                                                                                                                          |



|                    |            |                                                |         |           |           |           |           |    |                                                                                                                                                                                                                                                                                                                                                                                                                                                                                             |
|--------------------|------------|------------------------------------------------|---------|-----------|-----------|-----------|-----------|----|---------------------------------------------------------------------------------------------------------------------------------------------------------------------------------------------------------------------------------------------------------------------------------------------------------------------------------------------------------------------------------------------------------------------------------------------------------------------------------------------|
| Biological Process | GO:0006874 | cellular calcium ion homeostasis               | 74/2279 | 456/18866 | 0.0048655 | 0.1280527 | 0.1158666 | 74 | ELANE/TRPM2/PDE4D/CALR/C3AR1/THADA/CASQ2/ITPR2/LCK/HEXB/CD55/CACNA1C/SLC24A4/VDR/CCR2/SMAD3/SLC8A1/MIR199A1/ANXA6/UBASH3B/CDH23/CCL5/PACS2/FPR2/FPR1/ATP2B2/ITPR1/ACKR2/DISC1/JSRP1/C5AR2/APP/PTPN6/RASA3/GNAT2/P2RY6/CCR9/PRKCB/TMEM178A/MYO5A/GIPR/HTT/GHRL/PTPRC/TMEM64/CXCR1/ATP2A3/NOL3/TPCN2/IMMT/FIS1/BCL2/MIR199A2/GSTO1/P2RX1/LPAR2/PRKCE/F2R/PDZD8/S1PR4/GPR4/AGTR1/ANK2/CHERP/PLCG1/ATP7B/P2RX5/TRPV2/CASQ1/GRINA/SYPL2/ANXA7/CX3CR1/SYNPO                                       |
| Biological Process | GO:0010632 | regulation of epithelial cell migration        | 52/2279 | 301/18866 | 0.0048804 | 0.1280908 | 0.1159011 | 52 | RREB1/TACSTD2/FOXP1/CALR/NRP2/PPARG/MAP3K3/MIR143/RIN2/HDAC7/ANGPT1/DOCK1/ITGB1BP1/PRKCA/MIR199A1/GPLD1/TNF/MIR101-2/SEMA4A/STAT5A/RTN4/JUP/TGFBR2/THBS1/CTSH/AKT3/MIR24-2/MIR27A/MIR23A/FGFR1/TGFB1/ZNF580/IQSEC1/NF1/PFN1/BMPER/ITGB3/GRN/PDGFB/ETS1/NFE2L2/VASH1/ARSB/MIR199A2/NOTCH1/CORO1C/MEF2C/PRKCE/SP100/PLCG1/ADGRA2/PLPP3                                                                                                                                                        |
| Biological Process | GO:0072503 | cellular divalent inorganic cation homeostasis | 79/2279 | 492/18866 | 0.0048979 | 0.1281962 | 0.1159965 | 79 | ELANE/TRPM2/PDE4D/S100A8/CALR/C3AR1/THADA/CASQ2/ITPR2/LCK/HEXB/CD55/CACNA1C/SLC11A1/SLC24A4/VDR/CCR2/SMAD3/SLC8A1/MIR199A1/ANXA6/UBASH3B/CDH23/CCL5/PACS2/FPR2/FPR1/ATP2B2/ITPR1/ACKR2/DISC1/JSRP1/C5AR2/APP/PTPN6/RASA3/GNAT2/P2RY6/CCR9/PRKCB/TMEM178A/MYO5A/GIPR/HTT/GHRL/PTPRC/TMEM64/CXCR1/ATP2A3/NOL3/TPCN2/IMMT/FIS1/BCL2/MIR199A2/GSTO1/SLC39A13/P2RX1/LPAR2/PRKCE/F2R/PDZD8/S1PR4/GPR4/AGTR1/ANK2/AP3D1/CHERP/PLCG1/ATP7B/P2RX5/TRPV2/CASQ1/GRINA/SYPL2/ANXA7/CX3CR1/SYNPO/SLC41A1 |
| Biological Process | GO:0032869 | cellular response to insulin stimulus          | 41/2279 | 226/18866 | 0.0049565 | 0.1292147 | 0.1169181 | 41 | PRKCZ/SORL1/FUT7/PPARG/KANK1/PTPRE/PIK3R1/GPLD1/RAB31/BAIAP2L1/BAIAP2/GRB10/GNAI2/ATP6V1B2/ZDHHC7/IGF1R/ZBTB7B/FER/PRKCB/MYO5A/PRKCI/INSRR/PKM/ATP6V0B/BCAR3/PCK2/MYO1C/TSC2/FOXO1/SOGA1/SREBF1/PDE3B/CYFIP1/RELA/WBTC1/NDEL1/LPIN1/PRKAA1/MARS1/ATP6V0C/ATP6V1C1                                                                                                                                                                                                                           |
| Biological Process | GO:0006023 | aminoglycan biosynthetic process               | 24/2279 | 115/18866 | 0.0049776 | 0.1292147 | 0.1169181 | 24 | CSGALNACT1/AP2A1/HS3ST3B1/DSE/ANGPT1/CHSY1/CHST11/CHST15/NDST1/CHST2/SDC2/XYL1/TGFB1/B4GALT7/PDGFB/ST3GAL4/B4GALT3/GCNT2/PDGFRB/HAS3/ST3GAL2/B3GNT2/B4GAT1/PXYLP1                                                                                                                                                                                                                                                                                                                           |
| Biological Process | GO:0031623 | receptor internalization                       | 24/2279 | 115/18866 | 0.0049776 | 0.1292147 | 0.1169181 | 24 | CD9/ANGPT1/ARRB1/DNM2/MIR199A1/RAB31/ANKRD13B/ANKRD13D/NUMB/ITGB3/ANKRD13A/CXCR1/GSG1L/ARRB2/ITGB2/DNM1/DNM3/MIR199A2/EPS15/NEDD4/MX1/EZR/FLOT1/GRK2                                                                                                                                                                                                                                                                                                                                        |
| Biological Process | GO:0003417 | growth plate cartilage development             | 7/2279  | 19/18866  | 0.005004  | 0.1295453 | 0.1172172 | 7  | ANXA6/TGFBR2/POC1A/RARA/POR/RARG/NPPC                                                                                                                                                                                                                                                                                                                                                                                                                                                       |
| Biological Process | GO:0050867 | positive regulation of cell activation         | 69/2279 | 421/18866 | 0.0050525 | 0.130444  | 0.1180304 | 69 | HLA-DMB/PRKCZ/IL10/RPS6KA1/RHOH/LCK/MIR145/MYB/RUNX1/SIRPB1/CD55/INPP5D/CD177/NLRP3/PIK3R1/ITPKB/CCR2/PIK3R6/GAB2/FGR/CCL5/GRAP2/NCK2/NFATC2/TNFSF13B/TLR9/IGHV6-1/ZBTB16/TGFBR2/THBS1/CD226/HLA-F/PTPN6/ZMIZ1/DOCK8/SPHK2/ZBTB7B/TGFB1/RARA/LILRB4/CCDC88B/PTPRC/CD320/CSK/BCL10/SPTA1/ZNF335/PNP/ITGB2/NOD2/BCL2/TP53BP1/MEF2C/SIRPG/HLX/RUNX3/PDGFRB/TNFSF13/CYLD/AP3D1/SLC7A1/FADD/PELI1/PCID2/PAXIP1/VAV3/CYRIB/VSIR/NSD2                                                              |
| Biological Process | GO:0007163 | establishment or maintenance of cell polarity  | 40/2279 | 220/18866 | 0.0052554 | 0.1353151 | 0.1224379 | 40 | PRKCZ/PARVB/DCTN1/GSN/KANK1/RHOH/NDE1/CRB1/RAP1B/MAP7/RHOG/FRMD4A/SPINT2/SNX27/MYO18A/MYH9/RHOF/ILK/WNT11/DOCK8/FRMD4B/RHOBTB2/AQP1/JAM3/HTT/NUMA1/WDR1/PRKCI/SDCCAG8/MPP7/PARVG/ARHGEF2/FSCN3/NEK3/CDC42BPB/DOCK2/MARK2/FBXW11/NDEL1/CYRIB                                                                                                                                                                                                                                                 |

|                    |            |                                                   |         |           |           |           |           |    |                                                                                                                                                                                         |
|--------------------|------------|---------------------------------------------------|---------|-----------|-----------|-----------|-----------|----|-----------------------------------------------------------------------------------------------------------------------------------------------------------------------------------------|
| Biological Process | GO:0046513 | ceramide biosynthetic process                     | 16/2279 | 67/18866  | 0.0052913 | 0.1358728 | 0.1229426 | 16 | SPTLC2/TNF/ORMDL3/CERS6/TNFRSF1A/SPHK2/SGMS1/ST8SIA6/SGMS2/B4GALT3/P2RX1/FA2H/CERS2/SIRT3/PRKAA1/TLCD3B                                                                                 |
| Biological Process | GO:0035710 | CD4-positive, alpha-beta T cell activation        | 21/2279 | 97/18866  | 0.0053429 | 0.1362154 | 0.1232526 | 21 | IL27/PRKCZ/ZFPM1/FOXP1/FUT7/MYB/RUNX1/CD55/NLRP3/LOXL3/SEMA4A/TGFBR2/SMAD7/LY9/ZBTB7B/RARA/IL18R1/HLX/RUNX3/BCL3/VSIR                                                                   |
| Biological Process | GO:0120162 | positive regulation of cold-induced thermogenesis | 21/2279 | 97/18866  | 0.0053429 | 0.1362154 | 0.1232526 | 21 | ZNF516/LCN2/ACSL1/CCR2/DYNC1H1/GRB10/PRKAB1/IGF1R/ZBTB7B/GHRL/PRDM16/PER2/EPAS1/PDGFC/CEBPB/GADD45G/SCD/TRPV2/LPIN1/GOS2/BCL2                                                           |
| Biological Process | GO:0032456 | endocytic recycling                               | 13/2279 | 50/18866  | 0.0053514 | 0.1362154 | 0.1232526 | 13 | EHD1/LMTK2/SORL1/VPS53/DENND1A/ACAP2/SNX3/MICALL1/EPS15/ARHGAP1/INPP5F/VPS51/VPS35L                                                                                                     |
| Biological Process | GO:0002706 | regulation of lymphocyte mediated immunity        | 30/2279 | 154/18866 | 0.005362  | 0.1362154 | 0.1232526 | 30 | PRKCZ/FUT7/IL10/TNFRSF1B/NLRP3/IL1R1/CCR2/PIK3R6/TNF/TRAF2/DUSP22/CD226/HLA-F/PTPN6/SMAD7/TGFB1/NCR1/RIPK3/PTPRC/ARRB2/IL18RAP/TP53BP1/IL18R1/TNFSF13/CADM1/CD96/FADD/PAXIP1/CYRIB/NSD2 |
| Biological Process | GO:0015914 | phospholipid transport                            | 20/2279 | 91/18866  | 0.0054183 | 0.1369558 | 0.1239225 | 20 | OSBPL5/ABCC1/MFSD2A/TMEM30A/ABCG1/ATP8A1/ANO7/PLTP/PITPNM2/ATP11A/ATP8B1/PITPNM1/PITPNA/PCTP/ABCA1/OSBPL10/ATP8B4/PITPNC1/ANO6/C2CD2L                                                   |
| Biological Process | GO:0030851 | granulocyte differentiation                       | 10/2279 | 34/18866  | 0.0054914 | 0.1369558 | 0.1239225 | 10 | CEBPE/ZFPM1/RUNX1/INPP5D/CBFA2T3/TESC/RARA/SP3/CSF3/TRIB1                                                                                                                               |
| Biological Process | GO:0043276 | anoikis                                           | 10/2279 | 34/18866  | 0.0054914 | 0.1369558 | 0.1239225 | 10 | TFDP1/CEACAM6/BMF/TLE1/DAPK2/BCL2/NOTCH1/CHEK2/TSC2/CEACAM5                                                                                                                             |
| Biological Process | GO:0030091 | protein repair                                    | 4/2279  | 7/18866   | 0.0054921 | 0.1369558 | 0.1239225 | 4  | MSRB1/MSRB2/MSRA/FN3K                                                                                                                                                                   |

|                    |            |                                                                  |         |           |           |           |           |    |                                                                                                                                                                                                                                    |
|--------------------|------------|------------------------------------------------------------------|---------|-----------|-----------|-----------|-----------|----|------------------------------------------------------------------------------------------------------------------------------------------------------------------------------------------------------------------------------------|
| Biological Process | GO:0030913 | paranodal junction assembly                                      | 4/2279  | 7/18866   | 0.0054921 | 0.1369558 | 0.1239225 | 4  | CD9/EPB41L3/CNTNAP1/ANK2                                                                                                                                                                                                           |
| Biological Process | GO:0050882 | voluntary musculoskeletal movement                               | 4/2279  | 7/18866   | 0.0054921 | 0.1369558 | 0.1239225 | 4  | VT11A/HIPK2/ITPR1/MAP1A                                                                                                                                                                                                            |
| Biological Process | GO:1904747 | positive regulation of apoptotic process involved in development | 4/2279  | 7/18866   | 0.0054921 | 0.1369558 | 0.1239225 | 4  | TNFRSF1B/VDR/TNFRSF1A/NOTCH1                                                                                                                                                                                                       |
| Biological Process | GO:0034968 | histone lysine methylation                                       | 24/2279 | 116/18866 | 0.0055744 | 0.1386451 | 0.125451  | 24 | GFI1/BRD4/MYB/ASH2L/SETD2/SMYD3/EHMT2/WDR82/KMT2D/KDM4C/SETD1B/SETD1A/TET2/ZNF335/PRDM16/PHF19/DNMT1/PIH1D1/DYDC2/DYDC1/MECOM/PAXIP1/NSD3/NSD2                                                                                     |
| Biological Process | GO:0008277 | regulation of G protein-coupled receptor signaling pathway       | 29/2279 | 148/18866 | 0.0056195 | 0.1389092 | 0.12569   | 29 | PDE6A/MGRN1/MGLL/ARRB1/PRKCA/DNM2/CCL5/GIT1/GNAI2/RGS6/MRAP/ZDHHC7/GRK6/RGS12/PHB/DGKQ/GRK5/GNG7/GIPR/PDE6H/PLCB1/ARRB2/DNM1/RGS3/GRK7/RGS10/RPH3AL/GRK2/ACP3                                                                      |
| Biological Process | GO:0015721 | bile acid and bile salt transport                                | 9/2279  | 29/18866  | 0.0056289 | 0.1389092 | 0.12569   | 9  | RXRA/SLC51A/SLC10A1/ABCC2/ATP8B1/NCOA1/ABCC3/NCOA2/AQP9                                                                                                                                                                            |
| Biological Process | GO:0070861 | regulation of protein exit from endoplasmic reticulum            | 9/2279  | 29/18866  | 0.0056289 | 0.1389092 | 0.12569   | 9  | SORL1/TM9SF4/TMEM30A/UBAC2/EDEM1/DERL2/EDEM2/NUMA1/SVIP                                                                                                                                                                            |
| Biological Process | GO:0002221 | pattern recognition receptor signaling pathway                   | 37/2279 | 201/18866 | 0.0057649 | 0.1418964 | 0.1283929 | 37 | S100A8/GFI1/GRAMD4/MIR140/MAP2K6/PIK3AP1/SMPDL3B/TNFAIP3/SFTPD/TLR9/RTN4/RIPK1/COLEC12/SCIMP/PHB/FCN1/UBE2V1/TREML4/SEC14L1/TNIP1/BCL10/CTSB/ARRB2/ITGB2/IRAK2/NOD2/PRKCE/WDFY1/LTF/MAPKAP3/CYLD/TYRO3/RELA/FLOT1/UBE2D2/FADD/PEL1 |
| Biological Process | GO:0010763 | positive regulation of fibroblast migration                      | 6/2279  | 15/18866  | 0.0058552 | 0.1430094 | 0.1293999 | 6  | MIR145/SLC8A1/ARHGFE7/THBS1/TGFB1/PRKCE                                                                                                                                                                                            |

|                    |            |                                                                             |         |           |           |           |           |    |                                                                                                                                                                                                                                                                                                                                                                                                                                                                                     |
|--------------------|------------|-----------------------------------------------------------------------------|---------|-----------|-----------|-----------|-----------|----|-------------------------------------------------------------------------------------------------------------------------------------------------------------------------------------------------------------------------------------------------------------------------------------------------------------------------------------------------------------------------------------------------------------------------------------------------------------------------------------|
| Biological Process | GO:0090148 | membrane fission                                                            | 6/2279  | 15/18866  | 0.0058552 | 0.1430094 | 0.1293999 | 6  | DNM2/DNM1/DNM3/CORO1C/DNM1L/MX1                                                                                                                                                                                                                                                                                                                                                                                                                                                     |
| Biological Process | GO:1905820 | positive regulation of chromosome separation                                | 6/2279  | 15/18866  | 0.0058552 | 0.1430094 | 0.1293999 | 6  | NSMCE2/CUL3/CDC16/NUMA1/RB1/ANAPC7                                                                                                                                                                                                                                                                                                                                                                                                                                                  |
| Biological Process | GO:0050773 | regulation of dendrite development                                          | 30/2279 | 155/18866 | 0.0058995 | 0.1431525 | 0.1295295 | 30 | MFSD2A/YWHAH/ZMYND8/BCL11A/ITSN1/TNIK/DISC1/CUX1/BAIAP2/ILK/PREX1/SDC2/ASAP1/SEMA4D/RAPGEF2/SS18L2/CPEB3/CAMK1D/SIPA1L1/DNM3/CDKL3/DNM1L/MEF2C/S<br>HANK2/UBE3A/NEDD4/HECW2/CYFIP1/CUX2/DBNL                                                                                                                                                                                                                                                                                        |
| Biological Process | GO:0048525 | negative regulation of viral process                                        | 22/2279 | 104/18866 | 0.0059063 | 0.1431525 | 0.1295295 | 22 | SLPI/TRIM27/GSN/TRIM8/TRIM10/SRPK2/TNF/CCL5/SNX3/HDAC1/FCN1/TRIM5/TNIP1/LTF/ILF3/MX1/PARP10/BANF1/ISG20/TRIM26/PRKN/SHFL                                                                                                                                                                                                                                                                                                                                                            |
| Biological Process | GO:0120034 | positive regulation of plasma membrane bounded cell projection assembly     | 22/2279 | 104/18866 | 0.0059063 | 0.1431525 | 0.1295295 | 22 | HDAC4/DEF8/ZMYND8/DNM2/ARAP1/CDC42EP1/CEP135/WASL/EPS8L3/EPS8L1/PFN1/ESPN/HTT/PALM/PLEKHM1/NCKAP1/RALA/DNM3/AVIL/CYFIP1/NDEL1/SEPTIN9                                                                                                                                                                                                                                                                                                                                               |
| Biological Process | GO:0002294 | CD4-positive, alpha-beta T cell differentiation involved in immune response | 15/2279 | 62/18866  | 0.0059938 | 0.1449032 | 0.1311136 | 15 | IL27/PRKCZ/ZFPM1/FOXP1/MYB/NLRP3/LOXL3/SEMA4A/SMAD7/LY9/ZBTB7B/RARA/IL18R1/HLX/BCL3                                                                                                                                                                                                                                                                                                                                                                                                 |
| Biological Process | GO:0007409 | axonogenesis                                                                | 77/2279 | 482/18866 | 0.0061551 | 0.1470026 | 0.1330131 | 77 | SEMA6B/PLXNC1/LMTK2/BSG/NRP2/TRIO/KIF13B/PIK3CD/RHOH/CREB1/ULK1/APBB2/PIK3R1/RHOG/GAB2/PRKCA/DRGX/CTTN/DNM2/ZEB2/CSF1R/DOK1/EPHB3/SEMA4A/RTN4/UN<br>C5B/DISC1/DOK2/BAIAP2/GRB10/SEMA4B/APP/IFRD1/FEZ2/ILK/PAX2/PITPNA/SYNGAP1/SEMA4D/ZSWIM5/NRXN1/NUMB/DSCAML1/BMPR1B/KIF5C/CDH4/SIPA1L1/SPTA1/KLF7/NT<br>RK1/BCL2/NOTCH1/MYOT/MAP1A/CDKL3/SLIT3/ATL1/SPTAN1/PLCG1/MARK2/CYFIP1/TRPV2/CDH11/NDEL1/NPTX1/EZR/FLOT1/SLIT1/SPTBN4/OTX2/LYPLA2/TSKU/DBNL/UNC5D/B3<br>GNT2/SPART/NECTIN1 |
| Biological Process | GO:0045582 | positive regulation of T cell differentiation                               | 20/2279 | 92/18866  | 0.0061557 | 0.1470026 | 0.1330131 | 20 | PRKCZ/RHOH/MYB/RUNX1/NLRP3/ITPKB/PIK3R6/ZBTB16/TGFBR2/ZMIZ1/ZBTB7B/RARA/LILRB4/PTPRC/PNP/HLX/RUNX3/CYLD/AP3D1/VSIR                                                                                                                                                                                                                                                                                                                                                                  |
| Biological Process | GO:1904888 | cranial skeletal system development                                         | 16/2279 | 68/18866  | 0.0061608 | 0.1470026 | 0.1330131 | 16 | FOXN3/SETD2/SMAD3/MTHFD1L/SH3PXD2B/CHST11/TGFBR2/NDST1/RDH10/GRHL2/RUNX2/IFT140/MTHFD1/ALX3/MEF2C/NODAL                                                                                                                                                                                                                                                                                                                                                                             |

|                    |            |                                                                         |         |          |           |           |           |    |                                                                            |
|--------------------|------------|-------------------------------------------------------------------------|---------|----------|-----------|-----------|-----------|----|----------------------------------------------------------------------------|
| Biological Process | GO:0070142 | synaptic vesicle budding                                                | 5/2279  | 11/18866 | 0.0063057 | 0.1470026 | 0.1330131 | 5  | DNM2/DNM1/DNM3/AP3D1/MX1                                                   |
| Biological Process | GO:1903265 | positive regulation of tumor necrosis factor-mediated signaling pathway | 5/2279  | 11/18866 | 0.0063057 | 0.1470026 | 0.1330131 | 5  | TRAF2/RIPK1/CPNE1/CASP1/PRKN                                               |
| Biological Process | GO:0071675 | regulation of mononuclear cell migration                                | 13/2279 | 51/18866 | 0.0064045 | 0.1470026 | 0.1330131 | 13 | C3AR1/CCR2/TNF/CCL5/CSF1R/FPR2/THBS1/DEFB124/PDGFD/CXCL17/PLCB1/ANO6/CCL27 |
| Biological Process | GO:0000416 | positive regulation of histone H3-K36 methylation                       | 3/2279  | 4/18866  | 0.0064055 | 0.1470026 | 0.1330131 | 3  | BRD4/PAXIP1/NSD3                                                           |
| Biological Process | GO:0002374 | cytokine secretion involved in immune response                          | 3/2279  | 4/18866  | 0.0064055 | 0.1470026 | 0.1330131 | 3  | NLRP3/SPHK2/NOD2                                                           |
| Biological Process | GO:0008594 | photoreceptor cell morphogenesis                                        | 3/2279  | 4/18866  | 0.0064055 | 0.1470026 | 0.1330131 | 3  | MFSD2A/CDHR1/CABP4                                                         |
| Biological Process | GO:0015722 | canalicular bile acid transport                                         | 3/2279  | 4/18866  | 0.0064055 | 0.1470026 | 0.1330131 | 3  | ABCC2/ABCC3/AQP9                                                           |
| Biological Process | GO:0019541 | propionate metabolic process                                            | 3/2279  | 4/18866  | 0.0064055 | 0.1470026 | 0.1330131 | 3  | ACSS1/ACSS2/PCK2                                                           |
| Biological Process | GO:0032474 | otolith morphogenesis                                                   | 3/2279  | 4/18866  | 0.0064055 | 0.1470026 | 0.1330131 | 3  | SLC44A4/LRIG1/TTC39C                                                       |

|                    |            |                                                              |        |         |           |           |           |   |                     |
|--------------------|------------|--------------------------------------------------------------|--------|---------|-----------|-----------|-----------|---|---------------------|
| Biological Process | GO:0033183 | negative regulation of histone ubiquitination                | 3/2279 | 4/18866 | 0.0064055 | 0.1470026 | 0.1330131 | 3 | OTUB2/OTUB1/TRIP12  |
| Biological Process | GO:0051138 | positive regulation of NK T cell differentiation             | 3/2279 | 4/18866 | 0.0064055 | 0.1470026 | 0.1330131 | 3 | ZBTB16/TGFBR2/AP3D1 |
| Biological Process | GO:0072429 | response to intra-S DNA damage checkpoint signaling          | 3/2279 | 4/18866 | 0.0064055 | 0.1470026 | 0.1330131 | 3 | EME1/SLX4/FBH1      |
| Biological Process | GO:0072757 | cellular response to camptothecin                            | 3/2279 | 4/18866 | 0.0064055 | 0.1470026 | 0.1330131 | 3 | BLM/SPIDR/RECQL5    |
| Biological Process | GO:1901314 | regulation of histone H2A K63-linked ubiquitination          | 3/2279 | 4/18866 | 0.0064055 | 0.1470026 | 0.1330131 | 3 | OTUB2/OTUB1/TRIP12  |
| Biological Process | GO:1901315 | negative regulation of histone H2A K63-linked ubiquitination | 3/2279 | 4/18866 | 0.0064055 | 0.1470026 | 0.1330131 | 3 | OTUB2/OTUB1/TRIP12  |
| Biological Process | GO:1904016 | response to Thyroglobulin triiodothyronine                   | 3/2279 | 4/18866 | 0.0064055 | 0.1470026 | 0.1330131 | 3 | NCOA1/SLC2A1/NCOA2  |
| Biological Process | GO:2000437 | regulation of monocyte extravasation                         | 3/2279 | 4/18866 | 0.0064055 | 0.1470026 | 0.1330131 | 3 | CCR2/PDGFD/PLCB1    |
| Biological Process | GO:2000491 | positive regulation of hepatic stellate cell activation      | 3/2279 | 4/18866 | 0.0064055 | 0.1470026 | 0.1330131 | 3 | RPS6KA1/MYB/PDGFRB  |

|                    |            |                                                            |         |           |           |           |           |    |                                                                                                                                                                                                                                                                                                                                                                                                                                                      |
|--------------------|------------|------------------------------------------------------------|---------|-----------|-----------|-----------|-----------|----|------------------------------------------------------------------------------------------------------------------------------------------------------------------------------------------------------------------------------------------------------------------------------------------------------------------------------------------------------------------------------------------------------------------------------------------------------|
| Biological Process | GO:0098732 | macromolecule deacylation                                  | 23/2279 | 111/18866 | 0.0064415 | 0.1474724 | 0.1334382 | 23 | HDAC4/SPRED2/HDAC7/SIN3B/SKI/ABHD16A/C6orf89/HDAC1/SPHK2/ZBTB7B/PHB/MTA1/CTBP1/ABHD16B/MTA2/PER2/PER1/NEK3/SREBF1/LYPLA2/ELK4/SIRT3/PRKAA1                                                                                                                                                                                                                                                                                                           |
| Biological Process | GO:0008286 | insulin receptor signaling pathway                         | 28/2279 | 143/18866 | 0.006492  | 0.147915  | 0.1338387 | 28 | PRKCZ/SORL1/FUT7/KANK1/PTPRE/PIK3R1/GPLD1/BAIAP2L1/BAIAP2/GRB10/GNAI2/ATP6V1B2/IGF1R/ZBTB7B/FER/PRKCB/INSRR/ATP6V0B/BCAR3/TSC2/FOXO1/SOGA1/SREBF1/RELA/NDEL1/PRKAA1/ATP6V0C/ATP6V1C1                                                                                                                                                                                                                                                                 |
| Biological Process | GO:0045598 | regulation of fat cell differentiation                     | 28/2279 | 143/18866 | 0.006492  | 0.147915  | 0.1338387 | 28 | ZFPM1/RREB1/TRIO/PPARG/CREB1/SMAD3/TNF/SH3PXD2B/ZBTB16/ZNF385A/ZBTB7B/TGFB1/TGFB11/WWTR1/TMEM64/WNT5B/STK3/GNB3/FTO/AAMDC/SORT1/ARNTL/PRDM16/CEBPB/FOXO1/ZADH2/TLCD3B/CCN4                                                                                                                                                                                                                                                                           |
| Biological Process | GO:0010876 | lipid localization                                         | 71/2279 | 440/18866 | 0.0065442 | 0.1487466 | 0.1345912 | 71 | PNPLA2/EHD1/PRKAG2/OSBPL5/RXRA/PPARG/SLC51A/TMEM159/ACSL1/ABCC1/SLC10A1/MFSD2A/HEXB/MYB/MAP2K6/TMEM30A/LIPC/TNF/ABCG1/ATP8A1/ABCC2/HDLBP/ANO7/PLTP/THBS1/PITPNM2/STARD6/ATP11A/ATP8B1/PITPNM1/MIR27A/OSBPL6/CLU/PITPNA/SLCO3A1/NR1H2/LRP10/ITGB3/GHRL/PCTP/ABCA1/NCOA1/ACACB/FABP6/FTO/OSBPL10/TXN2/ABCC3/ATP8B4/NPC1/SGPP1/SPNS3/ACACA/PDZD8/PITPNC1/ABHD5/AGTR1/SLC2A1/ANO6/DYSF/NCOA2/GRAMD1A/ESYT1/CPT1A/INHBA/VPS51/CDS2/C2CD2L/AQP9/BSCL2/PKRN |
| Biological Process | GO:0031334 | positive regulation of protein-containing complex assembly | 45/2279 | 257/18866 | 0.0065671 | 0.1489119 | 0.1347407 | 45 | TRIM27/DCTN1/SPIDR/GSN/CREB1/RAP1B/BMF/CTTN/TNF/NCK2/WHAMM/BAIAP2L1/NAV3/CDC42EP1/BIN1/BAIAP2/CLU/ASAP1/WASL/TGFB1/FER/PFN1/NR1H2/CSF3/GMFB/ABCA1/NUMA1/ZDHHC1/FNIP2/NCKAP1/MPP7/PIH1D1/MED25/TPPP3/PRKCE/MYO1C/ERCC1/CYFIP1/GMFG/BAIAP2L2/XPA/ERCC2/EIF4G1/STMP1/SLF1                                                                                                                                                                               |
| Biological Process | GO:0045621 | positive regulation of lymphocyte differentiation          | 22/2279 | 105/18866 | 0.0066401 | 0.1495093 | 0.1352813 | 22 | PRKCZ/RHOH/MYB/RUNX1/INPP5D/NLRP3/ITPKB/PIK3R6/ZBTB16/TGFB2/ZMIZ1/ZBTB7B/RARA/LILRB4/PTPRC/PNP/HLX/RUNX3/CYLD/AP3D1/PCID2/VSIR                                                                                                                                                                                                                                                                                                                       |
| Biological Process | GO:1902106 | negative regulation of leukocyte differentiation           | 22/2279 | 105/18866 | 0.0066401 | 0.1495093 | 0.1352813 | 22 | ZFPM1/RUNX1/INPP5D/PIK3R1/UBASH3B/LOXL3/FBXO7/SMAD7/ZBTB7B/RARA/TMEM178A/LILRB4/NF1/ZC3H8/PGLYRP1/LRRC17/LTF/HLX/RUNX3/TRIB1/INHBA/TMEM131L                                                                                                                                                                                                                                                                                                          |
| Biological Process | GO:0002699 | positive regulation of immune effector process             | 40/2279 | 223/18866 | 0.0066407 | 0.1495093 | 0.1352813 | 40 | HLA-DMB/PRKCZ/MYB/CD177/NLRP3/IL1R1/CCR2/GAB2/FGR/TNF/TRAF2/MYO18A/CD84/TLR9/SPON2/CD226/HLA-F/SCIMP/SPHK2/TGFB1/PHB/FER/PTPRJ/RARA/BLK/SLC7A5/PTPRC/BCL10/ITGB2/IL18RAP/NOD2/TP53BP1/IL18R1/HLX/TNFSF13/CADM1/FADD/PAXIP1/CYRIB/NSD2                                                                                                                                                                                                                |
| Biological Process | GO:0002698 | negative regulation of immune effector process             | 25/2279 | 124/18866 | 0.0066828 | 0.1501012 | 0.1358169 | 25 | ABR/IL10/TRIM38/CD55/CCR2/TNF/LOXL3/CD84/DUSP22/HLA-F/PTPN6/SMAD7/ZBTB7B/TGFB1/FER/CD59/PGLYRP1/SEC14L1/PTPRC/GRN/BCR/ARRB2/HLX/CD96/ILRUN                                                                                                                                                                                                                                                                                                           |

|                    |            |                                                                               |         |           |           |           |           |    |                                                                                                                                                                                                                                                                                                                                   |
|--------------------|------------|-------------------------------------------------------------------------------|---------|-----------|-----------|-----------|-----------|----|-----------------------------------------------------------------------------------------------------------------------------------------------------------------------------------------------------------------------------------------------------------------------------------------------------------------------------------|
| Biological Process | GO:0021915 | neural tube development                                                       | 31/2279 | 163/18866 | 0.0067494 | 0.150177  | 0.1358855 | 31 | SHROOM3/SKI/SETD2/SPINT2/MTHFD1L/SUFU/ZEB2/MIB1/PAX2/PAX7/TGFB1/RARA/NF1/PFN1/RARG/STK3/GRHL2/BCL10/IFT140/MTHFD1/RALA/NOTCH1/TMED2/TSC2/TEAD2/SSB<br>P3/ALDH1A2/LMO4/NODAL/HES3/BRD2                                                                                                                                             |
| Biological Process | GO:0051494 | negative regulation of cytoskeleton organization                              | 31/2279 | 163/18866 | 0.0067494 | 0.150177  | 0.1358855 | 31 | VILL/TBCD/TACSTD2/SSH1/GSN/KANK1/CAPG/ARAP1/NAV3/SSH3/PPF1A1/TMOD3/SVIL/PFN1/ESPN/GMFB/SPTA1/MIR138-<br>2/ADD1/ARHGEF18/AVIL/FLII/ARHGEF2/SPTAN1/TMOD1/GMFG/MYADM/SPTBN4/SPEF1/PRKN/CYRIB                                                                                                                                         |
| Biological Process | GO:0048016 | inositol phosphate-mediated signaling                                         | 14/2279 | 57/18866  | 0.0067694 | 0.150177  | 0.1358855 | 14 | ITPR2/INPP5A/TNF/NFATC2/ITPR1/NFATC1/CAMTA1/RCAN1/HRH1/DYRK2/PDGFB/FHL2/CHERP/STIMATE                                                                                                                                                                                                                                             |
| Biological Process | GO:0051568 | histone H3-K4 methylation                                                     | 14/2279 | 57/18866  | 0.0067694 | 0.150177  | 0.1358855 | 14 | GFI1/MYB/ASH2L/WDR82/KMT2D/SETD1B/SETD1A/TET2/ZNF335/DNMT1/PIH1D1/DYDC2/DYDC1/PAXIP1                                                                                                                                                                                                                                              |
| Biological Process | GO:0070372 | regulation of ERK1 and ERK2 cascade                                           | 52/2279 | 306/18866 | 0.0067909 | 0.150177  | 0.1358855 | 52 | PRKCZ/SPRED2/MIR145/CHI3L1/ANGPT1/ITGB1BP1/RAP1B/ARRB1/PRKCA/TNF/CCL5/CSF1R/FPR2/CSAR2/GNAI2/APP/PTPN6/MIR24-<br>2/MIR27A/MIR23A/MTURN/SCIMP/P2RY6/TGFB1/PHB/MARCO/RAPGEF2/PDGFD/BMPER/CCL20/TNIP1/PTPRC/CSK/PDGFB/ARRB2/YWHAZ/NTRK1/NOD2/NOTCH1/GCNT2/DUSP3/F<br>2R/PDGFC/PDGFRB/ARHGAP8/EZR/NODAL/CCL22/LIF/NDRG2/SIRT3/DENND2B |
| Biological Process | GO:0042552 | myelination                                                                   | 27/2279 | 137/18866 | 0.0067977 | 0.150177  | 0.1358855 | 27 | ARHGEF10/SH3TC2/CD9/HEXB/SKI/LGI4/TNFRSF1B/NDRG1/GALC/EIF2B5/TG/PMP22/MBP/ILK/CLU/TNFRSF21/RARA/MYO5A/NF1/EPB41L3/JAM3/RARG/TSPAN2/FA2H/CNTNAP1/AN<br>K2/ERCC2                                                                                                                                                                    |
| Biological Process | GO:0045580 | regulation of T cell differentiation                                          | 29/2279 | 150/18866 | 0.0068126 | 0.150177  | 0.1358855 | 29 | IL27/PRKCZ/RHOH/MYB/RUNX1/NLRP3/ITPKB/CCR2/PIK3R6/LOXL3/NFATC2/ZBTB16/TGFBR2/SMAD7/ZMIZ1/ZBTB7B/FANCA/RARA/LILRB4/ZC3H8/PTPRC/CLPTM1/PNP/HLX/RUNX3/<br>CYLD/AP3D1/TMEM131L/VSIR                                                                                                                                                   |
| Biological Process | GO:1905039 | carboxylic acid transmembrane transport                                       | 29/2279 | 150/18866 | 0.0068126 | 0.150177  | 0.1358855 | 29 | SLC38A4/PRKAG2/SLC38A10/SLC16A3/SLC1A5/SLC15A4/THBS1/LRRC8C/SLC43A2/SLC19A1/SLC1A2/SLC7A7/SLC7A5/ACACB/SLC1A6/PER2/SLC16A1/SLC36A3/SLC1A3/ACACA/SLC43A<br>1/SLC2A1/SLC7A8/SLC13A5/CPT1A/SLC7A1/SLC25A1/SLC23A1/AQP9                                                                                                               |
| Biological Process | GO:0000083 | regulation of transcription involved in G1/S transition of mitotic cell cycle | 10/2279 | 35/18866  | 0.0068714 | 0.1504263 | 0.1361111 | 10 | GFI1/BRD4/TFDP1/E2F7/CDK14/ESRRB/CCNA1/RB1/E2F6/BACH1                                                                                                                                                                                                                                                                             |



|                    |            |                                                                                 |         |           |           |           |           |    |                                                                                                                                                                                                                            |
|--------------------|------------|---------------------------------------------------------------------------------|---------|-----------|-----------|-----------|-----------|----|----------------------------------------------------------------------------------------------------------------------------------------------------------------------------------------------------------------------------|
| Biological Process | GO:0033144 | negative regulation of intracellular steroid hormone receptor signaling pathway | 10/2279 | 35/18866  | 0.0068714 | 0.1504263 | 0.1361111 | 10 | FOXP1/CALR/NCOR2/LBH/ZNF366/HDAC1/PHB/ARNTL/PER1/NODAL                                                                                                                                                                     |
| Biological Process | GO:0098751 | bone cell development                                                           | 10/2279 | 35/18866  | 0.0068714 | 0.1504263 | 0.1361111 | 10 | ZFPM1/FOXP1/FLI1/PIP4K2A/PTPN6/ZNF385A/LRRK1/MEIS1/LTF/FAM20C                                                                                                                                                              |
| Biological Process | GO:0032088 | negative regulation of NF-kappaB transcription factor activity                  | 20/2279 | 93/18866  | 0.0069732 | 0.1522848 | 0.1377927 | 20 | GFI1/IL10/AIM2/PRMT2/NLRP3/ARRB1/TNFAIP3/TLR9/TRAIP/MIR27A/MTURN/NLRC5/CAT/ARRB2/MIR138-2/IRAK2/CYLD/PARP10/PELI1/COMMD6                                                                                                   |
| Biological Process | GO:0002287 | alpha-beta T cell activation involved in immune response                        | 15/2279 | 63/18866  | 0.0070081 | 0.1522848 | 0.1377927 | 15 | IL27/PRKCZ/ZFPM1/FOXP1/MYB/NLRP3/LOXL3/SEMA4A/SMAD7/LY9/ZBTB7B/RARA/IL18R1/HLX/BCL3                                                                                                                                        |
| Biological Process | GO:0002293 | alpha-beta T cell differentiation involved in immune response                   | 15/2279 | 63/18866  | 0.0070081 | 0.1522848 | 0.1377927 | 15 | IL27/PRKCZ/ZFPM1/FOXP1/MYB/NLRP3/LOXL3/SEMA4A/SMAD7/LY9/ZBTB7B/RARA/IL18R1/HLX/BCL3                                                                                                                                        |
| Biological Process | GO:0030308 | negative regulation of cell growth                                              | 35/2279 | 190/18866 | 0.0070204 | 0.1522848 | 0.1377927 | 35 | SEMA6B/CDA/ENO1/PPARG/CTDP1/SERTAD2/APBB2/SMAD3/MIR199A1/BCL11A/VGLL4/SEMA4A/RTN4/MEG3/SEMA4B/SMARCA2/IFRD1/WNT11/SPHK2/TGFB1/PHB/PTPRJ/SEMA4D/RERG/CDHR2/SH3BP4/PPP2R1A/RB1/BCL2/MIR199A2/CDKL3/SLIT3/SCGB3A1/INHBA/SPART |
| Biological Process | GO:0097581 | lamellipodium organization                                                      | 19/2279 | 87/18866  | 0.007093  | 0.1532176 | 0.1386367 | 19 | HDAC4/RREB1/PARVB/KANK1/ARHGEF7/CTTN/DNM2/NCK2/WHAMM/SPATA13/ABLIM3/FER/VAV2/NCKAP1/CORO1C/AVIL/CYFIP1/ABLIM1/VAV3                                                                                                         |
| Biological Process | GO:0010508 | positive regulation of autophagy                                                | 26/2279 | 131/18866 | 0.0071075 | 0.1532176 | 0.1386367 | 26 | TRIM27/TRIM38/TRIM8/SPTLC2/ULK1/VPS13D/MEFV/FBXO7/LARP1/CAMKK2/PIP4K2A/UVRAG/SMURF1/RUFY4/TRIM5/CLEC16A/HTT/HK2/SH3BP4/TSC2/FOXO1/SVIP/NPRL2/PRKAA1/STING1/PRKN                                                            |
| Biological Process | GO:0061028 | establishment of endothelial barrier                                            | 12/2279 | 46/18866  | 0.0071118 | 0.1532176 | 0.1386367 | 12 | PDE4D/TJP2/RAP1B/TNF/TNFRSF1A/RAPGEF2/ENG/ADD1/S1PR2/PPP1R16B/EZR/MYADM                                                                                                                                                    |

|                    |            |                                                                    |         |           |           |           |           |    |                                                                                                                                                                                                                         |
|--------------------|------------|--------------------------------------------------------------------|---------|-----------|-----------|-----------|-----------|----|-------------------------------------------------------------------------------------------------------------------------------------------------------------------------------------------------------------------------|
| Biological Process | GO:0043242 | negative regulation of protein-containing complex disassembly      | 18/2279 | 81/18866  | 0.0071692 | 0.1541055 | 0.1394401 | 18 | VILL/GSN/TNF/CAPG/NAV3/TMOD3/SVIL/CLEC16A/SPTA1/ADD1/AVIL/SCAF8/FLII/ARHGEF2/SPTAN1/TMOD1/SPTBN4/SPEF1                                                                                                                  |
| Biological Process | GO:0010800 | positive regulation of peptidyl-threonine phosphorylation          | 9/2279  | 30/18866  | 0.0071947 | 0.1543054 | 0.139621  | 9  | AZU1/RPTOR/PRKAG2/CHI3L1/APP/TGFB1/AXIN1/CAB39/S1PR2                                                                                                                                                                    |
| Biological Process | GO:0032528 | microvillus organization                                           | 8/2279  | 25/18866  | 0.0072664 | 0.1551418 | 0.1403778 | 8  | PLD1/TNIK/ATP8B1/RAPGEF2/CDHR2/ESPN/EZR/GLDN                                                                                                                                                                            |
| Biological Process | GO:0050857 | positive regulation of antigen receptor-mediated signaling pathway | 8/2279  | 25/18866  | 0.0072664 | 0.1551418 | 0.1403778 | 8  | FOXP1/LCK/CD226/PRKCH/PRKCB/PTPRC/CYLD/RELA                                                                                                                                                                             |
| Biological Process | GO:0046328 | regulation of JNK cascade                                          | 34/2279 | 184/18866 | 0.0074331 | 0.1583442 | 0.1432755 | 34 | HIPK3/ERN1/ZNF622/TNF/ZEB2/TRAF2/TRAF1/PHLPP1/HIPK2/TLR9/DUSP22/TNIK/RIPK1/APP/IGF1R/MTURN/AXIN1/COP55/SH3RF3/STK3/PLCB1/MAPK8IP2/TAOK3/NOD2/PER1/DUSP3/GADD45G/CYLD/ANKRD6/DTNBP1/MECOM/DBNL/PRKN/MAP3K20              |
| Biological Process | GO:0008643 | carbohydrate transport                                             | 29/2279 | 151/18866 | 0.0074837 | 0.158711  | 0.1436074 | 29 | PRKAG2/SLC2A5/MFSD2A/SLC45A4/MIR143/PIK3R1/SLC2A14/TNF/GRB10/SLC2A9/ZDHHC7/HNF1A/PRKCB/AQP1/SLC1A2/HK2/PRKCI/SLC37A1/NFE2L2/SORT1/AQP3/SLC5A10/SLC2A1/RTN2/EZR/ASPSCR1/CLTCL1/SLC23A1/AQP9                              |
| Biological Process | GO:1903825 | organic acid transmembrane transport                               | 29/2279 | 151/18866 | 0.0074837 | 0.158711  | 0.1436074 | 29 | SLC38A4/PRKAG2/SLC38A10/SLC16A3/SLC1A5/SLC15A4/THBS1/LRRC8C/SLC43A2/SLC19A1/SLC1A2/SLC7A7/SLC7A5/ACACB/SLC1A6/PER2/SLC16A1/SLC36A3/SLC1A3/ACACA/SLC43A1/SLC2A1/SLC7A8/SLC13A5/CPT1A/SLC7A1/SLC25A1/SLC23A1/AQP9         |
| Biological Process | GO:0032330 | regulation of chondrocyte differentiation                          | 13/2279 | 52/18866  | 0.0076157 | 0.160944  | 0.1456278 | 13 | SMAD3/ZBTB16/SMAD7/POR/RARG/BMPR1B/RUNX2/TRPS1/GDF6/RELA/ZNF219/RFLNA/CCN4                                                                                                                                              |
| Biological Process | GO:0022408 | negative regulation of cell-cell adhesion                          | 35/2279 | 191/18866 | 0.0076229 | 0.160944  | 0.1456278 | 35 | IL10/CD9/MAD1L1/RUNX1/SPINT2/LAX1/UBASH3B/LOXL3/SFTPD/DUSP22/CCM2L/MBP/PTPN6/MIR27A/SMAD7/TNFRSF21/MIA3/ZBTB7B/TGFB1/IL1RN/TIGIT/ZC3H8/CDH1/NOTCH1/DUSP3/NOTCH4/HLX/CEBPB/RUNX3/ADTRP/MYADM/PELI1/TMEM131L/VSIR/MARCHF7 |

|                    |            |                                                          |         |           |           |           |           |    |                                                                                                                                                                                                                                                                                                                                                                                                    |
|--------------------|------------|----------------------------------------------------------|---------|-----------|-----------|-----------|-----------|----|----------------------------------------------------------------------------------------------------------------------------------------------------------------------------------------------------------------------------------------------------------------------------------------------------------------------------------------------------------------------------------------------------|
| Biological Process | GO:0021700 | developmental maturation                                 | 49/2279 | 287/18866 | 0.0076943 | 0.1620915 | 0.1466662 | 49 | MAEA/PPARG/BRCA2/LGI4/SLFN14/LYL1/BCL11A/RFX3/DISC1/BRD1/ZDHHC2/APP/RBPJ/PAX2/CDH3/FGFR1/XYL1/SEMA4D/DEFB1/MYO5A/NF1/PFN1/NRXN1/RUNX2/PPP2R1A/PALM/FEV/YWHAZ/RB1/POU2F2/BCL2/DMC1/EPAS1/NPPC/LTF/ANO6/ARHGFE15/FAM20C/EPB42/AP3D1/CLN5/ALDH1A2/SPTBN4/ERCC2/GLDN/CX3CR1/NFIA/RFLNA/ANGPTL8                                                                                                         |
| Biological Process | GO:1903707 | negative regulation of hemopoiesis                       | 30/2279 | 158/18866 | 0.0077883 | 0.1637087 | 0.1481294 | 30 | ZFPM1/RUNX1/INPP5D/PIK3R1/ITPKB/UBASH3B/LOXL3/FBXO7/ZBTB16/DLL1/SMAD7/ZBTB7B/RARA/TMEM178A/LILRB4/NF1/ZC3H8/PGLYRP1/MEIS2/LRRC17/NFE2L2/HOXA9/MEIS1/NOTCH1/LTF/HLX/RUNX3/TRIB1/INHBA/TMEM131L                                                                                                                                                                                                      |
| Biological Process | GO:2000116 | regulation of cysteine-type endopeptidase activity       | 42/2279 | 239/18866 | 0.0079094 | 0.165887  | 0.1501004 | 42 | NLRC4/S100A8/GRAMD4/AIM2/PPARG/GSN/RPS6KA1/LCK/NLRP3/SMAD3/ARRB1/MEFV/TNF/TRAFF2/CYFIP2/MICAL1/TBC1D10A/CTSD/THBS1/CTSH/RIPK1/PAX2/CIDEB/AQP1/PERP/POR/DNAJB6/BCL10/ATP2A3/NOL3/ARRB2/FIS1/PIH1D1/P2RX1/F2R/LTF/CASP1/BCL2L13/ASPH/NODAL/FADD/PCID2                                                                                                                                                |
| Biological Process | GO:0002763 | positive regulation of myeloid leukocyte differentiation | 14/2279 | 58/18866  | 0.007954  | 0.1664555 | 0.1506148 | 14 | CREB1/MIR145/RUNX1/PRKCA/TNF/TESC/RIPK1/TGFB1/CD101/TMEM64/RB1/TRIB1/LIF/FADD                                                                                                                                                                                                                                                                                                                      |
| Biological Process | GO:0006643 | membrane lipid metabolic process                         | 38/2279 | 212/18866 | 0.0080885 | 0.1688986 | 0.1528254 | 38 | PLA2G15/FUT7/SPTLC2/HEXB/PIGL/PIGU/GPLD1/GALC/TNF/SMPDL3B/ORMDL3/CERS6/PIGN/TNFRSF1A/SPHK2/SGMS1/B3GNT5/MGST2/ST8SIA6/ST3GAL4/PPP2R1A/SGMS2/B4GALT3/TEX2/SGPP1/SGPP2/PIGQ/P2RX1/FA2H/ESYT1/CERS2/PDXDC1/CERK/SIRT3/ST3GAL2/PRKAA1/TLCD3B/PLPP3                                                                                                                                                     |
| Biological Process | GO:0031346 | positive regulation of cell projection organization      | 64/2279 | 394/18866 | 0.0081922 | 0.1704012 | 0.154185  | 64 | HDAC4/CPNE6/PLXNC1/RREB1/DEF8/AP2A1/LCN2/TMEM30A/ZMYND8/ARHGFE7/DNM2/CPNE5/ZEB2/ITSN1/ARAP1/NAV3/CDC42EP1/DISC1/CUX1/BAIAP2/SNX3/CEP135/ILK/WASL/FGFR1/SEMA4D/RAPGEF2/SMURF1/EP8L3/SS18L2/EP8L1/PFN1/CPEB3/CAMK1D/ESPN/HTT/CDH4/GRN/PALM/CREB3L2/PLEKHM1/PRKCI/NFE2L2/NCKAP1/RALA/ARSB/NTRK1/DNM3/CORO1C/CDKL3/DNM1L/AVIL/SHANK2/SYT17/ANKRD1/MARK2/CYFIP1/TRPV2/NDEL1/CUX2/DBNL/SEPTIN9/PRKN/P3H1 |
| Biological Process | GO:0002224 | toll-like receptor signaling pathway                     | 29/2279 | 152/18866 | 0.0082085 | 0.1704012 | 0.154185  | 29 | S100A8/GFI1/GRAMD4/MIR140/PIK3AP1/SMPDL3B/TNFAIP3/SFTPD/TLR9/RTN4/RIPK1/COLEC12/SCIMP/TREML4/TNIP1/BCL10/CTSB/ARRB2/ITGB2/IRAK2/PRKCE/WDFY1/LTF/MAPKAPK3/TYRO3/FLOT1/UBE2D2/FADD/PELI1                                                                                                                                                                                                             |
| Biological Process | GO:0051146 | striated muscle cell differentiation                     | 50/2279 | 295/18866 | 0.0082212 | 0.1704012 | 0.154185  | 50 | HDAC4/EHD1/RXRA/CALR/CD9/CTDP1/MYO18B/TTN/CASQ2/MYH11/AKAP13/SKI/MAML1/SLC8A1/MIR199A1/TANC1/NFATC2/TNNT3/SMYD3/MYH9/SYNPO2L/DLL1/RBPJ/MIR24-2/MIR23A/TGFB1/TMOD3/RARA/ACTG1/WDR1/ARRB2/SORT1/ANKRD2/RB1/BCL2/MIR199A2/NOTCH1/MEF2C/FHL2/FLII/PLD3/PDGFRB/DYSF/ANKRD1/TMOD1/FLOT1/SCGB3A1/CASQ1/CEACAM5/MYORG                                                                                      |
| Biological Process | GO:0006901 | vesicle coating                                          | 16/2279 | 70/18866  | 0.0082448 | 0.1704012 | 0.154185  | 16 | CTSZ/SERPINA1/TGFA/STX5/CSNK1D/TRAPPC10/CUL3/TRAPPC9/CNIH2/CD59/SEC13/ANKRD28/SEC24C/TMED2/SEC31A/TRAPPC2                                                                                                                                                                                                                                                                                          |

|                    |            |                                                       |         |           |           |           |          |    |                                                                                                                                                            |
|--------------------|------------|-------------------------------------------------------|---------|-----------|-----------|-----------|----------|----|------------------------------------------------------------------------------------------------------------------------------------------------------------|
| Biological Process | GO:0007272 | ensheathment of neurons                               | 27/2279 | 139/18866 | 0.0082681 | 0.1704012 | 0.154185 | 27 | ARHGEF10/SH3TC2/CD9/HEXB/SKI/LGI4/TNFRSF1B/NDRG1/GALC/EIF2B5/TG/PMP22/MBP/ILK/CLU/TNFRSF21/RARA/MYO5A/NF1/EPB41L3/JAM3/RARG/TSPAN2/FA2H/CNTNAP1/ANK2/ERCC2 |
| Biological Process | GO:0008366 | axon ensheathment                                     | 27/2279 | 139/18866 | 0.0082681 | 0.1704012 | 0.154185 | 27 | ARHGEF10/SH3TC2/CD9/HEXB/SKI/LGI4/TNFRSF1B/NDRG1/GALC/EIF2B5/TG/PMP22/MBP/ILK/CLU/TNFRSF21/RARA/MYO5A/NF1/EPB41L3/JAM3/RARG/TSPAN2/FA2H/CNTNAP1/ANK2/ERCC2 |
| Biological Process | GO:0030397 | membrane disassembly                                  | 6/2279  | 16/18866  | 0.008423  | 0.1706321 | 0.154394 | 6  | DCTN1/PRKCA/PRKCB/NEK6/NDEL1/LPIN1                                                                                                                         |
| Biological Process | GO:0033033 | negative regulation of myeloid cell apoptotic process | 6/2279  | 16/18866  | 0.008423  | 0.1706321 | 0.154394 | 6  | MAEA/ITPKB/CCL5/CLEC5A/NOD2/BCL2                                                                                                                           |
| Biological Process | GO:0034116 | positive regulation of heterotypic cell-cell adhesion | 6/2279  | 16/18866  | 0.008423  | 0.1706321 | 0.154394 | 6  | IL10/LCK/CEACAM6/TNF/GCNT2/FLOT1                                                                                                                           |
| Biological Process | GO:0051081 | nuclear envelope disassembly                          | 6/2279  | 16/18866  | 0.008423  | 0.1706321 | 0.154394 | 6  | DCTN1/PRKCA/PRKCB/NEK6/NDEL1/LPIN1                                                                                                                         |
| Biological Process | GO:0051127 | positive regulation of actin nucleation               | 6/2279  | 16/18866  | 0.008423  | 0.1706321 | 0.154394 | 6  | TRIM27/GSN/WHAMM/WASL/NCKAP1/CYFIP1                                                                                                                        |
| Biological Process | GO:0071380 | cellular response to prostaglandin E stimulus         | 6/2279  | 16/18866  | 0.008423  | 0.1706321 | 0.154394 | 6  | PPARG/P2RY6/GNG2/ACACA/PRKCE/PRKAA1                                                                                                                        |
| Biological Process | GO:0072109 | glomerular mesangium development                      | 6/2279  | 16/18866  | 0.008423  | 0.1706321 | 0.154394 | 6  | PDGFD/IL6R/PDGFB/NOTCH1/GPR4/PDGFRB                                                                                                                        |

|                    |            |                                                              |         |           |           |           |           |    |                                                                                                                                                                                                                                                                                                                                                               |
|--------------------|------------|--------------------------------------------------------------|---------|-----------|-----------|-----------|-----------|----|---------------------------------------------------------------------------------------------------------------------------------------------------------------------------------------------------------------------------------------------------------------------------------------------------------------------------------------------------------------|
| Biological Process | GO:0099170 | postsynaptic modulation of chemical synaptic transmission    | 6/2279  | 16/18866  | 0.008423  | 0.1706321 | 0.154394  | 6  | RNF19A/GHRL/PLCB1/CDH1/CYFIP1/SYNPO                                                                                                                                                                                                                                                                                                                           |
| Biological Process | GO:0071402 | cellular response to lipoprotein particle stimulus           | 10/2279 | 36/18866  | 0.0085052 | 0.1719311 | 0.1555693 | 10 | CD9/PPARG/ABCG1/MIA3/ABCA1/ITGB2/NPC1/CD68/HMGCS1/ADTRP                                                                                                                                                                                                                                                                                                       |
| Biological Process | GO:0050708 | regulation of protein secretion                              | 58/2279 | 352/18866 | 0.0085437 | 0.1723437 | 0.1559427 | 58 | SORL1/NADK/IL10/TTN/C1QTNF3/ITPR2/MYRIP/CLEC9A/CACNA1C/LRP5L/RAB11FIP1/FRMD4A/ARRB1/PRKCA/MIR199A1/GPLD1/FGR/TNF/TRAF2/MYO18A/CCL5/ABCG1/GJA5/RHBD F2/TLR9/CLECSA/ITPR1/RFX3/TCF7L2/TGFB1/ENY2/GIPR/BLK/NR1H2/GHRL/KLF7/ARNTL/MYOM1/PER2/SLC16A1/MIR199A2/DNM1L/PRKCE/F2R/SLC2A1/ANKRD1/SREBF1/ADTRP/C ADM1/CPT1A/CD33/RPH3AL/EZR/C2CD2L/SIRT3/PRKN/P3H1/CCN4 |
| Biological Process | GO:0045639 | positive regulation of myeloid cell differentiation          | 21/2279 | 101/18866 | 0.0086138 | 0.1733902 | 0.1568896 | 21 | CREB1/MIR145/RUNX1/INPP5D/PRKCA/TNF/TESC/BRD1/RIPK1/MTURN/TGFB1/CD101/CSF3/TMEM64/ETS1/RB1/TRIB1/KAT7/INHBA/LIF/FADD                                                                                                                                                                                                                                          |
| Biological Process | GO:0048813 | dendrite morphogenesis                                       | 28/2279 | 146/18866 | 0.0086446 | 0.1736417 | 0.1571172 | 28 | YWHAH/BTBD3/EPHB3/SLC11A2/TNIK/CUX1/BAIAP2/ILK/SDC2/WASL/FARP1/SEMA4D/RAPGEF2/SS18L2/SIPA1L1/MAPK8IP2/KLF7/DOCK10/DNM3/CDKL3/DNM1L/SHANK2/UBE3A/N EDD4/HECW2/DTNBP1/CUX2/DBNL                                                                                                                                                                                 |
| Biological Process | GO:0007254 | JNK cascade                                                  | 38/2279 | 213/18866 | 0.0087287 | 0.1748865 | 0.1582435 | 38 | HIPK3/ERN1/ZNF622/TNF/ZEB2/TRAF2/TRAF1/PHLPP1/HIPK2/TLR9/DUSP22/TNIK/RIPK1/APP/IGF1R/MTURN/AXIN1/COP55/UBE2V1/SH3RF3/SH2D3C/STK3/PLCB1/MAPK8IP2/TAOK3 /IRAK2/NOD2/PER1/DUSP3/GADD45G/TRIB1/CYLD/ANKRD6/DTNBP1/MECOM/DBNL/PRKN/MAP3K20                                                                                                                         |
| Biological Process | GO:0010769 | regulation of cell morphogenesis involved in differentiation | 52/2279 | 310/18866 | 0.0087434 | 0.1748865 | 0.1582435 | 52 | SEMA6B/P4HB/PLXNC1/RREB1/TACSTD2/CALR/KIF13B/KANK1/YWHAH/DOCK1/ITGB1BP1/ARHGEF7/CTTN/DNM2/ZEB2/EPHB3/SEMA4A/RTN4/TNIK/DISC1/CUX1/BAIAP2/SEMA4B/A CTN4/IFRD1/ILK/PREX1/SDC2/SYNGAP1/SEMA4D/RAPGEF2/ZSWIM5/SS18L2/OLFM4/CDH4/SIPA1L1/CASS4/DNM3/CORO1C/CDKL3/DNM1L/UBE3A/NEDD4/HECW2/MARK2/CYFIP1/ TRPV2/NDEL1/MYADM/CUX2/DBNL/SPART                            |
| Biological Process | GO:0045834 | positive regulation of lipid metabolic process               | 29/2279 | 153/18866 | 0.0089902 | 0.1789036 | 0.1618783 | 29 | PNPLA2/PPARG/CREB1/MFSD2A/GPLD1/FGR/TNF/ABCG1/FPR2/TNFRSF1A/FLT1/SPHK2/TGFB1/RDH10/POR/NR1H2/VAV2/ATG14/PDGFB/NOD2/PRKCE/ABHD5/AGTR1/PDGFRB/SRE BF1/CPT1A/SIRT3/VAV3/PRKAA1                                                                                                                                                                                   |
| Biological Process | GO:0008333 | endosome to lysosome transport                               | 13/2279 | 53/18866  | 0.0090007 | 0.1789036 | 0.1618783 | 13 | MGRN1/LYST/TGFBRAP1/KIF13A/SNX27/DENND3/BIN1/VPS18/CLEC16A/ATG14/HOOK2/SORT1/MVB12A                                                                                                                                                                                                                                                                           |

|                    |            |                                                                  |         |           |           |           |           |    |                                                                                                                                                                                                                                                                                                                                                                                                                                                           |
|--------------------|------------|------------------------------------------------------------------|---------|-----------|-----------|-----------|-----------|----|-----------------------------------------------------------------------------------------------------------------------------------------------------------------------------------------------------------------------------------------------------------------------------------------------------------------------------------------------------------------------------------------------------------------------------------------------------------|
| Biological Process | GO:0045599 | negative regulation of fat cell differentiation                  | 13/2279 | 53/18866  | 0.0090007 | 0.1789036 | 0.1618783 | 13 | ZFPM1/TRIO/SMAD3/TNF/TGFB1/TGFB11/WVTR1/SORT1/ARNTL/FOXO1/ZADH2/TLCD3B/CCN4                                                                                                                                                                                                                                                                                                                                                                               |
| Biological Process | GO:0014044 | Schwann cell development                                         | 9/2279  | 31/18866  | 0.0090727 | 0.1793754 | 0.1623052 | 9  | ARHGEF10/SH3TC2/SKI/LGI4/NDRG1/ILK/NF1/FA2H/CNTNAP1                                                                                                                                                                                                                                                                                                                                                                                                       |
| Biological Process | GO:1905476 | negative regulation of protein localization to membrane          | 9/2279  | 31/18866  | 0.0090727 | 0.1793754 | 0.1623052 | 9  | KCNE1/ITGB1BP1/MRAP/PPFIA1/LZTFL1/TGFB1/NUMB/CSK/BCL2L1                                                                                                                                                                                                                                                                                                                                                                                                   |
| Biological Process | GO:0055074 | calcium ion homeostasis                                          | 74/2279 | 468/18866 | 0.0090811 | 0.1793754 | 0.1623052 | 74 | ELANE/TRPM2/PDE4D/CALR/C3AR1/THADA/CASQ2/ITPR2/LCK/HEXB/CD55/CACNA1C/SLC24A4/VDR/CCR2/SMAD3/SLC8A1/MIR199A1/ANXA6/UBASH3B/CDH23/CCL5/PACS2/FPR2/FPR1/ATP2B2/ITPR1/ACKR2/DISC1/JSRP1/C5AR2/APP/PTPN6/RASA3/GNAT2/P2RY6/CCR9/PRKCB/TMEM178A/MYO5A/GIPR/HTT/GHRL/PTPRC/TMEM64/CXCR1/ATP2A3/NOL3/TPCN2/IMMT/FIS1/BCL2/MIR199A2/GSTO1/P2RX1/LPAR2/PRKCE/F2R/PDZD8/S1PR4/GPR4/AGTR1/ANK2/CHERP/PLCG1/ATP7B/P2RX5/TRPV2/CASQ1/GRINA/SYPL2/ANXA7/CX3CR1/SYNP<br>O |
| Biological Process | GO:0008625 | extrinsic apoptotic signaling pathway via death domain receptors | 19/2279 | 89/18866  | 0.0091019 | 0.1794135 | 0.1623397 | 19 | ITPRIP/PIK3R1/TNF/TRAF2/TNFAIP3/DEDD2/THBS1/RIPK1/TNFRSF1A/NF1/BMPR1B/STK3/TRPS1/SORT1/BCL2/SP100/ARHGEF2/BCL2L1/FADD                                                                                                                                                                                                                                                                                                                                     |
| Biological Process | GO:0010959 | regulation of metal ion transport                                | 64/2279 | 396/18866 | 0.0091372 | 0.179736  | 0.1626315 | 64 | PDE4D/TRIM27/RCVRN/KCNE1/KCNAB2/THADA/IL16/CASQ2/WWP2/FXYD2/CACNA1C/YWHAH/FXYD1/MYLK/SLC8A1/DNM2/UBASH3B/CCL5/CD84/TLR9/TESC/BIN1/JSRP1/AHNAK/GNAI2/NOS1AP/PTPN6/ACTN4/KCNIP1/P2RY6/SPHK2/MYO5A/HTT/CAB39/PDGFB/SNTA1/KCNQ1/ARRB2/BCL2/PER1/GSTO1/P2RX1/PRKCE/F2R/TMC1/NEDD4/PDGFRB/ANO6/DYSF/CACNA1B/ANK2/HECW2/PLCG1/P2RX5/TRPV2/CD33/CASQ1/SPTBN4/FGF14/GRAMD2A/CBARP/STIMATE/SARAF/CRACR2A                                                            |
| Biological Process | GO:0031663 | lipopolysaccharide-mediated signaling pathway                    | 14/2279 | 59/18866  | 0.0092969 | 0.1804668 | 0.1632928 | 14 | CD55/PRKCA/TNF/TNFAIP3/CCL5/SCIMP/TGFB1/LY86/TRIM5/BCL10/IRAK2/PRKCE/LTF/TRIB1                                                                                                                                                                                                                                                                                                                                                                            |
| Biological Process | GO:0002693 | positive regulation of cellular extravasation                    | 7/2279  | 21/18866  | 0.0092975 | 0.1804668 | 0.1632928 | 7  | ELANE/FUT4/FUT7/IL1R1/CCR2/PDGFD/FADD                                                                                                                                                                                                                                                                                                                                                                                                                     |
| Biological Process | GO:0030220 | platelet formation                                               | 7/2279  | 21/18866  | 0.0092975 | 0.1804668 | 0.1632928 | 7  | ZFPM1/MYH9/ACTN1/PTPN6/ZNF385A/WDR1/MEF2C                                                                                                                                                                                                                                                                                                                                                                                                                 |

|                    |            |                                                             |         |           |           |           |           |    |                                                                                                                                                                                                                                                                                                                                                                                                                                                              |
|--------------------|------------|-------------------------------------------------------------|---------|-----------|-----------|-----------|-----------|----|--------------------------------------------------------------------------------------------------------------------------------------------------------------------------------------------------------------------------------------------------------------------------------------------------------------------------------------------------------------------------------------------------------------------------------------------------------------|
| Biological Process | GO:0032288 | myelin assembly                                             | 7/2279  | 21/18866  | 0.0092975 | 0.1804668 | 0.1632928 | 7  | CD9/PMP22/ILK/EPB41L3/CNTNAP1/ANK2/ERCC2                                                                                                                                                                                                                                                                                                                                                                                                                     |
| Biological Process | GO:1903599 | positive regulation of autophagy of mitochondrion           | 7/2279  | 21/18866  | 0.0092975 | 0.1804668 | 0.1632928 | 7  | VPS13D/FBXO7/CAMKK2/SMURF1/HTT/HK2/PRKN                                                                                                                                                                                                                                                                                                                                                                                                                      |
| Biological Process | GO:0008593 | regulation of Notch signaling pathway                       | 22/2279 | 108/18866 | 0.0093011 | 0.1804668 | 0.1632928 | 22 | MAML3/WWP2/SLC35C2/MAML1/ITGB1BP1/AAK1/TSPAN14/ARRB1/MAML2/EGFL7/DLL1/RBPJ/ZMIZ1/EPN2/CREBBP/PRKCI/TSPPEAR/NOD2/NOTCH1/NOTCH4/DLK1/PRAG1                                                                                                                                                                                                                                                                                                                     |
| Biological Process | GO:0009896 | positive regulation of catabolic process                    | 72/2279 | 454/18866 | 0.0093073 | 0.1804668 | 0.1632928 | 72 | PNPLA2/TRIM27/RNF144A/SORL1/FZR1/RNF19A/STX5/TRIM38/TRIM8/WWP2/PRR5L/SPTLC2/CSNK1D/ULK1/LPCAT1/TNFRSF1B/PFKFB4/VPS13D/TNRC6B/MEFV/GPLD1/TNF/TNFAIP3/FBXO7/VGLL4/CBFA2T3/LARP1/CAMKK2/ZC3H12D/DISC1/EDEM1/PIP4K2A/APP/CLU/SMAD7/UVRAG/AGO2/SMURF1/AXIN1/RUFY4/TRIM5/CLEC16A/CPEB3/HTT/HK2/EDEM2/SH3BP4/CSNK1E/FTO/NFE2L2/ESRRB/RNF144B/PRKCE/NEDD4/ABHD5/TSC2/RNF14/FOXO1/TRIB1/TNFSF12/HECW2/CPT1A/EZR/RNF40/PFKFB3/SVIP/NPRL2/PRKAA1/GRSF1/STING1/PRKN/VSIR |
| Biological Process | GO:0031664 | regulation of lipopolysaccharide-mediated signaling pathway | 8/2279  | 26/18866  | 0.0094049 | 0.1810721 | 0.1638405 | 8  | CD55/PRKCA/TNFAIP3/SCIMP/LY86/TRIM5/LTF/TRIB1                                                                                                                                                                                                                                                                                                                                                                                                                |
| Biological Process | GO:0060074 | synapse maturation                                          | 8/2279  | 26/18866  | 0.0094049 | 0.1810721 | 0.1638405 | 8  | DISC1/PFN1/NRXN1/PALM/YWHAZ/ARHGEF15/CX3CR1/NFIA                                                                                                                                                                                                                                                                                                                                                                                                             |
| Biological Process | GO:0060765 | regulation of androgen receptor signaling pathway           | 8/2279  | 26/18866  | 0.0094049 | 0.1810721 | 0.1638405 | 8  | FOXP1/NCOR2/PRMT2/HDAC1/PHB/ARRB2/RNF14/NODAL                                                                                                                                                                                                                                                                                                                                                                                                                |
| Biological Process | GO:0043434 | response to peptide hormone                                 | 71/2279 | 447/18866 | 0.0094195 | 0.1810721 | 0.1638405 | 71 | PRKCZ/BSG/SORL1/FUT7/IL10/PPARG/ADCY2/KANK1/CREB1/PTPRE/MIR143/MIR145/PRKAR1B/ADCY9/PIK3R1/RAP1B/GPLD1/RAB31/EIF2B5/ABCC2/STAT5A/BAIAP2L1/BAIAP2/GRB10/GNAI2/ATP6V1B2/ZDHHC7/PXN/IGF1R/ZBTB7B/CRHBP/FER/PRKCB/POR/MYO5A/ARID1B/GHRL/CSK/AGTRAP/CAT/PRKCI/NFE2L2/SORT1/ADCY4/INSRR/PKM/ATP6V0B/BCAR3/PCK2/AGTR1/MYO1C/TSC2/SLC2A1/FOXO1/MBD5/HHEX/SOGA1/SREBF1/KBTBD2/PDE3B/CYFIP1/RELA/WDTC1/NDEL1/LPIN1/RNF40/HSD11B2/PRKAA1/MARS1/ATP6VOC/ATP6V1C1         |
| Biological Process | GO:0032729 | positive regulation of interferon-gamma production          | 15/2279 | 65/18866  | 0.0094466 | 0.1810721 | 0.1638405 | 15 | IL27/PDE4D/ZFPM1/IRF8/SLC11A1/IL1R1/CCR2/TNF/TLR9/CD226/SLC7A5/IL18R1/BCL3/FADD/CYRIB                                                                                                                                                                                                                                                                                                                                                                        |

|                    |            |                                                           |         |           |           |           |           |    |                                                                                                                                                                                                                                                                                                                                                                                                                                                           |
|--------------------|------------|-----------------------------------------------------------|---------|-----------|-----------|-----------|-----------|----|-----------------------------------------------------------------------------------------------------------------------------------------------------------------------------------------------------------------------------------------------------------------------------------------------------------------------------------------------------------------------------------------------------------------------------------------------------------|
| Biological Process | GO:0000266 | mitochondrial fission                                     | 11/2279 | 42/18866  | 0.0094719 | 0.1810721 | 0.1638405 | 11 | INF2/DNM2/DNM1/FIS1/DNM3/DNM1L/MIEF1/MX1/DHODH/PRKN/CYRIB                                                                                                                                                                                                                                                                                                                                                                                                 |
| Biological Process | GO:1902622 | regulation of neutrophil migration                        | 11/2279 | 42/18866  | 0.0094719 | 0.1810721 | 0.1638405 | 11 | FUT7/C3AR1/RHOH/IL1R1/RHOG/CSAR2/JAM3/CAMK1D/DAPK2/DNM1L/DYSF                                                                                                                                                                                                                                                                                                                                                                                             |
| Biological Process | GO:0009306 | protein secretion                                         | 73/2279 | 462/18866 | 0.0096636 | 0.1822909 | 0.1649433 | 73 | SORL1/NADK/IL10/TTN/C1QTNF3/ITPR2/TANGO2/MYRIP/CLEC9A/CACNA1C/LRP5L/NLRP3/RAB11FIP1/FRMD4A/ARRB1/PRKCA/MIR199A1/GPLD1/FGR/TNF/traf2/MYO18A/CCL5/ABCG1/GJA5/RHBDF2/TNFSF13B/TLR9/CLEC5A/ITPR1/RFX3/TCF7L2/MIA3/HNF1A/PTPRN2/SPHK2/TGFB1/IL1RN/ENY2/MYO5A/GIPR/BLK/NR1H2/GHRL/KLF7/ARNTL/MYOM1/PER2/SLC16A1/NOD2/POU2F2/MIR199A2/DNM1L/PRKCE/traf3IP2/F2R/LMF1/SLC2A1/DYSF/ANKRD1/SREBF1/ADTRP/CADM1/CPT1A/CD33/RPH3AL/EZR/C2CD2L/SIRT3/MIA2/PRKN/P3H1/CCN4 |
| Biological Process | GO:0031331 | positive regulation of cellular catabolic process         | 63/2279 | 390/18866 | 0.0097342 | 0.1822909 | 0.1649433 | 63 | PNPLA2/TRIM27/RNF144A/FZR1/RNF19A/TRIM38/TRIM8/PRR5L/SPTLC2/CSNK1D/ULK1/TNFRSF1B/PFKFB4/VPS13D/TNRC6B/MEFV/GPLD1/TNF/TNFAIP3/FBXO7/VGLL4/CBFA2T3/LARP1/CAMKK2/ZC3H12D/DISC1/EDEM1/PIP4K2A/APP/CLU/SMAD7/UVRAG/AGO2/SMURF1/AXIN1/RUFY4/TRIM5/CLEC16A/CPEB3/HTT/HK2/EDEM2/SH3BP4/CSNK1E/FTO/NFE2L2/ESRRB/RNF144B/ABHD5/TSC2/RNF14/FOXO1/TRIB1/CPT1A/EZR/RNF40/PFKFB3/SVIP/NPRL2/PRKAA1/GRSF1/STING1/PRKN                                                    |
| Biological Process | GO:0010755 | regulation of plasminogen activation                      | 5/2279  | 12/18866  | 0.0097454 | 0.1822909 | 0.1649433 | 5  | CTSZ/ENO1/THBS1/F12/CPB2                                                                                                                                                                                                                                                                                                                                                                                                                                  |
| Biological Process | GO:0032494 | response to peptidoglycan                                 | 5/2279  | 12/18866  | 0.0097454 | 0.1822909 | 0.1649433 | 5  | IRF5/NLRP3/DEFB124/NOD2/RELA                                                                                                                                                                                                                                                                                                                                                                                                                              |
| Biological Process | GO:0035845 | photoreceptor cell outer segment organization             | 5/2279  | 12/18866  | 0.0097454 | 0.1822909 | 0.1649433 | 5  | MFSD2A/CRB1/IFT140/CDHR1/NPHP4                                                                                                                                                                                                                                                                                                                                                                                                                            |
| Biological Process | GO:0043301 | negative regulation of leukocyte degranulation            | 5/2279  | 12/18866  | 0.0097454 | 0.1822909 | 0.1649433 | 5  | ABR/CCR2/CD84/HLA-F/BCR                                                                                                                                                                                                                                                                                                                                                                                                                                   |
| Biological Process | GO:1902337 | regulation of apoptotic process involved in morphogenesis | 5/2279  | 12/18866  | 0.0097454 | 0.1822909 | 0.1649433 | 5  | TNFRSF1B/VDR/TNFRSF1A/PAX2/NOTCH1                                                                                                                                                                                                                                                                                                                                                                                                                         |



|                    |            |                                                                                   |         |           |           |           |           |    |                                                                                                                                                                                                                                                                                                                                                                                   |
|--------------------|------------|-----------------------------------------------------------------------------------|---------|-----------|-----------|-----------|-----------|----|-----------------------------------------------------------------------------------------------------------------------------------------------------------------------------------------------------------------------------------------------------------------------------------------------------------------------------------------------------------------------------------|
| Biological Process | GO:2001241 | positive regulation of extrinsic apoptotic signaling pathway in absence of ligand | 5/2279  | 12/18866  | 0.0097454 | 0.1822909 | 0.1649433 | 5  | NF1/PPP2R1A/PPP2R1B/INHBA/DAPK3                                                                                                                                                                                                                                                                                                                                                   |
| Biological Process | GO:0001701 | in utero embryonic development                                                    | 62/2279 | 383/18866 | 0.0098227 | 0.1822909 | 0.1649433 | 62 | RXRA/IL10/MYO18B/BRCA2/ANGPT1/ADCY9/SETD2/ANKRD11/SMAD3/SPINT2/CMIP/CCM2/CHST11/E2F7/RTN4/HSD17B2/TGFBR2/CUL3/MYH9/HM13/ATP11A/RBPJ/MIB1/ZMIZ1/APBA2/FGFR1/RDH10/SP3/DNAJB6/KDM4C/STK3/GRHL2/NCOA1/ST8SIA6/PDGFB/ZNF335/GJB3/VASH1/COPS3/ADD1/NXN/NOTCH1/EPAS1/GGNBP2/GNA12/TMED2/CEBPB/PCDH12/PDGFRB/CHD8/BCL2L1/NSRP1/PLCG1/WBTC1/NDEL1/PLCD3/NODAL/HES3/ERCC2/LIF/ETNK2/TENT5C |
| Biological Process | GO:0006855 | drug transmembrane transport                                                      | 4/2279  | 8/18866   | 0.0099386 | 0.1822909 | 0.1649433 | 4  | TMEM30A/ABCC2/ATP8B1/ABCC3                                                                                                                                                                                                                                                                                                                                                        |
| Biological Process | GO:0015820 | leucine transport                                                                 | 4/2279  | 8/18866   | 0.0099386 | 0.1822909 | 0.1649433 | 4  | SLC43A2/SLC7A5/SLC43A1/SLC7A8                                                                                                                                                                                                                                                                                                                                                     |
| Biological Process | GO:0016185 | synaptic vesicle budding from presynaptic endocytic zone membrane                 | 4/2279  | 8/18866   | 0.0099386 | 0.1822909 | 0.1649433 | 4  | DNM2/DNM1/DNM3/MX1                                                                                                                                                                                                                                                                                                                                                                |
| Biological Process | GO:0035696 | monocyte extravasation                                                            | 4/2279  | 8/18866   | 0.0099386 | 0.1822909 | 0.1649433 | 4  | CCR2/PDGFD/PLCB1/JAML                                                                                                                                                                                                                                                                                                                                                             |
| Biological Process | GO:0035701 | hematopoietic stem cell migration                                                 | 4/2279  | 8/18866   | 0.0099386 | 0.1822909 | 0.1649433 | 4  | CCR2/GPLD1/JAM3/PTPRC                                                                                                                                                                                                                                                                                                                                                             |
| Biological Process | GO:0043353 | enucleate erythrocyte differentiation                                             | 4/2279  | 8/18866   | 0.0099386 | 0.1822909 | 0.1649433 | 4  | MAEA/SP3/RB1/MB                                                                                                                                                                                                                                                                                                                                                                   |
| Biological Process | GO:0048227 | plasma membrane to endosome transport                                             | 4/2279  | 8/18866   | 0.0099386 | 0.1822909 | 0.1649433 | 4  | RAB5C/RAB5B/USP6NL/SORT1                                                                                                                                                                                                                                                                                                                                                          |

|                    |            |                                                               |         |           |           |           |           |    |                                                                                                                                                                                                                                                                                                                                                                                                                                                                 |
|--------------------|------------|---------------------------------------------------------------|---------|-----------|-----------|-----------|-----------|----|-----------------------------------------------------------------------------------------------------------------------------------------------------------------------------------------------------------------------------------------------------------------------------------------------------------------------------------------------------------------------------------------------------------------------------------------------------------------|
| Biological Process | GO:0051665 | membrane raft localization                                    | 4/2279  | 8/18866   | 0.0099386 | 0.1822909 | 0.1649433 | 4  | GSN/PTPRC/RALA/DOCK2                                                                                                                                                                                                                                                                                                                                                                                                                                            |
| Biological Process | GO:0090235 | regulation of metaphase plate congression                     | 4/2279  | 8/18866   | 0.0099386 | 0.1822909 | 0.1649433 | 4  | MAD1L1/DYNC1H1/NUMA1/SPAG5                                                                                                                                                                                                                                                                                                                                                                                                                                      |
| Biological Process | GO:0097527 | necroptotic signaling pathway                                 | 4/2279  | 8/18866   | 0.0099386 | 0.1822909 | 0.1649433 | 4  | TNF/RIPK1/RIPK3/FADD                                                                                                                                                                                                                                                                                                                                                                                                                                            |
| Biological Process | GO:0098597 | observational learning                                        | 4/2279  | 8/18866   | 0.0099386 | 0.1822909 | 0.1649433 | 4  | NF1/NRXN1/HTT/NRXN2                                                                                                                                                                                                                                                                                                                                                                                                                                             |
| Biological Process | GO:1903238 | positive regulation of leukocyte tethering or rolling         | 4/2279  | 8/18866   | 0.0099386 | 0.1822909 | 0.1649433 | 4  | ELANE/FUT4/FUT7/CCR2                                                                                                                                                                                                                                                                                                                                                                                                                                            |
| Biological Process | GO:1902905 | positive regulation of supramolecular fiber organization      | 37/2279 | 208/18866 | 0.0100075 | 0.183104  | 0.165679  | 37 | ARHGEF10/TRIM27/DCTN1/GSN/ITGB1BP1/SMAD3/CTTN/NCK2/SH3PXD2B/WHAMM/BAIAP2L1/NAV3/CDC42EP1/BIN1/BAIAP2/SYNPO2L/APP/CLU/PXN/WNT11/WASL/FER/PFN1/CSF3/GMFB/NUMA1/WDR1/NCKAP1/ARHGEF10L/RB1/PRKCE/MYO1C/ARHGEF15/CYFIP1/GMFG/BAIAP2L2/SYNPO                                                                                                                                                                                                                          |
| Biological Process | GO:0071692 | protein localization to extracellular region                  | 74/2279 | 470/18866 | 0.0100215 | 0.183104  | 0.165679  | 74 | LTBP1/SORL1/NADK/IL10/TTN/C1QTNF3/ITPR2/TANGO2/MYRIP/CLEC9A/CACNA1C/LRP5L/NLRP3/RAB11FIP1/FRMD4A/ARRB1/PRKCA/MIR199A1/GPLD1/FGR/TNF/traf2/MYO18A/CCL5/ABCG1/GJA5/RHBDF2/TNFSF13B/TLR9/CLEC5A/ITPR1/RFX3/TCF7L2/MIA3/HNF1A/PTPRN2/SPHK2/TGFB1/IL1RN/ENY2/MYO5A/GIPR/BLK/NR1H2/GHRL/KLF7/ARNTL/MYOM1/PER2/SLC16A1/NOD2/POU2F2/MIR199A2/DNM1L/PRKCE/traf3IP2/F2R/LMF1/SLC2A1/DYSF/ANKRD1/SREBF1/ADTRP/CADM1/CPT1A/CD33/RPH3AL/EZR/C2CD2L/SIRT3/MIA2/PRKN/P3H1/CCN4 |
| Biological Process | GO:0035592 | establishment of protein localization to extracellular region | 73/2279 | 463/18866 | 0.0101527 | 0.1851451 | 0.1675259 | 73 | SORL1/NADK/IL10/TTN/C1QTNF3/ITPR2/TANGO2/MYRIP/CLEC9A/CACNA1C/LRP5L/NLRP3/RAB11FIP1/FRMD4A/ARRB1/PRKCA/MIR199A1/GPLD1/FGR/TNF/traf2/MYO18A/CCL5/ABCG1/GJA5/RHBDF2/TNFSF13B/TLR9/CLEC5A/ITPR1/RFX3/TCF7L2/MIA3/HNF1A/PTPRN2/SPHK2/TGFB1/IL1RN/ENY2/MYO5A/GIPR/BLK/NR1H2/GHRL/KLF7/ARNTL/MYOM1/PER2/SLC16A1/NOD2/POU2F2/MIR199A2/DNM1L/PRKCE/traf3IP2/F2R/LMF1/SLC2A1/DYSF/ANKRD1/SREBF1/ADTRP/CADM1/CPT1A/CD33/RPH3AL/EZR/C2CD2L/SIRT3/MIA2/PRKN/P3H1/CCN4       |
| Biological Process | GO:0032388 | positive regulation of intracellular transport                | 39/2279 | 222/18866 | 0.0102462 | 0.1864934 | 0.1687458 | 39 | EHD1/SORL1/TFDP1/PRR5L/TM9SF4/TMEM30A/YWHAH/ITGB1BP1/PIK3R1/SMAD3/DYNC1H1/JUP/EDEM1/USP36/ZDHHC2/TCF7L2/ABLIM3/AKAP5/UBE2J2/TGFB1/MLC1/EDEM2/NUMA1/ITGB2/YWHAZ/CDH1/FIS1/BCL2/NEDD4/TP53BP2/MYO1C/MIEF1/SPAG5/YWHAQ/EZR/PDZK1/PRKAA1/PRKN/RIPOR1                                                                                                                                                                                                                |

|                    |            |                                                                 |         |           |           |           |           |    |                                                                                                                                                                                                                                                                              |
|--------------------|------------|-----------------------------------------------------------------|---------|-----------|-----------|-----------|-----------|----|------------------------------------------------------------------------------------------------------------------------------------------------------------------------------------------------------------------------------------------------------------------------------|
| Biological Process | GO:0045730 | respiratory burst                                               | 10/2279 | 37/18866  | 0.0104211 | 0.1889512 | 0.1709698 | 10 | MPO/PIK3CD/CD55/SLC11A1/NCF4/NCF2/PGAM1/CAMK1D/GRN/BCR                                                                                                                                                                                                                       |
| Biological Process | GO:0090218 | positive regulation of lipid kinase activity                    | 10/2279 | 37/18866  | 0.0104211 | 0.1889512 | 0.1709698 | 10 | FGR/FPR2/FLT1/TGFB1/VAV2/ATG14/PDGFB/NOD2/PDGFRB/VAV3                                                                                                                                                                                                                        |
| Biological Process | GO:1905475 | regulation of protein localization to membrane                  | 35/2279 | 195/18866 | 0.010479  | 0.1896406 | 0.1715935 | 35 | PRKCZ/SSH1/KCNE1/TFDP1/GSN/YWHAH/ZMYND8/ITGB1BP1/PIK3R1/RHOG/TNF/ZDHHC2/MRAP/AKAP5/ZDHHC7/PPF1A1/LZTFL1/TGFB1/PRKCH/NUMB/CSK/PRKCI/ITGB2/YWHAZ/FLS1/BCL2/PRKCE/TP53BP2/MYO1C/MIEF1/BCL2L1/YWHAQ/EZR/PDZK1/PRKN                                                               |
| Biological Process | GO:0015748 | organophosphate ester transport                                 | 26/2279 | 135/18866 | 0.0105171 | 0.1897301 | 0.1716745 | 26 | OSBPL5/SLC25A25/ABCC1/MFSD2A/TMEM30A/ABCG1/ATP8A1/ANO7/PLTP/PITPNM2/ATP11A/SLC44A4/ATP8B1/PITPNM1/PITPNA/PCTP/ABCA1/OSBPL10/SLC37A1/ATP8B4/SLC33A1/PITPNC1/ABCC11/ANO6/SLC25A1/C2CD2L                                                                                        |
| Biological Process | GO:0043244 | regulation of protein-containing complex disassembly            | 24/2279 | 122/18866 | 0.0105239 | 0.1897301 | 0.1716745 | 24 | VILL/GSN/TNF/CAPG/NAV3/UVRAG/IGF1R/TMOD3/SVIL/CLEC16A/WDR1/SPTA1/ADD1/MAP1A/AVIL/SCAF8/FLII/ARHGEF2/SPTAN1/ASPH/TMOD1/SPTBN4/SPEF1/SHFL                                                                                                                                      |
| Biological Process | GO:0030834 | regulation of actin filament depolymerization                   | 13/2279 | 54/18866  | 0.0105754 | 0.1899277 | 0.1718533 | 13 | VILL/GSN/CAPG/TMOD3/SVIL/WDR1/SPTA1/ADD1/AVIL/FLII/SPTAN1/TMOD1/SPTBN4                                                                                                                                                                                                       |
| Biological Process | GO:0032623 | interleukin-2 production                                        | 13/2279 | 54/18866  | 0.0105754 | 0.1899277 | 0.1718533 | 13 | PDE4D/TRIM27/HDAC7/RUNX1/SLC11A1/CCR2/TRAF2/TNFAIP3/SFTPD/NAV3/PTPRC/PNP/EZR                                                                                                                                                                                                 |
| Biological Process | GO:0043406 | positive regulation of MAP kinase activity                      | 45/2279 | 264/18866 | 0.0105949 | 0.1899277 | 0.1718533 | 45 | ELANE/KSR1/TGFA/MAP3K3/MAP2K6/AKAP13/ERN1/PIK3R6/ARRB1/TNF/ZEB2/TRAF2/FPR1/TLR9/TNIK/THBS1/PIK3R5/RIPK1/ILK/FLT1/FGFR1/TGFB1/PDGFD/UBE2V1/MUC20/CXCL17/GHRL/PTPRC/CSK/PDE6H/PDGFB/MAP3K14/TAOK3/IRAK2/NTRK1/NOD2/S1PR2/F2R/PDGFC/MAPKAPK3/PDGFRB/GADD45G/DBNL/PRKAA1/MAP3K20 |
| Biological Process | GO:0008630 | intrinsic apoptotic signaling pathway in response to DNA damage | 21/2279 | 103/18866 | 0.0107725 | 0.1923854 | 0.1740772 | 21 | BRCA2/TNFRSF1B/PIK3R1/TNF/HIPK2/NACC2/ZNF385A/TNFRSF1A/CLU/CIDEB/CDIP1/DYRK2/FNIP2/BCL2/CHEK2/CRIP1/BCL2L1/BCL3/XPA/MARCH7/FBH1                                                                                                                                              |

|                    |            |                                                          |         |           |           |           |           |    |                                                                                                                                                                                                                                                      |
|--------------------|------------|----------------------------------------------------------|---------|-----------|-----------|-----------|-----------|----|------------------------------------------------------------------------------------------------------------------------------------------------------------------------------------------------------------------------------------------------------|
| Biological Process | GO:0048661 | positive regulation of smooth muscle cell proliferation  | 21/2279 | 103/18866 | 0.0107725 | 0.1923854 | 0.1740772 | 21 | ELANE/HDAC4/FOXP1/IL10/MEF2D/MYB/ERN1/TNF/CCL5/TGFBR2/THBS1/GNAI2/MIR27A/P2RY6/PHB/PDGFD/IL6R/PDGF/BNMT1/PDGFRB/CCN4                                                                                                                                 |
| Biological Process | GO:1903828 | negative regulation of cellular protein localization     | 23/2279 | 116/18866 | 0.0110168 | 0.1963803 | 0.1776919 | 23 | KCNE1/ANGPT1/ITGB1BP1/SUFU/UBAC2/DERL2/MRAP/PPFIA1/LZTFL1/TGFB1/LILRB4/NF1/NUMB/ANKRD13A/CSK/INPP5E/ASTN2/MAP1A/CABP1/SP100/BCL2L1/SVIP/ILRUN                                                                                                        |
| Biological Process | GO:0007160 | cell-matrix adhesion                                     | 40/2279 | 230/18866 | 0.0110973 | 0.1969042 | 0.1781659 | 40 | PRKCZ/PLAU/COL17A1/RIN2/ITGB1BP1/PIK3R1/CEACAM6/SMAD3/ARHGEF7/CTTN/DUSP22/WHAMM/JUP/THBS1/DISC1/NINJ1/ACTN1/ITGA2B/ILK/ITGB5/PPFIA1/PTPRJ/NF1/ADAMTS13/JAM3/TESK2/ITGB3/ACTG1/PLEKHA2/BCR/ITGB2/LYVE1/BCL2/LYPD5/CORO1C/PARVG/DUSP3/CD96/ITGB6/DAPK3 |
| Biological Process | GO:0006367 | transcription initiation from RNA polymerase II promoter | 34/2279 | 189/18866 | 0.0111354 | 0.1969042 | 0.1781659 | 34 | RXRA/MAML3/PPARG/NR1I2/CREB1/MAML1/VDR/E2F3/MAML2/POLR2F/RBPJ/TAF10/HNF1A/RARA/MED13/NR1H2/WWTR1/ATF7IP/RARG/RUNX2/CREBBP/CCNH/ESRRB/MED8/NOTCH1/MED25/SUB1/NOTCH4/ERCC1/TEAD2/NR5A2/XPA/ERCC2/PAXIP1                                                |
| Biological Process | GO:0032872 | regulation of stress-activated MAPK cascade              | 41/2279 | 237/18866 | 0.0111168 | 0.1969042 | 0.1781659 | 41 | MAP3K3/HIPK3/ERN1/ZNF622/TNF/ZEB2/TRAF2/TRAF1/PHLPP1/HIPK2/TLR9/DUSP22/TNIK/RIPK1/APP/IGF1R/MTURN/SCIMP/AXIN1/COP5/SH3RF3/STK3/PLCB1/MAPK8IP2/TAOK3/MIR138-2/NOD2/PER1/DUSP3/FOXO1/FOXO1/GADD45G/GDF6/CYLD/ANKRD6/EZR/DTNBP1/MECOM/DBNL/PRKN/MAP3K20 |
| Biological Process | GO:0006476 | protein deacetylation                                    | 20/2279 | 97/18866  | 0.0111705 | 0.1969042 | 0.1781659 | 20 | HDAC4/SPRED2/HDAC7/SIN3B/SKI/C6orf89/HDAC1/SPHK2/ZBTB7B/PHB/MTA1/CTBP1/MTA2/PER2/PER1/NEK3/SREBF1/ELK4/SIRT3/PRKAA1                                                                                                                                  |
| Biological Process | GO:0032651 | regulation of interleukin-1 beta production              | 20/2279 | 97/18866  | 0.0111705 | 0.1969042 | 0.1781659 | 20 | AZU1/NLRC4/FOXP1/AIM2/NLRP3/SMAD3/MEFV/TNF/TNFAIP3/MIR101-2/MNDA/APP/GHRL/ARRB2/NOD2/F2R/CASP1/CD33/CX3CR1/STMP1                                                                                                                                     |
| Biological Process | GO:0046634 | regulation of alpha-beta T cell activation               | 20/2279 | 97/18866  | 0.0111705 | 0.1969042 | 0.1781659 | 20 | IL27/PRKCZ/MYB/RUNX1/CD55/NLRP3/ITPKB/CCR2/LOXL3/ZBTB16/TGFBR2/SMAD7/ZBTB7B/RARA/PTPRC/PNP/HLX/RUNX3/AP3D1/VSIR                                                                                                                                      |
| Biological Process | GO:0002063 | chondrocyte development                                  | 9/2279  | 32/18866  | 0.0112988 | 0.1975092 | 0.1787133 | 9  | CHSY1/CHST11/TGFBR2/SMAD7/POC1A/RARG/BMP1B/RUNX2/RFLNA                                                                                                                                                                                               |

|                    |            |                                                     |         |           |           |           |           |    |                                                                                                                                                                                                                                                                                                                                                              |
|--------------------|------------|-----------------------------------------------------|---------|-----------|-----------|-----------|-----------|----|--------------------------------------------------------------------------------------------------------------------------------------------------------------------------------------------------------------------------------------------------------------------------------------------------------------------------------------------------------------|
| Biological Process | GO:0002724 | regulation of T cell cytokine production            | 9/2279  | 32/18866  | 0.0112988 | 0.1975092 | 0.1787133 | 9  | PRKCZ/TNFRSF1B/NLRP3/IL1R1/CCR2/TRAF2/HLA-F/SMAD7/IL18R1                                                                                                                                                                                                                                                                                                     |
| Biological Process | GO:0045761 | regulation of adenylate cyclase activity            | 9/2279  | 32/18866  | 0.0112988 | 0.1975092 | 0.1787133 | 9  | TIMP2/CACNA1C/CCR2/GNAI2/AKAP5/LTB4R2/NF1/PALM/GABBR2                                                                                                                                                                                                                                                                                                        |
| Biological Process | GO:0061036 | positive regulation of cartilage development        | 9/2279  | 32/18866  | 0.0112988 | 0.1975092 | 0.1787133 | 9  | SMAD3/ZBTB16/SMAD7/POR/BMP1B/RUNX2/GDF6/RELA/ZNF219                                                                                                                                                                                                                                                                                                          |
| Biological Process | GO:0055002 | striated muscle cell development                    | 31/2279 | 169/18866 | 0.0113463 | 0.1975092 | 0.1787133 | 31 | HDAC4/CTDP1/MYO18B/TTN/CASQ2/MYH11/AKAP13/SKI/MAML1/SLC8A1/MIR199A1/NFATC2/TNNT3/SMYD3/SYNPO2L/MIR24-2/MIR23A/TMOD3/ACTG1/WDR1/BCL2/MIR199A2/MEF2C/FHL2/FLII/PDGFRB/DYSF/ANKRD1/TMOD1/CASQ1/MYORG                                                                                                                                                            |
| Biological Process | GO:0051251 | positive regulation of lymphocyte activation        | 58/2279 | 357/18866 | 0.0113476 | 0.1975092 | 0.1787133 | 58 | HLA-DMB/PRKCZ/RHOH/LCK/MYB/RUNX1/SIRPB1/CD55/INPP5D/NLRP3/PIK3R1/ITPKB/CCR2/PIK3R6/CCL5/GRAP2/NCK2/NFATC2/TNFSF13B/TLR9/IGHV6-1/ZBTB16/TGFBR2/HLA-F/PTPN6/ZMIZ1/DOCK8/ZBTB7B/TGFB1/RARA/LILRB4/CCDC88B/PTPRC/CD320/CSK/BCL10/SPTA1/ZNF335/PNP/NOD2/BCL2/TP53BP1/MEF2C/SIRPG/HLX/RUNX3/TNFSF13/CYLD/AP3D1/SLC7A1/FADD/PELI1/PCID2/PAXIP1/VAV3/CYRIB/VSIR/NSD2 |
| Biological Process | GO:0014074 | response to purine-containing compound              | 28/2279 | 149/18866 | 0.011351  | 0.1975092 | 0.1787133 | 28 | TRPM2/BSG/SSH1/KCNE1/PPARG/CASQ2/ITPR2/RAP1B/SLC8A1/APP/P2RY6/FDX1/CRHBP/RAPGEF2/DGKQ/AQP1/AGXT/KCNQ1/PER1/P2RX1/HMGCS1/SREBF1/P2RX5/RELA/EZR/DHODH/AQP9/PRKAA1                                                                                                                                                                                              |
| Biological Process | GO:0045124 | regulation of bone resorption                       | 11/2279 | 43/18866  | 0.0113712 | 0.1975092 | 0.1787133 | 11 | DEF8/INPP5D/PRKCA/UBASH3B/TNFAIP3/CSF1R/NF1/ITGB3/TMEM64/CSK/PLEKHM1                                                                                                                                                                                                                                                                                         |
| Biological Process | GO:0009135 | purine nucleoside diphosphate metabolic process     | 26/2279 | 136/18866 | 0.0115498 | 0.1998808 | 0.1808592 | 26 | FOXK1/HDAC4/PRKAG2/AMPD3/ENO1/HK1/TJP2/PFKFB4/RAE1/CBFA2T3/DHTKD1/APP/OGDH/ADPGK/PGAM1/NUP93/ENO3/HK2/SEC13/GUK1/ESRRB/PKM/AK2/AK5/PFKFB3/PRKAA1                                                                                                                                                                                                             |
| Biological Process | GO:0009179 | purine ribonucleoside diphosphate metabolic process | 26/2279 | 136/18866 | 0.0115498 | 0.1998808 | 0.1808592 | 26 | FOXK1/HDAC4/PRKAG2/AMPD3/ENO1/HK1/TJP2/PFKFB4/RAE1/CBFA2T3/DHTKD1/APP/OGDH/ADPGK/PGAM1/NUP93/ENO3/HK2/SEC13/GUK1/ESRRB/PKM/AK2/AK5/PFKFB3/PRKAA1                                                                                                                                                                                                             |

|                    |            |                                                                                                                 |         |           |           |           |           |    |                                                                                                                                                                                                                                                                   |
|--------------------|------------|-----------------------------------------------------------------------------------------------------------------|---------|-----------|-----------|-----------|-----------|----|-------------------------------------------------------------------------------------------------------------------------------------------------------------------------------------------------------------------------------------------------------------------|
| Biological Process | GO:0006978 | DNA damage response, signal transduction by p53 class mediator resulting in transcription of p21 class mediator | 6/2279  | 17/18866  | 0.0117074 | 0.2011437 | 0.1820019 | 6  | BRCA2/HIPK2/ZNF385A/SP100/FOXO1/CHEK2                                                                                                                                                                                                                             |
| Biological Process | GO:0030033 | microvillus assembly                                                                                            | 6/2279  | 17/18866  | 0.0117074 | 0.2011437 | 0.1820019 | 6  | PLD1/TNFR1/ATP8B1/RAPGEF2/ESP1/EZR                                                                                                                                                                                                                                |
| Biological Process | GO:0035855 | megakaryocyte development                                                                                       | 6/2279  | 17/18866  | 0.0117074 | 0.2011437 | 0.1820019 | 6  | ZFPM1/FLI1/PIP4K2A/PTPN6/ZNF385A/MEIS1                                                                                                                                                                                                                            |
| Biological Process | GO:0070293 | renal absorption                                                                                                | 6/2279  | 17/18866  | 0.0117074 | 0.2011437 | 0.1820019 | 6  | GSN/SGK1/HNF1A/HBB/KCNQ1/AQP3                                                                                                                                                                                                                                     |
| Biological Process | GO:0010594 | regulation of endothelial cell migration                                                                        | 41/2279 | 238/18866 | 0.0119614 | 0.2034952 | 0.1841296 | 41 | FOXP1/CALR/NRP2/PPARG/MAP3K3/MIR143/RIN2/HDAC7/ANGPT1/ITGB1BP1/PRKCA/MIR199A1/GPLD1/TNF/MIR101-2/SEMA4A/STAT5A/JUP/THBS1/AKT3/MIR24-2/MIR27A/MIR23A/FGFR1/TGFB1/ZNF580/NF1/BMPER/ITGB3/GRN/PDGFB/ETS1/NFE2L2/VASH1/MIR199A2/NOTCH1/MEF2C/SP100/PLCG1/ADGRA2/PLPP3 |
| Biological Process | GO:0006735 | NADH regeneration                                                                                               | 8/2279  | 27/18866  | 0.0119785 | 0.2034952 | 0.1841296 | 8  | FOXK1/ENO1/HK1/ADPGK/PGAM1/ENO3/HK2/PKM                                                                                                                                                                                                                           |
| Biological Process | GO:0035459 | vesicle cargo loading                                                                                           | 8/2279  | 27/18866  | 0.0119785 | 0.2034952 | 0.1841296 | 8  | KIF13A/SEC23B/MIA3/SEC13/SEC24C/TMED2/SEC31A/MIA2                                                                                                                                                                                                                 |
| Biological Process | GO:0061621 | canonical glycolysis                                                                                            | 8/2279  | 27/18866  | 0.0119785 | 0.2034952 | 0.1841296 | 8  | FOXK1/ENO1/HK1/ADPGK/PGAM1/ENO3/HK2/PKM                                                                                                                                                                                                                           |
| Biological Process | GO:0061718 | glucose catabolic process to pyruvate                                                                           | 8/2279  | 27/18866  | 0.0119785 | 0.2034952 | 0.1841296 | 8  | FOXK1/ENO1/HK1/ADPGK/PGAM1/ENO3/HK2/PKM                                                                                                                                                                                                                           |

|                    |            |                                                                |         |           |           |           |           |    |                                                                                                                                                                                                                     |
|--------------------|------------|----------------------------------------------------------------|---------|-----------|-----------|-----------|-----------|----|---------------------------------------------------------------------------------------------------------------------------------------------------------------------------------------------------------------------|
| Biological Process | GO:0099590 | neurotransmitter receptor internalization                      | 8/2279  | 27/18866  | 0.0119785 | 0.2034952 | 0.1841296 | 8  | DNM2/NUMB/ITGB3/GSG1L/DNM1/DNM3/EPS15/MX1                                                                                                                                                                           |
| Biological Process | GO:0047496 | vesicle transport along microtubule                            | 12/2279 | 49/18866  | 0.0119942 | 0.2034952 | 0.1841296 | 12 | PRKCZ/NDE1/KIF13A/DYNC1H1/CNIH2/HTT/KIF1B/KIFAP3/AP3D1/FBXW11/NDEL1/DTNBP1                                                                                                                                          |
| Biological Process | GO:0000422 | autophagy of mitochondrion                                     | 17/2279 | 79/18866  | 0.0121686 | 0.2049888 | 0.1854811 | 17 | VPS13D/CTTN/FBXO7/WIPI2/CAMKK2/USP36/SMURF1/CLEC16A/HTT/ATG14/HK2/FIS1/DNM1L/TSC2/SREBF1/MARK2/PRKN                                                                                                                 |
| Biological Process | GO:0016575 | histone deacetylation                                          | 17/2279 | 79/18866  | 0.0121686 | 0.2049888 | 0.1854811 | 17 | HDAC4/HDAC7/SIN3B/SKI/C6orf89/HDAC1/SPHK2/ZBTB7B/PHB/MTA1/CTBP1/MTA2/PER2/PER1/SREBF1/ELK4/SIRT3                                                                                                                    |
| Biological Process | GO:0043536 | positive regulation of blood vessel endothelial cell migration | 17/2279 | 79/18866  | 0.0121686 | 0.2049888 | 0.1854811 | 17 | MAP3K3/MIR143/HDAC7/ANGPT1/PRKCA/MIR101-2/STAT5A/THBS1/AKT3/MIR27A/MIR23A/FGFR1/TGFB1/PDGFB/ETS1/NFE2L2/PLCG1                                                                                                       |
| Biological Process | GO:0061726 | mitochondrion disassembly                                      | 17/2279 | 79/18866  | 0.0121686 | 0.2049888 | 0.1854811 | 17 | VPS13D/CTTN/FBXO7/WIPI2/CAMKK2/USP36/SMURF1/CLEC16A/HTT/ATG14/HK2/FIS1/DNM1L/TSC2/SREBF1/MARK2/PRKN                                                                                                                 |
| Biological Process | GO:0051216 | cartilage development                                          | 35/2279 | 197/18866 | 0.0122071 | 0.2051159 | 0.1855961 | 35 | CSGALNACT1/MEF2D/CHI3L1/RUNX1/CHSY1/SMAD3/TGFBI/GPLD1/ANXA6/CHST11/ZBTB16/TGFBR2/SMAD7/POC1A/WNT11/FGFR1/PAX7/TGFB1/RARA/POR/GHRL/RARG/BMP1B/WNT5B/RUNX2/CREB3L2/TRPS1/MEF2C/NPPC/RUNX3/GDF6/RELA/ZNF219/RFLNA/CCN4 |
| Biological Process | GO:0036344 | platelet morphogenesis                                         | 7/2279  | 22/18866  | 0.0122409 | 0.2051159 | 0.1855961 | 7  | ZFPM1/MYH9/ACTN1/PTPN6/ZNF385A/WDR1/MEF2C                                                                                                                                                                           |
| Biological Process | GO:0062033 | positive regulation of mitotic sister chromatid segregation    | 7/2279  | 22/18866  | 0.0122409 | 0.2051159 | 0.1855961 | 7  | NSMCE2/CUL3/CDC16/NUMA1/RB1/ANAPC7/SLF1                                                                                                                                                                             |

|                    |            |                                                                    |         |           |           |           |           |    |                                                                                                                                                                                                                                                                                                                                        |
|--------------------|------------|--------------------------------------------------------------------|---------|-----------|-----------|-----------|-----------|----|----------------------------------------------------------------------------------------------------------------------------------------------------------------------------------------------------------------------------------------------------------------------------------------------------------------------------------------|
| Biological Process | GO:0060350 | endochondral bone morphogenesis                                    | 13/2279 | 55/18866  | 0.0123562 | 0.2059281 | 0.1863311 | 13 | CSGALNACT1/MEF2D/ANXA6/TGFBR2/ALPL/POC1A/RARA/POR/RARG/BMPR1B/RUNX2/MEF2C/NPPC                                                                                                                                                                                                                                                         |
| Biological Process | GO:0035148 | tube formation                                                     | 28/2279 | 150/18866 | 0.0123926 | 0.2059281 | 0.1863311 | 28 | SHROOM3/SKI/ITGB1BP1/SETD2/SPINT2/MTHFD1L/SUFU/ZEB2/MIB1/PAX2/TGFBR1/RARA/PFN1/RARG/STK3/GRHL2/BCL10/SDCCAG8/MTHFD1/RALA/YWHAZ/NOTCH1/TMED2/TSC2/TEAD2/LMO4/NODAL/BRD2                                                                                                                                                                 |
| Biological Process | GO:0009895 | negative regulation of catabolic process                           | 53/2279 | 323/18866 | 0.0124613 | 0.2059281 | 0.1863311 | 53 | TRIM39/FOXK1/HDAC4/TIMP2/SORL1/IL10/MFSD2A/SLC11A1/PAM16/SF3B3/BMF/SMAD3/MIR199A1/GPLD1/SUFU/TNF/HIPK2/CBFA2T3/UBAC2/LARP1/MGAT3/PKP1/USP36/SNX3/DERL2/FEZ2/ZDHHC7/CRTC3/PHB/CLEC16A/ACACB/PSMF1/TBC1D14/NPC1/NBAS/BCL2/MIR199A2/MAP1A/PAIP1/TSC2/DYSF/PDE3B/SECISBP2/RELA/SYNERIP/BAG5/EIF4G1/SVIP/BSCL2/PRKAA1/TENT5C/TENT5A/MARCHF7 |
| Biological Process | GO:0030316 | osteoclast differentiation                                         | 20/2279 | 98/18866  | 0.012485  | 0.2059281 | 0.1863311 | 20 | FOXP1/SBNO2/CREB1/INPP5D/PIK3R1/GAB2/TNF/UBASH3B/CSF1R/TMEM178A/LILRB4/NF1/LRRK1/TMEM64/LRRC17/OSTM1/LTF/CEBPB/FAM20C/CCN4                                                                                                                                                                                                             |
| Biological Process | GO:0030239 | myofibril assembly                                                 | 15/2279 | 67/18866  | 0.0125106 | 0.2059281 | 0.1863311 | 15 | TTN/CASQ2/MYH11/AKAP13/TNNT3/SYNPO2L/TMOD3/ACTG1/WDR1/MEF2C/FLII/PDGFRB/ANKRD1/TMOD1/CASQ1                                                                                                                                                                                                                                             |
| Biological Process | GO:0046847 | filopodium assembly                                                | 14/2279 | 61/18866  | 0.012513  | 0.2059281 | 0.1863311 | 14 | TRPM2/FGD4/ZMYND8/FGD5/SPATA13/ARAP1/WASL/ESPN/PALM/RALA/DNM3/S1PR2/PPP1R16B/EZR                                                                                                                                                                                                                                                       |
| Biological Process | GO:0046596 | regulation of viral entry into host cell                           | 10/2279 | 38/18866  | 0.0126477 | 0.2059281 | 0.1863311 | 10 | TRIM27/P4HB/TRIM38/GSN/TRIM8/TRIM10/SNX3/FCN1/TRIM5/TRIM26                                                                                                                                                                                                                                                                             |
| Biological Process | GO:1900026 | positive regulation of substrate adhesion-dependent cell spreading | 10/2279 | 38/18866  | 0.0126477 | 0.2059281 | 0.1863311 | 10 | P4HB/RREB1/CALR/DOCK1/ARHGEF7/DNM2/PREX1/OLFM4/CASS4/MYADM                                                                                                                                                                                                                                                                             |
| Biological Process | GO:1903900 | regulation of viral life cycle                                     | 29/2279 | 157/18866 | 0.0127508 | 0.2059281 | 0.1863311 | 29 | SLPI/TRIM27/P4HB/TRIM38/GSN/TRIM8/TRIM10/SRPK2/TNF/CCL5/LARP1/SNX3/PC/PHB/FCN1/TRIM5/TNIP1/BCL2/NOTCH1/LTF/ILF3/MX1/NR5A2/PARP10/BANF1/ISG20/TRIM26/P<br>RKN/SHFL                                                                                                                                                                      |



|                    |            |                                                                 |         |           |           |           |           |    |                                                                                                                                                                                                                                                                                                                                                                                                                                                 |
|--------------------|------------|-----------------------------------------------------------------|---------|-----------|-----------|-----------|-----------|----|-------------------------------------------------------------------------------------------------------------------------------------------------------------------------------------------------------------------------------------------------------------------------------------------------------------------------------------------------------------------------------------------------------------------------------------------------|
| Biological Process | GO:0032652 | regulation of interleukin-1 production                          | 22/2279 | 111/18866 | 0.0127652 | 0.2059281 | 0.1863311 | 22 | AZU1/NLRC4/FOXP1/IL10/AIM2/IL16/NLRP3/SMAD3/MEFV/TNF/TNFAIP3/MIR101-2/MNDA/APP/GHRL/ARRB2/NOD2/F2R/CASP1/CD33/CX3CR1/STMP1                                                                                                                                                                                                                                                                                                                      |
| Biological Process | GO:0046031 | ADP metabolic process                                           | 24/2279 | 124/18866 | 0.0128034 | 0.2059281 | 0.1863311 | 24 | FOXK1/HDAC4/PRKAG2/AMPD3/ENO1/HK1/PFKFB4/RAE1/CBFA2T3/DHTKD1/APP/OGDH/ADPGK/PGAM1/NUP93/ENO3/HK2/SEC13/ESRRB/PKM/AK2/AK5/PFKFB3/PRKAA1                                                                                                                                                                                                                                                                                                          |
| Biological Process | GO:0071902 | positive regulation of protein serine/threonine kinase activity | 56/2279 | 345/18866 | 0.0128923 | 0.2059281 | 0.1863311 | 56 | ELANE/KSR1/RPTOR/TGFA/ACSL1/MAP3K3/MAP2K6/AKAP13/ERN1/PIK3R6/ARRB1/TNF/ZEB2/TRAF2/CSF1R/FPR1/TLR9/TNIK/THBS1/PIK3R5/RIPK1/ILK/FLT1/FGFR1/TGFB1/RAPGEF2/PDGF/D/UBE2V1/MUC20/CXCL17/GHRL/PTPRC/CAB39/CSK/STK3/PDE6H/PDGFB/MAP3K14/TAOK3/IRAK2/NTRK1/NOD2/S1PR2/PIH1D1/F2R/PDGFC/LTF/MAPKAPK3/PDGFRB/GADD45G/CCNY/CCNYL1/DBNL/DAZAP2/PRKAA1/MAP3K20                                                                                                |
| Biological Process | GO:0002791 | regulation of peptide secretion                                 | 61/2279 | 381/18866 | 0.0129657 | 0.2059281 | 0.1863311 | 61 | S100A8/SORL1/NADK/IL10/TTN/C1QTNF3/ITPR2/MYRIP/CLEC9A/CACNA1C/LRP5L/RAB11FIP1/FRMD4A/ARRB1/PRKCA/MIR199A1/GPLD1/FGR/TNF/TRAF2/MYO18A/CCL5/ABCG1/GJA5/RHBDF2/TLR9/CLEC5A/ITSN1/ITPR1/RFX3/TCF7L2/TGFB1/CRHBP/ENY2/GIPR/BLK/NR1H2/GHRL/KLF7/ARNTL/MYOM1/PER2/SLC16A1/MIR199A2/DNM1L/PRKCE/F2R/SLC2A1/ANKRD1/SREBF1/ADTRP/CADM1/CPT1A/CD33/RPH3AL/EZR/C2CD2L/SIRT3/PRKN/P3H1/CCN4                                                                  |
| Biological Process | GO:0045765 | regulation of angiogenesis                                      | 64/2279 | 403/18866 | 0.0131965 | 0.2059281 | 0.1863311 | 64 | LRG1/RNH1/IL10/PPARG/C3AR1/MAP3K3/MIR143/MIR145/CHI3L1/HDAC7/RUNX1/ITGB1BP1/CCR2/PIK3R6/PRKCA/COL4A2/MIR199A1/TNF/TNFAIP3/MIR101-2/AGO1/HIPK2/SEMA4A/JUP/TGFBR2/THBS1/CTSH/DLL1/AKT3/MIR24-2/MIR27A/MIR23A/FLT1/JAK1/AGO2/EPN2/PRKCB/AQP1/NF1/BMPER/HK2/GHRL/GRN/ETS1/NFE2L2/ENG/ITGB2/VASH1/MIR138-2/PKM/MIR199A2/NOTCH1/SP100/GPR4/AGTR1/PPP1R16B/HHEX/TNFSF12/PDE3B/PLCG1/NODAL/CX3CR1/CEMIP2/ADGRA2                                         |
| Biological Process | GO:0016331 | morphogenesis of embryonic epithelium                           | 28/2279 | 151/18866 | 0.01351   | 0.2059281 | 0.1863311 | 28 | SHROOM3/SKI/SETD2/SPINT2/MTHFD1L/SUFU/ZEB2/MIB1/PAX2/TGFB1/RDH10/RARA/PFN1/TGFB11/RARG/STK3/GRHL2/BCL10/MTHFD1/RALA/TMED2/TSC2/TEAD2/ALDH1A2/LMO4/NODAL/GRSF1/BRD2                                                                                                                                                                                                                                                                              |
| Biological Process | GO:0060249 | anatomical structure homeostasis                                | 73/2279 | 469/18866 | 0.0135441 | 0.2059281 | 0.1863311 | 73 | PIWIL4/BLM/DCTN1/DEF8/MFSD2A/TNKS/POLE/TJP2/LPCAT1/BRCA2/INPP5D/ANGPT1/HMBOX1/CRB1/CCR2/ANKRD11/PRKCA/RTEL1/HUS1/UBASH3B/TNFAIP3/NSMCE2/CDH23/CSF1R/SFTPD/TLR9/YLPM1/ATP2B2/POLA2/CTSH/MBP/CCDC66/MTF1/CDH3/NF1/LRRK1/JAM3/WWTR1/ITGB3/ACTG1/SMARCA1/TMEM64/CSK/SMG6/SLC22A5/PLEKHM1/ESRRB/ADD1/NOD2/RB1/BCL2/NOTCH1/ACACA/MAP1A/GCNT2/P2RX1/CDHR1/EPAS1/SP100/F2R/LTF/PDGFRB/SLC2A1/ERCC1/TYRO3/SLX4/POLD3/CCT6A/POLE4/NPHP4/PRKAA1/TFIP1/PRKN |
| Biological Process | GO:0050654 | chondroitin sulfate proteoglycan metabolic process              | 11/2279 | 44/18866  | 0.0135478 | 0.2059281 | 0.1863311 | 11 | CSGALNACT1/SPOCK2/DSE/HEXB/CHSY1/CHST11/CHST15/EGFLAM/XYLT1/ARSB/PXYLP1                                                                                                                                                                                                                                                                                                                                                                         |
| Biological Process | GO:0070302 | regulation of stress-activated protein kinase signaling cascade | 41/2279 | 240/18866 | 0.013687  | 0.2059281 | 0.1863311 | 41 | MAP3K3/HIPK3/ERN1/ZNF622/TNF/ZEB2/TRAF2/TRAF1/PHLPP1/HIPK2/TLR9/DUSP22/TNIK/RIPK1/APP/IGF1R/MTURN/SCIMP/AXIN1/COP5/SH3RF3/STK3/PLCB1/MAPK8IP2/TAOK3/MIR138-2/NOD2/PER1/DUSP3/FOXO1/FOXO1/GADD45G/GDF6/CYLD/ANKRD6/EZR/DTNBP1/MECOM/DBNL/PRKN/MAP3K20                                                                                                                                                                                            |

|                    |            |                                                |         |           |           |           |           |    |                                                                                                                                                                                                                                                                                                                                                                                                |
|--------------------|------------|------------------------------------------------|---------|-----------|-----------|-----------|-----------|----|------------------------------------------------------------------------------------------------------------------------------------------------------------------------------------------------------------------------------------------------------------------------------------------------------------------------------------------------------------------------------------------------|
| Biological Process | GO:0019318 | hexose metabolic process                       | 43/2279 | 254/18866 | 0.0137201 | 0.2059281 | 0.1863311 | 43 | MAEA/FUT4/FOXK1/ENO1/FUT7/HK1/C1QTNF3/PFKFB4/GLPD1/TNF/PGP/CHST15/ADPGK/PGAM1/GLYCTK/PC/NISCH/DGKQ/ENO3/DYRK2/HK2/GHRL/GNB3/ACACB/PPP1CB/PMM2/ESRRB/PER2/PKM/PCK2/FOXO1/NCOA2/MAN2C1/SOGA1/KBTBD2/WBTC1/CPT1A/PFKFB3/SLC25A1/PRKAA1/PRKN/SDHAF3/RUBCNL                                                                                                                                         |
| Biological Process | GO:0034331 | cell junction maintenance                      | 9/2279  | 33/18866  | 0.0139091 | 0.2059281 | 0.1863311 | 9  | PRTN3/DCTN1/CD177/CSF1R/SYNGAP1/PLEKHA7/CTBP2/F2R/KIFC3                                                                                                                                                                                                                                                                                                                                        |
| Biological Process | GO:0048384 | retinoic acid receptor signaling pathway       | 9/2279  | 33/18866  | 0.0139091 | 0.2059281 | 0.1863311 | 9  | RXRA/CALR/PPARG/ACTN4/RARA/NR1H2/CTBP2/RARG/ALDH1A2                                                                                                                                                                                                                                                                                                                                            |
| Biological Process | GO:0070371 | ERK1 and ERK2 cascade                          | 53/2279 | 325/18866 | 0.0139687 | 0.2059281 | 0.1863311 | 53 | PRKCZ/SPRED2/MIR145/CHI3L1/ANGPT1/ITGB1BP1/RAP1B/ARRB1/PRKCA/TNF/CCL5/CSF1R/FPR2/CTSH/C5AR2/GNAI2/APP/PTPN6/MIR24-2/MIR27A/MIR23A/MTURN/SCIMP/P2RY6/TGFB1/PHB/MARCO/RAPGEF2/PDGFD/BMPER/CCL20/TNIP1/PTPRC/CSK/PDGFB/ARRB2/YWHAZ/NTRK1/NOD2/NOTCH1/GCNT2/DUSP3/F2R/PDGFC/PDGFRB/ARHGAP8/EZR/NODAL/CCL22/LIF/NDRG2/SIRT3/DENND2B                                                                 |
| Biological Process | GO:0042176 | regulation of protein catabolic process        | 63/2279 | 397/18866 | 0.0140534 | 0.2059281 | 0.1863311 | 63 | TRIM39/RNF144A/TIMP2/SORL1/FZR1/IL10/RNF19A/STX5/WWP2/CSNK1D/LPCAT1/TNFRSF1B/SF3B3/SMAD3/GLPD1/SUFU/TNF/TNFAIP3/HIPK2/VGLL4/CBFA2T3/UBAC2/MGAT3/ODC1/DISC1/EDEM1/SNX3/ZDHHC2/DERL2/CLU/SMAD7/PLEKHG5/PHB/SMURF1/AXIN1/CLEC16A/EDEM2/CSNK1E/PSMF1/GFAP/NFE2L2/ARNTL/CDH1/RNF144B/MAP1A/GNA12/UBXN2A/UBE3A/CHEK2/NEDD4/RNF14/FOXO1/DYSF/TRIB1/TNFSF12/HECW2/RELA/EZR/RNF40/BAG5/SVIP/PRKN/MARCH7 |
| Biological Process | GO:0048199 | vesicle targeting, to, from or within Golgi    | 16/2279 | 74/18866  | 0.0140795 | 0.2059281 | 0.1863311 | 16 | CTSZ/SERPINA1/TGFA/STX5/CSNK1D/TRAPPC10/CUL3/TRAPPC9/CNIH2/CD59/SEC13/ANKRD28/SEC24C/TMED2/SEC31A/TRAPPC2                                                                                                                                                                                                                                                                                      |
| Biological Process | GO:0001838 | embryonic epithelial tube formation            | 24/2279 | 125/18866 | 0.0140828 | 0.2059281 | 0.1863311 | 24 | SHROOM3/SKI/SETD2/SPINT2/MTHFD1L/SUFU/ZEB2/MIB1/PAX2/TGFB1/RARA/PFN1/RARG/STK3/GRHL2/BCL10/MTHFD1/RALA/TMED2/TSC2/TEAD2/LMO4/NODAL/BRD2                                                                                                                                                                                                                                                        |
| Biological Process | GO:0001767 | establishment of lymphocyte polarity           | 5/2279  | 13/18866  | 0.0142826 | 0.2059281 | 0.1863311 | 5  | GSN/SNX27/MYH9/DOCK8/DOCK2                                                                                                                                                                                                                                                                                                                                                                     |
| Biological Process | GO:0002430 | complement receptor mediated signaling pathway | 5/2279  | 13/18866  | 0.0142826 | 0.2059281 | 0.1863311 | 5  | C3AR1/GLPD1/FPR2/FPR1/CSAR2                                                                                                                                                                                                                                                                                                                                                                    |

|                    |            |                                                                     |        |          |           |           |           |   |                                     |
|--------------------|------------|---------------------------------------------------------------------|--------|----------|-----------|-----------|-----------|---|-------------------------------------|
| Biological Process | GO:0009650 | UV protection                                                       | 5/2279 | 13/18866 | 0.0142826 | 0.2059281 | 0.1863311 | 5 | MFAP4/CAT/ERCC1/XPA/ERCC2           |
| Biological Process | GO:0010745 | negative regulation of macrophage derived foam cell differentiation | 5/2279 | 13/18866 | 0.0142826 | 0.2059281 | 0.1863311 | 5 | PPARG/ABCG1/NR1H2/ITGB3/ABCA1       |
| Biological Process | GO:0030656 | regulation of vitamin metabolic process                             | 5/2279 | 13/18866 | 0.0142826 | 0.2059281 | 0.1863311 | 5 | GFI1/VDR/TNF/RDH10/CD320            |
| Biological Process | GO:0045842 | positive regulation of mitotic metaphase/anaphase transition        | 5/2279 | 13/18866 | 0.0142826 | 0.2059281 | 0.1863311 | 5 | NSMCE2/CUL3/CDC16/RB1/ANAPC7        |
| Biological Process | GO:0048096 | chromatin-mediated maintenance of transcription                     | 5/2279 | 13/18866 | 0.0142826 | 0.2059281 | 0.1863311 | 5 | SERTAD2/PADI2/ZMIZ1/ARID1B/SMARCD1  |
| Biological Process | GO:0048505 | regulation of timing of cell differentiation                        | 5/2279 | 13/18866 | 0.0142826 | 0.2059281 | 0.1863311 | 5 | DLL1/RBPJ/NOTCH1/NODAL/HES3         |
| Biological Process | GO:0099566 | regulation of postsynaptic cytosolic calcium ion concentration      | 5/2279 | 13/18866 | 0.0142826 | 0.2059281 | 0.1863311 | 5 | SLC8A1/ATP2B2/ITPR1/MYO5A/SYNPO     |
| Biological Process | GO:1900025 | negative regulation of substrate adhesion-dependent cell spreading  | 5/2279 | 13/18866 | 0.0142826 | 0.2059281 | 0.1863311 | 5 | TACSTD2/KANK1/ITGB1BP1/ACTN4/CORO1C |
| Biological Process | GO:1901970 | positive regulation of mitotic sister chromatid separation          | 5/2279 | 13/18866 | 0.0142826 | 0.2059281 | 0.1863311 | 5 | NSMCE2/CUL3/CDC16/RB1/ANAPC7        |

|                    |            |                                                     |         |           |           |           |           |    |                                                                                                                                                                                                                                                                                                      |
|--------------------|------------|-----------------------------------------------------|---------|-----------|-----------|-----------|-----------|----|------------------------------------------------------------------------------------------------------------------------------------------------------------------------------------------------------------------------------------------------------------------------------------------------------|
| Biological Process | GO:1905666 | regulation of protein localization to endosome      | 5/2279  | 13/18866  | 0.0142826 | 0.2059281 | 0.1863311 | 5  | SORL1/MGAT3/ANKRD13A/ZDHHC1/EZR                                                                                                                                                                                                                                                                      |
| Biological Process | GO:0030888 | regulation of B cell proliferation                  | 14/2279 | 62/18866  | 0.0144145 | 0.2059281 | 0.1863311 | 14 | IL10/INPP5D/NFATC2/TNFSF13B/TLR9/MNDA/TNFRSF21/BLK/PTPRC/CD320/BCL2/MEF2C/PELI1/VAV3                                                                                                                                                                                                                 |
| Biological Process | GO:0050714 | positive regulation of protein secretion            | 31/2279 | 172/18866 | 0.0144581 | 0.2059281 | 0.1863311 | 31 | SORL1/NADK/IL10/TTN/C1QTNF3/MYRIP/CLEC9A/FRMD4A/ARRB1/GPLD1/FGR/TNF/MYO18A/ABCG1/CLEC5A/TCF7L2/TGFB1/GIPR/BLK/NR1H2/GHRL/MYOM1/DNM1L/PRKCE/ANKRD1/CADM1/CD33/RPH3AL/EZR/C2CD2L/SIRT3                                                                                                                 |
| Biological Process | GO:0032868 | response to insulin                                 | 47/2279 | 283/18866 | 0.0144814 | 0.2059281 | 0.1863311 | 47 | PRKCZ/SORL1/FUT7/IL10/PPARG/KANK1/PTPRE/PIK3R1/GPLD1/RAB31/BAIAP2L1/BAIAP2/GRB10/GNAI2/ATP6V1B2/ZDHHC7/IGF1R/ZBTB7B/FER/PRKCB/MYO5A/CAT/PRKCI/SORT1/INSRR/PKM/ATP6V0B/BCAR3/PCK2/MYO1C/TSC2/SLC2A1/FOXO1/SOGA1/SREBF1/KBTBD2/PDE3B/CYFIP1/RELA/WDC1/NDEL1/LPIN1/HSD11B2/PRKAA1/MARS1/ATP6V0C/ATP6V1C |
| Biological Process | GO:0020285 | inhibition of neuroepithelial cell differentiation  | 3/2279  | 5/18866   | 0.0145742 | 0.2059281 | 0.1863311 | 3  | DLL1/NOTCH1/NODAL                                                                                                                                                                                                                                                                                    |
| Biological Process | GO:0003415 | chondrocyte hypertrophy                             | 3/2279  | 5/18866   | 0.0145742 | 0.2059281 | 0.1863311 | 3  | TGFB2/SMAD7/RARG                                                                                                                                                                                                                                                                                     |
| Biological Process | GO:0003431 | growth plate cartilage chondrocyte development      | 3/2279  | 5/18866   | 0.0145742 | 0.2059281 | 0.1863311 | 3  | TGFB2/POC1A/RARG                                                                                                                                                                                                                                                                                     |
| Biological Process | GO:0010891 | negative regulation of sequestering of triglyceride | 3/2279  | 5/18866   | 0.0145742 | 0.2059281 | 0.1863311 | 3  | PNPLA2/PPARG/ABHD5                                                                                                                                                                                                                                                                                   |
| Biological Process | GO:0014004 | microglia differentiation                           | 3/2279  | 5/18866   | 0.0145742 | 0.2059281 | 0.1863311 | 3  | APP/TGFB1/TSPAN2                                                                                                                                                                                                                                                                                     |

|                    |            |                                                          |        |         |           |           |           |   |                     |
|--------------------|------------|----------------------------------------------------------|--------|---------|-----------|-----------|-----------|---|---------------------|
| Biological Process | GO:0031033 | myosin filament organization                             | 3/2279 | 5/18866 | 0.0145742 | 0.2059281 | 0.1863311 | 3 | TTN/MYH11/DAPK3     |
| Biological Process | GO:0048298 | positive regulation of isotype switching to IgA isotypes | 3/2279 | 5/18866 | 0.0145742 | 0.2059281 | 0.1863311 | 3 | TGFB1/TNFSF13/NSD2  |
| Biological Process | GO:0048625 | myoblast fate commitment                                 | 3/2279 | 5/18866 | 0.0145742 | 0.2059281 | 0.1863311 | 3 | TCF7L2/IFRD1/EPAS1  |
| Biological Process | GO:0060414 | aorta smooth muscle tissue morphogenesis                 | 3/2279 | 5/18866 | 0.0145742 | 0.2059281 | 0.1863311 | 3 | MIR143/MIR145/MYLK  |
| Biological Process | GO:0070345 | negative regulation of fat cell proliferation            | 3/2279 | 5/18866 | 0.0145742 | 0.2059281 | 0.1863311 | 3 | TFDP1/E2F3/PER2     |
| Biological Process | GO:0072144 | glomerular mesangial cell development                    | 3/2279 | 5/18866 | 0.0145742 | 0.2059281 | 0.1863311 | 3 | PDGFB/NOTCH1/GPR4   |
| Biological Process | GO:1905832 | positive regulation of spindle assembly                  | 3/2279 | 5/18866 | 0.0145742 | 0.2059281 | 0.1863311 | 3 | DYNC1H1/NUMA1/SPAG5 |
| Biological Process | GO:2000370 | positive regulation of clathrin-dependent endocytosis    | 3/2279 | 5/18866 | 0.0145742 | 0.2059281 | 0.1863311 | 3 | DNM2/WASL/DGKD      |
| Biological Process | GO:2000407 | regulation of T cell extravasation                       | 3/2279 | 5/18866 | 0.0145742 | 0.2059281 | 0.1863311 | 3 | CCR2/RIPK3/FADD     |

|                    |            |                                                                               |        |         |           |           |           |   |                |
|--------------------|------------|-------------------------------------------------------------------------------|--------|---------|-----------|-----------|-----------|---|----------------|
| Biological Process | GO:0000117 | regulation of transcription involved in G2/M transition of mitotic cell cycle | 2/2279 | 2/18866 | 0.0145868 | 0.2059281 | 0.1863311 | 2 | ESRRB/BACH1    |
| Biological Process | GO:0001831 | trophectodermal cellular morphogenesis                                        | 2/2279 | 2/18866 | 0.0145868 | 0.2059281 | 0.1863311 | 2 | CUL3/NODAL     |
| Biological Process | GO:0002728 | negative regulation of natural killer cell cytokine production                | 2/2279 | 2/18866 | 0.0145868 | 0.2059281 | 0.1863311 | 2 | HLA-F/CD96     |
| Biological Process | GO:0006083 | acetate metabolic process                                                     | 2/2279 | 2/18866 | 0.0145868 | 0.2059281 | 0.1863311 | 2 | ACSS1/ACSS2    |
| Biological Process | GO:0006668 | sphinganine-1-phosphate metabolic process                                     | 2/2279 | 2/18866 | 0.0145868 | 0.2059281 | 0.1863311 | 2 | SPHK2/SGPP1    |
| Biological Process | GO:0009183 | purine deoxyribonucleoside diphosphate biosynthetic process                   | 2/2279 | 2/18866 | 0.0145868 | 0.2059281 | 0.1863311 | 2 | GUK1/AK5       |
| Biological Process | GO:0009257 | 10-formyltetrahydrofolate biosynthetic process                                | 2/2279 | 2/18866 | 0.0145868 | 0.2059281 | 0.1863311 | 2 | MTHFD1L/MTHFD1 |
| Biological Process | GO:0019413 | acetate biosynthetic process                                                  | 2/2279 | 2/18866 | 0.0145868 | 0.2059281 | 0.1863311 | 2 | ACSS1/ACSS2    |
| Biological Process | GO:0019417 | sulfur oxidation                                                              | 2/2279 | 2/18866 | 0.0145868 | 0.2059281 | 0.1863311 | 2 | MICAL1/MICAL2  |

|                    |            |                                                                            |        |         |           |           |           |   |                 |
|--------------------|------------|----------------------------------------------------------------------------|--------|---------|-----------|-----------|-----------|---|-----------------|
| Biological Process | GO:0019427 | acetyl-CoA biosynthetic process from acetate                               | 2/2279 | 2/18866 | 0.0145868 | 0.2059281 | 0.1863311 | 2 | ACSS1/ACSS2     |
| Biological Process | GO:0019542 | propionate biosynthetic process                                            | 2/2279 | 2/18866 | 0.0145868 | 0.2059281 | 0.1863311 | 2 | ACSS1/ACSS2     |
| Biological Process | GO:0032603 | fractalkine production                                                     | 2/2279 | 2/18866 | 0.0145868 | 0.2059281 | 0.1863311 | 2 | AZU1/TNF        |
| Biological Process | GO:0035408 | histone H3-T6 phosphorylation                                              | 2/2279 | 2/18866 | 0.0145868 | 0.2059281 | 0.1863311 | 2 | PRKCA/PRKCB     |
| Biological Process | GO:0035526 | retrograde transport, plasma membrane to Golgi                             | 2/2279 | 2/18866 | 0.0145868 | 0.2059281 | 0.1863311 | 2 | RAB43/USP6NL    |
| Biological Process | GO:0035674 | tricarboxylic acid transmembrane transport                                 | 2/2279 | 2/18866 | 0.0145868 | 0.2059281 | 0.1863311 | 2 | SLC13A5/SLC25A1 |
| Biological Process | GO:0035698 | CD8-positive, alpha-beta cytotoxic T cell extravasation                    | 2/2279 | 2/18866 | 0.0145868 | 0.2059281 | 0.1863311 | 2 | RIPK3/FADD      |
| Biological Process | GO:0043314 | negative regulation of neutrophil degranulation                            | 2/2279 | 2/18866 | 0.0145868 | 0.2059281 | 0.1863311 | 2 | ABR/BCR         |
| Biological Process | GO:0044663 | establishment or maintenance of cell type involved in phenotypic switching | 2/2279 | 2/18866 | 0.0145868 | 0.2059281 | 0.1863311 | 2 | MIR143/MIR145   |

|                    |            |                                                         |        |         |           |           |           |   |                   |
|--------------------|------------|---------------------------------------------------------|--------|---------|-----------|-----------|-----------|---|-------------------|
| Biological Process | GO:0044855 | plasma membrane raft distribution                       | 2/2279 | 2/18866 | 0.0145868 | 0.2059281 | 0.1863311 | 2 | GSN/PTPRC         |
| Biological Process | GO:0044856 | plasma membrane raft localization                       | 2/2279 | 2/18866 | 0.0145868 | 0.2059281 | 0.1863311 | 2 | GSN/PTPRC         |
| Biological Process | GO:0045659 | negative regulation of neutrophil differentiation       | 2/2279 | 2/18866 | 0.0145868 | 0.2059281 | 0.1863311 | 2 | INPP5D/TRIB1      |
| Biological Process | GO:0045994 | positive regulation of translational initiation by iron | 2/2279 | 2/18866 | 0.0145868 | 0.2059281 | 0.1863311 | 2 | RXRA/TNF          |
| Biological Process | GO:0046778 | modification by virus of host mRNA processing           | 2/2279 | 2/18866 | 0.0145868 | 0.2059281 | 0.1863311 | 2 | PABPN1/CPSF4      |
| Biological Process | GO:0060357 | regulation of leucine import                            | 2/2279 | 2/18866 | 0.0145868 | 0.2059281 | 0.1863311 | 2 | SLC43A2/SLC43A1   |
| Biological Process | GO:0060358 | negative regulation of leucine import                   | 2/2279 | 2/18866 | 0.0145868 | 0.2059281 | 0.1863311 | 2 | SLC43A2/SLC43A1   |
| Biological Process | GO:0060844 | arterial endothelial cell fate commitment               | 2/2279 | 2/18866 | 0.0145868 | 0.2059281 | 0.1863311 | 2 | DLL1/RBPJ         |
| Biological Process | GO:0061766 | positive regulation of lung blood pressure              | 2/2279 | 2/18866 | 0.0145868 | 0.2059281 | 0.1863311 | 2 | MIR199A1/MIR199A2 |



|                    |            |                                                                                                                     |        |         |           |           |           |   |               |
|--------------------|------------|---------------------------------------------------------------------------------------------------------------------|--------|---------|-----------|-----------|-----------|---|---------------|
| Biological Process | GO:0071716 | leukotriene transport                                                                                               | 2/2279 | 2/18866 | 0.0145868 | 0.2059281 | 0.1863311 | 2 | ABCC1/ABCC2   |
| Biological Process | GO:0071846 | actin filament debranching                                                                                          | 2/2279 | 2/18866 | 0.0145868 | 0.2059281 | 0.1863311 | 2 | GMFB/GMFG     |
| Biological Process | GO:0071963 | establishment or maintenance of cell polarity regulating cell shape                                                 | 2/2279 | 2/18866 | 0.0145868 | 0.2059281 | 0.1863311 | 2 | PARVB/MARK2   |
| Biological Process | GO:0090108 | positive regulation of high-density lipoprotein particle assembly                                                   | 2/2279 | 2/18866 | 0.0145868 | 0.2059281 | 0.1863311 | 2 | NR1H2/ABCA1   |
| Biological Process | GO:1900756 | protein processing in phagocytic vesicle                                                                            | 2/2279 | 2/18866 | 0.0145868 | 0.2059281 | 0.1863311 | 2 | GSN/MYH9      |
| Biological Process | GO:1902960 | negative regulation of aspartic-type endopeptidase activity involved in amyloid precursor protein catabolic process | 2/2279 | 2/18866 | 0.0145868 | 0.2059281 | 0.1863311 | 2 | SORL1/BIN1    |
| Biological Process | GO:1902996 | regulation of neurofibrillary tangle assembly                                                                       | 2/2279 | 2/18866 | 0.0145868 | 0.2059281 | 0.1863311 | 2 | SORL1/CLU     |
| Biological Process | GO:1903526 | negative regulation of membrane tubulation                                                                          | 2/2279 | 2/18866 | 0.0145868 | 0.2059281 | 0.1863311 | 2 | DNM2/WASL     |
| Biological Process | GO:1903565 | negative regulation of protein localization to cilium                                                               | 2/2279 | 2/18866 | 0.0145868 | 0.2059281 | 0.1863311 | 2 | LZTFL1/INPP5E |

|                    |            |                                                                                  |        |         |           |           |           |   |                 |
|--------------------|------------|----------------------------------------------------------------------------------|--------|---------|-----------|-----------|-----------|---|-----------------|
| Biological Process | GO:1903921 | regulation of protein processing in phagocytic vesicle                           | 2/2279 | 2/18866 | 0.0145868 | 0.2059281 | 0.1863311 | 2 | GSN/MYH9        |
| Biological Process | GO:1903923 | positive regulation of protein processing in phagocytic vesicle                  | 2/2279 | 2/18866 | 0.0145868 | 0.2059281 | 0.1863311 | 2 | GSN/MYH9        |
| Biological Process | GO:1904017 | cellular response to Thyroglobulin triiodothyronine                              | 2/2279 | 2/18866 | 0.0145868 | 0.2059281 | 0.1863311 | 2 | NCOA1/NCOA2     |
| Biological Process | GO:1904675 | regulation of somatic stem cell division                                         | 2/2279 | 2/18866 | 0.0145868 | 0.2059281 | 0.1863311 | 2 | MIR145/LBH      |
| Biological Process | GO:1904719 | positive regulation of AMPA glutamate receptor clustering                        | 2/2279 | 2/18866 | 0.0145868 | 0.2059281 | 0.1863311 | 2 | SSH1/ZDHHC2     |
| Biological Process | GO:1905424 | regulation of Wnt-mediated midbrain dopaminergic neuron differentiation          | 2/2279 | 2/18866 | 0.0145868 | 0.2059281 | 0.1863311 | 2 | CSNK1D/CSNK1E   |
| Biological Process | GO:1905426 | positive regulation of Wnt-mediated midbrain dopaminergic neuron differentiation | 2/2279 | 2/18866 | 0.0145868 | 0.2059281 | 0.1863311 | 2 | CSNK1D/CSNK1E   |
| Biological Process | GO:1905532 | regulation of leucine import across plasma membrane                              | 2/2279 | 2/18866 | 0.0145868 | 0.2059281 | 0.1863311 | 2 | SLC43A2/SLC43A1 |
| Biological Process | GO:1905533 | negative regulation of leucine import across plasma membrane                     | 2/2279 | 2/18866 | 0.0145868 | 0.2059281 | 0.1863311 | 2 | SLC43A2/SLC43A1 |

|                    |            |                                                                       |         |           |           |           |           |    |                                                                                                                                                                 |
|--------------------|------------|-----------------------------------------------------------------------|---------|-----------|-----------|-----------|-----------|----|-----------------------------------------------------------------------------------------------------------------------------------------------------------------|
| Biological Process | GO:1905704 | positive regulation of inhibitory synapse assembly                    | 2/2279  | 2/18866   | 0.0145868 | 0.2059281 | 0.1863311 | 2  | SEMA4A/SEMA4D                                                                                                                                                   |
| Biological Process | GO:1905751 | positive regulation of endosome to plasma membrane protein transport  | 2/2279  | 2/18866   | 0.0145868 | 0.2059281 | 0.1863311 | 2  | ZDHHC2/AKAP5                                                                                                                                                    |
| Biological Process | GO:2000451 | positive regulation of CD8-positive, alpha-beta T cell extravasation  | 2/2279  | 2/18866   | 0.0145868 | 0.2059281 | 0.1863311 | 2  | CCR2/FADD                                                                                                                                                       |
| Biological Process | GO:2000452 | regulation of CD8-positive, alpha-beta cytotoxic T cell extravasation | 2/2279  | 2/18866   | 0.0145868 | 0.2059281 | 0.1863311 | 2  | RIPK3/FADD                                                                                                                                                      |
| Biological Process | GO:2000471 | regulation of hematopoietic stem cell migration                       | 2/2279  | 2/18866   | 0.0145868 | 0.2059281 | 0.1863311 | 2  | CCR2/PTPRC                                                                                                                                                      |
| Biological Process | GO:2000473 | positive regulation of hematopoietic stem cell migration              | 2/2279  | 2/18866   | 0.0145868 | 0.2059281 | 0.1863311 | 2  | CCR2/PTPRC                                                                                                                                                      |
| Biological Process | GO:2001295 | malonyl-CoA biosynthetic process                                      | 2/2279  | 2/18866   | 0.0145868 | 0.2059281 | 0.1863311 | 2  | ACACB/ACACA                                                                                                                                                     |
| Biological Process | GO:0006090 | pyruvate metabolic process                                            | 28/2279 | 152/18866 | 0.0147072 | 0.2073185 | 0.1875892 | 28 | FOXK1/HDAC4/PRKAG2/BSG/ENO1/HK1/SLC16A3/PFKFB4/RAE1/CBFA2T3/DHTKD1/APP/OGDH/ADPGK/PGAM1/PC/NUP93/ENO3/AGXT/HK2/SEC13/ESRRB/HOGA1/SLC16A1/PKM/PCK2/PFKFB3/PRKAA1 |
| Biological Process | GO:0032611 | interleukin-1 beta production                                         | 21/2279 | 106/18866 | 0.0148016 | 0.2083401 | 0.1885135 | 21 | AZU1/NLRC4/FOXP1/AIM2/NLRP3/SMAD3/MEFV/TNF/TNFAIP3/MIR101-2/MNDA/APP/GHRL/ABCA1/ARRB2/NOD2/F2R/CASP1/CD33/CX3CR1/STMP1                                          |

|                    |            |                                                 |         |           |           |           |           |    |                                                                                                                                                                                                                                                                                                                                                                                                                        |
|--------------------|------------|-------------------------------------------------|---------|-----------|-----------|-----------|-----------|----|------------------------------------------------------------------------------------------------------------------------------------------------------------------------------------------------------------------------------------------------------------------------------------------------------------------------------------------------------------------------------------------------------------------------|
| Biological Process | GO:0001558 | regulation of cell growth                       | 66/2279 | 420/18866 | 0.0149435 | 0.2100266 | 0.1900395 | 66 | SEMA6B/S100A8/RPTOR/CPNE6/CDA/ENO1/PPARG/CTDP1/RPS6KA1/SERTAD2/MFSD2A/APBB2/EXOSC2/URI1/SMAD3/CTTN/DNM2/MIR199A1/CPNE5/SGK1/BCL11A/VGLL4/SEMA4A/RTN4/KRT17/MEG3/DISC1/SLC44A4/SEMA4B/DERL2/SMARCA2/IFRD1/MUC12/ILK/SMAD7/WNT11/SPHK2/TGFB1/PHB/PTPRJ/SEMA4D/RERG/SMURF1/CHPT1/EPB41L3/CDHR2/CDH4/SH3BP4/PPP2R1A/RB1/BCL2/MIR199A2/CDKL3/SYT17/SLIT3/AGTR1/CYFIP1/TRPV2/SGK2/NDEL1/SCGB3A1/INHBA/EIF4G1/DBNL/SPART/PRKN |
| Biological Process | GO:0070588 | calcium ion transmembrane transport             | 51/2279 | 312/18866 | 0.0150075 | 0.210615  | 0.190572  | 51 | TRPM2/PDE4D/SLC25A25/THADA/CASQ2/ITPR2/LCK/CACNA1C/CACNA2D4/SLC24A4/SLC8A1/PKD1L1/ANXA6/UBASH3B/SPG7/TLR9/ATP2B2/ITPR1/BIN1/TRPM6/JSRP1/AHNAK/NOS1AP/PTPN6/RASA3/P2RY6/PHB/MYO5A/HTT/PTPRC/ATP2A3/NOL3/TPCN2/TRPM3/GSTO1/PRKCE/TMEM37/F2R/TMC1/ANO6/DYSF/CACNA1B/ANK2/CHERP/PLCG1/TRPV2/CASQ1/FGF14/CBARP/STIMATE/CRACR2A                                                                                              |
| Biological Process | GO:0061620 | glycolytic process through glucose-6-phosphate  | 8/2279  | 28/18866  | 0.0150341 | 0.2106769 | 0.190628  | 8  | FO XK1/ENO1/HK1/ADPGK/PGAM1/ENO3/HK2/PKM                                                                                                                                                                                                                                                                                                                                                                               |
| Biological Process | GO:0050777 | negative regulation of immune response          | 29/2279 | 159/18866 | 0.0150592 | 0.2107181 | 0.1906652 | 29 | TRIM27/ABR/IL10/PPARG/CD55/INPP5D/CCR2/TNF/TNFAIP3/LOXL3/CD84/DUSP22/HLA-F/PTPN6/SMAD7/ZBTB7B/TGFB1/FER/CD59/NR1H2/PGLYRP1/PTPRC/GRN/NLRCS/BCR/ARRB2/HLX/TYRO3/CD96                                                                                                                                                                                                                                                    |
| Biological Process | GO:0009185 | ribonucleoside diphosphate metabolic process    | 26/2279 | 139/18866 | 0.0151474 | 0.2109142 | 0.1908427 | 26 | FO XK1/HDAC4/PRKAG2/AMPD3/ENO1/HK1/TJP2/PFKFB4/RAE1/CBFA2T3/DHTKD1/APP/OGDH/ADPGK/PGAM1/NUP93/ENO3/HK2/SEC13/GUK1/ESRRB/PKM/AK2/AK5/PFKFB3/PRKA1                                                                                                                                                                                                                                                                       |
| Biological Process | GO:0014037 | Schwann cell differentiation                    | 10/2279 | 39/18866  | 0.0152137 | 0.2109142 | 0.1908427 | 10 | ARHGFE10/SH3TC2/SKI/LGI4/NDRG1/ILK/NF1/FA2H/CNTNAP1/RELA                                                                                                                                                                                                                                                                                                                                                               |
| Biological Process | GO:0016601 | Rac protein signal transduction                 | 10/2279 | 39/18866  | 0.0152137 | 0.2109142 | 0.1908427 | 10 | ELMO1/RHOH/RHOG/DNM2/NISCH/NF1/NCKAP1/ARHGAP17/CYFIP1/DBNL                                                                                                                                                                                                                                                                                                                                                             |
| Biological Process | GO:0030204 | chondroitin sulfate metabolic process           | 10/2279 | 39/18866  | 0.0152137 | 0.2109142 | 0.1908427 | 10 | CSGALNACT1/SPOCK2/DSE/HEXB/CHSY1/CHST11/CHST15/EGFLAM/XYL1/ARSB                                                                                                                                                                                                                                                                                                                                                        |
| Biological Process | GO:2000249 | regulation of actin cytoskeleton reorganization | 10/2279 | 39/18866  | 0.0152137 | 0.2109142 | 0.1908427 | 10 | TRPM2/ARHGDIB/CSF1R/BAIAP2L1/BAIAP2/CSF3/GMFG/BAIAP2L2/CCL27/DAPK3                                                                                                                                                                                                                                                                                                                                                     |

|                    |            |                                                         |         |           |           |           |           |    |                                                                                                                                                                                                                                                                                             |
|--------------------|------------|---------------------------------------------------------|---------|-----------|-----------|-----------|-----------|----|---------------------------------------------------------------------------------------------------------------------------------------------------------------------------------------------------------------------------------------------------------------------------------------------|
| Biological Process | GO:0009755 | hormone-mediated signaling pathway                      | 35/2279 | 200/18866 | 0.0152286 | 0.2109142 | 0.1908427 | 35 | RXRA/FOXP1/CALR/PPARG/NCOR2/ACSL1/RUNX1/AKAP13/YWHAH/PRMT2/LBH/PADI2/ZNF366/HDAC1/LATS2/ZMIZ1/PHB/CRHBP/AXIN1/KMT2D/RARA/GHRL/RARG/NCOA1/ARRB2/ARNTL/ESRRB/PER1/UBE3A/NEDD4/RNF14/NCOA4/NR5A2/NODAL/SST                                                                                     |
| Biological Process | GO:2000377 | regulation of reactive oxygen species metabolic process | 35/2279 | 200/18866 | 0.0152286 | 0.2109142 | 0.1908427 | 35 | HDAC4/IL10/CD177/SMAD3/DNM2/MIR199A1/TNF/FPR2/TGFBR2/THBS1/RAB27A/RIPK1/GNAI2/NOS1AP/MIR24-2/CLU/PAX2/SPHK2/TGFB1/HBB/RIPK3/HK2/PDGFB/BCR/NFE2L2/ITGB2/BCL2/MIR199A2/FOXO1/AGTR1/PDGFRB/FOXO1/CX3CR1/SIRT3/PRKN                                                                             |
| Biological Process | GO:0032409 | regulation of transporter activity                      | 48/2279 | 291/18866 | 0.0152992 | 0.2115836 | 0.1914484 | 48 | PDE4D/KCNE1/PPARG/THADA/CASQ2/WWP2/FXYD2/YWHAH/FXYD1/CCR2/DNM2/SGK1/TLR9/KCTD7/TESC/JSRP1/AHNAK/RIPK1/APP/NOS1AP/ACTN4/P2RY6/SPHK2/CRHBP/CNIH2/HTR3A/MYO5A/HTT/CAB39/MAPK8IP2/GSG1L/SYNGR3/BCL2/GSTO1/MEF2C/SHANK2/PRKCE/NEDD4/DYSF/ANK2/HECW2/SGK2/PDZK1/CASQ1/FGF14/CBARP/STIMATE/CRACR2A |
| Biological Process | GO:2001242 | regulation of intrinsic apoptotic signaling pathway     | 30/2279 | 166/18866 | 0.0153679 | 0.2120696 | 0.1918881 | 30 | S100A8/P4HB/ENO1/LCK/URI1/PLAGL2/BMF/NCK2/RRM2B/NACC2/ZNF385A/CLU/HDAC1/SGMS1/RIPK3/NOL3/NFE2L2/ANKRD2/FIS1/DAPK2/BCL2/DNM1L/ARHGEF2/BCL2L1/CYLD/BAG5/GRINA/PRKN/MARCHF7/FBH1                                                                                                               |
| Biological Process | GO:0007411 | axon guidance                                           | 47/2279 | 284/18866 | 0.015379  | 0.2120696 | 0.1918881 | 47 | SEMA6B/PLXNC1/BSG/NRP2/TRIO/PIK3CD/RHOH/APBB2/PIK3R1/RHOG/GAB2/PRKCA/DRGX/CSF1R/DOK1/EPHB3/SEMA4A/UNC5B/DOK2/GRB10/SEMA4B/APP/FEZ2/SEMA4D/ZSW1M5/NRXN1/DSCAML1/BMPR1B/KIF5C/CDH4/SPTA1/KLF7/NTRK1/NOTCH1/MYOT/SLIT3/SPTAN1/PLCG1/CYFIP1/EZR/SLIT1/SPTBN4/OTX2/LYPLA2/UNC5D/B3GNT2/NECTIN1   |
| Biological Process | GO:0030219 | megakaryocyte differentiation                           | 20/2279 | 100/18866 | 0.0154805 | 0.2128518 | 0.1925959 | 20 | ZFPM1/RUNX1/FLI1/ASH2L/TNRC6B/AGO1/TESC/THBS1/PIP4K2A/ITGA2B/PTPN6/ZNF385A/HDAC1/MTURN/KMT2D/SP3/SETD1A/MEIS1/MEF2C/H3C1                                                                                                                                                                    |
| Biological Process | GO:0045807 | positive regulation of endocytosis                      | 20/2279 | 100/18866 | 0.0154805 | 0.2128518 | 0.1925959 | 20 | AP2A1/PPARG/ANKFY1/ANGPT1/ARRB1/DNM2/RAB31/ITSN1/DLL1/MIB1/ACTN4/CLU/WASL/SH3GL1/DGKD/ARRB2/DNM1/DNM1L/ANO6/FLOT1                                                                                                                                                                           |
| Biological Process | GO:0048705 | skeletal system morphogenesis                           | 39/2279 | 228/18866 | 0.0155667 | 0.2132297 | 0.1929378 | 39 | CSGALNACT1/ARID5B/FOXN3/MEF2D/LRP5L/SKI/CHSY1/SETD2/ANKRD11/SMAD3/MTHFD1L/FGR/ANXA6/SH3PXD2B/CHST11/TGFBR2/ALPL/NDST1/POC1A/FGFR1/RDH10/RARA/POR/DSCAML1/RARG/BMPR1B/GRHL2/RUNX2/IFT140/MTHFD1/HOXA9/ALX3/MEF2C/NPPC/LTF/PDGFRB/NODAL/HOXB7/RFLNA                                           |
| Biological Process | GO:0048872 | homeostasis of number of cells                          | 43/2279 | 256/18866 | 0.0155875 | 0.2132297 | 0.1929378 | 43 | MAEA/KLF1/ZFPM1/LAT/AMPD3/PIK3CD/INPP5D/TRIM10/ITPKB/CCR2/TNFAIP3/TNFSF13B/HIPK2/SLC11A2/BRD1/TMOD3/RIPK3/ZC3H8/JAM3/SP3/ALAS1/SFXN1/BCL10/BCR/SPTA1/ETS1/DOCK10/ADD1/RB1/BCL2/NOTCH1/MEF2C/EPAS1/UBAP2L/F2R/CYLD/EPB42/KAT7/INHBA/ERCC2/FADD/MB/TMEM14C                                    |

|                    |            |                                                                        |         |           |           |           |           |    |                                                                                                                                                                                                                                          |
|--------------------|------------|------------------------------------------------------------------------|---------|-----------|-----------|-----------|-----------|----|------------------------------------------------------------------------------------------------------------------------------------------------------------------------------------------------------------------------------------------|
| Biological Process | GO:0001938 | positive regulation of endothelial cell proliferation                  | 22/2279 | 113/18866 | 0.0155972 | 0.2132297 | 0.1929378 | 22 | LRG1/RPTOR/NRP2/IL10/PRKCA/EGFL7/MIR101-2/STAT5A/AKT3/MIR27A/MIR23A/FGFR1/ZNF580/NF1/ITGB3/GHRL/PDGFB/AGTR1/DYSF/PPP1R16B/TNFSF12/PLCG1                                                                                                  |
| Biological Process | GO:0071695 | anatomical structure maturation                                        | 40/2279 | 235/18866 | 0.0155978 | 0.2132297 | 0.1929378 | 40 | MAEA/PPARG/BRCA2/LGI4/SLFN14/LYL1/BCL11A/RFX3/BRD1/APP/RBPJ/PAX2/CDH3/FGFR1/XYLT1/SEMA4D/DEFB1/MYO5A/NF1/RUNX2/PPP2R1A/FEV/RB1/POU2F2/BCL2/DMC1/E<br>PAS1/NPPC/LTF/ANO6/FAM20C/EPB42/CLN5/ALDH1A2/SPTBN4/ERCC2/GLDN/CX3CR1/RFLNA/ANGPTL8 |
| Biological Process | GO:0042772 | DNA damage response, signal transduction resulting in transcription    | 6/2279  | 18/18866  | 0.0157994 | 0.2150668 | 0.1946001 | 6  | BRCA2/HIPK2/ZNF385A/SP100/FOXO1/CHEK2                                                                                                                                                                                                    |
| Biological Process | GO:2000303 | regulation of ceramide biosynthetic process                            | 6/2279  | 18/18866  | 0.0157994 | 0.2150668 | 0.1946001 | 6  | TNF/ORMDL3/TNFRSF1A/SPHK2/SIRT3/PRKAA1                                                                                                                                                                                                   |
| Biological Process | GO:0032703 | negative regulation of interleukin-2 production                        | 7/2279  | 23/18866  | 0.0158001 | 0.2150668 | 0.1946001 | 7  | TRIM27/HDAC7/TNFAIP3/SFTPD/NAV3/PTPRC/EZR                                                                                                                                                                                                |
| Biological Process | GO:0033143 | regulation of intracellular steroid hormone receptor signaling pathway | 16/2279 | 75/18866  | 0.0159478 | 0.2151981 | 0.1947189 | 16 | FOXP1/CALR/NCOR2/RUNX1/PRMT2/LBH/ZNF366/HDAC1/PHB/AXIN1/KMT2D/ARRB2/ARNTL/PER1/RNF14/NODAL                                                                                                                                               |
| Biological Process | GO:0046323 | glucose import                                                         | 16/2279 | 75/18866  | 0.0159478 | 0.2151981 | 0.1947189 | 16 | PRKAG2/MIR143/PIK3R1/TNF/GRB10/ZDHHC7/HNF1A/SLC1A2/HK2/PRKCI/NFE2L2/SORT1/SLC2A1/RTN2/ASPSCR1/CLTCL1                                                                                                                                     |
| Biological Process | GO:0099518 | vesicle cytoskeletal trafficking                                       | 16/2279 | 75/18866  | 0.0159478 | 0.2151981 | 0.1947189 | 16 | PRKCZ/NDE1/KIF13A/DYNC1H1/ACTN4/WASL/CNIH2/MYO5A/HTT/KIF1B/KIFAP3/MYO1C/AP3D1/FBXW11/NDEL1/DTNBP1                                                                                                                                        |
| Biological Process | GO:1900076 | regulation of cellular response to insulin stimulus                    | 16/2279 | 75/18866  | 0.0159478 | 0.2151981 | 0.1947189 | 16 | PRKCZ/SORL1/FUT7/KANK1/PTPRE/PIK3R1/GPLD1/BAIAP2L1/GRB10/GNAI2/ZBTB7B/PRKCB/MYO1C/TSC2/RELA/PRKAA1                                                                                                                                       |

|                    |            |                                                         |        |         |           |           |           |   |                            |
|--------------------|------------|---------------------------------------------------------|--------|---------|-----------|-----------|-----------|---|----------------------------|
| Biological Process | GO:0033292 | T-tubule organization                                   | 4/2279 | 9/18866 | 0.0161948 | 0.2151981 | 0.1947189 | 4 | BIN1/DYSF/ANK2/SYPL2       |
| Biological Process | GO:0034139 | regulation of toll-like receptor 3 signaling pathway    | 4/2279 | 9/18866 | 0.0161948 | 0.2151981 | 0.1947189 | 4 | TNFAIP3/WDFY1/FLOT1/PELI1  |
| Biological Process | GO:0043129 | surfactant homeostasis                                  | 4/2279 | 9/18866 | 0.0161948 | 0.2151981 | 0.1947189 | 4 | LPCAT1/SFTPD/CTSH/EPAS1    |
| Biological Process | GO:0045542 | positive regulation of cholesterol biosynthetic process | 4/2279 | 9/18866 | 0.0161948 | 0.2151981 | 0.1947189 | 4 | ABCG1/POR/SREBF1/PRKAA1    |
| Biological Process | GO:0045762 | positive regulation of adenylate cyclase activity       | 4/2279 | 9/18866 | 0.0161948 | 0.2151981 | 0.1947189 | 4 | TIMP2/CACNA1C/AKAP5/NF1    |
| Biological Process | GO:0045955 | negative regulation of calcium ion-dependent exocytosis | 4/2279 | 9/18866 | 0.0161948 | 0.2151981 | 0.1947189 | 4 | RAP1B/GNAI2/NOTCH1/CBARP   |
| Biological Process | GO:0046951 | ketone body biosynthetic process                        | 4/2279 | 9/18866 | 0.0161948 | 0.2151981 | 0.1947189 | 4 | BDH1/HMGCL/ACAT1/ACSS3     |
| Biological Process | GO:0048478 | replication fork protection                             | 4/2279 | 9/18866 | 0.0161948 | 0.2151981 | 0.1947189 | 4 | BLM/BRCA2/SMARCAL1/FBH1    |
| Biological Process | GO:0072102 | glomerulus morphogenesis                                | 4/2279 | 9/18866 | 0.0161948 | 0.2151981 | 0.1947189 | 4 | KIRREL3/MTSS1/MEF2C/PDGFRB |

|                    |            |                                                          |         |           |           |           |           |    |                                                                                                                                                                                                                                                                                              |
|--------------------|------------|----------------------------------------------------------|---------|-----------|-----------|-----------|-----------|----|----------------------------------------------------------------------------------------------------------------------------------------------------------------------------------------------------------------------------------------------------------------------------------------------|
| Biological Process | GO:0106120 | positive regulation of sterol biosynthetic process       | 4/2279  | 9/18866   | 0.0161948 | 0.2151981 | 0.1947189 | 4  | ABCG1/POR/SREBF1/PRKAA1                                                                                                                                                                                                                                                                      |
| Biological Process | GO:1901072 | glucosamine-containing compound catabolic process        | 4/2279  | 9/18866   | 0.0161948 | 0.2151981 | 0.1947189 | 4  | AMDHD2/CHI3L1/CHIT1/CHI3L2                                                                                                                                                                                                                                                                   |
| Biological Process | GO:1903423 | positive regulation of synaptic vesicle recycling        | 4/2279  | 9/18866   | 0.0161948 | 0.2151981 | 0.1947189 | 4  | SH3GL1/DNM1/DNM3/DNM1L                                                                                                                                                                                                                                                                       |
| Biological Process | GO:1904177 | regulation of adipose tissue development                 | 4/2279  | 9/18866   | 0.0161948 | 0.2151981 | 0.1947189 | 4  | SORL1/SH3PXD2B/GHRL/KLF7                                                                                                                                                                                                                                                                     |
| Biological Process | GO:0030032 | lamellipodium assembly                                   | 15/2279 | 69/18866  | 0.0162983 | 0.216271  | 0.1956896 | 15 | HDAC4/PARVB/ARHGEF7/DNM2/NCK2/WHAMM/SPATA13/ABLIM3/FER/VAV2/NCKAP1/AVIL/CYFIP1/ABLIM1/VAV3                                                                                                                                                                                                   |
| Biological Process | GO:0097485 | neuron projection guidance                               | 47/2279 | 285/18866 | 0.0163214 | 0.2162759 | 0.1956941 | 47 | SEMA6B/PLXNC1/BSG/NRP2/TRIO/PIK3CD/RHOH/APBB2/PIK3R1/RHOG/GAB2/PRKCA/DRGX/CSF1R/DOK1/EPHB3/SEMA4A/UNC5B/DOK2/GRB10/SEMA4B/APP/FEZ2/SEMA4D/ZSWI/M5/NRXN1/DSCAML1/BMPR1B/KIF5C/CDH4/SPTA1/KLF7/NTRK1/NOTCH1/MYOT/SLIT3/SPTAN1/PLCG1/CYFIP1/EZR/SLIT1/SPTBN4/OTX2/LYPLA2/UNC5D/B3GNT2/NECTIN1   |
| Biological Process | GO:0035601 | protein deacylation                                      | 21/2279 | 107/18866 | 0.0163813 | 0.2167667 | 0.1961382 | 21 | HDAC4/SPRED2/HDAC7/SIN3B/SKI/C6orf89/HDAC1/SPHK2/ZBTB7B/PHB/MTA1/CTBP1/MTA2/PER2/PER1/NEK3/SREBF1/LYPLA2/ELK4/SIRT3/PRKAA1                                                                                                                                                                   |
| Biological Process | GO:0043491 | protein kinase B signaling                               | 46/2279 | 278/18866 | 0.0164075 | 0.2168123 | 0.1961795 | 46 | TGFA/PIK3CD/LCK/MIR143/MIR145/CHI3L1/ANGPT1/PIK3AP1/ITGB1BP1/PIK3R1/RHOG/MIR199A1/TNF/CCL5/PHLPP1/ITSN1/RTN4/THBS1/PIK3R5/TCF7L2/ILK/CPNE1/IGF1R/PAX2/GFR1/TGFB1/PHB/PTPRJ/PPP2R5C/CSF3/STK3/PDGFB/ENG/ARRB2/MIR138-2/NTRK1/MIR199A2/GCNT2/BANK1/TSC2/PDGFRB/TYRO3/ADTRP/INPP5F/CX3CR1/MYORG |
| Biological Process | GO:0002762 | negative regulation of myeloid leukocyte differentiation | 12/2279 | 51/18866  | 0.0164574 | 0.2171688 | 0.196502  | 12 | ZFPM1/INPP5D/PIK3R1/UBASH3B/RARA/TMEM178A/LILRB4/NF1/LRRC17/LTF/TRIB1/INHBA                                                                                                                                                                                                                  |



|                    |            |                                                          |         |           |           |           |           |    |                                                                                                                                                                                                                                                                                                                                                                                                                                                |
|--------------------|------------|----------------------------------------------------------|---------|-----------|-----------|-----------|-----------|----|------------------------------------------------------------------------------------------------------------------------------------------------------------------------------------------------------------------------------------------------------------------------------------------------------------------------------------------------------------------------------------------------------------------------------------------------|
| Biological Process | GO:0030258 | lipid modification                                       | 45/2279 | 271/18866 | 0.0164827 | 0.2172009 | 0.1965311 | 45 | PRKAG2/SYNJ2/PPARG/PIK3CD/MFSD2A/INPP5A/PIP5K1B/INPP5D/PIK3R1/ITPKB/PIK3R6/AMACR/ABCG1/TTC7A/ACOXL/PIP4K2A/MIR27A/SPHK2/ACADM/TTC7B/DGKQ/POR/ACACB/ST3GAL4/DGKA/DGKD/INPP5E/IMPA2/ACOX2/PI4K2A/SGPP1/SGPP2/PI4KA/FA2H/AGTR1/ACAT1/CPT1A/INPP5F/CERK/ST3GAL2/ACADVL/PRKAA1/IP6K1/SLA2/PLPP3                                                                                                                                                     |
| Biological Process | GO:0097553 | calcium ion transmembrane import into cytosol            | 26/2279 | 140/18866 | 0.0165277 | 0.2172295 | 0.196557  | 26 | TRPM2/PDE4D/CASQ2/ITPR2/LCK/CACNA1C/SLC8A1/UBASH3B/ITPR1/JSRP1/PTPN6/RASA3/P2RY6/MYO5A/HTT/PTPRC/NOL3/TPCN2/GSTO1/PRKCE/F2R/ANK2/CHERP/PLCG1/TRPV2/CASQ1                                                                                                                                                                                                                                                                                       |
| Biological Process | GO:2000514 | regulation of CD4-positive, alpha-beta T cell activation | 14/2279 | 63/18866  | 0.0165306 | 0.2172295 | 0.196557  | 14 | IL27/PRKCZ/MYB/RUNX1/CD55/NLRP3/LOXL3/TGFBR2/SMAD7/ZBTB7B/RARA/HLX/RUNX3/VSIR                                                                                                                                                                                                                                                                                                                                                                  |
| Biological Process | GO:0046854 | phosphatidylinositol phosphorylation                     | 13/2279 | 57/18866  | 0.016602  | 0.2178673 | 0.1971341 | 13 | PIK3CD/PIP5K1B/PIK3R1/ITPKB/PIK3R6/TTC7A/PIP4K2A/TTC7B/IMPA2/PI4K2A/PI4KA/IP6K1/SLA2                                                                                                                                                                                                                                                                                                                                                           |
| Biological Process | GO:0009100 | glycoprotein metabolic process                           | 65/2279 | 415/18866 | 0.0166982 | 0.2188272 | 0.1980026 | 65 | CSGALNACT1/FUT4/GALNT2/FUT7/SPOCK2/RPN1/XXYLT1/HS3ST3B1/DSE/SLC35C2/HEXB/MGAT5/ST6GALNAC1/GALNT12/CHSY1/AMFR/MGAT4A/MIR101-2/CHST11/MGAT3/EDEM1/CHST15/NDST1/EGFLAM/TCF7L2/DERL2/MUC12/PCSK6/ASGR2/AGO2/XYLT1/GXYLT2/B4GALT7/POMT2/ADAMTS13/MUC20/B3GNT5/ST6GAL1/TNIP1/ITM2C/BMPR1B/EDEM2/ST8SIA6/ST3GAL4/PLCB1/TET2/B4GALT3/PMM2/NPC1/ARSB/BCL2/GALNT9/FUT11/GCNT2/GFPT2/LMF1/ALG11/PHLDA1/MAN1C1/DPAGT1/ST3GAL2/MARCHF6/B3GNT2/B4GAT1/PXYLP1 |
| Biological Process | GO:1901879 | regulation of protein depolymerization                   | 18/2279 | 88/18866  | 0.0168086 | 0.2199702 | 0.1990368 | 18 | VILL/GSN/CAPG/NAV3/TMOD3/SVIL/WDR1/SPTA1/ADD1/MAP1A/AVIL/FLII/ARHGEF2/SPTAN1/ASPH/TMOD1/SPTBN4/SPEF1                                                                                                                                                                                                                                                                                                                                           |
| Biological Process | GO:0043094 | cellular metabolic compound salvage                      | 9/2279  | 34/18866  | 0.0169395 | 0.2205574 | 0.1995682 | 9  | CDA/AMPD3/TK2/UCK2/PNP/PDXK/GMPR2/ADI1/TK1                                                                                                                                                                                                                                                                                                                                                                                                     |
| Biological Process | GO:0055094 | response to lipoprotein particle                         | 9/2279  | 34/18866  | 0.0169395 | 0.2205574 | 0.1995682 | 9  | CD9/PPARG/MIA3/ABCA1/ITGB2/NPC1/CD68/HMGCS1/ADTRP                                                                                                                                                                                                                                                                                                                                                                                              |
| Biological Process | GO:2000780 | negative regulation of double-strand break repair        | 9/2279  | 34/18866  | 0.0169395 | 0.2205574 | 0.1995682 | 9  | RMI2/RECL5/OTUB2/OTUB1/TP53BP1/TRIP12/TFIP11/CYREN/FBH1                                                                                                                                                                                                                                                                                                                                                                                        |

|                    |            |                                                            |         |           |           |           |           |    |                                                                                                                                                                                                                                                                                                                                                                |
|--------------------|------------|------------------------------------------------------------|---------|-----------|-----------|-----------|-----------|----|----------------------------------------------------------------------------------------------------------------------------------------------------------------------------------------------------------------------------------------------------------------------------------------------------------------------------------------------------------------|
| Biological Process | GO:0019079 | viral genome replication                                   | 24/2279 | 127/18866 | 0.0169463 | 0.2205574 | 0.1995682 | 24 | SLPI/TRIM38/SRPK2/TNF/CCL5/LARP1/PHB/CTBP1/CTBP2/TNIP1/BCL2/PI4KA/NOTCH1/LTF/ILF3/MX1/NR5A2/PARP10/BANF1/ISG20/NFIA/GRK2/PRKN/SHFL                                                                                                                                                                                                                             |
| Biological Process | GO:0031098 | stress-activated protein kinase signaling cascade          | 49/2279 | 300/18866 | 0.0170735 | 0.22176   | 0.2006563 | 49 | MAP3K3/CCDC88C/HIPK3/ERN1/ZNF622/TNF/ZEB2/TRAF2/TRAF1/CCM2/PHLPP1/HIPK2/TLR9/DUSP22/TNIK/RIPK1/APP/IGF1R/MTURN/SCIMP/AXIN1/COPSS/UBE2V1/SH3RF3/SH2D3C/STK3/PLCB1/MAPK8IP2/TAOK3/MIR138-2/IRAK2/NOD2/PER1/DUSP3/FOXO1/FOXO1/GADD45G/GDF6/TRIB1/CYLD/ANKRD6/FBXW11/EZR/KAT7/DTNBP1/MECOM/DBNL/PRKN/MAP3K20                                                       |
| Biological Process | GO:0008361 | regulation of cell size                                    | 32/2279 | 181/18866 | 0.0171087 | 0.22176   | 0.2006563 | 32 | SEMA6B/RPTOR/CLCN6/CREB1/CTTN/DNM2/SEMA4A/RTN4/DISC1/SEMA4B/IFRD1/ILK/SEMA4D/AQP1/VAV2/RARG/GNB3/CDH4/ADD1/CDKL3/ANO6/CYFIP1/TRPV2/WDTDC1/NDEL1/SLC12A1/RAP1GAP2/SLC12A7/ANXA7/VAV3/DBNL/SPART                                                                                                                                                                 |
| Biological Process | GO:0010950 | positive regulation of endopeptidase activity              | 32/2279 | 181/18866 | 0.0171087 | 0.22176   | 0.2006563 | 32 | NLRC4/S100A8/GRAMD4/AIM2/PPARG/GSN/LCK/NLRP3/SMAD3/ARRB1/MEFV/TNF/TRAF2/CYFIP2/TBC1D10A/CTSD/CTSH/RIPK1/MBP/CIDEB/PERP/BCL10/ATP2A3/FIS1/P2RX1/F2R/CASP1/BCL2L13/ASPH/NODAL/FADD/VSIR                                                                                                                                                                          |
| Biological Process | GO:0030838 | positive regulation of actin filament polymerization       | 20/2279 | 101/18866 | 0.017176  | 0.2220263 | 0.2008973 | 20 | TRIM27/GSN/CTTN/NCK2/WHAMM/BAIAP2L1/CDC42EP1/BIN1/BAIAP2/WASL/FER/PFN1/CSF3/GMFB/NCKAP1/PRKCE/MYO1C/CYFIP1/GMFG/BAIAP2L2                                                                                                                                                                                                                                       |
| Biological Process | GO:0060191 | regulation of lipase activity                              | 20/2279 | 101/18866 | 0.017176  | 0.2220263 | 0.2008973 | 20 | PRKCZ/LIPC/CCL5/PCSK6/FLT1/P2RY6/FGFR1/PHB/POR/NR1H2/SORT1/LPAR2/S1PR4/LMF1/ABHD5/AGTR1/PDGFRB/PLCG1/NTF4/ANGPTL8                                                                                                                                                                                                                                              |
| Biological Process | GO:0043123 | positive regulation of I-kappaB kinase/NF-kappaB signaling | 33/2279 | 188/18866 | 0.0172913 | 0.2231538 | 0.2019175 | 33 | TRIM27/BRD4/TRIM38/TRIM8/MAP3K3/AKAP13/TNF/TRAF2/CXXC5/TLR9/RIPK1/TNFRSF1A/PLEKHG5/LITAF/PRKCB/TRIM5/UBE2V1/BCL10/ZDHHC17/MAP3K14/NEK6/NOD2/PRKCE/TRAF3IP2/F2R/LTF/CASP1/RELA/CX3CR1/FADD/PELI1/EEF1D/PRKN                                                                                                                                                     |
| Biological Process | GO:0051403 | stress-activated MAPK cascade                              | 47/2279 | 286/18866 | 0.0173102 | 0.2231538 | 0.2019175 | 47 | MAP3K3/HIPK3/ERN1/ZNF622/TNF/ZEB2/TRAF2/TRAF1/CCM2/PHLPP1/HIPK2/TLR9/DUSP22/TNIK/RIPK1/APP/IGF1R/MTURN/SCIMP/AXIN1/COPSS/UBE2V1/SH3RF3/SH2D3C/STK3/PLCB1/MAPK8IP2/TAOK3/MIR138-2/IRAK2/NOD2/PER1/DUSP3/FOXO1/FOXO1/GADD45G/GDF6/TRIB1/CYLD/ANKRD6/FBXW11/EZR/DTNBP1/MECOM/DBNL/PRKN/MAP3K20                                                                    |
| Biological Process | GO:0032386 | regulation of intracellular transport                      | 57/2279 | 358/18866 | 0.0176055 | 0.2266534 | 0.2050841 | 57 | EHD1/SORL1/KCNE1/SH3TC2/TFDP1/PRR5L/TM9SF4/TMEM30A/YWHAH/ANGPT1/ITGB1BP1/PIK3R1/SETD2/SMAD3/SUFU/DYNC1H1/UBAC2/JUP/EDEM1/USP36/SNX3/ZDHHC2/TCF7L2/DERL2/ABLIM3/AKAP5/UBE2J2/TGFB1/MLC1/CNIH2/NF1/EDEM2/NUMA1/ITGB2/YWHAZ/CDH1/FIS1/BCL2/TTC21B/CABP1/SP100/NEDD4/TP53BP2/MYO1C/MIEF1/ARHGAP1/SPAG5/SREBF1/YWHAQ/NDEL1/INPP5F/EZR/PDZK1/SVIP/PRKAA1/PRKN/RIPOR1 |

|                    |            |                                                  |         |           |           |           |           |    |                                                                                                                                                                                                                                                            |
|--------------------|------------|--------------------------------------------------|---------|-----------|-----------|-----------|-----------|----|------------------------------------------------------------------------------------------------------------------------------------------------------------------------------------------------------------------------------------------------------------|
| Biological Process | GO:0051495 | positive regulation of cytoskeleton organization | 39/2279 | 230/18866 | 0.0177712 | 0.2284763 | 0.2067334 | 39 | ARHGEF10/TRIM27/DCTN1/GSN/ITGB1BP1/SMAD3/CTTN/NCK2/DYNC1H1/SH3PXD2B/WHAMM/BAIAP2L1/NAV3/CDC42EP1/BIN1/BAIAP2/SYNPO2L/POC1A/PXN/WNT11/WASL/FER/PFN1/CSF3/GMFB/NUMA1/WDR1/NCKAP1/ARHGEF10L/PRKCE/MYO1C/ARHGEF15/SPAG5/CYFIP1/GMFG/BAIAP2L2/CCL27/PFDN2/SYNPO |
| Biological Process | GO:0032612 | interleukin-1 production                         | 23/2279 | 121/18866 | 0.0179055 | 0.2298927 | 0.2080151 | 23 | AZU1/NLRC4/FOXP1/IL10/AIM2/IL16/NLRP3/SMAD3/MEFV/TNF/TNFAIP3/MIR101-2/MNDA/APP/GHRL/ABCA1/ARRB2/NOD2/F2R/CASP1/CD33/CX3CR1/STMP1                                                                                                                           |
| Biological Process | GO:0051668 | localization within membrane                     | 19/2279 | 95/18866  | 0.0179733 | 0.2304516 | 0.2085208 | 19 | SSH1/GSN/ITGB1BP1/COLQ/SEC23B/ZDHHC2/MIA3/SYNGAP1/CNIH2/NRXN1/SEC13/PTPRC/NRXN2/ITGB2/SEC24C/RALA/RILPL1/DOCK2/SEC31A                                                                                                                                      |
| Biological Process | GO:0030010 | establishment of cell polarity                   | 26/2279 | 141/18866 | 0.0180058 | 0.2305564 | 0.2086156 | 26 | PRKCZ/DCTN1/GSN/KANK1/NDE1/CRB1/RAP1B/FRMD4A/SNX27/MYO18A/MYH9/DOCK8/FRMD4B/JAM3/HTT/NUMA1/PRKCI/SDCCAG8/MPP7/ARHGEF2/NEK3/DOCK2/MARK2/FBXW11/NDEL1/CYRIB                                                                                                  |
| Biological Process | GO:0001909 | leukocyte mediated cytotoxicity                  | 21/2279 | 108/18866 | 0.0180903 | 0.2307057 | 0.2087507 | 21 | AZU1/ELANE/CTSG/LYST/PIK3R6/SLAMF7/CTSH/TUBB4B/RAB27A/CD226/HLA-F/PTPN6/NCR1/RIPK3/PTPRC/ARRB2/IL18RAP/DNASE1L3/CADM1/FADD/CYRIB                                                                                                                           |
| Biological Process | GO:0007229 | integrin-mediated signaling pathway              | 21/2279 | 108/18866 | 0.0180903 | 0.2307057 | 0.2087507 | 21 | ITGAE/LAT/CD177/DOCK1/ITGB1BP1/FGR/LOXL3/CCM2/CUL3/MYH9/ITGA2B/ILK/ITGB5/ADAMTS13/ITGB3/ITGB2/PRAM1/ITGB6/VAV3/FYB1/PLPP3                                                                                                                                  |
| Biological Process | GO:0032526 | response to retinoic acid                        | 21/2279 | 108/18866 | 0.0180903 | 0.2307057 | 0.2087507 | 21 | RXRA/PPARG/CREB1/MYB/HSD17B2/TESC/CTSH/WNT11/PAX2/AQP1/RARA/RARG/WNT5B/ABCA1/NCOA1/GJB3/AQP3/PDGFRB/TEAD2/SREBF1/ALDH1A2                                                                                                                                   |
| Biological Process | GO:0000096 | sulfur amino acid metabolic process              | 10/2279 | 40/18866  | 0.0181475 | 0.230816  | 0.2088505 | 10 | GADL1/GGT1/CBS/MSRA/COMT/AGXT/MTHFD1/ADO/MAT1A/ADI1                                                                                                                                                                                                        |
| Biological Process | GO:0006623 | protein targeting to vacuole                     | 10/2279 | 40/18866  | 0.0181475 | 0.230816  | 0.2088505 | 10 | SORL1/VTI1A/VPS13D/CLU/SMURF1/NUMA1/SORT1/NEDD4/AP3D1/NCOA4                                                                                                                                                                                                |

|                    |            |                                                   |         |           |           |           |           |    |                                                                                                                                                                                                                                                                                                                                            |
|--------------------|------------|---------------------------------------------------|---------|-----------|-----------|-----------|-----------|----|--------------------------------------------------------------------------------------------------------------------------------------------------------------------------------------------------------------------------------------------------------------------------------------------------------------------------------------------|
| Biological Process | GO:0010921 | regulation of phosphatase activity                | 31/2279 | 175/18866 | 0.018223  | 0.2314667 | 0.2094392 | 31 | LMTK2/MGAT5/PPP1R1B/URI1/SMAD3/CABIN1/GLPD1/TNF/CCDC8/GNAI2/ELFN2/RCAN1/PHACTR2/FARP1/SEMA4D/PPP2R5C/RIPK3/HTT/PTPRC/PPP2R1A/PPP2R5E/PPP2R5D/MEF2C/PPP2R1B/PDGFRB/WDR81/PPP1R16B/CD33/SPOCD1/ANKLE2/PTPA                                                                                                                                   |
| Biological Process | GO:2001252 | positive regulation of chromosome organization    | 32/2279 | 182/18866 | 0.0184268 | 0.2337429 | 0.2114989 | 32 | BRD4/TNKS/MYB/HMBOX1/ARRB1/RTEL1/NSMCE2/C6orf89/CUL3/CDC16/RPS6KA4/SPHK2/ZBTB7B/PAX7/CTBP1/ATF7IP/NUMA1/PHF19/RB1/DNMT1/PIH1D1/ANAPC7/ERCC1/SREBF1/SLX4/RNF40/KAT7/CCT6A/LIF/PAXIP1/NSD3/SLF1                                                                                                                                              |
| Biological Process | GO:0044839 | cell cycle G2/M phase transition                  | 45/2279 | 273/18866 | 0.0185825 | 0.2342787 | 0.2119837 | 45 | TRIM39/BLM/BRD4/DCTN1/FZR1/CSNK1D/FOXN3/NDE1/DNM2/HUS1/DYNC1H1/TUBB4B/CEP135/APP/CDK14/CDC25A/CEP164/DCTN2/CEP78/CSNK1E/PSMF1/PPP2R1A/PLCB1/CCNH/PPP1CB/TUBA4A/TAOK3/SDCCAG8/ZFYVE19/ESRRB/CLSPN/PSMB7/FBXL6/FOXM1/CHEK2/BACH1/FBXW11/PHLDA1/CEP72/CCNY/NAE1/PSMD13/PAXIP1/ABRAXAS1/BABAM2                                                 |
| Biological Process | GO:0006470 | protein dephosphorylation                         | 52/2279 | 323/18866 | 0.0185891 | 0.2342787 | 0.2119837 | 52 | LMTK2/SSH1/CTDP1/PTPRE/LCK/MGAT5/PPP1R1B/URI1/DUSP14/CABIN1/TNF/UBASH3B/PHLPP1/DUSP22/PGP/CTDSPL/GNAI2/PTPN6/CAMTA1/SSH3/ELFN2/RCAN1/PHACTR2/DUSP28/PTPRN2/CDC25A/TGFB1/PTPRJ/PPP2R5C/LRRK1/HTT/PTPRC/PPP2R1A/PALD1/PPP1CB/PPP2R5E/PPP2R5D/DAPP1/BCL2/DUSP3/PPP2R1B/PDGFRB/PPP1R16B/RPRD1B/CDC14A/FBXW11/CD33/ANKLE2/LHPP/PPM1N/PTPRU/PTPA |
| Biological Process | GO:0033032 | regulation of myeloid cell apoptotic process      | 8/2279  | 29/18866  | 0.018617  | 0.2342787 | 0.2119837 | 8  | MAEA/PIK3CD/ITPKB/CCL5/CLEC5A/NOD2/BCL2/MEF2C                                                                                                                                                                                                                                                                                              |
| Biological Process | GO:0042634 | regulation of hair cycle                          | 8/2279  | 29/18866  | 0.018617  | 0.2342787 | 0.2119837 | 8  | TNF/KRT17/CDH3/EPS8L3/NUMA1/ARNTL/PER1/FA2H                                                                                                                                                                                                                                                                                                |
| Biological Process | GO:0045671 | negative regulation of osteoclast differentiation | 8/2279  | 29/18866  | 0.018617  | 0.2342787 | 0.2119837 | 8  | INPP5D/PIK3R1/UBASH3B/TMEM178A/LILRB4/NF1/LRRC17/LTF                                                                                                                                                                                                                                                                                       |
| Biological Process | GO:0061615 | glycolytic process through fructose-6-phosphate   | 8/2279  | 29/18866  | 0.018617  | 0.2342787 | 0.2119837 | 8  | FOXK1/ENO1/HK1/ADPGK/PGAM1/ENO3/HK2/PKM                                                                                                                                                                                                                                                                                                    |
| Biological Process | GO:0007565 | female pregnancy                                  | 34/2279 | 196/18866 | 0.0187258 | 0.2353364 | 0.2129407 | 34 | KLF1/BSG/RXRA/CALR/FUT7/LNPEP/ARHGDI1B/VDR/ABCC2/PNOC/TGFB2/COMT/AGO2/SPHK2/CRHBP/SLC19A1/RARA/SP3/DAZAP1/GHRL/CTSB/ETS1/BCL2/VMP1/TPPP3/STOX2/TMED2/SLC2A1/DHODH/HSD11B2/NODAL/LIF/PRLHR/PSG2                                                                                                                                             |

|                    |            |                                                              |         |           |           |           |           |    |                                                                                                                                                                      |
|--------------------|------------|--------------------------------------------------------------|---------|-----------|-----------|-----------|-----------|----|----------------------------------------------------------------------------------------------------------------------------------------------------------------------|
| Biological Process | GO:1901019 | regulation of calcium ion transmembrane transporter activity | 18/2279 | 89/18866  | 0.0187624 | 0.2354841 | 0.2130744 | 18 | PDE4D/THADA/CASQ2/TLR9/JSRP1/AHNAK/NOS1AP/P2RY6/MYO5A/HTT/GSTO1/DYSF/ANK2/CASQ1/FGF14/CBARP/STIMATE/CRACR2A                                                          |
| Biological Process | GO:0001885 | endothelial cell development                                 | 14/2279 | 64/18866  | 0.0188757 | 0.2365935 | 0.2140782 | 14 | PDE4D/TJP2/RAP1B/TNF/CCM2/TNFRSF1A/RAPGEF2/ENG/ADD1/S1PR2/NOTCH4/PPP1R16B/EZR/MYADM                                                                                  |
| Biological Process | GO:0051261 | protein depolymerization                                     | 22/2279 | 115/18866 | 0.0189028 | 0.2366209 | 0.214103  | 22 | VILL/GSN/CAPG/MICAL1/MICAL2/MICAL3/NAV3/TMOD3/SVIL/SH3GL1/WDR1/SPTA1/ADD1/MAP1A/AVIL/FLII/ARHGEF2/SPTAN1/ASPH/TMOD1/SPTBN4/SPEF1                                     |
| Biological Process | GO:0060996 | dendritic spine development                                  | 20/2279 | 102/18866 | 0.0190129 | 0.2373745 | 0.2147849 | 20 | ZMYND8/NCK2/EPHB3/ITSN1/DISC1/BAIAP2/ASAP1/WASL/IQSEC1/ARID1B/CPEB3/SIPA1L1/DOCK10/DNM3/DNM1L/MEF2C/SHANK2/UBE3A/CUX2/DBNL                                           |
| Biological Process | GO:0150115 | cell-substrate junction organization                         | 20/2279 | 102/18866 | 0.0190129 | 0.2373745 | 0.2147849 | 20 | COL17A1/ITGB1BP1/SMAD3/ARHGEF7/CTTN/DUSP22/WHAMM/THBS1/TNS1/ACTN1/PTPRJ/IQSEC1/TESK2/ACTG1/BCR/BCL2/CORO1C/DUSP3/LAMB3/DAPK3                                         |
| Biological Process | GO:0002886 | regulation of myeloid leukocyte mediated immunity            | 13/2279 | 58/18866  | 0.0191004 | 0.2376477 | 0.215032  | 13 | ABR/CD177/CCR2/GAB2/FGR/CD84/SPHK2/FER/BLK/BCR/ITGB2/DNASE1L3/PRAM1                                                                                                  |
| Biological Process | GO:0035306 | positive regulation of dephosphorylation                     | 13/2279 | 58/18866  | 0.0191004 | 0.2376477 | 0.215032  | 13 | SMAD3/GPLD1/CAMTA1/TGFB1/RIPK3/PTPRC/PPP2R5D/MEF2C/PDGFRB/PPP1R16B/CD33/ANKLE2/PTPA                                                                                  |
| Biological Process | GO:0006998 | nuclear envelope organization                                | 12/2279 | 52/18866  | 0.0191099 | 0.2376477 | 0.215032  | 12 | DCTN1/PRKCA/PRKCB/NUP93/PPP2R1A/NEK6/UBXN2A/TOR1B/NDEL1/ANKLE2/LPIN1/BANF1                                                                                           |
| Biological Process | GO:1903305 | regulation of regulated secretory pathway                    | 29/2279 | 162/18866 | 0.0191372 | 0.237677  | 0.2150586 | 29 | ABR/CD177/RAP1B/CCR2/GAB2/FGR/MICAL1/CD84/GIT1/RAB27A/GNAI2/HLA-F/APBA2/SPHK2/FER/PRKCB/VPS18/BLK/CHRM2/BCR/ITGB2/NOTCH1/P2RX1/DNM1L/PRAM1/SYT17/RPH3AL/DTNBP1/CBARP |

|                    |            |                                                                  |         |           |           |           |           |    |                                                                                                                                                                                                                                                                                                                                           |
|--------------------|------------|------------------------------------------------------------------|---------|-----------|-----------|-----------|-----------|----|-------------------------------------------------------------------------------------------------------------------------------------------------------------------------------------------------------------------------------------------------------------------------------------------------------------------------------------------|
| Biological Process | GO:2001021 | negative regulation of response to DNA damage stimulus           | 17/2279 | 83/18866  | 0.0195287 | 0.2422221 | 0.2191712 | 17 | RMI2/RTEL1/RECQL5/OTUB2/ZNF385A/CLU/OTUB1/BCL2/TP53BP1/CHEK2/TRIP12/ERCC1/BCL2L1/TFIP11/MARCHF7/CYREN/FBH1                                                                                                                                                                                                                                |
| Biological Process | GO:0048638 | regulation of developmental growth                               | 56/2279 | 353/18866 | 0.0197532 | 0.2426178 | 0.2195292 | 56 | SEMA6B/CPNE6/CTDP1/CREB1/MFSD2A/CTTN/DNM2/MIR199A1/COLQ/CPNE5/SH3PXD2B/BCL11A/VGLL4/SEMA4A/STAT5A/RTN4/TGFBR2/DISC1/SEMA4B/DLL1/RIPK1/APP/RBPJ/IFRD1/ILK/SMAD7/LATS2/FGFR1/SEMA4D/SMURF1/POR/GHRL/STK3/ACACB/CDH4/PLCB1/FTO/MEIS1/BCL2/MIR199A2/NOTCH1/RAI1/CDKL3/MEF2C/SYT17/NPPC/HLX/MBD5/CYFIP1/TRPV2/NDEL1/EZR/SPTBN4/DBNL/SPART/PRKN |
| Biological Process | GO:0001959 | regulation of cytokine-mediated signaling pathway                | 32/2279 | 183/18866 | 0.0198245 | 0.2426178 | 0.2195292 | 32 | GFI1/VRK2/PPARG/RUNX1/ANGPT1/IL1R1/TNF/TRAF2/TNFAIP3/CCL5/TRAF1/TRAIP/PADI2/RIPK1/PTPN6/MIR24-2/MIR27A/TNFRSF1A/CPNE1/JAK1/IL1RN/NR1H2/PTPRC/NLRC5/IRAK2/SLIT3/ELF1/CASP1/CYLD/PARP9/FADD/PRKN                                                                                                                                            |
| Biological Process | GO:0043433 | negative regulation of DNA-binding transcription factor activity | 32/2279 | 183/18866 | 0.0198245 | 0.2426178 | 0.2195292 | 32 | HDAC4/GFI1/IL10/AIM2/WWP2/PRMT2/NLRP3/ARRB1/SUFU/TNFAIP3/MIR101-2/TLR9/TRAIP/MIR27A/TCF7L2/SMAD7/MTURN/MED13/NLRC5/CAT/ARRB2/MIR138-2/IRAK2/RB1/SP100/TRIB1/CYLD/PARP10/PELI1/COMMD6/PAXIP1/ADGRG3                                                                                                                                        |
| Biological Process | GO:1903034 | regulation of response to wounding                               | 32/2279 | 183/18866 | 0.0198245 | 0.2426178 | 0.2195292 | 32 | RREB1/PLAU/IL10/CD9/KANK1/MYLK/SMAD3/PRKCA/TNF/UBASH3B/TNFAIP3/SERPINB2/THBS1/MYH9/F12/KREMEN1/STK24/BLK/ACTG1/GRN/PDGFB/NFE2L2/PRKCE/CPB2/F2R/ANO6/ADTRP/CERS2/NDEL1/INPP5F/PLPP3/CCN4                                                                                                                                                   |
| Biological Process | GO:0090630 | activation of GTPase activity                                    | 21/2279 | 109/18866 | 0.0199352 | 0.2426178 | 0.2195292 | 21 | ARHGEF10/ABR/TBC1D16/RHOG/TBC1D2/TBC1D10A/RABGAP1L/TBC1D22B/USP6NL/BCR/SIPA1L1/ARHGAP25/TBC1D14/TBC1D2B/SGSM2/CORO1C/TBC1D1/ARHGEF15/NDEL1/TBC1D22A/ARHGAP45                                                                                                                                                                              |
| Biological Process | GO:0032469 | endoplasmic reticulum calcium ion homeostasis                    | 7/2279  | 24/18866  | 0.0200349 | 0.2426178 | 0.2195292 | 7  | THADA/PACS2/ITPR1/APP/FIS1/BCL2/GRINA                                                                                                                                                                                                                                                                                                     |
| Biological Process | GO:0034123 | positive regulation of toll-like receptor signaling pathway      | 7/2279  | 24/18866  | 0.0200349 | 0.2426178 | 0.2195292 | 7  | TLR9/RTN4/TREML4/WDFY1/LTF/FLOT1/PELI1                                                                                                                                                                                                                                                                                                    |
| Biological Process | GO:0051004 | regulation of lipoprotein lipase activity                        | 7/2279  | 24/18866  | 0.0200349 | 0.2426178 | 0.2195292 | 7  | LIPC/PCSK6/NR1H2/SORT1/LMF1/ABHD5/ANGPTL8                                                                                                                                                                                                                                                                                                 |

|                    |            |                                                                         |         |           |           |           |           |    |                                                                                                                                                                                                                                                                         |
|--------------------|------------|-------------------------------------------------------------------------|---------|-----------|-----------|-----------|-----------|----|-------------------------------------------------------------------------------------------------------------------------------------------------------------------------------------------------------------------------------------------------------------------------|
| Biological Process | GO:0051896 | regulation of protein kinase B signaling                                | 42/2279 | 253/18866 | 0.0200356 | 0.2426178 | 0.2195292 | 42 | TGFA/PIK3CD/LCK/MIR143/MIR145/CHI3L1/ANGPT1/PIK3AP1/ITGB1BP1/PIK3R1/RHOG/MIR199A1/TNF/PHLPP1/ITSN1/RTN4/THBS1/PIK3R5/TCF7L2/ILK/CPNE1/IGF1R/FGFR1/TGFB1/PHB/PTPRJ/PPP2R5C/CSF3/STK3/PDGFB/ENG/ARRB2/MIR138-2/NTRK1/MIR199A2/GCNT2/BANK1/TSC2/PDGFRB/INPP5F/CX3CR1/MYORG |
| Biological Process | GO:0003413 | chondrocyte differentiation involved in endochondral bone morphogenesis | 5/2279  | 14/18866  | 0.0200458 | 0.2426178 | 0.2195292 | 5  | ANXA6/TGFBR2/POC1A/RARG/NPPC                                                                                                                                                                                                                                            |
| Biological Process | GO:0014854 | response to inactivity                                                  | 5/2279  | 14/18866  | 0.0200458 | 0.2426178 | 0.2195292 | 5  | HDAC4/IL10/CAT/PKM/CASQ1                                                                                                                                                                                                                                                |
| Biological Process | GO:0032933 | SREBP signaling pathway                                                 | 5/2279  | 14/18866  | 0.0200458 | 0.2426178 | 0.2195292 | 5  | AMFR/ZBTB7B/ARHGEF10L/SREBF1/SPRING1                                                                                                                                                                                                                                    |
| Biological Process | GO:0040034 | regulation of development, heterochronic                                | 5/2279  | 14/18866  | 0.0200458 | 0.2426178 | 0.2195292 | 5  | DLL1/RBPJ/NOTCH1/NODAL/HES3                                                                                                                                                                                                                                             |
| Biological Process | GO:0050872 | white fat cell differentiation                                          | 5/2279  | 14/18866  | 0.0200458 | 0.2426178 | 0.2195292 | 5  | PPARG/CTBP1/CTBP2/PRDM16/PER2                                                                                                                                                                                                                                           |
| Biological Process | GO:1900239 | regulation of phenotypic switching                                      | 5/2279  | 14/18866  | 0.0200458 | 0.2426178 | 0.2195292 | 5  | MIR140/MIR143/MIR145/PDGFB/DNMT1                                                                                                                                                                                                                                        |
| Biological Process | GO:1902101 | positive regulation of metaphase/anaphase transition of cell cycle      | 5/2279  | 14/18866  | 0.0200458 | 0.2426178 | 0.2195292 | 5  | NSMCE2/CUL3/CDC16/RB1/ANAPC7                                                                                                                                                                                                                                            |
| Biological Process | GO:1903054 | negative regulation of extracellular matrix organization                | 5/2279  | 14/18866  | 0.0200458 | 0.2426178 | 0.2195292 | 5  | TNFRSF1B/TNFRSF1A/TGFB1/NOTCH1/ADTRP                                                                                                                                                                                                                                    |

|                    |            |                                                           |         |           |           |           |           |    |                                                                                                                                                                                                                                                                                         |
|--------------------|------------|-----------------------------------------------------------|---------|-----------|-----------|-----------|-----------|----|-----------------------------------------------------------------------------------------------------------------------------------------------------------------------------------------------------------------------------------------------------------------------------------------|
| Biological Process | GO:1904152 | regulation of retrograde protein transport, ER to cytosol | 5/2279  | 14/18866  | 0.0200458 | 0.2426178 | 0.2195292 | 5  | UBAC2/EDEM1/DERL2/EDEM2/SVIP                                                                                                                                                                                                                                                            |
| Biological Process | GO:1904748 | regulation of apoptotic process involved in development   | 5/2279  | 14/18866  | 0.0200458 | 0.2426178 | 0.2195292 | 5  | TNFRSF1B/VDR/TNFRSF1A/PAX2/NOTCH1                                                                                                                                                                                                                                                       |
| Biological Process | GO:0050679 | positive regulation of epithelial cell proliferation      | 36/2279 | 211/18866 | 0.020218  | 0.2443906 | 0.2211333 | 36 | LRG1/RPTOR/RREB1/NRP2/TGFA/IL10/PRKCA/TNFAIP3/EGFL7/CCL5/MIR101-2/STAT5A/RTN4/C5AR2/AKT3/MIR27A/MIR23A/TCF7L2/PAX2/CDH3/FGFR1/ZNF580/NF1/ITGB3/GHRL/GRN/PDGFB/NOD2/NOTCH1/AGTR1/DYSF/PPP1R16B/TNFSF12/PLCG1/NODAL/JAML                                                                  |
| Biological Process | GO:0005996 | monosaccharide metabolic process                          | 48/2279 | 296/18866 | 0.0203955 | 0.2459494 | 0.2225437 | 48 | MAEA/FUT4/FOXK1/ENO1/FUT7/HK1/C1QTNF3/PFKFB4/GPLD1/TNF/PGP/CHST15/ADPGK/PGAM1/GLYCTK/PC/NISCH/DGKQ/ENO3/DYRK2/HK2/GHRL/GNB3/ACACB/PPP1CB/PMM2/ESRRB/PER2/PKM/GSTO1/PRKCE/PCK2/SLC2A1/FOXO1/NCOA2/MAN2C1/SOGA1/KBTBD2/WBTC1/CPT1A/PFKFB3/GSTO2/SLC25A1/SLC23A1/PRKAA1/PRKN/SDHAF3/RUBCNL |
| Biological Process | GO:0071312 | cellular response to alkaloid                             | 9/2279  | 35/18866  | 0.0204246 | 0.2459494 | 0.2225437 | 9  | BLM/SPIDR/CASQ2/SLC8A1/RECQL5/DDC/CRHBP/CASP7/BCL2L1                                                                                                                                                                                                                                    |
| Biological Process | GO:1901223 | negative regulation of NIK/NF-kappaB signaling            | 9/2279  | 35/18866  | 0.0204246 | 0.2459494 | 0.2225437 | 9  | C1QTNF3/HDAC7/NLRP3/CPNE1/LITAF/CYLD/RELA/FBXW11/ADGRG3                                                                                                                                                                                                                                 |
| Biological Process | GO:0006665 | sphingolipid metabolic process                            | 29/2279 | 163/18866 | 0.0206754 | 0.2465022 | 0.2230439 | 29 | PLA2G15/FUT7/SPTLC2/HEXB/GALC/TNF/SMPDL3B/ORMDL3/CERS6/TNFRSF1A/SPHK2/SGMS1/ST8SIA6/PPP2R1A/SGMS2/B4GALT3/TEX2/SGPP1/SGPP2/P2RX1/FA2H/ESYT1/CERS2/PDXDC1/CERK/SIRT3/PRKAA1/TLCD3B/PLPP3                                                                                                 |
| Biological Process | GO:0015749 | monosaccharide transmembrane transport                    | 22/2279 | 116/18866 | 0.0207484 | 0.2465022 | 0.2230439 | 22 | PRKAG2/SLC2A5/MIR143/PIK3R1/SLC2A14/TNF/GRB10/SLC2A9/ZDHHC7/HNF1A/PRKCB/SLC1A2/HK2/PRKCI/NFE2L2/SORT1/SLC5A10/SLC2A1/RTN2/ASPSCR1/CLTCL1/SLC23A1                                                                                                                                        |
| Biological Process | GO:0030518 | intracellular steroid hormone receptor signaling pathway  | 22/2279 | 116/18866 | 0.0207484 | 0.2465022 | 0.2230439 | 22 | FOXP1/CALR/NCOR2/RUNX1/YWHAH/PRMT2/LBH/PADI2/ZNF366/HDAC1/ZMIZ1/PHB/AXIN1/KMT2D/ARRB2/ARNTL/PER1/UBE3A/NEDD4/RNF14/NCOA4/NODAL                                                                                                                                                          |



|                    |            |                                                                        |        |          |           |           |           |   |                                          |
|--------------------|------------|------------------------------------------------------------------------|--------|----------|-----------|-----------|-----------|---|------------------------------------------|
| Biological Process | GO:0002076 | osteoblast development                                                 | 6/2279 | 19/18866 | 0.0207818 | 0.2465022 | 0.2230439 | 6 | HDAC4/LRP5L/SMAD3/CLECSA/LIMD1/RUNX2     |
| Biological Process | GO:0007213 | G protein-coupled acetylcholine receptor signaling pathway             | 6/2279 | 19/18866 | 0.0207818 | 0.2465022 | 0.2230439 | 6 | GNAI2/GNA11/CHRM2/PLCB1/RGS10/GRK2       |
| Biological Process | GO:0071800 | podosome assembly                                                      | 6/2279 | 19/18866 | 0.0207818 | 0.2465022 | 0.2230439 | 6 | GSN/TNF/SH3PXD2B/ASAP1/ARHGEF2/DBNL      |
| Biological Process | GO:0090026 | positive regulation of monocyte chemotaxis                             | 6/2279 | 19/18866 | 0.0207818 | 0.2465022 | 0.2230439 | 6 | CCR2/CCL5/FPR2/DEFB124/CXCL17/ANO6       |
| Biological Process | GO:0090153 | regulation of sphingolipid biosynthetic process                        | 6/2279 | 19/18866 | 0.0207818 | 0.2465022 | 0.2230439 | 6 | TNF/ORMDL3/TNFRSF1A/SPHK2/SIRT3/PRKAA1   |
| Biological Process | GO:0097320 | plasma membrane tubulation                                             | 6/2279 | 19/18866 | 0.0207818 | 0.2465022 | 0.2230439 | 6 | DNM2/WHAMM/PACSIN2/ASAP1/WASL/MICALL1    |
| Biological Process | GO:1905038 | regulation of membrane lipid metabolic process                         | 6/2279 | 19/18866 | 0.0207818 | 0.2465022 | 0.2230439 | 6 | TNF/ORMDL3/TNFRSF1A/SPHK2/SIRT3/PRKAA1   |
| Biological Process | GO:1905288 | vascular associated smooth muscle cell apoptotic process               | 6/2279 | 19/18866 | 0.0207818 | 0.2465022 | 0.2230439 | 6 | PPARG/MIR140/E2F3/MIR24-2/MIR138-2/DNMT1 |
| Biological Process | GO:1905459 | regulation of vascular associated smooth muscle cell apoptotic process | 6/2279 | 19/18866 | 0.0207818 | 0.2465022 | 0.2230439 | 6 | PPARG/MIR140/E2F3/MIR24-2/MIR138-2/DNMT1 |

|                    |            |                                                    |         |           |           |           |           |    |                                                                                                                                                                                                                                                                                                                                                                                                     |
|--------------------|------------|----------------------------------------------------|---------|-----------|-----------|-----------|-----------|----|-----------------------------------------------------------------------------------------------------------------------------------------------------------------------------------------------------------------------------------------------------------------------------------------------------------------------------------------------------------------------------------------------------|
| Biological Process | GO:0018205 | peptidyl-lysine modification                       | 63/2279 | 405/18866 | 0.0208122 | 0.246555  | 0.2230917 | 63 | HDAC4/GFI1/BRD4/SRCAP/TOLLIP/METTL21A/MYB/BRCA2/ASH2L/SETD2/RAE1/KANSL1/ARRB1/NSMCE2/LOXL3/BCL11A/SMYD3/BRD1/EHMT2/EPC1/RPS6KA4/TAF10/ZMIZ1/WDR82/KANSL2/SPHK2/KMT2D/CTBP1/POR/RNF212/NUP93/KDM4C/SETD1B/NCOA1/SETD1A/CREBBP/RSF1/TET2/ZNF335/METTL22/PRDM16/PHF19/PER1/DNMT1/PIH1D1/RUVBL1/RELA/KAT7/DYDC2/DYDC1/LOXL4/ING5/MECOM/LIF/SIRT3/PAXIP1/PRKAA1/P3H3/EEF1AKMT3/EEF1AKMT2/NSD3/NSD2/CSKMT |
| Biological Process | GO:0002292 | T cell differentiation involved in immune response | 15/2279 | 71/18866  | 0.0209095 | 0.2470909 | 0.2235766 | 15 | IL27/PRKCZ/ZFPM1/FOXP1/MYB/NLRP3/LOXL3/SEMA4A/SMAD7/LY9/ZBTB7B/RARA/IL18R1/HLX/BCL3                                                                                                                                                                                                                                                                                                                 |
| Biological Process | GO:1901880 | negative regulation of protein depolymerization    | 15/2279 | 71/18866  | 0.0209095 | 0.2470909 | 0.2235766 | 15 | VILL/GSN/CAPG/NAV3/TMOD3/SVIL/SPTA1/ADD1/AVIL/FLII/ARHGEF2/SPTAN1/TMOD1/SPTBN4/SPEF1                                                                                                                                                                                                                                                                                                                |
| Biological Process | GO:0045926 | negative regulation of growth                      | 42/2279 | 254/18866 | 0.0212867 | 0.2512365 | 0.2273277 | 42 | SEMA6B/CDA/ENO1/PPARG/CTDP1/SERTAD2/APBB2/SMAD3/MIR199A1/BCL11A/VGLL4/SEMA4A/RTN4/TGFBR2/MEG3/SEMA4B/RIPK1/SMARCA2/IFRD1/WNT11/SPHK2/TGFB1/PHB/PTPRJ/SEMA4D/RERG/CDHR2/STK3/SH3BP4/PPP2R1A/RB1/MEIS1/BCL2/MIR199A2/NOTCH1/RAI1/CDKL3/SLIT3/SCGB3A1/ING5/INHBA/SPART                                                                                                                                 |
| Biological Process | GO:0090181 | regulation of cholesterol metabolic process        | 14/2279 | 65/18866  | 0.0214641 | 0.2525387 | 0.228506  | 14 | IDI1/MBTPS1/ABCG1/DGKQ/POR/GNB3/ACACB/ACACA/LMF1/HMGCS1/SCD/SREBF1/ACADVL/PRKAA1                                                                                                                                                                                                                                                                                                                    |
| Biological Process | GO:0070663 | regulation of leukocyte proliferation              | 40/2279 | 240/18866 | 0.0214745 | 0.2525387 | 0.228506  | 40 | HLA-<br>DMB/IL27/IL10/MAD1L1/CD55/INPP5D/TNFRSF1B/CCR2/TNFAIP3/CCL5/CSF1R/NCK2/SFTPD/NFATC2/TNFSF13B/TLR9/MNDA/TGFBR2/PTPN6/TNFRSF21/ZBTB7B/RIPK3/BLK/CCDC88B/PTPRC/CD320/SPTA1/ZNF335/PNP/BCL2/MEF2C/CEBPB/HHEX/SLC7A1/FADD/PELI1/VAV3/TMEM131L/VSIR/MARCHF7                                                                                                                                       |
| Biological Process | GO:0089718 | amino acid import across plasma membrane           | 10/2279 | 41/18866  | 0.0214768 | 0.2525387 | 0.228506  | 10 | SLC1A5/SLC43A2/SLC1A2/SLC7A5/SLC1A6/PER2/SLC1A3/SLC43A1/SLC7A8/SLC7A1                                                                                                                                                                                                                                                                                                                               |
| Biological Process | GO:0044706 | multi-multicellular organism process               | 38/2279 | 226/18866 | 0.0215873 | 0.253486  | 0.2293631 | 38 | KLF1/BSG/RXRA/CALR/FUT7/HEXB/LNPEP/ARHGDI1/VDR/SH3PX2/ABCC2/PNOC/TGFBR2/COMT/AGO2/SPHK2/CRHBP/SLC19A1/RARA/SP3/DAZAP1/GHRL/CTSB/ETS1/ARNTL/BCL2/P2RX1/VMP1/TPPP3/STOX2/TMED2/SLC2A1/DHODH/HSD11B2/NODAL/LIF/PRLHR/PSG2                                                                                                                                                                              |
| Biological Process | GO:0050670 | regulation of lymphocyte proliferation             | 37/2279 | 219/18866 | 0.0216107 | 0.253486  | 0.2293631 | 37 | HLA-<br>DMB/IL27/IL10/MAD1L1/CD55/INPP5D/TNFRSF1B/CCR2/CCL5/NCK2/SFTPD/NFATC2/TNFSF13B/TLR9/MNDA/TGFBR2/PTPN6/TNFRSF21/ZBTB7B/RIPK3/BLK/CCDC88B/PTPRC/CD320/SPTA1/ZNF335/PNP/BCL2/MEF2C/CEBPB/SLC7A1/FADD/PELI1/VAV3/TMEM131L/VSIR/MARCHF7                                                                                                                                                          |

|                    |            |                                                        |         |           |           |           |           |    |                                                                                                                                                                                                                                                                    |
|--------------------|------------|--------------------------------------------------------|---------|-----------|-----------|-----------|-----------|----|--------------------------------------------------------------------------------------------------------------------------------------------------------------------------------------------------------------------------------------------------------------------|
| Biological Process | GO:0090263 | positive regulation of canonical Wnt signaling pathway | 27/2279 | 150/18866 | 0.0216797 | 0.253981  | 0.229811  | 27 | RNF220/KANK1/CSNK1D/TNKS/MIR145/SMAD3/FAM53B/JUP/RBPJ/ILK/CDH3/TGFB1/AXIN1/LRRK1/CSNK1E/PSMF1/ARNTL/PSMB7/TTC21B/ZBED3/RUVBL1/ZBED2/PPM1N/GID8/DA<br>PK3/PSMD13/ADGRA2                                                                                             |
| Biological Process | GO:0032387 | negative regulation of intracellular transport         | 13/2279 | 59/18866  | 0.0218709 | 0.2559057 | 0.2315526 | 13 | KCNE1/ANGPT1/ITGB1BP1/SUFU/UBAC2/SNX3/DERL2/CNIH2/NF1/CABP1/SP100/ARHGAP1/SVIP                                                                                                                                                                                     |
| Biological Process | GO:1904659 | glucose transmembrane transport                        | 21/2279 | 110/18866 | 0.0219228 | 0.2561969 | 0.231816  | 21 | PRKAG2/SLC2A5/MIR143/PIK3R1/SLC2A14/TNF/GRB10/SLC2A9/ZDHHC7/HNF1A/PRKCB/SLC1A2/HK2/PRKCI/NFE2L2/SORT1/SLC5A10/SLC2A1/RTN2/ASPSCR1/CLTCL1                                                                                                                           |
| Biological Process | GO:0035722 | interleukin-12-mediated signaling pathway              | 11/2279 | 47/18866  | 0.0219745 | 0.2564866 | 0.2320782 | 11 | P4HB/IL10/RAP1B/SERPINB2/AIP/JAK1/PITPNA/PLCB1/RALA/CA1/GSTO1                                                                                                                                                                                                      |
| Biological Process | GO:0018023 | peptidyl-lysine trimethylation                         | 12/2279 | 53/18866  | 0.0220686 | 0.2568484 | 0.2324056 | 12 | BRD4/SETD2/WDR82/KMT2D/KDM4C/SETD1B/SETD1A/TET2/ZNF335/PIH1D1/NSD3/CSKMT                                                                                                                                                                                           |
| Biological Process | GO:0071320 | cellular response to cAMP                              | 12/2279 | 53/18866  | 0.0220686 | 0.2568484 | 0.2324056 | 12 | KCNE1/ITPR2/RAP1B/SLC8A1/APP/FDX1/CRHBP/RAPGEF2/AQP1/KCNQ1/EZR/AQP9                                                                                                                                                                                                |
| Biological Process | GO:0071674 | mononuclear cell migration                             | 19/2279 | 97/18866  | 0.0220866 | 0.2568484 | 0.2324056 | 19 | C3AR1/CCR2/TNF/CCL5/CSF1R/FPR2/THBS1/DEFB124/FLT1/PDGFD/CXCL17/CCL20/IL6R/PDGFB/PLCB1/ANO6/CCL27/CCL22/JAML                                                                                                                                                        |
| Biological Process | GO:1901293 | nucleoside phosphate biosynthetic process              | 44/2279 | 269/18866 | 0.0223    | 0.2590126 | 0.2343638 | 44 | PRKAG2/RCVRN/AMPD3/ENO1/NADK/ADCY2/ACSL1/ADCY9/NMNAT3/RRM2B/ACOT7/VPS9D1/TK2/ACSS1/SPHK2/TGFB1/SLC26A1/UCK2/ACACB/ACSS2/PNP/GUK1/ADCY4/MTHFD1<br>/PPCDC/PAPSS2/PKM/ACACA/ACSF3/AK2/AK5/NPPC/ACAT1/SCD/LHPP/DCTD/PARP10/DHODH/PARP9/SLC25A1/TK1/PANK4/IMPDH1/ATP5PD |
| Biological Process | GO:0030183 | B cell differentiation                                 | 25/2279 | 137/18866 | 0.0226154 | 0.2623553 | 0.2373884 | 25 | HDAC4/IL10/INPP5D/PIK3R1/LYL1/TLR9/DLL1/RBPJ/PTPN6/PTPRJ/CD79A/SP3/CMTM7/PTPRC/DOCK10/NTRK1/POU2F2/BCL2/TCF3/HHEX/CYLD/BCL3/INHBA/PCID2/ADGRG3                                                                                                                     |

|                    |            |                                                   |         |           |           |           |           |    |                                                                                                                                                                                                                                                                                                                                               |
|--------------------|------------|---------------------------------------------------|---------|-----------|-----------|-----------|-----------|----|-----------------------------------------------------------------------------------------------------------------------------------------------------------------------------------------------------------------------------------------------------------------------------------------------------------------------------------------------|
| Biological Process | GO:0043666 | regulation of phosphoprotein phosphatase activity | 22/2279 | 117/18866 | 0.0227308 | 0.2628717 | 0.2378556 | 22 | LMTK2/MGAT5/PPP1R1B/URI1/CABIN1/TNF/GNAI2/ELFN2/RCAN1/PHACTR2/PPP2R5C/HTT/PTPRC/PPP2R1A/PPP2R5E/PPP2R5D/PPP2R1B/PDGFRB/PPP1R16B/CD33/ANKLE2/PTPA                                                                                                                                                                                              |
| Biological Process | GO:0006884 | cell volume homeostasis                           | 8/2279  | 30/18866  | 0.0227706 | 0.2628717 | 0.2378556 | 8  | CLCN6/AQP1/GNB3/ADD1/ANO6/SLC12A1/SLC12A7/ANXA7                                                                                                                                                                                                                                                                                               |
| Biological Process | GO:0051125 | regulation of actin nucleation                    | 8/2279  | 30/18866  | 0.0227706 | 0.2628717 | 0.2378556 | 8  | TRIM27/GSN/WHAMM/WASL/GMFB/NCKAP1/CYFIP1/GMFG                                                                                                                                                                                                                                                                                                 |
| Biological Process | GO:0070723 | response to cholesterol                           | 8/2279  | 30/18866  | 0.0227706 | 0.2628717 | 0.2378556 | 8  | GPLD1/TGFBR2/TGFB1/MLC1/ABCA1/GRAMD1A/HMGCS1/INHBA                                                                                                                                                                                                                                                                                            |
| Biological Process | GO:0002456 | T cell mediated immunity                          | 20/2279 | 104/18866 | 0.0231403 | 0.2664918 | 0.2411312 | 20 | PRKCZ/FUT7/CD55/SLC11A1/TNFRSF1B/NLRP3/IL1R1/CCR2/TRAF2/DUSP22/CTSH/RAB27A/HLA-F/SMAD7/RIPK3/PTPRC/IL18RAP/IL18R1/FADD/CYRIB                                                                                                                                                                                                                  |
| Biological Process | GO:0043279 | response to alkaloid                              | 20/2279 | 104/18866 | 0.0231403 | 0.2664918 | 0.2411312 | 20 | BLM/SPIDR/PPARG/CASQ2/PPP1R1B/SLC8A1/DNM2/RECQL5/DDC/CRHBP/HTR3A/CASP7/PRKCE/UBE3A/BCL2L1/RELA/DHODH/HNMT/FADD/PRKAA1                                                                                                                                                                                                                         |
| Biological Process | GO:0034103 | regulation of tissue remodeling                   | 18/2279 | 91/18866  | 0.0231903 | 0.2667448 | 0.2413602 | 18 | ABR/DEF8/MIR143/INPP5D/VDR/PRKCA/MIR199A1/UBASH3B/TNFAIP3/CSF1R/TGFB1/NF1/ITGB3/TMEM64/CSK/BCR/PLEKHM1/MIR199A2                                                                                                                                                                                                                               |
| Biological Process | GO:1904062 | regulation of cation transmembrane transport      | 55/2279 | 349/18866 | 0.023296  | 0.2676368 | 0.2421673 | 55 | PDE4D/KCNE1/KCNAB2/THADA/CASQ2/WWP2/FXYD2/CACNA1C/YWHAH/FXYD1/CCR2/SLC8A1/DNM2/UBASH3B/TLR9/TESC/BIN1/JSRP1/AHNAK/APP/NOS1AP/PTPN6/ACTN4/KCNIP1/P2RY6/SPHK2/CRHBP/SLC43A2/CNIH2/MYO5A/HTT/CAB39/SNTA1/MAPK8IP2/KCNQ1/GSG1L/GSTO1/MEF2C/SHANK2/PRKCE/F2R/TMC1/SLC43A1/NEDD4/ANO6/DYSF/ANK2/HECW2/PLCG1/PDZK1/CASQ1/FGF14/CBARP/STIMATE/CRACR2A |
| Biological Process | GO:0061035 | regulation of cartilage development               | 15/2279 | 72/18866  | 0.0235551 | 0.270116  | 0.2444106 | 15 | SMAD3/ZBTB16/SMAD7/WNT11/RARA/POR/RARG/BMPRI1B/RUNX2/TRPS1/GDF6/RELA/ZNF219/RFLNA/CCN4                                                                                                                                                                                                                                                        |

|                    |            |                                                  |         |           |           |           |           |    |                                                                                                                                                                                                                                                                                                                                                                                                               |
|--------------------|------------|--------------------------------------------------|---------|-----------|-----------|-----------|-----------|----|---------------------------------------------------------------------------------------------------------------------------------------------------------------------------------------------------------------------------------------------------------------------------------------------------------------------------------------------------------------------------------------------------------------|
| Biological Process | GO:0006869 | lipid transport                                  | 61/2279 | 393/18866 | 0.0235687 | 0.270116  | 0.2444106 | 61 | PRKAG2/OSBPL5/RXRA/PPARG/SLC51A/ACSL1/ABCC1/SLC10A1/MFSD2A/MYB/MAP2K6/TMEM30A/LIPC/ABCG1/ATP8A1/ABCC2/HDLBP/ANO7/PLTP/THBS1/PITPNM2/STARD6/ATP11A/ATP8B1/PITPNM1/MIR27A/OSBPL6/CLU/PITPNA/SLCO3A1/NR1H2/LRP10/ITGB3/GHRL/PCTP/ABCA1/NCOA1/ACACB/FABP6/OSBPL10/TEX2/ABCC3/ATP8B4/NPC1/SGPP1/SPNS3/ACACA/PDZD8/PITPNC1/AGTR1/SLC2A1/ANO6/NCOA2/GRAMD1A/ESYT1/CPT1A/INHBA/VPS51/C2CD2L/AQP9/PRKN                 |
| Biological Process | GO:0009101 | glycoprotein biosynthetic process                | 54/2279 | 342/18866 | 0.023604  | 0.2701946 | 0.2444816 | 54 | CSGALNACT1/FUT4/GALNT2/FUT7/RPN1/XXYLT1/HS3ST3B1/DSE/SLC35C2/MGAT5/ST6GALNAC1/GALNT12/CHSY1/MGAT4A/MIR101-2/CHST11/MGAT3/CHST15/NDST1/TCF7L2/MUC12/ASGR2/AGO2/XYL1/GXYLT2/B4GALT7/POMT2/MUC20/B3GNT5/ST6GAL1/TNIP1/ITM2C/BMPR1B/ST8SIA6/ST3GAL4/PLCB1/TET2/B4GALT3/PMM2/NPC1/BCL2/GALNT9/FUT11/GCNT2/GFPT2/LMF1/ALG11/PHLDA1/MAN1C1/DPAGT1/ST3GAL2/B3GNT2/B4GAT1/PXYLP1                                       |
| Biological Process | GO:0044282 | small molecule catabolic process                 | 69/2279 | 452/18866 | 0.0237506 | 0.2715451 | 0.2457037 | 69 | FUT4/FOXK1/CDA/ACAD8/DPYS/PLA2G15/SYNJ2/ENO1/HAL/FUT7/NAGK/HK1/ENTPD1/MFSD2A/HEXB/INPP5A/GADL1/AMDHD2/BDH1/HGD/ABHD16A/AMACR/NPL/ALDH2/CBS/ACOXL/AKR1D1/MTHFS/OGDH/NUDT3/ADPGK/ALDH4A1/ENOSF1/PGAM1/GLYCK/FAH/TGFB1/CYP4F3/STAB2/ACADM/SULT1A2/HIBADH/ENO3/AGXT/HK2/ACACB/INPP5E/UPB1/IMP2/PNP/ACOX2/LYVE1/HOGA1/ADO/BCKDHA/PKM/ACSF3/MAT1A/HMGCL/PCK2/CRYM/ACAT1/ADTRP/CPT1A/LPIN1/HNMT/LYPLA2/ACADVL/CEMIP2 |
| Biological Process | GO:0060402 | calcium ion transport into cytosol               | 28/2279 | 158/18866 | 0.0237799 | 0.2715536 | 0.2457114 | 28 | TRPM2/PDE4D/CASQ2/ITPR2/LCK/CACNA1C/SLC8A1/UBASH3B/ITPR1/JSRP1/PTPN6/RASA3/P2RY6/MYO5A/HTT/PTPRC/NOL3/TPCN2/BCL2/GSTO1/PRKCE/F2R/ANK2/CHERP/PLCG1/P2RX5/TRPV2/CASQ1                                                                                                                                                                                                                                           |
| Biological Process | GO:0006352 | DNA-templated transcription, initiation          | 41/2279 | 249/18866 | 0.0241306 | 0.2722976 | 0.2463846 | 41 | RXRA/TAF1C/MAML3/PPARG/NR1I2/CREB1/MAML1/VDR/E2F3/MAML2/POLR2F/CRCP/RBPJ/TAF10/HNF1A/RARA/MED13/NR1H2/WWTR1/ATF7IP/RARG/RUNX2/BRF1/CREBBP/RSF1/CCNH/ESRRB/MED8/NOTCH1/PIH1D1/MED25/SUB1/NOTCH4/TAF1D/MORC1/ERCC1/TEAD2/NR5A2/XPA/ERCC2/PAXIP1                                                                                                                                                                 |
| Biological Process | GO:0034394 | protein localization to cell surface             | 14/2279 | 66/18866  | 0.0243097 | 0.2722976 | 0.2463846 | 14 | KCNAB2/TM9SF4/CD177/ANGPT1/PIGU/TNF/WNT11/SMURF1/FCN1/JAM3/ASTN2/MAP1A/ANK2/PTPRU                                                                                                                                                                                                                                                                                                                             |
| Biological Process | GO:0046626 | regulation of insulin receptor signaling pathway | 14/2279 | 66/18866  | 0.0243097 | 0.2722976 | 0.2463846 | 14 | PRKCZ/SORL1/FUT7/KANK1/PTPRE/PIK3R1/BAIAP2L1/GRB10/GNAI2/ZBTB7B/PRKCB/TSC2/RELA/PRKAA1                                                                                                                                                                                                                                                                                                                        |
| Biological Process | GO:0045622 | regulation of T-helper cell differentiation      | 9/2279  | 36/18866  | 0.0243977 | 0.2722976 | 0.2463846 | 9  | IL27/PRKCZ/MYB/NLRP3/LOXL3/SMAD7/ZBTB7B/RARA/HLX                                                                                                                                                                                                                                                                                                                                                              |
| Biological Process | GO:0045738 | negative regulation of DNA repair                | 9/2279  | 36/18866  | 0.0243977 | 0.2722976 | 0.2463846 | 9  | RM12/RECL5/OTUB2/OTUB1/TP53BP1/TRIP12/TFIP11/CYREN/FBH1                                                                                                                                                                                                                                                                                                                                                       |

|                    |            |                                                            |        |          |           |           |           |   |                                                          |
|--------------------|------------|------------------------------------------------------------|--------|----------|-----------|-----------|-----------|---|----------------------------------------------------------|
| Biological Process | GO:0097484 | dendrite extension                                         | 9/2279 | 36/18866 | 0.0243977 | 0.2722976 | 0.2463846 | 9 | CPNE6/CPNE5/CYFIP2/BCL11A/SMURF1/CDKL3/SYT17/CYFIP1/PRKN |
| Biological Process | GO:0001865 | NK T cell differentiation                                  | 4/2279 | 10/18866 | 0.0244469 | 0.2722976 | 0.2463846 | 4 | ZBTB16/TGFBR2/ZBTB7B/AP3D1                               |
| Biological Process | GO:0002676 | regulation of chronic inflammatory response                | 4/2279 | 10/18866 | 0.0244469 | 0.2722976 | 0.2463846 | 4 | IL10/TNF/TNFAIP3/CCL5                                    |
| Biological Process | GO:0002887 | negative regulation of myeloid leukocyte mediated immunity | 4/2279 | 10/18866 | 0.0244469 | 0.2722976 | 0.2463846 | 4 | ABR/CCR2/CD84/BCR                                        |
| Biological Process | GO:0002934 | desmosome organization                                     | 4/2279 | 10/18866 | 0.0244469 | 0.2722976 | 0.2463846 | 4 | PRKCA/JUP/PERP/NECTIN1                                   |
| Biological Process | GO:0003376 | sphingosine-1-phosphate receptor signaling pathway         | 4/2279 | 10/18866 | 0.0244469 | 0.2722976 | 0.2463846 | 4 | SPHK2/S1PR2/S1PR4/EZR                                    |
| Biological Process | GO:0010887 | negative regulation of cholesterol storage                 | 4/2279 | 10/18866 | 0.0244469 | 0.2722976 | 0.2463846 | 4 | PPARG/ABCG1/NR1H2/ABCA1                                  |
| Biological Process | GO:0015937 | coenzyme A biosynthetic process                            | 4/2279 | 10/18866 | 0.0244469 | 0.2722976 | 0.2463846 | 4 | ACOT7/PPCDC/ACAT1/PANK4                                  |
| Biological Process | GO:0044857 | plasma membrane raft organization                          | 4/2279 | 10/18866 | 0.0244469 | 0.2722976 | 0.2463846 | 4 | PACSIN2/MIR138-2/FA2H/FLOT1                              |

|                    |            |                                                        |         |           |           |           |           |    |                                                                                                                                                                                              |
|--------------------|------------|--------------------------------------------------------|---------|-----------|-----------|-----------|-----------|----|----------------------------------------------------------------------------------------------------------------------------------------------------------------------------------------------|
| Biological Process | GO:0070327 | thyroid hormone transport                              | 4/2279  | 10/18866  | 0.0244469 | 0.2722976 | 0.2463846 | 4  | ABCC2/SLC7A5/CRYM/SLC7A8                                                                                                                                                                     |
| Biological Process | GO:0070341 | fat cell proliferation                                 | 4/2279  | 10/18866  | 0.0244469 | 0.2722976 | 0.2463846 | 4  | TFDP1/E2F3/FTO/PER2                                                                                                                                                                          |
| Biological Process | GO:0070344 | regulation of fat cell proliferation                   | 4/2279  | 10/18866  | 0.0244469 | 0.2722976 | 0.2463846 | 4  | TFDP1/E2F3/FTO/PER2                                                                                                                                                                          |
| Biological Process | GO:0070544 | histone H3-K36 demethylation                           | 4/2279  | 10/18866  | 0.0244469 | 0.2722976 | 0.2463846 | 4  | KDM4B/KDM2A/KDM4C/KDM7A                                                                                                                                                                      |
| Biological Process | GO:0070942 | neutrophil mediated cytotoxicity                       | 4/2279  | 10/18866  | 0.0244469 | 0.2722976 | 0.2463846 | 4  | AZU1/ELANE/CTSG/DNASE1L3                                                                                                                                                                     |
| Biological Process | GO:0090527 | actin filament reorganization                          | 4/2279  | 10/18866  | 0.0244469 | 0.2722976 | 0.2463846 | 4  | GSN/WHAMM/ARAP1/CASS4                                                                                                                                                                        |
| Biological Process | GO:2000659 | regulation of interleukin-1-mediated signaling pathway | 4/2279  | 10/18866  | 0.0244469 | 0.2722976 | 0.2463846 | 4  | VRK2/IL1R1/MIR27A/IL1RN                                                                                                                                                                      |
| Biological Process | GO:0009260 | ribonucleotide biosynthetic process                    | 32/2279 | 186/18866 | 0.024526  | 0.272299  | 0.2463858 | 32 | PRKAG2/AMPD3/ENO1/ADCY2/ACSL1/ADCY9/ACOT7/VPS9D1/ACSS1/SPHK2/TGFB1/SLC26A1/UCK2/ACACB/ACSS2/GUK1/ADCY4/PPCDC/PAPSS2/PKM/ACACA/ACSF3/AK2/AK5/NPPC/ACAT1/SCD/DHODH/SLC25A1/PANK4/IMPDH1/ATP5PD |
| Biological Process | GO:0002705 | positive regulation of leukocyte mediated immunity     | 25/2279 | 138/18866 | 0.0245523 | 0.272299  | 0.2463858 | 25 | PRKCZ/CD177/NLRP3/IL1R1/GAB2/FGR/TNF/TRAF2/CD226/HLA-F/SCIMP/SPHK2/TGFB1/PTPRC/ITGB2/IL18RAP/NOD2/TP53BP1/IL18R1/TNFSF13/CADM1/FADD/PAXIP1/CYRIB/NSD2                                        |

|                    |            |                                                               |         |           |           |          |           |    |                                                                                                                                                                                                                                           |
|--------------------|------------|---------------------------------------------------------------|---------|-----------|-----------|----------|-----------|----|-------------------------------------------------------------------------------------------------------------------------------------------------------------------------------------------------------------------------------------------|
| Biological Process | GO:0032944 | regulation of mononuclear cell proliferation                  | 37/2279 | 221/18866 | 0.0245665 | 0.272299 | 0.2463858 | 37 | HLA-<br>DMB/IL27/IL10/MAD1L1/CD55/INPP5D/TNFRSF1B/CCR2/CCL5/NCK2/SFTPD/NFATC2/TNFSF13B/TLR9/MNDA/TGFBR2/PTPN6/TNFRSF21/ZBTB7B/RIPK3/BLK/CCDC88B/PTPRC/CD320/SPTA1/ZNF335/PNP/BCL2/MEF2C/CEBPB/SLC7A1/FADD/PEL1/VAV3/TMEM131L/VSIR/MARCHF7 |
| Biological Process | GO:0002793 | positive regulation of peptide secretion                      | 33/2279 | 193/18866 | 0.024601  | 0.272299 | 0.2463858 | 33 | S100A8/SORL1/NADK/IL10/TTN/C1QTNF3/MYRIP/CLEC9A/FRMD4A/ARRB1/GPLD1/FGR/TNF/MYO18A/ABCG1/CLEC5A/ITSN1/TCF7L2/TGFB1/GIPR/BLK/NR1H2/GHRL/MYOM1/DNM1L/PRKCE/ANKRD1/CADM1/CD33/RPH3AL/EZR/C2CD2L/SIRT3                                         |
| Biological Process | GO:0034219 | carbohydrate transmembrane transport                          | 22/2279 | 118/18866 | 0.0248559 | 0.272299 | 0.2463858 | 22 | PRKAG2/SLC2A5/MIR143/PIK3R1/SLC2A14/TNF/GRB10/SLC2A9/ZDHHC7/HNF1A/PRKCB/SLC1A2/HK2/PRKCI/NFE2L2/SORT1/SLC5A10/SLC2A1/RTN2/ASPSR1/CLTCL1/SLC23A1                                                                                           |
| Biological Process | GO:0050868 | negative regulation of T cell activation                      | 22/2279 | 118/18866 | 0.0248559 | 0.272299 | 0.2463858 | 22 | IL10/MAD1L1/RUNX1/LAX1/LOXL3/SFTPD/DUSP22/PTPN6/MIR27A/SMAD7/TNFRSF21/ZBTB7B/TIGIT/ZC3H8/DUSP3/HLX/CEBPB/RUNX3/PEL1/TMEM131L/VSIR/MARCHF7                                                                                                 |
| Biological Process | GO:0030865 | cortical cytoskeleton organization                            | 13/2279 | 60/18866  | 0.0249298 | 0.272299 | 0.2463858 | 13 | CALR/FMNL3/RHOH/RHOG/TNF/RHOF/FMNL1/RHOBTB2/EPB41L3/WDR1/NCKAP1/STRIP1/EZR                                                                                                                                                                |
| Biological Process | GO:0050994 | regulation of lipid catabolic process                         | 13/2279 | 60/18866  | 0.0249298 | 0.272299 | 0.2463858 | 13 | PNPLA2/SORL1/MFSD2A/GPLD1/TNF/CRTC3/ACACB/PRKCE/ABHD5/PDE3B/CPT1A/BSCL2/PRKAA1                                                                                                                                                            |
| Biological Process | GO:0046339 | diacylglycerol metabolic process                              | 7/2279  | 25/18866  | 0.0250004 | 0.272299 | 0.2463858 | 7  | PNPLA2/PLA2G15/PGS1/DGKQ/DGKA/DGKD/AVIL                                                                                                                                                                                                   |
| Biological Process | GO:1903421 | regulation of synaptic vesicle recycling                      | 7/2279  | 25/18866  | 0.0250004 | 0.272299 | 0.2463858 | 7  | DGKQ/SH3GL1/DNM1/DNM3/DNM1L/CYFIP1/FGF14                                                                                                                                                                                                  |
| Biological Process | GO:1904376 | negative regulation of protein localization to cell periphery | 7/2279  | 25/18866  | 0.0250004 | 0.272299 | 0.2463858 | 7  | MRAP/PPFIA1/LZTFL1/TGFB1/NUMB/CSK/BCL2L1                                                                                                                                                                                                  |



|                    |            |                                                                                                                                                  |         |           |           |          |           |    |                                                                                                                                                                                                                                                                                    |
|--------------------|------------|--------------------------------------------------------------------------------------------------------------------------------------------------|---------|-----------|-----------|----------|-----------|----|------------------------------------------------------------------------------------------------------------------------------------------------------------------------------------------------------------------------------------------------------------------------------------|
| Biological Process | GO:1904385 | cellular response to angiotensin                                                                                                                 | 7/2279  | 25/18866  | 0.0250004 | 0.272299 | 0.2463858 | 7  | MIR143/MIR145/ARID1B/AGTRAP/NFE2L2/AGTR1/RELA                                                                                                                                                                                                                                      |
| Biological Process | GO:0042063 | gliogenesis                                                                                                                                      | 49/2279 | 307/18866 | 0.0251002 | 0.272299 | 0.2463858 | 49 | AZU1/ARHGGEF10/S100A8/SH3TC2/CD9/PPARG/GSN/CREB1/HEXB/MYB/SKI/LGI4/TNFRSF1B/CRB1/NDRG1/CCR2/RHEB/TNF/CSF1R/FPR2/EIF2B5/RTN4/BIN1/DISC1/DLL1/APP/ILK/CLU/TNFRSF21/HDAC1/ZMIZ1/PAX2/TGFB1/PRKCH/NF1/CSK/GRN/WDR1/PRKCI/TTC21B/NOTCH1/TSPAN2/FA2H/CNTNAP1/RELA/CERS2/ERCC2/LIF/CX3CR1 |
| Biological Process | GO:1903169 | regulation of calcium ion transmembrane transport                                                                                                | 27/2279 | 152/18866 | 0.0253488 | 0.272299 | 0.2463858 | 27 | PDE4D/THADA/CASQ2/CACNA1C/SLC8A1/UBASH3B/TLR9/BIN1/JSRP1/AHNAK/NOS1AP/PTPN6/P2RY6/MYO5A/HTT/GSTO1/PRKCE/F2R/TMC1/DYSF/ANK2/PLCG1/CASQ1/FGF14/CBARP/STIMATE/CRACR2A                                                                                                                 |
| Biological Process | GO:0002824 | positive regulation of adaptive immune response based on somatic recombination of immune receptors built from immunoglobulin superfamily domains | 20/2279 | 105/18866 | 0.0254452 | 0.272299 | 0.2463858 | 20 | PRKCZ/SLC11A1/NLRP3/IL1R1/CCR2/TNF/TRAF2/TNFSF13B/CD226/HLA-F/TGFB1/PTPRC/TP53BP1/IL18R1/HLX/TNFSF13/FADD/PAXIP1/CYRIB/NSD2                                                                                                                                                        |
| Biological Process | GO:0097006 | regulation of plasma lipoprotein particle levels                                                                                                 | 20/2279 | 105/18866 | 0.0254452 | 0.272299 | 0.2463858 | 20 | P4HB/EHD1/MPO/AP2A1/MFSD2A/LIPC/PLAGL2/MIR199A1/GPLD1/ABCG1/HDLBP/PLTP/MIR27A/NR1H2/CSK/ABCA1/NPC1/MIR199A2/LMF1/AGTR1                                                                                                                                                             |
| Biological Process | GO:0043370 | regulation of CD4-positive, alpha-beta T cell differentiation                                                                                    | 11/2279 | 48/18866  | 0.0254916 | 0.272299 | 0.2463858 | 11 | IL27/PRKCZ/MYB/RUNX1/NLRP3/LOXL3/SMAD7/ZBTB7B/RARA/HLX/RUNX3                                                                                                                                                                                                                       |
| Biological Process | GO:2001239 | regulation of extrinsic apoptotic signaling pathway in absence of ligand                                                                         | 11/2279 | 48/18866  | 0.0254916 | 0.272299 | 0.2463858 | 11 | TNF/UNC5B/RIPK1/FGFR1/NF1/PPP2R1A/BCL2/PPP2R1B/BCL2L1/INHBA/DAPK3                                                                                                                                                                                                                  |
| Biological Process | GO:0031058 | positive regulation of histone modification                                                                                                      | 18/2279 | 92/18866  | 0.025682  | 0.272299 | 0.2463858 | 18 | BRD4/MYB/ARRB1/C6orf89/RPS6KA4/SPHK2/ZBTB7B/PAX7/CTBP1/PHF19/DNMT1/PIH1D1/SREBF1/RNF40/KAT7/LIF/PAXIP1/NSD3                                                                                                                                                                        |
| Biological Process | GO:0106027 | neuron projection organization                                                                                                                   | 18/2279 | 92/18866  | 0.025682  | 0.272299 | 0.2463858 | 18 | DCTN1/ZMYND8/CTTN/TANC1/EPHB3/BAIAP2/APP/IGF1R/WASL/SIPA1L1/DOCK10/DNM3/MAP1A/DNM1L/SHANK2/UBE3A/CUX2/DBNL                                                                                                                                                                         |

|                    |            |                                            |         |           |           |          |           |    |                                                                                                                                                                                                                                                                                                                                                                                                                       |
|--------------------|------------|--------------------------------------------|---------|-----------|-----------|----------|-----------|----|-----------------------------------------------------------------------------------------------------------------------------------------------------------------------------------------------------------------------------------------------------------------------------------------------------------------------------------------------------------------------------------------------------------------------|
| Biological Process | GO:0050920 | regulation of chemotaxis                   | 38/2279 | 229/18866 | 0.0260508 | 0.272299 | 0.2463858 | 38 | AZU1/ELANE/SEMA6B/CALR/C3AR1/IL16/CCR2/SMAD3/CCL5/CSF1R/FPR2/SEMA4A/PADI2/THBS1/SEMA4B/C5AR2/DEFB124/FGFR1/TGFB1/ZNF580/SEMA4D/ZSWIM5/PDGFD/JAM3/CAMK1D/CXCL17/IL6R/PDGFB/DAPK2/NOTCH1/DNM1L/DUSP3/PDGFRB/ANO6/DYSF/CCL27/ADGRA2/CYRIB                                                                                                                                                                                |
| Biological Process | GO:0009152 | purine ribonucleotide biosynthetic process | 30/2279 | 173/18866 | 0.0260581 | 0.272299 | 0.2463858 | 30 | PRKAG2/AMPD3/ENO1/ADCY2/ACSL1/ADCY9/ACOT7/VPS9D1/ACSS1/SPHK2/TGFB1/SLC26A1/ACACB/ACSS2/GUK1/ADCY4/PPCDC/PAPSS2/PKM/ACACA/ACSF3/AK2/AK5/NPPC/ACAT1/SCD/SLC25A1/PANK4/IMPDH1/ATP5PD                                                                                                                                                                                                                                     |
| Biological Process | GO:0051656 | establishment of organelle localization    | 66/2279 | 432/18866 | 0.0261005 | 0.272299 | 0.2463858 | 66 | CTSZ/PRKCZ/LAT/DCTN1/SERPINA1/TGFA/STX5/MAD1L1/PIK3CD/CSNK1D/NDE1/GAB2/KIF13A/DNM2/TRAPPC10/FGR/DYNC1H1/CD84/CHAMP1/C17orf75/CUL3/MYH9/TRAPPC9/RA B27A/ACTN4/MIS12/CDH3/WASL/SPHK2/FER/DCTN2/BICD2/CNIH2/MYO5A/BLK/CD59/HTT/SEC13/KIF5C/NUMA1/ANKRD28/DNM1/SEC24C/YWHAZ/RAD21L1/KIF1B/DNM3/CDCA5/ARHGEF2/KIFAP3/TMED2/MYO1C/SPAG5/AP3D1/MX1/FBXW11/NDEL1/EZR/SLIT1/DTNBP1/SEC31A/TERB2/IRAG2/PRKN/TRAPPC2/RIPOR1      |
| Biological Process | GO:0050821 | protein stabilization                      | 32/2279 | 187/18866 | 0.0262732 | 0.272299 | 0.2463858 | 32 | TRIM39/CALR/CREB1/AAK1/PIK3R1/SMAD3/MIR101-2/RTN4/TESC/USP36/CLU/SMAD7/PHB/PFN1/ATF7IP/STK3/GRN/CCNH/MORC3/ZBED3/CHEK2/NAA16/USP2/WDR81/ANK2/FLOT1/BAG5/CCT6A/PRKN/P3H1/MARCHF7/PLPP3                                                                                                                                                                                                                                 |
| Biological Process | GO:0010952 | positive regulation of peptidase activity  | 34/2279 | 201/18866 | 0.0263248 | 0.272299 | 0.2463858 | 34 | NLRC4/S100A8/GRAMD4/AIM2/PPARG/GSN/LCK/NLRP3/SMAD3/ARRB1/MEFV/TNF/TRAF2/CYFIP2/TBC1D10A/CTSD/CTSH/RIPK1/APP/MBP/CIDEB/PERP/BCL10/ATP2A3/GRN/FIS1/P2RX1/F2R/CASP1/BCL2L13/ASPH/NODAL/FADD/V SIR                                                                                                                                                                                                                        |
| Biological Process | GO:0009314 | response to radiation                      | 68/2279 | 447/18866 | 0.0263533 | 0.272299 | 0.2463858 | 68 | ELANE/BLM/RCVRN/PDE6A/SPIDR/MFAP4/CREB1/PPP1R1B/BRCA2/CACNA2D4/CRB1/PIK3R1/BMF/ARRB1/DNM2/HUS1/TANC1/APP/PITPNM1/FECH/CCDC66/GNAT2/SYNGAP1/CDC25A/HRH1/AQP1/MTA1/NF1/SLC1A2/GNA11/PTPRC/MEIS2/CREBBP/CAT/PPP1CB/COP53/PER2/NTRK1/SLC1A3/BCL2/DMC1/PER1/TP53BP1/FBXL6/GRK7/RHNO1/CHEK2/NEDD4/ERC1/CRIP1/USP2/BCL2L1/HMGCS1/RELA/BCL3/EYS/POLD3/XPA/CABP4/ERCC2/SYNPO/NPHP4/PAXIP1/EEF1D/PRKAA1/MAP3K20/ABRAXAS1/BABAM2 |
| Biological Process | GO:0002709 | regulation of T cell mediated immunity     | 15/2279 | 73/18866  | 0.0264436 | 0.272299 | 0.2463858 | 15 | PRKCZ/FUT7/TNFRSF1B/NLRP3/IL1R1/CCR2/TRAF2/DUSP22/HLA-F/SMAD7/RIPK3/PTPRC/IL18R1/FADD/CYRIB                                                                                                                                                                                                                                                                                                                           |
| Biological Process | GO:0015807 | L-amino acid transport                     | 15/2279 | 73/18866  | 0.0264436 | 0.272299 | 0.2463858 | 15 | SLC11A1/SLC1A5/SLC15A4/SLC43A2/SLC1A2/SLC7A7/SLC7A5/SFXN1/SLC1A6/PER2/SLC36A3/SLC1A3/SLC43A1/SLC7A8/SLC7A1                                                                                                                                                                                                                                                                                                            |
| Biological Process | GO:0070227 | lymphocyte apoptotic process               | 15/2279 | 73/18866  | 0.0264436 | 0.272299 | 0.2463858 | 15 | FOXP1/IL10/CCL5/HSH2D/RIPK1/PTCRA/TNFRSF21/DOCK8/RIPK3/ZC3H8/BLK/BCL10/TRAF3IP2/FADD/GIMAP8                                                                                                                                                                                                                                                                                                                           |

|                    |            |                                                        |        |         |           |          |           |   |                      |
|--------------------|------------|--------------------------------------------------------|--------|---------|-----------|----------|-----------|---|----------------------|
| Biological Process | GO:0000270 | peptidoglycan metabolic process                        | 3/2279 | 6/18866 | 0.0265458 | 0.272299 | 0.2463858 | 3 | LYG2/PGLYRP1/PGLYRP4 |
| Biological Process | GO:0006030 | chitin metabolic process                               | 3/2279 | 6/18866 | 0.0265458 | 0.272299 | 0.2463858 | 3 | CHI3L1/CHIT1/CHI3L2  |
| Biological Process | GO:0006032 | chitin catabolic process                               | 3/2279 | 6/18866 | 0.0265458 | 0.272299 | 0.2463858 | 3 | CHI3L1/CHIT1/CHI3L2  |
| Biological Process | GO:0006686 | sphingomyelin biosynthetic process                     | 3/2279 | 6/18866 | 0.0265458 | 0.272299 | 0.2463858 | 3 | SPTLC2/SGMS1/SGMS2   |
| Biological Process | GO:0009136 | purine nucleoside diphosphate biosynthetic process     | 3/2279 | 6/18866 | 0.0265458 | 0.272299 | 0.2463858 | 3 | GUK1/AK2/AK5         |
| Biological Process | GO:0009180 | purine ribonucleoside diphosphate biosynthetic process | 3/2279 | 6/18866 | 0.0265458 | 0.272299 | 0.2463858 | 3 | GUK1/AK2/AK5         |
| Biological Process | GO:0009253 | peptidoglycan catabolic process                        | 3/2279 | 6/18866 | 0.0265458 | 0.272299 | 0.2463858 | 3 | LYG2/PGLYRP1/PGLYRP4 |
| Biological Process | GO:0010694 | positive regulation of alkaline phosphatase activity   | 3/2279 | 6/18866 | 0.0265458 | 0.272299 | 0.2463858 | 3 | SMAD3/GPLD1/MEF2C    |
| Biological Process | GO:0010757 | negative regulation of plasminogen activation          | 3/2279 | 6/18866 | 0.0265458 | 0.272299 | 0.2463858 | 3 | CTSZ/THBS1/CPB2      |

|                    |            |                                                               |        |         |           |          |           |   |                         |
|--------------------|------------|---------------------------------------------------------------|--------|---------|-----------|----------|-----------|---|-------------------------|
| Biological Process | GO:0014916 | regulation of lung blood pressure                             | 3/2279 | 6/18866 | 0.0265458 | 0.272299 | 0.2463858 | 3 | SMAD3/MIR199A1/MIR199A2 |
| Biological Process | GO:0015942 | formate metabolic process                                     | 3/2279 | 6/18866 | 0.0265458 | 0.272299 | 0.2463858 | 3 | HAL/MTHFD1L/MTHFS       |
| Biological Process | GO:0019262 | N-acetylneuraminate catabolic process                         | 3/2279 | 6/18866 | 0.0265458 | 0.272299 | 0.2463858 | 3 | NAGK/AMDHD2/NPL         |
| Biological Process | GO:0034499 | late endosome to Golgi transport                              | 3/2279 | 6/18866 | 0.0265458 | 0.272299 | 0.2463858 | 3 | SNX3/NUMA1/SGSM2        |
| Biological Process | GO:0035434 | copper ion transmembrane transport                            | 3/2279 | 6/18866 | 0.0265458 | 0.272299 | 0.2463858 | 3 | SLC11A2/ATOX1/ATP7B     |
| Biological Process | GO:0042866 | pyruvate biosynthetic process                                 | 3/2279 | 6/18866 | 0.0265458 | 0.272299 | 0.2463858 | 3 | AGXT/HOGA1/PKM          |
| Biological Process | GO:0043152 | induction of bacterial agglutination                          | 3/2279 | 6/18866 | 0.0265458 | 0.272299 | 0.2463858 | 3 | RNASE3/SFTPD/SPON2      |
| Biological Process | GO:0043376 | regulation of CD8-positive, alpha-beta T cell differentiation | 3/2279 | 6/18866 | 0.0265458 | 0.272299 | 0.2463858 | 3 | RUNX1/ZBTB7B/RUNX3      |
| Biological Process | GO:0044648 | histone H3-K4 dimethylation                                   | 3/2279 | 6/18866 | 0.0265458 | 0.272299 | 0.2463858 | 3 | KMT2D/SETD1B/SETD1A     |

|                    |            |                                                                                             |        |         |           |          |           |   |                     |
|--------------------|------------|---------------------------------------------------------------------------------------------|--------|---------|-----------|----------|-----------|---|---------------------|
| Biological Process | GO:0045634 | regulation of melanocyte differentiation                                                    | 3/2279 | 6/18866 | 0.0265458 | 0.272299 | 0.2463858 | 3 | ZEB2/GNA11/BCL2     |
| Biological Process | GO:0048296 | regulation of isotype switching to IgA isotypes                                             | 3/2279 | 6/18866 | 0.0265458 | 0.272299 | 0.2463858 | 3 | TGFB1/TNFSF13/NSD2  |
| Biological Process | GO:0051136 | regulation of NK T cell differentiation                                                     | 3/2279 | 6/18866 | 0.0265458 | 0.272299 | 0.2463858 | 3 | ZBTB16/TGFBR2/AP3D1 |
| Biological Process | GO:0060842 | arterial endothelial cell differentiation                                                   | 3/2279 | 6/18866 | 0.0265458 | 0.272299 | 0.2463858 | 3 | DLL1/RBPJ/NOTCH1    |
| Biological Process | GO:0061419 | positive regulation of transcription from RNA polymerase II promoter in response to hypoxia | 3/2279 | 6/18866 | 0.0265458 | 0.272299 | 0.2463858 | 3 | RBPJ/NFE2L2/NOTCH1  |
| Biological Process | GO:0070535 | histone H2A K63-linked ubiquitination                                                       | 3/2279 | 6/18866 | 0.0265458 | 0.272299 | 0.2463858 | 3 | OTUB2/OTUB1/TRIP12  |
| Biological Process | GO:0072008 | glomerular mesangial cell differentiation                                                   | 3/2279 | 6/18866 | 0.0265458 | 0.272299 | 0.2463858 | 3 | PDGFB/NOTCH1/GPR4   |
| Biological Process | GO:0072126 | positive regulation of glomerular mesangial cell proliferation                              | 3/2279 | 6/18866 | 0.0265458 | 0.272299 | 0.2463858 | 3 | PDGFD/IL6R/PDGFB    |
| Biological Process | GO:0072143 | mesangial cell development                                                                  | 3/2279 | 6/18866 | 0.0265458 | 0.272299 | 0.2463858 | 3 | PDGFB/NOTCH1/GPR4   |

|                    |            |                                                                  |        |         |           |          |           |   |                       |
|--------------------|------------|------------------------------------------------------------------|--------|---------|-----------|----------|-----------|---|-----------------------|
| Biological Process | GO:0097198 | histone H3-K36 trimethylation                                    | 3/2279 | 6/18866 | 0.0265458 | 0.272299 | 0.2463858 | 3 | BRD4/SETD2/NSD3       |
| Biological Process | GO:1901341 | positive regulation of store-operated calcium channel activity   | 3/2279 | 6/18866 | 0.0265458 | 0.272299 | 0.2463858 | 3 | CASQ1/STIMATE/CRACR2A |
| Biological Process | GO:1902564 | negative regulation of neutrophil activation                     | 3/2279 | 6/18866 | 0.0265458 | 0.272299 | 0.2463858 | 3 | ABR/GRN/BCR           |
| Biological Process | GO:1903525 | regulation of membrane tubulation                                | 3/2279 | 6/18866 | 0.0265458 | 0.272299 | 0.2463858 | 3 | DNM2/ASAP1/WASL       |
| Biological Process | GO:1903721 | positive regulation of I-kappaB phosphorylation                  | 3/2279 | 6/18866 | 0.0265458 | 0.272299 | 0.2463858 | 3 | TNF/TRAF2/CX3CR1      |
| Biological Process | GO:1904179 | positive regulation of adipose tissue development                | 3/2279 | 6/18866 | 0.0265458 | 0.272299 | 0.2463858 | 3 | SORL1/SH3PXD2B/GHRL   |
| Biological Process | GO:1905274 | regulation of modification of postsynaptic actin cytoskeleton    | 3/2279 | 6/18866 | 0.0265458 | 0.272299 | 0.2463858 | 3 | ITSN1/BAIAP2/CYFIP1   |
| Biological Process | GO:1905634 | regulation of protein localization to chromatin                  | 3/2279 | 6/18866 | 0.0265458 | 0.272299 | 0.2463858 | 3 | SETD2/RB1/CDCA5       |
| Biological Process | GO:2000323 | negative regulation of glucocorticoid receptor signaling pathway | 3/2279 | 6/18866 | 0.0265458 | 0.272299 | 0.2463858 | 3 | PHB/ARNTL/PER1        |

|                    |            |                                                     |         |           |           |          |           |    |                                                                                                                                                                                                                                                               |
|--------------------|------------|-----------------------------------------------------|---------|-----------|-----------|----------|-----------|----|---------------------------------------------------------------------------------------------------------------------------------------------------------------------------------------------------------------------------------------------------------------|
| Biological Process | GO:2000489 | regulation of hepatic stellate cell activation      | 3/2279  | 6/18866   | 0.0265458 | 0.272299 | 0.2463858 | 3  | RPS6KA1/MYB/PDGFRB                                                                                                                                                                                                                                            |
| Biological Process | GO:0043401 | steroid hormone mediated signaling pathway          | 25/2279 | 139/18866 | 0.0266148 | 0.272299 | 0.2463858 | 25 | RXRA/FOXP1/CALR/NCOR2/RUNX1/AKAP13/YWHAH/PRMT2/LBH/PADI2/ZNF366/HDAC1/ZMIZ1/PHB/AXIN1/KMT2D/ARRB2/ARNTL/ESRRB/PER1/UBE3A/NEDD4/RNF14/NCOA4/NODAL                                                                                                              |
| Biological Process | GO:0030522 | intracellular receptor signaling pathway            | 43/2279 | 265/18866 | 0.0266962 | 0.272299 | 0.2463858 | 43 | RXRA/FOXP1/CALR/PPARG/NR1I2/NCOR2/RUNX1/MAP2K6/YWHAH/PRMT2/VDR/TNFAIP3/LBH/PADI2/ZNF366/ACTN4/HDAC1/ZMIZ1/PHB/AXIN1/KMT2D/RARA/UBE2V1/NR1H2/SEC14L1/CTBP2/RARG/NCOA1/ARRB2/ARNTL/IRAK2/NOD2/PER1/UBE3A/NEDD4/RNF14/CYLD/SREBF1/RELA/NCOA4/ALDH1A2/NR5A2/NODAL |
| Biological Process | GO:0002544 | chronic inflammatory response                       | 6/2279  | 20/18866  | 0.0267283 | 0.272299 | 0.2463858 | 6  | S100A8/IL10/TNF/TNFAIP3/CCL5/THBS1                                                                                                                                                                                                                            |
| Biological Process | GO:0007194 | negative regulation of adenylate cyclase activity   | 6/2279  | 20/18866  | 0.0267283 | 0.272299 | 0.2463858 | 6  | CCR2/GNAI2/AKAP5/LTB4R2/PALM/GABBR2                                                                                                                                                                                                                           |
| Biological Process | GO:0032495 | response to muramyl dipeptide                       | 6/2279  | 20/18866  | 0.0267283 | 0.272299 | 0.2463858 | 6  | IRF5/TNFAIP3/NOD2/NOTCH1/ARHGEF2/RELA                                                                                                                                                                                                                         |
| Biological Process | GO:0045618 | positive regulation of keratinocyte differentiation | 6/2279  | 20/18866  | 0.0267283 | 0.272299 | 0.2463858 | 6  | VDR/PRKCH/NUMA1/NOTCH1/ZBED2/MACROH2A2                                                                                                                                                                                                                        |
| Biological Process | GO:0060353 | regulation of cell adhesion molecule production     | 6/2279  | 20/18866  | 0.0267283 | 0.272299 | 0.2463858 | 6  | FUT7/MIR101-2/COLEC12/NOTCH1/NOTCH4/FLOT1                                                                                                                                                                                                                     |
| Biological Process | GO:0070932 | histone H3 deacetylation                            | 6/2279  | 20/18866  | 0.0267283 | 0.272299 | 0.2463858 | 6  | HDAC4/HDAC7/HDAC1/PER2/PER1/ELK4                                                                                                                                                                                                                              |

|                    |            |                                                   |         |           |           |          |           |    |                                                                                                                                                                                                                                                                                                 |
|--------------------|------------|---------------------------------------------------|---------|-----------|-----------|----------|-----------|----|-------------------------------------------------------------------------------------------------------------------------------------------------------------------------------------------------------------------------------------------------------------------------------------------------|
| Biological Process | GO:0007044 | cell-substrate junction assembly                  | 19/2279 | 99/18866  | 0.0268841 | 0.272299 | 0.2463858 | 19 | COL17A1/ITGB1BP1/SMAD3/ARHGEF7/CTTN/DUSP22/WHAMM/THBS1/TNS1/ACTN1/PTPRJ/TESK2/ACTG1/BCR/BCL2/CORO1C/DUSP3/LAMB3/DAPK3                                                                                                                                                                           |
| Biological Process | GO:0014910 | regulation of smooth muscle cell migration        | 17/2279 | 86/18866  | 0.0269875 | 0.272299 | 0.2463858 | 17 | HDAC4/SORL1/PLAU/SSH1/MIR140/MIR143/CCL5/ILK/P2RY6/PDGFD/PDGFB/NFE2L2/BCL2/MEF2C/PDGFRB/TRIB1/CCN4                                                                                                                                                                                              |
| Biological Process | GO:2000106 | regulation of leukocyte apoptotic process         | 17/2279 | 86/18866  | 0.0269875 | 0.272299 | 0.2463858 | 17 | FOXP1/IL10/PIK3CD/ITPKB/CCL5/HSH2D/PTCRA/DOCK8/RAPGEF2/RIPK3/ZC3H8/BLK/BCL10/NOD2/MEF2C/FADD/GIMAP8                                                                                                                                                                                             |
| Biological Process | GO:0042542 | response to hydrogen peroxide                     | 26/2279 | 146/18866 | 0.0270225 | 0.272299 | 0.2463858 | 26 | TRPM2/IL10/LCN2/MYB/SLC8A1/TNFAIP3/RIPK1/PAX2/ZNF580/HBB/AQP1/RIPK3/STK24/PDGFD/CAT/ETS1/NFE2L2/IL18RAP/BCL2/UBE3A/GLRX2/PDGFRB/FOXO1/RELA/MB/PRKAA1                                                                                                                                            |
| Biological Process | GO:0034976 | response to endoplasmic reticulum stress          | 47/2279 | 294/18866 | 0.0270828 | 0.272299 | 0.2463858 | 47 | P4HB/DCTN1/CALR/ERN1/PIK3R1/AMFR/MBTPS1/RHBDD2/TRAF2/NCK2/EIF2B5/UBAC2/ITPR1/YIF1A/THBS1/EDEM1/HM13/DERL2/ZBTB17/PDIA5/CLU/UBE2J2/CLGN/TMX1/POMT2/COP55/NR1H2/EDEM2/ATP2A3/CREB3L2/GORASP2/NFE2L2/ADD1/BCL2/CEBPB/BCL2L1/FLOT1/GRINA/KLHDC3/EIF4G1/UBXN8/SEC31A/SVIP/ACADVL/MARCHF6/NIBAN1/PRKN |
| Biological Process | GO:0010822 | positive regulation of mitochondrion organization | 22/2279 | 119/18866 | 0.02713   | 0.272299 | 0.2463858 | 22 | TFDP1/YWHAH/VPS13D/BMF/FBXO7/CAMKK2/USP36/ABLIM3/UBE2J2/CIDEB/SMURF1/HTT/HK2/YWHAZ/FIS1/BCL2/DNM1L/TP53BP2/MIEF1/YWHAQ/PRKAA1/PRKN                                                                                                                                                              |
| Biological Process | GO:1901222 | regulation of NIK/NF-kappaB signaling             | 22/2279 | 119/18866 | 0.02713   | 0.272299 | 0.2463858 | 22 | CALR/C1QTNF3/CHI3L1/HDAC7/NLRP3/TNF/TRAF2/AGO1/TLR9/APP/ACTN4/ILK/CPNE1/PHB/LITAF/NOD2/IL18R1/CYLD/RELA/FBXW11/BCL3/ADGRG3                                                                                                                                                                      |
| Biological Process | GO:0000098 | sulfur amino acid catabolic process               | 5/2279  | 15/18866  | 0.0271411 | 0.272299 | 0.2463858 | 5  | GADL1/CBS/AGXT/ADO/MAT1A                                                                                                                                                                                                                                                                        |
| Biological Process | GO:0001325 | formation of extrachromosomal circular DNA        | 5/2279  | 15/18866  | 0.0271411 | 0.272299 | 0.2463858 | 5  | BLM/RTEL1/SMARCAL1/ERCC1/SLX4                                                                                                                                                                                                                                                                   |



|                    |            |                                                            |        |          |           |          |           |   |                                              |
|--------------------|------------|------------------------------------------------------------|--------|----------|-----------|----------|-----------|---|----------------------------------------------|
| Biological Process | GO:0002091 | negative regulation of receptor internalization            | 5/2279 | 15/18866 | 0.0271411 | 0.272299 | 0.2463858 | 5 | MIR199A1/ANKRD13B/ANKRD13D/ANKRD13A/MIR199A2 |
| Biological Process | GO:0002467 | germinal center formation                                  | 5/2279 | 15/18866 | 0.0271411 | 0.272299 | 0.2463858 | 5 | TNFAIP3/TNFSF13B/KLHL6/MEF2C/BCL3            |
| Biological Process | GO:0020027 | hemoglobin metabolic process                               | 5/2279 | 15/18866 | 0.0271411 | 0.272299 | 0.2463858 | 5 | ALAS1/CAT/ADD1/EPB42/INHBA                   |
| Biological Process | GO:0030852 | regulation of granulocyte differentiation                  | 5/2279 | 15/18866 | 0.0271411 | 0.272299 | 0.2463858 | 5 | RUNX1/INPP5D/TESC/RARA/TRIB1                 |
| Biological Process | GO:0045064 | T-helper 2 cell differentiation                            | 5/2279 | 15/18866 | 0.0271411 | 0.272299 | 0.2463858 | 5 | PRKCZ/NLRP3/RARA/HLX/BCL3                    |
| Biological Process | GO:0060766 | negative regulation of androgen receptor signaling pathway | 5/2279 | 15/18866 | 0.0271411 | 0.272299 | 0.2463858 | 5 | FOXP1/NCOR2/HDAC1/PHB/NODAL                  |
| Biological Process | GO:0071501 | cellular response to sterol depletion                      | 5/2279 | 15/18866 | 0.0271411 | 0.272299 | 0.2463858 | 5 | AMFR/ZBTB7B/ARHGEF10L/SREBF1/SPRING1         |
| Biological Process | GO:0072160 | nephron tubule epithelial cell differentiation             | 5/2279 | 15/18866 | 0.0271411 | 0.272299 | 0.2463858 | 5 | PAX2/MTSS1/WWTR1/MEF2C/LIF                   |
| Biological Process | GO:0090110 | COPII-coated vesicle cargo loading                         | 5/2279 | 15/18866 | 0.0271411 | 0.272299 | 0.2463858 | 5 | SEC23B/MIA3/SEC13/SEC24C/SEC31A              |

|                    |            |                                                     |         |          |           |           |           |    |                                                                                        |
|--------------------|------------|-----------------------------------------------------|---------|----------|-----------|-----------|-----------|----|----------------------------------------------------------------------------------------|
| Biological Process | GO:0090656 | t-circle formation                                  | 5/2279  | 15/18866 | 0.0271411 | 0.272299  | 0.2463858 | 5  | BLM/RTEL1/SMARCAL1/ERCC1/SLX4                                                          |
| Biological Process | GO:0090737 | telomere maintenance via telomere trimming          | 5/2279  | 15/18866 | 0.0271411 | 0.272299  | 0.2463858 | 5  | BLM/RTEL1/SMARCAL1/ERCC1/SLX4                                                          |
| Biological Process | GO:0006026 | aminoglycan catabolic process                       | 14/2279 | 67/18866 | 0.0274265 | 0.2736515 | 0.2476096 | 14 | HEXB/CHI3L1/GALNS/LYG2/CHIT1/SDC2/TGFB1/STAB2/PGLYRP1/LYVE1/ARSB/CHI3L2/PGLYRP4/CEMIP2 |
| Biological Process | GO:0033866 | nucleoside bisphosphate biosynthetic process        | 14/2279 | 67/18866 | 0.0274265 | 0.2736515 | 0.2476096 | 14 | ACSL1/ACOT7/ACSS1/SLC26A1/ACACB/ACSS2/PPCDC/PAPSS2/ACACA/ACSF3/ACAT1/SCD/SLC25A1/PANK4 |
| Biological Process | GO:0034030 | ribonucleoside bisphosphate biosynthetic process    | 14/2279 | 67/18866 | 0.0274265 | 0.2736515 | 0.2476096 | 14 | ACSL1/ACOT7/ACSS1/SLC26A1/ACACB/ACSS2/PPCDC/PAPSS2/ACACA/ACSF3/ACAT1/SCD/SLC25A1/PANK4 |
| Biological Process | GO:0034033 | purine nucleoside bisphosphate biosynthetic process | 14/2279 | 67/18866 | 0.0274265 | 0.2736515 | 0.2476096 | 14 | ACSL1/ACOT7/ACSS1/SLC26A1/ACACB/ACSS2/PPCDC/PAPSS2/ACACA/ACSF3/ACAT1/SCD/SLC25A1/PANK4 |
| Biological Process | GO:1903672 | positive regulation of sprouting angiogenesis       | 14/2279 | 67/18866 | 0.0274265 | 0.2736515 | 0.2476096 | 14 | IL10/MAP3K3/HDAC7/MIR101-2/DLL1/AKT3/MIR27A/MIR23A/JAK1/BMPER/GHRL/PKM/AGTR1/PPP1R16B  |
| Biological Process | GO:0003299 | muscle hypertrophy in response to stress            | 8/2279  | 31/18866 | 0.0275351 | 0.2736515 | 0.2476096 | 8  | HDAC4/SMAD3/MIR199A1/CAMTA2/MIR199A2/MEF2C/FOXO1/INPP5F                                |
| Biological Process | GO:0014887 | cardiac muscle adaptation                           | 8/2279  | 31/18866 | 0.0275351 | 0.2736515 | 0.2476096 | 8  | HDAC4/SMAD3/MIR199A1/CAMTA2/MIR199A2/MEF2C/FOXO1/INPP5F                                |

|                    |            |                                                                    |         |           |           |           |           |    |                                                                                                                                                                                                                                                                                                                                                      |
|--------------------|------------|--------------------------------------------------------------------|---------|-----------|-----------|-----------|-----------|----|------------------------------------------------------------------------------------------------------------------------------------------------------------------------------------------------------------------------------------------------------------------------------------------------------------------------------------------------------|
| Biological Process | GO:0014898 | cardiac muscle hypertrophy in response to stress                   | 8/2279  | 31/18866  | 0.0275351 | 0.2736515 | 0.2476096 | 8  | HDAC4/SMAD3/MIR199A1/CAMTA2/MIR199A2/MEF2C/FOXO1/INPP5F                                                                                                                                                                                                                                                                                              |
| Biological Process | GO:0050858 | negative regulation of antigen receptor-mediated signaling pathway | 8/2279  | 31/18866  | 0.0275351 | 0.2736515 | 0.2476096 | 8  | DUSP22/PTPN6/PTPRJ/LILRB4/DUSP3/ELF1/EZR/SLA2                                                                                                                                                                                                                                                                                                        |
| Biological Process | GO:0030038 | contractile actin filament bundle assembly                         | 20/2279 | 106/18866 | 0.0279204 | 0.2768296 | 0.2504853 | 20 | ARHGEF10/TACSTD2/ITGB1BP1/PIK3R1/SMAD3/ARRB1/SH3PXD2B/ARAP1/CUL3/SYNPO2L/PXN/WNT11/ITGB5/PPFIA1/PFN1/ACTG1/MIR138-2/ARHGEF10L/ARHGEF18/ARHGEF15                                                                                                                                                                                                      |
| Biological Process | GO:0043149 | stress fiber assembly                                              | 20/2279 | 106/18866 | 0.0279204 | 0.2768296 | 0.2504853 | 20 | ARHGEF10/TACSTD2/ITGB1BP1/PIK3R1/SMAD3/ARRB1/SH3PXD2B/ARAP1/CUL3/SYNPO2L/PXN/WNT11/ITGB5/PPFIA1/PFN1/ACTG1/MIR138-2/ARHGEF10L/ARHGEF18/ARHGEF15                                                                                                                                                                                                      |
| Biological Process | GO:0001818 | negative regulation of cytokine production                         | 56/2279 | 360/18866 | 0.0279423 | 0.2768296 | 0.2504853 | 56 | ELANE/TRIM27/ZFPM1/IL10/C1QTNF3/MIR140/MIR145/HDAC7/SLC11A1/NLRP3/ARRB1/MIR199A1/MEFV/TNF/TNFAIP3/SFTPD/CD84/MIR101-2/TLR9/TRAIP/NAV3/THBS1/DLL1/C5AR2/HLA-F/PTPN6/MIR24-2/RPS6KA4/SMAD7/TNFRSF21/WNT11/CDH3/FGFR1/TGFB1/TIGIT/RARA/PGLYRP1/GHRL/PTPRC/CSK/ASB1/NLRC5/ARRB2/MIR199A2/LTF/CYLD/CD96/CD33/BCL3/EZR/HERC5/INHBA/CX3CR1/NDRG2/VSIR/ILRUN |
| Biological Process | GO:0035303 | regulation of dephosphorylation                                    | 35/2279 | 209/18866 | 0.0280386 | 0.2774948 | 0.2510871 | 35 | LMTK2/MGAT5/PPP1R1B/URI1/SMAD3/CABIN1/GPLD1/TNF/CCDC8/GNAI2/CAMTA1/ELFN2/RCAN1/SMG7/PHACTR2/TGFB1/FARP1/SEMA4D/PPP2R5C/RIPK3/HTT/PTPRC/SMG6/PPP2R1A/PPP2R5E/PPP2R5D/MEF2C/PPP2R1B/PDGFRB/WDR81/PPP1R16B/CD33/SPOCD1/ANKLE2/PTPA                                                                                                                      |
| Biological Process | GO:1901136 | carbohydrate derivative catabolic process                          | 33/2279 | 195/18866 | 0.0281257 | 0.2780674 | 0.2516052 | 33 | PDE4D/CDA/DPYS/AMPD3/NAGK/HEXB/AMDHD2/CHI3L1/GALNS/NPL/GALC/AOAH/LYG2/CHIT1/EDEM1/NUDT3/ACOT7/SDC2/UNG/TGFB1/STAB2/NTHL1/PGLYRP1/EDEM2/UPB1/PDE9A/PNP/LYVE1/ARSB/ACAT1/CHI3L2/PGLYRP4/CEMIP2                                                                                                                                                         |
| Biological Process | GO:0043954 | cellular component maintenance                                     | 13/2279 | 61/18866  | 0.0282926 | 0.278597  | 0.2520844 | 13 | PRTN3/DCTN1/CD177/ZMYND8/CTTN/CSF1R/TANC1/IGF1R/SYNGAP1/PLEKHA7/CTBP2/F2R/KIFC3                                                                                                                                                                                                                                                                      |
| Biological Process | GO:0045071 | negative regulation of viral genome replication                    | 13/2279 | 61/18866  | 0.0282926 | 0.278597  | 0.2520844 | 13 | SLPI/SRPK2/TNF/CCL5/TNIP1/LTF/ILF3/MX1/PARP10/BANF1/ISG20/PRKN/SHFL                                                                                                                                                                                                                                                                                  |

|                    |            |                                                                        |         |           |           |           |           |    |                                                                                                                                                                                                                                                                                                                    |
|--------------------|------------|------------------------------------------------------------------------|---------|-----------|-----------|-----------|-----------|----|--------------------------------------------------------------------------------------------------------------------------------------------------------------------------------------------------------------------------------------------------------------------------------------------------------------------|
| Biological Process | GO:0090303 | positive regulation of wound healing                                   | 13/2279 | 61/18866  | 0.0282926 | 0.278597  | 0.2520844 | 13 | RREB1/KANK1/MYLK/THBS1/F12/ACTG1/NFE2L2/PRKCE/CPB2/F2R/ANO6/PLPP3/CCN4                                                                                                                                                                                                                                             |
| Biological Process | GO:0031397 | negative regulation of protein ubiquitination                          | 16/2279 | 80/18866  | 0.0282966 | 0.278597  | 0.2520844 | 16 | ARRB1/TNFAIP3/MIR101-2/OTUB2/SMAD7/ARRB2/MIR138-2/PER2/OTUB1/NXN/PRKCE/TRIP12/DYSF/BAG5/PARP10/MARCHF7                                                                                                                                                                                                             |
| Biological Process | GO:0072175 | epithelial tube formation                                              | 24/2279 | 133/18866 | 0.0283469 | 0.2787457 | 0.252219  | 24 | SHROOM3/SKI/SETD2/SPINT2/MTHFD1L/SUFU/ZEB2/MIB1/PAX2/TGFB1/RARA/PFN1/RARG/STK3/GRHL2/BCL10/MTHFD1/RALA/TMED2/TSC2/TEAD2/LMO4/NODAL/BRD2                                                                                                                                                                            |
| Biological Process | GO:0014909 | smooth muscle cell migration                                           | 18/2279 | 93/18866  | 0.0283704 | 0.2787457 | 0.252219  | 18 | HDAC4/SORL1/PLAU/SSH1/MIR140/MIR143/CCL5/ILK/P2RY6/PDGFD/ITGB3/PDGFB/NFE2L2/BCL2/MEF2C/PDGFRB/TRIB1/CCN4                                                                                                                                                                                                           |
| Biological Process | GO:0048545 | response to steroid hormone                                            | 54/2279 | 346/18866 | 0.0287823 | 0.2825009 | 0.2556169 | 54 | RXRA/FOXP1/CALR/IL10/NCOR2/RUNX1/URI1/AKAP13/YWHAH/PRMT2/TNF/LBH/ABCC2/PADI2/TGFBR2/SMYD3/THBS1/ALPL/ZNF366/FECH/HDAC1/ZMIZ1/TGFB1/PHB/IL1RN/AXIN1/AQP1/KMT2D/AGXT/NCOA1/ENG/ARRB2/ARNTL/NPC1/ESRRB/BCL2/PER1/NOTCH1/SLIT3/UBE3A/NEDD4/PCK2/RNF14/FOXO1/NCOA2/SREBF1/ADTRP/RELA/NCOA4/PTPRU/HSD11B2/NODAL/HNMT/SST |
| Biological Process | GO:0010614 | negative regulation of cardiac muscle hypertrophy                      | 9/2279  | 37/18866  | 0.0288902 | 0.2829754 | 0.2560462 | 9  | CTDP1/MIR145/TNFRSF1B/SMAD3/MIR199A1/TNFRSF1A/MIR199A2/NOTCH1/FOXO1                                                                                                                                                                                                                                                |
| Biological Process | GO:1905314 | semi-lunar valve development                                           | 9/2279  | 37/18866  | 0.0288902 | 0.2829754 | 0.2560462 | 9  | TNFRSF1B/GJA5/NFATC1/RBPJ/TNFRSF1A/TGFB1/RB1/NOTCH1/SLIT3                                                                                                                                                                                                                                                          |
| Biological Process | GO:0002720 | positive regulation of cytokine production involved in immune response | 12/2279 | 55/18866  | 0.0289793 | 0.2832633 | 0.2563067 | 12 | PRKCZ/NLRP3/IL1R1/TRAF2/SPON2/CD226/HLA-F/SCIMP/SLC7A5/BCL10/NOD2/IL18R1                                                                                                                                                                                                                                           |
| Biological Process | GO:0032655 | regulation of interleukin-12 production                                | 12/2279 | 55/18866  | 0.0289793 | 0.2832633 | 0.2563067 | 12 | IRF8/FOXP1/IL10/IRF5/IL16/MEFV/TLR9/THBS1/SCIMP/TIGIT/PLCB1/ARRB2                                                                                                                                                                                                                                                  |

|                    |            |                                                   |         |           |           |           |          |    |                                                                                                                                                                      |
|--------------------|------------|---------------------------------------------------|---------|-----------|-----------|-----------|----------|----|----------------------------------------------------------------------------------------------------------------------------------------------------------------------|
| Biological Process | GO:0007043 | cell-cell junction assembly                       | 26/2279 | 147/18866 | 0.0291827 | 0.2841368 | 0.257097 | 26 | TBCD/CD9/TLN2/HDAC7/RUNX1/PRKCA/TNF/GJA5/JUP/PKP1/ACTN4/SMAD7/WNT11/PRKCH/EPB41L3/JAM3/ACTG1/GRHL2/WDR1/PRKCI/MPP7/CNTNAP1/MYO1C/ANK2/CDH11/NPHP4                    |
| Biological Process | GO:0046467 | membrane lipid biosynthetic process               | 26/2279 | 147/18866 | 0.0291827 | 0.2841368 | 0.257097 | 26 | SPTLC2/PIGL/PIGU/TNF/ORMDL3/CERS6/PIGN/TNFRSF1A/SPHK2/SGMS1/B3GNT5/ST8SIA6/ST3GAL4/SGMS2/B4GALT3/SGPP1/SGPP2/PIGQ/P2RX1/FA2H/CERS2/SIRT3/ST3GAL2/PRKAA1/TLCD3B/PLPP3 |
| Biological Process | GO:0007595 | lactation                                         | 11/2279 | 49/18866  | 0.0293987 | 0.2841368 | 0.257097 | 11 | NCOR2/CREB1/VDR/STAT5A/ZBTB7B/HK2/NCOA1/USF2/SLC29A1/ATP7B/DHODH                                                                                                     |
| Biological Process | GO:0010712 | regulation of collagen metabolic process          | 11/2279 | 49/18866  | 0.0293987 | 0.2841368 | 0.257097 | 11 | MFAP4/PPARG/MIR145/MYB/TGFB1/ENG/ARRB2/F2R/NPPC/PDGFRB/VSIR                                                                                                          |
| Biological Process | GO:0032527 | protein exit from endoplasmic reticulum           | 11/2279 | 49/18866  | 0.0293987 | 0.2841368 | 0.257097 | 11 | SORL1/TM9SF4/TMEM30A/UBAC2/EDEM1/HM13/DERL2/SEC13/EDEM2/NUMA1/SVIP                                                                                                   |
| Biological Process | GO:0032663 | regulation of interleukin-2 production            | 11/2279 | 49/18866  | 0.0293987 | 0.2841368 | 0.257097 | 11 | PDE4D/TRIM27/HDAC7/RUNX1/CCR2/TRAF2/TNFAIP3/SFTPD/NAV3/PTPRC/EZR                                                                                                     |
| Biological Process | GO:0060711 | labyrinthine layer development                    | 11/2279 | 49/18866  | 0.0293987 | 0.2841368 | 0.257097 | 11 | IL10/SPINT2/RBPJ/DNAJB6/GRHL2/NCOA1/VASH1/GGNBP2/TMED2/PCDH12/PLCD3                                                                                                  |
| Biological Process | GO:0071349 | cellular response to interleukin-12               | 11/2279 | 49/18866  | 0.0293987 | 0.2841368 | 0.257097 | 11 | P4HB/IL10/RAP1B/SERPINB2/AIP/JAK1/PITPNA/PLCB1/RALA/CA1/GSTO1                                                                                                        |
| Biological Process | GO:1990090 | cellular response to nerve growth factor stimulus | 11/2279 | 49/18866  | 0.0293987 | 0.2841368 | 0.257097 | 11 | EHD1/CREB1/ACAP2/APP/RAPGEF2/SORT1/NTRK1/MICALL1/KIF1B/UBE3A/NTF4                                                                                                    |

|                    |            |                                                                            |         |           |           |           |           |    |                                                                                                                                                                                                         |
|--------------------|------------|----------------------------------------------------------------------------|---------|-----------|-----------|-----------|-----------|----|---------------------------------------------------------------------------------------------------------------------------------------------------------------------------------------------------------|
| Biological Process | GO:0030521 | androgen receptor signaling pathway                                        | 10/2279 | 43/18866  | 0.0294275 | 0.2841368 | 0.257097  | 10 | FOXP1/NCOR2/PRMT2/HDAC1/ZMIZ1/PHB/ARRB2/UBE3A/RNF14/NODAL                                                                                                                                               |
| Biological Process | GO:0090207 | regulation of triglyceride metabolic process                               | 10/2279 | 43/18866  | 0.0294275 | 0.2841368 | 0.257097  | 10 | PNPLA2/SORL1/MFSD2A/GPLD1/NR1H2/ATG14/GNB3/LMF1/ABHD5/SREBF1                                                                                                                                            |
| Biological Process | GO:0090317 | negative regulation of intracellular protein transport                     | 10/2279 | 43/18866  | 0.0294275 | 0.2841368 | 0.257097  | 10 | KCNE1/ANGPT1/ITGB1BP1/SUFU/UBAC2/DERL2/NF1/CABP1/SP100/SVIP                                                                                                                                             |
| Biological Process | GO:0002262 | myeloid cell homeostasis                                                   | 27/2279 | 154/18866 | 0.0294806 | 0.2842331 | 0.2571842 | 27 | MAEA/KLF1/ZFPM1/AMPD3/PIK3CD/INPP5D/TRIM10/ITPKB/CCR2/HIPK2/SLC11A2/BRD1/TMOD3/JAM3/SP3/ALAS1/SFXN1/ETS1/ADD1/RB1/EPAS1/EPB42/KAT7/INHBA/ERCC2/MB/TMEM14C                                               |
| Biological Process | GO:0002702 | positive regulation of production of molecular mediator of immune response | 19/2279 | 100/18866 | 0.029559  | 0.2842331 | 0.2571842 | 19 | PRKCZ/NLRP3/IL1R1/TRAF2/TLR9/SPON2/CD226/HLA-F/SCIMP/TGFB1/SLC7A5/PTPRC/BCL10/NOD2/TP53BP1/IL18R1/TNFSF13/PAXIP1/NSD2                                                                                   |
| Biological Process | GO:0045069 | regulation of viral genome replication                                     | 19/2279 | 100/18866 | 0.029559  | 0.2842331 | 0.2571842 | 19 | SLPI/TRIM38/SRPK2/TNF/CCL5/LARP1/PHB/TNIP1/BCL2/NOTCH1/LTF/ILF3/MX1/NR5A2/PARP10/BANF1/ISG20/PRKN/SHFL                                                                                                  |
| Biological Process | GO:0036465 | synaptic vesicle recycling                                                 | 15/2279 | 74/18866  | 0.029587  | 0.2842331 | 0.2571842 | 15 | SYNJ2/DENND1A/DNM2/ITSN1/STON1/DGKQ/ACTG1/SH3GL1/DNM1/DNM3/DNM1L/AP3D1/MX1/CYFIP1/FGF14                                                                                                                 |
| Biological Process | GO:1903036 | positive regulation of response to wounding                                | 15/2279 | 74/18866  | 0.029587  | 0.2842331 | 0.2571842 | 15 | RREB1/KANK1/MYLK/THBS1/F12/ACTG1/GRN/NFE2L2/PRKCE/CPB2/F2R/ANO6/NDEL1/PLPP3/CCN4                                                                                                                        |
| Biological Process | GO:0060759 | regulation of response to cytokine stimulus                                | 33/2279 | 196/18866 | 0.0300288 | 0.2878698 | 0.2604748 | 33 | GFI1/VRK2/PPARG/RUNX1/ANGPT1/IL1R1/TNF/TRAF2/TNFAIP3/CCL5/TRAF1/TRAIP/PADI2/RIPK1/PTPN6/MIR24-2/MIR27A/TNFRSF1A/CPNE1/JAK1/IL1RN/NR1H2/PTPRC/NLRC5/MIR138-2/IRAK2/SLIT3/ELF1/CASP1/CYLD/PARP9/FADD/PRKN |

|                    |            |                                                         |         |           |           |           |           |    |                                                                                                                                                                                                                                                                                                                                      |
|--------------------|------------|---------------------------------------------------------|---------|-----------|-----------|-----------|-----------|----|--------------------------------------------------------------------------------------------------------------------------------------------------------------------------------------------------------------------------------------------------------------------------------------------------------------------------------------|
| Biological Process | GO:0090316 | positive regulation of intracellular protein transport  | 31/2279 | 182/18866 | 0.0300432 | 0.2878698 | 0.2604748 | 31 | SORL1/TFDP1/PRR5L/TM9SF4/TMEM30A/YWHAH/ITGB1BP1/PIK3R1/SMAD3/JUP/EDEM1/USP36/ZDHHC2/TCF7L2/ABLIM3/AKAP5/UBE2J2/TGFB1/EDEM2/ITGB2/YWHAZ/CDH1/FIS1/BCL2/TP53BP2/MYO1C/MIEF1/YWHAQ/PDZK1/PRKAA1/RIPOR1                                                                                                                                  |
| Biological Process | GO:0043534 | blood vessel endothelial cell migration                 | 32/2279 | 189/18866 | 0.0300565 | 0.2878698 | 0.2604748 | 32 | PPARG/MAP3K3/MIR143/HDAC7/ANGPT1/ITGB1BP1/PRKCA/MIR199A1/GPLD1/TNF/MIR101-2/STAT5A/JUP/THBS1/MYH9/AKT3/MIR24-2/MIR27A/MIR23A/MIA3/FGFR1/TGFB1/NF1/PDGFB/ETS1/NFE2L2/VASH1/MIR199A2/NOTCH1/MEF2C/PLCG1/ADTRP                                                                                                                          |
| Biological Process | GO:0071621 | granulocyte chemotaxis                                  | 23/2279 | 127/18866 | 0.0301895 | 0.2885619 | 0.261101  | 23 | PDE4D/S100A8/C3AR1/PIK3CD/CSF3R/CCL5/CSF1R/THBS1/CSAR2/PREX1/HRH1/JAM3/CAMK1D/CXCL17/CCL20/CXCR1/ITGB2/DAPK2/DNM1L/DYSF/CCL22/VAV3/JAML                                                                                                                                                                                              |
| Biological Process | GO:1905477 | positive regulation of protein localization to membrane | 23/2279 | 127/18866 | 0.0301895 | 0.2885619 | 0.261101  | 23 | SSH1/TFDP1/YWHAH/ITGB1BP1/PIK3R1/RHOG/TNF/ZDHHC2/AKAP5/PRKCH/PRKCI/ITGB2/YWHAZ/FIS1/BCL2/PRKCE/TP53BP2/MYO1C/MIEF1/YWHAQ/EZR/PDZK1/PRKN                                                                                                                                                                                              |
| Biological Process | GO:1990778 | protein localization to cell periphery                  | 53/2279 | 340/18866 | 0.0306612 | 0.2915353 | 0.2637915 | 53 | PRKCZ/EHD1/BSG/ITGB1BP1/PIK3R1/MAP7/RHOG/TSPAN14/KIF13A/RAB31/TNF/PACS2/TTC7A/JUP/TESC/TNIK/ZDHHC2/TNFRSF1A/MRAP/AKAP5/SLC9A3R2/ZDHHC7/PPFIA1/LZTFL1/TGFB1/PRKCH/RAB40C/RAPGEF2/TTC7B/SMURF1/VAMP5/MYO5A/EPB41L3/NUMB/CSK/NUMA1/PALM/GORASP2/PRKCI/RILPL1/CDH1/KIF1B/PRAM1/PRKCE/TMED2/BCL2L1/ANK2/EZR/PDZK1/FLOT1/MYADM/SPTBN4/FYB1 |
| Biological Process | GO:0001783 | B cell apoptotic process                                | 7/2279  | 26/18866  | 0.0307461 | 0.2915353 | 0.2637915 | 7  | FOXP1/IL10/HSH2D/TNFRSF21/BLK/BCL10/TRAF3IP2                                                                                                                                                                                                                                                                                         |
| Biological Process | GO:0015012 | heparan sulfate proteoglycan biosynthetic process       | 7/2279  | 26/18866  | 0.0307461 | 0.2915353 | 0.2637915 | 7  | CSGALNACT1/HS3ST3B1/DSE/NDST1/TCF7L2/XYL1/PXYLP1                                                                                                                                                                                                                                                                                     |
| Biological Process | GO:0030318 | melanocyte differentiation                              | 7/2279  | 26/18866  | 0.0307461 | 0.2915353 | 0.2637915 | 7  | ZEB2/RAB27A/MYO5A/GNA11/BCL2/MEF2C/HPS6                                                                                                                                                                                                                                                                                              |
| Biological Process | GO:0051016 | barbed-end actin filament capping                       | 7/2279  | 26/18866  | 0.0307461 | 0.2915353 | 0.2637915 | 7  | VILL/GSN/CAPG/SVIL/ADD1/AVIL/FLII                                                                                                                                                                                                                                                                                                    |

|                    |            |                                                                       |         |           |           |           |           |    |                                                                                                                                                                                                                                                                            |
|--------------------|------------|-----------------------------------------------------------------------|---------|-----------|-----------|-----------|-----------|----|----------------------------------------------------------------------------------------------------------------------------------------------------------------------------------------------------------------------------------------------------------------------------|
| Biological Process | GO:0060307 | regulation of ventricular cardiac muscle cell membrane repolarization | 7/2279  | 26/18866  | 0.0307461 | 0.2915353 | 0.2637915 | 7  | KCNE1/GJA5/NOS1AP/WDR1/SNTA1/KCNQ1/ANK2                                                                                                                                                                                                                                    |
| Biological Process | GO:0072012 | glomerulus vasculature development                                    | 7/2279  | 26/18866  | 0.0307461 | 0.2915353 | 0.2637915 | 7  | ANGPT1/PDGFD/IL6R/PDGFB/NOTCH1/GPR4/PDGFRB                                                                                                                                                                                                                                 |
| Biological Process | GO:1901071 | glucosamine-containing compound metabolic process                     | 7/2279  | 26/18866  | 0.0307461 | 0.2915353 | 0.2637915 | 7  | NAGK/AMDHD2/CHI3L1/MGAT3/CHIT1/CHST2/CHI3L2                                                                                                                                                                                                                                |
| Biological Process | GO:0016054 | organic acid catabolic process                                        | 45/2279 | 282/18866 | 0.0308371 | 0.2918156 | 0.2640451 | 45 | ACAD8/PLA2G15/HAL/NAGK/MFSD2A/HEXB/GADL1/AMDHD2/HGD/ABHD16A/AMACR/NPL/CBS/ACOXL/AKR1D1/MTHFS/OGDH/ALDH4A1/ENOSF1/FAH/TGFB1/CYP4F3/STAB2/ACADM/HIBADH/AGXT/ACACB/ACOX2/LYVE1/HOGA1/ADO/BCKDHA/ACSF3/MAT1A/HMGCL/PCK2/CRYM/ACAT1/ADTRP/CPT1A/LPIN1/HNMT/LYPLA2/ACADVL/CEMIP2 |
| Biological Process | GO:0046395 | carboxylic acid catabolic process                                     | 45/2279 | 282/18866 | 0.0308371 | 0.2918156 | 0.2640451 | 45 | ACAD8/PLA2G15/HAL/NAGK/MFSD2A/HEXB/GADL1/AMDHD2/HGD/ABHD16A/AMACR/NPL/CBS/ACOXL/AKR1D1/MTHFS/OGDH/ALDH4A1/ENOSF1/FAH/TGFB1/CYP4F3/STAB2/ACADM/HIBADH/AGXT/ACACB/ACOX2/LYVE1/HOGA1/ADO/BCKDHA/ACSF3/MAT1A/HMGCL/PCK2/CRYM/ACAT1/ADTRP/CPT1A/LPIN1/HNMT/LYPLA2/ACADVL/CEMIP2 |
| Biological Process | GO:0051591 | response to cAMP                                                      | 18/2279 | 94/18866  | 0.0312639 | 0.2952667 | 0.2671678 | 18 | BSG/KCNE1/ITPR2/RAP1B/SLC8A1/APP/FDX1/CRHBP/RAPGEF2/DGKQ/AQP1/AGXT/KCNQ1/PER1/SREBF1/RELA/EZR/AQP9                                                                                                                                                                         |
| Biological Process | GO:0060349 | bone morphogenesis                                                    | 18/2279 | 94/18866  | 0.0312639 | 0.2952667 | 0.2671678 | 18 | CSGALNACT1/FOXN3/MEF2D/LRP5L/SKI/CHSY1/ANXA6/TGFBR2/ALPL/POC1A/RARA/POR/RARG/BMPR1B/RUNX2/MEF2C/NPPC/LTF                                                                                                                                                                   |
| Biological Process | GO:0008645 | hexose transmembrane transport                                        | 21/2279 | 114/18866 | 0.0314307 | 0.2960806 | 0.2679043 | 21 | PRKAG2/SLC2A5/MIR143/PIK3R1/SLC2A14/TNF/GRB10/SLC2A9/ZDHHC7/HNF1A/PRKCB/SLC1A2/HK2/PRKCI/NFE2L2/SORT1/SLC5A10/SLC2A1/RTN2/ASPSR1/CLTCL1                                                                                                                                    |
| Biological Process | GO:0019915 | lipid storage                                                         | 16/2279 | 81/18866  | 0.0314436 | 0.2960806 | 0.2679043 | 16 | PNPLA2/EHD1/PPARG/TMEM159/HEXB/TNF/ABCG1/NR1H2/ITGB3/ABCA1/ACACB/FTO/ABHD5/DYSF/CDS2/BSCL2                                                                                                                                                                                 |



|                    |            |                                                               |         |           |           |           |           |    |                                                                                                                                                                                                                                                                                                                                                                                                                                        |
|--------------------|------------|---------------------------------------------------------------|---------|-----------|-----------|-----------|-----------|----|----------------------------------------------------------------------------------------------------------------------------------------------------------------------------------------------------------------------------------------------------------------------------------------------------------------------------------------------------------------------------------------------------------------------------------------|
| Biological Process | GO:0051279 | regulation of release of sequestered calcium ion into cytosol | 16/2279 | 81/18866  | 0.0314436 | 0.2960806 | 0.2679043 | 16 | PDE4D/CASQ2/CACNA1C/SLC8A1/UBASH3B/JSRP1/PTPN6/P2RY6/MYO5A/HTT/GSTO1/PRKCE/F2R/ANK2/PLCG1/CASQ1                                                                                                                                                                                                                                                                                                                                        |
| Biological Process | GO:0070527 | platelet aggregation                                          | 13/2279 | 62/18866  | 0.0319746 | 0.3004854 | 0.2718899 | 13 | CD9/PRKCA/UBASH3B/MYL12A/MYH9/ITGA2B/PTPN6/ILK/HBB/BLK/ITGB3/ACTG1/TYRO3                                                                                                                                                                                                                                                                                                                                                               |
| Biological Process | GO:0140115 | export across plasma membrane                                 | 13/2279 | 62/18866  | 0.0319746 | 0.3004854 | 0.2718899 | 13 | KCNE1/ABCC1/FXYD2/FXYD1/SLC8A1/ABCC2/OSCP1/RALBP1/ABCA1/SLC22A5/KCNQ1/ANO6/PDZK1                                                                                                                                                                                                                                                                                                                                                       |
| Biological Process | GO:0006066 | alcohol metabolic process                                     | 59/2279 | 385/18866 | 0.0320789 | 0.3011646 | 0.2725044 | 59 | PNPLA2/GFI1/OSBPL5/SYNJ2/RXRA/SPTLC2/IDI1/INPP5A/INPP5D/DHRS9/LIPC/VDR/ITPKB/MBTPS1/TNF/ALDH2/ABCG1/HDLBP/PGP/AKR1D1/INPP4A/APP/NUDT3/ACSS1/P2RY6/FGFR1/SPHK2/FDX1/RDH10/HRH1/SULT1A2/DGKQ/POR/ABCA1/GNB3/ACACB/INPP5E/PLCB1/CAT/ACSS2/IMPA2/NPC1/SGPP1/SGPP2/ACACA/LMF1/PCK2/DYSF/HMGCS1/SCD/SREBF1/PLCG1/PLCD3/ALDH1A2/DPAGT1/ACADVL/PRKAA1/IP6K1/PLPP3                                                                              |
| Biological Process | GO:0016241 | regulation of macroautophagy                                  | 30/2279 | 176/18866 | 0.0321103 | 0.3011646 | 0.2725044 | 30 | RPTOR/PRKAG2/SPTLC2/ULK1/ERN1/VPS13D/RHEB/LARP1/USP36/PIP4K2A/VPS26B/ATP6V1B2/FEZ2/PRKAB1/UVRAG/SMURF1/RUFY4/CLEC16A/HTT/TBC1D14/NPC1/ATP6V0B/NEDD4/TSC2/NPRL2/PRKAA1/STING1/PRKN/ATP6V0C/ATP6V1C1                                                                                                                                                                                                                                     |
| Biological Process | GO:0030218 | erythrocyte differentiation                                   | 22/2279 | 121/18866 | 0.0321485 | 0.3012254 | 0.2725594 | 22 | MAEA/KLF1/ZFPM1/INPP5D/TRIM10/HIPK2/SLC11A2/BRD1/TMOD3/SP3/ALAS1/SFXN1/ETS1/ADD1/RB1/EPAS1/EPB42/KAT7/INHBA/ERCC2/MB/TMEM14C                                                                                                                                                                                                                                                                                                           |
| Biological Process | GO:0000086 | G2/M transition of mitotic cell cycle                         | 41/2279 | 254/18866 | 0.0322035 | 0.3014438 | 0.2727571 | 41 | TRIM39/BLM/BRD4/DCTN1/CSNK1D/FOXN3/NDE1/DNM2/HUS1/DYNC1H1/TUBB4B/CEP135/APP/CDK14/CDC25A/CEP164/DCTN2/CEP78/CSNK1E/PSMF1/PPP2R1A/PLCB1/CCNH/PPP1CB/TUBA4A/TAOK3/SDCCAG8/ZFYVE19/ESRRB/CLSPN/PSMB7/FBXL6/FOXM1/CHEK2/BACH1/FBXW11/PHLDA1/CEP72/CCNY/NAE1/PSMD13                                                                                                                                                                         |
| Biological Process | GO:0051271 | negative regulation of cellular component movement            | 61/2279 | 400/18866 | 0.0324262 | 0.3032292 | 0.2743725 | 61 | SEMA6B/TACSTD2/ABR/CALR/CD9/PPARG/MIR140/KANK1/ARHGDI8/ZMYND8/ITGB1BP1/SPINT2/LDLRAD4/MIR199A1/TNF/MIR101-2/DUSP22/SEMA4A/PADI2/JUP/NAV3/BIN1/THBS1/SEMA4B/CSAR2/ACTN1/ACTN4/MIR24-2/ILK/SMAD7/MIA3/WNT11/WASL/NISCH/TGFB1/PTPRJ/SEMA4D/CNIH2/NF1/STK24/SRGAP1/BCR/PLCB1/NFE2L2/ENG/VASH1/MIR138-2/CDH1/BCL2/MIR199A2/NOTCH1/CORO1C/MEF2C/DUSP3/SP100/TRIB1/ADTRP/CERS2/PTPRU/NODAL/CX3CR1                                             |
| Biological Process | GO:0003012 | muscle system process                                         | 70/2279 | 467/18866 | 0.0327007 | 0.3054959 | 0.2764236 | 70 | HDAC4/PDE4D/ENO1/KCNE1/CTDP1/GSN/TTN/CASQ2/MIR143/MIR145/MYH11/MAP2K6/CACNA1C/AKAP13/FXYD1/TNFRSF1B/MYLK/SMAD3/SLC8A1/PRKCA/CTTN/MIR199A1/ANXA6/GJA5/MYL12A/TNNT3/JUP/BIN1/JSRP1/NOS1AP/MIR24-2/MIR23A/TNFRSF1A/SMAD7/PXN/ITGB5/SCN1A/PABPN1/TMOD3/CAMTA2/GHRL/CHRM2/SNTA1/TPCN2/KCNQ1/PDE9A/SNTB1/MYOM1/ANKRD2/MIR199A2/NOTCH1/MYOT/GSTO1/GNAO1/P2RX1/MEF2C/F2R/FOXO1/DYSF/ANK2/ASPH/TMOD1/INPP5F/MYL7/CASQ1/SMTN/LTB4R/DAPK3/MB/GRK2 |

|                    |            |                                                                 |         |           |           |           |           |    |                                                                                                                                                                                                                              |
|--------------------|------------|-----------------------------------------------------------------|---------|-----------|-----------|-----------|-----------|----|------------------------------------------------------------------------------------------------------------------------------------------------------------------------------------------------------------------------------|
| Biological Process | GO:0003176 | aortic valve development                                        | 8/2279  | 32/18866  | 0.0329472 | 0.307073  | 0.2778505 | 8  | TNFRSF1B/NFATC1/RBPJ/TNFRSF1A/TGFB1/RB1/NOTCH1/SLIT3                                                                                                                                                                         |
| Biological Process | GO:0050869 | negative regulation of B cell activation                        | 8/2279  | 32/18866  | 0.0329472 | 0.307073  | 0.2778505 | 8  | IL10/INPP5D/TNFAIP3/MNDA/TNFRSF21/BLK/BANK1/INHBA                                                                                                                                                                            |
| Biological Process | GO:0070228 | regulation of lymphocyte apoptotic process                      | 12/2279 | 56/18866  | 0.0329665 | 0.307073  | 0.2778505 | 12 | FOXP1/IL10/CCL5/HSH2D/PTCRA/DOCK8/RIPK3/ZC3H8/BLK/BCL10/FADD/GIMAP8                                                                                                                                                          |
| Biological Process | GO:0071887 | leukocyte apoptotic process                                     | 20/2279 | 108/18866 | 0.0334101 | 0.3082117 | 0.2788809 | 20 | FOXP1/IL10/PIK3CD/ITPKB/CCL5/HSH2D/RIPK1/PTCRA/TNFRSF21/DOCK8/RAPGEF2/RIPK3/ZC3H8/BLK/BCL10/NOD2/MEF2C/TRAF3IP2/FADD/GIMAP8                                                                                                  |
| Biological Process | GO:0030178 | negative regulation of Wnt signaling pathway                    | 36/2279 | 219/18866 | 0.0335863 | 0.3082117 | 0.2788809 | 36 | CCDC88C/AMFR/VGLL4/UBAC2/NFATC1/CUL3/GRB10/TCF7L2/LIMD1/HDAC1/LATS2/WNT11/KREMEN1/AXIN1/TLE1/WWTR1/TMEM64/WNT5B/STK3/PSMF1/RNF213/KREMEN2/NXN/PSMB7/NOTCH1/TSC2/FOXO1/CHD8/CYLD/ANKRD6/PTPRU/PSMD13/TSKU/NPHP4/TMEM131L/PRKN |
| Biological Process | GO:0002029 | desensitization of G protein-coupled receptor signaling pathway | 6/2279  | 21/18866  | 0.0337006 | 0.3082117 | 0.2788809 | 6  | ARRB1/DNM2/GIPR/ARRB2/DNM1/GRK2                                                                                                                                                                                              |
| Biological Process | GO:0003177 | pulmonary valve development                                     | 6/2279  | 21/18866  | 0.0337006 | 0.3082117 | 0.2788809 | 6  | TNFRSF1B/GJA5/NFATC1/RBPJ/TNFRSF1A/NOTCH1                                                                                                                                                                                    |
| Biological Process | GO:0016973 | poly(A)+ mRNA export from nucleus                               | 6/2279  | 21/18866  | 0.0337006 | 0.3082117 | 0.2788809 | 6  | NXF1/PABPN1/ENY2/NUP93/HHEX/PCID2                                                                                                                                                                                            |
| Biological Process | GO:0022401 | negative adaptation of signaling pathway                        | 6/2279  | 21/18866  | 0.0337006 | 0.3082117 | 0.2788809 | 6  | ARRB1/DNM2/GIPR/ARRB2/DNM1/GRK2                                                                                                                                                                                              |

|                    |            |                                                                        |         |          |           |           |           |    |                                                                      |
|--------------------|------------|------------------------------------------------------------------------|---------|----------|-----------|-----------|-----------|----|----------------------------------------------------------------------|
| Biological Process | GO:0036507 | protein demannosylation                                                | 6/2279  | 21/18866 | 0.0337006 | 0.3082117 | 0.2788809 | 6  | AMFR/EDEM1/DERL2/EDEM2/MAN1C1/MARCHF6                                |
| Biological Process | GO:0036508 | protein alpha-1,2-demannosylation                                      | 6/2279  | 21/18866 | 0.0337006 | 0.3082117 | 0.2788809 | 6  | AMFR/EDEM1/DERL2/EDEM2/MAN1C1/MARCHF6                                |
| Biological Process | GO:0043371 | negative regulation of CD4-positive, alpha-beta T cell differentiation | 6/2279  | 21/18866 | 0.0337006 | 0.3082117 | 0.2788809 | 6  | RUNX1/LOXL3/SMAD7/ZBTB7B/HLX/RUNX3                                   |
| Biological Process | GO:0060216 | definitive hemopoiesis                                                 | 6/2279  | 21/18866 | 0.0337006 | 0.3082117 | 0.2788809 | 6  | ZFPM1/LYL1/SP3/BCR/HOXA9/MEIS1                                       |
| Biological Process | GO:0071397 | cellular response to cholesterol                                       | 6/2279  | 21/18866 | 0.0337006 | 0.3082117 | 0.2788809 | 6  | GPLD1/MLC1/ABCA1/GRAMD1A/HMGCS1/INHBA                                |
| Biological Process | GO:0080182 | histone H3-K4 trimethylation                                           | 6/2279  | 21/18866 | 0.0337006 | 0.3082117 | 0.2788809 | 6  | WDR82/KMT2D/SETD1B/SETD1A/TET2/ZNF335                                |
| Biological Process | GO:0090201 | negative regulation of release of cytochrome c from mitochondria       | 6/2279  | 21/18866 | 0.0337006 | 0.3082117 | 0.2788809 | 6  | PAM16/CLU/NOL3/ARRB2/BCL2L1/PRKN                                     |
| Biological Process | GO:0014009 | glial cell proliferation                                               | 11/2279 | 50/18866 | 0.0337159 | 0.3082117 | 0.2788809 | 11 | CREB1/MYB/SKI/LGI4/TNF/CSF1R/CLU/PRKCH/PRKCI/NOTCH1/CERS2            |
| Biological Process | GO:0046850 | regulation of bone remodeling                                          | 11/2279 | 50/18866 | 0.0337159 | 0.3082117 | 0.2788809 | 11 | DEF8/INPP5D/PRKCA/UBASH3B/TNFAIP3/CSF1R/NF1/ITGB3/TMEM64/CSK/PLEKHM1 |

|                    |            |                                                  |         |           |           |           |           |    |                                                                                                                                                                                                                                                                                                                                                                                                                                                                |
|--------------------|------------|--------------------------------------------------|---------|-----------|-----------|-----------|-----------|----|----------------------------------------------------------------------------------------------------------------------------------------------------------------------------------------------------------------------------------------------------------------------------------------------------------------------------------------------------------------------------------------------------------------------------------------------------------------|
| Biological Process | GO:0070671 | response to interleukin-12                       | 11/2279 | 50/18866  | 0.0337159 | 0.3082117 | 0.2788809 | 11 | P4HB/IL10/RAP1B/SERPINB2/AIP/JAK1/PITPNA/PLCB1/RALA/CA1/GSTO1                                                                                                                                                                                                                                                                                                                                                                                                  |
| Biological Process | GO:0030278 | regulation of ossification                       | 35/2279 | 212/18866 | 0.0337976 | 0.3082117 | 0.2788809 | 35 | HDAC4/CEBPD/HDAC7/SKI/CHSY1/SMAD3/SLC8A1/SUFU/TNF/ZBTB16/RBP1/ILK/LIMD1/SMAD7/TGFB1/KREMEN1/SEMA4D/SMURF1/BMP1B/TMEM64/RUNX2/IL6R/KREMEN2/SGM2/MIR138-2/BCL2/NOTCH1/MEF2C/NPPC/LTF/CEBPB/ANO6/FAM20C/RFLNA/CCN4                                                                                                                                                                                                                                                |
| Biological Process | GO:0009150 | purine ribonucleotide metabolic process          | 61/2279 | 401/18866 | 0.0338805 | 0.3082117 | 0.2788809 | 61 | FOXP1/HDAC4/PDE4D/PRKAG2/AMPD3/ENO1/HK1/ADCY2/ACSL1/FAR2/TJP2/ADCY9/PFKFB4/ACOT13/SULT6B1/RAE1/CBFA2T3/ABHD14B/DHTKD1/APP/OGDH/NUDT3/ADPGK/ACOT7/VPS9D1/PGAM1/ACSS1/SPHK2/TGFB1/SULT1A2/SLC26A1/NUP93/ENO3/HK2/SEC13/ACACB/ACSS2/PDE9A/GUK1/ADCY4/ESRRB/PPCDC/PAPSS2/PKM/ACACA/ACSF3/AK2/GMPR2/AK5/HMGCL/NPPC/ACAT1/HMGCS1/SCD/TPST1/PFKFB3/SLC25A1/PANK4/IMPDH1/PRKAA1/ATP5PD                                                                                 |
| Biological Process | GO:0086005 | ventricular cardiac muscle cell action potential | 9/2279  | 38/18866  | 0.033931  | 0.3082117 | 0.2788809 | 9  | KCNE1/CACNA1C/GJA5/JUP/BIN1/NOS1AP/SNTA1/KCNQ1/ANK2                                                                                                                                                                                                                                                                                                                                                                                                            |
| Biological Process | GO:0017145 | stem cell division                               | 10/2279 | 44/18866  | 0.034098  | 0.3082117 | 0.2788809 | 10 | MIR145/LBH/ZBTB16/CUL3/FGFR1/WWTR1/NUMB/ESRRB/NOTCH1/ARHGEF2                                                                                                                                                                                                                                                                                                                                                                                                   |
| Biological Process | GO:0048489 | synaptic vesicle transport                       | 10/2279 | 44/18866  | 0.034098  | 0.3082117 | 0.2788809 | 10 | DNM2/RAB27A/CNIH2/KIF5C/DNM1/DNM3/AP3D1/MX1/DTNBP1/PRKN                                                                                                                                                                                                                                                                                                                                                                                                        |
| Biological Process | GO:0120009 | intermembrane lipid transfer                     | 10/2279 | 44/18866  | 0.034098  | 0.3082117 | 0.2788809 | 10 | OSBPL5/ABCG1/PLTP/PITPNM2/PITPNM1/PITPNA/ABCA1/PITPNC1/GRAMD1A/C2CD2L                                                                                                                                                                                                                                                                                                                                                                                          |
| Biological Process | GO:1903053 | regulation of extracellular matrix organization  | 10/2279 | 44/18866  | 0.034098  | 0.3082117 | 0.2788809 | 10 | TNFRSF1B/SMAD3/TNFRSF1A/TGFB1/ETS1/AEBP1/RB1/NOTCH1/CPB2/ADTRP                                                                                                                                                                                                                                                                                                                                                                                                 |
| Biological Process | GO:0051051 | negative regulation of transport                 | 72/2279 | 483/18866 | 0.0341367 | 0.3082117 | 0.2788809 | 72 | PRTN3/TRIM27/ABR/KCNE1/THADA/CASQ2/WWP2/MIR143/ANGPT1/TNFRSF1B/ITGB1BP1/RAP1B/CCR2/RAB11FIP1/FRMD4A/MIR199A1/SUFU/TNF/CD84/RHBDF2/TLR9/UBAC2/PACSIN2/BIN1/THBS1/COMT/ANKRD13B/GRB10/SNX3/GNAI2/HLA-F/MIR27A/TNFRSF1A/ANKRD13D/DERL2/CRHBP/ENY2/SLC43A2/PRKCB/CNIH2/NF1/NR1H2/ITGB3/ANKRD13A/GHRL/CAB39/CSK/BCR/KLF7/BCL2/MIR199A2/NOTCH1/GSTO1/CABP1/PRKCE/SP100/F2R/SLC43A1/NEDD4/DYSF/ARHGAP1/HECW2/SREBF1/ADTRP/CYFIP1/YWHAQ/CD33/INHBA/LIF/SVIP/CBARP/PRKN |

|                    |            |                                                                  |         |           |           |           |           |    |                                                                                                                                                                                                                                                                                                                                                                                                                                           |
|--------------------|------------|------------------------------------------------------------------|---------|-----------|-----------|-----------|-----------|----|-------------------------------------------------------------------------------------------------------------------------------------------------------------------------------------------------------------------------------------------------------------------------------------------------------------------------------------------------------------------------------------------------------------------------------------------|
| Biological Process | GO:0009259 | ribonucleotide metabolic process                                 | 63/2279 | 416/18866 | 0.0341557 | 0.3082117 | 0.2788809 | 63 | FOXK1/HDAC4/PDE4D/PRKAG2/AMPD3/ENO1/HK1/ADCY2/ACSL1/FAR2/TJP2/ADCY9/PFKFB4/ACOT13/SULT6B1/RAE1/CBFA2T3/ABHD14B/DHTKD1/APP/OGDH/NUDT3/ADPGK/ACOT7/VPS9D1/PGAM1/ACSS1/SPHK2/TGFB1/SULT1A2/SLC26A1/UCK2/NUP93/ENO3/HK2/SEC13/ACACB/ACSS2/PDE9A/GUK1/ADCY4/ESRRB/PPCDC/PAPSS2/PKM/ACACA/ACSF3/AK2/GMPR2/AK5/HMGCL/NPPC/ACAT1/HMGCS1/SCD/TPST1/PFKFB3/DHODH/SLC25A1/PANK4/IMPDH1/PRKAA1/ATP5PD                                                 |
| Biological Process | GO:0006096 | glycolytic process                                               | 21/2279 | 115/18866 | 0.0342295 | 0.3082117 | 0.2788809 | 21 | FOXK1/HDAC4/PRKAG2/ENO1/HK1/PFKFB4/RAE1/CBFA2T3/DHTKD1/APP/OGDH/ADPGK/PGAM1/NUP93/ENO3/HK2/SEC13/ESRRB/PKM/PFKFB3/PRKAA1                                                                                                                                                                                                                                                                                                                  |
| Biological Process | GO:0051480 | regulation of cytosolic calcium ion concentration                | 55/2279 | 357/18866 | 0.0342596 | 0.3082117 | 0.2788809 | 55 | TRPM2/PDE4D/C3AR1/CASQ2/ITPR2/LCK/CD55/CACNA1C/CCR2/SMAD3/SLC8A1/MIR199A1/UBASH3B/CDH23/FPR2/FPR1/ATP2B2/ITPR1/ACKR2/JSRP1/C5AR2/PTPN6/RASA3/GNAT2/P2RY6/CCR9/TMEM178A/MYO5A/GIPR/HTT/GHRL/PTPRC/TMEM64/CXCR1/NOL3/TPCN2/FIS1/BCL2/MIR199A2/GSTO1/P2RX1/LPAR2/PRKCE/F2R/S1PR4/GPR4/AGTR1/ANK2/CHERP/PLCG1/P2RX5/TRPV2/CASQ1/CX3CR1/SYNPO                                                                                                  |
| Biological Process | GO:0006903 | vesicle targeting                                                | 18/2279 | 95/18866  | 0.0343708 | 0.3082117 | 0.2788809 | 18 | CTSZ/SERPINA1/TGFA/STX5/CSNK1D/TRAPPC10/C17orf75/CUL3/TRAPPC9/CNIH2/CD59/SEC13/ANKRD28/SEC24C/TMED2/SEC31A/IRAG2/TRAPPC2                                                                                                                                                                                                                                                                                                                  |
| Biological Process | GO:0045638 | negative regulation of myeloid cell differentiation              | 18/2279 | 95/18866  | 0.0343708 | 0.3082117 | 0.2788809 | 18 | ZFPM1/INPP5D/PIK3R1/ITPKB/UBASH3B/ZBTB16/DLL1/RARA/TMEM178A/LILRB4/NF1/MEIS2/LRRC17/HOXA9/MEIS1/LTF/TRIB1/INHBA                                                                                                                                                                                                                                                                                                                           |
| Biological Process | GO:0048814 | regulation of dendrite morphogenesis                             | 18/2279 | 95/18866  | 0.0343708 | 0.3082117 | 0.2788809 | 18 | YWHAH/TNIK/CUX1/BAIAP2/ILK/SDC2/SEMA4D/RAPGEF2/SS18L2/SIPA1L1/DNM3/CDKL3/DNM1L/UBE3A/NEDD4/HECW2/CUX2/DBNL                                                                                                                                                                                                                                                                                                                                |
| Biological Process | GO:1903725 | regulation of phospholipid metabolic process                     | 18/2279 | 95/18866  | 0.0343708 | 0.3082117 | 0.2788809 | 18 | LPCAT1/PIK3R1/PIK3R6/FGR/FPR2/PIK3R5/FLT1/TGFB1/VAV2/ATG14/GNB3/PDGFB/MIR138-2/NOD2/PDGFRB/WDR81/VAV3/SLA2                                                                                                                                                                                                                                                                                                                                |
| Biological Process | GO:0048285 | organelle fission                                                | 71/2279 | 476/18866 | 0.0347852 | 0.3082117 | 0.2788809 | 71 | ARHGEF10/CALR/FZR1/TGFA/CTDP1/MAD1L1/TTN/TNKS/MOV10L1/NDE1/BRCA2/INF2/PRKCA/DNM2/NSMCE2/RCC1/CHAMP1/CUL3/EME1/CCDC8/MEIOB/CDC16/MIS12/DCTN2/FANCA/PRKCB/RNF212/TACC3/STAG1/NUMA1/PDGFB/PPP2R1A/PLCB1/MSTO1/DNM1/NEK6/CCNA1/FIS1/RB1/RAD21L1/DMC1/DNM3/DNM1L/CDC45/DIS3L2/PEX11B/CHEK2/ANAPC7/MIEF1/PDGFRB/SPAG5/HECW2/CDC14A/MX1/SLX4/TEX12/AURKAIP1/NDEL1/LPIN1/DHODH/LIF/KLHDC3/DAPK3/PSMD13/CDK13/PCID2/TERB2/PRKN/CYRIB/ABRAXAS1/SLF1 |
| Biological Process | GO:0002604 | regulation of dendritic cell antigen processing and presentation | 4/2279  | 11/18866  | 0.0348133 | 0.3082117 | 0.2788809 | 4  | SLC11A1/THBS1/NOD2/CD68                                                                                                                                                                                                                                                                                                                                                                                                                   |

|                    |            |                                                            |        |          |           |           |           |   |                            |
|--------------------|------------|------------------------------------------------------------|--------|----------|-----------|-----------|-----------|---|----------------------------|
| Biological Process | GO:0006054 | N-acetylneuraminate metabolic process                      | 4/2279 | 11/18866 | 0.0348133 | 0.3082117 | 0.2788809 | 4 | NAGK/AMDHD2/NPL/ST6GAL1    |
| Biological Process | GO:0006853 | carnitine shuttle                                          | 4/2279 | 11/18866 | 0.0348133 | 0.3082117 | 0.2788809 | 4 | PRKAG2/ACACB/ACACA/CPT1A   |
| Biological Process | GO:0008655 | pyrimidine-containing compound salvage                     | 4/2279 | 11/18866 | 0.0348133 | 0.3082117 | 0.2788809 | 4 | CDA/TK2/UCK2/TK1           |
| Biological Process | GO:0019852 | L-ascorbic acid metabolic process                          | 4/2279 | 11/18866 | 0.0348133 | 0.3082117 | 0.2788809 | 4 | GSTO1/SLC2A1/GSTO2/SLC23A1 |
| Biological Process | GO:0032754 | positive regulation of interleukin-5 production            | 4/2279 | 11/18866 | 0.0348133 | 0.3082117 | 0.2788809 | 4 | PRKCZ/PDE4D/NLRP3/RARA     |
| Biological Process | GO:0034115 | negative regulation of heterotypic cell-cell adhesion      | 4/2279 | 11/18866 | 0.0348133 | 0.3082117 | 0.2788809 | 4 | IL10/MBP/IL1RN/MYADM       |
| Biological Process | GO:0043097 | pyrimidine nucleoside salvage                              | 4/2279 | 11/18866 | 0.0348133 | 0.3082117 | 0.2788809 | 4 | CDA/TK2/UCK2/TK1           |
| Biological Process | GO:0045628 | regulation of T-helper 2 cell differentiation              | 4/2279 | 11/18866 | 0.0348133 | 0.3082117 | 0.2788809 | 4 | PRKCZ/NLRP3/RARA/HLX       |
| Biological Process | GO:0045945 | positive regulation of transcription by RNA polymerase III | 4/2279 | 11/18866 | 0.0348133 | 0.3082117 | 0.2788809 | 4 | RPTOR/ZC3H8/BRF1/CHD8      |

|                    |            |                                                                  |        |          |           |           |           |   |                             |
|--------------------|------------|------------------------------------------------------------------|--------|----------|-----------|-----------|-----------|---|-----------------------------|
| Biological Process | GO:0046950 | cellular ketone body metabolic process                           | 4/2279 | 11/18866 | 0.0348133 | 0.3082117 | 0.2788809 | 4 | BDH1/HMGCL/ACAT1/ACSS3      |
| Biological Process | GO:0048875 | chemical homeostasis within a tissue                             | 4/2279 | 11/18866 | 0.0348133 | 0.3082117 | 0.2788809 | 4 | LPCAT1/SFTPD/CTSH/EPAS1     |
| Biological Process | GO:0060368 | regulation of Fc receptor mediated stimulatory signaling pathway | 4/2279 | 11/18866 | 0.0348133 | 0.3082117 | 0.2788809 | 4 | CD226/PTPRJ/PTPRC/CSK       |
| Biological Process | GO:0060837 | blood vessel endothelial cell differentiation                    | 4/2279 | 11/18866 | 0.0348133 | 0.3082117 | 0.2788809 | 4 | CCM2/DLL1/RBPJ/NOTCH1       |
| Biological Process | GO:0070587 | regulation of cell-cell adhesion involved in gastrulation        | 4/2279 | 11/18866 | 0.0348133 | 0.3082117 | 0.2788809 | 4 | IL10/MBP/IL1RN/MYADM        |
| Biological Process | GO:0070778 | L-aspartate transmembrane transport                              | 4/2279 | 11/18866 | 0.0348133 | 0.3082117 | 0.2788809 | 4 | SLC1A5/SLC1A2/SLC1A6/SLC1A3 |
| Biological Process | GO:0071372 | cellular response to follicle-stimulating hormone stimulus       | 4/2279 | 11/18866 | 0.0348133 | 0.3082117 | 0.2788809 | 4 | POR/NOTCH1/HMGCS1/INHBA     |
| Biological Process | GO:0072110 | glomerular mesangial cell proliferation                          | 4/2279 | 11/18866 | 0.0348133 | 0.3082117 | 0.2788809 | 4 | PDGFD/IL6R/PDGFB/PDGFRB     |
| Biological Process | GO:0090193 | positive regulation of glomerulus development                    | 4/2279 | 11/18866 | 0.0348133 | 0.3082117 | 0.2788809 | 4 | PAX2/PDGFD/IL6R/PDGFB       |

|                    |            |                                                       |         |           |           |           |           |    |                                                                                                                                             |
|--------------------|------------|-------------------------------------------------------|---------|-----------|-----------|-----------|-----------|----|---------------------------------------------------------------------------------------------------------------------------------------------|
| Biological Process | GO:0090205 | positive regulation of cholesterol metabolic process  | 4/2279  | 11/18866  | 0.0348133 | 0.3082117 | 0.2788809 | 4  | ABCG1/POR/SREBF1/PRKAA1                                                                                                                     |
| Biological Process | GO:2000392 | regulation of lamellipodium morphogenesis             | 4/2279  | 11/18866  | 0.0348133 | 0.3082117 | 0.2788809 | 4  | RREB1/KANK1/ARHGEF7/CORO1C                                                                                                                  |
| Biological Process | GO:1902930 | regulation of alcohol biosynthetic process            | 16/2279 | 82/18866  | 0.0348405 | 0.3082117 | 0.2788809 | 16 | GFI1/IDI1/VDR/MBTPS1/TNF/ABCG1/P2RY6/HRH1/DGKQ/POR/ACACB/ACACA/HMGCS1/SCD/SREBF1/PRKAA1                                                     |
| Biological Process | GO:0034101 | erythrocyte homeostasis                               | 23/2279 | 129/18866 | 0.0354514 | 0.3124574 | 0.2827226 | 23 | MAEA/KLF1/ZFPM1/AMPD3/INPP5D/TRIM10/HIPK2/SLC11A2/BRD1/TMOD3/SP3/ALAS1/SFXN1/ETS1/ADD1/RB1/EPAS1/EPB42/KAT7/INHBA/ERCC2/MB/TMEM14C          |
| Biological Process | GO:0110020 | regulation of actomyosin structure organization       | 19/2279 | 102/18866 | 0.0354992 | 0.3124574 | 0.2827226 | 19 | ARHGEF10/TACSTD2/AKAP13/ITGB1BP1/PIK3R1/SMAD3/SH3PXD2B/ARAP1/SYNPO2L/PXN/WNT11/PPFIA1/PFN1/ACTG1/MIR138-2/ARHGEF10L/ARHGEF18/MEF2C/ARHGEF15 |
| Biological Process | GO:0002523 | leukocyte migration involved in inflammatory response | 5/2279  | 16/18866  | 0.0356493 | 0.3124574 | 0.2827226 | 5  | ELANE/S100A8/FUT7/JAM3/ITGB2                                                                                                                |
| Biological Process | GO:0010452 | histone H3-K36 methylation                            | 5/2279  | 16/18866  | 0.0356493 | 0.3124574 | 0.2827226 | 5  | BRD4/SETD2/PAXIP1/NSD3/NSD2                                                                                                                 |
| Biological Process | GO:0030214 | hyaluronan catabolic process                          | 5/2279  | 16/18866  | 0.0356493 | 0.3124574 | 0.2827226 | 5  | HEXB/TGFB1/STAB2/LYVE1/CEMIP2                                                                                                               |
| Biological Process | GO:0046134 | pyrimidine nucleoside biosynthetic process            | 5/2279  | 16/18866  | 0.0356493 | 0.3124574 | 0.2827226 | 5  | CDA/TK2/UCK2/DHODH/TK1                                                                                                                      |



|                    |            |                                                                |         |           |           |           |           |    |                                                                                                                                                                                                                                                                                                                                                                                           |
|--------------------|------------|----------------------------------------------------------------|---------|-----------|-----------|-----------|-----------|----|-------------------------------------------------------------------------------------------------------------------------------------------------------------------------------------------------------------------------------------------------------------------------------------------------------------------------------------------------------------------------------------------|
| Biological Process | GO:0048820 | hair follicle maturation                                       | 5/2279  | 16/18866  | 0.0356493 | 0.3124574 | 0.2827226 | 5  | RBP1/CDH3/MYO5A/NF1/ERCC2                                                                                                                                                                                                                                                                                                                                                                 |
| Biological Process | GO:0070863 | positive regulation of protein exit from endoplasmic reticulum | 5/2279  | 16/18866  | 0.0356493 | 0.3124574 | 0.2827226 | 5  | SORL1/TM9SF4/TMEM30A/EDEM1/EDEM2                                                                                                                                                                                                                                                                                                                                                          |
| Biological Process | GO:1903358 | regulation of Golgi organization                               | 5/2279  | 16/18866  | 0.0356493 | 0.3124574 | 0.2827226 | 5  | STX5/DNM2/PDE4DIP/USP6NL/ARMH3                                                                                                                                                                                                                                                                                                                                                            |
| Biological Process | GO:1903729 | regulation of plasma membrane organization                     | 5/2279  | 16/18866  | 0.0356493 | 0.3124574 | 0.2827226 | 5  | GSN/DNM2/MYH9/ASAP1/WASL                                                                                                                                                                                                                                                                                                                                                                  |
| Biological Process | GO:0030198 | extracellular matrix organization                              | 60/2279 | 395/18866 | 0.0360132 | 0.315356  | 0.2853453 | 60 | ITGAE/CSGALNACT1/ELANE/CTSG/TIMP2/BSG/COL23A1/MFAP4/SPOCK2/COL17A1/VIT/APBB2/CRISPLD2/MYH11/TNFRSF1B/SMAD3/TGFB1/SPINT2/COL4A2/COLQ/TNF/LOXL3/SH3PX D2B/THBS1/APP/ITGA2B/EGFLAM/TNFRSF1A/TNXB/COL12A1/ITGB5/TGFB1/NF1/ADAMTS13/JAM3/ADAMTSL5/DNAJB6/ITGB3/PDGFB/COL14A1/ETS1/ENG/ITGB2/CDH1/AEBP1/RB1 /NOTCH1/COL5A1/ST7/CPB2/COL28A1/ICAM5/ADTRP/LAMB3/BCL3/FLOT1/ITGB6/LOXL4/ERCC2/HAS3 |
| Biological Process | GO:0071383 | cellular response to steroid hormone stimulus                  | 34/2279 | 206/18866 | 0.0361365 | 0.3161441 | 0.2860584 | 34 | RXRA/FOXP1/CALR/NCOR2/RUNX1/URI1/AKAP13/YWHAH/PRMT2/LBH/ABCC2/PADI2/SMYD3/ZNF366/FECH/HDAC1/ZMIZ1/PHB/AXIN1/AQP1/KMT2D/ARRB2/ARNTL/NPC1/ESRRB/P ER1/UBE3A/NEDD4/PCK2/RNF14/FOXO1/ADTRP/NCOA4/NODAL                                                                                                                                                                                        |
| Biological Process | GO:0001935 | endothelial cell proliferation                                 | 33/2279 | 199/18866 | 0.0363359 | 0.3175965 | 0.2873726 | 33 | LRG1/RPTOR/NRP2/IL10/PPARG/ERN1/ITGB1BP1/PRKCA/TNF/EGFL7/MIR101-2/STAT5A/THBS1/AKT3/MIR24-2/MIR27A/MIR23A/FLT1/FGFR1/ZNF580/NF1/BMPER/ITGB3/GHRL/PDGFB/VASH1/MEF2C/AGTR1/DYSF/PPP1R16B/TNFSF12/PLCG1/ALDH1A2                                                                                                                                                                              |
| Biological Process | GO:0060193 | positive regulation of lipase activity                         | 15/2279 | 76/18866  | 0.0366841 | 0.318593  | 0.2882743 | 15 | PRKCZ/CCL5/FLT1/P2RY6/FGFR1/PHB/NR1H2/LPAR2/S1PR4/LMF1/ABHD5/AGTR1/PDGFRB/PLCG1/NTF4                                                                                                                                                                                                                                                                                                      |
| Biological Process | GO:0043535 | regulation of blood vessel endothelial cell migration          | 28/2279 | 164/18866 | 0.0367082 | 0.318593  | 0.2882743 | 28 | PPARG/MAP3K3/MIR143/HDAC7/ANGPT1/ITGB1BP1/PRKCA/MIR199A1/TNF/MIR101-2/STAT5A/JUP/THBS1/AKT3/MIR24-2/MIR27A/MIR23A/FGFR1/TGFB1/NF1/PDGFB/ETS1/NFE2L2/VASH1/MIR199A2/NOTCH1/MEF2C/PLCG1                                                                                                                                                                                                     |

|                    |            |                                                   |         |           |           |          |           |    |                                                                                                                                                                                                                                                                                                                                                                                                                                                 |
|--------------------|------------|---------------------------------------------------|---------|-----------|-----------|----------|-----------|----|-------------------------------------------------------------------------------------------------------------------------------------------------------------------------------------------------------------------------------------------------------------------------------------------------------------------------------------------------------------------------------------------------------------------------------------------------|
| Biological Process | GO:0050769 | positive regulation of neurogenesis               | 72/2279 | 485/18866 | 0.0369279 | 0.318593 | 0.2882743 | 72 | CPNE6/PLXNC1/TIMP2/AP2A1/PPARG/CYB5D2/CSNK1D/MYB/TMEM30A/ZMYND8/TNFRSF1B/CCR2/RHEB/TNF/CPNE5/ZEB2/ITSN1/BIN1/DISC1/CUX1/BAIAP2/SNX3/TCF12/ILK/HDAC1/CPNE1/FGFR1/TGFB1/PRKCH/SEMA4D/RAPGEF2/SMURF1/SS18L2/RARA/CPEB3/CAMK1D/NUMB/KDM4C/NCOA1/CDH4/CSNK1E/GRN/CREB3L2/ZNF335/PRKCI/NFE2L2/ARSB/NTRK1/BCL2/TCF3/NOTCH1/CDKL3/DNM1L/AVIL/MEF2C/SHANK2/SYT17/ARHGEF2/GDF6/ANKRD1/MARK2/CYFIP1/TRPV2/RELA/NDEL1/LIF/CX3CR1/CUX2/EIF4G1/DBNL/PRKN/P3H1 |
| Biological Process | GO:0006757 | ATP generation from ADP                           | 21/2279 | 116/18866 | 0.0372096 | 0.318593 | 0.2882743 | 21 | FOXK1/HDAC4/PRKAG2/ENO1/HK1/PFKFB4/RAE1/CBFA2T3/DHTKD1/APP/OGDH/ADPGK/PGAM1/NUP93/ENO3/HK2/SEC13/ESRRB/PKM/PFKFB3/PRKAA1                                                                                                                                                                                                                                                                                                                        |
| Biological Process | GO:0003416 | endochondral bone growth                          | 7/2279  | 27/18866  | 0.0373147 | 0.318593 | 0.2882743 | 7  | ANXA6/TGFBR2/POC1A/RARA/POR/RARG/NPPC                                                                                                                                                                                                                                                                                                                                                                                                           |
| Biological Process | GO:0010714 | positive regulation of collagen metabolic process | 7/2279  | 27/18866  | 0.0373147 | 0.318593 | 0.2882743 | 7  | MYB/TGFB1/ENG/ARRB2/F2R/PDGFRB/VSIR                                                                                                                                                                                                                                                                                                                                                                                                             |
| Biological Process | GO:0048799 | animal organ maturation                           | 7/2279  | 27/18866  | 0.0373147 | 0.318593 | 0.2882743 | 7  | PAX2/XYL1/SEMA4D/LTF/ANO6/ALDH1A2/RFLNA                                                                                                                                                                                                                                                                                                                                                                                                         |
| Biological Process | GO:0060544 | regulation of necroptotic process                 | 7/2279  | 27/18866  | 0.0373147 | 0.318593 | 0.2882743 | 7  | MIR101-2/RIPK1/RIPK3/ARHGEF2/CYLD/FADD/PELI1                                                                                                                                                                                                                                                                                                                                                                                                    |
| Biological Process | GO:0062098 | regulation of programmed necrotic cell death      | 7/2279  | 27/18866  | 0.0373147 | 0.318593 | 0.2882743 | 7  | MIR101-2/RIPK1/RIPK3/ARHGEF2/CYLD/FADD/PELI1                                                                                                                                                                                                                                                                                                                                                                                                    |
| Biological Process | GO:0090140 | regulation of mitochondrial fission               | 7/2279  | 27/18866  | 0.0373147 | 0.318593 | 0.2882743 | 7  | INF2/FIS1/DNM1L/MIEF1/DHODH/PRKN/CYRIB                                                                                                                                                                                                                                                                                                                                                                                                          |
| Biological Process | GO:0002090 | regulation of receptor internalization            | 12/2279 | 57/18866  | 0.0373303 | 0.318593 | 0.2882743 | 12 | ANGPT1/ARRB1/MIR199A1/ANKRD13B/ANKRD13D/NUMB/ITGB3/ANKRD13A/GSG1L/ARRB2/MIR199A2/FLOT1                                                                                                                                                                                                                                                                                                                                                          |

|                    |            |                                                                              |         |           |           |          |           |    |                                                                                                                                                                                                                                                                                                                                                                                           |
|--------------------|------------|------------------------------------------------------------------------------|---------|-----------|-----------|----------|-----------|----|-------------------------------------------------------------------------------------------------------------------------------------------------------------------------------------------------------------------------------------------------------------------------------------------------------------------------------------------------------------------------------------------|
| Biological Process | GO:0032615 | interleukin-12 production                                                    | 12/2279 | 57/18866  | 0.0373303 | 0.318593 | 0.2882743 | 12 | IRF8/FOXP1/IL10/IRF5/IL16/MEFV/TLR9/THBS1/SCIMP/TIGIT/PLCB1/ARRB2                                                                                                                                                                                                                                                                                                                         |
| Biological Process | GO:0097479 | synaptic vesicle localization                                                | 12/2279 | 57/18866  | 0.0373303 | 0.318593 | 0.2882743 | 12 | DNM2/RAB27A/SYN3/CNIH2/SYN2/KIF5C/DNM1/DNM3/AP3D1/MX1/DTNBP1/PRKN                                                                                                                                                                                                                                                                                                                         |
| Biological Process | GO:1903556 | negative regulation of tumor necrosis factor superfamily cytokine production | 12/2279 | 57/18866  | 0.0373303 | 0.318593 | 0.2882743 | 12 | TRIM27/IL10/MIR140/TNFAIP3/C5AR2/PTPN6/RARA/ARRB2/LTF/CD33/VSIR/ILRUN                                                                                                                                                                                                                                                                                                                     |
| Biological Process | GO:0043062 | extracellular structure organization                                         | 60/2279 | 396/18866 | 0.0376063 | 0.318593 | 0.2882743 | 60 | ITGAE/CSGALNACT1/ELANE/CTSG/TIMP2/BSG/COL23A1/MFAP4/SPOCK2/COL17A1/VIT/APBB2/CRISPLD2/MYH11/TNFRSF1B/SMAD3/TGFBI/SPINT2/COL4A2/COLQ/TNF/LOXL3/SH3PX D2B/THBS1/APP/ITGA2B/EGFLAM/TNFRSF1A/TNXB/COL12A1/ITGB5/TGFB1/NF1/ADAMTS13/JAM3/ADAMTSL5/DNAJB6/ITGB3/PDGFB/COL14A1/ETS1/ENG/ITGB2/CDH1/AEBP1/RB1 /NOTCH1/COL5A1/ST7/CPB2/COL28A1/ICAM5/ADTRP/LAMB3/BCL3/FLOT1/ITGB6/LOXL4/ERCC2/HAS3 |
| Biological Process | GO:0006006 | glucose metabolic process                                                    | 35/2279 | 214/18866 | 0.0381127 | 0.318593 | 0.2882743 | 35 | MAEA/FOXK1/ENO1/HK1/C1QTNF3/GPLD1/TNF/PGP/ADPGK/PGAM1/PC/NISCH/DGKQ/ENO3/DYRK2/HK2/GHRL/GNB3/ACACB/PPP1CB/ESRRB/PER2/PKM/PCK2/FOXO1/NCOA2/SOG A1/KBTBD2/WDTTC1/CPT1A/SLC25A1/PRKAA1/PRKN/SDHAF3/RUBCNL                                                                                                                                                                                    |
| Biological Process | GO:0032873 | negative regulation of stress-activated MAPK cascade                         | 11/2279 | 51/18866  | 0.0384621 | 0.318593 | 0.2882743 | 11 | HIPK3/TAOK3/MIR138-2/PER1/DUSP3/FOXM1/FOXO1/CYLD/EZR/MECOM/PRKN                                                                                                                                                                                                                                                                                                                           |
| Biological Process | GO:0070303 | negative regulation of stress-activated protein kinase signaling cascade     | 11/2279 | 51/18866  | 0.0384621 | 0.318593 | 0.2882743 | 11 | HIPK3/TAOK3/MIR138-2/PER1/DUSP3/FOXM1/FOXO1/CYLD/EZR/MECOM/PRKN                                                                                                                                                                                                                                                                                                                           |
| Biological Process | GO:1902893 | regulation of pri-miRNA transcription by RNA polymerase II                   | 11/2279 | 51/18866  | 0.0384621 | 0.318593 | 0.2882743 | 11 | HDAC4/IL10/PPARG/SMAD3/TNF/TGFB1/LILRB4/PDGFB/ETS1/SREBF1/RELA                                                                                                                                                                                                                                                                                                                            |
| Biological Process | GO:0001570 | vasculogenesis                                                               | 16/2279 | 83/18866  | 0.038497  | 0.318593 | 0.2882743 | 16 | MYO18B/RIN2/HDAC7/SETD2/EGFL7/CCM2/TGFBR2/ZMIZ1/TGFB1/RAPGEF2/ENG/NOTCH1/FOXM1/PDGFRB/TEAD2/PAXIP1                                                                                                                                                                                                                                                                                        |

|                    |            |                                                                   |         |           |           |          |           |    |                                                                                                                                                          |
|--------------------|------------|-------------------------------------------------------------------|---------|-----------|-----------|----------|-----------|----|----------------------------------------------------------------------------------------------------------------------------------------------------------|
| Biological Process | GO:0048041 | focal adhesion assembly                                           | 16/2279 | 83/18866  | 0.038497  | 0.318593 | 0.2882743 | 16 | ITGB1BP1/SMAD3/ARHGGEF7/CTTN/DUSP22/WHAMM/THBS1/ACTN1/PTPRJ/TESK2/ACTG1/BCR/BCL2/CORO1C/DUSP3/DAPK3                                                      |
| Biological Process | GO:0048644 | muscle organ morphogenesis                                        | 16/2279 | 83/18866  | 0.038497  | 0.318593 | 0.2882743 | 16 | ARID5B/ZFPM1/RXRA/TTN/MIR143/MIR145/MYLK/CCM2L/RBPJ/SMAD7/PAX7/TGFB1/ENG/NOTCH1/ANKRD1/LIF                                                               |
| Biological Process | GO:0032273 | positive regulation of protein polymerization                     | 24/2279 | 137/18866 | 0.0387024 | 0.318593 | 0.2882743 | 24 | TRIM27/DCTN1/GSN/CTTN/NCK2/WHAMM/BAIAP2L1/NAV3/CDC42EP1/BIN1/BAIAP2/WASL/FER/PFN1/CSF3/GMFB/NUMA1/NCKAP1/TPPP3/PRKCE/MYO1C/CYFIP1/GMFG/BAIAP2L2          |
| Biological Process | GO:1903038 | negative regulation of leukocyte cell-cell adhesion               | 24/2279 | 137/18866 | 0.0387024 | 0.318593 | 0.2882743 | 24 | IL10/MAD1L1/RUNX1/LAX1/LOXL3/SFTPD/DUSP22/PTPN6/MIR27A/SMAD7/TNFRSF21/MIA3/ZBTB7B/TIGIT/ZC3H8/DUSP3/HLX/CEBPB/RUNX3/ADTRP/PELI1/TMEM131L/VSIR/MARCFH7    |
| Biological Process | GO:0030593 | neutrophil chemotaxis                                             | 19/2279 | 103/18866 | 0.0387791 | 0.318593 | 0.2882743 | 19 | PDE4D/S100A8/C3AR1/PIK3CD/CSF3R/CCL5/C5AR2/PREX1/JAM3/CAMK1D/CCL20/CXCR1/ITGB2/DAPK2/DNM1L/DYSF/CCL22/VAV3/JAML                                          |
| Biological Process | GO:0002700 | regulation of production of molecular mediator of immune response | 25/2279 | 144/18866 | 0.0389768 | 0.318593 | 0.2882743 | 25 | PRKCZ/IL10/TNFRSF1B/NLRP3/IL1R1/CCR2/TNF/TRAFF2/TLR9/SPON2/CD226/HLA-F/SMAD7/SCIMP/TGFB1/SLC7A5/PTPRC/BCL10/NOD2/TP53BP1/IL18R1/TNFSF13/CD96/PAXIP1/NSD2 |
| Biological Process | GO:0050921 | positive regulation of chemotaxis                                 | 25/2279 | 144/18866 | 0.0389768 | 0.318593 | 0.2882743 | 25 | AZU1/CALR/C3AR1/IL16/CCR2/SMAD3/CCL5/CSF1R/FPR2/THBS1/DEFB124/FGFR1/TGFB1/ZNF580/PDGFD/CAMK1D/CXCL17/IL6R/PDGFB/DAPK2/DNM1L/PDGFRB/ANO6/DYSF/CCL27       |
| Biological Process | GO:0033028 | myeloid cell apoptotic process                                    | 8/2279  | 33/18866  | 0.0390394 | 0.318593 | 0.2882743 | 8  | MAEA/PIK3CD/ITPKB/CCL5/CLEC5A/NOD2/BCL2/MEF2C                                                                                                            |
| Biological Process | GO:0042339 | keratan sulfate metabolic process                                 | 8/2279  | 33/18866  | 0.0390394 | 0.318593 | 0.2882743 | 8  | HEXB/GALNS/CHST2/ST3GAL4/B4GALT3/ST3GAL2/B3GNT2/B4GAT1                                                                                                   |

|                    |            |                                                           |         |           |           |          |           |    |                                                                                                                                                                       |
|--------------------|------------|-----------------------------------------------------------|---------|-----------|-----------|----------|-----------|----|-----------------------------------------------------------------------------------------------------------------------------------------------------------------------|
| Biological Process | GO:0046627 | negative regulation of insulin receptor signaling pathway | 8/2279  | 33/18866  | 0.0390394 | 0.318593 | 0.2882743 | 8  | PRKCZ/KANK1/PTPRE/GRB10/PRKCB/TSC2/RELA/PRKAA1                                                                                                                        |
| Biological Process | GO:2000758 | positive regulation of peptidyl-lysine acetylation        | 8/2279  | 33/18866  | 0.0390394 | 0.318593 | 0.2882743 | 8  | ARRB1/RPS6KA4/SPHK2/PIH1D1/KAT7/LIF/PAXIP1/PRKAA1                                                                                                                     |
| Biological Process | GO:0035567 | non-canonical Wnt signaling pathway                       | 26/2279 | 151/18866 | 0.0391607 | 0.318593 | 0.2882743 | 26 | PDE6A/AP2A1/CSNK1D/CCDC88C/TNRC6B/VANG1/AGO1/NFATC1/PRICKLE2/TCF7L2/GNAT2/WNT11/AGO2/SMURF1/PFN1/CSNK1E/PSMF1/RNF213/PLCB1/ARRB2/DAAM1/PSMB7/GNG2/GNAO1/ANKRD6/PSMD13 |
| Biological Process | GO:0001974 | blood vessel remodeling                                   | 10/2279 | 45/18866  | 0.0392617 | 0.318593 | 0.2882743 | 10 | ABR/MIR143/CRB1/CCR2/RBPJ/TGFB1/BCR/MEF2C/EPAS1/LIF                                                                                                                   |
| Biological Process | GO:0043090 | amino acid import                                         | 10/2279 | 45/18866  | 0.0392617 | 0.318593 | 0.2882743 | 10 | SLC1A5/SLC43A2/SLC1A2/SLC7A5/SLC1A6/PER2/SLC1A3/SLC43A1/SLC7A8/SLC7A1                                                                                                 |
| Biological Process | GO:0043114 | regulation of vascular permeability                       | 10/2279 | 45/18866  | 0.0392617 | 0.318593 | 0.2882743 | 10 | AZU1/ABR/TJP2/ANGPT1/MIR23A/TGFB1/PTPRJ/HRH1/BCR/GPR4                                                                                                                 |
| Biological Process | GO:0045214 | sarcomere organization                                    | 10/2279 | 45/18866  | 0.0392617 | 0.318593 | 0.2882743 | 10 | TTN/CASQ2/AKAP13/TNNT3/SYNPO2L/ACTG1/WDR1/MEF2C/ANKRD1/CASQ1                                                                                                          |
| Biological Process | GO:0045616 | regulation of keratinocyte differentiation                | 10/2279 | 45/18866  | 0.0392617 | 0.318593 | 0.2882743 | 10 | RUNX1/VDR/PRKCH/GRHL2/NUMA1/SGPP1/NOTCH1/AQP3/ZBED2/MACROH2A2                                                                                                         |
| Biological Process | GO:0052372 | modulation by symbiont of entry into host                 | 10/2279 | 45/18866  | 0.0392617 | 0.318593 | 0.2882743 | 10 | TRIM27/P4HB/TRIM38/GSN/TRIM8/TRIM10/SNX3/FCN1/TRIM5/TRIM26                                                                                                            |

|                    |            |                                                        |         |           |           |          |           |    |                                                                                                                                                                                                                                                                                                                                                                                |
|--------------------|------------|--------------------------------------------------------|---------|-----------|-----------|----------|-----------|----|--------------------------------------------------------------------------------------------------------------------------------------------------------------------------------------------------------------------------------------------------------------------------------------------------------------------------------------------------------------------------------|
| Biological Process | GO:0098815 | modulation of excitatory postsynaptic potential        | 10/2279 | 45/18866  | 0.0392617 | 0.318593 | 0.2882743 | 10 | PRKCZ/SSH1/ZMYND8/BAIAP2/APP/NRXN1/SH3GL1/S1PR2/SHANK2/CUX2                                                                                                                                                                                                                                                                                                                    |
| Biological Process | GO:1990138 | neuron projection extension                            | 29/2279 | 172/18866 | 0.0392664 | 0.318593 | 0.2882743 | 29 | SEMA6B/PRKCZ/CPNE6/NRP2/ULK1/CTTN/DNM2/CPNE5/CYFIP2/BCL11A/SEMA4A/RTN4/DISC1/SEMA4B/IFRD1/ILK/CPNE1/SEMA4D/SMURF1/CDH4/CDKL3/SYT17/SLIT3/CYFIP1/TRPV2/NDEL1/SLIT1/DBNL/PRKN                                                                                                                                                                                                    |
| Biological Process | GO:0062197 | cellular response to chemical stress                   | 55/2279 | 360/18866 | 0.0392776 | 0.318593 | 0.2882743 | 55 | TRPM2/P4HB/MPO/VRK2/IL10/PPARG/LCN2/PRR5L/MYB/RAD52/NCF4/MYLK/ZNF622/DNM2/TNF/TRAFF2/TNFAIP3/FBXO7/CAMKK2/MGAT3/MSRA/RIPK1/LRRC8C/NCF2/PXN/PAX2/ZNF580/FER/AQP1/RIPK3/AIFM2/STK24/PDGFD/CAB39/NOL3/CAT/ETS1/NFE2L2/ARNTL/ANKRD2/IL18RAP/BCL2/EPAS1/GLRX2/ARHGEF2/PDGFRB/SLC2A1/FOXO1/DYSF/RELA/BAG5/TXNRD2/SIRT3/PRKAA1/PRKN                                                   |
| Biological Process | GO:0001503 | ossification                                           | 62/2279 | 412/18866 | 0.0394828 | 0.318593 | 0.2882743 | 62 | CSGALNACT1/HDAC4/SBNO2/CEBPD/MEF2D/HDAC7/RUNX1/LRP5L/SKI/CHSY1/PAM16/SMAD3/SLC8A1/GPLD1/FGR/SUFU/TNF/SH3PXD2B/CLEC5A/ZBTB16/ALPL/RBP1/ILK/LIMD1/SAMD7/ASGR2/WNT11/XYL1/TGFB1/PHB/KREMEN1/SEMA4D/SMURF1/NF1/SP3/WWTR1/BMPR1B/TMEM64/RUNX2/IL6R/CAT/KREMEN2/SGMS2/SORT1/MIR138-2/BCL2/NOTCH1/MEF2C/FHL2/NPPC/LTF/CEBPB/RUNX3/ANO6/SND1/FAM20C/CDH11/SYNERIP/FBL/ERCC2/RFLNA/CCN4 |
| Biological Process | GO:0032412 | regulation of ion transmembrane transporter activity   | 42/2279 | 265/18866 | 0.0395441 | 0.318593 | 0.2882743 | 42 | PDE4D/KCNE1/THADA/CASQ2/WWP2/FXYD2/YWHAH/FXYD1/CCR2/DNM2/TLR9/TESC/JSRP1/AHNAK/RIPK1/APP/NOS1AP/ACTN4/P2RY6/SPHK2/CRHBP/CNIH2/HTR3A/MYO5A/HTT/CAB39/MAPK8IP2/GSG1L/GSTO1/MEF2C/SHANK2/PRKCE/NEDD4/DYSF/ANK2/HECW2/PDZK1/CASQ1/FGF14/CBARP/STIMATE/CRACR2A                                                                                                                      |
| Biological Process | GO:0014741 | negative regulation of muscle hypertrophy              | 9/2279  | 39/18866  | 0.0395462 | 0.318593 | 0.2882743 | 9  | CTDP1/MIR145/TNFRSF1B/SMAD3/MIR199A1/TNFRSF1A/MIR199A2/NOTCH1/FOXO1                                                                                                                                                                                                                                                                                                            |
| Biological Process | GO:0035886 | vascular associated smooth muscle cell differentiation | 9/2279  | 39/18866  | 0.0395462 | 0.318593 | 0.2882743 | 9  | MIR140/MIR145/NFATC2/NFATC1/EPC1/PDGFB/ENG/NOTCH1/DNMT1                                                                                                                                                                                                                                                                                                                        |
| Biological Process | GO:0042092 | type 2 immune response                                 | 9/2279  | 39/18866  | 0.0395462 | 0.318593 | 0.2882743 | 9  | PRKCZ/IL10/NLRP3/CCR2/RARA/NOD2/BCL6B/HLX/BCL3                                                                                                                                                                                                                                                                                                                                 |
| Biological Process | GO:0002821 | positive regulation of adaptive immune response        | 20/2279 | 110/18866 | 0.0396638 | 0.318593 | 0.2882743 | 20 | PRKCZ/SLC11A1/NLRP3/IL1R1/CCR2/TNF/TRAFF2/TNFSF13B/CD226/HLA-F/TGFB1/PTPRC/TP53BP1/IL18R1/HLX/TNFSF13/FADD/PAXIP1/CYRIB/NSD2                                                                                                                                                                                                                                                   |

|                    |            |                                                                                                 |         |           |           |          |           |    |                                                                                                                        |
|--------------------|------------|-------------------------------------------------------------------------------------------------|---------|-----------|-----------|----------|-----------|----|------------------------------------------------------------------------------------------------------------------------|
| Biological Process | GO:0090100 | positive regulation of transmembrane receptor protein serine/threonine kinase signaling pathway | 20/2279 | 110/18866 | 0.0396638 | 0.318593 | 0.2882743 | 20 | LRG1/MIR140/HIPK2/THBS1/RBPJ/UBE2O/ILK/TGFB1/NUP93/TGFB111/NUMA1/CREBBP/ENG/NOTCH1/RBPMS/GDF6/ZC3H3/ZNF423/INHBA/NODAL |
| Biological Process | GO:0002874 | regulation of chronic inflammatory response to antigenic stimulus                               | 2/2279  | 3/18866   | 0.0402391 | 0.318593 | 0.2882743 | 2  | IL10/TNF                                                                                                               |
| Biological Process | GO:0003138 | primary heart field specification                                                               | 2/2279  | 3/18866   | 0.0402391 | 0.318593 | 0.2882743 | 2  | WNT11/MEF2C                                                                                                            |
| Biological Process | GO:0003162 | atrioventricular node development                                                               | 2/2279  | 3/18866   | 0.0402391 | 0.318593 | 0.2882743 | 2  | MAML1/NOTCH1                                                                                                           |
| Biological Process | GO:0003192 | mitral valve formation                                                                          | 2/2279  | 3/18866   | 0.0402391 | 0.318593 | 0.2882743 | 2  | ZFPM1/NOTCH1                                                                                                           |
| Biological Process | GO:0003430 | growth plate cartilage chondrocyte growth                                                       | 2/2279  | 3/18866   | 0.0402391 | 0.318593 | 0.2882743 | 2  | TGFB2/RARG                                                                                                             |
| Biological Process | GO:0006447 | regulation of translational initiation by iron                                                  | 2/2279  | 3/18866   | 0.0402391 | 0.318593 | 0.2882743 | 2  | RXRA/TNF                                                                                                               |
| Biological Process | GO:0006679 | glucosylceramide biosynthetic process                                                           | 2/2279  | 3/18866   | 0.0402391 | 0.318593 | 0.2882743 | 2  | FA2H/PRKAA1                                                                                                            |
| Biological Process | GO:0009436 | glyoxylate catabolic process                                                                    | 2/2279  | 3/18866   | 0.0402391 | 0.318593 | 0.2882743 | 2  | AGXT/HOGA1                                                                                                             |

|                    |            |                                                                          |        |         |           |          |           |   |               |
|--------------------|------------|--------------------------------------------------------------------------|--------|---------|-----------|----------|-----------|---|---------------|
| Biological Process | GO:0010693 | negative regulation of alkaline phosphatase activity                     | 2/2279 | 3/18866 | 0.0402391 | 0.318593 | 0.2882743 | 2 | TNF/SEMA4D    |
| Biological Process | GO:0010908 | regulation of heparan sulfate proteoglycan biosynthetic process          | 2/2279 | 3/18866 | 0.0402391 | 0.318593 | 0.2882743 | 2 | TCF7L2/PXYLP1 |
| Biological Process | GO:0010909 | positive regulation of heparan sulfate proteoglycan biosynthetic process | 2/2279 | 3/18866 | 0.0402391 | 0.318593 | 0.2882743 | 2 | TCF7L2/PXYLP1 |
| Biological Process | GO:0021558 | trochlear nerve development                                              | 2/2279 | 3/18866 | 0.0402391 | 0.318593 | 0.2882743 | 2 | PHOX2A/HES3   |
| Biological Process | GO:0021852 | pyramidal neuron migration                                               | 2/2279 | 3/18866 | 0.0402391 | 0.318593 | 0.2882743 | 2 | DISC1/ZMIZ1   |
| Biological Process | GO:0030185 | nitric oxide transport                                                   | 2/2279 | 3/18866 | 0.0402391 | 0.318593 | 0.2882743 | 2 | HBB/AQP1      |
| Biological Process | GO:0030241 | skeletal muscle myosin thick filament assembly                           | 2/2279 | 3/18866 | 0.0402391 | 0.318593 | 0.2882743 | 2 | TTN/MYH11     |
| Biological Process | GO:0031134 | sister chromatid biorientation                                           | 2/2279 | 3/18866 | 0.0402391 | 0.318593 | 0.2882743 | 2 | CHAMP1/RB1    |
| Biological Process | GO:0032916 | positive regulation of transforming growth factor beta3 production       | 2/2279 | 3/18866 | 0.0402391 | 0.318593 | 0.2882743 | 2 | CREB1/SMAD3   |



|                    |            |                                                                                                                                 |        |         |           |          |           |   |                 |
|--------------------|------------|---------------------------------------------------------------------------------------------------------------------------------|--------|---------|-----------|----------|-----------|---|-----------------|
| Biological Process | GO:0035793 | positive regulation of metanephric mesenchymal cell migration by platelet-derived growth factor receptor-beta signaling pathway | 2/2279 | 3/18866 | 0.0402391 | 0.318593 | 0.2882743 | 2 | PDGFB/PDGFRB    |
| Biological Process | GO:0035879 | plasma membrane lactate transport                                                                                               | 2/2279 | 3/18866 | 0.0402391 | 0.318593 | 0.2882743 | 2 | SLC16A3/SLC16A1 |
| Biological Process | GO:0039656 | modulation by virus of host gene expression                                                                                     | 2/2279 | 3/18866 | 0.0402391 | 0.318593 | 0.2882743 | 2 | PABPN1/CPSF4    |
| Biological Process | GO:0045218 | zonula adherens maintenance                                                                                                     | 2/2279 | 3/18866 | 0.0402391 | 0.318593 | 0.2882743 | 2 | PLEKHA7/KIFC3   |
| Biological Process | GO:0045658 | regulation of neutrophil differentiation                                                                                        | 2/2279 | 3/18866 | 0.0402391 | 0.318593 | 0.2882743 | 2 | INPP5D/TRIB1    |
| Biological Process | GO:0045872 | positive regulation of rhodopsin gene expression                                                                                | 2/2279 | 3/18866 | 0.0402391 | 0.318593 | 0.2882743 | 2 | MFSD2A/NRL      |
| Biological Process | GO:0045914 | negative regulation of catecholamine metabolic process                                                                          | 2/2279 | 3/18866 | 0.0402391 | 0.318593 | 0.2882743 | 2 | COMT/ITGB2      |
| Biological Process | GO:0045963 | negative regulation of dopamine metabolic process                                                                               | 2/2279 | 3/18866 | 0.0402391 | 0.318593 | 0.2882743 | 2 | COMT/ITGB2      |
| Biological Process | GO:0051176 | positive regulation of sulfur metabolic process                                                                                 | 2/2279 | 3/18866 | 0.0402391 | 0.318593 | 0.2882743 | 2 | COMT/NFE2L2     |

|                    |            |                                                                            |        |         |           |          |           |   |                |
|--------------------|------------|----------------------------------------------------------------------------|--------|---------|-----------|----------|-----------|---|----------------|
| Biological Process | GO:0060003 | copper ion export                                                          | 2/2279 | 3/18866 | 0.0402391 | 0.318593 | 0.2882743 | 2 | ATOX1/ATP7B    |
| Biological Process | GO:0060313 | negative regulation of blood vessel remodeling                             | 2/2279 | 3/18866 | 0.0402391 | 0.318593 | 0.2882743 | 2 | ABR/BCR        |
| Biological Process | GO:0060399 | positive regulation of growth hormone receptor signaling pathway           | 2/2279 | 3/18866 | 0.0402391 | 0.318593 | 0.2882743 | 2 | GHRL/MBD5      |
| Biological Process | GO:0060671 | epithelial cell differentiation involved in embryonic placenta development | 2/2279 | 3/18866 | 0.0402391 | 0.318593 | 0.2882743 | 2 | SPINT2/GRHL2   |
| Biological Process | GO:0060672 | epithelial cell morphogenesis involved in placental branching              | 2/2279 | 3/18866 | 0.0402391 | 0.318593 | 0.2882743 | 2 | SPINT2/GRHL2   |
| Biological Process | GO:0060846 | blood vessel endothelial cell fate commitment                              | 2/2279 | 3/18866 | 0.0402391 | 0.318593 | 0.2882743 | 2 | DLL1/RBPJ      |
| Biological Process | GO:0060847 | endothelial cell fate specification                                        | 2/2279 | 3/18866 | 0.0402391 | 0.318593 | 0.2882743 | 2 | DLL1/RBPJ      |
| Biological Process | GO:0062232 | prostanoid catabolic process                                               | 2/2279 | 3/18866 | 0.0402391 | 0.318593 | 0.2882743 | 2 | ABHD16A/LYPLA2 |
| Biological Process | GO:0070105 | positive regulation of interleukin-6-mediated signaling pathway            | 2/2279 | 3/18866 | 0.0402391 | 0.318593 | 0.2882743 | 2 | GFI1/RIPK1     |

|                    |            |                                                                                                                        |        |         |           |          |           |   |               |
|--------------------|------------|------------------------------------------------------------------------------------------------------------------------|--------|---------|-----------|----------|-----------|---|---------------|
| Biological Process | GO:0071688 | striated muscle myosin thick filament assembly                                                                         | 2/2279 | 3/18866 | 0.0402391 | 0.318593 | 0.2882743 | 2 | TTN/MYH11     |
| Biological Process | GO:0071930 | negative regulation of transcription involved in G1/S transition of mitotic cell cycle                                 | 2/2279 | 3/18866 | 0.0402391 | 0.318593 | 0.2882743 | 2 | E2F7/RB1      |
| Biological Process | GO:0071955 | recycling endosome to Golgi transport                                                                                  | 2/2279 | 3/18866 | 0.0402391 | 0.318593 | 0.2882743 | 2 | NUMA1/TBC1D14 |
| Biological Process | GO:0097101 | blood vessel endothelial cell fate specification                                                                       | 2/2279 | 3/18866 | 0.0402391 | 0.318593 | 0.2882743 | 2 | DLL1/RBPJ     |
| Biological Process | GO:0097116 | gephyrin clustering involved in postsynaptic density assembly                                                          | 2/2279 | 3/18866 | 0.0402391 | 0.318593 | 0.2882743 | 2 | NRXN1/NRXN2   |
| Biological Process | GO:0097343 | riposome assembly                                                                                                      | 2/2279 | 3/18866 | 0.0402391 | 0.318593 | 0.2882743 | 2 | RIPK1/CYLD    |
| Biological Process | GO:1900238 | regulation of metanephric mesenchymal cell migration by platelet-derived growth factor receptor-beta signaling pathway | 2/2279 | 3/18866 | 0.0402391 | 0.318593 | 0.2882743 | 2 | PDGFB/PDGFRB  |
| Biological Process | GO:1901026 | riposome assembly involved in necroptotic process                                                                      | 2/2279 | 3/18866 | 0.0402391 | 0.318593 | 0.2882743 | 2 | RIPK1/CYLD    |
| Biological Process | GO:1901895 | negative regulation of ATPase-coupled calcium transmembrane transporter activity                                       | 2/2279 | 3/18866 | 0.0402391 | 0.318593 | 0.2882743 | 2 | THADA/TLR9    |

|                    |            |                                                                     |        |         |           |          |           |   |                |
|--------------------|------------|---------------------------------------------------------------------|--------|---------|-----------|----------|-----------|---|----------------|
| Biological Process | GO:1902044 | regulation of Fas signaling pathway                                 | 2/2279 | 3/18866 | 0.0402391 | 0.318593 | 0.2882743 | 2 | ZDHC7/SP100    |
| Biological Process | GO:1902948 | negative regulation of tau-protein kinase activity                  | 2/2279 | 3/18866 | 0.0402391 | 0.318593 | 0.2882743 | 2 | SORL1/RB1      |
| Biological Process | GO:1902988 | neurofibrillary tangle assembly                                     | 2/2279 | 3/18866 | 0.0402391 | 0.318593 | 0.2882743 | 2 | SORL1/CLU      |
| Biological Process | GO:1903614 | negative regulation of protein tyrosine phosphatase activity        | 2/2279 | 3/18866 | 0.0402391 | 0.318593 | 0.2882743 | 2 | MGAT5/GNAI2    |
| Biological Process | GO:1903615 | positive regulation of protein tyrosine phosphatase activity        | 2/2279 | 3/18866 | 0.0402391 | 0.318593 | 0.2882743 | 2 | PTPRC/CD33     |
| Biological Process | GO:1904958 | positive regulation of midbrain dopaminergic neuron differentiation | 2/2279 | 3/18866 | 0.0402391 | 0.318593 | 0.2882743 | 2 | CSNK1D/CSNK1E  |
| Biological Process | GO:1905246 | negative regulation of aspartic-type peptidase activity             | 2/2279 | 3/18866 | 0.0402391 | 0.318593 | 0.2882743 | 2 | SORL1/BIN1     |
| Biological Process | GO:1905344 | prostaglandin catabolic process                                     | 2/2279 | 3/18866 | 0.0402391 | 0.318593 | 0.2882743 | 2 | ABHD16A/LYPLA2 |
| Biological Process | GO:1905395 | response to flavonoid                                               | 2/2279 | 3/18866 | 0.0402391 | 0.318593 | 0.2882743 | 2 | FIS1/DNM1L     |

|                    |            |                                                                 |        |         |           |          |           |   |                |
|--------------------|------------|-----------------------------------------------------------------|--------|---------|-----------|----------|-----------|---|----------------|
| Biological Process | GO:1905616 | regulation of miRNA mediated inhibition of translation          | 2/2279 | 3/18866 | 0.0402391 | 0.318593 | 0.2882743 | 2 | AGO2/EIF4G1    |
| Biological Process | GO:1905618 | positive regulation of miRNA mediated inhibition of translation | 2/2279 | 3/18866 | 0.0402391 | 0.318593 | 0.2882743 | 2 | AGO2/EIF4G1    |
| Biological Process | GO:1990456 | mitochondrion-endoplasmic reticulum membrane tethering          | 2/2279 | 3/18866 | 0.0402391 | 0.318593 | 0.2882743 | 2 | PACS2/PDZD8    |
| Biological Process | GO:2000361 | regulation of prostaglandin-E synthase activity                 | 2/2279 | 3/18866 | 0.0402391 | 0.318593 | 0.2882743 | 2 | ITGB2/NOD2     |
| Biological Process | GO:2000363 | positive regulation of prostaglandin-E synthase activity        | 2/2279 | 3/18866 | 0.0402391 | 0.318593 | 0.2882743 | 2 | ITGB2/NOD2     |
| Biological Process | GO:2000409 | positive regulation of T cell extravasation                     | 2/2279 | 3/18866 | 0.0402391 | 0.318593 | 0.2882743 | 2 | CCR2/FADD      |
| Biological Process | GO:2000439 | positive regulation of monocyte extravasation                   | 2/2279 | 3/18866 | 0.0402391 | 0.318593 | 0.2882743 | 2 | CCR2/PDGFD     |
| Biological Process | GO:2000591 | positive regulation of metanephric mesenchymal cell migration   | 2/2279 | 3/18866 | 0.0402391 | 0.318593 | 0.2882743 | 2 | PDGFB/PDGFRB   |
| Biological Process | GO:2000640 | positive regulation of SREBP signaling pathway                  | 2/2279 | 3/18866 | 0.0402391 | 0.318593 | 0.2882743 | 2 | ZBTB7B/SPRING1 |

|                    |            |                                                      |         |           |           |           |           |    |                                                                                                                                                                                                          |
|--------------------|------------|------------------------------------------------------|---------|-----------|-----------|-----------|-----------|----|----------------------------------------------------------------------------------------------------------------------------------------------------------------------------------------------------------|
| Biological Process | GO:2000819 | regulation of nucleotide-excision repair             | 2/2279  | 3/18866   | 0.0402391 | 0.318593  | 0.2882743 | 2  | RAD52/KAT7                                                                                                                                                                                               |
| Biological Process | GO:2001255 | positive regulation of histone H3-K36 trimethylation | 2/2279  | 3/18866   | 0.0402391 | 0.318593  | 0.2882743 | 2  | BRD4/NSD3                                                                                                                                                                                                |
| Biological Process | GO:2001293 | malonyl-CoA metabolic process                        | 2/2279  | 3/18866   | 0.0402391 | 0.318593  | 0.2882743 | 2  | ACACB/ACACA                                                                                                                                                                                              |
| Biological Process | GO:0032835 | glomerulus development                               | 13/2279 | 64/18866  | 0.0403525 | 0.3189597 | 0.2886061 | 13 | ANGPT1/PAX2/PDGFD/KIRREL3/MTSS1/WWTR1/IL6R/PDGFB/BCL2/NOTCH1/MEF2C/GPR4/PDGFRB                                                                                                                           |
| Biological Process | GO:2000401 | regulation of lymphocyte migration                   | 13/2279 | 64/18866  | 0.0403525 | 0.3189597 | 0.2886061 | 13 | CCR2/CCL5/PADI2/APP/MIA3/DOCK8/WASL/RIPK3/CCL20/C10orf99/ADTRP/CCL27/FADD                                                                                                                                |
| Biological Process | GO:0014015 | positive regulation of gliogenesis                   | 15/2279 | 77/18866  | 0.0406594 | 0.3197425 | 0.2893144 | 15 | PPARG/MYB/TNFRSF1B/CCR2/RHEB/TNF/BIN1/HDAC1/TGFB1/PRKCH/PRKCI/NOTCH1/RELA/LIF/CX3CR1                                                                                                                     |
| Biological Process | GO:0072522 | purine-containing compound biosynthetic process      | 34/2279 | 208/18866 | 0.0407587 | 0.3197425 | 0.2893144 | 34 | PRKAG2/RCVRN/AMPD3/ENO1/ADCY2/ACSL1/ADCY9/ACOT7/VPS9D1/ACSS1/SPHK2/TGFB1/SLC26A1/ACACB/ACSS2/PNP/GUK1/ADCY4/MTHFD1/PPCDC/PAPSS2/PKM/ACACA/ACSF3/AK2/GMPR2/AK5/NPPC/ACAT1/SCD/SLC25A1/PANK4/IMPDH1/ATP5PD |
| Biological Process | GO:1901184 | regulation of ERBB signaling pathway                 | 18/2279 | 97/18866  | 0.0412563 | 0.3197425 | 0.2893144 | 18 | TGFA/SH3TC2/ARHGEF7/NCK2/DOK1/RHBDF2/RTN4/ARAP1/APP/RBPJ/EPS15L1/FER/PTPRJ/PDE6H/DGKD/DUSP3/EPS15/MVB12A                                                                                                 |
| Biological Process | GO:0046390 | ribose phosphate biosynthetic process                | 32/2279 | 194/18866 | 0.0413438 | 0.3197425 | 0.2893144 | 32 | PRKAG2/AMPD3/ENO1/ADCY2/ACSL1/ADCY9/ACOT7/VPS9D1/ACSS1/SPHK2/TGFB1/SLC26A1/UCK2/ACACB/ACSS2/GUK1/ADCY4/PPCDC/PAPSS2/PKM/ACACA/ACSF3/AK2/AK5/NPPC/ACAT1/SCD/DHODH/SLC25A1/PANK4/IMPDH1/ATP5PD             |

|                    |            |                                                      |         |           |           |           |           |    |                                                                                                                                                                                                                                                                                                                                                                                                     |
|--------------------|------------|------------------------------------------------------|---------|-----------|-----------|-----------|-----------|----|-----------------------------------------------------------------------------------------------------------------------------------------------------------------------------------------------------------------------------------------------------------------------------------------------------------------------------------------------------------------------------------------------------|
| Biological Process | GO:0006766 | vitamin metabolic process                            | 23/2279 | 131/18866 | 0.0413685 | 0.3197425 | 0.2893144 | 23 | GFI1/ABCC1/VDR/MTHFD1L/TNF/PLTP/MTHFS/FGFR1/PC/CYP4F3/RDH10/SLC19A1/CD320/PDXK/MTHFD1/GSTO1/SLC52A2/SLC2A1/ALDH1A2/GSTO2/SLC23A1/AOX1/ACP3                                                                                                                                                                                                                                                          |
| Biological Process | GO:0006979 | response to oxidative stress                         | 68/2279 | 458/18866 | 0.0414612 | 0.3197425 | 0.2893144 | 68 | TRPM2/P4HB/MPO/VRK2/IL10/LCN2/PRR5L/MYB/RAD52/NCF4/SLC8A1/ZNF622/LPO/DNM2/TNF/TRAF2/TNFAIP3/FBXO7/MSRB2/ABCC2/CAMKK2/MGAT3/MSRA/RRM2B/RIPK1/AP<br>P/NDUFS2/NCF2/PXN/PAX2/MTF1/ZNF580/FER/HBB/AQP1/NDUFS8/RIPK3/AIFM2/STK24/PDGFD/ATOX1/NOL3/CAT/ETS1/NFE2L2/ACOX2/ARNTL/ANKRD2/IL18RAP/CA3/BCL2/RBPM<br>S/EPAS1/UBE3A/GLRX2/PDGFRB/FOXO1/ERCC1/RELA/SGK2/BAG5/XPA/TXNRD2/ERCC2/SIRT3/MB/PRKAA1/PRKN |
| Biological Process | GO:0002285 | lymphocyte activation<br>involved in immune response | 31/2279 | 187/18866 | 0.0415825 | 0.3197425 | 0.2893144 | 31 | HLA-DMB/IL27/PRKCZ/ZFPM1/FOXP1/IL10/MYB/SLC11A1/NLRP3/LOXL3/SEMA4A/RAB27A/DLL1/HLA-<br>F/SMAD7/UNG/LY9/ZBTB7B/TGFB1/RARA/PGLYRP1/PTPRC/DOCK10/TP53BP1/IL18R1/HLX/ERCC1/TNFSF13/BCL3/PAXIP1/NSD2                                                                                                                                                                                                     |
| Biological Process | GO:0048639 | positive regulation of<br>developmental growth       | 31/2279 | 187/18866 | 0.0415825 | 0.3197425 | 0.2893144 | 31 | CPNE6/CREB1/MIR199A1/CPNE5/SH3PXD2B/TGFB2/DISC1/DLL1/RBP1/ILK/SMAD7/FGFR1/SEMA4D/SMURF1/GHRL/ACACB/CDH4/PLCB1/BCL2/MIR199A2/NOTCH1/MEF2C/SYT17/H<br>LX/CYFIP1/TRPV2/NDEL1/EZR/SPTBN4/DBNL/PRKN                                                                                                                                                                                                      |
| Biological Process | GO:0009165 | nucleotide biosynthetic<br>process                   | 42/2279 | 266/18866 | 0.0416634 | 0.3197425 | 0.2893144 | 42 | PRKAG2/RCVRN/AMPD3/ENO1/NADK/ADCY2/ACSL1/ADCY9/NMNAT3/RRM2B/ACOT7/VPS9D1/TK2/ACSS1/SPHK2/TGFB1/SLC26A1/UCK2/ACACB/ACSS2/PNP/GUK1/ADCY4/MTHFD1<br>/PPCDC/PAPSS2/PKM/ACACA/ACSF3/AK2/AK5/NPPC/ACAT1/SCD/DCTD/PARP10/DHODH/PARP9/SLC25A1/PANK4/IMPDH1/ATP5PD                                                                                                                                           |
| Biological Process | GO:0001779 | natural killer cell<br>differentiation               | 6/2279  | 22/18866  | 0.0417479 | 0.3197425 | 0.2893144 | 6  | PIK3CD/SP3/PGLYRP1/PTPRC/TYRO3/KAT7                                                                                                                                                                                                                                                                                                                                                                 |
| Biological Process | GO:0006312 | mitotic recombination                                | 6/2279  | 22/18866  | 0.0417479 | 0.3197425 | 0.2893144 | 6  | BRCA2/RAD52/NSMCE2/DMC1/ERCC1/ERCC2                                                                                                                                                                                                                                                                                                                                                                 |
| Biological Process | GO:0006379 | mRNA cleavage                                        | 6/2279  | 22/18866  | 0.0417479 | 0.3197425 | 0.2893144 | 6  | FIP1L1/ERN1/CPSF3/AGO2/CPSF4/TUT1                                                                                                                                                                                                                                                                                                                                                                   |
| Biological Process | GO:0006622 | protein targeting to<br>lysosome                     | 6/2279  | 22/18866  | 0.0417479 | 0.3197425 | 0.2893144 | 6  | SORL1/CLU/NUMA1/SORT1/NEDD4/NCOA4                                                                                                                                                                                                                                                                                                                                                                   |

|                    |            |                                                           |         |           |           |           |           |    |                                                                                                                                                                                                                                                                                                          |
|--------------------|------------|-----------------------------------------------------------|---------|-----------|-----------|-----------|-----------|----|----------------------------------------------------------------------------------------------------------------------------------------------------------------------------------------------------------------------------------------------------------------------------------------------------------|
| Biological Process | GO:0023058 | adaptation of signaling pathway                           | 6/2279  | 22/18866  | 0.0417479 | 0.3197425 | 0.2893144 | 6  | ARRB1/DNM2/GIPR/ARRB2/DNM1/GRK2                                                                                                                                                                                                                                                                          |
| Biological Process | GO:0034104 | negative regulation of tissue remodeling                  | 6/2279  | 22/18866  | 0.0417479 | 0.3197425 | 0.2893144 | 6  | ABR/INPP5D/UBASH3B/TNFAIP3/CSK/BCR                                                                                                                                                                                                                                                                       |
| Biological Process | GO:0060352 | cell adhesion molecule production                         | 6/2279  | 22/18866  | 0.0417479 | 0.3197425 | 0.2893144 | 6  | FUT7/MIR101-2/COLEC12/NOTCH1/NOTCH4/FLOT1                                                                                                                                                                                                                                                                |
| Biological Process | GO:0071379 | cellular response to prostaglandin stimulus               | 6/2279  | 22/18866  | 0.0417479 | 0.3197425 | 0.2893144 | 6  | PPARG/P2RY6/GNG2/ACACA/PRKCE/PRKAA1                                                                                                                                                                                                                                                                      |
| Biological Process | GO:0033135 | regulation of peptidyl-serine phosphorylation             | 25/2279 | 145/18866 | 0.0418913 | 0.3197425 | 0.2893144 | 25 | PDE4D/RPTOR/ANGPT1/ARRB1/TNF/NCK2/SMYD3/APP/SMAD7/TGFB1/AXIN1/CSF3/SH2D3C/ARRB2/FNIP2/PLCL1/BCL2/GGNBP2/BCAR3/INPP5F/SPTBN4/NTF4/LIF/EIF4G1/PRKAA1                                                                                                                                                       |
| Biological Process | GO:0034599 | cellular response to oxidative stress                     | 48/2279 | 310/18866 | 0.0421121 | 0.3197425 | 0.2893144 | 48 | TRPM2/P4HB/MPO/VRK2/IL10/LCN2/PRR5L/MYB/RAD52/NCF4/ZNF622/DNM2/TNF/TRAF2/TNFAIP3/FBXO7/CAMKK2/MGAT3/MSRA/RIPK1/NCF2/PXN/PAX2/ZNF580/FER/AQP1/RIPK3/AIFM2/STK24/PDGFD/NOL3/CAT/ETS1/NFE2L2/ARNTL/ANKRD2/IL18RAP/BCL2/EPAS1/GLRX2/PDGFRB/FOXO1/RELA/BAG5/TXNRD2/SIRT3/PRKAA1/PRKN                          |
| Biological Process | GO:0090287 | regulation of cellular response to growth factor stimulus | 48/2279 | 310/18866 | 0.0421121 | 0.3197425 | 0.2893144 | 48 | LRG1/LTBP1/SPRED2/SORL1/MIR140/SKI/SMAD3/LDLRAD4/DNM2/MIR199A1/CYFIP2/HIPK2/CHST11/TGFBR2/THBS1/GRB10/DLL1/RBPJ/UBE2O/ILK/PCSK6/SMAD7/FGFR1/TGFB1/EPN2/PRKCB/SMURF1/TGFB11/BMPER/ITGB3/RUNX2/HTRA4/NUMA1/CREBBP/ENG/PRDM16/MIR199A2/NOTCH1/NEDD4/HTRA3/MYO1C/HHEX/FAM20C/CYFIP1/ZNF423/OTX2/SPART/ADGRA2 |
| Biological Process | GO:0003300 | cardiac muscle hypertrophy                                | 19/2279 | 104/18866 | 0.0422749 | 0.3197425 | 0.2893144 | 19 | HDAC4/CTDP1/TTN/MIR145/AKAP13/TNFRSF1B/SMAD3/PRKCA/MIR199A1/MIR24-2/MIR23A/TNFRSF1A/CAMTA2/PDE9A/MIR199A2/NOTCH1/MEF2C/FOXO1/INPP5F                                                                                                                                                                      |
| Biological Process | GO:0032231 | regulation of actin filament bundle assembly              | 19/2279 | 104/18866 | 0.0422749 | 0.3197425 | 0.2893144 | 19 | ARHGEF10/TACSTD2/ITGB1BP1/PIK3R1/SMAD3/SH3PXD2B/ARAP1/SYNPO2L/PXN/WNT11/PPFIA1/PFN1/ACTG1/MIR138-2/ARHGEF10L/ARHGEF18/ARHGEF15/SYNPO/PRKN                                                                                                                                                                |



|                    |            |                                                                                       |        |         |           |           |           |   |                   |
|--------------------|------------|---------------------------------------------------------------------------------------|--------|---------|-----------|-----------|-----------|---|-------------------|
| Biological Process | GO:0000414 | regulation of histone H3-K36 methylation                                              | 3/2279 | 7/18866 | 0.0423362 | 0.3197425 | 0.2893144 | 3 | BRD4/PAXIP1/NSD3  |
| Biological Process | GO:0006657 | CDP-choline pathway                                                                   | 3/2279 | 7/18866 | 0.0423362 | 0.3197425 | 0.2893144 | 3 | PCYT1A/CHPT1/CHKB |
| Biological Process | GO:0009188 | ribonucleoside diphosphate biosynthetic process                                       | 3/2279 | 7/18866 | 0.0423362 | 0.3197425 | 0.2893144 | 3 | GUK1/AK2/AK5      |
| Biological Process | GO:0015793 | glycerol transport                                                                    | 3/2279 | 7/18866 | 0.0423362 | 0.3197425 | 0.2893144 | 3 | AQP1/AQP3/AQP9    |
| Biological Process | GO:0021648 | vestibulocochlear nerve morphogenesis                                                 | 3/2279 | 7/18866 | 0.0423362 | 0.3197425 | 0.2893144 | 3 | NRP2/ATP8B1/PAX2  |
| Biological Process | GO:0031580 | membrane raft distribution                                                            | 3/2279 | 7/18866 | 0.0423362 | 0.3197425 | 0.2893144 | 3 | GSN/PTPRC/DOCK2   |
| Biological Process | GO:0031585 | regulation of inositol 1,4,5-trisphosphate-sensitive calcium-release channel activity | 3/2279 | 7/18866 | 0.0423362 | 0.3197425 | 0.2893144 | 3 | P2RY6/MYO5A/HTT   |
| Biological Process | GO:0034141 | positive regulation of toll-like receptor 3 signaling pathway                         | 3/2279 | 7/18866 | 0.0423362 | 0.3197425 | 0.2893144 | 3 | WDFY1/FLOT1/PELI1 |
| Biological Process | GO:0036466 | synaptic vesicle recycling via endosome                                               | 3/2279 | 7/18866 | 0.0423362 | 0.3197425 | 0.2893144 | 3 | ITSN1/DNM1L/AP3D1 |

|                    |            |                                                                           |        |         |           |           |           |   |                        |
|--------------------|------------|---------------------------------------------------------------------------|--------|---------|-----------|-----------|-----------|---|------------------------|
| Biological Process | GO:0042297 | vocal learning                                                            | 3/2279 | 7/18866 | 0.0423362 | 0.3197425 | 0.2893144 | 3 | NRXN1/HTT/NRXN2        |
| Biological Process | GO:0042940 | D-amino acid transport                                                    | 3/2279 | 7/18866 | 0.0423362 | 0.3197425 | 0.2893144 | 3 | SLC1A2/SFXN1/SLC1A3    |
| Biological Process | GO:0044854 | plasma membrane raft assembly                                             | 3/2279 | 7/18866 | 0.0423362 | 0.3197425 | 0.2893144 | 3 | PACSIN2/MIR138-2/FLOT1 |
| Biological Process | GO:0045630 | positive regulation of T-helper 2 cell differentiation                    | 3/2279 | 7/18866 | 0.0423362 | 0.3197425 | 0.2893144 | 3 | PRKCZ/NLRP3/RARA       |
| Biological Process | GO:0048290 | isotype switching to IgA isotypes                                         | 3/2279 | 7/18866 | 0.0423362 | 0.3197425 | 0.2893144 | 3 | TGFB1/TNFSF13/NSD2     |
| Biological Process | GO:0051597 | response to methylmercury                                                 | 3/2279 | 7/18866 | 0.0423362 | 0.3197425 | 0.2893144 | 3 | FECH/ARSB/ANK2         |
| Biological Process | GO:0052651 | monoacylglycerol catabolic process                                        | 3/2279 | 7/18866 | 0.0423362 | 0.3197425 | 0.2893144 | 3 | MGLL/ABHD16A/ABHD16B   |
| Biological Process | GO:0060369 | positive regulation of Fc receptor mediated stimulatory signaling pathway | 3/2279 | 7/18866 | 0.0423362 | 0.3197425 | 0.2893144 | 3 | CD226/PTPRJ/PTPRC      |
| Biological Process | GO:0060462 | lung lobe development                                                     | 3/2279 | 7/18866 | 0.0423362 | 0.3197425 | 0.2893144 | 3 | TGFBR2/GRHL2/LIF       |

|                    |            |                                                             |        |         |           |           |           |   |                        |
|--------------------|------------|-------------------------------------------------------------|--------|---------|-----------|-----------|-----------|---|------------------------|
| Biological Process | GO:0060463 | lung lobe morphogenesis                                     | 3/2279 | 7/18866 | 0.0423362 | 0.3197425 | 0.2893144 | 3 | TGFBR2/GRHL2/LIF       |
| Biological Process | GO:0060558 | regulation of calcidiol 1-monooxygenase activity            | 3/2279 | 7/18866 | 0.0423362 | 0.3197425 | 0.2893144 | 3 | GFI1/VDR/TNF           |
| Biological Process | GO:0060717 | chorion development                                         | 3/2279 | 7/18866 | 0.0423362 | 0.3197425 | 0.2893144 | 3 | E2F7/DNAJB6/PAXIP1     |
| Biological Process | GO:0061762 | CAMKK-AMPK signaling cascade                                | 3/2279 | 7/18866 | 0.0423362 | 0.3197425 | 0.2893144 | 3 | CAMKK2/HTT/PRKAA1      |
| Biological Process | GO:0070100 | negative regulation of chemokine-mediated signaling pathway | 3/2279 | 7/18866 | 0.0423362 | 0.3197425 | 0.2893144 | 3 | CCL5/PADI2/SLIT3       |
| Biological Process | GO:0070837 | dehydroascorbic acid transport                              | 3/2279 | 7/18866 | 0.0423362 | 0.3197425 | 0.2893144 | 3 | SLC2A14/SLC2A1/SLC23A1 |
| Biological Process | GO:0070944 | neutrophil-mediated killing of bacterium                    | 3/2279 | 7/18866 | 0.0423362 | 0.3197425 | 0.2893144 | 3 | AZU1/ELANE/CTSG        |
| Biological Process | GO:0072007 | mesangial cell differentiation                              | 3/2279 | 7/18866 | 0.0423362 | 0.3197425 | 0.2893144 | 3 | PDGFB/NOTCH1/GPR4      |
| Biological Process | GO:0072257 | metanephric nephron tubule epithelial cell differentiation  | 3/2279 | 7/18866 | 0.0423362 | 0.3197425 | 0.2893144 | 3 | PAX2/WWTR1/LIF         |

|                    |            |                                                                          |         |          |           |           |           |    |                                                               |
|--------------------|------------|--------------------------------------------------------------------------|---------|----------|-----------|-----------|-----------|----|---------------------------------------------------------------|
| Biological Process | GO:0072307 | regulation of metanephric nephron tubule epithelial cell differentiation | 3/2279  | 7/18866  | 0.0423362 | 0.3197425 | 0.2893144 | 3  | PAX2/WWTR1/LIF                                                |
| Biological Process | GO:0090240 | positive regulation of histone H4 acetylation                            | 3/2279  | 7/18866  | 0.0423362 | 0.3197425 | 0.2893144 | 3  | ARRB1/PIH1D1/KAT7                                             |
| Biological Process | GO:0098596 | imitative learning                                                       | 3/2279  | 7/18866  | 0.0423362 | 0.3197425 | 0.2893144 | 3  | NRXN1/HTT/NRXN2                                               |
| Biological Process | GO:1900244 | positive regulation of synaptic vesicle endocytosis                      | 3/2279  | 7/18866  | 0.0423362 | 0.3197425 | 0.2893144 | 3  | SH3GL1/DNM1/DNM1L                                             |
| Biological Process | GO:1904429 | regulation of t-circle formation                                         | 3/2279  | 7/18866  | 0.0423362 | 0.3197425 | 0.2893144 | 3  | RTEL1/ERCC1/SLX4                                              |
| Biological Process | GO:2000394 | positive regulation of lamellipodium morphogenesis                       | 3/2279  | 7/18866  | 0.0423362 | 0.3197425 | 0.2893144 | 3  | RREB1/ARHGEF7/CORO1C                                          |
| Biological Process | GO:2000638 | regulation of SREBP signaling pathway                                    | 3/2279  | 7/18866  | 0.0423362 | 0.3197425 | 0.2893144 | 3  | AMFR/ZBTB7B/SPRING1                                           |
| Biological Process | GO:0002704 | negative regulation of leukocyte mediated immunity                       | 11/2279 | 52/18866 | 0.0436541 | 0.328131  | 0.2969046 | 11 | ABR/CCR2/CD84/DUSP22/HLA-F/PTPN6/SMAD7/PTPRC/BCR/ARRB2/CD96   |
| Biological Process | GO:0010883 | regulation of lipid storage                                              | 11/2279 | 52/18866 | 0.0436541 | 0.328131  | 0.2969046 | 11 | PNPLA2/EHD1/PPARG/TNF/ABCG1/NR1H2/ITGB3/ABCA1/ACACB/FTO/ABHD5 |

|                    |            |                                                  |         |           |           |           |           |    |                                                                                                                                                   |
|--------------------|------------|--------------------------------------------------|---------|-----------|-----------|-----------|-----------|----|---------------------------------------------------------------------------------------------------------------------------------------------------|
| Biological Process | GO:0033059 | cellular pigmentation                            | 11/2279 | 52/18866  | 0.0436541 | 0.328131  | 0.2969046 | 11 | SHROOM3/LYST/KIF13A/ZEB2/RAB27A/CDH3/DCTN2/MYO5A/BCL2/AP3D1/DTNBP1                                                                                |
| Biological Process | GO:0071622 | regulation of granulocyte chemotaxis             | 11/2279 | 52/18866  | 0.0436541 | 0.328131  | 0.2969046 | 11 | C3AR1/CCL5/CSF1R/THBS1/C5AR2/JAM3/CAMK1D/CXCL17/DAPK2/DNM1L/DYSF                                                                                  |
| Biological Process | GO:0072666 | establishment of protein localization to vacuole | 11/2279 | 52/18866  | 0.0436541 | 0.328131  | 0.2969046 | 11 | SORL1/VTI1A/VPS13D/TNFAIP3/CLU/SMURF1/NUMA1/SORT1/NEDD4/AP3D1/NCOA4                                                                               |
| Biological Process | GO:1990089 | response to nerve growth factor                  | 11/2279 | 52/18866  | 0.0436541 | 0.328131  | 0.2969046 | 11 | EHD1/CREB1/ACAP2/APP/RAPGEF2/SORT1/NTRK1/MICALL1/KIF1B/UBE3A/NTF4                                                                                 |
| Biological Process | GO:0051492 | regulation of stress fiber assembly              | 17/2279 | 91/18866  | 0.0438718 | 0.3295067 | 0.2981494 | 17 | ARHGEF10/TACSTD2/ITGB1BP1/PIK3R1/SMAD3/SH3PXD2B/ARAP1/SYNPO2L/PXN/WNT11/PPF1A/PFN1/ACTG1/MIR138-2/ARHGEF10L/ARHGEF18/ARHGEF15                     |
| Biological Process | GO:0003014 | renal system process                             | 22/2279 | 125/18866 | 0.0442279 | 0.3319192 | 0.3003323 | 22 | GSN/ADCY2/PRKAR1B/ADCY9/SGK1/GJA5/COMT/RRM2B/GNAI2/PRKRIP1/HNF1A/HBB/AQP1/PDGFB/BCR/KCNQ1/ADCY4/BCL2/AQP3/F2R/AGTR1/HSD11B2                       |
| Biological Process | GO:0006282 | regulation of DNA repair                         | 23/2279 | 132/18866 | 0.0445853 | 0.3336653 | 0.3019122 | 23 | FAM168A/SPIDR/RMI2/RAD52/SETD2/RTEL1/WRNIP1/RECQL5/OTUB2/UBE2V1/OTUB1/TP53BP1/FOXM1/TRIP12/KAT7/PARP9/TFIP11/NSD2/CYREN/ABRAXAS1/SLF1/FBH1/BABAM2 |
| Biological Process | GO:0044331 | cell-cell adhesion mediated by cadherin          | 7/2279  | 28/18866  | 0.0447416 | 0.3336653 | 0.3019122 | 7  | FER/PLEKHA7/CDHR2/NOTCH1/NOTCH4/PTPRU/FLOT1                                                                                                       |
| Biological Process | GO:0061437 | renal system vasculature development             | 7/2279  | 28/18866  | 0.0447416 | 0.3336653 | 0.3019122 | 7  | ANGPT1/PDGFD/IL6R/PDGFB/NOTCH1/GPR4/PDGFRB                                                                                                        |

|                    |            |                                                                       |         |           |           |           |           |    |                                                                                                                                                               |
|--------------------|------------|-----------------------------------------------------------------------|---------|-----------|-----------|-----------|-----------|----|---------------------------------------------------------------------------------------------------------------------------------------------------------------|
| Biological Process | GO:0061440 | kidney vasculature development                                        | 7/2279  | 28/18866  | 0.0447416 | 0.3336653 | 0.3019122 | 7  | ANGPT1/PDGFD/IL6R/PDGFB/NOTCH1/GPR4/PDGFRB                                                                                                                    |
| Biological Process | GO:0095500 | acetylcholine receptor signaling pathway                              | 7/2279  | 28/18866  | 0.0447416 | 0.3336653 | 0.3019122 | 7  | LY6G6D/GNAI2/GNA11/CHRM2/PLCB1/RGS10/GRK2                                                                                                                     |
| Biological Process | GO:1902932 | positive regulation of alcohol biosynthetic process                   | 7/2279  | 28/18866  | 0.0447416 | 0.3336653 | 0.3019122 | 7  | TNF/ABCG1/P2RY6/HRH1/POR/SREBF1/PRKAA1                                                                                                                        |
| Biological Process | GO:1905063 | regulation of vascular associated smooth muscle cell differentiation  | 7/2279  | 28/18866  | 0.0447416 | 0.3336653 | 0.3019122 | 7  | MIR140/MIR145/NFATC2/NFATC1/PDGFB/ENG/DNMT1                                                                                                                   |
| Biological Process | GO:1990776 | response to angiotensin                                               | 7/2279  | 28/18866  | 0.0447416 | 0.3336653 | 0.3019122 | 7  | MIR143/MIR145/ARID1B/AGTRAP/NFE2L2/AGTR1/RELA                                                                                                                 |
| Biological Process | GO:0035304 | regulation of protein dephosphorylation                               | 24/2279 | 139/18866 | 0.0448256 | 0.3340302 | 0.3022424 | 24 | LMTK2/MGAT5/PPP1R1B/URI1/CABIN1/TNF/GNAI2/CAMTA1/ELFN2/RCAN1/PHACTR2/TGFB1/PPP2R5C/HTT/PTPRC/PPP2R1A/PPP2R5E/PPP2R5D/PPP2R1B/PDGFRB/PPP1R16B/CD33/ANKLE2/PTPA |
| Biological Process | GO:0060395 | SMAD protein signal transduction                                      | 15/2279 | 78/18866  | 0.0449326 | 0.3345649 | 0.3027262 | 15 | LNPEP/SKI/SMAD3/HIPK2/SMAD7/ZMIZ1/TGFB1/NUP93/WWTR1/RBPMS/SUB1/SLC33A1/GDF6/INHBA/NODAL                                                                       |
| Biological Process | GO:0010771 | negative regulation of cell morphogenesis involved in differentiation | 18/2279 | 98/18866  | 0.0450499 | 0.3351752 | 0.3032784 | 18 | SEMA6B/TACSTD2/KANK1/YWHAH/ITGB1BP1/SEMA4A/RTN4/SEMA4B/ACTN4/IFRD1/SYNGAP1/SEMA4D/RAPGEF2/DNM3/CORO1C/CDKL3/UBE3A/SPART                                       |
| Biological Process | GO:0006895 | Golgi to endosome transport                                           | 5/2279  | 17/18866  | 0.0456251 | 0.337079  | 0.3050011 | 5  | AP2A1/CORO7/SORT1/EPS15/DOP1B                                                                                                                                 |

|                    |            |                                                  |        |          |           |           |           |   |                                                          |
|--------------------|------------|--------------------------------------------------|--------|----------|-----------|-----------|-----------|---|----------------------------------------------------------|
| Biological Process | GO:0006991 | response to sterol depletion                     | 5/2279 | 17/18866 | 0.0456251 | 0.337079  | 0.3050011 | 5 | AMFR/ZBTB7B/ARHGEF10L/SREBF1/SPRING1                     |
| Biological Process | GO:0007158 | neuron cell-cell adhesion                        | 5/2279 | 17/18866 | 0.0456251 | 0.337079  | 0.3050011 | 5 | NINJ2/NCAM2/NRXN1/NRXN2/ASTN2                            |
| Biological Process | GO:0030889 | negative regulation of B cell proliferation      | 5/2279 | 17/18866 | 0.0456251 | 0.337079  | 0.3050011 | 5 | IL10/INPP5D/MNDA/TNFRSF21/BLK                            |
| Biological Process | GO:0031000 | response to caffeine                             | 5/2279 | 17/18866 | 0.0456251 | 0.337079  | 0.3050011 | 5 | PPARG/CASQ2/SLC8A1/DHODH/PRKAA1                          |
| Biological Process | GO:0032695 | negative regulation of interleukin-12 production | 5/2279 | 17/18866 | 0.0456251 | 0.337079  | 0.3050011 | 5 | IL10/MEFV/THBS1/TIGIT/ARRB2                              |
| Biological Process | GO:0036166 | phenotypic switching                             | 5/2279 | 17/18866 | 0.0456251 | 0.337079  | 0.3050011 | 5 | MIR140/MIR143/MIR145/PDGFB/DNMT1                         |
| Biological Process | GO:1904380 | endoplasmic reticulum mannose trimming           | 5/2279 | 17/18866 | 0.0456251 | 0.337079  | 0.3050011 | 5 | AMFR/EDEM1/DERL2/EDEM2/MARCH6                            |
| Biological Process | GO:2000811 | negative regulation of anoikis                   | 5/2279 | 17/18866 | 0.0456251 | 0.337079  | 0.3050011 | 5 | CEACAM6/TLE1/BCL2/NOTCH1/CEACAM5                         |
| Biological Process | GO:0034142 | toll-like receptor 4 signaling pathway           | 9/2279 | 40/18866 | 0.0457588 | 0.3370895 | 0.3050105 | 9 | MIR140/PIK3AP1/TNFAIP3/SCIMP/ITGB2/PRKCE/WDFY1/LTF/PELI1 |

|                    |            |                                                                     |         |           |           |           |           |    |                                                                                                                                                                                                                                                                                                                                                                               |
|--------------------|------------|---------------------------------------------------------------------|---------|-----------|-----------|-----------|-----------|----|-------------------------------------------------------------------------------------------------------------------------------------------------------------------------------------------------------------------------------------------------------------------------------------------------------------------------------------------------------------------------------|
| Biological Process | GO:1902895 | positive regulation of pri-miRNA transcription by RNA polymerase II | 9/2279  | 40/18866  | 0.0457588 | 0.3370895 | 0.3050105 | 9  | IL10/PPARG/SMAD3/TNF/TGFB1/PDGFB/ETS1/SREBF1/RELA                                                                                                                                                                                                                                                                                                                             |
| Biological Process | GO:0006109 | regulation of carbohydrate metabolic process                        | 34/2279 | 210/18866 | 0.0458116 | 0.3370895 | 0.3050105 | 34 | MAEA/FOXK1/HDAC4/PRKAG2/AP2A1/C1QTNF3/PFKFB4/RAE1/GPLD1/CBFA2T3/PGP/APP/PGAM1/P2RY6/TGFB1/HRH1/DGKQ/NUP93/DYRK2/SEC13/GNB3/ACACB/PDGFB/PPP1CB/ESRRB/PRKCE/FOXO1/NCOA2/SOGA1/PFKFB3/PRKAA1/PRKN/SDHAF3/RUBCNL                                                                                                                                                                  |
| Biological Process | GO:0009649 | entrainment of circadian clock                                      | 8/2279  | 34/18866  | 0.0458393 | 0.3370895 | 0.3050105 | 8  | PHLPP1/MTA1/GNA11/PPP1CB/PER2/PER1/FBXL6/USP2                                                                                                                                                                                                                                                                                                                                 |
| Biological Process | GO:0010922 | positive regulation of phosphatase activity                         | 8/2279  | 34/18866  | 0.0458393 | 0.3370895 | 0.3050105 | 8  | SMAD3/GPLD1/RIPK3/PTPRC/MEF2C/PDGFRB/CD33/PTPA                                                                                                                                                                                                                                                                                                                                |
| Biological Process | GO:0050715 | positive regulation of cytokine secretion                           | 8/2279  | 34/18866  | 0.0458393 | 0.3370895 | 0.3050105 | 8  | SORL1/IL10/C1QTNF3/CLEC9A/FGR/TNF/CLEC5A/CADM1                                                                                                                                                                                                                                                                                                                                |
| Biological Process | GO:0010639 | negative regulation of organelle organization                       | 62/2279 | 416/18866 | 0.0465214 | 0.3418405 | 0.3093094 | 62 | VILL/TBCD/VAT1/TACSTD2/SSH1/GSN/MAD1L1/KANK1/TNKS/SKI/PAM16/RTEL1/DNM2/CAPG/ARAP1/NAV3/OTUB2/SSH3/FEZ2/CLU/PPFIA1/SPHK2/TMOD3/SVIL/CTBP1/PFN1/CLEC16A/ESPN/GMFB/KDM4C/MCM2/SMG6/NOL3/SPTA1/ARRB2/FNIP2/MIR138-2/ADD1/OTUB1/ARHGEF18/DNMT1/PIH1D1/DNM1L/AVIL/FLII/ARHGEF2/TRIP12/TSC2/ERCC1/BCL2L1/SPTAN1/TMOD1/SLX4/AURKAIP1/GMFG/MYADM/SPTBN4/SPEF1/LIF/PCID2/P<br>RKN/CYRIB |
| Biological Process | GO:2000779 | regulation of double-strand break repair                            | 16/2279 | 85/18866  | 0.0466254 | 0.3420884 | 0.3095337 | 16 | SPIDR/RMI2/SETD2/RTEL1/RECQL5/OTUB2/OTUB1/TP53BP1/FOXM1/TRIP12/PARP9/TFIP11/NSD2/CYREN/SLF1/FBH1                                                                                                                                                                                                                                                                              |
| Biological Process | GO:0001768 | establishment of T cell polarity                                    | 4/2279  | 12/18866  | 0.0473472 | 0.3420884 | 0.3095337 | 4  | GSN/MYH9/DOCK8/DOCK2                                                                                                                                                                                                                                                                                                                                                          |
| Biological Process | GO:0002468 | dendritic cell antigen processing and presentation                  | 4/2279  | 12/18866  | 0.0473472 | 0.3420884 | 0.3095337 | 4  | SLC11A1/THBS1/NOD2/CD68                                                                                                                                                                                                                                                                                                                                                       |



|                    |            |                                                     |        |          |           |           |           |   |                               |
|--------------------|------------|-----------------------------------------------------|--------|----------|-----------|-----------|-----------|---|-------------------------------|
| Biological Process | GO:0007077 | mitotic nuclear envelope disassembly                | 4/2279 | 12/18866 | 0.0473472 | 0.3420884 | 0.3095337 | 4 | PRKCA/PRKCB/NEK6/LPIN1        |
| Biological Process | GO:0009162 | deoxyribonucleoside monophosphate metabolic process | 4/2279 | 12/18866 | 0.0473472 | 0.3420884 | 0.3095337 | 4 | TK2/GUK1/DCTD/TK1             |
| Biological Process | GO:0015803 | branched-chain amino acid transport                 | 4/2279 | 12/18866 | 0.0473472 | 0.3420884 | 0.3095337 | 4 | SLC43A2/SLC7A5/SLC43A1/SLC7A8 |
| Biological Process | GO:0032621 | interleukin-18 production                           | 4/2279 | 12/18866 | 0.0473472 | 0.3420884 | 0.3095337 | 4 | IL10/NLRP3/CD84/TLR9          |
| Biological Process | GO:0033182 | regulation of histone ubiquitination                | 4/2279 | 12/18866 | 0.0473472 | 0.3420884 | 0.3095337 | 4 | OTUB2/OTUB1/TRIP12/RNF40      |
| Biological Process | GO:0034086 | maintenance of sister chromatid cohesion            | 4/2279 | 12/18866 | 0.0473472 | 0.3420884 | 0.3095337 | 4 | TNKS/NSMCE2/RB1/SLF1          |
| Biological Process | GO:0034088 | maintenance of mitotic sister chromatid cohesion    | 4/2279 | 12/18866 | 0.0473472 | 0.3420884 | 0.3095337 | 4 | TNKS/NSMCE2/RB1/SLF1          |
| Biological Process | GO:0038180 | nerve growth factor signaling pathway               | 4/2279 | 12/18866 | 0.0473472 | 0.3420884 | 0.3095337 | 4 | RAPGEF2/SORT1/NTRK1/NTF4      |
| Biological Process | GO:0046689 | response to mercury ion                             | 4/2279 | 12/18866 | 0.0473472 | 0.3420884 | 0.3095337 | 4 | BSG/ABCC2/AQP1/AQP9           |

|                    |            |                                                                                 |        |          |           |           |           |   |                           |
|--------------------|------------|---------------------------------------------------------------------------------|--------|----------|-----------|-----------|-----------|---|---------------------------|
| Biological Process | GO:0070586 | cell-cell adhesion involved in gastrulation                                     | 4/2279 | 12/18866 | 0.0473472 | 0.3420884 | 0.3095337 | 4 | IL10/MBP/IL1RN/MYADM      |
| Biological Process | GO:0090154 | positive regulation of sphingolipid biosynthetic process                        | 4/2279 | 12/18866 | 0.0473472 | 0.3420884 | 0.3095337 | 4 | TNF/TNFRSF1A/SPHK2/SIRT3  |
| Biological Process | GO:0090520 | sphingolipid mediated signaling pathway                                         | 4/2279 | 12/18866 | 0.0473472 | 0.3420884 | 0.3095337 | 4 | SPHK2/S1PR2/S1PR4/EZR     |
| Biological Process | GO:0097284 | hepatocyte apoptotic process                                                    | 4/2279 | 12/18866 | 0.0473472 | 0.3420884 | 0.3095337 | 4 | GSN/STK3/RB1/BCL2L1       |
| Biological Process | GO:0098885 | modification of postsynaptic actin cytoskeleton                                 | 4/2279 | 12/18866 | 0.0473472 | 0.3420884 | 0.3095337 | 4 | ITSN1/BAIAP2/PFN1/CYFIP1  |
| Biological Process | GO:1902224 | ketone body metabolic process                                                   | 4/2279 | 12/18866 | 0.0473472 | 0.3420884 | 0.3095337 | 4 | BDH1/HMGCL/ACAT1/ACSS3    |
| Biological Process | GO:1905461 | positive regulation of vascular associated smooth muscle cell apoptotic process | 4/2279 | 12/18866 | 0.0473472 | 0.3420884 | 0.3095337 | 4 | PPARG/MIR140/E2F3/MIR24-2 |
| Biological Process | GO:1905668 | positive regulation of protein localization to endosome                         | 4/2279 | 12/18866 | 0.0473472 | 0.3420884 | 0.3095337 | 4 | SORL1/MGAT3/ZDHHC1/EZR    |
| Biological Process | GO:2000304 | positive regulation of ceramide biosynthetic process                            | 4/2279 | 12/18866 | 0.0473472 | 0.3420884 | 0.3095337 | 4 | TNF/TNFRSF1A/SPHK2/SIRT3  |

|                    |            |                                                                                     |         |           |           |           |           |    |                                                                                                                                                                                                                                                                |
|--------------------|------------|-------------------------------------------------------------------------------------|---------|-----------|-----------|-----------|-----------|----|----------------------------------------------------------------------------------------------------------------------------------------------------------------------------------------------------------------------------------------------------------------|
| Biological Process | GO:2001135 | regulation of endocytic recycling                                                   | 4/2279  | 12/18866  | 0.0473472 | 0.3420884 | 0.3095337 | 4  | EHD1/SORL1/ARHGAP1/INPP5F                                                                                                                                                                                                                                      |
| Biological Process | GO:0043647 | inositol phosphate metabolic process                                                | 14/2279 | 72/18866  | 0.047523  | 0.3428371 | 0.3102112 | 14 | SYNJ2/INPP5A/INPP5D/ITPKB/INPP4A/NUDT3/P2RY6/HRH1/INPP5E/PLCB1/IMPA2/PLCG1/PLCD3/IP6K1                                                                                                                                                                         |
| Biological Process | GO:0050663 | cytokine secretion                                                                  | 14/2279 | 72/18866  | 0.047523  | 0.3428371 | 0.3102112 | 14 | SORL1/IL10/C1QTNF3/CLEC9A/NLRP3/FGR/TNF/TLR9/CLEC5A/SPHK2/NOD2/DYSF/CADM1/CCN4                                                                                                                                                                                 |
| Biological Process | GO:0022898 | regulation of transmembrane transporter activity                                    | 43/2279 | 276/18866 | 0.0478034 | 0.344598  | 0.3118045 | 43 | PDE4D/KCNE1/THADA/CASQ2/WWP2/FXYD2/YWHAH/FXYD1/CCR2/DNM2/TLR9/TESC/JSRP1/AHNAK/RIPK1/APP/NOS1AP/ACTN4/P2RY6/SPHK2/CRHBP/CNIH2/HTR3A/MYO5A/HTT/CAB39/MAPK8IP2/GSG1L/BCL2/GSTO1/MEF2C/SHANK2/PRKCE/NEDD4/DYSF/ANK2/HECW2/PDZK1/CASQ1/FGF14/CBARP/STIMATE/CRACR2A |
| Biological Process | GO:0006997 | nucleus organization                                                                | 23/2279 | 133/18866 | 0.0479806 | 0.3454536 | 0.3125787 | 23 | DCTN1/SYNE1/SRPK2/PRKCA/HIPK2/RTN4/BIN1/USP36/PRKCB/SF1/NUP93/NUMA1/PPP2R1A/ETS1/NEK6/UBXN2A/TOR1B/NDEL1/ANKLE2/LPIN1/BANF1/IRAG2/MFSD14A                                                                                                                      |
| Biological Process | GO:1903321 | negative regulation of protein modification by small protein conjugation or removal | 17/2279 | 92/18866  | 0.0479948 | 0.3454536 | 0.3125787 | 17 | ARRB1/TNFAIP3/MIR101-2/OTUB2/SMAD7/ARRB2/MIR138-2/PER2/OTUB1/NXN/PRKCE/TRIP12/DYSF/RELA/BAG5/PARP10/MARCHF7                                                                                                                                                    |
| Biological Process | GO:0010977 | negative regulation of neuron projection development                                | 26/2279 | 154/18866 | 0.0481659 | 0.3464222 | 0.3134551 | 26 | SEMA6B/CTS2/GFI1/KANK1/YWHAH/BCL11A/SEMA4A/RTN4/PMP22/SEMA4B/IFRD1/ASAP1/SYNGAP1/KREMEN1/SEMA4D/RAPGEF2/ITM2C/DNM3/CDKL3/UBE3A/CERS2/INPP5F/BAG5/RAP1GAP2/PRAG1/SPART                                                                                          |
| Biological Process | GO:0043393 | regulation of protein binding                                                       | 34/2279 | 211/18866 | 0.0485058 | 0.3486037 | 0.315429  | 34 | HDAC4/SLPI/CTS2/ZFPM1/MARK3/SORL1/IL10/ANGPT1/ITGB1BP1/AMFR/ARRB1/UBASH3B/HIPK2/CCM2/DISC1/APP/TCF7L2/RAPGEF2/CSF3/STK3/ATP2A3/CSNK1E/PDGFB/SPTA1/ARRB2/PLCL1/ADD1/CYLD/MARK2/FLOT1/DTNBP1/TFIP11/STING1/PRKN                                                  |
| Biological Process | GO:0006302 | double-strand break repair                                                          | 41/2279 | 262/18866 | 0.049271  | 0.3524981 | 0.3189528 | 41 | BLM/SPIDR/BRCA2/RMI2/RAD52/SETD2/TDP1/RTEL1/HUS1/NSMCE2/KDM2A/MCM5/RECQL5/EME1/MEIOB/OTUB2/UVRAG/MTA1/AP5S1/MCM2/SMARCAL1/OTUB1/RAD21L1/DMC1/TP53BP1/CDCA5/FOXM1/CHEK2/TRIP12/ERCC1/SLX4/PARP9/PAXIP1/TFIP11/PAXX/NSD2/CYREN/ABRAXAS1/SLF1/FBH1/BABAM2         |

|                    |            |                                                                     |         |           |           |           |           |    |                                                                                                                                                                                                                                                                                                                              |
|--------------------|------------|---------------------------------------------------------------------|---------|-----------|-----------|-----------|-----------|----|------------------------------------------------------------------------------------------------------------------------------------------------------------------------------------------------------------------------------------------------------------------------------------------------------------------------------|
| Biological Process | GO:0007632 | visual behavior                                                     | 11/2279 | 53/18866  | 0.0493074 | 0.3524981 | 0.3189528 | 11 | CREB1/PPP1R1B/TANC1/APP/SYNGAP1/HRH1/NF1/SLC1A2/MEIS2/SYNPO/NPHP4                                                                                                                                                                                                                                                            |
| Biological Process | GO:0032731 | positive regulation of interleukin-1 beta production                | 11/2279 | 53/18866  | 0.0493074 | 0.3524981 | 0.3189528 | 11 | AZU1/NLRC4/AIM2/NLRP3/SMAD3/TNF/MNDA/APP/NOD2/CASP1/STMP1                                                                                                                                                                                                                                                                    |
| Biological Process | GO:0032964 | collagen biosynthetic process                                       | 11/2279 | 53/18866  | 0.0493074 | 0.3524981 | 0.3189528 | 11 | PPARG/MIR145/MYB/TGFB1/ENG/ARRB2/COL5A1/F2R/NPPC/PDGFRB/P3H3                                                                                                                                                                                                                                                                 |
| Biological Process | GO:0045668 | negative regulation of osteoblast differentiation                   | 11/2279 | 53/18866  | 0.0493074 | 0.3524981 | 0.3189528 | 11 | HDAC4/HDAC7/SKI/SMAD3/SUFU/TNF/LIMD1/SEMA4D/TMEM64/MIR138-2/NOTCH1                                                                                                                                                                                                                                                           |
| Biological Process | GO:0045744 | negative regulation of G protein-coupled receptor signaling pathway | 11/2279 | 53/18866  | 0.0493074 | 0.3524981 | 0.3189528 | 11 | MGRN1/ARRB1/DNM2/CCL5/GNAI2/MRAP/GIPR/ARRB2/DNM1/RPH3AL/GRK2                                                                                                                                                                                                                                                                 |
| Biological Process | GO:0061614 | pri-miRNA transcription by RNA polymerase II                        | 11/2279 | 53/18866  | 0.0493074 | 0.3524981 | 0.3189528 | 11 | HDAC4/IL10/PPARG/SMAD3/TNF/TGFB1/LILRB4/PDGFB/ETS1/SREBF1/RELA                                                                                                                                                                                                                                                               |
| Biological Process | GO:0010721 | negative regulation of cell development                             | 52/2279 | 343/18866 | 0.0494465 | 0.3531707 | 0.3195614 | 52 | SEMA6B/CTS2/GFI1/TACSTD2/SORL1/CALR/CTDP1/KANK1/LSM1/YWHAH/SKI/ITGB1BP1/MIR199A1/TNF/BCL11A/SEMA4A/RTN4/PMP22/SEMA4B/DLL1/APP/MIB1/ACTN4/IFRD1/AP1/SYNGAP1/KREMEN1/SEMA4D/RAPGEF2/NF1/ITM2C/MEIS1/BCL2/DNM3/MIR199A2/NOTCH1/CORO1C/ZHX2/CDKL3/UBE3A/ARHGFE2/NPPC/LTF/CERS2/INPP5F/BAG5/RAP1GAP2/NODAL/HES3/RFLNA/PRAG1/SPART |
| Biological Process | GO:0006164 | purine nucleotide biosynthetic process                              | 32/2279 | 197/18866 | 0.0494889 | 0.3531707 | 0.3195614 | 32 | PRKAG2/RCVRN/AMPD3/ENO1/ADCY2/ACSL1/ADCY9/ACOT7/VPS9D1/ACSS1/SPHK2/TGFB1/SLC26A1/ACACB/ACSS2/GUK1/ADCY4/MTHFD1/PPCDC/PAPSS2/PKM/ACACA/ACSF3/AK2/AK5/NPPC/ACAT1/SCD/SLC25A1/PANK4/IMPDH1/ATP5PD                                                                                                                               |
| Biological Process | GO:0042246 | tissue regeneration                                                 | 15/2279 | 79/18866  | 0.049513  | 0.3531707 | 0.3195614 | 15 | CD9/GSN/NINJ2/MIR199A1/TGFBR2/NINJ1/IFRD1/PAX7/ENO3/CPQ/PKM/MIR199A2/NOTCH1/DYSF/EYS                                                                                                                                                                                                                                         |

|                    |            |                                                 |         |           |           |           |           |    |                                                                                                                    |
|--------------------|------------|-------------------------------------------------|---------|-----------|-----------|-----------|-----------|----|--------------------------------------------------------------------------------------------------------------------|
| Biological Process | GO:0014812 | muscle cell migration                           | 19/2279 | 106/18866 | 0.04994   | 0.3556818 | 0.3218335 | 19 | HDAC4/SORL1/PLAU/SSH1/MIR140/MIR143/ITGB1BP1/CCL5/ILK/P2RY6/PDGFD/ITGB3/PDGFB/NFE2L2/BCL2/MEF2C/PDGFRB/TRIB1/CCN4  |
| Biological Process | GO:1905269 | positive regulation of chromatin organization   | 19/2279 | 106/18866 | 0.04994   | 0.3556818 | 0.3218335 | 19 | BRD4/MYB/ARRB1/C6orf89/RPS6KA4/SPHK2/ZBTB7B/PAX7/CTBP1/ATF7IP/PHF19/DNMT1/PIH1D1/SREBF1/RNF40/KAT7/LIF/PAXIP1/NSD3 |
| Biological Process | GO:0002228 | natural killer cell mediated immunity           | 13/2279 | 66/18866  | 0.050168  | 0.3565039 | 0.3225774 | 13 | LYST/PIK3R6/SLAMF7/TUBB4B/RAB27A/CD226/HLA-F/PTPN6/NCR1/ARRB2/IL18RAP/CADM1/CD96                                   |
| Biological Process | GO:0032715 | negative regulation of interleukin-6 production | 13/2279 | 66/18866  | 0.050168  | 0.3565039 | 0.3225774 | 13 | IL10/C1QTNF3/MIR140/ARRB1/TNF/TNFAIP3/MIR101-2/TLR9/C5AR2/PTPN6/GHRL/CSK/ARRB2                                     |
| Biological Process | GO:0032922 | circadian regulation of gene expression         | 13/2279 | 66/18866  | 0.050168  | 0.3565039 | 0.3225774 | 13 | CSNK1D/KDM2A/ZFH3/HDAC1/MTA1/CSNK1E/PPP1CB/ARNTL/PER2/PER1/RAI1/USP2/NCOA2                                         |
| Biological Process | GO:0035821 | modulation of process of other organism         | 20/2279 | 113/18866 | 0.0505877 | 0.359063  | 0.324893  | 20 | DEFA4/SLPI/RXRA/CTDP1/ULK1/CCL5/CSF1R/SFTPD/HIPK2/HDAC1/PC/PABPN1/PHB/AQP1/TNIP1/MPEG1/LTF/BCL2L1/CPSF4/PRKN       |
| Biological Process | GO:0006907 | pinocytosis                                     | 6/2279  | 23/18866  | 0.050906  | 0.359063  | 0.324893  | 6  | ANKFY1/DNM2/ACTN4/NR1H2/MAPKAPK3/DOCK2                                                                             |
| Biological Process | GO:0007617 | mating behavior                                 | 6/2279  | 23/18866  | 0.050906  | 0.359063  | 0.324893  | 6  | HDAC4/HEXB/PPP1R1B/APP/NCOA1/MAPK8IP2                                                                              |
| Biological Process | GO:0031280 | negative regulation of cyclase activity         | 6/2279  | 23/18866  | 0.050906  | 0.359063  | 0.324893  | 6  | CCR2/GNAI2/AKAP5/LTB4R2/PALM/GABBR2                                                                                |

|                    |            |                                                                |         |          |           |           |          |    |                                                                                              |
|--------------------|------------|----------------------------------------------------------------|---------|----------|-----------|-----------|----------|----|----------------------------------------------------------------------------------------------|
| Biological Process | GO:0031639 | plasminogen activation                                         | 6/2279  | 23/18866 | 0.050906  | 0.359063  | 0.324893 | 6  | CTS2/ENO1/PLAU/THBS1/F12/CPB2                                                                |
| Biological Process | GO:0035743 | CD4-positive, alpha-beta T cell cytokine production            | 6/2279  | 23/18866 | 0.050906  | 0.359063  | 0.324893 | 6  | PRKCZ/CD55/NLRP3/IL1R1/IL18RAP/IL18R1                                                        |
| Biological Process | GO:0060044 | negative regulation of cardiac muscle cell proliferation       | 6/2279  | 23/18866 | 0.050906  | 0.359063  | 0.324893 | 6  | MIR199A1/VGLL4/TGFB2/RIPK1/MEIS1/MIR199A2                                                    |
| Biological Process | GO:0071404 | cellular response to low-density lipoprotein particle stimulus | 6/2279  | 23/18866 | 0.050906  | 0.359063  | 0.324893 | 6  | CD9/PPARG/ABCA1/ITGB2/NPC1/HMGCS1                                                            |
| Biological Process | GO:1902001 | fatty acid transmembrane transport                             | 6/2279  | 23/18866 | 0.050906  | 0.359063  | 0.324893 | 6  | PRKAG2/THBS1/ACACB/ACACA/SLC2A1/CPT1A                                                        |
| Biological Process | GO:1903077 | negative regulation of protein localization to plasma membrane | 6/2279  | 23/18866 | 0.050906  | 0.359063  | 0.324893 | 6  | MRAP/PPFIA1/TGFB1/NUMB/CSK/BCL2L1                                                            |
| Biological Process | GO:0045445 | myoblast differentiation                                       | 16/2279 | 86/18866 | 0.0511141 | 0.3599439 | 0.32569  | 16 | MAML1/TNF/DLL1/RBPJ/TCF7L2/IFRD1/PLEKHM3/ILK/TGFB1/PLCB1/ANKRD2/RB1/NOTCH1/CMTM5/MEF2C/EPAS1 |
| Biological Process | GO:0006378 | mRNA polyadenylation                                           | 10/2279 | 47/18866 | 0.0511445 | 0.3599439 | 0.32569  | 10 | FIP1L1/CPSF3/APP/CPEB3/SCAF8/ZC3H3/RNF40/TUT1/PAPOLG/GRSF1                                   |
| Biological Process | GO:0034204 | lipid translocation                                            | 10/2279 | 47/18866 | 0.0511445 | 0.3599439 | 0.32569  | 10 | ABCC1/TMEM30A/ABCG1/ATP8A1/ANO7/ATP11A/ATP8B1/ABCA1/ATP8B4/ANO6                              |

|                    |            |                                                                                           |         |           |           |           |           |    |                                                                                                                                                                                                                                                                                                                                                       |
|--------------------|------------|-------------------------------------------------------------------------------------------|---------|-----------|-----------|-----------|-----------|----|-------------------------------------------------------------------------------------------------------------------------------------------------------------------------------------------------------------------------------------------------------------------------------------------------------------------------------------------------------|
| Biological Process | GO:0009132 | nucleoside diphosphate metabolic process                                                  | 26/2279 | 155/18866 | 0.0514784 | 0.3620256 | 0.3275736 | 26 | FOXK1/HDAC4/PRKAG2/AMPD3/ENO1/HK1/TJP2/PFKFB4/RAE1/CBFA2T3/DHTKD1/APP/OGDH/ADPGK/PGAM1/NUP93/ENO3/HK2/SEC13/GUK1/ESRRB/PKM/AK2/AK5/PFKFB3/PRKA<br>A1                                                                                                                                                                                                  |
| Biological Process | GO:0043280 | positive regulation of cysteine-type endopeptidase activity involved in apoptotic process | 23/2279 | 134/18866 | 0.0515589 | 0.3623234 | 0.3278431 | 23 | NLRC4/S100A8/GRAMD4/PPARG/GSN/LCK/NLRP3/SMAD3/ARRB1/TNF/TRAF2/CTSD/CTSH/RIPK1/BCL10/ATP2A3/FIS1/P2RX1/F2R/CASP1/BCL2L13/NODAL/FADD                                                                                                                                                                                                                    |
| Biological Process | GO:0001889 | liver development                                                                         | 24/2279 | 141/18866 | 0.0516277 | 0.3625389 | 0.3280381 | 24 | ARID5B/IL10/RPS6KA1/SMAD3/TNFAIP3/E2F7/CUL3/TAF10/HNF1A/RARA/NF1/SP3/PKM/NOTCH1/CPB2/HMGCL/HLX/PCK2/CEBPB/ACAT1/HMGCS1/RELA/ALDH1A2/NODAL                                                                                                                                                                                                             |
| Biological Process | GO:0007178 | transmembrane receptor protein serine/threonine kinase signaling pathway                  | 54/2279 | 359/18866 | 0.0519504 | 0.364535  | 0.3298443 | 54 | LRG1/PRKCZ/LTBP1/SPRED2/SORL1/MIR140/CREB1/LNPEP/SKI/TGFBRAP1/SMAD3/LDLRAD4/DNM2/HIPK2/DUSP22/CHST11/TGFBR2/THBS1/RBPJ/UBE2O/ILK/PCSK6/SMAD7/PXN/Z<br>MIZ1/ITGB5/TGFB1/SMURF1/NUP93/TGFB11/BMPER/WWTR1/BMPR1B/RUNX2/HTRA4/NUMA1/CREBBP/ENG/ARRB2/PRDM16/ARHGEF18/NOTCH1/GCNT2/RBPMS/SUB1/SLC33A1<br>/HTRA3/GDF6/ZC3H3/ZNF423/INHBA/NODAL/ZFYVE9/SPART |
| Biological Process | GO:0007204 | positive regulation of cytosolic calcium ion concentration                                | 49/2279 | 322/18866 | 0.052183  | 0.3658975 | 0.3310771 | 49 | TRPM2/PDE4D/C3AR1/CASQ2/ITPR2/LCK/CD55/CACNA1C/CCR2/SLC8A1/MIR199A1/UBASH3B/FPR2/FPR1/ITPR1/ACKR2/JSRP1/C5AR2/PTPN6/RASA3/GNAT2/P2RY6/CCR9/MYO5A/G<br>IPR/HTT/GHRL/PTPRC/CXCR1/NOL3/TPCN2/FIS1/BCL2/MIR199A2/GSTO1/LPAR2/PRKCE/F2R/S1PR4/GPR4/AGTR1/ANK2/CHERP/PLCG1/P2RX5/TRPV2/CASQ1/CX3CR1/SYNPO                                                   |
| Biological Process | GO:0030510 | regulation of BMP signaling pathway                                                       | 17/2279 | 93/18866  | 0.0523845 | 0.3667687 | 0.3318653 | 17 | SORL1/MIR140/SKI/HIPK2/RBPJ/UBE2O/ILK/PCSK6/SMAD7/SMURF1/BMPER/NUMA1/ENG/NOTCH1/HTRA3/ZNF423/SPART                                                                                                                                                                                                                                                    |
| Biological Process | GO:0032677 | regulation of interleukin-8 production                                                    | 17/2279 | 93/18866  | 0.0523845 | 0.3667687 | 0.3318653 | 17 | ELANE/IL10/ARRB1/TNF/TLR9/RIPK1/C5AR2/ZNF580/FCN1/PTPRC/BCL10/NOD2/F2R/RELA/CD33/BCL3/FADD                                                                                                                                                                                                                                                            |
| Biological Process | GO:1903779 | regulation of cardiac conduction                                                          | 14/2279 | 73/18866  | 0.0525249 | 0.3673817 | 0.33242   | 14 | PDE4D/CASQ2/ITPR2/FXYD2/FXYD1/SLC8A1/GJA5/ATP2B2/ITPR1/ATP2A3/NPPC/ANK2/ASPH/CASQ1                                                                                                                                                                                                                                                                    |
| Biological Process | GO:0030890 | positive regulation of B cell proliferation                                               | 9/2279  | 41/18866  | 0.0525881 | 0.3673817 | 0.33242   | 9  | NFATC2/TNFSF13B/TLR9/PTPRC/CD320/BCL2/MEF2C/PELI1/VAV3                                                                                                                                                                                                                                                                                                |

|                    |            |                                                                   |         |           |           |           |           |    |                                                                                                                                                                                                                                                                                                                                                                                                                                   |
|--------------------|------------|-------------------------------------------------------------------|---------|-----------|-----------|-----------|-----------|----|-----------------------------------------------------------------------------------------------------------------------------------------------------------------------------------------------------------------------------------------------------------------------------------------------------------------------------------------------------------------------------------------------------------------------------------|
| Biological Process | GO:0050832 | defense response to fungus                                        | 9/2279  | 41/18866  | 0.0525881 | 0.3673817 | 0.33242   | 9  | DEFA4/ELANE/S100A8/CTSG/MPO/COTL1/SPON2/C10orf99/LTF                                                                                                                                                                                                                                                                                                                                                                              |
| Biological Process | GO:0032732 | positive regulation of interleukin-1 production                   | 12/2279 | 60/18866  | 0.0528266 | 0.3687771 | 0.3336827 | 12 | AZU1/NLRC4/AIM2/IL16/NLRP3/SMAD3/TNF/MNDA/APP/NOD2/CASP1/STMP1                                                                                                                                                                                                                                                                                                                                                                    |
| Biological Process | GO:0072521 | purine-containing compound metabolic process                      | 69/2279 | 472/18866 | 0.0530126 | 0.3690156 | 0.3338984 | 69 | FOXK1/HDAC4/PDE4D/PRKAG2/RCVRN/AMPD3/ENO1/HK1/ADCY2/ACSL1/FAR2/TJP2/ADCY9/PFKFB4/ACOT13/SULT6B1/MACROD1/RAE1/CBFA2T3/ABHD14B/DHTKD1/SLC2A9/APP/OGDH/NUDT3/ADPGK/ACOT7/VPS9D1/PGAM1/ACSS1/SPHK2/TGFB1/SULT1A2/SLC26A1/SLC22A11/NUP93/ENO3/HK2/SEC13/ACACB/ACSS2/PDE9A/PNP/GUK1/ADCY4/ESRRB/MTHFD1/PPCDC/PAPSS2/PKM/ACACA/ACSF3/AK2/GMPR2/AK5/HMGCL/NPPC/ACAT1/HMGCS1/SCD/TPST1/PFKFB3/SLC25A1/PANK4/IMPDH1/PRKAA1/AOX1/ATP5PD/ACP3 |
| Biological Process | GO:0036336 | dendritic cell migration                                          | 7/2279  | 29/18866  | 0.0530539 | 0.3690156 | 0.3338984 | 7  | TRPM2/CALR/CCR2/CCL5/DOCK8/CXCR1/ANO6                                                                                                                                                                                                                                                                                                                                                                                             |
| Biological Process | GO:0060351 | cartilage development involved in endochondral bone morphogenesis | 7/2279  | 29/18866  | 0.0530539 | 0.3690156 | 0.3338984 | 7  | ANXA6/TGFBR2/POC1A/RARA/POR/RARG/NPPC                                                                                                                                                                                                                                                                                                                                                                                             |
| Biological Process | GO:2000108 | positive regulation of leukocyte apoptotic process                | 7/2279  | 29/18866  | 0.0530539 | 0.3690156 | 0.3338984 | 7  | IL10/PIK3CD/CCL5/RAPGEF2/ZC3H8/BLK/MEF2C                                                                                                                                                                                                                                                                                                                                                                                          |
| Biological Process | GO:0098656 | anion transmembrane transport                                     | 48/2279 | 315/18866 | 0.0531198 | 0.3690156 | 0.3338984 | 48 | SLC38A4/PRKAG2/CLCN6/SLC38A10/ABCC1/SLC16A3/SLC35C2/SLC24A4/FXYD1/SLC1A5/ANO7/SLC15A4/THBS1/SLC44A4/RIPK1/LRRC8C/SLC13A4/SLC43A2/SLC19A1/SLC26A1/SLC1A2/SLC7A7/SLC7A5/ACACB/SLC1A6/SLC37A1/MFSD10/PER2/SLC16A1/SLC36A3/SLC1A3/LRRC8B/ACACA/SLC43A1/ANO10/SLC2A1/ANO6/SLC7A8/SLC13A5/CPT1A/SLC12A1/ANO8/SLC7A1/SLC12A7/SLC25A1/SLC23A1/AQP9/PACC1                                                                                  |
| Biological Process | GO:0030513 | positive regulation of BMP signaling pathway                      | 8/2279  | 35/18866  | 0.0533696 | 0.3690156 | 0.3338984 | 8  | MIR140/RBPJ/UBE2O/ILK/NUMA1/ENG/NOTCH1/ZNF423                                                                                                                                                                                                                                                                                                                                                                                     |
| Biological Process | GO:0034390 | smooth muscle cell apoptotic process                              | 8/2279  | 35/18866  | 0.0533696 | 0.3690156 | 0.3338984 | 8  | PPARG/MIR140/ARRB1/E2F3/MIR24-2/ARRB2/MIR138-2/DNMT1                                                                                                                                                                                                                                                                                                                                                                              |



|                    |            |                                                              |         |           |           |           |           |    |                                                                                                                                                                                                                                                                                                                                                                                            |
|--------------------|------------|--------------------------------------------------------------|---------|-----------|-----------|-----------|-----------|----|--------------------------------------------------------------------------------------------------------------------------------------------------------------------------------------------------------------------------------------------------------------------------------------------------------------------------------------------------------------------------------------------|
| Biological Process | GO:0034391 | regulation of smooth muscle cell apoptotic process           | 8/2279  | 35/18866  | 0.0533696 | 0.3690156 | 0.3338984 | 8  | PPARG/MIR140/ARRB1/E2F3/MIR24-2/ARRB2/MIR138-2/DNMT1                                                                                                                                                                                                                                                                                                                                       |
| Biological Process | GO:0036314 | response to sterol                                           | 8/2279  | 35/18866  | 0.0533696 | 0.3690156 | 0.3338984 | 8  | GPLD1/TGFBR2/TGFB1/MLC1/ABCA1/GRAMD1A/HMGCS1/INHBA                                                                                                                                                                                                                                                                                                                                         |
| Biological Process | GO:0060251 | regulation of glial cell proliferation                       | 8/2279  | 35/18866  | 0.0533696 | 0.3690156 | 0.3338984 | 8  | CREB1/MYB/SKI/TNF/PRKCH/PRKCI/NOTCH1/CERS2                                                                                                                                                                                                                                                                                                                                                 |
| Biological Process | GO:0097009 | energy homeostasis                                           | 8/2279  | 35/18866  | 0.0533696 | 0.3690156 | 0.3338984 | 8  | AMPD3/MFSD2A/DLL1/CRTC3/ACACB/FOXO1/EIF4G1/PRKAA1                                                                                                                                                                                                                                                                                                                                          |
| Biological Process | GO:1900077 | negative regulation of cellular response to insulin stimulus | 8/2279  | 35/18866  | 0.0533696 | 0.3690156 | 0.3338984 | 8  | PRKCZ/KANK1/PTPRE/GRB10/PRKCB/TSC2/RELA/PRKAA1                                                                                                                                                                                                                                                                                                                                             |
| Biological Process | GO:0070301 | cellular response to hydrogen peroxide                       | 18/2279 | 100/18866 | 0.0533733 | 0.3690156 | 0.3338984 | 18 | TRPM2/IL10/LCN2/MYB/TNFAIP3/RIPK1/PAX2/ZNF580/AQP1/RIPK3/PDGFD/ETS1/NFE2L2/IL18RAP/PDGFRB/FOXO1/RELA/PRKAA1                                                                                                                                                                                                                                                                                |
| Biological Process | GO:0019693 | ribose phosphate metabolic process                           | 63/2279 | 427/18866 | 0.0534045 | 0.3690156 | 0.3338984 | 63 | FO XK1/HDAC4/PDE4D/PRKAG2/AMPD3/ENO1/HK1/ADCY2/ACSL1/FAR2/TJP2/ADCY9/PFKFB4/ACOT13/SULT6B1/RAE1/CBFA2T3/ABHD14B/DHTKD1/APP/OGDH/NUDT3/ADPGK/ACOT7/VPS9D1/PGAM1/ACSS1/SPHK2/TGFB1/SULT1A2/SLC26A1/UCK2/NUP93/ENO3/HK2/SEC13/ACACB/ACSS2/PDE9A/GUK1/ADCY4/ESRRB/PPCDC/PAPSS2/PKM/ACACA/ACSF3/AK2/GMPR2/AK5/HMGCL/NPPC/ACAT1/HMGCS1/SCD/TPST1/PFKFB3/DHODH/SLC25A1/PANK4/IMPDH1/PRKAA1/ATP5PD |
| Biological Process | GO:0001936 | regulation of endothelial cell proliferation                 | 30/2279 | 184/18866 | 0.0534648 | 0.3691637 | 0.3340324 | 30 | LRG1/RPTOR/NRP2/IL10/PPARG/PRKCA/TNF/EGFL7/MIR101-2/STAT5A/THBS1/AKT3/MIR24-2/MIR27A/MIR23A/FLT1/FGFR1/ZNF580/NF1/ITGB3/GHRL/PDGFB/VASH1/MEF2C/AGTR1/DYSF/PPP1R16B/TNFSF12/PLCG1/ALDH1A2                                                                                                                                                                                                   |
| Biological Process | GO:0099003 | vesicle-mediated transport in synapse                        | 35/2279 | 220/18866 | 0.0535649 | 0.3695861 | 0.3344146 | 35 | SYNJ2/DENND1A/PRKAR1B/RAP1B/PLD1/DNM2/ITSN1/STON1/GIT1/DDC/SYN3/APBA2/DGKQ/PRKCB/NRXN1/VPS18/SYN2/CTBP2/NUMB/ITGB3/ACTG1/CHRM2/SH3GL1/GSG1L/DNM1/DNM3/P2RX1/DNM1L/SYT17/EPS15/AP3D1/MX1/CYFIP1/DTNBP1/FGF14                                                                                                                                                                                |

|                    |            |                                                 |         |           |           |           |           |    |                                                                                                                                                                                                                          |
|--------------------|------------|-------------------------------------------------|---------|-----------|-----------|-----------|-----------|----|--------------------------------------------------------------------------------------------------------------------------------------------------------------------------------------------------------------------------|
| Biological Process | GO:0014897 | striated muscle hypertrophy                     | 19/2279 | 107/18866 | 0.0541214 | 0.3728845 | 0.3373991 | 19 | HDAC4/CTDP1/TTN/MIR145/AKAP13/TNFRSF1B/SMAD3/PRKCA/MIR199A1/MIR24-2/MIR23A/TNFRSF1A/CAMTA2/PDE9A/MIR199A2/NOTCH1/MEF2C/FOXO1/INPP5F                                                                                      |
| Biological Process | GO:0030148 | sphingolipid biosynthetic process               | 19/2279 | 107/18866 | 0.0541214 | 0.3728845 | 0.3373991 | 19 | SPTLC2/TNF/ORMDL3/CERS6/TNFRSF1A/SPHK2/SGMS1/ST8SIA6/SGMS2/B4GALT3/SGPP1/SGPP2/P2RX1/FA2H/CERS2/SIRT3/PRKAA1/TLCD3B/PLPP3                                                                                                |
| Biological Process | GO:0016051 | carbohydrate biosynthetic process               | 34/2279 | 213/18866 | 0.0542422 | 0.373446  | 0.3379072 | 34 | CSGALNACT1/MAEA/ENO1/AP2A1/C1QTNF3/ST6GALNAC1/CHST11/PGP/CHST15/NDST1/PGAM1/P2RY6/PC/TGFB1/HRH1/DGKQ/ENO3/DYRK2/ST8SIA6/PDGFB/ST3GAL4/PPP1CB/IMPA2/ESRRB/PER2/PCK2/SLC2A1/FOXO1/SOGA1/SLC25A1/HAS3/ST3GAL2/B3GNT2/SDHAF3 |
| Biological Process | GO:0003279 | cardiac septum development                      | 20/2279 | 114/18866 | 0.0546636 | 0.3760745 | 0.3402856 | 20 | LTBP1/ZFPM1/NRP2/MAML1/DNM2/SUFU/GJA5/TGFBR2/NDST1/RBPJ/SMAD7/WNT11/RARA/ENG/NOTCH1/SLIT3/ANK2/LMO4/CPLANE1/NSD2                                                                                                         |
| Biological Process | GO:0031056 | regulation of histone modification              | 25/2279 | 149/18866 | 0.0551653 | 0.3792513 | 0.34316   | 25 | GFI1/BRD4/MYB/SKI/ARRB1/C6orf89/OTUB2/RPS6KA4/SPHK2/ZBTB7B/PAX7/CTBP1/KDM4C/ZNF335/PHF19/OTUB1/DNMT1/PIH1D1/TRIP12/SREBF1/RNF40/KAT7/LIF/PAXIP1/NSD3                                                                     |
| Biological Process | GO:0046939 | nucleotide phosphorylation                      | 23/2279 | 135/18866 | 0.0553245 | 0.3800709 | 0.3439017 | 23 | FOXK1/HDAC4/PRKAG2/ENO1/HK1/PFKFB4/RAE1/CBFA2T3/DHTKD1/APP/OGDH/ADPGK/PGAM1/NUP93/ENO3/HK2/SEC13/GUK1/ESRRB/PKM/AK5/PFKFB3/PRKAA1                                                                                        |
| Biological Process | GO:0009620 | response to fungus                              | 11/2279 | 54/18866  | 0.0554355 | 0.3802833 | 0.3440938 | 11 | DEFA4/ELANE/S100A8/CTSG/MPO/COTL1/SPON2/SCIMP/BCL10/C10orf99/LTF                                                                                                                                                         |
| Biological Process | GO:0032757 | positive regulation of interleukin-8 production | 11/2279 | 54/18866  | 0.0554355 | 0.3802833 | 0.3440938 | 11 | ELANE/TNF/TLR9/RIPK1/ZNF580/FCN1/BCL10/NOD2/F2R/RELA/FADD                                                                                                                                                                |
| Biological Process | GO:0071300 | cellular response to retinoic acid              | 13/2279 | 67/18866  | 0.0556428 | 0.3814299 | 0.3451313 | 13 | PPARG/CREB1/MYB/TESC/WNT11/PAX2/AQP1/RARG/WNT5B/ABCA1/GJB3/TEAD2/ALDH1A2                                                                                                                                                 |

|                    |            |                                         |         |           |           |           |           |    |                                                                                                                                                                                                                                                                                  |
|--------------------|------------|-----------------------------------------|---------|-----------|-----------|-----------|-----------|----|----------------------------------------------------------------------------------------------------------------------------------------------------------------------------------------------------------------------------------------------------------------------------------|
| Biological Process | GO:0048013 | ephrin receptor signaling pathway       | 16/2279 | 87/18866  | 0.0558959 | 0.3828888 | 0.3464514 | 16 | AP2A1/ARHGEF7/NCK2/EPHB3/ITSN1/GIT1/RBPJ/SDC2/WASL/VAV2/ACTG1/SIPA1L1/DNM1/NTRK1/ARHGEF28/VAV3                                                                                                                                                                                   |
| Biological Process | GO:0044262 | cellular carbohydrate metabolic process | 45/2279 | 294/18866 | 0.0559996 | 0.3833228 | 0.3468441 | 45 | CSGALNACT1/MAEA/FOXK1/HDAC4/PRKAG2/SYNJ2/NAGK/HK1/C1QTNF3/INPP5A/PFKFB4/GPLD1/AOAH/MGAM/CBFA2T3/PGP/NDST1/ENOSF1/PGAM1/P2RY6/HRH1/DGKQ/DYRK2/HK2/GNB3/ACACB/INPP5E/PPP1CB/IMPA2/ESRRB/PER2/PRKCE/PCK2/PCDH12/SLC2A1/FOXO1/DYSF/NCOA2/SOGA1/PFKFB3/HAS3/B3GNT2/PRKN/SDHAF3/RUBCNL |
| Biological Process | GO:0051304 | chromosome separation                   | 17/2279 | 94/18866  | 0.0570475 | 0.3877581 | 0.3508573 | 17 | MAD1L1/NSMCE2/RECQL5/CUL3/EME1/MEIOB/CDC16/TACC3/NUMA1/PPP2R1A/NEK6/RB1/DIS3L2/ANAPC7/HECW2/SLX4/PCID2                                                                                                                                                                           |
| Biological Process | GO:0010885 | regulation of cholesterol storage       | 5/2279  | 18/18866  | 0.0570965 | 0.3877581 | 0.3508573 | 5  | EHD1/PPARG/ABCG1/NR1H2/ABCA1                                                                                                                                                                                                                                                     |
| Biological Process | GO:0034199 | activation of protein kinase A activity | 5/2279  | 18/18866  | 0.0570965 | 0.3877581 | 0.3508573 | 5  | ADCY2/PRKAR1B/ADCY9/ADCY4/PRRC1                                                                                                                                                                                                                                                  |
| Biological Process | GO:0043217 | myelin maintenance                      | 5/2279  | 18/18866  | 0.0570965 | 0.3877581 | 0.3508573 | 5  | SH3TC2/NDRG1/CLU/EPB41L3/FA2H                                                                                                                                                                                                                                                    |
| Biological Process | GO:0051782 | negative regulation of cell division    | 5/2279  | 18/18866  | 0.0570965 | 0.3877581 | 0.3508573 | 5  | BLM/MIR145/E2F7/C10orf99/ZFYVE19                                                                                                                                                                                                                                                 |
| Biological Process | GO:0051923 | sulfation                               | 5/2279  | 18/18866  | 0.0570965 | 0.3877581 | 0.3508573 | 5  | HS3ST3B1/CHSY1/NDST1/SULT1A2/TPST1                                                                                                                                                                                                                                               |
| Biological Process | GO:0071545 | inositol phosphate catabolic process    | 5/2279  | 18/18866  | 0.0570965 | 0.3877581 | 0.3508573 | 5  | SYNJ2/INPP5A/NUDT3/INPP5E/IMPA2                                                                                                                                                                                                                                                  |

|                    |            |                                                     |         |           |           |           |           |    |                                                                                                                                                                            |
|--------------------|------------|-----------------------------------------------------|---------|-----------|-----------|-----------|-----------|----|----------------------------------------------------------------------------------------------------------------------------------------------------------------------------|
| Biological Process | GO:0099010 | modification of postsynaptic structure              | 5/2279  | 18/18866  | 0.0570965 | 0.3877581 | 0.3508573 | 5  | ITSN1/BAIAP2/PFN1/CYFIP1/SYNPO                                                                                                                                             |
| Biological Process | GO:1901524 | regulation of mitophagy                             | 5/2279  | 18/18866  | 0.0570965 | 0.3877581 | 0.3508573 | 5  | VPS13D/SMURF1/CLEC16A/TSC2/PRKN                                                                                                                                            |
| Biological Process | GO:1905049 | negative regulation of metalloproteinase activity   | 5/2279  | 18/18866  | 0.0570965 | 0.3877581 | 0.3508573 | 5  | TIMP2/SORL1/MIR199A1/MIR24-2/MIR199A2                                                                                                                                      |
| Biological Process | GO:1990000 | amyloid fibril formation                            | 5/2279  | 18/18866  | 0.0570965 | 0.3877581 | 0.3508573 | 5  | GSN/RIPK1/APP/CLU/RIPK3                                                                                                                                                    |
| Biological Process | GO:0060401 | cytosolic calcium ion transport                     | 29/2279 | 178/18866 | 0.0572645 | 0.3884654 | 0.3514972 | 29 | TRPM2/PDE4D/CASQ2/ITPR2/LCK/CACNA1C/SLC8A1/UBASH3B/ITPR1/JSRP1/PTPN6/RASA3/P2RY6/MYO5A/HTT/PTPRC/ATP2A3/NOL3/TPCN2/BCL2/GSTO1/PRKCE/F2R/ANK2/CHERP/PLCG1/P2RX5/TRPV2/CASQ1 |
| Biological Process | GO:0034121 | regulation of toll-like receptor signaling pathway  | 14/2279 | 74/18866  | 0.0578771 | 0.3884654 | 0.3514972 | 14 | GFI1/GRAMD4/MIR140/SMPDL3B/TNFAIP3/TLR9/RTN4/TREML4/ARRB2/WDFY1/LTF/TYRO3/FLOT1/PELI1                                                                                      |
| Biological Process | GO:0051865 | protein autoubiquitination                          | 14/2279 | 74/18866  | 0.0578771 | 0.3884654 | 0.3514972 | 14 | RNF220/WWP2/AMFR/TRAF2/CUL3/UHRF1/MTA1/SH3RF3/RNF213/UBE3A/RNF11/UBE2D2/PRKN/MARCHF7                                                                                       |
| Biological Process | GO:0014911 | positive regulation of smooth muscle cell migration | 10/2279 | 48/18866  | 0.0578953 | 0.3884654 | 0.3514972 | 10 | HDAC4/SSH1/MIR143/CCL5/P2RY6/PDGFD/PDGFB/BCL2/PDGFRB/CCN4                                                                                                                  |
| Biological Process | GO:0042461 | photoreceptor cell development                      | 10/2279 | 48/18866  | 0.0578953 | 0.3884654 | 0.3514972 | 10 | MFSD2A/CRB1/GNAT2/IFT140/PRKCI/RPGRIP1/CDHR1/NRL/CABP4/NPHP4                                                                                                               |

|                    |            |                                                  |         |           |           |           |           |    |                                                                                                                                                                                                                                                             |
|--------------------|------------|--------------------------------------------------|---------|-----------|-----------|-----------|-----------|----|-------------------------------------------------------------------------------------------------------------------------------------------------------------------------------------------------------------------------------------------------------------|
| Biological Process | GO:0043631 | RNA polyadenylation                              | 10/2279 | 48/18866  | 0.0578953 | 0.3884654 | 0.3514972 | 10 | FIP1L1/CPSF3/APP/CPEB3/SCAF8/ZC3H3/RNF40/TUT1/PAPOLG/GRSF1                                                                                                                                                                                                  |
| Biological Process | GO:0046461 | neutral lipid catabolic process                  | 10/2279 | 48/18866  | 0.0578953 | 0.3884654 | 0.3514972 | 10 | PNPLA2/SORL1/MGLL/LIPC/ABHD16A/GPLD1/ABHD16B/FABP6/ABHD5/LYPLA2                                                                                                                                                                                             |
| Biological Process | GO:0046464 | acylglycerol catabolic process                   | 10/2279 | 48/18866  | 0.0578953 | 0.3884654 | 0.3514972 | 10 | PNPLA2/SORL1/MGLL/LIPC/ABHD16A/GPLD1/ABHD16B/FABP6/ABHD5/LYPLA2                                                                                                                                                                                             |
| Biological Process | GO:0099637 | neurotransmitter receptor transport              | 10/2279 | 48/18866  | 0.0578953 | 0.3884654 | 0.3514972 | 10 | DNM2/NUMB/ITGB3/KIF5C/GSG1L/DNM1/DNM3/EPS15/AP3D1/MX1                                                                                                                                                                                                       |
| Biological Process | GO:0060560 | developmental growth involved in morphogenesis   | 37/2279 | 236/18866 | 0.0579003 | 0.3884654 | 0.3514972 | 37 | SEMA6B/PRKCZ/CPNE6/NRP2/ULK1/CTTN/DNM2/CPNE5/ZEB2/CYFIP2/BCL11A/SEMA4A/RTN4/TGFBR2/DISC1/SEMA4B/APP/IFRD1/ILK/CPNE1/WNT11/SEMA4D/RDH10/SMURF1/RARG/CDH4/NOTCH1/CDKL3/SYT17/SLIT3/CYFIP1/TRPV2/NDEL1/SLIT1/DBNL/SPART/PRKN                                   |
| Biological Process | GO:0010522 | regulation of calcium ion transport into cytosol | 18/2279 | 101/18866 | 0.0579155 | 0.3884654 | 0.3514972 | 18 | PDE4D/CASQ2/CACNA1C/SLC8A1/UBASH3B/JSRP1/PTPN6/P2RY6/MYO5A/HTT/BCL2/GSTO1/PRKCE/F2R/ANK2/PLCG1/P2RX5/CASQ1                                                                                                                                                  |
| Biological Process | GO:0032637 | interleukin-8 production                         | 18/2279 | 101/18866 | 0.0579155 | 0.3884654 | 0.3514972 | 18 | ELANE/IL10/CHI3L1/ARRB1/TNF/TLR9/RIPK1/C5AR2/ZNF580/FCN1/PTPRC/BCL10/NOD2/F2R/RELA/CD33/BCL3/FADD                                                                                                                                                           |
| Biological Process | GO:0042116 | macrophage activation                            | 18/2279 | 101/18866 | 0.0579155 | 0.3884654 | 0.3514972 | 18 | AZU1/FOXP1/SBNO2/IL10/MIR145/SLC11A1/TNF/MYO18A/FPR2/THBS1/APP/CLU/CRTC3/PTPRC/GRN/ITGB2/PRKCE/DYSF                                                                                                                                                         |
| Biological Process | GO:0071559 | response to transforming growth factor beta      | 40/2279 | 258/18866 | 0.0580982 | 0.3884654 | 0.3514972 | 40 | LRG1/PRKCZ/LTBP1/SPRED2/CREB1/SKI/TGFBRAP1/SMAD3/COL4A2/LDLRAD4/DNM2/HIPK2/DUSP22/CHST11/ZFH3/TGFBR2/THBS1/MIR27A/SMAD7/PXN/ZMIZ1/ITGB5/TGFB1/SMURF1/PDGFD/TGFB11/HTRA4/CREBBP/ENG/ARRB2/PRDM16/ARHGEF18/GCNT2/MEF2C/HTRA3/RUNX3/ANKRD1/NODAL/ZFYVE9/CX3CR1 |

|                    |            |                                                                                |         |           |           |           |           |    |                                                                                                                                                          |
|--------------------|------------|--------------------------------------------------------------------------------|---------|-----------|-----------|-----------|-----------|----|----------------------------------------------------------------------------------------------------------------------------------------------------------|
| Biological Process | GO:0010770 | positive regulation of cell morphogenesis involved in differentiation          | 26/2279 | 157/18866 | 0.0585913 | 0.3884654 | 0.3514972 | 26 | P4HB/PLXNC1/RREB1/CALR/DOCK1/ARHGEF7/DNM2/ZEB2/DISC1/CUX1/BAIAP2/ILK/PREX1/SEMA4D/SS18L2/OLFM4/CDH4/CASS4/CDKL3/DNM1L/CYFIP1/TRPV2/NDEL1/MYADM/CUX2/DBNL |
| Biological Process | GO:0003170 | heart valve development                                                        | 12/2279 | 61/18866  | 0.0588349 | 0.3884654 | 0.3514972 | 12 | ZFPM1/TNFRSF1B/GJA5/NFATC1/TGFBR2/RBPJ/TNFRSF1A/TGFB1/RB1/NOTCH1/MEF2C/SLIT3                                                                             |
| Biological Process | GO:0016266 | O-glycan processing                                                            | 12/2279 | 61/18866  | 0.0588349 | 0.3884654 | 0.3514972 | 12 | GALNT2/XXYLT1/GALNT12/MUC12/GXYLT2/MUC20/B3GNT5/ST6GAL1/ST3GAL4/GALNT9/ST3GAL2/B3GNT2                                                                    |
| Biological Process | GO:0033619 | membrane protein proteolysis                                                   | 12/2279 | 61/18866  | 0.0588349 | 0.3884654 | 0.3514972 | 12 | PRTN3/TIMP2/IL10/TNFRSF1B/MBTPS1/GPLD1/TNF/MYH9/HM13/CTSH/TGFB1/RELA                                                                                     |
| Biological Process | GO:0042267 | natural killer cell mediated cytotoxicity                                      | 12/2279 | 61/18866  | 0.0588349 | 0.3884654 | 0.3514972 | 12 | LYST/PIK3R6/SLAMF7/TUBB4B/RAB27A/CD226/HLA-F/PTPN6/NCR1/ARRB2/IL18RAP/CADM1                                                                              |
| Biological Process | GO:0045576 | mast cell activation                                                           | 12/2279 | 61/18866  | 0.0588349 | 0.3884654 | 0.3514972 | 12 | LAT/PIK3CD/RHOH/NDRG1/GAB2/FGR/CD84/CD226/SPHK2/FER/BLK/CNR2                                                                                             |
| Biological Process | GO:0046324 | regulation of glucose import                                                   | 12/2279 | 61/18866  | 0.0588349 | 0.3884654 | 0.3514972 | 12 | PRKAG2/MIR143/PIK3R1/TNF/GRB10/SLC1A2/HK2/PRKCI/NFE2L2/RTN2/ASPSCR1/CLTCL1                                                                               |
| Biological Process | GO:1902041 | regulation of extrinsic apoptotic signaling pathway via death domain receptors | 12/2279 | 61/18866  | 0.0588349 | 0.3884654 | 0.3514972 | 12 | ITPRIP/TRAF2/TNFAIP3/THBS1/RIPK1/BMPRI1B/STK3/TRPS1/SP100/ARHGEF2/BCL2L1/FADD                                                                            |
| Biological Process | GO:0021782 | glial cell development                                                         | 21/2279 | 122/18866 | 0.0592132 | 0.3884654 | 0.3514972 | 21 | ARHGEF10/S100A8/SH3TC2/CD9/GSN/SKI/LGI4/NDRG1/TNF/FPR2/EIF2B5/DLL1/APP/ILK/CLU/NF1/GRN/TSPAN2/FA2H/CNTNAP1/ERCC2                                         |

|                    |            |                                                                        |         |           |           |           |           |    |                                                                                                                                                                                                                                                                |
|--------------------|------------|------------------------------------------------------------------------|---------|-----------|-----------|-----------|-----------|----|----------------------------------------------------------------------------------------------------------------------------------------------------------------------------------------------------------------------------------------------------------------|
| Biological Process | GO:0072593 | reactive oxygen species metabolic process                              | 44/2279 | 288/18866 | 0.0596819 | 0.3884654 | 0.3514972 | 44 | HDAC4/MPO/IL10/CD177/NCF4/SMAD3/LPO/DNM2/MIR199A1/TNF/SFTPD/FPR2/SH3PXD2B/TGFBR2/THBS1/RAB27A/RIPK1/GNAI2/NOS1AP/MIR24-2/PREX1/CLU/NCF2/PAX2/SPHK2/TGFB1/HBB/RIPK3/POR/HK2/PDGFB/BCR/CAT/NFE2L2/ITGB2/BCL2/MIR199A2/FOXO1/AGTR1/PDGFRB/FOXO1/CX3CR1/SIRT3/PRKN |
| Biological Process | GO:0001504 | neurotransmitter uptake                                                | 9/2279  | 42/18866  | 0.0600498 | 0.3884654 | 0.3514972 | 9  | SLC1A2/ITGB3/SLC1A6/PER2/SYNGR3/SLC1A3/SLC29A1/FLOT1/PRKN                                                                                                                                                                                                      |
| Biological Process | GO:1904037 | positive regulation of epithelial cell apoptotic process               | 9/2279  | 42/18866  | 0.0600498 | 0.3884654 | 0.3514972 | 9  | GSN/MIR101-2/THBS1/MIR24-2/PRKI/ARRB2/SORT1/ANO6/PLCG1                                                                                                                                                                                                         |
| Biological Process | GO:0002407 | dendritic cell chemotaxis                                              | 6/2279  | 24/18866  | 0.0611964 | 0.3884654 | 0.3514972 | 6  | TRPM2/CALR/CCR2/CCL5/CXCR1/ANO6                                                                                                                                                                                                                                |
| Biological Process | GO:0002719 | negative regulation of cytokine production involved in immune response | 6/2279  | 24/18866  | 0.0611964 | 0.3884654 | 0.3514972 | 6  | IL10/TNF/HLA-F/SMAD7/TGFB1/CD96                                                                                                                                                                                                                                |
| Biological Process | GO:0034035 | purine ribonucleoside bisphosphate metabolic process                   | 6/2279  | 24/18866  | 0.0611964 | 0.3884654 | 0.3514972 | 6  | SULT6B1/ABHD14B/SULT1A2/SLC26A1/PAPSS2/TPST1                                                                                                                                                                                                                   |
| Biological Process | GO:0034629 | cellular protein-containing complex localization                       | 6/2279  | 24/18866  | 0.0611964 | 0.3884654 | 0.3514972 | 6  | NACC2/SMAD7/WASL/KLHL21/CEP72/EZR                                                                                                                                                                                                                              |
| Biological Process | GO:0034695 | response to prostaglandin E                                            | 6/2279  | 24/18866  | 0.0611964 | 0.3884654 | 0.3514972 | 6  | PPARG/P2RY6/GNG2/ACACA/PRKCE/PRKAA1                                                                                                                                                                                                                            |
| Biological Process | GO:0048745 | smooth muscle tissue development                                       | 6/2279  | 24/18866  | 0.0611964 | 0.3884654 | 0.3514972 | 6  | MIR143/MIR145/MYLK/NF1/ENG/PDGFRB                                                                                                                                                                                                                              |

|                    |            |                                                         |         |           |           |           |           |    |                                                                                                                                                                                                                                                                 |
|--------------------|------------|---------------------------------------------------------|---------|-----------|-----------|-----------|-----------|----|-----------------------------------------------------------------------------------------------------------------------------------------------------------------------------------------------------------------------------------------------------------------|
| Biological Process | GO:0050427 | 3'-phosphoadenosine 5'-phosphosulfate metabolic process | 6/2279  | 24/18866  | 0.0611964 | 0.3884654 | 0.3514972 | 6  | SULT6B1/ABHD14B/SULT1A2/SLC26A1/PAPSS2/TPST1                                                                                                                                                                                                                    |
| Biological Process | GO:0090208 | positive regulation of triglyceride metabolic process   | 6/2279  | 24/18866  | 0.0611964 | 0.3884654 | 0.3514972 | 6  | PNPLA2/MFSD2A/GLPLD1/NR1H2/ABHD5/SREBF1                                                                                                                                                                                                                         |
| Biological Process | GO:0097186 | amelogenesis                                            | 6/2279  | 24/18866  | 0.0611964 | 0.3884654 | 0.3514972 | 6  | CSF3R/SLC24A4/PERP/FOXO1/FAM20C/NECTIN1                                                                                                                                                                                                                         |
| Biological Process | GO:2000209 | regulation of anoikis                                   | 6/2279  | 24/18866  | 0.0611964 | 0.3884654 | 0.3514972 | 6  | CEACAM6/TLE1/BCL2/NOTCH1/CHEK2/CEACAM5                                                                                                                                                                                                                          |
| Biological Process | GO:0031647 | regulation of protein stability                         | 45/2279 | 296/18866 | 0.0613516 | 0.3884654 | 0.3514972 | 45 | TRIM39/CALR/GSN/CREB1/CCDC88C/AAK1/PIK3R1/SMAD3/FBXO7/MIR101-2/RTN4/USP3/CUL3/TESC/CTSH/USP36/CLU/SMAD7/ASGR2/PHB/PFN1/HTT/ATF7IP/STK3/GRN/CREBBP/CCNH/MORC3/BCL2/ZBED3/CHEK2/NAA16/USP2/WDR81/ANK2/ASPH/SREBF1/FBXW11/FLOT1/BAG5/CCT6A/PRKN/P3H1/MARCHF7/PLPP3 |
| Biological Process | GO:0002244 | hematopoietic progenitor cell differentiation           | 28/2279 | 172/18866 | 0.061357  | 0.3884654 | 0.3514972 | 28 | CEBPD/KCNAB2/MYB/RUNX1/CSF1R/RBM47/ACP6/TMEM91/DHTKD1/PTPN6/TCF12/FLT1/TGFB1/JAM3/PTPRC/SETD1A/PSMF1/NFE2L2/PUS7/BCL2/TCF3/PSMB7/NOTCH1/SSBP3/INHBA/ERCC2/PSMD13/AGPAT5                                                                                         |
| Biological Process | GO:0016239 | positive regulation of macroautophagy                   | 13/2279 | 68/18866  | 0.0615082 | 0.3884654 | 0.3514972 | 13 | SPTLC2/ULK1/VPS13D/LARP1/PIP4K2A/UVRAG/SMURF1/RUFY4/CLEC16A/HTT/TSC2/STING1/PRKN                                                                                                                                                                                |
| Biological Process | GO:0040014 | regulation of multicellular organism growth             | 13/2279 | 68/18866  | 0.0615082 | 0.3884654 | 0.3514972 | 13 | CREB1/MFSD2A/SH3PXD2B/STAT5A/APP/GHRL/FTO/BCL2/RAI1/NPPC/MBD5/EZR/SPTBN4                                                                                                                                                                                        |
| Biological Process | GO:0072665 | protein localization to vacuole                         | 13/2279 | 68/18866  | 0.0615082 | 0.3884654 | 0.3514972 | 13 | SORL1/VTI1A/VPS13D/TNFAIP3/RTN4/CLU/SMURF1/SH3BP4/NUMA1/SORT1/NEDD4/AP3D1/NCOA4                                                                                                                                                                                 |



|                    |            |                                                                           |        |          |           |           |           |   |                                                   |
|--------------------|------------|---------------------------------------------------------------------------|--------|----------|-----------|-----------|-----------|---|---------------------------------------------------|
| Biological Process | GO:0003230 | cardiac atrium development                                                | 8/2279 | 36/18866 | 0.0616473 | 0.3884654 | 0.3514972 | 8 | ZFPM1/GJA5/CCM2L/WNT11/ENG/NOTCH1/ANK2/NSD2       |
| Biological Process | GO:0006007 | glucose catabolic process                                                 | 8/2279 | 36/18866 | 0.0616473 | 0.3884654 | 0.3514972 | 8 | FOXK1/ENO1/HK1/ADPGK/PGAM1/ENO3/HK2/PKM           |
| Biological Process | GO:0014808 | release of sequestered calcium ion into cytosol by sarcoplasmic reticulum | 8/2279 | 36/18866 | 0.0616473 | 0.3884654 | 0.3514972 | 8 | PDE4D/CASQ2/CACNA1C/SLC8A1/NOL3/GSTO1/ANK2/CASQ1  |
| Biological Process | GO:0031572 | G2 DNA damage checkpoint                                                  | 8/2279 | 36/18866 | 0.0616473 | 0.3884654 | 0.3514972 | 8 | TRIM39/BLM/FZR1/FOXN3/TAOK3/CLSPN/ABRAXAS1/BABAM2 |
| Biological Process | GO:0043368 | positive T cell selection                                                 | 8/2279 | 36/18866 | 0.0616473 | 0.3884654 | 0.3514972 | 8 | ZFPM1/ITPKB/LOXL3/LY9/PTPRC/BCL2/CYLD/DOCK2       |
| Biological Process | GO:0050931 | pigment cell differentiation                                              | 8/2279 | 36/18866 | 0.0616473 | 0.3884654 | 0.3514972 | 8 | ZEB2/RAB27A/MYO5A/GNA11/BCL2/MEF2C/HPS6/AP3D1     |
| Biological Process | GO:0071634 | regulation of transforming growth factor beta production                  | 8/2279 | 36/18866 | 0.0616473 | 0.3884654 | 0.3514972 | 8 | LTBP1/CREB1/MYB/SMAD3/THBS1/WNT11/CDH3/ITGB6      |
| Biological Process | GO:2000516 | positive regulation of CD4-positive, alpha-beta T cell activation         | 8/2279 | 36/18866 | 0.0616473 | 0.3884654 | 0.3514972 | 8 | PRKCZ/MYB/CD55/NLRP3/TGFBR2/ZBTB7B/RARA/HLX       |
| Biological Process | GO:0002138 | retinoic acid biosynthetic process                                        | 3/2279 | 8/18866  | 0.0617747 | 0.3884654 | 0.3514972 | 3 | DHRS9/RDH10/ALDH1A2                               |

|                    |            |                                                                     |        |         |           |           |           |   |                      |
|--------------------|------------|---------------------------------------------------------------------|--------|---------|-----------|-----------|-----------|---|----------------------|
| Biological Process | GO:0003062 | regulation of heart rate by chemical signal                         | 3/2279 | 8/18866 | 0.0617747 | 0.3884654 | 0.3514972 | 3 | PDE4D/NOS1AP/SREBF1  |
| Biological Process | GO:0003433 | chondrocyte development involved in endochondral bone morphogenesis | 3/2279 | 8/18866 | 0.0617747 | 0.3884654 | 0.3514972 | 3 | TGFB2/POC1A/RARG     |
| Biological Process | GO:0006477 | protein sulfation                                                   | 3/2279 | 8/18866 | 0.0617747 | 0.3884654 | 0.3514972 | 3 | HS3ST3B1/NDST1/TPST1 |
| Biological Process | GO:0007172 | signal complex assembly                                             | 3/2279 | 8/18866 | 0.0617747 | 0.3884654 | 0.3514972 | 3 | NCK2/PXN/MAPK8IP2    |
| Biological Process | GO:0030853 | negative regulation of granulocyte differentiation                  | 3/2279 | 8/18866 | 0.0617747 | 0.3884654 | 0.3514972 | 3 | INPP5D/RARA/TRIB1    |
| Biological Process | GO:0030854 | positive regulation of granulocyte differentiation                  | 3/2279 | 8/18866 | 0.0617747 | 0.3884654 | 0.3514972 | 3 | RUNX1/TESC/TRIB1     |
| Biological Process | GO:0032287 | peripheral nervous system myelin maintenance                        | 3/2279 | 8/18866 | 0.0617747 | 0.3884654 | 0.3514972 | 3 | SH3TC2/NDRG1/FA2H    |
| Biological Process | GO:0032906 | transforming growth factor beta2 production                         | 3/2279 | 8/18866 | 0.0617747 | 0.3884654 | 0.3514972 | 3 | SMAD3/WNT11/CDH3     |
| Biological Process | GO:0032909 | regulation of transforming growth factor beta2 production           | 3/2279 | 8/18866 | 0.0617747 | 0.3884654 | 0.3514972 | 3 | SMAD3/WNT11/CDH3     |

|                    |            |                                                                |        |         |           |           |           |   |                      |
|--------------------|------------|----------------------------------------------------------------|--------|---------|-----------|-----------|-----------|---|----------------------|
| Biological Process | GO:0034091 | regulation of maintenance of sister chromatid cohesion         | 3/2279 | 8/18866 | 0.0617747 | 0.3884654 | 0.3514972 | 3 | TNKS/NSMCE2/SLF1     |
| Biological Process | GO:0034182 | regulation of maintenance of mitotic sister chromatid cohesion | 3/2279 | 8/18866 | 0.0617747 | 0.3884654 | 0.3514972 | 3 | TNKS/NSMCE2/SLF1     |
| Biological Process | GO:0035425 | autocrine signaling                                            | 3/2279 | 8/18866 | 0.0617747 | 0.3884654 | 0.3514972 | 3 | S100A8/CD68/CX3CR1   |
| Biological Process | GO:0035655 | interleukin-18-mediated signaling pathway                      | 3/2279 | 8/18866 | 0.0617747 | 0.3884654 | 0.3514972 | 3 | PDGFB/IL18RAP/IL18R1 |
| Biological Process | GO:0035733 | hepatic stellate cell activation                               | 3/2279 | 8/18866 | 0.0617747 | 0.3884654 | 0.3514972 | 3 | RPS6KA1/MYB/PDGFRB   |
| Biological Process | GO:0035744 | T-helper 1 cell cytokine production                            | 3/2279 | 8/18866 | 0.0617747 | 0.3884654 | 0.3514972 | 3 | IL1R1/IL18RAP/IL18R1 |
| Biological Process | GO:0036289 | peptidyl-serine autophosphorylation                            | 3/2279 | 8/18866 | 0.0617747 | 0.3884654 | 0.3514972 | 3 | MARK3/ERN1/RIPK1     |
| Biological Process | GO:0038203 | TORC2 signaling                                                | 3/2279 | 8/18866 | 0.0617747 | 0.3884654 | 0.3514972 | 3 | PRR5L/SIK3/PRR5      |
| Biological Process | GO:0046476 | glycosylceramide biosynthetic process                          | 3/2279 | 8/18866 | 0.0617747 | 0.3884654 | 0.3514972 | 3 | B4GALT3/FA2H/PRKAA1  |

|                    |            |                                                                     |        |         |           |           |           |   |                      |
|--------------------|------------|---------------------------------------------------------------------|--------|---------|-----------|-----------|-----------|---|----------------------|
| Biological Process | GO:0048840 | otolith development                                                 | 3/2279 | 8/18866 | 0.0617747 | 0.3884654 | 0.3514972 | 3 | SLC44A4/LRIG1/TTC39C |
| Biological Process | GO:0050932 | regulation of pigment cell differentiation                          | 3/2279 | 8/18866 | 0.0617747 | 0.3884654 | 0.3514972 | 3 | ZEB2/GNA11/BCL2      |
| Biological Process | GO:0062043 | positive regulation of cardiac epithelial to mesenchymal transition | 3/2279 | 8/18866 | 0.0617747 | 0.3884654 | 0.3514972 | 3 | TGFBR2/ENG/NOTCH1    |
| Biological Process | GO:0070943 | neutrophil-mediated killing of symbiont cell                        | 3/2279 | 8/18866 | 0.0617747 | 0.3884654 | 0.3514972 | 3 | AZU1/ELANE/CTSG      |
| Biological Process | GO:0071351 | cellular response to interleukin-18                                 | 3/2279 | 8/18866 | 0.0617747 | 0.3884654 | 0.3514972 | 3 | PDGFB/IL18RAP/IL18R1 |
| Biological Process | GO:0072396 | response to cell cycle checkpoint signaling                         | 3/2279 | 8/18866 | 0.0617747 | 0.3884654 | 0.3514972 | 3 | EME1/SLX4/FBH1       |
| Biological Process | GO:0072402 | response to DNA integrity checkpoint signaling                      | 3/2279 | 8/18866 | 0.0617747 | 0.3884654 | 0.3514972 | 3 | EME1/SLX4/FBH1       |
| Biological Process | GO:0072423 | response to DNA damage checkpoint signaling                         | 3/2279 | 8/18866 | 0.0617747 | 0.3884654 | 0.3514972 | 3 | EME1/SLX4/FBH1       |
| Biological Process | GO:0097692 | histone H3-K4 monomethylation                                       | 3/2279 | 8/18866 | 0.0617747 | 0.3884654 | 0.3514972 | 3 | KMT2D/SETD1B/SETD1A  |

|                    |            |                                                                          |        |         |           |           |           |   |                       |
|--------------------|------------|--------------------------------------------------------------------------|--------|---------|-----------|-----------|-----------|---|-----------------------|
| Biological Process | GO:0099004 | calmodulin dependent kinase signaling pathway                            | 3/2279 | 8/18866 | 0.0617747 | 0.3884654 | 0.3514972 | 3 | CAMKK2/HTT/PRKAA1     |
| Biological Process | GO:0099541 | trans-synaptic signaling by lipid                                        | 3/2279 | 8/18866 | 0.0617747 | 0.3884654 | 0.3514972 | 3 | NRXN1/PLCB1/F2R       |
| Biological Process | GO:0099542 | trans-synaptic signaling by endocannabinoid                              | 3/2279 | 8/18866 | 0.0617747 | 0.3884654 | 0.3514972 | 3 | NRXN1/PLCB1/F2R       |
| Biological Process | GO:1900125 | regulation of hyaluronan biosynthetic process                            | 3/2279 | 8/18866 | 0.0617747 | 0.3884654 | 0.3514972 | 3 | AP2A1/TGFB1/PDGFB     |
| Biological Process | GO:1901339 | regulation of store-operated calcium channel activity                    | 3/2279 | 8/18866 | 0.0617747 | 0.3884654 | 0.3514972 | 3 | CASQ1/STIMATE/CRACR2A |
| Biological Process | GO:1901523 | icosanoid catabolic process                                              | 3/2279 | 8/18866 | 0.0617747 | 0.3884654 | 0.3514972 | 3 | ABHD16A/CYP4F3/LYPLA2 |
| Biological Process | GO:1901724 | positive regulation of cell proliferation involved in kidney development | 3/2279 | 8/18866 | 0.0617747 | 0.3884654 | 0.3514972 | 3 | PDGFD/IL6R/PDGFB      |
| Biological Process | GO:1902455 | negative regulation of stem cell population maintenance                  | 3/2279 | 8/18866 | 0.0617747 | 0.3884654 | 0.3514972 | 3 | MIR145/PAX2/ZNF706    |
| Biological Process | GO:1902965 | regulation of protein localization to early endosome                     | 3/2279 | 8/18866 | 0.0617747 | 0.3884654 | 0.3514972 | 3 | SORL1/MGAT3/EZR       |

|                    |            |                                                               |         |           |           |           |           |    |                                                                                                                                                                                                                                         |
|--------------------|------------|---------------------------------------------------------------|---------|-----------|-----------|-----------|-----------|----|-----------------------------------------------------------------------------------------------------------------------------------------------------------------------------------------------------------------------------------------|
| Biological Process | GO:1902966 | positive regulation of protein localization to early endosome | 3/2279  | 8/18866   | 0.0617747 | 0.3884654 | 0.3514972 | 3  | SORL1/MGAT3/EZR                                                                                                                                                                                                                         |
| Biological Process | GO:1903564 | regulation of protein localization to cilium                  | 3/2279  | 8/18866   | 0.0617747 | 0.3884654 | 0.3514972 | 3  | CCDC66/LZTFL1/INPP5E                                                                                                                                                                                                                    |
| Biological Process | GO:1903719 | regulation of I-kappaB phosphorylation                        | 3/2279  | 8/18866   | 0.0617747 | 0.3884654 | 0.3514972 | 3  | TNF/TRAF2/CX3CR1                                                                                                                                                                                                                        |
| Biological Process | GO:1904238 | pericyte cell differentiation                                 | 3/2279  | 8/18866   | 0.0617747 | 0.3884654 | 0.3514972 | 3  | PDGFB/NOTCH1/GPR4                                                                                                                                                                                                                       |
| Biological Process | GO:2000074 | regulation of type B pancreatic cell development              | 3/2279  | 8/18866   | 0.0617747 | 0.3884654 | 0.3514972 | 3  | RHEB/RFX3/ARNTL                                                                                                                                                                                                                         |
| Biological Process | GO:2000322 | regulation of glucocorticoid receptor signaling pathway       | 3/2279  | 8/18866   | 0.0617747 | 0.3884654 | 0.3514972 | 3  | PHB/ARNTL/PER1                                                                                                                                                                                                                          |
| Biological Process | GO:0010001 | glial cell differentiation                                    | 36/2279 | 230/18866 | 0.0618764 | 0.3884654 | 0.3514972 | 36 | ARHGEF10/S100A8/SH3TC2/CD9/PPARG/GSN/SKI/LGI4/TNFRSF1B/CRB1/NDRG1/RHEB/TNF/FPR2/EIF2B5/BIN1/DLL1/APP/ILK/CLU/TNFRSF21/HDAC1/PAX2/TGFB1/NF1/CSK/GRN/WDR1/TTC21B/NOTCH1/TSPAN2/FA2H/CNTNAP1/RELA/ERCC2/LIF                                |
| Biological Process | GO:0098657 | import into cell                                              | 36/2279 | 230/18866 | 0.0618764 | 0.3884654 | 0.3514972 | 36 | TRPM2/KCNJ15/SLC2A5/ACSL1/FXYD2/SLC1A5/SLC8A1/DNM2/SLC11A2/THBS1/SLC43A2/SLC19A1/SLC1A2/SLC7A5/NUMB/ITGB3/SLC1A6/GSG1L/DNM1/PER2/SYNGR3/SLC1A3/DNM3/EP515/LTF/SLC43A1/SLC2A1/SLC7A8/MX1/SLC29A1/TRPV2/SLC12A1/FLOT1/SLC7A1/SLC12A7/PRKN |
| Biological Process | GO:0006684 | sphingomyelin metabolic process                               | 4/2279  | 13/18866  | 0.0620427 | 0.3884654 | 0.3514972 | 4  | SPTLC2/SMPDL3B/SGMS1/SGMS2                                                                                                                                                                                                              |

|                    |            |                                                                       |        |          |           |           |           |   |                                |
|--------------------|------------|-----------------------------------------------------------------------|--------|----------|-----------|-----------|-----------|---|--------------------------------|
| Biological Process | GO:0007171 | activation of transmembrane receptor protein tyrosine kinase activity | 4/2279 | 13/18866 | 0.0620427 | 0.3884654 | 0.3514972 | 4 | PILRB/ANGPT1/DGKQ/PDGFC        |
| Biological Process | GO:0015801 | aromatic amino acid transport                                         | 4/2279 | 13/18866 | 0.0620427 | 0.3884654 | 0.3514972 | 4 | SLC15A4/SLC7A5/SLC7A8/SLC7A1   |
| Biological Process | GO:0031223 | auditory behavior                                                     | 4/2279 | 13/18866 | 0.0620427 | 0.3884654 | 0.3514972 | 4 | NRXN1/HTT/NRXN2/SLC1A3         |
| Biological Process | GO:0032530 | regulation of microvillus organization                                | 4/2279 | 13/18866 | 0.0620427 | 0.3884654 | 0.3514972 | 4 | PLD1/ATP8B1/CDHR2/EZR          |
| Biological Process | GO:0035563 | positive regulation of chromatin binding                              | 4/2279 | 13/18866 | 0.0620427 | 0.3884654 | 0.3514972 | 4 | HMBOX1/CTBP2/MED25/PARP9       |
| Biological Process | GO:0042308 | negative regulation of protein import into nucleus                    | 4/2279 | 13/18866 | 0.0620427 | 0.3884654 | 0.3514972 | 4 | ANGPT1/SUFU/NF1/CABP1          |
| Biological Process | GO:0051764 | actin crosslink formation                                             | 4/2279 | 13/18866 | 0.0620427 | 0.3884654 | 0.3514972 | 4 | BAIAP2L1/BAIAP2/ACTN1/BAIAP2L2 |
| Biological Process | GO:0060312 | regulation of blood vessel remodeling                                 | 4/2279 | 13/18866 | 0.0620427 | 0.3884654 | 0.3514972 | 4 | ABR/MIR143/TGFB1/BCR           |
| Biological Process | GO:0060456 | positive regulation of digestive system process                       | 4/2279 | 13/18866 | 0.0620427 | 0.3884654 | 0.3514972 | 4 | AQP1/NR1H2/GHRL/SLC22A5        |

|                    |            |                                                         |         |          |           |           |           |    |                                                                       |
|--------------------|------------|---------------------------------------------------------|---------|----------|-----------|-----------|-----------|----|-----------------------------------------------------------------------|
| Biological Process | GO:0071415 | cellular response to purine-containing compound         | 4/2279  | 13/18866 | 0.0620427 | 0.3884654 | 0.3514972 | 4  | TRPM2/CASQ2/SLC8A1/P2RY6                                              |
| Biological Process | GO:0090677 | reversible differentiation                              | 4/2279  | 13/18866 | 0.0620427 | 0.3884654 | 0.3514972 | 4  | MIR140/MIR145/PDGFBD/DNMT1                                            |
| Biological Process | GO:0098712 | L-glutamate import across plasma membrane               | 4/2279  | 13/18866 | 0.0620427 | 0.3884654 | 0.3514972 | 4  | SLC1A2/SLC1A6/PER2/SLC1A3                                             |
| Biological Process | GO:1902916 | positive regulation of protein polyubiquitination       | 4/2279  | 13/18866 | 0.0620427 | 0.3884654 | 0.3514972 | 4  | NOD2/RNF40/PRKN/MARCH7                                                |
| Biological Process | GO:1903236 | regulation of leukocyte tethering or rolling            | 4/2279  | 13/18866 | 0.0620427 | 0.3884654 | 0.3514972 | 4  | ELANE/FUT4/FUT7/CCR2                                                  |
| Biological Process | GO:1904590 | negative regulation of protein import                   | 4/2279  | 13/18866 | 0.0620427 | 0.3884654 | 0.3514972 | 4  | ANGPT1/SUFU/NF1/CABP1                                                 |
| Biological Process | GO:0001954 | positive regulation of cell-matrix adhesion             | 11/2279 | 55/18866 | 0.0620495 | 0.3884654 | 0.3514972 | 11 | PRKCZ/RIN2/ITGB1BP1/CEACAM6/SMAD3/JUP/DISC1/NINJ1/ILK/PTPRJ/PLEKHA2   |
| Biological Process | GO:0032720 | negative regulation of tumor necrosis factor production | 11/2279 | 55/18866 | 0.0620495 | 0.3884654 | 0.3514972 | 11 | TRIM27/IL10/MIR140/TNFAIP3/CSAR2/PTPN6/RARA/ARRB2/CD33/VSIR/ILRUN     |
| Biological Process | GO:0045620 | negative regulation of lymphocyte differentiation       | 11/2279 | 55/18866 | 0.0620495 | 0.3884654 | 0.3514972 | 11 | RUNX1/LOXL3/FBXO7/SMAD7/ZBTB7B/ZC3H8/PGLYRP1/HLX/RUNX3/INHBA/TMEM131L |



|                    |            |                                                                                       |         |          |           |           |           |    |                                                               |
|--------------------|------------|---------------------------------------------------------------------------------------|---------|----------|-----------|-----------|-----------|----|---------------------------------------------------------------|
| Biological Process | GO:0071825 | protein-lipid complex subunit organization                                            | 11/2279 | 55/18866 | 0.0620495 | 0.3884654 | 0.3514972 | 11 | P4HB/MPO/MFSD2A/LIPC/PLAGL2/ABCG1/PLTP/BIN1/NR1H2/ABCA1/AGTR1 |
| Biological Process | GO:0000132 | establishment of mitotic spindle orientation                                          | 7/2279  | 30/18866 | 0.0622706 | 0.3884654 | 0.3514972 | 7  | DCTN1/NDE1/HTT/NUMA1/ARHGEF2/FBXW11/NDEL1                     |
| Biological Process | GO:0001844 | protein insertion into mitochondrial membrane involved in apoptotic signaling pathway | 7/2279  | 30/18866 | 0.0622706 | 0.3884654 | 0.3514972 | 7  | TFDP1/YWHAH/BMF/YWHAZ/BCL2/TP53BP2/YWHAQ                      |
| Biological Process | GO:0034110 | regulation of homotypic cell-cell adhesion                                            | 7/2279  | 30/18866 | 0.0622706 | 0.3884654 | 0.3514972 | 7  | CD9/PRKCA/UBASH3B/CCL5/CCM2L/JAK1/BLK                         |
| Biological Process | GO:0035066 | positive regulation of histone acetylation                                            | 7/2279  | 30/18866 | 0.0622706 | 0.3884654 | 0.3514972 | 7  | ARRB1/RPS6KA4/SPHK2/PIH1D1/KAT7/LIF/PAXIP1                    |
| Biological Process | GO:0048147 | negative regulation of fibroblast proliferation                                       | 7/2279  | 30/18866 | 0.0622706 | 0.3884654 | 0.3514972 | 7  | PPARG/SKI/B4GALT7/NF1/MORC3/MED25/PARP10                      |
| Biological Process | GO:0051491 | positive regulation of filopodium assembly                                            | 7/2279  | 30/18866 | 0.0622706 | 0.3884654 | 0.3514972 | 7  | ZMYND8/ARAP1/WASL/ESPN/PALM/RALA/DNM3                         |
| Biological Process | GO:0099625 | ventricular cardiac muscle cell membrane repolarization                               | 7/2279  | 30/18866 | 0.0622706 | 0.3884654 | 0.3514972 | 7  | KCNE1/GJA5/NOS1AP/WDR1/SNTA1/KCNQ1/ANK2                       |
| Biological Process | GO:1904837 | beta-catenin-TCF complex assembly                                                     | 7/2279  | 30/18866 | 0.0622706 | 0.3884654 | 0.3514972 | 7  | ASH2L/TCF7L2/HDAC1/TLE1/KMT2D/CREBBP/RUVBL1                   |

|                    |            |                                                                  |         |           |           |           |           |    |                                                                                                                                                          |
|--------------------|------------|------------------------------------------------------------------|---------|-----------|-----------|-----------|-----------|----|----------------------------------------------------------------------------------------------------------------------------------------------------------|
| Biological Process | GO:1905144 | response to acetylcholine                                        | 7/2279  | 30/18866  | 0.0622706 | 0.3884654 | 0.3514972 | 7  | LY6G6D/GNAI2/GNA11/CHRM2/PLCB1/RGS10/GRK2                                                                                                                |
| Biological Process | GO:1905145 | cellular response to acetylcholine                               | 7/2279  | 30/18866  | 0.0622706 | 0.3884654 | 0.3514972 | 7  | LY6G6D/GNAI2/GNA11/CHRM2/PLCB1/RGS10/GRK2                                                                                                                |
| Biological Process | GO:0051224 | negative regulation of protein transport                         | 25/2279 | 151/18866 | 0.0628248 | 0.391409  | 0.3541608 | 25 | KCNE1/WWP2/ANGPT1/ITGB1BP1/RAB11FIP1/FRMD4A/MIR199A1/SUFU/RHBDF2/UBAC2/SNX3/DERL2/ENY2/NF1/GHRL/CSK/KLF7/MIR199A2/CABP1/SP100/F2R/SREBF1/ADTRP/SVIP/PRKN |
| Biological Process | GO:0061041 | regulation of wound healing                                      | 25/2279 | 151/18866 | 0.0628248 | 0.391409  | 0.3541608 | 25 | RREB1/PLAU/CD9/KANK1/MYLK/SMAD3/PRKCA/TNF/UBASH3B/TNFAIP3/SERPINB2/THBS1/MYH9/F12/BLK/ACTG1/PDGFB/NFE2L2/PRKCE/CPB2/F2R/ANO6/ADTRP/PLPP3/CCN4            |
| Biological Process | GO:0061008 | hepaticobiliary system development                               | 24/2279 | 144/18866 | 0.0631743 | 0.39329   | 0.3558627 | 24 | ARID5B/IL10/RPS6KA1/SMAD3/TNFAIP3/E2F7/CUL3/TAF10/HNF1A/RARA/NF1/SP3/PKM/NOTCH1/CPB2/HMGCL/HLX/PCK2/CEBPB/ACAT1/HMGCS1/RELA/ALDH1A2/NODAL                |
| Biological Process | GO:0014896 | muscle hypertrophy                                               | 19/2279 | 109/18866 | 0.0632095 | 0.39329   | 0.3558627 | 19 | HDAC4/CTDP1/TTN/MIR145/AKAP13/TNFRSF1B/SMAD3/PRKCA/MIR199A1/MIR24-2/MIR23A/TNFRSF1A/CAMTA2/PDE9A/MIR199A2/NOTCH1/MEF2C/FOXO1/INPP5F                      |
| Biological Process | GO:0030534 | adult behavior                                                   | 23/2279 | 137/18866 | 0.0634333 | 0.3944238 | 0.3568887 | 23 | PPP1R1B/LGI4/HIPK2/APP/SCN1A/CRHBP/NRXN1/SLC1A2/WDR47/GHRL/NRXN2/ARRB2/NPC1/SHANK2/TMOD1/NTAN1/INPP5F/SPTBN4/NPY/NTF4/PRLHR/FADD/PRKN                    |
| Biological Process | GO:0032418 | lysosome localization                                            | 14/2279 | 75/18866  | 0.0635873 | 0.394865  | 0.3572878 | 14 | LAT/DEF8/PIK3CD/GAB2/FGR/CD84/MYH9/SPHK2/FER/BLK/PLEKHM1/KIF1B/HPS6/NDEL1                                                                                |
| Biological Process | GO:0035924 | cellular response to vascular endothelial growth factor stimulus | 14/2279 | 75/18866  | 0.0635873 | 0.394865  | 0.3572878 | 14 | NRP2/ERN1/ITGB1BP1/MIR199A1/DLL1/MIR27A/MIR23A/FLT1/MIR199A2/NOTCH1/MYO1C/PDGFRB/RELA/ADGRA2                                                             |

|                    |            |                                                                |         |           |           |           |           |    |                                                                                                                                                                                                               |
|--------------------|------------|----------------------------------------------------------------|---------|-----------|-----------|-----------|-----------|----|---------------------------------------------------------------------------------------------------------------------------------------------------------------------------------------------------------------|
| Biological Process | GO:0043409 | negative regulation of MAPK cascade                            | 30/2279 | 187/18866 | 0.0636671 | 0.3951019 | 0.3575022 | 30 | SPRED2/SORL1/HIPK3/ITGB1BP1/DUSP14/ARRB1/LAX1/PTPN6/IGF1R/PHB/PTPRJ/NF1/TNIP1/PTPRC/CSK/PPP2R1A/TAOK3/MIR138-2/RGS3/PER1/DUSP3/FOXO1/FOXO1/CYLD/EZR/MECOM/LIF/NDRG2/SIRT3/PRKN                                |
| Biological Process | GO:0009612 | response to mechanical stimulus                                | 33/2279 | 209/18866 | 0.0646744 | 0.4010912 | 0.3629216 | 33 | HDAC4/MPO/CLCN6/PPARG/TTN/CHI3L1/SLC8A1/PKD1L1/JUP/TGFB2/THBS1/TNFRSF1A/WNT11/SCN1A/AQP1/NRXN1/HTT/BCL10/MEIS2/NRXN2/MAP3K14/ETS1/ENG/NTRK1/SLC1A3/TMC1/CASP1/SLC2A1/ANKRD1/RELA/XPA/FADD/PPL                 |
| Biological Process | GO:0001649 | osteoblast differentiation                                     | 36/2279 | 231/18866 | 0.0651091 | 0.4022301 | 0.363952  | 36 | HDAC4/CEBPD/MEF2D/HDAC7/LRP5L/SKI/SMAD3/SUFU/TNF/SH3PXD2B/CLEC5A/ALPL/ILK/LIMD1/WNT11/PHB/SEMA4D/NF1/WWTR1/BMP1B/TMEM64/RUNX2/IL6R/CAT/MIR138-2/NOTCH1/MEF2C/FHL2/NPPC/LTF/CEBPB/SND1/FAM20C/SYNERIP/FBL/CCN4 |
| Biological Process | GO:0099173 | postsynapse organization                                       | 28/2279 | 173/18866 | 0.0651091 | 0.4022301 | 0.363952  | 28 | NRP2/SSH1/ZMYND8/NDRG1/CTTN/COLQ/TANC1/EPHB3/BAIAP2/ZDHHC2/ACTN1/NOS1AP/IGF1R/WASL/SYNGAP1/NRXN1/GHRL/ACTG1/NRXN2/SIPA1L1/DOCK10/DNM3/DNM1L/S/HANK2/UBE3A/CUX2/DBNL/LRFN2                                     |
| Biological Process | GO:0031279 | regulation of cyclase activity                                 | 10/2279 | 49/18866  | 0.0652021 | 0.4022301 | 0.363952  | 10 | RCVRN/TIMP2/CACNA1C/CCR2/GNAI2/AKAP5/LTB4R2/NF1/PALM/GABBR2                                                                                                                                                   |
| Biological Process | GO:0097720 | calcineurin-mediated signaling                                 | 10/2279 | 49/18866  | 0.0652021 | 0.4022301 | 0.363952  | 10 | TNF/NFATC2/NFATC1/CAMTA1/RCAN1/DYRK2/FHL2/CHERP/NR5A2/STIMATE                                                                                                                                                 |
| Biological Process | GO:0010518 | positive regulation of phospholipase activity                  | 12/2279 | 62/18866  | 0.0652814 | 0.4022301 | 0.363952  | 12 | PRKCZ/CCL5/FLT1/P2RY6/FGFR1/PHB/LPAR2/S1PR4/AGTR1/PDGFRB/PLCG1/NTF4                                                                                                                                           |
| Biological Process | GO:0010803 | regulation of tumor necrosis factor-mediated signaling pathway | 12/2279 | 62/18866  | 0.0652814 | 0.4022301 | 0.363952  | 12 | TNF/TRAF2/TNFAIP3/TRAF1/TRAIP/RIPK1/MIR24-2/TNFRSF1A/CPNE1/CASP1/CYLD/PRKN                                                                                                                                    |
| Biological Process | GO:0048488 | synaptic vesicle endocytosis                                   | 12/2279 | 62/18866  | 0.0652814 | 0.4022301 | 0.363952  | 12 | SYNJ2/DENND1A/DNM2/ITSN1/STON1/DGKQ/ACTG1/SH3GL1/DNM1/DNM3/DNM1L/MX1                                                                                                                                          |

|                    |            |                                                              |         |           |           |           |           |    |                                                                                                                                                                                                                                                                                                                                                                                                |
|--------------------|------------|--------------------------------------------------------------|---------|-----------|-----------|-----------|-----------|----|------------------------------------------------------------------------------------------------------------------------------------------------------------------------------------------------------------------------------------------------------------------------------------------------------------------------------------------------------------------------------------------------|
| Biological Process | GO:0140238 | presynaptic endocytosis                                      | 12/2279 | 62/18866  | 0.0652814 | 0.4022301 | 0.363952  | 12 | SYNJ2/DENND1A/DNM2/ITSN1/STON1/DGKQ/ACTG1/SH3GL1/DNM1/DNM3/DNM1L/MX1                                                                                                                                                                                                                                                                                                                           |
| Biological Process | GO:1902475 | L-alpha-amino acid transmembrane transport                   | 12/2279 | 62/18866  | 0.0652814 | 0.4022301 | 0.363952  | 12 | SLC1A5/SLC15A4/SLC43A2/SLC1A2/SLC7A7/SLC7A5/SLC1A6/PER2/SLC1A3/SLC43A1/SLC7A8/SLC7A1                                                                                                                                                                                                                                                                                                           |
| Biological Process | GO:2001244 | positive regulation of intrinsic apoptotic signaling pathway | 12/2279 | 62/18866  | 0.0652814 | 0.4022301 | 0.363952  | 12 | S100A8/LCK/PLAGL2/BMF/NCK2/NACC2/RIPK3/FIS1/BCL2/DNM1L/BCL2L1/FBH1                                                                                                                                                                                                                                                                                                                             |
| Biological Process | GO:0007179 | transforming growth factor beta receptor signaling pathway   | 32/2279 | 202/18866 | 0.0655861 | 0.4037661 | 0.3653419 | 32 | LRG1/PRKCZ/LTBP1/SPRED2/CREB1/SKI/TGFBRAP1/SMAD3/LDLRAD4/DNM2/HIPK2/DUSP22/CHST11/TGFB2/THBS1/SMAD7/PXN/ZMIZ1/ITGB5/TGFB1/SMURF1/TGFB111/HTRA4/CREBBP/ENG/ARRB2/PRDM16/ARHGEF18/GCNT2/HTRA3/NODAL/ZFYVE9                                                                                                                                                                                       |
| Biological Process | GO:1903531 | negative regulation of secretion by cell                     | 27/2279 | 166/18866 | 0.0657684 | 0.4037661 | 0.3653419 | 27 | ABR/TNFRSF1B/RAP1B/CCR2/RAB11FIP1/FRMD4A/MIR199A1/CD84/RHBDF2/GNAI2/HLA-F/TNFRSF1A/CRHBP/ENY2/NF1/GHRL/BCR/KLF7/MIR199A2/NOTCH1/F2R/SREBF1/ADTRP/INHBA/LIF/CBARP/PRKN                                                                                                                                                                                                                          |
| Biological Process | GO:0045666 | positive regulation of neuron differentiation                | 56/2279 | 380/18866 | 0.0663852 | 0.4037661 | 0.3653419 | 56 | CPNE6/PLXNC1/TIMP2/AP2A1/CYB5D2/CSNK1D/TMEM30A/ZMYND8/CPNE5/ZEB2/ITSN1/DISC1/CUX1/BAIAP2/SNX3/TCF12/ILK/CPNE1/FGFR1/SEMA4D/RAPGEF2/SMURF1/SS18L2/RARA/CPFB3/CAMK1D/KDM4C/NCOA1/CDH4/CSNK1E/GRN/CREB3L2/PRKCI/NFE2L2/ARSB/NTRK1/BCL2/TCF3/CDKL3/DNM1L/AVIL/MEF2C/SHANK2/SYT17/ARHGEF2/GDF6/ANKRD1/MARK2/CYFIP1/TRPV2/NDEL1/CUX2/EIF4G1/DBNL/PRKN/P3H1                                           |
| Biological Process | GO:0050808 | synapse organization                                         | 63/2279 | 433/18866 | 0.0668505 | 0.4037661 | 0.3653419 | 63 | DCTN1/NRP2/SSH1/SPOCK2/IL10/ZMYND8/NDRG1/CTTN/COLQ/TNF/TANC1/EPHB3/SEMA4A/ITSN1/DISC1/BAIAP2/ZDHHC2/ACTN1/APP/NOS1AP/IGF1R/PPFIA1/WASL/SYNGAP1/SPARCL1/FARP1/SEMA4D/MYO5A/PFN1/NRXN1/KIRREL3/CTBP2/GHRL/ACTG1/PPFIBP2/NRXN2/PALM/SIPA1L1/DOCK10/YWHAZ/NTRK1/CDH1/DNM3/MYOT/DNM1L/MEF2C/SHANK2/F2R/UBE3A/SDK2/NEDD4/ARHGEF15/C1QB/CYFIP1/SLIT1/CX3CR1/CUX2/EIF4G1/SYNPO/DBNL/LRFN2/NFIA/NECTIN1 |
| Biological Process | GO:0050792 | regulation of viral process                                  | 34/2279 | 217/18866 | 0.0671686 | 0.4037661 | 0.3653419 | 34 | SLPI/TRIM27/P4HB/TRIM38/CTDP1/GSN/TRIM8/TRIM10/SRPK2/TNF/POLR2F/CCL5/CSF1R/LARP1/SNX3/HDAC1/PC/PHB/FCN1/TRIM5/TNIP1/RSF1/BCL2/NOTCH1/LTF/ILF3/MX1/NR5A2/PARP10/BANF1/ISG20/TRIM26/PRKN/SHFL                                                                                                                                                                                                    |
| Biological Process | GO:0002690 | positive regulation of leukocyte chemotaxis                  | 17/2279 | 96/18866  | 0.067217  | 0.4037661 | 0.3653419 | 17 | CALR/C3AR1/CCR2/CCL5/CSF1R/FPR2/THBS1/DEFB124/ZNF580/CAMK1D/CXCL17/IL6R/DAPK2/DNM1L/ANO6/DYSF/CCL27                                                                                                                                                                                                                                                                                            |

|                    |            |                                                         |         |           |           |           |           |    |                                                                                                                                                                                                                                                                                                        |
|--------------------|------------|---------------------------------------------------------|---------|-----------|-----------|-----------|-----------|----|--------------------------------------------------------------------------------------------------------------------------------------------------------------------------------------------------------------------------------------------------------------------------------------------------------|
| Biological Process | GO:0006898 | receptor-mediated endocytosis                           | 49/2279 | 328/18866 | 0.0676479 | 0.4037661 | 0.3653419 | 49 | SORL1/CALR/AP2A1/CD9/CLEC9A/ANGPT1/AAK1/ARRB1/CTTN/DNM2/MIR199A1/RAB31/SFTPD/FPR2/ITSN1/TGFBR2/ANKRD13B/DLL1/MASP1/COLEC12/ANKRD13D/CLU/WASL/MARCO/STAB2/HBB/NUMB/ITGB3/ANKRD13A/CXCR1/DGKD/TPCN2/GSG1L/ARRB2/ITGB2/DNM1/AP1G2/MICALL1/DNM3/MIR199A2/EPS15/NEDD4/MX1/INPP5F/EZR/FLOT1/CLTCL1/DBNL/GRK2 |
| Biological Process | GO:0042113 | B cell activation                                       | 49/2279 | 328/18866 | 0.0676479 | 0.4037661 | 0.3653419 | 49 | HDAC4/IL10/PIK3CD/INPP5D/PIK3R1/LAX1/TNFAIP3/LYL1/NFATC2/TNFSF13B/TLR9/MNDA/IGHV6-1/DLL1/RBPJ/PTPN6/TNFRSF21/UNG/TGFB1/PHB/PTPRJ/PRKCB/CD79A/BLK/SP3/CMTM7/PTPRC/CD320/DOCK10/NTRK1/NOD2/POU2F2/BCL2/TCF3/TP53BP1/MEF2C/BANK1/ERCC1/HHEX/TNFSF13/CYLD/BCL3/INHBA/PELI1/PCID2/PAXIP1/VAV3/ADGRG3/NSD2   |
| Biological Process | GO:0048662 | negative regulation of smooth muscle cell proliferation | 13/2279 | 69/18866  | 0.0677719 | 0.4037661 | 0.3653419 | 13 | IL10/PPARG/MIR140/MIR143/MIR145/TNFAIP3/COMT/ILK/SF1/MEF2C/VIPR2/TRIB1/NDRG2                                                                                                                                                                                                                           |
| Biological Process | GO:0033865 | nucleoside bisphosphate metabolic process               | 23/2279 | 138/18866 | 0.0677837 | 0.4037661 | 0.3653419 | 23 | ACSL1/FAR2/ACOT13/SULT6B1/ABHD14B/OGDH/ACOT7/ACSS1/SULT1A2/SLC26A1/ACACB/ACSS2/PPCDC/PAPSS2/ACACA/ACSF3/HMGCL/ACAT1/HMGCS1/SCD/TPST1/SLC25A1/PAN K4                                                                                                                                                    |
| Biological Process | GO:0033875 | ribonucleoside bisphosphate metabolic process           | 23/2279 | 138/18866 | 0.0677837 | 0.4037661 | 0.3653419 | 23 | ACSL1/FAR2/ACOT13/SULT6B1/ABHD14B/OGDH/ACOT7/ACSS1/SULT1A2/SLC26A1/ACACB/ACSS2/PPCDC/PAPSS2/ACACA/ACSF3/HMGCL/ACAT1/HMGCS1/SCD/TPST1/SLC25A1/PAN K4                                                                                                                                                    |
| Biological Process | GO:0034032 | purine nucleoside bisphosphate metabolic process        | 23/2279 | 138/18866 | 0.0677837 | 0.4037661 | 0.3653419 | 23 | ACSL1/FAR2/ACOT13/SULT6B1/ABHD14B/OGDH/ACOT7/ACSS1/SULT1A2/SLC26A1/ACACB/ACSS2/PPCDC/PAPSS2/ACACA/ACSF3/HMGCL/ACAT1/HMGCS1/SCD/TPST1/SLC25A1/PAN K4                                                                                                                                                    |
| Biological Process | GO:0046330 | positive regulation of JNK cascade                      | 23/2279 | 138/18866 | 0.0677837 | 0.4037661 | 0.3653419 | 23 | ERN1/ZNF622/TNF/ZEB2/TRAF2/TRAF1/HIPK2/TLR9/DUSP22/TNIK/RIPK1/APP/MTURN/AXIN1/SH3RF3/STK3/PLCB1/TAOK3/NOD2/GADD45G/ANKRD6/DBNL/MAP3K20                                                                                                                                                                 |
| Biological Process | GO:0045667 | regulation of osteoblast differentiation                | 22/2279 | 131/18866 | 0.0680706 | 0.4037661 | 0.3653419 | 22 | HDAC4/CEBPD/HDAC7/SKI/SMAD3/SUFU/TNF/ILK/LIMD1/SEMA4D/BMPR1B/TMEM64/RUNX2/IL6R/MIR138-2/NOTCH1/MEF2C/NPPC/LTF/CEBPB/FAM20C/CCN4                                                                                                                                                                        |
| Biological Process | GO:0061462 | protein localization to lysosome                        | 9/2279  | 43/18866  | 0.0681557 | 0.4037661 | 0.3653419 | 9  | SORL1/RTN4/CLU/SH3BP4/NUMA1/SORT1/NEDD4/AP3D1/NCOA4                                                                                                                                                                                                                                                    |

|                    |            |                                                          |         |           |           |           |           |    |                                                                                                                                                                                                                          |
|--------------------|------------|----------------------------------------------------------|---------|-----------|-----------|-----------|-----------|----|--------------------------------------------------------------------------------------------------------------------------------------------------------------------------------------------------------------------------|
| Biological Process | GO:0050796 | regulation of insulin secretion                          | 29/2279 | 181/18866 | 0.0682036 | 0.4037661 | 0.3653419 | 29 | NADK/ITPR2/MYRIP/CACNA1C/LRP5L/ARRB1/PRKCA/GLPD1/TNF/CCL5/ITPR1/RFX3/TCF7L2/ENY2/GIPR/BLK/GHRL/KLF7/ARNTL/PER2/SLC16A1/PRKCE/SLC2A1/SREBF1/CPT1A/RPH3A<br>L/C2CD2L/SIRT3/PRKN                                            |
| Biological Process | GO:0031929 | TOR signaling                                            | 21/2279 | 124/18866 | 0.0682383 | 0.4037661 | 0.3653419 | 21 | RPTOR/PRR5L/MIR199A1/RHEB/LARP1/DISC1/DGKQ/CLEC16A/SIK3/PRR5/SEC13/SH3BP4/ARNTL/MIR199A2/PIH1D1/GNA12/TSC2/TNFAIP8L1/TTI1/NPRL2/PRKAA1                                                                                   |
| Biological Process | GO:0051099 | positive regulation of binding                           | 28/2279 | 174/18866 | 0.0690198 | 0.4037661 | 0.3653419 | 28 | MARK3/PPARG/SKI/HMBOX1/AMFR/ARRB1/HIPK2/APP/TCF7L2/TGFB1/RAPGEF2/RARA/CSF3/CTBP2/STK3/SPTA1/PLCL1/ADD1/RB1/MED25/CDC45/CLN5/FLOT1/ERCC2/PARP9/EIF4<br>G1/STING1/PRKN                                                     |
| Biological Process | GO:0019320 | hexose catabolic process                                 | 11/2279 | 56/18866  | 0.0691587 | 0.4037661 | 0.3653419 | 11 | FUT4/FOXK1/ENO1/FUT7/HK1/ADPGK/PGAM1/GLYCTK/ENO3/HK2/PKM                                                                                                                                                                 |
| Biological Process | GO:0044273 | sulfur compound catabolic process                        | 11/2279 | 56/18866  | 0.0691587 | 0.4037661 | 0.3653419 | 11 | HEXB/GADL1/GALNS/GGT1/CBS/ACOT7/AGXT/ARSB/ADO/MAT1A/ACAT1                                                                                                                                                                |
| Biological Process | GO:0050732 | negative regulation of peptidyl-tyrosine phosphorylation | 11/2279 | 56/18866  | 0.0691587 | 0.4037661 | 0.3653419 | 11 | PRKCZ/SH3BP5L/SH3BP5/DUSP22/PTPN6/SEMA4D/LRRK1/PTPRC/PPP2R1A/GGNBP2/INPP5F                                                                                                                                               |
| Biological Process | GO:0045665 | negative regulation of neuron differentiation            | 35/2279 | 225/18866 | 0.0695873 | 0.4037661 | 0.3653419 | 35 | SEMA6B/CTS2/GFI1/CALR/KANK1/LSM1/YWHAH/BCL11A/SEMA4A/RTN4/PMP22/SEMA4B/DLL1/APP/MIB1/IFRD1/ASAP1/SYNGAP1/KREMEN1/SEMA4D/RAPGEF2/ITM2C/MEIS1/DN<br>M3/NOTCH1/ZHX2/CDKL3/UBE3A/CERS2/INPP5F/BAG5/RAP1GAP2/HES3/PRAG1/SPART |
| Biological Process | GO:0003281 | ventricular septum development                           | 14/2279 | 76/18866  | 0.0696623 | 0.4037661 | 0.3653419 | 14 | LTPB1/ZFPM1/DNM2/SUFU/GJA5/TGFBR2/RBPJ/SMAD7/WNT11/NOTCH1/SLIT3/LMO4/CPLANE1/NSD2                                                                                                                                        |
| Biological Process | GO:0060415 | muscle tissue morphogenesis                              | 14/2279 | 76/18866  | 0.0696623 | 0.4037661 | 0.3653419 | 14 | ZFPM1/RXRA/TTN/MIR143/MIR145/MYLK/CCM2L/RBPJ/SMAD7/PAX7/TGFB1/ENG/NOTCH1/ANKRD1                                                                                                                                          |

|                    |            |                                                                                 |         |           |          |           |           |    |                                                                                                                                                                                  |
|--------------------|------------|---------------------------------------------------------------------------------|---------|-----------|----------|-----------|-----------|----|----------------------------------------------------------------------------------------------------------------------------------------------------------------------------------|
| Biological Process | GO:0042129 | regulation of T cell proliferation                                              | 27/2279 | 167/18866 | 0.069797 | 0.4037661 | 0.3653419 | 27 | HLA-<br>DMB/IL27/IL10/MAD1L1/CD55/TNFRSF1B/CCR2/CCL5/NCK2/SFTPD/TNFSF13B/TGFB2/PTPN6/TNFRSF21/ZBTB7B/RIPK3/CCDC88B/PTPRC/SPTA1/PNP/CEBPB/SLC7A1/FADD/PELI1/TMEM131L/VSIR/MARCHF7 |
| Biological Process | GO:0001991 | regulation of systemic arterial blood pressure by circulatory renin-angiotensin | 5/2279  | 19/18866  | 0.070066 | 0.4037661 | 0.3653419 | 5  | CTSZ/CTSG/GJA5/F2R/AOPEP                                                                                                                                                         |
| Biological Process | GO:0006670 | sphingosine metabolic process                                                   | 5/2279  | 19/18866  | 0.070066 | 0.4037661 | 0.3653419 | 5  | SPTLC2/SPHK2/SGPP1/SGPP2/PLPP3                                                                                                                                                   |
| Biological Process | GO:0010759 | positive regulation of macrophage chemotaxis                                    | 5/2279  | 19/18866  | 0.070066 | 0.4037661 | 0.3653419 | 5  | C3AR1/CCL5/CSF1R/THBS1/CXCL17                                                                                                                                                    |
| Biological Process | GO:0032674 | regulation of interleukin-5 production                                          | 5/2279  | 19/18866  | 0.070066 | 0.4037661 | 0.3653419 | 5  | PRKCZ/PDE4D/NLRP3/TNFRSF21/RARA                                                                                                                                                  |
| Biological Process | GO:0032930 | positive regulation of superoxide anion generation                              | 5/2279  | 19/18866  | 0.070066 | 0.4037661 | 0.3653419 | 5  | CD177/FPR2/GNAI2/TGFB1/ITGB2                                                                                                                                                     |
| Biological Process | GO:0034393 | positive regulation of smooth muscle cell apoptotic process                     | 5/2279  | 19/18866  | 0.070066 | 0.4037661 | 0.3653419 | 5  | PPARG/MIR140/ARRB1/E2F3/MIR24-2                                                                                                                                                  |
| Biological Process | GO:0050908 | detection of light stimulus involved in visual perception                       | 5/2279  | 19/18866  | 0.070066 | 0.4037661 | 0.3653419 | 5  | CACNA2D4/CRB1/CCDC66/GNAT2/EYS                                                                                                                                                   |
| Biological Process | GO:0050962 | detection of light stimulus involved in sensory perception                      | 5/2279  | 19/18866  | 0.070066 | 0.4037661 | 0.3653419 | 5  | CACNA2D4/CRB1/CCDC66/GNAT2/EYS                                                                                                                                                   |

|                    |            |                                                                        |         |           |           |           |           |    |                                                                                                                                                                                                                                                                                                                                                                                                 |
|--------------------|------------|------------------------------------------------------------------------|---------|-----------|-----------|-----------|-----------|----|-------------------------------------------------------------------------------------------------------------------------------------------------------------------------------------------------------------------------------------------------------------------------------------------------------------------------------------------------------------------------------------------------|
| Biological Process | GO:2000104 | negative regulation of DNA-dependent DNA replication                   | 5/2279  | 19/18866  | 0.070066  | 0.4037661 | 0.3653419 | 5  | BLM/BRCA2/SMARCAL1/CHEK2/FBH1                                                                                                                                                                                                                                                                                                                                                                   |
| Biological Process | GO:2000251 | positive regulation of actin cytoskeleton reorganization               | 5/2279  | 19/18866  | 0.070066  | 0.4037661 | 0.3653419 | 5  | BAIAP2L1/BAIAP2/CSF3/BAIAP2L2/CCL27                                                                                                                                                                                                                                                                                                                                                             |
| Biological Process | GO:0002040 | sprouting angiogenesis                                                 | 31/2279 | 196/18866 | 0.0702066 | 0.4037661 | 0.3653419 | 31 | IL10/MAP3K3/HDAC7/ANGPT1/ITGB1BP1/MIR199A1/GLPD1/MIR101-2/E2F7/THBS1/DLL1/AKT3/MIR24-2/MIR27A/MIR23A/ESM1/MIA3/JAK1/EPN2/BMPER/GHRL/RNF213/MIR138-2/PKM/MIR199A2/NOTCH1/AGTR1/PPP1R16B/ADTRP/CEMIP2/ADGRA2                                                                                                                                                                                      |
| Biological Process | GO:0006163 | purine nucleotide metabolic process                                    | 64/2279 | 442/18866 | 0.0703551 | 0.4037661 | 0.3653419 | 64 | FOXK1/HDAC4/PDE4D/PRKAG2/RCVRN/AMPD3/ENO1/HK1/ADCY2/ACSL1/FAR2/TJP2/ADCY9/PFKFB4/ACOT13/SULT6B1/RAE1/CBFA2T3/ABHD14B/DHTKD1/APP/OGDH/NUDT3/ADPGK/ACOT7/VPS9D1/PGAM1/ACSS1/SPHK2/TGFB1/SULT1A2/SLC26A1/NUP93/ENO3/HK2/SEC13/ACACB/ACSS2/PDE9A/PNP/GUK1/ADCY4/ESRRB/MTHFD1/PPCDC/PAPSS2/PKM/ACACA/ACSF3/AK2/GMPR2/AK5/HMGCL/NPPC/ACAT1/HMGCS1/SCD/TPST1/PFKFB3/SLC25A1/PANK4/IMPDH1/PRKAA1/ATP5PD |
| Biological Process | GO:0030212 | hyaluronan metabolic process                                           | 8/2279  | 37/18866  | 0.0706838 | 0.4037661 | 0.3653419 | 8  | AP2A1/HEXB/TGFB1/STAB2/PDGFB/LYVE1/HAS3/CEMIP2                                                                                                                                                                                                                                                                                                                                                  |
| Biological Process | GO:0033363 | secretory granule organization                                         | 8/2279  | 37/18866  | 0.0706838 | 0.4037661 | 0.3653419 | 8  | ACRBP/CREB1/LYST/ZNF385A/ABCA1/F2R/DTNBP1/MFSD14A                                                                                                                                                                                                                                                                                                                                               |
| Biological Process | GO:0060260 | regulation of transcription initiation from RNA polymerase II promoter | 8/2279  | 37/18866  | 0.0706838 | 0.4037661 | 0.3653419 | 8  | CREB1/HNF1A/MED13/ATF7IP/SUB1/ERCC1/XPA/PAXIP1                                                                                                                                                                                                                                                                                                                                                  |
| Biological Process | GO:0090322 | regulation of superoxide metabolic process                             | 8/2279  | 37/18866  | 0.0706838 | 0.4037661 | 0.3653419 | 8  | CD177/TNF/FPR2/GNAI2/TGFB1/NFE2L2/ITGB2/SIRT3                                                                                                                                                                                                                                                                                                                                                   |
| Biological Process | GO:0098926 | postsynaptic signal transduction                                       | 8/2279  | 37/18866  | 0.0706838 | 0.4037661 | 0.3653419 | 8  | LY6G6D/GNAI2/GNA11/CHRM2/PLCB1/RGS10/RELA/GRK2                                                                                                                                                                                                                                                                                                                                                  |



|                    |            |                                                                          |         |           |           |           |           |    |                                                                                                                                                                                                                                                                                                                                                                                                            |
|--------------------|------------|--------------------------------------------------------------------------|---------|-----------|-----------|-----------|-----------|----|------------------------------------------------------------------------------------------------------------------------------------------------------------------------------------------------------------------------------------------------------------------------------------------------------------------------------------------------------------------------------------------------------------|
| Biological Process | GO:1903514 | release of sequestered calcium ion into cytosol by endoplasmic reticulum | 8/2279  | 37/18866  | 0.0706838 | 0.4037661 | 0.3653419 | 8  | PDE4D/CASQ2/CACNA1C/SLC8A1/NOL3/GSTO1/ANK2/CASQ1                                                                                                                                                                                                                                                                                                                                                           |
| Biological Process | GO:1904994 | regulation of leukocyte adhesion to vascular endothelial cell            | 8/2279  | 37/18866  | 0.0706838 | 0.4037661 | 0.3653419 | 8  | ELANE/FUT4/FUT7/CCR2/TNF/ETS1/ITGB2/RELA                                                                                                                                                                                                                                                                                                                                                                   |
| Biological Process | GO:0050803 | regulation of synapse structure or activity                              | 37/2279 | 240/18866 | 0.0707123 | 0.4037661 | 0.3653419 | 37 | DCTN1/NRP2/SSH1/IL10/ZMYND8/DNM2/COLQ/TNF/EPHB3/SEMA4A/ITSN1/DISC1/BAIAP2/ZDHHC2/APP/SYNGAP1/SEMA4D/NRXN1/GHRL/SIPA1L1/DNM1/YWHAZ/NTRK1/DNM3/DNM1L/MEF2C/UBE3A/NEDD4/ARHGFE15/MX1/CYFIP1/SLIT1/CUX2/EIF4G1/DBNL/LRFN2/NECTIN1                                                                                                                                                                              |
| Biological Process | GO:0048145 | regulation of fibroblast proliferation                                   | 15/2279 | 83/18866  | 0.0710637 | 0.4037661 | 0.3653419 | 15 | PPARG/CREB1/MYB/SKI/ZMIZ1/B4GALT7/AQP1/NF1/PDGFD/PDGF/BCR/MORC3/MED25/PDGFC/PDGFRB/PARP10                                                                                                                                                                                                                                                                                                                  |
| Biological Process | GO:0040013 | negative regulation of locomotion                                        | 58/2279 | 397/18866 | 0.0714455 | 0.4037661 | 0.3653419 | 58 | ELANE/SEMA6B/TACSTD2/ABR/CALR/PPARG/MIR140/KANK1/ARHGDI8/ZMYND8/ITGB1BP1/SPINT2/LDLRAD4/MIR199A1/TNF/MIR101-2/DUSP22/SEMA4A/PADI2/JUP/NAV3/THBS1/SEMA4B/CSAR2/MIR24-2/ILK/SMAD7/MIA3/WNT11/WASL/NISCH/TGFB1/PTPRJ/SEMA4D/NF1/STK24/GHRL/STK24/BCR/PLCB1/NFE2L2/ENG/VASH1/MIR138-2/CDH1/BCL2/MIR199A2/NOTCH1/CORO1C/MEF2C/DUSP3/SP100/TRIB1/ADTRP/CERS2/PTPRU/NODAL/CX3CR1                                  |
| Biological Process | GO:0031667 | response to nutrient levels                                              | 68/2279 | 473/18866 | 0.0718326 | 0.4037661 | 0.3653419 | 68 | FOXK1/RPTOR/PRKAG2/MPO/SORL1/SLC25A25/PPARG/GSN/LCN2/ACSL1/MFSD2A/TNKS/ULK1/CHSY1/VDR/SLC8A1/WIP1/LARP1/TGFBR2/COMT/ALPL/EHMT2/GNAI2/WNT11/PAX2/RARA/POR/STK24/CLEC16A/GIPR/ATG14/GHRL/ABCA1/NCOA1/ACACB/BCL10/CAT/NFE2L2/ARSB/NTRK1/SLC16A1/NOD2/FIS1/PKM/BCL2/AQP3/DNM1L/HMGCL/USF2/CD68/PCK2/SLC2A1/FOXO1/ERCC1/ACAT1/HMGCS1/SREBF1/RELA/ALDH1A2/DHODH/NPY/HSD11B2/EIF4G1/SST/NPRL2/PRKAA1/MARS1/RIPOR1 |
| Biological Process | GO:0070555 | response to interleukin-1                                                | 33/2279 | 211/18866 | 0.0718408 | 0.4037661 | 0.3653419 | 33 | HDAC4/VRK2/LCN2/TOLLIP/MAP3K3/CHI3L1/IL1R1/PRKCA/CCL5/MIR101-2/ABCC2/APP/MIR27A/RPS6KA4/IL1RN/UBE2V1/CCL20/PSMF1/PLCB1/ETS1/PRKCI/IRAK2/OTUB1/NOD2/PSMB7/CEBPB/ANKRD1/RELA/FBXW11/HNMT/CCL22/PELI1/PSMD13                                                                                                                                                                                                  |
| Biological Process | GO:0006029 | proteoglycan metabolic process                                           | 16/2279 | 90/18866  | 0.0720641 | 0.4037661 | 0.3653419 | 16 | CSGALNACT1/SPOCK2/H3S3T3B1/DSE/HEXB/CHSY1/CHST11/CHST15/NDST1/EGFLAM/TCF7L2/XYLT1/B4GALT7/BMPR1B/ARSB/PXYLP1                                                                                                                                                                                                                                                                                               |
| Biological Process | GO:0070542 | response to fatty acid                                                   | 16/2279 | 90/18866  | 0.0720641 | 0.4037661 | 0.3653419 | 16 | PPARG/ACSL1/CREB1/P2RY6/GIPR/CAT/SMARCD1/GNG2/ACACA/PRKCE/HMGCL/FOXO1/SCD/SREBF1/CPT1A/PRKAA1                                                                                                                                                                                                                                                                                                              |

|                    |            |                                                                                 |         |          |           |           |           |    |                                                                          |
|--------------------|------------|---------------------------------------------------------------------------------|---------|----------|-----------|-----------|-----------|----|--------------------------------------------------------------------------|
| Biological Process | GO:0046530 | photoreceptor cell differentiation                                              | 12/2279 | 63/18866 | 0.0721735 | 0.4037661 | 0.3653419 | 12 | MFSD2A/CRB1/GNAT2/IFT140/PRKCI/NOTCH1/RPGRIP1/CDHR1/SDK2/NRL/CABP4/NPHP4 |
| Biological Process | GO:0050650 | chondroitin sulfate proteoglycan biosynthetic process                           | 7/2279  | 31/18866 | 0.0724018 | 0.4037661 | 0.3653419 | 7  | CSGALNACT1/DSE/CHSY1/CHST11/CHST15/XYL1/PXYLP1                           |
| Biological Process | GO:0060261 | positive regulation of transcription initiation from RNA polymerase II promoter | 7/2279  | 31/18866 | 0.0724018 | 0.4037661 | 0.3653419 | 7  | CREB1/HNF1A/MED13/SUB1/ERCC1/XPA/PAXIP1                                  |
| Biological Process | GO:0070229 | negative regulation of lymphocyte apoptotic process                             | 7/2279  | 31/18866 | 0.0724018 | 0.4037661 | 0.3653419 | 7  | FOXP1/CCL5/HSH2D/PTCRA/DOCK8/BCL10/FADD                                  |
| Biological Process | GO:0098868 | bone growth                                                                     | 7/2279  | 31/18866 | 0.0724018 | 0.4037661 | 0.3653419 | 7  | ANXA6/TGFBR2/POC1A/RARA/POR/RARG/NPPC                                    |
| Biological Process | GO:0099623 | regulation of cardiac muscle cell membrane repolarization                       | 7/2279  | 31/18866 | 0.0724018 | 0.4037661 | 0.3653419 | 7  | KCNE1/GJA5/NOS1AP/WDR1/SNTA1/KCNQ1/ANK2                                  |
| Biological Process | GO:2000406 | positive regulation of T cell migration                                         | 7/2279  | 31/18866 | 0.0724018 | 0.4037661 | 0.3653419 | 7  | CCR2/CCL5/APP/DOCK8/CCL20/CCL27/FADD                                     |
| Biological Process | GO:2000515 | negative regulation of CD4-positive, alpha-beta T cell activation               | 7/2279  | 31/18866 | 0.0724018 | 0.4037661 | 0.3653419 | 7  | RUNX1/LOXL3/SMAD7/ZBTB7B/HLX/RUNX3/VSIR                                  |
| Biological Process | GO:0000423 | mitophagy                                                                       | 6/2279  | 25/18866 | 0.0726267 | 0.4037661 | 0.3653419 | 6  | VPS13D/SMURF1/CLEC16A/ATG14/TSC2/PRKN                                    |

|                    |            |                                                          |         |          |           |           |           |    |                                                                                                             |
|--------------------|------------|----------------------------------------------------------|---------|----------|-----------|-----------|-----------|----|-------------------------------------------------------------------------------------------------------------|
| Biological Process | GO:0010954 | positive regulation of protein processing                | 6/2279  | 25/18866 | 0.0726267 | 0.4037661 | 0.3653419 | 6  | NLRC4/ENO1/GSN/MYH9/F12/ANGPTL8                                                                             |
| Biological Process | GO:0015740 | C4-dicarboxylate transport                               | 6/2279  | 25/18866 | 0.0726267 | 0.4037661 | 0.3653419 | 6  | SLC1A5/LRRC8C/SLC1A2/SLC1A6/SLC1A3/SLC13A5                                                                  |
| Biological Process | GO:0043302 | positive regulation of leukocyte degranulation           | 6/2279  | 25/18866 | 0.0726267 | 0.4037661 | 0.3653419 | 6  | CD177/GAB2/FGR/HLA-F/SPHK2/ITGB2                                                                            |
| Biological Process | GO:0045662 | negative regulation of myoblast differentiation          | 6/2279  | 25/18866 | 0.0726267 | 0.4037661 | 0.3653419 | 6  | TNF/DLL1/TGFB1/ANKRD2/NOTCH1/CMTM5                                                                          |
| Biological Process | GO:0046639 | negative regulation of alpha-beta T cell differentiation | 6/2279  | 25/18866 | 0.0726267 | 0.4037661 | 0.3653419 | 6  | RUNX1/LOXL3/SMAD7/ZBTB7B/HLX/RUNX3                                                                          |
| Biological Process | GO:0046697 | decidualization                                          | 6/2279  | 25/18866 | 0.0726267 | 0.4037661 | 0.3653419 | 6  | BSG/VDR/GHRL/CTSB/TPPP3/LIF                                                                                 |
| Biological Process | GO:0060669 | embryonic placenta morphogenesis                         | 6/2279  | 25/18866 | 0.0726267 | 0.4037661 | 0.3653419 | 6  | IL10/SETD2/SPINT2/DNAJB6/GRHL2/NCOA1                                                                        |
| Biological Process | GO:1903859 | regulation of dendrite extension                         | 6/2279  | 25/18866 | 0.0726267 | 0.4037661 | 0.3653419 | 6  | CPNE6/CPNE5/BCL11A/SMURF1/SYT17/PRKN                                                                        |
| Biological Process | GO:0048704 | embryonic skeletal system morphogenesis                  | 17/2279 | 97/18866 | 0.0727336 | 0.4037661 | 0.3653419 | 17 | SETD2/SMAD3/MTHFD1L/CHST11/TGFB2/NDST1/RDH10/DSCAML1/GRHL2/RUNX2/IFT140/MTHFD1/HOXA9/ALX3/MEF2C/NODAL/HOXB7 |

|                    |            |                                                            |         |           |           |           |           |    |                                                                                                                                                                                                                                                                                                                                                                             |
|--------------------|------------|------------------------------------------------------------|---------|-----------|-----------|-----------|-----------|----|-----------------------------------------------------------------------------------------------------------------------------------------------------------------------------------------------------------------------------------------------------------------------------------------------------------------------------------------------------------------------------|
| Biological Process | GO:1901655 | cellular response to ketone                                | 17/2279 | 97/18866  | 0.0727336 | 0.4037661 | 0.3653419 | 17 | PPARG/ADCY2/ABCC2/LARP1/SMYD3/FECH/P2RY6/SPHK2/FDX1/AQP1/GNG2/ACACA/PRKCE/PCK2/FOXO1/NCOA4/PRKAA1                                                                                                                                                                                                                                                                           |
| Biological Process | GO:0019751 | polyol metabolic process                                   | 22/2279 | 132/18866 | 0.0727677 | 0.4037661 | 0.3653419 | 22 | SYNJ2/SPTLC2/INPP5A/INPP5D/ITPKB/PGP/INPP4A/NUDT3/P2RY6/SPHK2/HRH1/INPP5E/PLCB1/IMPA2/SGPP1/SGPP2/PCK2/DYSF/PLCG1/PLCD3/IP6K1/PLPP3                                                                                                                                                                                                                                         |
| Biological Process | GO:0048732 | gland development                                          | 64/2279 | 443/18866 | 0.072886  | 0.4037661 | 0.3653419 | 64 | ARID5B/RREB1/RXRA/IL10/RPS6KA1/NCOR2/MAD1L1/CREB1/BRCA2/LRP5L/VDR/SMAD3/TNF/TNFAIP3/CSF1R/LBH/EPHB3/E2F7/STAT5A/RTN4/TGFBR2/CUL3/TG/RBPJ/TAF10/HNF1A/WNT11/FGFR1/ZBTB7B/TGFB1/RARA/RIPK3/NF1/SP3/HK2/RARG/NCOA1/ETS1/CDH1/HOXA9/PKM/BCL2/NOTCH1/NOTCH4/FA2H/CPB2/HMGCL/UBE3A/USF2/HLX/PCK2/CEBPB/PDGFRB/CRIP1/ACAT1/HMGCS1/SLC29A1/ATP7B/RELA/ALDH1A2/LMO4/DHODH/NODAL/FADD |
| Biological Process | GO:0001961 | positive regulation of cytokine-mediated signaling pathway | 10/2279 | 50/18866  | 0.0730737 | 0.4037661 | 0.3653419 | 10 | GF11/IL1R1/TRAF2/RIPK1/CPNE1/NLRC5/CASP1/PARP9/FADD/PRKN                                                                                                                                                                                                                                                                                                                    |
| Biological Process | GO:0008038 | neuron recognition                                         | 10/2279 | 50/18866  | 0.0730737 | 0.4037661 | 0.3653419 | 10 | BSG/NCAM2/EPHB3/RTN4/APP/TNFRSF21/DSCAML1/YWHAZ/PCDH12/OPCML                                                                                                                                                                                                                                                                                                                |
| Biological Process | GO:0019674 | NAD metabolic process                                      | 10/2279 | 50/18866  | 0.0730737 | 0.4037661 | 0.3653419 | 10 | FOXK1/ENO1/NADK/HK1/NMNAT3/ADPGK/PGAM1/ENO3/HK2/PKM                                                                                                                                                                                                                                                                                                                         |
| Biological Process | GO:0032760 | positive regulation of tumor necrosis factor production    | 10/2279 | 50/18866  | 0.0730737 | 0.4037661 | 0.3653419 | 10 | PIK3R1/TLR9/SPON2/RIPK1/CLU/PTPRJ/PTPRC/NOD2/ARHGEF2/FADD                                                                                                                                                                                                                                                                                                                   |
| Biological Process | GO:0045540 | regulation of cholesterol biosynthetic process             | 10/2279 | 50/18866  | 0.0730737 | 0.4037661 | 0.3653419 | 10 | IDI1/MBTPS1/ABCG1/POR/ACACB/ACACA/HMGCS1/SCD/SREBF1/PRKAA1                                                                                                                                                                                                                                                                                                                  |
| Biological Process | GO:0051653 | spindle localization                                       | 10/2279 | 50/18866  | 0.0730737 | 0.4037661 | 0.3653419 | 10 | DCTN1/NDE1/DYNC1H1/MYH9/WASL/HTT/NUMA1/ARHGEF2/FBXW11/NDEL1                                                                                                                                                                                                                                                                                                                 |

|                    |            |                                                       |         |           |           |           |           |    |                                                                                                                                  |
|--------------------|------------|-------------------------------------------------------|---------|-----------|-----------|-----------|-----------|----|----------------------------------------------------------------------------------------------------------------------------------|
| Biological Process | GO:0097300 | programmed necrotic cell death                        | 10/2279 | 50/18866  | 0.0730737 | 0.4037661 | 0.3653419 | 10 | TNF/TRAF2/MIR101-2/RIPK1/RIPK3/DNM1L/ARHGEF2/CYLD/FADD/PELI1                                                                     |
| Biological Process | GO:0106118 | regulation of sterol biosynthetic process             | 10/2279 | 50/18866  | 0.0730737 | 0.4037661 | 0.3653419 | 10 | IDI1/MBTPS1/ABCG1/POR/ACACB/ACACA/HMGCS1/SCD/SREBF1/PRKAA1                                                                       |
| Biological Process | GO:1903727 | positive regulation of phospholipid metabolic process | 10/2279 | 50/18866  | 0.0730737 | 0.4037661 | 0.3653419 | 10 | FGR/FPR2/FLT1/TGFB1/VAV2/ATG14/PDGFB/NOD2/PDGFRB/VAV3                                                                            |
| Biological Process | GO:0001952 | regulation of cell-matrix adhesion                    | 21/2279 | 125/18866 | 0.0730866 | 0.4037661 | 0.3653419 | 21 | PRKCZ/PLAU/RIN2/ITGB1BP1/PIK3R1/CEACAM6/SMAD3/DUSP22/JUP/THBS1/DISC1/NINJ1/ILK/PTPRJ/NF1/ACTG1/PLEKHA2/BCL2/CORO1C/DUSP3/DAPK3   |
| Biological Process | GO:0030968 | endoplasmic reticulum unfolded protein response       | 21/2279 | 125/18866 | 0.0730866 | 0.4037661 | 0.3653419 | 21 | DCTN1/CALR/ERN1/PIK3R1/AMFR/MBTPS1/RHBDD2/NCK2/YIF1A/EDEM1/DERL2/ZBTB17/PDIA5/CLGN/COP5/CREB3L2/NFE2L2/ADD1/KLHDC3/SEC31A/ACADVL |
| Biological Process | GO:0006892 | post-Golgi vesicle-mediated transport                 | 18/2279 | 104/18866 | 0.0731288 | 0.4037661 | 0.3653419 | 18 | OSBPL5/SORL1/AP2A1/VTI1A/ANKFY1/KIF13A/DNM2/RAB31/CORO7/VAMP5/MYO5A/CSK/SORT1/AP1G2/EPS15/AP3D1/VPS35L/DOP1B                     |
| Biological Process | GO:0042303 | molting cycle                                         | 19/2279 | 111/18866 | 0.0732954 | 0.4037661 | 0.3653419 | 19 | TNF/KRT17/RBPJ/LRIG1/HDAC1/CDH3/EPS8L3/MYO5A/NF1/NUMA1/ARNTL/BCL2/PER1/NOTCH1/FA2H/TGM3/RELA/INHBA/ERCC2                         |
| Biological Process | GO:0042633 | hair cycle                                            | 19/2279 | 111/18866 | 0.0732954 | 0.4037661 | 0.3653419 | 19 | TNF/KRT17/RBPJ/LRIG1/HDAC1/CDH3/EPS8L3/MYO5A/NF1/NUMA1/ARNTL/BCL2/PER1/NOTCH1/FA2H/TGM3/RELA/INHBA/ERCC2                         |
| Biological Process | GO:1903008 | organelle disassembly                                 | 19/2279 | 111/18866 | 0.0732954 | 0.4037661 | 0.3653419 | 19 | STX5/VPS13D/CTTN/FBXO7/WIPI2/CAMKK2/USP36/SMURF1/CLEC16A/HTT/ATG14/HK2/FIS1/DNM1L/TSC2/SREBF1/MARK2/STING1/PRKN                  |

|                    |            |                                                                               |         |           |           |           |           |    |                                                                                                                                                                                                                                                                                                                                                                                                                                             |
|--------------------|------------|-------------------------------------------------------------------------------|---------|-----------|-----------|-----------|-----------|----|---------------------------------------------------------------------------------------------------------------------------------------------------------------------------------------------------------------------------------------------------------------------------------------------------------------------------------------------------------------------------------------------------------------------------------------------|
| Biological Process | GO:0034765 | regulation of ion transmembrane transport                                     | 70/2279 | 489/18866 | 0.0736862 | 0.4037661 | 0.3653419 | 70 | PDE4D/KCNI15/KCNE1/KCNAB2/THADA/CASQ2/WWP2/FXYD2/CACNA1C/YWHAH/CACNA2D4/FXYD1/CCR2/SLC8A1/DNM2/UBASH3B/GJA5/TLR9/KCNQ2/TESC/BIN1/THBS1/JSRP1/ANHAK/RIPK1/APP/NOS1AP/PTPN6/ACTN4/KCNIP1/SCN1A/P2RY6/SPHK2/KCNK6/CRHBP/SLC43A2/CNIH2/HTR3A/MYO5A/HTT/CAB39/WDR1/SNTA1/TPCN2/MAPK8IP2/KCNQ1/GSG1L/PER2/GSTO1/MEF2C/SHANK2/PRKCE/TMEM37/F2R/TMC1/SLC43A1/NEDD4/ANO6/DYSF/CACNA1B/ANK2/HECW2/PLCG1/YWHAQ/PDZK1/CASQ1/FGF14/CBARP/STIMATE/CRACR2A |
| Biological Process | GO:0045931 | positive regulation of mitotic cell cycle                                     | 27/2279 | 168/18866 | 0.0739938 | 0.4037661 | 0.3653419 | 27 | RPTOR/BRD4/TGFA/TFDP1/BRCA2/PRKCA/NSMCE2/CUL3/APP/CDC16/FGFR1/CDC25A/TMOD3/NUMA1/PDGFB/MEIS2/PLCB1/RB1/DUSP3/CDC45/ANAPC7/PDGFRB/USP2/PLRG1/EIF4G1/PCID2/SLF1                                                                                                                                                                                                                                                                               |
| Biological Process | GO:0000429 | carbon catabolite regulation of transcription from RNA polymerase II promoter | 2/2279  | 4/18866   | 0.0740726 | 0.4037661 | 0.3653419 | 2  | NCOA1/USF2                                                                                                                                                                                                                                                                                                                                                                                                                                  |
| Biological Process | GO:0000436 | carbon catabolite activation of transcription from RNA polymerase II promoter | 2/2279  | 4/18866   | 0.0740726 | 0.4037661 | 0.3653419 | 2  | NCOA1/USF2                                                                                                                                                                                                                                                                                                                                                                                                                                  |
| Biological Process | GO:0001766 | membrane raft polarization                                                    | 2/2279  | 4/18866   | 0.0740726 | 0.4037661 | 0.3653419 | 2  | GSN/DOCK2                                                                                                                                                                                                                                                                                                                                                                                                                                   |
| Biological Process | GO:0001878 | response to yeast                                                             | 2/2279  | 4/18866   | 0.0740726 | 0.4037661 | 0.3653419 | 2  | ELANE/MPO                                                                                                                                                                                                                                                                                                                                                                                                                                   |
| Biological Process | GO:0002051 | osteoblast fate commitment                                                    | 2/2279  | 4/18866   | 0.0740726 | 0.4037661 | 0.3653419 | 2  | SH3PXD2B/RUNX2                                                                                                                                                                                                                                                                                                                                                                                                                              |
| Biological Process | GO:0002074 | extraocular skeletal muscle development                                       | 2/2279  | 4/18866   | 0.0740726 | 0.4037661 | 0.3653419 | 2  | MYH15/MYOM1                                                                                                                                                                                                                                                                                                                                                                                                                                 |
| Biological Process | GO:0002159 | desmosome assembly                                                            | 2/2279  | 4/18866   | 0.0740726 | 0.4037661 | 0.3653419 | 2  | PRKCA/JUP                                                                                                                                                                                                                                                                                                                                                                                                                                   |

|                    |            |                                                                           |        |         |           |           |           |   |               |
|--------------------|------------|---------------------------------------------------------------------------|--------|---------|-----------|-----------|-----------|---|---------------|
| Biological Process | GO:0002265 | astrocyte activation involved in immune response                          | 2/2279 | 4/18866 | 0.0740726 | 0.4037661 | 0.3653419 | 2 | APP/GRN       |
| Biological Process | GO:0002378 | immunoglobulin biosynthetic process                                       | 2/2279 | 4/18866 | 0.0740726 | 0.4037661 | 0.3653419 | 2 | GALNT2/PTPRC  |
| Biological Process | GO:0002434 | immune complex clearance                                                  | 2/2279 | 4/18866 | 0.0740726 | 0.4037661 | 0.3653419 | 2 | CCR2/CLU      |
| Biological Process | GO:0002439 | chronic inflammatory response to antigenic stimulus                       | 2/2279 | 4/18866 | 0.0740726 | 0.4037661 | 0.3653419 | 2 | IL10/TNF      |
| Biological Process | GO:0002605 | negative regulation of dendritic cell antigen processing and presentation | 2/2279 | 4/18866 | 0.0740726 | 0.4037661 | 0.3653419 | 2 | THBS1/CD68    |
| Biological Process | GO:0003105 | negative regulation of glomerular filtration                              | 2/2279 | 4/18866 | 0.0740726 | 0.4037661 | 0.3653419 | 2 | GJA5/F2R      |
| Biological Process | GO:0003273 | cell migration involved in endocardial cushion formation                  | 2/2279 | 4/18866 | 0.0740726 | 0.4037661 | 0.3653419 | 2 | ENG/NOTCH1    |
| Biological Process | GO:0003383 | apical constriction                                                       | 2/2279 | 4/18866 | 0.0740726 | 0.4037661 | 0.3653419 | 2 | CCDC88C/FRMD6 |
| Biological Process | GO:0003419 | growth plate cartilage chondrocyte proliferation                          | 2/2279 | 4/18866 | 0.0740726 | 0.4037661 | 0.3653419 | 2 | POR/NPPC      |

|                    |            |                                                                                 |        |         |           |           |           |   |                 |
|--------------------|------------|---------------------------------------------------------------------------------|--------|---------|-----------|-----------|-----------|---|-----------------|
| Biological Process | GO:0006574 | valine catabolic process                                                        | 2/2279 | 4/18866 | 0.0740726 | 0.4037661 | 0.3653419 | 2 | ACAD8/HIBADH    |
| Biological Process | GO:0006660 | phosphatidylserine catabolic process                                            | 2/2279 | 4/18866 | 0.0740726 | 0.4037661 | 0.3653419 | 2 | ABHD16A/ABHD16B |
| Biological Process | GO:0006842 | tricarboxylic acid transport                                                    | 2/2279 | 4/18866 | 0.0740726 | 0.4037661 | 0.3653419 | 2 | SLC13A5/SLC25A1 |
| Biological Process | GO:0006933 | negative regulation of cell adhesion involved in substrate-bound cell migration | 2/2279 | 4/18866 | 0.0740726 | 0.4037661 | 0.3653419 | 2 | ITGB1BP1/PTPRC  |
| Biological Process | GO:0007296 | vitellogenesis                                                                  | 2/2279 | 4/18866 | 0.0740726 | 0.4037661 | 0.3653419 | 2 | ZMIZ1/ETV6      |
| Biological Process | GO:0007468 | regulation of rhodopsin gene expression                                         | 2/2279 | 4/18866 | 0.0740726 | 0.4037661 | 0.3653419 | 2 | MFSD2A/NRL      |
| Biological Process | GO:0009093 | cysteine catabolic process                                                      | 2/2279 | 4/18866 | 0.0740726 | 0.4037661 | 0.3653419 | 2 | CBS/AGXT        |
| Biological Process | GO:0009182 | purine deoxyribonucleoside diphosphate metabolic process                        | 2/2279 | 4/18866 | 0.0740726 | 0.4037661 | 0.3653419 | 2 | GUK1/AK5        |
| Biological Process | GO:0009189 | deoxyribonucleoside diphosphate biosynthetic process                            | 2/2279 | 4/18866 | 0.0740726 | 0.4037661 | 0.3653419 | 2 | GUK1/AK5        |



|                    |            |                                                                                               |        |         |           |           |           |   |                 |
|--------------------|------------|-----------------------------------------------------------------------------------------------|--------|---------|-----------|-----------|-----------|---|-----------------|
| Biological Process | GO:0010735 | positive regulation of transcription via serum response element binding                       | 2/2279 | 4/18866 | 0.0740726 | 0.4037661 | 0.3653419 | 2 | MICAL2/MRTFA    |
| Biological Process | GO:0014005 | microglia development                                                                         | 2/2279 | 4/18866 | 0.0740726 | 0.4037661 | 0.3653419 | 2 | APP/TSPAN2      |
| Biological Process | GO:0014809 | regulation of skeletal muscle contraction by regulation of release of sequestered calcium ion | 2/2279 | 4/18866 | 0.0740726 | 0.4037661 | 0.3653419 | 2 | GSTO1/CASQ1     |
| Biological Process | GO:0015746 | citrate transport                                                                             | 2/2279 | 4/18866 | 0.0740726 | 0.4037661 | 0.3653419 | 2 | SLC13A5/SLC25A1 |
| Biological Process | GO:0015879 | carnitine transport                                                                           | 2/2279 | 4/18866 | 0.0740726 | 0.4037661 | 0.3653419 | 2 | SLC22A5/PDZK1   |
| Biological Process | GO:0018120 | peptidyl-arginine ADP-ribosylation                                                            | 2/2279 | 4/18866 | 0.0740726 | 0.4037661 | 0.3653419 | 2 | ART5/ART4       |
| Biological Process | GO:0019344 | cysteine biosynthetic process                                                                 | 2/2279 | 4/18866 | 0.0740726 | 0.4037661 | 0.3653419 | 2 | GGT1/CBS        |
| Biological Process | GO:0019448 | L-cysteine catabolic process                                                                  | 2/2279 | 4/18866 | 0.0740726 | 0.4037661 | 0.3653419 | 2 | CBS/AGXT        |
| Biological Process | GO:0019470 | 4-hydroxyproline catabolic process                                                            | 2/2279 | 4/18866 | 0.0740726 | 0.4037661 | 0.3653419 | 2 | ALDH4A1/HOGA1   |

|                    |            |                                                                                                |        |         |           |           |           |   |                |
|--------------------|------------|------------------------------------------------------------------------------------------------|--------|---------|-----------|-----------|-----------|---|----------------|
| Biological Process | GO:0019471 | 4-hydroxyproline metabolic process                                                             | 2/2279 | 4/18866 | 0.0740726 | 0.4037661 | 0.3653419 | 2 | ALDH4A1/HOGA1  |
| Biological Process | GO:0019482 | beta-alanine metabolic process                                                                 | 2/2279 | 4/18866 | 0.0740726 | 0.4037661 | 0.3653419 | 2 | DPYS/UPB1      |
| Biological Process | GO:0021557 | oculomotor nerve development                                                                   | 2/2279 | 4/18866 | 0.0740726 | 0.4037661 | 0.3653419 | 2 | PHOX2A/HES3    |
| Biological Process | GO:0031034 | myosin filament assembly                                                                       | 2/2279 | 4/18866 | 0.0740726 | 0.4037661 | 0.3653419 | 2 | TTN/MYH11      |
| Biological Process | GO:0031296 | B cell costimulation                                                                           | 2/2279 | 4/18866 | 0.0740726 | 0.4037661 | 0.3653419 | 2 | TNFSF13B/CD320 |
| Biological Process | GO:0031587 | positive regulation of inositol 1,4,5-trisphosphate-sensitive calcium-release channel activity | 2/2279 | 4/18866 | 0.0740726 | 0.4037661 | 0.3653419 | 2 | P2RY6/HTT      |
| Biological Process | GO:0032097 | positive regulation of response to food                                                        | 2/2279 | 4/18866 | 0.0740726 | 0.4037661 | 0.3653419 | 2 | GHRL/NPY       |
| Biological Process | GO:0032100 | positive regulation of appetite                                                                | 2/2279 | 4/18866 | 0.0740726 | 0.4037661 | 0.3653419 | 2 | GHRL/NPY       |
| Biological Process | GO:0032417 | positive regulation of sodium:proton antiporter activity                                       | 2/2279 | 4/18866 | 0.0740726 | 0.4037661 | 0.3653419 | 2 | TESC/ACTN4     |

|                    |            |                                                            |        |         |           |           |           |   |                   |
|--------------------|------------|------------------------------------------------------------|--------|---------|-----------|-----------|-----------|---|-------------------|
| Biological Process | GO:0032605 | hepatocyte growth factor production                        | 2/2279 | 4/18866 | 0.0740726 | 0.4037661 | 0.3653419 | 2 | MIR199A1/MIR199A2 |
| Biological Process | GO:0032646 | regulation of hepatocyte growth factor production          | 2/2279 | 4/18866 | 0.0740726 | 0.4037661 | 0.3653419 | 2 | MIR199A1/MIR199A2 |
| Biological Process | GO:0032686 | negative regulation of hepatocyte growth factor production | 2/2279 | 4/18866 | 0.0740726 | 0.4037661 | 0.3653419 | 2 | MIR199A1/MIR199A2 |
| Biological Process | GO:0032701 | negative regulation of interleukin-18 production           | 2/2279 | 4/18866 | 0.0740726 | 0.4037661 | 0.3653419 | 2 | IL10/CD84         |
| Biological Process | GO:0034436 | glycoprotein transport                                     | 2/2279 | 4/18866 | 0.0740726 | 0.4037661 | 0.3653419 | 2 | ABCG1/GUK1        |
| Biological Process | GO:0034465 | response to carbon monoxide                                | 2/2279 | 4/18866 | 0.0740726 | 0.4037661 | 0.3653419 | 2 | IL10/DNM2         |
| Biological Process | GO:0034552 | respiratory chain complex II assembly                      | 2/2279 | 4/18866 | 0.0740726 | 0.4037661 | 0.3653419 | 2 | SDHAF1/SDHAF3     |
| Biological Process | GO:0034553 | mitochondrial respiratory chain complex II assembly        | 2/2279 | 4/18866 | 0.0740726 | 0.4037661 | 0.3653419 | 2 | SDHAF1/SDHAF3     |
| Biological Process | GO:0035788 | cell migration involved in metanephros development         | 2/2279 | 4/18866 | 0.0740726 | 0.4037661 | 0.3653419 | 2 | PDGFB/PDGFRB      |

|                    |            |                                                                        |        |         |           |           |           |   |               |
|--------------------|------------|------------------------------------------------------------------------|--------|---------|-----------|-----------|-----------|---|---------------|
| Biological Process | GO:0035789 | metanephric mesenchymal cell migration                                 | 2/2279 | 4/18866 | 0.0740726 | 0.4037661 | 0.3653419 | 2 | PDGFB/PDGFRB  |
| Biological Process | GO:0035799 | ureter maturation                                                      | 2/2279 | 4/18866 | 0.0740726 | 0.4037661 | 0.3653419 | 2 | PAX2/ALDH1A2  |
| Biological Process | GO:0036510 | trimming of terminal mannose on C branch                               | 2/2279 | 4/18866 | 0.0740726 | 0.4037661 | 0.3653419 | 2 | EDEM1/EDEM2   |
| Biological Process | GO:0042126 | nitrate metabolic process                                              | 2/2279 | 4/18866 | 0.0740726 | 0.4037661 | 0.3653419 | 2 | POR/MTARC1    |
| Biological Process | GO:0042699 | follicle-stimulating hormone signaling pathway                         | 2/2279 | 4/18866 | 0.0740726 | 0.4037661 | 0.3653419 | 2 | ARRB1/ARRB2   |
| Biological Process | GO:0042904 | 9-cis-retinoic acid biosynthetic process                               | 2/2279 | 4/18866 | 0.0740726 | 0.4037661 | 0.3653419 | 2 | DHRS9/ALDH1A2 |
| Biological Process | GO:0042905 | 9-cis-retinoic acid metabolic process                                  | 2/2279 | 4/18866 | 0.0740726 | 0.4037661 | 0.3653419 | 2 | DHRS9/ALDH1A2 |
| Biological Process | GO:0043315 | positive regulation of neutrophil degranulation                        | 2/2279 | 4/18866 | 0.0740726 | 0.4037661 | 0.3653419 | 2 | CD177/ITGB2   |
| Biological Process | GO:0043378 | positive regulation of CD8-positive, alpha-beta T cell differentiation | 2/2279 | 4/18866 | 0.0740726 | 0.4037661 | 0.3653419 | 2 | RUNX1/RUNX3   |

|                    |            |                                                                                                              |        |         |           |           |           |   |             |
|--------------------|------------|--------------------------------------------------------------------------------------------------------------|--------|---------|-----------|-----------|-----------|---|-------------|
| Biological Process | GO:0045608 | negative regulation of inner ear auditory receptor cell differentiation                                      | 2/2279 | 4/18866 | 0.0740726 | 0.4037661 | 0.3653419 | 2 | DLL1/NOTCH1 |
| Biological Process | GO:0045632 | negative regulation of mechanoreceptor differentiation                                                       | 2/2279 | 4/18866 | 0.0740726 | 0.4037661 | 0.3653419 | 2 | DLL1/NOTCH1 |
| Biological Process | GO:0046439 | L-cysteine metabolic process                                                                                 | 2/2279 | 4/18866 | 0.0740726 | 0.4037661 | 0.3653419 | 2 | CBS/AGXT    |
| Biological Process | GO:0046952 | ketone body catabolic process                                                                                | 2/2279 | 4/18866 | 0.0740726 | 0.4037661 | 0.3653419 | 2 | BDH1/ACAT1  |
| Biological Process | GO:0051790 | short-chain fatty acid biosynthetic process                                                                  | 2/2279 | 4/18866 | 0.0740726 | 0.4037661 | 0.3653419 | 2 | ACSS1/ACSS2 |
| Biological Process | GO:0060528 | secretory columnal luminal epithelial cell differentiation involved in prostate glandular acinus development | 2/2279 | 4/18866 | 0.0740726 | 0.4037661 | 0.3653419 | 2 | RXRA/NOTCH1 |
| Biological Process | GO:0061589 | calcium activated phosphatidylserine scrambling                                                              | 2/2279 | 4/18866 | 0.0740726 | 0.4037661 | 0.3653419 | 2 | ANO7/ANO6   |
| Biological Process | GO:0070235 | regulation of activation-induced cell death of T cells                                                       | 2/2279 | 4/18866 | 0.0740726 | 0.4037661 | 0.3653419 | 2 | RIPK3/FADD  |
| Biological Process | GO:0070676 | intraluminal vesicle formation                                                                               | 2/2279 | 4/18866 | 0.0740726 | 0.4037661 | 0.3653419 | 2 | SNX3/PRKN   |

|                    |            |                                                                                                   |        |         |           |           |           |   |               |
|--------------------|------------|---------------------------------------------------------------------------------------------------|--------|---------|-----------|-----------|-----------|---|---------------|
| Biological Process | GO:0070777 | D-aspartate transport                                                                             | 2/2279 | 4/18866 | 0.0740726 | 0.4037661 | 0.3653419 | 2 | SLC1A2/SLC1A3 |
| Biological Process | GO:0070779 | D-aspartate import across plasma membrane                                                         | 2/2279 | 4/18866 | 0.0740726 | 0.4037661 | 0.3653419 | 2 | SLC1A2/SLC1A3 |
| Biological Process | GO:0071211 | protein targeting to vacuole involved in autophagy                                                | 2/2279 | 4/18866 | 0.0740726 | 0.4037661 | 0.3653419 | 2 | CLU/SMURF1    |
| Biological Process | GO:0071787 | endoplasmic reticulum tubular network formation                                                   | 2/2279 | 4/18866 | 0.0740726 | 0.4037661 | 0.3653419 | 2 | RTN4/RTN3     |
| Biological Process | GO:0072108 | positive regulation of mesenchymal to epithelial transition involved in metanephros morphogenesis | 2/2279 | 4/18866 | 0.0740726 | 0.4037661 | 0.3653419 | 2 | PAX2/LIF      |
| Biological Process | GO:0090038 | negative regulation of protein kinase C signaling                                                 | 2/2279 | 4/18866 | 0.0740726 | 0.4037661 | 0.3653419 | 2 | DGKD/MYADM    |
| Biological Process | GO:0090107 | regulation of high-density lipoprotein particle assembly                                          | 2/2279 | 4/18866 | 0.0740726 | 0.4037661 | 0.3653419 | 2 | NR1H2/ABCA1   |
| Biological Process | GO:0090168 | Golgi reassembly                                                                                  | 2/2279 | 4/18866 | 0.0740726 | 0.4037661 | 0.3653419 | 2 | VCPIP1/YWHAZ  |
| Biological Process | GO:0097118 | neuroligin clustering involved in postsynaptic membrane assembly                                  | 2/2279 | 4/18866 | 0.0740726 | 0.4037661 | 0.3653419 | 2 | NRXN1/NRXN2   |

|                    |            |                                                                                          |        |         |           |           |           |   |               |
|--------------------|------------|------------------------------------------------------------------------------------------|--------|---------|-----------|-----------|-----------|---|---------------|
| Biological Process | GO:0097167 | circadian regulation of translation                                                      | 2/2279 | 4/18866 | 0.0740726 | 0.4037661 | 0.3653419 | 2 | PER2/PER1     |
| Biological Process | GO:0097241 | hematopoietic stem cell migration to bone marrow                                         | 2/2279 | 4/18866 | 0.0740726 | 0.4037661 | 0.3653419 | 2 | GPLD1/JAM3    |
| Biological Process | GO:0099039 | sphingolipid translocation                                                               | 2/2279 | 4/18866 | 0.0740726 | 0.4037661 | 0.3653419 | 2 | ABCC1/ABCA1   |
| Biological Process | GO:0099576 | regulation of protein catabolic process at postsynapse, modulating synaptic transmission | 2/2279 | 4/18866 | 0.0740726 | 0.4037661 | 0.3653419 | 2 | RNF19A/CDH1   |
| Biological Process | GO:0140009 | L-aspartate import across plasma membrane                                                | 2/2279 | 4/18866 | 0.0740726 | 0.4037661 | 0.3653419 | 2 | SLC1A5/SLC1A3 |
| Biological Process | GO:1900126 | negative regulation of hyaluronan biosynthetic process                                   | 2/2279 | 4/18866 | 0.0740726 | 0.4037661 | 0.3653419 | 2 | AP2A1/TGFB1   |
| Biological Process | GO:1900133 | regulation of renin secretion into blood stream                                          | 2/2279 | 4/18866 | 0.0740726 | 0.4037661 | 0.3653419 | 2 | GJA5/F2R      |
| Biological Process | GO:1900240 | negative regulation of phenotypic switching                                              | 2/2279 | 4/18866 | 0.0740726 | 0.4037661 | 0.3653419 | 2 | MIR145/DNMT1  |
| Biological Process | GO:1901671 | positive regulation of superoxide dismutase activity                                     | 2/2279 | 4/18866 | 0.0740726 | 0.4037661 | 0.3653419 | 2 | TNF/SIRT3     |

|                    |            |                                                                       |        |         |           |           |           |   |               |
|--------------------|------------|-----------------------------------------------------------------------|--------|---------|-----------|-----------|-----------|---|---------------|
| Biological Process | GO:1902565 | positive regulation of neutrophil activation                          | 2/2279 | 4/18866 | 0.0740726 | 0.4037661 | 0.3653419 | 2 | CD177/ITGB2   |
| Biological Process | GO:1902730 | positive regulation of proteoglycan biosynthetic process              | 2/2279 | 4/18866 | 0.0740726 | 0.4037661 | 0.3653419 | 2 | TCF7L2/PXYLP1 |
| Biological Process | GO:1903463 | regulation of mitotic cell cycle DNA replication                      | 2/2279 | 4/18866 | 0.0740726 | 0.4037661 | 0.3653419 | 2 | FGFR1/CHEK2   |
| Biological Process | GO:1903903 | regulation of establishment of T cell polarity                        | 2/2279 | 4/18866 | 0.0740726 | 0.4037661 | 0.3653419 | 2 | GSN/DOCK8     |
| Biological Process | GO:1904154 | positive regulation of retrograde protein transport, ER to cytosol    | 2/2279 | 4/18866 | 0.0740726 | 0.4037661 | 0.3653419 | 2 | EDEM1/EDEM2   |
| Biological Process | GO:1904340 | positive regulation of dopaminergic neuron differentiation            | 2/2279 | 4/18866 | 0.0740726 | 0.4037661 | 0.3653419 | 2 | CSNK1D/CSNK1E |
| Biological Process | GO:1904431 | positive regulation of t-circle formation                             | 2/2279 | 4/18866 | 0.0740726 | 0.4037661 | 0.3653419 | 2 | ERCC1/SLX4    |
| Biological Process | GO:1904505 | regulation of telomere maintenance in response to DNA damage          | 2/2279 | 4/18866 | 0.0740726 | 0.4037661 | 0.3653419 | 2 | RTEL1/ERCC1   |
| Biological Process | GO:1904506 | negative regulation of telomere maintenance in response to DNA damage | 2/2279 | 4/18866 | 0.0740726 | 0.4037661 | 0.3653419 | 2 | RTEL1/ERCC1   |



|                    |            |                                                             |        |         |           |           |           |   |                   |
|--------------------|------------|-------------------------------------------------------------|--------|---------|-----------|-----------|-----------|---|-------------------|
| Biological Process | GO:1904833 | positive regulation of removal of superoxide radicals       | 2/2279 | 4/18866 | 0.0740726 | 0.4037661 | 0.3653419 | 2 | TNF/SIRT3         |
| Biological Process | GO:1905180 | positive regulation of cardiac muscle tissue regeneration   | 2/2279 | 4/18866 | 0.0740726 | 0.4037661 | 0.3653419 | 2 | MIR199A1/MIR199A2 |
| Biological Process | GO:1905702 | regulation of inhibitory synapse assembly                   | 2/2279 | 4/18866 | 0.0740726 | 0.4037661 | 0.3653419 | 2 | SEMA4A/SEMA4D     |
| Biological Process | GO:1905908 | positive regulation of amyloid fibril formation             | 2/2279 | 4/18866 | 0.0740726 | 0.4037661 | 0.3653419 | 2 | APP/CLU           |
| Biological Process | GO:1990258 | histone glutamine methylation                               | 2/2279 | 4/18866 | 0.0740726 | 0.4037661 | 0.3653419 | 2 | CREBBP/FBL        |
| Biological Process | GO:1990743 | protein sialylation                                         | 2/2279 | 4/18866 | 0.0740726 | 0.4037661 | 0.3653419 | 2 | ST3GAL4/ST3GAL2   |
| Biological Process | GO:1990809 | endoplasmic reticulum tubular network membrane organization | 2/2279 | 4/18866 | 0.0740726 | 0.4037661 | 0.3653419 | 2 | RTN4/ATL1         |
| Biological Process | GO:1990910 | response to hypobaric hypoxia                               | 2/2279 | 4/18866 | 0.0740726 | 0.4037661 | 0.3653419 | 2 | FIS1/DNM1L        |
| Biological Process | GO:2000589 | regulation of metanephric mesenchymal cell migration        | 2/2279 | 4/18866 | 0.0740726 | 0.4037661 | 0.3653419 | 2 | PDGFB/PDGFRB      |

|                    |            |                                                                                            |         |           |           |           |           |    |                                                                                                                                                                                                                                                                                                            |               |
|--------------------|------------|--------------------------------------------------------------------------------------------|---------|-----------|-----------|-----------|-----------|----|------------------------------------------------------------------------------------------------------------------------------------------------------------------------------------------------------------------------------------------------------------------------------------------------------------|---------------|
| Biological Process | GO:2000622 | regulation of nuclear-transcribed mRNA catabolic process, nonsense-mediated decay          | 2/2279  | 4/18866   | 0.0740726 | 0.4037661 | 0.3653419 | 2  |                                                                                                                                                                                                                                                                                                            | NBAS/SECISBP2 |
| Biological Process | GO:2000623 | negative regulation of nuclear-transcribed mRNA catabolic process, nonsense-mediated decay | 2/2279  | 4/18866   | 0.0740726 | 0.4037661 | 0.3653419 | 2  |                                                                                                                                                                                                                                                                                                            | NBAS/SECISBP2 |
| Biological Process | GO:2000670 | positive regulation of dendritic cell apoptotic process                                    | 2/2279  | 4/18866   | 0.0740726 | 0.4037661 | 0.3653419 | 2  |                                                                                                                                                                                                                                                                                                            | RAPGEF2/BLK   |
| Biological Process | GO:2000981 | negative regulation of inner ear receptor cell differentiation                             | 2/2279  | 4/18866   | 0.0740726 | 0.4037661 | 0.3653419 | 2  |                                                                                                                                                                                                                                                                                                            | DLL1/NOTCH1   |
| Biological Process | GO:2001013 | epithelial cell proliferation involved in renal tubule morphogenesis                       | 2/2279  | 4/18866   | 0.0740726 | 0.4037661 | 0.3653419 | 2  |                                                                                                                                                                                                                                                                                                            | MTSS1/MEF2C   |
| Biological Process | GO:2001253 | regulation of histone H3-K36 trimethylation                                                | 2/2279  | 4/18866   | 0.0740726 | 0.4037661 | 0.3653419 | 2  |                                                                                                                                                                                                                                                                                                            | BRD4/NSD3     |
| Biological Process | GO:0051604 | protein maturation                                                                         | 44/2279 | 293/18866 | 0.074593  | 0.4063691 | 0.3676972 | 44 | CTSZ/NLRC4/CTSG/SORL1/ENO1/CALR/PLAU/GSN/ASPRV1/GGT1/TSPAN14/CYFIP2/SPG7/TBC1D10A/MIPEP/AIP/TESC/CPD/THBS1/MYH9/HM13/CTSH/HSCB/PCSK6/CIDEB/F12/PERP/ADAMTS13/CREBBP/NOL3/AEBP1/CPB2/NAA16/CASP1/LMF1/ASPH/ATP7B/CLN5/FADD/C1RL/SPCS1/ANGPTL8/VSIR/AOPEP                                                    |               |
| Biological Process | GO:1903829 | positive regulation of cellular protein localization                                       | 50/2279 | 338/18866 | 0.0749721 | 0.4082006 | 0.3693544 | 50 | SORL1/SSH1/TFDP1/TRIM8/PRR5L/TM9SF4/TMEM30A/YWHAH/ITGB1BP1/PIK3R1/RHOG/SMAD3/TNF/RTN4/MGAT3/JUP/EDEM1/USP36/ZDHHC2/TCF7L2/ABLIM3/AKAP5/UBE2J2/TGFB1/PRKCH/EDEM2/NUMA1/ZDHHC1/PRKCI/ITGB2/YWHAZ/CDH1/FIS1/BCL2/MAP1A/PRKCE/TP53BP2/MYO1C/MIEF1/CYLD/YWHAQ/EZR/PDZK1/KAT7/CCT6A/PARP9/LIF/PRKAA1/PRKN/RIPOR1 |               |
| Biological Process | GO:0097305 | response to alcohol                                                                        | 36/2279 | 234/18866 | 0.0755259 | 0.4109803 | 0.3718696 | 36 | S100A8/BLM/SPIDR/PPARG/GSN/ADCY2/ITPR2/GPLD1/LARP1/JUP/TGFBR2/RECQL5/FECH/P2RY6/SPHK2/TGFB1/FDX1/CRHBP/MLC1/RARA/HTR3A/CSF3/ABCA1/CAT/CDH1/CA3/GNG2/ACACA/SLIT3/PRKCE/NPPC/BCL2L1/GRAMD1A/HMGCS1/INHBA/PRKAA1                                                                                              |               |

|                    |            |                                                  |         |          |           |           |           |    |                                                                                 |
|--------------------|------------|--------------------------------------------------|---------|----------|-----------|-----------|-----------|----|---------------------------------------------------------------------------------|
| Biological Process | GO:0007422 | peripheral nervous system development            | 14/2279 | 77/18866 | 0.0761074 | 0.4139073 | 0.374518  | 14 | ARHGEF10/SH3TC2/RUNX1/SKI/LGI4/NDRG1/PMP22/ILK/NF1/FA2H/CNTNAP1/RUNX3/RELA/NTF4 |
| Biological Process | GO:0045840 | positive regulation of mitotic nuclear division  | 11/2279 | 57/18866 | 0.0767698 | 0.4154372 | 0.3759023 | 11 | TGFA/NSMCE2/CUL3/CDC16/NUMA1/PDGFB/RB1/CDC45/ANAPC7/PDGFRB/SLF1                 |
| Biological Process | GO:1905517 | macrophage migration                             | 11/2279 | 57/18866 | 0.0767698 | 0.4154372 | 0.3759023 | 11 | AZU1/CD9/C3AR1/CCR2/CCL5/CSF1R/SFTPD/THBS1/MIR24-2/CXCL17/CX3CR1                |
| Biological Process | GO:0032965 | regulation of collagen biosynthetic process      | 9/2279  | 44/18866 | 0.0769134 | 0.4154372 | 0.3759023 | 9  | PPARG/MIR145/MYB/TGFB1/ENG/ARRB2/F2R/NPPC/PDGFRB                                |
| Biological Process | GO:0033173 | calcineurin-NFAT signaling cascade               | 9/2279  | 44/18866 | 0.0769134 | 0.4154372 | 0.3759023 | 9  | TNF/NFATC2/NFATC1/CAMTA1/RCAN1/DYRK2/FHL2/CHERP/STIMATE                         |
| Biological Process | GO:0035307 | positive regulation of protein dephosphorylation | 9/2279  | 44/18866 | 0.0769134 | 0.4154372 | 0.3759023 | 9  | CAMTA1/TGFB1/PTPRC/PPP2R5D/PDGFRB/PPP1R16B/CD33/ANKLE2/PTPA                     |
| Biological Process | GO:0035329 | hippo signaling                                  | 9/2279  | 44/18866 | 0.0769134 | 0.4154372 | 0.3759023 | 9  | MARK3/TJP2/VGLL4/LIMD1/LATS2/WWTR1/STK3/TEAD2/NPHP4                             |
| Biological Process | GO:0042088 | T-helper 1 type immune response                  | 9/2279  | 44/18866 | 0.0769134 | 0.4154372 | 0.3759023 | 9  | IL27/SLC11A1/IL1R1/CCR2/SEMA4A/IL18RAP/IL18R1/HLX/BCL3                          |
| Biological Process | GO:0044060 | regulation of endocrine process                  | 9/2279  | 44/18866 | 0.0769134 | 0.4154372 | 0.3759023 | 9  | C1QTNF3/RAB11FIP1/GJA5/FGFR1/CRHBP/GHRL/F2R/AGTR1/INHBA                         |

|                    |            |                                                   |         |           |           |           |           |    |                                                                                                                                    |
|--------------------|------------|---------------------------------------------------|---------|-----------|-----------|-----------|-----------|----|------------------------------------------------------------------------------------------------------------------------------------|
| Biological Process | GO:0045332 | phospholipid translocation                        | 9/2279  | 44/18866  | 0.0769134 | 0.4154372 | 0.3759023 | 9  | ABCC1/TMEM30A/ATP8A1/ANO7/ATP11A/ATP8B1/ABCA1/ATP8B4/ANO6                                                                          |
| Biological Process | GO:0045687 | positive regulation of glial cell differentiation | 9/2279  | 44/18866  | 0.0769134 | 0.4154372 | 0.3759023 | 9  | PPARG/TNFRSF1B/RHEB/BIN1/HDAC1/TGFB1/NOTCH1/RELA/LIF                                                                               |
| Biological Process | GO:1901985 | positive regulation of protein acetylation        | 9/2279  | 44/18866  | 0.0769134 | 0.4154372 | 0.3759023 | 9  | ARRB1/RPS6KA4/SPHK2/ARNTL/PIH1D1/KAT7/LIF/PAXIP1/PRKAA1                                                                            |
| Biological Process | GO:2000404 | regulation of T cell migration                    | 9/2279  | 44/18866  | 0.0769134 | 0.4154372 | 0.3759023 | 9  | CCR2/CCL5/APP/DOCK8/RIPK3/CCL20/C10orf99/CCL27/FADD                                                                                |
| Biological Process | GO:0033045 | regulation of sister chromatid segregation        | 15/2279 | 84/18866  | 0.0772901 | 0.4167611 | 0.3771002 | 15 | MAD1L1/TNKS/RMI2/NSMCE2/CUL3/CDC16/TACC3/NUMA1/NEK6/RB1/CDCA5/ANAPC7/HECW2/PCID2/SLF1                                              |
| Biological Process | GO:0048144 | fibroblast proliferation                          | 15/2279 | 84/18866  | 0.0772901 | 0.4167611 | 0.3771002 | 15 | PPARG/CREB1/MYB/SKI/ZMIZ1/B4GALT7/AQP1/NF1/PDGFD/PDGFB/MORC3/MED25/PDGFC/PDGFRB/PARP10                                             |
| Biological Process | GO:0097061 | dendritic spine organization                      | 15/2279 | 84/18866  | 0.0772901 | 0.4167611 | 0.3771002 | 15 | ZMYND8/CTTN/TANC1/EPHB3/BAIAP2/IGF1R/WASL/SIPA1L1/DOCK10/DNM3/DNM1L/SHANK2/UBE3A/CUX2/DBNL                                         |
| Biological Process | GO:0006165 | nucleoside diphosphate phosphorylation            | 22/2279 | 133/18866 | 0.0776804 | 0.4186283 | 0.3787897 | 22 | FOXK1/HDAC4/PRKAG2/ENO1/HK1/PFKFB4/RAE1/CBFA2T3/DHTKD1/APP/OGDH/ADPGK/P GAM1/NUP93/ENO3/HK2/SEC13/ESRRB/PKM/AK5/PFKFB3/PRKAA1      |
| Biological Process | GO:0055007 | cardiac muscle cell differentiation               | 21/2279 | 126/18866 | 0.0781629 | 0.4205909 | 0.3805656 | 21 | RXRA/CALR/CTDP1/MYO18B/TTN/MYH11/AKAP13/MAML1/SLC8A1/MIR199A1/DLL1/RBPJ/MIR24-2/MIR23A/TGFB1/RARA/ARRB2/MIR199A2/MEF2C/FHL2/PDGFRB |

|                    |            |                                                                   |         |           |           |           |           |    |                                                                                                                      |
|--------------------|------------|-------------------------------------------------------------------|---------|-----------|-----------|-----------|-----------|----|----------------------------------------------------------------------------------------------------------------------|
| Biological Process | GO:0048259 | regulation of receptor-mediated endocytosis                       | 18/2279 | 105/18866 | 0.0787431 | 0.4205909 | 0.3805656 | 18 | AP2A1/ANGPT1/AAK1/ARRB1/DNM2/MIR199A1/ANKRD13B/ANKRD13D/CLU/WASL/NUMB/ITGB3/ANKRD13A/DGKD/GSG1L/ARRB2/MIR199A2/FLOT1 |
| Biological Process | GO:0006878 | cellular copper ion homeostasis                                   | 4/2279  | 14/18866  | 0.0788414 | 0.4205909 | 0.3805656 | 4  | COX19/APP/ATOX1/ATP7B                                                                                                |
| Biological Process | GO:0010649 | regulation of cell communication by electrical coupling           | 4/2279  | 14/18866  | 0.0788414 | 0.4205909 | 0.3805656 | 4  | PDE4D/CASQ2/SLC8A1/GJA5                                                                                              |
| Biological Process | GO:0010896 | regulation of triglyceride catabolic process                      | 4/2279  | 14/18866  | 0.0788414 | 0.4205909 | 0.3805656 | 4  | PNPLA2/SORL1/GPLD1/ABHD5                                                                                             |
| Biological Process | GO:0010989 | negative regulation of low-density lipoprotein particle clearance | 4/2279  | 14/18866  | 0.0788414 | 0.4205909 | 0.3805656 | 4  | MIR199A1/MIR27A/CSK/MIR199A2                                                                                         |
| Biological Process | GO:0030213 | hyaluronan biosynthetic process                                   | 4/2279  | 14/18866  | 0.0788414 | 0.4205909 | 0.3805656 | 4  | AP2A1/TGFB1/PDGFB/HAS3                                                                                               |
| Biological Process | GO:0034616 | response to laminar fluid shear stress                            | 4/2279  | 14/18866  | 0.0788414 | 0.4205909 | 0.3805656 | 4  | SMAD7/ABCA1/ETS1/NFE2L2                                                                                              |
| Biological Process | GO:0038166 | angiotensin-activated signaling pathway                           | 4/2279  | 14/18866  | 0.0788414 | 0.4205909 | 0.3805656 | 4  | MIR143/MIR145/AGTRAP/AGTR1                                                                                           |
| Biological Process | GO:0046037 | GMP metabolic process                                             | 4/2279  | 14/18866  | 0.0788414 | 0.4205909 | 0.3805656 | 4  | TJP2/GUK1/GMPR2/IMPDH1                                                                                               |

|                    |            |                                                                               |         |           |           |           |           |    |                                                                                                                                                                                                                             |
|--------------------|------------|-------------------------------------------------------------------------------|---------|-----------|-----------|-----------|-----------|----|-----------------------------------------------------------------------------------------------------------------------------------------------------------------------------------------------------------------------------|
| Biological Process | GO:0051938 | L-glutamate import                                                            | 4/2279  | 14/18866  | 0.0788414 | 0.4205909 | 0.3805656 | 4  | SLC1A2/SLC1A6/PER2/SLC1A3                                                                                                                                                                                                   |
| Biological Process | GO:0055064 | chloride ion homeostasis                                                      | 4/2279  | 14/18866  | 0.0788414 | 0.4205909 | 0.3805656 | 4  | ABCC2/SLC12A1/CA12/SLC12A7                                                                                                                                                                                                  |
| Biological Process | GO:0072216 | positive regulation of metanephros development                                | 4/2279  | 14/18866  | 0.0788414 | 0.4205909 | 0.3805656 | 4  | PAX2/PDGFB/PDGFRB/LIF                                                                                                                                                                                                       |
| Biological Process | GO:0090128 | regulation of synapse maturation                                              | 4/2279  | 14/18866  | 0.0788414 | 0.4205909 | 0.3805656 | 4  | DISC1/NRXN1/YWHAZ/ARHGEF15                                                                                                                                                                                                  |
| Biological Process | GO:0090239 | regulation of histone H4 acetylation                                          | 4/2279  | 14/18866  | 0.0788414 | 0.4205909 | 0.3805656 | 4  | ARRB1/CTBP1/PIH1D1/KAT7                                                                                                                                                                                                     |
| Biological Process | GO:0098787 | mRNA cleavage involved in mRNA processing                                     | 4/2279  | 14/18866  | 0.0788414 | 0.4205909 | 0.3805656 | 4  | FIP1L1/ERN1/CPSF4/TUT1                                                                                                                                                                                                      |
| Biological Process | GO:1902894 | negative regulation of pri-miRNA transcription by RNA polymerase II           | 4/2279  | 14/18866  | 0.0788414 | 0.4205909 | 0.3805656 | 4  | HDAC4/LILRB4/PDGFB/RELA                                                                                                                                                                                                     |
| Biological Process | GO:1905064 | negative regulation of vascular associated smooth muscle cell differentiation | 4/2279  | 14/18866  | 0.0788414 | 0.4205909 | 0.3805656 | 4  | NFATC2/NFATC1/PDGFB/DNMT1                                                                                                                                                                                                   |
| Biological Process | GO:0001505 | regulation of neurotransmitter levels                                         | 36/2279 | 235/18866 | 0.0792429 | 0.4223235 | 0.3821333 | 36 | RAP1B/COLQ/COMT/GIT1/SLC44A4/SYN3/PTPRN2/PPFIA1/APBA2/PRKCB/MCTP2/NF1/NRXN1/VPS18/SYN2/SLC1A2/CTBP2/ITGB3/CHRM2/SLC1A6/NRXN2/PER2/SYNGR3/SLC1A3/RPH3A/P2RX1/DNM1L/MEF2C/SYT17/CACNA1B/SLC29A1/FLOT1/DTNBP1/ZNF219/HNMT/PRKN |

|                    |            |                                                              |         |           |           |           |           |    |                                                                                                                                                                                                                                                                                                                 |
|--------------------|------------|--------------------------------------------------------------|---------|-----------|-----------|-----------|-----------|----|-----------------------------------------------------------------------------------------------------------------------------------------------------------------------------------------------------------------------------------------------------------------------------------------------------------------|
| Biological Process | GO:0006936 | muscle contraction                                           | 53/2279 | 362/18866 | 0.0792551 | 0.4223235 | 0.3821333 | 53 | HDAC4/PDE4D/ENO1/KCNE1/TTN/CASQ2/MIR143/MIR145/MYH11/MAP2K6/CACNA1C/FXYD1/MYLK/SLC8A1/CTTN/ANXA6/GJA5/MYL12A/TNNT3/JUP/BIN1/JSRP1/NOS1AP/SMAD7/PXN/ITGB5/SCN1A/PABPN1/TMOD3/GHRL/CHRM2/SNTA1/TPCN2/KCNQ1/SNTB1/MYOM1/ANKRD2/MYOT/GSTO1/GNAO1/P2RX1/F2R/DYSF/ANK2/ASPH/TMOD1/MYL7/CASQ1/SMTN/LTB4R/DAPK3/MB/GRK2 |
| Biological Process | GO:0035265 | organ growth                                                 | 30/2279 | 191/18866 | 0.0793143 | 0.422402  | 0.3822043 | 30 | RXRA/CTDP1/AKAP13/MIR199A1/ANXA6/VGLL4/CCM2L/TGFBR2/DLL1/RIPK1/RBPJ/MIR24-2/MIR23A/POC1A/LATS2/FGFR1/RARA/POR/RARG/STK3/ACACB/MEIS1/BCL2/MIR199A2/NOTCH1/MEF2C/UBE3A/NPPC/HLX/PDGFRB                                                                                                                            |
| Biological Process | GO:0045453 | bone resorption                                              | 12/2279 | 64/18866  | 0.0795168 | 0.4226826 | 0.3824582 | 12 | DEF8/INPP5D/PRKCA/UBASH3B/TNFAIP3/CSF1R/NF1/LRRK1/ITGB3/TMEM64/CSK/PLEKHM1                                                                                                                                                                                                                                      |
| Biological Process | GO:0051306 | mitotic sister chromatid separation                          | 12/2279 | 64/18866  | 0.0795168 | 0.4226826 | 0.3824582 | 12 | MAD1L1/NSMCE2/CUL3/CDC16/TACC3/PPP2R1A/NEK6/RB1/DIS3L2/ANAPC7/HECW2/PCID2                                                                                                                                                                                                                                       |
| Biological Process | GO:0060135 | maternal process involved in female pregnancy                | 12/2279 | 64/18866  | 0.0795168 | 0.4226826 | 0.3824582 | 12 | KLF1/BSG/RXRA/VDR/DAZAP1/GHRL/CTSB/TPPP3/STOX2/TMED2/NODAL/LIF                                                                                                                                                                                                                                                  |
| Biological Process | GO:0030073 | insulin secretion                                            | 33/2279 | 213/18866 | 0.0795449 | 0.4226826 | 0.3824582 | 33 | NADK/ITPR2/MYRIP/CACNA1C/LRP5L/ARRB1/PRKCA/GPLD1/TNF/CCL5/ITPR1/RFX3/TCF7L2/HNF1A/PTPRN2/IL1RN/ENY2/MYO5A/GIPR/BLK/GHRL/KLF7/ARNTL/PER2/SLC16A1/PRKE/SLC2A1/SREBF1/CPT1A/RPH3AL/C2CD2L/SIRT3/PRKN                                                                                                               |
| Biological Process | GO:0043010 | camera-type eye development                                  | 49/2279 | 332/18866 | 0.0796402 | 0.4229523 | 0.3827022 | 49 | SPRED2/RXRA/PDE6A/FZR1/SLC25A25/LIMK2/MFSD2A/LPCAT1/CACNA1C/LRP5L/SKI/CRB1/SMAD3/ZEB2/HIPK2/TGFBR2/MYH15/NINJ1/DLL1/HDAC1/GNAT2/PAX2/FLT1/RDH10/RARA/NF1/CRYBB1/SP3/RARG/BMPR1B/WNT5B/GRHL2/IFT140/MYOM1/MEIS1/RPGRIP1/ZHX2/SDK2/BCAR3/NRL/PDGFRB/ARHGEF15/TMOD1/ALDH1A2/INHBA/CABP4/TSKU/NPHP4/NECTIN1         |
| Biological Process | GO:1904950 | negative regulation of establishment of protein localization | 25/2279 | 155/18866 | 0.0803173 | 0.4257612 | 0.3852439 | 25 | KCNE1/WWP2/ANGPT1/ITGB1BP1/RAB11FIP1/FRMD4A/MIR199A1/SUFU/RHBD2/UBAC2/SNX3/DERL2/ENY2/NF1/GHRL/CSK/KLF7/MIR199A2/CABP1/SP100/F2R/SREBF1/ADTRP/SVIP/PRKN                                                                                                                                                         |
| Biological Process | GO:0009225 | nucleotide-sugar metabolic process                           | 8/2279  | 38/18866  | 0.0804845 | 0.4257612 | 0.3852439 | 8  | CSGALNACT1/NAGK/AMDHD2/UXS1/GUK1/PMM2/GFPT2/DPAGT1                                                                                                                                                                                                                                                              |

|                    |            |                                                        |         |           |           |           |           |    |                                                                                                                                                                                       |
|--------------------|------------|--------------------------------------------------------|---------|-----------|-----------|-----------|-----------|----|---------------------------------------------------------------------------------------------------------------------------------------------------------------------------------------|
| Biological Process | GO:0010742 | macrophage derived foam cell differentiation           | 8/2279  | 38/18866  | 0.0804845 | 0.4257612 | 0.3852439 | 8  | PPARG/ABCG1/TGFB1/PRKCH/NR1H2/ITGB3/ABCA1/AGTR1                                                                                                                                       |
| Biological Process | GO:0032094 | response to food                                       | 8/2279  | 38/18866  | 0.0804845 | 0.4257612 | 0.3852439 | 8  | MPO/SLC25A25/GHRL/BCL10/SLC16A1/SREBF1/NPY/HSD11B2                                                                                                                                    |
| Biological Process | GO:0060306 | regulation of membrane repolarization                  | 8/2279  | 38/18866  | 0.0804845 | 0.4257612 | 0.3852439 | 8  | KCNE1/CASQ2/GJA5/NOS1AP/WDR1/SNTA1/KCNQ1/ANK2                                                                                                                                         |
| Biological Process | GO:0071604 | transforming growth factor beta production             | 8/2279  | 38/18866  | 0.0804845 | 0.4257612 | 0.3852439 | 8  | LTBP1/CREB1/MYB/SMAD3/THBS1/WNT11/CDH3/ITGB6                                                                                                                                          |
| Biological Process | GO:0090077 | foam cell differentiation                              | 8/2279  | 38/18866  | 0.0804845 | 0.4257612 | 0.3852439 | 8  | PPARG/ABCG1/TGFB1/PRKCH/NR1H2/ITGB3/ABCA1/AGTR1                                                                                                                                       |
| Biological Process | GO:0090090 | negative regulation of canonical Wnt signaling pathway | 29/2279 | 184/18866 | 0.0805276 | 0.4257612 | 0.3852439 | 29 | CCDC88C/AMFR/UBAC2/CUL3/TCF7L2/LIMD1/HDAC1/LATS2/WNT11/KREMEN1/AXIN1/TLE1/WWTR1/TMEM64/WNT5B/STK3/PSMF1/KREMEN2/PSMB7/NOTCH1/FOXO1/CHD8/CYL D/ANKRD6/PTPRU/PSMD13/NPHP4/TMEM131L/PRKN |
| Biological Process | GO:0043277 | apoptotic cell clearance                               | 10/2279 | 51/18866  | 0.0815156 | 0.4275745 | 0.3868846 | 10 | RHOH/CCR2/RHOG/THBS1/MARCO/RHOBTB2/FCN1/RARA/ITGB3/TYRO3                                                                                                                              |
| Biological Process | GO:0046460 | neutral lipid biosynthetic process                     | 10/2279 | 51/18866  | 0.0815156 | 0.4275745 | 0.3868846 | 10 | PNPLA2/PLA2G15/ACSL1/MFSD2A/GPLD1/NR1H2/AVIL/PCK2/SREBF1/LPIN1                                                                                                                        |
| Biological Process | GO:0046463 | acylglycerol biosynthetic process                      | 10/2279 | 51/18866  | 0.0815156 | 0.4275745 | 0.3868846 | 10 | PNPLA2/PLA2G15/ACSL1/MFSD2A/GPLD1/NR1H2/AVIL/PCK2/SREBF1/LPIN1                                                                                                                        |



|                    |            |                                                      |         |           |           |           |           |    |                                                                                                                                                                                                              |
|--------------------|------------|------------------------------------------------------|---------|-----------|-----------|-----------|-----------|----|--------------------------------------------------------------------------------------------------------------------------------------------------------------------------------------------------------------|
| Biological Process | GO:0071827 | plasma lipoprotein particle organization             | 10/2279 | 51/18866  | 0.0815156 | 0.4275745 | 0.3868846 | 10 | P4HB/MPO/MFSD2A/LIPC/PLAGL2/ABCG1/PLTP/NR1H2/ABCA1/AGTR1                                                                                                                                                     |
| Biological Process | GO:0007029 | endoplasmic reticulum organization                   | 13/2279 | 71/18866  | 0.0815179 | 0.4275745 | 0.3868846 | 13 | LMAN2/RTN4/RTN3/MIA3/MYO5A/VCPIP1/TOR1B/ATL1/ESYT1/CASQ1/SEC31A/GRAMD2A/DOP1B                                                                                                                                |
| Biological Process | GO:0033627 | cell adhesion mediated by integrin                   | 13/2279 | 71/18866  | 0.0815179 | 0.4275745 | 0.3868846 | 13 | PLAU/ITGB1BP1/CCL5/TESC/PTPN6/ITGB5/JAM3/ITGB3/ITGB2/PDE3B/ITGB6/LIF/PLPP3                                                                                                                                   |
| Biological Process | GO:0002064 | epithelial cell development                          | 34/2279 | 221/18866 | 0.0821369 | 0.4275745 | 0.3868846 | 34 | PDE4D/CCDC88C/TJP2/SHROOM3/RAP1B/SPINT2/RHEB/TNF/CCM2/RFX3/DLL1/TNFRSF1A/FGFR1/RAPGEF2/RARA/RARG/WNT5B/GRHL2/PDGFEB/ENG/ARNTL/RILPL1/NTRK1/ADD1/NOTCH1/S1PR2/NOTCH4/TMC1/GPR4/PPP1R16B/FRMD6/TMOD1/EZR/MYADM |
| Biological Process | GO:0099504 | synaptic vesicle cycle                               | 31/2279 | 199/18866 | 0.0822516 | 0.4275745 | 0.3868846 | 31 | SYNJ2/DENND1A/PRKAR1B/RAP1B/PLD1/DNM2/ITSN1/STON1/GIT1/DDC/SYN3/APBA2/DGKQ/PRKCB/NRXN1/VPS18/SYN2/CTBP2/ACTG1/CHRM2/SH3GL1/DNM1/DNM3/P2RX1/DNM1L/SYT17/AP3D1/MX1/CYFIP1/DTNBP1/FGF14                         |
| Biological Process | GO:0046683 | response to organophosphorus                         | 22/2279 | 134/18866 | 0.0828114 | 0.4275745 | 0.3868846 | 22 | BSG/SSH1/KCNE1/ITPR2/RAP1B/SLC8A1/APP/P2RY6/FDX1/CRHBP/RAPGEF2/DGKQ/AQP1/AGXT/KCNQ1/PER1/P2RX1/SREBF1/P2RX5/RELA/EZR/AQP9                                                                                    |
| Biological Process | GO:0032874 | positive regulation of stress-activated MAPK cascade | 27/2279 | 170/18866 | 0.0829006 | 0.4275745 | 0.3868846 | 27 | MAP3K3/ERN1/ZNF622/TNF/ZEB2/TRAF2/TRAF1/HIPK2/TLR9/DUSP22/TNIK/RIPK1/APP/MTURN/SCIMP/AXIN1/SH3RF3/STK3/PLCB1/MAPK8IP2/TAOK3/NOD2/GADD45G/GDF6/ANKRD6/DBNL/MAP3K20                                            |
| Biological Process | GO:0034614 | cellular response to reactive oxygen species         | 27/2279 | 170/18866 | 0.0829006 | 0.4275745 | 0.3868846 | 27 | TRPM2/MPO/IL10/LCN2/MYB/DNM2/TNF/TRAF2/TNFAIP3/CAMKK2/RIPK1/PXN/PAX2/ZNF580/FER/AQP1/RIPK3/PDGFD/ETS1/NFE2L2/IL18RAP/GLRX2/PDGFRB/FOXO1/RELA/SIRT3/PRKAA1                                                    |
| Biological Process | GO:0060998 | regulation of dendritic spine development            | 14/2279 | 78/18866  | 0.0829268 | 0.4275745 | 0.3868846 | 14 | ZMYND8/ITSN1/DISC1/BAIAP2/ASAP1/CPEB3/SIPA1L1/DNM3/DNM1L/MEF2C/SHANK2/UBE3A/CUX2/DBNL                                                                                                                        |

|                    |            |                                                                                         |         |           |           |           |           |    |                                                                                                                                                                                                                                                                                                                                                     |
|--------------------|------------|-----------------------------------------------------------------------------------------|---------|-----------|-----------|-----------|-----------|----|-----------------------------------------------------------------------------------------------------------------------------------------------------------------------------------------------------------------------------------------------------------------------------------------------------------------------------------------------------|
| Biological Process | GO:0072332 | intrinsic apoptotic signaling pathway by p53 class mediator                             | 14/2279 | 78/18866  | 0.0829268 | 0.4275745 | 0.3868846 | 14 | BRCA2/HIPK2/RRM2B/ZNF385A/PERP/CDIP1/DYRK2/ANKRD2/BCL2/CHEK2/TP53BP2/BCL3/PRKN/MARCHF7                                                                                                                                                                                                                                                              |
| Biological Process | GO:0043414 | macromolecule methylation                                                               | 47/2279 | 318/18866 | 0.0829855 | 0.4275745 | 0.3868846 | 47 | PIWIL4/GFI1/BRD4/THADA/METTL21A/MOV10L1/MYB/PRMT2/ASH2L/SNRPD3/SETD2/GATAD2A/SMYD3/EHMT2/WDR82/PAX7/METTL6/KMT2D/KDM1B/ATF7IP/KDM4C/SETD1B/GRHL2/SETD1A/CREBBP/TET2/MTA2/ZNF335/METTL22/PRDM16/PHF19/DNMT1/PIH1D1/MORC1/RBM15B/DYDC2/DYDC1/NTMT1/FBL/MECOM/METTL8/PAXIP1/EEF1AKMT3/EEF1AKMT2/NSD3/NSD2/CSKMT                                        |
| Biological Process | GO:0010743 | regulation of macrophage derived foam cell differentiation                              | 7/2279  | 32/18866  | 0.083449  | 0.4275745 | 0.3868846 | 7  | PPARG/ABCG1/PRKCH/NR1H2/ITGB3/ABCA1/AGTR1                                                                                                                                                                                                                                                                                                           |
| Biological Process | GO:0010880 | regulation of release of sequestered calcium ion into cytosol by sarcoplasmic reticulum | 7/2279  | 32/18866  | 0.083449  | 0.4275745 | 0.3868846 | 7  | PDE4D/CASQ2/CACNA1C/SLC8A1/GSTO1/ANK2/CASQ1                                                                                                                                                                                                                                                                                                         |
| Biological Process | GO:0030201 | heparan sulfate proteoglycan metabolic process                                          | 7/2279  | 32/18866  | 0.083449  | 0.4275745 | 0.3868846 | 7  | CSGALNACT1/HS3ST3B1/DSE/NDST1/TCF7L2/XYLT1/PXYLP1                                                                                                                                                                                                                                                                                                   |
| Biological Process | GO:0044818 | mitotic G2/M transition checkpoint                                                      | 7/2279  | 32/18866  | 0.083449  | 0.4275745 | 0.3868846 | 7  | TRIM39/BLM/FOXN3/HUS1/TAOK3/CLSPN/NAE1                                                                                                                                                                                                                                                                                                              |
| Biological Process | GO:0050849 | negative regulation of calcium-mediated signaling                                       | 7/2279  | 32/18866  | 0.083449  | 0.4275745 | 0.3868846 | 7  | CASQ2/ITPR1/RCAN1/DYRK2/GSTO1/FHL2/SLA2                                                                                                                                                                                                                                                                                                             |
| Biological Process | GO:0032259 | methylation                                                                             | 54/2279 | 371/18866 | 0.0836808 | 0.4275745 | 0.3868846 | 54 | PIWIL4/GFI1/BRD4/THADA/METTL21A/MOV10L1/MYB/PRMT2/ASH2L/SNRPD3/SETD2/GATAD2A/SMYD3/COMT/EHMT2/WDR82/PAX7/METTL6/KMT2D/KDM1B/TPMT/ATF7IP/KDM4C/SETD1B/PRDM2/GRHL2/SETD1A/CREBBP/TET2/MTA2/ZNF335/METTL22/PRDM16/PHF19/DNMT1/GSTO1/PIH1D1/MAT1A/SMYD4/MORC1/RBM15B/DYDC2/DYDC1/NTMT1/FBL/HNMT/MECOM/METTL8/PAXIP1/EEF1AKMT3/EEF1AKMT2/NSD3/NSD2/CSKMT |
| Biological Process | GO:0006767 | water-soluble vitamin metabolic process                                                 | 15/2279 | 85/18866  | 0.0838611 | 0.4275745 | 0.3868846 | 15 | ABCC1/MTHFD1L/MTHFS/PC/SLC19A1/CD320/PDXK/MTHFD1/GSTO1/SLC52A2/SLC2A1/GSTO2/SLC23A1/AOX1/ACP3                                                                                                                                                                                                                                                       |

|                    |            |                                                        |         |           |           |           |           |    |                                                                                                                                                                                                                                                                                                                                                                  |
|--------------------|------------|--------------------------------------------------------|---------|-----------|-----------|-----------|-----------|----|------------------------------------------------------------------------------------------------------------------------------------------------------------------------------------------------------------------------------------------------------------------------------------------------------------------------------------------------------------------|
| Biological Process | GO:0030101 | natural killer cell activation                         | 15/2279 | 85/18866  | 0.0838611 | 0.4275745 | 0.3868846 | 15 | PIK3CD/FGR/SNX27/SLAMF7/DCAF15/RAB27A/HLA-F/NCR1/SP3/PGLYRP1/PTPRC/ITGB2/IL18R1/TYRO3/KAT7                                                                                                                                                                                                                                                                       |
| Biological Process | GO:0032092 | positive regulation of protein binding                 | 15/2279 | 85/18866  | 0.0838611 | 0.4275745 | 0.3868846 | 15 | MARK3/AMFR/ARRB1/HIPK2/APP/TCF7L2/RAPGEF2/CSF3/STK3/SPTA1/PLCL1/ADD1/FLOT1/STING1/PRKN                                                                                                                                                                                                                                                                           |
| Biological Process | GO:0060537 | muscle tissue development                              | 59/2279 | 409/18866 | 0.083902  | 0.4275745 | 0.3868846 | 59 | HDAC4/ZFPM1/RXRA/CALR/CTDP1/MYO18B/TTN/CREB1/MEF2D/MIR143/MIR145/MYH11/AKAP13/SKI/MAML1/MYLK/SMAD3/SLC8A1/MIR199A1/GJA5/VGLL4/CCM2L/TGFBR2/MYH15/DLL1/RIPK1/RBPJ/MIR24-2/MIR23A/IFRD1/SMAD7/FGFR1/PAX7/TGFB1/IGSF8/VAMP5/SVIL/RARA/NF1/ENG/ARRB2/ARNTL/MYOM1/ANKRD2/RB1/MEIS1/BCL2/MIR199A2/NOTCH1/MEF2C/FHL2/HLX/PDGFRB/ANKRD1/FLOT1/ALDH1A2/CASQ1/PRKAA1/MYORG |
| Biological Process | GO:0055088 | lipid homeostasis                                      | 26/2279 | 163/18866 | 0.0840476 | 0.4275745 | 0.3868846 | 26 | PNPLA2/EHD1/PPARG/NR1I2/THADA/C1QTNF3/LRP5L/LIPC/VDR/ORMDL3/ABCG1/ACOXL/RTN4/ASGR2/MED13/NR1H2/ABCA1/ACOX2/NPC1/ACACA/USF2/ABHD5/NR5A2/RALY/PRKAA1/ANGPTL8                                                                                                                                                                                                       |
| Biological Process | GO:0033044 | regulation of chromosome organization                  | 52/2279 | 356/18866 | 0.084069  | 0.4275745 | 0.3868846 | 52 | GFI1/BRD4/MAD1L1/TNKS/MYB/SKI/HMBOX1/RMI2/ARRB1/RTKL1/NSMCE2/C6orf89/YLPM1/PADI2/CUL3/OTUB2/CDC16/RPS6KA4/SPHK2/ZBTB7B/PAX7/CTBP1/TACC3/ATF7IP/KDM4C/MCM2/SETD1A/SMG6/NUMA1/ZNF335/NEK6/PHF19/OTUB1/RB1/DNMT1/PIH1D1/CDCA5/ANAPC7/TRIP12/ERCC1/HECW2/SREBF1/SLX4/RNF40/KAT7/PARP10/CCT6A/LIF/PCID2/PAXIP1/NSD3/SLF1                                              |
| Biological Process | GO:0003333 | amino acid transmembrane transport                     | 16/2279 | 92/18866  | 0.0844119 | 0.4275745 | 0.3868846 | 16 | SLC38A4/SLC38A10/SLC1A5/SLC15A4/LRRC8C/SLC43A2/SLC1A2/SLC7A7/SLC7A5/SLC1A6/PER2/SLC36A3/SLC1A3/SLC43A1/SLC7A8/SLC7A1                                                                                                                                                                                                                                             |
| Biological Process | GO:0002726 | positive regulation of T cell cytokine production      | 5/2279  | 20/18866  | 0.0845119 | 0.4275745 | 0.3868846 | 5  | PRKCZ/NLRP3/IL1R1/TRAF2/IL18R1                                                                                                                                                                                                                                                                                                                                   |
| Biological Process | GO:0002827 | positive regulation of T-helper 1 type immune response | 5/2279  | 20/18866  | 0.0845119 | 0.4275745 | 0.3868846 | 5  | SLC11A1/IL1R1/CCR2/IL18R1/HLX                                                                                                                                                                                                                                                                                                                                    |
| Biological Process | GO:0002902 | regulation of B cell apoptotic process                 | 5/2279  | 20/18866  | 0.0845119 | 0.4275745 | 0.3868846 | 5  | FOXP1/IL10/HS2D/BLK/BCL10                                                                                                                                                                                                                                                                                                                                        |

|                    |            |                                                                   |        |          |           |           |           |   |                                   |
|--------------------|------------|-------------------------------------------------------------------|--------|----------|-----------|-----------|-----------|---|-----------------------------------|
| Biological Process | GO:0007252 | I-kappaB phosphorylation                                          | 5/2279 | 20/18866 | 0.0845119 | 0.4275745 | 0.3868846 | 5 | TNF/TRAF2/TLR9/ERC1/CX3CR1        |
| Biological Process | GO:0008090 | retrograde axonal transport                                       | 5/2279 | 20/18866 | 0.0845119 | 0.4275745 | 0.3868846 | 5 | DYNC1H1/KIF1B/MAP1A/FBXW11/NDEL1  |
| Biological Process | GO:0010878 | cholesterol storage                                               | 5/2279 | 20/18866 | 0.0845119 | 0.4275745 | 0.3868846 | 5 | EHD1/PPARG/ABCG1/NR1H2/ABCA1      |
| Biological Process | GO:0032634 | interleukin-5 production                                          | 5/2279 | 20/18866 | 0.0845119 | 0.4275745 | 0.3868846 | 5 | PRKCZ/PDE4D/NLRP3/TNFRSF21/RARA   |
| Biological Process | GO:0034315 | regulation of Arp2/3 complex-mediated actin nucleation            | 5/2279 | 20/18866 | 0.0845119 | 0.4275745 | 0.3868846 | 5 | WASL/GMFB/NCKAP1/CYFIP1/GMFG      |
| Biological Process | GO:0043931 | ossification involved in bone maturation                          | 5/2279 | 20/18866 | 0.0845119 | 0.4275745 | 0.3868846 | 5 | XYLT1/SEMA4D/LTF/ANO6/RFLNA       |
| Biological Process | GO:0060546 | negative regulation of necroptotic process                        | 5/2279 | 20/18866 | 0.0845119 | 0.4275745 | 0.3868846 | 5 | MIR101-2/RIPK1/ARHGEF2/FADD/PELI1 |
| Biological Process | GO:0062099 | negative regulation of programmed necrotic cell death             | 5/2279 | 20/18866 | 0.0845119 | 0.4275745 | 0.3868846 | 5 | MIR101-2/RIPK1/ARHGEF2/FADD/PELI1 |
| Biological Process | GO:0071636 | positive regulation of transforming growth factor beta production | 5/2279 | 20/18866 | 0.0845119 | 0.4275745 | 0.3868846 | 5 | CREB1/MYB/SMAD3/THBS1/WNT11       |

|                    |            |                                                                                                   |        |          |           |           |           |   |                                            |
|--------------------|------------|---------------------------------------------------------------------------------------------------|--------|----------|-----------|-----------|-----------|---|--------------------------------------------|
| Biological Process | GO:0097503 | sialylation                                                                                       | 5/2279 | 20/18866 | 0.0845119 | 0.4275745 | 0.3868846 | 5 | ST6GALNAC1/ST6GAL1/ST8SIA6/ST3GAL4/ST3GAL2 |
| Biological Process | GO:1902004 | positive regulation of amyloid-beta formation                                                     | 5/2279 | 20/18866 | 0.0845119 | 0.4275745 | 0.3868846 | 5 | TNF/ABCG1/APP/CLU/RELA                     |
| Biological Process | GO:0002315 | marginal zone B cell differentiation                                                              | 3/2279 | 9/18866  | 0.0845647 | 0.4275745 | 0.3868846 | 3 | DLL1/DOCK10/BCL3                           |
| Biological Process | GO:0002370 | natural killer cell cytokine production                                                           | 3/2279 | 9/18866  | 0.0845647 | 0.4275745 | 0.3868846 | 3 | CD226/HLA-F/CD96                           |
| Biological Process | GO:0002480 | antigen processing and presentation of exogenous peptide antigen via MHC class I, TAP-independent | 3/2279 | 9/18866  | 0.0845647 | 0.4275745 | 0.3868846 | 3 | LNPEP/HLA-C/HLA-F                          |
| Biological Process | GO:0002634 | regulation of germinal center formation                                                           | 3/2279 | 9/18866  | 0.0845647 | 0.4275745 | 0.3868846 | 3 | TNFAIP3/TNFSF13B/MEF2C                     |
| Biological Process | GO:0002692 | negative regulation of cellular extravasation                                                     | 3/2279 | 9/18866  | 0.0845647 | 0.4275745 | 0.3868846 | 3 | ABR/BCR/PLCB1                              |
| Biological Process | GO:0002727 | regulation of natural killer cell cytokine production                                             | 3/2279 | 9/18866  | 0.0845647 | 0.4275745 | 0.3868846 | 3 | CD226/HLA-F/CD96                           |
| Biological Process | GO:0006013 | mannose metabolic process                                                                         | 3/2279 | 9/18866  | 0.0845647 | 0.4275745 | 0.3868846 | 3 | HK1/PMM2/MAN2C1                            |

|                    |            |                                                        |        |         |           |           |           |   |                         |
|--------------------|------------|--------------------------------------------------------|--------|---------|-----------|-----------|-----------|---|-------------------------|
| Biological Process | GO:0006651 | diacylglycerol biosynthetic process                    | 3/2279 | 9/18866 | 0.0845647 | 0.4275745 | 0.3868846 | 3 | PNPLA2/PLA2G15/AVIL     |
| Biological Process | GO:0006681 | galactosylceramide metabolic process                   | 3/2279 | 9/18866 | 0.0845647 | 0.4275745 | 0.3868846 | 3 | GALC/B4GALT3/FA2H       |
| Biological Process | GO:0009157 | deoxyribonucleoside monophosphate biosynthetic process | 3/2279 | 9/18866 | 0.0845647 | 0.4275745 | 0.3868846 | 3 | TK2/DCTD/TK1            |
| Biological Process | GO:0010637 | negative regulation of mitochondrial fusion            | 3/2279 | 9/18866 | 0.0845647 | 0.4275745 | 0.3868846 | 3 | VAT1/DNM1L/PRKN         |
| Biological Process | GO:0010911 | regulation of isomerase activity                       | 3/2279 | 9/18866 | 0.0845647 | 0.4275745 | 0.3868846 | 3 | UHRF1/ITGB2/NOD2        |
| Biological Process | GO:0010912 | positive regulation of isomerase activity              | 3/2279 | 9/18866 | 0.0845647 | 0.4275745 | 0.3868846 | 3 | UHRF1/ITGB2/NOD2        |
| Biological Process | GO:0016102 | diterpenoid biosynthetic process                       | 3/2279 | 9/18866 | 0.0845647 | 0.4275745 | 0.3868846 | 3 | DHRS9/RDH10/ALDH1A2     |
| Biological Process | GO:0021603 | cranial nerve formation                                | 3/2279 | 9/18866 | 0.0845647 | 0.4275745 | 0.3868846 | 3 | PHOX2A/ATP8B1/PAX2      |
| Biological Process | GO:0030210 | heparin biosynthetic process                           | 3/2279 | 9/18866 | 0.0845647 | 0.4275745 | 0.3868846 | 3 | CSGALNACT1/ANGPT1/NDST1 |

|                    |            |                                                                      |        |         |           |           |           |   |                      |
|--------------------|------------|----------------------------------------------------------------------|--------|---------|-----------|-----------|-----------|---|----------------------|
| Biological Process | GO:0031666 | positive regulation of lipopolysaccharide-mediated signaling pathway | 3/2279 | 9/18866 | 0.0845647 | 0.4275745 | 0.3868846 | 3 | PRKCA/SCIMP/LY86     |
| Biological Process | GO:0034145 | positive regulation of toll-like receptor 4 signaling pathway        | 3/2279 | 9/18866 | 0.0845647 | 0.4275745 | 0.3868846 | 3 | WDFY1/LTF/PELI1      |
| Biological Process | GO:0048539 | bone marrow development                                              | 3/2279 | 9/18866 | 0.0845647 | 0.4275745 | 0.3868846 | 3 | LRP5L/PTPRC/LRRC17   |
| Biological Process | GO:0048702 | embryonic neurocranium morphogenesis                                 | 3/2279 | 9/18866 | 0.0845647 | 0.4275745 | 0.3868846 | 3 | MTHFD1L/NDST1/MTHFD1 |
| Biological Process | GO:0048845 | venous blood vessel morphogenesis                                    | 3/2279 | 9/18866 | 0.0845647 | 0.4275745 | 0.3868846 | 3 | CCM2/ENG/NOTCH1      |
| Biological Process | GO:0050847 | progesterone receptor signaling pathway                              | 3/2279 | 9/18866 | 0.0845647 | 0.4275745 | 0.3868846 | 3 | PHB/UBE3A/NEDD4      |
| Biological Process | GO:0051643 | endoplasmic reticulum localization                                   | 3/2279 | 9/18866 | 0.0845647 | 0.4275745 | 0.3868846 | 3 | MYO5A/ESYT1/GRAMD2A  |
| Biological Process | GO:0060155 | platelet dense granule organization                                  | 3/2279 | 9/18866 | 0.0845647 | 0.4275745 | 0.3868846 | 3 | ABCA1/F2R/DTNBP1     |
| Biological Process | GO:0060179 | male mating behavior                                                 | 3/2279 | 9/18866 | 0.0845647 | 0.4275745 | 0.3868846 | 3 | HDAC4/HEXB/NCOA1     |

|                    |            |                                                            |        |         |           |           |           |   |                     |
|--------------------|------------|------------------------------------------------------------|--------|---------|-----------|-----------|-----------|---|---------------------|
| Biological Process | GO:0060556 | regulation of vitamin D biosynthetic process               | 3/2279 | 9/18866 | 0.0845647 | 0.4275745 | 0.3868846 | 3 | GFI1/VDR/TNF        |
| Biological Process | GO:0061744 | motor behavior                                             | 3/2279 | 9/18866 | 0.0845647 | 0.4275745 | 0.3868846 | 3 | DCTN1/MFSD2A/PRKAA1 |
| Biological Process | GO:0062042 | regulation of cardiac epithelial to mesenchymal transition | 3/2279 | 9/18866 | 0.0845647 | 0.4275745 | 0.3868846 | 3 | TGFBR2/ENG/NOTCH1   |
| Biological Process | GO:0071316 | cellular response to nicotine                              | 3/2279 | 9/18866 | 0.0845647 | 0.4275745 | 0.3868846 | 3 | TNF/NTRK1/RELA      |
| Biological Process | GO:0097119 | postsynaptic density protein 95 clustering                 | 3/2279 | 9/18866 | 0.0845647 | 0.4275745 | 0.3868846 | 3 | ZMYND8/NRXN1/NRXN2  |
| Biological Process | GO:0099159 | regulation of modification of postsynaptic structure       | 3/2279 | 9/18866 | 0.0845647 | 0.4275745 | 0.3868846 | 3 | ITSN1/BAIAP2/CYFIP1 |
| Biological Process | GO:1901164 | negative regulation of trophoblast cell migration          | 3/2279 | 9/18866 | 0.0845647 | 0.4275745 | 0.3868846 | 3 | CALR/ARHGDI1/NODAL  |
| Biological Process | GO:1903753 | negative regulation of p38MAPK cascade                     | 3/2279 | 9/18866 | 0.0845647 | 0.4275745 | 0.3868846 | 3 | MIR138-2/CYLD/EZR   |
| Biological Process | GO:1903867 | extraembryonic membrane development                        | 3/2279 | 9/18866 | 0.0845647 | 0.4275745 | 0.3868846 | 3 | E2F7/DNAJB6/PAXIP1  |



|                    |            |                                                                           |         |           |           |           |           |    |                                                                                                                 |
|--------------------|------------|---------------------------------------------------------------------------|---------|-----------|-----------|-----------|-----------|----|-----------------------------------------------------------------------------------------------------------------|
| Biological Process | GO:1904153 | negative regulation of retrograde protein transport, ER to cytosol        | 3/2279  | 9/18866   | 0.0845647 | 0.4275745 | 0.3868846 | 3  | UBAC2/DERL2/SVIP                                                                                                |
| Biological Process | GO:0002708 | positive regulation of lymphocyte mediated immunity                       | 18/2279 | 106/18866 | 0.0846346 | 0.4275745 | 0.3868846 | 18 | PRKCZ/NLRP3/IL1R1/TNF/TRAF2/CD226/HLA-F/TGFB1/PTPRC/IL18RAP/TP53BP1/IL18R1/TNFSF13/CADM1/FADD/PAXIP1/CYRIB/NSD2 |
| Biological Process | GO:0051817 | modulation of process of other organism involved in symbiotic interaction | 17/2279 | 99/18866  | 0.0846508 | 0.4275745 | 0.3868846 | 17 | RXRA/CTDP1/ULK1/CCL5/CSF1R/SFTPD/HIPK2/HDAC1/PC/PABPN1/PHB/AQP1/TNIP1/LTF/BCL2L1/CPSF4/PRKN                     |
| Biological Process | GO:0007566 | embryo implantation                                                       | 11/2279 | 58/18866  | 0.0848874 | 0.4275745 | 0.3868846 | 11 | BSG/RXRA/CALR/FUT7/ARHGDI1B/TGFBR2/AGO2/VMP1/TPPP3/NODAL/LIF                                                    |
| Biological Process | GO:0000188 | inactivation of MAPK activity                                             | 6/2279  | 26/18866  | 0.0851909 | 0.4275745 | 0.3868846 | 6  | SPRED2/DUSP14/LAX1/PPP2R1A/RGS3/DUSP3                                                                           |
| Biological Process | GO:0002068 | glandular epithelial cell development                                     | 6/2279  | 26/18866  | 0.0851909 | 0.4275745 | 0.3868846 | 6  | RHEB/RFX3/DLL1/RARA/RARG/ARNTL                                                                                  |
| Biological Process | GO:0003081 | regulation of systemic arterial blood pressure by renin-angiotensin       | 6/2279  | 26/18866  | 0.0851909 | 0.4275745 | 0.3868846 | 6  | CTSZ/CTSG/GJA5/F2R/AGTR1/AOPEP                                                                                  |
| Biological Process | GO:0007064 | mitotic sister chromatid cohesion                                         | 6/2279  | 26/18866  | 0.0851909 | 0.4275745 | 0.3868846 | 6  | TNKS/NSMCE2/RB1/RAD21L1/CDCA5/SLF1                                                                              |
| Biological Process | GO:0030206 | chondroitin sulfate biosynthetic process                                  | 6/2279  | 26/18866  | 0.0851909 | 0.4275745 | 0.3868846 | 6  | CSGALNACT1/DSE/CHSY1/CHST11/CHST15/XYL1                                                                         |

|                    |            |                                                                 |        |          |           |           |           |   |                                           |
|--------------------|------------|-----------------------------------------------------------------|--------|----------|-----------|-----------|-----------|---|-------------------------------------------|
| Biological Process | GO:0032967 | positive regulation of collagen biosynthetic process            | 6/2279 | 26/18866 | 0.0851909 | 0.4275745 | 0.3868846 | 6 | MYB/TGFB1/ENG/ARRB2/F2R/PDGFRB            |
| Biological Process | GO:0036315 | cellular response to sterol                                     | 6/2279 | 26/18866 | 0.0851909 | 0.4275745 | 0.3868846 | 6 | GPLD1/MLC1/ABCA1/GRAMD1A/HMGCS1/INHBA     |
| Biological Process | GO:0042832 | defense response to protozoan                                   | 6/2279 | 26/18866 | 0.0851909 | 0.4275745 | 0.3868846 | 6 | IRF8/IL10/LYST/SLC11A1/CCDC88B/BCL3       |
| Biological Process | GO:0043951 | negative regulation of cAMP-mediated signaling                  | 6/2279 | 26/18866 | 0.0851909 | 0.4275745 | 0.3868846 | 6 | PDE4D/MGRN1/GNAI2/MRAP/CRTC3/PDE3B        |
| Biological Process | GO:0048643 | positive regulation of skeletal muscle tissue development       | 6/2279 | 26/18866 | 0.0851909 | 0.4275745 | 0.3868846 | 6 | DLL1/ARNTL/BCL2/MEF2C/FLOT1/PRKAA1        |
| Biological Process | GO:0051350 | negative regulation of lyase activity                           | 6/2279 | 26/18866 | 0.0851909 | 0.4275745 | 0.3868846 | 6 | CCR2/GNAI2/AKAP5/LTB4R2/PALM/GABBR2       |
| Biological Process | GO:0060561 | apoptotic process involved in morphogenesis                     | 6/2279 | 26/18866 | 0.0851909 | 0.4275745 | 0.3868846 | 6 | TNFRSF1B/VDR/TNFRSF1A/PAX2/NOTCH1/PPP2R1B |
| Biological Process | GO:0060706 | cell differentiation involved in embryonic placenta development | 6/2279 | 26/18866 | 0.0851909 | 0.4275745 | 0.3868846 | 6 | SPINT2/E2F7/DNAJB6/STK3/GRHL2/LIF         |
| Biological Process | GO:0090025 | regulation of monocyte chemotaxis                               | 6/2279 | 26/18866 | 0.0851909 | 0.4275745 | 0.3868846 | 6 | CCR2/CCL5/FPR2/DEFB124/CXCL17/ANO6        |

|                    |            |                                                                                                              |         |           |           |           |           |    |                                                                                                                                                                                                                                                                                                                                                                           |
|--------------------|------------|--------------------------------------------------------------------------------------------------------------|---------|-----------|-----------|-----------|-----------|----|---------------------------------------------------------------------------------------------------------------------------------------------------------------------------------------------------------------------------------------------------------------------------------------------------------------------------------------------------------------------------|
| Biological Process | GO:1900739 | regulation of protein insertion into mitochondrial membrane involved in apoptotic signaling pathway          | 6/2279  | 26/18866  | 0.0851909 | 0.4275745 | 0.3868846 | 6  | TFDP1/YWHAH/YWHAZ/BCL2/TP53BP2/YWHAQ                                                                                                                                                                                                                                                                                                                                      |
| Biological Process | GO:1900740 | positive regulation of protein insertion into mitochondrial membrane involved in apoptotic signaling pathway | 6/2279  | 26/18866  | 0.0851909 | 0.4275745 | 0.3868846 | 6  | TFDP1/YWHAH/YWHAZ/BCL2/TP53BP2/YWHAQ                                                                                                                                                                                                                                                                                                                                      |
| Biological Process | GO:1905523 | positive regulation of macrophage migration                                                                  | 6/2279  | 26/18866  | 0.0851909 | 0.4275745 | 0.3868846 | 6  | C3AR1/CCL5/CSF1R/THBS1/CXCL17/CX3CR1                                                                                                                                                                                                                                                                                                                                      |
| Biological Process | GO:0009615 | response to virus                                                                                            | 51/2279 | 349/18866 | 0.0858581 | 0.4298823 | 0.3889727 | 51 | AZU1/IL27/ENO1/AIM2/TRIM38/HNRNPUL1/IRF5/LCN2/LYST/URI1/NLRP3/SETD2/FGR/TNF/TNFAIP3/CCL5/TLR9/SPON2/ODC1/CRCP/CLU/PHB/RIPK3/TRIM5/AGBL5/SEC14L1/PTPRC/CHRM2/NLRC5/ZDHHC1/MAP3K14/POU2F2/BCL2/TRAF3IP2/DDX41/BCL2L1/ILF3/MX1/IRF2/RELA/BCL3/BANF1/HERC5/PARP9/CCL22/ISG20/FADD/STING1/SHFL/NCBP3/ILRUN                                                                     |
| Biological Process | GO:0050727 | regulation of inflammatory response                                                                          | 61/2279 | 425/18866 | 0.0862051 | 0.4298823 | 0.3889727 | 61 | ELANE/S100A8/BRD4/ABR/FOXP1/SBNO2/FUT7/MGLL/IL10/PPARG/IL16/C1QTNF3/MIR140/ABCC1/MIR145/PIK3AP1/TNFRSF1B/NLRP3/GGT1/IL1R1/CCR2/SMAD3/MEFV/TNF/SMPD L3B/TNFAIP3/CCL5/AOAH/FPR2/TLR9/RIPK1/TNFAIP6/TNFRSF1A/F12/FANCA/CXCL17/PGLYRP1/TNIP1/GHRL/PTPRC/MGST2/GRN/BCR/CNR2/ETS1/MIR138-2/DNASE1L3/NOD2/RB1/PER1/BCL6B/PLD3/CASP1/GPR4/CEBPB/AGTR1/CYLD/TYRO3/RELA/STING1/CCN4 |
| Biological Process | GO:0048771 | tissue remodeling                                                                                            | 28/2279 | 178/18866 | 0.086291  | 0.4298823 | 0.3889727 | 28 | ABR/DEF8/MIR143/INPP5D/LRP5L/CRB1/VDR/CCR2/PRKCA/MIR199A1/UBASH3B/TNFAIP3/CSF1R/GJA5/RBPJ/TGFB1/NF1/LRRK1/ITGB3/TMEM64/CSK/BCR/PLEKHM1/MIR199A2/MEF2C/EPAS1/F2R/LIF                                                                                                                                                                                                       |
| Biological Process | GO:0014002 | astrocyte development                                                                                        | 9/2279  | 45/18866  | 0.0863263 | 0.4298823 | 0.3889727 | 9  | S100A8/TNF/FPR2/EIF2B5/DLL1/APP/NF1/GRN/TSPAN2                                                                                                                                                                                                                                                                                                                            |
| Biological Process | GO:0031057 | negative regulation of histone modification                                                                  | 9/2279  | 45/18866  | 0.0863263 | 0.4298823 | 0.3889727 | 9  | SKI/OTUB2/SPHK2/CTBP1/KDM4C/OTUB1/DNMT1/PIH1D1/TRIP12                                                                                                                                                                                                                                                                                                                     |
| Biological Process | GO:0042771 | intrinsic apoptotic signaling pathway in response to DNA damage by p53 class mediator                        | 9/2279  | 45/18866  | 0.0863263 | 0.4298823 | 0.3889727 | 9  | BRCA2/HIPK2/ZNF385A/CDIP1/DYRK2/BCL2/CHEK2/BCL3/MARCHF7                                                                                                                                                                                                                                                                                                                   |

|                    |            |                                                |         |           |           |           |           |    |                                                                                                                                                                                                                                                                                                                                                                                              |
|--------------------|------------|------------------------------------------------|---------|-----------|-----------|-----------|-----------|----|----------------------------------------------------------------------------------------------------------------------------------------------------------------------------------------------------------------------------------------------------------------------------------------------------------------------------------------------------------------------------------------------|
| Biological Process | GO:0051293 | establishment of spindle localization          | 9/2279  | 45/18866  | 0.0863263 | 0.4298823 | 0.3889727 | 9  | DCTN1/NDE1/DYNC1H1/MYH9/HTT/NUMA1/ARHGEF2/FBXW11/NDEL1                                                                                                                                                                                                                                                                                                                                       |
| Biological Process | GO:0060412 | ventricular septum morphogenesis               | 9/2279  | 45/18866  | 0.0863263 | 0.4298823 | 0.3889727 | 9  | ZFPM1/GJA5/TGFBR2/RBPJ/SMAD7/WNT11/NOTCH1/SLIT3/NSD2                                                                                                                                                                                                                                                                                                                                         |
| Biological Process | GO:0070266 | necroptotic process                            | 9/2279  | 45/18866  | 0.0863263 | 0.4298823 | 0.3889727 | 9  | TNF/MIR101-2/RIPK1/RIPK3/DNM1L/ARHGEF2/CYLD/FADD/PELI1                                                                                                                                                                                                                                                                                                                                       |
| Biological Process | GO:0090311 | regulation of protein deacetylation            | 9/2279  | 45/18866  | 0.0863263 | 0.4298823 | 0.3889727 | 9  | SPRED2/SKI/C6orf89/SPHK2/ZBTB7B/CTBP1/NEK3/SREBF1/PRKAA1                                                                                                                                                                                                                                                                                                                                     |
| Biological Process | GO:0007568 | aging                                          | 47/2279 | 319/18866 | 0.0863767 | 0.4298823 | 0.3889727 | 47 | PDE4D/TIMP2/MPO/CALR/FZR1/IL10/GSN/MAP3K3/CREB1/BRCA2/INPP5D/TNFRSF1B/AMFR/COL4A2/NSMCE2/EIF2B5/TGFBR2/DDC/AKT3/APP/ILK/ZMIZ1/PAX2/LITAF/ENO3/SLC1A2/PRDM2/CAT/NFE2L2/ENG/ITGB2/VASH1/ARNTL/NEK6/NTRK1/MORC3/BCL2/FOXO1/GLRX2/CHEK2/CD68/PDGFRB/ERCC1/SREBF1/RELA/ERCC2/SIRT3                                                                                                                |
| Biological Process | GO:0016052 | carbohydrate catabolic process                 | 31/2279 | 200/18866 | 0.0865617 | 0.4298823 | 0.3889727 | 31 | FUT4/FOXK1/HDAC4/PRKAG2/ENO1/FUT7/HK1/HEXB/PFKFB4/RAE1/AOAH/MGAM/CBFA2T3/CHIT1/DHTKD1/APP/OGDH/ADPGK/ENOSF1/PGAM1/GLYCTK/NUP93/ENO3/HK2/SEC13/PPP1CB/ESRRB/PKM/MAN2C1/PFKFB3/PRKAA1                                                                                                                                                                                                          |
| Biological Process | GO:0045604 | regulation of epidermal cell differentiation   | 12/2279 | 65/18866  | 0.087315  | 0.4298823 | 0.3889727 | 12 | RUNX1/VDR/DLL1/PRKCH/GRHL2/NUMA1/KLF7/SGPP1/NOTCH1/AQP3/ZBED2/MACROH2A2                                                                                                                                                                                                                                                                                                                      |
| Biological Process | GO:0062012 | regulation of small molecule metabolic process | 65/2279 | 456/18866 | 0.0875591 | 0.4298823 | 0.3889727 | 65 | MAEA/FOXK1/HDAC4/PRKAG2/GFI1/CDA/RVFN/ENO1/AP2A1/PPARG/NCOR2/C1QTNF3/MFSD2A/IDI1/PFKFB4/VDR/RAE1/MBTPS1/GPLD1/TNF/ABCG1/CBFA2T3/PGP/ODC1/COMT/APP/PGAM1/P2RY6/SPHK2/TGFB1/RDH10/HRH1/DGKQ/POR/NUP93/DYRK2/NR1H2/SLC7A7/SEC13/CD320/GNB3/ACACB/PSMF1/PDGFB/PPP1CB/ESRRB/PSMB7/ACACA/PRKCE/LMF1/FOXO1/NCOA2/HMGCS1/SCD/SOGA1/SREBF1/WDTC1/CPT1A/PFKFB3/PSMD13/ACADVL/PRKAA1/PRKN/SDHAF3/RUBCNL |
| Biological Process | GO:0007584 | response to nutrient                           | 27/2279 | 171/18866 | 0.0876143 | 0.4298823 | 0.3889727 | 27 | PPARG/GSN/ACSL1/TNKS/VDR/SLC8A1/TGFBR2/ALPL/GNAI2/RARA/POR/GIPR/ABCA1/NCOA1/CAT/ARSB/SLC16A1/NOD2/PKM/AQP3/HMGCL/USF2/ERCC1/HMGCS1/RELA/ALDH1A2/SST                                                                                                                                                                                                                                          |

|                    |            |                                                                                  |         |           |           |           |           |    |                                                                                                                                                                                                                                                                                                                             |
|--------------------|------------|----------------------------------------------------------------------------------|---------|-----------|-----------|-----------|-----------|----|-----------------------------------------------------------------------------------------------------------------------------------------------------------------------------------------------------------------------------------------------------------------------------------------------------------------------------|
| Biological Process | GO:0030856 | regulation of epithelial cell differentiation                                    | 27/2279 | 171/18866 | 0.0876143 | 0.4298823 | 0.3889727 | 27 | SPRED2/RUNX1/VDR/RHEB/TNF/ZEB2/RFX3/DLL1/TNFRSF1A/PAX2/PRKCH/WWTR1/GRHL2/NUMA1/KLF7/ARNTL/SGPP1/ADD1/NOTCH1/AQP3/S1PR2/NOTCH4/CEBPB/ZBED2/NODAL/LIF/MACROH2A2                                                                                                                                                               |
| Biological Process | GO:0051302 | regulation of cell division                                                      | 27/2279 | 171/18866 | 0.0876143 | 0.4298823 | 0.3889727 | 27 | BLM/TGFA/MIR145/BRCA2/ITGB1BP1/SETD2/KIF13A/LBH/E2F7/CUL3/GIT1/DLL1/UVRAG/TGFB1/SVIL/CSPP1/PDGFD/C10orf99/PDGFB/CAT/ZFYVE19/ESRRB/KLHL21/PRKCE/PDGFC/BCL2L1/CDC14A                                                                                                                                                          |
| Biological Process | GO:0071560 | cellular response to transforming growth factor beta stimulus                    | 38/2279 | 252/18866 | 0.0876473 | 0.4298823 | 0.3889727 | 38 | LRG1/PRKCZ/LTBP1/SPRED2/CREB1/SKI/TGFBRAP1/SMAD3/COL4A2/LDLRAD4/DNM2/HIPK2/DUSP22/CHST11/TGFB2/THBS1/MIR27A/SMAD7/PXN/ZMIZ1/ITGB5/TGFB1/SMURF1/PDGFD/TGFB111/HTRA4/CREBBP/ENG/ARRB2/PRDM16/ARHGEF18/GCNT2/MEF2C/HTRA3/ANKRD1/NODAL/ZFYVE9/CX3CR1                                                                            |
| Biological Process | GO:0043281 | regulation of cysteine-type endopeptidase activity involved in apoptotic process | 33/2279 | 215/18866 | 0.0877993 | 0.4298823 | 0.3889727 | 33 | NLRC4/S100A8/GRAMD4/PPARG/GSN/RPS6KA1/LCK/NLRP3/SMAD3/ARRB1/TNF/TRAF2/MICAL1/CTSD/THBS1/CTSH/RIPK1/PAX2/AQP1/POR/DNAJB6/BCL10/ATP2A3/NOL3/ARRB2/FIS1/PIH1D1/P2RX1/F2R/CASP1/BCL2L13/NODAL/FADD                                                                                                                              |
| Biological Process | GO:0009123 | nucleoside monophosphate metabolic process                                       | 13/2279 | 72/18866  | 0.0890083 | 0.4298823 | 0.3889727 | 13 | AMPD3/TJP2/TK2/UCK2/GUK1/AK2/GMPR2/AK5/LHPP/DCTD/DHODH/TK1/IMPDH1                                                                                                                                                                                                                                                           |
| Biological Process | GO:0033047 | regulation of mitotic sister chromatid segregation                               | 13/2279 | 72/18866  | 0.0890083 | 0.4298823 | 0.3889727 | 13 | MAD1L1/TNKS/NSMCE2/CUL3/CDC16/TACC3/NUMA1/NEK6/RB1/ANAPC7/HECW2/PCID2/SLF1                                                                                                                                                                                                                                                  |
| Biological Process | GO:0045600 | positive regulation of fat cell differentiation                                  | 13/2279 | 72/18866  | 0.0890083 | 0.4298823 | 0.3889727 | 13 | RREB1/PPARG/CREB1/SH3PXD2B/ZBTB16/ZNF385A/ZBTB7B/TMEM64/WNT5B/STK3/AAMDC/PRDM16/CEBPB                                                                                                                                                                                                                                       |
| Biological Process | GO:0014013 | regulation of gliogenesis                                                        | 21/2279 | 128/18866 | 0.08901   | 0.4298823 | 0.3889727 | 21 | PPARG/CREB1/MYB/SKI/TNFRSF1B/CCR2/RHEB/TNF/BIN1/TNFRSF21/HDAC1/TGFB1/PRKCH/NF1/WDR1/PRKCI/NOTCH1/RELA/CERS2/LIF/CX3CR1                                                                                                                                                                                                      |
| Biological Process | GO:0030336 | negative regulation of cell migration                                            | 51/2279 | 350/18866 | 0.0891705 | 0.4298823 | 0.3889727 | 51 | TACSTD2/ABR/CALR/PPARG/MIR140/KANK1/ARHGDI8/ZMYND8/ITGB1BP1/LDLRAD4/MIR199A1/TNF/MIR101-2/DUSP22/PADI2/JUP/NAV3/THBS1/C5AR2/MIR24-2/ILK/SMAD7/MIA3/WNT11/WASL/NISCH/TGFB1/PTPRJ/NF1/STK24/SRGA1/BCR/PLCB1/NFE2L2/ENG/VASH1/MIR138-2/CDH1/BCL2/MIR199A2/NOTCH1/CORO1C/MEF2C/DUSP3/SP100/TRIB1/ADTRP/CERS2/PTPRU/NODAL/CX3CR1 |

|                    |            |                                                 |         |           |           |           |           |    |                                                                                                                                                                                                                                                                                                                                                                                   |
|--------------------|------------|-------------------------------------------------|---------|-----------|-----------|-----------|-----------|----|-----------------------------------------------------------------------------------------------------------------------------------------------------------------------------------------------------------------------------------------------------------------------------------------------------------------------------------------------------------------------------------|
| Biological Process | GO:0046942 | carboxylic acid transport                       | 51/2279 | 350/18866 | 0.0891705 | 0.4298823 | 0.3889727 | 51 | SLC38A4/PRKAG2/RXRA/PPARG/SLC38A10/SLC51A/ACSL1/ABCC1/SLC16A3/SLC10A1/MFSD2A/MAP2K6/SLC11A1/SLC1A5/FOLR3/ABCC2/SLC15A4/THBS1/ATP8B1/LRRRC8C/PPFIA1/SLC43A2/SLC19A1/SLC26A1/NF1/SLCO3A1/SLC1A2/SLC7A7/SLC7A5/AGXT/SFXN1/NCOA1/ACACB/SLC1A6/SLC16A5/ABCC3/PER2/SLC16A1/SLC36A3/SLC1A3/ACACA/SLC43A1/SLC2A1/SLC7A8/NCOA2/SLC13A5/CPT1A/SLC7A1/SLC25A1/SLC23A1/AQP9                   |
| Biological Process | GO:0006446 | regulation of translational initiation          | 14/2279 | 79/18866  | 0.0901236 | 0.4298823 | 0.3889727 | 14 | RXRA/KLHL25/TNF/CCL5/NCK2/EIF2B5/LARP1/CTIF/AGO2/MIF4GD/PAIP1/BANK1/EIF3H/EIF4G1                                                                                                                                                                                                                                                                                                  |
| Biological Process | GO:0006826 | iron ion transport                              | 14/2279 | 79/18866  | 0.0901236 | 0.4298823 | 0.3889727 | 14 | LMTK2/SLC25A37/LCN2/SLC11A1/DNM2/SLC11A2/ATP6V1B2/SFXN1/ATP6V0B/LTF/ARHGAP1/ATP6V0C/ATP6V1C1/NECTIN1                                                                                                                                                                                                                                                                              |
| Biological Process | GO:0010827 | regulation of glucose transmembrane transport   | 14/2279 | 79/18866  | 0.0901236 | 0.4298823 | 0.3889727 | 14 | PRKAG2/MIR143/PIK3R1/TNF/GRB10/PRKCB/SLC1A2/HK2/PRKCI/NFE2L2/SLC2A1/RTN2/ASPSR1/CLTCL1                                                                                                                                                                                                                                                                                            |
| Biological Process | GO:0050672 | negative regulation of lymphocyte proliferation | 14/2279 | 79/18866  | 0.0901236 | 0.4298823 | 0.3889727 | 14 | IL10/MAD1L1/INPP5D/SFTPD/MNDA/PTPN6/TNFRSF21/ZBTB7B/BLK/CEBPB/PELI1/TMEM131L/VSIR/MARCHF7                                                                                                                                                                                                                                                                                         |
| Biological Process | GO:0052548 | regulation of endopeptidase activity            | 62/2279 | 434/18866 | 0.0903156 | 0.4298823 | 0.3889727 | 62 | SLPI/NLRC4/S100A8/CSTA/TIMP2/SORL1/SERPINA1/GRAMD4/SPOCK2/AIM2/PPARG/GSN/RPS6KA1/APLP2/LCK/SERPINB1/NLRP3/SMAD3/ARRB1/SPINT2/MEFV/TNF/TRAF2/CYFIP2/MICAL1/TBC1D10A/SERPINB2/CTSD/BIN1/THBS1/CTSH/RIPK1/APP/UBE2O/MBP/MIR24-2/HDAC1/PAX2/CIDEB/AQP1/PERP/POR/DNAJB6/BCL10/ATP2A3/PSMF1/CRIM1/NOL3/ARRB2/FIS1/PIH1D1/P2RX1/F2R/LTF/CASP1/BCL2L13/COL28A1/ASPH/NODAL/FADD/PCID2/VSIR |
| Biological Process | GO:0032411 | positive regulation of transporter activity     | 19/2279 | 114/18866 | 0.090358  | 0.4298823 | 0.3889727 | 19 | CCR2/DNM2/SGK1/KCTD7/TESC/NOS1AP/ACTN4/P2RY6/HTR3A/HTT/SYNGR3/GSTO1/ANK2/SGK2/PDZK1/CASQ1/FGF14/STIMATE/CRACR2A                                                                                                                                                                                                                                                                   |
| Biological Process | GO:0016485 | protein processing                              | 34/2279 | 223/18866 | 0.0904186 | 0.4298823 | 0.3889727 | 34 | CTSZ/NLRC4/CTSG/ENO1/PLAU/GSN/ASPRV1/GGT1/CYFIP2/SPG7/TBC1D10A/MIPEP/CPD/THBS1/MYH9/HM13/CTSH/PCSK6/CIDEB/F12/PERP/ADAMTS13/NOL3/AEBP1/CPB2/CASP1/ASPH/CLN5/FADD/C1RL/SPCS1/ANGPTL8/VSIR/AOPEP                                                                                                                                                                                    |
| Biological Process | GO:0051339 | regulation of lyase activity                    | 10/2279 | 52/18866  | 0.0905302 | 0.4298823 | 0.3889727 | 10 | RCVRN/TIMP2/CACNA1C/CCR2/GNAI2/AKAP5/LTB4R2/NF1/PALM/GABBR2                                                                                                                                                                                                                                                                                                                       |

|                    |            |                                                                                  |         |          |           |           |           |    |                                                                                                  |
|--------------------|------------|----------------------------------------------------------------------------------|---------|----------|-----------|-----------|-----------|----|--------------------------------------------------------------------------------------------------|
| Biological Process | GO:1903557 | positive regulation of tumor necrosis factor superfamily cytokine production     | 10/2279 | 52/18866 | 0.0905302 | 0.4298823 | 0.3889727 | 10 | PIK3R1/TLR9/SPON2/RIPK1/CLU/PTPRJ/PTPRC/NOD2/ARHGEF2/FADD                                        |
| Biological Process | GO:0001776 | leukocyte homeostasis                                                            | 15/2279 | 86/18866 | 0.0907795 | 0.4298823 | 0.3889727 | 15 | LAT/PIK3CD/ITPKB/CCR2/TNFAIP3/TNFSF13B/RIPK3/ZC3H8/JAM3/BCL10/SPTA1/DOCK10/BCL2/MEF2C/FADD       |
| Biological Process | GO:0006919 | activation of cysteine-type endopeptidase activity involved in apoptotic process | 15/2279 | 86/18866 | 0.0907795 | 0.4298823 | 0.3889727 | 15 | NLR4/S100A8/PPARG/LCK/NLRP3/SMAD3/TNF/TRAF2/CTSH/RIPK1/ATP2A3/P2RX1/F2R/BCL2L13/FADD             |
| Biological Process | GO:0070664 | negative regulation of leukocyte proliferation                                   | 15/2279 | 86/18866 | 0.0907795 | 0.4298823 | 0.3889727 | 15 | IL10/MAD1L1/INPP5D/TNFAIP3/SFTPD/MNDA/PTPN6/TNFRSF21/ZBTB7B/BLK/CEBPB/PELI1/TMEM131L/VSIR/MARCH7 |
| Biological Process | GO:0006656 | phosphatidylcholine biosynthetic process                                         | 8/2279  | 39/18866 | 0.0910492 | 0.4298823 | 0.3889727 | 8  | PCYT1A/MFSD2A/LPCAT1/SLC44A4/CHPT1/PCTP/CHKB/LPIN1                                               |
| Biological Process | GO:0030866 | cortical actin cytoskeleton organization                                         | 8/2279  | 39/18866 | 0.0910492 | 0.4298823 | 0.3889727 | 8  | CALR/FMNL3/TNF/FMNL1/EPB41L3/NCKAP1/STRIP1/EZR                                                   |
| Biological Process | GO:0031076 | embryonic camera-type eye development                                            | 8/2279  | 39/18866 | 0.0910492 | 0.4298823 | 0.3889727 | 8  | HIPK2/PAX2/RDH10/RARA/SP3/RARG/IFT140/ALDH1A2                                                    |
| Biological Process | GO:0032691 | negative regulation of interleukin-1 beta production                             | 8/2279  | 39/18866 | 0.0910492 | 0.4298823 | 0.3889727 | 8  | NLRP3/MEFV/TNFAIP3/MIR101-2/GHRL/ARRB2/CD33/CX3CR1                                               |
| Biological Process | GO:0050775 | positive regulation of dendrite morphogenesis                                    | 8/2279  | 39/18866 | 0.0910492 | 0.4298823 | 0.3889727 | 8  | CUX1/BAIAP2/ILK/SS18L2/CDKL3/DNM1L/CUX2/DBNL                                                     |

|                    |            |                                                                          |         |           |           |           |           |    |                                                                                                                                                                                                                                                                                                    |
|--------------------|------------|--------------------------------------------------------------------------|---------|-----------|-----------|-----------|-----------|----|----------------------------------------------------------------------------------------------------------------------------------------------------------------------------------------------------------------------------------------------------------------------------------------------------|
| Biological Process | GO:1901021 | positive regulation of calcium ion transmembrane transporter activity    | 8/2279  | 39/18866  | 0.0910492 | 0.4298823 | 0.3889727 | 8  | P2RY6/HTT/GSTO1/ANK2/CASQ1/FGF14/STIMATE/CRACR2A                                                                                                                                                                                                                                                   |
| Biological Process | GO:0050848 | regulation of calcium-mediated signaling                                 | 17/2279 | 100/18866 | 0.091057  | 0.4298823 | 0.3889727 | 17 | PDE4D/CASQ2/TNF/ITPR1/JSRP1/CAMTA1/RCAN1/P2RY6/MYO5A/DYRK2/HTT/GSTO1/FHL2/CHERP/P2RX5/STIMATE/SLA2                                                                                                                                                                                                 |
| Biological Process | GO:0035107 | appendage morphogenesis                                                  | 24/2279 | 150/18866 | 0.0914247 | 0.4298823 | 0.3889727 | 24 | IQCE/CACNA1C/SKI/GJA5/CHST11/ZBTB16/HDAC1/FGFR1/RDH10/RARG/BMPR1B/GRHL2/RUNX2/IFT140/CREBBP/HOXA9/NOTCH1/ALX3/GNA12/ASPH/ALDH1A2/ZNF219/MAP3K20/CPLANE1                                                                                                                                            |
| Biological Process | GO:0035108 | limb morphogenesis                                                       | 24/2279 | 150/18866 | 0.0914247 | 0.4298823 | 0.3889727 | 24 | IQCE/CACNA1C/SKI/GJA5/CHST11/ZBTB16/HDAC1/FGFR1/RDH10/RARG/BMPR1B/GRHL2/RUNX2/IFT140/CREBBP/HOXA9/NOTCH1/ALX3/GNA12/ASPH/ALDH1A2/ZNF219/MAP3K20/CPLANE1                                                                                                                                            |
| Biological Process | GO:0070661 | leukocyte proliferation                                                  | 46/2279 | 313/18866 | 0.0917755 | 0.4298823 | 0.3889727 | 46 | HLA-<br>DMB/IL27/IL10/MAD1L1/CD55/INPP5D/SLC11A1/TNFRSF1B/CCR2/TNFAIP3/CCL5/CSF1R/NCK2/SFTPD/NFATC2/TNFSF13B/TLR9/MNDA/TGFBR2/PTPN6/CLU/TNFRSF21/DOCK8/ZBTB7B/RIPK3/CD79A/BLK/CCDC88B/PTPRC/CD320/SPTA1/ZNF335/PNP/BCL2/MEF2C/CEBPB/HHEX/DOCK2/SLC7A1/FADD/PELI1/VAV3/IMPDH1/TMEM131L/VSIR/MARCHF7 |
| Biological Process | GO:1903532 | positive regulation of secretion by cell                                 | 46/2279 | 313/18866 | 0.0917755 | 0.4298823 | 0.3889727 | 46 | SORL1/NADK/IL10/TTN/C1QTNF3/MYRIP/CREB1/CLEC9A/MYB/MAP2K6/CD177/GAB2/FRMD4A/ARRB1/GPLD1/FGR/TNF/MYO18A/ABCG1/CLECSA/ITSN1/RAB27A/HLA-F/TCF7L2/FGFR1/SPHK2/TGFB1/GIPR/BLK/NR1H2/GHRL/ITGB2/MYOM1/DNM1L/PRKCE/CPB2/ANKRD1/CADM1/CD33/RPH3AL/EZR/DTNBP1/INHBA/C2CD2L/SIRT3/GRK2                       |
| Biological Process | GO:0046651 | lymphocyte proliferation                                                 | 42/2279 | 283/18866 | 0.0920095 | 0.4298823 | 0.3889727 | 42 | HLA-<br>DMB/IL27/IL10/MAD1L1/CD55/INPP5D/SLC11A1/TNFRSF1B/CCR2/CCL5/NCK2/SFTPD/NFATC2/TNFSF13B/TLR9/MNDA/TGFBR2/PTPN6/TNFRSF21/DOCK8/ZBTB7B/RIPK3/CD79A/BLK/CCDC88B/PTPRC/CD320/SPTA1/ZNF335/PNP/BCL2/MEF2C/CEBPB/DOCK2/SLC7A1/FADD/PELI1/VAV3/IMPDH1/TMEM131L/VSIR/MARCHF7                        |
| Biological Process | GO:0001906 | cell killing                                                             | 27/2279 | 172/18866 | 0.0925036 | 0.4298823 | 0.3889727 | 27 | DEFA4/AZU1/ELANE/CTSG/LYST/CD55/PIK3R6/SLAMF7/CTSH/TUBB4B/RAB27A/CD226/HLA-F/PTPN6/NCR1/RIPK3/CD59/PGLYRP1/PTPRC/ARRB2/IL18RAP/DNASE1L3/LTF/PGLYRP4/CADM1/FADD/CYRIB                                                                                                                               |
| Biological Process | GO:0070304 | positive regulation of stress-activated protein kinase signaling cascade | 27/2279 | 172/18866 | 0.0925036 | 0.4298823 | 0.3889727 | 27 | MAP3K3/ERN1/ZNF622/TNF/ZEB2/TRAF2/TRAF1/HIPK2/TLR9/DUSP22/TNIK/RIPK1/APP/MTURN/SCIMP/AXIN1/SH3RF3/STK3/PLCB1/MAPK8IP2/TAOK3/NOD2/GADD45G/GDF6/ANKRD6/DBNL/MAP3K20                                                                                                                                  |



|                    |            |                                                                    |         |           |           |           |           |    |                                                                                                                                                                                                                                                                                                                                                                                                                     |
|--------------------|------------|--------------------------------------------------------------------|---------|-----------|-----------|-----------|-----------|----|---------------------------------------------------------------------------------------------------------------------------------------------------------------------------------------------------------------------------------------------------------------------------------------------------------------------------------------------------------------------------------------------------------------------|
| Biological Process | GO:0014706 | striated muscle tissue development                                 | 56/2279 | 389/18866 | 0.0926803 | 0.4298823 | 0.3889727 | 56 | HDAC4/ZFPM1/RXRA/CALR/CTDP1/MYO18B/TTN/CREB1/MEF2D/MYH11/AKAP13/SKI/MAML1/SMAD3/SLC8A1/MIR199A1/GJA5/VGLL4/CCM2L/TGFBR2/MYH15/DLL1/RIPK1/RBPJ/MIR24-2/MIR23A/IFRD1/SMAD7/FGFR1/PAX7/TGFB1/IGSF8/VAMP5/SVIL/RARA/NF1/ENG/ARRB2/ARNTL/MYOM1/ANKRD2/RB1/MEIS1/BCL2/MIR199A2/NOTCH1/MEF2C/FHL2/HLX/PDGFRB/ANKRD1/FLOT1/ALDH1A2/CASQ1/PRKAA1/MYORG                                                                       |
| Biological Process | GO:0043903 | regulation of symbiotic process                                    | 35/2279 | 231/18866 | 0.0929404 | 0.4298823 | 0.3889727 | 35 | SLPI/TRIM27/P4HB/TRIM38/CTDP1/GSN/TRIM8/TRIM10/SRPK2/TNF/POLR2F/CCL5/CSF1R/SFTPD/LARP1/SNX3/HDAC1/PC/PHB/FCN1/TRIM5/TNIP1/RSF1/BCL2/NOTCH1/LTF/ILF3/MX1/NR5A2/PARP10/BANF1/ISG20/TRIM26/PRKN/SHFL                                                                                                                                                                                                                   |
| Biological Process | GO:0048738 | cardiac muscle tissue development                                  | 35/2279 | 231/18866 | 0.0929404 | 0.4298823 | 0.3889727 | 35 | ZFPM1/RXRA/CALR/CTDP1/MYO18B/TTN/CREB1/MYH11/AKAP13/MAML1/SLC8A1/MIR199A1/GJA5/VGLL4/CCM2L/TGFBR2/DLL1/RIPK1/RBPJ/MIR24-2/MIR23A/SMAD7/FGFR1/TGFB1/RARA/ENG/ARRB2/MEIS1/MIR199A2/NOTCH1/MEF2C/FHL2/PDGFRB/ANKRD1/ALDH1A2                                                                                                                                                                                            |
| Biological Process | GO:0002429 | immune response-activating cell surface receptor signaling pathway | 68/2279 | 481/18866 | 0.0934365 | 0.4298823 | 0.3889727 | 68 | PDE4D/LAT/FOXP1/C3AR1/PIK3CD/ELMO1/LCK/RUNX1/INPP5D/CLEC4C/DOCK1/PIK3R1/WIPF1/GPLD1/FGR/LAX1/CYFIP2/GRAP2/FPR2/FPR1/NFATC2/EIF2B5/MNDA/DUSP22/IGHV6-1/BAIAP2/C5AR2/CD226/PTPN6/MUC12/TNFRSF21/KLHL6/WASL/PRKCH/PTPRJ/PRKCB/FCN1/LILRB4/CD79A/MUC20/BLK/VAV2/PTPRC/ACTG1/CSK/BCL10/PSMF1/CREBBP/THEMIS2/NCKAP1/BCL2/PSMB7/MEF2C/DUSP3/PRAM1/PRKCE/ELF1/MYO1C/CYLD/PLCG1/CYFIP1/RELA/FBXW11/EZR/PSMD13/VAV3/FYB1/SLA2 |
| Biological Process | GO:0002757 | immune response-activating signal transduction                     | 68/2279 | 481/18866 | 0.0934365 | 0.4298823 | 0.3889727 | 68 | PDE4D/LAT/FOXP1/C3AR1/PIK3CD/ELMO1/LCK/RUNX1/INPP5D/CLEC4C/DOCK1/PIK3R1/WIPF1/GPLD1/FGR/LAX1/CYFIP2/GRAP2/FPR2/FPR1/NFATC2/EIF2B5/MNDA/DUSP22/IGHV6-1/BAIAP2/C5AR2/CD226/PTPN6/MUC12/TNFRSF21/KLHL6/WASL/PRKCH/PTPRJ/PRKCB/FCN1/LILRB4/CD79A/MUC20/BLK/VAV2/PTPRC/ACTG1/CSK/BCL10/PSMF1/CREBBP/THEMIS2/NCKAP1/BCL2/PSMB7/MEF2C/DUSP3/PRAM1/PRKCE/ELF1/MYO1C/CYLD/PLCG1/CYFIP1/RELA/FBXW11/EZR/PSMD13/VAV3/FYB1/SLA2 |
| Biological Process | GO:0045454 | cell redox homeostasis                                             | 11/2279 | 59/18866  | 0.0935132 | 0.4298823 | 0.3889727 | 11 | P4HB/MPO/SLC11A1/NCF4/LPO/PDIA5/NCF2/TMX1/NFE2L2/GLRX2/TXNRD2                                                                                                                                                                                                                                                                                                                                                       |
| Biological Process | GO:0045815 | positive regulation of gene expression, epigenetic                 | 11/2279 | 59/18866  | 0.0935132 | 0.4298823 | 0.3889727 | 11 | TAF1C/BAZ1B/SERTAD2/POLR2F/PADI2/ZMIZ1/SPHK2/ARID1B/SMARCD1/TAF1D/MYO1C                                                                                                                                                                                                                                                                                                                                             |
| Biological Process | GO:0000041 | transition metal ion transport                                     | 21/2279 | 129/18866 | 0.0947847 | 0.4298823 | 0.3889727 | 21 | TRPM2/LMTK2/SLC25A37/SLC39A11/LCN2/SLC11A1/DNM2/ABCC2/SLC11A2/ATP6V1B2/TMEM163/SFXN1/ATOX1/SLC39A13/ATP6V0B/LTF/ARHGAP1/ATP7B/ATP6V0C/ATP6V1C1/NECTIN1                                                                                                                                                                                                                                                              |
| Biological Process | GO:0002576 | platelet degranulation                                             | 21/2279 | 129/18866 | 0.0947847 | 0.4298823 | 0.3889727 | 21 | SERPINA1/CD9/TTN/APLP2/LY6G6F/THBS1/ACTN1/APP/ITGA2B/ACTN4/CLU/PHACTR2/TGFB1/BLK/ITGB3/LHFPL2/PDGFB/WDR1/TUBA4A/P2RX1/CYRIB                                                                                                                                                                                                                                                                                         |

|                    |            |                                                                                        |         |           |           |           |           |    |                                                                                                                                                                                                                                                                                                                                                                                         |
|--------------------|------------|----------------------------------------------------------------------------------------|---------|-----------|-----------|-----------|-----------|----|-----------------------------------------------------------------------------------------------------------------------------------------------------------------------------------------------------------------------------------------------------------------------------------------------------------------------------------------------------------------------------------------|
| Biological Process | GO:0035025 | positive regulation of Rho protein signal transduction                                 | 7/2279  | 33/18866  | 0.0954055 | 0.4298823 | 0.3889727 | 7  | AKAP13/ARRB1/SYNPO2L/F2R/GPR4/PDGFRB/PRAG1                                                                                                                                                                                                                                                                                                                                              |
| Biological Process | GO:0051984 | positive regulation of chromosome segregation                                          | 7/2279  | 33/18866  | 0.0954055 | 0.4298823 | 0.3889727 | 7  | NSMCE2/CUL3/CDC16/NUMA1/RB1/ANAPC7/SLF1                                                                                                                                                                                                                                                                                                                                                 |
| Biological Process | GO:0090022 | regulation of neutrophil chemotaxis                                                    | 7/2279  | 33/18866  | 0.0954055 | 0.4298823 | 0.3889727 | 7  | C3AR1/C5AR2/JAM3/CAMK1D/DAPK2/DNM1L/DYSF                                                                                                                                                                                                                                                                                                                                                |
| Biological Process | GO:1902003 | regulation of amyloid-beta formation                                                   | 7/2279  | 33/18866  | 0.0954055 | 0.4298823 | 0.3889727 | 7  | SORL1/TNF/ABCG1/BIN1/APP/CLU/RELA                                                                                                                                                                                                                                                                                                                                                       |
| Biological Process | GO:1902745 | positive regulation of lamellipodium organization                                      | 7/2279  | 33/18866  | 0.0954055 | 0.4298823 | 0.3889727 | 7  | HDAC4/RREB1/ARHGEF7/DNM2/NCKAP1/CORO1C/AVIL                                                                                                                                                                                                                                                                                                                                             |
| Biological Process | GO:0048568 | embryonic organ development                                                            | 64/2279 | 451/18866 | 0.0955191 | 0.4298823 | 0.3889727 | 64 | ZFPM1/ABR/IL10/POLE/SETD2/SMAD3/SPINT2/MTHFD1L/SUFU/TNF/GJA5/HIPK2/MICAL2/CHST11/E2F7/TGFBR2/SLC44A4/NDST1/DLL1/RBPJ/MIB1/LRIG1/WNT11/PAX2/FGFR1/TTC39C/TGFB1/RDH10/RARA/SP3/DNAJB6/DSCAML1/RARG/STK3/GRHL2/RUNX2/NCOA1/IFT140/PDGFB/BCR/ENG/VASH1/MTHFD1/HOXA9/NOTCH1/PBX4/ALX3/MEF2C/EPAS1/GGNBP2/PDGFC/HLX/TMED2/CEBPB/PCDH12/PDGFRB/ERCC1/TEAD2/PLCD3/ALDH1A2/NODAL/ERCC2/LIF/HOXB7 |
| Biological Process | GO:0032768 | regulation of monooxygenase activity                                                   | 12/2279 | 66/18866  | 0.0955699 | 0.4298823 | 0.3889727 | 12 | GFI1/VDR/DNM2/TNF/NOS1AP/CDH3/WASL/NOSTRIN/POR/CNR2/MIR138-2/NOSIP                                                                                                                                                                                                                                                                                                                      |
| Biological Process | GO:0090092 | regulation of transmembrane receptor protein serine/threonine kinase signaling pathway | 38/2279 | 254/18866 | 0.0957362 | 0.4298823 | 0.3889727 | 38 | LRG1/LTBP1/SPRED2/SORL1/MIR140/SKI/SMAD3/LDLRAD4/DNM2/HIPK2/CHST11/TGFBR2/THBS1/RBPJ/UBE2O/ILK/PCSK6/SMAD7/TGFB1/SMURF1/NUP93/TGFB11/BMPER/WWTR1/HTRA4/NUMA1/CREBBP/ENG/PRDM16/NOTCH1/RBPMS/HTRA3/GDF6/ZC3H3/ZNF423/INHBA/NODAL/SPART                                                                                                                                                   |
| Biological Process | GO:0010863 | positive regulation of phospholipase C activity                                        | 9/2279  | 46/18866  | 0.0963937 | 0.4298823 | 0.3889727 | 9  | FLT1/P2RY6/FGFR1/PHB/LPAR2/S1PR4/PDGFRB/PLCG1/NTF4                                                                                                                                                                                                                                                                                                                                      |

|                    |            |                                                          |         |           |           |           |           |    |                                                                                                                                                                                                       |
|--------------------|------------|----------------------------------------------------------|---------|-----------|-----------|-----------|-----------|----|-------------------------------------------------------------------------------------------------------------------------------------------------------------------------------------------------------|
| Biological Process | GO:0032692 | negative regulation of interleukin-1 production          | 9/2279  | 46/18866  | 0.0963937 | 0.4298823 | 0.3889727 | 9  | IL10/NLRP3/MEFV/TNFAIP3/MIR101-2/GHRL/ARRB2/CD33/CX3CR1                                                                                                                                               |
| Biological Process | GO:0035987 | endodermal cell differentiation                          | 9/2279  | 46/18866  | 0.0963937 | 0.4298823 | 0.3889727 | 9  | SETD2/COL4A2/COL12A1/ITGB5/ITGB2/COL5A1/LAMB3/INHBA/NODAL                                                                                                                                             |
| Biological Process | GO:0051489 | regulation of filopodium assembly                        | 9/2279  | 46/18866  | 0.0963937 | 0.4298823 | 0.3889727 | 9  | TRPM2/ZMYND8/ARAP1/WASL/ESPN/PALM/RALA/DNM3/PPP1R16B                                                                                                                                                  |
| Biological Process | GO:2000142 | regulation of DNA-templated transcription, initiation    | 9/2279  | 46/18866  | 0.0963937 | 0.4298823 | 0.3889727 | 9  | CREB1/HNF1A/MED13/ATF7IP/SUB1/MORC1/ERCC1/XPA/PAXIP1                                                                                                                                                  |
| Biological Process | GO:0042098 | T cell proliferation                                     | 30/2279 | 195/18866 | 0.0974087 | 0.4298823 | 0.3889727 | 30 | HLA-<br>DMB/IL27/IL10/MAD1L1/CD55/SLC11A1/TNFRSF1B/CCR2/CCL5/NCK2/SFTPD/TNFSF13B/TGFBR2/PTPN6/TNFRSF21/DOCK8/ZBTB7B/RIPK3/CCDC88B/PTPRC/SPTA1/PNP/CEBPB/DOCK2/SLC7A1/FADD/PELI1/TMEM131L/VSIR/MARCHF7 |
| Biological Process | GO:0002281 | macrophage activation involved in immune response        | 4/2279  | 15/18866  | 0.0976416 | 0.4298823 | 0.3889727 | 4  | SBNO2/GRN/PRKCE/DYSF                                                                                                                                                                                  |
| Biological Process | GO:0007638 | mechanosensory behavior                                  | 4/2279  | 15/18866  | 0.0976416 | 0.4298823 | 0.3889727 | 4  | NRXN1/HTT/NRXN2/SLC1A3                                                                                                                                                                                |
| Biological Process | GO:0010867 | positive regulation of triglyceride biosynthetic process | 4/2279  | 15/18866  | 0.0976416 | 0.4298823 | 0.3889727 | 4  | MFSD2A/GPLD1/NR1H2/SREBF1                                                                                                                                                                             |
| Biological Process | GO:0015936 | coenzyme A metabolic process                             | 4/2279  | 15/18866  | 0.0976416 | 0.4298823 | 0.3889727 | 4  | ACOT7/PPCDC/ACAT1/PANK4                                                                                                                                                                               |

|                    |            |                                                          |        |          |           |           |           |   |                            |
|--------------------|------------|----------------------------------------------------------|--------|----------|-----------|-----------|-----------|---|----------------------------|
| Biological Process | GO:0016114 | terpenoid biosynthetic process                           | 4/2279 | 15/18866 | 0.0976416 | 0.4298823 | 0.3889727 | 4 | DHRS9/RDH10/HMGCS1/ALDH1A2 |
| Biological Process | GO:0042362 | fat-soluble vitamin biosynthetic process                 | 4/2279 | 15/18866 | 0.0976416 | 0.4298823 | 0.3889727 | 4 | GFI1/VDR/TNF/PLTP          |
| Biological Process | GO:0043374 | CD8-positive, alpha-beta T cell differentiation          | 4/2279 | 15/18866 | 0.0976416 | 0.4298823 | 0.3889727 | 4 | RUNX1/ZBTB7B/BCL2/RUNX3    |
| Biological Process | GO:0045475 | locomotor rhythm                                         | 4/2279 | 15/18866 | 0.0976416 | 0.4298823 | 0.3889727 | 4 | ZFHX3/MTA1/USP2/NCOA2      |
| Biological Process | GO:0045779 | negative regulation of bone resorption                   | 4/2279 | 15/18866 | 0.0976416 | 0.4298823 | 0.3889727 | 4 | INPP5D/UBASH3B/TNFAIP3/CSK |
| Biological Process | GO:0050862 | positive regulation of T cell receptor signaling pathway | 4/2279 | 15/18866 | 0.0976416 | 0.4298823 | 0.3889727 | 4 | LCK/CD226/CYLD/RELA        |
| Biological Process | GO:0060391 | positive regulation of SMAD protein signal transduction  | 4/2279 | 15/18866 | 0.0976416 | 0.4298823 | 0.3889727 | 4 | TGFB1/NUP93/RBPMS/NODAL    |
| Biological Process | GO:0071801 | regulation of podosome assembly                          | 4/2279 | 15/18866 | 0.0976416 | 0.4298823 | 0.3889727 | 4 | GSN/TNF/ASAP1/ARHGEF2      |
| Biological Process | GO:0072148 | epithelial cell fate commitment                          | 4/2279 | 15/18866 | 0.0976416 | 0.4298823 | 0.3889727 | 4 | DLL1/RBPJ/RARA/NOTCH1      |

|                    |            |                                                                                         |         |          |           |           |           |    |                                                                                           |
|--------------------|------------|-----------------------------------------------------------------------------------------|---------|----------|-----------|-----------|-----------|----|-------------------------------------------------------------------------------------------|
| Biological Process | GO:0090192 | regulation of glomerulus development                                                    | 4/2279  | 15/18866 | 0.0976416 | 0.4298823 | 0.3889727 | 4  | PAX2/PDGFD/IL6R/PDGFB                                                                     |
| Biological Process | GO:0090594 | inflammatory response to wounding                                                       | 4/2279  | 15/18866 | 0.0976416 | 0.4298823 | 0.3889727 | 4  | CCR2/TGFB1/GRN/F2R                                                                        |
| Biological Process | GO:1901550 | regulation of endothelial cell development                                              | 4/2279  | 15/18866 | 0.0976416 | 0.4298823 | 0.3889727 | 4  | TNF/TNFRSF1A/ADD1/S1PR2                                                                   |
| Biological Process | GO:1902043 | positive regulation of extrinsic apoptotic signaling pathway via death domain receptors | 4/2279  | 15/18866 | 0.0976416 | 0.4298823 | 0.3889727 | 4  | THBS1/BMPR1B/STK3/TRPS1                                                                   |
| Biological Process | GO:1902187 | negative regulation of viral release from host cell                                     | 4/2279  | 15/18866 | 0.0976416 | 0.4298823 | 0.3889727 | 4  | TRIM27/TRIM8/TRIM5/TRIM26                                                                 |
| Biological Process | GO:1903140 | regulation of establishment of endothelial barrier                                      | 4/2279  | 15/18866 | 0.0976416 | 0.4298823 | 0.3889727 | 4  | TNF/TNFRSF1A/ADD1/S1PR2                                                                   |
| Biological Process | GO:2000402 | negative regulation of lymphocyte migration                                             | 4/2279  | 15/18866 | 0.0976416 | 0.4298823 | 0.3889727 | 4  | PADI2/MIA3/WASL/ADTRP                                                                     |
| Biological Process | GO:2001256 | regulation of store-operated calcium entry                                              | 4/2279  | 15/18866 | 0.0976416 | 0.4298823 | 0.3889727 | 4  | CD84/CASQ1/GRAMD2A/SARAF                                                                  |
| Biological Process | GO:0032945 | negative regulation of mononuclear cell proliferation                                   | 14/2279 | 80/18866 | 0.0976994 | 0.4298823 | 0.3889727 | 14 | IL10/MAD1L1/INPP5D/SFTPD/MNDA/PTPN6/TNFRSF21/ZBTB7B/BLK/CEBPB/PELI1/TMEM131L/VSIR/MARCHF7 |

|                    |            |                                                                                   |         |           |           |           |           |    |                                                                                                                                                                                                                                                                                                                                                         |
|--------------------|------------|-----------------------------------------------------------------------------------|---------|-----------|-----------|-----------|-----------|----|---------------------------------------------------------------------------------------------------------------------------------------------------------------------------------------------------------------------------------------------------------------------------------------------------------------------------------------------------------|
| Biological Process | GO:0045778 | positive regulation of ossification                                               | 16/2279 | 94/18866  | 0.0980452 | 0.4298823 | 0.3889727 | 16 | CEBPD/SMAD3/SLC8A1/ZBTB16/ILK/TGFB1/BMP1B/RUNX2/IL6R/MEF2C/NPPC/LTF/CEBPB/ANO6/FAM20C/CCN4                                                                                                                                                                                                                                                              |
| Biological Process | GO:0030512 | negative regulation of transforming growth factor beta receptor signaling pathway | 15/2279 | 87/18866  | 0.0980469 | 0.4298823 | 0.3889727 | 15 | LTBP1/SPRED2/SKI/SMAD3/LDLRAD4/DNM2/CHST11/TGFBR2/SMAD7/TGFB1/SMURF1/TGFB11/HTRA4/PRDM16/HTRA3                                                                                                                                                                                                                                                          |
| Biological Process | GO:0001562 | response to protozoan                                                             | 6/2279  | 27/18866  | 0.0988698 | 0.4298823 | 0.3889727 | 6  | IRF8/IL10/LYST/SLC11A1/CCDC88B/BCL3                                                                                                                                                                                                                                                                                                                     |
| Biological Process | GO:0002825 | regulation of T-helper 1 type immune response                                     | 6/2279  | 27/18866  | 0.0988698 | 0.4298823 | 0.3889727 | 6  | IL27/SLC11A1/IL1R1/CCR2/IL18R1/HLX                                                                                                                                                                                                                                                                                                                      |
| Biological Process | GO:0006779 | porphyrin-containing compound biosynthetic process                                | 6/2279  | 27/18866  | 0.0988698 | 0.4298823 | 0.3889727 | 6  | SLC11A2/FECH/ALAS1/SPTA1/PPOX/TMEM14C                                                                                                                                                                                                                                                                                                                   |
| Biological Process | GO:0033014 | tetrapyrrole biosynthetic process                                                 | 6/2279  | 27/18866  | 0.0988698 | 0.4298823 | 0.3889727 | 6  | SLC11A2/FECH/ALAS1/SPTA1/PPOX/TMEM14C                                                                                                                                                                                                                                                                                                                   |
| Biological Process | GO:1903319 | positive regulation of protein maturation                                         | 6/2279  | 27/18866  | 0.0988698 | 0.4298823 | 0.3889727 | 6  | NLRC4/ENO1/GSN/MYH9/F12/ANGPTL8                                                                                                                                                                                                                                                                                                                         |
| Biological Process | GO:2000353 | positive regulation of endothelial cell apoptotic process                         | 6/2279  | 27/18866  | 0.0988698 | 0.4298823 | 0.3889727 | 6  | MIR101-2/THBS1/MIR24-2/PRKCI/ANO6/PLCG1                                                                                                                                                                                                                                                                                                                 |
| Biological Process | GO:0015849 | organic acid transport                                                            | 51/2279 | 353/18866 | 0.0996326 | 0.4298823 | 0.3889727 | 51 | SLC38A4/PRKAG2/RXRA/PPARG/SLC38A10/SLC51A/ACSL1/ABCC1/SLC16A3/SLC10A1/MFSD2A/SLC11A1/SLC1A5/FOLR3/ABCC2/SLC15A4/THBS1/ATP8B1/LRRRC8C/PPFIA1/SLC43A2/SLC19A1/SLC26A1/NF1/SLC3A1/SLC1A2/SLC7A7/SLC7A5/AGXT/SFXN1/NCOA1/ACACB/SLC1A6/SLC16A5/ABCC3/PER2/SLC16A1/SLC36A3/SLC1A3/ACACA/SLC43A1/SLC2A1/SLC7A8/NCOA2/SLC13A5/CPT1A/SLC7A1/SLC25A1/SLC23A1/AQP9 |

|                    |            |                                                           |         |          |           |           |           |    |                                                                 |
|--------------------|------------|-----------------------------------------------------------|---------|----------|-----------|-----------|-----------|----|-----------------------------------------------------------------|
| Biological Process | GO:0043949 | regulation of cAMP-mediated signaling                     | 10/2279 | 53/18866 | 0.1001169 | 0.4298823 | 0.3889727 | 10 | PDE4D/MGRN1/PRKAR1B/PRKCA/GNAI2/MRAP/CRTC3/RAPGEF2/GIPR/PDE3B   |
| Biological Process | GO:0097035 | regulation of membrane lipid distribution                 | 10/2279 | 53/18866 | 0.1001169 | 0.4298823 | 0.3889727 | 10 | ABCC1/TMEM30A/ABCG1/ATP8A1/ANO7/ATP11A/ATP8B1/ABCA1/ATP8B4/ANO6 |
| Biological Process | GO:0002115 | store-operated calcium entry                              | 5/2279  | 21/18866 | 0.1003904 | 0.4298823 | 0.3889727 | 5  | CD84/CASQ1/GRAMD2A/SARAF/CRACR2A                                |
| Biological Process | GO:0009110 | vitamin biosynthetic process                              | 5/2279  | 21/18866 | 0.1003904 | 0.4298823 | 0.3889727 | 5  | GF11/VDR/TNF/PLTP/PDXK                                          |
| Biological Process | GO:0010801 | negative regulation of peptidyl-threonine phosphorylation | 5/2279  | 21/18866 | 0.1003904 | 0.4298823 | 0.3889727 | 5  | SPRED2/SMAD7/DGKQ/PPP2R5D/EIF4G1                                |
| Biological Process | GO:0010893 | positive regulation of steroid biosynthetic process       | 5/2279  | 21/18866 | 0.1003904 | 0.4298823 | 0.3889727 | 5  | TNF/ABCG1/POR/SREBF1/PRKAA1                                     |
| Biological Process | GO:0032616 | interleukin-13 production                                 | 5/2279  | 21/18866 | 0.1003904 | 0.4298823 | 0.3889727 | 5  | PRKCZ/NLRP3/TNFRSF21/SPHK2/RARA                                 |
| Biological Process | GO:0046519 | sphingoid metabolic process                               | 5/2279  | 21/18866 | 0.1003904 | 0.4298823 | 0.3889727 | 5  | SPTLC2/SPHK2/SGPP1/SGPP2/PLPP3                                  |
| Biological Process | GO:0046823 | negative regulation of nucleocytoplasmic transport        | 5/2279  | 21/18866 | 0.1003904 | 0.4298823 | 0.3889727 | 5  | ANGPT1/SUFU/NF1/CABP1/SP100                                     |

|                    |            |                                                             |         |           |           |           |           |    |                                                                                                                                                                                                                                                                                           |
|--------------------|------------|-------------------------------------------------------------|---------|-----------|-----------|-----------|-----------|----|-------------------------------------------------------------------------------------------------------------------------------------------------------------------------------------------------------------------------------------------------------------------------------------------|
| Biological Process | GO:0048305 | immunoglobulin secretion                                    | 5/2279  | 21/18866  | 0.1003904 | 0.4298823 | 0.3889727 | 5  | TNF/TRAF2/TNFSF13B/POU2F2/TRAF3IP2                                                                                                                                                                                                                                                        |
| Biological Process | GO:0060713 | labyrinthine layer morphogenesis                            | 5/2279  | 21/18866  | 0.1003904 | 0.4298823 | 0.3889727 | 5  | IL10/SPINT2/DNAJB6/GRHL2/NCOA1                                                                                                                                                                                                                                                            |
| Biological Process | GO:0060716 | labyrinthine layer blood vessel development                 | 5/2279  | 21/18866  | 0.1003904 | 0.4298823 | 0.3889727 | 5  | RBPJ/VASH1/GGNBP2/TMED2/PLCD3                                                                                                                                                                                                                                                             |
| Biological Process | GO:2000737 | negative regulation of stem cell differentiation            | 5/2279  | 21/18866  | 0.1003904 | 0.4298823 | 0.3889727 | 5  | LBH/NFE2L2/ESRRB/NOTCH1/CDK13                                                                                                                                                                                                                                                             |
| Biological Process | GO:0048706 | embryonic skeletal system development                       | 21/2279 | 130/18866 | 0.1007954 | 0.4298823 | 0.3889727 | 21 | SETD2/SMAD3/MTHFD1L/CHST11/TGFBR2/NDST1/WNT11/XYL1/PAX7/RDH10/SP3/DSCAML1/GRHL2/RUNX2/IFT140/MTHFD1/HOXA9/ALX3/MEF2C/NODAL/HOXB7                                                                                                                                                          |
| Biological Process | GO:2000058 | regulation of ubiquitin-dependent protein catabolic process | 25/2279 | 159/18866 | 0.1008308 | 0.4298823 | 0.3889727 | 25 | TRIM39/RNF144A/FZR1/RNF19A/CSNK1D/SUFU/HIPK2/CBFA2T3/DISC1/CLU/SMAD7/SMURF1/AXIN1/CLEC16A/CSNK1E/NFE2L2/RNF144B/MAP1A/GNA12/UBE3A/RNF14/TRIB1/BAG5/SVIP/PRKN                                                                                                                              |
| Biological Process | GO:0009914 | hormone transport                                           | 47/2279 | 323/18866 | 0.1008937 | 0.4298823 | 0.3889727 | 47 | NADK/C1QTNF3/ITPR2/MYRIP/CREB1/MYB/CACNA1C/LRP5L/RAB11FIP1/ARRB1/PRKCA/GPLD1/TNF/CCL5/ABCC2/ITSN1/ITPR1/RFX3/TCF7L2/HNF1A/PTPRN2/FGFR1/IL1RN/CRHBP/ENY2/MYO5A/GIPR/BLK/SLC7A5/GHRL/KLF7/ARNTL/PER2/SLC16A1/PRKCE/AGTR1/CRYM/SLC2A1/SLC7A8/SREBF1/CPT1A/RPH3AL/INHBA/LIF/C2CD2L/SIRT3/PRKN |
| Biological Process | GO:0048736 | appendage development                                       | 28/2279 | 181/18866 | 0.1010023 | 0.4298823 | 0.3889727 | 28 | IQCE/CACNA1C/SKI/GJA5/CHST11/ZBTB16/PRKAB1/HDAC1/FGFR1/KREMEN1/RDH10/RARA/RARG/BMPR1B/GRHL2/RUNX2/IFT140/CREBBP/KREMEN2/HOXA9/NOTCH1/ALX3/GNA12/ASPH/ALDH1A2/ZNF219/MAP3K20/PLANE1                                                                                                        |
| Biological Process | GO:0060173 | limb development                                            | 28/2279 | 181/18866 | 0.1010023 | 0.4298823 | 0.3889727 | 28 | IQCE/CACNA1C/SKI/GJA5/CHST11/ZBTB16/PRKAB1/HDAC1/FGFR1/KREMEN1/RDH10/RARA/RARG/BMPR1B/GRHL2/RUNX2/IFT140/CREBBP/KREMEN2/HOXA9/NOTCH1/ALX3/GNA12/ASPH/ALDH1A2/ZNF219/MAP3K20/PLANE1                                                                                                        |



|                    |            |                                                                |         |           |           |           |           |    |                                                                                                                                                                                                                                                                                                                                               |
|--------------------|------------|----------------------------------------------------------------|---------|-----------|-----------|-----------|-----------|----|-----------------------------------------------------------------------------------------------------------------------------------------------------------------------------------------------------------------------------------------------------------------------------------------------------------------------------------------------|
| Biological Process | GO:0001654 | eye development                                                | 55/2279 | 384/18866 | 0.1015686 | 0.4298823 | 0.3889727 | 55 | SPRED2/RXRA/PDE6A/FZR1/SLC25A25/LIMK2/MFSD2A/LPCAT1/CACNA1C/LRP5L/SKI/CRB1/SMAD3/ZEB2/SH3PXD2B/HIPK2/TGFBR2/MYH15/NINJ1/DLL1/HDAC1/GNAT2/PAX2/FLT1/RDH10/RARA/NF1/CRYBB1/SP3/RARG/BMPR1B/WNT5B/GRHL2/IFT140/MEIS2/PRKCI/MYOM1/MEIS1/BCL2/RPGRIP1/ZHX2/PBX4/COL5A1/SDK2/BCAR3/NRL/PDGFRB/ARHGFE15/TMOD1/ALDH1A2/INHBA/CABP4/TSKU/NPHP4/NECTIN1 |
| Biological Process | GO:0048675 | axon extension                                                 | 20/2279 | 123/18866 | 0.1019746 | 0.4298823 | 0.3889727 | 20 | SEMA6B/NRP2/ULK1/CTTN/DNM2/SEMA4A/RTN4/DISC1/SEMA4B/IFRD1/ILK/SEMA4D/CDH4/CDKL3/SLIT3/CYFIP1/TRPV2/NDEL1/SLIT1/DBNL                                                                                                                                                                                                                           |
| Biological Process | GO:0050730 | regulation of peptidyl-tyrosine phosphorylation                | 39/2279 | 263/18866 | 0.1021345 | 0.4298823 | 0.3889727 | 39 | PRKCZ/TGFA/SH3BP5L/ANGPT1/TNF/CCL5/CSF1R/NCK2/SH3BP5/DUSP22/APP/PTPN6/TNFRSF1A/TGFB1/PTPRJ/SEMA4D/DGKQ/PDGFD/LRRK1/CSF3/ITGB3/GHRL/PTPRC/IL6R/PDGFB/PPP2R1A/CASS4/ARRB2/ITGB2/PRKCE/GGNBP2/BANK1/PDGFC/ARHGFE2/PDGFRB/INPP5F/CRLF1/PARP9/LIF                                                                                                  |
| Biological Process | GO:0002714 | positive regulation of B cell mediated immunity                | 8/2279  | 40/18866  | 0.1023718 | 0.4298823 | 0.3889727 | 8  | TNF/CD226/TGFB1/PTPRC/TP53BP1/TNFSF13/PAXIP1/NSD2                                                                                                                                                                                                                                                                                             |
| Biological Process | GO:0002891 | positive regulation of immunoglobulin mediated immune response | 8/2279  | 40/18866  | 0.1023718 | 0.4298823 | 0.3889727 | 8  | TNF/CD226/TGFB1/PTPRC/TP53BP1/TNFSF13/PAXIP1/NSD2                                                                                                                                                                                                                                                                                             |
| Biological Process | GO:0006730 | one-carbon metabolic process                                   | 8/2279  | 40/18866  | 0.1023718 | 0.4298823 | 0.3889727 | 8  | MTHFD1L/MTHFS/SFXN1/MTHFD1/CA3/CA1/MAT1A/CA12                                                                                                                                                                                                                                                                                                 |
| Biological Process | GO:0030501 | positive regulation of bone mineralization                     | 8/2279  | 40/18866  | 0.1023718 | 0.4298823 | 0.3889727 | 8  | SMAD3/SLC8A1/TGFB1/BMPR1B/MEF2C/LTF/ANO6/FAM20C                                                                                                                                                                                                                                                                                               |
| Biological Process | GO:0043403 | skeletal muscle tissue regeneration                            | 8/2279  | 40/18866  | 0.1023718 | 0.4298823 | 0.3889727 | 8  | CD9/TGFBR2/IFRD1/PAX7/ENO3/PKM/DYSF/EYS                                                                                                                                                                                                                                                                                                       |
| Biological Process | GO:0048713 | regulation of oligodendrocyte differentiation                  | 8/2279  | 40/18866  | 0.1023718 | 0.4298823 | 0.3889727 | 8  | PPARG/TNFRSF1B/RHEB/TNFRSF21/HDAC1/NF1/WDR1/NOTCH1                                                                                                                                                                                                                                                                                            |

|                    |            |                                                   |         |           |           |           |           |    |                                                                                                                                                                                                                                                                                 |
|--------------------|------------|---------------------------------------------------|---------|-----------|-----------|-----------|-----------|----|---------------------------------------------------------------------------------------------------------------------------------------------------------------------------------------------------------------------------------------------------------------------------------|
| Biological Process | GO:0060562 | epithelial tube morphogenesis                     | 48/2279 | 331/18866 | 0.1025062 | 0.4298823 | 0.3889727 | 48 | CTSZ/TACSTD2/FOXP1/SHROOM3/LRP5L/SKI/VDR/SETD2/SMAD3/SPINT2/MTHFD1L/SUFU/TNF/ZEB2/CSF1R/CCM2/MICAL2/TGFBR2/CTSH/DLL1/RBPJ/MIB1/ILK/WNT11/PAX2/TGFB1/RDH10/RARA/PFN1/MTSS1/RARG/STK3/GRHL2/BCL10/ENG/MTHFD1/RALA/BCL2/NOTCH1/MEF2C/NOTCH4/TMED2/TSC2/TEAD2/LMO4/NODAL/HOXB7/BRD2 |
| Biological Process | GO:0001836 | release of cytochrome c from mitochondria         | 11/2279 | 60/18866  | 0.1026469 | 0.4298823 | 0.3889727 | 11 | PAM16/BMF/CLU/CIDEB/NOL3/ARRB2/FIS1/BCL2/DNM1L/BCL2L1/PRKN                                                                                                                                                                                                                      |
| Biological Process | GO:0010823 | negative regulation of mitochondrion organization | 11/2279 | 60/18866  | 0.1026469 | 0.4298823 | 0.3889727 | 11 | VAT1/PAM16/CLU/CLEC16A/NOL3/ARRB2/FNIP2/DNM1L/TSC2/BCL2L1/PRKN                                                                                                                                                                                                                  |
| Biological Process | GO:0035904 | aorta development                                 | 11/2279 | 60/18866  | 0.1026469 | 0.4298823 | 0.3889727 | 11 | LTBP1/MIR143/MIR145/MYLK/DNM2/SUFU/NDST1/RBPJ/ENG/NOTCH1/PDGFRB                                                                                                                                                                                                                 |
| Biological Process | GO:0007033 | vacuole organization                              | 27/2279 | 174/18866 | 0.1028136 | 0.4298823 | 0.3889727 | 27 | ENO1/ULK1/HEXB/LYST/MBTPS1/PACS2/WIPI2/PIP4K2A/FEZ2/SMURF1/RUFY4/ENO3/RAB43/VPS18/ATG14/ABCA1/HOOK2/GRN/TPCN2/TBC1D14/ARSB/VMP1/UBXN2A/CLN5/NPRL2/STING1/ACP3                                                                                                                   |
| Biological Process | GO:2001020 | regulation of response to DNA damage stimulus     | 34/2279 | 226/18866 | 0.103864  | 0.4298823 | 0.3889727 | 34 | FAM168A/SPRED2/SPIDR/RMI2/RAD52/SETD2/RTEL1/WRNIP1/RECQL5/NACC2/OTUB2/ZNF385A/CLU/UBE2V1/OTUB1/BCL2/TP53BP1/FOXO1/CHEK2/TRIP12/ERCC1/BCL2L1/ANKRD1/KAT7/PARP9/PAXIP1/TFIP11/MARCHF7/NSD2/CYREN/ABRAXAS1/SLF1/FBH1/BABAM2                                                        |
| Biological Process | GO:0032943 | mononuclear cell proliferation                    | 42/2279 | 286/18866 | 0.1039846 | 0.4298823 | 0.3889727 | 42 | HLA-<br>DMB/IL27/IL10/MAD1L1/CD55/INPP5D/SLC11A1/TNFRSF1B/CCR2/CCL5/NCK2/SFTPD/NFATC2/TNFSF13B/TLR9/MNDA/TGFBR2/PTPN6/TNFRSF21/DOCK8/ZBTB7B/RIPK3/CD79A/BLK/CCDC88B/PTPRC/CD320/SPTA1/ZNF335/PNP/BCL2/MEF2C/CEBPB/DOCK2/SLC7A1/FADD/PELI1/VAV3/IMPDH1/TMEM131L/VSIR/MARCHF7     |
| Biological Process | GO:0140014 | mitotic nuclear division                          | 42/2279 | 286/18866 | 0.1039846 | 0.4298823 | 0.3889727 | 42 | ARHGEF10/TGFA/CTDP1/MAD1L1/TTN/TNKS/NDE1/PRKCA/NSMCE2/RCC1/CHAMP1/CUL3/CCDC8/CDC16/MIS12/DCTN2/PRKCB/TACC3/STAG1/NUMA1/PDGFB/PPP2R1A/MSTO1/NEK6/RB1/RAD21L1/CDCAS/DIS3L2/CHEK2/ANAPC7/PDGFRB/SPAG5/HECW2/CDC14A/AURKAIP1/NDEL1/LPIN1/DAPK3/CDK13/PCID2/ABRAXAS1/SLF1            |
| Biological Process | GO:0002286 | T cell activation involved in immune response     | 18/2279 | 109/18866 | 0.1039933 | 0.4298823 | 0.3889727 | 18 | HLA-DMB/IL27/PRKCZ/ZFPM1/FOXP1/MYB/SLC11A1/NLRP3/LOXL3/SEMA4A/RAB27A/SMAD7/LY9/ZBTB7B/RARA/IL18R1/HLX/BCL3                                                                                                                                                                      |

|                    |            |                                                                                                                           |         |           |           |           |           |    |                                                                                                                                                                                                                                                                                                                               |
|--------------------|------------|---------------------------------------------------------------------------------------------------------------------------|---------|-----------|-----------|-----------|-----------|----|-------------------------------------------------------------------------------------------------------------------------------------------------------------------------------------------------------------------------------------------------------------------------------------------------------------------------------|
| Biological Process | GO:0038127 | ERBB signaling pathway                                                                                                    | 23/2279 | 145/18866 | 0.1040154 | 0.4298823 | 0.3889727 | 23 | TGFA/SH3TC2/PIK3R1/PRKCA/ARHGEF7/NCK2/DOK1/RHBDF2/RTN4/ARAP1/APP/RBPJ/EP515L1/TGFB1/FER/PTPRJ/FAM83A/PDE6H/DGKD/DUSP3/EP515/PLCG1/MVB12A                                                                                                                                                                                      |
| Biological Process | GO:0071322 | cellular response to carbohydrate stimulus                                                                                | 23/2279 | 145/18866 | 0.1040154 | 0.4298823 | 0.3889727 | 23 | NADK/SLC2A5/MAP2K6/LRP5L/ERN1/ARRB1/GPLD1/COLEC12/IGF1R/PTPRN2/PAX2/ENY2/PRKCB/GHRL/KLF7/FIS1/PIH1D1/PRKCE/CPB2/PCK2/SLC29A1/C2CD2L/PRKAA1                                                                                                                                                                                    |
| Biological Process | GO:0045670 | regulation of osteoclast differentiation                                                                                  | 12/2279 | 67/18866  | 0.1042813 | 0.4298823 | 0.3889727 | 12 | CREB1/INPP5D/PIK3R1/TNF/UBASH3B/TMEM178A/LILRB4/NF1/TMEM64/LRRC17/LTF/CEBPB                                                                                                                                                                                                                                                   |
| Biological Process | GO:0034250 | positive regulation of cellular amide metabolic process                                                                   | 26/2279 | 167/18866 | 0.1046288 | 0.4298823 | 0.3889727 | 26 | RXRA/PLD1/TNF/CCL5/NCK2/ABCG1/EIF2B5/LARP1/KRT17/THBS1/APP/SAMD4A/TNFRSF1A/CLU/CTIF/SPHK2/MIF4GD/CPEB3/NFE2L2/PKM/PAIP1/RELA/BCL3/EIF4G1/SIRT3/NIBAN1                                                                                                                                                                         |
| Biological Process | GO:0032006 | regulation of TOR signaling                                                                                               | 17/2279 | 102/18866 | 0.1047732 | 0.4298823 | 0.3889727 | 17 | RPTOR/MIR199A1/RHEB/DGKQ/CLEC16A/SIK3/SEC13/SH3BP4/ARNTL/MIR199A2/PIH1D1/GNA12/TSC2/TNFAIP8L1/TTI1/NPRL2/PRKAA1                                                                                                                                                                                                               |
| Biological Process | GO:0006801 | superoxide metabolic process                                                                                              | 13/2279 | 74/18866  | 0.1052322 | 0.4298823 | 0.3889727 | 13 | MPO/CD177/NCF4/TNF/FPR2/SH3PXD2B/GNAI2/PREX1/NCF2/TGFB1/NFE2L2/ITGB2/SIRT3                                                                                                                                                                                                                                                    |
| Biological Process | GO:0002460 | adaptive immune response based on somatic recombination of immune receptors built from immunoglobulin superfamily domains | 53/2279 | 370/18866 | 0.106113  | 0.4298823 | 0.3889727 | 53 | IL27/PRKCZ/FUT7/IL10/CD55/INPP5D/SLC11A1/TNFRSF1B/NLRP3/IL1R1/CCR2/TNF/TRAF2/TNFAIP3/LOXL3/TNFSF13B/DUSP22/IGHV6-1/SEMA4A/CTSH/RAB27A/CD226/HLA-F/PTPN6/CLU/SMAD7/UNG/KLHL6/LY9/ZBTB7B/TGFB1/PHB/RIPK3/BACH2/C1S/PTPRC/BCL10/IL18RAP/POU2F2/TP53BP1/MEF2C/IL18R1/HLX/ERCC1/TNFSF13/C1QB/BCL3/FADD/PAXIP1/C1RL/CYRIB/NSD2/SLA2 |
| Biological Process | GO:0007050 | cell cycle arrest                                                                                                         | 35/2279 | 234/18866 | 0.1063882 | 0.4298823 | 0.3889727 | 35 | RPTOR/PRKAG2/CALR/TFDP1/APBB2/MAP2K6/ERN1/SMAD3/RHEB/E2F7/WHAMM/ZFH3/BIN1/THBS1/PCBP4/ZNF385A/TCF7L2/ZBTB17/PRKAB1/ILK/TGFB1/ARID3A/CAB39/VASH1/RB1/NOTCH1/MED25/FOXM1/CHEK2/ZBTB49/CDC14A/INHBA/TBRG4/PRKAA1/MAP3K20                                                                                                         |
| Biological Process | GO:0007157 | heterophilic cell-cell adhesion via plasma membrane cell adhesion molecules                                               | 9/2279  | 47/18866  | 0.1071106 | 0.4298823 | 0.3889727 | 9  | CADM3/CRB1/CEACAM6/CDH4/CADM1/CEACAM5/JAML/NECTIN1/NECTIN4                                                                                                                                                                                                                                                                    |

|                    |            |                                                       |         |           |           |           |           |    |                                                                                                                                                                                                                                                                                                |
|--------------------|------------|-------------------------------------------------------|---------|-----------|-----------|-----------|-----------|----|------------------------------------------------------------------------------------------------------------------------------------------------------------------------------------------------------------------------------------------------------------------------------------------------|
| Biological Process | GO:0008542 | visual learning                                       | 9/2279  | 47/18866  | 0.1071106 | 0.4298823 | 0.3889727 | 9  | CREB1/PPP1R1B/TANC1/APP/SYNGAP1/HRH1/NF1/MEIS2/SYNPO                                                                                                                                                                                                                                           |
| Biological Process | GO:0042551 | neuron maturation                                     | 9/2279  | 47/18866  | 0.1071106 | 0.4298823 | 0.3889727 | 9  | LGI4/BCL11A/APP/FEV/RB1/BCL2/CLN5/SPTBN4/GLDN                                                                                                                                                                                                                                                  |
| Biological Process | GO:0051047 | positive regulation of secretion                      | 49/2279 | 340/18866 | 0.1079265 | 0.4298823 | 0.3889727 | 49 | S100A8/SORL1/NADK/IL10/TTN/C1QTNF3/MYRIP/CREB1/CLEC9A/MYB/MAP2K6/CD177/GAB2/FRMD4A/ARRB1/GPLD1/FGR/TNF/MYO18A/ABCG1/CLEC5A/ITSN1/RAB27A/GNAI2/HLA-F/TCF7L2/FGFR1/SPHK2/TGFB1/AQP1/GIPR/BLK/NR1H2/GHRL/ITGB2/MYOM1/DNM1L/PRKCE/CPB2/ANKRD1/CADM1/CD33/RPH3AL/EZR/DTNBP1/INHBA/C2CD2L/SIRT3/GRK2 |
| Biological Process | GO:0001678 | cellular glucose homeostasis                          | 24/2279 | 153/18866 | 0.1082482 | 0.4298823 | 0.3889727 | 24 | FOXK1/NADK/HK1/LRP5L/ERN1/PIK3R1/ARRB1/GPLD1/IGF1R/PTPRN2/PAX2/ENY2/HK2/GHRL/KLF7/FIS1/PIH1D1/PRKCE/CPB2/PCK2/FOXO1/SLC29A1/C2CD2L/PRKAA1                                                                                                                                                      |
| Biological Process | GO:0008203 | cholesterol metabolic process                         | 24/2279 | 153/18866 | 0.1082482 | 0.4298823 | 0.3889727 | 24 | OSBPL5/RXRA/IDI1/LIPC/MBTPS1/ABCG1/HDLBP/AKR1D1/APP/FDX1/DGKQ/POR/ABCA1/GNB3/ACACB/CAT/NPC1/ACACA/LMF1/HMGCS1/SCD/SREBF1/ACADVL/PRKAA1                                                                                                                                                         |
| Biological Process | GO:0001881 | receptor recycling                                    | 7/2279  | 34/18866  | 0.108256  | 0.4298823 | 0.3889727 | 7  | LMTK2/SORL1/TBC1D16/ARAP1/EP515/INPP5F/PHETA1                                                                                                                                                                                                                                                  |
| Biological Process | GO:0006891 | intra-Golgi vesicle-mediated transport                | 7/2279  | 34/18866  | 0.108256  | 0.4298823 | 0.3889727 | 7  | VTI1A/TRAPPC10/CUX1/COG1/TRAPPC3L/COG8/COG5                                                                                                                                                                                                                                                    |
| Biological Process | GO:0018149 | peptide cross-linking                                 | 7/2279  | 34/18866  | 0.108256  | 0.4298823 | 0.3889727 | 7  | CSTA/SPOCK2/TGM5/THBS1/EGFLAM/TGM3/EPB42                                                                                                                                                                                                                                                       |
| Biological Process | GO:0032232 | negative regulation of actin filament bundle assembly | 7/2279  | 34/18866  | 0.108256  | 0.4298823 | 0.3889727 | 7  | TACSTD2/ARAP1/PPFIA1/PFN1/MIR138-2/ARHGEF18/PRKN                                                                                                                                                                                                                                               |

|                    |            |                                                     |         |           |           |           |           |    |                                                                                                                      |
|--------------------|------------|-----------------------------------------------------|---------|-----------|-----------|-----------|-----------|----|----------------------------------------------------------------------------------------------------------------------|
| Biological Process | GO:0055022 | negative regulation of cardiac muscle tissue growth | 7/2279  | 34/18866  | 0.108256  | 0.4298823 | 0.3889727 | 7  | CTDP1/MIR199A1/VGLL4/TGFBR2/RIPK1/MEIS1/MIR199A2                                                                     |
| Biological Process | GO:0061117 | negative regulation of heart growth                 | 7/2279  | 34/18866  | 0.108256  | 0.4298823 | 0.3889727 | 7  | CTDP1/MIR199A1/VGLL4/TGFBR2/RIPK1/MEIS1/MIR199A2                                                                     |
| Biological Process | GO:0070050 | neuron cellular homeostasis                         | 7/2279  | 34/18866  | 0.108256  | 0.4298823 | 0.3889727 | 7  | DCTN1/ATP2B2/MAP1A/P2RX1/TYRO3/PRKAA1/PRKN                                                                           |
| Biological Process | GO:0070232 | regulation of T cell apoptotic process              | 7/2279  | 34/18866  | 0.108256  | 0.4298823 | 0.3889727 | 7  | CCL5/PTCRA/DOCK8/RIPK3/ZC3H8/FADD/GIMAP8                                                                             |
| Biological Process | GO:2000036 | regulation of stem cell population maintenance      | 7/2279  | 34/18866  | 0.108256  | 0.4298823 | 0.3889727 | 7  | MIR145/WDR43/LBH/PAX2/ESRRB/NODAL/ZNF706                                                                             |
| Biological Process | GO:0002688 | regulation of leukocyte chemotaxis                  | 20/2279 | 124/18866 | 0.1084623 | 0.4298823 | 0.3889727 | 20 | CALR/C3AR1/CCR2/CCL5/CSF1R/FPR2/PADI2/THBS1/C5AR2/DEFB124/ZNF580/JAM3/CAMK1D/CXCL17/IL6R/DAPK2/DNM1L/ANO6/DYSF/CCL27 |
| Biological Process | GO:0014902 | myotube differentiation                             | 19/2279 | 117/18866 | 0.1097933 | 0.4298823 | 0.3889727 | 19 | HDAC4/EHD1/CD9/SKI/MAML1/TANC1/NFATC2/SMYD3/MYH9/SORT1/ANKRD2/BCL2/NOTCH1/MEF2C/PLD3/FLOT1/SCGB3A1/CEACAM5/MYORG     |
| Biological Process | GO:0051341 | regulation of oxidoreductase activity               | 19/2279 | 117/18866 | 0.1097933 | 0.4298823 | 0.3889727 | 19 | GFI1/VDR/DNM2/TNF/GNAI2/NOS1AP/CDH3/WASL/NOSTRIN/SPHK2/RIPK3/POR/CNR2/MIR138-2/NOD2/AGTR1/NOSIP/SIRT3/PRKN           |
| Biological Process | GO:1904019 | epithelial cell apoptotic process                   | 19/2279 | 117/18866 | 0.1097933 | 0.4298823 | 0.3889727 | 19 | IL10/GSN/ANGPT1/TNF/TNFAIP3/MIR101-2/TGFBR2/THBS1/MIR24-2/TCF7L2/STK3/PRKCI/NFE2L2/ARRB2/SORT1/RB1/ANO6/BCL2L1/PLCG1 |

|                    |            |                                                     |         |           |           |           |           |    |                                                                                                                                                                                                                                                                                                                                                           |
|--------------------|------------|-----------------------------------------------------|---------|-----------|-----------|-----------|-----------|----|-----------------------------------------------------------------------------------------------------------------------------------------------------------------------------------------------------------------------------------------------------------------------------------------------------------------------------------------------------------|
| Biological Process | GO:0048880 | sensory system development                          | 56/2279 | 394/18866 | 0.1100322 | 0.4298823 | 0.3889727 | 56 | SPRED2/RXRA/PDE6A/FZR1/SLC25A25/LIMK2/MFSD2A/LPCAT1/CACNA1C/LRP5L/SKI/CRB1/SMAD3/ZEB2/SH3PXD2B/HIPK2/TGFBR2/MYH15/SLC44A4/NINJ1/DLL1/HDAC1/GNAT2/PAX2/FLT1/RDH10/RARA/NF1/CRYBB1/SP3/RARG/BMPR1B/WNT5B/GRHL2/IFT140/MEIS2/PRKCI/MYOM1/MEIS1/BCL2/RPGRIP1/ZHX2/PBX4/COL5A1/SDK2/BCAR3/NRL/PDGFRB/ARHG<br>EF15/TMOD1/ALDH1A2/INHBA/CABP4/TSKU/NPHP4/NECTIN1 |
| Biological Process | GO:0006171 | cAMP biosynthetic process                           | 3/2279  | 10/18866  | 0.1103295 | 0.4298823 | 0.3889727 | 3  | ADCY2/ADCY9/ADCY4                                                                                                                                                                                                                                                                                                                                         |
| Biological Process | GO:0006285 | base-excision repair, AP site formation             | 3/2279  | 10/18866  | 0.1103295 | 0.4298823 | 0.3889727 | 3  | UNG/NTHL1/MUTYH                                                                                                                                                                                                                                                                                                                                           |
| Biological Process | GO:0006547 | histidine metabolic process                         | 3/2279  | 10/18866  | 0.1103295 | 0.4298823 | 0.3889727 | 3  | HAL/MTHFD1/HNMT                                                                                                                                                                                                                                                                                                                                           |
| Biological Process | GO:0007084 | mitotic nuclear envelope reassembly                 | 3/2279  | 10/18866  | 0.1103295 | 0.4298823 | 0.3889727 | 3  | PPP2R1A/ANKLE2/BANF1                                                                                                                                                                                                                                                                                                                                      |
| Biological Process | GO:0009133 | nucleoside diphosphate biosynthetic process         | 3/2279  | 10/18866  | 0.1103295 | 0.4298823 | 0.3889727 | 3  | GUK1/AK2/AK5                                                                                                                                                                                                                                                                                                                                              |
| Biological Process | GO:0009396 | folic acid-containing compound biosynthetic process | 3/2279  | 10/18866  | 0.1103295 | 0.4298823 | 0.3889727 | 3  | MTHFD1L/MTHFS/MTHFD1                                                                                                                                                                                                                                                                                                                                      |
| Biological Process | GO:0016559 | peroxisome fission                                  | 3/2279  | 10/18866  | 0.1103295 | 0.4298823 | 0.3889727 | 3  | FIS1/DNM1L/PEX11B                                                                                                                                                                                                                                                                                                                                         |
| Biological Process | GO:0018026 | peptidyl-lysine monomethylation                     | 3/2279  | 10/18866  | 0.1103295 | 0.4298823 | 0.3889727 | 3  | SETD2/EEF1AKMT2/CSKMT                                                                                                                                                                                                                                                                                                                                     |

|                    |            |                                                       |        |          |           |           |           |   |                         |
|--------------------|------------|-------------------------------------------------------|--------|----------|-----------|-----------|-----------|---|-------------------------|
| Biological Process | GO:0019374 | galactolipid metabolic process                        | 3/2279 | 10/18866 | 0.1103295 | 0.4298823 | 0.3889727 | 3 | GALC/B4GALT3/FA2H       |
| Biological Process | GO:0021562 | vestibulocochlear nerve development                   | 3/2279 | 10/18866 | 0.1103295 | 0.4298823 | 0.3889727 | 3 | NRP2/ATP8B1/PAX2        |
| Biological Process | GO:0021859 | pyramidal neuron differentiation                      | 3/2279 | 10/18866 | 0.1103295 | 0.4298823 | 0.3889727 | 3 | DISC1/ZMIZ1/UNC5D       |
| Biological Process | GO:0030202 | heparin metabolic process                             | 3/2279 | 10/18866 | 0.1103295 | 0.4298823 | 0.3889727 | 3 | CSGALNACT1/ANGPT1/NDST1 |
| Biological Process | GO:0030953 | astral microtubule organization                       | 3/2279 | 10/18866 | 0.1103295 | 0.4298823 | 0.3889727 | 3 | LIMK2/NUMA1/EZR         |
| Biological Process | GO:0032661 | regulation of interleukin-18 production               | 3/2279 | 10/18866 | 0.1103295 | 0.4298823 | 0.3889727 | 3 | IL10/CD84/TLR9          |
| Biological Process | GO:0032815 | negative regulation of natural killer cell activation | 3/2279 | 10/18866 | 0.1103295 | 0.4298823 | 0.3889727 | 3 | FGR/HLA-F/PGLYRP1       |
| Biological Process | GO:0033314 | mitotic DNA replication checkpoint                    | 3/2279 | 10/18866 | 0.1103295 | 0.4298823 | 0.3889727 | 3 | HUS1/CLSPN/NAE1         |
| Biological Process | GO:0034154 | toll-like receptor 7 signaling pathway                | 3/2279 | 10/18866 | 0.1103295 | 0.4298823 | 0.3889727 | 3 | PIK3AP1/SCIMP/TREML4    |

|                    |            |                                                          |        |          |           |           |           |   |                      |
|--------------------|------------|----------------------------------------------------------|--------|----------|-----------|-----------|-----------|---|----------------------|
| Biological Process | GO:0034163 | regulation of toll-like receptor 9 signaling pathway     | 3/2279 | 10/18866 | 0.1103295 | 0.4298823 | 0.3889727 | 3 | GRAMD4/TLR9/RTN4     |
| Biological Process | GO:0035871 | protein K11-linked deubiquitination                      | 3/2279 | 10/18866 | 0.1103295 | 0.4298823 | 0.3889727 | 3 | TNFAIP3/OTUB2/VCIPI1 |
| Biological Process | GO:0035999 | tetrahydrofolate interconversion                         | 3/2279 | 10/18866 | 0.1103295 | 0.4298823 | 0.3889727 | 3 | MTHFD1L/MTHFS/MTHFD1 |
| Biological Process | GO:0042117 | monocyte activation                                      | 3/2279 | 10/18866 | 0.1103295 | 0.4298823 | 0.3889727 | 3 | AZU1/FOXP1/DYSF      |
| Biological Process | GO:0044351 | macropinocytosis                                         | 3/2279 | 10/18866 | 0.1103295 | 0.4298823 | 0.3889727 | 3 | DNM2/MAPKAPK3/DOCK2  |
| Biological Process | GO:0046487 | glyoxylate metabolic process                             | 3/2279 | 10/18866 | 0.1103295 | 0.4298823 | 0.3889727 | 3 | ALDH4A1/AGXT/HOGA1   |
| Biological Process | GO:0048251 | elastic fiber assembly                                   | 3/2279 | 10/18866 | 0.1103295 | 0.4298823 | 0.3889727 | 3 | MFAP4/MYH11/TNXB     |
| Biological Process | GO:0048739 | cardiac muscle fiber development                         | 3/2279 | 10/18866 | 0.1103295 | 0.4298823 | 0.3889727 | 3 | MYO18B/TTN/MYH11     |
| Biological Process | GO:0050861 | positive regulation of B cell receptor signaling pathway | 3/2279 | 10/18866 | 0.1103295 | 0.4298823 | 0.3889727 | 3 | FOXP1/PRKCH/PRKCB    |



|                    |            |                                                                |        |          |           |           |           |   |                    |
|--------------------|------------|----------------------------------------------------------------|--------|----------|-----------|-----------|-----------|---|--------------------|
| Biological Process | GO:0051124 | synaptic growth at neuromuscular junction                      | 3/2279 | 10/18866 | 0.1103295 | 0.4298823 | 0.3889727 | 3 | COLQ/APP/SHANK2    |
| Biological Process | GO:0070099 | regulation of chemokine-mediated signaling pathway             | 3/2279 | 10/18866 | 0.1103295 | 0.4298823 | 0.3889727 | 3 | CCL5/PADI2/SLIT3   |
| Biological Process | GO:0070862 | negative regulation of protein exit from endoplasmic reticulum | 3/2279 | 10/18866 | 0.1103295 | 0.4298823 | 0.3889727 | 3 | UBAC2/DERL2/SVIP   |
| Biological Process | GO:0072124 | regulation of glomerular mesangial cell proliferation          | 3/2279 | 10/18866 | 0.1103295 | 0.4298823 | 0.3889727 | 3 | PDGFD/IL6R/PDGFB   |
| Biological Process | GO:0097278 | complement-dependent cytotoxicity                              | 3/2279 | 10/18866 | 0.1103295 | 0.4298823 | 0.3889727 | 3 | CD55/RAB27A/CD59   |
| Biological Process | GO:0098598 | learned vocalization behavior or vocal learning                | 3/2279 | 10/18866 | 0.1103295 | 0.4298823 | 0.3889727 | 3 | NRXN1/HTT/NRXN2    |
| Biological Process | GO:0099532 | synaptic vesicle endosomal processing                          | 3/2279 | 10/18866 | 0.1103295 | 0.4298823 | 0.3889727 | 3 | ITSN1/DNM1L/AP3D1  |
| Biological Process | GO:0140042 | lipid droplet formation                                        | 3/2279 | 10/18866 | 0.1103295 | 0.4298823 | 0.3889727 | 3 | TMEM159/CDS2/BSCL2 |
| Biological Process | GO:1902946 | protein localization to early endosome                         | 3/2279 | 10/18866 | 0.1103295 | 0.4298823 | 0.3889727 | 3 | SORL1/MGAT3/EZR    |

|                    |            |                                                                 |         |           |           |           |           |    |                                                                                                                                                                                                                                                       |
|--------------------|------------|-----------------------------------------------------------------|---------|-----------|-----------|-----------|-----------|----|-------------------------------------------------------------------------------------------------------------------------------------------------------------------------------------------------------------------------------------------------------|
| Biological Process | GO:1904672 | regulation of somatic stem cell population maintenance          | 3/2279  | 10/18866  | 0.1103295 | 0.4298823 | 0.3889727 | 3  | MIR145/LBH/PAX2                                                                                                                                                                                                                                       |
| Biological Process | GO:1990535 | neuron projection maintenance                                   | 3/2279  | 10/18866  | 0.1103295 | 0.4298823 | 0.3889727 | 3  | DCTN1/APP/MAP1A                                                                                                                                                                                                                                       |
| Biological Process | GO:2000109 | regulation of macrophage apoptotic process                      | 3/2279  | 10/18866  | 0.1103295 | 0.4298823 | 0.3889727 | 3  | CCL5/NOD2/MEF2C                                                                                                                                                                                                                                       |
| Biological Process | GO:2000320 | negative regulation of T-helper 17 cell differentiation         | 3/2279  | 10/18866  | 0.1103295 | 0.4298823 | 0.3889727 | 3  | LOXL3/SMAD7/ZBTB7B                                                                                                                                                                                                                                    |
| Biological Process | GO:2000601 | positive regulation of Arp2/3 complex-mediated actin nucleation | 3/2279  | 10/18866  | 0.1103295 | 0.4298823 | 0.3889727 | 3  | WASL/NCKAP1/CYFIP1                                                                                                                                                                                                                                    |
| Biological Process | GO:0035966 | response to topologically incorrect protein                     | 31/2279 | 205/18866 | 0.1103812 | 0.4298823 | 0.3889727 | 31 | DCTN1/CALR/ERN1/PIK3R1/AMFR/MBTPS1/RHBDD2/NCK2/YIF1A/CUL3/THBS1/EDEM1/DERL2/ZBTB17/PDIA5/HSPA4L/CLU/UBE2J2/CLGN/F12/POMT2/COP5/EDEM2/CREB3L2/NFE2L2/ADD1/TOR1B/KLHDC3/SEC31A/ACADVL/PRKN                                                              |
| Biological Process | GO:0031330 | negative regulation of cellular catabolic process               | 39/2279 | 265/18866 | 0.1109413 | 0.4298823 | 0.3889727 | 39 | TRIM39/FOXK1/TIMP2/SORL1/IL10/MFSD2A/SLC11A1/PAM16/BMF/MIR199A1/GPLD1/SUFU/HIPK2/UBAC2/LARP1/MGAT3/PKP1/USP36/DERL2/FEZ2/CLEC16A/ACACB/PSMF1/TBC1D14/NPC1/NBAS/BCL2/MIR199A2/MAP1A/PAIP1/TSC2/SECISBP2/SYNCRIP/BAG5/EIF4G1/SVIP/TENT5C/TENT5A/MARCHF7 |
| Biological Process | GO:0006641 | triglyceride metabolic process                                  | 18/2279 | 110/18866 | 0.1110109 | 0.4298823 | 0.3889727 | 18 | PNPLA2/SORL1/MGLL/ACSL1/MFSD2A/LIPC/GPLD1/NR1H2/ATG14/GNB3/FABP6/CAT/LMF1/ABHD5/PCK2/SREBF1/CPT1A/LPIN1                                                                                                                                               |
| Biological Process | GO:0000302 | response to reactive oxygen species                             | 35/2279 | 235/18866 | 0.1111386 | 0.4298823 | 0.3889727 | 35 | TRPM2/MPO/IL10/LCN2/MYB/SLC8A1/DNM2/TNF/TRAF2/TNFAIP3/CAMKK2/RIPK1/PXN/PAX2/ZNF580/FER/HBB/AQP1/RIPK3/STK24/PDGFD/CAT/ETS1/NFE2L2/IL18RAP/BCL2/UBE3A/GLRX2/PDGFRB/FOXO1/RELA/TXNRD2/SIRT3/MB/PRKAA1                                                   |

|                    |            |                                                      |         |           |           |           |           |    |                                                                                                                                                                                                                                                                                                                                                                                          |
|--------------------|------------|------------------------------------------------------|---------|-----------|-----------|-----------|-----------|----|------------------------------------------------------------------------------------------------------------------------------------------------------------------------------------------------------------------------------------------------------------------------------------------------------------------------------------------------------------------------------------------|
| Biological Process | GO:0035335 | peptidyl-tyrosine dephosphorylation                  | 17/2279 | 103/18866 | 0.1120841 | 0.4298823 | 0.3889727 | 17 | SSH1/PTPRE/DUSP14/UBASH3B/DUSP22/PGP/PTPN6/SSH3/DUSP28/PTPRN2/CDC25A/PTPRJ/PTPRC/PALD1/DUSP3/CDC14A/PTPRU                                                                                                                                                                                                                                                                                |
| Biological Process | GO:0048709 | oligodendrocyte differentiation                      | 17/2279 | 103/18866 | 0.1120841 | 0.4298823 | 0.3889727 | 17 | CD9/PPARG/GSN/TNFRSF1B/RHEB/EIF2B5/CLU/TNFRSF21/HDAC1/NF1/CSK/WDR1/NOTCH1/TSPAN2/FA2H/CNTNAP1/ERCC2                                                                                                                                                                                                                                                                                      |
| Biological Process | GO:0060079 | excitatory postsynaptic potential                    | 17/2279 | 103/18866 | 0.1120841 | 0.4298823 | 0.3889727 | 17 | PRKCZ/SSH1/ZMYND8/BAIAP2/APP/NRXN1/GHRL/SH3GL1/MAPK8IP2/ARRB2/S1PR2/P2RX1/MEF2C/SHANK2/SLC29A1/P2RX5/CUX2                                                                                                                                                                                                                                                                                |
| Biological Process | GO:0070498 | interleukin-1-mediated signaling pathway             | 17/2279 | 103/18866 | 0.1120841 | 0.4298823 | 0.3889727 | 17 | VRK2/TOLLIP/MAP3K3/IL1R1/MIR27A/RPS6KA4/IL1RN/UBE2V1/PSMF1/PLCB1/IRAK2/NOD2/PSMB7/RELA/FBXW11/PELI1/PSMD13                                                                                                                                                                                                                                                                               |
| Biological Process | GO:0032102 | negative regulation of response to external stimulus | 61/2279 | 433/18866 | 0.1122515 | 0.4298823 | 0.3889727 | 61 | ELANE/SEMA6B/ABR/PLAU/IL10/CD9/TRIM38/PPARG/C1QTNF3/MIR140/MIR145/TNFRSF1B/NLRP3/SMAD3/MEFV/TNF/UBASH3B/SMPDL3B/TNFAIP3/AOAH/FPR2/SERPINB2/SEMA4A/PADI2/THBS1/SEMA4B/C5AR2/HLA-F/TNFAIP6/TNFRSF1A/F12/KREMEN1/SEMA4D/NRXN1/CXCL17/NR1H2/PGLYRP1/SEC14L1/GHRL/PTPRC/GRN/PDGFB/NLRC5/BCR/CNR2/ETS1/ARRB2/MIR138-2/RB1/NOTCH1/DUSP3/CPB2/LTF/CHD8/TRIB1/TYRO3/ADTRP/CD96/CERS2/INPP5F/ILRUN |
| Biological Process | GO:0006027 | glycosaminoglycan catabolic process                  | 11/2279 | 61/18866  | 0.1122856 | 0.4298823 | 0.3889727 | 11 | HEXB/GALNS/LYG2/SDC2/TGFB1/STAB2/PGLYRP1/LYVE1/ARSB/PGLYRP4/CEMIP2                                                                                                                                                                                                                                                                                                                       |
| Biological Process | GO:0061512 | protein localization to cilium                       | 11/2279 | 61/18866  | 0.1122856 | 0.4298823 | 0.3889727 | 11 | EHD1/CSNK1D/TULP2/CCDC66/LZTFL1/IFT140/INPP5E/TTC21B/ZNF423/NPHP4/CPLANE1                                                                                                                                                                                                                                                                                                                |
| Biological Process | GO:0061912 | selective autophagy                                  | 11/2279 | 61/18866  | 0.1122856 | 0.4298823 | 0.3889727 | 11 | SPTLC2/VPS13D/WIPI2/SMURF1/CLEC16A/HTT/ATG14/TSC2/WDR81/STING1/PRKN                                                                                                                                                                                                                                                                                                                      |
| Biological Process | GO:0010812 | negative regulation of cell-substrate adhesion       | 12/2279 | 68/18866  | 0.113447  | 0.4298823 | 0.3889727 | 12 | TBCD/TACSTD2/KANK1/ITGB1BP1/PIK3R1/DUSP22/THBS1/ACTN4/NF1/NOTCH1/CORO1C/GCNT2                                                                                                                                                                                                                                                                                                            |

|                    |            |                                                                                      |         |          |           |           |           |    |                                                                                                 |
|--------------------|------------|--------------------------------------------------------------------------------------|---------|----------|-----------|-----------|-----------|----|-------------------------------------------------------------------------------------------------|
| Biological Process | GO:0051148 | negative regulation of muscle cell differentiation                                   | 12/2279 | 68/18866 | 0.113447  | 0.4298823 | 0.3889727 | 12 | HDAC4/CTDP1/MIR199A1/NFATC2/NFATC1/DLL1/PDGFB/ANKRD2/MIR199A2/NOTCH1/DNMT1/CEACAM5              |
| Biological Process | GO:0022404 | molting cycle process                                                                | 15/2279 | 89/18866 | 0.1136298 | 0.4298823 | 0.3889727 | 15 | TNF/KRT17/RBPJ/LRIG1/HDAC1/CDH3/MYO5A/NF1/NUMA1/BCL2/NOTCH1/TGM3/RELA/INHBA/ERCC2               |
| Biological Process | GO:0022405 | hair cycle process                                                                   | 15/2279 | 89/18866 | 0.1136298 | 0.4298823 | 0.3889727 | 15 | TNF/KRT17/RBPJ/LRIG1/HDAC1/CDH3/MYO5A/NF1/NUMA1/BCL2/NOTCH1/TGM3/RELA/INHBA/ERCC2               |
| Biological Process | GO:1903845 | negative regulation of cellular response to transforming growth factor beta stimulus | 15/2279 | 89/18866 | 0.1136298 | 0.4298823 | 0.3889727 | 15 | LTBP1/SPRED2/SKI/SMAD3/LDLRAD4/DNM2/CHST11/TGFBR2/SMAD7/TGFB1/SMURF1/TGFB111/HTRA4/PRDM16/HTRA3 |
| Biological Process | GO:0018146 | keratan sulfate biosynthetic process                                                 | 6/2279  | 28/18866 | 0.113632  | 0.4298823 | 0.3889727 | 6  | CHST2/ST3GAL4/B4GALT3/ST3GAL2/B3GNT2/B4GAT1                                                     |
| Biological Process | GO:0030194 | positive regulation of blood coagulation                                             | 6/2279  | 28/18866 | 0.113632  | 0.4298823 | 0.3889727 | 6  | THBS1/F12/NFE2L2/CPB2/F2R/ANO6                                                                  |
| Biological Process | GO:0034067 | protein localization to Golgi apparatus                                              | 6/2279  | 28/18866 | 0.113632  | 0.4298823 | 0.3889727 | 6  | SORL1/CSNK1D/VPS13D/BICD2/NUMA1/RIPOR1                                                          |
| Biological Process | GO:0045606 | positive regulation of epidermal cell differentiation                                | 6/2279  | 28/18866 | 0.113632  | 0.4298823 | 0.3889727 | 6  | VDR/PRKCH/NUMA1/NOTCH1/ZBED2/MACROH2A2                                                          |
| Biological Process | GO:0045830 | positive regulation of isotype switching                                             | 6/2279  | 28/18866 | 0.113632  | 0.4298823 | 0.3889727 | 6  | TGFB1/PTPRC/TP53BP1/TNFSF13/PAXIP1/NSD2                                                         |

|                    |            |                                                          |        |          |           |           |           |   |                                       |
|--------------------|------------|----------------------------------------------------------|--------|----------|-----------|-----------|-----------|---|---------------------------------------|
| Biological Process | GO:0048753 | pigment granule organization                             | 6/2279 | 28/18866 | 0.113632  | 0.4298823 | 0.3889727 | 6 | LYST/KIF13A/ZEB2/BCL2/AP3D1/DTNBP1    |
| Biological Process | GO:1900048 | positive regulation of hemostasis                        | 6/2279 | 28/18866 | 0.113632  | 0.4298823 | 0.3889727 | 6 | THBS1/F12/NFE2L2/CPB2/F2R/ANO6        |
| Biological Process | GO:2000171 | negative regulation of dendrite development              | 6/2279 | 28/18866 | 0.113632  | 0.4298823 | 0.3889727 | 6 | YWHAH/BCL11A/ASAP1/RAPGEF2/DNM3/UBE3A |
| Biological Process | GO:2000463 | positive regulation of excitatory postsynaptic potential | 6/2279 | 28/18866 | 0.113632  | 0.4298823 | 0.3889727 | 6 | PRKCZ/SSH1/BAIAP2/NRXN1/SHANK2/CUX2   |
| Biological Process | GO:0000320 | re-entry into mitotic cell cycle                         | 2/2279 | 5/18866  | 0.1137383 | 0.4298823 | 0.3889727 | 2 | MIR199A1/MIR199A2                     |
| Biological Process | GO:0001887 | selenium compound metabolic process                      | 2/2279 | 5/18866  | 0.1137383 | 0.4298823 | 0.3889727 | 2 | SCLY/MAT1A                            |
| Biological Process | GO:0002175 | protein localization to paranode region of axon          | 2/2279 | 5/18866  | 0.1137383 | 0.4298823 | 0.3889727 | 2 | EPB41L3/CNTNAP1                       |
| Biological Process | GO:0002513 | tolerance induction to self antigen                      | 2/2279 | 5/18866  | 0.1137383 | 0.4298823 | 0.3889727 | 2 | TGFBR2/BLK                            |
| Biological Process | GO:0002677 | negative regulation of chronic inflammatory response     | 2/2279 | 5/18866  | 0.1137383 | 0.4298823 | 0.3889727 | 2 | IL10/TNFAIP3                          |

|                    |            |                                                                                       |        |         |           |           |           |   |               |
|--------------------|------------|---------------------------------------------------------------------------------------|--------|---------|-----------|-----------|-----------|---|---------------|
| Biological Process | GO:0002925 | positive regulation of humoral immune response mediated by circulating immunoglobulin | 2/2279 | 5/18866 | 0.1137383 | 0.4298823 | 0.3889727 | 2 | TNF/PTPRC     |
| Biological Process | GO:0003186 | tricuspid valve morphogenesis                                                         | 2/2279 | 5/18866 | 0.1137383 | 0.4298823 | 0.3889727 | 2 | ZFPM1/TGFBR2  |
| Biological Process | GO:0003406 | retinal pigment epithelium development                                                | 2/2279 | 5/18866 | 0.1137383 | 0.4298823 | 0.3889727 | 2 | MFSD2A/PAX2   |
| Biological Process | GO:0006003 | fructose 2,6-bisphosphate metabolic process                                           | 2/2279 | 5/18866 | 0.1137383 | 0.4298823 | 0.3889727 | 2 | PFKFB4/PFKFB3 |
| Biological Process | GO:0006172 | ADP biosynthetic process                                                              | 2/2279 | 5/18866 | 0.1137383 | 0.4298823 | 0.3889727 | 2 | AK2/AK5       |
| Biological Process | GO:0006572 | tyrosine catabolic process                                                            | 2/2279 | 5/18866 | 0.1137383 | 0.4298823 | 0.3889727 | 2 | HGD/FAH       |
| Biological Process | GO:0007386 | compartment pattern specification                                                     | 2/2279 | 5/18866 | 0.1137383 | 0.4298823 | 0.3889727 | 2 | DLL1/NOTCH1   |
| Biological Process | GO:0008291 | acetylcholine metabolic process                                                       | 2/2279 | 5/18866 | 0.1137383 | 0.4298823 | 0.3889727 | 2 | COLQ/SLC44A4  |
| Biological Process | GO:0009153 | purine deoxyribonucleotide biosynthetic process                                       | 2/2279 | 5/18866 | 0.1137383 | 0.4298823 | 0.3889727 | 2 | GUK1/AK5      |

|                    |            |                                                                    |        |         |           |           |           |   |                 |
|--------------------|------------|--------------------------------------------------------------------|--------|---------|-----------|-----------|-----------|---|-----------------|
| Biological Process | GO:0009256 | 10-formyltetrahydrofolate metabolic process                        | 2/2279 | 5/18866 | 0.1137383 | 0.4298823 | 0.3889727 | 2 | MTHFD1L/MTHFD1  |
| Biological Process | GO:0009912 | auditory receptor cell fate commitment                             | 2/2279 | 5/18866 | 0.1137383 | 0.4298823 | 0.3889727 | 2 | RBPJ/NOTCH1     |
| Biological Process | GO:0010815 | bradykinin catabolic process                                       | 2/2279 | 5/18866 | 0.1137383 | 0.4298823 | 0.3889727 | 2 | CTSH/XPNPEP1    |
| Biological Process | GO:0010897 | negative regulation of triglyceride catabolic process              | 2/2279 | 5/18866 | 0.1137383 | 0.4298823 | 0.3889727 | 2 | SORL1/GPLD1     |
| Biological Process | GO:0014722 | regulation of skeletal muscle contraction by calcium ion signaling | 2/2279 | 5/18866 | 0.1137383 | 0.4298823 | 0.3889727 | 2 | GSTO1/CASQ1     |
| Biological Process | GO:0015691 | cadmium ion transport                                              | 2/2279 | 5/18866 | 0.1137383 | 0.4298823 | 0.3889727 | 2 | SLC11A1/SLC11A2 |
| Biological Process | GO:0015827 | tryptophan transport                                               | 2/2279 | 5/18866 | 0.1137383 | 0.4298823 | 0.3889727 | 2 | SLC7A5/SLC7A8   |
| Biological Process | GO:0018057 | peptidyl-lysine oxidation                                          | 2/2279 | 5/18866 | 0.1137383 | 0.4298823 | 0.3889727 | 2 | LOXL3/LOXL4     |
| Biological Process | GO:0019732 | antifungal humoral response                                        | 2/2279 | 5/18866 | 0.1137383 | 0.4298823 | 0.3889727 | 2 | DEFA4/LTF       |

|                    |            |                                                                 |        |         |           |           |           |   |                 |
|--------------------|------------|-----------------------------------------------------------------|--------|---------|-----------|-----------|-----------|---|-----------------|
| Biological Process | GO:0021650 | vestibulocochlear nerve formation                               | 2/2279 | 5/18866 | 0.1137383 | 0.4298823 | 0.3889727 | 2 | ATP8B1/PAX2     |
| Biological Process | GO:0032237 | activation of store-operated calcium channel activity           | 2/2279 | 5/18866 | 0.1137383 | 0.4298823 | 0.3889727 | 2 | STIMATE/CRACR2A |
| Biological Process | GO:0032889 | regulation of vacuole fusion, non-autophagic                    | 2/2279 | 5/18866 | 0.1137383 | 0.4298823 | 0.3889727 | 2 | ENO1/ENO3       |
| Biological Process | GO:0032907 | transforming growth factor beta3 production                     | 2/2279 | 5/18866 | 0.1137383 | 0.4298823 | 0.3889727 | 2 | CREB1/SMAD3     |
| Biological Process | GO:0032910 | regulation of transforming growth factor beta3 production       | 2/2279 | 5/18866 | 0.1137383 | 0.4298823 | 0.3889727 | 2 | CREB1/SMAD3     |
| Biological Process | GO:0033869 | nucleoside bisphosphate catabolic process                       | 2/2279 | 5/18866 | 0.1137383 | 0.4298823 | 0.3889727 | 2 | ACOT7/ACAT1     |
| Biological Process | GO:0034031 | ribonucleoside bisphosphate catabolic process                   | 2/2279 | 5/18866 | 0.1137383 | 0.4298823 | 0.3889727 | 2 | ACOT7/ACAT1     |
| Biological Process | GO:0034034 | purine nucleoside bisphosphate catabolic process                | 2/2279 | 5/18866 | 0.1137383 | 0.4298823 | 0.3889727 | 2 | ACOT7/ACAT1     |
| Biological Process | GO:0034093 | positive regulation of maintenance of sister chromatid cohesion | 2/2279 | 5/18866 | 0.1137383 | 0.4298823 | 0.3889727 | 2 | NSMCE2/SLF1     |



|                    |            |                                                                                |        |         |           |           |           |   |               |
|--------------------|------------|--------------------------------------------------------------------------------|--------|---------|-----------|-----------|-----------|---|---------------|
| Biological Process | GO:0034184 | positive regulation of maintenance of mitotic sister chromatid cohesion        | 2/2279 | 5/18866 | 0.1137383 | 0.4298823 | 0.3889727 | 2 | NSMCE2/SLF1   |
| Biological Process | GO:0034398 | telomere tethering at nuclear periphery                                        | 2/2279 | 5/18866 | 0.1137383 | 0.4298823 | 0.3889727 | 2 | RAD21L1/TERB2 |
| Biological Process | GO:0035385 | Roundabout signaling pathway                                                   | 2/2279 | 5/18866 | 0.1137383 | 0.4298823 | 0.3889727 | 2 | MYO9B/SLIT3   |
| Biological Process | GO:0035441 | cell migration involved in vasculogenesis                                      | 2/2279 | 5/18866 | 0.1137383 | 0.4298823 | 0.3889727 | 2 | SETD2/PDGFRB  |
| Biological Process | GO:0035787 | cell migration involved in kidney development                                  | 2/2279 | 5/18866 | 0.1137383 | 0.4298823 | 0.3889727 | 2 | PDGFB/PDGFRB  |
| Biological Process | GO:0035977 | protein deglycosylation involved in glycoprotein catabolic process             | 2/2279 | 5/18866 | 0.1137383 | 0.4298823 | 0.3889727 | 2 | EDEM1/EDEM2   |
| Biological Process | GO:0036337 | Fas signaling pathway                                                          | 2/2279 | 5/18866 | 0.1137383 | 0.4298823 | 0.3889727 | 2 | ZDHHC7/SP100  |
| Biological Process | GO:0036493 | positive regulation of translation in response to endoplasmic reticulum stress | 2/2279 | 5/18866 | 0.1137383 | 0.4298823 | 0.3889727 | 2 | NCK2/EIF4G1   |
| Biological Process | GO:0040016 | embryonic cleavage                                                             | 2/2279 | 5/18866 | 0.1137383 | 0.4298823 | 0.3889727 | 2 | CUL3/ERCC2    |

|                    |            |                                                   |        |         |           |           |           |   |               |
|--------------------|------------|---------------------------------------------------|--------|---------|-----------|-----------|-----------|---|---------------|
| Biological Process | GO:0042144 | vacuole fusion, non-autophagic                    | 2/2279 | 5/18866 | 0.1137383 | 0.4298823 | 0.3889727 | 2 | ENO1/ENO3     |
| Biological Process | GO:0042262 | DNA protection                                    | 2/2279 | 5/18866 | 0.1137383 | 0.4298823 | 0.3889727 | 2 | CBS/GLRX2     |
| Biological Process | GO:0042816 | vitamin B6 metabolic process                      | 2/2279 | 5/18866 | 0.1137383 | 0.4298823 | 0.3889727 | 2 | PDXK/AOX1     |
| Biological Process | GO:0044821 | meiotic telomere tethering at nuclear periphery   | 2/2279 | 5/18866 | 0.1137383 | 0.4298823 | 0.3889727 | 2 | RAD21L1/TERB2 |
| Biological Process | GO:0045053 | protein retention in Golgi apparatus              | 2/2279 | 5/18866 | 0.1137383 | 0.4298823 | 0.3889727 | 2 | SORL1/VPS13D  |
| Biological Process | GO:0045636 | positive regulation of melanocyte differentiation | 2/2279 | 5/18866 | 0.1137383 | 0.4298823 | 0.3889727 | 2 | ZEB2/BCL2     |
| Biological Process | GO:0045900 | negative regulation of translational elongation   | 2/2279 | 5/18866 | 0.1137383 | 0.4298823 | 0.3889727 | 2 | CPEB3/SHFL    |
| Biological Process | GO:0045990 | carbon catabolite regulation of transcription     | 2/2279 | 5/18866 | 0.1137383 | 0.4298823 | 0.3889727 | 2 | NCOA1/USF2    |
| Biological Process | GO:0045991 | carbon catabolite activation of transcription     | 2/2279 | 5/18866 | 0.1137383 | 0.4298823 | 0.3889727 | 2 | NCOA1/USF2    |

|                    |            |                                                  |        |         |           |           |           |   |              |
|--------------------|------------|--------------------------------------------------|--------|---------|-----------|-----------|-----------|---|--------------|
| Biological Process | GO:0046104 | thymidine metabolic process                      | 2/2279 | 5/18866 | 0.1137383 | 0.4298823 | 0.3889727 | 2 | TK2/TK1      |
| Biological Process | GO:0046125 | pyrimidine deoxyribonucleoside metabolic process | 2/2279 | 5/18866 | 0.1137383 | 0.4298823 | 0.3889727 | 2 | TK2/TK1      |
| Biological Process | GO:0046136 | positive regulation of vitamin metabolic process | 2/2279 | 5/18866 | 0.1137383 | 0.4298823 | 0.3889727 | 2 | TNF/RDH10    |
| Biological Process | GO:0048254 | snoRNA localization                              | 2/2279 | 5/18866 | 0.1137383 | 0.4298823 | 0.3889727 | 2 | PIH1D1/FBL   |
| Biological Process | GO:0048669 | collateral sprouting in absence of injury        | 2/2279 | 5/18866 | 0.1137383 | 0.4298823 | 0.3889727 | 2 | APP/SPART    |
| Biological Process | GO:0048859 | formation of anatomical boundary                 | 2/2279 | 5/18866 | 0.1137383 | 0.4298823 | 0.3889727 | 2 | NODAL/NTF4   |
| Biological Process | GO:0060040 | retinal bipolar neuron differentiation           | 2/2279 | 5/18866 | 0.1137383 | 0.4298823 | 0.3889727 | 2 | ZHX2/CABP4   |
| Biological Process | GO:0060120 | inner ear receptor cell fate commitment          | 2/2279 | 5/18866 | 0.1137383 | 0.4298823 | 0.3889727 | 2 | RBPJ/NOTCH1  |
| Biological Process | GO:0060374 | mast cell differentiation                        | 2/2279 | 5/18866 | 0.1137383 | 0.4298823 | 0.3889727 | 2 | ZFPM1/PIK3CD |

|                    |            |                                                            |        |         |           |           |           |   |  |                 |
|--------------------|------------|------------------------------------------------------------|--------|---------|-----------|-----------|-----------|---|--|-----------------|
| Biological Process | GO:0060398 | regulation of growth hormone receptor signaling pathway    | 2/2279 | 5/18866 | 0.1137383 | 0.4298823 | 0.3889727 | 2 |  | GHRL/MBD5       |
| Biological Process | GO:0061588 | calcium activated phospholipid scrambling                  | 2/2279 | 5/18866 | 0.1137383 | 0.4298823 | 0.3889727 | 2 |  | ANO7/ANO6       |
| Biological Process | GO:0061590 | calcium activated phosphatidylcholine scrambling           | 2/2279 | 5/18866 | 0.1137383 | 0.4298823 | 0.3889727 | 2 |  | ANO7/ANO6       |
| Biological Process | GO:0061591 | calcium activated galactosylceramide scrambling            | 2/2279 | 5/18866 | 0.1137383 | 0.4298823 | 0.3889727 | 2 |  | ANO7/ANO6       |
| Biological Process | GO:0061737 | leukotriene signaling pathway                              | 2/2279 | 5/18866 | 0.1137383 | 0.4298823 | 0.3889727 | 2 |  | LTB4R2/LTB4R    |
| Biological Process | GO:0070197 | meiotic attachment of telomere to nuclear envelope         | 2/2279 | 5/18866 | 0.1137383 | 0.4298823 | 0.3889727 | 2 |  | RAD21L1/TERB2   |
| Biological Process | GO:0070574 | cadmium ion transmembrane transport                        | 2/2279 | 5/18866 | 0.1137383 | 0.4298823 | 0.3889727 | 2 |  | SLC11A1/SLC11A2 |
| Biological Process | GO:0070940 | dephosphorylation of RNA polymerase II C-terminal domain   | 2/2279 | 5/18866 | 0.1137383 | 0.4298823 | 0.3889727 | 2 |  | CTDP1/RPRD1B    |
| Biological Process | GO:0071033 | nuclear retention of pre-mRNA at the site of transcription | 2/2279 | 5/18866 | 0.1137383 | 0.4298823 | 0.3889727 | 2 |  | EXOSC2/PCID2    |

|                    |            |                                                          |        |         |           |           |           |   |                 |
|--------------------|------------|----------------------------------------------------------|--------|---------|-----------|-----------|-----------|---|-----------------|
| Biological Process | GO:0071205 | protein localization to juxtapanode region of axon       | 2/2279 | 5/18866 | 0.1137383 | 0.4298823 | 0.3889727 | 2 | EPB41L3/CNTNAP1 |
| Biological Process | GO:0071680 | response to indole-3-methanol                            | 2/2279 | 5/18866 | 0.1137383 | 0.4298823 | 0.3889727 | 2 | JUP/CDH1        |
| Biological Process | GO:0071681 | cellular response to indole-3-methanol                   | 2/2279 | 5/18866 | 0.1137383 | 0.4298823 | 0.3889727 | 2 | JUP/CDH1        |
| Biological Process | GO:0071895 | odontoblast differentiation                              | 2/2279 | 5/18866 | 0.1137383 | 0.4298823 | 0.3889727 | 2 | CEBPB/FAM20C    |
| Biological Process | GO:0071922 | regulation of cohesin loading                            | 2/2279 | 5/18866 | 0.1137383 | 0.4298823 | 0.3889727 | 2 | RB1/CDC45       |
| Biological Process | GO:0072223 | metanephric glomerular mesangium development             | 2/2279 | 5/18866 | 0.1137383 | 0.4298823 | 0.3889727 | 2 | PDGFB/PDGFRB    |
| Biological Process | GO:0072385 | minus-end-directed organelle transport along microtubule | 2/2279 | 5/18866 | 0.1137383 | 0.4298823 | 0.3889727 | 2 | DYNC1H1/BICD2   |
| Biological Process | GO:0072656 | maintenance of protein location in mitochondrion         | 2/2279 | 5/18866 | 0.1137383 | 0.4298823 | 0.3889727 | 2 | HK1/HK2         |
| Biological Process | GO:0072708 | response to sorbitol                                     | 2/2279 | 5/18866 | 0.1137383 | 0.4298823 | 0.3889727 | 2 | MAP2K6/KAT7     |

|                    |            |                                                                                                  |        |         |           |           |           |   |               |
|--------------------|------------|--------------------------------------------------------------------------------------------------|--------|---------|-----------|-----------|-----------|---|---------------|
| Biological Process | GO:0090156 | cellular sphingolipid homeostasis                                                                | 2/2279 | 5/18866 | 0.1137383 | 0.4298823 | 0.3889727 | 2 | ORMDL3/RTN4   |
| Biological Process | GO:0090679 | cell differentiation involved in phenotypic switching                                            | 2/2279 | 5/18866 | 0.1137383 | 0.4298823 | 0.3889727 | 2 | MIR140/DNMT1  |
| Biological Process | GO:0097240 | chromosome attachment to the nuclear envelope                                                    | 2/2279 | 5/18866 | 0.1137383 | 0.4298823 | 0.3889727 | 2 | RAD21L1/TERB2 |
| Biological Process | GO:0097466 | ubiquitin-dependent glycoprotein ERAD pathway                                                    | 2/2279 | 5/18866 | 0.1137383 | 0.4298823 | 0.3889727 | 2 | EDEM1/EDEM2   |
| Biological Process | GO:0097576 | vacuole fusion                                                                                   | 2/2279 | 5/18866 | 0.1137383 | 0.4298823 | 0.3889727 | 2 | ENO1/ENO3     |
| Biological Process | GO:0106071 | positive regulation of adenylate cyclase-activating G protein-coupled receptor signaling pathway | 2/2279 | 5/18866 | 0.1137383 | 0.4298823 | 0.3889727 | 2 | PRKCA/MRAP    |
| Biological Process | GO:0106104 | regulation of glutamate receptor clustering                                                      | 2/2279 | 5/18866 | 0.1137383 | 0.4298823 | 0.3889727 | 2 | SSH1/ZDHHC2   |
| Biological Process | GO:0120180 | cell-substrate junction disassembly                                                              | 2/2279 | 5/18866 | 0.1137383 | 0.4298823 | 0.3889727 | 2 | IQSEC1/DUSP3  |
| Biological Process | GO:0120181 | focal adhesion disassembly                                                                       | 2/2279 | 5/18866 | 0.1137383 | 0.4298823 | 0.3889727 | 2 | IQSEC1/DUSP3  |

|                    |            |                                                                     |        |         |           |           |           |   |               |
|--------------------|------------|---------------------------------------------------------------------|--------|---------|-----------|-----------|-----------|---|---------------|
| Biological Process | GO:0120182 | regulation of focal adhesion disassembly                            | 2/2279 | 5/18866 | 0.1137383 | 0.4298823 | 0.3889727 | 2 | IQSEC1/DUSP3  |
| Biological Process | GO:0120183 | positive regulation of focal adhesion disassembly                   | 2/2279 | 5/18866 | 0.1137383 | 0.4298823 | 0.3889727 | 2 | IQSEC1/DUSP3  |
| Biological Process | GO:1900060 | negative regulation of ceramide biosynthetic process                | 2/2279 | 5/18866 | 0.1137383 | 0.4298823 | 0.3889727 | 2 | ORMDL3/PRKAA1 |
| Biological Process | GO:1900113 | negative regulation of histone H3-K9 trimethylation                 | 2/2279 | 5/18866 | 0.1137383 | 0.4298823 | 0.3889727 | 2 | KDM4C/PIH1D1  |
| Biological Process | GO:1900619 | acetate ester metabolic process                                     | 2/2279 | 5/18866 | 0.1137383 | 0.4298823 | 0.3889727 | 2 | COLQ/SLC44A4  |
| Biological Process | GO:1901628 | positive regulation of postsynaptic membrane organization           | 2/2279 | 5/18866 | 0.1137383 | 0.4298823 | 0.3889727 | 2 | SSH1/ZDHHC2   |
| Biological Process | GO:1902617 | response to fluoride                                                | 2/2279 | 5/18866 | 0.1137383 | 0.4298823 | 0.3889727 | 2 | FIS1/FOXO1    |
| Biological Process | GO:1902731 | negative regulation of chondrocyte proliferation                    | 2/2279 | 5/18866 | 0.1137383 | 0.4298823 | 0.3889727 | 2 | SMAD7/BMPRI1  |
| Biological Process | GO:1903297 | regulation of hypoxia-induced intrinsic apoptotic signaling pathway | 2/2279 | 5/18866 | 0.1137383 | 0.4298823 | 0.3889727 | 2 | ENO1/NOL3     |

|                    |            |                                                                                                       |        |         |           |           |           |   |               |
|--------------------|------------|-------------------------------------------------------------------------------------------------------|--------|---------|-----------|-----------|-----------|---|---------------|
| Biological Process | GO:1903298 | negative regulation of hypoxia-induced intrinsic apoptotic signaling pathway                          | 2/2279 | 5/18866 | 0.1137383 | 0.4298823 | 0.3889727 | 2 | ENO1/NOL3     |
| Biological Process | GO:1904382 | mannose trimming involved in glycoprotein ERAD pathway                                                | 2/2279 | 5/18866 | 0.1137383 | 0.4298823 | 0.3889727 | 2 | EDEM1/EDEM2   |
| Biological Process | GO:1904502 | regulation of lipophagy                                                                               | 2/2279 | 5/18866 | 0.1137383 | 0.4298823 | 0.3889727 | 2 | SPTLC2/HTT    |
| Biological Process | GO:1904504 | positive regulation of lipophagy                                                                      | 2/2279 | 5/18866 | 0.1137383 | 0.4298823 | 0.3889727 | 2 | SPTLC2/HTT    |
| Biological Process | GO:1904673 | negative regulation of somatic stem cell population maintenance                                       | 2/2279 | 5/18866 | 0.1137383 | 0.4298823 | 0.3889727 | 2 | MIR145/PAX2   |
| Biological Process | GO:1904717 | regulation of AMPA glutamate receptor clustering                                                      | 2/2279 | 5/18866 | 0.1137383 | 0.4298823 | 0.3889727 | 2 | SSH1/ZDHHC2   |
| Biological Process | GO:1904906 | positive regulation of endothelial cell-matrix adhesion via fibronectin                               | 2/2279 | 5/18866 | 0.1137383 | 0.4298823 | 0.3889727 | 2 | RIN2/CEACAM6  |
| Biological Process | GO:1904956 | regulation of midbrain dopaminergic neuron differentiation                                            | 2/2279 | 5/18866 | 0.1137383 | 0.4298823 | 0.3889727 | 2 | CSNK1D/CSNK1E |
| Biological Process | GO:1905007 | positive regulation of epithelial to mesenchymal transition involved in endocardial cushion formation | 2/2279 | 5/18866 | 0.1137383 | 0.4298823 | 0.3889727 | 2 | TGFBR2/ENG    |



|                    |            |                                                                                                       |        |         |           |           |           |   |               |
|--------------------|------------|-------------------------------------------------------------------------------------------------------|--------|---------|-----------|-----------|-----------|---|---------------|
| Biological Process | GO:1905232 | cellular response to L-glutamate                                                                      | 2/2279 | 5/18866 | 0.1137383 | 0.4298823 | 0.3889727 | 2 | BCL11A/BAIAP2 |
| Biological Process | GO:1905420 | vascular associated smooth muscle cell differentiation involved in phenotypic switching               | 2/2279 | 5/18866 | 0.1137383 | 0.4298823 | 0.3889727 | 2 | MIR140/DNMT1  |
| Biological Process | GO:1905451 | positive regulation of Fc-gamma receptor signaling pathway involved in phagocytosis                   | 2/2279 | 5/18866 | 0.1137383 | 0.4298823 | 0.3889727 | 2 | PTPRJ/PTPRC   |
| Biological Process | GO:1905605 | positive regulation of blood-brain barrier permeability                                               | 2/2279 | 5/18866 | 0.1137383 | 0.4298823 | 0.3889727 | 2 | TJP2/ANGPT1   |
| Biological Process | GO:1905749 | regulation of endosome to plasma membrane protein transport                                           | 2/2279 | 5/18866 | 0.1137383 | 0.4298823 | 0.3889727 | 2 | ZDHC2/AKAP5   |
| Biological Process | GO:1905915 | regulation of cell differentiation involved in phenotypic switching                                   | 2/2279 | 5/18866 | 0.1137383 | 0.4298823 | 0.3889727 | 2 | MIR140/DNMT1  |
| Biological Process | GO:1905930 | regulation of vascular associated smooth muscle cell differentiation involved in phenotypic switching | 2/2279 | 5/18866 | 0.1137383 | 0.4298823 | 0.3889727 | 2 | MIR140/DNMT1  |
| Biological Process | GO:1905962 | glutamatergic neuron differentiation                                                                  | 2/2279 | 5/18866 | 0.1137383 | 0.4298823 | 0.3889727 | 2 | ZHX2/CABP4    |
| Biological Process | GO:2000172 | regulation of branching morphogenesis of a nerve                                                      | 2/2279 | 5/18866 | 0.1137383 | 0.4298823 | 0.3889727 | 2 | BCL11A/RTN4   |

|                    |            |                                                                      |         |          |           |           |           |    |                                                                               |
|--------------------|------------|----------------------------------------------------------------------|---------|----------|-----------|-----------|-----------|----|-------------------------------------------------------------------------------|
| Biological Process | GO:2000554 | regulation of T-helper 1 cell cytokine production                    | 2/2279  | 5/18866  | 0.1137383 | 0.4298823 | 0.3889727 | 2  | IL1R1/IL18R1                                                                  |
| Biological Process | GO:2000556 | positive regulation of T-helper 1 cell cytokine production           | 2/2279  | 5/18866  | 0.1137383 | 0.4298823 | 0.3889727 | 2  | IL1R1/IL18R1                                                                  |
| Biological Process | GO:2000563 | positive regulation of CD4-positive, alpha-beta T cell proliferation | 2/2279  | 5/18866  | 0.1137383 | 0.4298823 | 0.3889727 | 2  | CD55/TGFBR2                                                                   |
| Biological Process | GO:0008344 | adult locomotory behavior                                            | 13/2279 | 75/18866 | 0.1139642 | 0.4298823 | 0.3889727 | 13 | LGI4/HIPK2/APP/SCN1A/WDR47/ARRB2/NPC1/TMOD1/NTAN1/INPP5F/SPTBN4/NTF4/PRKN     |
| Biological Process | GO:0032602 | chemokine production                                                 | 13/2279 | 75/18866 | 0.1139642 | 0.4298823 | 0.3889727 | 13 | AZU1/S100A8/ZFPM1/FOXP1/IL10/C1QTNF3/MEFV/TNF/TLR9/MBP/DEFB124/IL6R/ACKR1     |
| Biological Process | GO:0038034 | signal transduction in absence of ligand                             | 13/2279 | 75/18866 | 0.1139642 | 0.4298823 | 0.3889727 | 13 | LCN2/TNF/UNC5B/RIPK1/FGFR1/NF1/PPP2R1A/BCL2/PPP2R1B/BCL2L1/INHBA/FADD/DAPK3   |
| Biological Process | GO:0043627 | response to estrogen                                                 | 13/2279 | 75/18866 | 0.1139642 | 0.4298823 | 0.3889727 | 13 | PPARG/ASH2L/ABCC2/TGFBR2/COMT/ZNF366/CRHBP/KMT2D/RARA/GHRL/ARSB/PDGFRB/NCOA4  |
| Biological Process | GO:0097192 | extrinsic apoptotic signaling pathway in absence of ligand           | 13/2279 | 75/18866 | 0.1139642 | 0.4298823 | 0.3889727 | 13 | LCN2/TNF/UNC5B/RIPK1/FGFR1/NF1/PPP2R1A/BCL2/PPP2R1B/BCL2L1/INHBA/FADD/DAPK3   |
| Biological Process | GO:1900006 | positive regulation of dendrite development                          | 13/2279 | 75/18866 | 0.1139642 | 0.4298823 | 0.3889727 | 13 | ZMYND8/ITSN1/CUX1/BAIAP2/ILK/SS18L2/CPEB3/CDKL3/DNM1L/SHANK2/CYFIP1/CUX2/DBNL |

|                    |            |                                             |         |           |           |           |           |    |                                                                                                                                                                                                                                                                                                                                                |
|--------------------|------------|---------------------------------------------|---------|-----------|-----------|-----------|-----------|----|------------------------------------------------------------------------------------------------------------------------------------------------------------------------------------------------------------------------------------------------------------------------------------------------------------------------------------------------|
| Biological Process | GO:0030193 | regulation of blood coagulation             | 14/2279 | 82/18866  | 0.1139879 | 0.4298823 | 0.3889727 | 14 | PLAU/CD9/PRKCA/UBASH3B/SERPINB2/THBS1/F12/BLK/PDGFB/NFE2L2/CPB2/F2R/ANO6/ADTRP                                                                                                                                                                                                                                                                 |
| Biological Process | GO:0045652 | regulation of megakaryocyte differentiation | 14/2279 | 82/18866  | 0.1139879 | 0.4298823 | 0.3889727 | 14 | ZFPM1/RUNX1/ASH2L/TNRC6B/AGO1/TESC/THBS1/ITGA2B/HDAC1/MTURN/KMT2D/SETD1A/MEF2C/H3C1                                                                                                                                                                                                                                                            |
| Biological Process | GO:0006734 | NADH metabolic process                      | 8/2279  | 41/18866  | 0.1144406 | 0.4298823 | 0.3889727 | 8  | FOXK1/ENO1/HK1/ADPGK/PGAM1/ENO3/HK2/PKM                                                                                                                                                                                                                                                                                                        |
| Biological Process | GO:0035337 | fatty-acyl-CoA metabolic process            | 8/2279  | 41/18866  | 0.1144406 | 0.4298823 | 0.3889727 | 8  | ACSL1/FAR2/ACOT7/ACACA/ACSF3/ACAT1/SCD/SLC25A1                                                                                                                                                                                                                                                                                                 |
| Biological Process | GO:0038083 | peptidyl-tyrosine autophosphorylation       | 8/2279  | 41/18866  | 0.1144406 | 0.4298823 | 0.3889727 | 8  | AATK/LCK/FGR/SLA/IGF1R/FER/BLK/NTRK1                                                                                                                                                                                                                                                                                                           |
| Biological Process | GO:0051180 | vitamin transport                           | 8/2279  | 41/18866  | 0.1144406 | 0.4298823 | 0.3889727 | 8  | ABCC1/SLC2A14/FOLR3/SLC19A1/CD320/SLC52A2/SLC2A1/SLC23A1                                                                                                                                                                                                                                                                                       |
| Biological Process | GO:0050852 | T cell receptor signaling pathway           | 31/2279 | 206/18866 | 0.1156041 | 0.4298823 | 0.3889727 | 31 | PDE4D/LAT/PIK3CD/LCK/INPP5D/PIK3R1/GRAP2/EIF2B5/DUSP22/CD226/PTPN6/TNFRSF21/PTPRJ/LILRB4/PTPRC/CSK/BCL10/PSMF1/THEMIS2/PSMB7/DUSP3/PRAM1/ELF1/CYLD/PLCG1/RELA/FBXW11/EZR/PSMD13/FYB1/SLA2                                                                                                                                                      |
| Biological Process | GO:2000146 | negative regulation of cell motility        | 52/2279 | 365/18866 | 0.1162285 | 0.4298823 | 0.3889727 | 52 | TACSTD2/ABR/CALR/PPARG/MIR140/KANK1/ARHGDI1/ZMYND8/ITGB1BP1/SPINT2/LDLRAD4/MIR199A1/TNF/MIR101-2/DUSP22/PADI2/JUP/NAV3/THBS1/C5AR2/MIR24-2/ILK/SMAD7/MIA3/WNT11/WASL/NISCH/TGFB1/PTPRJ/NF1/STK24/SRGAP1/BCR/PLCB1/NFE2L2/ENG/VASH1/MIR138-2/CDH1/BCL2/MIR199A2/NOTCH1/CORO1C/MEF2C/DUSP3/SP100/TRIB1/ADTRP/CERS2/PTPRU/NODAL/CX3CR1            |
| Biological Process | GO:0150063 | visual system development                   | 55/2279 | 388/18866 | 0.1162914 | 0.4298823 | 0.3889727 | 55 | SPRED2/RXRA/PDE6A/FZR1/SLC25A25/LIMK2/MFSD2A/LPCAT1/CACNA1C/LRPSL/SKI/CRB1/SMAD3/ZEB2/SH3PXD2B/HIPK2/TGFBR2/MYH15/NINJ1/DLL1/HDAC1/GNAT2/PAX2/FLT1/RDH10/RARA/NF1/CRYBB1/SP3/RARG/BMPR1B/WNT5B/GRHL2/IFT140/MEIS2/PRKCI/MYOM1/MEIS1/BCL2/RPGRIP1/ZHX2/PBX4/COL5A1/SDK2/BCAR3/NRL/PDGFRB/ARHGGEF15/TMOD1/ALDH1A2/INHBA/CABP4/TSKU/NPHP4/NECTIN1 |

|                    |            |                                                                    |         |           |           |           |           |    |                                                                                                                                                                                                                                                           |
|--------------------|------------|--------------------------------------------------------------------|---------|-----------|-----------|-----------|-----------|----|-----------------------------------------------------------------------------------------------------------------------------------------------------------------------------------------------------------------------------------------------------------|
| Biological Process | GO:0038061 | NIK/NF-kappaB signaling                                            | 28/2279 | 184/18866 | 0.1172526 | 0.4298823 | 0.3889727 | 28 | CALR/C1QTNF3/CHI3L1/HDAC7/NLRP3/TNF/TRAF2/AGO1/TLR9/APP/ACTN4/MIR27A/ILK/CPNE1/PHB/LITAF/RIPK3/PSMF1/MAP3K14/NOD2/PSMB7/IL18R1/CYLD/RELA/FBXW11/BCL3/PSMD13/ADGRG3                                                                                        |
| Biological Process | GO:0045927 | positive regulation of growth                                      | 40/2279 | 274/18866 | 0.1175905 | 0.4298823 | 0.3889727 | 40 | S100A8/RPTOR/CPNE6/RPS6KA1/CREB1/MFSD2A/EXOSC2/MIR199A1/CPNE5/SH3PXD2B/KRT17/TGFBR2/DISC1/SLC44A4/DLL1/RBPJ/DERL2/ILK/SMAD7/FGFR1/SEMA4D/SMURF1/GHRL/ACACB/CDH4/PLCB1/BCL2/MIR199A2/NOTCH1/MEF2C/SYT17/HLX/CYFIP1/TRPV2/NDEL1/EZR/SPTBN4/EIF4G1/DBNL/PRKN |
| Biological Process | GO:0002089 | lens morphogenesis in camera-type eye                              | 5/2279  | 22/18866  | 0.1176382 | 0.4298823 | 0.3889727 | 5  | SKI/HIPK2/MEIS1/BCAR3/NECTIN1                                                                                                                                                                                                                             |
| Biological Process | GO:0006925 | inflammatory cell apoptotic process                                | 5/2279  | 22/18866  | 0.1176382 | 0.4298823 | 0.3889727 | 5  | PIK3CD/ITPKB/CCL5/NOD2/MEF2C                                                                                                                                                                                                                              |
| Biological Process | GO:0007063 | regulation of sister chromatid cohesion                            | 5/2279  | 22/18866  | 0.1176382 | 0.4298823 | 0.3889727 | 5  | TNKS/NSMCE2/RB1/CDCAS/SLF1                                                                                                                                                                                                                                |
| Biological Process | GO:0009083 | branched-chain amino acid catabolic process                        | 5/2279  | 22/18866  | 0.1176382 | 0.4298823 | 0.3889727 | 5  | ACAD8/HIBADH/BCKDHA/HMGCL/ACAT1                                                                                                                                                                                                                           |
| Biological Process | GO:0032928 | regulation of superoxide anion generation                          | 5/2279  | 22/18866  | 0.1176382 | 0.4298823 | 0.3889727 | 5  | CD177/FPR2/GNAI2/TGFB1/ITGB2                                                                                                                                                                                                                              |
| Biological Process | GO:0043369 | CD4-positive or CD8-positive, alpha-beta T cell lineage commitment | 5/2279  | 22/18866  | 0.1176382 | 0.4298823 | 0.3889727 | 5  | ZFPM1/LOXL3/LY9/BCL2/CYLD                                                                                                                                                                                                                                 |
| Biological Process | GO:0045624 | positive regulation of T-helper cell differentiation               | 5/2279  | 22/18866  | 0.1176382 | 0.4298823 | 0.3889727 | 5  | PRKCZ/MYB/NLRP3/RARA/HLX                                                                                                                                                                                                                                  |

|                    |            |                                                             |         |           |           |           |           |    |                                                                                                                                              |
|--------------------|------------|-------------------------------------------------------------|---------|-----------|-----------|-----------|-----------|----|----------------------------------------------------------------------------------------------------------------------------------------------|
| Biological Process | GO:0072576 | liver morphogenesis                                         | 5/2279  | 22/18866  | 0.1176382 | 0.4298823 | 0.3889727 | 5  | RPS6KA1/TNFAIP3/CUL3/CPB2/CEBPB                                                                                                              |
| Biological Process | GO:2000114 | regulation of establishment of cell polarity                | 5/2279  | 22/18866  | 0.1176382 | 0.4298823 | 0.3889727 | 5  | GSN/KANK1/RAP1B/DOCK8/CYRIB                                                                                                                  |
| Biological Process | GO:1902652 | secondary alcohol metabolic process                         | 25/2279 | 162/18866 | 0.1182505 | 0.4298823 | 0.3889727 | 25 | OSBPL5/RXRA/IDI1/LIPC/MBTPS1/ABCG1/HDLBP/AKR1D1/APP/FGFR1/FDX1/DGKQ/POR/ABCA1/GNB3/ACACB/CAT/NPC1/ACACA/LMF1/HMGCS1/SCD/SREBF1/ACADVL/PRKAA1 |
| Biological Process | GO:0001780 | neutrophil homeostasis                                      | 4/2279  | 16/18866  | 0.1183056 | 0.4298823 | 0.3889727 | 4  | PIK3CD/ITPKB/CCR2/JAM3                                                                                                                       |
| Biological Process | GO:0001977 | renal system process involved in regulation of blood volume | 4/2279  | 16/18866  | 0.1183056 | 0.4298823 | 0.3889727 | 4  | GJA5/PDGFB/F2R/HSD11B2                                                                                                                       |
| Biological Process | GO:0002830 | positive regulation of type 2 immune response               | 4/2279  | 16/18866  | 0.1183056 | 0.4298823 | 0.3889727 | 4  | PRKCZ/NLRP3/RARA/NOD2                                                                                                                        |
| Biological Process | GO:0003222 | ventricular trabecula myocardium morphogenesis              | 4/2279  | 16/18866  | 0.1183056 | 0.4298823 | 0.3889727 | 4  | CCM2L/RBPJ/ENG/NOTCH1                                                                                                                        |
| Biological Process | GO:0006047 | UDP-N-acetylglucosamine metabolic process                   | 4/2279  | 16/18866  | 0.1183056 | 0.4298823 | 0.3889727 | 4  | NAGK/AMDHD2/GFPT2/DPAGT1                                                                                                                     |
| Biological Process | GO:0006555 | methionine metabolic process                                | 4/2279  | 16/18866  | 0.1183056 | 0.4298823 | 0.3889727 | 4  | MSRA/MTHFD1/MAT1A/ADI1                                                                                                                       |

|                    |            |                                               |        |          |           |           |           |   |                           |
|--------------------|------------|-----------------------------------------------|--------|----------|-----------|-----------|-----------|---|---------------------------|
| Biological Process | GO:0009263 | deoxyribonucleotide biosynthetic process      | 4/2279 | 16/18866 | 0.1183056 | 0.4298823 | 0.3889727 | 4 | RRM2B/GUK1/AK5/DCTD       |
| Biological Process | GO:0019511 | peptidyl-proline hydroxylation                | 4/2279 | 16/18866 | 0.1183056 | 0.4298823 | 0.3889727 | 4 | P4HB/P4HA2/P3H3/P3H1      |
| Biological Process | GO:0032354 | response to follicle-stimulating hormone      | 4/2279 | 16/18866 | 0.1183056 | 0.4298823 | 0.3889727 | 4 | POR/NOTCH1/HMGCS1/INHBA   |
| Biological Process | GO:0034374 | low-density lipoprotein particle remodeling   | 4/2279 | 16/18866 | 0.1183056 | 0.4298823 | 0.3889727 | 4 | MPO/LIPC/ABCG1/AGTR1      |
| Biological Process | GO:0043174 | nucleoside salvage                            | 4/2279 | 16/18866 | 0.1183056 | 0.4298823 | 0.3889727 | 4 | CDA/TK2/UCK2/TK1          |
| Biological Process | GO:0043249 | erythrocyte maturation                        | 4/2279 | 16/18866 | 0.1183056 | 0.4298823 | 0.3889727 | 4 | MAEA/BRD1/EPB42/ERCC2     |
| Biological Process | GO:0046855 | inositol phosphate dephosphorylation          | 4/2279 | 16/18866 | 0.1183056 | 0.4298823 | 0.3889727 | 4 | SYNJ2/INPP5A/INPP5E/IMPA2 |
| Biological Process | GO:0050774 | negative regulation of dendrite morphogenesis | 4/2279 | 16/18866 | 0.1183056 | 0.4298823 | 0.3889727 | 4 | YWHAH/RAPGEF2/DNM3/UBE3A  |
| Biological Process | GO:0061450 | trophoblast cell migration                    | 4/2279 | 16/18866 | 0.1183056 | 0.4298823 | 0.3889727 | 4 | CALR/ARHGDI3/AGO2/NODAL   |

|                    |            |                                                           |        |          |           |           |           |   |                                                          |
|--------------------|------------|-----------------------------------------------------------|--------|----------|-----------|-----------|-----------|---|----------------------------------------------------------|
| Biological Process | GO:0070886 | positive regulation of calcineurin-NFAT signaling cascade | 4/2279 | 16/18866 | 0.1183056 | 0.4298823 | 0.3889727 | 4 | TNF/CAMTA1/CHERP/STIMATE                                 |
| Biological Process | GO:0071732 | cellular response to nitric oxide                         | 4/2279 | 16/18866 | 0.1183056 | 0.4298823 | 0.3889727 | 4 | DNM2/TRAF2/AQP1/FOXO1                                    |
| Biological Process | GO:0090083 | regulation of inclusion body assembly                     | 4/2279 | 16/18866 | 0.1183056 | 0.4298823 | 0.3889727 | 4 | SORL1/CLU/DNAJB6/BAG5                                    |
| Biological Process | GO:0090136 | epithelial cell-cell adhesion                             | 4/2279 | 16/18866 | 0.1183056 | 0.4298823 | 0.3889727 | 4 | JUP/ITGB5/PLEKHA7/KIFC3                                  |
| Biological Process | GO:0106058 | positive regulation of calcineurin-mediated signaling     | 4/2279 | 16/18866 | 0.1183056 | 0.4298823 | 0.3889727 | 4 | TNF/CAMTA1/CHERP/STIMATE                                 |
| Biological Process | GO:1901163 | regulation of trophoblast cell migration                  | 4/2279 | 16/18866 | 0.1183056 | 0.4298823 | 0.3889727 | 4 | CALR/ARHGDI1/AGO2/NODAL                                  |
| Biological Process | GO:1902969 | mitotic DNA replication                                   | 4/2279 | 16/18866 | 0.1183056 | 0.4298823 | 0.3889727 | 4 | BRCA2/FGFR1/MCM2/CHEK2                                   |
| Biological Process | GO:1903830 | magnesium ion transmembrane transport                     | 4/2279 | 16/18866 | 0.1183056 | 0.4298823 | 0.3889727 | 4 | NIPAL3/ZDHHC17/CNNM2/SLC41A1                             |
| Biological Process | GO:0060324 | face development                                          | 9/2279 | 48/18866 | 0.118468  | 0.4298823 | 0.3889727 | 9 | ARID5B/CRISPLD2/SKI/ANKRD11/RARA/RARG/GRHL2/ASPH/ALDH1A2 |

|                    |            |                                                      |         |           |           |           |           |    |                                                                                                                                                                                                                                                                                                                                                                                                          |
|--------------------|------------|------------------------------------------------------|---------|-----------|-----------|-----------|-----------|----|----------------------------------------------------------------------------------------------------------------------------------------------------------------------------------------------------------------------------------------------------------------------------------------------------------------------------------------------------------------------------------------------------------|
| Biological Process | GO:0070169 | positive regulation of biomineral tissue development | 9/2279  | 48/18866  | 0.118468  | 0.4298823 | 0.3889727 | 9  | SMAD3/SLC8A1/TGFB1/BMPR1B/MEF2C/LTF/CEBPB/ANO6/FAM20C                                                                                                                                                                                                                                                                                                                                                    |
| Biological Process | GO:0110151 | positive regulation of biomineralization             | 9/2279  | 48/18866  | 0.118468  | 0.4298823 | 0.3889727 | 9  | SMAD3/SLC8A1/TGFB1/BMPR1B/MEF2C/LTF/CEBPB/ANO6/FAM20C                                                                                                                                                                                                                                                                                                                                                    |
| Biological Process | GO:1900274 | regulation of phospholipase C activity               | 9/2279  | 48/18866  | 0.118468  | 0.4298823 | 0.3889727 | 9  | FLT1/P2RY6/FGFR1/PHB/LPAR2/S1PR4/PDGFRB/PLCG1/NTF4                                                                                                                                                                                                                                                                                                                                                       |
| Biological Process | GO:0052547 | regulation of peptidase activity                     | 65/2279 | 466/18866 | 0.119914  | 0.4298823 | 0.3889727 | 65 | SLPI/NLRC4/S100A8/CSTA/TIMP2/SORL1/SERPINA1/GRAMD4/SPOCK2/AIM2/PPARG/GSN/RPS6KA1/APLP2/LCK/SERPINB11/NLRP3/SMAD3/ARRB1/SPINT2/MIR199A1/MEFV/TNF/TRAF2/CYFIP2/MICAL1/TBC1D10A/SERPINB2/CTSD/BIN1/THBS1/CTSH/RIPK1/APP/UBE2O/MBP/MIR24-2/HDAC1/PAX2/CIDEA/AQP1/PERP/POR/DNAJB6/BCL10/ATP2A3/PSMF1/GRN/CRIM1/NOL3/ARRB2/FIS1/MIR199A2/PIH1D1/P2RX1/F2R/LTF/CASP1/BCL2L13/COL28A1/ASPH/NODAL/FADD/PCID2/VSIR |
| Biological Process | GO:0046883 | regulation of hormone secretion                      | 39/2279 | 267/18866 | 0.1202267 | 0.4298823 | 0.3889727 | 39 | NADK/C1QTNF3/ITPR2/MYRIP/CREB1/MYB/CACNA1C/LRP5L/RAB11FIP1/ARRB1/PRKCA/GPLD1/TNF/CCL5/ITSN1/ITPR1/RFX3/TCF7L2/FGFR1/CRHBP/ENY2/GIPR/BLK/GHRL/KLF7/ARNTL/PER2/SLC16A1/PRKCE/AGTR1/SLC2A1/SREBF1/CPT1A/RPH3AL/INHBA/LIF/C2CD2L/SIRT3/PRKN                                                                                                                                                                  |
| Biological Process | GO:0030509 | BMP signaling pathway                                | 24/2279 | 155/18866 | 0.1204825 | 0.4298823 | 0.3889727 | 24 | SORL1/MIR140/SKI/SMAD3/HIPK2/RBPJ/UBE2O/ILK/PCSK6/SMAD7/TGFB1/SMURF1/BMPER/BMPR1B/RUNX2/NUMA1/ENG/NOTCH1/SLC33A1/HTRA3/GDF6/ZNF423/NODAL/SPARTAN                                                                                                                                                                                                                                                         |
| Biological Process | GO:0048608 | reproductive structure development                   | 62/2279 | 443/18866 | 0.1205529 | 0.4298823 | 0.3889727 | 62 | ARID5B/BSG/RXRA/IL10/PPARG/BRC2/VDR/SETD2/ARRB1/SPINT2/EIF2B5/E2F7/CSDE1/HSD17B2/RBPJ/PTPN6/FANCA/RDH10/RARA/SF1/SP3/DNAJB6/DAZAP1/GHRL/RARG/BMPR1B/STK3/GRHL2/ASB1/NCOA1/PDGFB/CTSB/ARRB2/GJB3/VASH1/NTRK1/HOXA9/RAD21L1/BCL2/DMC1/NOTCH1/TPPP3/EPAS1/SLIT3/GGNBP2/STOX2/UBE3A/TMED2/CEBPB/PCDH12/PDGFRB/ERCC1/CRIP1/BCL2L1/HMGCS1/TYRO3/NCOA4/PLCD3/INHBA/NODAL/LIF/ETNK2                              |
| Biological Process | GO:0000409 | regulation of transcription by galactose             | 1/2279  | 1/18866   | 0.1207993 | 0.4298823 | 0.3889727 | 1  | NCOA1                                                                                                                                                                                                                                                                                                                                                                                                    |
| Biological Process | GO:0000411 | positive regulation of transcription by galactose    | 1/2279  | 1/18866   | 0.1207993 | 0.4298823 | 0.3889727 | 1  | NCOA1                                                                                                                                                                                                                                                                                                                                                                                                    |



|                    |            |                                                                                   |        |         |           |           |           |   |       |
|--------------------|------------|-----------------------------------------------------------------------------------|--------|---------|-----------|-----------|-----------|---|-------|
| Biological Process | GO:0000431 | regulation of transcription from RNA polymerase II promoter by galactose          | 1/2279 | 1/18866 | 0.1207993 | 0.4298823 | 0.3889727 | 1 | NCOA1 |
| Biological Process | GO:0000435 | positive regulation of transcription from RNA polymerase II promoter by galactose | 1/2279 | 1/18866 | 0.1207993 | 0.4298823 | 0.3889727 | 1 | NCOA1 |
| Biological Process | GO:0000732 | strand displacement                                                               | 1/2279 | 1/18866 | 0.1207993 | 0.4298823 | 0.3889727 | 1 | RTEL1 |
| Biological Process | GO:0001695 | histamine catabolic process                                                       | 1/2279 | 1/18866 | 0.1207993 | 0.4298823 | 0.3889727 | 1 | HNMT  |
| Biological Process | GO:0001770 | establishment of natural killer cell polarity                                     | 1/2279 | 1/18866 | 0.1207993 | 0.4298823 | 0.3889727 | 1 | SNX27 |
| Biological Process | GO:0001949 | sebaceous gland cell differentiation                                              | 1/2279 | 1/18866 | 0.1207993 | 0.4298823 | 0.3889727 | 1 | FA2H  |
| Biological Process | GO:0001971 | negative regulation of activation of membrane attack complex                      | 1/2279 | 1/18866 | 0.1207993 | 0.4298823 | 0.3889727 | 1 | CD59  |
| Biological Process | GO:0002148 | hypochlorous acid metabolic process                                               | 1/2279 | 1/18866 | 0.1207993 | 0.4298823 | 0.3889727 | 1 | MPO   |
| Biological Process | GO:0002149 | hypochlorous acid biosynthetic process                                            | 1/2279 | 1/18866 | 0.1207993 | 0.4298823 | 0.3889727 | 1 | MPO   |

|                    |            |                                                                                      |        |         |           |           |           |   |        |
|--------------------|------------|--------------------------------------------------------------------------------------|--------|---------|-----------|-----------|-----------|---|--------|
| Biological Process | GO:0002174 | mammary stem cell proliferation                                                      | 1/2279 | 1/18866 | 0.1207993 | 0.4298823 | 0.3889727 | 1 | LBH    |
| Biological Process | GO:0002380 | immunoglobulin secretion involved in immune response                                 | 1/2279 | 1/18866 | 0.1207993 | 0.4298823 | 0.3889727 | 1 | POU2F2 |
| Biological Process | GO:0002560 | basophil mediated immunity                                                           | 1/2279 | 1/18866 | 0.1207993 | 0.4298823 | 0.3889727 | 1 | PI4K2A |
| Biological Process | GO:0002561 | basophil degranulation                                                               | 1/2279 | 1/18866 | 0.1207993 | 0.4298823 | 0.3889727 | 1 | PI4K2A |
| Biological Process | GO:0002649 | regulation of tolerance induction to self antigen                                    | 1/2279 | 1/18866 | 0.1207993 | 0.4298823 | 0.3889727 | 1 | TGFBR2 |
| Biological Process | GO:0002651 | positive regulation of tolerance induction to self antigen                           | 1/2279 | 1/18866 | 0.1207993 | 0.4298823 | 0.3889727 | 1 | TGFBR2 |
| Biological Process | GO:0002777 | antimicrobial peptide biosynthetic process                                           | 1/2279 | 1/18866 | 0.1207993 | 0.4298823 | 0.3889727 | 1 | ELANE  |
| Biological Process | GO:0002780 | antibacterial peptide biosynthetic process                                           | 1/2279 | 1/18866 | 0.1207993 | 0.4298823 | 0.3889727 | 1 | ELANE  |
| Biological Process | GO:0002812 | biosynthetic process of antibacterial peptides active against Gram-negative bacteria | 1/2279 | 1/18866 | 0.1207993 | 0.4298823 | 0.3889727 | 1 | ELANE  |

|                    |            |                                                                                                   |        |         |           |           |           |   |        |
|--------------------|------------|---------------------------------------------------------------------------------------------------|--------|---------|-----------|-----------|-----------|---|--------|
| Biological Process | GO:0002875 | negative regulation of chronic inflammatory response to antigenic stimulus                        | 1/2279 | 1/18866 | 0.1207993 | 0.4298823 | 0.3889727 | 1 | IL10   |
| Biological Process | GO:0003108 | negative regulation of the force of heart contraction by chemical signal                          | 1/2279 | 1/18866 | 0.1207993 | 0.4298823 | 0.3889727 | 1 | GRK2   |
| Biological Process | GO:0003172 | sinoatrial valve development                                                                      | 1/2279 | 1/18866 | 0.1207993 | 0.4298823 | 0.3889727 | 1 | MEF2C  |
| Biological Process | GO:0003178 | coronary sinus valve development                                                                  | 1/2279 | 1/18866 | 0.1207993 | 0.4298823 | 0.3889727 | 1 | NOTCH1 |
| Biological Process | GO:0003182 | coronary sinus valve morphogenesis                                                                | 1/2279 | 1/18866 | 0.1207993 | 0.4298823 | 0.3889727 | 1 | NOTCH1 |
| Biological Process | GO:0003185 | sinoatrial valve morphogenesis                                                                    | 1/2279 | 1/18866 | 0.1207993 | 0.4298823 | 0.3889727 | 1 | MEF2C  |
| Biological Process | GO:0003270 | Notch signaling pathway involved in regulation of secondary heart field cardioblast proliferation | 1/2279 | 1/18866 | 0.1207993 | 0.4298823 | 0.3889727 | 1 | NOTCH1 |
| Biological Process | GO:0003294 | atrial ventricular junction remodeling                                                            | 1/2279 | 1/18866 | 0.1207993 | 0.4298823 | 0.3889727 | 1 | GJA5   |
| Biological Process | GO:0005982 | starch metabolic process                                                                          | 1/2279 | 1/18866 | 0.1207993 | 0.4298823 | 0.3889727 | 1 | MGAM   |

|                    |            |                                              |        |         |           |           |           |   |       |
|--------------------|------------|----------------------------------------------|--------|---------|-----------|-----------|-----------|---|-------|
| Biological Process | GO:0005983 | starch catabolic process                     | 1/2279 | 1/18866 | 0.1207993 | 0.4298823 | 0.3889727 | 1 | MGAM  |
| Biological Process | GO:0006117 | acetaldehyde metabolic process               | 1/2279 | 1/18866 | 0.1207993 | 0.4298823 | 0.3889727 | 1 | RELA  |
| Biological Process | GO:0006148 | inosine catabolic process                    | 1/2279 | 1/18866 | 0.1207993 | 0.4298823 | 0.3889727 | 1 | PNP   |
| Biological Process | GO:0006173 | dADP biosynthetic process                    | 1/2279 | 1/18866 | 0.1207993 | 0.4298823 | 0.3889727 | 1 | AK5   |
| Biological Process | GO:0006185 | dGDP biosynthetic process                    | 1/2279 | 1/18866 | 0.1207993 | 0.4298823 | 0.3889727 | 1 | GUK1  |
| Biological Process | GO:0006452 | translational frameshifting                  | 1/2279 | 1/18866 | 0.1207993 | 0.4298823 | 0.3889727 | 1 | SHFL  |
| Biological Process | GO:0006507 | GPI anchor release                           | 1/2279 | 1/18866 | 0.1207993 | 0.4298823 | 0.3889727 | 1 | GPLD1 |
| Biological Process | GO:0006669 | sphinganine-1-phosphate biosynthetic process | 1/2279 | 1/18866 | 0.1207993 | 0.4298823 | 0.3889727 | 1 | SPHK2 |
| Biological Process | GO:0006713 | glucocorticoid catabolic process             | 1/2279 | 1/18866 | 0.1207993 | 0.4298823 | 0.3889727 | 1 | YWHAH |

|                    |            |                                               |        |         |           |           |           |   |         |
|--------------------|------------|-----------------------------------------------|--------|---------|-----------|-----------|-----------|---|---------|
| Biological Process | GO:0006738 | nicotinamide riboside catabolic process       | 1/2279 | 1/18866 | 0.1207993 | 0.4298823 | 0.3889727 | 1 | PNP     |
| Biological Process | GO:0006843 | mitochondrial citrate transmembrane transport | 1/2279 | 1/18866 | 0.1207993 | 0.4298823 | 0.3889727 | 1 | SLC25A1 |
| Biological Process | GO:0008039 | synaptic target recognition                   | 1/2279 | 1/18866 | 0.1207993 | 0.4298823 | 0.3889727 | 1 | YWHAZ   |
| Biological Process | GO:0008049 | male courtship behavior                       | 1/2279 | 1/18866 | 0.1207993 | 0.4298823 | 0.3889727 | 1 | HEXB    |
| Biological Process | GO:0008052 | sensory organ boundary specification          | 1/2279 | 1/18866 | 0.1207993 | 0.4298823 | 0.3889727 | 1 | NTF4    |
| Biological Process | GO:0008653 | lipopolysaccharide metabolic process          | 1/2279 | 1/18866 | 0.1207993 | 0.4298823 | 0.3889727 | 1 | AOAH    |
| Biological Process | GO:0009087 | methionine catabolic process                  | 1/2279 | 1/18866 | 0.1207993 | 0.4298823 | 0.3889727 | 1 | MAT1A   |
| Biological Process | GO:0009104 | lipopolysaccharide catabolic process          | 1/2279 | 1/18866 | 0.1207993 | 0.4298823 | 0.3889727 | 1 | AOAH    |
| Biological Process | GO:0009443 | pyridoxal 5'-phosphate salvage                | 1/2279 | 1/18866 | 0.1207993 | 0.4298823 | 0.3889727 | 1 | PDXK    |

|                    |            |                                                                                                           |        |         |           |           |           |   |        |
|--------------------|------------|-----------------------------------------------------------------------------------------------------------|--------|---------|-----------|-----------|-----------|---|--------|
| Biological Process | GO:0009645 | response to low light intensity stimulus                                                                  | 1/2279 | 1/18866 | 0.1207993 | 0.4298823 | 0.3889727 | 1 | HMGCS1 |
| Biological Process | GO:0010085 | polarity specification of proximal/distal axis                                                            | 1/2279 | 1/18866 | 0.1207993 | 0.4298823 | 0.3889727 | 1 | NODAL  |
| Biological Process | GO:0010160 | formation of animal organ boundary                                                                        | 1/2279 | 1/18866 | 0.1207993 | 0.4298823 | 0.3889727 | 1 | NTF4   |
| Biological Process | GO:0010189 | vitamin E biosynthetic process                                                                            | 1/2279 | 1/18866 | 0.1207993 | 0.4298823 | 0.3889727 | 1 | PLTP   |
| Biological Process | GO:0010585 | glutamine secretion                                                                                       | 1/2279 | 1/18866 | 0.1207993 | 0.4298823 | 0.3889727 | 1 | SLC1A5 |
| Biological Process | GO:0010768 | negative regulation of transcription from RNA polymerase II promoter in response to UV-induced DNA damage | 1/2279 | 1/18866 | 0.1207993 | 0.4298823 | 0.3889727 | 1 | NEDD4  |
| Biological Process | GO:0014006 | regulation of microglia differentiation                                                                   | 1/2279 | 1/18866 | 0.1207993 | 0.4298823 | 0.3889727 | 1 | TGFB1  |
| Biological Process | GO:0014008 | positive regulation of microglia differentiation                                                          | 1/2279 | 1/18866 | 0.1207993 | 0.4298823 | 0.3889727 | 1 | TGFB1  |
| Biological Process | GO:0014810 | positive regulation of skeletal muscle contraction by regulation of release of sequestered calcium ion    | 1/2279 | 1/18866 | 0.1207993 | 0.4298823 | 0.3889727 | 1 | GSTO1  |

|                    |            |                                           |        |         |           |           |           |   |         |
|--------------------|------------|-------------------------------------------|--------|---------|-----------|-----------|-----------|---|---------|
| Biological Process | GO:0014813 | skeletal muscle satellite cell commitment | 1/2279 | 1/18866 | 0.1207993 | 0.4298823 | 0.3889727 | 1 | PAX7    |
| Biological Process | GO:0015675 | nickel cation transport                   | 1/2279 | 1/18866 | 0.1207993 | 0.4298823 | 0.3889727 | 1 | SLC11A2 |
| Biological Process | GO:0015692 | lead ion transport                        | 1/2279 | 1/18866 | 0.1207993 | 0.4298823 | 0.3889727 | 1 | SLC11A2 |
| Biological Process | GO:0015694 | mercury ion transport                     | 1/2279 | 1/18866 | 0.1207993 | 0.4298823 | 0.3889727 | 1 | ABCC2   |
| Biological Process | GO:0015707 | nitrite transport                         | 1/2279 | 1/18866 | 0.1207993 | 0.4298823 | 0.3889727 | 1 | SLC11A1 |
| Biological Process | GO:0015723 | bilirubin transport                       | 1/2279 | 1/18866 | 0.1207993 | 0.4298823 | 0.3889727 | 1 | ABCC2   |
| Biological Process | GO:0015728 | mevalonate transport                      | 1/2279 | 1/18866 | 0.1207993 | 0.4298823 | 0.3889727 | 1 | SLC16A1 |
| Biological Process | GO:0015829 | valine transport                          | 1/2279 | 1/18866 | 0.1207993 | 0.4298823 | 0.3889727 | 1 | SLC7A8  |
| Biological Process | GO:0015876 | acetyl-CoA transport                      | 1/2279 | 1/18866 | 0.1207993 | 0.4298823 | 0.3889727 | 1 | SLC33A1 |

|                    |            |                                                                   |        |         |           |           |           |   |        |
|--------------------|------------|-------------------------------------------------------------------|--------|---------|-----------|-----------|-----------|---|--------|
| Biological Process | GO:0015904 | tetracycline transmembrane transport                              | 1/2279 | 1/18866 | 0.1207993 | 0.4298823 | 0.3889727 | 1 | MFSD10 |
| Biological Process | GO:0016333 | morphogenesis of follicular epithelium                            | 1/2279 | 1/18866 | 0.1207993 | 0.4298823 | 0.3889727 | 1 | WDR1   |
| Biological Process | GO:0016334 | establishment or maintenance of polarity of follicular epithelium | 1/2279 | 1/18866 | 0.1207993 | 0.4298823 | 0.3889727 | 1 | WDR1   |
| Biological Process | GO:0018011 | N-terminal peptidyl-alanine methylation                           | 1/2279 | 1/18866 | 0.1207993 | 0.4298823 | 0.3889727 | 1 | NTMT1  |
| Biological Process | GO:0018012 | N-terminal peptidyl-alanine trimethylation                        | 1/2279 | 1/18866 | 0.1207993 | 0.4298823 | 0.3889727 | 1 | NTMT1  |
| Biological Process | GO:0018013 | N-terminal peptidyl-glycine methylation                           | 1/2279 | 1/18866 | 0.1207993 | 0.4298823 | 0.3889727 | 1 | NTMT1  |
| Biological Process | GO:0018016 | N-terminal peptidyl-proline dimethylation                         | 1/2279 | 1/18866 | 0.1207993 | 0.4298823 | 0.3889727 | 1 | NTMT1  |
| Biological Process | GO:0018194 | peptidyl-alanine modification                                     | 1/2279 | 1/18866 | 0.1207993 | 0.4298823 | 0.3889727 | 1 | NTMT1  |
| Biological Process | GO:0018969 | thiocyanate metabolic process                                     | 1/2279 | 1/18866 | 0.1207993 | 0.4298823 | 0.3889727 | 1 | LPO    |



|                    |            |                                                      |        |         |           |           |           |   |        |
|--------------------|------------|------------------------------------------------------|--------|---------|-----------|-----------|-----------|---|--------|
| Biological Process | GO:0021501 | prechordal plate formation                           | 1/2279 | 1/18866 | 0.1207993 | 0.4298823 | 0.3889727 | 1 | SSBP3  |
| Biological Process | GO:0021547 | midbrain-hindbrain boundary initiation               | 1/2279 | 1/18866 | 0.1207993 | 0.4298823 | 0.3889727 | 1 | SSBP3  |
| Biological Process | GO:0021634 | optic nerve formation                                | 1/2279 | 1/18866 | 0.1207993 | 0.4298823 | 0.3889727 | 1 | PAX2   |
| Biological Process | GO:0021639 | trochlear nerve morphogenesis                        | 1/2279 | 1/18866 | 0.1207993 | 0.4298823 | 0.3889727 | 1 | PHOX2A |
| Biological Process | GO:0021642 | trochlear nerve formation                            | 1/2279 | 1/18866 | 0.1207993 | 0.4298823 | 0.3889727 | 1 | PHOX2A |
| Biological Process | GO:0021688 | cerebellar molecular layer formation                 | 1/2279 | 1/18866 | 0.1207993 | 0.4298823 | 0.3889727 | 1 | DLL1   |
| Biological Process | GO:0021703 | locus ceruleus development                           | 1/2279 | 1/18866 | 0.1207993 | 0.4298823 | 0.3889727 | 1 | PHOX2A |
| Biological Process | GO:0030034 | microvillar actin bundle assembly                    | 1/2279 | 1/18866 | 0.1207993 | 0.4298823 | 0.3889727 | 1 | ESPN   |
| Biological Process | GO:0030037 | actin filament reorganization involved in cell cycle | 1/2279 | 1/18866 | 0.1207993 | 0.4298823 | 0.3889727 | 1 | ARAP1  |

|                    |            |                                                            |        |         |           |           |           |   |         |
|--------------------|------------|------------------------------------------------------------|--------|---------|-----------|-----------|-----------|---|---------|
| Biological Process | GO:0030393 | fructoselysine metabolic process                           | 1/2279 | 1/18866 | 0.1207993 | 0.4298823 | 0.3889727 | 1 | FN3K    |
| Biological Process | GO:0030653 | beta-lactam antibiotic metabolic process                   | 1/2279 | 1/18866 | 0.1207993 | 0.4298823 | 0.3889727 | 1 | ABCC2   |
| Biological Process | GO:0031038 | myosin II filament organization                            | 1/2279 | 1/18866 | 0.1207993 | 0.4298823 | 0.3889727 | 1 | DAPK3   |
| Biological Process | GO:0031161 | phosphatidylinositol catabolic process                     | 1/2279 | 1/18866 | 0.1207993 | 0.4298823 | 0.3889727 | 1 | INPP5F  |
| Biological Process | GO:0031337 | positive regulation of sulfur amino acid metabolic process | 1/2279 | 1/18866 | 0.1207993 | 0.4298823 | 0.3889727 | 1 | COMT    |
| Biological Process | GO:0032445 | fructose import                                            | 1/2279 | 1/18866 | 0.1207993 | 0.4298823 | 0.3889727 | 1 | SLC2A5  |
| Biological Process | GO:0032458 | slow endocytic recycling                                   | 1/2279 | 1/18866 | 0.1207993 | 0.4298823 | 0.3889727 | 1 | MICAL1  |
| Biological Process | GO:0032461 | positive regulation of protein oligomerization             | 1/2279 | 1/18866 | 0.1207993 | 0.4298823 | 0.3889727 | 1 | ZDHHC1  |
| Biological Process | GO:0032475 | otolith formation                                          | 1/2279 | 1/18866 | 0.1207993 | 0.4298823 | 0.3889727 | 1 | SLC44A4 |

|                    |            |                                                                                    |        |         |           |           |           |   |       |
|--------------------|------------|------------------------------------------------------------------------------------|--------|---------|-----------|-----------|-----------|---|-------|
| Biological Process | GO:0032498 | detection of muramyl dipeptide                                                     | 1/2279 | 1/18866 | 0.1207993 | 0.4298823 | 0.3889727 | 1 | NOD2  |
| Biological Process | GO:0032685 | negative regulation of granulocyte macrophage colony-stimulating factor production | 1/2279 | 1/18866 | 0.1207993 | 0.4298823 | 0.3889727 | 1 | CD84  |
| Biological Process | GO:0032771 | regulation of monophenol monooxygenase activity                                    | 1/2279 | 1/18866 | 0.1207993 | 0.4298823 | 0.3889727 | 1 | CDH3  |
| Biological Process | GO:0032773 | positive regulation of monophenol monooxygenase activity                           | 1/2279 | 1/18866 | 0.1207993 | 0.4298823 | 0.3889727 | 1 | CDH3  |
| Biological Process | GO:0032848 | negative regulation of cellular pH reduction                                       | 1/2279 | 1/18866 | 0.1207993 | 0.4298823 | 0.3889727 | 1 | BCL2  |
| Biological Process | GO:0032887 | regulation of spindle elongation                                                   | 1/2279 | 1/18866 | 0.1207993 | 0.4298823 | 0.3889727 | 1 | NUMA1 |
| Biological Process | GO:0032888 | regulation of mitotic spindle elongation                                           | 1/2279 | 1/18866 | 0.1207993 | 0.4298823 | 0.3889727 | 1 | NUMA1 |
| Biological Process | GO:0032919 | spermine acetylation                                                               | 1/2279 | 1/18866 | 0.1207993 | 0.4298823 | 0.3889727 | 1 | SAT2  |
| Biological Process | GO:0032920 | putrescine acetylation                                                             | 1/2279 | 1/18866 | 0.1207993 | 0.4298823 | 0.3889727 | 1 | SAT2  |

|                    |            |                                                               |        |         |           |           |           |   |         |
|--------------------|------------|---------------------------------------------------------------|--------|---------|-----------|-----------|-----------|---|---------|
| Biological Process | GO:0033214 | siderophore-dependent iron import into cell                   | 1/2279 | 1/18866 | 0.1207993 | 0.4298823 | 0.3889727 | 1 | LTF     |
| Biological Process | GO:0033319 | UDP-D-xylose metabolic process                                | 1/2279 | 1/18866 | 0.1207993 | 0.4298823 | 0.3889727 | 1 | UXS1    |
| Biological Process | GO:0033320 | UDP-D-xylose biosynthetic process                             | 1/2279 | 1/18866 | 0.1207993 | 0.4298823 | 0.3889727 | 1 | UXS1    |
| Biological Process | GO:0033396 | beta-alanine biosynthetic process via 3-ureidopropionate      | 1/2279 | 1/18866 | 0.1207993 | 0.4298823 | 0.3889727 | 1 | UPB1    |
| Biological Process | GO:0033609 | oxalate metabolic process                                     | 1/2279 | 1/18866 | 0.1207993 | 0.4298823 | 0.3889727 | 1 | HOGA1   |
| Biological Process | GO:0034014 | response to triglyceride                                      | 1/2279 | 1/18866 | 0.1207993 | 0.4298823 | 0.3889727 | 1 | GPLD1   |
| Biological Process | GO:0034147 | regulation of toll-like receptor 5 signaling pathway          | 1/2279 | 1/18866 | 0.1207993 | 0.4298823 | 0.3889727 | 1 | TNFAIP3 |
| Biological Process | GO:0034148 | negative regulation of toll-like receptor 5 signaling pathway | 1/2279 | 1/18866 | 0.1207993 | 0.4298823 | 0.3889727 | 1 | TNFAIP3 |
| Biological Process | GO:0034373 | intermediate-density lipoprotein particle remodeling          | 1/2279 | 1/18866 | 0.1207993 | 0.4298823 | 0.3889727 | 1 | LIPC    |

|                    |            |                                           |        |         |           |           |           |   |         |
|--------------------|------------|-------------------------------------------|--------|---------|-----------|-----------|-----------|---|---------|
| Biological Process | GO:0034670 | chemotaxis to arachidonic acid            | 1/2279 | 1/18866 | 0.1207993 | 0.4298823 | 0.3889727 | 1 | CREB1   |
| Biological Process | GO:0035037 | sperm entry                               | 1/2279 | 1/18866 | 0.1207993 | 0.4298823 | 0.3889727 | 1 | UBE3A   |
| Biological Process | GO:0035444 | nickel cation transmembrane transport     | 1/2279 | 1/18866 | 0.1207993 | 0.4298823 | 0.3889727 | 1 | SLC11A2 |
| Biological Process | GO:0035568 | N-terminal peptidyl-proline methylation   | 1/2279 | 1/18866 | 0.1207993 | 0.4298823 | 0.3889727 | 1 | NTMT1   |
| Biological Process | GO:0035570 | N-terminal peptidyl-serine methylation    | 1/2279 | 1/18866 | 0.1207993 | 0.4298823 | 0.3889727 | 1 | NTMT1   |
| Biological Process | GO:0035572 | N-terminal peptidyl-serine dimethylation  | 1/2279 | 1/18866 | 0.1207993 | 0.4298823 | 0.3889727 | 1 | NTMT1   |
| Biological Process | GO:0035573 | N-terminal peptidyl-serine trimethylation | 1/2279 | 1/18866 | 0.1207993 | 0.4298823 | 0.3889727 | 1 | NTMT1   |
| Biological Process | GO:0035611 | protein branching point deglutamylation   | 1/2279 | 1/18866 | 0.1207993 | 0.4298823 | 0.3889727 | 1 | AGBL5   |
| Biological Process | GO:0035623 | renal glucose absorption                  | 1/2279 | 1/18866 | 0.1207993 | 0.4298823 | 0.3889727 | 1 | HNF1A   |

|                    |            |                                                              |        |         |           |           |           |   |        |
|--------------------|------------|--------------------------------------------------------------|--------|---------|-----------|-----------|-----------|---|--------|
| Biological Process | GO:0035704 | helper T cell chemotaxis                                     | 1/2279 | 1/18866 | 0.1207993 | 0.4298823 | 0.3889727 | 1 | CCR2   |
| Biological Process | GO:0035705 | T-helper 17 cell chemotaxis                                  | 1/2279 | 1/18866 | 0.1207993 | 0.4298823 | 0.3889727 | 1 | CCR2   |
| Biological Process | GO:0035724 | CD24 biosynthetic process                                    | 1/2279 | 1/18866 | 0.1207993 | 0.4298823 | 0.3889727 | 1 | PLCB1  |
| Biological Process | GO:0035853 | chromosome passenger complex localization to spindle midzone | 1/2279 | 1/18866 | 0.1207993 | 0.4298823 | 0.3889727 | 1 | KLHL21 |
| Biological Process | GO:0036034 | mediator complex assembly                                    | 1/2279 | 1/18866 | 0.1207993 | 0.4298823 | 0.3889727 | 1 | MED25  |
| Biological Process | GO:0036114 | medium-chain fatty-acyl-CoA catabolic process                | 1/2279 | 1/18866 | 0.1207993 | 0.4298823 | 0.3889727 | 1 | ACOT7  |
| Biological Process | GO:0036116 | long-chain fatty-acyl-CoA catabolic process                  | 1/2279 | 1/18866 | 0.1207993 | 0.4298823 | 0.3889727 | 1 | ACOT7  |
| Biological Process | GO:0036179 | osteoclast maturation                                        | 1/2279 | 1/18866 | 0.1207993 | 0.4298823 | 0.3889727 | 1 | FAM20C |
| Biological Process | GO:0036290 | protein trans-autophosphorylation                            | 1/2279 | 1/18866 | 0.1207993 | 0.4298823 | 0.3889727 | 1 | ERN1   |

|                    |            |                                                                 |        |         |           |           |           |   |       |
|--------------------|------------|-----------------------------------------------------------------|--------|---------|-----------|-----------|-----------|---|-------|
| Biological Process | GO:0036323 | vascular endothelial growth factor receptor-1 signaling pathway | 1/2279 | 1/18866 | 0.1207993 | 0.4298823 | 0.3889727 | 1 | FLT1  |
| Biological Process | GO:0038020 | insulin receptor recycling                                      | 1/2279 | 1/18866 | 0.1207993 | 0.4298823 | 0.3889727 | 1 | SORL1 |
| Biological Process | GO:0038192 | gastric inhibitory peptide signaling pathway                    | 1/2279 | 1/18866 | 0.1207993 | 0.4298823 | 0.3889727 | 1 | GIPR  |
| Biological Process | GO:0042247 | establishment of planar polarity of follicular epithelium       | 1/2279 | 1/18866 | 0.1207993 | 0.4298823 | 0.3889727 | 1 | WDR1  |
| Biological Process | GO:0042316 | penicillin metabolic process                                    | 1/2279 | 1/18866 | 0.1207993 | 0.4298823 | 0.3889727 | 1 | ABCC2 |
| Biological Process | GO:0043310 | negative regulation of eosinophil degranulation                 | 1/2279 | 1/18866 | 0.1207993 | 0.4298823 | 0.3889727 | 1 | CCR2  |
| Biological Process | GO:0043322 | negative regulation of natural killer cell degranulation        | 1/2279 | 1/18866 | 0.1207993 | 0.4298823 | 0.3889727 | 1 | HLA-F |
| Biological Process | GO:0043519 | regulation of myosin II filament organization                   | 1/2279 | 1/18866 | 0.1207993 | 0.4298823 | 0.3889727 | 1 | DAPK3 |
| Biological Process | GO:0043602 | nitrate catabolic process                                       | 1/2279 | 1/18866 | 0.1207993 | 0.4298823 | 0.3889727 | 1 | POR   |

|                    |            |                                                                                               |        |         |           |           |           |   |       |
|--------------------|------------|-----------------------------------------------------------------------------------------------|--------|---------|-----------|-----------|-----------|---|-------|
| Biological Process | GO:0043977 | histone H2A-K5 acetylation                                                                    | 1/2279 | 1/18866 | 0.1207993 | 0.4298823 | 0.3889727 | 1 | SPHK2 |
| Biological Process | GO:0043980 | histone H2B-K12 acetylation                                                                   | 1/2279 | 1/18866 | 0.1207993 | 0.4298823 | 0.3889727 | 1 | SPHK2 |
| Biological Process | GO:0044328 | canonical Wnt signaling pathway involved in positive regulation of endothelial cell migration | 1/2279 | 1/18866 | 0.1207993 | 0.4298823 | 0.3889727 | 1 | PLPP3 |
| Biological Process | GO:0044329 | canonical Wnt signaling pathway involved in positive regulation of cell-cell adhesion         | 1/2279 | 1/18866 | 0.1207993 | 0.4298823 | 0.3889727 | 1 | PLPP3 |
| Biological Process | GO:0044330 | canonical Wnt signaling pathway involved in positive regulation of wound healing              | 1/2279 | 1/18866 | 0.1207993 | 0.4298823 | 0.3889727 | 1 | PLPP3 |
| Biological Process | GO:0044651 | adhesion of symbiont to host epithelial cell                                                  | 1/2279 | 1/18866 | 0.1207993 | 0.4298823 | 0.3889727 | 1 | SFTPD |
| Biological Process | GO:0044858 | plasma membrane raft polarization                                                             | 1/2279 | 1/18866 | 0.1207993 | 0.4298823 | 0.3889727 | 1 | GSN   |
| Biological Process | GO:0045828 | positive regulation of isoprenoid metabolic process                                           | 1/2279 | 1/18866 | 0.1207993 | 0.4298823 | 0.3889727 | 1 | RDH10 |
| Biological Process | GO:0045951 | positive regulation of mitotic recombination                                                  | 1/2279 | 1/18866 | 0.1207993 | 0.4298823 | 0.3889727 | 1 | ERCC2 |



|                    |            |                                                              |        |         |           |           |           |   |        |
|--------------------|------------|--------------------------------------------------------------|--------|---------|-----------|-----------|-----------|---|--------|
| Biological Process | GO:0046054 | dGMP metabolic process                                       | 1/2279 | 1/18866 | 0.1207993 | 0.4298823 | 0.3889727 | 1 | GUK1   |
| Biological Process | GO:0046092 | deoxycytidine metabolic process                              | 1/2279 | 1/18866 | 0.1207993 | 0.4298823 | 0.3889727 | 1 | TK2    |
| Biological Process | GO:0046204 | nor-spermidine metabolic process                             | 1/2279 | 1/18866 | 0.1207993 | 0.4298823 | 0.3889727 | 1 | SAT2   |
| Biological Process | GO:0046210 | nitric oxide catabolic process                               | 1/2279 | 1/18866 | 0.1207993 | 0.4298823 | 0.3889727 | 1 | POR    |
| Biological Process | GO:0046317 | regulation of glucosylceramide biosynthetic process          | 1/2279 | 1/18866 | 0.1207993 | 0.4298823 | 0.3889727 | 1 | PRKAA1 |
| Biological Process | GO:0046318 | negative regulation of glucosylceramide biosynthetic process | 1/2279 | 1/18866 | 0.1207993 | 0.4298823 | 0.3889727 | 1 | PRKAA1 |
| Biological Process | GO:0046495 | nicotinamide riboside metabolic process                      | 1/2279 | 1/18866 | 0.1207993 | 0.4298823 | 0.3889727 | 1 | PNP    |
| Biological Process | GO:0046587 | positive regulation of calcium-dependent cell-cell adhesion  | 1/2279 | 1/18866 | 0.1207993 | 0.4298823 | 0.3889727 | 1 | KIFAP3 |
| Biological Process | GO:0046657 | folic acid catabolic process                                 | 1/2279 | 1/18866 | 0.1207993 | 0.4298823 | 0.3889727 | 1 | MTHFS  |

|                    |            |                                                                  |        |         |           |           |           |   |        |
|--------------------|------------|------------------------------------------------------------------|--------|---------|-----------|-----------|-----------|---|--------|
| Biological Process | GO:0046671 | negative regulation of retinal cell programmed cell death        | 1/2279 | 1/18866 | 0.1207993 | 0.4298823 | 0.3889727 | 1 | BCL2   |
| Biological Process | GO:0046690 | response to tellurium ion                                        | 1/2279 | 1/18866 | 0.1207993 | 0.4298823 | 0.3889727 | 1 | HMGCS1 |
| Biological Process | GO:0046711 | GDP biosynthetic process                                         | 1/2279 | 1/18866 | 0.1207993 | 0.4298823 | 0.3889727 | 1 | GUK1   |
| Biological Process | GO:0046786 | viral replication complex formation and maintenance              | 1/2279 | 1/18866 | 0.1207993 | 0.4298823 | 0.3889727 | 1 | PI4KA  |
| Biological Process | GO:0048219 | inter-Golgi cisterna vesicle-mediated transport                  | 1/2279 | 1/18866 | 0.1207993 | 0.4298823 | 0.3889727 | 1 | COG5   |
| Biological Process | GO:0048321 | axial mesodermal cell differentiation                            | 1/2279 | 1/18866 | 0.1207993 | 0.4298823 | 0.3889727 | 1 | NODAL  |
| Biological Process | GO:0048322 | axial mesodermal cell fate commitment                            | 1/2279 | 1/18866 | 0.1207993 | 0.4298823 | 0.3889727 | 1 | NODAL  |
| Biological Process | GO:0048327 | axial mesodermal cell fate specification                         | 1/2279 | 1/18866 | 0.1207993 | 0.4298823 | 0.3889727 | 1 | NODAL  |
| Biological Process | GO:0048698 | negative regulation of collateral sprouting in absence of injury | 1/2279 | 1/18866 | 0.1207993 | 0.4298823 | 0.3889727 | 1 | SPART  |

|                    |            |                                                       |        |         |           |           |           |   |         |
|--------------------|------------|-------------------------------------------------------|--------|---------|-----------|-----------|-----------|---|---------|
| Biological Process | GO:0050668 | positive regulation of homocysteine metabolic process | 1/2279 | 1/18866 | 0.1207993 | 0.4298823 | 0.3889727 | 1 | COMT    |
| Biological Process | GO:0051107 | negative regulation of DNA ligation                   | 1/2279 | 1/18866 | 0.1207993 | 0.4298823 | 0.3889727 | 1 | TFIP11  |
| Biological Process | GO:0051141 | negative regulation of NK T cell proliferation        | 1/2279 | 1/18866 | 0.1207993 | 0.4298823 | 0.3889727 | 1 | ZBTB7B  |
| Biological Process | GO:0051232 | meiotic spindle elongation                            | 1/2279 | 1/18866 | 0.1207993 | 0.4298823 | 0.3889727 | 1 | PPP2R1A |
| Biological Process | GO:0051460 | negative regulation of corticotropin secretion        | 1/2279 | 1/18866 | 0.1207993 | 0.4298823 | 0.3889727 | 1 | CRHBP   |
| Biological Process | GO:0051686 | establishment of ER localization                      | 1/2279 | 1/18866 | 0.1207993 | 0.4298823 | 0.3889727 | 1 | MYO5A   |
| Biological Process | GO:0051780 | behavioral response to nutrient                       | 1/2279 | 1/18866 | 0.1207993 | 0.4298823 | 0.3889727 | 1 | SLC16A1 |
| Biological Process | GO:0051796 | negative regulation of timing of catagen              | 1/2279 | 1/18866 | 0.1207993 | 0.4298823 | 0.3889727 | 1 | CDH3    |
| Biological Process | GO:0055048 | anastral spindle assembly                             | 1/2279 | 1/18866 | 0.1207993 | 0.4298823 | 0.3889727 | 1 | NUMA1   |

|                    |            |                                                                                                        |        |         |           |           |           |   |         |
|--------------------|------------|--------------------------------------------------------------------------------------------------------|--------|---------|-----------|-----------|-----------|---|---------|
| Biological Process | GO:0060010 | Sertoli cell fate commitment                                                                           | 1/2279 | 1/18866 | 0.1207993 | 0.4298823 | 0.3889727 | 1 | RARA    |
| Biological Process | GO:0060243 | negative regulation of cell growth involved in contact inhibition                                      | 1/2279 | 1/18866 | 0.1207993 | 0.4298823 | 0.3889727 | 1 | CDHR2   |
| Biological Process | GO:0060377 | negative regulation of mast cell differentiation                                                       | 1/2279 | 1/18866 | 0.1207993 | 0.4298823 | 0.3889727 | 1 | ZFPM1   |
| Biological Process | GO:0060460 | left lung morphogenesis                                                                                | 1/2279 | 1/18866 | 0.1207993 | 0.4298823 | 0.3889727 | 1 | NODAL   |
| Biological Process | GO:0060466 | activation of meiosis involved in egg activation                                                       | 1/2279 | 1/18866 | 0.1207993 | 0.4298823 | 0.3889727 | 1 | PLCB1   |
| Biological Process | GO:0060731 | positive regulation of intestinal epithelial structure maintenance                                     | 1/2279 | 1/18866 | 0.1207993 | 0.4298823 | 0.3889727 | 1 | SLC22A5 |
| Biological Process | GO:0060802 | epiblast cell-extraembryonic ectoderm cell signaling involved in anterior/posterior axis specification | 1/2279 | 1/18866 | 0.1207993 | 0.4298823 | 0.3889727 | 1 | NODAL   |
| Biological Process | GO:0060843 | venous endothelial cell differentiation                                                                | 1/2279 | 1/18866 | 0.1207993 | 0.4298823 | 0.3889727 | 1 | NOTCH1  |
| Biological Process | GO:0060853 | Notch signaling pathway involved in arterial endothelial cell fate commitment                          | 1/2279 | 1/18866 | 0.1207993 | 0.4298823 | 0.3889727 | 1 | DLL1    |

|                    |            |                                                                       |        |         |           |           |           |   |        |
|--------------------|------------|-----------------------------------------------------------------------|--------|---------|-----------|-----------|-----------|---|--------|
| Biological Process | GO:0060901 | regulation of hair cycle by canonical Wnt signaling pathway           | 1/2279 | 1/18866 | 0.1207993 | 0.4298823 | 0.3889727 | 1 | CDH3   |
| Biological Process | GO:0060981 | cell migration involved in coronary angiogenesis                      | 1/2279 | 1/18866 | 0.1207993 | 0.4298823 | 0.3889727 | 1 | PDGFRB |
| Biological Process | GO:0061048 | negative regulation of branching involved in lung morphogenesis       | 1/2279 | 1/18866 | 0.1207993 | 0.4298823 | 0.3889727 | 1 | TNF    |
| Biological Process | GO:0061159 | establishment of bipolar cell polarity involved in cell morphogenesis | 1/2279 | 1/18866 | 0.1207993 | 0.4298823 | 0.3889727 | 1 | CRB1   |
| Biological Process | GO:0061171 | establishment of bipolar cell polarity                                | 1/2279 | 1/18866 | 0.1207993 | 0.4298823 | 0.3889727 | 1 | CRB1   |
| Biological Process | GO:0061360 | optic chiasma development                                             | 1/2279 | 1/18866 | 0.1207993 | 0.4298823 | 0.3889727 | 1 | PAX2   |
| Biological Process | GO:0061485 | memory T cell proliferation                                           | 1/2279 | 1/18866 | 0.1207993 | 0.4298823 | 0.3889727 | 1 | DOCK8  |
| Biological Process | GO:0061534 | gamma-aminobutyric acid secretion, neurotransmission                  | 1/2279 | 1/18866 | 0.1207993 | 0.4298823 | 0.3889727 | 1 | NF1    |
| Biological Process | GO:0061580 | colon epithelial cell migration                                       | 1/2279 | 1/18866 | 0.1207993 | 0.4298823 | 0.3889727 | 1 | ARSB   |

|                    |            |                                                                                                 |        |         |           |           |           |   |         |
|--------------------|------------|-------------------------------------------------------------------------------------------------|--------|---------|-----------|-----------|-----------|---|---------|
| Biological Process | GO:0061736 | engulfment of target by autophagosome                                                           | 1/2279 | 1/18866 | 0.1207993 | 0.4298823 | 0.3889727 | 1 | SMURF1  |
| Biological Process | GO:0061753 | substrate localization to autophagosome                                                         | 1/2279 | 1/18866 | 0.1207993 | 0.4298823 | 0.3889727 | 1 | SMURF1  |
| Biological Process | GO:0061767 | negative regulation of lung blood pressure                                                      | 1/2279 | 1/18866 | 0.1207993 | 0.4298823 | 0.3889727 | 1 | SMAD3   |
| Biological Process | GO:0061910 | autophagosome-endosome fusion                                                                   | 1/2279 | 1/18866 | 0.1207993 | 0.4298823 | 0.3889727 | 1 | RUBCNL  |
| Biological Process | GO:0062036 | sensory perception of hot stimulus                                                              | 1/2279 | 1/18866 | 0.1207993 | 0.4298823 | 0.3889727 | 1 | WDR47   |
| Biological Process | GO:0070054 | mRNA splicing, via endonucleolytic cleavage and ligation                                        | 1/2279 | 1/18866 | 0.1207993 | 0.4298823 | 0.3889727 | 1 | ERN1    |
| Biological Process | GO:0070429 | negative regulation of nucleotide-binding oligomerization domain containing 1 signaling pathway | 1/2279 | 1/18866 | 0.1207993 | 0.4298823 | 0.3889727 | 1 | TNFAIP3 |
| Biological Process | GO:0070637 | pyridine nucleoside metabolic process                                                           | 1/2279 | 1/18866 | 0.1207993 | 0.4298823 | 0.3889727 | 1 | PNP     |
| Biological Process | GO:0070638 | pyridine nucleoside catabolic process                                                           | 1/2279 | 1/18866 | 0.1207993 | 0.4298823 | 0.3889727 | 1 | PNP     |

|                    |            |                                                        |        |         |           |           |           |   |         |
|--------------------|------------|--------------------------------------------------------|--------|---------|-----------|-----------|-----------|---|---------|
| Biological Process | GO:0070715 | sodium-dependent organic cation transport              | 1/2279 | 1/18866 | 0.1207993 | 0.4298823 | 0.3889727 | 1 | SLC22A5 |
| Biological Process | GO:0070926 | regulation of ATP:ADP antiporter activity              | 1/2279 | 1/18866 | 0.1207993 | 0.4298823 | 0.3889727 | 1 | RIPK1   |
| Biological Process | GO:0070946 | neutrophil-mediated killing of gram-positive bacterium | 1/2279 | 1/18866 | 0.1207993 | 0.4298823 | 0.3889727 | 1 | CTSG    |
| Biological Process | GO:0071245 | cellular response to carbon monoxide                   | 1/2279 | 1/18866 | 0.1207993 | 0.4298823 | 0.3889727 | 1 | DNM2    |
| Biological Process | GO:0071348 | cellular response to interleukin-11                    | 1/2279 | 1/18866 | 0.1207993 | 0.4298823 | 0.3889727 | 1 | SBNO2   |
| Biological Process | GO:0071401 | cellular response to triglyceride                      | 1/2279 | 1/18866 | 0.1207993 | 0.4298823 | 0.3889727 | 1 | GPLD1   |
| Biological Process | GO:0071529 | cementum mineralization                                | 1/2279 | 1/18866 | 0.1207993 | 0.4298823 | 0.3889727 | 1 | ALPL    |
| Biological Process | GO:0071544 | diphosphoinositol polyphosphate catabolic process      | 1/2279 | 1/18866 | 0.1207993 | 0.4298823 | 0.3889727 | 1 | NUDT3   |
| Biological Process | GO:0071802 | negative regulation of podosome assembly               | 1/2279 | 1/18866 | 0.1207993 | 0.4298823 | 0.3889727 | 1 | ARHGEF2 |

|                    |            |                                                                                                                  |        |         |           |           |           |   |         |
|--------------------|------------|------------------------------------------------------------------------------------------------------------------|--------|---------|-----------|-----------|-----------|---|---------|
| Biological Process | GO:0072019 | proximal convoluted tubule development                                                                           | 1/2279 | 1/18866 | 0.1207993 | 0.4298823 | 0.3889727 | 1 | ACAT1   |
| Biological Process | GO:0072229 | metanephric proximal convoluted tubule development                                                               | 1/2279 | 1/18866 | 0.1207993 | 0.4298823 | 0.3889727 | 1 | ACAT1   |
| Biological Process | GO:0072255 | metanephric glomerular mesangial cell development                                                                | 1/2279 | 1/18866 | 0.1207993 | 0.4298823 | 0.3889727 | 1 | PDGFB   |
| Biological Process | GO:0072382 | minus-end-directed vesicle transport along microtubule                                                           | 1/2279 | 1/18866 | 0.1207993 | 0.4298823 | 0.3889727 | 1 | DYNC1H1 |
| Biological Process | GO:0072428 | signal transduction involved in intra-S DNA damage checkpoint                                                    | 1/2279 | 1/18866 | 0.1207993 | 0.4298823 | 0.3889727 | 1 | CHEK2   |
| Biological Process | GO:0075523 | viral translational frameshifting                                                                                | 1/2279 | 1/18866 | 0.1207993 | 0.4298823 | 0.3889727 | 1 | SHFL    |
| Biological Process | GO:0085018 | maintenance of symbiont-containing vacuole by host                                                               | 1/2279 | 1/18866 | 0.1207993 | 0.4298823 | 0.3889727 | 1 | AQP1    |
| Biological Process | GO:0085032 | modulation by symbiont of host I-kappaB kinase/NF-kappaB cascade                                                 | 1/2279 | 1/18866 | 0.1207993 | 0.4298823 | 0.3889727 | 1 | TNIP1   |
| Biological Process | GO:0086024 | adenylate cyclase-activating adrenergic receptor signaling pathway involved in positive regulation of heart rate | 1/2279 | 1/18866 | 0.1207993 | 0.4298823 | 0.3889727 | 1 | PDE4D   |



|                    |            |                                                                                                   |        |         |           |           |           |   |         |
|--------------------|------------|---------------------------------------------------------------------------------------------------|--------|---------|-----------|-----------|-----------|---|---------|
| Biological Process | GO:0086044 | atrial cardiac muscle cell to AV node cell communication by electrical coupling                   | 1/2279 | 1/18866 | 0.1207993 | 0.4298823 | 0.3889727 | 1 | GJA5    |
| Biological Process | GO:0086054 | bundle of His cell to Purkinje myocyte communication by electrical coupling                       | 1/2279 | 1/18866 | 0.1207993 | 0.4298823 | 0.3889727 | 1 | GJA5    |
| Biological Process | GO:0086055 | Purkinje myocyte to ventricular cardiac muscle cell communication by electrical coupling          | 1/2279 | 1/18866 | 0.1207993 | 0.4298823 | 0.3889727 | 1 | GJA5    |
| Biological Process | GO:0090010 | transforming growth factor beta receptor signaling pathway involved in primitive streak formation | 1/2279 | 1/18866 | 0.1207993 | 0.4298823 | 0.3889727 | 1 | NODAL   |
| Biological Process | GO:0090138 | regulation of actin cytoskeleton organization by cell-cell adhesion                               | 1/2279 | 1/18866 | 0.1207993 | 0.4298823 | 0.3889727 | 1 | JAM3    |
| Biological Process | GO:0090242 | retinoic acid receptor signaling pathway involved in somitogenesis                                | 1/2279 | 1/18866 | 0.1207993 | 0.4298823 | 0.3889727 | 1 | ALDH1A2 |
| Biological Process | GO:0090282 | positive regulation of transcription involved in G2/M transition of mitotic cell cycle            | 1/2279 | 1/18866 | 0.1207993 | 0.4298823 | 0.3889727 | 1 | ESRRB   |
| Biological Process | GO:0090340 | positive regulation of secretion of lysosomal enzymes                                             | 1/2279 | 1/18866 | 0.1207993 | 0.4298823 | 0.3889727 | 1 | NR1H2   |
| Biological Process | GO:0090410 | malonate catabolic process                                                                        | 1/2279 | 1/18866 | 0.1207993 | 0.4298823 | 0.3889727 | 1 | ACSF3   |

|                    |            |                                                                      |        |         |           |           |           |   |        |
|--------------------|------------|----------------------------------------------------------------------|--------|---------|-----------|-----------|-----------|---|--------|
| Biological Process | GO:0090625 | mRNA cleavage involved in gene silencing by siRNA                    | 1/2279 | 1/18866 | 0.1207993 | 0.4298823 | 0.3889727 | 1 | AGO2   |
| Biological Process | GO:0090720 | primary adaptive immune response                                     | 1/2279 | 1/18866 | 0.1207993 | 0.4298823 | 0.3889727 | 1 | BACH2  |
| Biological Process | GO:0090721 | primary adaptive immune response involving T cells and B cells       | 1/2279 | 1/18866 | 0.1207993 | 0.4298823 | 0.3889727 | 1 | BACH2  |
| Biological Process | GO:0097045 | phosphatidylserine exposure on blood platelet                        | 1/2279 | 1/18866 | 0.1207993 | 0.4298823 | 0.3889727 | 1 | ANO6   |
| Biological Process | GO:0097510 | base-excision repair, AP site formation via deaminated base removal  | 1/2279 | 1/18866 | 0.1207993 | 0.4298823 | 0.3889727 | 1 | UNG    |
| Biological Process | GO:0098906 | regulation of Purkinje myocyte action potential                      | 1/2279 | 1/18866 | 0.1207993 | 0.4298823 | 0.3889727 | 1 | GJA5   |
| Biological Process | GO:0099089 | establishment of endoplasmic reticulum localization to postsynapse   | 1/2279 | 1/18866 | 0.1207993 | 0.4298823 | 0.3889727 | 1 | MYO5A  |
| Biological Process | GO:0099564 | modification of synaptic structure, modulating synaptic transmission | 1/2279 | 1/18866 | 0.1207993 | 0.4298823 | 0.3889727 | 1 | BAIAP2 |
| Biological Process | GO:0099588 | positive regulation of postsynaptic cytosolic calcium concentration  | 1/2279 | 1/18866 | 0.1207993 | 0.4298823 | 0.3889727 | 1 | SYNPO  |

|                    |            |                                                                 |        |         |           |           |           |   |        |
|--------------------|------------|-----------------------------------------------------------------|--------|---------|-----------|-----------|-----------|---|--------|
| Biological Process | GO:0106096 | response to ceramide                                            | 1/2279 | 1/18866 | 0.1207993 | 0.4298823 | 0.3889727 | 1 | PDGFRB |
| Biological Process | GO:0110028 | positive regulation of mitotic spindle organization             | 1/2279 | 1/18866 | 0.1207993 | 0.4298823 | 0.3889727 | 1 | NUMA1  |
| Biological Process | GO:0120093 | regulation of peptidyl-lysine crotonylation                     | 1/2279 | 1/18866 | 0.1207993 | 0.4298823 | 0.3889727 | 1 | CDYL   |
| Biological Process | GO:0120094 | negative regulation of peptidyl-lysine crotonylation            | 1/2279 | 1/18866 | 0.1207993 | 0.4298823 | 0.3889727 | 1 | CDYL   |
| Biological Process | GO:0120158 | positive regulation of collagen catabolic process               | 1/2279 | 1/18866 | 0.1207993 | 0.4298823 | 0.3889727 | 1 | VSIR   |
| Biological Process | GO:0120168 | detection of hot stimulus involved in thermoception             | 1/2279 | 1/18866 | 0.1207993 | 0.4298823 | 0.3889727 | 1 | WDR47  |
| Biological Process | GO:0150089 | multiple spine synapse organization                             | 1/2279 | 1/18866 | 0.1207993 | 0.4298823 | 0.3889727 | 1 | CX3CR1 |
| Biological Process | GO:0150090 | multiple spine synapse organization, single dendrite            | 1/2279 | 1/18866 | 0.1207993 | 0.4298823 | 0.3889727 | 1 | CX3CR1 |
| Biological Process | GO:1900010 | regulation of corticotropin-releasing hormone receptor activity | 1/2279 | 1/18866 | 0.1207993 | 0.4298823 | 0.3889727 | 1 | CRHBP  |

|                    |            |                                                                                                                                      |        |         |           |           |           |   |         |
|--------------------|------------|--------------------------------------------------------------------------------------------------------------------------------------|--------|---------|-----------|-----------|-----------|---|---------|
| Biological Process | GO:1900011 | negative regulation of corticotropin-releasing hormone receptor activity                                                             | 1/2279 | 1/18866 | 0.1207993 | 0.4298823 | 0.3889727 | 1 | CRHBP   |
| Biological Process | GO:1900054 | positive regulation of retinoic acid biosynthetic process                                                                            | 1/2279 | 1/18866 | 0.1207993 | 0.4298823 | 0.3889727 | 1 | RDH10   |
| Biological Process | GO:1900134 | negative regulation of renin secretion into blood stream                                                                             | 1/2279 | 1/18866 | 0.1207993 | 0.4298823 | 0.3889727 | 1 | F2R     |
| Biological Process | GO:1900148 | negative regulation of Schwann cell migration                                                                                        | 1/2279 | 1/18866 | 0.1207993 | 0.4298823 | 0.3889727 | 1 | CERS2   |
| Biological Process | GO:1900159 | positive regulation of bone mineralization involved in bone maturation                                                               | 1/2279 | 1/18866 | 0.1207993 | 0.4298823 | 0.3889727 | 1 | LTF     |
| Biological Process | GO:1900477 | negative regulation of G1/S transition of mitotic cell cycle by negative regulation of transcription from RNA polymerase II promoter | 1/2279 | 1/18866 | 0.1207993 | 0.4298823 | 0.3889727 | 1 | NACC2   |
| Biological Process | GO:1900480 | regulation of diacylglycerol biosynthetic process                                                                                    | 1/2279 | 1/18866 | 0.1207993 | 0.4298823 | 0.3889727 | 1 | AVIL    |
| Biological Process | GO:1900749 | (R)-carnitine transport                                                                                                              | 1/2279 | 1/18866 | 0.1207993 | 0.4298823 | 0.3889727 | 1 | SLC22A5 |
| Biological Process | GO:1900753 | doxorubicin transport                                                                                                                | 1/2279 | 1/18866 | 0.1207993 | 0.4298823 | 0.3889727 | 1 | RALBP1  |

|                    |            |                                                                                                        |        |         |           |           |           |   |         |
|--------------------|------------|--------------------------------------------------------------------------------------------------------|--------|---------|-----------|-----------|-----------|---|---------|
| Biological Process | GO:1901086 | benzylpenicillin metabolic process                                                                     | 1/2279 | 1/18866 | 0.1207993 | 0.4298823 | 0.3889727 | 1 | ABCC2   |
| Biological Process | GO:1901189 | positive regulation of ephrin receptor signaling pathway                                               | 1/2279 | 1/18866 | 0.1207993 | 0.4298823 | 0.3889727 | 1 | RBPJ    |
| Biological Process | GO:1901297 | positive regulation of canonical Wnt signaling pathway involved in cardiac muscle cell fate commitment | 1/2279 | 1/18866 | 0.1207993 | 0.4298823 | 0.3889727 | 1 | RBPJ    |
| Biological Process | GO:1901609 | negative regulation of vesicle transport along microtubule                                             | 1/2279 | 1/18866 | 0.1207993 | 0.4298823 | 0.3889727 | 1 | CNIH2   |
| Biological Process | GO:1901676 | positive regulation of histone H3-K27 acetylation                                                      | 1/2279 | 1/18866 | 0.1207993 | 0.4298823 | 0.3889727 | 1 | LIF     |
| Biological Process | GO:1901999 | homogentisate metabolic process                                                                        | 1/2279 | 1/18866 | 0.1207993 | 0.4298823 | 0.3889727 | 1 | FAH     |
| Biological Process | GO:1902000 | homogentisate catabolic process                                                                        | 1/2279 | 1/18866 | 0.1207993 | 0.4298823 | 0.3889727 | 1 | FAH     |
| Biological Process | GO:1902204 | positive regulation of hepatocyte growth factor receptor signaling pathway                             | 1/2279 | 1/18866 | 0.1207993 | 0.4298823 | 0.3889727 | 1 | ESM1    |
| Biological Process | GO:1902270 | (R)-carnitine transmembrane transport                                                                  | 1/2279 | 1/18866 | 0.1207993 | 0.4298823 | 0.3889727 | 1 | SLC22A5 |

|                    |            |                                                                  |        |         |           |           |           |   |       |
|--------------------|------------|------------------------------------------------------------------|--------|---------|-----------|-----------|-----------|---|-------|
| Biological Process | GO:1902363 | regulation of protein localization to spindle pole body          | 1/2279 | 1/18866 | 0.1207993 | 0.4298823 | 0.3889727 | 1 | NUMA1 |
| Biological Process | GO:1902365 | positive regulation of protein localization to spindle pole body | 1/2279 | 1/18866 | 0.1207993 | 0.4298823 | 0.3889727 | 1 | NUMA1 |
| Biological Process | GO:1902551 | regulation of catalase activity                                  | 1/2279 | 1/18866 | 0.1207993 | 0.4298823 | 0.3889727 | 1 | SIRT3 |
| Biological Process | GO:1902553 | positive regulation of catalase activity                         | 1/2279 | 1/18866 | 0.1207993 | 0.4298823 | 0.3889727 | 1 | SIRT3 |
| Biological Process | GO:1902684 | negative regulation of receptor localization to synapse          | 1/2279 | 1/18866 | 0.1207993 | 0.4298823 | 0.3889727 | 1 | CNIH2 |
| Biological Process | GO:1902761 | positive regulation of chondrocyte development                   | 1/2279 | 1/18866 | 0.1207993 | 0.4298823 | 0.3889727 | 1 | SMAD7 |
| Biological Process | GO:1902769 | regulation of choline O-acetyltransferase activity               | 1/2279 | 1/18866 | 0.1207993 | 0.4298823 | 0.3889727 | 1 | SORL1 |
| Biological Process | GO:1902771 | positive regulation of choline O-acetyltransferase activity      | 1/2279 | 1/18866 | 0.1207993 | 0.4298823 | 0.3889727 | 1 | SORL1 |
| Biological Process | GO:1902804 | negative regulation of synaptic vesicle transport                | 1/2279 | 1/18866 | 0.1207993 | 0.4298823 | 0.3889727 | 1 | CNIH2 |

|                    |            |                                                                       |        |         |           |           |           |   |       |
|--------------------|------------|-----------------------------------------------------------------------|--------|---------|-----------|-----------|-----------|---|-------|
| Biological Process | GO:1902846 | positive regulation of mitotic spindle elongation                     | 1/2279 | 1/18866 | 0.1207993 | 0.4298823 | 0.3889727 | 1 | NUMA1 |
| Biological Process | GO:1902847 | regulation of neuronal signal transduction                            | 1/2279 | 1/18866 | 0.1207993 | 0.4298823 | 0.3889727 | 1 | CLU   |
| Biological Process | GO:1902858 | propionyl-CoA metabolic process                                       | 1/2279 | 1/18866 | 0.1207993 | 0.4298823 | 0.3889727 | 1 | ACAT1 |
| Biological Process | GO:1902860 | propionyl-CoA biosynthetic process                                    | 1/2279 | 1/18866 | 0.1207993 | 0.4298823 | 0.3889727 | 1 | ACAT1 |
| Biological Process | GO:1902910 | positive regulation of melanosome transport                           | 1/2279 | 1/18866 | 0.1207993 | 0.4298823 | 0.3889727 | 1 | CDH3  |
| Biological Process | GO:1902955 | positive regulation of early endosome to recycling endosome transport | 1/2279 | 1/18866 | 0.1207993 | 0.4298823 | 0.3889727 | 1 | SORL1 |
| Biological Process | GO:1902997 | negative regulation of neurofibrillary tangle assembly                | 1/2279 | 1/18866 | 0.1207993 | 0.4298823 | 0.3889727 | 1 | SORL1 |
| Biological Process | GO:1902998 | positive regulation of neurofibrillary tangle assembly                | 1/2279 | 1/18866 | 0.1207993 | 0.4298823 | 0.3889727 | 1 | CLU   |
| Biological Process | GO:1903041 | regulation of chondrocyte hypertrophy                                 | 1/2279 | 1/18866 | 0.1207993 | 0.4298823 | 0.3889727 | 1 | SMAD7 |

|                    |            |                                                                    |        |         |           |           |           |   |        |
|--------------------|------------|--------------------------------------------------------------------|--------|---------|-----------|-----------|-----------|---|--------|
| Biological Process | GO:1903043 | positive regulation of chondrocyte hypertrophy                     | 1/2279 | 1/18866 | 0.1207993 | 0.4298823 | 0.3889727 | 1 | SMAD7  |
| Biological Process | GO:1903406 | regulation of sodium:potassium-exchanging ATPase activity          | 1/2279 | 1/18866 | 0.1207993 | 0.4298823 | 0.3889727 | 1 | DNM2   |
| Biological Process | GO:1903408 | positive regulation of sodium:potassium-exchanging ATPase activity | 1/2279 | 1/18866 | 0.1207993 | 0.4298823 | 0.3889727 | 1 | DNM2   |
| Biological Process | GO:1903435 | positive regulation of constitutive secretory pathway              | 1/2279 | 1/18866 | 0.1207993 | 0.4298823 | 0.3889727 | 1 | RAB27A |
| Biological Process | GO:1903465 | positive regulation of mitotic cell cycle DNA replication          | 1/2279 | 1/18866 | 0.1207993 | 0.4298823 | 0.3889727 | 1 | FGFR1  |
| Biological Process | GO:1903568 | negative regulation of protein localization to ciliary membrane    | 1/2279 | 1/18866 | 0.1207993 | 0.4298823 | 0.3889727 | 1 | LZTFL1 |
| Biological Process | GO:1903743 | negative regulation of anterograde synaptic vesicle transport      | 1/2279 | 1/18866 | 0.1207993 | 0.4298823 | 0.3889727 | 1 | CNIH2  |
| Biological Process | GO:1903788 | positive regulation of glutathione biosynthetic process            | 1/2279 | 1/18866 | 0.1207993 | 0.4298823 | 0.3889727 | 1 | NFE2L2 |
| Biological Process | GO:1903803 | L-glutamine import across plasma membrane                          | 1/2279 | 1/18866 | 0.1207993 | 0.4298823 | 0.3889727 | 1 | SLC1A5 |



|                    |            |                                                                               |        |         |           |           |           |   |        |
|--------------------|------------|-------------------------------------------------------------------------------|--------|---------|-----------|-----------|-----------|---|--------|
| Biological Process | GO:1903810 | L-histidine import across plasma membrane                                     | 1/2279 | 1/18866 | 0.1207993 | 0.4298823 | 0.3889727 | 1 | SLC7A1 |
| Biological Process | GO:1903906 | regulation of plasma membrane raft polarization                               | 1/2279 | 1/18866 | 0.1207993 | 0.4298823 | 0.3889727 | 1 | GSN    |
| Biological Process | GO:1903918 | regulation of actin filament severing                                         | 1/2279 | 1/18866 | 0.1207993 | 0.4298823 | 0.3889727 | 1 | MYH9   |
| Biological Process | GO:1903919 | negative regulation of actin filament severing                                | 1/2279 | 1/18866 | 0.1207993 | 0.4298823 | 0.3889727 | 1 | MYH9   |
| Biological Process | GO:1903925 | response to bisphenol A                                                       | 1/2279 | 1/18866 | 0.1207993 | 0.4298823 | 0.3889727 | 1 | CHEK2  |
| Biological Process | GO:1903926 | cellular response to bisphenol A                                              | 1/2279 | 1/18866 | 0.1207993 | 0.4298823 | 0.3889727 | 1 | CHEK2  |
| Biological Process | GO:1903996 | negative regulation of non-membrane spanning protein tyrosine kinase activity | 1/2279 | 1/18866 | 0.1207993 | 0.4298823 | 0.3889727 | 1 | DUSP22 |
| Biological Process | GO:1904210 | VCP-NPL4-UFD1 AAA ATPase complex assembly                                     | 1/2279 | 1/18866 | 0.1207993 | 0.4298823 | 0.3889727 | 1 | SVIP   |
| Biological Process | GO:1904239 | regulation of VCP-NPL4-UFD1 AAA ATPase complex assembly                       | 1/2279 | 1/18866 | 0.1207993 | 0.4298823 | 0.3889727 | 1 | SVIP   |

|                    |            |                                                                    |        |         |           |           |           |   |         |
|--------------------|------------|--------------------------------------------------------------------|--------|---------|-----------|-----------|-----------|---|---------|
| Biological Process | GO:1904240 | negative regulation of VCP-NPL4-UFD1 AAA ATPase complex assembly   | 1/2279 | 1/18866 | 0.1207993 | 0.4298823 | 0.3889727 | 1 | SVIP    |
| Biological Process | GO:1904247 | positive regulation of polynucleotide adenylyltransferase activity | 1/2279 | 1/18866 | 0.1207993 | 0.4298823 | 0.3889727 | 1 | PABPN1  |
| Biological Process | GO:1904270 | pyroptosome complex assembly                                       | 1/2279 | 1/18866 | 0.1207993 | 0.4298823 | 0.3889727 | 1 | AIM2    |
| Biological Process | GO:1904535 | positive regulation of telomeric loop disassembly                  | 1/2279 | 1/18866 | 0.1207993 | 0.4298823 | 0.3889727 | 1 | RTEL1   |
| Biological Process | GO:1904647 | response to rotenone                                               | 1/2279 | 1/18866 | 0.1207993 | 0.4298823 | 0.3889727 | 1 | KIF1B   |
| Biological Process | GO:1904676 | negative regulation of somatic stem cell division                  | 1/2279 | 1/18866 | 0.1207993 | 0.4298823 | 0.3889727 | 1 | MIR145  |
| Biological Process | GO:1904677 | positive regulation of somatic stem cell division                  | 1/2279 | 1/18866 | 0.1207993 | 0.4298823 | 0.3889727 | 1 | LBH     |
| Biological Process | GO:1904766 | negative regulation of macroautophagy by TORC1 signaling           | 1/2279 | 1/18866 | 0.1207993 | 0.4298823 | 0.3889727 | 1 | CLEC16A |
| Biological Process | GO:1904799 | regulation of neuron remodeling                                    | 1/2279 | 1/18866 | 0.1207993 | 0.4298823 | 0.3889727 | 1 | BCL11A  |

|                    |            |                                                                                          |        |         |           |           |           |   |        |
|--------------------|------------|------------------------------------------------------------------------------------------|--------|---------|-----------|-----------|-----------|---|--------|
| Biological Process | GO:1904800 | negative regulation of neuron remodeling                                                 | 1/2279 | 1/18866 | 0.1207993 | 0.4298823 | 0.3889727 | 1 | BCL11A |
| Biological Process | GO:1904876 | negative regulation of DNA ligase activity                                               | 1/2279 | 1/18866 | 0.1207993 | 0.4298823 | 0.3889727 | 1 | TFIP11 |
| Biological Process | GO:1904897 | regulation of hepatic stellate cell proliferation                                        | 1/2279 | 1/18866 | 0.1207993 | 0.4298823 | 0.3889727 | 1 | MYB    |
| Biological Process | GO:1904899 | positive regulation of hepatic stellate cell proliferation                               | 1/2279 | 1/18866 | 0.1207993 | 0.4298823 | 0.3889727 | 1 | MYB    |
| Biological Process | GO:1905045 | negative regulation of Schwann cell proliferation involved in axon regeneration          | 1/2279 | 1/18866 | 0.1207993 | 0.4298823 | 0.3889727 | 1 | CERS2  |
| Biological Process | GO:1905068 | positive regulation of canonical Wnt signaling pathway involved in heart development     | 1/2279 | 1/18866 | 0.1207993 | 0.4298823 | 0.3889727 | 1 | RBPJ   |
| Biological Process | GO:1905222 | atrioventricular canal morphogenesis                                                     | 1/2279 | 1/18866 | 0.1207993 | 0.4298823 | 0.3889727 | 1 | ENG    |
| Biological Process | GO:1905226 | regulation of adhesion of symbiont to host epithelial cell                               | 1/2279 | 1/18866 | 0.1207993 | 0.4298823 | 0.3889727 | 1 | SFTPD  |
| Biological Process | GO:1905313 | transforming growth factor beta receptor signaling pathway involved in heart development | 1/2279 | 1/18866 | 0.1207993 | 0.4298823 | 0.3889727 | 1 | TGFB1  |

|                    |            |                                                                                     |        |         |           |           |           |   |        |
|--------------------|------------|-------------------------------------------------------------------------------------|--------|---------|-----------|-----------|-----------|---|--------|
| Biological Process | GO:1905317 | inferior endocardial cushion morphogenesis                                          | 1/2279 | 1/18866 | 0.1207993 | 0.4298823 | 0.3889727 | 1 | TGFBR2 |
| Biological Process | GO:1905355 | spine apparatus assembly                                                            | 1/2279 | 1/18866 | 0.1207993 | 0.4298823 | 0.3889727 | 1 | SYNPO  |
| Biological Process | GO:1905528 | positive regulation of Golgi lumen acidification                                    | 1/2279 | 1/18866 | 0.1207993 | 0.4298823 | 0.3889727 | 1 | UBE3A  |
| Biological Process | GO:1905535 | regulation of eukaryotic translation initiation factor 4F complex assembly          | 1/2279 | 1/18866 | 0.1207993 | 0.4298823 | 0.3889727 | 1 | EIF4G1 |
| Biological Process | GO:1905537 | positive regulation of eukaryotic translation initiation factor 4F complex assembly | 1/2279 | 1/18866 | 0.1207993 | 0.4298823 | 0.3889727 | 1 | EIF4G1 |
| Biological Process | GO:1905578 | regulation of ERBB3 signaling pathway                                               | 1/2279 | 1/18866 | 0.1207993 | 0.4298823 | 0.3889727 | 1 | RTN4   |
| Biological Process | GO:1905580 | positive regulation of ERBB3 signaling pathway                                      | 1/2279 | 1/18866 | 0.1207993 | 0.4298823 | 0.3889727 | 1 | RTN4   |
| Biological Process | GO:1905590 | fibronectin fibril organization                                                     | 1/2279 | 1/18866 | 0.1207993 | 0.4298823 | 0.3889727 | 1 | LOXL3  |
| Biological Process | GO:1905610 | regulation of mRNA cap binding                                                      | 1/2279 | 1/18866 | 0.1207993 | 0.4298823 | 0.3889727 | 1 | EIF4G1 |

|                    |            |                                                          |        |         |           |           |           |   |          |
|--------------------|------------|----------------------------------------------------------|--------|---------|-----------|-----------|-----------|---|----------|
| Biological Process | GO:1905612 | positive regulation of mRNA cap binding                  | 1/2279 | 1/18866 | 0.1207993 | 0.4298823 | 0.3889727 | 1 | EIF4G1   |
| Biological Process | GO:1905667 | negative regulation of protein localization to endosome  | 1/2279 | 1/18866 | 0.1207993 | 0.4298823 | 0.3889727 | 1 | ANKRD13A |
| Biological Process | GO:1905673 | positive regulation of lysosome organization             | 1/2279 | 1/18866 | 0.1207993 | 0.4298823 | 0.3889727 | 1 | GRN      |
| Biological Process | GO:1905834 | response to pyrimidine ribonucleotide                    | 1/2279 | 1/18866 | 0.1207993 | 0.4298823 | 0.3889727 | 1 | P2RY6    |
| Biological Process | GO:1905835 | cellular response to pyrimidine ribonucleotide           | 1/2279 | 1/18866 | 0.1207993 | 0.4298823 | 0.3889727 | 1 | P2RY6    |
| Biological Process | GO:1905878 | invadopodium disassembly                                 | 1/2279 | 1/18866 | 0.1207993 | 0.4298823 | 0.3889727 | 1 | NAV3     |
| Biological Process | GO:1905891 | regulation of cellular response to thapsigargin          | 1/2279 | 1/18866 | 0.1207993 | 0.4298823 | 0.3889727 | 1 | CLU      |
| Biological Process | GO:1905892 | negative regulation of cellular response to thapsigargin | 1/2279 | 1/18866 | 0.1207993 | 0.4298823 | 0.3889727 | 1 | CLU      |
| Biological Process | GO:1905894 | regulation of cellular response to tunicamycin           | 1/2279 | 1/18866 | 0.1207993 | 0.4298823 | 0.3889727 | 1 | CLU      |

|                    |            |                                                          |        |         |           |           |           |   |         |
|--------------------|------------|----------------------------------------------------------|--------|---------|-----------|-----------|-----------|---|---------|
| Biological Process | GO:1905895 | negative regulation of cellular response to tunicamycin  | 1/2279 | 1/18866 | 0.1207993 | 0.4298823 | 0.3889727 | 1 | CLU     |
| Biological Process | GO:1905927 | regulation of invadopodium disassembly                   | 1/2279 | 1/18866 | 0.1207993 | 0.4298823 | 0.3889727 | 1 | NAV3    |
| Biological Process | GO:1905929 | positive regulation of invadopodium disassembly          | 1/2279 | 1/18866 | 0.1207993 | 0.4298823 | 0.3889727 | 1 | NAV3    |
| Biological Process | GO:1990029 | vasomotion                                               | 1/2279 | 1/18866 | 0.1207993 | 0.4298823 | 0.3889727 | 1 | GJA5    |
| Biological Process | GO:1990268 | response to gold nanoparticle                            | 1/2279 | 1/18866 | 0.1207993 | 0.4298823 | 0.3889727 | 1 | MPO     |
| Biological Process | GO:1990539 | fructose import across plasma membrane                   | 1/2279 | 1/18866 | 0.1207993 | 0.4298823 | 0.3889727 | 1 | SLC2A5  |
| Biological Process | GO:1990546 | mitochondrial tricarboxylic acid transmembrane transport | 1/2279 | 1/18866 | 0.1207993 | 0.4298823 | 0.3889727 | 1 | SLC25A1 |
| Biological Process | GO:1990579 | peptidyl-serine trans-autophosphorylation                | 1/2279 | 1/18866 | 0.1207993 | 0.4298823 | 0.3889727 | 1 | ERN1    |
| Biological Process | GO:1990922 | hepatic stellate cell proliferation                      | 1/2279 | 1/18866 | 0.1207993 | 0.4298823 | 0.3889727 | 1 | MYB     |

|                    |            |                                                                                        |        |         |           |           |           |   |        |
|--------------------|------------|----------------------------------------------------------------------------------------|--------|---------|-----------|-----------|-----------|---|--------|
| Biological Process | GO:2000101 | regulation of mammary stem cell proliferation                                          | 1/2279 | 1/18866 | 0.1207993 | 0.4298823 | 0.3889727 | 1 | LBH    |
| Biological Process | GO:2000103 | positive regulation of mammary stem cell proliferation                                 | 1/2279 | 1/18866 | 0.1207993 | 0.4298823 | 0.3889727 | 1 | LBH    |
| Biological Process | GO:2000173 | negative regulation of branching morphogenesis of a nerve                              | 1/2279 | 1/18866 | 0.1207993 | 0.4298823 | 0.3889727 | 1 | BCL11A |
| Biological Process | GO:2000230 | negative regulation of pancreatic stellate cell proliferation                          | 1/2279 | 1/18866 | 0.1207993 | 0.4298823 | 0.3889727 | 1 | PPARG  |
| Biological Process | GO:2000308 | negative regulation of tumor necrosis factor (ligand) superfamily member 11 production | 1/2279 | 1/18866 | 0.1207993 | 0.4298823 | 0.3889727 | 1 | LTF    |
| Biological Process | GO:2000438 | negative regulation of monocyte extravasation                                          | 1/2279 | 1/18866 | 0.1207993 | 0.4298823 | 0.3889727 | 1 | PLCB1  |
| Biological Process | GO:2000454 | positive regulation of CD8-positive, alpha-beta cytotoxic T cell extravasation         | 1/2279 | 1/18866 | 0.1207993 | 0.4298823 | 0.3889727 | 1 | FADD   |
| Biological Process | GO:2000464 | positive regulation of astrocyte chemotaxis                                            | 1/2279 | 1/18866 | 0.1207993 | 0.4298823 | 0.3889727 | 1 | CCR2   |
| Biological Process | GO:2000559 | regulation of CD24 production                                                          | 1/2279 | 1/18866 | 0.1207993 | 0.4298823 | 0.3889727 | 1 | PLCB1  |

|                    |            |                                                                      |        |         |           |           |           |   |       |
|--------------------|------------|----------------------------------------------------------------------|--------|---------|-----------|-----------|-----------|---|-------|
| Biological Process | GO:2000560 | positive regulation of CD24 production                               | 1/2279 | 1/18866 | 0.1207993 | 0.4298823 | 0.3889727 | 1 | PLCB1 |
| Biological Process | GO:2000565 | negative regulation of CD8-positive, alpha-beta T cell proliferation | 1/2279 | 1/18866 | 0.1207993 | 0.4298823 | 0.3889727 | 1 | VSIR  |
| Biological Process | GO:2000595 | regulation of optic nerve formation                                  | 1/2279 | 1/18866 | 0.1207993 | 0.4298823 | 0.3889727 | 1 | PAX2  |
| Biological Process | GO:2000597 | positive regulation of optic nerve formation                         | 1/2279 | 1/18866 | 0.1207993 | 0.4298823 | 0.3889727 | 1 | PAX2  |
| Biological Process | GO:2000661 | positive regulation of interleukin-1-mediated signaling pathway      | 1/2279 | 1/18866 | 0.1207993 | 0.4298823 | 0.3889727 | 1 | IL1R1 |
| Biological Process | GO:2000830 | positive regulation of parathyroid hormone secretion                 | 1/2279 | 1/18866 | 0.1207993 | 0.4298823 | 0.3889727 | 1 | FGFR1 |
| Biological Process | GO:2001029 | regulation of cellular glucuronidation                               | 1/2279 | 1/18866 | 0.1207993 | 0.4298823 | 0.3889727 | 1 | PRKCE |
| Biological Process | GO:2001031 | positive regulation of cellular glucuronidation                      | 1/2279 | 1/18866 | 0.1207993 | 0.4298823 | 0.3889727 | 1 | PRKCE |
| Biological Process | GO:2001124 | regulation of translational frameshifting                            | 1/2279 | 1/18866 | 0.1207993 | 0.4298823 | 0.3889727 | 1 | SHFL  |



|                    |            |                                                                 |         |           |           |           |           |    |  |                                                                                                                                                                                        |
|--------------------|------------|-----------------------------------------------------------------|---------|-----------|-----------|-----------|-----------|----|--|----------------------------------------------------------------------------------------------------------------------------------------------------------------------------------------|
| Biological Process | GO:2001125 | negative regulation of translational frameshifting              | 1/2279  | 1/18866   | 0.1207993 | 0.4298823 | 0.3889727 | 1  |  | SHFL                                                                                                                                                                                   |
| Biological Process | GO:2001136 | negative regulation of endocytic recycling                      | 1/2279  | 1/18866   | 0.1207993 | 0.4298823 | 0.3889727 | 1  |  | ARHGAP1                                                                                                                                                                                |
| Biological Process | GO:2001176 | regulation of mediator complex assembly                         | 1/2279  | 1/18866   | 0.1207993 | 0.4298823 | 0.3889727 | 1  |  | MED25                                                                                                                                                                                  |
| Biological Process | GO:2001178 | positive regulation of mediator complex assembly                | 1/2279  | 1/18866   | 0.1207993 | 0.4298823 | 0.3889727 | 1  |  | MED25                                                                                                                                                                                  |
| Biological Process | GO:2001246 | negative regulation of phosphatidylcholine biosynthetic process | 1/2279  | 1/18866   | 0.1207993 | 0.4298823 | 0.3889727 | 1  |  | LPCAT1                                                                                                                                                                                 |
| Biological Process | GO:0030516 | regulation of axon extension                                    | 16/2279 | 97/18866  | 0.1209224 | 0.4298823 | 0.3889727 | 16 |  | SEMA6B/CTTN/DNM2/SEMA4A/RTN4/DISC1/SEMA4B/IFRD1/ILK/SEMA4D/CDH4/CDKL3/CYFIP1/TRPV2/NDEL1/DBNL                                                                                          |
| Biological Process | GO:0046890 | regulation of lipid biosynthetic process                        | 31/2279 | 207/18866 | 0.1209808 | 0.4298823 | 0.3889727 | 31 |  | PRKAG2/GFI1/CREB1/MFSD2A/IDI1/LPCAT1/VDR/MBTPS1/GPLD1/TNF/ORMDL3/ABCG1/FPR2/TNFRSF1A/SPHK2/RDH10/DGKQ/SF1/POR/NR1H2/ACACB/PDGFB/ACACA/AVIL/HMGCS1/SCD/SREBF1/WDTC1/SIRT3/ACADVL/PRKAA1 |
| Biological Process | GO:0051353 | positive regulation of oxidoreductase activity                  | 10/2279 | 55/18866  | 0.1209878 | 0.4298823 | 0.3889727 | 10 |  | VDR/TNF/GNAI2/NOS1AP/CDH3/RIPK3/POR/NOD2/AGTR1/SIRT3                                                                                                                                   |
| Biological Process | GO:0070741 | response to interleukin-6                                       | 10/2279 | 55/18866  | 0.1209878 | 0.4298823 | 0.3889727 | 10 |  | GFI1/SBNO2/CHI3L1/ABCC2/RIPK1/JAK1/PHB/FER/IL6R/RELA                                                                                                                                   |

|                    |            |                                                                  |         |           |           |           |           |    |                                                                                                                                                          |
|--------------------|------------|------------------------------------------------------------------|---------|-----------|-----------|-----------|-----------|----|----------------------------------------------------------------------------------------------------------------------------------------------------------|
| Biological Process | GO:2000649 | regulation of sodium ion transmembrane transporter activity      | 10/2279 | 55/18866  | 0.1209878 | 0.4298823 | 0.3889727 | 10 | FXYD2/YWHAH/FXYD1/DNM2/TESC/ACTN4/PRKCE/NEDD4/HECW2/FGF14                                                                                                |
| Biological Process | GO:0042058 | regulation of epidermal growth factor receptor signaling pathway | 15/2279 | 90/18866  | 0.1219429 | 0.4322431 | 0.3911089 | 15 | TGFA/ARHGEF7/NCK2/DOK1/RHBDF2/ARAP1/APP/EPS15L1/FER/PTPRJ/PDE6H/DGKD/DUSP3/EPS15/MVB12A                                                                  |
| Biological Process | GO:0098773 | skin epidermis development                                       | 15/2279 | 90/18866  | 0.1219429 | 0.4322431 | 0.3911089 | 15 | TNF/KRT17/DLL1/RBPJ/HDAC1/CDH3/MYO5A/NF1/NUMA1/BCL2/NOTCH1/TGM3/RELA/INHBA/ERCC2                                                                         |
| Biological Process | GO:0006471 | protein ADP-ribosylation                                         | 7/2279  | 35/18866  | 0.1219776 | 0.4322431 | 0.3911089 | 7  | TNKS/PARP4/ART5/ART4/PARP10/PARP9/SIRT3                                                                                                                  |
| Biological Process | GO:0035909 | aorta morphogenesis                                              | 7/2279  | 35/18866  | 0.1219776 | 0.4322431 | 0.3911089 | 7  | MIR143/MIR145/MYLK/RBPJ/ENG/NOTCH1/PDGFRB                                                                                                                |
| Biological Process | GO:0040001 | establishment of mitotic spindle localization                    | 7/2279  | 35/18866  | 0.1219776 | 0.4322431 | 0.3911089 | 7  | DCTN1/NDE1/HTT/NUMA1/ARHGEF2/FBXW11/NDEL1                                                                                                                |
| Biological Process | GO:0048821 | erythrocyte development                                          | 7/2279  | 35/18866  | 0.1219776 | 0.4322431 | 0.3911089 | 7  | MAEA/SLC11A2/BRD1/TMOD3/ALAS1/EPB42/ERCC2                                                                                                                |
| Biological Process | GO:0070884 | regulation of calcineurin-NFAT signaling cascade                 | 7/2279  | 35/18866  | 0.1219776 | 0.4322431 | 0.3911089 | 7  | TNF/CAMTA1/RCAN1/DYRK2/FHL2/CHERP/STIMATE                                                                                                                |
| Biological Process | GO:0032635 | interleukin-6 production                                         | 26/2279 | 170/18866 | 0.1220162 | 0.4322431 | 0.3911089 | 26 | IL10/IL16/C1QTNF3/MIR140/ARRB1/TNF/TNFAIP3/MIR101-2/TLR9/SPON2/C5AR2/APP/MBP/PTPN6/SCIMP/SPHK2/GHRL/CSK/BCL10/IL6R/ARRB2/IL18RAP/NOD2/POU2F2/F2R/ARHGEF2 |

|                    |            |                                                                 |         |           |           |           |           |    |                                                                                                                                                                                          |
|--------------------|------------|-----------------------------------------------------------------|---------|-----------|-----------|-----------|-----------|----|------------------------------------------------------------------------------------------------------------------------------------------------------------------------------------------|
| Biological Process | GO:0002260 | lymphocyte homeostasis                                          | 11/2279 | 62/18866  | 0.1224237 | 0.4332022 | 0.3919767 | 11 | LAT/TNFAIP3/TNFSF13B/RIPK3/ZC3H8/BCL10/SPTA1/DOCK10/BCL2/MEF2C/FADD                                                                                                                      |
| Biological Process | GO:0032233 | positive regulation of actin filament bundle assembly           | 11/2279 | 62/18866  | 0.1224237 | 0.4332022 | 0.3919767 | 11 | ARHGEF10/ITGB1BP1/SMAD3/SH3PXD2B/SYNPO2L/PXN/WNT11/PFN1/ARHGEF10L/ARHGEF15/SYNPO                                                                                                         |
| Biological Process | GO:0060997 | dendritic spine morphogenesis                                   | 11/2279 | 62/18866  | 0.1224237 | 0.4332022 | 0.3919767 | 11 | EPHB3/BAIAP2/WASL/SIPA1L1/DOCK10/DNM3/DNM1L/SHANK2/UBE3A/CUX2/DBNL                                                                                                                       |
| Biological Process | GO:1900046 | regulation of hemostasis                                        | 14/2279 | 83/18866  | 0.1226972 | 0.4334584 | 0.3922085 | 14 | PLAU/CD9/PRKCA/UBASH3B/SERPINB2/THBS1/F12/BLK/PDGFB/NFE2L2/CPB2/F2R/ANO6/ADTRP                                                                                                           |
| Biological Process | GO:0010675 | regulation of cellular carbohydrate metabolic process           | 23/2279 | 148/18866 | 0.1227242 | 0.4334584 | 0.3922085 | 23 | MAEA/FOXK1/HDAC4/C1QTNF3/GPLD1/CBFA2T3/PGP/PGAM1/P2RY6/HRH1/DGKQ/DYRK2/GNB3/ACACB/PPP1CB/ESRRB/PRKCE/FOXO1/NCOA2/SOGA1/PRKN/SDHAF3/RUBCNL                                                |
| Biological Process | GO:0061337 | cardiac conduction                                              | 23/2279 | 148/18866 | 0.1227242 | 0.4334584 | 0.3922085 | 23 | PDE4D/KCNE1/CASQ2/ITPR2/FXYD2/CACNA1C/CACNA2D4/FXYD1/SLC8A1/GJA5/ATP2B2/ITPR1/JUP/BIN1/KCNIP1/KCNK6/ATP2A3/KCNQ1/NPPC/ANK2/ASPH/CASQ1/SPTBN4                                             |
| Biological Process | GO:0071901 | negative regulation of protein serine/threonine kinase activity | 23/2279 | 148/18866 | 0.1227242 | 0.4334584 | 0.3922085 | 23 | RPTOR/SPRED2/PRKAG2/SORL1/HIPK3/PRKAR1B/DUSP14/SLC8A1/LAX1/TNFAIP3/FBXO7/PTPN6/MIR24-2/LATS2/PTPRJ/NF1/PPP2R1A/RGS3/RB1/DUSP3/HHEX/HEXIM1/DTNBP1                                         |
| Biological Process | GO:1903670 | regulation of sprouting angiogenesis                            | 23/2279 | 148/18866 | 0.1227242 | 0.4334584 | 0.3922085 | 23 | IL10/MAP3K3/HDAC7/ITGB1BP1/MIR199A1/MIR101-2/THBS1/DLL1/AKT3/MIR24-2/MIR27A/MIR23A/JAK1/EPN2/BMPER/GHRL/MIR138-2/PKM/MIR199A2/NOTCH1/AGTR1/PPP1R16B/CEMIP2                               |
| Biological Process | GO:1901888 | regulation of cell junction assembly                            | 30/2279 | 200/18866 | 0.123579  | 0.4363153 | 0.3947936 | 30 | RUNX1/ITGB1BP1/RAP1B/SMAD3/COLQ/TNF/EPHB3/DUSP22/SEMA4A/THBS1/APP/PRKCH/PTPRJ/SEMA4D/RAPGEF2/NRXN1/GHRL/ACTG1/NTRK1/CORO1C/MEF2C/DUSP3/MYO1C/FLOT1/SLIT1/CUX2/EIF4G1/DAPK3/NPHP4/NECTIN1 |

|                    |            |                                                                          |         |           |           |           |           |    |                                                                                                                                                                                                                                                                                                    |
|--------------------|------------|--------------------------------------------------------------------------|---------|-----------|-----------|-----------|-----------|----|----------------------------------------------------------------------------------------------------------------------------------------------------------------------------------------------------------------------------------------------------------------------------------------------------|
| Biological Process | GO:0051153 | regulation of striated muscle cell differentiation                       | 19/2279 | 119/18866 | 0.1240765 | 0.437909  | 0.3962356 | 19 | HDAC4/EHD1/CTDP1/AKAP13/MAML1/MIR199A1/NFATC2/DLL1/RBPJ/TGFB1/ARRB2/ANKRD2/BCL2/MIR199A2/NOTCH1/MEF2C/FLOT1/SCGB3A1/CEACAM5                                                                                                                                                                        |
| Biological Process | GO:0009581 | detection of external stimulus                                           | 22/2279 | 141/18866 | 0.1249684 | 0.440893  | 0.3989357 | 22 | RCVRN/PDE6A/TTN/CACNA2D4/CRB1/ARRB1/DRGX/PKD1L1/JUP/PITPNM1/CCDC66/GNAT2/SCN1A/WDR47/GNA11/ARRB2/NTRK1/TRPM3/GRK7/TMC1/EYS/CABP4                                                                                                                                                                   |
| Biological Process | GO:0070997 | neuron death                                                             | 51/2279 | 360/18866 | 0.127163  | 0.4484691 | 0.4057908 | 51 | HDAC4/CTSZ/SORL1/SSH1/IL10/CREB1/MYB/ANGPT1/TNFRSF1B/SRPK2/ARRB1/TNF/TRAF2/CCL5/FBXO7/HIPK2/ITSN1/UNC5B/APP/HLA-F/ILK/CLU/TNFRSF21/SYNGAP1/ZNF746/NF1/CSF3/GRN/PRKCI/ARRB2/ITGB2/RILPL1/NTRK1/FIS1/RB1/BCL2/MEF2C/F2R/ATN1/TP53BP2/CEBPB/BCL2L1/TYRO3/CRLF1/BAG5/NTF4/CX3CR1/NAE1/EIF4G1/FADD/PRKN |
| Biological Process | GO:0046621 | negative regulation of organ growth                                      | 8/2279  | 42/18866  | 0.1272385 | 0.4485688 | 0.4058809 | 8  | CTDP1/MIR199A1/VGLL4/TGFBR2/RIPK1/STK3/MEIS1/MIR199A2                                                                                                                                                                                                                                              |
| Biological Process | GO:0030307 | positive regulation of cell growth                                       | 26/2279 | 171/18866 | 0.1281848 | 0.4517374 | 0.408748  | 26 | S100A8/RPTOR/CPNE6/RPS6KA1/MFSD2A/EXOSC2/MIR199A1/CPNE5/KRT17/DISC1/SLC44A4/DERL2/ILK/SMAD7/SEMA4D/SMURF1/CDH4/BCL2/MIR199A2/SYT17/CYFIP1/TRPV2/NDEL1/EIF4G1/DBNL/PRKN                                                                                                                             |
| Biological Process | GO:0006942 | regulation of striated muscle contraction                                | 16/2279 | 98/18866  | 0.1291914 | 0.4524511 | 0.4093939 | 16 | HDAC4/PDE4D/CASQ2/CACNA1C/SLC8A1/GJA5/TNNT3/JUP/BIN1/NOS1AP/SMAD7/KCNQ1/GSTO1/ANK2/CASQ1/GRK2                                                                                                                                                                                                      |
| Biological Process | GO:0045833 | negative regulation of lipid metabolic process                           | 16/2279 | 98/18866  | 0.1291914 | 0.4524511 | 0.4093939 | 16 | GFI1/SORL1/MFSD2A/LPCAT1/GPLD1/TNF/ORMDL3/CRTC3/ACACB/PDGFB/MIR138-2/PDE3B/WBTC1/ACADVL/BCL2/PRKAA1                                                                                                                                                                                                |
| Biological Process | GO:0031099 | regeneration                                                             | 30/2279 | 201/18866 | 0.1292908 | 0.4524511 | 0.4093939 | 30 | IL10/CD9/PPARG/GSN/NINJ2/ULK1/MIR199A1/TGFBR2/NINJ1/IFRD1/PAX7/KREMEN1/STK24/ENO3/CPQ/JAM3/GRN/PKM/BCL2/MIR199A2/NOTCH1/CPB2/CEBPB/DYSF/CERS2/NDEL1/INPP5F/EYS/PTPRU/LPIN1                                                                                                                         |
| Biological Process | GO:0017015 | regulation of transforming growth factor beta receptor signaling pathway | 20/2279 | 127/18866 | 0.1294259 | 0.4524511 | 0.4093939 | 20 | LRG1/LTBP1/SPRED2/SKI/SMAD3/LDLRAD4/DNM2/HIPK2/CHST11/TGFBR2/THBS1/SMAD7/TGFB1/SMURF1/TGFB11/HTRA4/CREBBP/ENG/PRDM16/HTRA3                                                                                                                                                                         |

|                    |            |                                                                   |         |           |           |           |           |    |                                                                                                                                 |
|--------------------|------------|-------------------------------------------------------------------|---------|-----------|-----------|-----------|-----------|----|---------------------------------------------------------------------------------------------------------------------------------|
| Biological Process | GO:0030326 | embryonic limb morphogenesis                                      | 20/2279 | 127/18866 | 0.1294259 | 0.4524511 | 0.4093939 | 20 | CACNA1C/SKI/GJA5/CHST11/ZBTB16/HDAC1/FGFR1/RDH10/RARG/GRHL2/RUNX2/IFT140/CREBBP/HOXA9/NOTCH1/ALX3/GNA12/ALDH1A2/MAP3K20/CPLANE1 |
| Biological Process | GO:0035113 | embryonic appendage morphogenesis                                 | 20/2279 | 127/18866 | 0.1294259 | 0.4524511 | 0.4093939 | 20 | CACNA1C/SKI/GJA5/CHST11/ZBTB16/HDAC1/FGFR1/RDH10/RARG/GRHL2/RUNX2/IFT140/CREBBP/HOXA9/NOTCH1/ALX3/GNA12/ALDH1A2/MAP3K20/CPLANE1 |
| Biological Process | GO:0051053 | negative regulation of DNA metabolic process                      | 20/2279 | 127/18866 | 0.1294259 | 0.4524511 | 0.4093939 | 20 | BLM/PPARG/TNKS/RMI2/PAM16/RTEL1/RECQL5/OTUB2/SMG6/OTUB1/TP53BP1/SUB1/NPPC/TRIP12/ERCC1/ANKRD1/SLX4/TFIP11/CYREN/FBH1            |
| Biological Process | GO:0001782 | B cell homeostasis                                                | 6/2279  | 29/18866  | 0.129435  | 0.4524511 | 0.4093939 | 6  | TNFAIP3/TNFSF13B/BCL10/DOCK10/BCL2/MEF2C                                                                                        |
| Biological Process | GO:0002230 | positive regulation of defense response to virus by host          | 6/2279  | 29/18866  | 0.129435  | 0.4524511 | 0.4093939 | 6  | IL27/AIM2/ZDHHC1/TRAF3IP2/PARP9/STING1                                                                                          |
| Biological Process | GO:0006517 | protein deglycosylation                                           | 6/2279  | 29/18866  | 0.129435  | 0.4524511 | 0.4093939 | 6  | AMFR/EDEM1/DERL2/EDEM2/MAN1C1/MARCH6                                                                                            |
| Biological Process | GO:0010882 | regulation of cardiac muscle contraction by calcium ion signaling | 6/2279  | 29/18866  | 0.129435  | 0.4524511 | 0.4093939 | 6  | HDAC4/CASQ2/CACNA1C/SLC8A1/GSTO1/ANK2                                                                                           |
| Biological Process | GO:0030970 | retrograde protein transport, ER to cytosol                       | 6/2279  | 29/18866  | 0.129435  | 0.4524511 | 0.4093939 | 6  | UBAC2/EDEM1/HM13/DERL2/EDEM2/SVIP                                                                                               |
| Biological Process | GO:0031063 | regulation of histone deacetylation                               | 6/2279  | 29/18866  | 0.129435  | 0.4524511 | 0.4093939 | 6  | SKI/C6orf89/SPHK2/ZBTB7B/CTBP1/SREBF1                                                                                           |

|                    |            |                                                            |        |          |          |           |           |   |                                          |
|--------------------|------------|------------------------------------------------------------|--------|----------|----------|-----------|-----------|---|------------------------------------------|
| Biological Process | GO:0043153 | entrainment of circadian clock by photoperiod              | 6/2279 | 29/18866 | 0.129435 | 0.4524511 | 0.4093939 | 6 | MTA1/PPP1CB/PER2/PER1/FBXL6/USP2         |
| Biological Process | GO:0045577 | regulation of B cell differentiation                       | 6/2279 | 29/18866 | 0.129435 | 0.4524511 | 0.4093939 | 6 | INPP5D/TLR9/PTPN6/CYLD/INHBA/PCID2       |
| Biological Process | GO:0048679 | regulation of axon regeneration                            | 6/2279 | 29/18866 | 0.129435 | 0.4524511 | 0.4093939 | 6 | KREMEN1/STK24/GRN/CERS2/NDEL1/INPP5F     |
| Biological Process | GO:0050820 | positive regulation of coagulation                         | 6/2279 | 29/18866 | 0.129435 | 0.4524511 | 0.4093939 | 6 | THBS1/F12/NFE2L2/CPB2/F2R/ANO6           |
| Biological Process | GO:0050855 | regulation of B cell receptor signaling pathway            | 6/2279 | 29/18866 | 0.129435 | 0.4524511 | 0.4093939 | 6 | FOXP1/RUNX1/PRKCH/PRKCB/BLK/ELF1         |
| Biological Process | GO:0050901 | leukocyte tethering or rolling                             | 6/2279 | 29/18866 | 0.129435 | 0.4524511 | 0.4093939 | 6 | ELANE/FUT4/FUT7/CCR2/TNF/CX3CR1          |
| Biological Process | GO:0051569 | regulation of histone H3-K4 methylation                    | 6/2279 | 29/18866 | 0.129435 | 0.4524511 | 0.4093939 | 6 | GFI1/MYB/ZNF335/DNMT1/PIH1D1/PAXIP1      |
| Biological Process | GO:1903513 | endoplasmic reticulum to cytosol transport                 | 6/2279 | 29/18866 | 0.129435 | 0.4524511 | 0.4093939 | 6 | UBAC2/EDEM1/HM13/DERL2/EDEM2/SVIP        |
| Biological Process | GO:2000727 | positive regulation of cardiac muscle cell differentiation | 6/2279 | 29/18866 | 0.129435 | 0.4524511 | 0.4093939 | 6 | MIR199A1/RBPJ/TGFB1/ARRB2/MIR199A2/MEF2C |

|                    |            |                                                         |         |          |           |           |           |    |                                                                                           |
|--------------------|------------|---------------------------------------------------------|---------|----------|-----------|-----------|-----------|----|-------------------------------------------------------------------------------------------|
| Biological Process | GO:0002448 | mast cell mediated immunity                             | 9/2279  | 49/18866 | 0.1304528 | 0.4550044 | 0.4117041 | 9  | LAT/PIK3CD/GAB2/FGR/CD84/SPON2/SPHK2/FER/BLK                                              |
| Biological Process | GO:0002686 | negative regulation of leukocyte migration              | 9/2279  | 49/18866 | 0.1304528 | 0.4550044 | 0.4117041 | 9  | ABR/PADI2/C5AR2/MIR24-2/MIA3/WASL/BCR/PLCB1/ADTRP                                         |
| Biological Process | GO:0042398 | cellular modified amino acid biosynthetic process       | 9/2279  | 49/18866 | 0.1304528 | 0.4550044 | 0.4117041 | 9  | GGT1/MTHFD1L/CNDP2/MTHFS/ACADM/MGST2/NFE2L2/MTHFD1/PTDSS2                                 |
| Biological Process | GO:0070231 | T cell apoptotic process                                | 9/2279  | 49/18866 | 0.1304528 | 0.4550044 | 0.4117041 | 9  | CCL5/RIPK1/PTCRA/DOCK8/RIPK3/ZC3H8/BCL10/FADD/GIMAP8                                      |
| Biological Process | GO:0090199 | regulation of release of cytochrome c from mitochondria | 9/2279  | 49/18866 | 0.1304528 | 0.4550044 | 0.4117041 | 9  | PAM16/BMF/CLU/CIDEB/NOL3/ARRB2/DNM1L/BCL2L1/PRKN                                          |
| Biological Process | GO:2000107 | negative regulation of leukocyte apoptotic process      | 9/2279  | 49/18866 | 0.1304528 | 0.4550044 | 0.4117041 | 9  | FOXP1/ITPKB/CCL5/HSH2D/PTCRA/DOCK8/BCL10/NOD2/FADD                                        |
| Biological Process | GO:0030901 | midbrain development                                    | 15/2279 | 91/18866 | 0.1306003 | 0.4550179 | 0.4117164 | 15 | CSNK1D/YWHAH/PHOX2A/PADI2/NDST1/MBP/FGFR1/CSNK1E/SYNGR3/KDM7A/YWHAQ/SYPL2/HES3/OTX2/NDRG2 |
| Biological Process | GO:0045682 | regulation of epidermis development                     | 15/2279 | 91/18866 | 0.1306003 | 0.4550179 | 0.4117164 | 15 | RUNX1/VDR/TNF/KRT17/DLL1/CDH3/PRKCH/GRHL2/NUMA1/KLF7/SGPP1/NOTCH1/AQP3/ZBED2/MACROH2A2    |
| Biological Process | GO:0060333 | interferon-gamma-mediated signaling pathway             | 15/2279 | 91/18866 | 0.1306003 | 0.4550179 | 0.4117164 | 15 | IRF8/TRIM38/PPARG/IRF5/TRIM8/HLA-C/HLA-F/JAK1/TRIM5/NR1H2/NLRC5/SP100/IRF2/PARP9/TRIM26   |

|                    |            |                                                              |         |           |           |           |           |    |                                                                                                                                                                                                                                                                                                                                                          |
|--------------------|------------|--------------------------------------------------------------|---------|-----------|-----------|-----------|-----------|----|----------------------------------------------------------------------------------------------------------------------------------------------------------------------------------------------------------------------------------------------------------------------------------------------------------------------------------------------------------|
| Biological Process | GO:0048469 | cell maturation                                              | 27/2279 | 179/18866 | 0.1317137 | 0.4587287 | 0.415074  | 27 | MAEA/PPARG/BRCA2/LGI4/SLFN14/BCL11A/RFX3/BRD1/APP/FGFR1/DEFB1/RUNX2/PPP2R1A/FEV/RB1/POU2F2/BCL2/DMC1/EPAS1/NPPC/FAM20C/EPB42/CLN5/SPTBN4/ERCC2/GLDN/ANGPTL8                                                                                                                                                                                              |
| Biological Process | GO:0002712 | regulation of B cell mediated immunity                       | 10/2279 | 56/18866  | 0.132255  | 0.4599395 | 0.4161696 | 10 | IL10/TNF/CD226/PTPN6/TGFB1/PTPRC/TP53BP1/TNFSF13/PAXIP1/NSD2                                                                                                                                                                                                                                                                                             |
| Biological Process | GO:0002889 | regulation of immunoglobulin mediated immune response        | 10/2279 | 56/18866  | 0.132255  | 0.4599395 | 0.4161696 | 10 | IL10/TNF/CD226/PTPN6/TGFB1/PTPRC/TP53BP1/TNFSF13/PAXIP1/NSD2                                                                                                                                                                                                                                                                                             |
| Biological Process | GO:0016447 | somatic recombination of immunoglobulin gene segments        | 10/2279 | 56/18866  | 0.132255  | 0.4599395 | 0.4161696 | 10 | IL10/UNG/TGFB1/PTPRC/TCF3/TP53BP1/ERCC1/TNFSF13/PAXIP1/NSD2                                                                                                                                                                                                                                                                                              |
| Biological Process | GO:0086002 | cardiac muscle cell action potential involved in contraction | 10/2279 | 56/18866  | 0.132255  | 0.4599395 | 0.4161696 | 10 | KCNE1/CACNA1C/GJA5/JUP/BIN1/NOS1AP/SCN1A/SNTA1/KCNQ1/ANK2                                                                                                                                                                                                                                                                                                |
| Biological Process | GO:0003143 | embryonic heart tube morphogenesis                           | 12/2279 | 70/18866  | 0.1331226 | 0.4626182 | 0.4185934 | 12 | SMAD3/SUFU/MICAL2/TGFBR2/DLL1/MIB1/ENG/NOTCH1/MEF2C/TMED2/TEAD2/NODAL                                                                                                                                                                                                                                                                                    |
| Biological Process | GO:0043967 | histone H4 acetylation                                       | 12/2279 | 70/18866  | 0.1331226 | 0.4626182 | 0.4185934 | 12 | BRCA2/KANSL1/ARRB1/EPC1/KANSL2/CTBP1/NCOA1/PER1/PIH1D1/RUVBL1/KAT7/ING5                                                                                                                                                                                                                                                                                  |
| Biological Process | GO:0032963 | collagen metabolic process                                   | 18/2279 | 113/18866 | 0.1337513 | 0.4646329 | 0.4204164 | 18 | PRTN3/MFAP4/PPARG/MIR145/MYB/CTSD/TNXB/TGFB1/CTSB/ENG/ARRB2/COL5A1/F2R/NPPC/PDGFRB/P3H3/VSIR/P3H1                                                                                                                                                                                                                                                        |
| Biological Process | GO:0060271 | cilium assembly                                              | 53/2279 | 377/18866 | 0.1340984 | 0.4656685 | 0.4213534 | 53 | EHD1/DCTN1/GSN/CDKL1/CSNK1D/NDE1/KIAA0586/TNPO1/DNM2/DYNC1H1/DNAJB13/RFX3/DISC1/TUBB4B/CEP135/CCDC66/ABLIM3/POC1A/ASAP1/TTC39C/CEP164/DCTN2/CLUAP1/CEP78/HTT/WWTR1/IQCG/CSNK1E/IFT140/PPP2R1A/TUBA4A/SDCCAG8/RILPL1/TTC21B/NOTCH1/STK36/RPGRIP1/AVIL/ARMC2/KIFAP3/CYLD/CDC14A/DNAI2/HYLS1/CEP72/ABLIM1/TLL1/NPHP4/TXNDC15/SEPTIN9/CFAP221/CFAP46/CPLANE1 |



|                    |            |                                                   |         |           |           |           |           |    |                                                                                                                                                                                                                                                                                                                                                                              |
|--------------------|------------|---------------------------------------------------|---------|-----------|-----------|-----------|-----------|----|------------------------------------------------------------------------------------------------------------------------------------------------------------------------------------------------------------------------------------------------------------------------------------------------------------------------------------------------------------------------------|
| Biological Process | GO:1902749 | regulation of cell cycle G2/M phase transition    | 32/2279 | 217/18866 | 0.1349563 | 0.4678207 | 0.4233007 | 32 | TRIM39/BLM/BRD4/DCTN1/FZR1/CSNK1D/FOXN3/NDE1/HUS1/DYNC1H1/TUBB4B/CEP135/APP/CDC25A/CEP164/DCTN2/CEP78/CSNK1E/PSMF1/PPP2R1A/TUBA4A/TAOK3/SDCCAG8/ZFYVE19/CLSPN/PSMB7/CEP72/NAE1/PSMD13/PAXIP1/ABRAXAS1/BABAM2                                                                                                                                                                 |
| Biological Process | GO:0034341 | response to interferon-gamma                      | 30/2279 | 202/18866 | 0.1351614 | 0.4678207 | 0.4233007 | 30 | IRF8/TRIM38/PPARG/GSN/IRF5/TRIM8/SLC11A1/MEFV/CCL5/HLA-C/VPS26B/HLA-F/JAK1/TRIM5/RAB43/ADAMTS13/NR1H2/CCL20/ACTG1/NLRC5/SP100/CASP1/MYO1C/IRF2/SYCRIP/PARP9/CCL22/DAPK3/TRIM26/SHFL                                                                                                                                                                                          |
| Biological Process | GO:0006493 | protein O-linked glycosylation                    | 17/2279 | 106/18866 | 0.1358158 | 0.4678207 | 0.4233007 | 17 | GALNT2/XXYLT1/SLC35C2/GALNT12/MUC12/GXYLT2/POMT2/MUC20/B3GNT5/ST6GAL1/ST8SIA6/ST3GAL4/TET2/GALNT9/ST3GAL2/B3GNT2/B4GAT1                                                                                                                                                                                                                                                      |
| Biological Process | GO:0061458 | reproductive system development                   | 62/2279 | 447/18866 | 0.1358921 | 0.4678207 | 0.4233007 | 62 | ARID5B/BSG/RXRA/IL10/PPARG/BRCA2/VDR/SETD2/ARRB1/SPINT2/EIF2B5/E2F7/CSDE1/HSD17B2/RBPJ/PTPN6/FANCA/RDH10/RARA/SF1/SP3/DNAJB6/DAZAP1/GHRL/RARG/BMPR1B/STK3/GRHL2/ASB1/NCOA1/PDGFB/CTSB/ARRB2/GJB3/VASH1/NTRK1/HOXA9/RAD21L1/BCL2/DMC1/NOTCH1/TPPP3/EPAS1/SLIT3/GGNBP2/STOX2/UBE3A/TMED2/CEBPB/PCDH12/PDGFRB/ERCC1/CRIP1/BCL2L1/HMGCS1/TYRO3/NCOA4/PLCD3/INHBA/NODAL/LIF/ETNK2 |
| Biological Process | GO:0003283 | atrial septum development                         | 5/2279  | 23/18866  | 0.136175  | 0.4678207 | 0.4233007 | 5  | ZFPM1/GJA5/WNT11/ANK2/NSD2                                                                                                                                                                                                                                                                                                                                                   |
| Biological Process | GO:0006359 | regulation of transcription by RNA polymerase III | 5/2279  | 23/18866  | 0.136175  | 0.4678207 | 0.4233007 | 5  | RPTOR/ZC3H8/BRF1/CHD8/ZNF76                                                                                                                                                                                                                                                                                                                                                  |
| Biological Process | GO:0006582 | melanin metabolic process                         | 5/2279  | 23/18866  | 0.136175  | 0.4678207 | 0.4233007 | 5  | ZEB2/CDH3/RAPGEF2/MYO5A/BCL2                                                                                                                                                                                                                                                                                                                                                 |
| Biological Process | GO:0006783 | heme biosynthetic process                         | 5/2279  | 23/18866  | 0.136175  | 0.4678207 | 0.4233007 | 5  | SLC11A2/FECH/ALAS1/PPOX/TMEM14C                                                                                                                                                                                                                                                                                                                                              |
| Biological Process | GO:0009226 | nucleotide-sugar biosynthetic process             | 5/2279  | 23/18866  | 0.136175  | 0.4678207 | 0.4233007 | 5  | NAGK/AMDHD2/UXS1/PMM2/GFPT2                                                                                                                                                                                                                                                                                                                                                  |

|                    |            |                                                                                  |        |          |          |           |           |   |                                      |
|--------------------|------------|----------------------------------------------------------------------------------|--------|----------|----------|-----------|-----------|---|--------------------------------------|
| Biological Process | GO:0016048 | detection of temperature stimulus                                                | 5/2279 | 23/18866 | 0.136175 | 0.4678207 | 0.4233007 | 5 | DRGX/WDR47/ARRB2/NTRK1/TRPM3         |
| Biological Process | GO:0016578 | histone deubiquitination                                                         | 5/2279 | 23/18866 | 0.136175 | 0.4678207 | 0.4233007 | 5 | USP3/USP36/TAF10/ENY2/USP49          |
| Biological Process | GO:0018230 | peptidyl-L-cysteine S-palmitoylation                                             | 5/2279 | 23/18866 | 0.136175 | 0.4678207 | 0.4233007 | 5 | ZDHHC18/ZDHHC14/ZDHHC2/ZDHHC7/ZDHHC1 |
| Biological Process | GO:0018231 | peptidyl-S-diacylglycerol-L-cysteine biosynthetic process from peptidyl-cysteine | 5/2279 | 23/18866 | 0.136175 | 0.4678207 | 0.4233007 | 5 | ZDHHC18/ZDHHC14/ZDHHC2/ZDHHC7/ZDHHC1 |
| Biological Process | GO:0031281 | positive regulation of cyclase activity                                          | 5/2279 | 23/18866 | 0.136175 | 0.4678207 | 0.4233007 | 5 | RCVRN/TIMP2/CACNA1C/AKAP5/NF1        |
| Biological Process | GO:0035561 | regulation of chromatin binding                                                  | 5/2279 | 23/18866 | 0.136175 | 0.4678207 | 0.4233007 | 5 | HMBOX1/CTBP2/MED25/PARP9/FBH1        |
| Biological Process | GO:0036119 | response to platelet-derived growth factor                                       | 5/2279 | 23/18866 | 0.136175 | 0.4678207 | 0.4233007 | 5 | CREB1/FER/PDGFD/PDGFRB/MARS1         |
| Biological Process | GO:0051043 | regulation of membrane protein ectodomain proteolysis                            | 5/2279 | 23/18866 | 0.136175 | 0.4678207 | 0.4233007 | 5 | TIMP2/IL10/TNFRSF1B/GPLD1/TNF        |
| Biological Process | GO:0060149 | negative regulation of posttranscriptional gene silencing                        | 5/2279 | 23/18866 | 0.136175 | 0.4678207 | 0.4233007 | 5 | PPARG/NCOR2/TNF/TGFB1/RMRP           |

|                    |            |                                                                                                                         |        |          |          |           |           |   |                                       |
|--------------------|------------|-------------------------------------------------------------------------------------------------------------------------|--------|----------|----------|-----------|-----------|---|---------------------------------------|
| Biological Process | GO:0060547 | negative regulation of necrotic cell death                                                                              | 5/2279 | 23/18866 | 0.136175 | 0.4678207 | 0.4233007 | 5 | MIR101-2/RIPK1/ARHGEF2/FADD/PELI1     |
| Biological Process | GO:0060967 | negative regulation of gene silencing by RNA                                                                            | 5/2279 | 23/18866 | 0.136175 | 0.4678207 | 0.4233007 | 5 | PPARG/NCOR2/TNF/TGFB1/RMRP            |
| Biological Process | GO:0070584 | mitochondrion morphogenesis                                                                                             | 5/2279 | 23/18866 | 0.136175 | 0.4678207 | 0.4233007 | 5 | OPA3/IMMT/FIS1/DNM1L/BCL2L1           |
| Biological Process | GO:0070977 | bone maturation                                                                                                         | 5/2279 | 23/18866 | 0.136175 | 0.4678207 | 0.4233007 | 5 | XYLT1/SEMA4D/LTF/ANO6/RFLNA           |
| Biological Process | GO:0072215 | regulation of metanephros development                                                                                   | 5/2279 | 23/18866 | 0.136175 | 0.4678207 | 0.4233007 | 5 | PAX2/WWTR1/PDGFB/PDGFRB/LIF           |
| Biological Process | GO:1901522 | positive regulation of transcription from RNA polymerase II promoter involved in cellular response to chemical stimulus | 5/2279 | 23/18866 | 0.136175 | 0.4678207 | 0.4233007 | 5 | RBPI/RUNX2/NFE2L2/NOTCH1/RELA         |
| Biological Process | GO:1902254 | negative regulation of intrinsic apoptotic signaling pathway by p53 class mediator                                      | 5/2279 | 23/18866 | 0.136175 | 0.4678207 | 0.4233007 | 5 | RRM2B/ZNF385A/BCL2/PRKN/MARCHF7       |
| Biological Process | GO:1903589 | positive regulation of blood vessel endothelial cell proliferation involved in sprouting angiogenesis                   | 5/2279 | 23/18866 | 0.136175 | 0.4678207 | 0.4233007 | 5 | MIR101-2/MIR27A/MIR23A/AGTR1/PPP1R16B |
| Biological Process | GO:1903861 | positive regulation of dendrite extension                                                                               | 5/2279 | 23/18866 | 0.136175 | 0.4678207 | 0.4233007 | 5 | CPNE6/CPNE5/SMURF1/SYT17/PRKN         |

|                    |            |                                                  |        |          |          |           |           |   |                                                      |
|--------------------|------------|--------------------------------------------------|--------|----------|----------|-----------|-----------|---|------------------------------------------------------|
| Biological Process | GO:2000810 | regulation of bicellular tight junction assembly | 5/2279 | 23/18866 | 0.136175 | 0.4678207 | 0.4233007 | 5 | RUNX1/TNF/PRKCH/MYO1C/NPHP4                          |
| Biological Process | GO:0006213 | pyrimidine nucleoside metabolic process          | 7/2279 | 36/18866 | 0.13654  | 0.4678207 | 0.4233007 | 7 | CDA/DPYS/TK2/UCK2/UPB1/DHODH/TK1                     |
| Biological Process | GO:0009595 | detection of biotic stimulus                     | 7/2279 | 36/18866 | 0.13654  | 0.4678207 | 0.4233007 | 7 | NLRC4/NLRP3/PTPRJ/CDHR2/PGLYRP1/NOD2/PGLYRP4         |
| Biological Process | GO:0033572 | transferrin transport                            | 7/2279 | 36/18866 | 0.13654  | 0.4678207 | 0.4233007 | 7 | LMTK2/DNM2/ATP6V1B2/ATP6V0B/ARHGAP1/ATP6V0C/ATP6V1C1 |
| Biological Process | GO:0033762 | response to glucagon                             | 7/2279 | 36/18866 | 0.13654  | 0.4678207 | 0.4233007 | 7 | ADCY2/CREB1/PRKAR1B/ADCY9/ABCC2/ADCY4/SREBF1         |
| Biological Process | GO:0034405 | response to fluid shear stress                   | 7/2279 | 36/18866 | 0.13654  | 0.4678207 | 0.4233007 | 7 | SMAD7/MTSS1/ABCA1/ETS1/NFE2L2/MEF2C/PDGFRB           |
| Biological Process | GO:0046633 | alpha-beta T cell proliferation                  | 7/2279 | 36/18866 | 0.13654  | 0.4678207 | 0.4233007 | 7 | CD55/CCR2/TGFBR2/ZBTB7B/PTPRC/DOCK2/VSIR             |
| Biological Process | GO:0051294 | establishment of spindle orientation             | 7/2279 | 36/18866 | 0.13654  | 0.4678207 | 0.4233007 | 7 | DCTN1/NDE1/HTT/NUMA1/ARHGEF2/FBXW11/NDEL1            |
| Biological Process | GO:0090313 | regulation of protein targeting to membrane      | 7/2279 | 36/18866 | 0.13654  | 0.4678207 | 0.4233007 | 7 | KCNE1/ITGB1BP1/ITGB2/FIS1/MYO1C/MIEF1/PDZK1          |

|                    |            |                                                  |         |           |           |           |           |    |                                                                                                                                                                                                                |
|--------------------|------------|--------------------------------------------------|---------|-----------|-----------|-----------|-----------|----|----------------------------------------------------------------------------------------------------------------------------------------------------------------------------------------------------------------|
| Biological Process | GO:0106056 | regulation of calcineurin-mediated signaling     | 7/2279  | 36/18866  | 0.13654   | 0.4678207 | 0.4233007 | 7  | TNF/CAMTA1/RCAN1/DYRK2/FHL2/CHERP/STIMATE                                                                                                                                                                      |
| Biological Process | GO:0034763 | negative regulation of transmembrane transport   | 20/2279 | 128/18866 | 0.1369103 | 0.4682883 | 0.4237239 | 20 | KCNE1/THADA/CASQ2/MIR143/TNF/TLR9/BIN1/THBS1/GRB10/SLC43A2/PRKCB/CAB39/GSTO1/PRKCE/SLC43A1/NEDD4/DYSF/HECW2/YWHAQ/CBARP                                                                                        |
| Biological Process | GO:0045732 | positive regulation of protein catabolic process | 33/2279 | 225/18866 | 0.1375835 | 0.4682883 | 0.4237239 | 33 | RNF144A/SORL1/FZR1/RNF19A/STX5/WWP2/CSNK1D/LPCAT1/TNFRSF1B/GLPD1/TNF/TNFAIP3/VGLL4/CBFA2T3/DISC1/EDEM1/CLU/SMAD7/SMURF1/AXIN1/EDEM2/CSNK1E/NFE2L2/RNF144B/NEDD4/RNF14/FOXO1/TRIB1/TNFSF12/HECW2/EZR/RNF40/PRKN |
| Biological Process | GO:0043473 | pigmentation                                     | 16/2279 | 99/18866  | 0.1377775 | 0.4682883 | 0.4237239 | 16 | SHROOM3/LYST/VANGL1/KIF13A/ZEB2/RAB27A/CDH3/DCTN2/MYO5A/NF1/GNA11/BCL2/MEF2C/HPS6/AP3D1/DTNBP1                                                                                                                 |
| Biological Process | GO:0007219 | Notch signaling pathway                          | 29/2279 | 195/18866 | 0.1382031 | 0.4682883 | 0.4237239 | 29 | MAML3/WWP2/SLC35C2/MAML1/ITGB1BP1/AAK1/TSPAN14/ARRB1/MAML2/EGFL7/TGFBR2/DLL1/APP/RBPJ/MIB1/ZMIZ1/EPN2/PERP/AGXT/CREBBP/PRKCI/TSPEAR/NOD2/NOTCH1/NOTCH4/DLK1/ZNF423/HES3/PRAG1                                  |
| Biological Process | GO:1902275 | regulation of chromatin organization             | 29/2279 | 195/18866 | 0.1382031 | 0.4682883 | 0.4237239 | 29 | GFI1/BRD4/MYB/SKI/ARRB1/C6orf89/PADI2/OTUB2/RPS6KA4/SPHK2/ZBTB7B/PAX7/CTBP1/ATF7IP/KDM4C/SETD1A/ZNF335/PHF19/OTUB1/DNMT1/PIH1D1/TRIP12/SREBF1/RNF40/KAT7/PARP10/LIF/PAXIP1/NSD3                                |
| Biological Process | GO:0003093 | regulation of glomerular filtration              | 3/2279  | 11/18866  | 0.138648  | 0.4682883 | 0.4237239 | 3  | GJA5/PDGFB/F2R                                                                                                                                                                                                 |
| Biological Process | GO:0003139 | secondary heart field specification              | 3/2279  | 11/18866  | 0.138648  | 0.4682883 | 0.4237239 | 3  | RBPJ/WNT11/MEF2C                                                                                                                                                                                               |
| Biological Process | GO:0003157 | endocardium development                          | 3/2279  | 11/18866  | 0.138648  | 0.4682883 | 0.4237239 | 3  | RBPJ/STK3/NOTCH1                                                                                                                                                                                               |

|                    |            |                                                                       |        |          |          |           |           |   |                     |
|--------------------|------------|-----------------------------------------------------------------------|--------|----------|----------|-----------|-----------|---|---------------------|
| Biological Process | GO:0003174 | mitral valve development                                              | 3/2279 | 11/18866 | 0.138648 | 0.4682883 | 0.4237239 | 3 | ZFPM1/GJA5/NOTCH1   |
| Biological Process | GO:0006048 | UDP-N-acetylglucosamine biosynthetic process                          | 3/2279 | 11/18866 | 0.138648 | 0.4682883 | 0.4237239 | 3 | NAGK/AMDHD2/GFPT2   |
| Biological Process | GO:0014870 | response to muscle inactivity                                         | 3/2279 | 11/18866 | 0.138648 | 0.4682883 | 0.4237239 | 3 | HDAC4/PKM/CASQ1     |
| Biological Process | GO:0032060 | bleb assembly                                                         | 3/2279 | 11/18866 | 0.138648 | 0.4682883 | 0.4237239 | 3 | MYLK/PMP22/ANO6     |
| Biological Process | GO:0033197 | response to vitamin E                                                 | 3/2279 | 11/18866 | 0.138648 | 0.4682883 | 0.4237239 | 3 | PPARG/CAT/HMGCS1    |
| Biological Process | GO:0035331 | negative regulation of hippo signaling                                | 3/2279 | 11/18866 | 0.138648 | 0.4682883 | 0.4237239 | 3 | MARK3/VGLL4/LIMD1   |
| Biological Process | GO:0042135 | neurotransmitter catabolic process                                    | 3/2279 | 11/18866 | 0.138648 | 0.4682883 | 0.4237239 | 3 | COLQ/COMT/HNMT      |
| Biological Process | GO:0042985 | negative regulation of amyloid precursor protein biosynthetic process | 3/2279 | 11/18866 | 0.138648 | 0.4682883 | 0.4237239 | 3 | MIR101-2/AGO2/ITM2C |
| Biological Process | GO:0043455 | regulation of secondary metabolic process                             | 3/2279 | 11/18866 | 0.138648 | 0.4682883 | 0.4237239 | 3 | ZEB2/CDH3/RAPGEF2   |

|                    |            |                                                                                             |        |          |          |           |           |   |                        |
|--------------------|------------|---------------------------------------------------------------------------------------------|--------|----------|----------|-----------|-----------|---|------------------------|
| Biological Process | GO:0043619 | regulation of transcription from RNA polymerase II promoter in response to oxidative stress | 3/2279 | 11/18866 | 0.138648 | 0.4682883 | 0.4237239 | 3 | NFE2L2/ANKRD2/EPAS1    |
| Biological Process | GO:0046501 | protoporphyrinogen IX metabolic process                                                     | 3/2279 | 11/18866 | 0.138648 | 0.4682883 | 0.4237239 | 3 | FECH/ALAS1/PPOX        |
| Biological Process | GO:0048021 | regulation of melanin biosynthetic process                                                  | 3/2279 | 11/18866 | 0.138648 | 0.4682883 | 0.4237239 | 3 | ZEB2/CDH3/RAPGEF2      |
| Biological Process | GO:0048103 | somatic stem cell division                                                                  | 3/2279 | 11/18866 | 0.138648 | 0.4682883 | 0.4237239 | 3 | MIR145/LBH/NOTCH1      |
| Biological Process | GO:0051006 | positive regulation of lipoprotein lipase activity                                          | 3/2279 | 11/18866 | 0.138648 | 0.4682883 | 0.4237239 | 3 | NR1H2/LMF1/ABHD5       |
| Biological Process | GO:0051573 | negative regulation of histone H3-K9 methylation                                            | 3/2279 | 11/18866 | 0.138648 | 0.4682883 | 0.4237239 | 3 | KDM4C/DNMT1/PIH1D1     |
| Biological Process | GO:0051673 | membrane disruption in other organism                                                       | 3/2279 | 11/18866 | 0.138648 | 0.4682883 | 0.4237239 | 3 | DEFA4/MPEG1/LTF        |
| Biological Process | GO:0060354 | negative regulation of cell adhesion molecule production                                    | 3/2279 | 11/18866 | 0.138648 | 0.4682883 | 0.4237239 | 3 | MIR101-2/NOTCH1/NOTCH4 |
| Biological Process | GO:0070106 | interleukin-27-mediated signaling pathway                                                   | 3/2279 | 11/18866 | 0.138648 | 0.4682883 | 0.4237239 | 3 | IL27/JAK1/CRLF1        |

|                    |            |                                                                                              |        |          |          |           |           |   |                      |
|--------------------|------------|----------------------------------------------------------------------------------------------|--------|----------|----------|-----------|-----------|---|----------------------|
| Biological Process | GO:0070673 | response to interleukin-18                                                                   | 3/2279 | 11/18866 | 0.138648 | 0.4682883 | 0.4237239 | 3 | PDGFB/IL18RAP/IL18R1 |
| Biological Process | GO:0086023 | adenylate cyclase-activating adrenergic receptor signaling pathway involved in heart process | 3/2279 | 11/18866 | 0.138648 | 0.4682883 | 0.4237239 | 3 | PDE4D/AKAP13/GNAI2   |
| Biological Process | GO:0090269 | fibroblast growth factor production                                                          | 3/2279 | 11/18866 | 0.138648 | 0.4682883 | 0.4237239 | 3 | CCM2L/WNT11/FGFR1    |
| Biological Process | GO:0090270 | regulation of fibroblast growth factor production                                            | 3/2279 | 11/18866 | 0.138648 | 0.4682883 | 0.4237239 | 3 | CCM2L/WNT11/FGFR1    |
| Biological Process | GO:0090657 | telomeric loop disassembly                                                                   | 3/2279 | 11/18866 | 0.138648 | 0.4682883 | 0.4237239 | 3 | BLM/RTEL1/SLX4       |
| Biological Process | GO:0140052 | cellular response to oxidised low-density lipoprotein particle stimulus                      | 3/2279 | 11/18866 | 0.138648 | 0.4682883 | 0.4237239 | 3 | MIA3/CD68/ADTRP      |
| Biological Process | GO:1900376 | regulation of secondary metabolite biosynthetic process                                      | 3/2279 | 11/18866 | 0.138648 | 0.4682883 | 0.4237239 | 3 | ZEB2/CDH3/RAPGEF2    |
| Biological Process | GO:1901033 | positive regulation of response to reactive oxygen species                                   | 3/2279 | 11/18866 | 0.138648 | 0.4682883 | 0.4237239 | 3 | TNF/RIPK1/SIRT3      |
| Biological Process | GO:1901526 | positive regulation of mitophagy                                                             | 3/2279 | 11/18866 | 0.138648 | 0.4682883 | 0.4237239 | 3 | VPS13D/SMURF1/PRKN   |



|                    |            |                                                         |         |           |           |           |           |    |                                                                                                                                                                                                               |
|--------------------|------------|---------------------------------------------------------|---------|-----------|-----------|-----------|-----------|----|---------------------------------------------------------------------------------------------------------------------------------------------------------------------------------------------------------------|
| Biological Process | GO:1902065 | response to L-glutamate                                 | 3/2279  | 11/18866  | 0.138648  | 0.4682883 | 0.4237239 | 3  | CREB1/BCL11A/BAIAP2                                                                                                                                                                                           |
| Biological Process | GO:1905245 | regulation of aspartic-type peptidase activity          | 3/2279  | 11/18866  | 0.138648  | 0.4682883 | 0.4237239 | 3  | SORL1/BIN1/GRN                                                                                                                                                                                                |
| Biological Process | GO:2000035 | regulation of stem cell division                        | 3/2279  | 11/18866  | 0.138648  | 0.4682883 | 0.4237239 | 3  | MIR145/LBH/ESRRB                                                                                                                                                                                              |
| Biological Process | GO:2000317 | negative regulation of T-helper 17 type immune response | 3/2279  | 11/18866  | 0.138648  | 0.4682883 | 0.4237239 | 3  | LOXL3/SMAD7/ZBTB7B                                                                                                                                                                                            |
| Biological Process | GO:2000574 | regulation of microtubule motor activity                | 3/2279  | 11/18866  | 0.138648  | 0.4682883 | 0.4237239 | 3  | NDE1/FBXW11/NDEL1                                                                                                                                                                                             |
| Biological Process | GO:1905897 | regulation of response to endoplasmic reticulum stress  | 15/2279 | 92/18866  | 0.1395981 | 0.4691931 | 0.4245426 | 15 | ERN1/PIK3R1/NCK2/UBAC2/EDEM1/DERL2/CLU/COP55/NR1H2/EDEM2/NFE2L2/BCL2L1/GRINA/SVIP/PRKN                                                                                                                        |
| Biological Process | GO:0009743 | response to carbohydrate                                | 34/2279 | 233/18866 | 0.140085  | 0.4691931 | 0.4245426 | 34 | NADK/SLC2A5/MAP2K6/LRP5L/ERN1/RAP1B/SLC8A1/ARRB1/GPLD1/EIF2B5/TGFBR2/THBS1/COLEC12/TCF7L2/IGF1R/PTPRN2/PAX2/ENY2/PRKCB/GIPR/GHRL/CAT/KLF7/FIS1/PIH1D1/PRKCE/CPB2/PCK2/ERCC1/SREBF1/SLC29A1/KAT7/C2CD2L/PRKAA1 |
| Biological Process | GO:2001234 | negative regulation of apoptotic signaling pathway      | 34/2279 | 233/18866 | 0.140085  | 0.4691931 | 0.4245426 | 34 | ENO1/ITPRIP/URI1/PAM16/CTTN/TNF/TRAF2/TNFAIP3/UNC5B/THBS1/RRM2B/RIPK1/GNAI2/ZNF385A/TCF7L2/CLU/HDAC1/HTT/NOL3/MAPK8IP2/NFE2L2/ARRB2/RB1/BCL2/PIH1D1/ARHGEF2/BCL2L1/RELA/BAG5/GRINA/CX3CR1/FADD/PRKN/MARCHF7   |
| Biological Process | GO:0007519 | skeletal muscle tissue development                      | 24/2279 | 158/18866 | 0.1403576 | 0.4691931 | 0.4245426 | 24 | HDAC4/MEF2D/SKI/MYH15/DLL1/PAX7/TGFB1/IGSF8/VAMP5/SVIL/NF1/ARNTL/MYOM1/ANKRD2/RB1/BCL2/NOTCH1/MEF2C/HLX/ANKRD1/FLOT1/CASQ1/PRKAA1/MYORG                                                                       |

|                    |            |                                                                                |        |          |           |           |           |   |                                   |
|--------------------|------------|--------------------------------------------------------------------------------|--------|----------|-----------|-----------|-----------|---|-----------------------------------|
| Biological Process | GO:0000097 | sulfur amino acid biosynthetic process                                         | 4/2279 | 17/18866 | 0.1406689 | 0.4691931 | 0.4245426 | 4 | GGT1/CBS/MTHFD1/ADI1              |
| Biological Process | GO:0002031 | G protein-coupled receptor internalization                                     | 4/2279 | 17/18866 | 0.1406689 | 0.4691931 | 0.4245426 | 4 | ARRB1/DNM2/ARRB2/DNM1             |
| Biological Process | GO:0003198 | epithelial to mesenchymal transition involved in endocardial cushion formation | 4/2279 | 17/18866 | 0.1406689 | 0.4691931 | 0.4245426 | 4 | TGFBR2/RBPJ/ENG/NOTCH1            |
| Biological Process | GO:0006750 | glutathione biosynthetic process                                               | 4/2279 | 17/18866 | 0.1406689 | 0.4691931 | 0.4245426 | 4 | GGT1/CNDP2/MGST2/NFE2L2           |
| Biological Process | GO:0006896 | Golgi to vacuole transport                                                     | 4/2279 | 17/18866 | 0.1406689 | 0.4691931 | 0.4245426 | 4 | VTI1A/ANKFY1/AP1G2/AP3D1          |
| Biological Process | GO:0009312 | oligosaccharide biosynthetic process                                           | 4/2279 | 17/18866 | 0.1406689 | 0.4691931 | 0.4245426 | 4 | ST6GALNAC1/ST3GAL4/SLC2A1/ST3GAL2 |
| Biological Process | GO:0010224 | response to UV-B                                                               | 4/2279 | 17/18866 | 0.1406689 | 0.4691931 | 0.4245426 | 4 | MFAP4/BCL2/CRIP1/RELA             |
| Biological Process | GO:0015693 | magnesium ion transport                                                        | 4/2279 | 17/18866 | 0.1406689 | 0.4691931 | 0.4245426 | 4 | NIPAL3/ZDHHC17/CNNM2/SLC41A1      |
| Biological Process | GO:0016045 | detection of bacterium                                                         | 4/2279 | 17/18866 | 0.1406689 | 0.4691931 | 0.4245426 | 4 | NLRC4/PGLYRP1/NOD2/PGLYRP4        |

|                    |            |                                                      |        |          |           |           |           |   |                             |
|--------------------|------------|------------------------------------------------------|--------|----------|-----------|-----------|-----------|---|-----------------------------|
| Biological Process | GO:0021692 | cerebellar Purkinje cell layer morphogenesis         | 4/2279 | 17/18866 | 0.1406689 | 0.4691931 | 0.4245426 | 4 | DLL1/TTC21B/TLL1/COQ8B      |
| Biological Process | GO:0030575 | nuclear body organization                            | 4/2279 | 17/18866 | 0.1406689 | 0.4691931 | 0.4245426 | 4 | SRPK2/HIPK2/SF1/ETS1        |
| Biological Process | GO:0030730 | sequestering of triglyceride                         | 4/2279 | 17/18866 | 0.1406689 | 0.4691931 | 0.4245426 | 4 | PNPLA2/PPARG/TNF/ABHD5      |
| Biological Process | GO:0031065 | positive regulation of histone deacetylation         | 4/2279 | 17/18866 | 0.1406689 | 0.4691931 | 0.4245426 | 4 | C6orf89/ZBTB7B/CTBP1/SREBF1 |
| Biological Process | GO:0036065 | fucosylation                                         | 4/2279 | 17/18866 | 0.1406689 | 0.4691931 | 0.4245426 | 4 | FUT4/FUT7/SLC35C2/FUT11     |
| Biological Process | GO:0042953 | lipoprotein transport                                | 4/2279 | 17/18866 | 0.1406689 | 0.4691931 | 0.4245426 | 4 | PPARG/MIA3/PRKCB/ZDHHC17    |
| Biological Process | GO:0044546 | NLRP3 inflammasome complex assembly                  | 4/2279 | 17/18866 | 0.1406689 | 0.4691931 | 0.4245426 | 4 | AIM2/NLRP3/MEFV/STMP1       |
| Biological Process | GO:0045623 | negative regulation of T-helper cell differentiation | 4/2279 | 17/18866 | 0.1406689 | 0.4691931 | 0.4245426 | 4 | LOXL3/SMAD7/ZBTB7B/HLX      |
| Biological Process | GO:0046838 | phosphorylated carbohydrate dephosphorylation        | 4/2279 | 17/18866 | 0.1406689 | 0.4691931 | 0.4245426 | 4 | SYNJ2/INPP5A/INPP5E/IMPA2   |

|                    |            |                                                               |        |          |           |           |           |   |                            |
|--------------------|------------|---------------------------------------------------------------|--------|----------|-----------|-----------|-----------|---|----------------------------|
| Biological Process | GO:0046851 | negative regulation of bone remodeling                        | 4/2279 | 17/18866 | 0.1406689 | 0.4691931 | 0.4245426 | 4 | INPP5D/UBASH3B/TNFAIP3/CSK |
| Biological Process | GO:0051580 | regulation of neurotransmitter uptake                         | 4/2279 | 17/18866 | 0.1406689 | 0.4691931 | 0.4245426 | 4 | ITGB3/PER2/FLOT1/PRKN      |
| Biological Process | GO:0055012 | ventricular cardiac muscle cell differentiation               | 4/2279 | 17/18866 | 0.1406689 | 0.4691931 | 0.4245426 | 4 | RXRA/RARA/MEF2C/FHL2       |
| Biological Process | GO:0055070 | copper ion homeostasis                                        | 4/2279 | 17/18866 | 0.1406689 | 0.4691931 | 0.4245426 | 4 | COX19/APP/ATOX1/ATP7B      |
| Biological Process | GO:0072673 | lamellipodium morphogenesis                                   | 4/2279 | 17/18866 | 0.1406689 | 0.4691931 | 0.4245426 | 4 | RREB1/KANK1/ARHGEF7/CORO1C |
| Biological Process | GO:0090141 | positive regulation of mitochondrial fission                  | 4/2279 | 17/18866 | 0.1406689 | 0.4691931 | 0.4245426 | 4 | FIS1/DNM1L/MIEF1/PRKN      |
| Biological Process | GO:0098962 | regulation of postsynaptic neurotransmitter receptor activity | 4/2279 | 17/18866 | 0.1406689 | 0.4691931 | 0.4245426 | 4 | DLGAP4/CNIH2/BEGAIN/NPTX1  |
| Biological Process | GO:1900242 | regulation of synaptic vesicle endocytosis                    | 4/2279 | 17/18866 | 0.1406689 | 0.4691931 | 0.4245426 | 4 | DGKQ/SH3GL1/DNM1/DNM1L     |
| Biological Process | GO:1904263 | positive regulation of TORC1 signaling                        | 4/2279 | 17/18866 | 0.1406689 | 0.4691931 | 0.4245426 | 4 | CLEC16A/SIK3/SEC13/PIH1D1  |

|                    |            |                                                                       |         |           |           |           |           |    |                                                                                                                                                            |
|--------------------|------------|-----------------------------------------------------------------------|---------|-----------|-----------|-----------|-----------|----|------------------------------------------------------------------------------------------------------------------------------------------------------------|
| Biological Process | GO:0008631 | intrinsic apoptotic signaling pathway in response to oxidative stress | 8/2279  | 43/18866  | 0.1407431 | 0.4691931 | 0.4245426 | 8  | P4HB/ZNF622/STK24/NOL3/NFE2L2/BCL2/BAG5/PRKN                                                                                                               |
| Biological Process | GO:0010470 | regulation of gastrulation                                            | 8/2279  | 43/18866  | 0.1407431 | 0.4691931 | 0.4245426 | 8  | IL10/MBP/FGFR1/IL1RN/COL5A1/MYADM/NODAL/OTX2                                                                                                               |
| Biological Process | GO:0032008 | positive regulation of TOR signaling                                  | 8/2279  | 43/18866  | 0.1407431 | 0.4691931 | 0.4245426 | 8  | RPTOR/MIR199A1/RHEB/CLEC16A/SIK3/SEC13/MIR199A2/PIH1D1                                                                                                     |
| Biological Process | GO:0050850 | positive regulation of calcium-mediated signaling                     | 8/2279  | 43/18866  | 0.1407431 | 0.4691931 | 0.4245426 | 8  | TNF/CAMTA1/P2RY6/HTT/GSTO1/CHERP/P2RX5/STIMATE                                                                                                             |
| Biological Process | GO:0051154 | negative regulation of striated muscle cell differentiation           | 8/2279  | 43/18866  | 0.1407431 | 0.4691931 | 0.4245426 | 8  | HDAC4/CTDP1/MIR199A1/DLL1/ANKRD2/MIR199A2/NOTCH1/CEACAM5                                                                                                   |
| Biological Process | GO:0070296 | sarcoplasmic reticulum calcium ion transport                          | 8/2279  | 43/18866  | 0.1407431 | 0.4691931 | 0.4245426 | 8  | PDE4D/CASQ2/CACNA1C/SLC8A1/NOL3/GSTO1/ANK2/CASQ1                                                                                                           |
| Biological Process | GO:0006937 | regulation of muscle contraction                                      | 26/2279 | 173/18866 | 0.1410778 | 0.4701439 | 0.4254029 | 26 | HDAC4/PDE4D/ENO1/CASQ2/MIR143/MIR145/CACNA1C/SLC8A1/CTTN/ANXA6/GJA5/TNNT3/JUP/BIN1/NOS1AP/SMAD7/GHRL/CHRM2/KCNQ1/GSTO1/P2RX1/F2R/ANK2/CASQ1/DA<br>PK3/GRK2 |
| Biological Process | GO:0006970 | response to osmotic stress                                            | 14/2279 | 85/18866  | 0.1412271 | 0.4701468 | 0.4254055 | 14 | MYLK/MAP7/TNF/LRRC8C/MLC1/AQP1/CAB39/ARHGEF2/SLC2A1/DYSF/HNMT/ANXA7/SST/AQP9                                                                               |
| Biological Process | GO:0045844 | positive regulation of striated muscle tissue development             | 14/2279 | 85/18866  | 0.1412271 | 0.4701468 | 0.4254055 | 14 | CREB1/MIR199A1/DLL1/RBPJ/FGFR1/TGFB1/ARRB2/ARNTL/BCL2/MIR199A2/NOTCH1/MEF2C/FLOT1/PRKAA1                                                                   |

|                    |            |                                                                              |         |           |           |           |           |    |                                                                                                                                                                                    |
|--------------------|------------|------------------------------------------------------------------------------|---------|-----------|-----------|-----------|-----------|----|------------------------------------------------------------------------------------------------------------------------------------------------------------------------------------|
| Biological Process | GO:0048636 | positive regulation of muscle organ development                              | 14/2279 | 85/18866  | 0.1412271 | 0.4701468 | 0.4254055 | 14 | CREB1/MIR199A1/DLL1/RBPJ/FGFR1/TGFB1/ARRB2/ARNTL/BCL2/MIR199A2/NOTCH1/MEF2C/FLOT1/PRKAA1                                                                                           |
| Biological Process | GO:0031345 | negative regulation of cell projection organization                          | 28/2279 | 188/18866 | 0.1413221 | 0.470298  | 0.4255424 | 28 | SEMA6B/CTSZ/GFI1/TACSTD2/KANK1/YWHAH/DNM2/BCL11A/SEMA4A/RTN4/PMP22/SEMA4B/IFRD1/ASAP1/SYNGAP1/KREMEN1/SEMA4D/RAPGEF2/ITM2C/DNM3/CDKL3/UBE3A/CERS2/INPP5F/BAG5/RAP1GAP2/PRAG1/SPART |
| Biological Process | GO:0050671 | positive regulation of lymphocyte proliferation                              | 21/2279 | 136/18866 | 0.1418234 | 0.4718013 | 0.4269025 | 21 | HLA-DMB/CD55/CCR2/CCL5/NCK2/NFATC2/TNFSF13B/TLR9/TGFBR2/CCDC88B/PTPRC/CD320/SPTA1/ZNF335/PNP/BCL2/MEF2C/SLC7A1/FADD/PELI1/VAV3                                                     |
| Biological Process | GO:0098693 | regulation of synaptic vesicle cycle                                         | 18/2279 | 114/18866 | 0.1418875 | 0.4718493 | 0.426946  | 18 | PRKAR1B/RAP1B/PLD1/GIT1/APBA2/DGKQ/PRKCB/NRXN1/VPS18/CHRM2/SH3GL1/DNM1/DNM3/P2RX1/DNM1L/CYFIP1/DTNBP1/FGF14                                                                        |
| Biological Process | GO:0002711 | positive regulation of T cell mediated immunity                              | 9/2279  | 50/18866  | 0.1430482 | 0.4742153 | 0.4290868 | 9  | PRKCZ/NLRP3/IL1R1/TRAF2/HLA-F/PTPRC/IL18R1/FADD/CYRIB                                                                                                                              |
| Biological Process | GO:0003044 | regulation of systemic arterial blood pressure mediated by a chemical signal | 9/2279  | 50/18866  | 0.1430482 | 0.4742153 | 0.4290868 | 9  | CTSZ/PDE4D/CTSG/SLC2A5/GJA5/F2R/AGTR1/HSD11B2/AOPEP                                                                                                                                |
| Biological Process | GO:0010718 | positive regulation of epithelial to mesenchymal transition                  | 9/2279  | 50/18866  | 0.1430482 | 0.4742153 | 0.4290868 | 9  | SMAD3/TGFBR2/TCF7L2/TGFB1/TGFB111/WWTR1/ENG/NOTCH1/GCNT2                                                                                                                           |
| Biological Process | GO:0030195 | negative regulation of blood coagulation                                     | 9/2279  | 50/18866  | 0.1430482 | 0.4742153 | 0.4290868 | 9  | PLAU/CD9/UBASH3B/SERPINB2/THBS1/F12/PDGFB/CPB2/ADTRP                                                                                                                               |
| Biological Process | GO:0050873 | brown fat cell differentiation                                               | 9/2279  | 50/18866  | 0.1430482 | 0.4742153 | 0.4290868 | 9  | LRG1/RREB1/ZNF516/ZBTB7B/FTO/PRDM16/CEBPB/LAMB3/MB                                                                                                                                 |

|                    |            |                                                                             |         |          |           |           |           |    |                                                                         |
|--------------------|------------|-----------------------------------------------------------------------------|---------|----------|-----------|-----------|-----------|----|-------------------------------------------------------------------------|
| Biological Process | GO:0101023 | vascular endothelial cell proliferation                                     | 9/2279  | 50/18866 | 0.1430482 | 0.4742153 | 0.4290868 | 9  | PPARG/AKT3/MIR24-2/MIR27A/FLT1/FGFR1/GHRL/MEF2C/PLCG1                   |
| Biological Process | GO:1902743 | regulation of lamellipodium organization                                    | 9/2279  | 50/18866 | 0.1430482 | 0.4742153 | 0.4290868 | 9  | HDAC4/RREB1/KANK1/ARHGEF7/DNM2/FER/NCKAP1/CORO1C/AVIL                   |
| Biological Process | GO:1904707 | positive regulation of vascular associated smooth muscle cell proliferation | 9/2279  | 50/18866 | 0.1430482 | 0.4742153 | 0.4290868 | 9  | IL10/MEF2D/ERN1/TNF/GNAI2/MIR27A/P2RY6/PDGFB/DNMT1                      |
| Biological Process | GO:1905562 | regulation of vascular endothelial cell proliferation                       | 9/2279  | 50/18866 | 0.1430482 | 0.4742153 | 0.4290868 | 9  | PPARG/AKT3/MIR24-2/MIR27A/FLT1/FGFR1/GHRL/MEF2C/PLCG1                   |
| Biological Process | GO:0035690 | cellular response to drug                                                   | 12/2279 | 71/18866 | 0.1436185 | 0.4757738 | 0.4304971 | 12 | AIM2/RAP1B/GPLD1/RECQL5/DDC/CRHBP/NCOA1/KCNQ1/NFE2L2/MEF2C/CHEK2/ANKRD1 |
| Biological Process | GO:0051785 | positive regulation of nuclear division                                     | 12/2279 | 71/18866 | 0.1436185 | 0.4757738 | 0.4304971 | 12 | TGFA/NSMCE2/CUL3/CDC16/NUMA1/PDGFB/PLCB1/RB1/CDC45/ANAPC7/PDGFRB/SLF1   |
| Biological Process | GO:0001541 | ovarian follicle development                                                | 10/2279 | 57/18866 | 0.1440604 | 0.4764214 | 0.431083  | 10 | ARRB1/EIF2B5/BMPR1B/ARRB2/BCL2/DMC1/UBE3A/CEBPB/BCL2L1/INHBA            |
| Biological Process | GO:0060760 | positive regulation of response to cytokine stimulus                        | 10/2279 | 57/18866 | 0.1440604 | 0.4764214 | 0.431083  | 10 | GFI1/IL1R1/TRAF2/RIPK1/CPNE1/NLRC5/CASP1/PARP9/FADD/PRKN                |
| Biological Process | GO:0071398 | cellular response to fatty acid                                             | 10/2279 | 57/18866 | 0.1440604 | 0.4764214 | 0.431083  | 10 | PPARG/CREB1/P2RY6/SMARCD1/GNG2/ACACA/PRKCE/SREBF1/CPT1A/PRKAA1          |

|                    |            |                                                                             |         |           |           |           |           |    |                                                                                                                                                                                                                                                                                                                                        |
|--------------------|------------|-----------------------------------------------------------------------------|---------|-----------|-----------|-----------|-----------|----|----------------------------------------------------------------------------------------------------------------------------------------------------------------------------------------------------------------------------------------------------------------------------------------------------------------------------------------|
| Biological Process | GO:0000082 | G1/S transition of mitotic cell cycle                                       | 41/2279 | 287/18866 | 0.1440675 | 0.4764214 | 0.431083  | 41 | RPTOR/GFI1/BRD4/TFDP1/POLE/PRMT2/E2F3/RCC1/FBXO7/E2F7/MCM5/CUL3/POLA2/CTDSPL/PCBP4/RIPK1/PTPN6/NACC2/ZNF385A/CDK14/TAF10/LATS2/CDC25A/ARID3A/MCM2/GFI1B/PLCB1/CCNH/ESRRB/MIR138-2/CCNA1/RB1/BCL2/E2F6/CHEK2/BACH1/PLRG1/INHBA/POLE4/EIF4G1/ZNF324                                                                                      |
| Biological Process | GO:0001947 | heart looping                                                               | 11/2279 | 64/18866  | 0.144165  | 0.4764214 | 0.431083  | 11 | SMAD3/SUFU/MICAL2/TGFBR2/DLL1/MIB1/ENG/NOTCH1/MEF2C/TMED2/NODAL                                                                                                                                                                                                                                                                        |
| Biological Process | GO:0030166 | proteoglycan biosynthetic process                                           | 11/2279 | 64/18866  | 0.144165  | 0.4764214 | 0.431083  | 11 | CSGALNACT1/HS3ST3B1/DSE/CHSY1/CHST11/CHST15/NDST1/TCF7L2/XYL1/BMPR1B/PXYLP1                                                                                                                                                                                                                                                            |
| Biological Process | GO:0042130 | negative regulation of T cell proliferation                                 | 11/2279 | 64/18866  | 0.144165  | 0.4764214 | 0.431083  | 11 | IL10/MAD1L1/SFTPD/PTPN6/TNFRSF21/ZBTB7B/CEBPB/PEL1/TMEM131L/V SIR/MARCH7                                                                                                                                                                                                                                                               |
| Biological Process | GO:0051983 | regulation of chromosome segregation                                        | 17/2279 | 107/18866 | 0.1443177 | 0.4767601 | 0.4313895 | 17 | MAD1L1/TNKS/RMI2/NSMCE2/DYNC1H1/CUL3/CDC16/TACC3/NUMA1/NEK6/RB1/CDCA5/ANAPC7/SPAG5/HECW2/PCID2/SLF1                                                                                                                                                                                                                                    |
| Biological Process | GO:1903844 | regulation of cellular response to transforming growth factor beta stimulus | 20/2279 | 129/18866 | 0.1446398 | 0.4776582 | 0.4322021 | 20 | LRG1/LTBP1/SPRED2/SKI/SMAD3/LDLRAD4/DNM2/HIPK2/CHST11/TGFBR2/THBS1/SMAD7/TGFB1/SMURF1/TGFB11/HTRA4/CREBBP/ENG/PRDM16/HTRA3                                                                                                                                                                                                             |
| Biological Process | GO:0050678 | regulation of epithelial cell proliferation                                 | 55/2279 | 395/18866 | 0.1452579 | 0.4795329 | 0.4338983 | 55 | LRG1/RPTOR/RREB1/TACSTD2/NRP2/TGFA/IL10/PPARG/BRCA2/VDR/SMAD3/PRKCA/TNF/TNFAIP3/EGFL7/CCL5/MIR101-2/STAT5A/RTN4/THBS1/UHRF1/C5AR2/AKT3/MIR24-2/MIR27A/MIR23A/TCF7L2/PAX2/FLT1/CDH3/FGFR1/TGFB1/ZNF580/NF1/MTSS1/ITGB3/GHRL/GRN/PDGFB/VASH1/SGPP2/NOD2/RB1/NOTCH1/MEF2C/CPB2/AGTR1/RUNX3/DYSF/PPP1R16B/TNFSF12/PLCG1/ALDH1A2/NODAL/JAML |
| Biological Process | GO:0003209 | cardiac atrium morphogenesis                                                | 6/2279  | 30/18866  | 0.1462261 | 0.4820592 | 0.4361843 | 6  | ZFPM1/GJA5/CCM2L/ENG/NOTCH1/NSD2                                                                                                                                                                                                                                                                                                       |
| Biological Process | GO:0019098 | reproductive behavior                                                       | 6/2279  | 30/18866  | 0.1462261 | 0.4820592 | 0.4361843 | 6  | HDAC4/HEXB/PPP1R1B/APP/NCOA1/MAPK8IP2                                                                                                                                                                                                                                                                                                  |



|                    |            |                                                                            |         |           |           |           |           |    |                                                                                                                                                                                                                                                                                                                         |
|--------------------|------------|----------------------------------------------------------------------------|---------|-----------|-----------|-----------|-----------|----|-------------------------------------------------------------------------------------------------------------------------------------------------------------------------------------------------------------------------------------------------------------------------------------------------------------------------|
| Biological Process | GO:0043372 | positive regulation of CD4-positive, alpha-beta T cell differentiation     | 6/2279  | 30/18866  | 0.1462261 | 0.4820592 | 0.4361843 | 6  | PRKCZ/MYB/NLRP3/ZBTB7B/RARA/HLX                                                                                                                                                                                                                                                                                         |
| Biological Process | GO:0090314 | positive regulation of protein targeting to membrane                       | 6/2279  | 30/18866  | 0.1462261 | 0.4820592 | 0.4361843 | 6  | ITGB1BP1/ITGB2/FIS1/MYO1C/MIEF1/PDZK1                                                                                                                                                                                                                                                                                   |
| Biological Process | GO:0009582 | detection of abiotic stimulus                                              | 22/2279 | 144/18866 | 0.1463899 | 0.4822645 | 0.43637   | 22 | RCVRN/PDE6A/TTN/CACNA2D4/CRB1/ARRB1/DRGX/PKD1L1/JUP/PITPNM1/CCDC66/GNAT2/SCN1A/WDR47/GNA11/ARRB2/NTRK1/TRPM3/GRK7/TMC1/EYS/CABP4                                                                                                                                                                                        |
| Biological Process | GO:0070585 | protein localization to mitochondrion                                      | 22/2279 | 144/18866 | 0.1463899 | 0.4822645 | 0.43637   | 22 | HK1/TFDP1/YWHAH/PAM16/BMF/FBXO7/MIPEP/AIP/USP36/ABLIM3/UBE2J2/HK2/YWHAZ/FIS1/BCL2/DNM1L/TIMM44/TP53BP2/SREBF1/YWHAQ/PRKAA1/PRKN                                                                                                                                                                                         |
| Biological Process | GO:0042752 | regulation of circadian rhythm                                             | 19/2279 | 122/18866 | 0.1474683 | 0.4856487 | 0.4394322 | 19 | PPARG/CSNK1D/CREB1/KDM2A/PHLPP1/ZFH3/MTA1/GNA11/GHRL/CSNK1E/PPP1CB/ARNTL/PER2/PER1/FBXL6/UBE3A/USP2/FBXW11/PRKAA1                                                                                                                                                                                                       |
| Biological Process | GO:0003205 | cardiac chamber development                                                | 26/2279 | 174/18866 | 0.1477999 | 0.486572  | 0.4402676 | 26 | LTBP1/ZFPM1/RXRA/NRP2/MAML1/DNM2/SUFU/GJA5/CCM2L/TGFBR2/NDST1/RBPJ/SMAD7/WNT11/TGFB1/RARA/GRHL2/ENG/NOTCH1/MEF2C/FHL2/SLIT3/ANK2/LMO4/CPLANE1/NSD2                                                                                                                                                                      |
| Biological Process | GO:1903320 | regulation of protein modification by small protein conjugation or removal | 35/2279 | 242/18866 | 0.1481594 | 0.4875866 | 0.4411856 | 35 | HDAC4/FZR1/TOLLIP/ANGPT1/ARRB1/TNFAIP3/MIR101-2/CUL3/OTUB2/SMAD7/ZMIZ1/AXIN1/MTA1/TNIP1/BCL10/ARRB2/MIR138-2/PER2/OTUB1/NOD2/NXN/DNM1L/PRKCE/UBXN2A/UBE3A/TRIP12/DYSF/RELA/RNF40/BAG5/PARP10/PELI1/PAXIP1/PRKN/MARCH7                                                                                                   |
| Biological Process | GO:0032946 | positive regulation of mononuclear cell proliferation                      | 21/2279 | 137/18866 | 0.1494793 | 0.4913795 | 0.4446176 | 21 | HLA-DMB/CD55/CCR2/CCL5/NCK2/NFATC2/TNFSF13B/TLR9/TGFBR2/CCDC88B/PTPRC/CD320/SPTA1/ZNF335/PNP/BCL2/MEF2C/SLC7A1/FADD/PELI1/VAV3                                                                                                                                                                                          |
| Biological Process | GO:0051052 | regulation of DNA metabolic process                                        | 51/2279 | 365/18866 | 0.1495294 | 0.4913795 | 0.4446176 | 51 | FAM168A/BLM/SPIDR/IL10/PPARG/TFDP1/TNKS/HMBOX1/RMI2/PAM16/RAD52/SETD2/RTKL1/YLPM1/WRNIP1/RECQL5/OTUB2/TGFB1/UBE2V1/KDM1B/PARP4/PTPRC/GRHL2/SMG6/PDGFB/ARRB2/OTUB1/TP53BP1/SUB1/FOXO1/MORC1/NPPC/TRIP12/PDGFRB/ERCC1/TNFSF13/ANKRD1/SLX4/PARM1/KAT7/CCT6A/ERCC2/PARP9/PAXIP1/TFIP11/NSD2/CYREN/ABRAXAS1/SLF1/FBH1/BABAM2 |

|                    |            |                                                                    |         |           |           |           |           |    |                                                                                                                                                                                                              |
|--------------------|------------|--------------------------------------------------------------------|---------|-----------|-----------|-----------|-----------|----|--------------------------------------------------------------------------------------------------------------------------------------------------------------------------------------------------------------|
| Biological Process | GO:0048640 | negative regulation of developmental growth                        | 18/2279 | 115/18866 | 0.1502967 | 0.4913795 | 0.4446176 | 18 | SEMA6B/CTDP1/MIR199A1/BCL11A/VGLL4/SEMA4A/RTN4/TGFBR2/SEMA4B/RIPK1/IFRD1/SEMA4D/STK3/MEIS1/MIR199A2/RAI1/CDKL3/SPART                                                                                         |
| Biological Process | GO:0009636 | response to toxic substance                                        | 36/2279 | 250/18866 | 0.150394  | 0.4913795 | 0.4446176 | 36 | MPO/LCN2/LPO/TNF/CCL5/ABCC2/TRPM6/OSCP1/DDC/MBP/FECH/RALBP1/HBB/ADAMTS13/MGST2/SLC22A5/ABTB2/CAT/NFE2L2/CDH1/FIS1/BCL2/NXN/GSTO1/EPHX1/PDGFRB/SLC7A8/PDZK1/XPA/TXNRD2/GSTO2/SLC23A1/SIRT3/PRXL2B/PRKN/MTARC1 |
| Biological Process | GO:0008589 | regulation of smoothed signaling pathway                           | 14/2279 | 86/18866  | 0.1510364 | 0.4913795 | 0.4446176 | 14 | MGRN1/CHSY1/SUFU/NDST1/POR/RUNX2/IFT140/CREBBP/RB1/TTC21B/STK36/OTX2/KCTD21/TXNDC15                                                                                                                          |
| Biological Process | GO:1901863 | positive regulation of muscle tissue development                   | 14/2279 | 86/18866  | 0.1510364 | 0.4913795 | 0.4446176 | 14 | CREB1/MIR199A1/DLL1/RBPJ/FGFR1/TGFB1/ARRB2/ARNTL/BCL2/MIR199A2/NOTCH1/MEF2C/FLOT1/PRKAA1                                                                                                                     |
| Biological Process | GO:0071346 | cellular response to interferon-gamma                              | 27/2279 | 182/18866 | 0.1511873 | 0.4913795 | 0.4446176 | 27 | IRF8/TRIM38/PPARG/GSN/IRF5/TRIM8/CCL5/HLA-C/VPS26B/HLA-F/JAK1/TRIM5/RAB43/ADAMTS13/NR1H2/CCL20/ACTG1/NLRC5/SP100/CASP1/MYO1C/IRF2/SYNERIP/PARP9/CCL22/DAPK3/TRIM26                                           |
| Biological Process | GO:0090288 | negative regulation of cellular response to growth factor stimulus | 27/2279 | 182/18866 | 0.1511873 | 0.4913795 | 0.4446176 | 27 | LTBP1/SPRED2/SORL1/SKI/SMAD3/LDLRAD4/DNM2/MIR199A1/HIPK2/CHST11/TGFBR2/THBS1/SMAD7/TGFB1/EPN2/SMURF1/TGFB11/BMPER/HTRA4/PRDM16/MIR199A2/NOTCH1/NEDD4/HTRA3/HHEX/SPART/ADGRA2                                 |
| Biological Process | GO:0009167 | purine ribonucleoside monophosphate metabolic process              | 7/2279  | 37/18866  | 0.1519065 | 0.4913795 | 0.4446176 | 7  | AMPD3/TJP2/GUK1/AK2/GMPR2/LHPP/IMPDH1                                                                                                                                                                        |
| Biological Process | GO:0045191 | regulation of isotype switching                                    | 7/2279  | 37/18866  | 0.1519065 | 0.4913795 | 0.4446176 | 7  | IL10/TGFB1/PTPRC/TP53BP1/TNFSF13/PAXIP1/NSD2                                                                                                                                                                 |
| Biological Process | GO:0048846 | axon extension involved in axon guidance                           | 7/2279  | 37/18866  | 0.1519065 | 0.4913795 | 0.4446176 | 7  | SEMA6B/NRP2/SEMA4A/SEMA4B/SEMA4D/SLIT3/SLIT1                                                                                                                                                                 |

|                    |            |                                                                        |         |           |           |           |           |    |                                                                                                                                                                                                                                                                                                                                                                           |
|--------------------|------------|------------------------------------------------------------------------|---------|-----------|-----------|-----------|-----------|----|---------------------------------------------------------------------------------------------------------------------------------------------------------------------------------------------------------------------------------------------------------------------------------------------------------------------------------------------------------------------------|
| Biological Process | GO:0062208 | positive regulation of pattern recognition receptor signaling pathway  | 7/2279  | 37/18866  | 0.1519065 | 0.4913795 | 0.4446176 | 7  | TLR9/RTN4/TREML4/WDFY1/LTF/FLOT1/PELI1                                                                                                                                                                                                                                                                                                                                    |
| Biological Process | GO:0070423 | nucleotide-binding oligomerization domain containing signaling pathway | 7/2279  | 37/18866  | 0.1519065 | 0.4913795 | 0.4446176 | 7  | MAP2K6/TNFAIP3/UBE2V1/IRAK2/NOD2/CYLD/RELA                                                                                                                                                                                                                                                                                                                                |
| Biological Process | GO:1902284 | neuron projection extension involved in neuron projection guidance     | 7/2279  | 37/18866  | 0.1519065 | 0.4913795 | 0.4446176 | 7  | SEMA6B/NRP2/SEMA4A/SEMA4B/SEMA4D/SLIT3/SLIT1                                                                                                                                                                                                                                                                                                                              |
| Biological Process | GO:0051607 | defense response to virus                                              | 37/2279 | 258/18866 | 0.1525239 | 0.4913795 | 0.4446176 | 37 | AZU1/IL27/AIM2/TRIM38/IRF5/LYST/NLRP3/SETD2/TNFAIP3/TLR9/SPON2/CRCP/PHB/RIPK3/TRIM5/AGBL5/SEC14L1/PTPRC/NLRC5/ZDHHC1/MAP3K14/BCL2/TRAF3IP2/DDX41/BCL2L1/ILF3/MX1/IRF2/RELA/HERC5/PARP9/ISG20/FADD/STING1/SHFL/NCBP3/ILRUN                                                                                                                                                 |
| Biological Process | GO:0007492 | endoderm development                                                   | 13/2279 | 79/18866  | 0.1529333 | 0.4913795 | 0.4446176 | 13 | SETD2/SMAD3/COL4A2/COL12A1/HDAC1/ITGB5/ITGB2/NOTCH1/COL5A1/LAMB3/SSBP3/INHBA/NODAL                                                                                                                                                                                                                                                                                        |
| Biological Process | GO:0050000 | chromosome localization                                                | 13/2279 | 79/18866  | 0.1529333 | 0.4913795 | 0.4446176 | 13 | MAD1L1/NDE1/DYNC1H1/CHAMP1/CUL3/MIS12/DCTN2/NUMA1/RAD21L1/CDC45/SPAG5/NDEL1/TERB2                                                                                                                                                                                                                                                                                         |
| Biological Process | GO:0051303 | establishment of chromosome localization                               | 13/2279 | 79/18866  | 0.1529333 | 0.4913795 | 0.4446176 | 13 | MAD1L1/NDE1/DYNC1H1/CHAMP1/CUL3/MIS12/DCTN2/NUMA1/RAD21L1/CDC45/SPAG5/NDEL1/TERB2                                                                                                                                                                                                                                                                                         |
| Biological Process | GO:0000280 | nuclear division                                                       | 59/2279 | 428/18866 | 0.1539324 | 0.4913795 | 0.4446176 | 59 | ARHGEF10/CALR/FZR1/TGFA/CTDP1/MAD1L1/TTN/TNKS/MOV10L1/NDE1/BRCA2/PRKCA/NSMCE2/RCC1/CHAMP1/CUL3/EME1/CCDC8/MEIOB/CDC16/MIS12/DCTN2/FANCA/PRKCB/RNF212/TACC3/STAG1/NUMA1/PDGFBR/PPP2R1A/PLCB1/MSTO1/NEK6/CCNA1/RB1/RAD21L1/DMC1/CDC45/DIS3L2/CHEK2/ANAPC7/PDGFRB/SPAG5/HECW2/CDC14A/SLX4/TEX12/AURKAIP1/NDEL1/LPIN1/LIF/KLHDC3/DAPK3/PSMD13/CDK13/PCID2/TERB2/ABRAXAS1/SLF1 |
| Biological Process | GO:0044782 | cilium organization                                                    | 55/2279 | 397/18866 | 0.154282  | 0.4913795 | 0.4446176 | 55 | EHD1/DCTN1/GSN/CDKL1/CSNK1D/NDE1/KIAA0586/TNPO1/DNM2/DYNC1H1/DNAJB13/RFX3/DISC1/TUBB4B/CEP135/CCDC66/ABLIM3/POC1A/ASAP1/TTC39C/CEP164/DCTN2/CLUAP1/CEP78/HTT/WWTR1/IQCG/CSNK1E/IFT140/PPP2R1A/TUBA4A/SDCCAG8/RILPL1/TTC21B/NOTCH1/STK36/RPGRIP1/AVIL/ARMC2/KIFAP3/CYLD/CDC14A/DNAI2/HYLS1/CEP72/ABLIM1/TLL1/NPHP4/TXNDC15/SEPTIN9/CFAP221/CFAP61/CATIP/CFAP46/CPLANE1     |

|                    |            |                                                    |         |           |           |           |           |    |                                                                                                                                                                            |
|--------------------|------------|----------------------------------------------------|---------|-----------|-----------|-----------|-----------|----|----------------------------------------------------------------------------------------------------------------------------------------------------------------------------|
| Biological Process | GO:0051048 | negative regulation of secretion                   | 28/2279 | 190/18866 | 0.1543755 | 0.4913795 | 0.4446176 | 28 | ABR/TNFRSF1B/RAP1B/CCR2/RAB11FIP1/FRMD4A/MIR199A1/CD84/RHBDF2/COMT/GNAI2/HLA-F/TNFRSF1A/CRHBP/ENY2/NF1/GHRL/BCR/KLF7/MIR199A2/NOTCH1/F2R/SREBF1/ADTRP/INHBA/LIF/CBARP/PRKN |
| Biological Process | GO:0009124 | nucleoside monophosphate biosynthetic process      | 8/2279  | 44/18866  | 0.1549275 | 0.4913795 | 0.4446176 | 8  | AMPD3/TK2/UCK2/LHPP/DCTD/DHODH/TK1/IMPDH1                                                                                                                                  |
| Biological Process | GO:0033003 | regulation of mast cell activation                 | 8/2279  | 44/18866  | 0.1549275 | 0.4913795 | 0.4446176 | 8  | GAB2/FGR/CD84/CD226/SPHK2/FER/BLK/CNR2                                                                                                                                     |
| Biological Process | GO:0045684 | positive regulation of epidermis development       | 8/2279  | 44/18866  | 0.1549275 | 0.4913795 | 0.4446176 | 8  | VDR/TNF/KRT17/PRKCH/NUMA1/NOTCH1/ZBED2/MACROH2A2                                                                                                                           |
| Biological Process | GO:0060999 | positive regulation of dendritic spine development | 8/2279  | 44/18866  | 0.1549275 | 0.4913795 | 0.4446176 | 8  | ZMYND8/ITSN1/BAIAP2/CPEB3/DNM1L/SHANK2/CUX2/DBNL                                                                                                                           |
| Biological Process | GO:0085029 | extracellular matrix assembly                      | 8/2279  | 44/18866  | 0.1549275 | 0.4913795 | 0.4446176 | 8  | MFAP4/MYH11/SMAD3/TNXB/TGFB1/NOTCH1/LAMB3/HAS3                                                                                                                             |
| Biological Process | GO:1905521 | regulation of macrophage migration                 | 8/2279  | 44/18866  | 0.1549275 | 0.4913795 | 0.4446176 | 8  | CD9/C3AR1/CCL5/CSF1R/THBS1/MIR24-2/CXCL17/CX3CR1                                                                                                                           |
| Biological Process | GO:0010573 | vascular endothelial growth factor production      | 11/2279 | 65/18866  | 0.1557455 | 0.4913795 | 0.4446176 | 11 | C3AR1/MIR140/CCR2/MIR199A1/TNF/TGFB1/CXCL17/IL6R/MIR199A2/NODAL/NDRG2                                                                                                      |
| Biological Process | GO:0035308 | negative regulation of protein dephosphorylation   | 11/2279 | 65/18866  | 0.1557455 | 0.4913795 | 0.4446176 | 11 | LMTK2/MGAT5/PPP1R1B/URI1/CABIN1/TNF/GNAI2/ELFN2/PHACTR2/PPP1R16B/PTPA                                                                                                      |

|                    |            |                                                                                                  |         |           |           |           |           |    |                                                                                                                   |
|--------------------|------------|--------------------------------------------------------------------------------------------------|---------|-----------|-----------|-----------|-----------|----|-------------------------------------------------------------------------------------------------------------------|
| Biological Process | GO:0044786 | cell cycle DNA replication                                                                       | 11/2279 | 65/18866  | 0.1557455 | 0.4913795 | 0.4446176 | 11 | POLE/BRCA2/RTEL1/E2F7/MCM5/POLA2/FGFR1/MCM2/CHEK2/POLD3/POLE4                                                     |
| Biological Process | GO:1902305 | regulation of sodium ion transmembrane transport                                                 | 11/2279 | 65/18866  | 0.1557455 | 0.4913795 | 0.4446176 | 11 | FXYD2/YWHAH/FXYD1/DNM2/TESC/ACTN4/SNTA1/PRKCE/NEDD4/HECW2/FGF14                                                   |
| Biological Process | GO:0007173 | epidermal growth factor receptor signaling pathway                                               | 19/2279 | 123/18866 | 0.1557797 | 0.4913795 | 0.4446176 | 19 | TGFA/PIK3R1/ARHGEF7/NCK2/DOK1/RHBDF2/ARAP1/APP/EPS15L1/TGFB1/FER/PTPRJ/FAM83A/PDE6H/DGKD/DUSP3/EPS15/PLCG1/MVB12A |
| Biological Process | GO:1904375 | regulation of protein localization to cell periphery                                             | 19/2279 | 123/18866 | 0.1557797 | 0.4913795 | 0.4446176 | 19 | PRKCZ/PIK3R1/RHOG/TNF/ZDHHC2/MRAP/AKAP5/ZDHHC7/PPFIA1/LZTFL1/TGFB1/PRKCH/NUMB/CSK/NUMA1/PRKCI/PRKCE/BCL2L1/EZR    |
| Biological Process | GO:0007095 | mitotic G2 DNA damage checkpoint                                                                 | 5/2279  | 24/18866  | 0.1559062 | 0.4913795 | 0.4446176 | 5  | TRIM39/BLM/FOXN3/TAOK3/CLSPN                                                                                      |
| Biological Process | GO:0007141 | male meiosis I                                                                                   | 5/2279  | 24/18866  | 0.1559062 | 0.4913795 | 0.4446176 | 5  | MOV10L1/BRCA2/MEIOB/CCNA1/DMC1                                                                                    |
| Biological Process | GO:0010881 | regulation of cardiac muscle contraction by regulation of the release of sequestered calcium ion | 5/2279  | 24/18866  | 0.1559062 | 0.4913795 | 0.4446176 | 5  | CASQ2/CACNA1C/SLC8A1/GSTO1/ANK2                                                                                   |
| Biological Process | GO:0030325 | adrenal gland development                                                                        | 5/2279  | 24/18866  | 0.1559062 | 0.4913795 | 0.4446176 | 5  | ARID5B/SMAD3/WNT11/NF1/PDGFRB                                                                                     |
| Biological Process | GO:0032753 | positive regulation of interleukin-4 production                                                  | 5/2279  | 24/18866  | 0.1559062 | 0.4913795 | 0.4446176 | 5  | PRKCZ/NLRP3/RARA/SLC7A5/CEBPB                                                                                     |

|                    |            |                                                                    |        |          |           |           |           |   |                                  |
|--------------------|------------|--------------------------------------------------------------------|--------|----------|-----------|-----------|-----------|---|----------------------------------|
| Biological Process | GO:0034143 | regulation of toll-like receptor 4 signaling pathway               | 5/2279 | 24/18866 | 0.1559062 | 0.4913795 | 0.4446176 | 5 | MIR140/TNFAIP3/WDFY1/LTF/PELI1   |
| Biological Process | GO:0034505 | tooth mineralization                                               | 5/2279 | 24/18866 | 0.1559062 | 0.4913795 | 0.4446176 | 5 | ALPL/TSPEAR/FOXO1/FAM20C/NECTIN1 |
| Biological Process | GO:0045821 | positive regulation of glycolytic process                          | 5/2279 | 24/18866 | 0.1559062 | 0.4913795 | 0.4446176 | 5 | PFKFB4/APP/ESRRB/PFKFB3/PRKAA1   |
| Biological Process | GO:0046835 | carbohydrate phosphorylation                                       | 5/2279 | 24/18866 | 0.1559062 | 0.4913795 | 0.4446176 | 5 | NAGK/HK1/PFKFB4/HK2/PFKFB3       |
| Biological Process | GO:0051349 | positive regulation of lyase activity                              | 5/2279 | 24/18866 | 0.1559062 | 0.4913795 | 0.4446176 | 5 | RCVRN/TIMP2/CACNA1C/AKAP5/NF1    |
| Biological Process | GO:0060396 | growth hormone receptor signaling pathway                          | 5/2279 | 24/18866 | 0.1559062 | 0.4913795 | 0.4446176 | 5 | PIK3R1/STAT5A/PXN/GHRL/MBD5      |
| Biological Process | GO:0070841 | inclusion body assembly                                            | 5/2279 | 24/18866 | 0.1559062 | 0.4913795 | 0.4446176 | 5 | SORL1/CLU/DNAJB6/BAG5/PRKN       |
| Biological Process | GO:0099563 | modification of synaptic structure                                 | 5/2279 | 24/18866 | 0.1559062 | 0.4913795 | 0.4446176 | 5 | ITSN1/BAIAP2/PFN1/CYFIP1/SYNPO   |
| Biological Process | GO:1902993 | positive regulation of amyloid precursor protein catabolic process | 5/2279 | 24/18866 | 0.1559062 | 0.4913795 | 0.4446176 | 5 | TNF/ABCG1/APP/CLU/RELA           |

|                    |            |                                                                           |        |          |           |           |           |   |                                                              |
|--------------------|------------|---------------------------------------------------------------------------|--------|----------|-----------|-----------|-----------|---|--------------------------------------------------------------|
| Biological Process | GO:2000637 | positive regulation of gene silencing by miRNA                            | 5/2279 | 24/18866 | 0.1559062 | 0.4913795 | 0.4446176 | 5 | RIPK1/LIMD1/AGO2/TGFB1/EIF4G1                                |
| Biological Process | GO:0002204 | somatic recombination of immunoglobulin genes involved in immune response | 9/2279 | 51/18866 | 0.1562338 | 0.4913795 | 0.4446176 | 9 | IL10/UNG/TGFB1/PTPRC/TP53BP1/ERCC1/TNFSF13/PAXIP1/NSD2       |
| Biological Process | GO:0002208 | somatic diversification of immunoglobulins involved in immune response    | 9/2279 | 51/18866 | 0.1562338 | 0.4913795 | 0.4446176 | 9 | IL10/UNG/TGFB1/PTPRC/TP53BP1/ERCC1/TNFSF13/PAXIP1/NSD2       |
| Biological Process | GO:0006984 | ER-nucleus signaling pathway                                              | 9/2279 | 51/18866 | 0.1562338 | 0.4913795 | 0.4446176 | 9 | CALR/AMFR/MBTPS1/NCK2/ZBTB7B/NFE2L2/ARHGEF10L/SREBF1/SPRING1 |
| Biological Process | GO:0009161 | ribonucleoside monophosphate metabolic process                            | 9/2279 | 51/18866 | 0.1562338 | 0.4913795 | 0.4446176 | 9 | AMPD3/TJP2/UCK2/GUK1/AK2/GMPR2/LHPP/DHODH/IMPDH1             |
| Biological Process | GO:0045190 | isotype switching                                                         | 9/2279 | 51/18866 | 0.1562338 | 0.4913795 | 0.4446176 | 9 | IL10/UNG/TGFB1/PTPRC/TP53BP1/ERCC1/TNFSF13/PAXIP1/NSD2       |
| Biological Process | GO:0045912 | negative regulation of carbohydrate metabolic process                     | 9/2279 | 51/18866 | 0.1562338 | 0.4913795 | 0.4446176 | 9 | MAEA/HDAC4/AP2A1/C1QTNF3/CBFA2T3/PGP/TGFB1/SOGA1/PRKN        |
| Biological Process | GO:0050885 | neuromuscular process controlling balance                                 | 9/2279 | 51/18866 | 0.1562338 | 0.4913795 | 0.4446176 | 9 | ABR/HEXB/CDH23/APP/CAMTA1/NRXN1/BCR/SLC1A3/CNTNAP1           |
| Biological Process | GO:0060976 | coronary vasculature development                                          | 9/2279 | 51/18866 | 0.1562338 | 0.4913795 | 0.4446176 | 9 | LTBP1/MIR145/SETD2/DNM2/SUFU/NDST1/NOTCH1/PDGFRB/CPLANE1     |

|                    |            |                                                                                      |         |           |           |           |           |    |                                                                                                                                                                                                                                                                   |
|--------------------|------------|--------------------------------------------------------------------------------------|---------|-----------|-----------|-----------|-----------|----|-------------------------------------------------------------------------------------------------------------------------------------------------------------------------------------------------------------------------------------------------------------------|
| Biological Process | GO:0071354 | cellular response to interleukin-6                                                   | 9/2279  | 51/18866  | 0.1562338 | 0.4913795 | 0.4446176 | 9  | GF1/SBNO2/ABCC2/RIPK1/JAK1/PHB/FER/IL6R/RELA                                                                                                                                                                                                                      |
| Biological Process | GO:1900047 | negative regulation of hemostasis                                                    | 9/2279  | 51/18866  | 0.1562338 | 0.4913795 | 0.4446176 | 9  | PLAU/CD9/UBASH3B/SERPINB2/THBS1/F12/PDGFB/CPB2/ADTRP                                                                                                                                                                                                              |
| Biological Process | GO:1903573 | negative regulation of response to endoplasmic reticulum stress                      | 9/2279  | 51/18866  | 0.1562338 | 0.4913795 | 0.4446176 | 9  | NCK2/UBAC2/DERL2/CLU/NR1H2/BCL2L1/GRINA/SVIP/PRKN                                                                                                                                                                                                                 |
| Biological Process | GO:0003015 | heart process                                                                        | 42/2279 | 297/18866 | 0.1563831 | 0.4913795 | 0.4446176 | 42 | HDAC4/PDE4D/KCNE1/TTN/CASQ2/ITPR2/FXYD2/MAP2K6/CACNA1C/AKAP13/CACNA2D4/FXYD1/SLC8A1/GJA5/ATP2B2/ITPR1/JUP/BIN1/GNAI2/NOS1AP/SMAD7/KCNIP1/SCN1A/KCNK6/WWTR1/CHRM2/ATP2A3/CELF2/SNTA1/KCNQ1/GSTO1/GNAO1/DNM1L/EPAS1/NPPC/CACNA1B/ANK2/ASPH/SREBF1/CASQ1/SPTBN4/GRK2 |
| Biological Process | GO:0007091 | metaphase/anaphase transition of mitotic cell cycle                                  | 10/2279 | 58/18866  | 0.1563881 | 0.4913795 | 0.4446176 | 10 | MAD1L1/NSMCE2/CUL3/CDC16/TACC3/NEK6/RB1/ANAPC7/HECW2/PCID2                                                                                                                                                                                                        |
| Biological Process | GO:1903749 | positive regulation of establishment of protein localization to mitochondrion        | 10/2279 | 58/18866  | 0.1563881 | 0.4913795 | 0.4446176 | 10 | TFDP1/YWHAH/USP36/ABLIM3/UBE2J2/YWHAZ/BCL2/TP53BP2/YWHAQ/PRKAA1                                                                                                                                                                                                   |
| Biological Process | GO:0090276 | regulation of peptide hormone secretion                                              | 31/2279 | 213/18866 | 0.1564522 | 0.4913795 | 0.4446176 | 31 | NADK/ITPR2/MYRIP/CACNA1C/LRP5L/ARRB1/PRKCA/GPLD1/TNF/CCL5/ITSN1/ITPR1/RFX3/TCF7L2/CRHBP/ENY2/GIPR/BLK/GHRL/KLF7/ARNTL/PER2/SLC16A1/PRKCE/SLC2A1/SREBF1/CPT1A/RPH3AL/C2CD2L/SIRT3/PRKN                                                                             |
| Biological Process | GO:0000730 | DNA recombinase assembly                                                             | 2/2279  | 6/18866   | 0.1573345 | 0.4913795 | 0.4446176 | 2  | RAD52/DMC1                                                                                                                                                                                                                                                        |
| Biological Process | GO:0000972 | transcription-dependent tethering of RNA polymerase II gene DNA at nuclear periphery | 2/2279  | 6/18866   | 0.1573345 | 0.4913795 | 0.4446176 | 2  | RAE1/PCID2                                                                                                                                                                                                                                                        |



|                    |            |                                                                                                                       |        |         |           |           |           |   |              |
|--------------------|------------|-----------------------------------------------------------------------------------------------------------------------|--------|---------|-----------|-----------|-----------|---|--------------|
| Biological Process | GO:0001302 | replicative cell aging                                                                                                | 2/2279 | 6/18866 | 0.1573345 | 0.4913795 | 0.4446176 | 2 | CHEK2/ERCC1  |
| Biological Process | GO:0001999 | renal response to blood flow involved in circulatory renin-angiotensin regulation of systemic arterial blood pressure | 2/2279 | 6/18866 | 0.1573345 | 0.4913795 | 0.4446176 | 2 | GJA5/F2R     |
| Biological Process | GO:0002001 | renin secretion into blood stream                                                                                     | 2/2279 | 6/18866 | 0.1573345 | 0.4913795 | 0.4446176 | 2 | GJA5/F2R     |
| Biological Process | GO:0002326 | B cell lineage commitment                                                                                             | 2/2279 | 6/18866 | 0.1573345 | 0.4913795 | 0.4446176 | 2 | BCL2/TCF3    |
| Biological Process | GO:0002501 | peptide antigen assembly with MHC protein complex                                                                     | 2/2279 | 6/18866 | 0.1573345 | 0.4913795 | 0.4446176 | 2 | HLA-DMB/CALR |
| Biological Process | GO:0003097 | renal water transport                                                                                                 | 2/2279 | 6/18866 | 0.1573345 | 0.4913795 | 0.4446176 | 2 | AQP1/AQP3    |
| Biological Process | GO:0003160 | endocardium morphogenesis                                                                                             | 2/2279 | 6/18866 | 0.1573345 | 0.4913795 | 0.4446176 | 2 | RBPJ/NOTCH1  |
| Biological Process | GO:0003175 | tricuspid valve development                                                                                           | 2/2279 | 6/18866 | 0.1573345 | 0.4913795 | 0.4446176 | 2 | ZFPM1/TGFBR2 |
| Biological Process | GO:0003284 | septum primum development                                                                                             | 2/2279 | 6/18866 | 0.1573345 | 0.4913795 | 0.4446176 | 2 | GJA5/NSD2    |

|                    |            |                                                                       |        |         |           |           |           |   |               |
|--------------------|------------|-----------------------------------------------------------------------|--------|---------|-----------|-----------|-----------|---|---------------|
| Biological Process | GO:0006114 | glycerol biosynthetic process                                         | 2/2279 | 6/18866 | 0.1573345 | 0.4913795 | 0.4446176 | 2 | PGP/PCK2      |
| Biological Process | GO:0006501 | C-terminal protein lipidation                                         | 2/2279 | 6/18866 | 0.1573345 | 0.4913795 | 0.4446176 | 2 | GPLD1/WIPI2   |
| Biological Process | GO:0006682 | galactosylceramide biosynthetic process                               | 2/2279 | 6/18866 | 0.1573345 | 0.4913795 | 0.4446176 | 2 | B4GALT3/FA2H  |
| Biological Process | GO:0007182 | common-partner SMAD protein phosphorylation                           | 2/2279 | 6/18866 | 0.1573345 | 0.4913795 | 0.4446176 | 2 | TGFBR2/TGFB1  |
| Biological Process | GO:0007185 | transmembrane receptor protein tyrosine phosphatase signaling pathway | 2/2279 | 6/18866 | 0.1573345 | 0.4913795 | 0.4446176 | 2 | TRIO/PTPRU    |
| Biological Process | GO:0009186 | deoxyribonucleoside diphosphate metabolic process                     | 2/2279 | 6/18866 | 0.1573345 | 0.4913795 | 0.4446176 | 2 | GUK1/AK5      |
| Biological Process | GO:0009838 | abscission                                                            | 2/2279 | 6/18866 | 0.1573345 | 0.4913795 | 0.4446176 | 2 | ZFYVE19/SPART |
| Biological Process | GO:0010626 | negative regulation of Schwann cell proliferation                     | 2/2279 | 6/18866 | 0.1573345 | 0.4913795 | 0.4446176 | 2 | SKI/CERS2     |
| Biological Process | GO:0010756 | positive regulation of plasminogen activation                         | 2/2279 | 6/18866 | 0.1573345 | 0.4913795 | 0.4446176 | 2 | ENO1/F12      |

|                    |            |                                                                                   |        |         |           |           |           |   |                |
|--------------------|------------|-----------------------------------------------------------------------------------|--------|---------|-----------|-----------|-----------|---|----------------|
| Biological Process | GO:0010792 | DNA double-strand break processing involved in repair via single-strand annealing | 2/2279 | 6/18866 | 0.1573345 | 0.4913795 | 0.4446176 | 2 | RAD52/SLX4     |
| Biological Process | GO:0015838 | amino-acid betaine transport                                                      | 2/2279 | 6/18866 | 0.1573345 | 0.4913795 | 0.4446176 | 2 | SLC22A5/PDZK1  |
| Biological Process | GO:0018364 | peptidyl-glutamine methylation                                                    | 2/2279 | 6/18866 | 0.1573345 | 0.4913795 | 0.4446176 | 2 | CREBBP/FBL     |
| Biological Process | GO:0019375 | galactolipid biosynthetic process                                                 | 2/2279 | 6/18866 | 0.1573345 | 0.4913795 | 0.4446176 | 2 | B4GALT3/FA2H   |
| Biological Process | GO:0019800 | peptide cross-linking via chondroitin 4-sulfate glycosaminoglycan                 | 2/2279 | 6/18866 | 0.1573345 | 0.4913795 | 0.4446176 | 2 | SPOCK2/EGFLAM  |
| Biological Process | GO:0021540 | corpus callosum morphogenesis                                                     | 2/2279 | 6/18866 | 0.1573345 | 0.4913795 | 0.4446176 | 2 | ZEB2/TSKU      |
| Biological Process | GO:0030579 | ubiquitin-dependent SMAD protein catabolic process                                | 2/2279 | 6/18866 | 0.1573345 | 0.4913795 | 0.4446176 | 2 | SMURF1/TGFB111 |
| Biological Process | GO:0031584 | activation of phospholipase D activity                                            | 2/2279 | 6/18866 | 0.1573345 | 0.4913795 | 0.4446176 | 2 | PRKCZ/CCL5     |
| Biological Process | GO:0031999 | negative regulation of fatty acid beta-oxidation                                  | 2/2279 | 6/18866 | 0.1573345 | 0.4913795 | 0.4446176 | 2 | MFSD2A/ACACB   |

|                    |            |                                                                    |        |         |           |           |           |   |                |
|--------------------|------------|--------------------------------------------------------------------|--------|---------|-----------|-----------|-----------|---|----------------|
| Biological Process | GO:0032106 | positive regulation of response to extracellular stimulus          | 2/2279 | 6/18866 | 0.1573345 | 0.4913795 | 0.4446176 | 2 | GHRL/NPY       |
| Biological Process | GO:0032109 | positive regulation of response to nutrient levels                 | 2/2279 | 6/18866 | 0.1573345 | 0.4913795 | 0.4446176 | 2 | GHRL/NPY       |
| Biological Process | GO:0032286 | central nervous system myelin maintenance                          | 2/2279 | 6/18866 | 0.1573345 | 0.4913795 | 0.4446176 | 2 | CLU/FA2H       |
| Biological Process | GO:0032415 | regulation of sodium:proton antiporter activity                    | 2/2279 | 6/18866 | 0.1573345 | 0.4913795 | 0.4446176 | 2 | TESC/ACTN4     |
| Biological Process | GO:0032534 | regulation of microvillus assembly                                 | 2/2279 | 6/18866 | 0.1573345 | 0.4913795 | 0.4446176 | 2 | PLD1/ATP8B1    |
| Biological Process | GO:0032962 | positive regulation of inositol trisphosphate biosynthetic process | 2/2279 | 6/18866 | 0.1573345 | 0.4913795 | 0.4446176 | 2 | P2RY6/HRH1     |
| Biological Process | GO:0033239 | negative regulation of cellular amine metabolic process            | 2/2279 | 6/18866 | 0.1573345 | 0.4913795 | 0.4446176 | 2 | COMT/ITGB2     |
| Biological Process | GO:0034036 | purine ribonucleoside bisphosphate biosynthetic process            | 2/2279 | 6/18866 | 0.1573345 | 0.4913795 | 0.4446176 | 2 | SLC26A1/PAPSS2 |
| Biological Process | GO:0034316 | negative regulation of Arp2/3 complex-mediated actin nucleation    | 2/2279 | 6/18866 | 0.1573345 | 0.4913795 | 0.4446176 | 2 | GMFB/GMFG      |

|                    |            |                                                            |        |         |           |           |           |   |                |
|--------------------|------------|------------------------------------------------------------|--------|---------|-----------|-----------|-----------|---|----------------|
| Biological Process | GO:0034334 | adherens junction maintenance                              | 2/2279 | 6/18866 | 0.1573345 | 0.4913795 | 0.4446176 | 2 | PLEKHA7/KIFC3  |
| Biological Process | GO:0036446 | myofibroblast differentiation                              | 2/2279 | 6/18866 | 0.1573345 | 0.4913795 | 0.4446176 | 2 | MIR145/RB1     |
| Biological Process | GO:0038145 | macrophage colony-stimulating factor signaling pathway     | 2/2279 | 6/18866 | 0.1573345 | 0.4913795 | 0.4446176 | 2 | CSF1R/DOK1     |
| Biological Process | GO:0043570 | maintenance of DNA repeat elements                         | 2/2279 | 6/18866 | 0.1573345 | 0.4913795 | 0.4446176 | 2 | RM12/TCF7L2    |
| Biological Process | GO:0044245 | polysaccharide digestion                                   | 2/2279 | 6/18866 | 0.1573345 | 0.4913795 | 0.4446176 | 2 | MGAM/CHIT1     |
| Biological Process | GO:0046113 | nucleobase catabolic process                               | 2/2279 | 6/18866 | 0.1573345 | 0.4913795 | 0.4446176 | 2 | DPYS/AOX1      |
| Biological Process | GO:0048023 | positive regulation of melanin biosynthetic process        | 2/2279 | 6/18866 | 0.1573345 | 0.4913795 | 0.4446176 | 2 | ZEB2/CDH3      |
| Biological Process | GO:0050428 | 3'-phosphoadenosine 5'-phosphosulfate biosynthetic process | 2/2279 | 6/18866 | 0.1573345 | 0.4913795 | 0.4446176 | 2 | SLC26A1/PAPSS2 |
| Biological Process | GO:0051459 | regulation of corticotropin secretion                      | 2/2279 | 6/18866 | 0.1573345 | 0.4913795 | 0.4446176 | 2 | CRHBP/GHRL     |

|                    |            |                                                                                      |        |         |           |           |           |   |               |
|--------------------|------------|--------------------------------------------------------------------------------------|--------|---------|-----------|-----------|-----------|---|---------------|
| Biological Process | GO:0060136 | embryonic process involved in female pregnancy                                       | 2/2279 | 6/18866 | 0.1573345 | 0.4913795 | 0.4446176 | 2 | SP3/NODAL     |
| Biological Process | GO:0060268 | negative regulation of respiratory burst                                             | 2/2279 | 6/18866 | 0.1573345 | 0.4913795 | 0.4446176 | 2 | GRN/BCR       |
| Biological Process | GO:0060332 | positive regulation of response to interferon-gamma                                  | 2/2279 | 6/18866 | 0.1573345 | 0.4913795 | 0.4446176 | 2 | NLRC5/PARP9   |
| Biological Process | GO:0060335 | positive regulation of interferon-gamma-mediated signaling pathway                   | 2/2279 | 6/18866 | 0.1573345 | 0.4913795 | 0.4446176 | 2 | NLRC5/PARP9   |
| Biological Process | GO:0060385 | axonogenesis involved in innervation                                                 | 2/2279 | 6/18866 | 0.1573345 | 0.4913795 | 0.4446176 | 2 | NTRK1/NPTX1   |
| Biological Process | GO:0060545 | positive regulation of necroptotic process                                           | 2/2279 | 6/18866 | 0.1573345 | 0.4913795 | 0.4446176 | 2 | RIPK1/RIPK3   |
| Biological Process | GO:0061181 | regulation of chondrocyte development                                                | 2/2279 | 6/18866 | 0.1573345 | 0.4913795 | 0.4446176 | 2 | SMAD7/RFLNA   |
| Biological Process | GO:0061734 | parkin-mediated stimulation of mitophagy in response to mitochondrial depolarization | 2/2279 | 6/18866 | 0.1573345 | 0.4913795 | 0.4446176 | 2 | SMURF1/PRKN   |
| Biological Process | GO:0061817 | endoplasmic reticulum-plasma membrane tethering                                      | 2/2279 | 6/18866 | 0.1573345 | 0.4913795 | 0.4446176 | 2 | ESYT1/GRAMD2A |

|                    |            |                                                                   |        |         |           |           |           |   |                   |
|--------------------|------------|-------------------------------------------------------------------|--------|---------|-----------|-----------|-----------|---|-------------------|
| Biological Process | GO:0062100 | positive regulation of programmed necrotic cell death             | 2/2279 | 6/18866 | 0.1573345 | 0.4913795 | 0.4446176 | 2 | RIPK1/RIPK3       |
| Biological Process | GO:0070162 | adiponectin secretion                                             | 2/2279 | 6/18866 | 0.1573345 | 0.4913795 | 0.4446176 | 2 | C1QTNF3/RAB11FIP1 |
| Biological Process | GO:0070163 | regulation of adiponectin secretion                               | 2/2279 | 6/18866 | 0.1573345 | 0.4913795 | 0.4446176 | 2 | C1QTNF3/RAB11FIP1 |
| Biological Process | GO:0071921 | cohesin loading                                                   | 2/2279 | 6/18866 | 0.1573345 | 0.4913795 | 0.4446176 | 2 | RB1/CDCA5         |
| Biological Process | GO:0072014 | proximal tubule development                                       | 2/2279 | 6/18866 | 0.1573345 | 0.4913795 | 0.4446176 | 2 | DLL1/ACAT1        |
| Biological Process | GO:0072679 | thymocyte migration                                               | 2/2279 | 6/18866 | 0.1573345 | 0.4913795 | 0.4446176 | 2 | CCR2/CCL20        |
| Biological Process | GO:0086029 | Purkinje myocyte to ventricular cardiac muscle cell signaling     | 2/2279 | 6/18866 | 0.1573345 | 0.4913795 | 0.4446176 | 2 | CASQ2/GJA5        |
| Biological Process | GO:0086068 | Purkinje myocyte to ventricular cardiac muscle cell communication | 2/2279 | 6/18866 | 0.1573345 | 0.4913795 | 0.4446176 | 2 | CASQ2/GJA5        |
| Biological Process | GO:0089709 | L-histidine transmembrane transport                               | 2/2279 | 6/18866 | 0.1573345 | 0.4913795 | 0.4446176 | 2 | SLC15A4/SLC7A1    |

|                    |            |                                                            |        |         |           |           |           |   |                |
|--------------------|------------|------------------------------------------------------------|--------|---------|-----------|-----------|-----------|---|----------------|
| Biological Process | GO:0090155 | negative regulation of sphingolipid biosynthetic process   | 2/2279 | 6/18866 | 0.1573345 | 0.4913795 | 0.4446176 | 2 | ORMDL3/PRKAA1  |
| Biological Process | GO:0090241 | negative regulation of histone H4 acetylation              | 2/2279 | 6/18866 | 0.1573345 | 0.4913795 | 0.4446176 | 2 | CTBP1/PIH1D1   |
| Biological Process | GO:0090272 | negative regulation of fibroblast growth factor production | 2/2279 | 6/18866 | 0.1573345 | 0.4913795 | 0.4446176 | 2 | WNT11/FGFR1    |
| Biological Process | GO:0090315 | negative regulation of protein targeting to membrane       | 2/2279 | 6/18866 | 0.1573345 | 0.4913795 | 0.4446176 | 2 | KCNE1/ITGB1BP1 |
| Biological Process | GO:0090678 | cell dedifferentiation involved in phenotypic switching    | 2/2279 | 6/18866 | 0.1573345 | 0.4913795 | 0.4446176 | 2 | MIR145/PDGFB   |
| Biological Process | GO:0090735 | DNA repair complex assembly                                | 2/2279 | 6/18866 | 0.1573345 | 0.4913795 | 0.4446176 | 2 | RAD52/DMC1     |
| Biological Process | GO:0098704 | carbohydrate import across plasma membrane                 | 2/2279 | 6/18866 | 0.1573345 | 0.4913795 | 0.4446176 | 2 | SLC2A5/SLC2A1  |
| Biological Process | GO:0106001 | intestinal hexose absorption                               | 2/2279 | 6/18866 | 0.1573345 | 0.4913795 | 0.4446176 | 2 | SLC2A5/EZR     |
| Biological Process | GO:0140271 | hexose import across plasma membrane                       | 2/2279 | 6/18866 | 0.1573345 | 0.4913795 | 0.4446176 | 2 | SLC2A5/SLC2A1  |



|                    |            |                                                                  |        |         |           |           |           |   |               |
|--------------------|------------|------------------------------------------------------------------|--------|---------|-----------|-----------|-----------|---|---------------|
| Biological Process | GO:1900028 | negative regulation of ruffle assembly                           | 2/2279 | 6/18866 | 0.1573345 | 0.4913795 | 0.4446176 | 2 | TACSTD2/KANK1 |
| Biological Process | GO:1900157 | regulation of bone mineralization involved in bone maturation    | 2/2279 | 6/18866 | 0.1573345 | 0.4913795 | 0.4446176 | 2 | LTF/RFLNA     |
| Biological Process | GO:1900241 | positive regulation of phenotypic switching                      | 2/2279 | 6/18866 | 0.1573345 | 0.4913795 | 0.4446176 | 2 | MIR140/PDGFB  |
| Biological Process | GO:1900378 | positive regulation of secondary metabolite biosynthetic process | 2/2279 | 6/18866 | 0.1573345 | 0.4913795 | 0.4446176 | 2 | ZEB2/CDH3     |
| Biological Process | GO:1901552 | positive regulation of endothelial cell development              | 2/2279 | 6/18866 | 0.1573345 | 0.4913795 | 0.4446176 | 2 | ADD1/S1PR2    |
| Biological Process | GO:1901668 | regulation of superoxide dismutase activity                      | 2/2279 | 6/18866 | 0.1573345 | 0.4913795 | 0.4446176 | 2 | TNF/SIRT3     |
| Biological Process | GO:1902396 | protein localization to bicellular tight junction                | 2/2279 | 6/18866 | 0.1573345 | 0.4913795 | 0.4446176 | 2 | ACTN4/ACTG1   |
| Biological Process | GO:1902498 | regulation of protein autoubiquitination                         | 2/2279 | 6/18866 | 0.1573345 | 0.4913795 | 0.4446176 | 2 | MTA1/MARCHF7  |
| Biological Process | GO:1903142 | positive regulation of establishment of endothelial barrier      | 2/2279 | 6/18866 | 0.1573345 | 0.4913795 | 0.4446176 | 2 | ADD1/S1PR2    |

|                    |            |                                                                                              |        |         |           |           |           |   |                   |
|--------------------|------------|----------------------------------------------------------------------------------------------|--------|---------|-----------|-----------|-----------|---|-------------------|
| Biological Process | GO:1903911 | positive regulation of receptor clustering                                                   | 2/2279 | 6/18866 | 0.1573345 | 0.4913795 | 0.4446176 | 2 | SSH1/ZDHHC2       |
| Biological Process | GO:1905005 | regulation of epithelial to mesenchymal transition involved in endocardial cushion formation | 2/2279 | 6/18866 | 0.1573345 | 0.4913795 | 0.4446176 | 2 | TGFB2/ENG         |
| Biological Process | GO:1905174 | regulation of vascular associated smooth muscle cell dedifferentiation                       | 2/2279 | 6/18866 | 0.1573345 | 0.4913795 | 0.4446176 | 2 | MIR145/PDGFB      |
| Biological Process | GO:1905178 | regulation of cardiac muscle tissue regeneration                                             | 2/2279 | 6/18866 | 0.1573345 | 0.4913795 | 0.4446176 | 2 | MIR199A1/MIR199A2 |
| Biological Process | GO:1990936 | vascular associated smooth muscle cell dedifferentiation                                     | 2/2279 | 6/18866 | 0.1573345 | 0.4913795 | 0.4446176 | 2 | MIR145/PDGFB      |
| Biological Process | GO:2000110 | negative regulation of macrophage apoptotic process                                          | 2/2279 | 6/18866 | 0.1573345 | 0.4913795 | 0.4446176 | 2 | CCL5/NOD2         |
| Biological Process | GO:2000348 | regulation of CD40 signaling pathway                                                         | 2/2279 | 6/18866 | 0.1573345 | 0.4913795 | 0.4446176 | 2 | TNFAIP3/FANCA     |
| Biological Process | GO:2001137 | positive regulation of endocytic recycling                                                   | 2/2279 | 6/18866 | 0.1573345 | 0.4913795 | 0.4446176 | 2 | EHD1/SORL1        |
| Biological Process | GO:2001186 | negative regulation of CD8-positive, alpha-beta T cell activation                            | 2/2279 | 6/18866 | 0.1573345 | 0.4913795 | 0.4446176 | 2 | ZBTB7B/VSIR       |

|                    |            |                                                            |         |           |           |           |           |    |                                                                                                                                                                                                                                                                                                        |
|--------------------|------------|------------------------------------------------------------|---------|-----------|-----------|-----------|-----------|----|--------------------------------------------------------------------------------------------------------------------------------------------------------------------------------------------------------------------------------------------------------------------------------------------------------|
| Biological Process | GO:0007626 | locomotory behavior                                        | 29/2279 | 198/18866 | 0.15738   | 0.4913795 | 0.4446176 | 29 | HEXB/PPP1R1B/LGI4/CDH23/HIPK2/ZFH3/APP/ZNF385A/APBA2/SCN1A/MTA1/MYO5A/ESPN/WDR47/GMFB/ARRB2/NPC1/MEIS1/GNAO1/PRKCE/CACNA1B/USP2/NCOA2/TMOD1/NTAN1/INPP5F/SPTBN4/NTF4/PRKN                                                                                                                              |
| Biological Process | GO:0001666 | response to hypoxia                                        | 50/2279 | 359/18866 | 0.157856  | 0.4927037 | 0.4458158 | 50 | P4HB/ENO1/PLAU/ITPR2/MIR140/TM9SF4/CREB1/MYB/NDRG1/SMAD3/SLC8A1/HIPK2/CBFA2T3/ITPR1/SLC11A2/TGFBR2/THBS1/RBPJ/ACTN4/LIMD1/AQP1/NF1/HK2/ALAS1/AGTRAP/PSMF1/CREBBP/NOL3/CAT/ETS1/NFE2L2/FIS1/PKM/BCL2/PSMB7/NOTCH1/AQP3/DNM1L/EPAS1/PRKCE/NPPC/SLC2A1/ANKRD1/SLC29A1/BACH1/HSD11B2/ERCC2/PSMD13/MB/PKAA1 |
| Biological Process | GO:0006986 | response to unfolded protein                               | 27/2279 | 183/18866 | 0.1580278 | 0.493078  | 0.4461545 | 27 | DCTN1/CALR/ERN1/PIK3R1/AMFR/MBTPS1/RHBDD2/NCK2/YIF1A/THBS1/EDEM1/DERL2/ZBTB17/PDIA5/HSPA4L/UBE2J2/CLGN/COPS5/EDEM2/CREB3L2/NFE2L2/ADD1/TOR1B/KLHDC3/SEC31A/ACADVL/PRKN                                                                                                                                 |
| Biological Process | GO:0030048 | actin filament-based movement                              | 23/2279 | 153/18866 | 0.1581429 | 0.4932751 | 0.4463328 | 23 | PDE4D/KCNE1/TTN/CCDC88C/CACNA1C/MYO9B/WIPF1/GJA5/TNNT3/JUP/BIN1/MYH9/NOS1AP/ACTN4/SCN1A/WASL/MYO5A/SNTA1/KCNQ1/MYO1C/ANK2/FRMD6/TMOD1                                                                                                                                                                  |
| Biological Process | GO:0071772 | response to BMP                                            | 25/2279 | 168/18866 | 0.1583171 | 0.4934942 | 0.4465311 | 25 | SORL1/MIR140/SKI/SMAD3/SPINT2/HIPK2/RBPJ/UBE2O/ILK/PCSK6/SMAD7/TGFB1/SMURF1/BMPER/BMPR1B/RUNX2/NUMA1/ENG/NOTCH1/SLC33A1/HTRA3/GDF6/ZNF423/NODAL/SPART                                                                                                                                                  |
| Biological Process | GO:0071773 | cellular response to BMP stimulus                          | 25/2279 | 168/18866 | 0.1583171 | 0.4934942 | 0.4465311 | 25 | SORL1/MIR140/SKI/SMAD3/SPINT2/HIPK2/RBPJ/UBE2O/ILK/PCSK6/SMAD7/TGFB1/SMURF1/BMPER/BMPR1B/RUNX2/NUMA1/ENG/NOTCH1/SLC33A1/HTRA3/GDF6/ZNF423/NODAL/SPART                                                                                                                                                  |
| Biological Process | GO:0019319 | hexose biosynthetic process                                | 15/2279 | 94/18866  | 0.1585929 | 0.4940299 | 0.4470158 | 15 | MAEA/ENO1/C1QTNF3/PGP/CHST15/PGAM1/PC/DGKQ/ENO3/PER2/PCK2/FOXO1/SOGA1/SLC25A1/SDHAF3                                                                                                                                                                                                                   |
| Biological Process | GO:1901992 | positive regulation of mitotic cell cycle phase transition | 15/2279 | 94/18866  | 0.1585929 | 0.4940299 | 0.4470158 | 15 | RPTOR/BRD4/TFDP1/NSMCE2/CUL3/APP/CDC16/CDC25A/TMOD3/PLCB1/RB1/CDC45/ANAPC7/PLRG1/EIF4G1                                                                                                                                                                                                                |
| Biological Process | GO:0010976 | positive regulation of neuron projection development       | 41/2279 | 290/18866 | 0.1601146 | 0.4986067 | 0.4511571 | 41 | CPNE6/PLXNC1/AP2A1/TMEM30A/ZMYND8/CPNE5/ZEB2/ITSN1/DISC1/CUX1/BAIAP2/SNX3/ILK/FGFR1/SEMA4D/RAPGEF2/SMURF1/SS18L2/CPEB3/CAMK1D/CDH4/GRN/CREB3L2/PRKCI/NFE2L2/ARSB/NTRK1/CDKL3/DNM1L/AVIL/SHANK2/SYT17/ANKRD1/MARK2/CYFIP1/TRPV2/NDEL1/CUX2/DBNL/PRKN/P3H1                                               |

|                    |            |                                         |         |           |           |           |           |    |                                                                                                                                                                                                                                                                                                                                                                                      |
|--------------------|------------|-----------------------------------------|---------|-----------|-----------|-----------|-----------|----|--------------------------------------------------------------------------------------------------------------------------------------------------------------------------------------------------------------------------------------------------------------------------------------------------------------------------------------------------------------------------------------|
| Biological Process | GO:0003231 | cardiac ventricle development           | 20/2279 | 131/18866 | 0.1608221 | 0.5004816 | 0.4528535 | 20 | LTBP1/ZFPM1/RXRA/DNM2/SUFU/GJA5/CCM2L/TGFBR2/RBPJ/SMAD7/WNT11/TGFB1/GRHL2/ENG/NOTCH1/MEF2C/SLIT3/LMO4/CPLANE1/NSD2                                                                                                                                                                                                                                                                   |
| Biological Process | GO:0019218 | regulation of steroid metabolic process | 20/2279 | 131/18866 | 0.1608221 | 0.5004816 | 0.4528535 | 20 | GFI1/IDI1/VDR/MBTPS1/TNF/ABCG1/MIR27A/DGKQ/SF1/POR/GNB3/ACACB/ACACA/LMF1/AGTR1/HMGCS1/SCD/SREBF1/ACADVL/PRKAA1                                                                                                                                                                                                                                                                       |
| Biological Process | GO:0050673 | epithelial cell proliferation           | 62/2279 | 453/18866 | 0.1611029 | 0.5011473 | 0.4534559 | 62 | LRG1/RPTOR/RREB1/TACSTD2/NRP2/TGFA/IL10/PPARG/RPS6KA1/BRCA2/ERN1/ITGB1BP1/VDR/SMAD3/PRKCA/TNF/TNFAIP3/EGFL7/CCL5/C6orf89/MIR101-2/STAT5A/RTN4/THBS1/UHRF1/C5AR2/AKT3/MIR24-2/MIR27A/MIR23A/TCF7L2/PAX2/FLT1/CDH3/FGFR1/TGFB1/ZNF580/NF1/MTSS1/BMPER/ITGB3/GHRL/GRN/PDGFB/EHF/VASH1/SGPP2/NOD2/RB1/NOTCH1/MEF2C/CPB2/CEBPB/AGTR1/RUNX3/DYSF/PPP1R16B/TNFSF12/PLCG1/ALDH1A2/NODAL/JAML |
| Biological Process | GO:1901214 | regulation of neuron death              | 45/2279 | 321/18866 | 0.1611415 | 0.5011473 | 0.4534559 | 45 | HDAC4/CTS2/SORL1/SSH1/IL10/CREB1/MYB/ANGPT1/TNFRSF1B/SRPK2/ARRB1/TNF/TRAF2/CCL5/FBXO7/HIPK2/ITSN1/UNC5B/HLA-F/ILK/CLU/SYNGAP1/ZNF746/NF1/CSF3/GRN/PRKCI/ARRB2/ITGB2/RILPL1/NTRK1/FIS1/BCL2/MEF2C/F2R/TP53BP2/CEBPB/BCL2L1/TYRO3/CRLF1/NTF4/CX3CR1/NAE1/EIF4G1/PRKN                                                                                                                   |
| Biological Process | GO:0001942 | hair follicle development               | 14/2279 | 87/18866  | 0.1611988 | 0.5011615 | 0.4534687 | 14 | TNF/KRT17/RBPJ/HDAC1/CDH3/MYO5A/NF1/NUMA1/BCL2/NOTCH1/TGM3/RELA/INHBA/ERCC2                                                                                                                                                                                                                                                                                                          |
| Biological Process | GO:0006836 | neurotransmitter transport              | 33/2279 | 229/18866 | 0.1614918 | 0.5017442 | 0.453996  | 33 | SV2C/RAP1B/GIT1/DDC/SYN3/PTPRN2/PPFIA1/APBA2/PRKCB/MCTP2/NF1/NRXN1/VPS18/SYN2/SLC1A2/CTBP2/ITGB3/CHRM2/SLC1A6/NRXN2/PER2/SYNGR3/SLC1A3/RPH3A/P2RX1/DNM1L/MEF2C/SYT17/CACNA1B/SLC29A1/FLOT1/DTNBP1/PRKN                                                                                                                                                                               |
| Biological Process | GO:0050807 | regulation of synapse organization      | 33/2279 | 229/18866 | 0.1614918 | 0.5017442 | 0.453996  | 33 | DCTN1/NRP2/SSH1/IL10/ZMYND8/COLQ/TNF/EPHB3/SEMA4A/ITSN1/DISC1/BAIAP2/ZDHHC2/APP/SEMA4D/NRXN1/GHRL/SIPA1L1/YWHAZ/NTRK1/DNM3/DNM1L/MEF2C/UBE3A/NEED4/ARHGFE15/CYFIP1/SLIT1/CUX2/EIF4G1/DBNL/LRFN2/NECTIN1                                                                                                                                                                              |
| Biological Process | GO:0034620 | cellular response to unfolded protein   | 22/2279 | 146/18866 | 0.1617634 | 0.5024236 | 0.4546107 | 22 | DCTN1/CALR/ERN1/PIK3R1/AMFR/MBTPS1/RHBDD2/NCK2/YIF1A/EDEM1/DERL2/ZBTB17/PDIA5/CLGN/COP55/CREB3L2/NFE2L2/ADD1/KLHDC3/SEC31A/ACADVL/PRKN                                                                                                                                                                                                                                               |
| Biological Process | GO:0006486 | protein glycosylation                   | 36/2279 | 252/18866 | 0.1620832 | 0.5030882 | 0.455212  | 36 | FUT4/GALNT2/FUT7/RPN1/XXYLT1/SLC35C2/MGAT5/ST6GALNAC1/GALNT12/MGAT4A/MGAT3/MUC12/ASGR2/GXYLT2/B4GALT7/POMT2/MUC20/B3GNT5/ST6GAL1/ST8SIA6/ST3GAL4/TET2/B4GALT3/PMM2/NPC1/GALNT9/FUT11/GCNT2/GFPPT2/LMF1/ALG11/MAN1C1/DPAGT1/ST3GAL2/B3GNT2/B4GAT1                                                                                                                                     |

|                    |            |                                                        |         |           |           |           |           |    |                                                                                                                                                                                                                                                 |
|--------------------|------------|--------------------------------------------------------|---------|-----------|-----------|-----------|-----------|----|-------------------------------------------------------------------------------------------------------------------------------------------------------------------------------------------------------------------------------------------------|
| Biological Process | GO:0043413 | macromolecule glycosylation                            | 36/2279 | 252/18866 | 0.1620832 | 0.5030882 | 0.455212  | 36 | FUT4/GALNT2/FUT7/RPN1/XXYLT1/SLC35C2/MGAT5/ST6GALNAC1/GALNT12/MGAT4A/MGAT3/MUC12/ASGR2/GXYLT2/B4GALT7/POMT2/MUC20/B3GNT5/ST6GAL1/ST8SIA6/ST3GAL4/TET2/B4GALT3/PMM2/NPC1/GALNT9/FUT11/GCNT2/GFPT2/LMF1/ALG11/MAN1C1/DPAGT1/ST3GAL2/B3GNT2/B4GAT1 |
| Biological Process | GO:0033138 | positive regulation of peptidyl-serine phosphorylation | 17/2279 | 109/18866 | 0.1621847 | 0.5032386 | 0.4553481 | 17 | RPTOR/ANGPT1/ARRB1/TNF/SMYD3/APP/TGFB1/AXIN1/CSF3/SH2D3C/ARRB2/FNIP2/BCL2/BCAR3/NTF4/LIF/EIF4G1                                                                                                                                                 |
| Biological Process | GO:0035050 | embryonic heart tube development                       | 13/2279 | 80/18866  | 0.1636503 | 0.5041466 | 0.4561697 | 13 | SMAD3/SUFU/GJA5/MICAL2/TGFBR2/DLL1/MIB1/ENG/NOTCH1/MEF2C/TMED2/TEAD2/NODAL                                                                                                                                                                      |
| Biological Process | GO:1901224 | positive regulation of NIK/NF-kappaB signaling         | 13/2279 | 80/18866  | 0.1636503 | 0.5041466 | 0.4561697 | 13 | CALR/CHI3L1/TNF/TRAF2/AGO1/TLR9/APP/ACTN4/ILK/PHB/NOD2/IL18R1/RELA                                                                                                                                                                              |
| Biological Process | GO:0000305 | response to oxygen radical                             | 6/2279  | 31/18866  | 0.163944  | 0.5041466 | 0.4561697 | 6  | MPO/TNF/NFE2L2/GLRX2/TXNRD2/SIRT3                                                                                                                                                                                                               |
| Biological Process | GO:0002828 | regulation of type 2 immune response                   | 6/2279  | 31/18866  | 0.163944  | 0.5041466 | 0.4561697 | 6  | PRKCZ/NLRP3/CCR2/RARA/NOD2/HLX                                                                                                                                                                                                                  |
| Biological Process | GO:0009154 | purine ribonucleotide catabolic process                | 6/2279  | 31/18866  | 0.163944  | 0.5041466 | 0.4561697 | 6  | PDE4D/AMPD3/NUDT3/ACOT7/PDE9A/ACAT1                                                                                                                                                                                                             |
| Biological Process | GO:0043171 | peptide catabolic process                              | 6/2279  | 31/18866  | 0.163944  | 0.5041466 | 0.4561697 | 6  | LNPEP/GGT1/CTSH/ADAMTS13/CPQ/XPNPEP1                                                                                                                                                                                                            |
| Biological Process | GO:0045940 | positive regulation of steroid metabolic process       | 6/2279  | 31/18866  | 0.163944  | 0.5041466 | 0.4561697 | 6  | TNF/ABCG1/POR/AGTR1/SREBF1/PRKAA1                                                                                                                                                                                                               |

|                    |            |                                                                           |         |           |           |           |           |    |                                                                                                          |
|--------------------|------------|---------------------------------------------------------------------------|---------|-----------|-----------|-----------|-----------|----|----------------------------------------------------------------------------------------------------------|
| Biological Process | GO:0051497 | negative regulation of stress fiber assembly                              | 6/2279  | 31/18866  | 0.163944  | 0.5041466 | 0.4561697 | 6  | TACSTD2/ARAP1/PPFIA1/PFN1/MIR138-2/ARHGEF18                                                              |
| Biological Process | GO:0071549 | cellular response to dexamethasone stimulus                               | 6/2279  | 31/18866  | 0.163944  | 0.5041466 | 0.4561697 | 6  | ABCC2/SMYD3/FECH/AQP1/PCK2/FOXO1                                                                         |
| Biological Process | GO:0072538 | T-helper 17 type immune response                                          | 6/2279  | 31/18866  | 0.163944  | 0.5041466 | 0.4561697 | 6  | NLRP3/LOXL3/SMAD7/LY9/ZBTB7B/PHB                                                                         |
| Biological Process | GO:1900181 | negative regulation of protein localization to nucleus                    | 6/2279  | 31/18866  | 0.163944  | 0.5041466 | 0.4561697 | 6  | ANGPT1/SUFU/LILRB4/NF1/CABP1/ILRUN                                                                       |
| Biological Process | GO:1902253 | regulation of intrinsic apoptotic signaling pathway by p53 class mediator | 6/2279  | 31/18866  | 0.163944  | 0.5041466 | 0.4561697 | 6  | RRM2B/ZNF385A/ANKRD2/BCL2/PRKN/MARCHF7                                                                   |
| Biological Process | GO:1902624 | positive regulation of neutrophil migration                               | 6/2279  | 31/18866  | 0.163944  | 0.5041466 | 0.4561697 | 6  | C3AR1/IL1R1/CAMK1D/DAPK2/DNM1L/DYSF                                                                      |
| Biological Process | GO:1904292 | regulation of ERAD pathway                                                | 6/2279  | 31/18866  | 0.163944  | 0.5041466 | 0.4561697 | 6  | UBAC2/EDEM1/DERL2/EDEM2/NFE2L2/SVIP                                                                      |
| Biological Process | GO:0009063 | cellular amino acid catabolic process                                     | 19/2279 | 124/18866 | 0.1643419 | 0.5041466 | 0.4561697 | 19 | ACAD8/HAL/GADL1/HGD/CBS/OGDH/ALDH4A1/ENOSF1/FAH/HIBADH/AGXT/HOGA1/ADO/BCKDHA/MAT1A/HMGCL/CRYM/ACAT1/HNMT |
| Biological Process | GO:0051101 | regulation of DNA binding                                                 | 19/2279 | 124/18866 | 0.1643419 | 0.5041466 | 0.4561697 | 19 | PPARG/TNKS/SKI/HIPK2/TAF10/CPNE1/PAX7/TGFB1/RSF1/ZNF462/PER2/RB1/CDCA5/SP100/BCL3/ERCC2/LIF/PRKN/ILRUN   |

|                    |            |                                                  |        |          |           |           |           |   |                               |
|--------------------|------------|--------------------------------------------------|--------|----------|-----------|-----------|-----------|---|-------------------------------|
| Biological Process | GO:0006677 | glycosylceramide metabolic process               | 4/2279 | 18/18866 | 0.1645467 | 0.5041466 | 0.4561697 | 4 | GALC/B4GALT3/FA2H/PRKAA1      |
| Biological Process | GO:0009070 | serine family amino acid biosynthetic process    | 4/2279 | 18/18866 | 0.1645467 | 0.5041466 | 0.4561697 | 4 | GGT1/CBS/AGXT/MTHFD1          |
| Biological Process | GO:0010612 | regulation of cardiac muscle adaptation          | 4/2279 | 18/18866 | 0.1645467 | 0.5041466 | 0.4561697 | 4 | SMAD3/MIR199A1/MIR199A2/FOXO1 |
| Biological Process | GO:0010832 | negative regulation of myotube differentiation   | 4/2279 | 18/18866 | 0.1645467 | 0.5041466 | 0.4561697 | 4 | HDAC4/ANKRD2/NOTCH1/CEACAM5   |
| Biological Process | GO:0031468 | nuclear envelope reassembly                      | 4/2279 | 18/18866 | 0.1645467 | 0.5041466 | 0.4561697 | 4 | PPP2R1A/UBXN2A/ANKLE2/BANF1   |
| Biological Process | GO:0032656 | regulation of interleukin-13 production          | 4/2279 | 18/18866 | 0.1645467 | 0.5041466 | 0.4561697 | 4 | PRKCZ/NLRP3/TNFRSF21/RARA     |
| Biological Process | GO:0032740 | positive regulation of interleukin-17 production | 4/2279 | 18/18866 | 0.1645467 | 0.5041466 | 0.4561697 | 4 | LY9/TGFB1/SLC7A5/NOD2         |
| Biological Process | GO:0034433 | steroid esterification                           | 4/2279 | 18/18866 | 0.1645467 | 0.5041466 | 0.4561697 | 4 | ABCG1/MIR27A/AGTR1/ACAT1      |
| Biological Process | GO:0034434 | sterol esterification                            | 4/2279 | 18/18866 | 0.1645467 | 0.5041466 | 0.4561697 | 4 | ABCG1/MIR27A/AGTR1/ACAT1      |

|                    |            |                                                |        |          |           |           |           |   |                              |
|--------------------|------------|------------------------------------------------|--------|----------|-----------|-----------|-----------|---|------------------------------|
| Biological Process | GO:0034435 | cholesterol esterification                     | 4/2279 | 18/18866 | 0.1645467 | 0.5041466 | 0.4561697 | 4 | ABCG1/MIR27A/AGTR1/ACAT1     |
| Biological Process | GO:0035994 | response to muscle stretch                     | 4/2279 | 18/18866 | 0.1645467 | 0.5041466 | 0.4561697 | 4 | TTN/SLC8A1/ANKRD1/RELA       |
| Biological Process | GO:0036035 | osteoclast development                         | 4/2279 | 18/18866 | 0.1645467 | 0.5041466 | 0.4561697 | 4 | FOXP1/LRRK1/LTF/FAM20C       |
| Biological Process | GO:0043652 | engulfment of apoptotic cell                   | 4/2279 | 18/18866 | 0.1645467 | 0.5041466 | 0.4561697 | 4 | RHOH/RHOG/THBS1/RHOBTB2      |
| Biological Process | GO:0044872 | lipoprotein localization                       | 4/2279 | 18/18866 | 0.1645467 | 0.5041466 | 0.4561697 | 4 | PPARG/MIA3/PRKCB/ZDHHC17     |
| Biological Process | GO:0045721 | negative regulation of gluconeogenesis         | 4/2279 | 18/18866 | 0.1645467 | 0.5041466 | 0.4561697 | 4 | MAEA/C1QTNF3/PGP/SOGA1       |
| Biological Process | GO:0048339 | paraxial mesoderm development                  | 4/2279 | 18/18866 | 0.1645467 | 0.5041466 | 0.4561697 | 4 | SMAD3/WNT11/FGFR1/TEAD2      |
| Biological Process | GO:0051895 | negative regulation of focal adhesion assembly | 4/2279 | 18/18866 | 0.1645467 | 0.5041466 | 0.4561697 | 4 | ITGB1BP1/DUSP22/THBS1/CORO1C |
| Biological Process | GO:0071371 | cellular response to gonadotropin stimulus     | 4/2279 | 18/18866 | 0.1645467 | 0.5041466 | 0.4561697 | 4 | POR/NOTCH1/HMGCS1/INHBA      |



|                    |            |                                                                      |         |           |           |           |           |    |                                                                                                                                               |
|--------------------|------------|----------------------------------------------------------------------|---------|-----------|-----------|-----------|-----------|----|-----------------------------------------------------------------------------------------------------------------------------------------------|
| Biological Process | GO:0090036 | regulation of protein kinase C signaling                             | 4/2279  | 18/18866  | 0.1645467 | 0.5041466 | 0.4561697 | 4  | WNT11/SPHK2/DGKD/MYADM                                                                                                                        |
| Biological Process | GO:0150118 | negative regulation of cell-substrate junction organization          | 4/2279  | 18/18866  | 0.1645467 | 0.5041466 | 0.4561697 | 4  | ITGB1BP1/DUSP22/THBS1/CORO1C                                                                                                                  |
| Biological Process | GO:1903242 | regulation of cardiac muscle hypertrophy in response to stress       | 4/2279  | 18/18866  | 0.1645467 | 0.5041466 | 0.4561697 | 4  | SMAD3/MIR199A1/MIR199A2/FOXO1                                                                                                                 |
| Biological Process | GO:2000369 | regulation of clathrin-dependent endocytosis                         | 4/2279  | 18/18866  | 0.1645467 | 0.5041466 | 0.4561697 | 4  | AAK1/DNM2/WASL/DGKD                                                                                                                           |
| Biological Process | GO:2001185 | regulation of CD8-positive, alpha-beta T cell activation             | 4/2279  | 18/18866  | 0.1645467 | 0.5041466 | 0.4561697 | 4  | RUNX1/ZBTB7B/RUNX3/VSIR                                                                                                                       |
| Biological Process | GO:0060840 | artery development                                                   | 16/2279 | 102/18866 | 0.1653926 | 0.5054247 | 0.4573262 | 16 | LTBP1/MIR143/MIR145/MYLK/DNM2/SUFU/GJA5/NDST1/RBPJ/SMAD7/WNT11/ZMIZ1/NF1/ENG/NOTCH1/PDGFRB                                                    |
| Biological Process | GO:1903076 | regulation of protein localization to plasma membrane                | 16/2279 | 102/18866 | 0.1653926 | 0.5054247 | 0.4573262 | 16 | PIK3R1/RHOG/TNF/ZDHHC2/MRAP/AKAP5/ZDHHC7/PPFIA1/TGFB1/PRKCH/NUMB/CSK/PRKCI/PRKCE/BCL2L1/EZR                                                   |
| Biological Process | GO:2000060 | positive regulation of ubiquitin-dependent protein catabolic process | 16/2279 | 102/18866 | 0.1653926 | 0.5054247 | 0.4573262 | 16 | RNF144A/FZR1/RNF19A/CSNK1D/CBFA2T3/DISC1/CLU/SMAD7/SMURF1/AXIN1/CSNK1E/NFE2L2/RNF144B/RNF14/TRIB1/PRKN                                        |
| Biological Process | GO:0016125 | sterol metabolic process                                             | 25/2279 | 169/18866 | 0.1656579 | 0.5054247 | 0.4573262 | 25 | PRKAG2/OSBPL5/RXRA/IDI1/LIPC/MBTPS1/ABCG1/HDLBP/AKR1D1/APP/FDX1/DGKQ/POR/ABCA1/GNB3/ACACB/CAT/NPC1/ACACA/LMF1/HMGCS1/SCD/SREBF1/ACADVL/PRKAA1 |

|                    |            |                                                                      |         |           |           |           |           |    |                                                                                                                                                                                                                                             |
|--------------------|------------|----------------------------------------------------------------------|---------|-----------|-----------|-----------|-----------|----|---------------------------------------------------------------------------------------------------------------------------------------------------------------------------------------------------------------------------------------------|
| Biological Process | GO:0062013 | positive regulation of small molecule metabolic process              | 23/2279 | 154/18866 | 0.165847  | 0.5054247 | 0.4573262 | 23 | RCVRN/ENO1/PPARG/PFKFB4/GPLD1/TNF/ABCG1/COMT/APP/P2RY6/RDH10/HRH1/POR/DYRK2/NR1H2/PDGFB/ESRRB/PRKCE/FOXO1/SREBF1/CPT1A/PFKFB3/PRKAA1                                                                                                        |
| Biological Process | GO:0006487 | protein N-linked glycosylation                                       | 12/2279 | 73/18866  | 0.1658771 | 0.5054247 | 0.4573262 | 12 | RPN1/MGAT5/MGAT4A/MGAT3/ASGR2/B4GALT7/ST6GAL1/PMM2/GFPT2/ALG11/MAN1C1/DPAAGT1                                                                                                                                                               |
| Biological Process | GO:0010517 | regulation of phospholipase activity                                 | 12/2279 | 73/18866  | 0.1658771 | 0.5054247 | 0.4573262 | 12 | PRKCZ/CCL5/FLT1/P2RY6/FGFR1/PHB/LPAR2/S1PR4/AGTR1/PDGFRB/PLCG1/NTF4                                                                                                                                                                         |
| Biological Process | GO:0051155 | positive regulation of striated muscle cell differentiation          | 12/2279 | 73/18866  | 0.1658771 | 0.5054247 | 0.4573262 | 12 | EHD1/MAML1/MIR199A1/NFATC2/RBP1/TGFB1/ARRB2/BCL2/MIR199A2/MEF2C/FLOT1/SCGB3A1                                                                                                                                                               |
| Biological Process | GO:1903747 | regulation of establishment of protein localization to mitochondrion | 12/2279 | 73/18866  | 0.1658771 | 0.5054247 | 0.4573262 | 12 | TFDP1/YWHAH/USP36/ABLIM3/UBE2J2/YWHAZ/BCL2/TP53BP2/SREBF1/YWHAQ/PRKAA1/PRKN                                                                                                                                                                 |
| Biological Process | GO:0051402 | neuron apoptotic process                                             | 35/2279 | 245/18866 | 0.1660226 | 0.5054247 | 0.4573262 | 35 | HDAC4/CTSZ/IL10/MYB/ANGPT1/SRPK2/ARRB1/TNF/HIPK2/ITSN1/UNC5B/APP/ILK/TNFRSF21/SYNGAP1/NF1/GRN/PRKCI/ARRB2/NTRK1/FIS1/RB1/BCL2/MEF2C/F2R/ATN1/CEBPB/BC<br>L2L1/TYRO3/CRLF1/NTF4/CX3CR1/NAE1/FADD/PRKN                                        |
| Biological Process | GO:0015850 | organic hydroxy compound transport                                   | 38/2279 | 268/18866 | 0.166068  | 0.5054247 | 0.4573262 | 38 | OSBPL5/RXRA/PPARG/SLC51A/SLC16A3/SLC10A1/MYB/LIPC/ABCG1/ABCC2/PLTP/ATP8B1/MIR27A/OSBPL6/CLU/RALBP1/NISCH/AQP1/NR1H2/ITGB3/GHRL/ABCA1/NCOA1/OSBPL10/<br>ABCC3/NPC1/MFSD10/SLC16A1/AQP3/P2RX1/SYT17/AGTR1/NCOA2/GRAMD1A/DTNBP1/AQP9/GRK2/PRKN |
| Biological Process | GO:0009247 | glycolipid biosynthetic process                                      | 11/2279 | 66/18866  | 0.1677807 | 0.5054247 | 0.4573262 | 11 | PIGL/PIGU/PIGN/B3GNT5/ST8SIA6/ST3GAL4/B4GALT3/PIGQ/FA2H/ST3GAL2/PRKAA1                                                                                                                                                                      |
| Biological Process | GO:0016445 | somatic diversification of immunoglobulins                           | 11/2279 | 66/18866  | 0.1677807 | 0.5054247 | 0.4573262 | 11 | IL10/UNG/TGFB1/PTPRC/TCF3/TP53BP1/CTNBL1/ERCC1/TNFSF13/PAXIP1/NSD2                                                                                                                                                                          |

|                    |            |                                                                                      |         |          |           |           |           |    |                                                                  |
|--------------------|------------|--------------------------------------------------------------------------------------|---------|----------|-----------|-----------|-----------|----|------------------------------------------------------------------|
| Biological Process | GO:0045669 | positive regulation of osteoblast differentiation                                    | 11/2279 | 66/18866 | 0.1677807 | 0.5054247 | 0.4573262 | 11 | CEBPD/ILK/BMP1B/RUNX2/IL6R/MEF2C/NPPC/LTF/CEBPB/FAM20C/CCN4      |
| Biological Process | GO:0046365 | monosaccharide catabolic process                                                     | 11/2279 | 66/18866 | 0.1677807 | 0.5054247 | 0.4573262 | 11 | FUT4/FOXK1/ENO1/FUT7/HK1/ADPGK/PGAM1/GLYCTK/ENO3/HK2/PKM         |
| Biological Process | GO:1905818 | regulation of chromosome separation                                                  | 11/2279 | 66/18866 | 0.1677807 | 0.5054247 | 0.4573262 | 11 | MAD1L1/NSMCE2/CUL3/CDC16/TACC3/NUMA1/NEK6/RB1/ANAPC7/HECW2/PCID2 |
| Biological Process | GO:0019433 | triglyceride catabolic process                                                       | 7/2279  | 38/18866 | 0.168034  | 0.5054247 | 0.4573262 | 7  | PNPLA2/SORL1/MGLL/LIPC/GPLD1/FABP6/ABHD5                         |
| Biological Process | GO:0030224 | monocyte differentiation                                                             | 7/2279  | 38/18866 | 0.168034  | 0.5054247 | 0.4573262 | 7  | FOXP1/PPARG/INPP5D/CSF1R/MYH9/SP3/MEF2C                          |
| Biological Process | GO:0032689 | negative regulation of interferon-gamma production                                   | 7/2279  | 38/18866 | 0.168034  | 0.5054247 | 0.4573262 | 7  | IL10/MIR24-2/RARA/PGLYRP1/CD96/INHBA/VSIR                        |
| Biological Process | GO:0035872 | nucleotide-binding domain, leucine rich repeat containing receptor signaling pathway | 7/2279  | 38/18866 | 0.168034  | 0.5054247 | 0.4573262 | 7  | MAP2K6/TNFAIP3/UBE2V1/IRAK2/NOD2/CYLD/RELA                       |
| Biological Process | GO:0044003 | modulation by symbiont of host process                                               | 7/2279  | 38/18866 | 0.168034  | 0.5054247 | 0.4573262 | 7  | RXRA/ULK1/HIPK2/PABPN1/TNIP1/BCL2L1/CPSF4                        |
| Biological Process | GO:0048009 | insulin-like growth factor receptor signaling pathway                                | 7/2279  | 38/18866 | 0.168034  | 0.5054247 | 0.4573262 | 7  | PIK3R1/IGF1R/CDH3/CRIM1/PLCB1/TSC2/MYORG                         |

|                    |            |                                                                |         |           |           |           |           |    |                                                                                                                                                                                                                                                                                                                                                                                                                                   |
|--------------------|------------|----------------------------------------------------------------|---------|-----------|-----------|-----------|-----------|----|-----------------------------------------------------------------------------------------------------------------------------------------------------------------------------------------------------------------------------------------------------------------------------------------------------------------------------------------------------------------------------------------------------------------------------------|
| Biological Process | GO:0051567 | histone H3-K9 methylation                                      | 7/2279  | 38/18866  | 0.168034  | 0.5054247 | 0.4573262 | 7  | MYB/EHMT2/KDM4C/PRDM16/DNMT1/PIH1D1/MECOM                                                                                                                                                                                                                                                                                                                                                                                         |
| Biological Process | GO:0090224 | regulation of spindle organization                             | 7/2279  | 38/18866  | 0.168034  | 0.5054247 | 0.4573262 | 7  | DCTN1/RAE1/RCC1/DYNC1H1/TACC3/NUMA1/SPAG5                                                                                                                                                                                                                                                                                                                                                                                         |
| Biological Process | GO:1901186 | positive regulation of ERBB signaling pathway                  | 7/2279  | 38/18866  | 0.168034  | 0.5054247 | 0.4573262 | 7  | TGFA/DOK1/RTN4/ARAP1/RBPJ/PDE6H/DGKD                                                                                                                                                                                                                                                                                                                                                                                              |
| Biological Process | GO:1903131 | mononuclear cell differentiation                               | 7/2279  | 38/18866  | 0.168034  | 0.5054247 | 0.4573262 | 7  | FOXP1/PPARG/INPP5D/CSF1R/MYH9/SP3/MEF2C                                                                                                                                                                                                                                                                                                                                                                                           |
| Biological Process | GO:2000144 | positive regulation of DNA-templated transcription, initiation | 7/2279  | 38/18866  | 0.168034  | 0.5054247 | 0.4573262 | 7  | CREB1/HNF1A/MED13/SUB1/ERCC1/XPA/PAXIP1                                                                                                                                                                                                                                                                                                                                                                                           |
| Biological Process | GO:2000403 | positive regulation of lymphocyte migration                    | 7/2279  | 38/18866  | 0.168034  | 0.5054247 | 0.4573262 | 7  | CCR2/CCL5/APP/DOCK8/CCL20/CCL27/FADD                                                                                                                                                                                                                                                                                                                                                                                              |
| Biological Process | GO:0097711 | ciliary basal body-plasma membrane docking                     | 15/2279 | 95/18866  | 0.1685764 | 0.5054247 | 0.4573262 | 15 | DCTN1/CSNK1D/NDE1/DYNC1H1/TUBB4B/CEP135/CEP164/DCTN2/CEP78/CSNK1E/PPP2R1A/TUBA4A/SDCCAG8/CEP72/NPHP4                                                                                                                                                                                                                                                                                                                              |
| Biological Process | GO:1901987 | regulation of cell cycle phase transition                      | 66/2279 | 486/18866 | 0.1686614 | 0.5054247 | 0.4573262 | 66 | TRIM39/RPTOR/BLM/BRD4/DCTN1/FZR1/TFDP1/MAD1L1/CSNK1D/FOXN3/NDE1/PRMT2/HUS1/NSMCE2/DYNC1H1/FBXO7/E2F7/CUL3/CTDSPL/PCBP4/TUBB4B/CEP135/RIPK1/APP/PTPN6/NACC2/ZNF385A/CDC16/CDC25A/ARID3A/CEP164/OVOL1/DCTN2/TMOD3/CEP78/CSNK1E/C10orf99/PSMF1/PPP2R1A/GFI1B/PLCB1/TUBA4A/TAOK3/SDCCAG8/ZFYVE19/MIR138-2/NEK6/CLSPN/RB1/BCL2/PSMB7/CDCA5/CHEK2/ANAPC7/HECW2/CDC14A/PLRG1/CEP72/ERCC2/NAE1/EIF4G1/PSMD13/PCID2/PAXIP1/ABRAXAS1/BABAM2 |
| Biological Process | GO:0000185 | activation of MAPKKK activity                                  | 3/2279  | 12/18866  | 0.1690816 | 0.5054247 | 0.4573262 | 3  | KSR1/TNF/GADD45G                                                                                                                                                                                                                                                                                                                                                                                                                  |

|                    |            |                                                                              |        |          |           |           |           |   |                        |
|--------------------|------------|------------------------------------------------------------------------------|--------|----------|-----------|-----------|-----------|---|------------------------|
| Biological Process | GO:0001765 | membrane raft assembly                                                       | 3/2279 | 12/18866 | 0.1690816 | 0.5054247 | 0.4573262 | 3 | PACSIN2/MIR138-2/FLOT1 |
| Biological Process | GO:0001778 | plasma membrane repair                                                       | 3/2279 | 12/18866 | 0.1690816 | 0.5054247 | 0.4573262 | 3 | ANXA6/MYH9/DYSF        |
| Biological Process | GO:0001867 | complement activation, lectin pathway                                        | 3/2279 | 12/18866 | 0.1690816 | 0.5054247 | 0.4573262 | 3 | MFAP4/MASP1/FCN1       |
| Biological Process | GO:0002002 | regulation of angiotensin levels in blood                                    | 3/2279 | 12/18866 | 0.1690816 | 0.5054247 | 0.4573262 | 3 | CTSZ/CTSG/AOPEP        |
| Biological Process | GO:0002003 | angiotensin maturation                                                       | 3/2279 | 12/18866 | 0.1690816 | 0.5054247 | 0.4573262 | 3 | CTSZ/CTSG/AOPEP        |
| Biological Process | GO:0002923 | regulation of humoral immune response mediated by circulating immunoglobulin | 3/2279 | 12/18866 | 0.1690816 | 0.5054247 | 0.4573262 | 3 | TNF/PTPN6/PTPRC        |
| Biological Process | GO:0006002 | fructose 6-phosphate metabolic process                                       | 3/2279 | 12/18866 | 0.1690816 | 0.5054247 | 0.4573262 | 3 | HK1/HK2/GFPT2          |
| Biological Process | GO:0006069 | ethanol oxidation                                                            | 3/2279 | 12/18866 | 0.1690816 | 0.5054247 | 0.4573262 | 3 | ALDH2/ACSS1/ACSS2      |
| Biological Process | GO:0006465 | signal peptide processing                                                    | 3/2279 | 12/18866 | 0.1690816 | 0.5054247 | 0.4573262 | 3 | HM13/CLN5/SPCS1        |

|                    |            |                                                  |        |          |           |           |           |   |                      |
|--------------------|------------|--------------------------------------------------|--------|----------|-----------|-----------|-----------|---|----------------------|
| Biological Process | GO:0006534 | cysteine metabolic process                       | 3/2279 | 12/18866 | 0.1690816 | 0.5054247 | 0.4573262 | 3 | GGT1/CBS/AGXT        |
| Biological Process | GO:0008298 | intracellular mRNA localization                  | 3/2279 | 12/18866 | 0.1690816 | 0.5054247 | 0.4573262 | 3 | EXOSC2/ZNF385A/PCID2 |
| Biological Process | GO:0008343 | adult feeding behavior                           | 3/2279 | 12/18866 | 0.1690816 | 0.5054247 | 0.4573262 | 3 | GHRL/NPY/PRLHR       |
| Biological Process | GO:0009642 | response to light intensity                      | 3/2279 | 12/18866 | 0.1690816 | 0.5054247 | 0.4573262 | 3 | GNAT2/CAT/HMGCS1     |
| Biological Process | GO:0021670 | lateral ventricle development                    | 3/2279 | 12/18866 | 0.1690816 | 0.5054247 | 0.4573262 | 3 | AQP1/NUMB/TSKU       |
| Biological Process | GO:0032736 | positive regulation of interleukin-13 production | 3/2279 | 12/18866 | 0.1690816 | 0.5054247 | 0.4573262 | 3 | PRKCZ/NLRP3/RARA     |
| Biological Process | GO:0032957 | inositol trisphosphate metabolic process         | 3/2279 | 12/18866 | 0.1690816 | 0.5054247 | 0.4573262 | 3 | ITPKB/P2RY6/HRH1     |
| Biological Process | GO:0033004 | negative regulation of mast cell activation      | 3/2279 | 12/18866 | 0.1690816 | 0.5054247 | 0.4573262 | 3 | CD84/FER/CNR2        |
| Biological Process | GO:0034333 | adherens junction assembly                       | 3/2279 | 12/18866 | 0.1690816 | 0.5054247 | 0.4573262 | 3 | TBCD/SMAD7/JAM3      |

|                    |            |                                                                    |        |          |           |           |           |   |                    |
|--------------------|------------|--------------------------------------------------------------------|--------|----------|-----------|-----------|-----------|---|--------------------|
| Biological Process | GO:0035630 | bone mineralization involved in bone maturation                    | 3/2279 | 12/18866 | 0.1690816 | 0.5054247 | 0.4573262 | 3 | LTF/ANO6/RFLNA     |
| Biological Process | GO:0035739 | CD4-positive, alpha-beta T cell proliferation                      | 3/2279 | 12/18866 | 0.1690816 | 0.5054247 | 0.4573262 | 3 | CD55/TGFBR2/VSIR   |
| Biological Process | GO:0036005 | response to macrophage colony-stimulating factor                   | 3/2279 | 12/18866 | 0.1690816 | 0.5054247 | 0.4573262 | 3 | CSF1R/DOK1/FER     |
| Biological Process | GO:0036006 | cellular response to macrophage colony-stimulating factor stimulus | 3/2279 | 12/18866 | 0.1690816 | 0.5054247 | 0.4573262 | 3 | CSF1R/DOK1/FER     |
| Biological Process | GO:0042118 | endothelial cell activation                                        | 3/2279 | 12/18866 | 0.1690816 | 0.5054247 | 0.4573262 | 3 | FOXP1/BMPER/HOXA9  |
| Biological Process | GO:0042178 | xenobiotic catabolic process                                       | 3/2279 | 12/18866 | 0.1690816 | 0.5054247 | 0.4573262 | 3 | ACSL1/ABCC2/GSTO1  |
| Biological Process | GO:0042368 | vitamin D biosynthetic process                                     | 3/2279 | 12/18866 | 0.1690816 | 0.5054247 | 0.4573262 | 3 | GFI1/VDR/TNF       |
| Biological Process | GO:0043696 | dedifferentiation                                                  | 3/2279 | 12/18866 | 0.1690816 | 0.5054247 | 0.4573262 | 3 | MIR145/PDGFB/ESRRB |
| Biological Process | GO:0043697 | cell dedifferentiation                                             | 3/2279 | 12/18866 | 0.1690816 | 0.5054247 | 0.4573262 | 3 | MIR145/PDGFB/ESRRB |

|                    |            |                                                                         |        |          |           |           |           |   |                        |
|--------------------|------------|-------------------------------------------------------------------------|--------|----------|-----------|-----------|-----------|---|------------------------|
| Biological Process | GO:0044090 | positive regulation of vacuole organization                             | 3/2279 | 12/18866 | 0.1690816 | 0.5054247 | 0.4573262 | 3 | ULK1/PIP4K2A/GRN       |
| Biological Process | GO:0045117 | azole transmembrane transport                                           | 3/2279 | 12/18866 | 0.1690816 | 0.5054247 | 0.4573262 | 3 | SLC15A4/SLC44A4/SLC7A1 |
| Biological Process | GO:0046322 | negative regulation of fatty acid oxidation                             | 3/2279 | 12/18866 | 0.1690816 | 0.5054247 | 0.4573262 | 3 | MFSD2A/ACACB/ACADVL    |
| Biological Process | GO:0046929 | negative regulation of neurotransmitter secretion                       | 3/2279 | 12/18866 | 0.1690816 | 0.5054247 | 0.4573262 | 3 | RAP1B/NF1/PRKN         |
| Biological Process | GO:0051798 | positive regulation of hair follicle development                        | 3/2279 | 12/18866 | 0.1690816 | 0.5054247 | 0.4573262 | 3 | TNF/KRT17/NUMA1        |
| Biological Process | GO:0060213 | positive regulation of nuclear-transcribed mRNA poly(A) tail shortening | 3/2279 | 12/18866 | 0.1690816 | 0.5054247 | 0.4573262 | 3 | TNRC6B/AGO2/CPEB3      |
| Biological Process | GO:0060670 | branching involved in labyrinthine layer morphogenesis                  | 3/2279 | 12/18866 | 0.1690816 | 0.5054247 | 0.4573262 | 3 | IL10/SPINT2/GRHL2      |
| Biological Process | GO:0060856 | establishment of blood-brain barrier                                    | 3/2279 | 12/18866 | 0.1690816 | 0.5054247 | 0.4573262 | 3 | MFSD2A/ENG/ADGRA2      |
| Biological Process | GO:0061365 | positive regulation of triglyceride lipase activity                     | 3/2279 | 12/18866 | 0.1690816 | 0.5054247 | 0.4573262 | 3 | NR1H2/LMF1/ABHD5       |



|                    |            |                                                                      |        |          |           |           |           |   |                      |
|--------------------|------------|----------------------------------------------------------------------|--------|----------|-----------|-----------|-----------|---|----------------------|
| Biological Process | GO:0070816 | phosphorylation of RNA polymerase II C-terminal domain               | 3/2279 | 12/18866 | 0.1690816 | 0.5054247 | 0.4573262 | 3 | BRD4/CCNH/CDK13      |
| Biological Process | GO:0071888 | macrophage apoptotic process                                         | 3/2279 | 12/18866 | 0.1690816 | 0.5054247 | 0.4573262 | 3 | CCL5/NOD2/MEF2C      |
| Biological Process | GO:0072531 | pyrimidine-containing compound transmembrane transport               | 3/2279 | 12/18866 | 0.1690816 | 0.5054247 | 0.4573262 | 3 | SLC44A4/SLC29A1/AQP9 |
| Biological Process | GO:0072537 | fibroblast activation                                                | 3/2279 | 12/18866 | 0.1690816 | 0.5054247 | 0.4573262 | 3 | RPS6KA1/MYB/PDGFRB   |
| Biological Process | GO:0072584 | caveolin-mediated endocytosis                                        | 3/2279 | 12/18866 | 0.1690816 | 0.5054247 | 0.4573262 | 3 | ITSN1/PACSIN2/MLC1   |
| Biological Process | GO:0099149 | regulation of postsynaptic neurotransmitter receptor internalization | 3/2279 | 12/18866 | 0.1690816 | 0.5054247 | 0.4573262 | 3 | NUMB/ITGB3/GSG1L     |
| Biological Process | GO:1902855 | regulation of non-motile cilium assembly                             | 3/2279 | 12/18866 | 0.1690816 | 0.5054247 | 0.4573262 | 3 | DNM2/CEP135/SEPTIN9  |
| Biological Process | GO:1903909 | regulation of receptor clustering                                    | 3/2279 | 12/18866 | 0.1690816 | 0.5054247 | 0.4573262 | 3 | SSH1/GSN/ZDHHC2      |
| Biological Process | GO:2000561 | regulation of CD4-positive, alpha-beta T cell proliferation          | 3/2279 | 12/18866 | 0.1690816 | 0.5054247 | 0.4573262 | 3 | CD55/TGFBR2/VSIR     |

|                    |            |                                                                      |         |          |           |           |           |    |                                                                    |
|--------------------|------------|----------------------------------------------------------------------|---------|----------|-----------|-----------|-----------|----|--------------------------------------------------------------------|
| Biological Process | GO:2000650 | negative regulation of sodium ion transmembrane transporter activity | 3/2279  | 12/18866 | 0.1690816 | 0.5054247 | 0.4573262 | 3  | PRKCE/NEDD4/HECW2                                                  |
| Biological Process | GO:0050707 | regulation of cytokine secretion                                     | 10/2279 | 59/18866 | 0.1692197 | 0.5054247 | 0.4573262 | 10 | SORL1/IL10/C1QTNF3/CLEC9A/FGR/TNF/TLR9/CLEC5A/CADM1/CCN4           |
| Biological Process | GO:0060043 | regulation of cardiac muscle cell proliferation                      | 10/2279 | 59/18866 | 0.1692197 | 0.5054247 | 0.4573262 | 10 | MIR199A1/VGLL4/TGFBR2/RIPK1/RBPJ/FGFR1/MEIS1/MIR199A2/NOTCH1/MEF2C |
| Biological Process | GO:0098930 | axonal transport                                                     | 10/2279 | 59/18866 | 0.1692197 | 0.5054247 | 0.4573262 | 10 | SPG7/DYNC1H1/CNIH2/KIF5C/KIF1B/MAP1A/AP3D1/FBXW11/NDEL1/DTNBP1     |
| Biological Process | GO:0002715 | regulation of natural killer cell mediated immunity                  | 8/2279  | 45/18866 | 0.1697602 | 0.5059258 | 0.4577797 | 8  | PIK3R6/CD226/HLA-F/NCR1/ARRB2/IL18RAP/CADM1/CD96                   |
| Biological Process | GO:0032365 | intracellular lipid transport                                        | 8/2279  | 45/18866 | 0.1697602 | 0.5059258 | 0.4577797 | 8  | PRKAG2/ABCG1/ABCA1/ACACB/NPC1/SGPP1/ACACA/CPT1A                    |
| Biological Process | GO:0032924 | activin receptor signaling pathway                                   | 8/2279  | 45/18866 | 0.1697602 | 0.5059258 | 0.4577797 | 8  | SKI/SMAD3/TGFBR2/SMAD7/GDF6/ZC3H3/INHBA/NODAL                      |
| Biological Process | GO:0034105 | positive regulation of tissue remodeling                             | 8/2279  | 45/18866 | 0.1697602 | 0.5059258 | 0.4577797 | 8  | DEF8/MIR143/VDR/PRKCA/MIR199A1/TMEM64/PLEKHM1/MIR199A2             |
| Biological Process | GO:0046839 | phospholipid dephosphorylation                                       | 8/2279  | 45/18866 | 0.1697602 | 0.5059258 | 0.4577797 | 8  | SYNJ2/INPP5A/INPP5D/INPP5E/SGPP1/SGPP2/INPP5F/PLPP3                |

|                    |            |                                                          |         |          |           |           |           |    |                                                                                      |
|--------------------|------------|----------------------------------------------------------|---------|----------|-----------|-----------|-----------|----|--------------------------------------------------------------------------------------|
| Biological Process | GO:0055026 | negative regulation of cardiac muscle tissue development | 8/2279  | 45/18866 | 0.1697602 | 0.5059258 | 0.4577797 | 8  | CTDP1/MIR199A1/VGLL4/TGFBR2/DLL1/RIPK1/MEIS1/MIR199A2                                |
| Biological Process | GO:0072583 | clathrin-dependent endocytosis                           | 8/2279  | 45/18866 | 0.1697602 | 0.5059258 | 0.4577797 | 8  | AP2A1/AAK1/DNM2/ITSN1/DLL1/WASL/DGKD/INPP5F                                          |
| Biological Process | GO:0003179 | heart valve morphogenesis                                | 9/2279  | 52/18866 | 0.1699857 | 0.505963  | 0.4578133 | 9  | ZFPM1/GJA5/NFATC1/TGFBR2/TGFB1/RB1/NOTCH1/MEF2C/SLIT3                                |
| Biological Process | GO:0030514 | negative regulation of BMP signaling pathway             | 9/2279  | 52/18866 | 0.1699857 | 0.505963  | 0.4578133 | 9  | SORL1/SKI/HIPK2/SMAD7/SMURF1/BMPER/NOTCH1/HTRA3/SPART                                |
| Biological Process | GO:0051496 | positive regulation of stress fiber assembly             | 9/2279  | 52/18866 | 0.1699857 | 0.505963  | 0.4578133 | 9  | ARHGEF10/ITGB1BP1/SMAD3/SH3PXD2B/SYNPO2L/PXN/WNT11/ARHGEF10L/ARHGEF15                |
| Biological Process | GO:0090329 | regulation of DNA-dependent DNA replication              | 9/2279  | 52/18866 | 0.1699857 | 0.505963  | 0.4578133 | 9  | BLM/BRCA2/E2F7/WRNIP1/FGFR1/SMARCAL1/CHEK2/KAT7/FBH1                                 |
| Biological Process | GO:0002028 | regulation of sodium ion transport                       | 14/2279 | 88/18866 | 0.1717054 | 0.5106019 | 0.4620107 | 14 | FXVD2/YWHAH/FXYD1/SLC8A1/DNM2/TESC/ACTN4/SNTA1/PER1/PRKCE/NEDD4/HECW2/SPTBN4/FGF14   |
| Biological Process | GO:0046889 | positive regulation of lipid biosynthetic process        | 14/2279 | 88/18866 | 0.1717054 | 0.5106019 | 0.4620107 | 14 | CREB1/MFSD2A/GPLD1/TNF/ABCG1/FPR2/TNFRSF1A/SPHK2/RDH10/POR/NR1H2/SREBF1/SIRT3/PRKAA1 |
| Biological Process | GO:0050818 | regulation of coagulation                                | 14/2279 | 88/18866 | 0.1717054 | 0.5106019 | 0.4620107 | 14 | PLAU/CD9/PRKCA/UBASH3B/SERPINB2/THBS1/F12/BLK/PDGFB/NFE2L2/CPB2/F2R/ANO6/ADTRP       |

|                    |            |                                                                                 |         |           |           |           |           |    |                                                                                                                                                                                                                                                                                                                                                                                             |
|--------------------|------------|---------------------------------------------------------------------------------|---------|-----------|-----------|-----------|-----------|----|---------------------------------------------------------------------------------------------------------------------------------------------------------------------------------------------------------------------------------------------------------------------------------------------------------------------------------------------------------------------------------------------|
| Biological Process | GO:0061013 | regulation of mRNA catabolic process                                            | 30/2279 | 208/18866 | 0.1736655 | 0.5162689 | 0.4671384 | 30 | PRR5L/EXOSC2/SLC11A1/TNRC6B/PABPC4/TNPO1/PRKCA/LARP1/ZC3H12D/PKP1/PCBP4/SAMD4A/AGO2/CPEB3/IGF2BP3/PSMF1/FTO/NBAS/YWHAZ/PSMB7/PAIP1/TNFSF13/SECISBP2/SYNERIP/EIF4G1/PSMD13/PCID2/TBRG4/TENT5C/TENT5A                                                                                                                                                                                         |
| Biological Process | GO:0009411 | response to UV                                                                  | 21/2279 | 140/18866 | 0.1738008 | 0.5163482 | 0.4672101 | 21 | ELANE/MFAP4/BRCA2/PIK3R1/BMF/HUS1/CDC25A/AQP1/CREBBP/CAT/BCL2/RHNO1/NEDD4/ERCC1/CRIP1/RELA/BCL3/POLD3/XPA/ERCC2/PRKAA1                                                                                                                                                                                                                                                                      |
| Biological Process | GO:0072655 | establishment of protein localization to mitochondrion                          | 21/2279 | 140/18866 | 0.1738008 | 0.5163482 | 0.4672101 | 21 | HK1/TFDP1/YWHAH/PAM16/BMF/FBXO7/MIPEP/AIP/USP36/ABLIM3/UBE2J2/HK2/YWHAZ/FIS1/BCL2/TIMM44/TP53BP2/SREBF1/YWHAQ/PRKAA1/PRKN                                                                                                                                                                                                                                                                   |
| Biological Process | GO:1901990 | regulation of mitotic cell cycle phase transition                               | 61/2279 | 448/18866 | 0.1738924 | 0.5164587 | 0.4673102 | 61 | TRIM39/RPTOR/BLM/BRD4/DCTN1/FZR1/TFDP1/MAD1L1/CSNK1D/FOXN3/NDE1/PRMT2/HUS1/NSMCE2/DYNC1H1/FBXO7/E2F7/CUL3/CTDSPL/PCBP4/TUBB4B/CEP135/RIPK1/APP/PTPN6/NACC2/ZNF385A/CDC16/CDC25A/ARID3A/CEP164/DCTN2/TMOD3/CEP78/CSNK1E/PSMF1/PPP2R1A/GFI1B/PLCB1/TUBA4A/TAOK3/SDCCAG8/ZFYVE19/MIR138-2/NEK6/CLSPN/RB1/BCL2/PSMB7/CDC45/CHEK2/ANAPC7/HECW2/CDC14A/PLRG1/CEP72/ERCC2/NAE1/EIF4G1/PSMD13/PCID2 |
| Biological Process | GO:0034766 | negative regulation of ion transmembrane transport                              | 16/2279 | 103/18866 | 0.1751965 | 0.5201694 | 0.4706677 | 16 | KCNE1/THADA/CASQ2/TLR9/BIN1/THBS1/SLC43A2/CAB39/GSTO1/PRKCE/SLC43A1/NEDD4/DYSF/HECW2/YWHAQ/CBARP                                                                                                                                                                                                                                                                                            |
| Biological Process | GO:0003071 | renal system process involved in regulation of systemic arterial blood pressure | 5/2279  | 25/18866  | 0.176726  | 0.5227503 | 0.4730031 | 5  | GJA5/PDGFB/F2R/AGTR1/HSD11B2                                                                                                                                                                                                                                                                                                                                                                |
| Biological Process | GO:0009081 | branched-chain amino acid metabolic process                                     | 5/2279  | 25/18866  | 0.176726  | 0.5227503 | 0.4730031 | 5  | ACAD8/HIBADH/BCKDHA/HMGCL/ACAT1                                                                                                                                                                                                                                                                                                                                                             |
| Biological Process | GO:0032878 | regulation of establishment or maintenance of cell polarity                     | 5/2279  | 25/18866  | 0.176726  | 0.5227503 | 0.4730031 | 5  | GSN/KANK1/RAP1B/DOCK8/CYRIB                                                                                                                                                                                                                                                                                                                                                                 |
| Biological Process | GO:0034162 | toll-like receptor 9 signaling pathway                                          | 5/2279  | 25/18866  | 0.176726  | 0.5227503 | 0.4730031 | 5  | GRAMD4/PIK3AP1/TLR9/RTN4/IRAK2                                                                                                                                                                                                                                                                                                                                                              |

|                    |            |                                                                         |         |          |           |           |           |    |                                                                       |
|--------------------|------------|-------------------------------------------------------------------------|---------|----------|-----------|-----------|-----------|----|-----------------------------------------------------------------------|
| Biological Process | GO:0045109 | intermediate filament organization                                      | 5/2279  | 25/18866 | 0.176726  | 0.5227503 | 0.4730031 | 5  | KRT17/PKP1/NEFM/DNAJB6/GFAP                                           |
| Biological Process | GO:0060148 | positive regulation of posttranscriptional gene silencing               | 5/2279  | 25/18866 | 0.176726  | 0.5227503 | 0.4730031 | 5  | RIPK1/LIMD1/AGO2/TGFB1/EIF4G1                                         |
| Biological Process | GO:0060330 | regulation of response to interferon-gamma                              | 5/2279  | 25/18866 | 0.176726  | 0.5227503 | 0.4730031 | 5  | PPARG/JAK1/NR1H2/NLRC5/PARP9                                          |
| Biological Process | GO:0060334 | regulation of interferon-gamma-mediated signaling pathway               | 5/2279  | 25/18866 | 0.176726  | 0.5227503 | 0.4730031 | 5  | PPARG/JAK1/NR1H2/NLRC5/PARP9                                          |
| Biological Process | GO:0070920 | regulation of production of small RNA involved in gene silencing by RNA | 5/2279  | 25/18866 | 0.176726  | 0.5227503 | 0.4730031 | 5  | NCOR2/TNF/RIPK1/TGFB1/RMRP                                            |
| Biological Process | GO:0071378 | cellular response to growth hormone stimulus                            | 5/2279  | 25/18866 | 0.176726  | 0.5227503 | 0.4730031 | 5  | PIK3R1/STAT5A/PXN/GHRL/MBD5                                           |
| Biological Process | GO:1905564 | positive regulation of vascular endothelial cell proliferation          | 5/2279  | 25/18866 | 0.176726  | 0.5227503 | 0.4730031 | 5  | AKT3/MIR27A/FGFR1/GHRL/PLCG1                                          |
| Biological Process | GO:2000311 | regulation of AMPA receptor activity                                    | 5/2279  | 25/18866 | 0.176726  | 0.5227503 | 0.4730031 | 5  | CNIH2/MAPK8IP2/GSG1L/MEF2C/SHANK2                                     |
| Biological Process | GO:0032024 | positive regulation of insulin secretion                                | 12/2279 | 74/18866 | 0.1776148 | 0.5250524 | 0.4750086 | 12 | NADK/MYRIP/ARRB1/GPLD1/TCF7L2/GIPR/BLK/GHRL/PRKCE/RPH3AL/C2CD2L/SIRT3 |

|                    |            |                                                                                                 |         |           |           |           |           |    |                                                                                                                                                                                                                                                                              |
|--------------------|------------|-------------------------------------------------------------------------------------------------|---------|-----------|-----------|-----------|-----------|----|------------------------------------------------------------------------------------------------------------------------------------------------------------------------------------------------------------------------------------------------------------------------------|
| Biological Process | GO:0046503 | glycerolipid catabolic process                                                                  | 12/2279 | 74/18866  | 0.1776148 | 0.5250524 | 0.475086  | 12 | PNPLA2/PLA2G15/SORL1/MGLL/LIPC/ABHD16A/GPLD1/ABHD16B/FABP6/ABHD5/INPP5F/LYPLA2                                                                                                                                                                                               |
| Biological Process | GO:0042177 | negative regulation of protein catabolic process                                                | 20/2279 | 133/18866 | 0.1779434 | 0.5256523 | 0.4756289 | 20 | TRIM39/TIMP2/IL10/SF3B3/SMAD3/SUFU/HIPK2/UBAC2/MGAT3/SNX3/DERL2/PHB/CLEC16A/PSMF1/MAP1A/DYSF/RELA/BAG5/SVIP/MARCHF7                                                                                                                                                          |
| Biological Process | GO:0090101 | negative regulation of transmembrane receptor protein serine/threonine kinase signaling pathway | 20/2279 | 133/18866 | 0.1779434 | 0.5256523 | 0.4756289 | 20 | LTBP1/SPRED2/SORL1/SKI/SMAD3/LDLRAD4/DNM2/HIPK2/CHST11/TGFBR2/SMAD7/TGFB1/SMURF1/TGFB1I1/BMPER/HTRA4/PRDM16/NOTCH1/HTRA3/SPART                                                                                                                                               |
| Biological Process | GO:0031644 | regulation of nervous system process                                                            | 22/2279 | 148/18866 | 0.1779837 | 0.5256523 | 0.4756289 | 22 | PRKCZ/MGLL/SSH1/IL10/ZMYND8/TNFRSF1B/COMT/BAIAP2/APP/TNFRSF21/DLGAP4/CNIH2/NRXN1/GHRL/SH3GL1/BEGAIN/S1PR2/SHANK2/F2R/NPTX1/CUX2/ACP3                                                                                                                                         |
| Biological Process | GO:0008202 | steroid metabolic process                                                                       | 46/2279 | 332/18866 | 0.1787058 | 0.5276209 | 0.4774102 | 46 | PRKAG2/GFI1/OSBPL5/RXRA/NR1I2/IDI1/DHRS9/LIPC/YWHAH/VDR/AMACR/MBTPS1/TNF/ABCG1/HDLBP/AKR1D1/HSD17B2/COMT/ATP8B1/APP/MIR27A/OSBPL6/FGFR1/FDX1/SULT1A2/DGKQ/SF1/POR/ABCA1/GNB3/ACACB/CAT/ACBD3/ACOX2/NPC1/ACACA/LMF1/AGTR1/ACAT1/HMGCS1/SCD/SREBF1/NR5A2/HSD11B2/ACADVL/PRKAA1 |
| Biological Process | GO:0002548 | monocyte chemotaxis                                                                             | 11/2279 | 67/18866  | 0.1802537 | 0.5313654 | 0.4807983 | 11 | CCR2/CCL5/FPR2/DEFB124/FLT1/CXCL17/CCL20/IL6R/PDGFB/ANO6/CCL22                                                                                                                                                                                                               |
| Biological Process | GO:0007040 | lysosome organization                                                                           | 11/2279 | 67/18866  | 0.1802537 | 0.5313654 | 0.4807983 | 11 | HEXB/LYST/MBTPS1/VPS18/ABCA1/HOOK2/GRN/TPCN2/ARSB/CLN5/ACP3                                                                                                                                                                                                                  |
| Biological Process | GO:0031060 | regulation of histone methylation                                                               | 11/2279 | 67/18866  | 0.1802537 | 0.5313654 | 0.4807983 | 11 | GFI1/BRD4/MYB/PAX7/KDM4C/ZNF335/PHF19/DNMT1/PIH1D1/PAXIP1/NSD3                                                                                                                                                                                                               |
| Biological Process | GO:0036498 | IRE1-mediated unfolded protein response                                                         | 11/2279 | 67/18866  | 0.1802537 | 0.5313654 | 0.4807983 | 11 | DCTN1/ERN1/YIF1A/EDEM1/ZBTB17/PDIA5/COP55/ADD1/KLHDC3/SEC31A/ACADVL                                                                                                                                                                                                          |

|                    |            |                                                |         |           |           |           |           |    |                                                                                                                                                                                              |
|--------------------|------------|------------------------------------------------|---------|-----------|-----------|-----------|-----------|----|----------------------------------------------------------------------------------------------------------------------------------------------------------------------------------------------|
| Biological Process | GO:0080171 | lytic vacuole organization                     | 11/2279 | 67/18866  | 0.1802537 | 0.5313654 | 0.4807983 | 11 | HEXB/LYST/MBTPS1/VPS18/ABCA1/HOOK2/GRN/TPCN2/ARSB/CLN5/ACP3                                                                                                                                  |
| Biological Process | GO:0040029 | regulation of gene expression, epigenetic      | 30/2279 | 209/18866 | 0.1806158 | 0.5322676 | 0.4816146 | 30 | HDAC4/TRIM27/TAF1C/BAZ1B/SERTAD2/POLR2F/PADI2/CDYL/EPC1/ZMIZ1/SPHK2/KMT2D/MTA1/CTBP1/ARID1B/KDM1B/KCNQ1/SMARCD1/ZNF335/PHF19/DNMT1/PCGF3/TAF1D/MORC1/MYO1C/RBM15B/DYDC2/DYDC1/MACROH2A2/H3C1 |
| Biological Process | GO:0061387 | regulation of extent of cell growth            | 17/2279 | 111/18866 | 0.1811654 | 0.5335563 | 0.4827806 | 17 | SEMA6B/CTTN/DNM2/SEMA4A/RTN4/DISC1/SEMA4B/IFRD1/ILK/SEMA4D/CDH4/CDKL3/CYFIP1/TRPV2/NDEL1/DBNL/SPART                                                                                          |
| Biological Process | GO:1903509 | liposaccharide metabolic process               | 17/2279 | 111/18866 | 0.1811654 | 0.5335563 | 0.4827806 | 17 | HEXB/PIGL/PIGU/GPLD1/GALC/AOAH/PIGN/B3GNT5/ST8SIA6/ST3GAL4/B4GALT3/PIGQ/FA2H/ESYT1/CERK/ST3GAL2/PRKAA1                                                                                       |
| Biological Process | GO:0009261 | ribonucleotide catabolic process               | 6/2279  | 32/18866  | 0.1825198 | 0.5338711 | 0.4830655 | 6  | PDE4D/AMPD3/NUDT3/ACOT7/PDE9A/ACAT1                                                                                                                                                          |
| Biological Process | GO:0021591 | ventricular system development                 | 6/2279  | 32/18866  | 0.1825198 | 0.5338711 | 0.4830655 | 6  | RAPGEF2/AQP1/NUMB/TTC21B/CORO1C/TSKU                                                                                                                                                         |
| Biological Process | GO:0032673 | regulation of interleukin-4 production         | 6/2279  | 32/18866  | 0.1825198 | 0.5338711 | 0.4830655 | 6  | PRKCZ/ZFPM1/NLRP3/RARA/SLC7A5/CEBPB                                                                                                                                                          |
| Biological Process | GO:0034694 | response to prostaglandin                      | 6/2279  | 32/18866  | 0.1825198 | 0.5338711 | 0.4830655 | 6  | PPARG/P2RY6/GNG2/ACACA/PRKCE/PRKAA1                                                                                                                                                          |
| Biological Process | GO:0042219 | cellular modified amino acid catabolic process | 6/2279  | 32/18866  | 0.1825198 | 0.5338711 | 0.4830655 | 6  | GGT1/ABHD16A/MTHFS/ALDH4A1/ABHD16B/HOGA1                                                                                                                                                     |

|                    |            |                                                            |         |          |           |           |           |    |                                                              |
|--------------------|------------|------------------------------------------------------------|---------|----------|-----------|-----------|-----------|----|--------------------------------------------------------------|
| Biological Process | GO:0043304 | regulation of mast cell degranulation                      | 6/2279  | 32/18866 | 0.1825198 | 0.5338711 | 0.4830655 | 6  | GAB2/FGR/CD84/SPHK2/FER/BLK                                  |
| Biological Process | GO:0046320 | regulation of fatty acid oxidation                         | 6/2279  | 32/18866 | 0.1825198 | 0.5338711 | 0.4830655 | 6  | PRKAG2/PPARG/MFSD2A/ACACB/CPT1A/ACADVL                       |
| Biological Process | GO:0046949 | fatty-acyl-CoA biosynthetic process                        | 6/2279  | 32/18866 | 0.1825198 | 0.5338711 | 0.4830655 | 6  | ACSL1/ACACA/ACSF3/ACAT1/SCD/SLC25A1                          |
| Biological Process | GO:0070570 | regulation of neuron projection regeneration               | 6/2279  | 32/18866 | 0.1825198 | 0.5338711 | 0.4830655 | 6  | KREMEN1/STK24/GRN/CERS2/NDEL1/INPP5F                         |
| Biological Process | GO:1901889 | negative regulation of cell junction assembly              | 6/2279  | 32/18866 | 0.1825198 | 0.5338711 | 0.4830655 | 6  | ITGB1BP1/TNF/DUSP22/THBS1/CORO1C/SLIT1                       |
| Biological Process | GO:0032515 | negative regulation of phosphoprotein phosphatase activity | 10/2279 | 60/18866 | 0.1825342 | 0.5338711 | 0.4830655 | 10 | LMTK2/MGAT5/PPP1R1B/URI1/CABIN1/TNF/GNAI2/ELFN2/PHACTR2/PTPA |
| Biological Process | GO:0033260 | nuclear DNA replication                                    | 10/2279 | 60/18866 | 0.1825342 | 0.5338711 | 0.4830655 | 10 | POLE/BRCA2/RTEL1/MCM5/POLA2/FGFR1/MCM2/CHEK2/POLD3/POLE4     |
| Biological Process | GO:0044784 | metaphase/anaphase transition of cell cycle                | 10/2279 | 60/18866 | 0.1825342 | 0.5338711 | 0.4830655 | 10 | MAD1L1/NSMCE2/CUL3/CDC16/TACC3/NEK6/RB1/ANAPC7/HECW2/PCID2   |
| Biological Process | GO:0060042 | retina morphogenesis in camera-type eye                    | 10/2279 | 60/18866 | 0.1825342 | 0.5338711 | 0.4830655 | 10 | MFSD2A/CRB1/HIPK2/DLL1/GNAT2/RPGRIP1/ZHX2/SDK2/NRL/CABP4     |



|                    |            |                                                                     |         |           |           |           |           |    |                                                                                                                                                                                                                                                                            |
|--------------------|------------|---------------------------------------------------------------------|---------|-----------|-----------|-----------|-----------|----|----------------------------------------------------------------------------------------------------------------------------------------------------------------------------------------------------------------------------------------------------------------------------|
| Biological Process | GO:1903428 | positive regulation of reactive oxygen species biosynthetic process | 10/2279 | 60/18866  | 0.1825342 | 0.5338711 | 0.4830655 | 10 | HDAC4/SMAD3/DNM2/TNF/RAB27A/NOS1AP/MIR24-2/CLU/HBB/ITGB2                                                                                                                                                                                                                   |
| Biological Process | GO:0055006 | cardiac cell development                                            | 14/2279 | 89/18866  | 0.1825462 | 0.5338711 | 0.4830655 | 14 | CTDP1/MYO18B/TTN/MYH11/AKAP13/MAML1/SLC8A1/MIR199A1/MIR24-2/MIR23A/MIR199A2/NOTCH1/FHL2/PDGFRB                                                                                                                                                                             |
| Biological Process | GO:0050851 | antigen receptor-mediated signaling pathway                         | 45/2279 | 325/18866 | 0.182974  | 0.5338711 | 0.4830655 | 45 | PDE4D/LAT/FOXP1/PIK3CD/LCK/RUNX1/INPP5D/PIK3R1/LAX1/GRAP2/NFATC2/EIF2B5/MNDA/DUSP22/IGHV6-1/CD226/PTPN6/TNFRSF21/KLHL6/PRKCH/PTPRJ/PRKCB/LILRB4/CD79A/BLK/PTPRC/CSK/BCL10/PSMF1/THEMIS2/BCL2/PSMB7/MEF2C/DUSP3/PRAM1/ELF1/CYLD/PLCG1/RELA/FBXW11/EZR/PSMD13/VAV3/FYB1/SLA2 |
| Biological Process | GO:0009311 | oligosaccharide metabolic process                                   | 9/2279  | 53/18866  | 0.184277  | 0.5338711 | 0.4830655 | 9  | FUT4/HEXB/ST6GALNAC1/MGAM/ST8SIA6/ST3GAL4/SLC2A1/MAN2C1/ST3GAL2                                                                                                                                                                                                            |
| Biological Process | GO:0035384 | thioester biosynthetic process                                      | 9/2279  | 53/18866  | 0.184277  | 0.5338711 | 0.4830655 | 9  | ACSL1/ACSS1/ACACB/ACSS2/ACACA/ACSF3/ACAT1/SCD/SLC25A1                                                                                                                                                                                                                      |
| Biological Process | GO:0043124 | negative regulation of I-kappaB kinase/NF-kappaB signaling          | 9/2279  | 53/18866  | 0.184277  | 0.5338711 | 0.4830655 | 9  | TRIM39/RHOH/TNFAIP3/RIPK1/HDAC1/TLE1/TNIP1/PER1/PPM1N                                                                                                                                                                                                                      |
| Biological Process | GO:0045661 | regulation of myoblast differentiation                              | 9/2279  | 53/18866  | 0.184277  | 0.5338711 | 0.4830655 | 9  | TNF/DLL1/ILK/TGFB1/PLCB1/ANKRD2/NOTCH1/CMTM5/MEF2C                                                                                                                                                                                                                         |
| Biological Process | GO:0051703 | intraspecies interaction between organisms                          | 9/2279  | 53/18866  | 0.184277  | 0.5338711 | 0.4830655 | 9  | ATXN1/NRXN1/NRXN2/MAPK8IP2/SHANK2/LTF/CHD8/GRID1/CX3CR1                                                                                                                                                                                                                    |
| Biological Process | GO:0061756 | leukocyte adhesion to vascular endothelial cell                     | 9/2279  | 53/18866  | 0.184277  | 0.5338711 | 0.4830655 | 9  | ELANE/FUT4/FUT7/CCR2/TNF/ETS1/ITGB2/RELA/CX3CR1                                                                                                                                                                                                                            |

|                    |            |                                                                               |         |           |           |           |           |    |                                                                                                                                                                                                                                                                 |
|--------------------|------------|-------------------------------------------------------------------------------|---------|-----------|-----------|-----------|-----------|----|-----------------------------------------------------------------------------------------------------------------------------------------------------------------------------------------------------------------------------------------------------------------|
| Biological Process | GO:0071616 | acyl-CoA biosynthetic process                                                 | 9/2279  | 53/18866  | 0.184277  | 0.5338711 | 0.4830655 | 9  | ACSL1/ACSS1/ACACB/ACSS2/ACACA/ACSF3/ACAT1/SCD/SLC25A1                                                                                                                                                                                                           |
| Biological Process | GO:0050890 | cognition                                                                     | 42/2279 | 302/18866 | 0.1845616 | 0.5338711 | 0.4830655 | 42 | PRKCZ/CREB1/MFSD2A/PPP1R1B/PRKAR1B/AMFR/TNF/SGK1/TANC1/ATP8A1/ATXN1/SLC11A2/MGAT3/COMT/APP/ZNF385A/SYNGAP1/CRHBP/HRH1/NF1/NRXN1/CPEB3/HTT/GMFB/ST3GAL4/MEIS2/NRXN2/PLCB1/MAPK8IP2/NTRK1/MAP1A/MEF2C/SHANK2/CEBPB/CYFIP1/NTAN1/NTF4/CX3CR1/CUX2/SYNPO/PRKN/DOP1B |
| Biological Process | GO:0006270 | DNA replication initiation                                                    | 7/2279  | 39/18866  | 0.1848744 | 0.5338711 | 0.4830655 | 7  | POLE/MCM5/WRNIP1/POLA2/MCM2/KAT7/POLE4                                                                                                                                                                                                                          |
| Biological Process | GO:0009163 | nucleoside biosynthetic process                                               | 7/2279  | 39/18866  | 0.1848744 | 0.5338711 | 0.4830655 | 7  | CDA/TK2/UCK2/GUK1/DHODH/TK1/IMPDH1                                                                                                                                                                                                                              |
| Biological Process | GO:0010737 | protein kinase A signaling                                                    | 7/2279  | 39/18866  | 0.1848744 | 0.5338711 | 0.4830655 | 7  | TTN/PRKAR1B/AIP/AKAP5/MYOM1/EZR/AKAP7                                                                                                                                                                                                                           |
| Biological Process | GO:0034205 | amyloid-beta formation                                                        | 7/2279  | 39/18866  | 0.1848744 | 0.5338711 | 0.4830655 | 7  | SORL1/TNF/ABCG1/BIN1/APP/CLU/RELA                                                                                                                                                                                                                               |
| Biological Process | GO:0046329 | negative regulation of JNK cascade                                            | 7/2279  | 39/18866  | 0.1848744 | 0.5338711 | 0.4830655 | 7  | HIPK3/TAOK3/PER1/DUSP3/CYLD/MECOM/PRKN                                                                                                                                                                                                                          |
| Biological Process | GO:0086091 | regulation of heart rate by cardiac conduction                                | 7/2279  | 39/18866  | 0.1848744 | 0.5338711 | 0.4830655 | 7  | KCNE1/CACNA1C/GJA5/JUP/BIN1/KCNQ1/ANK2                                                                                                                                                                                                                          |
| Biological Process | GO:1902229 | regulation of intrinsic apoptotic signaling pathway in response to DNA damage | 7/2279  | 39/18866  | 0.1848744 | 0.5338711 | 0.4830655 | 7  | NACC2/ZNF385A/CLU/BCL2/BCL2L1/MARCHF7/FBH1                                                                                                                                                                                                                      |

|                    |            |                                                                          |         |           |           |           |           |    |                                                                                                                                                                                                                                                                       |
|--------------------|------------|--------------------------------------------------------------------------|---------|-----------|-----------|-----------|-----------|----|-----------------------------------------------------------------------------------------------------------------------------------------------------------------------------------------------------------------------------------------------------------------------|
| Biological Process | GO:0045581 | negative regulation of T cell differentiation                            | 8/2279  | 46/18866  | 0.1852058 | 0.5338711 | 0.4830655 | 8  | RUNX1/LOXL3/SMAD7/ZBTB7B/ZC3H8/HLX/RUNX3/TMEM131L                                                                                                                                                                                                                     |
| Biological Process | GO:0048066 | developmental pigmentation                                               | 8/2279  | 46/18866  | 0.1852058 | 0.5338711 | 0.4830655 | 8  | ZEB2/RAB27A/MYO5A/GNA11/BCL2/MEF2C/HPS6/AP3D1                                                                                                                                                                                                                         |
| Biological Process | GO:1900744 | regulation of p38MAPK cascade                                            | 8/2279  | 46/18866  | 0.1852058 | 0.5338711 | 0.4830655 | 8  | MAP3K3/PHLPP1/MIR138-2/PER1/GADD45G/GDF6/CYLD/EZR                                                                                                                                                                                                                     |
| Biological Process | GO:1903050 | regulation of proteolysis involved in cellular protein catabolic process | 32/2279 | 225/18866 | 0.1854139 | 0.5338711 | 0.4830655 | 32 | TRIM39/RNF144A/FZR1/RNF19A/CSNK1D/SUFU/HIPK2/CBFA2T3/UBAC2/DISC1/EDEM1/DERL2/CLU/SMAD7/SMURF1/AXIN1/CLEC16A/EDEM2/CSNK1E/PSMF1/NFE2L2/RNF144B/MA<br>P1A/GNA12/UBE3A/RNF14/TRIB1/RNF40/BAG5/SVIP/PRKN/MARCHF7                                                          |
| Biological Process | GO:0044843 | cell cycle G1/S phase transition                                         | 43/2279 | 310/18866 | 0.1859991 | 0.5338711 | 0.4830655 | 43 | TRIM39/RPTOR/GFI1/BRD4/TFDP1/POLE/PRMT2/E2F3/RCC1/FBXO7/E2F7/MCM5/CUL3/POLA2/CTDSPL/PCBP4/RIPK1/PTPN6/NACC2/ZNF385A/CDK14/TAF10/LATS2/CDC25A/ARID3<br>A/MCM2/C10orf99/GFI1B/PLCB1/CCNH/ESRRB/MIR138-2/CCNA1/RB1/BCL2/E2F6/CHEK2/BACH1/PLRG1/INHBA/POLE4/EIF4G1/ZNF324 |
| Biological Process | GO:1903533 | regulation of protein targeting                                          | 13/2279 | 82/18866  | 0.1861833 | 0.5338711 | 0.4830655 | 13 | KCNE1/ITGB1BP1/USP36/ABLIM3/UBE2J2/ITGB2/FIS1/MYO1C/MIEF1/SREBF1/PDZK1/PRKAA1/PRKN                                                                                                                                                                                    |
| Biological Process | GO:0043524 | negative regulation of neuron apoptotic process                          | 22/2279 | 149/18866 | 0.186402  | 0.5338711 | 0.4830655 | 22 | IL10/ANGPT1/ARRB1/HIPK2/ITSN1/UNC5B/ILK/SYNGAP1/GRN/PRKCI/ARRB2/NTRK1/BCL2/MEF2C/F2R/CEBPB/BCL2L1/TYRO3/CRLF1/NTF4/CX3CR1/PRKN                                                                                                                                        |
| Biological Process | GO:1903364 | positive regulation of cellular protein catabolic process                | 22/2279 | 149/18866 | 0.186402  | 0.5338711 | 0.4830655 | 22 | RNF144A/FZR1/RNF19A/CSNK1D/TNFAIP3/VGLL4/CBFA2T3/DISC1/EDEM1/CLU/SMAD7/SMURF1/AXIN1/EDEM2/CSNK1E/NFE2L2/RNF144B/RNF14/TRIB1/EZR/RNF40/PRKN                                                                                                                            |
| Biological Process | GO:0090257 | regulation of muscle system process                                      | 36/2279 | 256/18866 | 0.1869645 | 0.5338711 | 0.4830655 | 36 | HDAC4/PDE4D/ENO1/CTDP1/CASQ2/MIR143/MIR145/CACNA1C/TNFRSF1B/SMAD3/SLC8A1/PRKCA/CTTN/MIR199A1/ANXA6/GJA5/TNNT3/JUP/BIN1/NOS1AP/TNFRSF1A/SMAD7/GH<br>RL/CHRM2/KCNQ1/PDE9A/MIR199A2/NOTCH1/GSTO1/P2RX1/F2R/FOXO1/ANK2/CASQ1/DAPK3/GRK2                                   |

|                    |            |                                                                           |         |           |           |           |           |    |                                                                                                                                                                                                   |
|--------------------|------------|---------------------------------------------------------------------------|---------|-----------|-----------|-----------|-----------|----|---------------------------------------------------------------------------------------------------------------------------------------------------------------------------------------------------|
| Biological Process | GO:0007188 | adenylate cyclase-modulating G protein-coupled receptor signaling pathway | 33/2279 | 233/18866 | 0.1876089 | 0.5338711 | 0.4830655 | 33 | PDE4D/ADCY2/AKAP13/ADCY9/PRKCA/FPR2/FPR1/GNAZ/GNAI2/MRAP/AKAP5/GNAT2/MARCO/RAPGEF2/GRK5/GIPR/GNA11/CHRM2/ABCA1/PALM/CNR2/ADCY4/S1PR2/GNG2/GABBR1/GNAO1/LPAR2/GNA12/S1PR4/GPR4/VIPR2/ADGRG3/ADGRE3 |
| Biological Process | GO:0042100 | B cell proliferation                                                      | 15/2279 | 97/18866  | 0.1894739 | 0.5338711 | 0.4830655 | 15 | IL10/INPP5D/NFATC2/TNFSF13B/TLR9/MNDA/TNFRSF21/CD79A/BLK/PTPRC/CD320/BCL2/MEF2C/PELI1/VAV3                                                                                                        |
| Biological Process | GO:0001910 | regulation of leukocyte mediated cytotoxicity                             | 12/2279 | 75/18866  | 0.1897387 | 0.5338711 | 0.4830655 | 12 | PIK3R6/CD226/HLA-F/NCR1/RIPK3/PTPRC/ARRB2/IL18RAP/DNASE1L3/CADM1/FADD/CYRIB                                                                                                                       |
| Biological Process | GO:0030858 | positive regulation of epithelial cell differentiation                    | 12/2279 | 75/18866  | 0.1897387 | 0.5338711 | 0.4830655 | 12 | VDR/ZEB2/RFX3/PAX2/PRKCH/NUMA1/ADD1/NOTCH1/S1PR2/ZBED2/LIF/MACROH2A2                                                                                                                              |
| Biological Process | GO:0045685 | regulation of glial cell differentiation                                  | 12/2279 | 75/18866  | 0.1897387 | 0.5338711 | 0.4830655 | 12 | PPARG/TNFRSF1B/RHEB/BIN1/TNFRSF21/HDAC1/TGFB1/NF1/WDR1/NOTCH1/RELA/LIF                                                                                                                            |
| Biological Process | GO:0048844 | artery morphogenesis                                                      | 12/2279 | 75/18866  | 0.1897387 | 0.5338711 | 0.4830655 | 12 | MIR143/MIR145/MYLK/GJA5/RBPJ/SMAD7/WNT11/ZMIZ1/NF1/ENG/NOTCH1/PDGFRB                                                                                                                              |
| Biological Process | GO:0002710 | negative regulation of T cell mediated immunity                           | 4/2279  | 19/18866  | 0.1897416 | 0.5338711 | 0.4830655 | 4  | DUSP22/HLA-F/SMAD7/PTPRC                                                                                                                                                                          |
| Biological Process | GO:0006044 | N-acetylglucosamine metabolic process                                     | 4/2279  | 19/18866  | 0.1897416 | 0.5338711 | 0.4830655 | 4  | NAGK/AMDHD2/MGAT3/CHST2                                                                                                                                                                           |
| Biological Process | GO:0007549 | dosage compensation                                                       | 4/2279  | 19/18866  | 0.1897416 | 0.5338711 | 0.4830655 | 4  | CDYL/PCGF3/RBM15B/MACROH2A2                                                                                                                                                                       |

|                    |            |                                                       |        |          |           |           |           |   |                               |
|--------------------|------------|-------------------------------------------------------|--------|----------|-----------|-----------|-----------|---|-------------------------------|
| Biological Process | GO:0010985 | negative regulation of lipoprotein particle clearance | 4/2279 | 19/18866 | 0.1897416 | 0.5338711 | 0.4830655 | 4 | MIR199A1/MIR27A/CSK/MIR199A2  |
| Biological Process | GO:0015802 | basic amino acid transport                            | 4/2279 | 19/18866 | 0.1897416 | 0.5338711 | 0.4830655 | 4 | SLC11A1/SLC15A4/SLC7A7/SLC7A1 |
| Biological Process | GO:0019184 | nonribosomal peptide biosynthetic process             | 4/2279 | 19/18866 | 0.1897416 | 0.5338711 | 0.4830655 | 4 | GGT1/CNDP2/MGST2/NFE2L2       |
| Biological Process | GO:0030050 | vesicle transport along actin filament                | 4/2279 | 19/18866 | 0.1897416 | 0.5338711 | 0.4830655 | 4 | ACTN4/WASL/MYO5A/MYO1C        |
| Biological Process | GO:0033189 | response to vitamin A                                 | 4/2279 | 19/18866 | 0.1897416 | 0.5338711 | 0.4830655 | 4 | PPARG/RARA/CAT/ALDH1A2        |
| Biological Process | GO:0045063 | T-helper 1 cell differentiation                       | 4/2279 | 19/18866 | 0.1897416 | 0.5338711 | 0.4830655 | 4 | IL27/SEMA4A/IL18R1/HLX        |
| Biological Process | GO:0045683 | negative regulation of epidermis development          | 4/2279 | 19/18866 | 0.1897416 | 0.5338711 | 0.4830655 | 4 | DLL1/CDH3/GRHL2/NOTCH1        |
| Biological Process | GO:0045780 | positive regulation of bone resorption                | 4/2279 | 19/18866 | 0.1897416 | 0.5338711 | 0.4830655 | 4 | DEF8/PRKCA/TMEM64/PLEKHM1     |
| Biological Process | GO:0046629 | gamma-delta T cell activation                         | 4/2279 | 19/18866 | 0.1897416 | 0.5338711 | 0.4830655 | 4 | CCR9/PTPRC/NOD2/JAML          |

|                    |            |                                                                                       |        |          |           |           |           |   |                            |
|--------------------|------------|---------------------------------------------------------------------------------------|--------|----------|-----------|-----------|-----------|---|----------------------------|
| Biological Process | GO:0046852 | positive regulation of bone remodeling                                                | 4/2279 | 19/18866 | 0.1897416 | 0.5338711 | 0.4830655 | 4 | DEF8/PRKCA/TMEM64/PLEKHM1  |
| Biological Process | GO:0060252 | positive regulation of glial cell proliferation                                       | 4/2279 | 19/18866 | 0.1897416 | 0.5338711 | 0.4830655 | 4 | MYB/TNF/PRKCH/PRKCI        |
| Biological Process | GO:0070233 | negative regulation of T cell apoptotic process                                       | 4/2279 | 19/18866 | 0.1897416 | 0.5338711 | 0.4830655 | 4 | CCL5/PTCRA/DOCK8/FADD      |
| Biological Process | GO:0098543 | detection of other organism                                                           | 4/2279 | 19/18866 | 0.1897416 | 0.5338711 | 0.4830655 | 4 | NLRC4/PGLYRP1/NOD2/PGLYRP4 |
| Biological Process | GO:0098911 | regulation of ventricular cardiac muscle cell action potential                        | 4/2279 | 19/18866 | 0.1897416 | 0.5338711 | 0.4830655 | 4 | CACNA1C/JUP/BIN1/NOS1AP    |
| Biological Process | GO:0150146 | cell junction disassembly                                                             | 4/2279 | 19/18866 | 0.1897416 | 0.5338711 | 0.4830655 | 4 | IQSEC1/DUSP3/C1QB/CX3CR1   |
| Biological Process | GO:1902170 | cellular response to reactive nitrogen species                                        | 4/2279 | 19/18866 | 0.1897416 | 0.5338711 | 0.4830655 | 4 | DNM2/TRAF2/AQP1/FOXO1      |
| Biological Process | GO:1902176 | negative regulation of oxidative stress-induced intrinsic apoptotic signaling pathway | 4/2279 | 19/18866 | 0.1897416 | 0.5338711 | 0.4830655 | 4 | NOL3/NFE2L2/BAG5/PRKN      |
| Biological Process | GO:2000042 | negative regulation of double-strand break repair via homologous recombination        | 4/2279 | 19/18866 | 0.1897416 | 0.5338711 | 0.4830655 | 4 | RM12/RECQL5/TP53BP1/FBH1   |

|                    |            |                                                                                   |         |           |           |           |           |    |                                                                                                                                                                            |
|--------------------|------------|-----------------------------------------------------------------------------------|---------|-----------|-----------|-----------|-----------|----|----------------------------------------------------------------------------------------------------------------------------------------------------------------------------|
| Biological Process | GO:2000319 | regulation of T-helper 17 cell differentiation                                    | 4/2279  | 19/18866  | 0.1897416 | 0.5338711 | 0.4830655 | 4  | NLRP3/LOXL3/SMAD7/ZBTB7B                                                                                                                                                   |
| Biological Process | GO:0005976 | polysaccharide metabolic process                                                  | 17/2279 | 112/18866 | 0.1910565 | 0.5338711 | 0.4830655 | 17 | CSGALNACT1/PRKAG2/AP2A1/AOAH/MGAM/CHIT1/NDST1/TGFB1/DYRK2/PDGFB/PPP1CB/ESRRB/PER2/PCDH12/HAS3/B3GNT2/RUBCNL                                                                |
| Biological Process | GO:0099565 | chemical synaptic transmission, postsynaptic                                      | 17/2279 | 112/18866 | 0.1910565 | 0.5338711 | 0.4830655 | 17 | PRKCZ/SSH1/ZMYND8/BAIAP2/APP/NRXN1/GHRL/SH3GL1/MAPK8IP2/ARRB2/S1PR2/P2RX1/MEF2C/SHANK2/SLC29A1/P2RX5/CUX2                                                                  |
| Biological Process | GO:0030879 | mammary gland development                                                         | 21/2279 | 142/18866 | 0.1911038 | 0.5338711 | 0.4830655 | 21 | RREB1/NCOR2/CREB1/BRCA2/LRP5L/VDR/CSF1R/LBH/STAT5A/RTN4/TGFBR2/ZBTB7B/HK2/NCOA1/HOXA9/NOTCH4/USF2/CEBPB/SLC29A1/ATP7B/DHODH                                                |
| Biological Process | GO:1903052 | positive regulation of proteolysis involved in cellular protein catabolic process | 19/2279 | 127/18866 | 0.1914837 | 0.5338711 | 0.4830655 | 19 | RNF144A/FZR1/RNF19A/CSNK1D/CBFA2T3/DISC1/EDEM1/CLU/SMAD7/SMURF1/AXIN1/EDEM2/CSNK1E/NFE2L2/RNF144B/RNF14/TRIB1/RNF40/PRKN                                                   |
| Biological Process | GO:0022406 | membrane docking                                                                  | 26/2279 | 180/18866 | 0.1918693 | 0.5338711 | 0.4830655 | 26 | DCTN1/STX5/CSNK1D/NDE1/PACS2/DYNC1H1/TUBB4B/SNX3/CEP135/CEP164/DCTN2/CEP78/VPS18/CTBP2/ATG14/CSNK1E/PPP2R1A/TUBA4A/SDCCAG8/PDZD8/ESYT1/CEP72/EZR/T<br>SNARE1/NPHP4/GRAMD2A |
| Biological Process | GO:0032642 | regulation of chemokine production                                                | 11/2279 | 68/18866  | 0.1931463 | 0.5338711 | 0.4830655 | 11 | ZFPM1/FOXP1/IL10/C1QTNF3/MEFV/TNF/TLR9/MBP/DEFB124/IL6R/ACKR1                                                                                                              |
| Biological Process | GO:0034381 | plasma lipoprotein particle clearance                                             | 11/2279 | 68/18866  | 0.1931463 | 0.5338711 | 0.4830655 | 11 | EHD1/AP2A1/LIPC/MIR199A1/GPLD1/HDLBP/MIR27A/CSK/NPC1/MIR199A2/LMF1                                                                                                         |
| Biological Process | GO:0045428 | regulation of nitric oxide biosynthetic process                                   | 11/2279 | 68/18866  | 0.1931463 | 0.5338711 | 0.4830655 | 11 | IL10/SMAD3/DNM2/MIR199A1/TNF/NOS1AP/CLU/HBB/ITGB2/MIR199A2/CX3CR1                                                                                                          |

|                    |            |                                                                               |         |           |           |           |           |    |                                                                                                                                                                                                                                                                             |
|--------------------|------------|-------------------------------------------------------------------------------|---------|-----------|-----------|-----------|-----------|----|-----------------------------------------------------------------------------------------------------------------------------------------------------------------------------------------------------------------------------------------------------------------------------|
| Biological Process | GO:0072577 | endothelial cell apoptotic process                                            | 11/2279 | 68/18866  | 0.1931463 | 0.5338711 | 0.4830655 | 11 | IL10/ANGPT1/TNF/TNFAIP3/MIR101-2/THBS1/MIR24-2/PRKCI/NFE2L2/ANO6/PLCG1                                                                                                                                                                                                      |
| Biological Process | GO:0051961 | negative regulation of nervous system development                             | 44/2279 | 319/18866 | 0.1932168 | 0.5338711 | 0.4830655 | 44 | SEMA6B/CTS2/GFI1/SORL1/CALR/KANK1/LSM1/YWHAH/SKI/SUFU/TNF/BCL11A/SEMA4A/RTN4/PMP22/SEMA4B/DLL1/APP/MIB1/IFRD1/TNFRSF21/ASAP1/SYNGAP1/KREMEN1/SEMA4D/RAPGEF2/NF1/ITM2C/MEIS1/DNM3/NOTCH1/ZHX2/CDKL3/UBE3A/ARHGEF2/ARHGEF15/CERS2/INPP5F/SLIT1/BAG5/RAP1GAP2/HES3/PRAG1/SPART |
| Biological Process | GO:0090501 | RNA phosphodiester bond hydrolysis                                            | 24/2279 | 165/18866 | 0.1936121 | 0.5338711 | 0.4830655 | 24 | PIWIL4/RNASE3/FIP1L1/EXOSC2/ERN1/CPSF3/SLFN14/RCL1/AGO1/ZC3H12D/RNASE10/AGO2/EDC3/NOB1/ERI3/SMG6/RMRP/NOP14/DIS3L2/SND1/TOE1/CPSF4/TUT1/ISG20                                                                                                                               |
| Biological Process | GO:0032465 | regulation of cytokinesis                                                     | 14/2279 | 90/18866  | 0.1937099 | 0.5338711 | 0.4830655 | 14 | BRCA2/SETD2/KIF13A/E2F7/CUL3/GIT1/UVRAG/SVIL/CSPP1/ZFYVE19/KLHL21/PRKCE/BCL2L1/CDC14A                                                                                                                                                                                       |
| Biological Process | GO:0051783 | regulation of nuclear division                                                | 27/2279 | 188/18866 | 0.1947584 | 0.5338711 | 0.4830655 | 27 | CALR/FZR1/TGFA/MAD1L1/TNKS/NSMCE2/RCC1/CUL3/CCDC8/CDC16/TACC3/NUMA1/PDGFB/PLCB1/NEK6/RB1/CDC45/ANAPC7/PDGFRB/HECW2/CDC14A/AURKAIP1/LIF/DAPK3/CDK13/PCID2/SLF1                                                                                                               |
| Biological Process | GO:0031396 | regulation of protein ubiquitination                                          | 30/2279 | 211/18866 | 0.1949549 | 0.5338711 | 0.4830655 | 30 | FZR1/ANGPT1/ARRB1/TNFAIP3/MIR101-2/CUL3/OTUB2/SMAD7/AXIN1/MTA1/BCL10/ARRB2/MIR138-2/PER2/OTUB1/NOD2/NXN/DNM1L/PRKCE/UBXN2A/UBE3A/TRIP12/DYSF/RNF40/BAG5/PARP10/PELI1/PAXIP1/PRKN/MARCHF7                                                                                    |
| Biological Process | GO:0070665 | positive regulation of leukocyte proliferation                                | 22/2279 | 150/18866 | 0.1950197 | 0.5338711 | 0.4830655 | 22 | HLA-DMB/CD55/CCR2/CCL5/CSF1R/NCK2/NFATC2/TNFSF13B/TLR9/TGFBR2/CCDC88B/PTPRC/CD320/SPTA1/ZNF335/PNP/BCL2/MEF2C/SLC7A1/FADD/PELI1/VAV3                                                                                                                                        |
| Biological Process | GO:0070085 | glycosylation                                                                 | 37/2279 | 265/18866 | 0.1952408 | 0.5338711 | 0.4830655 | 37 | FUT4/GALNT2/FUT7/RPN1/XXYL1/SLC35C2/MGAT5/ST6GALNAC1/GALNT12/MGAT4A/MGAT3/MUC12/ASGR2/GXYLT2/B4GALT7/POMT2/MUC20/B3GNT5/ST6GAL1/ST8SIA6/ST3GAL4/TET2/B4GALT3/PMM2/NPC1/GALNT9/FUT11/GCNT2/GFPT2/LMF1/ALG11/CLN5/MAN1C1/DPAGT1/ST3GAL2/B3GNT2/B4GAT1                         |
| Biological Process | GO:0002381 | immunoglobulin production involved in immunoglobulin mediated immune response | 10/2279 | 61/18866  | 0.1963085 | 0.5338711 | 0.4830655 | 10 | IL10/UNG/TGFB1/PTPRC/POU2F2/TP53BP1/ERCC1/TNFSF13/PAXIP1/NSD2                                                                                                                                                                                                               |



|                    |            |                                                   |         |           |           |           |           |    |                                                                                                                                                                                                                               |
|--------------------|------------|---------------------------------------------------|---------|-----------|-----------|-----------|-----------|----|-------------------------------------------------------------------------------------------------------------------------------------------------------------------------------------------------------------------------------|
| Biological Process | GO:0010965 | regulation of mitotic sister chromatid separation | 10/2279 | 61/18866  | 0.1963085 | 0.5338711 | 0.4830655 | 10 | MAD1L1/NSMCE2/CUL3/CDC16/TACC3/NEK6/RB1/ANAPC7/HECW2/PCID2                                                                                                                                                                    |
| Biological Process | GO:0042733 | embryonic digit morphogenesis                     | 10/2279 | 61/18866  | 0.1963085 | 0.5338711 | 0.4830655 | 10 | CHST11/ZBTB16/HDAC1/GRHL2/IFT140/CREBBP/NOTCH1/GNA12/MAP3K20/CPLANE1                                                                                                                                                          |
| Biological Process | GO:0033209 | tumor necrosis factor-mediated signaling pathway  | 25/2279 | 173/18866 | 0.1968258 | 0.5338711 | 0.4830655 | 25 | AIM2/TNFRSF1B/TNF/TRAF2/TNFAIP3/TRAF1/TNFSF13B/TRAIP/RIPK1/ACTN4/MIR24-2/TNFRSF1A/ILK/CPNE1/CDIP1/PSMF1/MAP3K14/PSMB7/CASP1/TNFSF12/TNFSF13/CYLD/RELA/PSMD13/PRKN                                                             |
| Biological Process | GO:0006260 | DNA replication                                   | 38/2279 | 273/18866 | 0.1968993 | 0.5338711 | 0.4830655 | 38 | BLM/POLE/BRCA2/RMI2/TOP1MT/RTEL1/HUS1/NFIC/NFIX/E2F7/MCM5/WRNIP1/ZBTB38/RECQL5/POLA2/EME1/RRM2B/EHMT2/IGHMBP2/FGFR1/MCM2/SMARCAL1/PPP2R1A/GINS3/CLSPN/PTMS/RHNO1/CHEK2/BCAR3/SLX4/CHAF1A/KAT7/POLD3/ING5/POLE4/POL1/NFIA/FBH1 |
| Biological Process | GO:0050728 | negative regulation of inflammatory response      | 28/2279 | 196/18866 | 0.1974557 | 0.5338711 | 0.4830655 | 28 | ELANE/ABR/IL10/PPARG/C1QTNF3/MIR140/MIR145/TNFRSF1B/NLRP3/SMAD3/MEFV/SMPDL3B/TNFAIP3/AOAH/FPR2/TNFAIP6/TNFRSF1A/CXCL17/PGLYRP1/GHRL/PTPRC/GRN/BCR/CNR2/ETS1/MIR138-2/RB1/TYRO3                                                |
| Biological Process | GO:0002088 | lens development in camera-type eye               | 13/2279 | 83/18866  | 0.1979736 | 0.5338711 | 0.4830655 | 13 | SPRED2/FZR1/SKI/SMAD3/ZEB2/HIPK2/TGFBR2/CRYBB1/WNT5B/MEIS1/BCAR3/TMOD1/NECTIN1                                                                                                                                                |
| Biological Process | GO:0048708 | astrocyte differentiation                         | 13/2279 | 83/18866  | 0.1979736 | 0.5338711 | 0.4830655 | 13 | S100A8/TNF/FPR2/EIF2B5/BIN1/DLL1/APP/NF1/GRN/TTC21B/NOTCH1/TSPAN2/LIF                                                                                                                                                         |
| Biological Process | GO:0055013 | cardiac muscle cell development                   | 13/2279 | 83/18866  | 0.1979736 | 0.5338711 | 0.4830655 | 13 | CTDP1/MYO18B/TTN/MYH11/AKAP13/MAML1/SLC8A1/MIR199A1/MIR24-2/MIR23A/MIR199A2/FHL2/PDGFRB                                                                                                                                       |
| Biological Process | GO:0055117 | regulation of cardiac muscle contraction          | 13/2279 | 83/18866  | 0.1979736 | 0.5338711 | 0.4830655 | 13 | HDAC4/PDE4D/CASQ2/CACNA1C/SLC8A1/GJA5/JUP/BIN1/NOS1AP/SMAD7/KCNQ1/GSTO1/ANK2                                                                                                                                                  |

|                    |            |                                                       |        |          |           |           |           |   |                                  |
|--------------------|------------|-------------------------------------------------------|--------|----------|-----------|-----------|-----------|---|----------------------------------|
| Biological Process | GO:0002507 | tolerance induction                                   | 5/2279 | 26/18866 | 0.1985201 | 0.5338711 | 0.4830655 | 5 | TNFAIP3/PHLPP1/TGFBR2/BLK/MARCH7 |
| Biological Process | GO:0003171 | atrioventricular valve development                    | 5/2279 | 26/18866 | 0.1985201 | 0.5338711 | 0.4830655 | 5 | ZFPM1/GJA5/TGFBR2/NOTCH1/SLIT3   |
| Biological Process | GO:0021952 | central nervous system projection neuron axonogenesis | 5/2279 | 26/18866 | 0.1985201 | 0.5338711 | 0.4830655 | 5 | ZEB2/EPHB3/CDH11/SPTBN4/TSKU     |
| Biological Process | GO:0032743 | positive regulation of interleukin-2 production       | 5/2279 | 26/18866 | 0.1985201 | 0.5338711 | 0.4830655 | 5 | PDE4D/RUNX1/CCR2/TRAF2/PTPRC     |
| Biological Process | GO:0035902 | response to immobilization stress                     | 5/2279 | 26/18866 | 0.1985201 | 0.5338711 | 0.4830655 | 5 | PPARG/SLC8A1/BRD1/ERCC1/HNMT     |
| Biological Process | GO:0042730 | fibrinolysis                                          | 5/2279 | 26/18866 | 0.1985201 | 0.5338711 | 0.4830655 | 5 | PLAU/SERPINB2/THBS1/F12/CPB2     |
| Biological Process | GO:0044068 | modulation by symbiont of host cellular process       | 5/2279 | 26/18866 | 0.1985201 | 0.5338711 | 0.4830655 | 5 | ULK1/PABPN1/TNIP1/BCL2L1/CPSF4   |
| Biological Process | GO:0046174 | polyol catabolic process                              | 5/2279 | 26/18866 | 0.1985201 | 0.5338711 | 0.4830655 | 5 | SYNJ2/INPP5A/NUDT3/INPP5E/IMPA2  |
| Biological Process | GO:0051560 | mitochondrial calcium ion homeostasis                 | 5/2279 | 26/18866 | 0.1985201 | 0.5338711 | 0.4830655 | 5 | ANXA6/DISC1/IMMT/FIS1/PDZD8      |

|                    |            |                                                           |         |           |           |           |           |    |                                                                                                                                                                                                             |
|--------------------|------------|-----------------------------------------------------------|---------|-----------|-----------|-----------|-----------|----|-------------------------------------------------------------------------------------------------------------------------------------------------------------------------------------------------------------|
| Biological Process | GO:0060219 | camera-type eye photoreceptor cell differentiation        | 5/2279  | 26/18866  | 0.1985201 | 0.5338711 | 0.4830655 | 5  | GNAT2/RPGRIP1/SDK2/NRL/CABP4                                                                                                                                                                                |
| Biological Process | GO:0060390 | regulation of SMAD protein signal transduction            | 5/2279  | 26/18866  | 0.1985201 | 0.5338711 | 0.4830655 | 5  | TGFB1/NUP93/WWTR1/RBPMS/NODAL                                                                                                                                                                               |
| Biological Process | GO:0090023 | positive regulation of neutrophil chemotaxis              | 5/2279  | 26/18866  | 0.1985201 | 0.5338711 | 0.4830655 | 5  | C3AR1/CAMK1D/DAPK2/DNM1L/DYSF                                                                                                                                                                               |
| Biological Process | GO:0035051 | cardiocyte differentiation                                | 23/2279 | 158/18866 | 0.1986293 | 0.5338711 | 0.4830655 | 23 | RXRA/CALR/CTDP1/MYO18B/TTN/MIR145/MYH11/AKAP13/MAML1/SLC8A1/MIR199A1/DLL1/RBPJ/MIR24-2/MIR23A/TGFB1/RARA/ARRB2/MIR199A2/NOTCH1/MEF2C/FHL2/PDGFRB                                                            |
| Biological Process | GO:0060968 | cellular defense response                                 | 9/2279  | 54/18866  | 0.1990781 | 0.5338711 | 0.4830655 | 9  | CCR2/MNDA/CLECSA/NCF2/CCR9/NCR1/BCL10/RELA/CX3CR1                                                                                                                                                           |
| Biological Process | GO:0031050 | dsRNA processing                                          | 9/2279  | 54/18866  | 0.1990781 | 0.5338711 | 0.4830655 | 9  | NCOR2/ZC3H7A/SMAD3/TNF/AGO1/RIPK1/AGO2/TGFB1/RMRP                                                                                                                                                           |
| Biological Process | GO:0070918 | production of small RNA involved in gene silencing by RNA | 9/2279  | 54/18866  | 0.1990781 | 0.5338711 | 0.4830655 | 9  | NCOR2/ZC3H7A/SMAD3/TNF/AGO1/RIPK1/AGO2/TGFB1/RMRP                                                                                                                                                           |
| Biological Process | GO:1901617 | organic hydroxy compound biosynthetic process             | 36/2279 | 258/18866 | 0.2001323 | 0.5338711 | 0.4830655 | 36 | PRKAG2/GFI1/SPTLC2/IDI1/VDR/ITPKB/AMACR/MBTPS1/TNF/ZEB2/ABCG1/PGP/PLTP/AKR1D1/DDC/OSBPL6/CDH3/P2RY6/SPHK2/RAPGEF2/HRH1/DGKQ/POR/MYO5A/ACACB/IMPA2/PDXK/ACOX2/PER2/ACACA/PCK2/HMGCS1/SCD/SREBF1/PRKAA1/IP6K1 |
| Biological Process | GO:0050810 | regulation of steroid biosynthetic process                | 15/2279 | 98/18866  | 0.2003684 | 0.5338711 | 0.4830655 | 15 | GFI1/IDI1/VDR/MBTPS1/TNF/ABCG1/DGKQ/SF1/POR/ACACB/ACACA/HMGCS1/SCD/SREBF1/PRKAA1                                                                                                                            |

|                    |            |                                                              |         |          |           |           |           |    |                                                                                           |
|--------------------|------------|--------------------------------------------------------------|---------|----------|-----------|-----------|-----------|----|-------------------------------------------------------------------------------------------|
| Biological Process | GO:2001243 | negative regulation of intrinsic apoptotic signaling pathway | 15/2279 | 98/18866 | 0.2003684 | 0.5338711 | 0.4830655 | 15 | ENO1/URI1/RRM2B/ZNF385A/CLU/HDAC1/NOL3/NFE2L2/BCL2/ARHGEF2/BCL2L1/BAG5/GRINA/PRKN/MARCHF7 |
| Biological Process | GO:000722  | telomere maintenance via recombination                       | 3/2279  | 13/18866 | 0.2011933 | 0.5338711 | 0.4830655 | 3  | BRCA2/NSMCE2/ERCC1                                                                        |
| Biological Process | GO:0002679 | respiratory burst involved in defense response               | 3/2279  | 13/18866 | 0.2011933 | 0.5338711 | 0.4830655 | 3  | MPO/PIK3CD/GRN                                                                            |
| Biological Process | GO:0002903 | negative regulation of B cell apoptotic process              | 3/2279  | 13/18866 | 0.2011933 | 0.5338711 | 0.4830655 | 3  | FOXP1/HSH2D/BCL10                                                                         |
| Biological Process | GO:0002921 | negative regulation of humoral immune response               | 3/2279  | 13/18866 | 0.2011933 | 0.5338711 | 0.4830655 | 3  | CD55/PTPN6/CD59                                                                           |
| Biological Process | GO:0003161 | cardiac conduction system development                        | 3/2279  | 13/18866 | 0.2011933 | 0.5338711 | 0.4830655 | 3  | MAML1/GJA5/NOTCH1                                                                         |
| Biological Process | GO:0007183 | SMAD protein complex assembly                                | 3/2279  | 13/18866 | 0.2011933 | 0.5338711 | 0.4830655 | 3  | SMAD3/LDLRAD4/TGFB1                                                                       |
| Biological Process | GO:0007501 | mesodermal cell fate specification                           | 3/2279  | 13/18866 | 0.2011933 | 0.5338711 | 0.4830655 | 3  | PAX2/FGFR1/NODAL                                                                          |
| Biological Process | GO:0009265 | 2'-deoxyribonucleotide biosynthetic process                  | 3/2279  | 13/18866 | 0.2011933 | 0.5338711 | 0.4830655 | 3  | GUK1/AK5/DCTD                                                                             |

|                    |            |                                                                            |        |          |           |           |           |   |                      |
|--------------------|------------|----------------------------------------------------------------------------|--------|----------|-----------|-----------|-----------|---|----------------------|
| Biological Process | GO:0009437 | carnitine metabolic process                                                | 3/2279 | 13/18866 | 0.2011933 | 0.5338711 | 0.4830655 | 3 | ACADM/POR/CPT1A      |
| Biological Process | GO:0010623 | programmed cell death<br>involved in cell development                      | 3/2279 | 13/18866 | 0.2011933 | 0.5338711 | 0.4830655 | 3 | NTRK1/DNASE1L3/BCL2  |
| Biological Process | GO:0010635 | regulation of mitochondrial<br>fusion                                      | 3/2279 | 13/18866 | 0.2011933 | 0.5338711 | 0.4830655 | 3 | VAT1/DNM1L/PRKN      |
| Biological Process | GO:0010958 | regulation of amino acid<br>import across plasma<br>membrane               | 3/2279 | 13/18866 | 0.2011933 | 0.5338711 | 0.4830655 | 3 | SLC43A2/PER2/SLC43A1 |
| Biological Process | GO:0015791 | polyol transport                                                           | 3/2279 | 13/18866 | 0.2011933 | 0.5338711 | 0.4830655 | 3 | AQP1/AQP3/AQP9       |
| Biological Process | GO:0018095 | protein polyglutamylation                                                  | 3/2279 | 13/18866 | 0.2011933 | 0.5338711 | 0.4830655 | 3 | TTLL4/TTLL11/TTLL1   |
| Biological Process | GO:0019755 | one-carbon compound<br>transport                                           | 3/2279 | 13/18866 | 0.2011933 | 0.5338711 | 0.4830655 | 3 | AQP1/AQP3/AQP9       |
| Biological Process | GO:0031665 | negative regulation of<br>lipopolysaccharide-mediated<br>signaling pathway | 3/2279 | 13/18866 | 0.2011933 | 0.5338711 | 0.4830655 | 3 | TNFAIP3/LTF/TRIB1    |
| Biological Process | GO:0035723 | interleukin-15-mediated<br>signaling pathway                               | 3/2279 | 13/18866 | 0.2011933 | 0.5338711 | 0.4830655 | 3 | STAT5A/JAK1/PLCB1    |

|                    |            |                                                       |        |          |           |           |           |   |                     |
|--------------------|------------|-------------------------------------------------------|--------|----------|-----------|-----------|-----------|---|---------------------|
| Biological Process | GO:0042635 | positive regulation of hair cycle                     | 3/2279 | 13/18866 | 0.2011933 | 0.5338711 | 0.4830655 | 3 | TNF/KRT17/NUMA1     |
| Biological Process | GO:0043247 | telomere maintenance in response to DNA damage        | 3/2279 | 13/18866 | 0.2011933 | 0.5338711 | 0.4830655 | 3 | RTEL1/ERCC1/TFIP11  |
| Biological Process | GO:0046349 | amino sugar biosynthetic process                      | 3/2279 | 13/18866 | 0.2011933 | 0.5338711 | 0.4830655 | 3 | NAGK/AMDHD2/GFPT2   |
| Biological Process | GO:0046385 | deoxyribose phosphate biosynthetic process            | 3/2279 | 13/18866 | 0.2011933 | 0.5338711 | 0.4830655 | 3 | GUK1/AK5/DCTD       |
| Biological Process | GO:0046415 | urate metabolic process                               | 3/2279 | 13/18866 | 0.2011933 | 0.5338711 | 0.4830655 | 3 | SLC2A9/SLC22A11/PNP |
| Biological Process | GO:0048548 | regulation of pinocytosis                             | 3/2279 | 13/18866 | 0.2011933 | 0.5338711 | 0.4830655 | 3 | ANKFY1/ACTN4/NR1H2  |
| Biological Process | GO:0048711 | positive regulation of astrocyte differentiation      | 3/2279 | 13/18866 | 0.2011933 | 0.5338711 | 0.4830655 | 3 | BIN1/NOTCH1/LIF     |
| Biological Process | GO:0051001 | negative regulation of nitric-oxide synthase activity | 3/2279 | 13/18866 | 0.2011933 | 0.5338711 | 0.4830655 | 3 | CNR2/MIR138-2/NOSIP |
| Biological Process | GO:0060100 | positive regulation of phagocytosis, engulfment       | 3/2279 | 13/18866 | 0.2011933 | 0.5338711 | 0.4830655 | 3 | PPARG/RAB31/ANO6    |

|                    |            |                                                                                |        |          |           |           |           |   |                         |
|--------------------|------------|--------------------------------------------------------------------------------|--------|----------|-----------|-----------|-----------|---|-------------------------|
| Biological Process | GO:0061000 | negative regulation of dendritic spine development                             | 3/2279 | 13/18866 | 0.2011933 | 0.5338711 | 0.4830655 | 3 | ASAP1/DNM3/UBE3A        |
| Biological Process | GO:0061052 | negative regulation of cell growth involved in cardiac muscle cell development | 3/2279 | 13/18866 | 0.2011933 | 0.5338711 | 0.4830655 | 3 | CTDP1/MIR199A1/MIR199A2 |
| Biological Process | GO:0070914 | UV-damage excision repair                                                      | 3/2279 | 13/18866 | 0.2011933 | 0.5338711 | 0.4830655 | 3 | ERCC1/POLD3/XPA         |
| Biological Process | GO:0071287 | cellular response to manganese ion                                             | 3/2279 | 13/18866 | 0.2011933 | 0.5338711 | 0.4830655 | 3 | SLFN14/APP/PRKN         |
| Biological Process | GO:0071350 | cellular response to interleukin-15                                            | 3/2279 | 13/18866 | 0.2011933 | 0.5338711 | 0.4830655 | 3 | STAT5A/JAK1/PLCB1       |
| Biological Process | GO:0072182 | regulation of nephron tubule epithelial cell differentiation                   | 3/2279 | 13/18866 | 0.2011933 | 0.5338711 | 0.4830655 | 3 | PAX2/WWTR1/LIF          |
| Biological Process | GO:0072683 | T cell extravasation                                                           | 3/2279 | 13/18866 | 0.2011933 | 0.5338711 | 0.4830655 | 3 | CCR2/RIPK3/FADD         |
| Biological Process | GO:0072710 | response to hydroxyurea                                                        | 3/2279 | 13/18866 | 0.2011933 | 0.5338711 | 0.4830655 | 3 | BLM/SPIDR/KAT7          |
| Biological Process | GO:0098734 | macromolecule depalmitoylation                                                 | 3/2279 | 13/18866 | 0.2011933 | 0.5338711 | 0.4830655 | 3 | ABHD16A/ABHD16B/LYPLA2  |

|                    |            |                                                           |        |          |           |           |           |   |                      |
|--------------------|------------|-----------------------------------------------------------|--------|----------|-----------|-----------|-----------|---|----------------------|
| Biological Process | GO:0098789 | pre-mRNA cleavage required for polyadenylation            | 3/2279 | 13/18866 | 0.2011933 | 0.5338711 | 0.4830655 | 3 | FIP1L1/CPSF4/TUT1    |
| Biological Process | GO:0098974 | postsynaptic actin cytoskeleton organization              | 3/2279 | 13/18866 | 0.2011933 | 0.5338711 | 0.4830655 | 3 | NOS1AP/ACTG1/DBNL    |
| Biological Process | GO:0150105 | protein localization to cell-cell junction                | 3/2279 | 13/18866 | 0.2011933 | 0.5338711 | 0.4830655 | 3 | ACTN4/ACTG1/MPP7     |
| Biological Process | GO:1902306 | negative regulation of sodium ion transmembrane transport | 3/2279 | 13/18866 | 0.2011933 | 0.5338711 | 0.4830655 | 3 | PRKCE/NEDD4/HECW2    |
| Biological Process | GO:1902947 | regulation of tau-protein kinase activity                 | 3/2279 | 13/18866 | 0.2011933 | 0.5338711 | 0.4830655 | 3 | SORL1/CLU/RB1        |
| Biological Process | GO:1903651 | positive regulation of cytoplasmic transport              | 3/2279 | 13/18866 | 0.2011933 | 0.5338711 | 0.4830655 | 3 | SORL1/EZR/PRKN       |
| Biological Process | GO:1903789 | regulation of amino acid transmembrane transport          | 3/2279 | 13/18866 | 0.2011933 | 0.5338711 | 0.4830655 | 3 | SLC43A2/PER2/SLC43A1 |
| Biological Process | GO:1905155 | positive regulation of membrane invagination              | 3/2279 | 13/18866 | 0.2011933 | 0.5338711 | 0.4830655 | 3 | PPARG/RAB31/ANO6     |
| Biological Process | GO:1905244 | regulation of modification of synaptic structure          | 3/2279 | 13/18866 | 0.2011933 | 0.5338711 | 0.4830655 | 3 | ITSN1/BAIAP2/CYFIP1  |



|                    |            |                                                                |         |           |           |           |           |    |                                                                                                                                                                                                                                                                             |
|--------------------|------------|----------------------------------------------------------------|---------|-----------|-----------|-----------|-----------|----|-----------------------------------------------------------------------------------------------------------------------------------------------------------------------------------------------------------------------------------------------------------------------------|
| Biological Process | GO:2000052 | positive regulation of non-canonical Wnt signaling pathway     | 3/2279  | 13/18866  | 0.2011933 | 0.5338711 | 0.4830655 | 3  | CSNK1D/CSNK1E/ANKRD6                                                                                                                                                                                                                                                        |
| Biological Process | GO:2000121 | regulation of removal of superoxide radicals                   | 3/2279  | 13/18866  | 0.2011933 | 0.5338711 | 0.4830655 | 3  | TNF/NFE2L2/SIRT3                                                                                                                                                                                                                                                            |
| Biological Process | GO:0010559 | regulation of glycoprotein biosynthetic process                | 8/2279  | 47/18866  | 0.2012253 | 0.5338711 | 0.4830655 | 8  | MIR101-2/TCF7L2/AGO2/POMT2/ITM2C/PLCB1/BCL2/PXYLP1                                                                                                                                                                                                                          |
| Biological Process | GO:0035850 | epithelial cell differentiation involved in kidney development | 8/2279  | 47/18866  | 0.2012253 | 0.5338711 | 0.4830655 | 8  | PAX2/MTSS1/WWTR1/PDGFB/NOTCH1/MEF2C/GPR4/LIF                                                                                                                                                                                                                                |
| Biological Process | GO:0043303 | mast cell degranulation                                        | 8/2279  | 47/18866  | 0.2012253 | 0.5338711 | 0.4830655 | 8  | LAT/PIK3CD/GAB2/FGR/CD84/SPHK2/FER/BLK                                                                                                                                                                                                                                      |
| Biological Process | GO:0044088 | regulation of vacuole organization                             | 8/2279  | 47/18866  | 0.2012253 | 0.5338711 | 0.4830655 | 8  | ENO1/ULK1/PIP4K2A/FEZ2/ENO3/GRN/TBC1D14/NPRL2                                                                                                                                                                                                                               |
| Biological Process | GO:0050919 | negative chemotaxis                                            | 8/2279  | 47/18866  | 0.2012253 | 0.5338711 | 0.4830655 | 8  | SEMA6B/NRP2/SEMA4A/SEMA4B/SEMA4D/ITGB3/SLIT3/SLIT1                                                                                                                                                                                                                          |
| Biological Process | GO:0071356 | cellular response to tumor necrosis factor                     | 41/2279 | 297/18866 | 0.2013744 | 0.5338711 | 0.4830655 | 41 | HDAC4/AIM2/LCN2/CHI3L1/TNFRSF1B/TNF/TRAF2/TNFAIP3/CCL5/TRAF1/TNFSF13B/ABCC2/TRAIIP/THBS1/RIPK1/ACTN4/MIR24-2/TNFRSF1A/ILK/TNFRSF21/CPNE1/CRHBP/SGMS1/ADAMTS13/CDIP1/PRPF8/CCL20/PSMF1/MAP3K14/NFE2L2/PSMB7/ARHGEF2/CASP1/TNFSF12/TNFSF13/CYLD/ANKRD1/RELA/CCL22/PSMD13/PRKN |
| Biological Process | GO:0009648 | photoperiodism                                                 | 6/2279  | 33/18866  | 0.2018785 | 0.5338711 | 0.4830655 | 6  | MTA1/PPP1CB/PER2/PER1/FBXL6/USP2                                                                                                                                                                                                                                            |

|                    |            |                                                                |         |           |           |           |           |    |                                                                                                                                                   |
|--------------------|------------|----------------------------------------------------------------|---------|-----------|-----------|-----------|-----------|----|---------------------------------------------------------------------------------------------------------------------------------------------------|
| Biological Process | GO:0033006 | regulation of mast cell activation involved in immune response | 6/2279  | 33/18866  | 0.2018785 | 0.5338711 | 0.4830655 | 6  | GAB2/FGR/CD84/SPHK2/FER/BLK                                                                                                                       |
| Biological Process | GO:0035115 | embryonic forelimb morphogenesis                               | 6/2279  | 33/18866  | 0.2018785 | 0.5338711 | 0.4830655 | 6  | CACNA1C/RDH10/RUNX2/HOXA9/ALX3/ALDH1A2                                                                                                            |
| Biological Process | GO:0035590 | purinergic nucleotide receptor signaling pathway               | 6/2279  | 33/18866  | 0.2018785 | 0.5338711 | 0.4830655 | 6  | GNAI2/P2RY6/P2RX1/ANO6/P2RX5/ACP3                                                                                                                 |
| Biological Process | GO:0040018 | positive regulation of multicellular organism growth           | 6/2279  | 33/18866  | 0.2018785 | 0.5338711 | 0.4830655 | 6  | CREB1/SH3PXD2B/GHRL/BCL2/EZR/SPTBN4                                                                                                               |
| Biological Process | GO:0046640 | regulation of alpha-beta T cell proliferation                  | 6/2279  | 33/18866  | 0.2018785 | 0.5338711 | 0.4830655 | 6  | CD55/CCR2/TGFBR2/ZBTB7B/PTPRC/VSIR                                                                                                                |
| Biological Process | GO:1905048 | regulation of metalloproteinase activity                       | 6/2279  | 33/18866  | 0.2018785 | 0.5338711 | 0.4830655 | 6  | TIMP2/SORL1/MIR199A1/MBP/MIR24-2/MIR199A2                                                                                                         |
| Biological Process | GO:1905508 | protein localization to microtubule organizing center          | 6/2279  | 33/18866  | 0.2018785 | 0.5338711 | 0.4830655 | 6  | CSNK1D/DISC1/DCTN2/NUMA1/SPAG5/CEP72                                                                                                              |
| Biological Process | GO:0035967 | cellular response to topologically incorrect protein           | 24/2279 | 166/18866 | 0.2019641 | 0.5338711 | 0.4830655 | 24 | DCTN1/CALR/ERN1/PIK3R1/AMFR/MBTPS1/RHBDD2/NCK2/YIF1A/CUL3/EDEM1/DERL2/ZBTB17/PDIA5/CLGN/POMT2/COP55/CREB3L2/NFE2L2/ADD1/KLHDC3/SEC31A/ACADVL/PRKN |
| Biological Process | GO:0009583 | detection of light stimulus                                    | 12/2279 | 76/18866  | 0.2022324 | 0.5338711 | 0.4830655 | 12 | RCVRN/PDE6A/CACNA2D4/CRB1/ARRB1/PITPNM1/CCDC66/GNAT2/GNA11/GRK7/EYS/CABP4                                                                         |

|                    |            |                                                           |         |           |           |           |           |    |                                                                                                                                                                                   |
|--------------------|------------|-----------------------------------------------------------|---------|-----------|-----------|-----------|-----------|----|-----------------------------------------------------------------------------------------------------------------------------------------------------------------------------------|
| Biological Process | GO:1901215 | negative regulation of neuron death                       | 30/2279 | 212/18866 | 0.2023384 | 0.5338711 | 0.4830655 | 30 | SORL1/IL10/CREB1/ANGPT1/TNFRSF1B/ARRB1/TRAF2/FBXO7/HIPK2/ITSN1/UNC5B/HLA-F/ILK/SYNGAP1/CSF3/GRN/PRKCI/ARRB2/NTRK1/BCL2/MEF2C/F2R/CEBPB/BCL2L1/TYRO3/CRLF1/NTF4/CX3CR1/EIF4G1/PRKN |
| Biological Process | GO:0001990 | regulation of systemic arterial blood pressure by hormone | 7/2279  | 40/18866  | 0.202375  | 0.5338711 | 0.4830655 | 7  | CTSZ/CTSG/GJA5/F2R/AGTR1/HSD11B2/AOPEP                                                                                                                                            |
| Biological Process | GO:0006284 | base-excision repair                                      | 7/2279  | 40/18866  | 0.202375  | 0.5338711 | 0.4830655 | 7  | FAM168A/POLE/NEIL3/UNG/NTHL1/MUTYH/XPA                                                                                                                                            |
| Biological Process | GO:0009126 | purine nucleoside monophosphate metabolic process         | 7/2279  | 40/18866  | 0.202375  | 0.5338711 | 0.4830655 | 7  | AMPD3/TJP2/GUK1/AK2/GMPR2/LHPP/IMPDH1                                                                                                                                             |
| Biological Process | GO:0010939 | regulation of necrotic cell death                         | 7/2279  | 40/18866  | 0.202375  | 0.5338711 | 0.4830655 | 7  | MIR101-2/RIPK1/RIPK3/ARHGEF2/CYLD/FADD/PELI1                                                                                                                                      |
| Biological Process | GO:0034314 | Arp2/3 complex-mediated actin nucleation                  | 7/2279  | 40/18866  | 0.202375  | 0.5338711 | 0.4830655 | 7  | TRIM27/WHAMM/WASL/GMFB/NCKAP1/CYFIP1/GMFG                                                                                                                                         |
| Biological Process | GO:0046636 | negative regulation of alpha-beta T cell activation       | 7/2279  | 40/18866  | 0.202375  | 0.5338711 | 0.4830655 | 7  | RUNX1/LOXL3/SMAD7/ZBTB7B/HLX/RUNX3/VSIR                                                                                                                                           |
| Biological Process | GO:0050691 | regulation of defense response to virus by host           | 7/2279  | 40/18866  | 0.202375  | 0.5338711 | 0.4830655 | 7  | IL27/AIM2/TNFAIP3/ZDHHC1/TRAF3IP2/PARP9/STING1                                                                                                                                    |
| Biological Process | GO:0090184 | positive regulation of kidney development                 | 7/2279  | 40/18866  | 0.202375  | 0.5338711 | 0.4830655 | 7  | PAX2/PDGFD/IL6R/PDGFB/PDGFRB/LIF/HOXB7                                                                                                                                            |

|                    |            |                                                                                                                   |        |          |           |           |           |   |                                                 |
|--------------------|------------|-------------------------------------------------------------------------------------------------------------------|--------|----------|-----------|-----------|-----------|---|-------------------------------------------------|
| Biological Process | GO:1902742 | apoptotic process involved in development                                                                         | 7/2279 | 40/18866 | 0.202375  | 0.5338711 | 0.4830655 | 7 | TNFRSF1B/VDR/TNFRSF1A/PAX2/NOTCH1/PPP2R1B/SLIT3 |
| Biological Process | GO:1902991 | regulation of amyloid precursor protein catabolic process                                                         | 7/2279 | 40/18866 | 0.202375  | 0.5338711 | 0.4830655 | 7 | SORL1/TNF/ABCG1/BIN1/APP/CLU/RELA               |
| Biological Process | GO:0002248 | connective tissue replacement involved in inflammatory response wound healing                                     | 2/2279 | 7/18866  | 0.2033338 | 0.5338711 | 0.4830655 | 2 | TGFB1/F2R                                       |
| Biological Process | GO:0002396 | MHC protein complex assembly                                                                                      | 2/2279 | 7/18866  | 0.2033338 | 0.5338711 | 0.4830655 | 2 | HLA-DMB/CALR                                    |
| Biological Process | GO:0002606 | positive regulation of dendritic cell antigen processing and presentation                                         | 2/2279 | 7/18866  | 0.2033338 | 0.5338711 | 0.4830655 | 2 | SLC11A1/NOD2                                    |
| Biological Process | GO:0003256 | regulation of transcription from RNA polymerase II promoter involved in myocardial precursor cell differentiation | 2/2279 | 7/18866  | 0.2033338 | 0.5338711 | 0.4830655 | 2 | RBPJ/NOTCH1                                     |
| Biological Process | GO:0006573 | valine metabolic process                                                                                          | 2/2279 | 7/18866  | 0.2033338 | 0.5338711 | 0.4830655 | 2 | ACAD8/HIBADH                                    |
| Biological Process | GO:0009445 | putrescine metabolic process                                                                                      | 2/2279 | 7/18866  | 0.2033338 | 0.5338711 | 0.4830655 | 2 | ODC1/SAT2                                       |
| Biological Process | GO:0009992 | cellular water homeostasis                                                                                        | 2/2279 | 7/18866  | 0.2033338 | 0.5338711 | 0.4830655 | 2 | AQP1/ANXA7                                      |

|                    |            |                                                            |        |         |           |           |           |   |                 |
|--------------------|------------|------------------------------------------------------------|--------|---------|-----------|-----------|-----------|---|-----------------|
| Biological Process | GO:0010216 | maintenance of DNA methylation                             | 2/2279 | 7/18866 | 0.2033338 | 0.5338711 | 0.4830655 | 2 | UHRF1/DNMT1     |
| Biological Process | GO:0010536 | positive regulation of activation of Janus kinase activity | 2/2279 | 7/18866 | 0.2033338 | 0.5338711 | 0.4830655 | 2 | CCL5/IL6R       |
| Biological Process | GO:0015727 | lactate transport                                          | 2/2279 | 7/18866 | 0.2033338 | 0.5338711 | 0.4830655 | 2 | SLC16A3/SLC16A1 |
| Biological Process | GO:0015825 | L-serine transport                                         | 2/2279 | 7/18866 | 0.2033338 | 0.5338711 | 0.4830655 | 2 | SLC1A5/SFXN1    |
| Biological Process | GO:0015871 | choline transport                                          | 2/2279 | 7/18866 | 0.2033338 | 0.5338711 | 0.4830655 | 2 | SLC44A4/SEC14L1 |
| Biological Process | GO:0019065 | receptor-mediated endocytosis of virus by host cell        | 2/2279 | 7/18866 | 0.2033338 | 0.5338711 | 0.4830655 | 2 | TPCN2/EPS15     |
| Biological Process | GO:0019401 | alditol biosynthetic process                               | 2/2279 | 7/18866 | 0.2033338 | 0.5338711 | 0.4830655 | 2 | PGP/PCK2        |
| Biological Process | GO:0019673 | GDP-mannose metabolic process                              | 2/2279 | 7/18866 | 0.2033338 | 0.5338711 | 0.4830655 | 2 | GUK1/PMM2       |
| Biological Process | GO:0021957 | corticospinal tract morphogenesis                          | 2/2279 | 7/18866 | 0.2033338 | 0.5338711 | 0.4830655 | 2 | ZEB2/CDH11      |

|                    |            |                                                                        |        |         |           |           |           |   |                |
|--------------------|------------|------------------------------------------------------------------------|--------|---------|-----------|-----------|-----------|---|----------------|
| Biological Process | GO:0030174 | regulation of DNA-dependent DNA replication initiation                 | 2/2279 | 7/18866 | 0.2033338 | 0.5338711 | 0.4830655 | 2 | WRNIP1/KAT7    |
| Biological Process | GO:0030578 | PML body organization                                                  | 2/2279 | 7/18866 | 0.2033338 | 0.5338711 | 0.4830655 | 2 | HIPK2/ETS1     |
| Biological Process | GO:0032226 | positive regulation of synaptic transmission, dopaminergic             | 2/2279 | 7/18866 | 0.2033338 | 0.5338711 | 0.4830655 | 2 | ARRB2/FLOT1    |
| Biological Process | GO:0032466 | negative regulation of cytokinesis                                     | 2/2279 | 7/18866 | 0.2033338 | 0.5338711 | 0.4830655 | 2 | E2F7/ZFYVE19   |
| Biological Process | GO:0032483 | regulation of Rab protein signal transduction                          | 2/2279 | 7/18866 | 0.2033338 | 0.5338711 | 0.4830655 | 2 | DENND1A/DENND3 |
| Biological Process | GO:0032510 | endosome to lysosome transport via multivesicular body sorting pathway | 2/2279 | 7/18866 | 0.2033338 | 0.5338711 | 0.4830655 | 2 | LYST/MVB12A    |
| Biological Process | GO:0032532 | regulation of microvillus length                                       | 2/2279 | 7/18866 | 0.2033338 | 0.5338711 | 0.4830655 | 2 | CDHR2/EZR      |
| Biological Process | GO:0032847 | regulation of cellular pH reduction                                    | 2/2279 | 7/18866 | 0.2033338 | 0.5338711 | 0.4830655 | 2 | BCL2/UBE3A     |
| Biological Process | GO:0032960 | regulation of inositol trisphosphate biosynthetic process              | 2/2279 | 7/18866 | 0.2033338 | 0.5338711 | 0.4830655 | 2 | P2RY6/HRH1     |

|                    |            |                                                             |        |         |           |           |           |   |                 |
|--------------------|------------|-------------------------------------------------------------|--------|---------|-----------|-----------|-----------|---|-----------------|
| Biological Process | GO:0033029 | regulation of neutrophil apoptotic process                  | 2/2279 | 7/18866 | 0.2033338 | 0.5338711 | 0.4830655 | 2 | PIK3CD/ITPKB    |
| Biological Process | GO:0033864 | positive regulation of NAD(P)H oxidase activity             | 2/2279 | 7/18866 | 0.2033338 | 0.5338711 | 0.4830655 | 2 | GNAI2/AGTR1     |
| Biological Process | GO:0035280 | miRNA loading onto RISC involved in gene silencing by miRNA | 2/2279 | 7/18866 | 0.2033338 | 0.5338711 | 0.4830655 | 2 | AGO1/AGO2       |
| Biological Process | GO:0035405 | histone-threonine phosphorylation                           | 2/2279 | 7/18866 | 0.2033338 | 0.5338711 | 0.4830655 | 2 | PRKCA/PRKCB     |
| Biological Process | GO:0035873 | lactate transmembrane transport                             | 2/2279 | 7/18866 | 0.2033338 | 0.5338711 | 0.4830655 | 2 | SLC16A3/SLC16A1 |
| Biological Process | GO:0040009 | regulation of growth rate                                   | 2/2279 | 7/18866 | 0.2033338 | 0.5338711 | 0.4830655 | 2 | GHRL/NOTCH1     |
| Biological Process | GO:0045002 | double-strand break repair via single-strand annealing      | 2/2279 | 7/18866 | 0.2033338 | 0.5338711 | 0.4830655 | 2 | RAD52/SLX4      |
| Biological Process | GO:0045110 | intermediate filament bundle assembly                       | 2/2279 | 7/18866 | 0.2033338 | 0.5338711 | 0.4830655 | 2 | PKP1/NEFM       |
| Biological Process | GO:0045162 | clustering of voltage-gated sodium channels                 | 2/2279 | 7/18866 | 0.2033338 | 0.5338711 | 0.4830655 | 2 | SPTBN4/GLDN     |

|                    |            |                                                                    |        |         |           |           |           |   |               |
|--------------------|------------|--------------------------------------------------------------------|--------|---------|-----------|-----------|-----------|---|---------------|
| Biological Process | GO:0050942 | positive regulation of pigment cell differentiation                | 2/2279 | 7/18866 | 0.2033338 | 0.5338711 | 0.4830655 | 2 | ZEB2/BCL2     |
| Biological Process | GO:0051388 | positive regulation of neurotrophin TRK receptor signaling pathway | 2/2279 | 7/18866 | 0.2033338 | 0.5338711 | 0.4830655 | 2 | CYFIP2/CYFIP1 |
| Biological Process | GO:0051458 | corticotropin secretion                                            | 2/2279 | 7/18866 | 0.2033338 | 0.5338711 | 0.4830655 | 2 | CRHBP/GHRL    |
| Biological Process | GO:0051694 | pointed-end actin filament capping                                 | 2/2279 | 7/18866 | 0.2033338 | 0.5338711 | 0.4830655 | 2 | TMOD3/TMOD1   |
| Biological Process | GO:0051902 | negative regulation of mitochondrial depolarization                | 2/2279 | 7/18866 | 0.2033338 | 0.5338711 | 0.4830655 | 2 | HSH2D/BCL2    |
| Biological Process | GO:0060331 | negative regulation of response to interferon-gamma                | 2/2279 | 7/18866 | 0.2033338 | 0.5338711 | 0.4830655 | 2 | PPARG/NR1H2   |
| Biological Process | GO:0060336 | negative regulation of interferon-gamma-mediated signaling pathway | 2/2279 | 7/18866 | 0.2033338 | 0.5338711 | 0.4830655 | 2 | PPARG/NR1H2   |
| Biological Process | GO:0060839 | endothelial cell fate commitment                                   | 2/2279 | 7/18866 | 0.2033338 | 0.5338711 | 0.4830655 | 2 | DLL1/RBPJ     |
| Biological Process | GO:0061002 | negative regulation of dendritic spine morphogenesis               | 2/2279 | 7/18866 | 0.2033338 | 0.5338711 | 0.4830655 | 2 | DNM3/UBE3A    |



|                    |            |                                                          |        |         |           |           |           |   |                |
|--------------------|------------|----------------------------------------------------------|--------|---------|-----------|-----------|-----------|---|----------------|
| Biological Process | GO:0061518 | microglial cell proliferation                            | 2/2279 | 7/18866 | 0.2033338 | 0.5338711 | 0.4830655 | 2 | CSF1R/CLU      |
| Biological Process | GO:0061724 | lipophagy                                                | 2/2279 | 7/18866 | 0.2033338 | 0.5338711 | 0.4830655 | 2 | SPTLC2/HTT     |
| Biological Process | GO:0071072 | negative regulation of phospholipid biosynthetic process | 2/2279 | 7/18866 | 0.2033338 | 0.5338711 | 0.4830655 | 2 | LPCAT1/PDGFB   |
| Biological Process | GO:0071286 | cellular response to magnesium ion                       | 2/2279 | 7/18866 | 0.2033338 | 0.5338711 | 0.4830655 | 2 | SLFN14/SLC41A1 |
| Biological Process | GO:0071455 | cellular response to hyperoxia                           | 2/2279 | 7/18866 | 0.2033338 | 0.5338711 | 0.4830655 | 2 | PPARG/FOXO1    |
| Biological Process | GO:0071918 | urea transmembrane transport                             | 2/2279 | 7/18866 | 0.2033338 | 0.5338711 | 0.4830655 | 2 | AQP3/AQP9      |
| Biological Process | GO:0072383 | plus-end-directed vesicle transport along microtubule    | 2/2279 | 7/18866 | 0.2033338 | 0.5338711 | 0.4830655 | 2 | KIF13A/KIFAP3  |
| Biological Process | GO:0075509 | endocytosis involved in viral entry into host cell       | 2/2279 | 7/18866 | 0.2033338 | 0.5338711 | 0.4830655 | 2 | TPCN2/EPS15    |
| Biological Process | GO:0097211 | cellular response to gonadotropin-releasing hormone      | 2/2279 | 7/18866 | 0.2033338 | 0.5338711 | 0.4830655 | 2 | RAP1B/CRHBP    |

|                    |            |                                                                                        |        |         |           |           |           |   |                 |
|--------------------|------------|----------------------------------------------------------------------------------------|--------|---------|-----------|-----------|-----------|---|-----------------|
| Biological Process | GO:0098910 | regulation of atrial cardiac muscle cell action potential                              | 2/2279 | 7/18866 | 0.2033338 | 0.5338711 | 0.4830655 | 2 | GJA5/ANK2       |
| Biological Process | GO:0150003 | regulation of spontaneous synaptic transmission                                        | 2/2279 | 7/18866 | 0.2033338 | 0.5338711 | 0.4830655 | 2 | APP/PRKN        |
| Biological Process | GO:1900038 | negative regulation of cellular response to hypoxia                                    | 2/2279 | 7/18866 | 0.2033338 | 0.5338711 | 0.4830655 | 2 | ENO1/NOL3       |
| Biological Process | GO:1901098 | positive regulation of autophagosome maturation                                        | 2/2279 | 7/18866 | 0.2033338 | 0.5338711 | 0.4830655 | 2 | UVRAG/CLEC16A   |
| Biological Process | GO:1901388 | regulation of transforming growth factor beta activation                               | 2/2279 | 7/18866 | 0.2033338 | 0.5338711 | 0.4830655 | 2 | LTBP1/ITGB6     |
| Biological Process | GO:1901525 | negative regulation of mitophagy                                                       | 2/2279 | 7/18866 | 0.2033338 | 0.5338711 | 0.4830655 | 2 | CLEC16A/TSC2    |
| Biological Process | GO:1901642 | nucleoside transmembrane transport                                                     | 2/2279 | 7/18866 | 0.2033338 | 0.5338711 | 0.4830655 | 2 | SLC29A3/SLC29A1 |
| Biological Process | GO:1902231 | positive regulation of intrinsic apoptotic signaling pathway in response to DNA damage | 2/2279 | 7/18866 | 0.2033338 | 0.5338711 | 0.4830655 | 2 | NACC2/FBH1      |
| Biological Process | GO:1902803 | regulation of synaptic vesicle transport                                               | 2/2279 | 7/18866 | 0.2033338 | 0.5338711 | 0.4830655 | 2 | CNIH2/PRKN      |

|                    |            |                                                                                 |        |         |           |           |           |   |                |
|--------------------|------------|---------------------------------------------------------------------------------|--------|---------|-----------|-----------|-----------|---|----------------|
| Biological Process | GO:1903430 | negative regulation of cell maturation                                          | 2/2279 | 7/18866 | 0.2033338 | 0.5338711 | 0.4830655 | 2 | BCL11A/NPPC    |
| Biological Process | GO:1903998 | regulation of eating behavior                                                   | 2/2279 | 7/18866 | 0.2033338 | 0.5338711 | 0.4830655 | 2 | GHRL/TTC21B    |
| Biological Process | GO:1904026 | regulation of collagen fibril organization                                      | 2/2279 | 7/18866 | 0.2033338 | 0.5338711 | 0.4830655 | 2 | AEBP1/RB1      |
| Biological Process | GO:1904587 | response to glycoprotein                                                        | 2/2279 | 7/18866 | 0.2033338 | 0.5338711 | 0.4830655 | 2 | EDEM1/EDEM2    |
| Biological Process | GO:1905449 | regulation of Fc-gamma receptor signaling pathway involved in phagocytosis      | 2/2279 | 7/18866 | 0.2033338 | 0.5338711 | 0.4830655 | 2 | PTPRJ/PTPRC    |
| Biological Process | GO:1905460 | negative regulation of vascular associated smooth muscle cell apoptotic process | 2/2279 | 7/18866 | 0.2033338 | 0.5338711 | 0.4830655 | 2 | MIR138-2/DNMT1 |
| Biological Process | GO:1905603 | regulation of blood-brain barrier permeability                                  | 2/2279 | 7/18866 | 0.2033338 | 0.5338711 | 0.4830655 | 2 | TJP2/ANGPT1    |
| Biological Process | GO:1990144 | intrinsic apoptotic signaling pathway in response to hypoxia                    | 2/2279 | 7/18866 | 0.2033338 | 0.5338711 | 0.4830655 | 2 | ENO1/NOL3      |
| Biological Process | GO:2000553 | positive regulation of T-helper 2 cell cytokine production                      | 2/2279 | 7/18866 | 0.2033338 | 0.5338711 | 0.4830655 | 2 | PRKCZ/NLRP3    |

|                    |            |                                                                                 |         |           |           |           |           |    |                                                                                                                       |
|--------------------|------------|---------------------------------------------------------------------------------|---------|-----------|-----------|-----------|-----------|----|-----------------------------------------------------------------------------------------------------------------------|
| Biological Process | GO:2000660 | negative regulation of interleukin-1-mediated signaling pathway                 | 2/2279  | 7/18866   | 0.2033338 | 0.5338711 | 0.4830655 | 2  | MIR27A/IL1RN                                                                                                          |
| Biological Process | GO:2001033 | negative regulation of double-strand break repair via nonhomologous end joining | 2/2279  | 7/18866   | 0.2033338 | 0.5338711 | 0.4830655 | 2  | TFIP11/CYREN                                                                                                          |
| Biological Process | GO:0006094 | gluconeogenesis                                                                 | 14/2279 | 91/18866  | 0.2051844 | 0.5338711 | 0.4830655 | 14 | MAEA/ENO1/C1QTNF3/PGP/PGAM1/PC/DGKQ/ENO3/PER2/PCK2/FOXO1/SOGA1/SLC25A1/SDHAF3                                         |
| Biological Process | GO:0046849 | bone remodeling                                                                 | 14/2279 | 91/18866  | 0.2051844 | 0.5338711 | 0.4830655 | 14 | DEF8/INPP5D/LRP5L/PRKCA/UBASH3B/TNFAIP3/CSF1R/TGFB1/NF1/LRRK1/ITGB3/TMEM64/CSK/PLEKHM1                                |
| Biological Process | GO:1904063 | negative regulation of cation transmembrane transport                           | 14/2279 | 91/18866  | 0.2051844 | 0.5338711 | 0.4830655 | 14 | KCNE1/THADA/CASQ2/TLR9/BIN1/SLC43A2/CAB39/GSTO1/PRKCE/SLC43A1/NEDD4/DYSF/HECW2/CBARP                                  |
| Biological Process | GO:0071331 | cellular response to hexose stimulus                                            | 20/2279 | 136/18866 | 0.2053008 | 0.5338711 | 0.4830655 | 20 | NADK/SLC2A5/LRP5L/ERN1/ARRB1/GPLD1/IGF1R/PTPRN2/PAX2/ENY2/GHRL/KLF7/FIS1/PIH1D1/PRKCE/CPB2/PCK2/SLC29A1/C2CD2L/PRKAA1 |
| Biological Process | GO:0060038 | cardiac muscle cell proliferation                                               | 11/2279 | 69/18866  | 0.206438  | 0.5338711 | 0.4830655 | 11 | RXRA/MIR199A1/VGLL4/TGFBR2/RIPK1/RBPJ/FGFR1/MEIS1/MIR199A2/NOTCH1/MEF2C                                               |
| Biological Process | GO:0061371 | determination of heart left/right asymmetry                                     | 11/2279 | 69/18866  | 0.206438  | 0.5338711 | 0.4830655 | 11 | SMAD3/SUFU/MICAL2/TGFBR2/DLL1/MIB1/ENG/NOTCH1/MEF2C/TMED2/NODAL                                                       |
| Biological Process | GO:0071230 | cellular response to amino acid stimulus                                        | 11/2279 | 69/18866  | 0.206438  | 0.5338711 | 0.4830655 | 11 | RPTOR/TNF/BCL11A/BAIAP2/PDGFD/CPEB3/SH3BP4/DNMT1/PDGFC/CEBPB/BCL2L1                                                   |

|                    |            |                                                           |         |           |           |           |           |    |                                                                                                                                                                                                                                                                      |
|--------------------|------------|-----------------------------------------------------------|---------|-----------|-----------|-----------|-----------|----|----------------------------------------------------------------------------------------------------------------------------------------------------------------------------------------------------------------------------------------------------------------------|
| Biological Process | GO:0032675 | regulation of interleukin-6 production                    | 23/2279 | 159/18866 | 0.2072956 | 0.5338711 | 0.4830655 | 23 | IL10/IL16/C1QTNF3/MIR140/ARRB1/TNF/TNFAIP3/MIR101-2/TLR9/SPON2/CSAR2/APP/MBP/PTPN6/SCIMP/GHRL/CSK/IL6R/ARRB2/NOD2/POU2F2/F2R/ARHGEF2                                                                                                                                 |
| Biological Process | GO:0072331 | signal transduction by p53 class mediator                 | 37/2279 | 267/18866 | 0.2085005 | 0.5338711 | 0.4830655 | 37 | SPRED2/BLM/PRKAG2/TFDP1/BRCA2/RMI2/NDRG1/HUS1/HIPK2/E2F7/PCBP4/RRM2B/EHMT2/ZNF385A/PRKAB1/TAF10/HDAC1/ARID3A/PERP/CDIP1/DYRK2/MTA2/ANKRD2/BCL2/S<br>P100/RHNO1/FOXO1/CHEK2/TP53BP2/ANKRD1/BCL3/HEXIM1/ING5/PAXIP1/PRKAA1/PRKN/MARCHF7                                |
| Biological Process | GO:0006403 | RNA localization                                          | 33/2279 | 236/18866 | 0.2085787 | 0.5338711 | 0.4830655 | 33 | NXF1/FIP1L1/TNKS/EXOSC2/CPSF3/SETD2/RAE1/TGFBR2/ZNF385A/SMG7/PABPN1/ENY2/BICD2/NUP93/IGF2BP3/SEC13/KIF5C/SMG6/SNUPN/PIH1D1/MYO1C/PRPF6/HHEX/ZC3H3/R<br>BM15B/RUVBL1/NOL6/CPSF4/FLOT1/CCT6A/FBL/PCID2/NCBP3                                                           |
| Biological Process | GO:0044242 | cellular lipid catabolic process                          | 33/2279 | 236/18866 | 0.2085787 | 0.5338711 | 0.4830655 | 33 | PNPLA2/PLA2G15/SORL1/MGLL/PLBD2/MFSD2A/HEXB/LIPC/ABHD16A/AMACR/GPLD1/GALC/SMPDL3B/AOAH/ACOXL/CYP4F3/ACADM/ACACB/MGST2/ABHD16B/FABP6/ACO2/ABH<br>D5/PCK2/ACAT1/PLCG1/ADTRP/CPT1A/PDXDC1/INPP5F/LPIN1/LYPLA2/ACADVL                                                    |
| Biological Process | GO:0046434 | organophosphate catabolic process                         | 21/2279 | 144/18866 | 0.209232  | 0.5338711 | 0.4830655 | 21 | PDE4D/PLA2G15/SYNJ2/AMPD3/PLBD2/INPP5A/LIPC/ABHD16A/SMPDL3B/NUDT3/ACOT7/UNG/NTHL1/ABHD16B/INPP5E/IMPA2/PDE9A/PNP/ACAT1/PLCG1/INPP5F                                                                                                                                  |
| Biological Process | GO:0060078 | regulation of postsynaptic membrane potential             | 21/2279 | 144/18866 | 0.209232  | 0.5338711 | 0.4830655 | 21 | PRKCZ/SSH1/ZMYND8/BAIAP2/APP/GRIK4/NRXN1/GHRL/SH3GL1/MAPK8IP2/ARRB2/S1PR2/GABBR1/P2RX1/MEF2C/SHANK2/SLC29A1/P2RX5/GRID1/CUX2/FGF14                                                                                                                                   |
| Biological Process | GO:1902850 | microtubule cytoskeleton organization involved in mitosis | 21/2279 | 144/18866 | 0.209232  | 0.5338711 | 0.4830655 | 21 | ARHGEF10/DCTN1/TNKS/NDE1/SETD2/RAE1/RCC1/DYNC1H1/POC1A/DCTN2/TACC3/STAG1/HTT/NUMA1/MSTO1/CHEK2/ARHGEF2/FBXW11/NDEL1/PTPA/ABRAXAS1                                                                                                                                    |
| Biological Process | GO:0050886 | endocrine process                                         | 13/2279 | 84/18866  | 0.2100938 | 0.5338711 | 0.4830655 | 13 | CTSZ/CTSG/C1QTNF3/RAB11FIP1/GJA5/FGFR1/CRHBP/GHRL/F2R/AGTR1/HSD11B2/INHBA/AOPEP                                                                                                                                                                                      |
| Biological Process | GO:0046879 | hormone secretion                                         | 43/2279 | 314/18866 | 0.2101811 | 0.5338711 | 0.4830655 | 43 | NADK/C1QTNF3/ITPR2/MYRIP/CREB1/MYB/CACNA1C/LRP5L/RAB11FIP1/ARRB1/PRKCA/GPLD1/TNF/CCL5/ITSN1/ITPR1/RFX3/TCF7L2/HNF1A/PTPRN2/FGFR1/IL1RN/CRHBP/ENY2/MY<br>O5A/GIPR/BLK/GHRL/KLF7/ARNTL/PER2/SLC16A1/PRKCE/AGTR1/SLC2A1/SREBF1/CPT1A/RPH3AL/INHBA/LIF/C2CD2L/SIRT3/PRKN |

|                    |            |                                                              |         |           |           |           |           |    |                                                                                                                                                                                                                                                                        |
|--------------------|------------|--------------------------------------------------------------|---------|-----------|-----------|-----------|-----------|----|------------------------------------------------------------------------------------------------------------------------------------------------------------------------------------------------------------------------------------------------------------------------|
| Biological Process | GO:0048857 | neural nucleus development                                   | 10/2279 | 62/18866  | 0.2105171 | 0.5338711 | 0.4830655 | 10 | YWHAH/PHOX2A/PADI2/MBP/KIRREL3/SYNGR3/BCL2/YWHAQ/SYPL2/NDRG2                                                                                                                                                                                                           |
| Biological Process | GO:0051851 | modulation by host of symbiont process                       | 10/2279 | 62/18866  | 0.2105171 | 0.5338711 | 0.4830655 | 10 | CTDP1/CCL5/CSF1R/SFTPD/HDAC1/PC/PHB/AQP1/LTF/PRKN                                                                                                                                                                                                                      |
| Biological Process | GO:2000351 | regulation of endothelial cell apoptotic process             | 10/2279 | 62/18866  | 0.2105171 | 0.5338711 | 0.4830655 | 10 | ANGPT1/TNF/TNFAIP3/MIR101-2/THBS1/MIR24-2/PRKCI/NFE2L2/ANO6/PLCG1                                                                                                                                                                                                      |
| Biological Process | GO:0001822 | kidney development                                           | 39/2279 | 283/18866 | 0.2114564 | 0.5338711 | 0.4830655 | 39 | ARID5B/TACSTD2/ANGPT1/SMAD3/ZBTB16/ODC1/RRM2B/CTSH/DLL1/ILK/SMAD7/WNT11/PAX2/FGFR1/OVOL1/RDH10/RARA/NF1/PDGFD/KIRREL3/MTSS1/BMPER/WWTR1/IL6R/PDGFB/CAT/BCL2/NOTCH1/MEF2C/GPR4/AGTR1/PDGFRB/ACAT1/CRLF1/ALDH1A2/LIF/HOXB7/FADD/CPLANE1                                  |
| Biological Process | GO:0016579 | protein deubiquitination                                     | 39/2279 | 283/18866 | 0.2114564 | 0.5338711 | 0.4830655 | 39 | FOXK1/WDR20/NLRP3/SMAD3/TRAF2/TNFAIP3/USP3/USP36/SNX3/RIPK1/OTUB2/TAF10/SMAD7/CDC25A/MBD6/ENY2/COPS5/KDM1B/TNIP1/VCPIP1/PSMF1/ARRB2/CCNA1/OTUB1/CLSPN/USP49/PSMB7/USP54/MBD5/USP2/CYLD/RUVBL1/UCHL3/PSMD13/USP35/PRKN/MINDY1/ABRAXAS1/BABAM2                           |
| Biological Process | GO:0043255 | regulation of carbohydrate biosynthetic process              | 15/2279 | 99/18866  | 0.2115453 | 0.5338711 | 0.4830655 | 15 | MAEA/AP2A1/C1QTNF3/PGP/P2RY6/TGFB1/HRH1/DGKQ/DYRK2/PDGFB/PPP1CB/ESRRB/FOXO1/SOGA1/SDHAF3                                                                                                                                                                               |
| Biological Process | GO:0062207 | regulation of pattern recognition receptor signaling pathway | 15/2279 | 99/18866  | 0.2115453 | 0.5338711 | 0.4830655 | 15 | GFI1/GRAMD4/MIR140/SMPDL3B/TNFAIP3/TLR9/RTN4/TREML4/SEC14L1/ARRB2/WDFY1/LTF/TYRO3/FLOT1/PELI1                                                                                                                                                                          |
| Biological Process | GO:0001655 | urogenital system development                                | 45/2279 | 330/18866 | 0.2124256 | 0.5338711 | 0.4830655 | 45 | ARID5B/TACSTD2/RXRA/ANGPT1/SMAD3/EPHB3/ZBTB16/ODC1/RRM2B/CTSH/DLL1/ILK/SMAD7/WNT11/PAX2/FGFR1/OVOL1/RDH10/RARA/NF1/PDGFD/KIRREL3/MTSS1/BMPER/WWTR1/RARG/IL6R/PDGFB/CAT/BCL2/NOTCH1/MEF2C/UBE3A/GPR4/AGTR1/PDGFRB/CRIP1/ACAT1/CRLF1/ALDH1A2/LIF/HOXB7/FADD/NFIA/CPLANE1 |
| Biological Process | GO:0051028 | mRNA transport                                               | 22/2279 | 152/18866 | 0.2128332 | 0.5338711 | 0.4830655 | 22 | NXF1/FIP1L1/TNKS/CPSF3/SETD2/RAE1/SMG7/PABPN1/ENY2/BICD2/NUP93/IGF2BP3/SEC13/KIF5C/SMG6/MYO1C/HHEX/ZC3H3/RBM15B/CPSF4/PCID2/NCBP3                                                                                                                                      |

|                    |            |                                                  |         |           |           |           |           |    |                                                                                                                                                  |
|--------------------|------------|--------------------------------------------------|---------|-----------|-----------|-----------|-----------|----|--------------------------------------------------------------------------------------------------------------------------------------------------|
| Biological Process | GO:0007611 | learning or memory                               | 36/2279 | 260/18866 | 0.2137648 | 0.5338711 | 0.4830655 | 36 | PRKCZ/CREB1/PPP1R1B/PRKAR1B/AMFR/SGK1/TANC1/ATP8A1/ATXN1/SLC11A2/COMT/APP/ZNF385A/SYNGAP1/CRHBP/HRH1/NF1/NRXN1/CPEB3/HTT/GMFB/MEIS2/NRXN2/PLCB1/ |
|                    |            |                                                  |         |           |           |           |           |    | MAPK8IP2/NTRK1/MAP1A/MEF2C/SHANK2/CEBPB/NTAN1/NTF4/CX3CR1/CUX2/SYNPO/PRKN                                                                        |
| Biological Process | GO:1903362 | regulation of cellular protein catabolic process | 36/2279 | 260/18866 | 0.2137648 | 0.5338711 | 0.4830655 | 36 | TRIM39/RNF144A/FZR1/RNF19A/CSNK1D/SUFU/TNFAIP3/HIPK2/VGLL4/CBFA2T3/UBAC2/MGAT3/DISC1/EDEM1/DERL2/CLU/SMAD7/SMURF1/AXIN1/CLEC16A/EDEM2/CSNK1E/PSM |
|                    |            |                                                  |         |           |           |           |           |    | F1/NFE2L2/RNF144B/MAP1A/GNA12/UBE3A/RNF14/TRIB1/EZR/RNF40/BAG5/SVIP/PRKN/MARCHF7                                                                 |
| Biological Process | GO:0001706 | endoderm formation                               | 9/2279  | 55/18866  | 0.2143566 | 0.5338711 | 0.4830655 | 9  | SETD2/COL4A2/COL12A1/ITGB5/ITGB2/COL5A1/LAMB3/INHBA/NODAL                                                                                        |
| Biological Process | GO:0008347 | glial cell migration                             | 9/2279  | 55/18866  | 0.2143566 | 0.5338711 | 0.4830655 | 9  | AZU1/CD9/HEXB/CCR2/RTN4/DISC1/ZMIZ1/CERS2/CX3CR1                                                                                                 |
| Biological Process | GO:0014888 | striated muscle adaptation                       | 9/2279  | 55/18866  | 0.2143566 | 0.5338711 | 0.4830655 | 9  | HDAC4/GSN/SMAD3/MIR199A1/CAMTA2/MIR199A2/MEF2C/FOXO1/INPP5F                                                                                      |
| Biological Process | GO:0030199 | collagen fibril organization                     | 9/2279  | 55/18866  | 0.2143566 | 0.5338711 | 0.4830655 | 9  | LOXL3/TNXB/COL12A1/NF1/COL14A1/AEBP1/RB1/COL5A1/LOXL4                                                                                            |
| Biological Process | GO:0050819 | negative regulation of coagulation               | 9/2279  | 55/18866  | 0.2143566 | 0.5338711 | 0.4830655 | 9  | PLAU/CD9/UBASH3B/SERPINB2/THBS1/F12/PDGFB/CPB2/ADTRP                                                                                             |
| Biological Process | GO:0050879 | multicellular organismal movement                | 9/2279  | 55/18866  | 0.2143566 | 0.5338711 | 0.4830655 | 9  | VTI1A/HIPK2/TNNT3/ITPR1/JSRP1/GSTO1/MAP1A/CASQ1/MB                                                                                               |
| Biological Process | GO:0050881 | musculoskeletal movement                         | 9/2279  | 55/18866  | 0.2143566 | 0.5338711 | 0.4830655 | 9  | VTI1A/HIPK2/TNNT3/ITPR1/JSRP1/GSTO1/MAP1A/CASQ1/MB                                                                                               |

|                    |            |                                                          |         |           |           |           |           |    |                                                                                                                       |
|--------------------|------------|----------------------------------------------------------|---------|-----------|-----------|-----------|-----------|----|-----------------------------------------------------------------------------------------------------------------------|
| Biological Process | GO:0051452 | intracellular pH reduction                               | 9/2279  | 55/18866  | 0.2143566 | 0.5338711 | 0.4830655 | 9  | SLC11A1/ATP6V1B2/GRN/BCL2/ATP6V0B/UBE3A/CLN5/ATP6V0C/ATP6V1C1                                                         |
| Biological Process | GO:0071326 | cellular response to monosaccharide stimulus             | 20/2279 | 137/18866 | 0.2148429 | 0.5338711 | 0.4830655 | 20 | NADK/SLC2A5/LRP5L/ERN1/ARRB1/GPLD1/IGF1R/PTPRN2/PAX2/ENY2/GHRL/KLF7/FIS1/PIH1D1/PRKCE/CPB2/PCK2/SLC29A1/C2CD2L/PRKAA1 |
| Biological Process | GO:0060411 | cardiac septum morphogenesis                             | 12/2279 | 77/18866  | 0.215078  | 0.5338711 | 0.4830655 | 12 | ZFPM1/NRP2/GJA5/TGFBR2/RBPJ/SMAD7/WNT11/RARA/ENG/NOTCH1/SLIT3/NSD2                                                    |
| Biological Process | GO:0002577 | regulation of antigen processing and presentation        | 4/2279  | 20/18866  | 0.216049  | 0.5338711 | 0.4830655 | 4  | SLC11A1/THBS1/NOD2/CD68                                                                                               |
| Biological Process | GO:0003323 | type B pancreatic cell development                       | 4/2279  | 20/18866  | 0.216049  | 0.5338711 | 0.4830655 | 4  | RHEB/RFX3/DLL1/ARNTL                                                                                                  |
| Biological Process | GO:0010042 | response to manganese ion                                | 4/2279  | 20/18866  | 0.216049  | 0.5338711 | 0.4830655 | 4  | D2HGDH/SLFN14/APP/PRKN                                                                                                |
| Biological Process | GO:0010875 | positive regulation of cholesterol efflux                | 4/2279  | 20/18866  | 0.216049  | 0.5338711 | 0.4830655 | 4  | ABCG1/PLTP/NR1H2/ABCA1                                                                                                |
| Biological Process | GO:0010988 | regulation of low-density lipoprotein particle clearance | 4/2279  | 20/18866  | 0.216049  | 0.5338711 | 0.4830655 | 4  | MIR199A1/MIR27A/CSK/MIR199A2                                                                                          |
| Biological Process | GO:0022038 | corpus callosum development                              | 4/2279  | 20/18866  | 0.216049  | 0.5338711 | 0.4830655 | 4  | ZEB2/EPHB3/CORO1C/TSKU                                                                                                |



|                    |            |                                                |        |          |          |           |           |   |                              |
|--------------------|------------|------------------------------------------------|--------|----------|----------|-----------|-----------|---|------------------------------|
| Biological Process | GO:0032769 | negative regulation of monoxygenase activity   | 4/2279 | 20/18866 | 0.216049 | 0.5338711 | 0.4830655 | 4 | GFI1/CNR2/MIR138-2/NOSIP     |
| Biological Process | GO:0043046 | DNA methylation involved in gamete generation  | 4/2279 | 20/18866 | 0.216049 | 0.5338711 | 0.4830655 | 4 | PIWIL4/MOV10L1/KDM1B/MORC1   |
| Biological Process | GO:0043950 | positive regulation of cAMP-mediated signaling | 4/2279 | 20/18866 | 0.216049 | 0.5338711 | 0.4830655 | 4 | PRKCA/MRAP/RAPGEF2/GIPR      |
| Biological Process | GO:0046655 | folic acid metabolic process                   | 4/2279 | 20/18866 | 0.216049 | 0.5338711 | 0.4830655 | 4 | MTHFD1L/MTHFS/SLC19A1/MTHFD1 |
| Biological Process | GO:0046931 | pore complex assembly                          | 4/2279 | 20/18866 | 0.216049 | 0.5338711 | 0.4830655 | 4 | RTN4/PLEKHA7/NUP93/ANO6      |
| Biological Process | GO:0060039 | pericardium development                        | 4/2279 | 20/18866 | 0.216049 | 0.5338711 | 0.4830655 | 4 | SETD2/SMAD3/CCM2/NOTCH1      |
| Biological Process | GO:0060965 | negative regulation of gene silencing by miRNA | 4/2279 | 20/18866 | 0.216049 | 0.5338711 | 0.4830655 | 4 | PPARG/NCOR2/TNF/TGFB1        |
| Biological Process | GO:0071731 | response to nitric oxide                       | 4/2279 | 20/18866 | 0.216049 | 0.5338711 | 0.4830655 | 4 | DNM2/TRAF2/AQP1/FOXO1        |
| Biological Process | GO:0072234 | metanephric nephron tubule development         | 4/2279 | 20/18866 | 0.216049 | 0.5338711 | 0.4830655 | 4 | PAX2/WWTR1/ACAT1/LIF         |

|                    |            |                                                          |         |           |           |           |           |    |                                                                                                                                                                  |
|--------------------|------------|----------------------------------------------------------|---------|-----------|-----------|-----------|-----------|----|------------------------------------------------------------------------------------------------------------------------------------------------------------------|
| Biological Process | GO:0086014 | atrial cardiac muscle cell action potential              | 4/2279  | 20/18866  | 0.216049  | 0.5338711 | 0.4830655 | 4  | CACNA1C/GJA5/KCNQ1/ANK2                                                                                                                                          |
| Biological Process | GO:0086026 | atrial cardiac muscle cell to AV node cell signaling     | 4/2279  | 20/18866  | 0.216049  | 0.5338711 | 0.4830655 | 4  | CACNA1C/GJA5/KCNQ1/ANK2                                                                                                                                          |
| Biological Process | GO:0086066 | atrial cardiac muscle cell to AV node cell communication | 4/2279  | 20/18866  | 0.216049  | 0.5338711 | 0.4830655 | 4  | CACNA1C/GJA5/KCNQ1/ANK2                                                                                                                                          |
| Biological Process | GO:0097062 | dendritic spine maintenance                              | 4/2279  | 20/18866  | 0.216049  | 0.5338711 | 0.4830655 | 4  | ZMYND8/CTTN/TANC1/IGF1R                                                                                                                                          |
| Biological Process | GO:0097709 | connective tissue replacement                            | 4/2279  | 20/18866  | 0.216049  | 0.5338711 | 0.4830655 | 4  | MIR199A1/TGFB1/MIR199A2/F2R                                                                                                                                      |
| Biological Process | GO:1901741 | positive regulation of myoblast fusion                   | 4/2279  | 20/18866  | 0.216049  | 0.5338711 | 0.4830655 | 4  | EHD1/NFATC2/FLOT1/SCGB3A1                                                                                                                                        |
| Biological Process | GO:0007051 | spindle organization                                     | 26/2279 | 183/18866 | 0.2161774 | 0.5338711 | 0.4830655 | 26 | ARHGEF10/DCTN1/LIMK2/CSNK1D/TNKS/RAE1/RCC1/DYNC1H1/MYH9/UVRAG/POC1A/DCTN2/TACC3/STAG1/NUMA1/PPP2R1A/MSTO1/NEK6/CHEK2/SPAG5/TUBGCP2/CEP72/EZR/NTMT1/PTPA/ABRAXAS1 |
| Biological Process | GO:0071347 | cellular response to interleukin-1                       | 26/2279 | 183/18866 | 0.2161774 | 0.5338711 | 0.4830655 | 26 | VRK2/LCN2/TOLLIP/MAP3K3/CHI3L1/IL1R1/CCL5/ABCC2/MIR27A/RPS6KA4/IL1RN/UBE2V1/CCL20/PSMF1/PLCB1/IRAK2/OTUB1/NOD2/PSMB7/CEBPB/ANKRD1/RELA/FBXW11/CCL22/PELI1/PSMD13 |
| Biological Process | GO:0051928 | positive regulation of calcium ion transport             | 18/2279 | 122/18866 | 0.2163707 | 0.5338711 | 0.4830655 | 18 | MYLK/CCL5/P2RY6/SPHK2/HTT/PDGFB/ARRB2/GSTO1/F2R/PDGFRB/ANK2/PLCG1/P2RX5/TRPV2/CASQ1/FGF14/STIMATE/CRACR2A                                                        |

|                    |            |                                                                |         |           |           |           |           |    |                                                                                                                                                                       |
|--------------------|------------|----------------------------------------------------------------|---------|-----------|-----------|-----------|-----------|----|-----------------------------------------------------------------------------------------------------------------------------------------------------------------------|
| Biological Process | GO:0031341 | regulation of cell killing                                     | 14/2279 | 92/18866  | 0.2169563 | 0.5338711 | 0.4830655 | 14 | CD55/PIK3R6/CD226/HLA-F/NCR1/RIPK3/CD59/PTPRC/ARRB2/IL18RAP/DNASE1L3/CADM1/FADD/CYRIB                                                                                 |
| Biological Process | GO:0030330 | DNA damage response, signal transduction by p53 class mediator | 16/2279 | 107/18866 | 0.2171925 | 0.5338711 | 0.4830655 | 16 | SPRED2/TFDP1/BRCA2/NDRG1/HIPK2/E2F7/PCBP4/ZNF385A/ARID3A/SP100/FOXM1/CHEK2/ANKRD1/BCL3/PAXIP1/MARCH7                                                                  |
| Biological Process | GO:0034404 | nucleobase-containing small molecule biosynthetic process      | 16/2279 | 107/18866 | 0.2171925 | 0.5338711 | 0.4830655 | 16 | PDE4D/CDA/AMPD3/NUDT3/ACOT7/TK2/UNG/UCK2/NTHL1/PDE9A/PNP/GUK1/ACAT1/DHODH/TK1/IMPDH1                                                                                  |
| Biological Process | GO:0050905 | neuromuscular process                                          | 16/2279 | 107/18866 | 0.2171925 | 0.5338711 | 0.4830655 | 16 | ABR/DCTN1/KCNAB2/HEXB/OPA3/CDH23/APP/CAMTA1/SCN1A/NRXN1/BCR/SLC1A3/CNTNAP1/CHD8/SPART/PRKN                                                                            |
| Biological Process | GO:0055017 | cardiac muscle tissue growth                                   | 16/2279 | 107/18866 | 0.2171925 | 0.5338711 | 0.4830655 | 16 | RXRA/CTDP1/AKAP13/MIR199A1/VGLL4/CCM2L/TGFBR2/RIPK1/RBPJ/MIR24-2/MIR23A/FGFR1/MEIS1/MIR199A2/NOTCH1/MEF2C                                                             |
| Biological Process | GO:2001237 | negative regulation of extrinsic apoptotic signaling pathway   | 16/2279 | 107/18866 | 0.2171925 | 0.5338711 | 0.4830655 | 16 | ITPRIP/CTTN/TNF/TRAF2/TNFAIP3/UNC5B/THBS1/RIPK1/TCF7L2/HTT/NOL3/BCL2/ARHGEF2/BCL2L1/RELA/FADD                                                                         |
| Biological Process | GO:0043523 | regulation of neuron apoptotic process                         | 30/2279 | 214/18866 | 0.2175187 | 0.5338711 | 0.4830655 | 30 | HDAC4/CTSZ/IL10/MYB/ANGPT1/SRPK2/ARRB1/TNF/HIPK2/ITSN1/UNC5B/ILK/SYNGAP1/NF1/GRN/PRKCI/ARRB2/NTRK1/FIS1/BCL2/MEF2C/F2R/CEBPB/BCL2L1/TYRO3/CRLF1/NTF4/CX3CR1/NAE1/PRKN |
| Biological Process | GO:0002279 | mast cell activation involved in immune response               | 8/2279  | 48/18866  | 0.2177768 | 0.5338711 | 0.4830655 | 8  | LAT/PIK3CD/GAB2/FGR/CD84/SPHK2/FER/BLK                                                                                                                                |
| Biological Process | GO:0002820 | negative regulation of adaptive immune response                | 8/2279  | 48/18866  | 0.2177768 | 0.5338711 | 0.4830655 | 8  | TRIM27/LOXL3/DUSP22/HLA-F/PTPN6/SMAD7/ZBTB7B/PTPRC                                                                                                                    |

|                    |            |                                                    |         |           |           |           |           |    |                                                                                                                                                                                                                                            |
|--------------------|------------|----------------------------------------------------|---------|-----------|-----------|-----------|-----------|----|--------------------------------------------------------------------------------------------------------------------------------------------------------------------------------------------------------------------------------------------|
| Biological Process | GO:0031952 | regulation of protein autophosphorylation          | 8/2279  | 48/18866  | 0.2177768 | 0.5338711 | 0.4830655 | 8  | PPP2R5C/PDGFD/PTPRC/PDGFB/ENG/PPP2R5E/PPP2R5D/PDGFC                                                                                                                                                                                        |
| Biological Process | GO:0033628 | regulation of cell adhesion mediated by integrin   | 8/2279  | 48/18866  | 0.2177768 | 0.5338711 | 0.4830655 | 8  | PLAU/ITGB1BP1/CCL5/TESC/PTPN6/JAM3/PDE3B/LIF                                                                                                                                                                                               |
| Biological Process | GO:0002431 | Fc receptor mediated stimulatory signaling pathway | 21/2279 | 145/18866 | 0.2185911 | 0.5338711 | 0.4830655 | 21 | ELMO1/DOCK1/PIK3R1/WIPF1/FGR/CYFIP2/BAIAP2/CD226/WASL/PTPRJ/BLK/VAV2/PTPRC/ACTG1/CSK/NCKAP1/PRKCE/MYO1C/PLCG1/CYFIP1/VAV3                                                                                                                  |
| Biological Process | GO:0060538 | skeletal muscle organ development                  | 24/2279 | 168/18866 | 0.2191858 | 0.5338711 | 0.4830655 | 24 | HDAC4/MEF2D/SKI/MYH15/DLL1/PAX7/TGFB1/IGSF8/VAMP5/SVIL/NF1/ARNTL/MYOM1/ANKRD2/RB1/BCL2/NOTCH1/MEF2C/HLX/ANKRD1/FLOT1/CASQ1/PRKAA1/MYORG                                                                                                    |
| Biological Process | GO:0072001 | renal system development                           | 40/2279 | 292/18866 | 0.2193935 | 0.5338711 | 0.4830655 | 40 | ARID5B/TACSTD2/ANGPT1/SMAD3/ZBTB16/ODC1/RRM2B/CTSH/DLL1/ILK/SMAD7/WNT11/PAX2/FGFR1/OVOL1/RDH10/RARA/NF1/PDGFD/KIRREL3/MTSS1/BMPER/WWTR1/IL6R/PDGFB/CAT/BCL2/NOTCH1/MEF2C/GPR4/AGTR1/PDGFRB/ACAT1/CRLF1/ALDH1A2/LIF/HOXB7/FADD/NFIA/CPLANE1 |
| Biological Process | GO:0017157 | regulation of exocytosis                           | 31/2279 | 222/18866 | 0.2195328 | 0.5338711 | 0.4830655 | 31 | ABR/CD177/RAP1B/CCR2/GAB2/FGR/MICAL1/CD84/GIT1/RAB27A/GNAI2/HLA-F/APBA2/SPHK2/FER/PRKCB/VPS18/BLK/CHRM2/BCR/ITGB2/RALA/NOTCH1/P2RX1/DNM1L/PRAM1/SYT17/RPH3AL/DTNBP1/CBARP/PRKN                                                             |
| Biological Process | GO:0008088 | axo-dendritic transport                            | 11/2279 | 70/18866  | 0.2201069 | 0.5338711 | 0.4830655 | 11 | SPG7/DYNC1H1/APP/CNIH2/KIF5C/KIF1B/MAP1A/AP3D1/FBXW11/NDEL1/DTNBP1                                                                                                                                                                         |
| Biological Process | GO:0007212 | dopamine receptor signaling pathway                | 7/2279  | 41/18866  | 0.2204791 | 0.5338711 | 0.4830655 | 7  | KLF16/GNA11/PALM/ARRB2/GNG2/GNAO1/DTNBP1                                                                                                                                                                                                   |
| Biological Process | GO:0007618 | mating                                             | 7/2279  | 41/18866  | 0.2204791 | 0.5338711 | 0.4830655 | 7  | HDAC4/HEXB/PPP1R1B/APP/NCOA1/MAPK8IP2/P2RX1                                                                                                                                                                                                |

|                    |            |                                                                                         |        |          |           |           |           |   |                                                 |
|--------------------|------------|-----------------------------------------------------------------------------------------|--------|----------|-----------|-----------|-----------|---|-------------------------------------------------|
| Biological Process | GO:0031062 | positive regulation of histone methylation                                              | 7/2279 | 41/18866 | 0.2204791 | 0.5338711 | 0.4830655 | 7 | BRD4/MYB/PAX7/PHF19/DNMT1/PAXIP1/NSD3           |
| Biological Process | GO:0035136 | forelimb morphogenesis                                                                  | 7/2279 | 41/18866 | 0.2204791 | 0.5338711 | 0.4830655 | 7 | CACNA1C/ZBTB16/RDH10/RUNX2/HOXA9/ALX3/ALDH1A2   |
| Biological Process | GO:0042269 | regulation of natural killer cell mediated cytotoxicity                                 | 7/2279 | 41/18866 | 0.2204791 | 0.5338711 | 0.4830655 | 7 | PIK3R6/CD226/HLA-F/NCR1/ARRB2/IL18RAP/CADM1     |
| Biological Process | GO:0072524 | pyridine-containing compound metabolic process                                          | 7/2279 | 41/18866 | 0.2204791 | 0.5338711 | 0.4830655 | 7 | NADK/NMNAT3/PNP/PDXK/PARP10/PARP9/AOX1          |
| Biological Process | GO:0072528 | pyrimidine-containing compound biosynthetic process                                     | 7/2279 | 41/18866 | 0.2204791 | 0.5338711 | 0.4830655 | 7 | CDA/TK2/UCK2/AK5/DCTD/DHODH/TK1                 |
| Biological Process | GO:0099622 | cardiac muscle cell membrane repolarization                                             | 7/2279 | 41/18866 | 0.2204791 | 0.5338711 | 0.4830655 | 7 | KCNE1/GJA5/NOS1AP/WDR1/SNTA1/KCNQ1/ANK2         |
| Biological Process | GO:1902042 | negative regulation of extrinsic apoptotic signaling pathway via death domain receptors | 7/2279 | 41/18866 | 0.2204791 | 0.5338711 | 0.4830655 | 7 | ITPRIP/TRAF2/TNFAIP3/RIPK1/ARHGEF2/BCL2L1/FADD  |
| Biological Process | GO:1903170 | negative regulation of calcium ion transmembrane transport                              | 7/2279 | 41/18866 | 0.2204791 | 0.5338711 | 0.4830655 | 7 | THADA/CASQ2/TLR9/BIN1/GSTO1/DYSF/CBARP          |
| Biological Process | GO:1905209 | positive regulation of cardiocyte differentiation                                       | 7/2279 | 41/18866 | 0.2204791 | 0.5338711 | 0.4830655 | 7 | MIR145/MIR199A1/RBPJ/TGFB1/ARRB2/MIR199A2/MEF2C |

|                    |            |                                                        |        |          |           |           |           |   |                                 |
|--------------------|------------|--------------------------------------------------------|--------|----------|-----------|-----------|-----------|---|---------------------------------|
| Biological Process | GO:0007628 | adult walking behavior                                 | 5/2279 | 27/18866 | 0.2211679 | 0.5338711 | 0.4830655 | 5 | HIPK2/SCN1A/ARRB2/NPC1/SPTBN4   |
| Biological Process | GO:0008053 | mitochondrial fusion                                   | 5/2279 | 27/18866 | 0.2211679 | 0.5338711 | 0.4830655 | 5 | VAT1/SPG7/FIS1/DNM1L/PRKN       |
| Biological Process | GO:0010996 | response to auditory stimulus                          | 5/2279 | 27/18866 | 0.2211679 | 0.5338711 | 0.4830655 | 5 | NRXN1/HTT/NRXN2/SLC1A3/XPA      |
| Biological Process | GO:0015949 | nucleobase-containing small molecule interconversion   | 5/2279 | 27/18866 | 0.2211679 | 0.5338711 | 0.4830655 | 5 | RRM2B/GUK1/AK2/AK5/DCTD         |
| Biological Process | GO:0018126 | protein hydroxylation                                  | 5/2279 | 27/18866 | 0.2211679 | 0.5338711 | 0.4830655 | 5 | P4HB/P4HA2/ASPH/P3H3/P3H1       |
| Biological Process | GO:0032201 | telomere maintenance via semi-conservative replication | 5/2279 | 27/18866 | 0.2211679 | 0.5338711 | 0.4830655 | 5 | POLE/RTEL1/POLA2/POLD3/POLE4    |
| Biological Process | GO:0032438 | melanosome organization                                | 5/2279 | 27/18866 | 0.2211679 | 0.5338711 | 0.4830655 | 5 | LYST/KIF13A/ZEB2/AP3D1/DTNBP1   |
| Biological Process | GO:0034389 | lipid droplet organization                             | 5/2279 | 27/18866 | 0.2211679 | 0.5338711 | 0.4830655 | 5 | PNPLA2/TMEM159/CDS2/BSCL2/SPART |
| Biological Process | GO:0036037 | CD8-positive, alpha-beta T cell activation             | 5/2279 | 27/18866 | 0.2211679 | 0.5338711 | 0.4830655 | 5 | RUNX1/ZBTB7B/BCL2/RUNX3/VSIR    |

|                    |            |                                                                              |        |          |           |           |           |   |                                             |
|--------------------|------------|------------------------------------------------------------------------------|--------|----------|-----------|-----------|-----------|---|---------------------------------------------|
| Biological Process | GO:0048668 | collateral sprouting                                                         | 5/2279 | 27/18866 | 0.2211679 | 0.5338711 | 0.4830655 | 5 | ZEB2/APP/IFRD1/SEMA4D/SPART                 |
| Biological Process | GO:0070199 | establishment of protein localization to chromosome                          | 5/2279 | 27/18866 | 0.2211679 | 0.5338711 | 0.4830655 | 5 | SPIDR/BRCA2/PIH1D1/CCT6A/MACROH2A2          |
| Biological Process | GO:0072337 | modified amino acid transport                                                | 5/2279 | 27/18866 | 0.2211679 | 0.5338711 | 0.4830655 | 5 | ABCC1/FOLR3/SLC19A1/SLC22A5/PDZK1           |
| Biological Process | GO:0072539 | T-helper 17 cell differentiation                                             | 5/2279 | 27/18866 | 0.2211679 | 0.5338711 | 0.4830655 | 5 | NLRP3/LOXL3/SMAD7/LY9/ZBTB7B                |
| Biological Process | GO:1900078 | positive regulation of cellular response to insulin stimulus                 | 5/2279 | 27/18866 | 0.2211679 | 0.5338711 | 0.4830655 | 5 | PRKCZ/SORL1/GNAI2/ZBTB7B/MYO1C              |
| Biological Process | GO:1902175 | regulation of oxidative stress-induced intrinsic apoptotic signaling pathway | 5/2279 | 27/18866 | 0.2211679 | 0.5338711 | 0.4830655 | 5 | P4HB/NOL3/NFE2L2/BAG5/PRKN                  |
| Biological Process | GO:0006658 | phosphatidylserine metabolic process                                         | 6/2279 | 34/18866 | 0.2219404 | 0.5338711 | 0.4830655 | 6 | OSBPL5/ABHD16A/ABHD16B/OSBPL10/PLA1A/PTDSS2 |
| Biological Process | GO:0007202 | activation of phospholipase C activity                                       | 6/2279 | 34/18866 | 0.2219404 | 0.5338711 | 0.4830655 | 6 | P2RY6/PHB/LPAR2/S1PR4/PLCG1/NTF4            |
| Biological Process | GO:0008156 | negative regulation of DNA replication                                       | 6/2279 | 34/18866 | 0.2219404 | 0.5338711 | 0.4830655 | 6 | BLM/BRCA2/HUS1/SMARCA1/CHEK2/FBH1           |

|                    |            |                                                    |         |           |           |           |           |    |                                                                                                                 |
|--------------------|------------|----------------------------------------------------|---------|-----------|-----------|-----------|-----------|----|-----------------------------------------------------------------------------------------------------------------|
| Biological Process | GO:0008608 | attachment of spindle microtubules to kinetochore  | 6/2279  | 34/18866  | 0.2219404 | 0.5338711 | 0.4830655 | 6  | MAD1L1/CHAMP1/MIS12/RB1/SPAG5/ABRAXAS1                                                                          |
| Biological Process | GO:0035633 | maintenance of blood-brain barrier                 | 6/2279  | 34/18866  | 0.2219404 | 0.5338711 | 0.4830655 | 6  | MFSD2A/TJP2/ANGPT1/MBP/JAM3/ACTG1                                                                               |
| Biological Process | GO:0048536 | spleen development                                 | 6/2279  | 34/18866  | 0.2219404 | 0.5338711 | 0.4830655 | 6  | RIPK3/BCL2/EPB42/BCL3/FADD/PCID2                                                                                |
| Biological Process | GO:0048854 | brain morphogenesis                                | 6/2279  | 34/18866  | 0.2219404 | 0.5338711 | 0.4830655 | 6  | PAX2/NF1/ZNF335/SHANK2/FBXW11/SLIT1                                                                             |
| Biological Process | GO:0060236 | regulation of mitotic spindle organization         | 6/2279  | 34/18866  | 0.2219404 | 0.5338711 | 0.4830655 | 6  | DCTN1/RAE1/RCC1/DYNC1H1/TACC3/NUMA1                                                                             |
| Biological Process | GO:0098901 | regulation of cardiac muscle cell action potential | 6/2279  | 34/18866  | 0.2219404 | 0.5338711 | 0.4830655 | 6  | CACNA1C/GJA5/JUP/BIN1/NOS1AP/ANK2                                                                               |
| Biological Process | GO:0060419 | heart growth                                       | 17/2279 | 115/18866 | 0.2222343 | 0.5338711 | 0.4830655 | 17 | RXRA/CTDP1/AKAP13/MIR199A1/VGLL4/CCM2L/TGFBR2/RIPK1/RBPJ/MIR24-2/MIR23A/FGFR1/ACACB/MEIS1/MIR199A2/NOTCH1/MEF2C |
| Biological Process | GO:0010507 | negative regulation of autophagy                   | 13/2279 | 85/18866  | 0.2225281 | 0.5338711 | 0.4830655 | 13 | FOXK1/IL10/BMF/MIR199A1/USP36/FEZ2/CLEC16A/TBC1D14/NPC1/BCL2/MIR199A2/TSC2/EIF4G1                               |
| Biological Process | GO:0072384 | organelle transport along microtubule              | 13/2279 | 85/18866  | 0.2225281 | 0.5338711 | 0.4830655 | 13 | PRKCZ/NDE1/KIF13A/DYNC1H1/BICD2/CNIH2/HTT/KIF1B/KIFAP3/AP3D1/FBXW11/NDEL1/DTNBP1                                |



|                    |            |                                                                                   |         |           |           |           |           |    |                                                                                                                                                                                                                                                                                                             |
|--------------------|------------|-----------------------------------------------------------------------------------|---------|-----------|-----------|-----------|-----------|----|-------------------------------------------------------------------------------------------------------------------------------------------------------------------------------------------------------------------------------------------------------------------------------------------------------------|
| Biological Process | GO:0072527 | pyrimidine-containing compound metabolic process                                  | 13/2279 | 85/18866  | 0.2225281 | 0.5338711 | 0.4830655 | 13 | CDA/DPYS/TK2/UNG/UCK2/NTHL1/UPB1/TET2/AK5/DCTD/DHODH/TK1/ACP3                                                                                                                                                                                                                                               |
| Biological Process | GO:0046364 | monosaccharide biosynthetic process                                               | 15/2279 | 100/18866 | 0.2229927 | 0.5338711 | 0.4830655 | 15 | MAEA/ENO1/C1QTNF3/PGP/CHST15/PGAM1/PC/DGKQ/ENO3/PER2/PCK2/FOXO1/SOGA1/SLC25A1/SDHAF3                                                                                                                                                                                                                        |
| Biological Process | GO:0036293 | response to decreased oxygen levels                                               | 50/2279 | 371/18866 | 0.223005  | 0.5338711 | 0.4830655 | 50 | P4HB/ENO1/PLAU/ITPR2/MIR140/TM9SF4/CREB1/MYB/NDRG1/SMAD3/SLC8A1/HIPK2/CBFA2T3/ITPR1/SLC11A2/TGFBR2/THBS1/RBPJ/ACTN4/LIMD1/AQP1/NF1/HK2/ALAS1/AGTRAP/PSMF1/CREBBP/NOL3/CAT/ETS1/NFE2L2/FIS1/PKM/BCL2/PSMB7/NOTCH1/AQP3/DNM1L/EPAS1/PRKCE/NPPC/SLC2A1/ANKRD1/SLC29A1/BACH1/HSD11B2/ERCC2/PSMD13/MB/P<br>RCAA1 |
| Biological Process | GO:0072329 | monocarboxylic acid catabolic process                                             | 20/2279 | 138/18866 | 0.2245852 | 0.5338711 | 0.4830655 | 20 | PLA2G15/MFSD2A/ABHD16A/AMACR/ACOXL/AKR1D1/FAH/CYP4F3/ACADM/AGXT/ACACB/ACOX2/HOGA1/PCK2/ACAT1/ADTRP/CPT1A/LPIN1/LYPLA2/ACADVL                                                                                                                                                                                |
| Biological Process | GO:0010830 | regulation of myotube differentiation                                             | 10/2279 | 63/18866  | 0.2251328 | 0.5338711 | 0.4830655 | 10 | HDAC4/EHD1/MAML1/NFATC2/ANKRD2/BCL2/NOTCH1/FLOT1/SCGB3A1/CEACAM5                                                                                                                                                                                                                                            |
| Biological Process | GO:0055008 | cardiac muscle tissue morphogenesis                                               | 10/2279 | 63/18866  | 0.2251328 | 0.5338711 | 0.4830655 | 10 | ZFPM1/RXRA/TTN/CCM2L/RBPJ/SMAD7/TGFB1/ENG/NOTCH1/ANKRD1                                                                                                                                                                                                                                                     |
| Biological Process | GO:0070059 | intrinsic apoptotic signaling pathway in response to endoplasmic reticulum stress | 10/2279 | 63/18866  | 0.2251328 | 0.5338711 | 0.4830655 | 10 | ERN1/TRAF2/NCK2/ITPR1/ATP2A3/BCL2/CEBPB/BCL2L1/GRINA/PRKN                                                                                                                                                                                                                                                   |
| Biological Process | GO:0000070 | mitotic sister chromatid segregation                                              | 23/2279 | 161/18866 | 0.2251591 | 0.5338711 | 0.4830655 | 23 | MAD1L1/TTN/TNKS/NSMCE2/CHAMP1/CUL3/CDC16/MIS12/DCTN2/TACC3/NUMA1/PPP2R1A/MSTO1/NEK6/RB1/RAD21L1/CDCA5/DIS3L2/ANAPC7/SPAG5/HECW2/PCID2/SLF1                                                                                                                                                                  |
| Biological Process | GO:0000105 | histidine biosynthetic process                                                    | 1/2279  | 2/18866   | 0.2270118 | 0.5338711 | 0.4830655 | 1  | MTHFD1                                                                                                                                                                                                                                                                                                      |

|                    |            |                                                                                  |        |         |           |           |           |   |         |
|--------------------|------------|----------------------------------------------------------------------------------|--------|---------|-----------|-----------|-----------|---|---------|
| Biological Process | GO:0000301 | retrograde transport, vesicle recycling within Golgi                             | 1/2279 | 2/18866 | 0.2270118 | 0.5338711 | 0.4830655 | 1 | CUX1    |
| Biological Process | GO:0000390 | spliceosomal complex disassembly                                                 | 1/2279 | 2/18866 | 0.2270118 | 0.5338711 | 0.4830655 | 1 | TFIP11  |
| Biological Process | GO:0000973 | posttranscriptional tethering of RNA polymerase II gene DNA at nuclear periphery | 1/2279 | 2/18866 | 0.2270118 | 0.5338711 | 0.4830655 | 1 | PCID2   |
| Biological Process | GO:0001300 | chronological cell aging                                                         | 1/2279 | 2/18866 | 0.2270118 | 0.5338711 | 0.4830655 | 1 | ENG     |
| Biological Process | GO:0001507 | acetylcholine catabolic process in synaptic cleft                                | 1/2279 | 2/18866 | 0.2270118 | 0.5338711 | 0.4830655 | 1 | COLQ    |
| Biological Process | GO:0002017 | regulation of blood volume by renal aldosterone                                  | 1/2279 | 2/18866 | 0.2270118 | 0.5338711 | 0.4830655 | 1 | HSD11B2 |
| Biological Process | GO:0002032 | desensitization of G protein-coupled receptor signaling pathway by arrestin      | 1/2279 | 2/18866 | 0.2270118 | 0.5338711 | 0.4830655 | 1 | ARRB2   |
| Biological Process | GO:0002121 | inter-male aggressive behavior                                                   | 1/2279 | 2/18866 | 0.2270118 | 0.5338711 | 0.4830655 | 1 | KIRREL3 |
| Biological Process | GO:0002268 | follicular dendritic cell differentiation                                        | 1/2279 | 2/18866 | 0.2270118 | 0.5338711 | 0.4830655 | 1 | BCL3    |

|                    |            |                                                                  |        |         |           |           |           |   |       |
|--------------------|------------|------------------------------------------------------------------|--------|---------|-----------|-----------|-----------|---|-------|
| Biological Process | GO:0002280 | monocyte activation involved in immune response                  | 1/2279 | 2/18866 | 0.2270118 | 0.5338711 | 0.4830655 | 1 | DYSF  |
| Biological Process | GO:0002304 | gamma-delta intraepithelial T cell differentiation               | 1/2279 | 2/18866 | 0.2270118 | 0.5338711 | 0.4830655 | 1 | CCR9  |
| Biological Process | GO:0002305 | CD8-positive, gamma-delta intraepithelial T cell differentiation | 1/2279 | 2/18866 | 0.2270118 | 0.5338711 | 0.4830655 | 1 | CCR9  |
| Biological Process | GO:0002337 | B-1a B cell differentiation                                      | 1/2279 | 2/18866 | 0.2270118 | 0.5338711 | 0.4830655 | 1 | CMTM7 |
| Biological Process | GO:0002384 | hepatic immune response                                          | 1/2279 | 2/18866 | 0.2270118 | 0.5338711 | 0.4830655 | 1 | IL6R  |
| Biological Process | GO:0002397 | MHC class I protein complex assembly                             | 1/2279 | 2/18866 | 0.2270118 | 0.5338711 | 0.4830655 | 1 | CALR  |
| Biological Process | GO:0002502 | peptide antigen assembly with MHC class I protein complex        | 1/2279 | 2/18866 | 0.2270118 | 0.5338711 | 0.4830655 | 1 | CALR  |
| Biological Process | GO:0002522 | leukocyte migration involved in immune response                  | 1/2279 | 2/18866 | 0.2270118 | 0.5338711 | 0.4830655 | 1 | FUT7  |
| Biological Process | GO:0002542 | Factor XII activation                                            | 1/2279 | 2/18866 | 0.2270118 | 0.5338711 | 0.4830655 | 1 | F12   |

|                    |            |                                                                            |        |         |           |           |           |   |        |
|--------------------|------------|----------------------------------------------------------------------------|--------|---------|-----------|-----------|-----------|---|--------|
| Biological Process | GO:0002543 | activation of blood coagulation via clotting cascade                       | 1/2279 | 2/18866 | 0.2270118 | 0.5338711 | 0.4830655 | 1 | ANO6   |
| Biological Process | GO:0002661 | regulation of B cell tolerance induction                                   | 1/2279 | 2/18866 | 0.2270118 | 0.5338711 | 0.4830655 | 1 | TGFBR2 |
| Biological Process | GO:0002663 | positive regulation of B cell tolerance induction                          | 1/2279 | 2/18866 | 0.2270118 | 0.5338711 | 0.4830655 | 1 | TGFBR2 |
| Biological Process | GO:0002752 | cell surface pattern recognition receptor signaling pathway                | 1/2279 | 2/18866 | 0.2270118 | 0.5338711 | 0.4830655 | 1 | FCN1   |
| Biological Process | GO:0002876 | positive regulation of chronic inflammatory response to antigenic stimulus | 1/2279 | 2/18866 | 0.2270118 | 0.5338711 | 0.4830655 | 1 | TNF    |
| Biological Process | GO:0003127 | detection of nodal flow                                                    | 1/2279 | 2/18866 | 0.2270118 | 0.5338711 | 0.4830655 | 1 | PKD1L1 |
| Biological Process | GO:0003169 | coronary vein morphogenesis                                                | 1/2279 | 2/18866 | 0.2270118 | 0.5338711 | 0.4830655 | 1 | NOTCH1 |
| Biological Process | GO:0003193 | pulmonary valve formation                                                  | 1/2279 | 2/18866 | 0.2270118 | 0.5338711 | 0.4830655 | 1 | GJA5   |
| Biological Process | GO:0003195 | tricuspid valve formation                                                  | 1/2279 | 2/18866 | 0.2270118 | 0.5338711 | 0.4830655 | 1 | ZFPM1  |

|                    |            |                                                                                 |        |         |           |           |           |   |        |
|--------------------|------------|---------------------------------------------------------------------------------|--------|---------|-----------|-----------|-----------|---|--------|
| Biological Process | GO:0003213 | cardiac right atrium morphogenesis                                              | 1/2279 | 2/18866 | 0.2270118 | 0.5338711 | 0.4830655 | 1 | NOTCH1 |
| Biological Process | GO:0003252 | negative regulation of cell proliferation involved in heart valve morphogenesis | 1/2279 | 2/18866 | 0.2270118 | 0.5338711 | 0.4830655 | 1 | NOTCH1 |
| Biological Process | GO:0003290 | atrial septum secundum morphogenesis                                            | 1/2279 | 2/18866 | 0.2270118 | 0.5338711 | 0.4830655 | 1 | NSD2   |
| Biological Process | GO:0003292 | cardiac septum cell differentiation                                             | 1/2279 | 2/18866 | 0.2270118 | 0.5338711 | 0.4830655 | 1 | MAML1  |
| Biological Process | GO:0003420 | regulation of growth plate cartilage chondrocyte proliferation                  | 1/2279 | 2/18866 | 0.2270118 | 0.5338711 | 0.4830655 | 1 | POR    |
| Biological Process | GO:0006050 | mannosamine metabolic process                                                   | 1/2279 | 2/18866 | 0.2270118 | 0.5338711 | 0.4830655 | 1 | NAGK   |
| Biological Process | GO:0006051 | N-acetylmannosamine metabolic process                                           | 1/2279 | 2/18866 | 0.2270118 | 0.5338711 | 0.4830655 | 1 | NAGK   |
| Biological Process | GO:0006196 | AMP catabolic process                                                           | 1/2279 | 2/18866 | 0.2270118 | 0.5338711 | 0.4830655 | 1 | AMPD3  |
| Biological Process | GO:0006212 | uracil catabolic process                                                        | 1/2279 | 2/18866 | 0.2270118 | 0.5338711 | 0.4830655 | 1 | DPYS   |

|                    |            |                                           |        |         |           |           |           |   |       |
|--------------------|------------|-------------------------------------------|--------|---------|-----------|-----------|-----------|---|-------|
| Biological Process | GO:0006423 | cysteinyl-tRNA aminoacylation             | 1/2279 | 2/18866 | 0.2270118 | 0.5338711 | 0.4830655 | 1 | CARS2 |
| Biological Process | GO:0006424 | glutamyl-tRNA aminoacylation              | 1/2279 | 2/18866 | 0.2270118 | 0.5338711 | 0.4830655 | 1 | EARS2 |
| Biological Process | GO:0006431 | methionyl-tRNA aminoacylation             | 1/2279 | 2/18866 | 0.2270118 | 0.5338711 | 0.4830655 | 1 | MARS1 |
| Biological Process | GO:0006437 | tyrosyl-tRNA aminoacylation               | 1/2279 | 2/18866 | 0.2270118 | 0.5338711 | 0.4830655 | 1 | YARS1 |
| Biological Process | GO:0006478 | peptidyl-tyrosine sulfation               | 1/2279 | 2/18866 | 0.2270118 | 0.5338711 | 0.4830655 | 1 | TPST1 |
| Biological Process | GO:0006480 | N-terminal protein amino acid methylation | 1/2279 | 2/18866 | 0.2270118 | 0.5338711 | 0.4830655 | 1 | NTMT1 |
| Biological Process | GO:0006535 | cysteine biosynthetic process from serine | 1/2279 | 2/18866 | 0.2270118 | 0.5338711 | 0.4830655 | 1 | CBS   |
| Biological Process | GO:0006550 | isoleucine catabolic process              | 1/2279 | 2/18866 | 0.2270118 | 0.5338711 | 0.4830655 | 1 | ACAT1 |
| Biological Process | GO:0006581 | acetylcholine catabolic process           | 1/2279 | 2/18866 | 0.2270118 | 0.5338711 | 0.4830655 | 1 | COLQ  |

|                    |            |                                                                  |        |         |           |           |           |   |         |
|--------------------|------------|------------------------------------------------------------------|--------|---------|-----------|-----------|-----------|---|---------|
| Biological Process | GO:0006876 | cellular cadmium ion homeostasis                                 | 1/2279 | 2/18866 | 0.2270118 | 0.5338711 | 0.4830655 | 1 | SLC11A1 |
| Biological Process | GO:0007402 | ganglion mother cell fate determination                          | 1/2279 | 2/18866 | 0.2270118 | 0.5338711 | 0.4830655 | 1 | NTF4    |
| Biological Process | GO:0007518 | myoblast fate determination                                      | 1/2279 | 2/18866 | 0.2270118 | 0.5338711 | 0.4830655 | 1 | IFRD1   |
| Biological Process | GO:0007521 | muscle cell fate determination                                   | 1/2279 | 2/18866 | 0.2270118 | 0.5338711 | 0.4830655 | 1 | MEF2C   |
| Biological Process | GO:0007529 | establishment of synaptic specificity at neuromuscular junction  | 1/2279 | 2/18866 | 0.2270118 | 0.5338711 | 0.4830655 | 1 | F2R     |
| Biological Process | GO:0009115 | xanthine catabolic process                                       | 1/2279 | 2/18866 | 0.2270118 | 0.5338711 | 0.4830655 | 1 | AOX1    |
| Biological Process | GO:0009407 | toxin catabolic process                                          | 1/2279 | 2/18866 | 0.2270118 | 0.5338711 | 0.4830655 | 1 | NFE2L2  |
| Biological Process | GO:0010142 | farnesyl diphosphate biosynthetic process, mevalonate pathway    | 1/2279 | 2/18866 | 0.2270118 | 0.5338711 | 0.4830655 | 1 | HMGCS1  |
| Biological Process | GO:0010512 | negative regulation of phosphatidylinositol biosynthetic process | 1/2279 | 2/18866 | 0.2270118 | 0.5338711 | 0.4830655 | 1 | PDGFB   |

|                    |            |                                                                                                  |        |         |           |           |           |   |         |
|--------------------|------------|--------------------------------------------------------------------------------------------------|--------|---------|-----------|-----------|-----------|---|---------|
| Biological Process | GO:0010609 | mRNA localization resulting in posttranscriptional regulation of gene expression                 | 1/2279 | 2/18866 | 0.2270118 | 0.5338711 | 0.4830655 | 1 | ZNF385A |
| Biological Process | GO:0010645 | regulation of cell communication by chemical coupling                                            | 1/2279 | 2/18866 | 0.2270118 | 0.5338711 | 0.4830655 | 1 | GJA5    |
| Biological Process | GO:0010652 | positive regulation of cell communication by chemical coupling                                   | 1/2279 | 2/18866 | 0.2270118 | 0.5338711 | 0.4830655 | 1 | GJA5    |
| Biological Process | GO:0010731 | protein glutathionylation                                                                        | 1/2279 | 2/18866 | 0.2270118 | 0.5338711 | 0.4830655 | 1 | FXYD1   |
| Biological Process | GO:0010732 | regulation of protein glutathionylation                                                          | 1/2279 | 2/18866 | 0.2270118 | 0.5338711 | 0.4830655 | 1 | FXYD1   |
| Biological Process | GO:0010734 | negative regulation of protein glutathionylation                                                 | 1/2279 | 2/18866 | 0.2270118 | 0.5338711 | 0.4830655 | 1 | FXYD1   |
| Biological Process | GO:0010767 | regulation of transcription from RNA polymerase II promoter in response to UV-induced DNA damage | 1/2279 | 2/18866 | 0.2270118 | 0.5338711 | 0.4830655 | 1 | NEDD4   |
| Biological Process | GO:0010813 | neuropeptide catabolic process                                                                   | 1/2279 | 2/18866 | 0.2270118 | 0.5338711 | 0.4830655 | 1 | CTSH    |
| Biological Process | GO:0010848 | regulation of chromatin disassembly                                                              | 1/2279 | 2/18866 | 0.2270118 | 0.5338711 | 0.4830655 | 1 | PADI2   |



|                    |            |                                           |        |         |           |           |           |   |         |
|--------------------|------------|-------------------------------------------|--------|---------|-----------|-----------|-----------|---|---------|
| Biological Process | GO:0015680 | protein maturation by copper ion transfer | 1/2279 | 2/18866 | 0.2270118 | 0.5338711 | 0.4830655 | 1 | ATP7B   |
| Biological Process | GO:0015786 | UDP-glucose transmembrane transport       | 1/2279 | 2/18866 | 0.2270118 | 0.5338711 | 0.4830655 | 1 | SLC35C2 |
| Biological Process | GO:0015817 | histidine transport                       | 1/2279 | 2/18866 | 0.2270118 | 0.5338711 | 0.4830655 | 1 | SLC15A4 |
| Biological Process | GO:0015819 | lysine transport                          | 1/2279 | 2/18866 | 0.2270118 | 0.5338711 | 0.4830655 | 1 | SLC7A1  |
| Biological Process | GO:0015823 | phenylalanine transport                   | 1/2279 | 2/18866 | 0.2270118 | 0.5338711 | 0.4830655 | 1 | SLC7A5  |
| Biological Process | GO:0015882 | L-ascorbic acid transmembrane transport   | 1/2279 | 2/18866 | 0.2270118 | 0.5338711 | 0.4830655 | 1 | SLC23A1 |
| Biological Process | GO:0015916 | fatty-acyl-CoA transport                  | 1/2279 | 2/18866 | 0.2270118 | 0.5338711 | 0.4830655 | 1 | SLC33A1 |
| Biological Process | GO:0016036 | cellular response to phosphate starvation | 1/2279 | 2/18866 | 0.2270118 | 0.5338711 | 0.4830655 | 1 | COMT    |
| Biological Process | GO:0016182 | synaptic vesicle budding from endosome    | 1/2279 | 2/18866 | 0.2270118 | 0.5338711 | 0.4830655 | 1 | AP3D1   |

|                    |            |                                                               |        |         |           |           |           |   |        |
|--------------------|------------|---------------------------------------------------------------|--------|---------|-----------|-----------|-----------|---|--------|
| Biological Process | GO:0016320 | endoplasmic reticulum membrane fusion                         | 1/2279 | 2/18866 | 0.2270118 | 0.5338711 | 0.4830655 | 1 | VCPIP1 |
| Biological Process | GO:0016998 | cell wall macromolecule catabolic process                     | 1/2279 | 2/18866 | 0.2270118 | 0.5338711 | 0.4830655 | 1 | LYG2   |
| Biological Process | GO:0016999 | antibiotic metabolic process                                  | 1/2279 | 2/18866 | 0.2270118 | 0.5338711 | 0.4830655 | 1 | ABCC2  |
| Biological Process | GO:0019072 | viral genome packaging                                        | 1/2279 | 2/18866 | 0.2270118 | 0.5338711 | 0.4830655 | 1 | PC     |
| Biological Process | GO:0019074 | viral RNA genome packaging                                    | 1/2279 | 2/18866 | 0.2270118 | 0.5338711 | 0.4830655 | 1 | PC     |
| Biological Process | GO:0019075 | virus maturation                                              | 1/2279 | 2/18866 | 0.2270118 | 0.5338711 | 0.4830655 | 1 | MVB12A |
| Biological Process | GO:0019265 | glycine biosynthetic process, by transamination of glyoxylate | 1/2279 | 2/18866 | 0.2270118 | 0.5338711 | 0.4830655 | 1 | AGXT   |
| Biological Process | GO:0019483 | beta-alanine biosynthetic process                             | 1/2279 | 2/18866 | 0.2270118 | 0.5338711 | 0.4830655 | 1 | UPB1   |
| Biological Process | GO:0019543 | propionate catabolic process                                  | 1/2279 | 2/18866 | 0.2270118 | 0.5338711 | 0.4830655 | 1 | PCK2   |

|                    |            |                                                        |        |         |           |           |           |   |        |
|--------------------|------------|--------------------------------------------------------|--------|---------|-----------|-----------|-----------|---|--------|
| Biological Process | GO:0019858 | cytosine metabolic process                             | 1/2279 | 2/18866 | 0.2270118 | 0.5338711 | 0.4830655 | 1 | CDA    |
| Biological Process | GO:0021622 | oculomotor nerve morphogenesis                         | 1/2279 | 2/18866 | 0.2270118 | 0.5338711 | 0.4830655 | 1 | PHOX2A |
| Biological Process | GO:0021623 | oculomotor nerve formation                             | 1/2279 | 2/18866 | 0.2270118 | 0.5338711 | 0.4830655 | 1 | PHOX2A |
| Biological Process | GO:0021633 | optic nerve structural organization                    | 1/2279 | 2/18866 | 0.2270118 | 0.5338711 | 0.4830655 | 1 | PAX2   |
| Biological Process | GO:0021649 | vestibulocochlear nerve structural organization        | 1/2279 | 2/18866 | 0.2270118 | 0.5338711 | 0.4830655 | 1 | NRP2   |
| Biological Process | GO:0021679 | cerebellar molecular layer development                 | 1/2279 | 2/18866 | 0.2270118 | 0.5338711 | 0.4830655 | 1 | DLL1   |
| Biological Process | GO:0021687 | cerebellar molecular layer morphogenesis               | 1/2279 | 2/18866 | 0.2270118 | 0.5338711 | 0.4830655 | 1 | DLL1   |
| Biological Process | GO:0021693 | cerebellar Purkinje cell layer structural organization | 1/2279 | 2/18866 | 0.2270118 | 0.5338711 | 0.4830655 | 1 | DLL1   |
| Biological Process | GO:0021698 | cerebellar cortex structural organization              | 1/2279 | 2/18866 | 0.2270118 | 0.5338711 | 0.4830655 | 1 | DLL1   |

|                    |            |                                                           |        |         |           |           |           |   |         |
|--------------------|------------|-----------------------------------------------------------|--------|---------|-----------|-----------|-----------|---|---------|
| Biological Process | GO:0021730 | trigeminal sensory nucleus development                    | 1/2279 | 2/18866 | 0.2270118 | 0.5338711 | 0.4830655 | 1 | KIRREL3 |
| Biological Process | GO:0021740 | principal sensory nucleus of trigeminal nerve development | 1/2279 | 2/18866 | 0.2270118 | 0.5338711 | 0.4830655 | 1 | KIRREL3 |
| Biological Process | GO:0021767 | mammillary body development                               | 1/2279 | 2/18866 | 0.2270118 | 0.5338711 | 0.4830655 | 1 | ZEB2    |
| Biological Process | GO:0021896 | forebrain astrocyte differentiation                       | 1/2279 | 2/18866 | 0.2270118 | 0.5338711 | 0.4830655 | 1 | NF1     |
| Biological Process | GO:0021897 | forebrain astrocyte development                           | 1/2279 | 2/18866 | 0.2270118 | 0.5338711 | 0.4830655 | 1 | NF1     |
| Biological Process | GO:0030389 | fructosamine metabolic process                            | 1/2279 | 2/18866 | 0.2270118 | 0.5338711 | 0.4830655 | 1 | FN3K    |
| Biological Process | GO:0030573 | bile acid catabolic process                               | 1/2279 | 2/18866 | 0.2270118 | 0.5338711 | 0.4830655 | 1 | AKR1D1  |
| Biological Process | GO:0030974 | thiamine pyrophosphate transmembrane transport            | 1/2279 | 2/18866 | 0.2270118 | 0.5338711 | 0.4830655 | 1 | SLC44A4 |
| Biological Process | GO:0032459 | regulation of protein oligomerization                     | 1/2279 | 2/18866 | 0.2270118 | 0.5338711 | 0.4830655 | 1 | ZDHHC1  |

|                    |            |                                                                    |        |         |           |           |           |   |         |
|--------------------|------------|--------------------------------------------------------------------|--------|---------|-----------|-----------|-----------|---|---------|
| Biological Process | GO:0032499 | detection of peptidoglycan                                         | 1/2279 | 2/18866 | 0.2270118 | 0.5338711 | 0.4830655 | 1 | NOD2    |
| Biological Process | GO:0032632 | interleukin-3 production                                           | 1/2279 | 2/18866 | 0.2270118 | 0.5338711 | 0.4830655 | 1 | SLC11A1 |
| Biological Process | GO:0032699 | negative regulation of interleukin-16 production                   | 1/2279 | 2/18866 | 0.2270118 | 0.5338711 | 0.4830655 | 1 | MIR145  |
| Biological Process | GO:0032796 | uropod organization                                                | 1/2279 | 2/18866 | 0.2270118 | 0.5338711 | 0.4830655 | 1 | MYH9    |
| Biological Process | GO:0032877 | positive regulation of DNA endoreduplication                       | 1/2279 | 2/18866 | 0.2270118 | 0.5338711 | 0.4830655 | 1 | E2F7    |
| Biological Process | GO:0032902 | nerve growth factor production                                     | 1/2279 | 2/18866 | 0.2270118 | 0.5338711 | 0.4830655 | 1 | PCSK6   |
| Biological Process | GO:0032912 | negative regulation of transforming growth factor beta2 production | 1/2279 | 2/18866 | 0.2270118 | 0.5338711 | 0.4830655 | 1 | CDH3    |
| Biological Process | GO:0032915 | positive regulation of transforming growth factor beta2 production | 1/2279 | 2/18866 | 0.2270118 | 0.5338711 | 0.4830655 | 1 | WNT11   |
| Biological Process | GO:0032917 | polyamine acetylation                                              | 1/2279 | 2/18866 | 0.2270118 | 0.5338711 | 0.4830655 | 1 | SAT2    |

|                    |            |                                                     |        |         |           |           |           |   |         |
|--------------------|------------|-----------------------------------------------------|--------|---------|-----------|-----------|-----------|---|---------|
| Biological Process | GO:0032918 | spermidine acetylation                              | 1/2279 | 2/18866 | 0.2270118 | 0.5338711 | 0.4830655 | 1 | SAT2    |
| Biological Process | GO:0033030 | negative regulation of neutrophil apoptotic process | 1/2279 | 2/18866 | 0.2270118 | 0.5338711 | 0.4830655 | 1 | ITPKB   |
| Biological Process | GO:0033037 | polysaccharide localization                         | 1/2279 | 2/18866 | 0.2270118 | 0.5338711 | 0.4830655 | 1 | CHST11  |
| Biological Process | GO:0033277 | abortive mitotic cell cycle                         | 1/2279 | 2/18866 | 0.2270118 | 0.5338711 | 0.4830655 | 1 | PTPN6   |
| Biological Process | GO:0033364 | mast cell secretory granule organization            | 1/2279 | 2/18866 | 0.2270118 | 0.5338711 | 0.4830655 | 1 | LYST    |
| Biological Process | GO:0033505 | floor plate morphogenesis                           | 1/2279 | 2/18866 | 0.2270118 | 0.5338711 | 0.4830655 | 1 | NODAL   |
| Biological Process | GO:0033566 | gamma-tubulin complex localization                  | 1/2279 | 2/18866 | 0.2270118 | 0.5338711 | 0.4830655 | 1 | CEP72   |
| Biological Process | GO:0034146 | toll-like receptor 5 signaling pathway              | 1/2279 | 2/18866 | 0.2270118 | 0.5338711 | 0.4830655 | 1 | TNFAIP3 |
| Biological Process | GO:0034342 | response to type III interferon                     | 1/2279 | 2/18866 | 0.2270118 | 0.5338711 | 0.4830655 | 1 | SHFL    |

|                    |            |                                                                                                  |        |         |           |           |           |   |        |
|--------------------|------------|--------------------------------------------------------------------------------------------------|--------|---------|-----------|-----------|-----------|---|--------|
| Biological Process | GO:0034418 | urate biosynthetic process                                                                       | 1/2279 | 2/18866 | 0.2270118 | 0.5338711 | 0.4830655 | 1 | PNP    |
| Biological Process | GO:0034477 | U6 snRNA 3'-end processing                                                                       | 1/2279 | 2/18866 | 0.2270118 | 0.5338711 | 0.4830655 | 1 | TUT1   |
| Biological Process | GO:0035279 | mRNA cleavage involved in gene silencing by miRNA                                                | 1/2279 | 2/18866 | 0.2270118 | 0.5338711 | 0.4830655 | 1 | AGO2   |
| Biological Process | GO:0035378 | carbon dioxide transmembrane transport                                                           | 1/2279 | 2/18866 | 0.2270118 | 0.5338711 | 0.4830655 | 1 | AQP1   |
| Biological Process | GO:0035552 | oxidative single-stranded DNA demethylation                                                      | 1/2279 | 2/18866 | 0.2270118 | 0.5338711 | 0.4830655 | 1 | FTO    |
| Biological Process | GO:0035566 | regulation of metanephros size                                                                   | 1/2279 | 2/18866 | 0.2270118 | 0.5338711 | 0.4830655 | 1 | PAX2   |
| Biological Process | GO:0035574 | histone H4-K20 demethylation                                                                     | 1/2279 | 2/18866 | 0.2270118 | 0.5338711 | 0.4830655 | 1 | KDM7A  |
| Biological Process | GO:0035600 | tRNA methylthiolation                                                                            | 1/2279 | 2/18866 | 0.2270118 | 0.5338711 | 0.4830655 | 1 | CDKAL1 |
| Biological Process | GO:0035607 | fibroblast growth factor receptor signaling pathway involved in orbitofrontal cortex development | 1/2279 | 2/18866 | 0.2270118 | 0.5338711 | 0.4830655 | 1 | FGFR1  |

|                    |            |                                  |        |         |           |           |           |   |          |
|--------------------|------------|----------------------------------|--------|---------|-----------|-----------|-----------|---|----------|
| Biological Process | GO:0035675 | neuromast hair cell development  | 1/2279 | 2/18866 | 0.2270118 | 0.5338711 | 0.4830655 | 1 | SLC44A4  |
| Biological Process | GO:0035700 | astrocyte chemotaxis             | 1/2279 | 2/18866 | 0.2270118 | 0.5338711 | 0.4830655 | 1 | CCR2     |
| Biological Process | GO:0035922 | foramen ovale closure            | 1/2279 | 2/18866 | 0.2270118 | 0.5338711 | 0.4830655 | 1 | GJA5     |
| Biological Process | GO:0035936 | testosterone secretion           | 1/2279 | 2/18866 | 0.2270118 | 0.5338711 | 0.4830655 | 1 | MYB      |
| Biological Process | GO:0036115 | fatty-acyl-CoA catabolic process | 1/2279 | 2/18866 | 0.2270118 | 0.5338711 | 0.4830655 | 1 | ACOT7    |
| Biological Process | GO:0036292 | DNA rewinding                    | 1/2279 | 2/18866 | 0.2270118 | 0.5338711 | 0.4830655 | 1 | SMARCAL1 |
| Biological Process | GO:0036309 | protein localization to M-band   | 1/2279 | 2/18866 | 0.2270118 | 0.5338711 | 0.4830655 | 1 | ANK2     |
| Biological Process | GO:0036345 | platelet maturation              | 1/2279 | 2/18866 | 0.2270118 | 0.5338711 | 0.4830655 | 1 | SLFN14   |
| Biological Process | GO:0036371 | protein localization to T-tubule | 1/2279 | 2/18866 | 0.2270118 | 0.5338711 | 0.4830655 | 1 | ANK2     |



|                    |            |                                                                                          |        |         |           |           |           |   |        |
|--------------------|------------|------------------------------------------------------------------------------------------|--------|---------|-----------|-----------|-----------|---|--------|
| Biological Process | GO:0036413 | histone H3-R26 citrullination                                                            | 1/2279 | 2/18866 | 0.2270118 | 0.5338711 | 0.4830655 | 1 | PADI2  |
| Biological Process | GO:0036483 | neuron intrinsic apoptotic signaling pathway in response to endoplasmic reticulum stress | 1/2279 | 2/18866 | 0.2270118 | 0.5338711 | 0.4830655 | 1 | PRKN   |
| Biological Process | GO:0036525 | protein deglycation                                                                      | 1/2279 | 2/18866 | 0.2270118 | 0.5338711 | 0.4830655 | 1 | FN3K   |
| Biological Process | GO:0038043 | interleukin-5-mediated signaling pathway                                                 | 1/2279 | 2/18866 | 0.2270118 | 0.5338711 | 0.4830655 | 1 | CSF2RB |
| Biological Process | GO:0038112 | interleukin-8-mediated signaling pathway                                                 | 1/2279 | 2/18866 | 0.2270118 | 0.5338711 | 0.4830655 | 1 | CXCR1  |
| Biological Process | GO:0038178 | complement component C5a signaling pathway                                               | 1/2279 | 2/18866 | 0.2270118 | 0.5338711 | 0.4830655 | 1 | C5AR2  |
| Biological Process | GO:0039003 | pronephric field specification                                                           | 1/2279 | 2/18866 | 0.2270118 | 0.5338711 | 0.4830655 | 1 | PAX2   |
| Biological Process | GO:0039017 | pattern specification involved in pronephros development                                 | 1/2279 | 2/18866 | 0.2270118 | 0.5338711 | 0.4830655 | 1 | PAX2   |
| Biological Process | GO:0040010 | positive regulation of growth rate                                                       | 1/2279 | 2/18866 | 0.2270118 | 0.5338711 | 0.4830655 | 1 | GHRL   |

|                    |            |                                                                        |        |         |           |           |           |   |        |
|--------------------|------------|------------------------------------------------------------------------|--------|---------|-----------|-----------|-----------|---|--------|
| Biological Process | GO:0042245 | RNA repair                                                             | 1/2279 | 2/18866 | 0.2270118 | 0.5338711 | 0.4830655 | 1 | FTO    |
| Biological Process | GO:0042264 | peptidyl-aspartic acid hydroxylation                                   | 1/2279 | 2/18866 | 0.2270118 | 0.5338711 | 0.4830655 | 1 | ASPH   |
| Biological Process | GO:0042322 | negative regulation of circadian sleep/wake cycle, REM sleep           | 1/2279 | 2/18866 | 0.2270118 | 0.5338711 | 0.4830655 | 1 | GHRL   |
| Biological Process | GO:0042365 | water-soluble vitamin catabolic process                                | 1/2279 | 2/18866 | 0.2270118 | 0.5338711 | 0.4830655 | 1 | MTHFS  |
| Biological Process | GO:0042710 | biofilm formation                                                      | 1/2279 | 2/18866 | 0.2270118 | 0.5338711 | 0.4830655 | 1 | LTF    |
| Biological Process | GO:0042823 | pyridoxal phosphate biosynthetic process                               | 1/2279 | 2/18866 | 0.2270118 | 0.5338711 | 0.4830655 | 1 | PDXK   |
| Biological Process | GO:0043007 | maintenance of rDNA                                                    | 1/2279 | 2/18866 | 0.2270118 | 0.5338711 | 0.4830655 | 1 | RMI2   |
| Biological Process | GO:0043375 | CD8-positive, alpha-beta T cell lineage commitment                     | 1/2279 | 2/18866 | 0.2270118 | 0.5338711 | 0.4830655 | 1 | BCL2   |
| Biological Process | GO:0043377 | negative regulation of CD8-positive, alpha-beta T cell differentiation | 1/2279 | 2/18866 | 0.2270118 | 0.5338711 | 0.4830655 | 1 | ZBTB7B |

|                    |            |                                                                                                         |        |         |           |           |           |   |        |
|--------------------|------------|---------------------------------------------------------------------------------------------------------|--------|---------|-----------|-----------|-----------|---|--------|
| Biological Process | GO:0043387 | mycotoxin catabolic process                                                                             | 1/2279 | 2/18866 | 0.2270118 | 0.5338711 | 0.4830655 | 1 | NFE2L2 |
| Biological Process | GO:0043974 | histone H3-K27 acetylation                                                                              | 1/2279 | 2/18866 | 0.2270118 | 0.5338711 | 0.4830655 | 1 | LIF    |
| Biological Process | GO:0044010 | single-species biofilm formation                                                                        | 1/2279 | 2/18866 | 0.2270118 | 0.5338711 | 0.4830655 | 1 | LTF    |
| Biological Process | GO:0044111 | development involved in symbiotic interaction                                                           | 1/2279 | 2/18866 | 0.2270118 | 0.5338711 | 0.4830655 | 1 | NEDD4  |
| Biological Process | GO:0044334 | canonical Wnt signaling pathway involved in positive regulation of epithelial to mesenchymal transition | 1/2279 | 2/18866 | 0.2270118 | 0.5338711 | 0.4830655 | 1 | TCF7L2 |
| Biological Process | GO:0044407 | single-species biofilm formation in or on host organism                                                 | 1/2279 | 2/18866 | 0.2270118 | 0.5338711 | 0.4830655 | 1 | LTF    |
| Biological Process | GO:0044501 | modulation of signal transduction in other organism                                                     | 1/2279 | 2/18866 | 0.2270118 | 0.5338711 | 0.4830655 | 1 | TNIP1  |
| Biological Process | GO:0044778 | meiotic DNA integrity checkpoint                                                                        | 1/2279 | 2/18866 | 0.2270118 | 0.5338711 | 0.4830655 | 1 | HUS1   |
| Biological Process | GO:0045004 | DNA replication proofreading                                                                            | 1/2279 | 2/18866 | 0.2270118 | 0.5338711 | 0.4830655 | 1 | POLE   |

|                    |            |                                                      |        |         |           |           |           |   |        |
|--------------------|------------|------------------------------------------------------|--------|---------|-----------|-----------|-----------|---|--------|
| Biological Process | GO:0045168 | cell-cell signaling involved in cell fate commitment | 1/2279 | 2/18866 | 0.2270118 | 0.5338711 | 0.4830655 | 1 | DLL1   |
| Biological Process | GO:0045210 | FasL biosynthetic process                            | 1/2279 | 2/18866 | 0.2270118 | 0.5338711 | 0.4830655 | 1 | PHLDA1 |
| Biological Process | GO:0045643 | regulation of eosinophil differentiation             | 1/2279 | 2/18866 | 0.2270118 | 0.5338711 | 0.4830655 | 1 | TRIB1  |
| Biological Process | GO:0045645 | positive regulation of eosinophil differentiation    | 1/2279 | 2/18866 | 0.2270118 | 0.5338711 | 0.4830655 | 1 | TRIB1  |
| Biological Process | GO:0045918 | negative regulation of cytolysis                     | 1/2279 | 2/18866 | 0.2270118 | 0.5338711 | 0.4830655 | 1 | TGFB1  |
| Biological Process | GO:0046223 | aflatoxin catabolic process                          | 1/2279 | 2/18866 | 0.2270118 | 0.5338711 | 0.4830655 | 1 | NFE2L2 |
| Biological Process | GO:0046327 | glycerol biosynthetic process from pyruvate          | 1/2279 | 2/18866 | 0.2270118 | 0.5338711 | 0.4830655 | 1 | PCK2   |
| Biological Process | GO:0046331 | lateral inhibition                                   | 1/2279 | 2/18866 | 0.2270118 | 0.5338711 | 0.4830655 | 1 | DLL1   |
| Biological Process | GO:0046356 | acetyl-CoA catabolic process                         | 1/2279 | 2/18866 | 0.2270118 | 0.5338711 | 0.4830655 | 1 | ACAT1  |

|                    |            |                                                    |        |         |           |           |           |   |          |
|--------------------|------------|----------------------------------------------------|--------|---------|-----------|-----------|-----------|---|----------|
| Biological Process | GO:0046511 | sphinganine biosynthetic process                   | 1/2279 | 2/18866 | 0.2270118 | 0.5338711 | 0.4830655 | 1 | SPTLC2   |
| Biological Process | GO:0046586 | regulation of calcium-dependent cell-cell adhesion | 1/2279 | 2/18866 | 0.2270118 | 0.5338711 | 0.4830655 | 1 | KIFAP3   |
| Biological Process | GO:0046618 | drug export                                        | 1/2279 | 2/18866 | 0.2270118 | 0.5338711 | 0.4830655 | 1 | ABCC2    |
| Biological Process | GO:0046724 | oxalic acid secretion                              | 1/2279 | 2/18866 | 0.2270118 | 0.5338711 | 0.4830655 | 1 | AGXT     |
| Biological Process | GO:0046878 | positive regulation of saliva secretion            | 1/2279 | 2/18866 | 0.2270118 | 0.5338711 | 0.4830655 | 1 | AQP1     |
| Biological Process | GO:0048250 | iron import into the mitochondrion                 | 1/2279 | 2/18866 | 0.2270118 | 0.5338711 | 0.4830655 | 1 | SLC25A37 |
| Biological Process | GO:0048320 | axial mesoderm formation                           | 1/2279 | 2/18866 | 0.2270118 | 0.5338711 | 0.4830655 | 1 | NODAL    |
| Biological Process | GO:0048372 | lateral mesodermal cell fate commitment            | 1/2279 | 2/18866 | 0.2270118 | 0.5338711 | 0.4830655 | 1 | FGFR1    |
| Biological Process | GO:0048377 | lateral mesodermal cell fate specification         | 1/2279 | 2/18866 | 0.2270118 | 0.5338711 | 0.4830655 | 1 | FGFR1    |

|                    |            |                                                                                                  |        |         |           |           |           |   |            |
|--------------------|------------|--------------------------------------------------------------------------------------------------|--------|---------|-----------|-----------|-----------|---|------------|
| Biological Process | GO:0048378 | regulation of lateral mesodermal cell fate specification                                         | 1/2279 | 2/18866 | 0.2270118 | 0.5338711 | 0.4830655 | 1 | FGFR1      |
| Biological Process | GO:0048817 | negative regulation of hair follicle maturation                                                  | 1/2279 | 2/18866 | 0.2270118 | 0.5338711 | 0.4830655 | 1 | CDH3       |
| Biological Process | GO:0048882 | lateral line development                                                                         | 1/2279 | 2/18866 | 0.2270118 | 0.5338711 | 0.4830655 | 1 | SLC44A4    |
| Biological Process | GO:0048884 | neuromast development                                                                            | 1/2279 | 2/18866 | 0.2270118 | 0.5338711 | 0.4830655 | 1 | SLC44A4    |
| Biological Process | GO:0048886 | neuromast hair cell differentiation                                                              | 1/2279 | 2/18866 | 0.2270118 | 0.5338711 | 0.4830655 | 1 | SLC44A4    |
| Biological Process | GO:0050653 | chondroitin sulfate proteoglycan biosynthetic process, polysaccharide chain biosynthetic process | 1/2279 | 2/18866 | 0.2270118 | 0.5338711 | 0.4830655 | 1 | CSGALNACT1 |
| Biological Process | GO:0050666 | regulation of homocysteine metabolic process                                                     | 1/2279 | 2/18866 | 0.2270118 | 0.5338711 | 0.4830655 | 1 | COMT       |
| Biological Process | GO:0050787 | detoxification of mercury ion                                                                    | 1/2279 | 2/18866 | 0.2270118 | 0.5338711 | 0.4830655 | 1 | ABCC2      |
| Biological Process | GO:0050992 | dimethylallyl diphosphate biosynthetic process                                                   | 1/2279 | 2/18866 | 0.2270118 | 0.5338711 | 0.4830655 | 1 | IDI1       |

|                    |            |                                                            |        |         |           |           |           |   |         |
|--------------------|------------|------------------------------------------------------------|--------|---------|-----------|-----------|-----------|---|---------|
| Biological Process | GO:0050993 | dimethylallyl diphosphate metabolic process                | 1/2279 | 2/18866 | 0.2270118 | 0.5338711 | 0.4830655 | 1 | IDI1    |
| Biological Process | GO:0051134 | negative regulation of NK T cell activation                | 1/2279 | 2/18866 | 0.2270118 | 0.5338711 | 0.4830655 | 1 | ZBTB7B  |
| Biological Process | GO:0051352 | negative regulation of ligase activity                     | 1/2279 | 2/18866 | 0.2270118 | 0.5338711 | 0.4830655 | 1 | TFIP11  |
| Biological Process | GO:0051389 | inactivation of MAPKK activity                             | 1/2279 | 2/18866 | 0.2270118 | 0.5338711 | 0.4830655 | 1 | IGF1R   |
| Biological Process | GO:0051563 | smooth endoplasmic reticulum calcium ion homeostasis       | 1/2279 | 2/18866 | 0.2270118 | 0.5338711 | 0.4830655 | 1 | APP     |
| Biological Process | GO:0051958 | methotrexate transport                                     | 1/2279 | 2/18866 | 0.2270118 | 0.5338711 | 0.4830655 | 1 | SLC19A1 |
| Biological Process | GO:0051977 | lysophospholipid transport                                 | 1/2279 | 2/18866 | 0.2270118 | 0.5338711 | 0.4830655 | 1 | MFSD2A  |
| Biological Process | GO:0052027 | modulation by symbiont of host signal transduction pathway | 1/2279 | 2/18866 | 0.2270118 | 0.5338711 | 0.4830655 | 1 | TNIP1   |
| Biological Process | GO:0052314 | phytoalexin metabolic process                              | 1/2279 | 2/18866 | 0.2270118 | 0.5338711 | 0.4830655 | 1 | DDC     |

|                    |            |                                                                               |        |         |           |           |           |   |          |
|--------------------|------------|-------------------------------------------------------------------------------|--------|---------|-----------|-----------|-----------|---|----------|
| Biological Process | GO:0060031 | mediolateral intercalation                                                    | 1/2279 | 2/18866 | 0.2270118 | 0.5338711 | 0.4830655 | 1 | WNT11    |
| Biological Process | GO:0060057 | apoptotic process involved in mammary gland involution                        | 1/2279 | 2/18866 | 0.2270118 | 0.5338711 | 0.4830655 | 1 | VDR      |
| Biological Process | GO:0060058 | positive regulation of apoptotic process involved in mammary gland involution | 1/2279 | 2/18866 | 0.2270118 | 0.5338711 | 0.4830655 | 1 | VDR      |
| Biological Process | GO:0060060 | post-embryonic retina morphogenesis in camera-type eye                        | 1/2279 | 2/18866 | 0.2270118 | 0.5338711 | 0.4830655 | 1 | CRB1     |
| Biological Process | GO:0060279 | positive regulation of ovulation                                              | 1/2279 | 2/18866 | 0.2270118 | 0.5338711 | 0.4830655 | 1 | INHBA    |
| Biological Process | GO:0060302 | negative regulation of cytokine activity                                      | 1/2279 | 2/18866 | 0.2270118 | 0.5338711 | 0.4830655 | 1 | IL10     |
| Biological Process | GO:0060375 | regulation of mast cell differentiation                                       | 1/2279 | 2/18866 | 0.2270118 | 0.5338711 | 0.4830655 | 1 | ZFPM1    |
| Biological Process | GO:0060378 | regulation of brood size                                                      | 1/2279 | 2/18866 | 0.2270118 | 0.5338711 | 0.4830655 | 1 | SH3PXD2B |
| Biological Process | GO:0060434 | bronchus morphogenesis                                                        | 1/2279 | 2/18866 | 0.2270118 | 0.5338711 | 0.4830655 | 1 | TGFBR2   |



|                    |            |                                                                              |        |         |           |           |           |   |         |
|--------------------|------------|------------------------------------------------------------------------------|--------|---------|-----------|-----------|-----------|---|---------|
| Biological Process | GO:0060459 | left lung development                                                        | 1/2279 | 2/18866 | 0.2270118 | 0.5338711 | 0.4830655 | 1 | NODAL   |
| Biological Process | GO:0060567 | negative regulation of DNA-templated transcription, termination              | 1/2279 | 2/18866 | 0.2270118 | 0.5338711 | 0.4830655 | 1 | SCAF8   |
| Biological Process | GO:0060694 | regulation of cholesterol transporter activity                               | 1/2279 | 2/18866 | 0.2270118 | 0.5338711 | 0.4830655 | 1 | PPARG   |
| Biological Process | GO:0060730 | regulation of intestinal epithelial structure maintenance                    | 1/2279 | 2/18866 | 0.2270118 | 0.5338711 | 0.4830655 | 1 | SLC22A5 |
| Biological Process | GO:0060775 | planar cell polarity pathway involved in gastrula mediolateral intercalation | 1/2279 | 2/18866 | 0.2270118 | 0.5338711 | 0.4830655 | 1 | WNT11   |
| Biological Process | GO:0060816 | random inactivation of X chromosome                                          | 1/2279 | 2/18866 | 0.2270118 | 0.5338711 | 0.4830655 | 1 | CDYL    |
| Biological Process | GO:0060819 | inactivation of X chromosome by genetic imprinting                           | 1/2279 | 2/18866 | 0.2270118 | 0.5338711 | 0.4830655 | 1 | PCGF3   |
| Biological Process | GO:0060922 | atrioventricular node cell differentiation                                   | 1/2279 | 2/18866 | 0.2270118 | 0.5338711 | 0.4830655 | 1 | MAML1   |
| Biological Process | GO:0060928 | atrioventricular node cell development                                       | 1/2279 | 2/18866 | 0.2270118 | 0.5338711 | 0.4830655 | 1 | MAML1   |

|                    |            |                                                                               |        |         |           |           |           |   |       |
|--------------------|------------|-------------------------------------------------------------------------------|--------|---------|-----------|-----------|-----------|---|-------|
| Biological Process | GO:0061015 | snRNA import into nucleus                                                     | 1/2279 | 2/18866 | 0.2270118 | 0.5338711 | 0.4830655 | 1 | SNUPN |
| Biological Process | GO:0061193 | taste bud development                                                         | 1/2279 | 2/18866 | 0.2270118 | 0.5338711 | 0.4830655 | 1 | NTF4  |
| Biological Process | GO:0061366 | behavioral response to chemical pain                                          | 1/2279 | 2/18866 | 0.2270118 | 0.5338711 | 0.4830655 | 1 | NTRK1 |
| Biological Process | GO:0061368 | behavioral response to formalin induced pain                                  | 1/2279 | 2/18866 | 0.2270118 | 0.5338711 | 0.4830655 | 1 | NTRK1 |
| Biological Process | GO:0061373 | mamillary axonal complex development                                          | 1/2279 | 2/18866 | 0.2270118 | 0.5338711 | 0.4830655 | 1 | ZEB2  |
| Biological Process | GO:0061552 | ganglion morphogenesis                                                        | 1/2279 | 2/18866 | 0.2270118 | 0.5338711 | 0.4830655 | 1 | NRP2  |
| Biological Process | GO:0061582 | intestinal epithelial cell migration                                          | 1/2279 | 2/18866 | 0.2270118 | 0.5338711 | 0.4830655 | 1 | ARSB  |
| Biological Process | GO:0061741 | chaperone-mediated protein transport involved in chaperone-mediated autophagy | 1/2279 | 2/18866 | 0.2270118 | 0.5338711 | 0.4830655 | 1 | CLU   |
| Biological Process | GO:0061795 | Golgi lumen acidification                                                     | 1/2279 | 2/18866 | 0.2270118 | 0.5338711 | 0.4830655 | 1 | UBE3A |

|                    |            |                                                                 |        |         |           |           |           |   |         |
|--------------------|------------|-----------------------------------------------------------------|--------|---------|-----------|-----------|-----------|---|---------|
| Biological Process | GO:0061901 | regulation of 1-phosphatidylinositol-3-kinase activity          | 1/2279 | 2/18866 | 0.2270118 | 0.5338711 | 0.4830655 | 1 | FPR2    |
| Biological Process | GO:0061903 | positive regulation of 1-phosphatidylinositol-3-kinase activity | 1/2279 | 2/18866 | 0.2270118 | 0.5338711 | 0.4830655 | 1 | FPR2    |
| Biological Process | GO:0062111 | zinc ion import into organelle                                  | 1/2279 | 2/18866 | 0.2270118 | 0.5338711 | 0.4830655 | 1 | TMEM163 |
| Biological Process | GO:0070165 | positive regulation of adiponectin secretion                    | 1/2279 | 2/18866 | 0.2270118 | 0.5338711 | 0.4830655 | 1 | C1QTNF3 |
| Biological Process | GO:0070453 | regulation of heme biosynthetic process                         | 1/2279 | 2/18866 | 0.2270118 | 0.5338711 | 0.4830655 | 1 | TMEM14C |
| Biological Process | GO:0070488 | neutrophil aggregation                                          | 1/2279 | 2/18866 | 0.2270118 | 0.5338711 | 0.4830655 | 1 | S100A8  |
| Biological Process | GO:0070889 | platelet alpha granule organization                             | 1/2279 | 2/18866 | 0.2270118 | 0.5338711 | 0.4830655 | 1 | ZNF385A |
| Biological Process | GO:0070898 | RNA polymerase III preinitiation complex assembly               | 1/2279 | 2/18866 | 0.2270118 | 0.5338711 | 0.4830655 | 1 | BRF1    |
| Biological Process | GO:0070904 | transepithelial L-ascorbic acid transport                       | 1/2279 | 2/18866 | 0.2270118 | 0.5338711 | 0.4830655 | 1 | SLC23A1 |

|                    |            |                                                                                  |        |         |           |           |           |   |        |
|--------------------|------------|----------------------------------------------------------------------------------|--------|---------|-----------|-----------|-----------|---|--------|
| Biological Process | GO:0070947 | neutrophil-mediated killing of fungus                                            | 1/2279 | 2/18866 | 0.2270118 | 0.5338711 | 0.4830655 | 1 | ELANE  |
| Biological Process | GO:0071031 | nuclear mRNA surveillance of mRNA 3'-end processing                              | 1/2279 | 2/18866 | 0.2270118 | 0.5338711 | 0.4830655 | 1 | EXOSC2 |
| Biological Process | GO:0071049 | nuclear retention of pre-mRNA with aberrant 3'-ends at the site of transcription | 1/2279 | 2/18866 | 0.2270118 | 0.5338711 | 0.4830655 | 1 | EXOSC2 |
| Biological Process | GO:0071105 | response to interleukin-11                                                       | 1/2279 | 2/18866 | 0.2270118 | 0.5338711 | 0.4830655 | 1 | SBNO2  |
| Biological Process | GO:0071306 | cellular response to vitamin E                                                   | 1/2279 | 2/18866 | 0.2270118 | 0.5338711 | 0.4830655 | 1 | PPARG  |
| Biological Process | GO:0071403 | cellular response to high density lipoprotein particle stimulus                  | 1/2279 | 2/18866 | 0.2270118 | 0.5338711 | 0.4830655 | 1 | ABCG1  |
| Biological Process | GO:0071469 | cellular response to alkaline pH                                                 | 1/2279 | 2/18866 | 0.2270118 | 0.5338711 | 0.4830655 | 1 | INSRR  |
| Biological Process | GO:0071505 | response to mycophenolic acid                                                    | 1/2279 | 2/18866 | 0.2270118 | 0.5338711 | 0.4830655 | 1 | PDGFB  |
| Biological Process | GO:0071506 | cellular response to mycophenolic acid                                           | 1/2279 | 2/18866 | 0.2270118 | 0.5338711 | 0.4830655 | 1 | PDGFB  |

|                    |            |                                                                                                         |        |         |           |           |           |   |       |
|--------------------|------------|---------------------------------------------------------------------------------------------------------|--------|---------|-----------|-----------|-----------|---|-------|
| Biological Process | GO:0071874 | cellular response to norepinephrine stimulus                                                            | 1/2279 | 2/18866 | 0.2270118 | 0.5338711 | 0.4830655 | 1 | APP   |
| Biological Process | GO:0071988 | protein localization to spindle pole body                                                               | 1/2279 | 2/18866 | 0.2270118 | 0.5338711 | 0.4830655 | 1 | NUMA1 |
| Biological Process | GO:0072004 | kidney field specification                                                                              | 1/2279 | 2/18866 | 0.2270118 | 0.5338711 | 0.4830655 | 1 | PAX2  |
| Biological Process | GO:0072209 | metanephric mesangial cell differentiation                                                              | 1/2279 | 2/18866 | 0.2270118 | 0.5338711 | 0.4830655 | 1 | PDGFB |
| Biological Process | GO:0072237 | metanephric proximal tubule development                                                                 | 1/2279 | 2/18866 | 0.2270118 | 0.5338711 | 0.4830655 | 1 | ACAT1 |
| Biological Process | GO:0072254 | metanephric glomerular mesangial cell differentiation                                                   | 1/2279 | 2/18866 | 0.2270118 | 0.5338711 | 0.4830655 | 1 | PDGFB |
| Biological Process | GO:0072304 | regulation of mesenchymal cell apoptotic process involved in metanephric nephron morphogenesis          | 1/2279 | 2/18866 | 0.2270118 | 0.5338711 | 0.4830655 | 1 | PAX2  |
| Biological Process | GO:0072305 | negative regulation of mesenchymal cell apoptotic process involved in metanephric nephron morphogenesis | 1/2279 | 2/18866 | 0.2270118 | 0.5338711 | 0.4830655 | 1 | PAX2  |
| Biological Process | GO:0072309 | mesenchymal stem cell maintenance involved in metanephric nephron morphogenesis                         | 1/2279 | 2/18866 | 0.2270118 | 0.5338711 | 0.4830655 | 1 | PAX2  |

|                    |            |                                                                                 |        |         |           |           |           |   |         |
|--------------------|------------|---------------------------------------------------------------------------------|--------|---------|-----------|-----------|-----------|---|---------|
| Biological Process | GO:0072343 | pancreatic stellate cell proliferation                                          | 1/2279 | 2/18866 | 0.2270118 | 0.5338711 | 0.4830655 | 1 | PPARG   |
| Biological Process | GO:0072554 | blood vessel lumenization                                                       | 1/2279 | 2/18866 | 0.2270118 | 0.5338711 | 0.4830655 | 1 | RBPJ    |
| Biological Process | GO:0072560 | type B pancreatic cell maturation                                               | 1/2279 | 2/18866 | 0.2270118 | 0.5338711 | 0.4830655 | 1 | RFX3    |
| Biological Process | GO:0072564 | blood microparticle formation                                                   | 1/2279 | 2/18866 | 0.2270118 | 0.5338711 | 0.4830655 | 1 | TNF     |
| Biological Process | GO:0072573 | tolerance induction to lipopolysaccharide                                       | 1/2279 | 2/18866 | 0.2270118 | 0.5338711 | 0.4830655 | 1 | TNFAIP3 |
| Biological Process | GO:0072720 | response to dithiothreitol                                                      | 1/2279 | 2/18866 | 0.2270118 | 0.5338711 | 0.4830655 | 1 | KAT7    |
| Biological Process | GO:0072739 | response to anisomycin                                                          | 1/2279 | 2/18866 | 0.2270118 | 0.5338711 | 0.4830655 | 1 | KAT7    |
| Biological Process | GO:0072752 | cellular response to rapamycin                                                  | 1/2279 | 2/18866 | 0.2270118 | 0.5338711 | 0.4830655 | 1 | LARP1   |
| Biological Process | GO:0086021 | SA node cell to atrial cardiac muscle cell communication by electrical coupling | 1/2279 | 2/18866 | 0.2270118 | 0.5338711 | 0.4830655 | 1 | GJA5    |

|                    |            |                                                                              |        |         |           |           |           |   |         |
|--------------------|------------|------------------------------------------------------------------------------|--------|---------|-----------|-----------|-----------|---|---------|
| Biological Process | GO:0086053 | AV node cell to bundle of His cell communication by electrical coupling      | 1/2279 | 2/18866 | 0.2270118 | 0.5338711 | 0.4830655 | 1 | GJA5    |
| Biological Process | GO:0086097 | phospholipase C-activating angiotensin-activated signaling pathway           | 1/2279 | 2/18866 | 0.2270118 | 0.5338711 | 0.4830655 | 1 | AGTR1   |
| Biological Process | GO:0090149 | mitochondrial membrane fission                                               | 1/2279 | 2/18866 | 0.2270118 | 0.5338711 | 0.4830655 | 1 | DNM1L   |
| Biological Process | GO:0090164 | asymmetric Golgi ribbon formation                                            | 1/2279 | 2/18866 | 0.2270118 | 0.5338711 | 0.4830655 | 1 | MYO18A  |
| Biological Process | GO:0090182 | regulation of secretion of lysosomal enzymes                                 | 1/2279 | 2/18866 | 0.2270118 | 0.5338711 | 0.4830655 | 1 | NR1H2   |
| Biological Process | GO:0090187 | positive regulation of pancreatic juice secretion                            | 1/2279 | 2/18866 | 0.2270118 | 0.5338711 | 0.4830655 | 1 | NR1H2   |
| Biological Process | GO:0090191 | negative regulation of branching involved in ureteric bud morphogenesis      | 1/2279 | 2/18866 | 0.2270118 | 0.5338711 | 0.4830655 | 1 | TACSTD2 |
| Biological Process | GO:0090265 | positive regulation of immune complex clearance by monocytes and macrophages | 1/2279 | 2/18866 | 0.2270118 | 0.5338711 | 0.4830655 | 1 | CCR2    |
| Biological Process | GO:0090291 | negative regulation of osteoclast proliferation                              | 1/2279 | 2/18866 | 0.2270118 | 0.5338711 | 0.4830655 | 1 | TNFAIP3 |

|                    |            |                                           |        |         |           |           |           |   |        |
|--------------------|------------|-------------------------------------------|--------|---------|-----------|-----------|-----------|---|--------|
| Biological Process | GO:0090345 | cellular organohalogen metabolic process  | 1/2279 | 2/18866 | 0.2270118 | 0.5338711 | 0.4830655 | 1 | POR    |
| Biological Process | GO:0090346 | cellular organofluorine metabolic process | 1/2279 | 2/18866 | 0.2270118 | 0.5338711 | 0.4830655 | 1 | POR    |
| Biological Process | GO:0090615 | mitochondrial mRNA processing             | 1/2279 | 2/18866 | 0.2270118 | 0.5338711 | 0.4830655 | 1 | TBRG4  |
| Biological Process | GO:0090675 | intermicrovillar adhesion                 | 1/2279 | 2/18866 | 0.2270118 | 0.5338711 | 0.4830655 | 1 | CDHR2  |
| Biological Process | GO:0097102 | endothelial tip cell fate specification   | 1/2279 | 2/18866 | 0.2270118 | 0.5338711 | 0.4830655 | 1 | DLL1   |
| Biological Process | GO:0097324 | melanocyte migration                      | 1/2279 | 2/18866 | 0.2270118 | 0.5338711 | 0.4830655 | 1 | ZEB2   |
| Biological Process | GO:0097528 | execution phase of necroptosis            | 1/2279 | 2/18866 | 0.2270118 | 0.5338711 | 0.4830655 | 1 | RIPK3  |
| Biological Process | GO:0097707 | ferroptosis                               | 1/2279 | 2/18866 | 0.2270118 | 0.5338711 | 0.4830655 | 1 | AIFM2  |
| Biological Process | GO:0097750 | endosome membrane tubulation              | 1/2279 | 2/18866 | 0.2270118 | 0.5338711 | 0.4830655 | 1 | CORO1C |



|                    |            |                                                                      |        |         |           |           |           |   |         |
|--------------------|------------|----------------------------------------------------------------------|--------|---------|-----------|-----------|-----------|---|---------|
| Biological Process | GO:0098630 | aggregation of unicellular organisms                                 | 1/2279 | 2/18866 | 0.2270118 | 0.5338711 | 0.4830655 | 1 | LTF     |
| Biological Process | GO:0098795 | mRNA cleavage involved in gene silencing                             | 1/2279 | 2/18866 | 0.2270118 | 0.5338711 | 0.4830655 | 1 | AGO2    |
| Biological Process | GO:0098886 | modification of dendritic spine                                      | 1/2279 | 2/18866 | 0.2270118 | 0.5338711 | 0.4830655 | 1 | SYNPO   |
| Biological Process | GO:0098905 | regulation of bundle of His cell action potential                    | 1/2279 | 2/18866 | 0.2270118 | 0.5338711 | 0.4830655 | 1 | GJA5    |
| Biological Process | GO:0098907 | regulation of SA node cell action potential                          | 1/2279 | 2/18866 | 0.2270118 | 0.5338711 | 0.4830655 | 1 | ANK2    |
| Biological Process | GO:0099178 | regulation of retrograde trans-synaptic signaling by endocannabinoid | 1/2279 | 2/18866 | 0.2270118 | 0.5338711 | 0.4830655 | 1 | PLCB1   |
| Biological Process | GO:0099180 | zinc ion import into synaptic vesicle                                | 1/2279 | 2/18866 | 0.2270118 | 0.5338711 | 0.4830655 | 1 | TMEM163 |
| Biological Process | GO:0099403 | maintenance of mitotic sister chromatid cohesion, telomeric          | 1/2279 | 2/18866 | 0.2270118 | 0.5338711 | 0.4830655 | 1 | TNKS    |
| Biological Process | GO:0099404 | mitotic sister chromatid cohesion, telomeric                         | 1/2279 | 2/18866 | 0.2270118 | 0.5338711 | 0.4830655 | 1 | TNKS    |

|                    |            |                                                                       |        |         |           |           |           |   |        |
|--------------------|------------|-----------------------------------------------------------------------|--------|---------|-----------|-----------|-----------|---|--------|
| Biological Process | GO:0099642 | retrograde axonal protein transport                                   | 1/2279 | 2/18866 | 0.2270118 | 0.5338711 | 0.4830655 | 1 | MAP1A  |
| Biological Process | GO:0110075 | regulation of ferroptosis                                             | 1/2279 | 2/18866 | 0.2270118 | 0.5338711 | 0.4830655 | 1 | AIFM2  |
| Biological Process | GO:0110076 | negative regulation of ferroptosis                                    | 1/2279 | 2/18866 | 0.2270118 | 0.5338711 | 0.4830655 | 1 | AIFM2  |
| Biological Process | GO:0110091 | negative regulation of hippocampal neuron apoptotic process           | 1/2279 | 2/18866 | 0.2270118 | 0.5338711 | 0.4830655 | 1 | CX3CR1 |
| Biological Process | GO:0120054 | intestinal motility                                                   | 1/2279 | 2/18866 | 0.2270118 | 0.5338711 | 0.4830655 | 1 | GHRL   |
| Biological Process | GO:0120055 | small intestinal transit                                              | 1/2279 | 2/18866 | 0.2270118 | 0.5338711 | 0.4830655 | 1 | GHRL   |
| Biological Process | GO:0120057 | regulation of small intestinal transit                                | 1/2279 | 2/18866 | 0.2270118 | 0.5338711 | 0.4830655 | 1 | GHRL   |
| Biological Process | GO:0120058 | positive regulation of small intestinal transit                       | 1/2279 | 2/18866 | 0.2270118 | 0.5338711 | 0.4830655 | 1 | GHRL   |
| Biological Process | GO:0120191 | negative regulation of termination of RNA polymerase II transcription | 1/2279 | 2/18866 | 0.2270118 | 0.5338711 | 0.4830655 | 1 | SCAF8  |

|                    |            |                                                                                     |        |         |           |           |           |   |        |
|--------------------|------------|-------------------------------------------------------------------------------------|--------|---------|-----------|-----------|-----------|---|--------|
| Biological Process | GO:0140066 | peptidyl-lysine crotonylation                                                       | 1/2279 | 2/18866 | 0.2270118 | 0.5338711 | 0.4830655 | 1 | CDYL   |
| Biological Process | GO:1900052 | regulation of retinoic acid biosynthetic process                                    | 1/2279 | 2/18866 | 0.2270118 | 0.5338711 | 0.4830655 | 1 | RDH10  |
| Biological Process | GO:1900110 | negative regulation of histone H3-K9 dimethylation                                  | 1/2279 | 2/18866 | 0.2270118 | 0.5338711 | 0.4830655 | 1 | PIH1D1 |
| Biological Process | GO:1900169 | regulation of glucocorticoid mediated signaling pathway                             | 1/2279 | 2/18866 | 0.2270118 | 0.5338711 | 0.4830655 | 1 | AKAP13 |
| Biological Process | GO:1900190 | regulation of single-species biofilm formation                                      | 1/2279 | 2/18866 | 0.2270118 | 0.5338711 | 0.4830655 | 1 | LTF    |
| Biological Process | GO:1900191 | negative regulation of single-species biofilm formation                             | 1/2279 | 2/18866 | 0.2270118 | 0.5338711 | 0.4830655 | 1 | LTF    |
| Biological Process | GO:1900204 | apoptotic process involved in metanephric collecting duct development               | 1/2279 | 2/18866 | 0.2270118 | 0.5338711 | 0.4830655 | 1 | PAX2   |
| Biological Process | GO:1900205 | apoptotic process involved in metanephric nephron tubule development                | 1/2279 | 2/18866 | 0.2270118 | 0.5338711 | 0.4830655 | 1 | PAX2   |
| Biological Process | GO:1900214 | regulation of apoptotic process involved in metanephric collecting duct development | 1/2279 | 2/18866 | 0.2270118 | 0.5338711 | 0.4830655 | 1 | PAX2   |

|                    |            |                                                                                                                   |        |         |           |           |           |   |        |
|--------------------|------------|-------------------------------------------------------------------------------------------------------------------|--------|---------|-----------|-----------|-----------|---|--------|
| Biological Process | GO:1900215 | negative regulation of apoptotic process involved in metanephric collecting duct development                      | 1/2279 | 2/18866 | 0.2270118 | 0.5338711 | 0.4830655 | 1 | PAX2   |
| Biological Process | GO:1900217 | regulation of apoptotic process involved in metanephric nephron tubule development                                | 1/2279 | 2/18866 | 0.2270118 | 0.5338711 | 0.4830655 | 1 | PAX2   |
| Biological Process | GO:1900218 | negative regulation of apoptotic process involved in metanephric nephron tubule development                       | 1/2279 | 2/18866 | 0.2270118 | 0.5338711 | 0.4830655 | 1 | PAX2   |
| Biological Process | GO:1900220 | semaphorin-plexin signaling pathway involved in bone trabecula morphogenesis                                      | 1/2279 | 2/18866 | 0.2270118 | 0.5338711 | 0.4830655 | 1 | SEMA4D |
| Biological Process | GO:1900224 | positive regulation of nodal signaling pathway involved in determination of lateral mesoderm left/right asymmetry | 1/2279 | 2/18866 | 0.2270118 | 0.5338711 | 0.4830655 | 1 | NODAL  |
| Biological Process | GO:1900228 | regulation of single-species biofilm formation in or on host organism                                             | 1/2279 | 2/18866 | 0.2270118 | 0.5338711 | 0.4830655 | 1 | LTF    |
| Biological Process | GO:1900229 | negative regulation of single-species biofilm formation in or on host organism                                    | 1/2279 | 2/18866 | 0.2270118 | 0.5338711 | 0.4830655 | 1 | LTF    |
| Biological Process | GO:1900248 | negative regulation of cytoplasmic translational elongation                                                       | 1/2279 | 2/18866 | 0.2270118 | 0.5338711 | 0.4830655 | 1 | CPEB3  |
| Biological Process | GO:1900533 | palmitic acid metabolic process                                                                                   | 1/2279 | 2/18866 | 0.2270118 | 0.5338711 | 0.4830655 | 1 | ACOT7  |

|                    |            |                                                                                  |        |         |           |           |           |   |         |
|--------------------|------------|----------------------------------------------------------------------------------|--------|---------|-----------|-----------|-----------|---|---------|
| Biological Process | GO:1900535 | palmitic acid biosynthetic process                                               | 1/2279 | 2/18866 | 0.2270118 | 0.5338711 | 0.4830655 | 1 | ACOT7   |
| Biological Process | GO:1901147 | mesenchymal cell apoptotic process involved in metanephric nephron morphogenesis | 1/2279 | 2/18866 | 0.2270118 | 0.5338711 | 0.4830655 | 1 | PAX2    |
| Biological Process | GO:1901187 | regulation of ephrin receptor signaling pathway                                  | 1/2279 | 2/18866 | 0.2270118 | 0.5338711 | 0.4830655 | 1 | RBPJ    |
| Biological Process | GO:1901255 | nucleotide-excision repair involved in interstrand cross-link repair             | 1/2279 | 2/18866 | 0.2270118 | 0.5338711 | 0.4830655 | 1 | XPA     |
| Biological Process | GO:1901337 | thioester transport                                                              | 1/2279 | 2/18866 | 0.2270118 | 0.5338711 | 0.4830655 | 1 | SLC33A1 |
| Biological Process | GO:1901377 | organic heteropentacyclic compound catabolic process                             | 1/2279 | 2/18866 | 0.2270118 | 0.5338711 | 0.4830655 | 1 | NFE2L2  |
| Biological Process | GO:1901383 | negative regulation of chorionic trophoblast cell proliferation                  | 1/2279 | 2/18866 | 0.2270118 | 0.5338711 | 0.4830655 | 1 | NODAL   |
| Biological Process | GO:1901463 | regulation of tetrapyrrole biosynthetic process                                  | 1/2279 | 2/18866 | 0.2270118 | 0.5338711 | 0.4830655 | 1 | TMEM14C |
| Biological Process | GO:1901558 | response to metformin                                                            | 1/2279 | 2/18866 | 0.2270118 | 0.5338711 | 0.4830655 | 1 | PPARG   |

|                    |            |                                                          |        |         |           |           |           |   |       |
|--------------------|------------|----------------------------------------------------------|--------|---------|-----------|-----------|-----------|---|-------|
| Biological Process | GO:1901647 | positive regulation of synoviocyte proliferation         | 1/2279 | 2/18866 | 0.2270118 | 0.5338711 | 0.4830655 | 1 | TNF   |
| Biological Process | GO:1901674 | regulation of histone H3-K27 acetylation                 | 1/2279 | 2/18866 | 0.2270118 | 0.5338711 | 0.4830655 | 1 | LIF   |
| Biological Process | GO:1901898 | negative regulation of relaxation of cardiac muscle      | 1/2279 | 2/18866 | 0.2270118 | 0.5338711 | 0.4830655 | 1 | PDE4D |
| Biological Process | GO:1902283 | negative regulation of primary amine oxidase activity    | 1/2279 | 2/18866 | 0.2270118 | 0.5338711 | 0.4830655 | 1 | PRKN  |
| Biological Process | GO:1902298 | cell cycle DNA replication maintenance of fidelity       | 1/2279 | 2/18866 | 0.2270118 | 0.5338711 | 0.4830655 | 1 | BRCA2 |
| Biological Process | GO:1902435 | regulation of male mating behavior                       | 1/2279 | 2/18866 | 0.2270118 | 0.5338711 | 0.4830655 | 1 | HDAC4 |
| Biological Process | GO:1902437 | positive regulation of male mating behavior              | 1/2279 | 2/18866 | 0.2270118 | 0.5338711 | 0.4830655 | 1 | HDAC4 |
| Biological Process | GO:1902528 | regulation of protein linear polyubiquitination          | 1/2279 | 2/18866 | 0.2270118 | 0.5338711 | 0.4830655 | 1 | PRKN  |
| Biological Process | GO:1902530 | positive regulation of protein linear polyubiquitination | 1/2279 | 2/18866 | 0.2270118 | 0.5338711 | 0.4830655 | 1 | PRKN  |

|                    |            |                                                                                                              |        |         |           |           |           |   |        |
|--------------------|------------|--------------------------------------------------------------------------------------------------------------|--------|---------|-----------|-----------|-----------|---|--------|
| Biological Process | GO:1902567 | negative regulation of eosinophil activation                                                                 | 1/2279 | 2/18866 | 0.2270118 | 0.5338711 | 0.4830655 | 1 | CCR2   |
| Biological Process | GO:1902748 | positive regulation of lens fiber cell differentiation                                                       | 1/2279 | 2/18866 | 0.2270118 | 0.5338711 | 0.4830655 | 1 | ZEB2   |
| Biological Process | GO:1902767 | isoprenoid biosynthetic process via mevalonate                                                               | 1/2279 | 2/18866 | 0.2270118 | 0.5338711 | 0.4830655 | 1 | HMGCS1 |
| Biological Process | GO:1902908 | regulation of melanosome transport                                                                           | 1/2279 | 2/18866 | 0.2270118 | 0.5338711 | 0.4830655 | 1 | CDH3   |
| Biological Process | GO:1902954 | regulation of early endosome to recycling endosome transport                                                 | 1/2279 | 2/18866 | 0.2270118 | 0.5338711 | 0.4830655 | 1 | SORL1  |
| Biological Process | GO:1902962 | regulation of metalloendopeptidase activity involved in amyloid precursor protein catabolic process          | 1/2279 | 2/18866 | 0.2270118 | 0.5338711 | 0.4830655 | 1 | SORL1  |
| Biological Process | GO:1902963 | negative regulation of metalloendopeptidase activity involved in amyloid precursor protein catabolic process | 1/2279 | 2/18866 | 0.2270118 | 0.5338711 | 0.4830655 | 1 | SORL1  |
| Biological Process | GO:1903028 | positive regulation of opsonization                                                                          | 1/2279 | 2/18866 | 0.2270118 | 0.5338711 | 0.4830655 | 1 | MYO18A |
| Biological Process | GO:1903056 | regulation of melanosome organization                                                                        | 1/2279 | 2/18866 | 0.2270118 | 0.5338711 | 0.4830655 | 1 | ZEB2   |

|                    |            |                                                                                                          |        |         |           |           |           |   |        |
|--------------------|------------|----------------------------------------------------------------------------------------------------------|--------|---------|-----------|-----------|-----------|---|--------|
| Biological Process | GO:1903109 | positive regulation of mitochondrial transcription                                                       | 1/2279 | 2/18866 | 0.2270118 | 0.5338711 | 0.4830655 | 1 | PRKAA1 |
| Biological Process | GO:1903381 | regulation of endoplasmic reticulum stress-induced neuron intrinsic apoptotic signaling pathway          | 1/2279 | 2/18866 | 0.2270118 | 0.5338711 | 0.4830655 | 1 | PRKN   |
| Biological Process | GO:1903382 | negative regulation of endoplasmic reticulum stress-induced neuron intrinsic apoptotic signaling pathway | 1/2279 | 2/18866 | 0.2270118 | 0.5338711 | 0.4830655 | 1 | PRKN   |
| Biological Process | GO:1903393 | positive regulation of adherens junction organization                                                    | 1/2279 | 2/18866 | 0.2270118 | 0.5338711 | 0.4830655 | 1 | ADD1   |
| Biological Process | GO:1903433 | regulation of constitutive secretory pathway                                                             | 1/2279 | 2/18866 | 0.2270118 | 0.5338711 | 0.4830655 | 1 | RAB27A |
| Biological Process | GO:1903464 | negative regulation of mitotic cell cycle DNA replication                                                | 1/2279 | 2/18866 | 0.2270118 | 0.5338711 | 0.4830655 | 1 | CHEK2  |
| Biological Process | GO:1903515 | calcium ion transport from cytosol to endoplasmic reticulum                                              | 1/2279 | 2/18866 | 0.2270118 | 0.5338711 | 0.4830655 | 1 | ATP2A3 |
| Biological Process | GO:1903519 | regulation of mammary gland involution                                                                   | 1/2279 | 2/18866 | 0.2270118 | 0.5338711 | 0.4830655 | 1 | VDR    |
| Biological Process | GO:1903521 | positive regulation of mammary gland involution                                                          | 1/2279 | 2/18866 | 0.2270118 | 0.5338711 | 0.4830655 | 1 | VDR    |



|                    |            |                                                                         |        |         |           |           |           |   |         |
|--------------------|------------|-------------------------------------------------------------------------|--------|---------|-----------|-----------|-----------|---|---------|
| Biological Process | GO:1903537 | meiotic cell cycle process involved in oocyte maturation                | 1/2279 | 2/18866 | 0.2270118 | 0.5338711 | 0.4830655 | 1 | PPP2R1A |
| Biological Process | GO:1903538 | regulation of meiotic cell cycle process involved in oocyte maturation  | 1/2279 | 2/18866 | 0.2270118 | 0.5338711 | 0.4830655 | 1 | PPP2R1A |
| Biological Process | GO:1903567 | regulation of protein localization to ciliary membrane                  | 1/2279 | 2/18866 | 0.2270118 | 0.5338711 | 0.4830655 | 1 | LZTFL1  |
| Biological Process | GO:1903704 | negative regulation of production of siRNA involved in RNA interference | 1/2279 | 2/18866 | 0.2270118 | 0.5338711 | 0.4830655 | 1 | RMRP    |
| Biological Process | GO:1903786 | regulation of glutathione biosynthetic process                          | 1/2279 | 2/18866 | 0.2270118 | 0.5338711 | 0.4830655 | 1 | NFE2L2  |
| Biological Process | GO:1903849 | positive regulation of aorta morphogenesis                              | 1/2279 | 2/18866 | 0.2270118 | 0.5338711 | 0.4830655 | 1 | NOTCH1  |
| Biological Process | GO:1903860 | negative regulation of dendrite extension                               | 1/2279 | 2/18866 | 0.2270118 | 0.5338711 | 0.4830655 | 1 | BCL11A  |
| Biological Process | GO:1903905 | positive regulation of establishment of T cell polarity                 | 1/2279 | 2/18866 | 0.2270118 | 0.5338711 | 0.4830655 | 1 | DOCK8   |
| Biological Process | GO:1903939 | regulation of TORC2 signaling                                           | 1/2279 | 2/18866 | 0.2270118 | 0.5338711 | 0.4830655 | 1 | SIK3    |

|                    |            |                                                                                      |        |         |           |           |           |   |       |
|--------------------|------------|--------------------------------------------------------------------------------------|--------|---------|-----------|-----------|-----------|---|-------|
| Biological Process | GO:1903946 | negative regulation of ventricular cardiac muscle cell action potential              | 1/2279 | 2/18866 | 0.2270118 | 0.5338711 | 0.4830655 | 1 | BIN1  |
| Biological Process | GO:1903966 | monounsaturated fatty acid biosynthetic process                                      | 1/2279 | 2/18866 | 0.2270118 | 0.5338711 | 0.4830655 | 1 | SCD   |
| Biological Process | GO:1904028 | positive regulation of collagen fibril organization                                  | 1/2279 | 2/18866 | 0.2270118 | 0.5338711 | 0.4830655 | 1 | RB1   |
| Biological Process | GO:1904049 | negative regulation of spontaneous neurotransmitter secretion                        | 1/2279 | 2/18866 | 0.2270118 | 0.5338711 | 0.4830655 | 1 | PRKN  |
| Biological Process | GO:1904057 | negative regulation of sensory perception of pain                                    | 1/2279 | 2/18866 | 0.2270118 | 0.5338711 | 0.4830655 | 1 | IL10  |
| Biological Process | GO:1904155 | DN2 thymocyte differentiation                                                        | 1/2279 | 2/18866 | 0.2270118 | 0.5338711 | 0.4830655 | 1 | PTPRC |
| Biological Process | GO:1904161 | DNA synthesis involved in UV-damage excision repair                                  | 1/2279 | 2/18866 | 0.2270118 | 0.5338711 | 0.4830655 | 1 | POLD3 |
| Biological Process | GO:1904178 | negative regulation of adipose tissue development                                    | 1/2279 | 2/18866 | 0.2270118 | 0.5338711 | 0.4830655 | 1 | KLF7  |
| Biological Process | GO:1904211 | membrane protein proteolysis involved in retrograde protein transport, ER to cytosol | 1/2279 | 2/18866 | 0.2270118 | 0.5338711 | 0.4830655 | 1 | HM13  |

|                    |            |                                                                 |        |         |           |           |           |   |        |
|--------------------|------------|-----------------------------------------------------------------|--------|---------|-----------|-----------|-----------|---|--------|
| Biological Process | GO:1904245 | regulation of polynucleotide adenylyltransferase activity       | 1/2279 | 2/18866 | 0.2270118 | 0.5338711 | 0.4830655 | 1 | PABPN1 |
| Biological Process | GO:1904344 | regulation of gastric mucosal blood circulation                 | 1/2279 | 2/18866 | 0.2270118 | 0.5338711 | 0.4830655 | 1 | GHRL   |
| Biological Process | GO:1904346 | positive regulation of gastric mucosal blood circulation        | 1/2279 | 2/18866 | 0.2270118 | 0.5338711 | 0.4830655 | 1 | GHRL   |
| Biological Process | GO:1904426 | positive regulation of GTP binding                              | 1/2279 | 2/18866 | 0.2270118 | 0.5338711 | 0.4830655 | 1 | CLN5   |
| Biological Process | GO:1904515 | positive regulation of TORC2 signaling                          | 1/2279 | 2/18866 | 0.2270118 | 0.5338711 | 0.4830655 | 1 | SIK3   |
| Biological Process | GO:1904556 | L-tryptophan transmembrane transport                            | 1/2279 | 2/18866 | 0.2270118 | 0.5338711 | 0.4830655 | 1 | SLC7A5 |
| Biological Process | GO:1904576 | response to tunicamycin                                         | 1/2279 | 2/18866 | 0.2270118 | 0.5338711 | 0.4830655 | 1 | CLU    |
| Biological Process | GO:1904577 | cellular response to tunicamycin                                | 1/2279 | 2/18866 | 0.2270118 | 0.5338711 | 0.4830655 | 1 | CLU    |
| Biological Process | GO:1904674 | positive regulation of somatic stem cell population maintenance | 1/2279 | 2/18866 | 0.2270118 | 0.5338711 | 0.4830655 | 1 | LBH    |

|                    |            |                                                                                    |        |         |           |           |           |   |         |
|--------------------|------------|------------------------------------------------------------------------------------|--------|---------|-----------|-----------|-----------|---|---------|
| Biological Process | GO:1904743 | negative regulation of telomeric DNA binding                                       | 1/2279 | 2/18866 | 0.2270118 | 0.5338711 | 0.4830655 | 1 | TNKS    |
| Biological Process | GO:1904835 | dorsal root ganglion morphogenesis                                                 | 1/2279 | 2/18866 | 0.2270118 | 0.5338711 | 0.4830655 | 1 | NRP2    |
| Biological Process | GO:1904875 | regulation of DNA ligase activity                                                  | 1/2279 | 2/18866 | 0.2270118 | 0.5338711 | 0.4830655 | 1 | TFIP11  |
| Biological Process | GO:1904907 | regulation of maintenance of mitotic sister chromatid cohesion, telomeric          | 1/2279 | 2/18866 | 0.2270118 | 0.5338711 | 0.4830655 | 1 | TNKS    |
| Biological Process | GO:1904908 | negative regulation of maintenance of mitotic sister chromatid cohesion, telomeric | 1/2279 | 2/18866 | 0.2270118 | 0.5338711 | 0.4830655 | 1 | TNKS    |
| Biological Process | GO:1904979 | negative regulation of endosome organization                                       | 1/2279 | 2/18866 | 0.2270118 | 0.5338711 | 0.4830655 | 1 | PRKN    |
| Biological Process | GO:1905051 | regulation of base-excision repair                                                 | 1/2279 | 2/18866 | 0.2270118 | 0.5338711 | 0.4830655 | 1 | FAM168A |
| Biological Process | GO:1905053 | positive regulation of base-excision repair                                        | 1/2279 | 2/18866 | 0.2270118 | 0.5338711 | 0.4830655 | 1 | FAM168A |
| Biological Process | GO:1905175 | negative regulation of vascular associated smooth muscle cell dedifferentiation    | 1/2279 | 2/18866 | 0.2270118 | 0.5338711 | 0.4830655 | 1 | MIR145  |

|                    |            |                                                                      |        |         |           |           |           |   |         |
|--------------------|------------|----------------------------------------------------------------------|--------|---------|-----------|-----------|-----------|---|---------|
| Biological Process | GO:1905281 | positive regulation of retrograde transport, endosome to Golgi       | 1/2279 | 2/18866 | 0.2270118 | 0.5338711 | 0.4830655 | 1 | PRKN    |
| Biological Process | GO:1905365 | regulation of intraluminal vesicle formation                         | 1/2279 | 2/18866 | 0.2270118 | 0.5338711 | 0.4830655 | 1 | PRKN    |
| Biological Process | GO:1905366 | negative regulation of intraluminal vesicle formation                | 1/2279 | 2/18866 | 0.2270118 | 0.5338711 | 0.4830655 | 1 | PRKN    |
| Biological Process | GO:1905371 | ceramide phosphoethanolamine metabolic process                       | 1/2279 | 2/18866 | 0.2270118 | 0.5338711 | 0.4830655 | 1 | SGMS2   |
| Biological Process | GO:1905373 | ceramide phosphoethanolamine biosynthetic process                    | 1/2279 | 2/18866 | 0.2270118 | 0.5338711 | 0.4830655 | 1 | SGMS2   |
| Biological Process | GO:1905524 | negative regulation of protein autoubiquitination                    | 1/2279 | 2/18866 | 0.2270118 | 0.5338711 | 0.4830655 | 1 | MARCHF7 |
| Biological Process | GO:1905526 | regulation of Golgi lumen acidification                              | 1/2279 | 2/18866 | 0.2270118 | 0.5338711 | 0.4830655 | 1 | UBE3A   |
| Biological Process | GO:1905550 | regulation of protein localization to endoplasmic reticulum          | 1/2279 | 2/18866 | 0.2270118 | 0.5338711 | 0.4830655 | 1 | RTN4    |
| Biological Process | GO:1905552 | positive regulation of protein localization to endoplasmic reticulum | 1/2279 | 2/18866 | 0.2270118 | 0.5338711 | 0.4830655 | 1 | RTN4    |

|                    |            |                                                                                                                |        |         |           |           |           |   |        |
|--------------------|------------|----------------------------------------------------------------------------------------------------------------|--------|---------|-----------|-----------|-----------|---|--------|
| Biological Process | GO:1905696 | regulation of polysome binding                                                                                 | 1/2279 | 2/18866 | 0.2270118 | 0.5338711 | 0.4830655 | 1 | EIF4G1 |
| Biological Process | GO:1905775 | negative regulation of DNA helicase activity                                                                   | 1/2279 | 2/18866 | 0.2270118 | 0.5338711 | 0.4830655 | 1 | MCM2   |
| Biological Process | GO:1905799 | regulation of intracellular retrograde transport                                                               | 1/2279 | 2/18866 | 0.2270118 | 0.5338711 | 0.4830655 | 1 | TTC21B |
| Biological Process | GO:1905863 | invadopodium organization                                                                                      | 1/2279 | 2/18866 | 0.2270118 | 0.5338711 | 0.4830655 | 1 | NAV3   |
| Biological Process | GO:1905916 | negative regulation of cell differentiation involved in phenotypic switching                                   | 1/2279 | 2/18866 | 0.2270118 | 0.5338711 | 0.4830655 | 1 | DNMT1  |
| Biological Process | GO:1905931 | negative regulation of vascular associated smooth muscle cell differentiation involved in phenotypic switching | 1/2279 | 2/18866 | 0.2270118 | 0.5338711 | 0.4830655 | 1 | DNMT1  |
| Biological Process | GO:1990145 | maintenance of translational fidelity                                                                          | 1/2279 | 2/18866 | 0.2270118 | 0.5338711 | 0.4830655 | 1 | CDKAL1 |
| Biological Process | GO:1990267 | response to transition metal nanoparticle                                                                      | 1/2279 | 2/18866 | 0.2270118 | 0.5338711 | 0.4830655 | 1 | MPO    |
| Biological Process | GO:1990402 | embryonic liver development                                                                                    | 1/2279 | 2/18866 | 0.2270118 | 0.5338711 | 0.4830655 | 1 | TGFB1  |

|                    |            |                                                             |        |         |           |           |           |   |         |
|--------------------|------------|-------------------------------------------------------------|--------|---------|-----------|-----------|-----------|---|---------|
| Biological Process | GO:1990426 | mitotic recombination-dependent replication fork processing | 1/2279 | 2/18866 | 0.2270118 | 0.5338711 | 0.4830655 | 1 | BRCA2   |
| Biological Process | GO:1990505 | mitotic DNA replication maintenance of fidelity             | 1/2279 | 2/18866 | 0.2270118 | 0.5338711 | 0.4830655 | 1 | BRCA2   |
| Biological Process | GO:1990768 | gastric mucosal blood circulation                           | 1/2279 | 2/18866 | 0.2270118 | 0.5338711 | 0.4830655 | 1 | GHRL    |
| Biological Process | GO:2000229 | regulation of pancreatic stellate cell proliferation        | 1/2279 | 2/18866 | 0.2270118 | 0.5338711 | 0.4830655 | 1 | PPARG   |
| Biological Process | GO:2000329 | negative regulation of T-helper 17 cell lineage commitment  | 1/2279 | 2/18866 | 0.2270118 | 0.5338711 | 0.4830655 | 1 | LOXL3   |
| Biological Process | GO:2000332 | regulation of blood microparticle formation                 | 1/2279 | 2/18866 | 0.2270118 | 0.5338711 | 0.4830655 | 1 | TNF     |
| Biological Process | GO:2000334 | positive regulation of blood microparticle formation        | 1/2279 | 2/18866 | 0.2270118 | 0.5338711 | 0.4830655 | 1 | TNF     |
| Biological Process | GO:2000349 | negative regulation of CD40 signaling pathway               | 1/2279 | 2/18866 | 0.2270118 | 0.5338711 | 0.4830655 | 1 | TNFAIP3 |
| Biological Process | GO:2000393 | negative regulation of lamellipodium morphogenesis          | 1/2279 | 2/18866 | 0.2270118 | 0.5338711 | 0.4830655 | 1 | KANK1   |

|                    |            |                                                                  |        |         |           |           |           |   |       |
|--------------------|------------|------------------------------------------------------------------|--------|---------|-----------|-----------|-----------|---|-------|
| Biological Process | GO:2000422 | regulation of eosinophil chemotaxis                              | 1/2279 | 2/18866 | 0.2270118 | 0.5338711 | 0.4830655 | 1 | DAPK2 |
| Biological Process | GO:2000424 | positive regulation of eosinophil chemotaxis                     | 1/2279 | 2/18866 | 0.2270118 | 0.5338711 | 0.4830655 | 1 | DAPK2 |
| Biological Process | GO:2000458 | regulation of astrocyte chemotaxis                               | 1/2279 | 2/18866 | 0.2270118 | 0.5338711 | 0.4830655 | 1 | CCR2  |
| Biological Process | GO:2000470 | positive regulation of peroxidase activity                       | 1/2279 | 2/18866 | 0.2270118 | 0.5338711 | 0.4830655 | 1 | SIRT3 |
| Biological Process | GO:2000567 | regulation of memory T cell activation                           | 1/2279 | 2/18866 | 0.2270118 | 0.5338711 | 0.4830655 | 1 | CYRIB |
| Biological Process | GO:2000568 | positive regulation of memory T cell activation                  | 1/2279 | 2/18866 | 0.2270118 | 0.5338711 | 0.4830655 | 1 | CYRIB |
| Biological Process | GO:2000592 | regulation of metanephric DCT cell differentiation               | 1/2279 | 2/18866 | 0.2270118 | 0.5338711 | 0.4830655 | 1 | PAX2  |
| Biological Process | GO:2000594 | positive regulation of metanephric DCT cell differentiation      | 1/2279 | 2/18866 | 0.2270118 | 0.5338711 | 0.4830655 | 1 | PAX2  |
| Biological Process | GO:2000642 | negative regulation of early endosome to late endosome transport | 1/2279 | 2/18866 | 0.2270118 | 0.5338711 | 0.4830655 | 1 | SNX3  |



|                    |            |                                                                                        |         |           |           |           |           |    |                                                                                                                                                                                                         |       |
|--------------------|------------|----------------------------------------------------------------------------------------|---------|-----------|-----------|-----------|-----------|----|---------------------------------------------------------------------------------------------------------------------------------------------------------------------------------------------------------|-------|
| Biological Process | GO:2000707 | positive regulation of dense core granule biogenesis                                   | 1/2279  | 2/18866   | 0.2270118 | 0.5338711 | 0.4830655 | 1  |                                                                                                                                                                                                         | PRKCA |
| Biological Process | GO:2000742 | regulation of anterior head development                                                | 1/2279  | 2/18866   | 0.2270118 | 0.5338711 | 0.4830655 | 1  |                                                                                                                                                                                                         | SSBP3 |
| Biological Process | GO:2000744 | positive regulation of anterior head development                                       | 1/2279  | 2/18866   | 0.2270118 | 0.5338711 | 0.4830655 | 1  |                                                                                                                                                                                                         | SSBP3 |
| Biological Process | GO:2000805 | negative regulation of termination of RNA polymerase II transcription, poly(A)-coupled | 1/2279  | 2/18866   | 0.2270118 | 0.5338711 | 0.4830655 | 1  |                                                                                                                                                                                                         | SCAF8 |
| Biological Process | GO:2000828 | regulation of parathyroid hormone secretion                                            | 1/2279  | 2/18866   | 0.2270118 | 0.5338711 | 0.4830655 | 1  |                                                                                                                                                                                                         | FGFR1 |
| Biological Process | GO:2000843 | regulation of testosterone secretion                                                   | 1/2279  | 2/18866   | 0.2270118 | 0.5338711 | 0.4830655 | 1  |                                                                                                                                                                                                         | MYB   |
| Biological Process | GO:2000845 | positive regulation of testosterone secretion                                          | 1/2279  | 2/18866   | 0.2270118 | 0.5338711 | 0.4830655 | 1  |                                                                                                                                                                                                         | MYB   |
| Biological Process | GO:2001311 | lysobisphosphatidic acid metabolic process                                             | 1/2279  | 2/18866   | 0.2270118 | 0.5338711 | 0.4830655 | 1  |                                                                                                                                                                                                         | ACP6  |
| Biological Process | GO:0051259 | protein complex oligomerization                                                        | 32/2279 | 231/18866 | 0.2289968 | 0.5380409 | 0.4868385 | 32 | TRPM2/NLRC4/EHD1/BLM/ACOT13/SLC1A5/KCTD7/TRPM6/HSCB/NACC2/LRRC8C/CRTC3/SLC1A2/ACACB/RNF213/ZDHHC1/NOL3/UPB1/KCTD2/KCTD15/TRPM3/ACACA/TP53BP1/DN<br>M1L/IKZF4/MAT1A/ATL1/KCTD1/ALDH1A2/TK1/KCTD21/STING1 |       |

|                    |            |                                                             |         |           |           |           |           |    |                                                                                                                                                                                   |
|--------------------|------------|-------------------------------------------------------------|---------|-----------|-----------|-----------|-----------|----|-----------------------------------------------------------------------------------------------------------------------------------------------------------------------------------|
| Biological Process | GO:0006497 | protein lipidation                                          | 14/2279 | 93/18866  | 0.2290114 | 0.5380409 | 0.4868385 | 14 | ZDHHC18/PIGL/ZDHHC14/PIGU/GLPD1/WIPI2/PIGN/ZDHHC2/ZDHHC7/ABCA1/ZDHHC17/ZDHHC1/PIGQ/SVIP                                                                                           |
| Biological Process | GO:1903035 | negative regulation of response to wounding                 | 14/2279 | 93/18866  | 0.2290114 | 0.5380409 | 0.4868385 | 14 | PLAU/CD9/SMAD3/TNF/UBASH3B/SERPINB2/THBS1/F12/KREMEN1/PDGFB/CPB2/ADTRP/CERS2/INPP5F                                                                                               |
| Biological Process | GO:2000117 | negative regulation of cysteine-type endopeptidase activity | 14/2279 | 93/18866  | 0.2290114 | 0.5380409 | 0.4868385 | 14 | RPS6KA1/ARRB1/TNF/MICAL1/THBS1/PAX2/AQP1/POR/DNAJB6/NOL3/ARRB2/PIH1D1/LTF/PCID2                                                                                                   |
| Biological Process | GO:0010389 | regulation of G2/M transition of mitotic cell cycle         | 28/2279 | 200/18866 | 0.2292285 | 0.5381517 | 0.4869387 | 28 | TRIM39/BLM/BRD4/DCTN1/CSNK1D/FOXN3/NDE1/HUS1/DYNC1H1/TUBB4B/CEP135/APP/CDC25A/CEP164/DCTN2/CEP78/CSNK1E/PSMF1/PPP2R1A/TUBA4A/TAOK3/SDCCAG8/ZFYV E19/CLSPN/PSMB7/CEP72/NAE1/PSMD13 |
| Biological Process | GO:0030705 | cytoskeleton-dependent intracellular transport              | 28/2279 | 200/18866 | 0.2292285 | 0.5381517 | 0.4869387 | 28 | PRKCZ/CCDC88C/NDE1/TNPO1/KIF13A/SPG7/DYNC1H1/APP/ACTN4/WASL/BICD2/CLUAP1/CNIH2/MYO5A/CCDC88B/HTT/KIF5C/HOOK2/IFT140/KIF1B/TTC21B/MAP1A/KIFAP3/MYO1 C/AP3D1/FBXW11/NDEL1/DTNBP1    |
| Biological Process | GO:1901654 | response to ketone                                          | 28/2279 | 200/18866 | 0.2292285 | 0.5381517 | 0.4869387 | 28 | CALR/PPARG/ADCY2/ABCC2/LARP1/SMYD3/THBS1/FECH/P2RY6/SPHK2/TGFB1/FDX1/AQP1/NCOA1/KIF1B/GNG2/ACACA/SLIT3/PRKCE/UBE3A/PCK2/FOXO1/BCL2L1/NCOA2/SREBF1/ RELA/NCOA4/PRKAA1              |
| Biological Process | GO:0030071 | regulation of mitotic metaphase/anaphase transition         | 9/2279  | 56/18866  | 0.2300782 | 0.53948   | 0.4881407 | 9  | MAD1L1/NSMCE2/CUL3/CDC16/NEK6/RB1/ANAPC7/HECW2/PCID2                                                                                                                              |
| Biological Process | GO:0043113 | receptor clustering                                         | 9/2279  | 56/18866  | 0.2300782 | 0.53948   | 0.4881407 | 9  | SSH1/GSN/ITGB1BP1/COLQ/ZDHHC2/SYNGAP1/NRXN1/NRXN2/ITGB2                                                                                                                           |
| Biological Process | GO:0060563 | neuroepithelial cell differentiation                        | 9/2279  | 56/18866  | 0.2300782 | 0.53948   | 0.4881407 | 9  | DLL1/RBPJ/WNT11/FGFR1/NOTCH1/TMC1/CEBPB/FAM20C/NODAL                                                                                                                              |

|                    |            |                                                                         |         |           |           |           |           |    |                                                                                                                                                                                                                                                                                                                            |
|--------------------|------------|-------------------------------------------------------------------------|---------|-----------|-----------|-----------|-----------|----|----------------------------------------------------------------------------------------------------------------------------------------------------------------------------------------------------------------------------------------------------------------------------------------------------------------------------|
| Biological Process | GO:0090183 | regulation of kidney development                                        | 9/2279  | 56/18866  | 0.2300782 | 0.53948   | 0.4881407 | 9  | TACSTD2/PAX2/PDGFD/WWTR1/IL6R/PDGFB/PDGFRB/LIF/HOXB7                                                                                                                                                                                                                                                                       |
| Biological Process | GO:1905515 | non-motile cilium assembly                                              | 9/2279  | 56/18866  | 0.2300782 | 0.53948   | 0.4881407 | 9  | DCTN1/CSNK1D/DNM2/DISC1/CEP135/POC1A/IFT140/RPGRI1/SEPTIN9                                                                                                                                                                                                                                                                 |
| Biological Process | GO:0030324 | lung development                                                        | 25/2279 | 177/18866 | 0.2307036 | 0.540813  | 0.4893468 | 25 | CTSZ/CREB1/CRISPLD2/CHI3L1/TNS3/TNF/LOXL3/SFTPD/TGFBR2/CTSH/RBPJ/WNT1/FGFR1/RDH10/SP3/GRHL2/YWHAZ/NOTCH1/EPAS1/PDGFRB/SREBF1/ALDH1A2/NODAL/LIF/SLC23A1                                                                                                                                                                     |
| Biological Process | GO:0032434 | regulation of proteasomal ubiquitin-dependent protein catabolic process | 19/2279 | 131/18866 | 0.2308336 | 0.5409841 | 0.4895017 | 19 | TRIM39/RNF144A/FZR1/RNF19A/CSNK1D/CBFA2T3/CLU/SMAD7/CLEC16A/CSNK1E/NFE2L2/RNF144B/MAP1A/GNA12/RNF14/TRIB1/BAG5/SVIP/PRKN                                                                                                                                                                                                   |
| Biological Process | GO:0070482 | response to oxygen levels                                               | 53/2279 | 396/18866 | 0.2309533 | 0.5411312 | 0.4896347 | 53 | P4HB/ENO1/PLAU/PPARG/ITPR2/MIR140/TM9SF4/CREB1/MYB/NDRG1/SMAD3/SLC8A1/HIPK2/CBFA2T3/ITPR1/SLC11A2/TGFBR2/THBS1/RBPJ/ACTN4/LIMD1/AQP1/NF1/HK2/ALAS1/AGTRAP/PSMF1/CREBBP/NOL3/CAT/ETS1/NFE2L2/FIS1/PKM/BCL2/PSMB7/NOTCH1/AQP3/DNM1L/EPAS1/PRKCE/NPPC/PDGFRB/SLC2A1/FOXO1/ANKRD1/SLC29A1/BACH1/HSD11B2/ERCC2/PSMD13/MB/PRKAA1 |
| Biological Process | GO:0006354 | DNA-templated transcription, elongation                                 | 17/2279 | 116/18866 | 0.233097  | 0.5434794 | 0.4917594 | 17 | BRD4/TAF1C/CTDP1/WDR43/SETD2/POLR2F/RECQL5/ELL2/ENY2/MLLT1/CCNH/SCAF8/TAF1D/KAT7/ERCC2/CDK13/PCID2                                                                                                                                                                                                                         |
| Biological Process | GO:0046579 | positive regulation of Ras protein signal transduction                  | 11/2279 | 71/18866  | 0.2341298 | 0.5434794 | 0.4917594 | 11 | AKAP13/ITPKB/ARRB1/LRRC59/SYNPO2L/NTRK1/NOTCH1/F2R/GPR4/PDGFRB/PRAG1                                                                                                                                                                                                                                                       |
| Biological Process | GO:0001771 | immunological synapse formation                                         | 3/2279  | 14/18866  | 0.234562  | 0.5434794 | 0.4917594 | 3  | NCK2/DOCK8/DOCK2                                                                                                                                                                                                                                                                                                           |
| Biological Process | GO:0001921 | positive regulation of receptor recycling                               | 3/2279  | 14/18866  | 0.234562  | 0.5434794 | 0.4917594 | 3  | ARAP1/EPS15/INPP5F                                                                                                                                                                                                                                                                                                         |

|                    |            |                                                                                      |        |          |          |           |           |   |                      |
|--------------------|------------|--------------------------------------------------------------------------------------|--------|----------|----------|-----------|-----------|---|----------------------|
| Biological Process | GO:0003188 | heart valve formation                                                                | 3/2279 | 14/18866 | 0.234562 | 0.5434794 | 0.4917594 | 3 | ZFPM1/GJA5/NOTCH1    |
| Biological Process | GO:0003214 | cardiac left ventricle morphogenesis                                                 | 3/2279 | 14/18866 | 0.234562 | 0.5434794 | 0.4917594 | 3 | TGFBR2/RBPJ/NOTCH1   |
| Biological Process | GO:0010872 | regulation of cholesterol esterification                                             | 3/2279 | 14/18866 | 0.234562 | 0.5434794 | 0.4917594 | 3 | ABCG1/MIR27A/AGTR1   |
| Biological Process | GO:0010889 | regulation of sequestering of triglyceride                                           | 3/2279 | 14/18866 | 0.234562 | 0.5434794 | 0.4917594 | 3 | PNPLA2/PPARG/ABHD5   |
| Biological Process | GO:0030948 | negative regulation of vascular endothelial growth factor receptor signaling pathway | 3/2279 | 14/18866 | 0.234562 | 0.5434794 | 0.4917594 | 3 | EPN2/NEDD4/HHEX      |
| Biological Process | GO:0033169 | histone H3-K9 demethylation                                                          | 3/2279 | 14/18866 | 0.234562 | 0.5434794 | 0.4917594 | 3 | KDM4B/KDM4C/KDM7A    |
| Biological Process | GO:0034392 | negative regulation of smooth muscle cell apoptotic process                          | 3/2279 | 14/18866 | 0.234562 | 0.5434794 | 0.4917594 | 3 | ARRB2/MIR138-2/DNMT1 |
| Biological Process | GO:0042659 | regulation of cell fate specification                                                | 3/2279 | 14/18866 | 0.234562 | 0.5434794 | 0.4917594 | 3 | WNT11/FGFR1/LMO4     |
| Biological Process | GO:0044154 | histone H3-K14 acetylation                                                           | 3/2279 | 14/18866 | 0.234562 | 0.5434794 | 0.4917594 | 3 | BRD1/KAT7/ING5       |

|                    |            |                                                                |        |          |          |           |           |   |                      |
|--------------------|------------|----------------------------------------------------------------|--------|----------|----------|-----------|-----------|---|----------------------|
| Biological Process | GO:0045059 | positive thymic T cell selection                               | 3/2279 | 14/18866 | 0.234562 | 0.5434794 | 0.4917594 | 3 | ITPKB/PTPRC/DOCK2    |
| Biological Process | GO:0045605 | negative regulation of epidermal cell differentiation          | 3/2279 | 14/18866 | 0.234562 | 0.5434794 | 0.4917594 | 3 | DLL1/GRHL2/NOTCH1    |
| Biological Process | GO:0046462 | monoacylglycerol metabolic process                             | 3/2279 | 14/18866 | 0.234562 | 0.5434794 | 0.4917594 | 3 | MGLL/ABHD16A/ABHD16B |
| Biological Process | GO:0048681 | negative regulation of axon regeneration                       | 3/2279 | 14/18866 | 0.234562 | 0.5434794 | 0.4917594 | 3 | KREMEN1/CERS2/INPP5F |
| Biological Process | GO:0051645 | Golgi localization                                             | 3/2279 | 14/18866 | 0.234562 | 0.5434794 | 0.4917594 | 3 | UVRAG/YWHAZ/RIPOR1   |
| Biological Process | GO:0051775 | response to redox state                                        | 3/2279 | 14/18866 | 0.234562 | 0.5434794 | 0.4917594 | 3 | ARHGDI8/ARNTL/GLRX2  |
| Biological Process | GO:0051917 | regulation of fibrinolysis                                     | 3/2279 | 14/18866 | 0.234562 | 0.5434794 | 0.4917594 | 3 | THBS1/F12/CPB2       |
| Biological Process | GO:0052803 | imidazole-containing compound metabolic process                | 3/2279 | 14/18866 | 0.234562 | 0.5434794 | 0.4917594 | 3 | HAL/MTHFD1/HNMT      |
| Biological Process | GO:0060211 | regulation of nuclear-transcribed mRNA poly(A) tail shortening | 3/2279 | 14/18866 | 0.234562 | 0.5434794 | 0.4917594 | 3 | TNRC6B/AGO2/CPEB3    |

|                    |            |                                                                                         |        |          |          |           |           |   |                      |
|--------------------|------------|-----------------------------------------------------------------------------------------|--------|----------|----------|-----------|-----------|---|----------------------|
| Biological Process | GO:0070431 | nucleotide-binding oligomerization domain containing 2 signaling pathway                | 3/2279 | 14/18866 | 0.234562 | 0.5434794 | 0.4917594 | 3 | TNFAIP3/NOD2/RELA    |
| Biological Process | GO:0070672 | response to interleukin-15                                                              | 3/2279 | 14/18866 | 0.234562 | 0.5434794 | 0.4917594 | 3 | STAT5A/JAK1/PLCB1    |
| Biological Process | GO:0070986 | left/right axis specification                                                           | 3/2279 | 14/18866 | 0.234562 | 0.5434794 | 0.4917594 | 3 | PKD1L1/DLL1/NOTCH1   |
| Biological Process | GO:0071361 | cellular response to ethanol                                                            | 3/2279 | 14/18866 | 0.234562 | 0.5434794 | 0.4917594 | 3 | ITPR2/PRKCE/PRKAA1   |
| Biological Process | GO:0072425 | signal transduction involved in G2 DNA damage checkpoint                                | 3/2279 | 14/18866 | 0.234562 | 0.5434794 | 0.4917594 | 3 | FZR1/ABRAXAS1/BABAM2 |
| Biological Process | GO:0090161 | Golgi ribbon formation                                                                  | 3/2279 | 14/18866 | 0.234562 | 0.5434794 | 0.4917594 | 3 | VTI1A/MYO18A/NUMA1   |
| Biological Process | GO:0098814 | spontaneous synaptic transmission                                                       | 3/2279 | 14/18866 | 0.234562 | 0.5434794 | 0.4917594 | 3 | APP/RPH3A/PRKN       |
| Biological Process | GO:0106070 | regulation of adenylate cyclase-activating G protein-coupled receptor signaling pathway | 3/2279 | 14/18866 | 0.234562 | 0.5434794 | 0.4917594 | 3 | PRKCA/GNAI2/MRAP     |
| Biological Process | GO:1901626 | regulation of postsynaptic membrane organization                                        | 3/2279 | 14/18866 | 0.234562 | 0.5434794 | 0.4917594 | 3 | SSH1/ZMYND8/ZDHHC2   |

|                    |            |                                                                                               |        |          |          |           |           |   |                        |
|--------------------|------------|-----------------------------------------------------------------------------------------------|--------|----------|----------|-----------|-----------|---|------------------------|
| Biological Process | GO:1901722 | regulation of cell proliferation involved in kidney development                               | 3/2279 | 14/18866 | 0.234562 | 0.5434794 | 0.4917594 | 3 | PDGFD/IL6R/PDGFB       |
| Biological Process | GO:1901836 | regulation of transcription of nucleolar large rRNA by RNA polymerase I                       | 3/2279 | 14/18866 | 0.234562 | 0.5434794 | 0.4917594 | 3 | PIH1D1/MARS1/MACROH2A2 |
| Biological Process | GO:1901841 | regulation of high voltage-gated calcium channel activity                                     | 3/2279 | 14/18866 | 0.234562 | 0.5434794 | 0.4917594 | 3 | NOS1AP/DYSF/FGF14      |
| Biological Process | GO:1902430 | negative regulation of amyloid-beta formation                                                 | 3/2279 | 14/18866 | 0.234562 | 0.5434794 | 0.4917594 | 3 | SORL1/BIN1/CLU         |
| Biological Process | GO:1903726 | negative regulation of phospholipid metabolic process                                         | 3/2279 | 14/18866 | 0.234562 | 0.5434794 | 0.4917594 | 3 | LPCAT1/PDGFB/MIR138-2  |
| Biological Process | GO:1903799 | negative regulation of production of miRNAs involved in gene silencing by miRNA               | 3/2279 | 14/18866 | 0.234562 | 0.5434794 | 0.4917594 | 3 | NCOR2/TNF/TGFB1        |
| Biological Process | GO:1904293 | negative regulation of ERAD pathway                                                           | 3/2279 | 14/18866 | 0.234562 | 0.5434794 | 0.4917594 | 3 | UBAC2/DERL2/SVIP       |
| Biological Process | GO:1904925 | positive regulation of autophagy of mitochondrion in response to mitochondrial depolarization | 3/2279 | 14/18866 | 0.234562 | 0.5434794 | 0.4917594 | 3 | SMURF1/HK2/PRKN        |
| Biological Process | GO:2000232 | regulation of rRNA processing                                                                 | 3/2279 | 14/18866 | 0.234562 | 0.5434794 | 0.4917594 | 3 | WDR43/USP36/RIOK1      |

|                    |            |                                                          |        |          |           |           |           |   |                                                          |
|--------------------|------------|----------------------------------------------------------|--------|----------|-----------|-----------|-----------|---|----------------------------------------------------------|
| Biological Process | GO:0002067 | glandular epithelial cell differentiation                | 8/2279 | 49/18866 | 0.2348156 | 0.5434794 | 0.4917594 | 8 | RXRA/RHEB/RFX3/DLL1/RARA/RARG/ARNTL/NOTCH1               |
| Biological Process | GO:0006654 | phosphatidic acid biosynthetic process                   | 8/2279 | 49/18866 | 0.2348156 | 0.5434794 | 0.4917594 | 8 | LPCAT1/PLD1/ACP6/DGKQ/DGKA/DGKD/ABHD5/AGPAT5             |
| Biological Process | GO:0009395 | phospholipid catabolic process                           | 8/2279 | 49/18866 | 0.2348156 | 0.5434794 | 0.4917594 | 8 | PLA2G15/PLBD2/LIPC/ABHD16A/SMPDL3B/ABHD16B/PLCG1/INPP5F  |
| Biological Process | GO:0015695 | organic cation transport                                 | 8/2279 | 49/18866 | 0.2348156 | 0.5434794 | 0.4917594 | 8 | SLC44A4/RALBP1/SEC14L1/ITGB3/SLC22A5/P2RX1/SLC7A8/PDZK1  |
| Biological Process | GO:0018198 | peptidyl-cysteine modification                           | 8/2279 | 49/18866 | 0.2348156 | 0.5434794 | 0.4917594 | 8 | S100A8/ZDHHC18/ZDHHC14/ZDHHC2/NOS1AP/ZDHHC7/ZDHHC1/SNTA1 |
| Biological Process | GO:0035196 | production of miRNAs involved in gene silencing by miRNA | 8/2279 | 49/18866 | 0.2348156 | 0.5434794 | 0.4917594 | 8 | NCOR2/ZC3H7A/SMAD3/TNF/AGO1/RIPK1/AGO2/TGFB1             |
| Biological Process | GO:0045058 | T cell selection                                         | 8/2279 | 49/18866 | 0.2348156 | 0.5434794 | 0.4917594 | 8 | ZFPM1/ITPKB/LOXL3/LY9/PTPRC/BCL2/CYLD/DOCK2              |
| Biological Process | GO:0048641 | regulation of skeletal muscle tissue development         | 8/2279 | 49/18866 | 0.2348156 | 0.5434794 | 0.4917594 | 8 | HDAC4/DLL1/TGFB1/ARNTL/BCL2/MEF2C/FLOT1/PRKAA1           |
| Biological Process | GO:0061647 | histone H3-K9 modification                               | 8/2279 | 49/18866 | 0.2348156 | 0.5434794 | 0.4917594 | 8 | MYB/EHMT2/SPHK2/KDM4C/PRDM16/DNMT1/PIH1D1/MECOM          |



|                    |            |                                                     |         |           |           |           |           |    |                                                                                                                                                                                                                                                |
|--------------------|------------|-----------------------------------------------------|---------|-----------|-----------|-----------|-----------|----|------------------------------------------------------------------------------------------------------------------------------------------------------------------------------------------------------------------------------------------------|
| Biological Process | GO:0086009 | membrane repolarization                             | 8/2279  | 49/18866  | 0.2348156 | 0.5434794 | 0.4917594 | 8  | KCNE1/CASQ2/GJA5/NOS1AP/WDR1/SNTA1/KCNQ1/ANK2                                                                                                                                                                                                  |
| Biological Process | GO:0019935 | cyclic-nucleotide-mediated signaling                | 31/2279 | 224/18866 | 0.2350229 | 0.5438266 | 0.4920737 | 31 | KSR1/PDE4D/MGRN1/ADCY2/AKAP13/PRKAR1B/ADCY9/PRKCA/THBS1/GNAI2/MRAP/CRTC3/RAPGEF2/DGKQ/AQP1/DEFB1/GIPR/ABCA1/CNR2/PDE9A/ADCY4/S1PR2/GNG2/LPAR2/NPPC/S1PR4/GPR4/PDE3B/IRAG1/ADGRG3/ADGRE3                                                        |
| Biological Process | GO:0009791 | post-embryonic development                          | 13/2279 | 86/18866  | 0.2352595 | 0.5442416 | 0.4924491 | 13 | ARID5B/CRB1/PLAGL2/CHST11/ITPR1/AGO2/MORC3/BCL2/STK36/NPPC/ERCC1/ERCC2/ETNK2                                                                                                                                                                   |
| Biological Process | GO:0060047 | heart contraction                                   | 39/2279 | 287/18866 | 0.2386561 | 0.5516087 | 0.4991152 | 39 | HDAC4/PDE4D/KCNE1/TTN/CASQ2/ITPR2/FXYD2/MAP2K6/CACNA1C/CACNA2D4/FXYD1/SLC8A1/GJA5/ATP2B2/ITPR1/JUP/BIN1/NOS1AP/SMAD7/KCNIP1/SCN1A/KCNK6/CHRM2/ATP2A3/CELF2/SNTA1/KCNQ1/GSTO1/GNAO1/DNM1L/EPAS1/NPPC/CACNA1B/ANK2/ASPH/SREBF1/CASQ1/SPTBN4/GRK2 |
| Biological Process | GO:0001709 | cell fate determination                             | 7/2279  | 42/18866  | 0.2391272 | 0.5516087 | 0.4991152 | 7  | DLL1/IFRD1/PAX2/DSCAML1/MEF2C/NOTCH4/NTF4                                                                                                                                                                                                      |
| Biological Process | GO:0002707 | negative regulation of lymphocyte mediated immunity | 7/2279  | 42/18866  | 0.2391272 | 0.5516087 | 0.4991152 | 7  | DUSP22/HLA-F/PTPN6/SMAD7/PTPRC/ARRB2/CD96                                                                                                                                                                                                      |
| Biological Process | GO:0006509 | membrane protein ectodomain proteolysis             | 7/2279  | 42/18866  | 0.2391272 | 0.5516087 | 0.4991152 | 7  | PRTN3/TIMP2/IL10/TNFRSF1B/GLPD1/TNF/MYH9                                                                                                                                                                                                       |
| Biological Process | GO:0034383 | low-density lipoprotein particle clearance          | 7/2279  | 42/18866  | 0.2391272 | 0.5516087 | 0.4991152 | 7  | EHD1/AP2A1/MIR199A1/MIR27A/CSK/NPC1/MIR199A2                                                                                                                                                                                                   |
| Biological Process | GO:0048246 | macrophage chemotaxis                               | 7/2279  | 42/18866  | 0.2391272 | 0.5516087 | 0.4991152 | 7  | AZU1/C3AR1/CCL5/CSF1R/SFTPD/THBS1/CXCL17                                                                                                                                                                                                       |

|                    |            |                                              |         |           |           |           |           |    |                                                                                                                                                                                                                                                                                                       |
|--------------------|------------|----------------------------------------------|---------|-----------|-----------|-----------|-----------|----|-------------------------------------------------------------------------------------------------------------------------------------------------------------------------------------------------------------------------------------------------------------------------------------------------------|
| Biological Process | GO:0071470 | cellular response to osmotic stress          | 7/2279  | 42/18866  | 0.2391272 | 0.5516087 | 0.4991152 | 7  | MYLK/LRRC8C/AQP1/CAB39/ARHGFE2/SLC2A1/DYSF                                                                                                                                                                                                                                                            |
| Biological Process | GO:0043543 | protein acylation                            | 34/2279 | 248/18866 | 0.2397141 | 0.5516087 | 0.4991152 | 34 | ZDHHC18/SRCAP/BRCA2/ZDHHC14/KANSL1/ARRB1/BRD1/CDYL/EPC1/ZDHHC2/OGDH/RPS6KA4/TAF10/ZDHHC7/KANSL2/SPHK2/CTBP1/POR/NCOA1/ZDHHC17/ZDHHC1/CREBBP/RSF1/ARNTL/PER1/PIH1D1/NAA16/FOXO1/RUVBL1/KAT7/ING5/LIF/PAXIP1/PRKAA1                                                                                     |
| Biological Process | GO:0050768 | negative regulation of neurogenesis          | 40/2279 | 295/18866 | 0.239715  | 0.5516087 | 0.4991152 | 40 | SEMA6B/CTS2/GFI1/SORL1/CALR/KANK1/LSM1/YWHAH/SKI/TNF/BCL11A/SEMA4A/RTN4/PMP22/SEMA4B/DLL1/APP/MIB1/IFRD1/ASAP1/SYNGAP1/KREMEN1/SEMA4D/RAPGEF2/NF1/ITM2C/MEIS1/DNM3/NOTCH1/ZHX2/CDKL3/UBE3A/ARHGFE2/CERS2/INPP5F/BAG5/RAP1GAP2/HES3/PRAG1/SPART                                                        |
| Biological Process | GO:0018958 | phenol-containing compound metabolic process | 16/2279 | 109/18866 | 0.2397186 | 0.5516087 | 0.4991152 | 16 | ZEB2/TG/COMT/DDC/FAH/CDH3/RAPGEF2/SULT1A2/MYO5A/CPQ/CTSB/ITGB2/BCL2/EPAS1/CRYM/PRKN                                                                                                                                                                                                                   |
| Biological Process | GO:0051926 | negative regulation of calcium ion transport | 10/2279 | 64/18866  | 0.2401269 | 0.5516087 | 0.4991152 | 10 | TRIM27/THADA/CASQ2/TLR9/BIN1/BCL2/GSTO1/DYSF/CD33/CBARP                                                                                                                                                                                                                                               |
| Biological Process | GO:0070265 | necrotic cell death                          | 10/2279 | 64/18866  | 0.2401269 | 0.5516087 | 0.4991152 | 10 | TNF/TRAF2/MIR101-2/RIPK1/RIPK3/DNM1L/ARHGFE2/CYLD/FADD/PEL1                                                                                                                                                                                                                                           |
| Biological Process | GO:0002449 | lymphocyte mediated immunity                 | 49/2279 | 366/18866 | 0.2405149 | 0.5516087 | 0.4991152 | 49 | PRKCZ/FUT7/IL10/LYST/CD55/INPP5D/SLC11A1/TNFRSF1B/NLRP3/IL1R1/CCR2/PIK3R6/TNF/TRAF2/DUSP22/IGHV6-1/SLAMF7/CTSH/TUBB4B/RAB27A/CD226/HLA-F/PTPN6/CLU/SMAD7/UNG/TGFB1/NCR1/RIPK3/C1S/PTPRC/BCL10/ARRB2/IL18RAP/POU2F2/TP53BP1/IL18R1/ERCC1/TNFSF13/C1QB/CADM1/CD96/BCL3/FADD/PAXIP1/C1RL/CYRIB/NSD2/SLA2 |
| Biological Process | GO:1903522 | regulation of blood circulation              | 41/2279 | 303/18866 | 0.2407093 | 0.5516087 | 0.4991152 | 41 | HDAC4/PDE4D/KCNE1/CASQ2/ITPR2/FXYD2/CACNA1C/CACNA2D4/FXYD1/SLC8A1/GJA5/ATP2B2/ITPR1/JUP/BIN1/NOS1AP/SMAD7/KCNIP1/KCNK6/HRH1/GHRL/CHRM2/ATP2A3/CELLF2/SNTA1/KCNQ1/PER2/GSTO1/GNAO1/P2RX1/EPAS1/F2R/NPPC/AGTR1/CACNA1B/ANK2/ASPH/SREBF1/CASQ1/SPTBN4/GRK2                                               |
| Biological Process | GO:0008016 | regulation of heart contraction              | 35/2279 | 256/18866 | 0.241076  | 0.5516087 | 0.4991152 | 35 | HDAC4/PDE4D/KCNE1/CASQ2/ITPR2/FXYD2/CACNA1C/CACNA2D4/FXYD1/SLC8A1/GJA5/ATP2B2/ITPR1/JUP/BIN1/NOS1AP/SMAD7/KCNIP1/KCNK6/CHRM2/ATP2A3/CELLF2/SNTA1/KCNQ1/GSTO1/GNAO1/EPAS1/NPPC/CACNA1B/ANK2/ASPH/SREBF1/CASQ1/SPTBN4/GRK2                                                                              |

|                    |            |                                                 |         |           |           |           |           |    |                                                                                                                                                                                                                         |
|--------------------|------------|-------------------------------------------------|---------|-----------|-----------|-----------|-----------|----|-------------------------------------------------------------------------------------------------------------------------------------------------------------------------------------------------------------------------|
| Biological Process | GO:1904035 | regulation of epithelial cell apoptotic process | 14/2279 | 94/18866  | 0.2413347 | 0.5516087 | 0.4991152 | 14 | GSN/ANGPT1/TNF/TNFAIP3/MIR101-2/THBS1/MIR24-2/TCF7L2/PRKCI/NFE2L2/ARRB2/SORT1/ANO6/PLCG1                                                                                                                                |
| Biological Process | GO:0021675 | nerve development                               | 12/2279 | 79/18866  | 0.2417469 | 0.5516087 | 0.4991152 | 12 | NRP2/PHOX2A/DRGX/ATP8B1/ILK/LRIG1/PAX2/NTRK1/SLC1A3/NPTX1/HES3/NTF4                                                                                                                                                     |
| Biological Process | GO:0031016 | pancreas development                            | 12/2279 | 79/18866  | 0.2417469 | 0.5516087 | 0.4991152 | 12 | RHEB/RFX3/DLL1/TCF7L2/HNF1A/GIPR/IL6R/MEIS2/ARNTL/FOXO1/ALDH1A2/NR5A2                                                                                                                                                   |
| Biological Process | GO:0070373 | negative regulation of ERK1 and ERK2 cascade    | 12/2279 | 79/18866  | 0.2417469 | 0.5516087 | 0.4991152 | 12 | SPRED2/ITGB1BP1/ARRB1/PHB/TNIP1/PTPRC/CSK/DUSP3/EZR/LIF/NDRG2/SIRT3                                                                                                                                                     |
| Biological Process | GO:0120192 | tight junction assembly                         | 12/2279 | 79/18866  | 0.2417469 | 0.5516087 | 0.4991152 | 12 | TBCD/RUNX1/TNF/ACTN4/WNT11/PRKCH/ACTG1/GRHL2/PRKCI/MPP7/MYO1C/NPHP4                                                                                                                                                     |
| Biological Process | GO:0051147 | regulation of muscle cell differentiation       | 26/2279 | 186/18866 | 0.2418637 | 0.5516087 | 0.4991152 | 26 | HDAC4/EHD1/CTDP1/MIR140/MIR145/AKAP13/MAML1/MIR199A1/NFATC2/NFATC1/DLL1/RBPJ/TGFB1/PDGFB/ENG/ARRB2/ANKRD2/BCL2/TCF3/MIR199A2/NOTCH1/DNMT1/MEF2C/FLOT1/SCGB3A1/CEACAM5                                                   |
| Biological Process | GO:0048863 | stem cell differentiation                       | 36/2279 | 264/18866 | 0.2423494 | 0.5516087 | 0.4991152 | 36 | SEMA6B/TACSTD2/NRP2/MYB/RUNX1/SETD2/ANXA6/ZEB2/LBH/SEMA4A/SEMA4B/RBPJ/TCF12/PAX2/SEMA4D/RDH10/KDM4C/PTPRC/RUNX2/SETD1A/PSMF1/NFE2L2/PUS7/ESRRB/TCF3/PSMB7/NOTCH1/CORO1C/MEF2C/TEAD2/ALDH1A2/ERCC2/NTF4/LIF/PSMD13/CDK13 |
| Biological Process | GO:0006369 | termination of RNA polymerase II transcription  | 6/2279  | 35/18866  | 0.2426224 | 0.5516087 | 0.4991152 | 6  | FIP1L1/CPSF3/SNRPD3/PABPN1/SCAF8/CPSF4                                                                                                                                                                                  |
| Biological Process | GO:0009112 | nucleobase metabolic process                    | 6/2279  | 35/18866  | 0.2426224 | 0.5516087 | 0.4991152 | 6  | CDA/DPYS/GMPR2/DHODH/AOX1/ACP3                                                                                                                                                                                          |

|                    |            |                                                                             |        |          |           |           |           |   |                                       |
|--------------------|------------|-----------------------------------------------------------------------------|--------|----------|-----------|-----------|-----------|---|---------------------------------------|
| Biological Process | GO:0009262 | deoxyribonucleotide metabolic process                                       | 6/2279 | 35/18866 | 0.2426224 | 0.5516087 | 0.4991152 | 6 | RRM2B/UNG/NTHL1/GUK1/AK5/DCTD         |
| Biological Process | GO:0014904 | myotube cell development                                                    | 6/2279 | 35/18866 | 0.2426224 | 0.5516087 | 0.4991152 | 6 | HDAC4/SKI/NFATC2/SMYD3/BCL2/MYORG     |
| Biological Process | GO:0030262 | apoptotic nuclear changes                                                   | 6/2279 | 35/18866 | 0.2426224 | 0.5516087 | 0.4991152 | 6 | CECR2/PAM16/DEDD2/DFFB/DNASE1L3/BLCAP |
| Biological Process | GO:0030947 | regulation of vascular endothelial growth factor receptor signaling pathway | 6/2279 | 35/18866 | 0.2426224 | 0.5516087 | 0.4991152 | 6 | GRB10/EPN2/PRKCB/ITGB3/NEDD4/HHEX     |
| Biological Process | GO:0031297 | replication fork processing                                                 | 6/2279 | 35/18866 | 0.2426224 | 0.5516087 | 0.4991152 | 6 | BLM/BRCA2/RTEL1/EME1/SMARCAL1/FBH1    |
| Biological Process | GO:0032228 | regulation of synaptic transmission, GABAergic                              | 6/2279 | 35/18866 | 0.2426224 | 0.5516087 | 0.4991152 | 6 | SYN3/NISCH/NF1/CNR2/PLCL1/PRKCE       |
| Biological Process | GO:0032633 | interleukin-4 production                                                    | 6/2279 | 35/18866 | 0.2426224 | 0.5516087 | 0.4991152 | 6 | PRKCZ/ZFPM1/NLRP3/RARA/SLC7A5/CEBPB   |
| Biological Process | GO:0032735 | positive regulation of interleukin-12 production                            | 6/2279 | 35/18866 | 0.2426224 | 0.5516087 | 0.4991152 | 6 | IRF8/IRF5/IL16/TLR9/SCIMP/PLCB1       |
| Biological Process | GO:0032801 | receptor catabolic process                                                  | 6/2279 | 35/18866 | 0.2426224 | 0.5516087 | 0.4991152 | 6 | AP2A1/UVRAG/TGFB1/SMURF1/NEDD4/MVB12A |

|                    |            |                                                                                                              |        |          |           |           |           |   |                                      |
|--------------------|------------|--------------------------------------------------------------------------------------------------------------|--------|----------|-----------|-----------|-----------|---|--------------------------------------|
| Biological Process | GO:0042462 | eye photoreceptor cell development                                                                           | 6/2279 | 35/18866 | 0.2426224 | 0.5516087 | 0.4991152 | 6 | CRB1/GNAT2/PRKCI/RPGRIP1/NRL/CABP4   |
| Biological Process | GO:0045066 | regulatory T cell differentiation                                                                            | 6/2279 | 35/18866 | 0.2426224 | 0.5516087 | 0.4991152 | 6 | FUT7/RUNX1/NFATC2/FANCA/LILRB4/VSIR  |
| Biological Process | GO:0048333 | mesodermal cell differentiation                                                                              | 6/2279 | 35/18866 | 0.2426224 | 0.5516087 | 0.4991152 | 6 | MIR145/PAX2/FGFR1/ITGB3/INHBA/NODAL  |
| Biological Process | GO:0065005 | protein-lipid complex assembly                                                                               | 6/2279 | 35/18866 | 0.2426224 | 0.5516087 | 0.4991152 | 6 | P4HB/MFSD2A/PLAGL2/BIN1/NR1H2/ABCA1  |
| Biological Process | GO:0070306 | lens fiber cell differentiation                                                                              | 6/2279 | 35/18866 | 0.2426224 | 0.5516087 | 0.4991152 | 6 | SPRED2/FZR1/SMAD3/ZEB2/WNT5B/TMOD1   |
| Biological Process | GO:0098801 | regulation of renal system process                                                                           | 6/2279 | 35/18866 | 0.2426224 | 0.5516087 | 0.4991152 | 6 | GJA5/COMT/GNAI2/PDGFB/F2R/AGTR1      |
| Biological Process | GO:0110111 | negative regulation of animal organ morphogenesis                                                            | 6/2279 | 35/18866 | 0.2426224 | 0.5516087 | 0.4991152 | 6 | TACSTD2/TNF/PAX2/BCL2/NOTCH1/CPB2    |
| Biological Process | GO:1901020 | negative regulation of calcium ion transmembrane transporter activity                                        | 6/2279 | 35/18866 | 0.2426224 | 0.5516087 | 0.4991152 | 6 | THADA/CASQ2/TLR9/GSTO1/DYSF/CBARP    |
| Biological Process | GO:1901030 | positive regulation of mitochondrial outer membrane permeabilization involved in apoptotic signaling pathway | 6/2279 | 35/18866 | 0.2426224 | 0.5516087 | 0.4991152 | 6 | TFDP1/YWHAH/YWHAZ/BCL2/TP53BP2/YWHAQ |

|                    |            |                                                            |        |          |           |           |           |   |                         |
|--------------------|------------|------------------------------------------------------------|--------|----------|-----------|-----------|-----------|---|-------------------------|
| Biological Process | GO:0002363 | alpha-beta T cell lineage commitment                       | 4/2279 | 21/18866 | 0.2432628 | 0.5516087 | 0.4991152 | 4 | ZFPM1/LOXL3/LY9/BCL2    |
| Biological Process | GO:0010829 | negative regulation of glucose transmembrane transport     | 4/2279 | 21/18866 | 0.2432628 | 0.5516087 | 0.4991152 | 4 | MIR143/TNF/GRB10/PRKCB  |
| Biological Process | GO:0032516 | positive regulation of phosphoprotein phosphatase activity | 4/2279 | 21/18866 | 0.2432628 | 0.5516087 | 0.4991152 | 4 | PTPRC/PDGFRB/CD33/PTPA  |
| Biological Process | GO:0043691 | reverse cholesterol transport                              | 4/2279 | 21/18866 | 0.2432628 | 0.5516087 | 0.4991152 | 4 | LIPC/ABCG1/CLU/ABCA1    |
| Biological Process | GO:0046641 | positive regulation of alpha-beta T cell proliferation     | 4/2279 | 21/18866 | 0.2432628 | 0.5516087 | 0.4991152 | 4 | CD55/CCR2/TGFBR2/PTPRC  |
| Biological Process | GO:0048485 | sympathetic nervous system development                     | 4/2279 | 21/18866 | 0.2432628 | 0.5516087 | 0.4991152 | 4 | NRP2/PHOX2A/NF1/NTRK1   |
| Biological Process | GO:0051797 | regulation of hair follicle development                    | 4/2279 | 21/18866 | 0.2432628 | 0.5516087 | 0.4991152 | 4 | TNF/KRT17/CDH3/NUMA1    |
| Biological Process | GO:0061003 | positive regulation of dendritic spine morphogenesis       | 4/2279 | 21/18866 | 0.2432628 | 0.5516087 | 0.4991152 | 4 | BAIAP2/DNM1L/CUX2/DBNL  |
| Biological Process | GO:0072111 | cell proliferation involved in kidney development          | 4/2279 | 21/18866 | 0.2432628 | 0.5516087 | 0.4991152 | 4 | PDGFD/IL6R/PDGFB/PDGFRB |

|                    |            |                                                                     |        |          |           |           |           |   |                             |
|--------------------|------------|---------------------------------------------------------------------|--------|----------|-----------|-----------|-----------|---|-----------------------------|
| Biological Process | GO:0072574 | hepatocyte proliferation                                            | 4/2279 | 21/18866 | 0.2432628 | 0.5516087 | 0.4991152 | 4 | RPS6KA1/TNFAIP3/CPB2/CEBPB  |
| Biological Process | GO:0072575 | epithelial cell proliferation<br>involved in liver<br>morphogenesis | 4/2279 | 21/18866 | 0.2432628 | 0.5516087 | 0.4991152 | 4 | RPS6KA1/TNFAIP3/CPB2/CEBPB  |
| Biological Process | GO:0090280 | positive regulation of calcium<br>ion import                        | 4/2279 | 21/18866 | 0.2432628 | 0.5516087 | 0.4991152 | 4 | SPHK2/PDGFB/PDGFRB/TRPV2    |
| Biological Process | GO:0090312 | positive regulation of protein<br>deacetylation                     | 4/2279 | 21/18866 | 0.2432628 | 0.5516087 | 0.4991152 | 4 | C6orf89/ZBTB7B/CTBP1/SREBF1 |
| Biological Process | GO:0090330 | regulation of platelet<br>aggregation                               | 4/2279 | 21/18866 | 0.2432628 | 0.5516087 | 0.4991152 | 4 | CD9/PRKCA/UBASH3B/BLK       |
| Biological Process | GO:0098780 | response to mitochondrial<br>depolarisation                         | 4/2279 | 21/18866 | 0.2432628 | 0.5516087 | 0.4991152 | 4 | SMURF1/ATG14/HK2/PRKN       |
| Biological Process | GO:0099515 | actin filament-based<br>transport                                   | 4/2279 | 21/18866 | 0.2432628 | 0.5516087 | 0.4991152 | 4 | ACTN4/WASL/MYO5A/MYO1C      |
| Biological Process | GO:1902307 | positive regulation of sodium<br>ion transmembrane<br>transport     | 4/2279 | 21/18866 | 0.2432628 | 0.5516087 | 0.4991152 | 4 | FXYD1/DNM2/TESC/ACTN4       |
| Biological Process | GO:1903055 | positive regulation of<br>extracellular matrix<br>organization      | 4/2279 | 21/18866 | 0.2432628 | 0.5516087 | 0.4991152 | 4 | SMAD3/TGFB1/RB1/CPB2        |

|                    |            |                                                       |         |           |           |           |           |    |                                                                                                                                                                        |
|--------------------|------------|-------------------------------------------------------|---------|-----------|-----------|-----------|-----------|----|------------------------------------------------------------------------------------------------------------------------------------------------------------------------|
| Biological Process | GO:2000047 | regulation of cell-cell adhesion mediated by cadherin | 4/2279  | 21/18866  | 0.2432628 | 0.5516087 | 0.4991152 | 4  | NOTCH1/NOTCH4/PTPRU/FLOT1                                                                                                                                              |
| Biological Process | GO:0007088 | regulation of mitotic nuclear division                | 23/2279 | 163/18866 | 0.2436923 | 0.5516087 | 0.4991152 | 23 | TGFA/MAD1L1/TNKS/NSMCE2/RCC1/CUL3/CCDC8/CDC16/TACC3/NUMA1/PDGFB/NEK6/RB1/CDC45/ANAPC7/PDGFRB/HECW2/CDC14A/AURKAIP1/DAPK3/CDK13/PCID2/SLF1                              |
| Biological Process | GO:0031214 | biomineral tissue development                         | 23/2279 | 163/18866 | 0.2436923 | 0.5516087 | 0.4991152 | 23 | SBNO2/ITGB1BP1/SMAD3/SLC8A1/FGR/ALPL/ASGR2/WNT11/TGFB1/BMP1B/SGMS2/TSPEAR/NOTCH1/MEF2C/LTF/CEBPB/FOXO1/ANO6/FAM20C/ERCC2/TFIP11/RFLNA/NECTIN1                          |
| Biological Process | GO:0110148 | biomineralization                                     | 23/2279 | 163/18866 | 0.2436923 | 0.5516087 | 0.4991152 | 23 | SBNO2/ITGB1BP1/SMAD3/SLC8A1/FGR/ALPL/ASGR2/WNT11/TGFB1/BMP1B/SGMS2/TSPEAR/NOTCH1/MEF2C/LTF/CEBPB/FOXO1/ANO6/FAM20C/ERCC2/TFIP11/RFLNA/NECTIN1                          |
| Biological Process | GO:1902115 | regulation of organelle assembly                      | 27/2279 | 194/18866 | 0.2439857 | 0.5516087 | 0.4991152 | 27 | GSN/CDKL1/ULK1/AKAP13/DNM2/TNF/RCC1/DYNC1H1/CEP135/PIP4K2A/FEZ2/ASAP1/NRXN1/HTT/NUMA1/IFT140/TBC1D14/SDCCAG8/MEF2C/ARHGEF2/CYLD/SPAG5/EZR/NPRL2/PKAA1/CEP295NL/SEPTIN9 |
| Biological Process | GO:0045446 | endothelial cell differentiation                      | 17/2279 | 117/18866 | 0.2441777 | 0.5516087 | 0.4991152 | 17 | PDE4D/TJP2/RAP1B/TNF/CCM2/DLL1/RBPJ/TNFRSF1A/RAPGEF2/ENG/ADD1/NOTCH1/S1PR2/NOTCH4/PPP1R16B/EZR/MYADM                                                                   |
| Biological Process | GO:0000469 | cleavage involved in rRNA processing                  | 5/2279  | 28/18866  | 0.2445453 | 0.5516087 | 0.4991152 | 5  | EXOSC2/RCL1/NOB1/ERI3/NOP14                                                                                                                                            |
| Biological Process | GO:0002335 | mature B cell differentiation                         | 5/2279  | 28/18866  | 0.2445453 | 0.5516087 | 0.4991152 | 5  | DLL1/CMTM7/DOCK10/POU2F2/BCL3                                                                                                                                          |
| Biological Process | GO:0002360 | T cell lineage commitment                             | 5/2279  | 28/18866  | 0.2445453 | 0.5516087 | 0.4991152 | 5  | ZFPM1/LOXL3/LY9/BCL2/CYLD                                                                                                                                              |



|                    |            |                                                                          |        |          |           |           |           |   |                                  |
|--------------------|------------|--------------------------------------------------------------------------|--------|----------|-----------|-----------|-----------|---|----------------------------------|
| Biological Process | GO:0003180 | aortic valve morphogenesis                                               | 5/2279 | 28/18866 | 0.2445453 | 0.5516087 | 0.4991152 | 5 | NFATC1/TGFB1/RB1/NOTCH1/SLIT3    |
| Biological Process | GO:0006972 | hyperosmotic response                                                    | 5/2279 | 28/18866 | 0.2445453 | 0.5516087 | 0.4991152 | 5 | AQP1/ARHGEF2/SLC2A1/HNMT/SST     |
| Biological Process | GO:0007205 | protein kinase C-activating G protein-coupled receptor signaling pathway | 5/2279 | 28/18866 | 0.2445453 | 0.5516087 | 0.4991152 | 5 | AZU1/DGKQ/DGKA/DGKD/F2R          |
| Biological Process | GO:0008299 | isoprenoid biosynthetic process                                          | 5/2279 | 28/18866 | 0.2445453 | 0.5516087 | 0.4991152 | 5 | IDI1/DHRS9/RDH10/HMGCS1/ALDH1A2  |
| Biological Process | GO:0032800 | receptor biosynthetic process                                            | 5/2279 | 28/18866 | 0.2445453 | 0.5516087 | 0.4991152 | 5 | IL10/PPARG/TNF/HDAC1/ITGB3       |
| Biological Process | GO:0034311 | diol metabolic process                                                   | 5/2279 | 28/18866 | 0.2445453 | 0.5516087 | 0.4991152 | 5 | SPTLC2/SPHK2/SGPP1/SGPP2/PLPP3   |
| Biological Process | GO:0045745 | positive regulation of G protein-coupled receptor signaling pathway      | 5/2279 | 28/18866 | 0.2445453 | 0.5516087 | 0.4991152 | 5 | PRKCA/MRAP/PHB/PDE6H/ACP3        |
| Biological Process | GO:0051647 | nucleus localization                                                     | 5/2279 | 28/18866 | 0.2445453 | 0.5516087 | 0.4991152 | 5 | DCTN1/DYNC1H1/BIN1/FBXW11/SLIT1  |
| Biological Process | GO:0071168 | protein localization to chromatin                                        | 5/2279 | 28/18866 | 0.2445453 | 0.5516087 | 0.4991152 | 5 | SETD2/RB1/PIH1D1/CDC45/MACROH2A2 |

|                    |            |                                                                                   |         |           |           |           |           |    |                                                                                                                                                                                                                                                                                            |
|--------------------|------------|-----------------------------------------------------------------------------------|---------|-----------|-----------|-----------|-----------|----|--------------------------------------------------------------------------------------------------------------------------------------------------------------------------------------------------------------------------------------------------------------------------------------------|
| Biological Process | GO:0071450 | cellular response to oxygen radical                                               | 5/2279  | 28/18866  | 0.2445453 | 0.5516087 | 0.4991152 | 5  | MPO/TNF/NFE2L2/GLRX2/SIRT3                                                                                                                                                                                                                                                                 |
| Biological Process | GO:0071451 | cellular response to superoxide                                                   | 5/2279  | 28/18866  | 0.2445453 | 0.5516087 | 0.4991152 | 5  | MPO/TNF/NFE2L2/GLRX2/SIRT3                                                                                                                                                                                                                                                                 |
| Biological Process | GO:0071880 | adenylate cyclase-activating adrenergic receptor signaling pathway                | 5/2279  | 28/18866  | 0.2445453 | 0.5516087 | 0.4991152 | 5  | PDE4D/AKAP13/ADCY9/GNAI2/RAPGEF2                                                                                                                                                                                                                                                           |
| Biological Process | GO:0000725 | recombinational repair                                                            | 20/2279 | 140/18866 | 0.2446402 | 0.5516087 | 0.4991152 | 20 | BLM/SPIDR/BRCA2/RMI2/RAD52/SETD2/RTEL1/HUS1/NSMCE2/MCM5/RECQL5/MEIOB/AP5S1/MCM2/RAD21L1/DMC1/TP53BP1/RHNO1/SLX4/FBH1                                                                                                                                                                       |
| Biological Process | GO:0048284 | organelle fusion                                                                  | 20/2279 | 140/18866 | 0.2446402 | 0.5516087 | 0.4991152 | 20 | VAT1/ENO1/CALR/STX5/VTI1A/ANKFY1/TGFBRAP1/SPG7/UVRAG/ENO3/VPS18/VCPIP1/FIS1/DNM1L/DYSF/TSNARE1/VAV3/IRAG2/PRKN/RUBCNL                                                                                                                                                                      |
| Biological Process | GO:0016042 | lipid catabolic process                                                           | 46/2279 | 343/18866 | 0.2448447 | 0.5516087 | 0.4991152 | 46 | PNPLA2/PLA2G15/SORL1/MGLL/PLBD2/MFSD2A/HEXB/LIPC/YWHAH/ABHD16A/AMACR/PLD1/GPLD1/GALC/TNF/SMPDL3B/AOAH/ACOXL/AKR1D1/CRTC3/CYP4F3/ACADM/ACACB/MGST2/ABHD16B/FABP6/PLCB1/ACOX2/PLA1A/PRKCE/ABHD5/PCK2/ACAT1/PDE3B/PLCG1/ADTRP/CPT1A/PDXDC1/INPP5F/PLCD3/LPIN1/ASPG/LYPLA2/ACADVL/BSCL2/PRKAA1 |
| Biological Process | GO:0044380 | protein localization to cytoskeleton                                              | 9/2279  | 57/18866  | 0.2462066 | 0.5516087 | 0.4991152 | 9  | CSNK1D/CHAMP1/DISC1/DCTN2/NUMA1/KLHL21/MAP1A/SPAG5/CEP72                                                                                                                                                                                                                                   |
| Biological Process | GO:0046148 | pigment biosynthetic process                                                      | 9/2279  | 57/18866  | 0.2462066 | 0.5516087 | 0.4991152 | 9  | ZEB2/SLC11A2/FECH/CDH3/RAPGEF2/MYO5A/ALAS1/PPOX/TMEM14C                                                                                                                                                                                                                                    |
| Biological Process | GO:0061178 | regulation of insulin secretion involved in cellular response to glucose stimulus | 9/2279  | 57/18866  | 0.2462066 | 0.5516087 | 0.4991152 | 9  | NADK/LRP5L/ARRB1/GPLD1/ENY2/GHRL/KLF7/PRKCE/C2CD2L                                                                                                                                                                                                                                         |

|                    |            |                                                                                  |         |           |           |           |           |    |                                                                                                                                                               |
|--------------------|------------|----------------------------------------------------------------------------------|---------|-----------|-----------|-----------|-----------|----|---------------------------------------------------------------------------------------------------------------------------------------------------------------|
| Biological Process | GO:0070936 | protein K48-linked ubiquitination                                                | 9/2279  | 57/18866  | 0.2462066 | 0.5516087 | 0.4991152 | 9  | TRIM38/AMFR/TNFAIP3/UBE2Q2/UBE3A/UBE2D2/PELI1/MARCHF6/PRKN                                                                                                    |
| Biological Process | GO:0140056 | organelle localization by membrane tethering                                     | 24/2279 | 171/18866 | 0.2462359 | 0.5516087 | 0.4991152 | 24 | DCTN1/STX5/CSNK1D/NDE1/PACS2/DYNC1H1/TUBB4B/CEP135/CEP164/DCTN2/CEP78/VPS18/CTBP2/ATG14/CSNK1E/PPP2R1A/TUBA4A/SDCCAG8/PDZD8/ESYT1/CEP72/TSNARE1/NPHP4/GRAMD2A |
| Biological Process | GO:0055024 | regulation of cardiac muscle tissue development                                  | 15/2279 | 102/18866 | 0.2466469 | 0.5516087 | 0.4991152 | 15 | CTDP1/CREB1/MIR199A1/VGLL4/TGFBR2/DLL1/RIPK1/RBPJ/FGFR1/TGFB1/ARRB2/MEIS1/MIR199A2/NOTCH1/MEF2C                                                               |
| Biological Process | GO:0008637 | apoptotic mitochondrial changes                                                  | 18/2279 | 125/18866 | 0.2481577 | 0.5516087 | 0.4991152 | 18 | TFDP1/YWHAH/PAM16/BMF/CLU/CIDEB/AIFM2/HK2/NOL3/ARRB2/YWHAZ/FIS1/BCL2/DNM1L/TP53BP2/BCL2L1/YWHAQ/PRKN                                                          |
| Biological Process | GO:0032479 | regulation of type I interferon production                                       | 18/2279 | 125/18866 | 0.2481577 | 0.5516087 | 0.4991152 | 18 | IL10/TRIM38/IRF5/SETD2/TNFAIP3/POLR2F/TLR9/TRAIP/CRCP/NLRC5/CREBBP/DDX41/CYLD/RELA/FLOT1/HERC5/STING1/ILRUN                                                   |
| Biological Process | GO:0035270 | endocrine system development                                                     | 18/2279 | 125/18866 | 0.2481577 | 0.5516087 | 0.4991152 | 18 | ARID5B/CREB1/SMAD3/RHEB/RFX3/TG/DLL1/RBPJ/WNT11/NF1/GIPR/IL6R/ETS1/ARNTL/CDH1/PDGFRB/FOXO1/ALDH1A2                                                            |
| Biological Process | GO:0048593 | camera-type eye morphogenesis                                                    | 18/2279 | 125/18866 | 0.2481577 | 0.5516087 | 0.4991152 | 18 | MFSD2A/SKI/CRB1/HIPK2/DLL1/GNAT2/PAX2/NF1/SP3/MEIS1/RPGRIP1/ZHX2/SDK2/BCAR3/NRL/CABP4/TSKU/NECTIN1                                                            |
| Biological Process | GO:0006368 | transcription elongation from RNA polymerase II promoter                         | 13/2279 | 87/18866  | 0.2482701 | 0.5516087 | 0.4991152 | 13 | BRD4/CTDP1/WDR43/SETD2/POLR2F/RECQL5/ELL2/ENY2/MLLT1/CCNH/ERCC2/CDK13/PCID2                                                                                   |
| Biological Process | GO:0032436 | positive regulation of proteasomal ubiquitin-dependent protein catabolic process | 13/2279 | 87/18866  | 0.2482701 | 0.5516087 | 0.4991152 | 13 | RNF144A/FZR1/RNF19A/CSNK1D/CBFA2T3/CLU/SMAD7/CSNK1E/NFE2L2/RNF144B/RNF14/TRIB1/PRKN                                                                           |

|                    |            |                                                                                                    |         |           |           |           |           |    |                                                                                                                                                                                                                |
|--------------------|------------|----------------------------------------------------------------------------------------------------|---------|-----------|-----------|-----------|-----------|----|----------------------------------------------------------------------------------------------------------------------------------------------------------------------------------------------------------------|
| Biological Process | GO:0051781 | positive regulation of cell division                                                               | 13/2279 | 87/18866  | 0.2482701 | 0.5516087 | 0.4991152 | 13 | TGFA/ITGB1BP1/LBH/CUL3/TGFB1/SVIL/CSPP1/PDGFD/PDGFB/CAT/PRKCE/PDGFC/CDC14A                                                                                                                                     |
| Biological Process | GO:0090502 | RNA phosphodiester bond hydrolysis, endonucleolytic                                                | 13/2279 | 87/18866  | 0.2482701 | 0.5516087 | 0.4991152 | 13 | PIWIL4/ERN1/CPSF3/SLFN14/RCL1/AGO1/ZC3H12D/AGO2/EDC3/NOB1/SMG6/NOP14/SND1                                                                                                                                      |
| Biological Process | GO:2001057 | reactive nitrogen species metabolic process                                                        | 13/2279 | 87/18866  | 0.2482701 | 0.5516087 | 0.4991152 | 13 | IL10/SMAD3/DNM2/MIR199A1/TNF/NOS1AP/CLU/HBB/POR/ITGB2/MIR199A2/CX3CR1/MTARC1                                                                                                                                   |
| Biological Process | GO:0030072 | peptide hormone secretion                                                                          | 35/2279 | 257/18866 | 0.2485784 | 0.5516087 | 0.4991152 | 35 | NADK/ITPR2/MYRIP/CACNA1C/LRP5L/ARRB1/PRKCA/GPLD1/TNF/CCL5/ITSN1/ITPR1/RFX3/TCF7L2/HNF1A/PTPRN2/IL1RN/CRHBP/ENY2/MYO5A/GIPR/BLK/GHRL/KLF7/ARNTL/PER2/SLC16A1/PRKCE/SLC2A1/SREBF1/CPT1A/RPH3AL/C2CD2L/SIRT3/PRKN |
| Biological Process | GO:0000480 | endonucleolytic cleavage in 5'-ETS of tricistronic rRNA transcript (SSU-rRNA, 5.8S rRNA, LSU-rRNA) | 2/2279  | 8/18866   | 0.2505201 | 0.5516087 | 0.4991152 | 2  | RCL1/NOP14                                                                                                                                                                                                     |
| Biological Process | GO:0000733 | DNA strand renaturation                                                                            | 2/2279  | 8/18866   | 0.2505201 | 0.5516087 | 0.4991152 | 2  | BLM/SMARCA1                                                                                                                                                                                                    |
| Biological Process | GO:0000738 | DNA catabolic process, exonucleolytic                                                              | 2/2279  | 8/18866   | 0.2505201 | 0.5516087 | 0.4991152 | 2  | ERI3/ISG20                                                                                                                                                                                                     |
| Biological Process | GO:0001781 | neutrophil apoptotic process                                                                       | 2/2279  | 8/18866   | 0.2505201 | 0.5516087 | 0.4991152 | 2  | PIK3CD/ITPKB                                                                                                                                                                                                   |
| Biological Process | GO:0002118 | aggressive behavior                                                                                | 2/2279  | 8/18866   | 0.2505201 | 0.5516087 | 0.4991152 | 2  | CRHBP/KIRREL3                                                                                                                                                                                                  |

|                    |            |                                                                                                                   |        |         |           |           |           |   |              |
|--------------------|------------|-------------------------------------------------------------------------------------------------------------------|--------|---------|-----------|-----------|-----------|---|--------------|
| Biological Process | GO:0002246 | wound healing involved in inflammatory response                                                                   | 2/2279 | 8/18866 | 0.2505201 | 0.5516087 | 0.4991152 | 2 | TGFB1/F2R    |
| Biological Process | GO:0002484 | antigen processing and presentation of endogenous peptide antigen via MHC class I via ER pathway                  | 2/2279 | 8/18866 | 0.2505201 | 0.5516087 | 0.4991152 | 2 | HLA-C/HLA-F  |
| Biological Process | GO:0002486 | antigen processing and presentation of endogenous peptide antigen via MHC class I via ER pathway, TAP-independent | 2/2279 | 8/18866 | 0.2505201 | 0.5516087 | 0.4991152 | 2 | HLA-C/HLA-F  |
| Biological Process | GO:0002729 | positive regulation of natural killer cell cytokine production                                                    | 2/2279 | 8/18866 | 0.2505201 | 0.5516087 | 0.4991152 | 2 | CD226/HLA-F  |
| Biological Process | GO:0002732 | positive regulation of dendritic cell cytokine production                                                         | 2/2279 | 8/18866 | 0.2505201 | 0.5516087 | 0.4991152 | 2 | SCIMP/NOD2   |
| Biological Process | GO:0003190 | atrioventricular valve formation                                                                                  | 2/2279 | 8/18866 | 0.2505201 | 0.5516087 | 0.4991152 | 2 | ZFPM1/NOTCH1 |
| Biological Process | GO:0003339 | regulation of mesenchymal to epithelial transition involved in metanephros morphogenesis                          | 2/2279 | 8/18866 | 0.2505201 | 0.5516087 | 0.4991152 | 2 | PAX2/LIF     |
| Biological Process | GO:0006267 | pre-replicative complex assembly involved in nuclear cell cycle DNA replication                                   | 2/2279 | 8/18866 | 0.2505201 | 0.5516087 | 0.4991152 | 2 | MCM5/MCM2    |
| Biological Process | GO:0006384 | transcription initiation from RNA polymerase III promoter                                                         | 2/2279 | 8/18866 | 0.2505201 | 0.5516087 | 0.4991152 | 2 | CRCP/BRF1    |

|                    |            |                                            |        |         |           |           |           |   |                |
|--------------------|------------|--------------------------------------------|--------|---------|-----------|-----------|-----------|---|----------------|
| Biological Process | GO:0006548 | histidine catabolic process                | 2/2279 | 8/18866 | 0.2505201 | 0.5516087 | 0.4991152 | 2 | HAL/HNMT       |
| Biological Process | GO:0006678 | glucosylceramide metabolic process         | 2/2279 | 8/18866 | 0.2505201 | 0.5516087 | 0.4991152 | 2 | FA2H/PRKAA1    |
| Biological Process | GO:0006924 | activation-induced cell death of T cells   | 2/2279 | 8/18866 | 0.2505201 | 0.5516087 | 0.4991152 | 2 | RIPK3/FADD     |
| Biological Process | GO:0006975 | DNA damage induced protein phosphorylation | 2/2279 | 8/18866 | 0.2505201 | 0.5516087 | 0.4991152 | 2 | MAP2K6/CHEK2   |
| Biological Process | GO:0007217 | tachykinin receptor signaling pathway      | 2/2279 | 8/18866 | 0.2505201 | 0.5516087 | 0.4991152 | 2 | GRK5/GRK2      |
| Biological Process | GO:0007270 | neuron-neuron synaptic transmission        | 2/2279 | 8/18866 | 0.2505201 | 0.5516087 | 0.4991152 | 2 | ARID1B/KIF1B   |
| Biological Process | GO:0009120 | deoxyribonucleoside metabolic process      | 2/2279 | 8/18866 | 0.2505201 | 0.5516087 | 0.4991152 | 2 | TK2/TK1        |
| Biological Process | GO:0009756 | carbohydrate mediated signaling            | 2/2279 | 8/18866 | 0.2505201 | 0.5516087 | 0.4991152 | 2 | COLEC12/PIH1D1 |
| Biological Process | GO:0010501 | RNA secondary structure unwinding          | 2/2279 | 8/18866 | 0.2505201 | 0.5516087 | 0.4991152 | 2 | AGO1/AGO2      |

|                    |            |                                                                                              |        |         |           |           |           |   |                  |
|--------------------|------------|----------------------------------------------------------------------------------------------|--------|---------|-----------|-----------|-----------|---|------------------|
| Biological Process | GO:0010511 | regulation of phosphatidylinositol biosynthetic process                                      | 2/2279 | 8/18866 | 0.2505201 | 0.5516087 | 0.4991152 | 2 | FPR2/PDGFB       |
| Biological Process | GO:0010616 | negative regulation of cardiac muscle adaptation                                             | 2/2279 | 8/18866 | 0.2505201 | 0.5516087 | 0.4991152 | 2 | SMAD3/FOXO1      |
| Biological Process | GO:0010624 | regulation of Schwann cell proliferation                                                     | 2/2279 | 8/18866 | 0.2505201 | 0.5516087 | 0.4991152 | 2 | SKI/CERS2        |
| Biological Process | GO:0010871 | negative regulation of receptor biosynthetic process                                         | 2/2279 | 8/18866 | 0.2505201 | 0.5516087 | 0.4991152 | 2 | PPARG/ITGB3      |
| Biological Process | GO:0010966 | regulation of phosphate transport                                                            | 2/2279 | 8/18866 | 0.2505201 | 0.5516087 | 0.4991152 | 2 | FGFR1/CEBPB      |
| Biological Process | GO:0014807 | regulation of somitogenesis                                                                  | 2/2279 | 8/18866 | 0.2505201 | 0.5516087 | 0.4991152 | 2 | DLL1/NOTCH1      |
| Biological Process | GO:0014866 | skeletal myofibril assembly                                                                  | 2/2279 | 8/18866 | 0.2505201 | 0.5516087 | 0.4991152 | 2 | TTN/MYH11        |
| Biological Process | GO:0015014 | heparan sulfate proteoglycan biosynthetic process, polysaccharide chain biosynthetic process | 2/2279 | 8/18866 | 0.2505201 | 0.5516087 | 0.4991152 | 2 | CSGALNACT1/NDST1 |
| Biological Process | GO:0015840 | urea transport                                                                               | 2/2279 | 8/18866 | 0.2505201 | 0.5516087 | 0.4991152 | 2 | AQP3/AQP9        |

|                    |            |                                                                        |        |         |           |           |           |   |               |
|--------------------|------------|------------------------------------------------------------------------|--------|---------|-----------|-----------|-----------|---|---------------|
| Biological Process | GO:0015884 | folic acid transport                                                   | 2/2279 | 8/18866 | 0.2505201 | 0.5516087 | 0.4991152 | 2 | FOLR3/SLC19A1 |
| Biological Process | GO:0015889 | cobalamin transport                                                    | 2/2279 | 8/18866 | 0.2505201 | 0.5516087 | 0.4991152 | 2 | ABCC1/CD320   |
| Biological Process | GO:0015911 | long-chain fatty acid import across plasma membrane                    | 2/2279 | 8/18866 | 0.2505201 | 0.5516087 | 0.4991152 | 2 | THBS1/SLC2A1  |
| Biological Process | GO:0031064 | negative regulation of histone deacetylation                           | 2/2279 | 8/18866 | 0.2505201 | 0.5516087 | 0.4991152 | 2 | SKI/SPHK2     |
| Biological Process | GO:0032056 | positive regulation of translation in response to stress               | 2/2279 | 8/18866 | 0.2505201 | 0.5516087 | 0.4991152 | 2 | NCK2/EIF4G1   |
| Biological Process | GO:0032119 | sequestering of zinc ion                                               | 2/2279 | 8/18866 | 0.2505201 | 0.5516087 | 0.4991152 | 2 | S100A8/AP3D1  |
| Biological Process | GO:0032329 | serine transport                                                       | 2/2279 | 8/18866 | 0.2505201 | 0.5516087 | 0.4991152 | 2 | SLC1A5/SFXN1  |
| Biological Process | GO:0032471 | negative regulation of endoplasmic reticulum calcium ion concentration | 2/2279 | 8/18866 | 0.2505201 | 0.5516087 | 0.4991152 | 2 | THADA/FIS1    |
| Biological Process | GO:0032927 | positive regulation of activin receptor signaling pathway              | 2/2279 | 8/18866 | 0.2505201 | 0.5516087 | 0.4991152 | 2 | ZC3H3/NODAL   |



|                    |            |                                                                         |        |         |           |           |           |   |                |
|--------------------|------------|-------------------------------------------------------------------------|--------|---------|-----------|-----------|-----------|---|----------------|
| Biological Process | GO:0033007 | negative regulation of mast cell activation involved in immune response | 2/2279 | 8/18866 | 0.2505201 | 0.5516087 | 0.4991152 | 2 | CD84/FER       |
| Biological Process | GO:0033034 | positive regulation of myeloid cell apoptotic process                   | 2/2279 | 8/18866 | 0.2505201 | 0.5516087 | 0.4991152 | 2 | PIK3CD/MEF2C   |
| Biological Process | GO:0033085 | negative regulation of T cell differentiation in thymus                 | 2/2279 | 8/18866 | 0.2505201 | 0.5516087 | 0.4991152 | 2 | ZC3H8/TMEM131L |
| Biological Process | GO:0033601 | positive regulation of mammary gland epithelial cell proliferation      | 2/2279 | 8/18866 | 0.2505201 | 0.5516087 | 0.4991152 | 2 | RREB1/RTN4     |
| Biological Process | GO:0034498 | early endosome to Golgi transport                                       | 2/2279 | 8/18866 | 0.2505201 | 0.5516087 | 0.4991152 | 2 | STX5/TRAPPC10  |
| Biological Process | GO:0034983 | peptidyl-lysine deacetylation                                           | 2/2279 | 8/18866 | 0.2505201 | 0.5516087 | 0.4991152 | 2 | HDAC4/SIRT3    |
| Biological Process | GO:0035608 | protein deglutamylation                                                 | 2/2279 | 8/18866 | 0.2505201 | 0.5516087 | 0.4991152 | 2 | AGBL5/AGBL2    |
| Biological Process | GO:0035912 | dorsal aorta morphogenesis                                              | 2/2279 | 8/18866 | 0.2505201 | 0.5516087 | 0.4991152 | 2 | RBPJ/ENG       |
| Biological Process | GO:0036155 | acylglycerol acyl-chain remodeling                                      | 2/2279 | 8/18866 | 0.2505201 | 0.5516087 | 0.4991152 | 2 | PNPLA2/MGLL    |

|                    |            |                                                                |        |         |           |           |           |   |               |
|--------------------|------------|----------------------------------------------------------------|--------|---------|-----------|-----------|-----------|---|---------------|
| Biological Process | GO:0036388 | pre-replicative complex assembly                               | 2/2279 | 8/18866 | 0.2505201 | 0.5516087 | 0.4991152 | 2 | MCM5/MCM2     |
| Biological Process | GO:0038027 | apolipoprotein A-I-mediated signaling pathway                  | 2/2279 | 8/18866 | 0.2505201 | 0.5516087 | 0.4991152 | 2 | ITGB3/ABCA1   |
| Biological Process | GO:0043320 | natural killer cell degranulation                              | 2/2279 | 8/18866 | 0.2505201 | 0.5516087 | 0.4991152 | 2 | RAB27A/HLA-F  |
| Biological Process | GO:0043615 | astrocyte cell migration                                       | 2/2279 | 8/18866 | 0.2505201 | 0.5516087 | 0.4991152 | 2 | HEXB/CCR2     |
| Biological Process | GO:0044771 | meiotic cell cycle phase transition                            | 2/2279 | 8/18866 | 0.2505201 | 0.5516087 | 0.4991152 | 2 | CDC25A/OVOL1  |
| Biological Process | GO:0045008 | depyrimidination                                               | 2/2279 | 8/18866 | 0.2505201 | 0.5516087 | 0.4991152 | 2 | UNG/NTHL1     |
| Biological Process | GO:0045607 | regulation of inner ear auditory receptor cell differentiation | 2/2279 | 8/18866 | 0.2505201 | 0.5516087 | 0.4991152 | 2 | DLL1/NOTCH1   |
| Biological Process | GO:0045631 | regulation of mechanoreceptor differentiation                  | 2/2279 | 8/18866 | 0.2505201 | 0.5516087 | 0.4991152 | 2 | DLL1/NOTCH1   |
| Biological Process | GO:0045924 | regulation of female receptivity                               | 2/2279 | 8/18866 | 0.2505201 | 0.5516087 | 0.4991152 | 2 | PPP1R1B/NCOA1 |

|                    |            |                                                                |        |         |           |           |           |   |                |
|--------------------|------------|----------------------------------------------------------------|--------|---------|-----------|-----------|-----------|---|----------------|
| Biological Process | GO:0046654 | tetrahydrofolate biosynthetic process                          | 2/2279 | 8/18866 | 0.2505201 | 0.5516087 | 0.4991152 | 2 | MTHFD1L/MTHFD1 |
| Biological Process | GO:0048280 | vesicle fusion with Golgi apparatus                            | 2/2279 | 8/18866 | 0.2505201 | 0.5516087 | 0.4991152 | 2 | STX5/VTI1A     |
| Biological Process | GO:0048549 | positive regulation of pinocytosis                             | 2/2279 | 8/18866 | 0.2505201 | 0.5516087 | 0.4991152 | 2 | ANKFY1/ACTN4   |
| Biological Process | GO:0048733 | sebaceous gland development                                    | 2/2279 | 8/18866 | 0.2505201 | 0.5516087 | 0.4991152 | 2 | RBPJ/FA2H      |
| Biological Process | GO:0051045 | negative regulation of membrane protein ectodomain proteolysis | 2/2279 | 8/18866 | 0.2505201 | 0.5516087 | 0.4991152 | 2 | TIMP2/IL10     |
| Biological Process | GO:0051126 | negative regulation of actin nucleation                        | 2/2279 | 8/18866 | 0.2505201 | 0.5516087 | 0.4991152 | 2 | GMFB/GMFG      |
| Biological Process | GO:0051683 | establishment of Golgi localization                            | 2/2279 | 8/18866 | 0.2505201 | 0.5516087 | 0.4991152 | 2 | YWHAZ/RIPOR1   |
| Biological Process | GO:0052805 | imidazole-containing compound catabolic process                | 2/2279 | 8/18866 | 0.2505201 | 0.5516087 | 0.4991152 | 2 | HAL/HNMT       |
| Biological Process | GO:0060137 | maternal process involved in parturition                       | 2/2279 | 8/18866 | 0.2505201 | 0.5516087 | 0.4991152 | 2 | ARNTL/NODAL    |

|                    |            |                                                                                            |        |         |           |           |           |   |                  |
|--------------------|------------|--------------------------------------------------------------------------------------------|--------|---------|-----------|-----------|-----------|---|------------------|
| Biological Process | GO:0060215 | primitive hemopoiesis                                                                      | 2/2279 | 8/18866 | 0.2505201 | 0.5516087 | 0.4991152 | 2 | ZFPM1/STK3       |
| Biological Process | GO:0060355 | positive regulation of cell adhesion molecule production                                   | 2/2279 | 8/18866 | 0.2505201 | 0.5516087 | 0.4991152 | 2 | COLEC12/FLOT1    |
| Biological Process | GO:0060373 | regulation of ventricular cardiac muscle cell membrane depolarization                      | 2/2279 | 8/18866 | 0.2505201 | 0.5516087 | 0.4991152 | 2 | GJAS/SMAD7       |
| Biological Process | GO:0060534 | trachea cartilage development                                                              | 2/2279 | 8/18866 | 0.2505201 | 0.5516087 | 0.4991152 | 2 | RARA/RARG        |
| Biological Process | GO:0061179 | negative regulation of insulin secretion involved in cellular response to glucose stimulus | 2/2279 | 8/18866 | 0.2505201 | 0.5516087 | 0.4991152 | 2 | ENY2/KLF7        |
| Biological Process | GO:0061669 | spontaneous neurotransmitter secretion                                                     | 2/2279 | 8/18866 | 0.2505201 | 0.5516087 | 0.4991152 | 2 | RPH3A/PRKN       |
| Biological Process | GO:0070212 | protein poly-ADP-ribosylation                                                              | 2/2279 | 8/18866 | 0.2505201 | 0.5516087 | 0.4991152 | 2 | TNKS/PARP10      |
| Biological Process | GO:0071169 | establishment of protein localization to chromatin                                         | 2/2279 | 8/18866 | 0.2505201 | 0.5516087 | 0.4991152 | 2 | PIH1D1/MACROH2A2 |
| Biological Process | GO:0071476 | cellular hypotonic response                                                                | 2/2279 | 8/18866 | 0.2505201 | 0.5516087 | 0.4991152 | 2 | MYLK/CAB39       |

|                    |            |                                                          |        |         |           |           |           |   |               |
|--------------------|------------|----------------------------------------------------------|--------|---------|-----------|-----------|-----------|---|---------------|
| Biological Process | GO:0071493 | cellular response to UV-B                                | 2/2279 | 8/18866 | 0.2505201 | 0.5516087 | 0.4991152 | 2 | MFAP4/CRIP1   |
| Biological Process | GO:0071864 | positive regulation of cell proliferation in bone marrow | 2/2279 | 8/18866 | 0.2505201 | 0.5516087 | 0.4991152 | 2 | MAP3K3/MEF2C  |
| Biological Process | GO:0072239 | metanephric glomerulus vasculature development           | 2/2279 | 8/18866 | 0.2505201 | 0.5516087 | 0.4991152 | 2 | PDGFB/PDGFRB  |
| Biological Process | GO:0072386 | plus-end-directed organelle transport along microtubule  | 2/2279 | 8/18866 | 0.2505201 | 0.5516087 | 0.4991152 | 2 | KIF13A/KIFAP3 |
| Biological Process | GO:0090650 | cellular response to oxygen-glucose deprivation          | 2/2279 | 8/18866 | 0.2505201 | 0.5516087 | 0.4991152 | 2 | AQP3/DNM1L    |
| Biological Process | GO:0090674 | endothelial cell-matrix adhesion via fibronectin         | 2/2279 | 8/18866 | 0.2505201 | 0.5516087 | 0.4991152 | 2 | RIN2/CEACAM6  |
| Biological Process | GO:0097049 | motor neuron apoptotic process                           | 2/2279 | 8/18866 | 0.2505201 | 0.5516087 | 0.4991152 | 2 | CRLF1/FADD    |
| Biological Process | GO:0097210 | response to gonadotropin-releasing hormone               | 2/2279 | 8/18866 | 0.2505201 | 0.5516087 | 0.4991152 | 2 | RAP1B/CRHBP   |
| Biological Process | GO:1900193 | regulation of oocyte maturation                          | 2/2279 | 8/18866 | 0.2505201 | 0.5516087 | 0.4991152 | 2 | PPP2R1A/NPPC  |

|                    |            |                                                                                           |        |         |           |           |           |   |                |
|--------------------|------------|-------------------------------------------------------------------------------------------|--------|---------|-----------|-----------|-----------|---|----------------|
| Biological Process | GO:1901213 | regulation of transcription from RNA polymerase II promoter involved in heart development | 2/2279 | 8/18866 | 0.2505201 | 0.5516087 | 0.4991152 | 2 | RBPJ/NOTCH1    |
| Biological Process | GO:1901533 | negative regulation of hematopoietic progenitor cell differentiation                      | 2/2279 | 8/18866 | 0.2505201 | 0.5516087 | 0.4991152 | 2 | NFE2L2/NOTCH1  |
| Biological Process | GO:1901993 | regulation of meiotic cell cycle phase transition                                         | 2/2279 | 8/18866 | 0.2505201 | 0.5516087 | 0.4991152 | 2 | CDC25A/OVOL1   |
| Biological Process | GO:1902299 | pre-replicative complex assembly involved in cell cycle DNA replication                   | 2/2279 | 8/18866 | 0.2505201 | 0.5516087 | 0.4991152 | 2 | MCM5/MCM2      |
| Biological Process | GO:1902857 | positive regulation of non-motile cilium assembly                                         | 2/2279 | 8/18866 | 0.2505201 | 0.5516087 | 0.4991152 | 2 | CEP135/SEPTIN9 |
| Biological Process | GO:1903243 | negative regulation of cardiac muscle hypertrophy in response to stress                   | 2/2279 | 8/18866 | 0.2505201 | 0.5516087 | 0.4991152 | 2 | SMAD3/FOXO1    |
| Biological Process | GO:1903659 | regulation of complement-dependent cytotoxicity                                           | 2/2279 | 8/18866 | 0.2505201 | 0.5516087 | 0.4991152 | 2 | CD55/CD59      |
| Biological Process | GO:1903979 | negative regulation of microglial cell activation                                         | 2/2279 | 8/18866 | 0.2505201 | 0.5516087 | 0.4991152 | 2 | PTPRC/GRN      |
| Biological Process | GO:1904180 | negative regulation of membrane depolarization                                            | 2/2279 | 8/18866 | 0.2505201 | 0.5516087 | 0.4991152 | 2 | HSH2D/BCL2     |

|                    |            |                                                                                       |        |         |           |           |           |   |                |
|--------------------|------------|---------------------------------------------------------------------------------------|--------|---------|-----------|-----------|-----------|---|----------------|
| Biological Process | GO:1904354 | negative regulation of telomere capping                                               | 2/2279 | 8/18866 | 0.2505201 | 0.5516087 | 0.4991152 | 2 | SMG6/ERCC1     |
| Biological Process | GO:1904491 | protein localization to ciliary transition zone                                       | 2/2279 | 8/18866 | 0.2505201 | 0.5516087 | 0.4991152 | 2 | NPHP4/CPLANE1  |
| Biological Process | GO:1904904 | regulation of endothelial cell-matrix adhesion via fibronectin                        | 2/2279 | 8/18866 | 0.2505201 | 0.5516087 | 0.4991152 | 2 | RIN2/CEACAM6   |
| Biological Process | GO:1905906 | regulation of amyloid fibril formation                                                | 2/2279 | 8/18866 | 0.2505201 | 0.5516087 | 0.4991152 | 2 | APP/CLU        |
| Biological Process | GO:1990384 | hyaloid vascular plexus regression                                                    | 2/2279 | 8/18866 | 0.2505201 | 0.5516087 | 0.4991152 | 2 | NINJ1/FLT1     |
| Biological Process | GO:1990414 | replication-born double-strand break repair via sister chromatid exchange             | 2/2279 | 8/18866 | 0.2505201 | 0.5516087 | 0.4991152 | 2 | RECQL5/RAD21L1 |
| Biological Process | GO:2000389 | regulation of neutrophil extravasation                                                | 2/2279 | 8/18866 | 0.2505201 | 0.5516087 | 0.4991152 | 2 | FUT7/IL1R1     |
| Biological Process | GO:2000617 | positive regulation of histone H3-K9 acetylation                                      | 2/2279 | 8/18866 | 0.2505201 | 0.5516087 | 0.4991152 | 2 | SPHK2/PIH1D1   |
| Biological Process | GO:2000698 | positive regulation of epithelial cell differentiation involved in kidney development | 2/2279 | 8/18866 | 0.2505201 | 0.5516087 | 0.4991152 | 2 | PAX2/LIF       |

|                    |            |                                                                   |         |           |           |           |           |    |                                                                                                                           |
|--------------------|------------|-------------------------------------------------------------------|---------|-----------|-----------|-----------|-----------|----|---------------------------------------------------------------------------------------------------------------------------|
| Biological Process | GO:2000980 | regulation of inner ear receptor cell differentiation             | 2/2279  | 8/18866   | 0.2505201 | 0.5516087 | 0.4991152 | 2  | DLL1/NOTCH1                                                                                                               |
| Biological Process | GO:2001016 | positive regulation of skeletal muscle cell differentiation       | 2/2279  | 8/18866   | 0.2505201 | 0.5516087 | 0.4991152 | 2  | ARNTL/MEF2C                                                                                                               |
| Biological Process | GO:2001027 | negative regulation of endothelial cell chemotaxis                | 2/2279  | 8/18866   | 0.2505201 | 0.5516087 | 0.4991152 | 2  | THBS1/NOTCH1                                                                                                              |
| Biological Process | GO:2001187 | positive regulation of CD8-positive, alpha-beta T cell activation | 2/2279  | 8/18866   | 0.2505201 | 0.5516087 | 0.4991152 | 2  | RUNX1/RUNX3                                                                                                               |
| Biological Process | GO:0048592 | eye morphogenesis                                                 | 22/2279 | 156/18866 | 0.2506085 | 0.5516755 | 0.4991756 | 22 | MFSD2A/SKI/CRB1/HIPK2/DLL1/GNAT2/PAX2/NF1/SP3/RARG/PRKCI/MEIS1/BCL2/RPGRIP1/ZHX2/COL5A1/SDK2/BCAR3/NRL/CABP4/TSKU/NECTIN1 |
| Biological Process | GO:0006289 | nucleotide-excision repair                                        | 16/2279 | 110/18866 | 0.2513237 | 0.5528656 | 0.5002524 | 16 | POLE/BRCA2/RAD52/NEIL3/HUS1/POLR2F/COPS5/NTHL1/CCNH/COPS3/ERCC1/SLX4/KAT7/POLD3/XPA/ERCC2                                 |
| Biological Process | GO:0006664 | glycolipid metabolic process                                      | 16/2279 | 110/18866 | 0.2513237 | 0.5528656 | 0.5002524 | 16 | HEXB/PIGL/PIGU/GPLD1/GALC/PIGN/B3GNT5/ST8SIA6/ST3GAL4/B4GALT3/PIGQ/FA2H/ESYT1/CERK/ST3GAL2/PRKAA1                         |
| Biological Process | GO:1901800 | positive regulation of proteasomal protein catabolic process      | 16/2279 | 110/18866 | 0.2513237 | 0.5528656 | 0.5002524 | 16 | RNF144A/FZR1/RNF19A/CSNK1D/CBFA2T3/EDEM1/CLU/SMAD7/EDEM2/CSNK1E/NFE2L2/RNF144B/RNF14/TRIB1/RNF40/PRKN                     |
| Biological Process | GO:0042770 | signal transduction in response to DNA damage                     | 19/2279 | 133/18866 | 0.2517257 | 0.5536217 | 0.5009366 | 19 | SPRED2/FZR1/TFDP1/BRCA2/NDRG1/HIPK2/E2F7/PCBP4/ZNF385A/ARID3A/SP100/FOXM1/CHEK2/ANKRD1/BCL3/PAXIP1/MARCH7/ABRAXAS1/BABAM2 |



|                    |            |                                                        |         |           |           |           |           |    |                                                                                                                                                                          |
|--------------------|------------|--------------------------------------------------------|---------|-----------|-----------|-----------|-----------|----|--------------------------------------------------------------------------------------------------------------------------------------------------------------------------|
| Biological Process | GO:0001774 | microglial cell activation                             | 8/2279  | 50/18866  | 0.2522951 | 0.5542325 | 0.5014892 | 8  | AZU1/TNF/FPR2/APP/CLU/PTPRC/GRN/ITGB2                                                                                                                                    |
| Biological Process | GO:0002269 | leukocyte activation involved in inflammatory response | 8/2279  | 50/18866  | 0.2522951 | 0.5542325 | 0.5014892 | 8  | AZU1/TNF/FPR2/APP/CLU/PTPRC/GRN/ITGB2                                                                                                                                    |
| Biological Process | GO:0031648 | protein destabilization                                | 8/2279  | 50/18866  | 0.2522951 | 0.5542325 | 0.5014892 | 8  | GSN/CCDC88C/CUL3/CTSH/HTT/CREBBP/FBXW11/PRKN                                                                                                                             |
| Biological Process | GO:0045806 | negative regulation of endocytosis                     | 8/2279  | 50/18866  | 0.2522951 | 0.5542325 | 0.5014892 | 8  | MIR199A1/PACSIN2/ANKRD13B/MIR27A/ANKRD13D/NR1H2/ANKRD13A/MIR199A2                                                                                                        |
| Biological Process | GO:2000725 | regulation of cardiac muscle cell differentiation      | 8/2279  | 50/18866  | 0.2522951 | 0.5542325 | 0.5014892 | 8  | CTDP1/MIR199A1/DLL1/RBPJ/TGFB1/ARRB2/MIR199A2/MEF2C                                                                                                                      |
| Biological Process | GO:0050864 | regulation of B cell activation                        | 27/2279 | 195/18866 | 0.2526811 | 0.5549521 | 0.5021404 | 27 | IL10/INPP5D/TNFAIP3/NFATC2/TNFSF13B/TLR9/MNDA/IGHV6-1/PTPN6/TNFRSF21/TGFB1/BLK/PTPRC/CD320/NOD2/BCL2/TP53BP1/MEF2C/BANK1/TNFSF13/CYLD/INHBA/PELI1/PCID2/PAXIP1/VAV3/NSD2 |
| Biological Process | GO:0046165 | alcohol biosynthetic process                           | 23/2279 | 164/18866 | 0.2531946 | 0.5559515 | 0.5030447 | 23 | GF11/SPTLC2/IDI1/VDR/ITPKB/MBTPS1/TNF/ABCG1/PGP/P2RY6/SPHK2/HRH1/DGKQ/POR/ACACB/IMPA2/ACACA/PCK2/HMGCS1/SCD/SREBF1/PRKAA1/IP6K1                                          |
| Biological Process | GO:0007589 | body fluid secretion                                   | 14/2279 | 95/18866  | 0.2539102 | 0.5573938 | 0.5043497 | 14 | NCOR2/CREB1/VDR/STAT5A/ZBTB7B/AQP1/NR1H2/HK2/NCOA1/PRKCE/USF2/SLC29A1/ATP7B/DHODH                                                                                        |
| Biological Process | GO:0007569 | cell aging                                             | 17/2279 | 118/18866 | 0.255465  | 0.5599118 | 0.5066281 | 17 | CALR/FZR1/MAP3K3/BRCA2/NSMCE2/AKT3/ILK/ZMIZ1/ENG/VASH1/ARNTL/NEK6/MORC3/BCL2/FOXO1/CHEK2/ERCC1                                                                           |

|                    |            |                                                                     |         |           |           |           |           |    |                                                                                                                                                                                                           |
|--------------------|------------|---------------------------------------------------------------------|---------|-----------|-----------|-----------|-----------|----|-----------------------------------------------------------------------------------------------------------------------------------------------------------------------------------------------------------|
| Biological Process | GO:2000736 | regulation of stem cell differentiation                             | 17/2279 | 118/18866 | 0.255465  | 0.5599118 | 0.5066281 | 17 | TACSTD2/MYB/RUNX1/LBH/TCF12/KDM4C/SETD1A/PSMF1/NFE2L2/PUS7/ESRRB/TCF3/PSMB7/NOTCH1/TEAD2/PSMD13/CDK13                                                                                                     |
| Biological Process | GO:0035773 | insulin secretion involved in cellular response to glucose stimulus | 10/2279 | 65/18866  | 0.2554689 | 0.5599118 | 0.5066281 | 10 | NADK/LRP5L/ARRB1/GLPD1/PTPRN2/ENY2/GHRL/KLF7/PRKCE/C2CD2L                                                                                                                                                 |
| Biological Process | GO:0060389 | pathway-restricted SMAD protein phosphorylation                     | 10/2279 | 65/18866  | 0.2554689 | 0.5599118 | 0.5066281 | 10 | LDLRAD4/TGFBR2/SMAD7/TGFB1/BMPER/ENG/RBPMS/GDF6/INHBA/NODAL                                                                                                                                               |
| Biological Process | GO:1905953 | negative regulation of lipid localization                           | 10/2279 | 65/18866  | 0.2554689 | 0.5599118 | 0.5066281 | 10 | PNPLA2/PPARG/TNF/ABCG1/THBS1/MIR27A/NR1H2/ITGB3/ABCA1/ABHD5                                                                                                                                               |
| Biological Process | GO:0002312 | B cell activation involved in immune response                       | 12/2279 | 80/18866  | 0.2555287 | 0.5599118 | 0.5066281 | 12 | IL10/DLL1/UNG/TGFB1/PTPRC/DOCK10/TP53BP1/ERCC1/TNFSF13/BCL3/PAXIP1/NSD2                                                                                                                                   |
| Biological Process | GO:0003151 | outflow tract morphogenesis                                         | 12/2279 | 80/18866  | 0.2555287 | 0.5599118 | 0.5066281 | 12 | ZFPM1/NRP2/GJA5/TGFBR2/RBPJ/ILK/WNT11/RARA/ENG/NOTCH1/MEF2C/NEDD4                                                                                                                                         |
| Biological Process | GO:0006110 | regulation of glycolytic process                                    | 12/2279 | 80/18866  | 0.2555287 | 0.5599118 | 0.5066281 | 12 | HDAC4/PRKAG2/PFKFB4/RAE1/CBFA2T3/APP/PGAM1/NUP93/SEC13/ESRRB/PFKFB3/PRKAA1                                                                                                                                |
| Biological Process | GO:0003007 | heart morphogenesis                                                 | 35/2279 | 258/18866 | 0.2561821 | 0.5612142 | 0.5078065 | 35 | ZFPM1/RXRA/NRP2/TTN/SMAD3/SUFU/GJA5/MICAL2/RTN4/CCM2L/TGFBR2/SYNPO2L/DLL1/RBPJ/MIB1/ILK/SMAD7/WNT11/ZMIZ1/TGFB1/RARA/GRHL2/ENG/NOTCH1/COL5A1/MEF2C/FHL2/SLIT3/NEDD4/TMED2/TEAD2/ANKRD1/ALDH1A2/NODAL/NSD2 |
| Biological Process | GO:1901796 | regulation of signal transduction by p53 class mediator             | 25/2279 | 180/18866 | 0.2577129 | 0.5643295 | 0.5106253 | 25 | SPRED2/BLM/PRKAG2/RMI2/HUS1/HIPK2/RRM2B/EHMT2/ZNF385A/PRKAB1/TAF10/HDAC1/DYRK2/MTA2/ANKRD2/BCL2/RHNO1/CHEK2/TP53BP2/ANKRD1/HEXIM1/ING5/PRKAA1/PRKN/MARCHF7                                                |

|                    |            |                                                                                                                                                  |        |          |           |           |           |   |                                                    |
|--------------------|------------|--------------------------------------------------------------------------------------------------------------------------------------------------|--------|----------|-----------|-----------|-----------|---|----------------------------------------------------|
| Biological Process | GO:0002823 | negative regulation of adaptive immune response based on somatic recombination of immune receptors built from immunoglobulin superfamily domains | 7/2279 | 43/18866 | 0.2582575 | 0.5643295 | 0.5106253 | 7 | LOXL3/DUSP22/HLA-F/PTPN6/SMAD7/ZBTB7B/PTPRC        |
| Biological Process | GO:0006308 | DNA catabolic process                                                                                                                            | 7/2279 | 43/18866 | 0.2582575 | 0.5643295 | 0.5106253 | 7 | CECR2/PAM16/ERI3/DFFB/DNASE1L3/ISG20/FBH1          |
| Biological Process | GO:0015701 | bicarbonate transport                                                                                                                            | 7/2279 | 43/18866 | 0.2582575 | 0.5643295 | 0.5106253 | 7 | SLC26A1/HBB/AQP1/CYB5RL/CA3/CA1/CA12               |
| Biological Process | GO:0015804 | neutral amino acid transport                                                                                                                     | 7/2279 | 43/18866 | 0.2582575 | 0.5643295 | 0.5106253 | 7 | SLC1A5/SLC43A2/SLC7A5/SFXN1/SLC36A3/SLC43A1/SLC7A8 |
| Biological Process | GO:0019432 | triglyceride biosynthetic process                                                                                                                | 7/2279 | 43/18866 | 0.2582575 | 0.5643295 | 0.5106253 | 7 | ACSL1/MFSD2A/GPLD1/NR1H2/PCK2/SREBF1/LPIN1         |
| Biological Process | GO:0021762 | substantia nigra development                                                                                                                     | 7/2279 | 43/18866 | 0.2582575 | 0.5643295 | 0.5106253 | 7 | YWHAH/PADI2/MBP/SYNGR3/YWHAQ/SYPL2/NDRG2           |
| Biological Process | GO:0030517 | negative regulation of axon extension                                                                                                            | 7/2279 | 43/18866 | 0.2582575 | 0.5643295 | 0.5106253 | 7 | SEMA6B/SEMA4A/RTN4/SEMA4B/IFRD1/SEMA4D/CDKL3       |
| Biological Process | GO:0045773 | positive regulation of axon extension                                                                                                            | 7/2279 | 43/18866 | 0.2582575 | 0.5643295 | 0.5106253 | 7 | DISC1/ILK/CDH4/CYFIP1/TRPV2/NDEL1/DBNL             |
| Biological Process | GO:0086004 | regulation of cardiac muscle cell contraction                                                                                                    | 7/2279 | 43/18866 | 0.2582575 | 0.5643295 | 0.5106253 | 7 | PDE4D/CACNA1C/GJA5/JUP/BIN1/NOS1AP/ANK2            |

|                    |            |                                                                                |         |           |           |           |           |    |                                                                                                                                                                                                                                                                   |
|--------------------|------------|--------------------------------------------------------------------------------|---------|-----------|-----------|-----------|-----------|----|-------------------------------------------------------------------------------------------------------------------------------------------------------------------------------------------------------------------------------------------------------------------|
| Biological Process | GO:1901659 | glycosyl compound biosynthetic process                                         | 7/2279  | 43/18866  | 0.2582575 | 0.5643295 | 0.5106253 | 7  | CDA/TK2/UCK2/GUK1/DHODH/TK1/IMPDH1                                                                                                                                                                                                                                |
| Biological Process | GO:0002440 | production of molecular mediator of immune response                            | 41/2279 | 306/18866 | 0.2616147 | 0.5715339 | 0.5171442 | 41 | ELANE/PRKCZ/IGLV3-10/GALNT2/IL10/TRDV2/CD55/SLC11A1/TNFRSF1B/NLRP3/IL1R1/CCR2/TNF/TRAF2/TNFSF13B/TLR9/SPON2/CD226/HLA-F/SMAD7/UNG/SCIMP/SPHK2/TGFB1/PHB/SLC7A5/PTPRC/BCL10/IL18RAP/NOD2/POU2F2/TCF3/TP53BP1/IL18R1/TRAF3IP2/CTNBL1/ERCC1/TNFSF13/CD96/PAXIP1/NSD2 |
| Biological Process | GO:0071333 | cellular response to glucose stimulus                                          | 19/2279 | 134/18866 | 0.2624452 | 0.5731226 | 0.5185817 | 19 | NADK/LRP5L/ERN1/ARRB1/GPLD1/IGF1R/PTPRN2/PAX2/ENY2/GHRL/KLF7/FIS1/PIH1D1/PRKCE/CPB2/PCK2/SLC29A1/C2CD2L/PRKAA1                                                                                                                                                    |
| Biological Process | GO:0002043 | blood vessel endothelial cell proliferation involved in sprouting angiogenesis | 9/2279  | 58/18866  | 0.2627038 | 0.5731226 | 0.5185817 | 9  | ITGB1BP1/MIR101-2/THBS1/MIR24-2/MIR27A/MIR23A/BMPER/AGTR1/PPP1R16B                                                                                                                                                                                                |
| Biological Process | GO:0010656 | negative regulation of muscle cell apoptotic process                           | 9/2279  | 58/18866  | 0.2627038 | 0.5731226 | 0.5185817 | 9  | MIR145/MIR199A1/MIR24-2/ILK/NFE2L2/ARRB2/MIR138-2/MIR199A2/DNMT1                                                                                                                                                                                                  |
| Biological Process | GO:0045851 | pH reduction                                                                   | 9/2279  | 58/18866  | 0.2627038 | 0.5731226 | 0.5185817 | 9  | SLC11A1/ATP6V1B2/GRN/BCL2/ATP6V0B/UBE3A/CLN5/ATP6V0C/ATP6V1C1                                                                                                                                                                                                     |
| Biological Process | GO:1902099 | regulation of metaphase/anaphase transition of cell cycle                      | 9/2279  | 58/18866  | 0.2627038 | 0.5731226 | 0.5185817 | 9  | MAD1L1/NSMCE2/CUL3/CDC16/NEK6/RB1/ANAPC7/HECW2/PCID2                                                                                                                                                                                                              |
| Biological Process | GO:1902373 | negative regulation of mRNA catabolic process                                  | 9/2279  | 58/18866  | 0.2627038 | 0.5731226 | 0.5185817 | 9  | SLC11A1/LARP1/PKP1/NBAS/PAIP1/SECISBP2/SYNCRIP/TENT5C/TENT5A                                                                                                                                                                                                      |
| Biological Process | GO:0010611 | regulation of cardiac muscle hypertrophy                                       | 11/2279 | 73/18866  | 0.2631377 | 0.5734826 | 0.5189074 | 11 | CTDP1/MIR145/TNFRSF1B/SMAD3/PRKCA/MIR199A1/TNFRSF1A/PDE9A/MIR199A2/NOTCH1/FOXO1                                                                                                                                                                                   |

|                    |            |                                                                            |         |           |           |           |           |    |                                                                                                                                                                       |
|--------------------|------------|----------------------------------------------------------------------------|---------|-----------|-----------|-----------|-----------|----|-----------------------------------------------------------------------------------------------------------------------------------------------------------------------|
| Biological Process | GO:0051145 | smooth muscle cell differentiation                                         | 11/2279 | 73/18866  | 0.2631377 | 0.5734826 | 0.5189074 | 11 | MIR140/MIR145/NFATC2/NFATC1/EPC1/PDGFB/ENG/NOTCH1/DNMT1/MEF2C/MRTFA                                                                                                   |
| Biological Process | GO:0035305 | negative regulation of dephosphorylation                                   | 16/2279 | 111/18866 | 0.2631398 | 0.5734826 | 0.5189074 | 16 | LMTK2/MGAT5/PPP1R1B/URI1/CABIN1/TNF/CCDC8/GNAI2/ELFN2/PHACTR2/FARP1/SEMA4D/WDR81/PPP1R16B/SPOCD1/PTPA                                                                 |
| Biological Process | GO:0051149 | positive regulation of muscle cell differentiation                         | 16/2279 | 111/18866 | 0.2631398 | 0.5734826 | 0.5189074 | 16 | EHD1/MIR140/MIR145/MAML1/MIR199A1/NFATC2/RBPJ/TGFB1/ENG/ARRB2/BCL2/TCF3/MIR199A2/MEF2C/FLOT1/SCGB3A1                                                                  |
| Biological Process | GO:0060541 | respiratory system development                                             | 28/2279 | 204/18866 | 0.2631706 | 0.5734826 | 0.5189074 | 28 | CTSZ/CREB1/CRISPLD2/CHI3L1/SKI/TNS3/TNF/LOXL3/SFTPD/TGFBR2/CTSH/RBPJ/WNT11/FGFR1/RDH10/RARA/SP3/RARG/GRHL2/YWHAZ/NOTCH1/EPAS1/PDGFRB/SREBF1/ALDH1A2/NODAL/LIF/SLC23A1 |
| Biological Process | GO:0002701 | negative regulation of production of molecular mediator of immune response | 6/2279  | 36/18866  | 0.2638389 | 0.5738859 | 0.5192723 | 6  | IL10/TNF/HLA-F/SMAD7/TGFB1/CD96                                                                                                                                       |
| Biological Process | GO:0003382 | epithelial cell morphogenesis                                              | 6/2279  | 36/18866  | 0.2638389 | 0.5738859 | 0.5192723 | 6  | CCDC88C/SPINT2/GRHL2/RILPL1/NOTCH4/FRMD6                                                                                                                              |
| Biological Process | GO:0018345 | protein palmitoylation                                                     | 6/2279  | 36/18866  | 0.2638389 | 0.5738859 | 0.5192723 | 6  | ZDHHC18/ZDHHC14/ZDHHC2/ZDHHC7/ZDHHC17/ZDHHC1                                                                                                                          |
| Biological Process | GO:0021955 | central nervous system neuron axonogenesis                                 | 6/2279  | 36/18866  | 0.2638389 | 0.5738859 | 0.5192723 | 6  | ZEB2/EPHB3/CDH11/NDEL1/SPTBN4/TSKU                                                                                                                                    |
| Biological Process | GO:0042554 | superoxide anion generation                                                | 6/2279  | 36/18866  | 0.2638389 | 0.5738859 | 0.5192723 | 6  | CD177/FPR2/GNAI2/NCF2/TGFB1/ITGB2                                                                                                                                     |

|                    |            |                                         |         |           |           |           |           |    |                                                                                                                                                                                                                                   |
|--------------------|------------|-----------------------------------------|---------|-----------|-----------|-----------|-----------|----|-----------------------------------------------------------------------------------------------------------------------------------------------------------------------------------------------------------------------------------|
| Biological Process | GO:0060323 | head morphogenesis                      | 6/2279  | 36/18866  | 0.2638389 | 0.5738859 | 0.5192723 | 6  | ARID5B/CRISPLD2/SKI/ANKRD11/ASPH/SSBP3                                                                                                                                                                                            |
| Biological Process | GO:0071108 | protein K48-linked deubiquitination     | 6/2279  | 36/18866  | 0.2638389 | 0.5738859 | 0.5192723 | 6  | TNFAIP3/OTUB2/VCPIP1/OTUB1/CYLD/MINDY1                                                                                                                                                                                            |
| Biological Process | GO:2000310 | regulation of NMDA receptor activity    | 6/2279  | 36/18866  | 0.2638389 | 0.5738859 | 0.5192723 | 6  | CCR2/APP/CRHBP/CNIH2/MAPK8IP2/MEF2C                                                                                                                                                                                               |
| Biological Process | GO:0072073 | kidney epithelium development           | 20/2279 | 142/18866 | 0.2654011 | 0.5769956 | 0.5220861 | 20 | TACSTD2/SMAD3/DLL1/ILK/SMAD7/WNT11/PAX2/FGFR1/RARA/MTSS1/BMPER/WWTR1/CAT/BCL2/NOTCH1/MEF2C/ACAT1/CRLF1/LIF/HOXB7                                                                                                                  |
| Biological Process | GO:0000045 | autophagosome assembly                  | 14/2279 | 96/18866  | 0.2667214 | 0.5769956 | 0.5220861 | 14 | ULK1/PACS2/WIPI2/PIP4K2A/FEZ2/SMURF1/RUFY4/RAB43/ATG14/TBC1D14/VMP1/UBXN2A/NPRL2/STING1                                                                                                                                           |
| Biological Process | GO:0035249 | synaptic transmission, glutamatergic    | 14/2279 | 96/18866  | 0.2667214 | 0.5769956 | 0.5220861 | 14 | CCR2/TNF/DISC1/GRIK4/CNIH2/NF1/NRXN1/MAPK8IP2/NTRK1/P2RX1/MEF2C/SHANK2/GRID1/PRKN                                                                                                                                                 |
| Biological Process | GO:0030323 | respiratory tube development            | 25/2279 | 181/18866 | 0.266992  | 0.5769956 | 0.5220861 | 25 | CTSZ/CREB1/CRISPLD2/CHI3L1/TNS3/TNF/LOXL3/SFTPD/TGFBR2/CTSH/RBPJ/WNT11/FGFR1/RDH10/SP3/GRHL2/YWHAZ/NOTCH1/EPAS1/PDGFRB/SREBF1/ALDH1A2/NODAL/LIF/SLC23A1                                                                           |
| Biological Process | GO:0031503 | protein-containing complex localization | 39/2279 | 291/18866 | 0.2673704 | 0.5769956 | 0.5220861 | 39 | PRKCZ/NXF1/FIP1L1/CPSF3/SETD2/RAE1/TNPO1/DNM2/NACC2/SMG7/SMAD7/WASL/PABPN1/ENY2/CLUAP1/CNIH2/NUP93/NUMB/ITGB3/SEC13/KIF5C/SMG6/IFT140/GSG1L/DNM1/KLHL21/TTC21B/DNM3/KIFAP3/EP515/HHEX/RBM15B/AP3D1/MX1/NOL6/CEP72/CPSF4/EZR/PCID2 |
| Biological Process | GO:0001958 | endochondral ossification               | 5/2279  | 29/18866  | 0.2685266 | 0.5769956 | 0.5220861 | 5  | CSGALNACT1/MEF2D/ALPL/RUNX2/MEF2C                                                                                                                                                                                                 |

|                    |            |                                                         |        |          |           |           |           |   |                                              |
|--------------------|------------|---------------------------------------------------------|--------|----------|-----------|-----------|-----------|---|----------------------------------------------|
| Biological Process | GO:007020  | microtubule nucleation                                  | 5/2279 | 29/18866 | 0.2685266 | 0.5769956 | 0.5220861 | 5 | DCTN1/CSNK1D/NDE1/TUBGCP2/NDEL1              |
| Biological Process | GO:0019048 | modulation by virus of host process                     | 5/2279 | 29/18866 | 0.2685266 | 0.5769956 | 0.5220861 | 5 | RXRA/HIPK2/PABPN1/BCL2L1/CPSF4               |
| Biological Process | GO:0036075 | replacement ossification                                | 5/2279 | 29/18866 | 0.2685266 | 0.5769956 | 0.5220861 | 5 | CSGALNACT1/MEF2D/ALPL/RUNX2/MEF2C            |
| Biological Process | GO:0048261 | negative regulation of receptor-mediated endocytosis    | 5/2279 | 29/18866 | 0.2685266 | 0.5769956 | 0.5220861 | 5 | MIR199A1/ANKRD13B/ANKRD13D/ANKRD13A/MIR199A2 |
| Biological Process | GO:0048873 | homeostasis of number of cells within a tissue          | 5/2279 | 29/18866 | 0.2685266 | 0.5769956 | 0.5220861 | 5 | CCR2/ADD1/BCL2/NOTCH1/F2R                    |
| Biological Process | GO:0050690 | regulation of defense response to virus by virus        | 5/2279 | 29/18866 | 0.2685266 | 0.5769956 | 0.5220861 | 5 | AP2A1/ELMO1/LCK/AP1B1/DOCK2                  |
| Biological Process | GO:0061099 | negative regulation of protein tyrosine kinase activity | 5/2279 | 29/18866 | 0.2685266 | 0.5769956 | 0.5220861 | 5 | SH3BP5L/SH3BP5/DUSP22/PTPRC/GGNBP2           |
| Biological Process | GO:0070076 | histone lysine demethylation                            | 5/2279 | 29/18866 | 0.2685266 | 0.5769956 | 0.5220861 | 5 | KDM4B/KDM2A/KDM1B/KDM4C/KDM7A                |
| Biological Process | GO:0071624 | positive regulation of granulocyte chemotaxis           | 5/2279 | 29/18866 | 0.2685266 | 0.5769956 | 0.5220861 | 5 | C3AR1/CAMK1D/DAPK2/DNM1L/DYSF                |

|                    |            |                                                             |        |          |           |           |           |   |                                   |
|--------------------|------------|-------------------------------------------------------------|--------|----------|-----------|-----------|-----------|---|-----------------------------------|
| Biological Process | GO:0090659 | walking behavior                                            | 5/2279 | 29/18866 | 0.2685266 | 0.5769956 | 0.5220861 | 5 | HIPK2/SCN1A/ARRB2/NPC1/SPTBN4     |
| Biological Process | GO:0150117 | positive regulation of cell-substrate junction organization | 5/2279 | 29/18866 | 0.2685266 | 0.5769956 | 0.5220861 | 5 | ITGB1BP1/SMAD3/PTPRJ/IQSEC1/DUSP3 |
| Biological Process | GO:0001829 | trophoblast cell differentiation                            | 3/2279 | 15/18866 | 0.2687921 | 0.5769956 | 0.5220861 | 3 | CUL3/SP3/NODAL                    |
| Biological Process | GO:0006000 | fructose metabolic process                                  | 3/2279 | 15/18866 | 0.2687921 | 0.5769956 | 0.5220861 | 3 | PFKFB4/GLYCTK/PFKFB3              |
| Biological Process | GO:0006646 | phosphatidylethanolamine biosynthetic process               | 3/2279 | 15/18866 | 0.2687921 | 0.5769956 | 0.5220861 | 3 | CHKB/LPIN1/ETNK2                  |
| Biological Process | GO:0009130 | pyrimidine nucleoside monophosphate biosynthetic process    | 3/2279 | 15/18866 | 0.2687921 | 0.5769956 | 0.5220861 | 3 | UCK2/DCTD/DHODH                   |
| Biological Process | GO:0023035 | CD40 signaling pathway                                      | 3/2279 | 15/18866 | 0.2687921 | 0.5769956 | 0.5220861 | 3 | TNFAIP3/PHB/FANCA                 |
| Biological Process | GO:0032486 | Rap protein signal transduction                             | 3/2279 | 15/18866 | 0.2687921 | 0.5769956 | 0.5220861 | 3 | TIMP2/RAP1B/RAPGEF2               |
| Biological Process | GO:0033540 | fatty acid beta-oxidation using acyl-CoA oxidase            | 3/2279 | 15/18866 | 0.2687921 | 0.5769956 | 0.5220861 | 3 | AMACR/ACOXL/ACOX2                 |



|                    |            |                                                                                       |        |          |           |           |           |   |                       |
|--------------------|------------|---------------------------------------------------------------------------------------|--------|----------|-----------|-----------|-----------|---|-----------------------|
| Biological Process | GO:0033689 | negative regulation of osteoblast proliferation                                       | 3/2279 | 15/18866 | 0.2687921 | 0.5769956 | 0.5220861 | 3 | SMAD3/MIR138-2/BCL2   |
| Biological Process | GO:0034111 | negative regulation of homotypic cell-cell adhesion                                   | 3/2279 | 15/18866 | 0.2687921 | 0.5769956 | 0.5220861 | 3 | CD9/UBASH3B/CCM2L     |
| Biological Process | GO:0036376 | sodium ion export across plasma membrane                                              | 3/2279 | 15/18866 | 0.2687921 | 0.5769956 | 0.5220861 | 3 | FXVD2/FXVD1/SLC8A1    |
| Biological Process | GO:0042559 | pteridine-containing compound biosynthetic process                                    | 3/2279 | 15/18866 | 0.2687921 | 0.5769956 | 0.5220861 | 3 | MTHFD1L/MTHFS/MTHFD1  |
| Biological Process | GO:0043101 | purine-containing compound salvage                                                    | 3/2279 | 15/18866 | 0.2687921 | 0.5769956 | 0.5220861 | 3 | AMPD3/PNP/GMPR2       |
| Biological Process | GO:0043517 | positive regulation of DNA damage response, signal transduction by p53 class mediator | 3/2279 | 15/18866 | 0.2687921 | 0.5769956 | 0.5220861 | 3 | SPRED2/ZNF385A/ANKRD1 |
| Biological Process | GO:0044406 | adhesion of symbiont to host                                                          | 3/2279 | 15/18866 | 0.2687921 | 0.5769956 | 0.5220861 | 3 | SFTPD/LTF/NECTIN1     |
| Biological Process | GO:0044849 | estrous cycle                                                                         | 3/2279 | 15/18866 | 0.2687921 | 0.5769956 | 0.5220861 | 3 | NCOR2/NCOA1/ETS1      |
| Biological Process | GO:0048070 | regulation of developmental pigmentation                                              | 3/2279 | 15/18866 | 0.2687921 | 0.5769956 | 0.5220861 | 3 | ZEB2/GNA11/BCL2       |

|                    |            |                                                                |        |          |           |           |           |   |                     |
|--------------------|------------|----------------------------------------------------------------|--------|----------|-----------|-----------|-----------|---|---------------------|
| Biological Process | GO:0048308 | organelle inheritance                                          | 3/2279 | 15/18866 | 0.2687921 | 0.5769956 | 0.5220861 | 3 | STX5/VCPIP1/YWHAZ   |
| Biological Process | GO:0048313 | Golgi inheritance                                              | 3/2279 | 15/18866 | 0.2687921 | 0.5769956 | 0.5220861 | 3 | STX5/VCPIP1/YWHAZ   |
| Biological Process | GO:0048368 | lateral mesoderm development                                   | 3/2279 | 15/18866 | 0.2687921 | 0.5769956 | 0.5220861 | 3 | FGFR1/TEAD2/NODAL   |
| Biological Process | GO:0050746 | regulation of lipoprotein metabolic process                    | 3/2279 | 15/18866 | 0.2687921 | 0.5769956 | 0.5220861 | 3 | ITGB3/SVIP/ANGPTL8  |
| Biological Process | GO:0051044 | positive regulation of membrane protein ectodomain proteolysis | 3/2279 | 15/18866 | 0.2687921 | 0.5769956 | 0.5220861 | 3 | TNFRSF1B/GLPD1/TNF  |
| Biological Process | GO:0051315 | attachment of mitotic spindle microtubules to kinetochore      | 3/2279 | 15/18866 | 0.2687921 | 0.5769956 | 0.5220861 | 3 | MAD1L1/CHAMP1/MIS12 |
| Biological Process | GO:0051589 | negative regulation of neurotransmitter transport              | 3/2279 | 15/18866 | 0.2687921 | 0.5769956 | 0.5220861 | 3 | RAP1B/NF1/PRKN      |
| Biological Process | GO:0055057 | neuroblast division                                            | 3/2279 | 15/18866 | 0.2687921 | 0.5769956 | 0.5220861 | 3 | FGFR1/NUMB/ARHGEF2  |
| Biological Process | GO:0060099 | regulation of phagocytosis, engulfment                         | 3/2279 | 15/18866 | 0.2687921 | 0.5769956 | 0.5220861 | 3 | PPARG/RAB31/ANO6    |

|                    |            |                                                           |        |          |           |           |           |   |                      |
|--------------------|------------|-----------------------------------------------------------|--------|----------|-----------|-----------|-----------|---|----------------------|
| Biological Process | GO:0060253 | negative regulation of glial cell proliferation           | 3/2279 | 15/18866 | 0.2687921 | 0.5769956 | 0.5220861 | 3 | SKI/NOTCH1/CERS2     |
| Biological Process | GO:0060841 | venous blood vessel development                           | 3/2279 | 15/18866 | 0.2687921 | 0.5769956 | 0.5220861 | 3 | CCM2/ENG/NOTCH1      |
| Biological Process | GO:0070365 | hepatocyte differentiation                                | 3/2279 | 15/18866 | 0.2687921 | 0.5769956 | 0.5220861 | 3 | E2F7/TAF10/PCK2      |
| Biological Process | GO:0070571 | negative regulation of neuron projection regeneration     | 3/2279 | 15/18866 | 0.2687921 | 0.5769956 | 0.5220861 | 3 | KREMEN1/CERS2/INPP5F |
| Biological Process | GO:0070885 | negative regulation of calcineurin-NFAT signaling cascade | 3/2279 | 15/18866 | 0.2687921 | 0.5769956 | 0.5220861 | 3 | RCAN1/DYRK2/FHL2     |
| Biological Process | GO:0071474 | cellular hyperosmotic response                            | 3/2279 | 15/18866 | 0.2687921 | 0.5769956 | 0.5220861 | 3 | AQP1/ARHGEF2/SLC2A1  |
| Biological Process | GO:0072567 | chemokine (C-X-C motif) ligand 2 production               | 3/2279 | 15/18866 | 0.2687921 | 0.5769956 | 0.5220861 | 3 | FOXP1/TNF/MBP        |
| Biological Process | GO:0099171 | presynaptic modulation of chemical synaptic transmission  | 3/2279 | 15/18866 | 0.2687921 | 0.5769956 | 0.5220861 | 3 | GIT1/PLEKHG5/PRKCB   |
| Biological Process | GO:0099188 | postsynaptic cytoskeleton organization                    | 3/2279 | 15/18866 | 0.2687921 | 0.5769956 | 0.5220861 | 3 | NOS1AP/ACTG1/DBNL    |

|                    |            |                                                                                      |         |          |           |           |           |    |                                                                       |
|--------------------|------------|--------------------------------------------------------------------------------------|---------|----------|-----------|-----------|-----------|----|-----------------------------------------------------------------------|
| Biological Process | GO:0106057 | negative regulation of calcineurin-mediated signaling                                | 3/2279  | 15/18866 | 0.2687921 | 0.5769956 | 0.5220861 | 3  | RCAN1/DYRK2/FHL2                                                      |
| Biological Process | GO:1903960 | negative regulation of anion transmembrane transport                                 | 3/2279  | 15/18866 | 0.2687921 | 0.5769956 | 0.5220861 | 3  | THBS1/SLC43A2/SLC43A1                                                 |
| Biological Process | GO:1904923 | regulation of autophagy of mitochondrion in response to mitochondrial depolarization | 3/2279  | 15/18866 | 0.2687921 | 0.5769956 | 0.5220861 | 3  | SMURF1/HK2/PRKN                                                       |
| Biological Process | GO:1905065 | positive regulation of vascular associated smooth muscle cell differentiation        | 3/2279  | 15/18866 | 0.2687921 | 0.5769956 | 0.5220861 | 3  | MIR140/MIR145/ENG                                                     |
| Biological Process | GO:2000341 | regulation of chemokine (C-X-C motif) ligand 2 production                            | 3/2279  | 15/18866 | 0.2687921 | 0.5769956 | 0.5220861 | 3  | FOXP1/TNF/MBP                                                         |
| Biological Process | GO:2001044 | regulation of integrin-mediated signaling pathway                                    | 3/2279  | 15/18866 | 0.2687921 | 0.5769956 | 0.5220861 | 3  | CD177/ITGB1BP1/LOXL3                                                  |
| Biological Process | GO:0034644 | cellular response to UV                                                              | 12/2279 | 81/18866 | 0.2695793 | 0.5769956 | 0.5220861 | 12 | MFAP4/PIK3R1/BMF/CDC25A/AQP1/CREBBP/RHNO1/NEDD4/ERCC1/CRIP1/POLD3/XPA |
| Biological Process | GO:0050829 | defense response to Gram-negative bacterium                                          | 12/2279 | 81/18866 | 0.2695793 | 0.5769956 | 0.5220861 | 12 | DEFA4/AZU1/ELANE/CTSG/LYPD8/RNASE3/SLC11A1/TLR9/DEFB1/IL6R/MPEG1/LTF  |
| Biological Process | GO:0021545 | cranial nerve development                                                            | 8/2279  | 51/18866 | 0.2701669 | 0.5769956 | 0.5220861 | 8  | NRP2/PHOX2A/DRGX/ATP8B1/PAX2/NTRK1/SLC1A3/HES3                        |

|                    |            |                                                                                              |         |           |           |           |           |    |                                                                                                              |
|--------------------|------------|----------------------------------------------------------------------------------------------|---------|-----------|-----------|-----------|-----------|----|--------------------------------------------------------------------------------------------------------------|
| Biological Process | GO:0035176 | social behavior                                                                              | 8/2279  | 51/18866  | 0.2701669 | 0.5769956 | 0.5220861 | 8  | ATXN1/NRXN1/NRXN2/MAPK8IP2/SHANK2/CHD8/GRID1/CX3CR1                                                          |
| Biological Process | GO:0038084 | vascular endothelial growth factor signaling pathway                                         | 8/2279  | 51/18866  | 0.2701669 | 0.5769956 | 0.5220861 | 8  | NRP2/MIR199A1/DLL1/FLT1/MIR199A2/MYO1C/PDGFRB/ADGRA2                                                         |
| Biological Process | GO:0046473 | phosphatidic acid metabolic process                                                          | 8/2279  | 51/18866  | 0.2701669 | 0.5769956 | 0.5220861 | 8  | LPCAT1/PLD1/ACP6/DGKQ/DGKA/DGKD/ABHD5/AGPAT5                                                                 |
| Biological Process | GO:0050435 | amyloid-beta metabolic process                                                               | 8/2279  | 51/18866  | 0.2701669 | 0.5769956 | 0.5220861 | 8  | SORL1/TNF/ABCG1/MGAT3/BIN1/APP/CLU/RELA                                                                      |
| Biological Process | GO:0072523 | purine-containing compound catabolic process                                                 | 8/2279  | 51/18866  | 0.2701669 | 0.5769956 | 0.5220861 | 8  | PDE4D/AMPD3/NUDT3/ACOT7/PDE9A/PNP/ACAT1/AOX1                                                                 |
| Biological Process | GO:0032606 | type I interferon production                                                                 | 18/2279 | 127/18866 | 0.2703251 | 0.5769956 | 0.5220861 | 18 | IL10/TRIM38/IRF5/SETD2/TNFAIP3/POLR2F/TLR9/TRAIIP/CRCP/NLRC5/CREBBP/DDX41/CYLD/RELA/FLOT1/HERC5/STING1/ILRUN |
| Biological Process | GO:0002562 | somatic diversification of immune receptors via germline recombination within a single locus | 10/2279 | 66/18866  | 0.2711275 | 0.5769956 | 0.5220861 | 10 | IL10/UNG/TGFB1/PTPRC/TCF3/TP53BP1/ERCC1/TNFSF13/PAXIP1/NSD2                                                  |
| Biological Process | GO:0016444 | somatic cell DNA recombination                                                               | 10/2279 | 66/18866  | 0.2711275 | 0.5769956 | 0.5220861 | 10 | IL10/UNG/TGFB1/PTPRC/TCF3/TP53BP1/ERCC1/TNFSF13/PAXIP1/NSD2                                                  |
| Biological Process | GO:0042490 | mechanoreceptor differentiation                                                              | 10/2279 | 66/18866  | 0.2711275 | 0.5769956 | 0.5220861 | 10 | CDH23/SLC44A4/ATP8B1/DLL1/RBPJ/FGFR1/NTRK1/NOTCH1/TMC1/NTF4                                                  |

|                    |            |                                                              |         |          |           |           |           |    |                                                                   |
|--------------------|------------|--------------------------------------------------------------|---------|----------|-----------|-----------|-----------|----|-------------------------------------------------------------------|
| Biological Process | GO:0050922 | negative regulation of chemotaxis                            | 10/2279 | 66/18866 | 0.2711275 | 0.5769956 | 0.5220861 | 10 | ELANE/SEMA6B/SEMA4A/PADI2/THBS1/SEMA4B/C5AR2/SEMA4D/NOTCH1/DUSP3  |
| Biological Process | GO:0150116 | regulation of cell-substrate junction organization           | 10/2279 | 66/18866 | 0.2711275 | 0.5769956 | 0.5220861 | 10 | ITGB1BP1/SMAD3/DUSP22/THBS1/PTPRJ/IQSEC1/ACTG1/CORO1C/DUSP3/DAPK3 |
| Biological Process | GO:0006067 | ethanol metabolic process                                    | 4/2279  | 22/18866 | 0.2711794 | 0.5769956 | 0.5220861 | 4  | ALDH2/ACSS1/SULT1A2/ACSS2                                         |
| Biological Process | GO:0007398 | ectoderm development                                         | 4/2279  | 22/18866 | 0.2711794 | 0.5769956 | 0.5220861 | 4  | MIR145/ZBTB17/ZBTB7B/SMURF1                                       |
| Biological Process | GO:0009190 | cyclic nucleotide biosynthetic process                       | 4/2279  | 22/18866 | 0.2711794 | 0.5769956 | 0.5220861 | 4  | ADCY2/ADCY9/ADCY4/NPPC                                            |
| Biological Process | GO:0010560 | positive regulation of glycoprotein biosynthetic process     | 4/2279  | 22/18866 | 0.2711794 | 0.5769956 | 0.5220861 | 4  | TCF7L2/POMT2/PLCB1/PXYLP1                                         |
| Biological Process | GO:0032402 | melanosome transport                                         | 4/2279  | 22/18866 | 0.2711794 | 0.5769956 | 0.5220861 | 4  | RAB27A/CDH3/DCTN2/MYO5A                                           |
| Biological Process | GO:0033005 | positive regulation of mast cell activation                  | 4/2279  | 22/18866 | 0.2711794 | 0.5769956 | 0.5220861 | 4  | GAB2/FGFR/CD226/SPHK2                                             |
| Biological Process | GO:0036120 | cellular response to platelet-derived growth factor stimulus | 4/2279  | 22/18866 | 0.2711794 | 0.5769956 | 0.5220861 | 4  | CREB1/PDGFD/PDGFRB/MARS1                                          |

|                    |            |                                             |        |          |           |           |           |   |                           |
|--------------------|------------|---------------------------------------------|--------|----------|-----------|-----------|-----------|---|---------------------------|
| Biological Process | GO:0042359 | vitamin D metabolic process                 | 4/2279 | 22/18866 | 0.2711794 | 0.5769956 | 0.5220861 | 4 | GFI1/VDR/TNF/FGFR1        |
| Biological Process | GO:0042438 | melanin biosynthetic process                | 4/2279 | 22/18866 | 0.2711794 | 0.5769956 | 0.5220861 | 4 | ZEB2/CDH3/RAPGEF2/MYO5A   |
| Biological Process | GO:0046058 | cAMP metabolic process                      | 4/2279 | 22/18866 | 0.2711794 | 0.5769956 | 0.5220861 | 4 | PDE4D/ADCY2/ADCY9/ADCY4   |
| Biological Process | GO:0050765 | negative regulation of phagocytosis         | 4/2279 | 22/18866 | 0.2711794 | 0.5769956 | 0.5220861 | 4 | PRTN3/SNX3/CSK/DYSF       |
| Biological Process | GO:0052652 | cyclic purine nucleotide metabolic process  | 4/2279 | 22/18866 | 0.2711794 | 0.5769956 | 0.5220861 | 4 | ADCY2/ADCY9/ADCY4/NPPC    |
| Biological Process | GO:0055093 | response to hyperoxia                       | 4/2279 | 22/18866 | 0.2711794 | 0.5769956 | 0.5220861 | 4 | PPARG/CAT/PDGFRB/FOXO1    |
| Biological Process | GO:1901685 | glutathione derivative metabolic process    | 4/2279 | 22/18866 | 0.2711794 | 0.5769956 | 0.5220861 | 4 | GSTM5/MGST2/GSTO1/GSTO2   |
| Biological Process | GO:1901687 | glutathione derivative biosynthetic process | 4/2279 | 22/18866 | 0.2711794 | 0.5769956 | 0.5220861 | 4 | GSTM5/MGST2/GSTO1/GSTO2   |
| Biological Process | GO:1901739 | regulation of myoblast fusion               | 4/2279 | 22/18866 | 0.2711794 | 0.5769956 | 0.5220861 | 4 | EHD1/NFATC2/FLOT1/SCGB3A1 |

|                    |            |                                                                  |         |           |           |           |           |    |                                                                                                   |
|--------------------|------------|------------------------------------------------------------------|---------|-----------|-----------|-----------|-----------|----|---------------------------------------------------------------------------------------------------|
| Biological Process | GO:1901798 | positive regulation of signal transduction by p53 class mediator | 4/2279  | 22/18866  | 0.2711794 | 0.5769956 | 0.5220861 | 4  | SPRED2/ZNF385A/ANKRD1/HEXIM1                                                                      |
| Biological Process | GO:1902884 | positive regulation of response to oxidative stress              | 4/2279  | 22/18866  | 0.2711794 | 0.5769956 | 0.5220861 | 4  | TNF/RIPK1/ACOX2/SIRT3                                                                             |
| Biological Process | GO:2000316 | regulation of T-helper 17 type immune response                   | 4/2279  | 22/18866  | 0.2711794 | 0.5769956 | 0.5220861 | 4  | NLRP3/LOXL3/SMAD7/ZBTB7B                                                                          |
| Biological Process | GO:2000479 | regulation of cAMP-dependent protein kinase activity             | 4/2279  | 22/18866  | 0.2711794 | 0.5769956 | 0.5220861 | 4  | PRKAG2/PRKAR1B/RAPGEF2/HTT                                                                        |
| Biological Process | GO:0000726 | non-recombinational repair                                       | 15/2279 | 104/18866 | 0.2712201 | 0.5769956 | 0.5220861 | 15 | RAD52/KDM2A/UVRAG/SMARCAL1/TP53BP1/ERCC1/SLX4/PARP9/PAXIP1/TFIP11/PAXX/NSD2/CYREN/ABRAXAS1/BABAM2 |
| Biological Process | GO:0002027 | regulation of heart rate                                         | 15/2279 | 104/18866 | 0.2712201 | 0.5769956 | 0.5220861 | 15 | PDE4D/KCNE1/CASQ2/CACNA1C/SLC8A1/GJA5/JUP/BIN1/NOS1AP/SNTA1/KCNQ1/EPAS1/ANK2/SREBF1/SPTBN4        |
| Biological Process | GO:0006637 | acyl-CoA metabolic process                                       | 15/2279 | 104/18866 | 0.2712201 | 0.5769956 | 0.5220861 | 15 | ACSL1/FAR2/ACOT13/OGDH/ACOT7/ACSS1/ACACB/ACSS2/ACACA/ACSF3/HMGCL/ACAT1/HMGCS1/SCD/SLC25A1         |
| Biological Process | GO:0009116 | nucleoside metabolic process                                     | 15/2279 | 104/18866 | 0.2712201 | 0.5769956 | 0.5220861 | 15 | CDA/DPYS/AMPD3/TJP2/MACROD1/TK2/UCK2/UPB1/PNP/GUK1/GMPR2/DHODH/TK1/IMPDH1/ACP3                    |
| Biological Process | GO:0010923 | negative regulation of phosphatase activity                      | 15/2279 | 104/18866 | 0.2712201 | 0.5769956 | 0.5220861 | 15 | LMTK2/MGAT5/PPP1R1B/URI1/CABIN1/TNF/CCDC8/GNAI2/ELFN2/PHACTR2/FARP1/SEMA4D/WDR81/SPOCD1/PTPA      |



|                    |            |                                                                |         |           |           |           |           |    |                                                                                                                                                                                                                                                    |
|--------------------|------------|----------------------------------------------------------------|---------|-----------|-----------|-----------|-----------|----|----------------------------------------------------------------------------------------------------------------------------------------------------------------------------------------------------------------------------------------------------|
| Biological Process | GO:0035383 | thioester metabolic process                                    | 15/2279 | 104/18866 | 0.2712201 | 0.5769956 | 0.5220861 | 15 | ACSL1/FAR2/ACOT13/OGDH/ACOT7/ACSS1/ACACB/ACSS2/ACACA/ACSF3/HMGCL/ACAT1/HMGCS1/SCD/SLC25A1                                                                                                                                                          |
| Biological Process | GO:1901606 | alpha-amino acid catabolic process                             | 15/2279 | 104/18866 | 0.2712201 | 0.5769956 | 0.5220861 | 15 | ACAD8/HAL/HGD/CBS/OGDH/ALDH4A1/FAH/HIBADH/AGXT/HOGA1/MAT1A/HMGCL/CRYM/ACAT1/HNMT                                                                                                                                                                   |
| Biological Process | GO:0003158 | endothelium development                                        | 19/2279 | 135/18866 | 0.273334  | 0.5812324 | 0.5259197 | 19 | PDE4D/FOXP1/TJP2/RAP1B/TNF/GJA5/CCM2/DLL1/RBPJ/TNFRSF1A/RAPGEF2/ENG/ADD1/NOTCH1/S1PR2/NOTCH4/PPP1R16B/EZR/MYADM                                                                                                                                    |
| Biological Process | GO:0042157 | lipoprotein metabolic process                                  | 19/2279 | 135/18866 | 0.273334  | 0.5812324 | 0.5259197 | 19 | OLR1/ZDHHC18/PIGL/ZDHHC14/PIGU/GPLD1/WIPI2/PIGN/CTSD/ZDHHC2/ZDHHC7/ITGB3/ABCA1/ZDHHC17/ZDHHC1/PIGQ/LYPLA2/SVIP/ANGPTL8                                                                                                                             |
| Biological Process | GO:0015718 | monocarboxylic acid transport                                  | 24/2279 | 174/18866 | 0.2746085 | 0.5838119 | 0.5282537 | 24 | PRKAG2/RXRA/PPARG/SLC51A/ACSL1/SLC16A3/SLC10A1/MFSD2A/MAP2K6/ABCC2/THBS1/ATP8B1/NF1/SLCO3A1/NCOA1/ACACB/SLC16A5/ABCC3/SLC16A1/ACACA/SLC2A1/NCOA2/CPT1A/AQP9                                                                                        |
| Biological Process | GO:0043537 | negative regulation of blood vessel endothelial cell migration | 13/2279 | 89/18866  | 0.2750537 | 0.5846275 | 0.5289917 | 13 | PPARG/ITGB1BP1/MIR199A1/TNF/MIR101-2/JUP/THBS1/MIR24-2/TGFB1/VASH1/MIR199A2/NOTCH1/MEF2C                                                                                                                                                           |
| Biological Process | GO:0070646 | protein modification by small protein removal                  | 40/2279 | 300/18866 | 0.2753917 | 0.5852152 | 0.5295234 | 40 | FOXK1/WDR20/NLRP3/SMAD3/TRAF2/TNFAIP3/USP3/USP36/SNX3/RIPK1/OTUB2/TAF10/SMAD7/CDC25A/MBD6/ENY2/COPS5/KDM1B/TNIP1/VCPIP1/PSMF1/ARRB2/COPS3/CCNA1/OTUB1/CLSPN/USP49/PSMB7/USP54/MBD5/USP2/CYLD/RUVBL1/UCHL3/PSMD13/USP35/PRKN/MINDY1/ABRAXAS1/BABAM2 |
| Biological Process | GO:0048762 | mesenchymal cell differentiation                               | 31/2279 | 229/18866 | 0.2757843 | 0.5859183 | 0.5301597 | 31 | SEMA6B/SPRED2/NRP2/SMAD3/LDLRAD4/ANXA6/ZEB2/LOXL3/SEMA4A/RTN4/TGFB2/SEMA4B/RBPJ/TCF7L2/SMAD7/WNT11/PAX2/FGFR1/TGFB1/SEMA4D/RDH10/TGFB11/WWTR1/ENG/BCL2/NOTCH1/CORO1C/GCNT2/MEF2C/NOTCH4/ALDH1A2                                                    |
| Biological Process | GO:0010324 | membrane invagination                                          | 20/2279 | 143/18866 | 0.2760244 | 0.5861662 | 0.530384  | 20 | PPARG/GSN/ELMO1/RHOH/DOCK1/RHOG/RAB31/IGHV6-1/THBS1/MYH9/SNX3/MARCO/RHOBTB2/SMURF1/ABCA1/SNX18/ARHGAP25/ITGB2/ANO6/ARHGAP12                                                                                                                        |

|                    |            |                                                                                   |         |           |           |           |           |    |                                                                                                                                                                                                                                                             |
|--------------------|------------|-----------------------------------------------------------------------------------|---------|-----------|-----------|-----------|-----------|----|-------------------------------------------------------------------------------------------------------------------------------------------------------------------------------------------------------------------------------------------------------------|
| Biological Process | GO:0072006 | nephron development                                                               | 20/2279 | 143/18866 | 0.2760244 | 0.5861662 | 0.530384  | 20 | TACSTD2/ANGPT1/DLL1/ILK/WNT11/PAX2/PDGFD/KIRREL3/MTSS1/WWTR1/IL6R/PDGFB/BCL2/NOTCH1/MEF2C/GPR4/PDGFRB/ACAT1/LIF/HOXB7                                                                                                                                       |
| Biological Process | GO:0001913 | T cell mediated cytotoxicity                                                      | 7/2279  | 44/18866  | 0.2778064 | 0.5892041 | 0.5331328 | 7  | CTSH/RAB27A/HLA-F/RIPK3/PTPRC/FADD/CYRIB                                                                                                                                                                                                                    |
| Biological Process | GO:0006195 | purine nucleotide catabolic process                                               | 7/2279  | 44/18866  | 0.2778064 | 0.5892041 | 0.5331328 | 7  | PDE4D/AMPD3/NUDT3/ACOT7/PDE9A/PNP/ACAT1                                                                                                                                                                                                                     |
| Biological Process | GO:0032620 | interleukin-17 production                                                         | 7/2279  | 44/18866  | 0.2778064 | 0.5892041 | 0.5331328 | 7  | LY9/ZBTB7B/TGFB1/PHB/SLC7A5/NOD2/VSIR                                                                                                                                                                                                                       |
| Biological Process | GO:0032881 | regulation of polysaccharide metabolic process                                    | 7/2279  | 44/18866  | 0.2778064 | 0.5892041 | 0.5331328 | 7  | AP2A1/TGFB1/DYRK2/PDGFB/PPP1CB/ESRRB/RUBCNL                                                                                                                                                                                                                 |
| Biological Process | GO:0045005 | DNA-dependent DNA replication maintenance of fidelity                             | 7/2279  | 44/18866  | 0.2778064 | 0.5892041 | 0.5331328 | 7  | BLM/POLE/BRCA2/RTEL1/EME1/SMARCAL1/FBH1                                                                                                                                                                                                                     |
| Biological Process | GO:0006520 | cellular amino acid metabolic process                                             | 45/2279 | 340/18866 | 0.277827  | 0.5892041 | 0.5331328 | 45 | ACAD8/DPYS/HAL/GADL1/HGD/GGT1/CBS/ODC1/MSRA/COMT/DDC/MTHFS/CARS2/OGDH/ALDH4A1/ENOSF1/FAH/HIBADH/SLC7A7/AGXT/PSMF1/SCLY/UPB1/MTHFD1/ART4/HOGA1/ADO/SLC1A3/BCKDHA/FN3K/PSMB7/MAT1A/HMGCL/GFPT2/CRYM/ADI1/ACAT1/EARS2/ASPG/HNMT/PSMD13/MARS1/GATB/DGLUCY/YARS1 |
| Biological Process | GO:0086003 | cardiac muscle cell contraction                                                   | 11/2279 | 74/18866  | 0.2780703 | 0.5894568 | 0.5333615 | 11 | PDE4D/KCNE1/CACNA1C/GJA5/JUP/BIN1/NOS1AP/SCN1A/SNTA1/KCNQ1/ANK2                                                                                                                                                                                             |
| Biological Process | GO:1903051 | negative regulation of proteolysis involved in cellular protein catabolic process | 11/2279 | 74/18866  | 0.2780703 | 0.5894568 | 0.5333615 | 11 | TRIM39/SUFU/HIPK2/UBAC2/DERL2/CLEC16A/PSMF1/MAP1A/BAG5/SVIP/MARCHF7                                                                                                                                                                                         |

|                    |            |                                                                  |         |           |           |           |           |    |                                                                                                                                                                                                                                   |
|--------------------|------------|------------------------------------------------------------------|---------|-----------|-----------|-----------|-----------|----|-----------------------------------------------------------------------------------------------------------------------------------------------------------------------------------------------------------------------------------|
| Biological Process | GO:0019731 | antibacterial humoral response                                   | 9/2279  | 59/18866  | 0.279531  | 0.5902856 | 0.5341114 | 9  | DEFA4/ELANE/SLPI/CTSG/RNASE3/SFTPD/SPON2/DEFB1/LTF                                                                                                                                                                                |
| Biological Process | GO:0031102 | neuron projection regeneration                                   | 9/2279  | 59/18866  | 0.279531  | 0.5902856 | 0.5341114 | 9  | ULK1/KREMEN1/STK24/JAM3/GRN/BCL2/CERS2/NDEL1/INPP5F                                                                                                                                                                               |
| Biological Process | GO:0042306 | regulation of protein import into nucleus                        | 9/2279  | 59/18866  | 0.279531  | 0.5902856 | 0.5341114 | 9  | ANGPT1/PIK3R1/SMAD3/SUFU/JUP/TGFB1/NF1/CDH1/CABP1                                                                                                                                                                                 |
| Biological Process | GO:0051058 | negative regulation of small GTPase mediated signal transduction | 9/2279  | 59/18866  | 0.279531  | 0.5902856 | 0.5341114 | 9  | TIMP2/KANK1/CUL3/RASA3/SYNGAP1/NF1/ARHGAP25/ARHGAP12/CYRIB                                                                                                                                                                        |
| Biological Process | GO:0051289 | protein homotetramerization                                      | 9/2279  | 59/18866  | 0.279531  | 0.5902856 | 0.5341114 | 9  | TRPM2/ACOT13/CRTC3/ACACB/UPB1/ACACA/MAT1A/ALDH1A2/TK1                                                                                                                                                                             |
| Biological Process | GO:1901799 | negative regulation of proteasomal protein catabolic process     | 9/2279  | 59/18866  | 0.279531  | 0.5902856 | 0.5341114 | 9  | TRIM39/UBAC2/DERL2/CLEC16A/PSMF1/MAP1A/BAG5/SVIP/MARCHF7                                                                                                                                                                          |
| Biological Process | GO:1990823 | response to leukemia inhibitory factor                           | 14/2279 | 97/18866  | 0.2797511 | 0.5902856 | 0.5341114 | 14 | ARID5B/SBNO2/NRP2/SPOCK2/CREB1/PADI2/SMAD7/CTBP2/HK2/RARG/UBXN2A/GFPT2/NR5A2/B3GNT2                                                                                                                                               |
| Biological Process | GO:1990830 | cellular response to leukemia inhibitory factor                  | 14/2279 | 97/18866  | 0.2797511 | 0.5902856 | 0.5341114 | 14 | ARID5B/SBNO2/NRP2/SPOCK2/CREB1/PADI2/SMAD7/CTBP2/HK2/RARG/UBXN2A/GFPT2/NR5A2/B3GNT2                                                                                                                                               |
| Biological Process | GO:0031348 | negative regulation of defense response                          | 36/2279 | 269/18866 | 0.2803268 | 0.5902856 | 0.5341114 | 36 | ELANE/ABR/IL10/TRIM38/PPARG/C1QTNF3/MIR140/MIR145/TNFRSF1B/NLRP3/SMAD3/MEFV/SMPDL3B/TNFAIP3/AOAH/FPR2/HLA-F/TNFAIP6/TNFRSF1A/CXCL17/NR1H2/PGLYRP1/SEC14L1/GHRL/PTPRC/GRN/NLRCS5/BCR/CNR2/ETS1/ARRB2/MIR138-2/RB1/TYRO3/CD96/ILRUN |

|                    |            |                                                                         |         |           |           |           |           |    |                                                                                                                                                                            |
|--------------------|------------|-------------------------------------------------------------------------|---------|-----------|-----------|-----------|-----------|----|----------------------------------------------------------------------------------------------------------------------------------------------------------------------------|
| Biological Process | GO:0035637 | multicellular organismal signaling                                      | 28/2279 | 206/18866 | 0.2808646 | 0.5902856 | 0.5341114 | 28 | PDE4D/KCNE1/CASQ2/ITPR2/FXYD2/CACNA1C/CACNA2D4/FXYD1/SLC8A1/GJA5/ATP2B2/ITPR1/JUP/BIN1/KCNIP1/SCN1A/KCNK6/JAM3/GHRL/ATP2A3/KCNQ1/P2RX1/NPPC/CNTNAP1/ANK2/ASPH/CASQ1/SPTBN4 |
| Biological Process | GO:0046545 | development of primary female sexual characteristics                    | 15/2279 | 105/18866 | 0.283814  | 0.5902856 | 0.5341114 | 15 | ARID5B/BRCA2/ARRB1/EIF2B5/FANCA/BMPR1B/LHFPL2/ARRB2/BCL2/DMC1/SLIT3/UBE3A/CEBPB/BCL2L1/INHBA                                                                               |
| Biological Process | GO:0120193 | tight junction organization                                             | 12/2279 | 82/18866  | 0.2838757 | 0.5902856 | 0.5341114 | 12 | TBCD/RUNX1/TNF/ACTN4/WNT11/PRKCH/ACTG1/GRHL2/PRKCI/MPP7/MYO1C/NPHP4                                                                                                        |
| Biological Process | GO:0003091 | renal water homeostasis                                                 | 6/2279  | 37/18866  | 0.2855032 | 0.5902856 | 0.5341114 | 6  | ADCY2/PRKAR1B/ADCY9/AQP1/ADCY4/AQP3                                                                                                                                        |
| Biological Process | GO:0006921 | cellular component disassembly involved in execution phase of apoptosis | 6/2279  | 37/18866  | 0.2855032 | 0.5902856 | 0.5341114 | 6  | CECR2/PAM16/DEDD2/DFFB/DNASE1L3/BLCAP                                                                                                                                      |
| Biological Process | GO:0010667 | negative regulation of cardiac muscle cell apoptotic process            | 6/2279  | 37/18866  | 0.2855032 | 0.5902856 | 0.5341114 | 6  | MIR145/MIR199A1/MIR24-2/ILK/NFE2L2/MIR199A2                                                                                                                                |
| Biological Process | GO:0032717 | negative regulation of interleukin-8 production                         | 6/2279  | 37/18866  | 0.2855032 | 0.5902856 | 0.5341114 | 6  | ELANE/IL10/ARRB1/TLR9/CD33/BCL3                                                                                                                                            |
| Biological Process | GO:0045070 | positive regulation of viral genome replication                         | 6/2279  | 37/18866  | 0.2855032 | 0.5902856 | 0.5341114 | 6  | TRIM38/SRPK2/CCL5/LARP1/NOTCH1/NR5A2                                                                                                                                       |
| Biological Process | GO:0086010 | membrane depolarization during action potential                         | 6/2279  | 37/18866  | 0.2855032 | 0.5902856 | 0.5341114 | 6  | CACNA1C/YWHAH/SLC8A1/GJA5/SCN1A/ANK2                                                                                                                                       |

|                    |            |                                                                          |         |           |           |           |           |    |                                                                                                                             |
|--------------------|------------|--------------------------------------------------------------------------|---------|-----------|-----------|-----------|-----------|----|-----------------------------------------------------------------------------------------------------------------------------|
| Biological Process | GO:0090050 | positive regulation of cell migration involved in sprouting angiogenesis | 6/2279  | 37/18866  | 0.2855032 | 0.5902856 | 0.5341114 | 6  | MAP3K3/HDAC7/MIR101-2/AKT3/MIR27A/MIR23A                                                                                    |
| Biological Process | GO:0097242 | amyloid-beta clearance                                                   | 6/2279  | 37/18866  | 0.2855032 | 0.5902856 | 0.5341114 | 6  | TNF/CLU/HDAC1/IGF1R/MARCO/ITGB2                                                                                             |
| Biological Process | GO:0010212 | response to ionizing radiation                                           | 20/2279 | 144/18866 | 0.2867974 | 0.5902856 | 0.5341114 | 20 | BLM/SPIDR/BRCA2/DNM2/HUS1/MTA1/PTPRC/BCL2/DMC1/TP53BP1/RHNO1/CHEK2/ERCC1/BCL2L1/PAXIP1/EEF1D/PRKAA1/MAP3K20/ABRAXAS1/BABAM2 |
| Biological Process | GO:0070613 | regulation of protein processing                                         | 10/2279 | 67/18866  | 0.2870703 | 0.5902856 | 0.5341114 | 10 | CTSZ/NLRC4/ENO1/GSN/THBS1/MYH9/F12/NOL3/CPB2/ANGPTL8                                                                        |
| Biological Process | GO:0072678 | T cell migration                                                         | 10/2279 | 67/18866  | 0.2870703 | 0.5902856 | 0.5341114 | 10 | PIK3CD/CCR2/CCL5/APP/DOCK8/RIPK3/CCL20/C10orf99/CCL27/FADD                                                                  |
| Biological Process | GO:0031103 | axon regeneration                                                        | 8/2279  | 52/18866  | 0.2883817 | 0.5902856 | 0.5341114 | 8  | KREMEN1/STK24/JAM3/GRN/BCL2/CERS2/NDEL1/INPP5F                                                                              |
| Biological Process | GO:0038066 | p38MAPK cascade                                                          | 8/2279  | 52/18866  | 0.2883817 | 0.5902856 | 0.5341114 | 8  | MAP3K3/PHLPP1/MIR138-2/PER1/GADD45G/GDF6/CYLD/EZR                                                                           |
| Biological Process | GO:0048260 | positive regulation of receptor-mediated endocytosis                     | 8/2279  | 52/18866  | 0.2883817 | 0.5902856 | 0.5341114 | 8  | AP2A1/ANGPT1/ARRB1/DNM2/CLU/WASL/DGKD/ARRB2                                                                                 |
| Biological Process | GO:0050999 | regulation of nitric-oxide synthase activity                             | 8/2279  | 52/18866  | 0.2883817 | 0.5902856 | 0.5341114 | 8  | DNM2/TNF/NOS1AP/WASL/NOSTRIN/CNR2/MIR138-2/NOSIP                                                                            |

|                    |            |                                                    |         |           |           |           |           |    |                                                                                                                                                                                                                                                                                            |
|--------------------|------------|----------------------------------------------------|---------|-----------|-----------|-----------|-----------|----|--------------------------------------------------------------------------------------------------------------------------------------------------------------------------------------------------------------------------------------------------------------------------------------------|
| Biological Process | GO:0051445 | regulation of meiotic cell cycle                   | 8/2279  | 52/18866  | 0.2883817 | 0.5902856 | 0.5341114 | 8  | CALR/FZR1/CDC25A/OVOL1/PPP2R1A/PLCB1/NPPC/LIF                                                                                                                                                                                                                                              |
| Biological Process | GO:0060425 | lung morphogenesis                                 | 8/2279  | 52/18866  | 0.2883817 | 0.5902856 | 0.5341114 | 8  | CTS2/TNF/TGFBR2/CTSH/RDH10/GRHL2/NODAL/LIF                                                                                                                                                                                                                                                 |
| Biological Process | GO:0043470 | regulation of carbohydrate catabolic process       | 13/2279 | 90/18866  | 0.288787  | 0.5902856 | 0.5341114 | 13 | HDAC4/PRKAG2/PFKFB4/RAE1/CBFA2T3/APP/PGAM1/NUP93/SEC13/PPP1CB/ESRRB/PFKFB3/PRKAA1                                                                                                                                                                                                          |
| Biological Process | GO:0034284 | response to monosaccharide                         | 28/2279 | 207/18866 | 0.2898745 | 0.5902856 | 0.5341114 | 28 | NADK/SLC2A5/LRP5L/ERN1/SLC8A1/ARRB1/GPLD1/EIF2B5/TGFBR2/THBS1/TCF7L2/IGF1R/PTPRN2/PAX2/ENY2/GIPR/GHRL/CAT/KLF7/FIS1/PIH1D1/PRKCE/CPB2/PCK2/SREBF1/SLC29A1/C2CD2L/PRKAA1                                                                                                                    |
| Biological Process | GO:0010906 | regulation of glucose metabolic process            | 17/2279 | 121/18866 | 0.2904488 | 0.5902856 | 0.5341114 | 17 | MAEA/FOXK1/C1QTNF3/GPLD1/PGP/DGKQ/DYRK2/GNB3/ACACB/PPP1CB/ESRRB/FOXO1/NCOA2/SOGA1/PRKN/SDHAF3/RUBCNL                                                                                                                                                                                       |
| Biological Process | GO:0071496 | cellular response to external stimulus             | 43/2279 | 326/18866 | 0.2912925 | 0.5902856 | 0.5341114 | 43 | HDAC4/RPTOR/PRKAG2/PPARG/LCN2/MFSD2A/TNKS/ULK1/VDR/CBS/WIPI2/COMT/EHMT2/TNFRSF1A/WNT11/AQP1/STK24/CLEC16A/SLC1A2/ATG14/PTPRC/NCOA1/BCL10/MAP3K14/NFE2L2/ENG/BCL2/AQP3/DNM1L/GLRX2/USF2/CASP1/CD68/SLC2A1/FOXO1/ANKRD1/SREBF1/EIF4G1/FADD/NPRL2/PRKAA1/MARS1/RIPOR1                         |
| Biological Process | GO:0010038 | response to metal ion                              | 48/2279 | 366/18866 | 0.29237   | 0.5902856 | 0.5341114 | 48 | TRPM2/S100A8/CPNE6/BSG/CALR/GSN/CPNE2/TTN/CASQ2/CREB1/NDRG1/ITPKB/D2HGDH/SLFN14/GPLD1/CPNE5/EIF2B5/ABCC2/SLC11A2/THBS1/APP/FECH/CPNE1/MTF1/CRHBP/AQP1/ADAMTS13/GIPR/CAT/NFE2L2/NPC1/CDH1/ADD1/BCL2/AQP3/SLC39A13/MEF2C/SYT17/NEDD4/ERCC1/CRIP1/ATP7B/ANXA7/SEC31A/SLC41A1/AQP9/PRKAA1/PRKN |
| Biological Process | GO:0002832 | negative regulation of response to biotic stimulus | 14/2279 | 98/18866  | 0.2929815 | 0.5902856 | 0.5341114 | 14 | TRIM38/PPARG/TNFAIP3/HLA-F/NR1H2/SEC14L1/GRN/NLRCS/ARRB2/LTF/TRIB1/TYRO3/CD96/ILRUN                                                                                                                                                                                                        |
| Biological Process | GO:0006835 | dicarboxylic acid transport                        | 14/2279 | 98/18866  | 0.2929815 | 0.5902856 | 0.5341114 | 14 | SLC1A5/FOLR3/ABCC2/LRRC8C/PPFIA1/SLC19A1/SLC26A1/NF1/SLC1A2/AGXT/SLC1A6/PER2/SLC1A3/SLC13A5                                                                                                                                                                                                |

|                    |            |                                                                                   |         |          |           |           |           |    |                                                                                         |
|--------------------|------------|-----------------------------------------------------------------------------------|---------|----------|-----------|-----------|-----------|----|-----------------------------------------------------------------------------------------|
| Biological Process | GO:0042158 | lipoprotein biosynthetic process                                                  | 14/2279 | 98/18866 | 0.2929815 | 0.5902856 | 0.5341114 | 14 | ZDHHC18/PIGL/ZDHHC14/PIGU/GLPD1/WIPI2/PIGN/ZDHHC2/ZDHHC7/ABCA1/ZDHHC17/ZDHHC1/PIGQ/SVIP |
| Biological Process | GO:0000303 | response to superoxide                                                            | 5/2279  | 30/18866 | 0.2929867 | 0.5902856 | 0.5341114 | 5  | MPO/TNF/NFE2L2/GLRX2/SIRT3                                                              |
| Biological Process | GO:0006362 | transcription elongation from RNA polymerase I promoter                           | 5/2279  | 30/18866 | 0.2929867 | 0.5902856 | 0.5341114 | 5  | TAF1C/POLR2F/CCNH/TAF1D/ERCC2                                                           |
| Biological Process | GO:0010586 | miRNA metabolic process                                                           | 5/2279  | 30/18866 | 0.2929867 | 0.5902856 | 0.5341114 | 5  | AGO1/AGO2/DIS3L2/SND1/RELA                                                              |
| Biological Process | GO:0010758 | regulation of macrophage chemotaxis                                               | 5/2279  | 30/18866 | 0.2929867 | 0.5902856 | 0.5341114 | 5  | C3AR1/CCL5/CSF1R/THBS1/CXCL17                                                           |
| Biological Process | GO:0016577 | histone demethylation                                                             | 5/2279  | 30/18866 | 0.2929867 | 0.5902856 | 0.5341114 | 5  | KDM4B/KDM2A/KDM1B/KDM4C/KDM7A                                                           |
| Biological Process | GO:0019934 | cGMP-mediated signaling                                                           | 5/2279  | 30/18866 | 0.2929867 | 0.5902856 | 0.5341114 | 5  | THBS1/AQP1/PDE9A/NPPC/IRAG1                                                             |
| Biological Process | GO:0030511 | positive regulation of transforming growth factor beta receptor signaling pathway | 5/2279  | 30/18866 | 0.2929867 | 0.5902856 | 0.5341114 | 5  | LRG1/HIPK2/THBS1/TGFB11/CREBBP                                                          |
| Biological Process | GO:0033137 | negative regulation of peptidyl-serine phosphorylation                            | 5/2279  | 30/18866 | 0.2929867 | 0.5902856 | 0.5341114 | 5  | PDE4D/NCK2/SMAD7/GGNBP2/INPP5F                                                          |

|                    |            |                                                                                             |         |           |           |           |           |    |                                                                                                                                                                                                            |
|--------------------|------------|---------------------------------------------------------------------------------------------|---------|-----------|-----------|-----------|-----------|----|------------------------------------------------------------------------------------------------------------------------------------------------------------------------------------------------------------|
| Biological Process | GO:0044788 | modulation by host of viral process                                                         | 5/2279  | 30/18866  | 0.2929867 | 0.5902856 | 0.5341114 | 5  | CSF1R/PC/PHB/LTF/PRKN                                                                                                                                                                                      |
| Biological Process | GO:0060055 | angiogenesis involved in wound healing                                                      | 5/2279  | 30/18866  | 0.2929867 | 0.5902856 | 0.5341114 | 5  | TNF/TNFAIP3/ITGB3/ETS1/GPR4                                                                                                                                                                                |
| Biological Process | GO:1900746 | regulation of vascular endothelial growth factor signaling pathway                          | 5/2279  | 30/18866  | 0.2929867 | 0.5902856 | 0.5341114 | 5  | MIR199A1/DLL1/MIR199A2/MYO1C/ADGRA2                                                                                                                                                                        |
| Biological Process | GO:1902186 | regulation of viral release from host cell                                                  | 5/2279  | 30/18866  | 0.2929867 | 0.5902856 | 0.5341114 | 5  | TRIM27/TRIM8/PC/TRIM5/TRIM26                                                                                                                                                                               |
| Biological Process | GO:1903846 | positive regulation of cellular response to transforming growth factor beta stimulus        | 5/2279  | 30/18866  | 0.2929867 | 0.5902856 | 0.5341114 | 5  | LRG1/HIPK2/THBS1/TGFB11/CREBBP                                                                                                                                                                             |
| Biological Process | GO:1990126 | retrograde transport, endosome to plasma membrane                                           | 5/2279  | 30/18866  | 0.2929867 | 0.5902856 | 0.5341114 | 5  | SNX27/ZDHHC2/AKAP5/MICALL1/VPS35L                                                                                                                                                                          |
| Biological Process | GO:0006353 | DNA-templated transcription, termination                                                    | 11/2279 | 75/18866  | 0.2932522 | 0.5902856 | 0.5341114 | 11 | TAF1C/FIP1L1/CPSF3/SNRPD3/POLR2F/PABPN1/CCNH/SCAF8/TAF1D/CPSF4/ERCC2                                                                                                                                       |
| Biological Process | GO:0086001 | cardiac muscle cell action potential                                                        | 11/2279 | 75/18866  | 0.2932522 | 0.5902856 | 0.5341114 | 11 | KCNE1/CACNA1C/SLC8A1/GJA5/JUP/BIN1/NOS1AP/SCN1A/SNTA1/KCNQ1/ANK2                                                                                                                                           |
| Biological Process | GO:0007187 | G protein-coupled receptor signaling pathway, coupled to cyclic nucleotide second messenger | 35/2279 | 263/18866 | 0.2956013 | 0.5902856 | 0.5341114 | 35 | PDE4D/ADCY2/AKAP13/ADCY9/PRKCA/FPR2/FPR1/GNAZ/GNAI2/MRAP/AKAP5/GNAT2/MARCO/RAPGEF2/HRH1/GRK5/GIPR/GNA11/CHRM2/ABCA1/PALM/CNR2/ADCY4/S1PR2/GNG2/GABBR1/GNAO1/LPAR2/GNA12/S1PR4/GPR4/VIPR2/NPY/ADGRG3/ADGRE3 |



|                    |            |                                                                |         |           |           |           |           |    |                                                                                          |
|--------------------|------------|----------------------------------------------------------------|---------|-----------|-----------|-----------|-----------|----|------------------------------------------------------------------------------------------|
| Biological Process | GO:0032414 | positive regulation of ion transmembrane transporter activity  | 15/2279 | 106/18866 | 0.2965918 | 0.5902856 | 0.5341114 | 15 | CCR2/DNM2/TESC/NOS1AP/ACTN4/P2RY6/HTR3A/HTT/GSTO1/ANK2/PDZK1/CASQ1/FGF14/STIMATE/CRACR2A |
| Biological Process | GO:0071868 | cellular response to monoamine stimulus                        | 15/2279 | 106/18866 | 0.2965918 | 0.5902856 | 0.5341114 | 15 | PDE4D/KLF16/DNM2/APP/HRH1/HTR3A/GNA11/CHRM2/PALM/KCNQ1/ARRB2/GNG2/GNAO1/DTNBP1/PRKN      |
| Biological Process | GO:0071870 | cellular response to catecholamine stimulus                    | 15/2279 | 106/18866 | 0.2965918 | 0.5902856 | 0.5341114 | 15 | PDE4D/KLF16/DNM2/APP/HRH1/HTR3A/GNA11/CHRM2/PALM/KCNQ1/ARRB2/GNG2/GNAO1/DTNBP1/PRKN      |
| Biological Process | GO:0006949 | syncytium formation                                            | 9/2279  | 60/18866  | 0.2966481 | 0.5902856 | 0.5341114 | 9  | EHD1/SBNO2/CD9/TANC1/NFATC2/MYH9/ERCC1/FLOT1/SCGB3A1                                     |
| Biological Process | GO:0043966 | histone H3 acetylation                                         | 9/2279  | 60/18866  | 0.2966481 | 0.5902856 | 0.5341114 | 9  | BRCA2/BRD1/TAF10/SPHK2/PER1/PIH1D1/KAT7/ING5/LIF                                         |
| Biological Process | GO:0002639 | positive regulation of immunoglobulin production               | 7/2279  | 45/18866  | 0.2977097 | 0.5902856 | 0.5341114 | 7  | TLR9/TGFB1/PTPRC/TP53BP1/TNFSF13/PAXIP1/NSD2                                             |
| Biological Process | GO:0006775 | fat-soluble vitamin metabolic process                          | 7/2279  | 45/18866  | 0.2977097 | 0.5902856 | 0.5341114 | 7  | GFI1/VDR/TNF/PLTP/FGFR1/CYP4F3/ALDH1A2                                                   |
| Biological Process | GO:0007520 | myoblast fusion                                                | 7/2279  | 45/18866  | 0.2977097 | 0.5902856 | 0.5341114 | 7  | EHD1/CD9/TANC1/NFATC2/MYH9/FLOT1/SCGB3A1                                                 |
| Biological Process | GO:0010677 | negative regulation of cellular carbohydrate metabolic process | 7/2279  | 45/18866  | 0.2977097 | 0.5902856 | 0.5341114 | 7  | MAEA/HDAC4/C1QTNF3/CBFA2T3/PGP/SOGA1/PRKN                                                |

|                    |            |                                                             |         |           |           |           |           |    |                                                                                                                        |
|--------------------|------------|-------------------------------------------------------------|---------|-----------|-----------|-----------|-----------|----|------------------------------------------------------------------------------------------------------------------------|
| Biological Process | GO:0031018 | endocrine pancreas development                              | 7/2279  | 45/18866  | 0.2977097 | 0.5902856 | 0.5341114 | 7  | RHEB/RFX3/DLL1/GIPR/IL6R/ARNTL/FOXO1                                                                                   |
| Biological Process | GO:0034122 | negative regulation of toll-like receptor signaling pathway | 7/2279  | 45/18866  | 0.2977097 | 0.5902856 | 0.5341114 | 7  | GRAMD4/MIR140/SMPDL3B/TNFAIP3/TLR9/ARRB2/TYRO3                                                                         |
| Biological Process | GO:0035315 | hair cell differentiation                                   | 7/2279  | 45/18866  | 0.2977097 | 0.5902856 | 0.5341114 | 7  | SLC44A4/DLL1/RBPJ/FGFR1/NOTCH1/TMC1/ERCC2                                                                              |
| Biological Process | GO:0045429 | positive regulation of nitric oxide biosynthetic process    | 7/2279  | 45/18866  | 0.2977097 | 0.5902856 | 0.5341114 | 7  | SMAD3/DNM2/TNF/NOS1AP/CLU/HBB/ITGB2                                                                                    |
| Biological Process | GO:0045911 | positive regulation of DNA recombination                    | 7/2279  | 45/18866  | 0.2977097 | 0.5902856 | 0.5341114 | 7  | TGFB1/PTPRC/TP53BP1/TNFSF13/ERCC2/PAXIP1/NSD2                                                                          |
| Biological Process | GO:0051204 | protein insertion into mitochondrial membrane               | 7/2279  | 45/18866  | 0.2977097 | 0.5902856 | 0.5341114 | 7  | TFDP1/YWHAH/BMF/YWHAZ/BCL2/TP53BP2/YWHAQ                                                                               |
| Biological Process | GO:0070316 | regulation of G0 to G1 transition                           | 7/2279  | 45/18866  | 0.2977097 | 0.5902856 | 0.5341114 | 7  | TFDP1/MGA/EHMT2/EPC1/PHC3/E2F6/RHNO1                                                                                   |
| Biological Process | GO:0007612 | learning                                                    | 20/2279 | 145/18866 | 0.2977104 | 0.5902856 | 0.5341114 | 20 | CREB1/PPP1R1B/TANC1/ATP8A1/ATXN1/COMT/APP/SYNGAP1/HRH1/NF1/NRXN1/HTT/GMFB/MEIS2/NRXN2/MAPK8IP2/MAP1A/SHANK2/SYNPO/PRKN |
| Biological Process | GO:0000459 | exonucleolytic trimming involved in rRNA processing         | 2/2279  | 9/18866   | 0.297936  | 0.5902856 | 0.5341114 | 2  | EXOSC2/ERI3                                                                                                            |

|                    |            |                                                                                                                                  |        |         |          |           |           |   |                   |
|--------------------|------------|----------------------------------------------------------------------------------------------------------------------------------|--------|---------|----------|-----------|-----------|---|-------------------|
| Biological Process | GO:0000467 | exonucleolytic trimming to generate mature 3'-end of 5.8S rRNA from tricistronic rRNA transcript (SSU-rRNA, 5.8S rRNA, LSU-rRNA) | 2/2279 | 9/18866 | 0.297936 | 0.5902856 | 0.5341114 | 2 | EXOSC2/ERI3       |
| Biological Process | GO:0000492 | box C/D snoRNP assembly                                                                                                          | 2/2279 | 9/18866 | 0.297936 | 0.5902856 | 0.5341114 | 2 | PIH1D1/RUVBL1     |
| Biological Process | GO:0001188 | RNA polymerase I preinitiation complex assembly                                                                                  | 2/2279 | 9/18866 | 0.297936 | 0.5902856 | 0.5341114 | 2 | TAF1C/PIH1D1      |
| Biological Process | GO:0001514 | selenocysteine incorporation                                                                                                     | 2/2279 | 9/18866 | 0.297936 | 0.5902856 | 0.5341114 | 2 | TRNAU1AP/SECISBP2 |
| Biological Process | GO:0002578 | negative regulation of antigen processing and presentation                                                                       | 2/2279 | 9/18866 | 0.297936 | 0.5902856 | 0.5341114 | 2 | THBS1/CD68        |
| Biological Process | GO:0002579 | positive regulation of antigen processing and presentation                                                                       | 2/2279 | 9/18866 | 0.297936 | 0.5902856 | 0.5341114 | 2 | SLC11A1/NOD2      |
| Biological Process | GO:0002725 | negative regulation of T cell cytokine production                                                                                | 2/2279 | 9/18866 | 0.297936 | 0.5902856 | 0.5341114 | 2 | HLA-F/SMAD7       |
| Biological Process | GO:0006451 | translational readthrough                                                                                                        | 2/2279 | 9/18866 | 0.297936 | 0.5902856 | 0.5341114 | 2 | TRNAU1AP/SECISBP2 |
| Biological Process | GO:0006782 | protoporphyrinogen IX biosynthetic process                                                                                       | 2/2279 | 9/18866 | 0.297936 | 0.5902856 | 0.5341114 | 2 | ALAS1/PPOX        |

|                    |            |                                                       |        |         |          |           |           |   |                 |
|--------------------|------------|-------------------------------------------------------|--------|---------|----------|-----------|-----------|---|-----------------|
| Biological Process | GO:0007042 | lysosomal lumen acidification                         | 2/2279 | 9/18866 | 0.297936 | 0.5902856 | 0.5341114 | 2 | GRN/CLN5        |
| Biological Process | GO:0010533 | regulation of activation of Janus kinase activity     | 2/2279 | 9/18866 | 0.297936 | 0.5902856 | 0.5341114 | 2 | CCL5/IL6R       |
| Biological Process | GO:0010898 | positive regulation of triglyceride catabolic process | 2/2279 | 9/18866 | 0.297936 | 0.5902856 | 0.5341114 | 2 | PNPLA2/ABHD5    |
| Biological Process | GO:0014010 | Schwann cell proliferation                            | 2/2279 | 9/18866 | 0.297936 | 0.5902856 | 0.5341114 | 2 | SKI/CERS2       |
| Biological Process | GO:0015810 | aspartate transmembrane transport                     | 2/2279 | 9/18866 | 0.297936 | 0.5902856 | 0.5341114 | 2 | LRRC8C/SLC1A6   |
| Biological Process | GO:0015858 | nucleoside transport                                  | 2/2279 | 9/18866 | 0.297936 | 0.5902856 | 0.5341114 | 2 | SLC29A3/SLC29A1 |
| Biological Process | GO:0019227 | neuronal action potential propagation                 | 2/2279 | 9/18866 | 0.297936 | 0.5902856 | 0.5341114 | 2 | SCN1A/CNTNAP1   |
| Biological Process | GO:0019317 | fucose catabolic process                              | 2/2279 | 9/18866 | 0.297936 | 0.5902856 | 0.5341114 | 2 | FUT4/FUT7       |
| Biological Process | GO:0021860 | pyramidal neuron development                          | 2/2279 | 9/18866 | 0.297936 | 0.5902856 | 0.5341114 | 2 | DISC1/ZMIZ1     |

|                    |            |                                                     |        |         |          |           |           |   |                 |
|--------------------|------------|-----------------------------------------------------|--------|---------|----------|-----------|-----------|---|-----------------|
| Biological Process | GO:0022417 | protein maturation by protein folding               | 2/2279 | 9/18866 | 0.297936 | 0.5902856 | 0.5341114 | 2 | CALR/AIP        |
| Biological Process | GO:0030223 | neutrophil differentiation                          | 2/2279 | 9/18866 | 0.297936 | 0.5902856 | 0.5341114 | 2 | INPP5D/TRIB1    |
| Biological Process | GO:0030917 | midbrain-hindbrain boundary development             | 2/2279 | 9/18866 | 0.297936 | 0.5902856 | 0.5341114 | 2 | SSBP3/HES3      |
| Biological Process | GO:0032959 | inositol trisphosphate biosynthetic process         | 2/2279 | 9/18866 | 0.297936 | 0.5902856 | 0.5341114 | 2 | P2RY6/HRH1      |
| Biological Process | GO:0033212 | iron import into cell                               | 2/2279 | 9/18866 | 0.297936 | 0.5902856 | 0.5341114 | 2 | SLC11A2/LTF     |
| Biological Process | GO:0034058 | endosomal vesicle fusion                            | 2/2279 | 9/18866 | 0.297936 | 0.5902856 | 0.5341114 | 2 | ANKFY1/TGFBRAP1 |
| Biological Process | GO:0034112 | positive regulation of homotypic cell-cell adhesion | 2/2279 | 9/18866 | 0.297936 | 0.5902856 | 0.5341114 | 2 | CCL5/JAK1       |
| Biological Process | GO:0034382 | chylomicron remnant clearance                       | 2/2279 | 9/18866 | 0.297936 | 0.5902856 | 0.5341114 | 2 | LIPC/LMF1       |
| Biological Process | GO:0035973 | aggrephagy                                          | 2/2279 | 9/18866 | 0.297936 | 0.5902856 | 0.5341114 | 2 | HTT/WDR81       |

|                    |            |                                                                     |        |         |          |           |           |   |             |
|--------------------|------------|---------------------------------------------------------------------|--------|---------|----------|-----------|-----------|---|-------------|
| Biological Process | GO:0036363 | transforming growth factor beta activation                          | 2/2279 | 9/18866 | 0.297936 | 0.5902856 | 0.5341114 | 2 | LTBP1/ITGB6 |
| Biological Process | GO:0038113 | interleukin-9-mediated signaling pathway                            | 2/2279 | 9/18866 | 0.297936 | 0.5902856 | 0.5341114 | 2 | STAT5A/JAK1 |
| Biological Process | GO:0038171 | cannabinoid signaling pathway                                       | 2/2279 | 9/18866 | 0.297936 | 0.5902856 | 0.5341114 | 2 | MGLL/CNR2   |
| Biological Process | GO:0042045 | epithelial fluid transport                                          | 2/2279 | 9/18866 | 0.297936 | 0.5902856 | 0.5341114 | 2 | ITPR1/AQP1  |
| Biological Process | GO:0042354 | L-fucose metabolic process                                          | 2/2279 | 9/18866 | 0.297936 | 0.5902856 | 0.5341114 | 2 | FUT4/FUT7   |
| Biological Process | GO:0042355 | L-fucose catabolic process                                          | 2/2279 | 9/18866 | 0.297936 | 0.5902856 | 0.5341114 | 2 | FUT4/FUT7   |
| Biological Process | GO:0043653 | mitochondrial fragmentation involved in apoptotic process           | 2/2279 | 9/18866 | 0.297936 | 0.5902856 | 0.5341114 | 2 | FIS1/DNM1L  |
| Biological Process | GO:0045003 | double-strand break repair via synthesis-dependent strand annealing | 2/2279 | 9/18866 | 0.297936 | 0.5902856 | 0.5341114 | 2 | RAD52/DMC1  |
| Biological Process | GO:0045916 | negative regulation of complement activation                        | 2/2279 | 9/18866 | 0.297936 | 0.5902856 | 0.5341114 | 2 | CD55/CD59   |

|                    |            |                                                      |        |         |          |           |           |   |               |
|--------------------|------------|------------------------------------------------------|--------|---------|----------|-----------|-----------|---|---------------|
| Biological Process | GO:0046645 | positive regulation of gamma-delta T cell activation | 2/2279 | 9/18866 | 0.297936 | 0.5902856 | 0.5341114 | 2 | PTPRC/NOD2    |
| Biological Process | GO:0048087 | positive regulation of developmental pigmentation    | 2/2279 | 9/18866 | 0.297936 | 0.5902856 | 0.5341114 | 2 | ZEB2/BCL2     |
| Biological Process | GO:0048382 | mesendoderm development                              | 2/2279 | 9/18866 | 0.297936 | 0.5902856 | 0.5341114 | 2 | SSBP3/NODAL   |
| Biological Process | GO:0048671 | negative regulation of collateral sprouting          | 2/2279 | 9/18866 | 0.297936 | 0.5902856 | 0.5341114 | 2 | IFRD1/SPART   |
| Biological Process | GO:0051292 | nuclear pore complex assembly                        | 2/2279 | 9/18866 | 0.297936 | 0.5902856 | 0.5341114 | 2 | RTN4/NUP93    |
| Biological Process | GO:0060124 | positive regulation of growth hormone secretion      | 2/2279 | 9/18866 | 0.297936 | 0.5902856 | 0.5341114 | 2 | ITSN1/GHRL    |
| Biological Process | GO:0060180 | female mating behavior                               | 2/2279 | 9/18866 | 0.297936 | 0.5902856 | 0.5341114 | 2 | PPP1R1B/NCOA1 |
| Biological Process | GO:0060242 | contact inhibition                                   | 2/2279 | 9/18866 | 0.297936 | 0.5902856 | 0.5341114 | 2 | PTPRJ/CDHR2   |
| Biological Process | GO:0060245 | detection of cell density                            | 2/2279 | 9/18866 | 0.297936 | 0.5902856 | 0.5341114 | 2 | PTPRJ/CDHR2   |

|                    |            |                                                                  |        |         |          |           |           |   |                   |
|--------------------|------------|------------------------------------------------------------------|--------|---------|----------|-----------|-----------|---|-------------------|
| Biological Process | GO:0060297 | regulation of sarcomere organization                             | 2/2279 | 9/18866 | 0.297936 | 0.5902856 | 0.5341114 | 2 | AKAP13/MEF2C      |
| Biological Process | GO:0060484 | lung-associated mesenchyme development                           | 2/2279 | 9/18866 | 0.297936 | 0.5902856 | 0.5341114 | 2 | WNT11/FGFR1       |
| Biological Process | GO:0060586 | multicellular organismal iron ion homeostasis                    | 2/2279 | 9/18866 | 0.297936 | 0.5902856 | 0.5341114 | 2 | SLC11A1/SLC11A2   |
| Biological Process | GO:0060693 | regulation of branching involved in salivary gland morphogenesis | 2/2279 | 9/18866 | 0.297936 | 0.5902856 | 0.5341114 | 2 | TNF/FGFR1         |
| Biological Process | GO:0061026 | cardiac muscle tissue regeneration                               | 2/2279 | 9/18866 | 0.297936 | 0.5902856 | 0.5341114 | 2 | MIR199A1/MIR199A2 |
| Biological Process | GO:0061820 | telomeric D-loop disassembly                                     | 2/2279 | 9/18866 | 0.297936 | 0.5902856 | 0.5341114 | 2 | BLM/SLX4          |
| Biological Process | GO:0070922 | small RNA loading onto RISC                                      | 2/2279 | 9/18866 | 0.297936 | 0.5902856 | 0.5341114 | 2 | AGO1/AGO2         |
| Biological Process | GO:0071225 | cellular response to muramyl dipeptide                           | 2/2279 | 9/18866 | 0.297936 | 0.5902856 | 0.5341114 | 2 | NOD2/ARHGEF2      |
| Biological Process | GO:0071355 | cellular response to interleukin-9                               | 2/2279 | 9/18866 | 0.297936 | 0.5902856 | 0.5341114 | 2 | STAT5A/JAK1       |



|                    |            |                                                      |        |         |          |           |           |   |                 |
|--------------------|------------|------------------------------------------------------|--------|---------|----------|-----------|-----------|---|-----------------|
| Biological Process | GO:0071374 | cellular response to parathyroid hormone stimulus    | 2/2279 | 9/18866 | 0.297936 | 0.5902856 | 0.5341114 | 2 | HDAC4/MEF2C     |
| Biological Process | GO:0071421 | manganese ion transmembrane transport                | 2/2279 | 9/18866 | 0.297936 | 0.5902856 | 0.5341114 | 2 | SLC11A1/SLC11A2 |
| Biological Process | GO:0071830 | triglyceride-rich lipoprotein particle clearance     | 2/2279 | 9/18866 | 0.297936 | 0.5902856 | 0.5341114 | 2 | LIPC/LMF1       |
| Biological Process | GO:0086015 | SA node cell action potential                        | 2/2279 | 9/18866 | 0.297936 | 0.5902856 | 0.5341114 | 2 | GJA5/ANK2       |
| Biological Process | GO:0086018 | SA node cell to atrial cardiac muscle cell signaling | 2/2279 | 9/18866 | 0.297936 | 0.5902856 | 0.5341114 | 2 | GJA5/ANK2       |
| Biological Process | GO:0097084 | vascular associated smooth muscle cell development   | 2/2279 | 9/18866 | 0.297936 | 0.5902856 | 0.5341114 | 2 | ENG/NOTCH1      |
| Biological Process | GO:0097113 | AMPA glutamate receptor clustering                   | 2/2279 | 9/18866 | 0.297936 | 0.5902856 | 0.5341114 | 2 | SSH1/ZDHHC2     |
| Biological Process | GO:0097688 | glutamate receptor clustering                        | 2/2279 | 9/18866 | 0.297936 | 0.5902856 | 0.5341114 | 2 | SSH1/ZDHHC2     |
| Biological Process | GO:0098870 | action potential propagation                         | 2/2279 | 9/18866 | 0.297936 | 0.5902856 | 0.5341114 | 2 | SCN1A/CNTNAP1   |

|                    |            |                                                                                                            |        |         |          |           |           |   |              |
|--------------------|------------|------------------------------------------------------------------------------------------------------------|--------|---------|----------|-----------|-----------|---|--------------|
| Biological Process | GO:0098976 | excitatory chemical synaptic transmission                                                                  | 2/2279 | 9/18866 | 0.297936 | 0.5902856 | 0.5341114 | 2 | SSH1/PDLIM4  |
| Biological Process | GO:0099641 | anterograde axonal protein transport                                                                       | 2/2279 | 9/18866 | 0.297936 | 0.5902856 | 0.5341114 | 2 | KIF5C/MAP1A  |
| Biological Process | GO:1902459 | positive regulation of stem cell population maintenance                                                    | 2/2279 | 9/18866 | 0.297936 | 0.5902856 | 0.5341114 | 2 | LBH/ESRRB    |
| Biological Process | GO:1902746 | regulation of lens fiber cell differentiation                                                              | 2/2279 | 9/18866 | 0.297936 | 0.5902856 | 0.5341114 | 2 | SPRED2/ZEB2  |
| Biological Process | GO:1902959 | regulation of aspartic-type endopeptidase activity involved in amyloid precursor protein catabolic process | 2/2279 | 9/18866 | 0.297936 | 0.5902856 | 0.5341114 | 2 | SORL1/BIN1   |
| Biological Process | GO:1903012 | positive regulation of bone development                                                                    | 2/2279 | 9/18866 | 0.297936 | 0.5902856 | 0.5341114 | 2 | GHRL/LTF     |
| Biological Process | GO:1903069 | regulation of ER-associated ubiquitin-dependent protein catabolic process                                  | 2/2279 | 9/18866 | 0.297936 | 0.5902856 | 0.5341114 | 2 | NFE2L2/SVIP  |
| Biological Process | GO:1903147 | negative regulation of autophagy of mitochondrion                                                          | 2/2279 | 9/18866 | 0.297936 | 0.5902856 | 0.5341114 | 2 | CLEC16A/TSC2 |
| Biological Process | GO:2000270 | negative regulation of fibroblast apoptotic process                                                        | 2/2279 | 9/18866 | 0.297936 | 0.5902856 | 0.5341114 | 2 | MIR24-2/CHD8 |

|                    |            |                                                                    |         |           |           |           |           |    |                                                                                                                                                                                                                                                                                                                      |
|--------------------|------------|--------------------------------------------------------------------|---------|-----------|-----------|-----------|-----------|----|----------------------------------------------------------------------------------------------------------------------------------------------------------------------------------------------------------------------------------------------------------------------------------------------------------------------|
| Biological Process | GO:2000343 | positive regulation of chemokine (C-X-C motif) ligand 2 production | 2/2279  | 9/18866   | 0.297936  | 0.5902856 | 0.5341114 | 2  | TNF/MBP                                                                                                                                                                                                                                                                                                              |
| Biological Process | GO:0014855 | striated muscle cell proliferation                                 | 12/2279 | 83/18866  | 0.2983944 | 0.5902856 | 0.5341114 | 12 | RXRA/ANGPT1/MIR199A1/VGLL4/TGFBR2/RIPK1/RBPJ/FGFR1/MEIS1/MIR199A2/NOTCH1/MEF2C                                                                                                                                                                                                                                       |
| Biological Process | GO:0071277 | cellular response to calcium ion                                   | 12/2279 | 83/18866  | 0.2983944 | 0.5902856 | 0.5341114 | 12 | TRPM2/CPNE6/CPNE2/ITPKB/GPLD1/CPNE5/CPNE1/CRHBP/ADD1/MEF2C/SYT17/PRKAA1                                                                                                                                                                                                                                              |
| Biological Process | GO:0007517 | muscle organ development                                           | 53/2279 | 407/18866 | 0.2993139 | 0.5902856 | 0.5341114 | 53 | FOXP1/HDAC4/ARID5B/ZFPM1/RXRA/CTDP1/TTN/CREB1/MEF2D/MIR143/MIR145/SKI/MYLK/SMAD3/MIR199A1/VGLL4/ZFH3/CCM2L/TGFBR2/MYH15/DLL1/RIPK1/RBPJ/TCF12/SMAD7/FGFR1/PAX7/TGFB1/IGSF8/VAMP5/SVIL/NF1/ENG/ARRB2/ARNTL/UNC45A/MYOM1/ANKRD2/RB1/MEIS1/BCL2/MIR199A2/NOTCH1/MEF2C/HLX/USP2/ANKRD1/FLOT1/CASQ1/SMTN/LIF/PRKAA1/MYORG |
| Biological Process | GO:0001919 | regulation of receptor recycling                                   | 4/2279  | 23/18866  | 0.2996014 | 0.5902856 | 0.5341114 | 4  | TBC1D16/ARAP1/EPS15/INPP5F                                                                                                                                                                                                                                                                                           |
| Biological Process | GO:0002052 | positive regulation of neuroblast proliferation                    | 4/2279  | 23/18866  | 0.2996014 | 0.5902856 | 0.5341114 | 4  | DISC1/ZNF335/NOTCH1/CX3CR1                                                                                                                                                                                                                                                                                           |
| Biological Process | GO:0007097 | nuclear migration                                                  | 4/2279  | 23/18866  | 0.2996014 | 0.5902856 | 0.5341114 | 4  | DCTN1/DYNC1H1/FBXW11/SLIT1                                                                                                                                                                                                                                                                                           |
| Biological Process | GO:0007413 | axonal fasciculation                                               | 4/2279  | 23/18866  | 0.2996014 | 0.5902856 | 0.5341114 | 4  | NCAM2/EPHB3/RTN4/TNFRSF21                                                                                                                                                                                                                                                                                            |
| Biological Process | GO:0010866 | regulation of triglyceride biosynthetic process                    | 4/2279  | 23/18866  | 0.2996014 | 0.5902856 | 0.5341114 | 4  | MFSD2A/GPLD1/NR1H2/SREBF1                                                                                                                                                                                                                                                                                            |

|                    |            |                                                           |        |          |           |           |           |   |                             |
|--------------------|------------|-----------------------------------------------------------|--------|----------|-----------|-----------|-----------|---|-----------------------------|
| Biological Process | GO:0015813 | L-glutamate transmembrane transport                       | 4/2279 | 23/18866 | 0.2996014 | 0.5902856 | 0.5341114 | 4 | SLC1A2/SLC1A6/PER2/SLC1A3   |
| Biological Process | GO:0022010 | central nervous system myelination                        | 4/2279 | 23/18866 | 0.2996014 | 0.5902856 | 0.5341114 | 4 | CLU/FA2H/CNTNAP1/ERCC2      |
| Biological Process | GO:0032291 | axon ensheathment in central nervous system               | 4/2279 | 23/18866 | 0.2996014 | 0.5902856 | 0.5341114 | 4 | CLU/FA2H/CNTNAP1/ERCC2      |
| Biological Process | GO:0032401 | establishment of melanosome localization                  | 4/2279 | 23/18866 | 0.2996014 | 0.5902856 | 0.5341114 | 4 | RAB27A/CDH3/DCTN2/MYO5A     |
| Biological Process | GO:0034063 | stress granule assembly                                   | 4/2279 | 23/18866 | 0.2996014 | 0.5902856 | 0.5341114 | 4 | DYNC1H1/CSDE1/UBAP2L/PRKAA1 |
| Biological Process | GO:0035458 | cellular response to interferon-beta                      | 4/2279 | 23/18866 | 0.2996014 | 0.5902856 | 0.5341114 | 4 | AIM2/MNDA/DDX41/STING1      |
| Biological Process | GO:0048714 | positive regulation of oligodendrocyte differentiation    | 4/2279 | 23/18866 | 0.2996014 | 0.5902856 | 0.5341114 | 4 | PPARG/TNFRSF1B/RHEB/HDAC1   |
| Biological Process | GO:0050951 | sensory perception of temperature stimulus                | 4/2279 | 23/18866 | 0.2996014 | 0.5902856 | 0.5341114 | 4 | WDR47/ARRB2/NTRK1/TRPM3     |
| Biological Process | GO:0051151 | negative regulation of smooth muscle cell differentiation | 4/2279 | 23/18866 | 0.2996014 | 0.5902856 | 0.5341114 | 4 | NFATC2/NFATC1/PDGFB/DNMT1   |

|                    |            |                                                                     |        |          |           |           |           |   |                                 |
|--------------------|------------|---------------------------------------------------------------------|--------|----------|-----------|-----------|-----------|---|---------------------------------|
| Biological Process | GO:0051457 | maintenance of protein location in nucleus                          | 4/2279 | 23/18866 | 0.2996014 | 0.5902856 | 0.5341114 | 4 | SYNE1/MORC3/SP100/BCL3          |
| Biological Process | GO:0051570 | regulation of histone H3-K9 methylation                             | 4/2279 | 23/18866 | 0.2996014 | 0.5902856 | 0.5341114 | 4 | MYB/KDM4C/DNMT1/PIH1D1          |
| Biological Process | GO:0051904 | pigment granule transport                                           | 4/2279 | 23/18866 | 0.2996014 | 0.5902856 | 0.5341114 | 4 | RAB27A/CDH3/DCTN2/MYO5A         |
| Biological Process | GO:0071577 | zinc ion transmembrane transport                                    | 4/2279 | 23/18866 | 0.2996014 | 0.5902856 | 0.5341114 | 4 | TRPM2/SLC39A11/TMEM163/SLC39A13 |
| Biological Process | GO:0072170 | metanephric tubule development                                      | 4/2279 | 23/18866 | 0.2996014 | 0.5902856 | 0.5341114 | 4 | PAX2/WWTR1/ACAT1/LIF            |
| Biological Process | GO:0072243 | metanephric nephron epithelium development                          | 4/2279 | 23/18866 | 0.2996014 | 0.5902856 | 0.5341114 | 4 | PAX2/WWTR1/ACAT1/LIF            |
| Biological Process | GO:0086012 | membrane depolarization during cardiac muscle cell action potential | 4/2279 | 23/18866 | 0.2996014 | 0.5902856 | 0.5341114 | 4 | CACNA1C/SLC8A1/GJA5/ANK2        |
| Biological Process | GO:0106030 | neuron projection fasciculation                                     | 4/2279 | 23/18866 | 0.2996014 | 0.5902856 | 0.5341114 | 4 | NCAM2/EPHB3/RTN4/TNFRSF21       |
| Biological Process | GO:1900273 | positive regulation of long-term synaptic potentiation              | 4/2279 | 23/18866 | 0.2996014 | 0.5902856 | 0.5341114 | 4 | CREB1/ZDHHC2/APP/AKAP5          |

|                    |            |                                                                        |         |           |           |           |           |    |                                                                                                                                                                                               |
|--------------------|------------|------------------------------------------------------------------------|---------|-----------|-----------|-----------|-----------|----|-----------------------------------------------------------------------------------------------------------------------------------------------------------------------------------------------|
| Biological Process | GO:1903798 | regulation of production of miRNAs involved in gene silencing by miRNA | 4/2279  | 23/18866  | 0.2996014 | 0.5902856 | 0.5341114 | 4  | NCOR2/TNF/RIPK1/TGFB1                                                                                                                                                                         |
| Biological Process | GO:2000050 | regulation of non-canonical Wnt signaling pathway                      | 4/2279  | 23/18866  | 0.2996014 | 0.5902856 | 0.5341114 | 4  | CSNK1D/CSNK1E/RNF213/ANKRD6                                                                                                                                                                   |
| Biological Process | GO:2000726 | negative regulation of cardiac muscle cell differentiation             | 4/2279  | 23/18866  | 0.2996014 | 0.5902856 | 0.5341114 | 4  | CTDP1/MIR199A1/DLL1/MIR199A2                                                                                                                                                                  |
| Biological Process | GO:0016202 | regulation of striated muscle tissue development                       | 21/2279 | 153/18866 | 0.2996031 | 0.5902856 | 0.5341114 | 21 | HDAC4/CTDP1/CREB1/SMAD3/MIR199A1/VGLL4/TGFBR2/DLL1/RIPK1/RBPJ/FGFR1/TGFB1/ARRB2/ARNTL/MEIS1/BCL2/MIR199A2/NOTCH1/MEF2C/FLOT1/PRKAA1                                                           |
| Biological Process | GO:0009062 | fatty acid catabolic process                                           | 16/2279 | 114/18866 | 0.2997191 | 0.5902856 | 0.5341114 | 16 | PLA2G15/MFSD2A/ABHD16A/AMACR/ACOXL/CYP4F3/ACADM/ACACB/ACOX2/PCK2/ACAT1/ADTRP/CPT1A/LPIN1/LYPLA2/ACADVL                                                                                        |
| Biological Process | GO:0043200 | response to amino acid                                                 | 16/2279 | 114/18866 | 0.2997191 | 0.5902856 | 0.5341114 | 16 | RPTOR/CREB1/TNF/BCL11A/BAIAP2/PDGFD/SLC1A2/CPEB3/SH3BP4/DNMT1/PDGFC/CEBPB/BCL2L1/RELA/DHODH/SST                                                                                               |
| Biological Process | GO:0019882 | antigen processing and presentation                                    | 31/2279 | 232/18866 | 0.3014741 | 0.5902856 | 0.5341114 | 31 | HLA-DMB/DCTN1/CALR/AP2A1/SLC11A1/LNPEP/NCF4/RAB5B/DNM2/DYNC1H1/CTSD/HLA-C/THBS1/CTSH/RAB27A/HLA-F/NCF2/ITGB5/AP1B1/DCTN2/SEC13/PSMF1/SEC24C/NOD2/PSMB7/KIFAP3/CD68/AP3D1/SEC31A/PSMD13/MARCH8 |
| Biological Process | GO:1901379 | regulation of potassium ion transmembrane transport                    | 13/2279 | 91/18866  | 0.3027208 | 0.5902856 | 0.5341114 | 13 | KCNE1/KCNAB2/CASQ2/WWP2/DNM2/BIN1/NOS1AP/KCNIP1/CAB39/KCNQ1/NEDD4/ANO6/ANK2                                                                                                                   |
| Biological Process | GO:0051100 | negative regulation of binding                                         | 23/2279 | 169/18866 | 0.3027889 | 0.5902856 | 0.5341114 | 23 | SLPI/CTSZ/ZFPM1/SORL1/IL10/TNKS/ITGB1BP1/CCM2L/DISC1/MIR27A/CPNE1/ATP2A3/CSNK1E/PDGFB/RSF1/ZNF462/ARRB2/PER2/SP100/DTNBP1/TFIP11/ILRUN/FBH1                                                   |

|                    |            |                                                                      |         |          |           |           |           |    |                                                              |
|--------------------|------------|----------------------------------------------------------------------|---------|----------|-----------|-----------|-----------|----|--------------------------------------------------------------|
| Biological Process | GO:0002637 | regulation of immunoglobulin production                              | 10/2279 | 68/18866 | 0.3032641 | 0.5902856 | 0.5341114 | 10 | IL10/TNF/TRAF2/TLR9/TGFB1/PTPRC/TP53BP1/TNFSF13/PAXIP1/NSD2  |
| Biological Process | GO:0071479 | cellular response to ionizing radiation                              | 10/2279 | 68/18866 | 0.3032641 | 0.5902856 | 0.5341114 | 10 | BLM/SPIDR/DNM2/HUS1/TP53BP1/RHNO1/CHEK2/BCL2L1/EEF1D/MAP3K20 |
| Biological Process | GO:0099072 | regulation of postsynaptic membrane neurotransmitter receptor levels | 10/2279 | 68/18866 | 0.3032641 | 0.5902856 | 0.5341114 | 10 | PRKCZ/DNM2/NUMB/ITGB3/PRKCI/GSG1L/DNM1/DNM3/EP515/MX1        |
| Biological Process | GO:1904377 | positive regulation of protein localization to cell periphery        | 10/2279 | 68/18866 | 0.3032641 | 0.5902856 | 0.5341114 | 10 | PIK3R1/RHOG/TNF/ZDHHC2/AKAP5/PRKCH/NUMA1/PRKCI/PRKCE/EZR     |
| Biological Process | GO:0002295 | T-helper cell lineage commitment                                     | 3/2279  | 16/18866 | 0.3035198 | 0.5902856 | 0.5341114 | 3  | ZFPM1/LOXL3/LY9                                              |
| Biological Process | GO:0006206 | pyrimidine nucleobase metabolic process                              | 3/2279  | 16/18866 | 0.3035198 | 0.5902856 | 0.5341114 | 3  | CDA/DPYS/DHODH                                               |
| Biological Process | GO:0006268 | DNA unwinding involved in DNA replication                            | 3/2279  | 16/18866 | 0.3035198 | 0.5902856 | 0.5341114 | 3  | BLM/RECQL5/MCM2                                              |
| Biological Process | GO:0007288 | sperm axoneme assembly                                               | 3/2279  | 16/18866 | 0.3035198 | 0.5902856 | 0.5341114 | 3  | IQCG/ARMC2/TLL1                                              |
| Biological Process | GO:0009129 | pyrimidine nucleoside monophosphate metabolic process                | 3/2279  | 16/18866 | 0.3035198 | 0.5902856 | 0.5341114 | 3  | UCK2/DCTD/DHODH                                              |

|                    |            |                                                                         |        |          |           |           |           |   |                       |
|--------------------|------------|-------------------------------------------------------------------------|--------|----------|-----------|-----------|-----------|---|-----------------------|
| Biological Process | GO:0010820 | positive regulation of T cell chemotaxis                                | 3/2279 | 16/18866 | 0.3035198 | 0.5902856 | 0.5341114 | 3 | CCR2/CCL5/CCL27       |
| Biological Process | GO:0017014 | protein nitrosylation                                                   | 3/2279 | 16/18866 | 0.3035198 | 0.5902856 | 0.5341114 | 3 | S100A8/NOS1AP/SNTA1   |
| Biological Process | GO:0018119 | peptidyl-cysteine S-nitrosylation                                       | 3/2279 | 16/18866 | 0.3035198 | 0.5902856 | 0.5341114 | 3 | S100A8/NOS1AP/SNTA1   |
| Biological Process | GO:0031573 | intra-S DNA damage checkpoint                                           | 3/2279 | 16/18866 | 0.3035198 | 0.5902856 | 0.5341114 | 3 | HUS1/EME1/CHEK2       |
| Biological Process | GO:0033008 | positive regulation of mast cell activation involved in immune response | 3/2279 | 16/18866 | 0.3035198 | 0.5902856 | 0.5341114 | 3 | GAB2/FGR/SPHK2        |
| Biological Process | GO:0042532 | negative regulation of tyrosine phosphorylation of STAT protein         | 3/2279 | 16/18866 | 0.3035198 | 0.5902856 | 0.5341114 | 3 | PPP2R1A/GGNBP2/INPP5F |
| Biological Process | GO:0043116 | negative regulation of vascular permeability                            | 3/2279 | 16/18866 | 0.3035198 | 0.5902856 | 0.5341114 | 3 | ANGPT1/MIR23A/PTPRJ   |
| Biological Process | GO:0043306 | positive regulation of mast cell degranulation                          | 3/2279 | 16/18866 | 0.3035198 | 0.5902856 | 0.5341114 | 3 | GAB2/FGR/SPHK2        |
| Biological Process | GO:0043981 | histone H4-K5 acetylation                                               | 3/2279 | 16/18866 | 0.3035198 | 0.5902856 | 0.5341114 | 3 | KANSL1/KANSL2/KAT7    |



|                    |            |                                                                   |        |          |           |           |           |   |                    |
|--------------------|------------|-------------------------------------------------------------------|--------|----------|-----------|-----------|-----------|---|--------------------|
| Biological Process | GO:0043982 | histone H4-K8 acetylation                                         | 3/2279 | 16/18866 | 0.3035198 | 0.5902856 | 0.5341114 | 3 | KANSL1/KANSL2/KAT7 |
| Biological Process | GO:0045342 | MHC class II biosynthetic process                                 | 3/2279 | 16/18866 | 0.3035198 | 0.5902856 | 0.5341114 | 3 | AZU1/IL10/SLC11A1  |
| Biological Process | GO:0045989 | positive regulation of striated muscle contraction                | 3/2279 | 16/18866 | 0.3035198 | 0.5902856 | 0.5341114 | 3 | NOS1AP/KCNQ1/GSTO1 |
| Biological Process | GO:0046325 | negative regulation of glucose import                             | 3/2279 | 16/18866 | 0.3035198 | 0.5902856 | 0.5341114 | 3 | MIR143/TNF/GRB10   |
| Biological Process | GO:0051238 | sequestering of metal ion                                         | 3/2279 | 16/18866 | 0.3035198 | 0.5902856 | 0.5341114 | 3 | S100A8/LCN2/AP3D1  |
| Biological Process | GO:0051447 | negative regulation of meiotic cell cycle                         | 3/2279 | 16/18866 | 0.3035198 | 0.5902856 | 0.5341114 | 3 | OVOL1/NPPC/LIF     |
| Biological Process | GO:0051770 | positive regulation of nitric-oxide synthase biosynthetic process | 3/2279 | 16/18866 | 0.3035198 | 0.5902856 | 0.5341114 | 3 | MAP2K6/TLR9/NOD2   |
| Biological Process | GO:0060413 | atrial septum morphogenesis                                       | 3/2279 | 16/18866 | 0.3035198 | 0.5902856 | 0.5341114 | 3 | ZFPM1/GJAS/NSD2    |
| Biological Process | GO:0060850 | regulation of transcription involved in cell fate commitment      | 3/2279 | 16/18866 | 0.3035198 | 0.5902856 | 0.5341114 | 3 | PPARG/ZBTB7B/CEBPB |

|                    |            |                                                                                                              |        |          |           |           |           |   |                     |
|--------------------|------------|--------------------------------------------------------------------------------------------------------------|--------|----------|-----------|-----------|-----------|---|---------------------|
| Biological Process | GO:0071391 | cellular response to estrogen stimulus                                                                       | 3/2279 | 16/18866 | 0.3035198 | 0.5902856 | 0.5341114 | 3 | CRHBP/RARA/NCOA4    |
| Biological Process | GO:0072224 | metanephric glomerulus development                                                                           | 3/2279 | 16/18866 | 0.3035198 | 0.5902856 | 0.5341114 | 3 | PAX2/PDGFB/PDGFRB   |
| Biological Process | GO:0086103 | G protein-coupled receptor signaling pathway involved in heart process                                       | 3/2279 | 16/18866 | 0.3035198 | 0.5902856 | 0.5341114 | 3 | PDE4D/AKAP13/GNAI2  |
| Biological Process | GO:0090069 | regulation of ribosome biogenesis                                                                            | 3/2279 | 16/18866 | 0.3035198 | 0.5902856 | 0.5341114 | 3 | WDR43/USP36/RIOK1   |
| Biological Process | GO:1901201 | regulation of extracellular matrix assembly                                                                  | 3/2279 | 16/18866 | 0.3035198 | 0.5902856 | 0.5341114 | 3 | SMAD3/TGFB1/NOTCH1  |
| Biological Process | GO:1902166 | negative regulation of intrinsic apoptotic signaling pathway in response to DNA damage by p53 class mediator | 3/2279 | 16/18866 | 0.3035198 | 0.5902856 | 0.5341114 | 3 | ZNF385A/BCL2/MARCH7 |
| Biological Process | GO:1904294 | positive regulation of ERAD pathway                                                                          | 3/2279 | 16/18866 | 0.3035198 | 0.5902856 | 0.5341114 | 3 | EDEM1/EDEM2/NFE2L2  |
| Biological Process | GO:1905153 | regulation of membrane invagination                                                                          | 3/2279 | 16/18866 | 0.3035198 | 0.5902856 | 0.5341114 | 3 | PPARG/RAB31/ANO6    |
| Biological Process | GO:2000651 | positive regulation of sodium ion transmembrane transporter activity                                         | 3/2279 | 16/18866 | 0.3035198 | 0.5902856 | 0.5341114 | 3 | DNM2/TESC/ACTN4     |

|                    |            |                                                                   |         |           |           |           |           |    |                                                                                                                                                                                                                                                                                                                                                            |
|--------------------|------------|-------------------------------------------------------------------|---------|-----------|-----------|-----------|-----------|----|------------------------------------------------------------------------------------------------------------------------------------------------------------------------------------------------------------------------------------------------------------------------------------------------------------------------------------------------------------|
| Biological Process | GO:2001257 | regulation of cation channel activity                             | 25/2279 | 185/18866 | 0.3053241 | 0.5902856 | 0.5341114 | 25 | PDE4D/KCNE1/CASQ2/CCR2/JSRP1/AHNAK/APP/NOS1AP/P2RY6/CRHBP/CNIH2/MYO5A/HTT/MAPK8IP2/GSG1L/GSTO1/MEF2C/SHANK2/DYSF/ANK2/CASQ1/FGF14/CBARP/STIMATE/CRACR2A                                                                                                                                                                                                    |
| Biological Process | GO:0043161 | proteasome-mediated ubiquitin-dependent protein catabolic process | 55/2279 | 424/18866 | 0.3056633 | 0.5902856 | 0.5341114 | 55 | TRIM39/MAEA/RNF144A/FZR1/RNF19A/TRIM38/WWP2/CSNK1D/AMFR/ARRB1/RHBDD2/CBFA2T3/CUL3/EDEM1/CDC16/DERL2/CLU/SMAD7/UBE2J2/PPP2R5C/SMURF1/MTA1/CLEC16A/WWTR1/FBXL19/EDEM2/CSNK1E/PSMF1/FBXL13/UBXN11/KCTD2/NFE2L2/ARRB2/ARNTL/FBXL18/RNF144B/PSMB7/MAP1A/FBXL6/GNA12/UBXN2A/NEDD4/ANAPC7/RNF14/TRIB1/HECW2/FBXW11/BAG5/GID8/UBXN8/PELI1/PSMD13/SVIP/MARCHF6/PRKN |
| Biological Process | GO:0034612 | response to tumor necrosis factor                                 | 42/2279 | 320/18866 | 0.3057405 | 0.5902856 | 0.5341114 | 42 | HDAC4/AIM2/LCN2/CHI3L1/TNFRSF1B/GGT1/TNF/TRAF2/TNFAIP3/CCL5/TRAF1/TNFSF13B/ABCC2/TRAIP/THBS1/RIPK1/ACTN4/MIR24-2/TNFRSF1A/ILK/TNFRSF21/CPNE1/CRHBP/SGMS1/ADAMTS13/CDIP1/PRPF8/CCL20/PSMF1/MAP3K14/NFE2L2/PSMB7/ARHGEF2/CASP1/TNFSF12/TNFSF13/CYLD/ANKRD1/RELA/CCL22/PSMD13/PRKN                                                                            |
| Biological Process | GO:0061136 | regulation of proteasomal protein catabolic process               | 26/2279 | 193/18866 | 0.3063916 | 0.5902856 | 0.5341114 | 26 | TRIM39/RNF144A/FZR1/RNF19A/CSNK1D/CBFA2T3/UBAC2/EDEM1/DERL2/CLU/SMAD7/CLEC16A/EDEM2/CSNK1E/PSMF1/NFE2L2/RNF144B/MAP1A/GNA12/RNF14/TRIB1/RNF40/BAG5/SVIP/PRKN/MARCHF7                                                                                                                                                                                       |
| Biological Process | GO:0034340 | response to type I interferon                                     | 14/2279 | 99/18866  | 0.3063945 | 0.5902856 | 0.5341114 | 14 | IRF8/IRF5/SETD2/HLA-C/HLA-F/PTPN6/JAK1/NLRC5/SP100/MX1/IRF2/ISG20/FADD/SHFL                                                                                                                                                                                                                                                                                |
| Biological Process | GO:1905037 | autophagosome organization                                        | 14/2279 | 99/18866  | 0.3063945 | 0.5902856 | 0.5341114 | 14 | ULK1/PACS2/WIP1/PIP4K2A/FEZ2/SMURF1/RUFY4/RAB43/ATG14/TBC1D14/VMP1/UBXN2A/NPRL2/STING1                                                                                                                                                                                                                                                                     |
| Biological Process | GO:0045010 | actin nucleation                                                  | 8/2279  | 53/18866  | 0.3068892 | 0.5902856 | 0.5341114 | 8  | TRIM27/GSN/WHAMM/WASL/GMFB/NCKAP1/CYFIP1/GMFG                                                                                                                                                                                                                                                                                                              |
| Biological Process | GO:0072698 | protein localization to microtubule cytoskeleton                  | 8/2279  | 53/18866  | 0.3068892 | 0.5902856 | 0.5341114 | 8  | CSNK1D/CHAMP1/DISC1/DCTN2/NUMA1/MAP1A/SPAG5/CEP72                                                                                                                                                                                                                                                                                                          |
| Biological Process | GO:0000724 | double-strand break repair via homologous recombination           | 19/2279 | 138/18866 | 0.3069143 | 0.5902856 | 0.5341114 | 19 | BLM/SPIDR/BRCA2/RMI2/RAD52/SETD2/RTEL1/HUS1/NSMCE2/MCM5/RECQL5/MEIOB/AP5S1/MCM2/RAD21L1/DMC1/TP53BP1/SLX4/FBH1                                                                                                                                                                                                                                             |

|                    |            |                                                          |         |           |           |           |           |    |                                                                                                              |
|--------------------|------------|----------------------------------------------------------|---------|-----------|-----------|-----------|-----------|----|--------------------------------------------------------------------------------------------------------------|
| Biological Process | GO:0098754 | detoxification                                           | 19/2279 | 138/18866 | 0.3069143 | 0.5902856 | 0.5341114 | 19 | MPO/LPO/TNF/ABCC2/OSCP1/RALBP1/HBB/MGST2/SLC22A5/CAT/NFE2L2/NXN/GSTO1/PDZK1/TXNRD2/GSTO2/SIRT3/PRXL2B/MTARC1 |
| Biological Process | GO:0003298 | physiological muscle hypertrophy                         | 6/2279  | 38/18866  | 0.3075287 | 0.5902856 | 0.5341114 | 6  | CTDP1/AKAP13/MIR199A1/MIR24-2/MIR23A/MIR199A2                                                                |
| Biological Process | GO:0003301 | physiological cardiac muscle hypertrophy                 | 6/2279  | 38/18866  | 0.3075287 | 0.5902856 | 0.5341114 | 6  | CTDP1/AKAP13/MIR199A1/MIR24-2/MIR23A/MIR199A2                                                                |
| Biological Process | GO:0006084 | acetyl-CoA metabolic process                             | 6/2279  | 38/18866  | 0.3075287 | 0.5902856 | 0.5341114 | 6  | ACSS1/ACACB/ACSS2/ACACA/ACAT1/HMGCS1                                                                         |
| Biological Process | GO:0006361 | transcription initiation from RNA polymerase I promoter  | 6/2279  | 38/18866  | 0.3075287 | 0.5902856 | 0.5341114 | 6  | TAF1C/POLR2F/CCNH/PIH1D1/TAF1D/ERCC2                                                                         |
| Biological Process | GO:0032885 | regulation of polysaccharide biosynthetic process        | 6/2279  | 38/18866  | 0.3075287 | 0.5902856 | 0.5341114 | 6  | AP2A1/TGFB1/DYRK2/PDGFB/PPP1CB/ESRRB                                                                         |
| Biological Process | GO:0034661 | ncRNA catabolic process                                  | 6/2279  | 38/18866  | 0.3075287 | 0.5902856 | 0.5341114 | 6  | EXOSC2/SLFN14/DEDD2/DIS3L2/SND1/ZCCHC8                                                                       |
| Biological Process | GO:0060045 | positive regulation of cardiac muscle cell proliferation | 6/2279  | 38/18866  | 0.3075287 | 0.5902856 | 0.5341114 | 6  | MIR199A1/RBPJ/FGFR1/MIR199A2/NOTCH1/MEF2C                                                                    |
| Biological Process | GO:0061049 | cell growth involved in cardiac muscle cell development  | 6/2279  | 38/18866  | 0.3075287 | 0.5902856 | 0.5341114 | 6  | CTDP1/AKAP13/MIR199A1/MIR24-2/MIR23A/MIR199A2                                                                |

|                    |            |                                                                 |         |           |           |           |           |    |                                                                                                                                                                                                                                                                                                                               |
|--------------------|------------|-----------------------------------------------------------------|---------|-----------|-----------|-----------|-----------|----|-------------------------------------------------------------------------------------------------------------------------------------------------------------------------------------------------------------------------------------------------------------------------------------------------------------------------------|
| Biological Process | GO:1905898 | positive regulation of response to endoplasmic reticulum stress | 6/2279  | 38/18866  | 0.3075287 | 0.5902856 | 0.5341114 | 6  | ERN1/PIK3R1/NCK2/EDEM1/EDEM2/NFE2L2                                                                                                                                                                                                                                                                                           |
| Biological Process | GO:0014743 | regulation of muscle hypertrophy                                | 11/2279 | 76/18866  | 0.3086556 | 0.5902856 | 0.5341114 | 11 | CTDP1/MIR145/TNFRSF1B/SMAD3/PRKCA/MIR199A1/TNFRSF1A/PDE9A/MIR199A2/NOTCH1/FOXO1                                                                                                                                                                                                                                               |
| Biological Process | GO:0071229 | cellular response to acid chemical                              | 11/2279 | 76/18866  | 0.3086556 | 0.5902856 | 0.5341114 | 11 | RPTOR/TNF/BCL11A/BAIAP2/PDGFD/CPEB3/SH3BP4/DNMT1/PDGFC/CEBPB/BCL2L1                                                                                                                                                                                                                                                           |
| Biological Process | GO:1901616 | organic hydroxy compound catabolic process                      | 11/2279 | 76/18866  | 0.3086556 | 0.5902856 | 0.5341114 | 11 | SYNJ2/INPP5A/ALDH2/AKR1D1/COMT/NUDT3/FAH/CYP4F3/SULT1A2/INPP5E/IMPA2                                                                                                                                                                                                                                                          |
| Biological Process | GO:0000018 | regulation of DNA recombination                                 | 15/2279 | 107/18866 | 0.3095373 | 0.5902856 | 0.5341114 | 15 | BLM/SPIDR/IL10/RMI2/SETD2/RTEL1/RECL5/TGFB1/PTPRC/TP53BP1/TNFSF13/ERCC2/PAXIP1/NSD2/FBH1                                                                                                                                                                                                                                      |
| Biological Process | GO:1903426 | regulation of reactive oxygen species biosynthetic process      | 15/2279 | 107/18866 | 0.3095373 | 0.5902856 | 0.5341114 | 15 | HDAC4/IL10/SMAD3/DNM2/MIR199A1/TNF/RAB27A/NOS1AP/MIR24-2/CLU/SPHK2/HBB/ITGB2/MIR199A2/CX3CR1                                                                                                                                                                                                                                  |
| Biological Process | GO:0043620 | regulation of DNA-templated transcription in response to stress | 16/2279 | 115/18866 | 0.3122419 | 0.5902856 | 0.5341114 | 16 | RPS6KA1/NCK2/RBPJ/LIMD1/PSMF1/CREBBP/NFE2L2/ANKRD2/PSMB7/NOTCH1/EPAS1/NEDD4/CEBPB/BACH1/RELA/PSMD13                                                                                                                                                                                                                           |
| Biological Process | GO:0002831 | regulation of response to biotic stimulus                       | 53/2279 | 409/18866 | 0.3125115 | 0.5902856 | 0.5341114 | 53 | IL27/NLRC4/FOXP1/AIM2/TRIM38/PPARG/CD55/CLEC4C/PIK3R6/PRKCA/FGR/TNFAIP3/CCL5/FPR2/MNDA/CD226/HLA-F/PTPN6/MUC12/JAK1/SCIMP/NCR1/LY86/FCN1/TRIM5/MUC20/NR1H2/TREML4/SEC14L1/BCL10/PSMF1/GRN/NLRC5/ZDHHC1/CREBBP/ARRB2/IL18RAP/PSMB7/TRAF3IP2/LTF/TRIB1/TYRO3/CADM1/CD96/RELA/FBXW11/HEXIM1/HERC5/PARP9/FADD/PSMD13/STING1/ILRUN |
| Biological Process | GO:0014031 | mesenchymal cell development                                    | 12/2279 | 84/18866  | 0.3131111 | 0.5902856 | 0.5341114 | 12 | SEMA6B/NRP2/ANXA6/ZEB2/SEMA4A/SEMA4B/SEMA4D/RDH10/BCL2/NOTCH1/CORO1C/ALDH1A2                                                                                                                                                                                                                                                  |

|                    |            |                                                                |         |          |           |           |           |    |                                                                              |
|--------------------|------------|----------------------------------------------------------------|---------|----------|-----------|-----------|-----------|----|------------------------------------------------------------------------------|
| Biological Process | GO:0045913 | positive regulation of carbohydrate metabolic process          | 12/2279 | 84/18866 | 0.3131111 | 0.5902856 | 0.5341114 | 12 | PFKFB4/GPLD1/APP/P2RY6/HRH1/DYRK2/PDGFB/ESRRB/PRKCE/FOXO1/PFKFB3/PRKAA1      |
| Biological Process | GO:0046209 | nitric oxide metabolic process                                 | 12/2279 | 84/18866 | 0.3131111 | 0.5902856 | 0.5341114 | 12 | IL10/SMAD3/DNM2/MIR199A1/TNF/NOS1AP/CLU/HBB/POR/ITGB2/MIR199A2/CX3CR1        |
| Biological Process | GO:0048864 | stem cell development                                          | 12/2279 | 84/18866 | 0.3131111 | 0.5902856 | 0.5341114 | 12 | SEMA6B/NRP2/SETD2/ANXA6/ZEB2/SEMA4A/SEMA4B/SEMA4D/RDH10/PTPRC/CORO1C/ALDH1A2 |
| Biological Process | GO:0010574 | regulation of vascular endothelial growth factor production    | 9/2279  | 61/18866 | 0.3140145 | 0.5902856 | 0.5341114 | 9  | C3AR1/MIR140/CCR2/MIR199A1/TGFB1/CXCL17/MIR199A2/NODAL/NDRG2                 |
| Biological Process | GO:0045843 | negative regulation of striated muscle tissue development      | 9/2279  | 61/18866 | 0.3140145 | 0.5902856 | 0.5341114 | 9  | CTDP1/MIR199A1/VGLL4/TGFBR2/DLL1/RIPK1/TGFB1/MEIS1/MIR199A2                  |
| Biological Process | GO:0046888 | negative regulation of hormone secretion                       | 9/2279  | 61/18866 | 0.3140145 | 0.5902856 | 0.5341114 | 9  | RAB11FIP1/CRHBP/ENY2/GHRL/KLF7/SREBF1/INHBA/LIF/PRKN                         |
| Biological Process | GO:0051310 | metaphase plate congression                                    | 9/2279  | 61/18866 | 0.3140145 | 0.5902856 | 0.5341114 | 9  | MAD1L1/DYNC1H1/CHAMP1/CUL3/MIS12/DCTN2/NUMA1/CDCA5/SPAG5                     |
| Biological Process | GO:1903078 | positive regulation of protein localization to plasma membrane | 9/2279  | 61/18866 | 0.3140145 | 0.5902856 | 0.5341114 | 9  | PIK3R1/RHOG/TNF/ZDHHC2/AKAP5/PRKCH/PRKCI/PRKCE/EZR                           |
| Biological Process | GO:2000756 | regulation of peptidyl-lysine acetylation                      | 9/2279  | 61/18866 | 0.3140145 | 0.5902856 | 0.5341114 | 9  | ARRB1/RPS6KA4/SPHK2/CTBP1/PIH1D1/KAT7/LIF/PAXIP1/PRKAA1                      |

|                    |            |                                               |         |           |           |           |           |    |                                                                                                                                                                         |
|--------------------|------------|-----------------------------------------------|---------|-----------|-----------|-----------|-----------|----|-------------------------------------------------------------------------------------------------------------------------------------------------------------------------|
| Biological Process | GO:0051260 | protein homooligomerization                   | 24/2279 | 178/18866 | 0.3141906 | 0.5902856 | 0.5341114 | 24 | TRPM2/NLRC4/EHD1/BLM/ACOT13/SLC1A5/KCTD7/NACC2/CRTC3/SLC1A2/ACACB/RNF213/UPB1/KCTD2/KCTD15/ACACA/TP53BP1/IKZF4/MAT1A/ATL1/KCTD1/ALDH1A2/TK1/KCTD2<br>1                  |
| Biological Process | GO:0050770 | regulation of axonogenesis                    | 25/2279 | 186/18866 | 0.3151782 | 0.5902856 | 0.5341114 | 25 | SEMA6B/PLXNC1/KIF13B/CTTN/DNM2/ZEB2/EPHB3/SEMA4A/RTN4/DISC1/SEMA4B/IFRD1/ILK/SYNGAP1/SEMA4D/ZSWIM5/CDH4/SIPA1L1/CDKL3/MARK2/CYFIP1/TRPV2/NDEL1/DB<br>NL/SPART           |
| Biological Process | GO:0003206 | cardiac chamber morphogenesis                 | 18/2279 | 131/18866 | 0.3166103 | 0.5902856 | 0.5341114 | 18 | ZFPM1/RXRA/NRP2/GJA5/CCM2L/TGFBR2/RBPJ/SMAD7/WNT11/TGFB1/RARA/GRHL2/ENG/NOTCH1/MEF2C/FHL2/SLIT3/NSD2                                                                    |
| Biological Process | GO:0046887 | positive regulation of hormone secretion      | 18/2279 | 131/18866 | 0.3166103 | 0.5902856 | 0.5341114 | 18 | NADK/C1QTNF3/MYRIP/CREB1/MYB/ARRB1/GPLD1/ITSN1/TCF7L2/FGFR1/GIPR/BLK/GHRL/PRKCE/RPH3AL/INHBA/C2CD2L/SIRT3                                                               |
| Biological Process | GO:0009746 | response to hexose                            | 27/2279 | 202/18866 | 0.3168171 | 0.5902856 | 0.5341114 | 27 | NADK/SLC2A5/LRP5L/ERN1/SLC8A1/ARRB1/GPLD1/EIF2B5/TGFBR2/THBS1/TCF7L2/IGF1R/PTPRN2/PAX2/ENY2/GIPR/GHRL/KLF7/FIS1/PIH1D1/PRKCE/CPB2/PCK2/SREBF1/SLC29A1/C<br>2CD2L/PRKAA1 |
| Biological Process | GO:0006363 | termination of RNA polymerase I transcription | 5/2279  | 31/18866  | 0.3178026 | 0.5902856 | 0.5341114 | 5  | TAF1C/POLR2F/CCNH/TAF1D/ERCC2                                                                                                                                           |
| Biological Process | GO:0009394 | 2'-deoxyribonucleotide metabolic process      | 5/2279  | 31/18866  | 0.3178026 | 0.5902856 | 0.5341114 | 5  | UNG/NTHL1/GUK1/AK5/DCTD                                                                                                                                                 |
| Biological Process | GO:0010644 | cell communication by electrical coupling     | 5/2279  | 31/18866  | 0.3178026 | 0.5902856 | 0.5341114 | 5  | PDE4D/CASQ2/CACNA1C/SLC8A1/GJA5                                                                                                                                         |
| Biological Process | GO:0018200 | peptidyl-glutamic acid modification           | 5/2279  | 31/18866  | 0.3178026 | 0.5902856 | 0.5341114 | 5  | AGBL5/TLL4/TLL11/TLL1/AGBL2                                                                                                                                             |

|                    |            |                                                 |        |          |           |           |           |   |                                   |
|--------------------|------------|-------------------------------------------------|--------|----------|-----------|-----------|-----------|---|-----------------------------------|
| Biological Process | GO:0032770 | positive regulation of monooxygenase activity   | 5/2279 | 31/18866 | 0.3178026 | 0.5902856 | 0.5341114 | 5 | VDR/TNF/NOS1AP/CDH3/POR           |
| Biological Process | GO:0034368 | protein-lipid complex remodeling                | 5/2279 | 31/18866 | 0.3178026 | 0.5902856 | 0.5341114 | 5 | MPO/LIPC/ABCG1/PLTP/AGTR1         |
| Biological Process | GO:0034369 | plasma lipoprotein particle remodeling          | 5/2279 | 31/18866 | 0.3178026 | 0.5902856 | 0.5341114 | 5 | MPO/LIPC/ABCG1/PLTP/AGTR1         |
| Biological Process | GO:0034377 | plasma lipoprotein particle assembly            | 5/2279 | 31/18866 | 0.3178026 | 0.5902856 | 0.5341114 | 5 | P4HB/MFSD2A/PLAGL2/NR1H2/ABCA1    |
| Biological Process | GO:0045948 | positive regulation of translational initiation | 5/2279 | 31/18866 | 0.3178026 | 0.5902856 | 0.5341114 | 5 | RXRA/TNF/CCL5/EIF2B5/LARP1        |
| Biological Process | GO:0046856 | phosphatidylinositol dephosphorylation          | 5/2279 | 31/18866 | 0.3178026 | 0.5902856 | 0.5341114 | 5 | SYNJ2/INPP5A/INPP5D/INPP5E/INPP5F |
| Biological Process | GO:0060325 | face morphogenesis                              | 5/2279 | 31/18866 | 0.3178026 | 0.5902856 | 0.5341114 | 5 | ARID5B/CRISPLD2/SKI/ANKRD11/ASPH  |
| Biological Process | GO:0061037 | negative regulation of cartilage development    | 5/2279 | 31/18866 | 0.3178026 | 0.5902856 | 0.5341114 | 5 | WNT11/RARA/RARG/RFLNA/CCN4        |
| Biological Process | GO:0071539 | protein localization to centrosome              | 5/2279 | 31/18866 | 0.3178026 | 0.5902856 | 0.5341114 | 5 | CSNK1D/DISC1/DCTN2/SPAG5/CEP72    |



|                    |            |                                                                                        |         |          |           |           |           |    |                                                              |
|--------------------|------------|----------------------------------------------------------------------------------------|---------|----------|-----------|-----------|-----------|----|--------------------------------------------------------------|
| Biological Process | GO:1902230 | negative regulation of intrinsic apoptotic signaling pathway in response to DNA damage | 5/2279  | 31/18866 | 0.3178026 | 0.5902856 | 0.5341114 | 5  | ZNF385A/CLU/BCL2/BCL2L1/MARCHF7                              |
| Biological Process | GO:0001754 | eye photoreceptor cell differentiation                                                 | 7/2279  | 46/18866 | 0.3179027 | 0.5902856 | 0.5341114 | 7  | CRB1/GNAT2/PRKCI/RPGRI1/SDK2/NRL/CABP4                       |
| Biological Process | GO:0032570 | response to progesterone                                                               | 7/2279  | 46/18866 | 0.3179027 | 0.5902856 | 0.5341114 | 7  | THBS1/TGFB1/NCOA1/UBE3A/NCOA2/SREBF1/RELA                    |
| Biological Process | GO:0038202 | TORC1 signaling                                                                        | 7/2279  | 46/18866 | 0.3179027 | 0.5902856 | 0.5341114 | 7  | RPTOR/LARP1/DGKQ/CLEC16A/SIK3/SEC13/PIH1D1                   |
| Biological Process | GO:0045023 | G0 to G1 transition                                                                    | 7/2279  | 46/18866 | 0.3179027 | 0.5902856 | 0.5341114 | 7  | TFDP1/MGA/EHMT2/EPC1/PHC3/E2F6/RHNO1                         |
| Biological Process | GO:1904407 | positive regulation of nitric oxide metabolic process                                  | 7/2279  | 46/18866 | 0.3179027 | 0.5902856 | 0.5341114 | 7  | SMAD3/DNM2/TNF/NOS1AP/CLU/HBB/ITGB2                          |
| Biological Process | GO:0006513 | protein monoubiquitination                                                             | 10/2279 | 69/18866 | 0.3196753 | 0.5902856 | 0.5341114 | 10 | MGRN1/CUL3/UHRF1/UBE2O/ZNF598/PCGF3/NEDD4/RNF40/PRKN/MARCHF7 |
| Biological Process | GO:0042698 | ovulation cycle                                                                        | 10/2279 | 69/18866 | 0.3196753 | 0.5902856 | 0.5341114 | 10 | NCOR2/MAP2K6/ARRB1/BMPR1B/NCOA1/ETS1/ARRB2/SLIT3/TYRO3/INHBA |
| Biological Process | GO:1903317 | regulation of protein maturation                                                       | 10/2279 | 69/18866 | 0.3196753 | 0.5902856 | 0.5341114 | 10 | CTSZ/NLRC4/ENO1/GSN/THBS1/MYH9/F12/NOL3/CPB2/ANGPTL8         |

|                    |            |                                                                                 |         |           |           |           |           |    |                                                                                                                      |
|--------------------|------------|---------------------------------------------------------------------------------|---------|-----------|-----------|-----------|-----------|----|----------------------------------------------------------------------------------------------------------------------|
| Biological Process | GO:0051592 | response to calcium ion                                                         | 20/2279 | 147/18866 | 0.3199169 | 0.5902856 | 0.5341114 | 20 | TRPM2/CPNE6/CPNE2/TTN/CASQ2/ITPKB/GPLD1/CPNE5/THBS1/CPNE1/CRHBP/GIPR/ADD1/AQP3/MEF2C/SYT17/NEDD4/ANXA7/SEC31A/PRKAA1 |
| Biological Process | GO:1904064 | positive regulation of cation transmembrane transport                           | 20/2279 | 147/18866 | 0.3199169 | 0.5902856 | 0.5341114 | 20 | KCNE1/FXYD1/CCR2/DNM2/TESC/NOS1AP/ACTN4/P2RY6/HTT/KCNQ1/GSTO1/F2R/ANO6/ANK2/PLCG1/PDZK1/CASQ1/FGF14/STIMATE/CRACR2A  |
| Biological Process | GO:0008585 | female gonad development                                                        | 14/2279 | 100/18866 | 0.3199716 | 0.5902856 | 0.5341114 | 14 | ARID5B/BRCA2/ARRB1/EIF2B5/FANCA/BMPR1B/ARRB2/BCL2/DMC1/SLIT3/UBE3A/CEBPB/BCL2L1/INHBA                                |
| Biological Process | GO:0036503 | ERAD pathway                                                                    | 14/2279 | 100/18866 | 0.3199716 | 0.5902856 | 0.5341114 | 14 | AMFR/RHBDD2/UBAC2/EDEM1/HM13/DERL2/UBE2J2/POMT2/EDEM2/NFE2L2/UBXN8/SVIP/MARCHF6/PRKN                                 |
| Biological Process | GO:0000023 | maltose metabolic process                                                       | 1/2279  | 3/18866   | 0.3203981 | 0.5902856 | 0.5341114 | 1  | MGAM                                                                                                                 |
| Biological Process | GO:0000103 | sulfate assimilation                                                            | 1/2279  | 3/18866   | 0.3203981 | 0.5902856 | 0.5341114 | 1  | PAPSS2                                                                                                               |
| Biological Process | GO:0000430 | regulation of transcription from RNA polymerase II promoter by glucose          | 1/2279  | 3/18866   | 0.3203981 | 0.5902856 | 0.5341114 | 1  | USF2                                                                                                                 |
| Biological Process | GO:0000432 | positive regulation of transcription from RNA polymerase II promoter by glucose | 1/2279  | 3/18866   | 0.3203981 | 0.5902856 | 0.5341114 | 1  | USF2                                                                                                                 |
| Biological Process | GO:0000494 | box C/D snoRNA 3'-end processing                                                | 1/2279  | 3/18866   | 0.3203981 | 0.5902856 | 0.5341114 | 1  | FBL                                                                                                                  |

|                    |            |                                                            |        |         |           |           |           |   |         |
|--------------------|------------|------------------------------------------------------------|--------|---------|-----------|-----------|-----------|---|---------|
| Biological Process | GO:0000711 | meiotic DNA repair synthesis                               | 1/2279 | 3/18866 | 0.3203981 | 0.5902856 | 0.5341114 | 1 | TEX12   |
| Biological Process | GO:0000962 | positive regulation of mitochondrial RNA catabolic process | 1/2279 | 3/18866 | 0.3203981 | 0.5902856 | 0.5341114 | 1 | GRSF1   |
| Biological Process | GO:0001172 | transcription, RNA-templated                               | 1/2279 | 3/18866 | 0.3203981 | 0.5902856 | 0.5341114 | 1 | RMRP    |
| Biological Process | GO:0001550 | ovarian cumulus expansion                                  | 1/2279 | 3/18866 | 0.3203981 | 0.5902856 | 0.5341114 | 1 | BMPR1B  |
| Biological Process | GO:0001555 | oocyte growth                                              | 1/2279 | 3/18866 | 0.3203981 | 0.5902856 | 0.5341114 | 1 | KMT2D   |
| Biological Process | GO:0001807 | regulation of type IV hypersensitivity                     | 1/2279 | 3/18866 | 0.3203981 | 0.5902856 | 0.5341114 | 1 | FUT7    |
| Biological Process | GO:0001905 | activation of membrane attack complex                      | 1/2279 | 3/18866 | 0.3203981 | 0.5902856 | 0.5341114 | 1 | CD59    |
| Biological Process | GO:0001922 | B-1 B cell homeostasis                                     | 1/2279 | 3/18866 | 0.3203981 | 0.5902856 | 0.5341114 | 1 | TNFAIP3 |
| Biological Process | GO:0001951 | intestinal D-glucose absorption                            | 1/2279 | 3/18866 | 0.3203981 | 0.5902856 | 0.5341114 | 1 | EZR     |

|                    |            |                                                               |        |         |           |           |           |   |        |
|--------------------|------------|---------------------------------------------------------------|--------|---------|-----------|-----------|-----------|---|--------|
| Biological Process | GO:0001969 | regulation of activation of membrane attack complex           | 1/2279 | 3/18866 | 0.3203981 | 0.5902856 | 0.5341114 | 1 | CD59   |
| Biological Process | GO:0002071 | glandular epithelial cell maturation                          | 1/2279 | 3/18866 | 0.3203981 | 0.5902856 | 0.5341114 | 1 | RFX3   |
| Biological Process | GO:0002191 | cap-dependent translational initiation                        | 1/2279 | 3/18866 | 0.3203981 | 0.5902856 | 0.5341114 | 1 | EIF4G1 |
| Biological Process | GO:0002254 | kinin cascade                                                 | 1/2279 | 3/18866 | 0.3203981 | 0.5902856 | 0.5341114 | 1 | F12    |
| Biological Process | GO:0002266 | follicular dendritic cell activation                          | 1/2279 | 3/18866 | 0.3203981 | 0.5902856 | 0.5341114 | 1 | BCL3   |
| Biological Process | GO:0002276 | basophil activation involved in immune response               | 1/2279 | 3/18866 | 0.3203981 | 0.5902856 | 0.5341114 | 1 | PI4K2A |
| Biological Process | GO:0002277 | myeloid dendritic cell activation involved in immune response | 1/2279 | 3/18866 | 0.3203981 | 0.5902856 | 0.5341114 | 1 | DOCK2  |
| Biological Process | GO:0002351 | serotonin production involved in inflammatory response        | 1/2279 | 3/18866 | 0.3203981 | 0.5902856 | 0.5341114 | 1 | P2RX1  |
| Biological Process | GO:0002353 | plasma kallikrein-kinin cascade                               | 1/2279 | 3/18866 | 0.3203981 | 0.5902856 | 0.5341114 | 1 | F12    |

|                    |            |                                                                                                                  |        |         |           |           |           |   |          |
|--------------------|------------|------------------------------------------------------------------------------------------------------------------|--------|---------|-----------|-----------|-----------|---|----------|
| Biological Process | GO:0002436 | immune complex clearance by monocytes and macrophages                                                            | 1/2279 | 3/18866 | 0.3203981 | 0.5902856 | 0.5341114 | 1 | CCR2     |
| Biological Process | GO:0002442 | serotonin secretion involved in inflammatory response                                                            | 1/2279 | 3/18866 | 0.3203981 | 0.5902856 | 0.5341114 | 1 | P2RX1    |
| Biological Process | GO:0002477 | antigen processing and presentation of exogenous peptide antigen via MHC class Ib                                | 1/2279 | 3/18866 | 0.3203981 | 0.5902856 | 0.5341114 | 1 | HLA-F    |
| Biological Process | GO:0002514 | B cell tolerance induction                                                                                       | 1/2279 | 3/18866 | 0.3203981 | 0.5902856 | 0.5341114 | 1 | TGFBR2   |
| Biological Process | GO:0002541 | activation of plasma proteins involved in acute inflammatory response                                            | 1/2279 | 3/18866 | 0.3203981 | 0.5902856 | 0.5341114 | 1 | F12      |
| Biological Process | GO:0002554 | serotonin secretion by platelet                                                                                  | 1/2279 | 3/18866 | 0.3203981 | 0.5902856 | 0.5341114 | 1 | P2RX1    |
| Biological Process | GO:0002581 | negative regulation of antigen processing and presentation of peptide or polysaccharide antigen via MHC class II | 1/2279 | 3/18866 | 0.3203981 | 0.5902856 | 0.5341114 | 1 | THBS1    |
| Biological Process | GO:0002636 | positive regulation of germinal center formation                                                                 | 1/2279 | 3/18866 | 0.3203981 | 0.5902856 | 0.5341114 | 1 | TNFSF13B |
| Biological Process | GO:0002904 | positive regulation of B cell apoptotic process                                                                  | 1/2279 | 3/18866 | 0.3203981 | 0.5902856 | 0.5341114 | 1 | IL10     |

|                    |            |                                                                        |        |         |           |           |           |   |        |
|--------------------|------------|------------------------------------------------------------------------|--------|---------|-----------|-----------|-----------|---|--------|
| Biological Process | GO:0002941 | synoviocyte proliferation                                              | 1/2279 | 3/18866 | 0.3203981 | 0.5902856 | 0.5341114 | 1 | TNF    |
| Biological Process | GO:0003249 | cell proliferation involved in heart valve morphogenesis               | 1/2279 | 3/18866 | 0.3203981 | 0.5902856 | 0.5341114 | 1 | NOTCH1 |
| Biological Process | GO:0003250 | regulation of cell proliferation involved in heart valve morphogenesis | 1/2279 | 3/18866 | 0.3203981 | 0.5902856 | 0.5341114 | 1 | NOTCH1 |
| Biological Process | GO:0003285 | septum secundum development                                            | 1/2279 | 3/18866 | 0.3203981 | 0.5902856 | 0.5341114 | 1 | NSD2   |
| Biological Process | GO:0003331 | positive regulation of extracellular matrix constituent secretion      | 1/2279 | 3/18866 | 0.3203981 | 0.5902856 | 0.5341114 | 1 | CPB2   |
| Biological Process | GO:0005988 | lactose metabolic process                                              | 1/2279 | 3/18866 | 0.3203981 | 0.5902856 | 0.5341114 | 1 | SLC2A1 |
| Biological Process | GO:0005989 | lactose biosynthetic process                                           | 1/2279 | 3/18866 | 0.3203981 | 0.5902856 | 0.5341114 | 1 | SLC2A1 |
| Biological Process | GO:0006021 | inositol biosynthetic process                                          | 1/2279 | 3/18866 | 0.3203981 | 0.5902856 | 0.5341114 | 1 | IMPA2  |
| Biological Process | GO:0006046 | N-acetylglucosamine catabolic process                                  | 1/2279 | 3/18866 | 0.3203981 | 0.5902856 | 0.5341114 | 1 | AMDHD2 |

|                    |            |                                         |        |         |           |           |           |   |        |
|--------------------|------------|-----------------------------------------|--------|---------|-----------|-----------|-----------|---|--------|
| Biological Process | GO:0006208 | pyrimidine nucleobase catabolic process | 1/2279 | 3/18866 | 0.3203981 | 0.5902856 | 0.5341114 | 1 | DPYS   |
| Biological Process | GO:0006210 | thymine catabolic process               | 1/2279 | 3/18866 | 0.3203981 | 0.5902856 | 0.5341114 | 1 | DPYS   |
| Biological Process | GO:0006211 | 5-methylcytosine catabolic process      | 1/2279 | 3/18866 | 0.3203981 | 0.5902856 | 0.5341114 | 1 | TET2   |
| Biological Process | GO:0006226 | dUMP biosynthetic process               | 1/2279 | 3/18866 | 0.3203981 | 0.5902856 | 0.5341114 | 1 | DCTD   |
| Biological Process | GO:0006231 | dTMP biosynthetic process               | 1/2279 | 3/18866 | 0.3203981 | 0.5902856 | 0.5341114 | 1 | DCTD   |
| Biological Process | GO:0006311 | meiotic gene conversion                 | 1/2279 | 3/18866 | 0.3203981 | 0.5902856 | 0.5341114 | 1 | RNF212 |
| Biological Process | GO:0006404 | RNA import into nucleus                 | 1/2279 | 3/18866 | 0.3203981 | 0.5902856 | 0.5341114 | 1 | SNUPN  |
| Biological Process | GO:0006667 | sphinganine metabolic process           | 1/2279 | 3/18866 | 0.3203981 | 0.5902856 | 0.5341114 | 1 | SPTLC2 |
| Biological Process | GO:0006683 | galactosylceramide catabolic process    | 1/2279 | 3/18866 | 0.3203981 | 0.5902856 | 0.5341114 | 1 | GALC   |

|                    |            |                                                                                       |        |         |           |           |           |   |         |
|--------------------|------------|---------------------------------------------------------------------------------------|--------|---------|-----------|-----------|-----------|---|---------|
| Biological Process | GO:0006741 | NADP biosynthetic process                                                             | 1/2279 | 3/18866 | 0.3203981 | 0.5902856 | 0.5341114 | 1 | NADK    |
| Biological Process | GO:0006808 | regulation of nitrogen utilization                                                    | 1/2279 | 3/18866 | 0.3203981 | 0.5902856 | 0.5341114 | 1 | BCL2    |
| Biological Process | GO:0007207 | phospholipase C-activating G protein-coupled acetylcholine receptor signaling pathway | 1/2279 | 3/18866 | 0.3203981 | 0.5902856 | 0.5341114 | 1 | CHRM2   |
| Biological Process | GO:0007228 | positive regulation of hh target transcription factor activity                        | 1/2279 | 3/18866 | 0.3203981 | 0.5902856 | 0.5341114 | 1 | STK36   |
| Biological Process | GO:0007619 | courtship behavior                                                                    | 1/2279 | 3/18866 | 0.3203981 | 0.5902856 | 0.5341114 | 1 | HEXB    |
| Biological Process | GO:0008292 | acetylcholine biosynthetic process                                                    | 1/2279 | 3/18866 | 0.3203981 | 0.5902856 | 0.5341114 | 1 | SLC44A4 |
| Biological Process | GO:0008315 | G2/M1 transition of meiotic cell cycle                                                | 1/2279 | 3/18866 | 0.3203981 | 0.5902856 | 0.5341114 | 1 | CDC25A  |
| Biological Process | GO:0009158 | ribonucleoside monophosphate catabolic process                                        | 1/2279 | 3/18866 | 0.3203981 | 0.5902856 | 0.5341114 | 1 | AMPD3   |
| Biological Process | GO:0009169 | purine ribonucleoside monophosphate catabolic process                                 | 1/2279 | 3/18866 | 0.3203981 | 0.5902856 | 0.5341114 | 1 | AMPD3   |



|                    |            |                                                            |        |         |           |           |           |   |         |
|--------------------|------------|------------------------------------------------------------|--------|---------|-----------|-----------|-----------|---|---------|
| Biological Process | GO:0009170 | purine deoxyribonucleoside monophosphate metabolic process | 1/2279 | 3/18866 | 0.3203981 | 0.5902856 | 0.5341114 | 1 | GUK1    |
| Biological Process | GO:0009397 | folic acid-containing compound catabolic process           | 1/2279 | 3/18866 | 0.3203981 | 0.5902856 | 0.5341114 | 1 | MTHFS   |
| Biological Process | GO:0009447 | putrescine catabolic process                               | 1/2279 | 3/18866 | 0.3203981 | 0.5902856 | 0.5341114 | 1 | SAT2    |
| Biological Process | GO:0009449 | gamma-aminobutyric acid biosynthetic process               | 1/2279 | 3/18866 | 0.3203981 | 0.5902856 | 0.5341114 | 1 | SLC1A3  |
| Biological Process | GO:0009631 | cold acclimation                                           | 1/2279 | 3/18866 | 0.3203981 | 0.5902856 | 0.5341114 | 1 | PRKAA1  |
| Biological Process | GO:0009726 | detection of endogenous stimulus                           | 1/2279 | 3/18866 | 0.3203981 | 0.5902856 | 0.5341114 | 1 | PKD1L1  |
| Biological Process | GO:0009946 | proximal/distal axis specification                         | 1/2279 | 3/18866 | 0.3203981 | 0.5902856 | 0.5341114 | 1 | NODAL   |
| Biological Process | GO:0009957 | epidermal cell fate specification                          | 1/2279 | 3/18866 | 0.3203981 | 0.5902856 | 0.5341114 | 1 | RBPJ    |
| Biological Process | GO:0010133 | proline catabolic process to glutamate                     | 1/2279 | 3/18866 | 0.3203981 | 0.5902856 | 0.5341114 | 1 | ALDH4A1 |

|                    |            |                                                                           |        |         |           |           |           |   |       |
|--------------------|------------|---------------------------------------------------------------------------|--------|---------|-----------|-----------|-----------|---|-------|
| Biological Process | GO:0010446 | response to alkaline pH                                                   | 1/2279 | 3/18866 | 0.3203981 | 0.5902856 | 0.5341114 | 1 | INSRR |
| Biological Process | GO:0010621 | negative regulation of transcription by transcription factor localization | 1/2279 | 3/18866 | 0.3203981 | 0.5902856 | 0.5341114 | 1 | HHEX  |
| Biological Process | GO:0010643 | cell communication by chemical coupling                                   | 1/2279 | 3/18866 | 0.3203981 | 0.5902856 | 0.5341114 | 1 | GJA5  |
| Biological Process | GO:0010751 | negative regulation of nitric oxide mediated signal transduction          | 1/2279 | 3/18866 | 0.3203981 | 0.5902856 | 0.5341114 | 1 | THBS1 |
| Biological Process | GO:0010956 | negative regulation of calcidiol 1-monooxygenase activity                 | 1/2279 | 3/18866 | 0.3203981 | 0.5902856 | 0.5341114 | 1 | GFI1  |
| Biological Process | GO:0010979 | regulation of vitamin D 24-hydroxylase activity                           | 1/2279 | 3/18866 | 0.3203981 | 0.5902856 | 0.5341114 | 1 | VDR   |
| Biological Process | GO:0010980 | positive regulation of vitamin D 24-hydroxylase activity                  | 1/2279 | 3/18866 | 0.3203981 | 0.5902856 | 0.5341114 | 1 | VDR   |
| Biological Process | GO:0014011 | Schwann cell proliferation involved in axon regeneration                  | 1/2279 | 3/18866 | 0.3203981 | 0.5902856 | 0.5341114 | 1 | CERS2 |
| Biological Process | GO:0014040 | positive regulation of Schwann cell differentiation                       | 1/2279 | 3/18866 | 0.3203981 | 0.5902856 | 0.5341114 | 1 | RELA  |

|                    |            |                                                 |        |         |           |           |           |   |            |
|--------------------|------------|-------------------------------------------------|--------|---------|-----------|-----------|-----------|---|------------|
| Biological Process | GO:0014043 | negative regulation of neuron maturation        | 1/2279 | 3/18866 | 0.3203981 | 0.5902856 | 0.5341114 | 1 | BCL11A     |
| Biological Process | GO:0015891 | siderophore transport                           | 1/2279 | 3/18866 | 0.3203981 | 0.5902856 | 0.5341114 | 1 | LCN2       |
| Biological Process | GO:0019050 | suppression by virus of host apoptotic process  | 1/2279 | 3/18866 | 0.3203981 | 0.5902856 | 0.5341114 | 1 | BCL2L1     |
| Biological Process | GO:0019082 | viral protein processing                        | 1/2279 | 3/18866 | 0.3203981 | 0.5902856 | 0.5341114 | 1 | SPCS1      |
| Biological Process | GO:0019249 | lactate biosynthetic process                    | 1/2279 | 3/18866 | 0.3203981 | 0.5902856 | 0.5341114 | 1 | PER2       |
| Biological Process | GO:0019254 | carnitine metabolic process, CoA-linked         | 1/2279 | 3/18866 | 0.3203981 | 0.5902856 | 0.5341114 | 1 | ACADM      |
| Biological Process | GO:0019276 | UDP-N-acetylgalactosamine metabolic process     | 1/2279 | 3/18866 | 0.3203981 | 0.5902856 | 0.5341114 | 1 | CSGALNACT1 |
| Biological Process | GO:0019343 | cysteine biosynthetic process via cystathionine | 1/2279 | 3/18866 | 0.3203981 | 0.5902856 | 0.5341114 | 1 | CBS        |
| Biological Process | GO:0019857 | 5-methylcytosine metabolic process              | 1/2279 | 3/18866 | 0.3203981 | 0.5902856 | 0.5341114 | 1 | TET2       |

|                    |            |                                                                                           |        |         |           |           |           |   |       |
|--------------------|------------|-------------------------------------------------------------------------------------------|--------|---------|-----------|-----------|-----------|---|-------|
| Biological Process | GO:0019859 | thymine metabolic process                                                                 | 1/2279 | 3/18866 | 0.3203981 | 0.5902856 | 0.5341114 | 1 | DPYS  |
| Biological Process | GO:0019860 | uracil metabolic process                                                                  | 1/2279 | 3/18866 | 0.3203981 | 0.5902856 | 0.5341114 | 1 | DPYS  |
| Biological Process | GO:0021553 | olfactory nerve development                                                               | 1/2279 | 3/18866 | 0.3203981 | 0.5902856 | 0.5341114 | 1 | NTRK1 |
| Biological Process | GO:0021747 | cochlear nucleus development                                                              | 1/2279 | 3/18866 | 0.3203981 | 0.5902856 | 0.5341114 | 1 | BCL2  |
| Biological Process | GO:0021775 | smoothened signaling pathway involved in ventral spinal cord interneuron specification    | 1/2279 | 3/18866 | 0.3203981 | 0.5902856 | 0.5341114 | 1 | SUFU  |
| Biological Process | GO:0021776 | smoothened signaling pathway involved in spinal cord motor neuron cell fate specification | 1/2279 | 3/18866 | 0.3203981 | 0.5902856 | 0.5341114 | 1 | SUFU  |
| Biological Process | GO:0021828 | gonadotrophin-releasing hormone neuronal migration to the hypothalamus                    | 1/2279 | 3/18866 | 0.3203981 | 0.5902856 | 0.5341114 | 1 | NRP2  |
| Biological Process | GO:0021847 | ventricular zone neuroblast division                                                      | 1/2279 | 3/18866 | 0.3203981 | 0.5902856 | 0.5341114 | 1 | FGFR1 |
| Biological Process | GO:0021849 | neuroblast division in subventricular zone                                                | 1/2279 | 3/18866 | 0.3203981 | 0.5902856 | 0.5341114 | 1 | NUMB  |

|                    |            |                                                                 |        |         |           |           |           |   |         |
|--------------------|------------|-----------------------------------------------------------------|--------|---------|-----------|-----------|-----------|---|---------|
| Biological Process | GO:0021856 | hypothalamic tangential migration using cell-axon interactions  | 1/2279 | 3/18866 | 0.3203981 | 0.5902856 | 0.5341114 | 1 | NRP2    |
| Biological Process | GO:0030382 | sperm mitochondrion organization                                | 1/2279 | 3/18866 | 0.3203981 | 0.5902856 | 0.5341114 | 1 | MFSD14A |
| Biological Process | GO:0030846 | termination of RNA polymerase II transcription, poly(A)-coupled | 1/2279 | 3/18866 | 0.3203981 | 0.5902856 | 0.5341114 | 1 | SCAF8   |
| Biological Process | GO:0030886 | negative regulation of myeloid dendritic cell activation        | 1/2279 | 3/18866 | 0.3203981 | 0.5902856 | 0.5341114 | 1 | IL10    |
| Biological Process | GO:0031335 | regulation of sulfur amino acid metabolic process               | 1/2279 | 3/18866 | 0.3203981 | 0.5902856 | 0.5341114 | 1 | COMT    |
| Biological Process | GO:0032238 | adenosine transport                                             | 1/2279 | 3/18866 | 0.3203981 | 0.5902856 | 0.5341114 | 1 | SLC29A1 |
| Biological Process | GO:0032484 | Ral protein signal transduction                                 | 1/2279 | 3/18866 | 0.3203981 | 0.5902856 | 0.5341114 | 1 | RALGPS1 |
| Biological Process | GO:0032485 | regulation of Ral protein signal transduction                   | 1/2279 | 3/18866 | 0.3203981 | 0.5902856 | 0.5341114 | 1 | RALGPS1 |
| Biological Process | GO:0032619 | interleukin-16 production                                       | 1/2279 | 3/18866 | 0.3203981 | 0.5902856 | 0.5341114 | 1 | MIR145  |

|                    |            |                                                                                        |        |         |           |           |           |   |         |
|--------------------|------------|----------------------------------------------------------------------------------------|--------|---------|-----------|-----------|-----------|---|---------|
| Biological Process | GO:0032659 | regulation of interleukin-16 production                                                | 1/2279 | 3/18866 | 0.3203981 | 0.5902856 | 0.5341114 | 1 | MIR145  |
| Biological Process | GO:0032730 | positive regulation of interleukin-1 alpha production                                  | 1/2279 | 3/18866 | 0.3203981 | 0.5902856 | 0.5341114 | 1 | IL16    |
| Biological Process | GO:0032765 | positive regulation of mast cell cytokine production                                   | 1/2279 | 3/18866 | 0.3203981 | 0.5902856 | 0.5341114 | 1 | BCL10   |
| Biological Process | GO:0032824 | negative regulation of natural killer cell differentiation                             | 1/2279 | 3/18866 | 0.3203981 | 0.5902856 | 0.5341114 | 1 | PGLYRP1 |
| Biological Process | GO:0032827 | negative regulation of natural killer cell differentiation involved in immune response | 1/2279 | 3/18866 | 0.3203981 | 0.5902856 | 0.5341114 | 1 | PGLYRP1 |
| Biological Process | GO:0033076 | isoquinoline alkaloid metabolic process                                                | 1/2279 | 3/18866 | 0.3203981 | 0.5902856 | 0.5341114 | 1 | DDC     |
| Biological Process | GO:0033140 | negative regulation of peptidyl-serine phosphorylation of STAT protein                 | 1/2279 | 3/18866 | 0.3203981 | 0.5902856 | 0.5341114 | 1 | GGNBP2  |
| Biological Process | GO:0033227 | dsRNA transport                                                                        | 1/2279 | 3/18866 | 0.3203981 | 0.5902856 | 0.5341114 | 1 | FLOT1   |
| Biological Process | GO:0033387 | putrescine biosynthetic process from ornithine                                         | 1/2279 | 3/18866 | 0.3203981 | 0.5902856 | 0.5341114 | 1 | ODC1    |

|                    |            |                                                                         |        |         |           |           |           |   |         |
|--------------------|------------|-------------------------------------------------------------------------|--------|---------|-----------|-----------|-----------|---|---------|
| Biological Process | GO:0033563 | dorsal/ventral axon guidance                                            | 1/2279 | 3/18866 | 0.3203981 | 0.5902856 | 0.5341114 | 1 | SLIT1   |
| Biological Process | GO:0033624 | negative regulation of integrin activation                              | 1/2279 | 3/18866 | 0.3203981 | 0.5902856 | 0.5341114 | 1 | JAM3    |
| Biological Process | GO:0033693 | neurofilament bundle assembly                                           | 1/2279 | 3/18866 | 0.3203981 | 0.5902856 | 0.5341114 | 1 | NEFM    |
| Biological Process | GO:0033967 | box C/D snoRNA metabolic process                                        | 1/2279 | 3/18866 | 0.3203981 | 0.5902856 | 0.5341114 | 1 | FBL     |
| Biological Process | GO:0034092 | negative regulation of maintenance of sister chromatid cohesion         | 1/2279 | 3/18866 | 0.3203981 | 0.5902856 | 0.5341114 | 1 | TNKS    |
| Biological Process | GO:0034140 | negative regulation of toll-like receptor 3 signaling pathway           | 1/2279 | 3/18866 | 0.3203981 | 0.5902856 | 0.5341114 | 1 | TNFAIP3 |
| Biological Process | GO:0034183 | negative regulation of maintenance of mitotic sister chromatid cohesion | 1/2279 | 3/18866 | 0.3203981 | 0.5902856 | 0.5341114 | 1 | TNKS    |
| Biological Process | GO:0034963 | box C/D snoRNA processing                                               | 1/2279 | 3/18866 | 0.3203981 | 0.5902856 | 0.5341114 | 1 | FBL     |
| Biological Process | GO:0035166 | post-embryonic hemopoiesis                                              | 1/2279 | 3/18866 | 0.3203981 | 0.5902856 | 0.5341114 | 1 | ERCC1   |

|                    |            |                                                          |        |         |           |           |           |   |        |
|--------------------|------------|----------------------------------------------------------|--------|---------|-----------|-----------|-----------|---|--------|
| Biological Process | GO:0035377 | transepithelial water transport                          | 1/2279 | 3/18866 | 0.3203981 | 0.5902856 | 0.5341114 | 1 | AQP1   |
| Biological Process | GO:0035553 | oxidative single-stranded RNA demethylation              | 1/2279 | 3/18866 | 0.3203981 | 0.5902856 | 0.5341114 | 1 | FTO    |
| Biological Process | GO:0035668 | TRAM-dependent toll-like receptor signaling pathway      | 1/2279 | 3/18866 | 0.3203981 | 0.5902856 | 0.5341114 | 1 | PRKCE  |
| Biological Process | GO:0035669 | TRAM-dependent toll-like receptor 4 signaling pathway    | 1/2279 | 3/18866 | 0.3203981 | 0.5902856 | 0.5341114 | 1 | PRKCE  |
| Biological Process | GO:0035691 | macrophage migration inhibitory factor signaling pathway | 1/2279 | 3/18866 | 0.3203981 | 0.5902856 | 0.5341114 | 1 | ANGPT1 |
| Biological Process | GO:0035898 | parathyroid hormone secretion                            | 1/2279 | 3/18866 | 0.3203981 | 0.5902856 | 0.5341114 | 1 | FGFR1  |
| Biological Process | GO:0035983 | response to trichostatin A                               | 1/2279 | 3/18866 | 0.3203981 | 0.5902856 | 0.5341114 | 1 | MEF2C  |
| Biological Process | GO:0035984 | cellular response to trichostatin A                      | 1/2279 | 3/18866 | 0.3203981 | 0.5902856 | 0.5341114 | 1 | MEF2C  |
| Biological Process | GO:0036112 | medium-chain fatty-acyl-CoA metabolic process            | 1/2279 | 3/18866 | 0.3203981 | 0.5902856 | 0.5341114 | 1 | ACOT7  |



|                    |            |                                                                                                                       |        |         |           |           |           |   |        |
|--------------------|------------|-----------------------------------------------------------------------------------------------------------------------|--------|---------|-----------|-----------|-----------|---|--------|
| Biological Process | GO:0036118 | hyaluronon cable assembly                                                                                             | 1/2279 | 3/18866 | 0.3203981 | 0.5902856 | 0.5341114 | 1 | HAS3   |
| Biological Process | GO:0036215 | response to stem cell factor                                                                                          | 1/2279 | 3/18866 | 0.3203981 | 0.5902856 | 0.5341114 | 1 | FER    |
| Biological Process | GO:0036216 | cellular response to stem cell factor stimulus                                                                        | 1/2279 | 3/18866 | 0.3203981 | 0.5902856 | 0.5341114 | 1 | FER    |
| Biological Process | GO:0036509 | trimming of terminal mannose on B branch                                                                              | 1/2279 | 3/18866 | 0.3203981 | 0.5902856 | 0.5341114 | 1 | EDEM2  |
| Biological Process | GO:0036511 | trimming of first mannose on A branch                                                                                 | 1/2279 | 3/18866 | 0.3203981 | 0.5902856 | 0.5341114 | 1 | EDEM2  |
| Biological Process | GO:0036512 | trimming of second mannose on A branch                                                                                | 1/2279 | 3/18866 | 0.3203981 | 0.5902856 | 0.5341114 | 1 | EDEM2  |
| Biological Process | GO:0038086 | VEGF-activated platelet-derived growth factor receptor signaling pathway                                              | 1/2279 | 3/18866 | 0.3203981 | 0.5902856 | 0.5341114 | 1 | PDGFRB |
| Biological Process | GO:0038091 | positive regulation of cell proliferation by VEGF-activated platelet derived growth factor receptor signaling pathway | 1/2279 | 3/18866 | 0.3203981 | 0.5902856 | 0.5341114 | 1 | PDGFRB |
| Biological Process | GO:0038109 | Kit signaling pathway                                                                                                 | 1/2279 | 3/18866 | 0.3203981 | 0.5902856 | 0.5341114 | 1 | FER    |

|                    |            |                                                             |        |         |           |           |           |   |       |
|--------------------|------------|-------------------------------------------------------------|--------|---------|-----------|-----------|-----------|---|-------|
| Biological Process | GO:0038129 | ERBB3 signaling pathway                                     | 1/2279 | 3/18866 | 0.3203981 | 0.5902856 | 0.5341114 | 1 | RTN4  |
| Biological Process | GO:0038154 | interleukin-11-mediated signaling pathway                   | 1/2279 | 3/18866 | 0.3203981 | 0.5902856 | 0.5341114 | 1 | IL6R  |
| Biological Process | GO:0038183 | bile acid signaling pathway                                 | 1/2279 | 3/18866 | 0.3203981 | 0.5902856 | 0.5341114 | 1 | VDR   |
| Biological Process | GO:0042268 | regulation of cytolysis                                     | 1/2279 | 3/18866 | 0.3203981 | 0.5902856 | 0.5341114 | 1 | TGFB1 |
| Biological Process | GO:0042271 | susceptibility to natural killer cell mediated cytotoxicity | 1/2279 | 3/18866 | 0.3203981 | 0.5902856 | 0.5341114 | 1 | CADM1 |
| Biological Process | GO:0042427 | serotonin biosynthetic process                              | 1/2279 | 3/18866 | 0.3203981 | 0.5902856 | 0.5341114 | 1 | DDC   |
| Biological Process | GO:0042560 | pteridine-containing compound catabolic process             | 1/2279 | 3/18866 | 0.3203981 | 0.5902856 | 0.5341114 | 1 | MTHFS |
| Biological Process | GO:0042819 | vitamin B6 biosynthetic process                             | 1/2279 | 3/18866 | 0.3203981 | 0.5902856 | 0.5341114 | 1 | PDXK  |
| Biological Process | GO:0042822 | pyridoxal phosphate metabolic process                       | 1/2279 | 3/18866 | 0.3203981 | 0.5902856 | 0.5341114 | 1 | PDXK  |

|                    |            |                                                          |        |         |           |           |           |   |        |
|--------------------|------------|----------------------------------------------------------|--------|---------|-----------|-----------|-----------|---|--------|
| Biological Process | GO:0042942 | D-serine transport                                       | 1/2279 | 3/18866 | 0.3203981 | 0.5902856 | 0.5341114 | 1 | SFXN1  |
| Biological Process | GO:0043163 | cell envelope organization                               | 1/2279 | 3/18866 | 0.3203981 | 0.5902856 | 0.5341114 | 1 | TGM3   |
| Biological Process | GO:0043309 | regulation of eosinophil degranulation                   | 1/2279 | 3/18866 | 0.3203981 | 0.5902856 | 0.5341114 | 1 | CCR2   |
| Biological Process | GO:0043316 | cytotoxic T cell degranulation                           | 1/2279 | 3/18866 | 0.3203981 | 0.5902856 | 0.5341114 | 1 | RAB27A |
| Biological Process | GO:0043321 | regulation of natural killer cell degranulation          | 1/2279 | 3/18866 | 0.3203981 | 0.5902856 | 0.5341114 | 1 | HLA-F  |
| Biological Process | GO:0043323 | positive regulation of natural killer cell degranulation | 1/2279 | 3/18866 | 0.3203981 | 0.5902856 | 0.5341114 | 1 | HLA-F  |
| Biological Process | GO:0043385 | mycotoxin metabolic process                              | 1/2279 | 3/18866 | 0.3203981 | 0.5902856 | 0.5341114 | 1 | NFE2L2 |
| Biological Process | GO:0043402 | glucocorticoid mediated signaling pathway                | 1/2279 | 3/18866 | 0.3203981 | 0.5902856 | 0.5341114 | 1 | AKAP13 |
| Biological Process | GO:0043418 | homocysteine catabolic process                           | 1/2279 | 3/18866 | 0.3203981 | 0.5902856 | 0.5341114 | 1 | CBS    |

|                    |            |                                           |        |         |           |           |           |   |         |
|--------------------|------------|-------------------------------------------|--------|---------|-----------|-----------|-----------|---|---------|
| Biological Process | GO:0043456 | regulation of pentose-phosphate shunt     | 1/2279 | 3/18866 | 0.3203981 | 0.5902856 | 0.5341114 | 1 | PGAM1   |
| Biological Process | GO:0043578 | nuclear matrix organization               | 1/2279 | 3/18866 | 0.3203981 | 0.5902856 | 0.5341114 | 1 | SYNE1   |
| Biological Process | GO:0043585 | nose morphogenesis                        | 1/2279 | 3/18866 | 0.3203981 | 0.5902856 | 0.5341114 | 1 | SKI     |
| Biological Process | GO:0043686 | co-translational protein modification     | 1/2279 | 3/18866 | 0.3203981 | 0.5902856 | 0.5341114 | 1 | PDF     |
| Biological Process | GO:0043969 | histone H2B acetylation                   | 1/2279 | 3/18866 | 0.3203981 | 0.5902856 | 0.5341114 | 1 | SPHK2   |
| Biological Process | GO:0043988 | histone H3-S28 phosphorylation            | 1/2279 | 3/18866 | 0.3203981 | 0.5902856 | 0.5341114 | 1 | RPS6KA4 |
| Biological Process | GO:0044026 | DNA hypermethylation                      | 1/2279 | 3/18866 | 0.3203981 | 0.5902856 | 0.5341114 | 1 | MORC1   |
| Biological Process | GO:0044036 | cell wall macromolecule metabolic process | 1/2279 | 3/18866 | 0.3203981 | 0.5902856 | 0.5341114 | 1 | LYG2    |
| Biological Process | GO:0044110 | growth involved in symbiotic interaction  | 1/2279 | 3/18866 | 0.3203981 | 0.5902856 | 0.5341114 | 1 | PGLYRP1 |

|                    |            |                                                    |        |         |           |           |           |   |         |
|--------------------|------------|----------------------------------------------------|--------|---------|-----------|-----------|-----------|---|---------|
| Biological Process | GO:0044117 | growth of symbiont in host                         | 1/2279 | 3/18866 | 0.3203981 | 0.5902856 | 0.5341114 | 1 | PGLYRP1 |
| Biological Process | GO:0044205 | 'de novo' UMP biosynthetic process                 | 1/2279 | 3/18866 | 0.3203981 | 0.5902856 | 0.5341114 | 1 | DHODH   |
| Biological Process | GO:0044211 | CTP salvage                                        | 1/2279 | 3/18866 | 0.3203981 | 0.5902856 | 0.5341114 | 1 | UCK2    |
| Biological Process | GO:0044375 | regulation of peroxisome size                      | 1/2279 | 3/18866 | 0.3203981 | 0.5902856 | 0.5341114 | 1 | PEX11B  |
| Biological Process | GO:0044381 | glucose import in response to insulin stimulus     | 1/2279 | 3/18866 | 0.3203981 | 0.5902856 | 0.5341114 | 1 | ZDHC7   |
| Biological Process | GO:0044467 | glial cell-derived neurotrophic factor secretion   | 1/2279 | 3/18866 | 0.3203981 | 0.5902856 | 0.5341114 | 1 | SORL1   |
| Biological Process | GO:0044830 | modulation by host of viral RNA genome replication | 1/2279 | 3/18866 | 0.3203981 | 0.5902856 | 0.5341114 | 1 | PHB     |
| Biological Process | GO:0045007 | depurination                                       | 1/2279 | 3/18866 | 0.3203981 | 0.5902856 | 0.5341114 | 1 | MUTYH   |
| Biological Process | GO:0045226 | extracellular polysaccharide biosynthetic process  | 1/2279 | 3/18866 | 0.3203981 | 0.5902856 | 0.5341114 | 1 | HAS3    |

|                    |            |                                                                                       |        |         |           |           |           |   |        |
|--------------------|------------|---------------------------------------------------------------------------------------|--------|---------|-----------|-----------|-----------|---|--------|
| Biological Process | GO:0045229 | external encapsulating structure organization                                         | 1/2279 | 3/18866 | 0.3203981 | 0.5902856 | 0.5341114 | 1 | TGM3   |
| Biological Process | GO:0045715 | negative regulation of low-density lipoprotein particle receptor biosynthetic process | 1/2279 | 3/18866 | 0.3203981 | 0.5902856 | 0.5341114 | 1 | ITGB3  |
| Biological Process | GO:0045764 | positive regulation of cellular amino acid metabolic process                          | 1/2279 | 3/18866 | 0.3203981 | 0.5902856 | 0.5341114 | 1 | COMT   |
| Biological Process | GO:0045925 | positive regulation of female receptivity                                             | 1/2279 | 3/18866 | 0.3203981 | 0.5902856 | 0.5341114 | 1 | NCOA1  |
| Biological Process | GO:0045967 | negative regulation of growth rate                                                    | 1/2279 | 3/18866 | 0.3203981 | 0.5902856 | 0.5341114 | 1 | NOTCH1 |
| Biological Process | GO:0046056 | dADP metabolic process                                                                | 1/2279 | 3/18866 | 0.3203981 | 0.5902856 | 0.5341114 | 1 | AK5    |
| Biological Process | GO:0046066 | dGDP metabolic process                                                                | 1/2279 | 3/18866 | 0.3203981 | 0.5902856 | 0.5341114 | 1 | GUK1   |
| Biological Process | GO:0046073 | dTMP metabolic process                                                                | 1/2279 | 3/18866 | 0.3203981 | 0.5902856 | 0.5341114 | 1 | DCTD   |
| Biological Process | GO:0046110 | xanthine metabolic process                                                            | 1/2279 | 3/18866 | 0.3203981 | 0.5902856 | 0.5341114 | 1 | AOX1   |

|                    |            |                                                               |        |         |           |           |           |   |         |
|--------------------|------------|---------------------------------------------------------------|--------|---------|-----------|-----------|-----------|---|---------|
| Biological Process | GO:0046222 | aflatoxin metabolic process                                   | 1/2279 | 3/18866 | 0.3203981 | 0.5902856 | 0.5341114 | 1 | NFE2L2  |
| Biological Process | GO:0046338 | phosphatidylethanolamine catabolic process                    | 1/2279 | 3/18866 | 0.3203981 | 0.5902856 | 0.5341114 | 1 | PLA2G15 |
| Biological Process | GO:0046379 | extracellular polysaccharide metabolic process                | 1/2279 | 3/18866 | 0.3203981 | 0.5902856 | 0.5341114 | 1 | HAS3    |
| Biological Process | GO:0046668 | regulation of retinal cell programmed cell death              | 1/2279 | 3/18866 | 0.3203981 | 0.5902856 | 0.5341114 | 1 | BCL2    |
| Biological Process | GO:0046882 | negative regulation of follicle-stimulating hormone secretion | 1/2279 | 3/18866 | 0.3203981 | 0.5902856 | 0.5341114 | 1 | INHBA   |
| Biological Process | GO:0048165 | fused antrum stage                                            | 1/2279 | 3/18866 | 0.3203981 | 0.5902856 | 0.5341114 | 1 | BMPR1B  |
| Biological Process | GO:0048319 | axial mesoderm morphogenesis                                  | 1/2279 | 3/18866 | 0.3203981 | 0.5902856 | 0.5341114 | 1 | NODAL   |
| Biological Process | GO:0048371 | lateral mesodermal cell differentiation                       | 1/2279 | 3/18866 | 0.3203981 | 0.5902856 | 0.5341114 | 1 | FGFR1   |
| Biological Process | GO:0048633 | positive regulation of skeletal muscle tissue growth          | 1/2279 | 3/18866 | 0.3203981 | 0.5902856 | 0.5341114 | 1 | DLL1    |

|                    |            |                                                              |        |         |           |           |           |   |         |
|--------------------|------------|--------------------------------------------------------------|--------|---------|-----------|-----------|-----------|---|---------|
| Biological Process | GO:0048696 | regulation of collateral sprouting in absence of injury      | 1/2279 | 3/18866 | 0.3203981 | 0.5902856 | 0.5341114 | 1 | SPART   |
| Biological Process | GO:0048769 | sarcomerogenesis                                             | 1/2279 | 3/18866 | 0.3203981 | 0.5902856 | 0.5341114 | 1 | TTN     |
| Biological Process | GO:0048822 | enucleate erythrocyte development                            | 1/2279 | 3/18866 | 0.3203981 | 0.5902856 | 0.5341114 | 1 | MAEA    |
| Biological Process | GO:0048867 | stem cell fate determination                                 | 1/2279 | 3/18866 | 0.3203981 | 0.5902856 | 0.5341114 | 1 | NTF4    |
| Biological Process | GO:0048925 | lateral line system development                              | 1/2279 | 3/18866 | 0.3203981 | 0.5902856 | 0.5341114 | 1 | SLC44A4 |
| Biological Process | GO:0050960 | detection of temperature stimulus involved in thermoception  | 1/2279 | 3/18866 | 0.3203981 | 0.5902856 | 0.5341114 | 1 | WDR47   |
| Biological Process | GO:0051684 | maintenance of Golgi location                                | 1/2279 | 3/18866 | 0.3203981 | 0.5902856 | 0.5341114 | 1 | UVRAG   |
| Biological Process | GO:0051728 | cell cycle switching, mitotic to meiotic cell cycle          | 1/2279 | 3/18866 | 0.3203981 | 0.5902856 | 0.5341114 | 1 | OVOL1   |
| Biological Process | GO:0051729 | germline cell cycle switching, mitotic to meiotic cell cycle | 1/2279 | 3/18866 | 0.3203981 | 0.5902856 | 0.5341114 | 1 | OVOL1   |



|                    |            |                                                                          |        |         |           |           |           |   |         |
|--------------------|------------|--------------------------------------------------------------------------|--------|---------|-----------|-----------|-----------|---|---------|
| Biological Process | GO:0051941 | regulation of amino acid uptake involved in synaptic transmission        | 1/2279 | 3/18866 | 0.3203981 | 0.5902856 | 0.5341114 | 1 | PER2    |
| Biological Process | GO:0051946 | regulation of glutamate uptake involved in transmission of nerve impulse | 1/2279 | 3/18866 | 0.3203981 | 0.5902856 | 0.5341114 | 1 | PER2    |
| Biological Process | GO:0055011 | atrial cardiac muscle cell differentiation                               | 1/2279 | 3/18866 | 0.3203981 | 0.5902856 | 0.5341114 | 1 | FHL2    |
| Biological Process | GO:0055014 | atrial cardiac muscle cell development                                   | 1/2279 | 3/18866 | 0.3203981 | 0.5902856 | 0.5341114 | 1 | FHL2    |
| Biological Process | GO:0055073 | cadmium ion homeostasis                                                  | 1/2279 | 3/18866 | 0.3203981 | 0.5902856 | 0.5341114 | 1 | SLC11A1 |
| Biological Process | GO:0060025 | regulation of synaptic activity                                          | 1/2279 | 3/18866 | 0.3203981 | 0.5902856 | 0.5341114 | 1 | MEF2C   |
| Biological Process | GO:0060168 | positive regulation of adenosine receptor signaling pathway              | 1/2279 | 3/18866 | 0.3203981 | 0.5902856 | 0.5341114 | 1 | ACP3    |
| Biological Process | GO:0060184 | cell cycle switching                                                     | 1/2279 | 3/18866 | 0.3203981 | 0.5902856 | 0.5341114 | 1 | OVOL1   |
| Biological Process | GO:0060197 | cloacal septation                                                        | 1/2279 | 3/18866 | 0.3203981 | 0.5902856 | 0.5341114 | 1 | WNT11   |

|                    |            |                                                                                     |        |         |           |           |           |   |  |        |
|--------------------|------------|-------------------------------------------------------------------------------------|--------|---------|-----------|-----------|-----------|---|--|--------|
| Biological Process | GO:0060278 | regulation of ovulation                                                             | 1/2279 | 3/18866 | 0.3203981 | 0.5902856 | 0.5341114 | 1 |  | INHBA  |
| Biological Process | GO:0060448 | dichotomous subdivision of terminal units involved in lung branching                | 1/2279 | 3/18866 | 0.3203981 | 0.5902856 | 0.5341114 | 1 |  | CTSH   |
| Biological Process | GO:0060474 | positive regulation of flagellated sperm motility involved in capacitation          | 1/2279 | 3/18866 | 0.3203981 | 0.5902856 | 0.5341114 | 1 |  | DEFB1  |
| Biological Process | GO:0060557 | positive regulation of vitamin D biosynthetic process                               | 1/2279 | 3/18866 | 0.3203981 | 0.5902856 | 0.5341114 | 1 |  | TNF    |
| Biological Process | GO:0060559 | positive regulation of calcidiol 1-monooxygenase activity                           | 1/2279 | 3/18866 | 0.3203981 | 0.5902856 | 0.5341114 | 1 |  | TNF    |
| Biological Process | GO:0060715 | syncytiotrophoblast cell differentiation involved in labyrinthine layer development | 1/2279 | 3/18866 | 0.3203981 | 0.5902856 | 0.5341114 | 1 |  | DNAJB6 |
| Biological Process | GO:0060741 | prostate gland stromal morphogenesis                                                | 1/2279 | 3/18866 | 0.3203981 | 0.5902856 | 0.5341114 | 1 |  | CRIP1  |
| Biological Process | GO:0060948 | cardiac vascular smooth muscle cell development                                     | 1/2279 | 3/18866 | 0.3203981 | 0.5902856 | 0.5341114 | 1 |  | NOTCH1 |
| Biological Process | GO:0060978 | angiogenesis involved in coronary vascular morphogenesis                            | 1/2279 | 3/18866 | 0.3203981 | 0.5902856 | 0.5341114 | 1 |  | PDGFRB |

|                    |            |                                                                        |        |         |           |           |           |   |        |
|--------------------|------------|------------------------------------------------------------------------|--------|---------|-----------|-----------|-----------|---|--------|
| Biological Process | GO:0061110 | dense core granule biogenesis                                          | 1/2279 | 3/18866 | 0.3203981 | 0.5902856 | 0.5341114 | 1 | PRKCA  |
| Biological Process | GO:0061198 | fungiform papilla formation                                            | 1/2279 | 3/18866 | 0.3203981 | 0.5902856 | 0.5341114 | 1 | HDAC1  |
| Biological Process | GO:0061364 | apoptotic process involved in luteolysis                               | 1/2279 | 3/18866 | 0.3203981 | 0.5902856 | 0.5341114 | 1 | SLIT3  |
| Biological Process | GO:0061713 | anterior neural tube closure                                           | 1/2279 | 3/18866 | 0.3203981 | 0.5902856 | 0.5341114 | 1 | GRHL2  |
| Biological Process | GO:0061739 | protein lipidation involved in autophagosome assembly                  | 1/2279 | 3/18866 | 0.3203981 | 0.5902856 | 0.5341114 | 1 | WIPI2  |
| Biological Process | GO:0061740 | protein targeting to lysosome involved in chaperone-mediated autophagy | 1/2279 | 3/18866 | 0.3203981 | 0.5902856 | 0.5341114 | 1 | CLU    |
| Biological Process | GO:0061819 | telomeric DNA-containing double minutes formation                      | 1/2279 | 3/18866 | 0.3203981 | 0.5902856 | 0.5341114 | 1 | ERCC1  |
| Biological Process | GO:0061909 | autophagosome-lysosome fusion                                          | 1/2279 | 3/18866 | 0.3203981 | 0.5902856 | 0.5341114 | 1 | RUBCNL |
| Biological Process | GO:0070236 | negative regulation of activation-induced cell death of T cells        | 1/2279 | 3/18866 | 0.3203981 | 0.5902856 | 0.5341114 | 1 | FADD   |

|                    |            |                                                                                                 |        |         |           |           |           |   |         |
|--------------------|------------|-------------------------------------------------------------------------------------------------|--------|---------|-----------|-----------|-----------|---|---------|
| Biological Process | GO:0070295 | renal water absorption                                                                          | 1/2279 | 3/18866 | 0.3203981 | 0.5902856 | 0.5341114 | 1 | AQP3    |
| Biological Process | GO:0070343 | white fat cell proliferation                                                                    | 1/2279 | 3/18866 | 0.3203981 | 0.5902856 | 0.5341114 | 1 | FTO     |
| Biological Process | GO:0070350 | regulation of white fat cell proliferation                                                      | 1/2279 | 3/18866 | 0.3203981 | 0.5902856 | 0.5341114 | 1 | FTO     |
| Biological Process | GO:0070425 | negative regulation of nucleotide-binding oligomerization domain containing signaling pathway   | 1/2279 | 3/18866 | 0.3203981 | 0.5902856 | 0.5341114 | 1 | TNFAIP3 |
| Biological Process | GO:0070428 | regulation of nucleotide-binding oligomerization domain containing 1 signaling pathway          | 1/2279 | 3/18866 | 0.3203981 | 0.5902856 | 0.5341114 | 1 | TNFAIP3 |
| Biological Process | GO:0070433 | negative regulation of nucleotide-binding oligomerization domain containing 2 signaling pathway | 1/2279 | 3/18866 | 0.3203981 | 0.5902856 | 0.5341114 | 1 | TNFAIP3 |
| Biological Process | GO:0070541 | response to platinum ion                                                                        | 1/2279 | 3/18866 | 0.3203981 | 0.5902856 | 0.5341114 | 1 | FECH    |
| Biological Process | GO:0070667 | negative regulation of mast cell proliferation                                                  | 1/2279 | 3/18866 | 0.3203981 | 0.5902856 | 0.5341114 | 1 | BLK     |
| Biological Process | GO:0070681 | glutaminyl-tRNAGln biosynthesis via transamidation                                              | 1/2279 | 3/18866 | 0.3203981 | 0.5902856 | 0.5341114 | 1 | GATB    |

|                    |            |                                                                                        |        |         |           |           |           |   |         |
|--------------------|------------|----------------------------------------------------------------------------------------|--------|---------|-----------|-----------|-----------|---|---------|
| Biological Process | GO:0071288 | cellular response to mercury ion                                                       | 1/2279 | 3/18866 | 0.3203981 | 0.5902856 | 0.5341114 | 1 | AQP1    |
| Biological Process | GO:0071314 | cellular response to cocaine                                                           | 1/2279 | 3/18866 | 0.3203981 | 0.5902856 | 0.5341114 | 1 | CRHBP   |
| Biological Process | GO:0071461 | cellular response to redox state                                                       | 1/2279 | 3/18866 | 0.3203981 | 0.5902856 | 0.5341114 | 1 | ARHGDI3 |
| Biological Process | GO:0071554 | cell wall organization or biogenesis                                                   | 1/2279 | 3/18866 | 0.3203981 | 0.5902856 | 0.5341114 | 1 | LYG2    |
| Biological Process | GO:0071630 | nuclear protein quality control by the ubiquitin-proteasome system                     | 1/2279 | 3/18866 | 0.3203981 | 0.5902856 | 0.5341114 | 1 | CUL3    |
| Biological Process | GO:0071641 | negative regulation of macrophage inflammatory protein 1 alpha production              | 1/2279 | 3/18866 | 0.3203981 | 0.5902856 | 0.5341114 | 1 | MEFV    |
| Biological Process | GO:0071873 | response to norepinephrine                                                             | 1/2279 | 3/18866 | 0.3203981 | 0.5902856 | 0.5341114 | 1 | APP     |
| Biological Process | GO:0071931 | positive regulation of transcription involved in G1/S transition of mitotic cell cycle | 1/2279 | 3/18866 | 0.3203981 | 0.5902856 | 0.5341114 | 1 | ESRRB   |
| Biological Process | GO:0072003 | kidney rudiment formation                                                              | 1/2279 | 3/18866 | 0.3203981 | 0.5902856 | 0.5341114 | 1 | PAX2    |

|                    |            |                                                                                         |        |         |           |           |           |   |        |
|--------------------|------------|-----------------------------------------------------------------------------------------|--------|---------|-----------|-----------|-----------|---|--------|
| Biological Process | GO:0072069 | DCT cell differentiation                                                                | 1/2279 | 3/18866 | 0.3203981 | 0.5902856 | 0.5341114 | 1 | PAX2   |
| Biological Process | GO:0072240 | metanephric DCT cell differentiation                                                    | 1/2279 | 3/18866 | 0.3203981 | 0.5902856 | 0.5341114 | 1 | PAX2   |
| Biological Process | GO:0072262 | metanephric glomerular mesangial cell proliferation involved in metanephros development | 1/2279 | 3/18866 | 0.3203981 | 0.5902856 | 0.5341114 | 1 | PDGFRB |
| Biological Process | GO:0072275 | metanephric glomerulus morphogenesis                                                    | 1/2279 | 3/18866 | 0.3203981 | 0.5902856 | 0.5341114 | 1 | PDGFRB |
| Biological Process | GO:0072276 | metanephric glomerulus vasculature morphogenesis                                        | 1/2279 | 3/18866 | 0.3203981 | 0.5902856 | 0.5341114 | 1 | PDGFRB |
| Biological Process | GO:0072277 | metanephric glomerular capillary formation                                              | 1/2279 | 3/18866 | 0.3203981 | 0.5902856 | 0.5341114 | 1 | PDGFRB |
| Biological Process | GO:0072338 | cellular lactam metabolic process                                                       | 1/2279 | 3/18866 | 0.3203981 | 0.5902856 | 0.5341114 | 1 | ABCC2  |
| Biological Process | GO:0072535 | tumor necrosis factor (ligand) superfamily member 11 production                         | 1/2279 | 3/18866 | 0.3203981 | 0.5902856 | 0.5341114 | 1 | LTF    |
| Biological Process | GO:0072709 | cellular response to sorbitol                                                           | 1/2279 | 3/18866 | 0.3203981 | 0.5902856 | 0.5341114 | 1 | MAP2K6 |

|                    |            |                                                                     |        |         |           |           |           |   |        |
|--------------------|------------|---------------------------------------------------------------------|--------|---------|-----------|-----------|-----------|---|--------|
| Biological Process | GO:0090031 | positive regulation of steroid hormone biosynthetic process         | 1/2279 | 3/18866 | 0.3203981 | 0.5902856 | 0.5341114 | 1 | POR    |
| Biological Process | GO:0090065 | regulation of production of siRNA involved in RNA interference      | 1/2279 | 3/18866 | 0.3203981 | 0.5902856 | 0.5341114 | 1 | RMRP   |
| Biological Process | GO:0090264 | regulation of immune complex clearance by monocytes and macrophages | 1/2279 | 3/18866 | 0.3203981 | 0.5902856 | 0.5341114 | 1 | CCR2   |
| Biological Process | GO:0090292 | nuclear matrix anchoring at nuclear membrane                        | 1/2279 | 3/18866 | 0.3203981 | 0.5902856 | 0.5341114 | 1 | SYNE1  |
| Biological Process | GO:0090360 | platelet-derived growth factor production                           | 1/2279 | 3/18866 | 0.3203981 | 0.5902856 | 0.5341114 | 1 | NDRG2  |
| Biological Process | GO:0090361 | regulation of platelet-derived growth factor production             | 1/2279 | 3/18866 | 0.3203981 | 0.5902856 | 0.5341114 | 1 | NDRG2  |
| Biological Process | GO:0090427 | activation of meiosis                                               | 1/2279 | 3/18866 | 0.3203981 | 0.5902856 | 0.5341114 | 1 | PLCB1  |
| Biological Process | GO:0097010 | eukaryotic translation initiation factor 4F complex assembly        | 1/2279 | 3/18866 | 0.3203981 | 0.5902856 | 0.5341114 | 1 | EIF4G1 |
| Biological Process | GO:0097017 | renal protein absorption                                            | 1/2279 | 3/18866 | 0.3203981 | 0.5902856 | 0.5341114 | 1 | GSN    |

|                    |            |                                                                                         |        |         |           |           |           |   |         |
|--------------------|------------|-----------------------------------------------------------------------------------------|--------|---------|-----------|-----------|-----------|---|---------|
| Biological Process | GO:0097374 | sensory neuron axon guidance                                                            | 1/2279 | 3/18866 | 0.3203981 | 0.5902856 | 0.5341114 | 1 | NRP2    |
| Biological Process | GO:0098758 | response to interleukin-8                                                               | 1/2279 | 3/18866 | 0.3203981 | 0.5902856 | 0.5341114 | 1 | CXCR1   |
| Biological Process | GO:0098759 | cellular response to interleukin-8                                                      | 1/2279 | 3/18866 | 0.3203981 | 0.5902856 | 0.5341114 | 1 | CXCR1   |
| Biological Process | GO:0098912 | membrane depolarization during atrial cardiac muscle cell action potential              | 1/2279 | 3/18866 | 0.3203981 | 0.5902856 | 0.5341114 | 1 | CACNA1C |
| Biological Process | GO:0099074 | mitochondrion to lysosome transport                                                     | 1/2279 | 3/18866 | 0.3203981 | 0.5902856 | 0.5341114 | 1 | PRKN    |
| Biological Process | GO:0099075 | mitochondrion-derived vesicle mediated transport                                        | 1/2279 | 3/18866 | 0.3203981 | 0.5902856 | 0.5341114 | 1 | PRKN    |
| Biological Process | GO:0099552 | trans-synaptic signaling by lipid, modulating synaptic transmission                     | 1/2279 | 3/18866 | 0.3203981 | 0.5902856 | 0.5341114 | 1 | F2R     |
| Biological Process | GO:0099553 | trans-synaptic signaling by endocannabinoid, modulating synaptic transmission           | 1/2279 | 3/18866 | 0.3203981 | 0.5902856 | 0.5341114 | 1 | F2R     |
| Biological Process | GO:0099575 | regulation of protein catabolic process at presynapse, modulating synaptic transmission | 1/2279 | 3/18866 | 0.3203981 | 0.5902856 | 0.5341114 | 1 | PLEKHG5 |



|                    |            |                                                                                                         |        |         |           |           |           |   |         |
|--------------------|------------|---------------------------------------------------------------------------------------------------------|--------|---------|-----------|-----------|-----------|---|---------|
| Biological Process | GO:0099578 | regulation of translation at postsynapse, modulating synaptic transmission                              | 1/2279 | 3/18866 | 0.3203981 | 0.5902856 | 0.5341114 | 1 | CYFIP1  |
| Biological Process | GO:0101010 | pulmonary blood vessel remodeling                                                                       | 1/2279 | 3/18866 | 0.3203981 | 0.5902856 | 0.5341114 | 1 | MIR143  |
| Biological Process | GO:0106135 | negative regulation of cardiac muscle cell contraction                                                  | 1/2279 | 3/18866 | 0.3203981 | 0.5902856 | 0.5341114 | 1 | BIN1    |
| Biological Process | GO:0110030 | regulation of G2/M1 transition of meiotic cell cycle                                                    | 1/2279 | 3/18866 | 0.3203981 | 0.5902856 | 0.5341114 | 1 | CDC25A  |
| Biological Process | GO:0110032 | positive regulation of G2/M1 transition of meiotic cell cycle                                           | 1/2279 | 3/18866 | 0.3203981 | 0.5902856 | 0.5341114 | 1 | CDC25A  |
| Biological Process | GO:0140157 | ammonium import across plasma membrane                                                                  | 1/2279 | 3/18866 | 0.3203981 | 0.5902856 | 0.5341114 | 1 | SLC12A7 |
| Biological Process | GO:0140200 | adenylate cyclase-activating adrenergic receptor signaling pathway involved in regulation of heart rate | 1/2279 | 3/18866 | 0.3203981 | 0.5902856 | 0.5341114 | 1 | PDE4D   |
| Biological Process | GO:0140245 | regulation of translation at postsynapse                                                                | 1/2279 | 3/18866 | 0.3203981 | 0.5902856 | 0.5341114 | 1 | CYFIP1  |
| Biological Process | GO:0150007 | clathrin-dependent synaptic vesicle endocytosis                                                         | 1/2279 | 3/18866 | 0.3203981 | 0.5902856 | 0.5341114 | 1 | ITSN1   |

|                    |            |                                                                         |        |         |           |           |           |   |        |
|--------------------|------------|-------------------------------------------------------------------------|--------|---------|-----------|-----------|-----------|---|--------|
| Biological Process | GO:0150066 | negative regulation of deacetylase activity                             | 1/2279 | 3/18866 | 0.3203981 | 0.5902856 | 0.5341114 | 1 | SPHK2  |
| Biological Process | GO:1900063 | regulation of peroxisome organization                                   | 1/2279 | 3/18866 | 0.3203981 | 0.5902856 | 0.5341114 | 1 | DNM1L  |
| Biological Process | GO:1900104 | regulation of hyaluronon cable assembly                                 | 1/2279 | 3/18866 | 0.3203981 | 0.5902856 | 0.5341114 | 1 | HAS3   |
| Biological Process | GO:1900106 | positive regulation of hyaluronon cable assembly                        | 1/2279 | 3/18866 | 0.3203981 | 0.5902856 | 0.5341114 | 1 | HAS3   |
| Biological Process | GO:1900130 | regulation of lipid binding                                             | 1/2279 | 3/18866 | 0.3203981 | 0.5902856 | 0.5341114 | 1 | MIR27A |
| Biological Process | GO:1900131 | negative regulation of lipid binding                                    | 1/2279 | 3/18866 | 0.3203981 | 0.5902856 | 0.5341114 | 1 | MIR27A |
| Biological Process | GO:1900166 | regulation of glial cell-derived neurotrophic factor secretion          | 1/2279 | 3/18866 | 0.3203981 | 0.5902856 | 0.5341114 | 1 | SORL1  |
| Biological Process | GO:1900168 | positive regulation of glial cell-derived neurotrophic factor secretion | 1/2279 | 3/18866 | 0.3203981 | 0.5902856 | 0.5341114 | 1 | SORL1  |
| Biological Process | GO:1900194 | negative regulation of oocyte maturation                                | 1/2279 | 3/18866 | 0.3203981 | 0.5902856 | 0.5341114 | 1 | NPPC   |

|                    |            |                                                                                               |        |         |           |           |           |   |         |
|--------------------|------------|-----------------------------------------------------------------------------------------------|--------|---------|-----------|-----------|-----------|---|---------|
| Biological Process | GO:1900200 | mesenchymal cell apoptotic process involved in metanephros development                        | 1/2279 | 3/18866 | 0.3203981 | 0.5902856 | 0.5341114 | 1 | PAX2    |
| Biological Process | GO:1900211 | regulation of mesenchymal cell apoptotic process involved in metanephros development          | 1/2279 | 3/18866 | 0.3203981 | 0.5902856 | 0.5341114 | 1 | PAX2    |
| Biological Process | GO:1900212 | negative regulation of mesenchymal cell apoptotic process involved in metanephros development | 1/2279 | 3/18866 | 0.3203981 | 0.5902856 | 0.5341114 | 1 | PAX2    |
| Biological Process | GO:1900369 | negative regulation of RNA interference                                                       | 1/2279 | 3/18866 | 0.3203981 | 0.5902856 | 0.5341114 | 1 | RMRP    |
| Biological Process | GO:1900620 | acetate ester biosynthetic process                                                            | 1/2279 | 3/18866 | 0.3203981 | 0.5902856 | 0.5341114 | 1 | SLC44A4 |
| Biological Process | GO:1901329 | regulation of odontoblast differentiation                                                     | 1/2279 | 3/18866 | 0.3203981 | 0.5902856 | 0.5341114 | 1 | CEBPB   |
| Biological Process | GO:1901355 | response to rapamycin                                                                         | 1/2279 | 3/18866 | 0.3203981 | 0.5902856 | 0.5341114 | 1 | LARP1   |
| Biological Process | GO:1901376 | organic heteropentacyclic compound metabolic process                                          | 1/2279 | 3/18866 | 0.3203981 | 0.5902856 | 0.5341114 | 1 | NFE2L2  |
| Biological Process | GO:1901401 | regulation of tetrapyrrole metabolic process                                                  | 1/2279 | 3/18866 | 0.3203981 | 0.5902856 | 0.5341114 | 1 | TMEM14C |

|                    |            |                                                                                  |        |         |           |           |           |   |           |
|--------------------|------------|----------------------------------------------------------------------------------|--------|---------|-----------|-----------|-----------|---|-----------|
| Biological Process | GO:1901407 | regulation of phosphorylation of RNA polymerase II C-terminal domain             | 1/2279 | 3/18866 | 0.3203981 | 0.5902856 | 0.5341114 | 1 | BRD4      |
| Biological Process | GO:1901491 | negative regulation of lymphangiogenesis                                         | 1/2279 | 3/18866 | 0.3203981 | 0.5902856 | 0.5341114 | 1 | VASH1     |
| Biological Process | GO:1901645 | regulation of synoviocyte proliferation                                          | 1/2279 | 3/18866 | 0.3203981 | 0.5902856 | 0.5341114 | 1 | TNF       |
| Biological Process | GO:1901664 | regulation of NAD+ ADP-ribosyltransferase activity                               | 1/2279 | 3/18866 | 0.3203981 | 0.5902856 | 0.5341114 | 1 | TGFB1     |
| Biological Process | GO:1901666 | positive regulation of NAD+ ADP-ribosyltransferase activity                      | 1/2279 | 3/18866 | 0.3203981 | 0.5902856 | 0.5341114 | 1 | TGFB1     |
| Biological Process | GO:1901726 | negative regulation of histone deacetylase activity                              | 1/2279 | 3/18866 | 0.3203981 | 0.5902856 | 0.5341114 | 1 | SPHK2     |
| Biological Process | GO:1901837 | negative regulation of transcription of nucleolar large rRNA by RNA polymerase I | 1/2279 | 3/18866 | 0.3203981 | 0.5902856 | 0.5341114 | 1 | MACROH2A2 |
| Biological Process | GO:1901874 | negative regulation of post-translational protein modification                   | 1/2279 | 3/18866 | 0.3203981 | 0.5902856 | 0.5341114 | 1 | P3H1      |
| Biological Process | GO:1901994 | negative regulation of meiotic cell cycle phase transition                       | 1/2279 | 3/18866 | 0.3203981 | 0.5902856 | 0.5341114 | 1 | OVOL1     |

|                    |            |                                                                                                                                        |        |         |           |           |           |   |          |
|--------------------|------------|----------------------------------------------------------------------------------------------------------------------------------------|--------|---------|-----------|-----------|-----------|---|----------|
| Biological Process | GO:1902037 | negative regulation of hematopoietic stem cell differentiation                                                                         | 1/2279 | 3/18866 | 0.3203981 | 0.5902856 | 0.5341114 | 1 | NFE2L2   |
| Biological Process | GO:1902162 | regulation of DNA damage response, signal transduction by p53 class mediator resulting in transcription of p21 class mediator          | 1/2279 | 3/18866 | 0.3203981 | 0.5902856 | 0.5341114 | 1 | ZNF385A  |
| Biological Process | GO:1902164 | positive regulation of DNA damage response, signal transduction by p53 class mediator resulting in transcription of p21 class mediator | 1/2279 | 3/18866 | 0.3203981 | 0.5902856 | 0.5341114 | 1 | ZNF385A  |
| Biological Process | GO:1902174 | positive regulation of keratinocyte apoptotic process                                                                                  | 1/2279 | 3/18866 | 0.3203981 | 0.5902856 | 0.5341114 | 1 | GSN      |
| Biological Process | GO:1902263 | apoptotic process involved in embryonic digit morphogenesis                                                                            | 1/2279 | 3/18866 | 0.3203981 | 0.5902856 | 0.5341114 | 1 | NOTCH1   |
| Biological Process | GO:1902309 | negative regulation of peptidyl-serine dephosphorylation                                                                               | 1/2279 | 3/18866 | 0.3203981 | 0.5902856 | 0.5341114 | 1 | PPP1R16B |
| Biological Process | GO:1902499 | positive regulation of protein autoubiquitination                                                                                      | 1/2279 | 3/18866 | 0.3203981 | 0.5902856 | 0.5341114 | 1 | MTA1     |
| Biological Process | GO:1902603 | carnitine transmembrane transport                                                                                                      | 1/2279 | 3/18866 | 0.3203981 | 0.5902856 | 0.5341114 | 1 | SLC22A5  |
| Biological Process | GO:1902659 | regulation of glucose mediated signaling pathway                                                                                       | 1/2279 | 3/18866 | 0.3203981 | 0.5902856 | 0.5341114 | 1 | PIH1D1   |

|                    |            |                                                                                    |        |         |           |           |           |   |        |
|--------------------|------------|------------------------------------------------------------------------------------|--------|---------|-----------|-----------|-----------|---|--------|
| Biological Process | GO:1902661 | positive regulation of glucose mediated signaling pathway                          | 1/2279 | 3/18866 | 0.3203981 | 0.5902856 | 0.5341114 | 1 | PIH1D1 |
| Biological Process | GO:1902856 | negative regulation of non-motile cilium assembly                                  | 1/2279 | 3/18866 | 0.3203981 | 0.5902856 | 0.5341114 | 1 | DNM2   |
| Biological Process | GO:1902896 | terminal web assembly                                                              | 1/2279 | 3/18866 | 0.3203981 | 0.5902856 | 0.5341114 | 1 | EZR    |
| Biological Process | GO:1902897 | regulation of postsynaptic density protein 95 clustering                           | 1/2279 | 3/18866 | 0.3203981 | 0.5902856 | 0.5341114 | 1 | ZMYND8 |
| Biological Process | GO:1902990 | mitotic telomere maintenance via semi-conservative replication                     | 1/2279 | 3/18866 | 0.3203981 | 0.5902856 | 0.5341114 | 1 | RTKL1  |
| Biological Process | GO:1903070 | negative regulation of ER-associated ubiquitin-dependent protein catabolic process | 1/2279 | 3/18866 | 0.3203981 | 0.5902856 | 0.5341114 | 1 | SVIP   |
| Biological Process | GO:1903225 | negative regulation of endodermal cell differentiation                             | 1/2279 | 3/18866 | 0.3203981 | 0.5902856 | 0.5341114 | 1 | COL5A1 |
| Biological Process | GO:1903375 | facioacoustic ganglion development                                                 | 1/2279 | 3/18866 | 0.3203981 | 0.5902856 | 0.5341114 | 1 | NRP2   |
| Biological Process | GO:1903422 | negative regulation of synaptic vesicle recycling                                  | 1/2279 | 3/18866 | 0.3203981 | 0.5902856 | 0.5341114 | 1 | CYFIP1 |

|                    |            |                                                                    |        |         |           |           |           |   |        |
|--------------------|------------|--------------------------------------------------------------------|--------|---------|-----------|-----------|-----------|---|--------|
| Biological Process | GO:1903445 | protein transport from ciliary membrane to plasma membrane         | 1/2279 | 3/18866 | 0.3203981 | 0.5902856 | 0.5341114 | 1 | RILPL1 |
| Biological Process | GO:1903542 | negative regulation of exosomal secretion                          | 1/2279 | 3/18866 | 0.3203981 | 0.5902856 | 0.5341114 | 1 | PRKN   |
| Biological Process | GO:1903650 | negative regulation of cytoplasmic transport                       | 1/2279 | 3/18866 | 0.3203981 | 0.5902856 | 0.5341114 | 1 | SNX3   |
| Biological Process | GO:1903691 | positive regulation of wound healing, spreading of epidermal cells | 1/2279 | 3/18866 | 0.3203981 | 0.5902856 | 0.5341114 | 1 | RREB1  |
| Biological Process | GO:1903742 | regulation of anterograde synaptic vesicle transport               | 1/2279 | 3/18866 | 0.3203981 | 0.5902856 | 0.5341114 | 1 | CNIH2  |
| Biological Process | GO:1903964 | monounsaturated fatty acid metabolic process                       | 1/2279 | 3/18866 | 0.3203981 | 0.5902856 | 0.5341114 | 1 | SCD    |
| Biological Process | GO:1904000 | positive regulation of eating behavior                             | 1/2279 | 3/18866 | 0.3203981 | 0.5902856 | 0.5341114 | 1 | GHRL   |
| Biological Process | GO:1904048 | regulation of spontaneous neurotransmitter secretion               | 1/2279 | 3/18866 | 0.3203981 | 0.5902856 | 0.5341114 | 1 | PRKN   |
| Biological Process | GO:1904059 | regulation of locomotor rhythm                                     | 1/2279 | 3/18866 | 0.3203981 | 0.5902856 | 0.5341114 | 1 | ZFH3   |

|                    |            |                                                                  |        |         |           |           |           |   |         |
|--------------------|------------|------------------------------------------------------------------|--------|---------|-----------|-----------|-----------|---|---------|
| Biological Process | GO:1904098 | regulation of protein O-linked glycosylation                     | 1/2279 | 3/18866 | 0.3203981 | 0.5902856 | 0.5341114 | 1 | POMT2   |
| Biological Process | GO:1904100 | positive regulation of protein O-linked glycosylation            | 1/2279 | 3/18866 | 0.3203981 | 0.5902856 | 0.5341114 | 1 | POMT2   |
| Biological Process | GO:1904158 | axonemal central apparatus assembly                              | 1/2279 | 3/18866 | 0.3203981 | 0.5902856 | 0.5341114 | 1 | DNAJB13 |
| Biological Process | GO:1904273 | L-alanine import across plasma membrane                          | 1/2279 | 3/18866 | 0.3203981 | 0.5902856 | 0.5341114 | 1 | SLC7A8  |
| Biological Process | GO:1904347 | regulation of small intestine smooth muscle contraction          | 1/2279 | 3/18866 | 0.3203981 | 0.5902856 | 0.5341114 | 1 | GHRL    |
| Biological Process | GO:1904349 | positive regulation of small intestine smooth muscle contraction | 1/2279 | 3/18866 | 0.3203981 | 0.5902856 | 0.5341114 | 1 | GHRL    |
| Biological Process | GO:1904381 | Golgi apparatus mannose trimming                                 | 1/2279 | 3/18866 | 0.3203981 | 0.5902856 | 0.5341114 | 1 | MAN1C1  |
| Biological Process | GO:1904430 | negative regulation of t-circle formation                        | 1/2279 | 3/18866 | 0.3203981 | 0.5902856 | 0.5341114 | 1 | RTEL1   |
| Biological Process | GO:1904533 | regulation of telomeric loop disassembly                         | 1/2279 | 3/18866 | 0.3203981 | 0.5902856 | 0.5341114 | 1 | RTEL1   |



|                    |            |                                                                                                   |        |         |           |           |           |   |        |
|--------------------|------------|---------------------------------------------------------------------------------------------------|--------|---------|-----------|-----------|-----------|---|--------|
| Biological Process | GO:1904594 | regulation of termination of RNA polymerase II transcription                                      | 1/2279 | 3/18866 | 0.3203981 | 0.5902856 | 0.5341114 | 1 | SCAF8  |
| Biological Process | GO:1904761 | negative regulation of myofibroblast differentiation                                              | 1/2279 | 3/18866 | 0.3203981 | 0.5902856 | 0.5341114 | 1 | RB1    |
| Biological Process | GO:1904878 | negative regulation of calcium ion transmembrane transport via high voltage-gated calcium channel | 1/2279 | 3/18866 | 0.3203981 | 0.5902856 | 0.5341114 | 1 | BIN1   |
| Biological Process | GO:1904891 | positive regulation of excitatory synapse assembly                                                | 1/2279 | 3/18866 | 0.3203981 | 0.5902856 | 0.5341114 | 1 | SEMA4A |
| Biological Process | GO:1905044 | regulation of Schwann cell proliferation involved in axon regeneration                            | 1/2279 | 3/18866 | 0.3203981 | 0.5902856 | 0.5341114 | 1 | CERS2  |
| Biological Process | GO:1905109 | regulation of pulmonary blood vessel remodeling                                                   | 1/2279 | 3/18866 | 0.3203981 | 0.5902856 | 0.5341114 | 1 | MIR143 |
| Biological Process | GO:1905111 | positive regulation of pulmonary blood vessel remodeling                                          | 1/2279 | 3/18866 | 0.3203981 | 0.5902856 | 0.5341114 | 1 | MIR143 |
| Biological Process | GO:1905176 | positive regulation of vascular associated smooth muscle cell dedifferentiation                   | 1/2279 | 3/18866 | 0.3203981 | 0.5902856 | 0.5341114 | 1 | PDGFB  |
| Biological Process | GO:1905289 | regulation of CAMKK-AMPK signaling cascade                                                        | 1/2279 | 3/18866 | 0.3203981 | 0.5902856 | 0.5341114 | 1 | HTT    |

|                    |            |                                                                               |        |         |           |           |           |   |        |
|--------------------|------------|-------------------------------------------------------------------------------|--------|---------|-----------|-----------|-----------|---|--------|
| Biological Process | GO:1905335 | regulation of aggrephagy                                                      | 1/2279 | 3/18866 | 0.3203981 | 0.5902856 | 0.5341114 | 1 | HTT    |
| Biological Process | GO:1905337 | positive regulation of aggrephagy                                             | 1/2279 | 3/18866 | 0.3203981 | 0.5902856 | 0.5341114 | 1 | HTT    |
| Biological Process | GO:1905457 | negative regulation of lymphoid progenitor cell differentiation               | 1/2279 | 3/18866 | 0.3203981 | 0.5902856 | 0.5341114 | 1 | NOTCH1 |
| Biological Process | GO:1905463 | negative regulation of DNA duplex unwinding                                   | 1/2279 | 3/18866 | 0.3203981 | 0.5902856 | 0.5341114 | 1 | MCM2   |
| Biological Process | GO:1905653 | positive regulation of artery morphogenesis                                   | 1/2279 | 3/18866 | 0.3203981 | 0.5902856 | 0.5341114 | 1 | NOTCH1 |
| Biological Process | GO:1905684 | regulation of plasma membrane repair                                          | 1/2279 | 3/18866 | 0.3203981 | 0.5902856 | 0.5341114 | 1 | MYH9   |
| Biological Process | GO:1905764 | regulation of protection from non-homologous end joining at telomere          | 1/2279 | 3/18866 | 0.3203981 | 0.5902856 | 0.5341114 | 1 | ERCC1  |
| Biological Process | GO:1905765 | negative regulation of protection from non-homologous end joining at telomere | 1/2279 | 3/18866 | 0.3203981 | 0.5902856 | 0.5341114 | 1 | ERCC1  |
| Biological Process | GO:1905784 | regulation of anaphase-promoting complex-dependent catabolic process          | 1/2279 | 3/18866 | 0.3203981 | 0.5902856 | 0.5341114 | 1 | FZR1   |

|                    |            |                                                                                                                |        |         |           |           |           |   |        |
|--------------------|------------|----------------------------------------------------------------------------------------------------------------|--------|---------|-----------|-----------|-----------|---|--------|
| Biological Process | GO:1905786 | positive regulation of anaphase-promoting complex-dependent catabolic process                                  | 1/2279 | 3/18866 | 0.3203981 | 0.5902856 | 0.5341114 | 1 | FZR1   |
| Biological Process | GO:1905917 | positive regulation of cell differentiation involved in phenotypic switching                                   | 1/2279 | 3/18866 | 0.3203981 | 0.5902856 | 0.5341114 | 1 | MIR140 |
| Biological Process | GO:1905932 | positive regulation of vascular associated smooth muscle cell differentiation involved in phenotypic switching | 1/2279 | 3/18866 | 0.3203981 | 0.5902856 | 0.5341114 | 1 | MIR140 |
| Biological Process | GO:1990074 | polyuridylation-dependent mRNA catabolic process                                                               | 1/2279 | 3/18866 | 0.3203981 | 0.5902856 | 0.5341114 | 1 | DIS3L2 |
| Biological Process | GO:1990079 | cartilage homeostasis                                                                                          | 1/2279 | 3/18866 | 0.3203981 | 0.5902856 | 0.5341114 | 1 | MTF1   |
| Biological Process | GO:1990108 | protein linear deubiquitination                                                                                | 1/2279 | 3/18866 | 0.3203981 | 0.5902856 | 0.5341114 | 1 | CYLD   |
| Biological Process | GO:1990166 | protein localization to site of double-strand break                                                            | 1/2279 | 3/18866 | 0.3203981 | 0.5902856 | 0.5341114 | 1 | SLF1   |
| Biological Process | GO:1990428 | miRNA transport                                                                                                | 1/2279 | 3/18866 | 0.3203981 | 0.5902856 | 0.5341114 | 1 | TGFBR2 |
| Biological Process | GO:1990770 | small intestine smooth muscle contraction                                                                      | 1/2279 | 3/18866 | 0.3203981 | 0.5902856 | 0.5341114 | 1 | GHRL   |

|                    |            |                                                                               |        |         |           |           |           |   |          |
|--------------------|------------|-------------------------------------------------------------------------------|--------|---------|-----------|-----------|-----------|---|----------|
| Biological Process | GO:1990774 | tumor necrosis factor secretion                                               | 1/2279 | 3/18866 | 0.3203981 | 0.5902856 | 0.5341114 | 1 | SPHK2    |
| Biological Process | GO:2000078 | positive regulation of type B pancreatic cell development                     | 1/2279 | 3/18866 | 0.3203981 | 0.5902856 | 0.5341114 | 1 | RFX3     |
| Biological Process | GO:2000097 | regulation of smooth muscle cell-matrix adhesion                              | 1/2279 | 3/18866 | 0.3203981 | 0.5902856 | 0.5341114 | 1 | PLAU     |
| Biological Process | GO:2000111 | positive regulation of macrophage apoptotic process                           | 1/2279 | 3/18866 | 0.3203981 | 0.5902856 | 0.5341114 | 1 | MEF2C    |
| Biological Process | GO:2000120 | positive regulation of sodium-dependent phosphate transport                   | 1/2279 | 3/18866 | 0.3203981 | 0.5902856 | 0.5341114 | 1 | CEBPB    |
| Biological Process | GO:2000124 | regulation of endocannabinoid signaling pathway                               | 1/2279 | 3/18866 | 0.3203981 | 0.5902856 | 0.5341114 | 1 | MGLL     |
| Biological Process | GO:2000170 | positive regulation of peptidyl-cysteine S-nitrosylation                      | 1/2279 | 3/18866 | 0.3203981 | 0.5902856 | 0.5341114 | 1 | NOS1AP   |
| Biological Process | GO:2000297 | negative regulation of synapse maturation                                     | 1/2279 | 3/18866 | 0.3203981 | 0.5902856 | 0.5341114 | 1 | ARHGEF15 |
| Biological Process | GO:2000307 | regulation of tumor necrosis factor (ligand) superfamily member 11 production | 1/2279 | 3/18866 | 0.3203981 | 0.5902856 | 0.5341114 | 1 | LTF      |

|                    |            |                                                                                                                                    |        |         |           |           |           |   |         |
|--------------------|------------|------------------------------------------------------------------------------------------------------------------------------------|--------|---------|-----------|-----------|-----------|---|---------|
| Biological Process | GO:2000412 | positive regulation of thymocyte migration                                                                                         | 1/2279 | 3/18866 | 0.3203981 | 0.5902856 | 0.5341114 | 1 | CCR2    |
| Biological Process | GO:2000446 | regulation of macrophage migration inhibitory factor signaling pathway                                                             | 1/2279 | 3/18866 | 0.3203981 | 0.5902856 | 0.5341114 | 1 | ANGPT1  |
| Biological Process | GO:2000468 | regulation of peroxidase activity                                                                                                  | 1/2279 | 3/18866 | 0.3203981 | 0.5902856 | 0.5341114 | 1 | SIRT3   |
| Biological Process | GO:2000619 | negative regulation of histone H4-K16 acetylation                                                                                  | 1/2279 | 3/18866 | 0.3203981 | 0.5902856 | 0.5341114 | 1 | PIH1D1  |
| Biological Process | GO:2000705 | regulation of dense core granule biogenesis                                                                                        | 1/2279 | 3/18866 | 0.3203981 | 0.5902856 | 0.5341114 | 1 | PRKCA   |
| Biological Process | GO:2000804 | regulation of termination of RNA polymerase II transcription, poly(A)-coupled                                                      | 1/2279 | 3/18866 | 0.3203981 | 0.5902856 | 0.5341114 | 1 | SCAF8   |
| Biological Process | GO:2000974 | negative regulation of pro-B cell differentiation                                                                                  | 1/2279 | 3/18866 | 0.3203981 | 0.5902856 | 0.5341114 | 1 | NOTCH1  |
| Biological Process | GO:2001038 | regulation of cellular response to drug                                                                                            | 1/2279 | 3/18866 | 0.3203981 | 0.5902856 | 0.5341114 | 1 | NCOA1   |
| Biological Process | GO:2001190 | positive regulation of T cell activation via T cell receptor contact with antigen bound to MHC molecule on antigen presenting cell | 1/2279 | 3/18866 | 0.3203981 | 0.5902856 | 0.5341114 | 1 | HLA-DMB |

|                    |            |                                                                                           |         |           |           |           |           |    |                                                                                                                                                       |
|--------------------|------------|-------------------------------------------------------------------------------------------|---------|-----------|-----------|-----------|-----------|----|-------------------------------------------------------------------------------------------------------------------------------------------------------|
| Biological Process | GO:0002200 | somatic diversification of immune receptors                                               | 11/2279 | 77/18866  | 0.3242519 | 0.5970381 | 0.5402213 | 11 | IL10/UNG/TGFB1/PTPRC/TCF3/TP53BP1/CTNBL1/ERCC1/TNFSF13/PAXIP1/NSD2                                                                                    |
| Biological Process | GO:0032413 | negative regulation of ion transmembrane transporter activity                             | 11/2279 | 77/18866  | 0.3242519 | 0.5970381 | 0.5402213 | 11 | KCNE1/THADA/CASQ2/TLR9/CAB39/GSTO1/PRKCE/NEDD4/DYSF/HECW2/CBARP                                                                                       |
| Biological Process | GO:0070830 | bicellular tight junction assembly                                                        | 11/2279 | 77/18866  | 0.3242519 | 0.5970381 | 0.5402213 | 11 | TBCD/RUNX1/TNF/ACTN4/WNT11/PRKCH/GRHL2/PRKCI/MPP7/MYO1C/NPHP4                                                                                         |
| Biological Process | GO:0046620 | regulation of organ growth                                                                | 16/2279 | 116/18866 | 0.3249051 | 0.598125  | 0.5412048 | 16 | CTDP1/MIR199A1/VGLL4/TGFBR2/RIPK1/RBPJ/LATS2/FGFR1/POR/STK3/ACACB/MEIS1/MIR199A2/NOTCH1/MEF2C/HLX                                                     |
| Biological Process | GO:0008217 | regulation of blood pressure                                                              | 25/2279 | 187/18866 | 0.325127  | 0.5984176 | 0.5414695 | 25 | CTSZ/PDE4D/CTSG/SLC2A5/PPARG/LNPEP/SMAD3/MIR199A1/SGK1/GJA5/DLL1/NISCH/KCNK6/HBB/GNB3/AGTRAP/PDGFB/MIR199A2/P2RX1/F2R/AGTR1/CACNA1B/NPY/HSD11B2/AOPEP |
| Biological Process | GO:1903018 | regulation of glycoprotein metabolic process                                              | 8/2279  | 54/18866  | 0.325639  | 0.5992438 | 0.5422171 | 8  | MIR101-2/TCF7L2/AGO2/POMT2/ITM2C/PLCB1/BCL2/PXYLP1                                                                                                    |
| Biological Process | GO:0022612 | gland morphogenesis                                                                       | 17/2279 | 124/18866 | 0.3268498 | 0.6013555 | 0.5441278 | 17 | RXRA/RPS6KA1/LRP5L/VDR/TNF/TNFAIP3/CSF1R/TGFBR2/CUL3/FGFR1/TGFB1/RARG/BCL2/NOTCH1/CPB2/CEBPB/CRIP1                                                    |
| Biological Process | GO:0034502 | protein localization to chromosome                                                        | 12/2279 | 85/18866  | 0.3280015 | 0.6019997 | 0.5447107 | 12 | SPIDR/TNKS/BRCA2/SETD2/CHAMP1/MIS12/RB1/PIH1D1/CDCA5/CCT6A/MACROH2A2/SLF1                                                                             |
| Biological Process | GO:0043154 | negative regulation of cysteine-type endopeptidase activity involved in apoptotic process | 12/2279 | 85/18866  | 0.3280015 | 0.6019997 | 0.5447107 | 12 | RPS6KA1/ARRB1/TNF/MICAL1/THBS1/PAX2/AQP1/POR/DNAJB6/NOL3/ARRB2/PIH1D1                                                                                 |

|                    |            |                                                                                            |         |           |           |           |           |    |                                                                                                                                                                                                                                                                     |
|--------------------|------------|--------------------------------------------------------------------------------------------|---------|-----------|-----------|-----------|-----------|----|---------------------------------------------------------------------------------------------------------------------------------------------------------------------------------------------------------------------------------------------------------------------|
| Biological Process | GO:0043297 | apical junction assembly                                                                   | 12/2279 | 85/18866  | 0.3280015 | 0.6019997 | 0.5447107 | 12 | TBCD/RUNX1/TNF/ACTN4/WNT11/PRKCH/GRHL2/WDR1/PRKCI/MPP7/MYO1C/NPHP4                                                                                                                                                                                                  |
| Biological Process | GO:0071214 | cellular response to abiotic stimulus                                                      | 43/2279 | 331/18866 | 0.3282155 | 0.6019997 | 0.5447107 | 43 | HDAC4/BLM/PDE6A/SPIDR/MFAP4/CRB1/PIK3R1/MYLK/BMF/DNM2/GPLD1/HUS1/TNFRSF1A/LRRC8C/WNT11/CDC25A/AQP1/GNA11/CAB39/BCL10/PALM/CREBBP/MAP3K14/ENG/INSRRR/TP53BP1/GRK7/RHNO1/CHEK2/ARHGEF2/CASP1/NEDD4/SLC2A1/DYSF/ERCC1/CRIP1/BCL2L1/ANKRD1/POLD3/XPA/FADD/EEF1D/MAP3K20 |
| Biological Process | GO:0104004 | cellular response to environmental stimulus                                                | 43/2279 | 331/18866 | 0.3282155 | 0.6019997 | 0.5447107 | 43 | HDAC4/BLM/PDE6A/SPIDR/MFAP4/CRB1/PIK3R1/MYLK/BMF/DNM2/GPLD1/HUS1/TNFRSF1A/LRRC8C/WNT11/CDC25A/AQP1/GNA11/CAB39/BCL10/PALM/CREBBP/MAP3K14/ENG/INSRRR/TP53BP1/GRK7/RHNO1/CHEK2/ARHGEF2/CASP1/NEDD4/SLC2A1/DYSF/ERCC1/CRIP1/BCL2L1/ANKRD1/POLD3/XPA/FADD/EEF1D/MAP3K20 |
| Biological Process | GO:0003181 | atrioventricular valve morphogenesis                                                       | 4/2279  | 24/18866  | 0.3283404 | 0.6019997 | 0.5447107 | 4  | ZFPM1/TGFBR2/NOTCH1/SLIT3                                                                                                                                                                                                                                           |
| Biological Process | GO:0003272 | endocardial cushion formation                                                              | 4/2279  | 24/18866  | 0.3283404 | 0.6019997 | 0.5447107 | 4  | TGFBR2/RBPJ/ENG/NOTCH1                                                                                                                                                                                                                                              |
| Biological Process | GO:0032925 | regulation of activin receptor signaling pathway                                           | 4/2279  | 24/18866  | 0.3283404 | 0.6019997 | 0.5447107 | 4  | SKI/SMAD7/ZC3H3/NODAL                                                                                                                                                                                                                                               |
| Biological Process | GO:0036003 | positive regulation of transcription from RNA polymerase II promoter in response to stress | 4/2279  | 24/18866  | 0.3283404 | 0.6019997 | 0.5447107 | 4  | RBPJ/NFE2L2/NOTCH1/CEBPB                                                                                                                                                                                                                                            |
| Biological Process | GO:0044550 | secondary metabolite biosynthetic process                                                  | 4/2279  | 24/18866  | 0.3283404 | 0.6019997 | 0.5447107 | 4  | ZEB2/CDH3/RAPGEF2/MYO5A                                                                                                                                                                                                                                             |
| Biological Process | GO:0045954 | positive regulation of natural killer cell mediated cytotoxicity                           | 4/2279  | 24/18866  | 0.3283404 | 0.6019997 | 0.5447107 | 4  | CD226/HLA-F/IL18RAP/CADM1                                                                                                                                                                                                                                           |

|                    |            |                                                                          |         |           |           |           |           |    |                                                                                                           |
|--------------------|------------|--------------------------------------------------------------------------|---------|-----------|-----------|-----------|-----------|----|-----------------------------------------------------------------------------------------------------------|
| Biological Process | GO:0046628 | positive regulation of insulin receptor signaling pathway                | 4/2279  | 24/18866  | 0.3283404 | 0.6019997 | 0.5447107 | 4  | PRKCZ/SORL1/GNAI2/ZBTB7B                                                                                  |
| Biological Process | GO:0051905 | establishment of pigment granule localization                            | 4/2279  | 24/18866  | 0.3283404 | 0.6019997 | 0.5447107 | 4  | RAB27A/CDH3/DCTN2/MYO5A                                                                                   |
| Biological Process | GO:0086064 | cell communication by electrical coupling involved in cardiac conduction | 4/2279  | 24/18866  | 0.3283404 | 0.6019997 | 0.5447107 | 4  | PDE4D/CACNA1C/SLC8A1/GJA5                                                                                 |
| Biological Process | GO:0090169 | regulation of spindle assembly                                           | 4/2279  | 24/18866  | 0.3283404 | 0.6019997 | 0.5447107 | 4  | RCC1/DYNC1H1/NUMA1/SPAG5                                                                                  |
| Biological Process | GO:0090335 | regulation of brown fat cell differentiation                             | 4/2279  | 24/18866  | 0.3283404 | 0.6019997 | 0.5447107 | 4  | RREB1/ZBTB7B/FTO/PRDM16                                                                                   |
| Biological Process | GO:0098581 | detection of external biotic stimulus                                    | 4/2279  | 24/18866  | 0.3283404 | 0.6019997 | 0.5447107 | 4  | NLRC4/PGLYRP1/NOD2/PGLYRP4                                                                                |
| Biological Process | GO:1903429 | regulation of cell maturation                                            | 4/2279  | 24/18866  | 0.3283404 | 0.6019997 | 0.5447107 | 4  | BCL11A/PPP2R1A/BCL2/NPPC                                                                                  |
| Biological Process | GO:0001101 | response to acid chemical                                                | 18/2279 | 132/18866 | 0.3285195 | 0.6022118 | 0.5449026 | 18 | RPTOR/CD9/CREB1/TNF/BCL11A/BAIAP2/PDGFD/SLC1A2/CPEB3/SH3BP4/NTRK1/DNMT1/PDGFC/CEBPB/BCL2L1/RELA/DHODH/SST |
| Biological Process | GO:0001662 | behavioral fear response                                                 | 6/2279  | 39/18866  | 0.3298295 | 0.6037977 | 0.5463376 | 6  | ASIC4/MAPK8IP2/BCL2/MEF2C/MORC1/EIF4G1                                                                    |



|                    |            |                                                  |         |           |           |           |           |    |                                                                                                                |
|--------------------|------------|--------------------------------------------------|---------|-----------|-----------|-----------|-----------|----|----------------------------------------------------------------------------------------------------------------|
| Biological Process | GO:0006778 | porphyrin-containing compound metabolic process  | 6/2279  | 39/18866  | 0.3298295 | 0.6037977 | 0.5463376 | 6  | SLC11A2/FECH/ALAS1/SPTA1/PPOX/TMEM14C                                                                          |
| Biological Process | GO:0010453 | regulation of cell fate commitment               | 6/2279  | 39/18866  | 0.3298295 | 0.6037977 | 0.5463376 | 6  | LOXL3/RBPJ/WNT11/FGFR1/PAX7/LMO4                                                                               |
| Biological Process | GO:0010831 | positive regulation of myotube differentiation   | 6/2279  | 39/18866  | 0.3298295 | 0.6037977 | 0.5463376 | 6  | EHD1/MAML1/NFATC2/BCL2/FLOT1/SCGB3A1                                                                           |
| Biological Process | GO:0038179 | neurotrophin signaling pathway                   | 6/2279  | 39/18866  | 0.3298295 | 0.6037977 | 0.5463376 | 6  | CYFIP2/RAPGEF2/SORT1/NTRK1/CYFIP1/NTF4                                                                         |
| Biological Process | GO:0055069 | zinc ion homeostasis                             | 6/2279  | 39/18866  | 0.3298295 | 0.6037977 | 0.5463376 | 6  | S100A8/LCK/SLC39A13/AP3D1/ATP7B/PRKN                                                                           |
| Biological Process | GO:0072529 | pyrimidine-containing compound catabolic process | 6/2279  | 39/18866  | 0.3298295 | 0.6037977 | 0.5463376 | 6  | CDA/DPYS/UNG/NTHL1/UPB1/TET2                                                                                   |
| Biological Process | GO:0060048 | cardiac muscle contraction                       | 19/2279 | 140/18866 | 0.3299552 | 0.6039114 | 0.5464405 | 19 | HDAC4/PDE4D/KCNE1/TTN/CASQ2/MAP2K6/CACNA1C/SLC8A1/GJA5/JUP/BIN1/NOS1AP/SMAD7/SCN1A/SNTA1/KCNQ1/GSTO1/ANK2/GRK2 |
| Biological Process | GO:0051702 | interaction with symbiont                        | 13/2279 | 93/18866  | 0.3311051 | 0.605666  | 0.5480281 | 13 | AZU1/ELANE/CTSG/CTDP1/CCL5/CSF1R/SFTPD/HDAC1/PC/PHB/AQP1/LTF/PRKN                                              |
| Biological Process | GO:0061097 | regulation of protein tyrosine kinase activity   | 13/2279 | 93/18866  | 0.3311051 | 0.605666  | 0.5480281 | 13 | TGFA/SH3BP5L/CCL5/CSF1R/NCK2/SH3BP5/DUSP22/APP/GHRL/PTPRC/PDGFB/CASS4/GGNBP2                                   |

|                    |            |                                                               |         |           |           |           |           |    |                                                                                                                                     |
|--------------------|------------|---------------------------------------------------------------|---------|-----------|-----------|-----------|-----------|----|-------------------------------------------------------------------------------------------------------------------------------------|
| Biological Process | GO:0072080 | nephron tubule development                                    | 13/2279 | 93/18866  | 0.3311051 | 0.605666  | 0.5480281 | 13 | TACSTD2/DLL1/ILK/WNT11/PAX2/MTSS1/WWTR1/BCL2/NOTCH1/MEF2C/ACAT1/LIF/HOXB7                                                           |
| Biological Process | GO:0007405 | neuroblast proliferation                                      | 9/2279  | 62/18866  | 0.3315896 | 0.6058524 | 0.5481968 | 9  | NDE1/DISC1/FGFR1/NF1/NUMB/ZNF335/NOTCH1/ARHGEF2/CX3CR1                                                                              |
| Biological Process | GO:0045824 | negative regulation of innate immune response                 | 9/2279  | 62/18866  | 0.3315896 | 0.6058524 | 0.5481968 | 9  | PPARG/TNFAIP3/HLA-F/NR1H2/GRN/NLRC5/ARRB2/TYRO3/CD96                                                                                |
| Biological Process | GO:0048635 | negative regulation of muscle organ development               | 9/2279  | 62/18866  | 0.3315896 | 0.6058524 | 0.5481968 | 9  | CTDP1/MIR199A1/VGLL4/TGFBR2/DLL1/RIPK1/TGFB1/MEIS1/MIR199A2                                                                         |
| Biological Process | GO:0055025 | positive regulation of cardiac muscle tissue development      | 9/2279  | 62/18866  | 0.3315896 | 0.6058524 | 0.5481968 | 9  | CREB1/MIR199A1/RBPJ/FGFR1/TGFB1/ARRB2/MIR199A2/NOTCH1/MEF2C                                                                         |
| Biological Process | GO:0060393 | regulation of pathway-restricted SMAD protein phosphorylation | 9/2279  | 62/18866  | 0.3315896 | 0.6058524 | 0.5481968 | 9  | LDLRAD4/SMAD7/TGFB1/BMPER/ENG/RBPMS/GDF6/INHBA/NODAL                                                                                |
| Biological Process | GO:1904589 | regulation of protein import                                  | 9/2279  | 62/18866  | 0.3315896 | 0.6058524 | 0.5481968 | 9  | ANGPT1/PIK3R1/SMAD3/SUFU/JUP/TGFB1/NF1/CDH1/CABP1                                                                                   |
| Biological Process | GO:0000187 | activation of MAPK activity                                   | 21/2279 | 156/18866 | 0.3322517 | 0.6068288 | 0.5490803 | 21 | TGFA/MAP2K6/ERN1/ARRB1/TNF/FPR1/THBS1/RIPK1/UBE2V1/MUC20/CXCL17/GHRL/PTPRC/PDE6H/IRAK2/NOD2/S1PR2/MAPKAPK3/DBNL/PRKAA1/MAP3K20      |
| Biological Process | GO:1901861 | regulation of muscle tissue development                       | 21/2279 | 156/18866 | 0.3322517 | 0.6068288 | 0.5490803 | 21 | HDAC4/CTDP1/CREB1/SMAD3/MIR199A1/VGLL4/TGFBR2/DLL1/RIPK1/RBPJ/FGFR1/TGFB1/ARRB2/ARNTL/MEIS1/BCL2/MIR199A2/NOTCH1/MEF2C/FLOT1/PRKAA1 |

|                    |            |                                                                       |         |           |           |           |           |    |                                                                                                                                                                                                                                                                          |
|--------------------|------------|-----------------------------------------------------------------------|---------|-----------|-----------|-----------|-----------|----|--------------------------------------------------------------------------------------------------------------------------------------------------------------------------------------------------------------------------------------------------------------------------|
| Biological Process | GO:0018393 | internal peptidyl-lysine acetylation                                  | 22/2279 | 164/18866 | 0.3331624 | 0.6083752 | 0.5504794 | 22 | SRCAP/BRCA2/KANSL1/ARRB1/BRD1/EPC1/RPS6KA4/TAF10/KANSL2/SPHK2/CTBP1/POR/NCOA1/CREBBP/RSF1/PER1/PIH1D1/RUVBL1/KAT7/ING5/LIF/PAXIP1                                                                                                                                        |
| Biological Process | GO:0018394 | peptidyl-lysine acetylation                                           | 23/2279 | 172/18866 | 0.333941  | 0.6096798 | 0.55166   | 23 | SRCAP/BRCA2/KANSL1/ARRB1/BRD1/EPC1/RPS6KA4/TAF10/KANSL2/SPHK2/CTBP1/POR/NCOA1/CREBBP/RSF1/PER1/PIH1D1/RUVBL1/KAT7/ING5/LIF/PAXIP1/PRKAA1                                                                                                                                 |
| Biological Process | GO:0042742 | defense response to bacterium                                         | 45/2279 | 348/18866 | 0.3352567 | 0.6113644 | 0.5531842 | 45 | DEFA4/AZU1/ELANE/CEBPE/SLPI/NLRC4/S100A8/CTSG/IRF8/LYPD8/MPO/FOXP1/IL10/LCN2/MIR140/RNASE3/LYST/SLC11A1/NLRP3/LPO/FGR/TNF/SFTPD/FPR2/TLR9/IGHV6-1/LYG2/SPON2/RBPJ/COLEC12/TNFRSF1A/DEFB124/STAB2/DEFB1/PGLYRP1/CCL20/IL6R/C10orf99/GRN/MPEG1/NOD2/LTF/CEBPB/PGLYRP4/BCL3 |
| Biological Process | GO:0072676 | lymphocyte migration                                                  | 16/2279 | 117/18866 | 0.3376936 | 0.6113644 | 0.5531842 | 16 | FUT7/PIK3CD/CCR2/CCL5/PADI2/APP/MIA3/DOCK8/WASL/RIPK3/CCL20/C10orf99/ADTRP/CCL27/CCL22/FADD                                                                                                                                                                              |
| Biological Process | GO:0010569 | regulation of double-strand break repair via homologous recombination | 7/2279  | 47/18866  | 0.3383212 | 0.6113644 | 0.5531842 | 7  | SPIDR/RMI2/SETD2/RTEL1/RECQL5/TP53BP1/FBH1                                                                                                                                                                                                                               |
| Biological Process | GO:0014003 | oligodendrocyte development                                           | 7/2279  | 47/18866  | 0.3383212 | 0.6113644 | 0.5531842 | 7  | CD9/GSN/EIF2B5/CLU/FA2H/CNTNAP1/ERCC2                                                                                                                                                                                                                                    |
| Biological Process | GO:0014075 | response to amine                                                     | 7/2279  | 47/18866  | 0.3383212 | 0.6113644 | 0.5531842 | 7  | PPP1R1B/RRM2B/ADAMTS13/RGS17/CNR2/RGS10/HNMT                                                                                                                                                                                                                             |
| Biological Process | GO:0032480 | negative regulation of type I interferon production                   | 7/2279  | 47/18866  | 0.3383212 | 0.6113644 | 0.5531842 | 7  | IL10/TNFAIP3/TRAIP/NLRC5/CYLD/HERC5/ILRUN                                                                                                                                                                                                                                |
| Biological Process | GO:0045933 | positive regulation of muscle contraction                             | 7/2279  | 47/18866  | 0.3383212 | 0.6113644 | 0.5531842 | 7  | ENO1/CTTN/NOS1AP/GHRL/KCNQ1/GSTO1/F2R                                                                                                                                                                                                                                    |

|                    |            |                                                              |        |          |           |           |           |   |                                                |
|--------------------|------------|--------------------------------------------------------------|--------|----------|-----------|-----------|-----------|---|------------------------------------------------|
| Biological Process | GO:0046677 | response to antibiotic                                       | 7/2279 | 47/18866 | 0.3383212 | 0.6113644 | 0.5531842 | 7 | ALPL/JAK1/ZC3H8/SLC1A3/MEF2C/CRIP1/KAT7        |
| Biological Process | GO:0051150 | regulation of smooth muscle cell differentiation             | 7/2279 | 47/18866 | 0.3383212 | 0.6113644 | 0.5531842 | 7 | MIR140/MIR145/NFATC2/NFATC1/PDGFB/ENG/DNMT1    |
| Biological Process | GO:0060986 | endocrine hormone secretion                                  | 7/2279 | 47/18866 | 0.3383212 | 0.6113644 | 0.5531842 | 7 | C1QTNF3/RAB11FIP1/FGFR1/CRHBP/GHRL/AGTR1/INHBA |
| Biological Process | GO:1903115 | regulation of actin filament-based movement                  | 7/2279 | 47/18866 | 0.3383212 | 0.6113644 | 0.5531842 | 7 | PDE4D/CACNA1C/GJA5/JUP/BIN1/NOS1AP/ANK2        |
| Biological Process | GO:0000076 | DNA replication checkpoint                                   | 3/2279 | 17/18866 | 0.3384164 | 0.6113644 | 0.5531842 | 3 | HUS1/CLSPN/NAE1                                |
| Biological Process | GO:0002643 | regulation of tolerance induction                            | 3/2279 | 17/18866 | 0.3384164 | 0.6113644 | 0.5531842 | 3 | PHLPP1/TGFBR2/MARCHF7                          |
| Biological Process | GO:0002716 | negative regulation of natural killer cell mediated immunity | 3/2279 | 17/18866 | 0.3384164 | 0.6113644 | 0.5531842 | 3 | HLA-F/ARRB2/CD96                               |
| Biological Process | GO:0003128 | heart field specification                                    | 3/2279 | 17/18866 | 0.3384164 | 0.6113644 | 0.5531842 | 3 | RBPJ/WNT11/MEF2C                               |
| Biological Process | GO:0003184 | pulmonary valve morphogenesis                                | 3/2279 | 17/18866 | 0.3384164 | 0.6113644 | 0.5531842 | 3 | GJA5/NFATC1/NOTCH1                             |

|                    |            |                                                                                      |        |          |           |           |           |   |                      |
|--------------------|------------|--------------------------------------------------------------------------------------|--------|----------|-----------|-----------|-----------|---|----------------------|
| Biological Process | GO:0006577 | amino-acid betaine metabolic process                                                 | 3/2279 | 17/18866 | 0.3384164 | 0.6113644 | 0.5531842 | 3 | ACADM/POR/CPT1A      |
| Biological Process | GO:0009048 | dosage compensation by inactivation of X chromosome                                  | 3/2279 | 17/18866 | 0.3384164 | 0.6113644 | 0.5531842 | 3 | CDYL/PCGF3/RBM15B    |
| Biological Process | GO:0010819 | regulation of T cell chemotaxis                                                      | 3/2279 | 17/18866 | 0.3384164 | 0.6113644 | 0.5531842 | 3 | CCR2/CCL5/CCL27      |
| Biological Process | GO:0015732 | prostaglandin transport                                                              | 3/2279 | 17/18866 | 0.3384164 | 0.6113644 | 0.5531842 | 3 | MAP2K6/ABCC2/SLCO3A1 |
| Biological Process | GO:0016246 | RNA interference                                                                     | 3/2279 | 17/18866 | 0.3384164 | 0.6113644 | 0.5531842 | 3 | AGO2/RMRP/CELF1      |
| Biological Process | GO:0016254 | preassembly of GPI anchor in ER membrane                                             | 3/2279 | 17/18866 | 0.3384164 | 0.6113644 | 0.5531842 | 3 | PIGL/PIGN/PIGQ       |
| Biological Process | GO:0021783 | preganglionic parasympathetic fiber development                                      | 3/2279 | 17/18866 | 0.3384164 | 0.6113644 | 0.5531842 | 3 | NRP2/PHOX2A/HES3     |
| Biological Process | GO:0030949 | positive regulation of vascular endothelial growth factor receptor signaling pathway | 3/2279 | 17/18866 | 0.3384164 | 0.6113644 | 0.5531842 | 3 | GRB10/PRKCB/ITGB3    |
| Biological Process | GO:0032682 | negative regulation of chemokine production                                          | 3/2279 | 17/18866 | 0.3384164 | 0.6113644 | 0.5531842 | 3 | IL10/C1QTNF3/MEFV    |

|                    |            |                                                           |        |          |           |           |           |   |                        |
|--------------------|------------|-----------------------------------------------------------|--------|----------|-----------|-----------|-----------|---|------------------------|
| Biological Process | GO:0033599 | regulation of mammary gland epithelial cell proliferation | 3/2279 | 17/18866 | 0.3384164 | 0.6113644 | 0.5531842 | 3 | RREB1/BRCA2/RTN4       |
| Biological Process | GO:0035020 | regulation of Rac protein signal transduction             | 3/2279 | 17/18866 | 0.3384164 | 0.6113644 | 0.5531842 | 3 | DNM2/NF1/ARHGAP17      |
| Biological Process | GO:0035729 | cellular response to hepatocyte growth factor stimulus    | 3/2279 | 17/18866 | 0.3384164 | 0.6113644 | 0.5531842 | 3 | IL10/CREB1/RELA        |
| Biological Process | GO:0042753 | positive regulation of circadian rhythm                   | 3/2279 | 17/18866 | 0.3384164 | 0.6113644 | 0.5531842 | 3 | GHRL/ARNTL/FBXW11      |
| Biological Process | GO:0042790 | nucleolar large rRNA transcription by RNA polymerase I    | 3/2279 | 17/18866 | 0.3384164 | 0.6113644 | 0.5531842 | 3 | PIH1D1/MARS1/MACROH2A2 |
| Biological Process | GO:0043117 | positive regulation of vascular permeability              | 3/2279 | 17/18866 | 0.3384164 | 0.6113644 | 0.5531842 | 3 | TJP2/ANGPT1/TGFB1      |
| Biological Process | GO:0043968 | histone H2A acetylation                                   | 3/2279 | 17/18866 | 0.3384164 | 0.6113644 | 0.5531842 | 3 | EPC1/SPHK2/RUVBL1      |
| Biological Process | GO:0044539 | long-chain fatty acid import into cell                    | 3/2279 | 17/18866 | 0.3384164 | 0.6113644 | 0.5531842 | 3 | ACSL1/THBS1/SLC2A1     |
| Biological Process | GO:0044764 | multi-organism cellular process                           | 3/2279 | 17/18866 | 0.3384164 | 0.6113644 | 0.5531842 | 3 | TPCN2/PI4KA/EPS15      |

|                    |            |                                                       |        |          |           |           |           |   |                      |
|--------------------|------------|-------------------------------------------------------|--------|----------|-----------|-----------|-----------|---|----------------------|
| Biological Process | GO:0046459 | short-chain fatty acid metabolic process              | 3/2279 | 17/18866 | 0.3384164 | 0.6113644 | 0.5531842 | 3 | ACSS1/ACSS2/PCK2     |
| Biological Process | GO:0048532 | anatomical structure arrangement                      | 3/2279 | 17/18866 | 0.3384164 | 0.6113644 | 0.5531842 | 3 | NRP2/DLL1/PAX2       |
| Biological Process | GO:0048535 | lymph node development                                | 3/2279 | 17/18866 | 0.3384164 | 0.6113644 | 0.5531842 | 3 | TGFB1/RIPK3/FADD     |
| Biological Process | GO:0060263 | regulation of respiratory burst                       | 3/2279 | 17/18866 | 0.3384164 | 0.6113644 | 0.5531842 | 3 | CAMK1D/GRN/BCR       |
| Biological Process | GO:0070166 | enamel mineralization                                 | 3/2279 | 17/18866 | 0.3384164 | 0.6113644 | 0.5531842 | 3 | FOXO1/FAM20C/NECTIN1 |
| Biological Process | GO:0071360 | cellular response to exogenous dsRNA                  | 3/2279 | 17/18866 | 0.3384164 | 0.6113644 | 0.5531842 | 3 | COLEC12/FLOT1/STING1 |
| Biological Process | GO:0090336 | positive regulation of brown fat cell differentiation | 3/2279 | 17/18866 | 0.3384164 | 0.6113644 | 0.5531842 | 3 | RREB1/ZBTB7B/PRDM16  |
| Biological Process | GO:0099558 | maintenance of synapse structure                      | 3/2279 | 17/18866 | 0.3384164 | 0.6113644 | 0.5531842 | 3 | DCTN1/SYNGAP1/CTBP2  |
| Biological Process | GO:0140354 | lipid import into cell                                | 3/2279 | 17/18866 | 0.3384164 | 0.6113644 | 0.5531842 | 3 | ACSL1/THBS1/SLC2A1   |

|                    |            |                                                                                            |         |           |           |           |           |    |                                                                                                                     |
|--------------------|------------|--------------------------------------------------------------------------------------------|---------|-----------|-----------|-----------|-----------|----|---------------------------------------------------------------------------------------------------------------------|
| Biological Process | GO:1900363 | regulation of mRNA polyadenylation                                                         | 3/2279  | 17/18866  | 0.3384164 | 0.6113644 | 0.5531842 | 3  | CPEB3/ZC3H3/RNF40                                                                                                   |
| Biological Process | GO:1902992 | negative regulation of amyloid precursor protein catabolic process                         | 3/2279  | 17/18866  | 0.3384164 | 0.6113644 | 0.5531842 | 3  | SORL1/BIN1/CLU                                                                                                      |
| Biological Process | GO:2001267 | regulation of cysteine-type endopeptidase activity involved in apoptotic signaling pathway | 3/2279  | 17/18866  | 0.3384164 | 0.6113644 | 0.5531842 | 3  | GSN/SMAD3/PIH1D1                                                                                                    |
| Biological Process | GO:0007368 | determination of left/right symmetry                                                       | 17/2279 | 125/18866 | 0.3392365 | 0.6113644 | 0.5531842 | 17 | SMAD3/PKD1L1/SUFU/MICAL2/TGFBR2/RFX3/DLL1/MIB1/PCSK6/AP1B1/IFT140/ENG/NOTCH1/MEF2C/TMED2/DNAI2/NODAL                |
| Biological Process | GO:0043500 | muscle adaptation                                                                          | 17/2279 | 125/18866 | 0.3392365 | 0.6113644 | 0.5531842 | 17 | HDAC4/CTDP1/GSN/MIR145/TNFRSF1B/SMAD3/PRKCA/MIR199A1/TNFRSF1A/CAMTA2/PDE9A/MIR199A2/NOTCH1/MEF2C/FOXO1/INPP5F/CASQ1 |
| Biological Process | GO:0000271 | polysaccharide biosynthetic process                                                        | 11/2279 | 78/18866  | 0.3400123 | 0.6113644 | 0.5531842 | 11 | CSGALNACT1/AP2A1/NDST1/TGFB1/DYRK2/PDGFB/PPP1CB/ESRRB/PER2/HAS3/B3GNT2                                              |
| Biological Process | GO:0043900 | regulation of multi-organism process                                                       | 11/2279 | 78/18866  | 0.3400123 | 0.6113644 | 0.5531842 | 11 | HDAC4/CALR/ARHGDI1B/RNASE10/AGO2/LHFPL2/PPP2R1A/PLCB1/NPPC/INHBA/NODAL                                              |
| Biological Process | GO:0050688 | regulation of defense response to virus                                                    | 11/2279 | 78/18866  | 0.3400123 | 0.6113644 | 0.5531842 | 11 | IL27/AIM2/TRIM38/TNFAIP3/SEC14L1/ZDHHC1/TRAF3IP2/HERC5/PARP9/STING1/ILRUN                                           |
| Biological Process | GO:0051057 | positive regulation of small GTPase mediated signal transduction                           | 11/2279 | 78/18866  | 0.3400123 | 0.6113644 | 0.5531842 | 11 | AKAP13/ITPKB/ARRB1/LRRC59/SYNPO2L/NTRK1/NOTCH1/F2R/GPR4/PDGFRB/PRAG1                                                |



|                    |            |                                                                                     |         |           |           |           |           |    |                                                                                                                                                                                                                                                                               |
|--------------------|------------|-------------------------------------------------------------------------------------|---------|-----------|-----------|-----------|-----------|----|-------------------------------------------------------------------------------------------------------------------------------------------------------------------------------------------------------------------------------------------------------------------------------|
| Biological Process | GO:0061045 | negative regulation of wound healing                                                | 11/2279 | 78/18866  | 0.3400123 | 0.6113644 | 0.5531842 | 11 | PLAU/CD9/SMAD3/TNF/UBASH3B/SERPINB2/THBS1/F12/PDGFB/CPB2/ADTRP                                                                                                                                                                                                                |
| Biological Process | GO:1903322 | positive regulation of protein modification by small protein conjugation or removal | 19/2279 | 141/18866 | 0.3416384 | 0.6113644 | 0.5531842 | 19 | HDAC4/FZR1/TOLLIP/ANGPT1/ARRB1/CUL3/SMAD7/AXIN1/MTA1/TNIP1/BCL10/ARRB2/NOD2/UBE3A/RNF40/PELI1/PAXIP1/PRKN/MARCHF7                                                                                                                                                             |
| Biological Process | GO:0051169 | nuclear transport                                                                   | 46/2279 | 357/18866 | 0.3423176 | 0.6113644 | 0.5531842 | 46 | CALR/NXF1/FIP1L1/AKAP13/ANGPT1/CPSF3/SNRPD3/PIK3R1/SETD2/RAE1/SMAD3/TNPO1/MBTPS1/E2F3/SUFU/IPO13/ATXN1/FAM53B/JUP/XPO7/TCF7L2/SMG7/XPO6/TGFB1/PABPN1/ENY2/SMURF1/BACH2/NF1/NUP93/SEC13/SMG6/ARNTL/CDH1/SNUPN/CABP1/SP100/NEDD4/TSC2/HHEX/RBM15B/NOL6/CPSF4/BANF1/PCID2/GEMIN4 |
| Biological Process | GO:0006482 | protein demethylation                                                               | 5/2279  | 32/18866  | 0.342855  | 0.6113644 | 0.5531842 | 5  | KDM4B/KDM2A/KDM1B/KDM4C/KDM7A                                                                                                                                                                                                                                                 |
| Biological Process | GO:0006858 | extracellular transport                                                             | 5/2279  | 32/18866  | 0.342855  | 0.6113644 | 0.5531842 | 5  | WWP2/RFX3/STK36/TLL1/KATNIP                                                                                                                                                                                                                                                   |
| Biological Process | GO:0008214 | protein dealkylation                                                                | 5/2279  | 32/18866  | 0.342855  | 0.6113644 | 0.5531842 | 5  | KDM4B/KDM2A/KDM1B/KDM4C/KDM7A                                                                                                                                                                                                                                                 |
| Biological Process | GO:0010165 | response to X-ray                                                                   | 5/2279  | 32/18866  | 0.342855  | 0.6113644 | 0.5531842 | 5  | BLM/BRCA2/DNM2/TP53BP1/ERCC1                                                                                                                                                                                                                                                  |
| Biological Process | GO:0032350 | regulation of hormone metabolic process                                             | 5/2279  | 32/18866  | 0.342855  | 0.6113644 | 0.5531842 | 5  | TCF7L2/RDH10/DGKQ/POR/GNB3                                                                                                                                                                                                                                                    |
| Biological Process | GO:0034367 | protein-containing complex remodeling                                               | 5/2279  | 32/18866  | 0.342855  | 0.6113644 | 0.5531842 | 5  | MPO/LIPC/ABCG1/PLTP/AGTR1                                                                                                                                                                                                                                                     |

|                    |            |                                                    |        |          |          |           |           |   |                                     |
|--------------------|------------|----------------------------------------------------|--------|----------|----------|-----------|-----------|---|-------------------------------------|
| Biological Process | GO:0035456 | response to interferon-beta                        | 5/2279 | 32/18866 | 0.342855 | 0.6113644 | 0.5531842 | 5 | AIM2/MNDA/DDX41/STING1/SHFL         |
| Biological Process | GO:0042168 | heme metabolic process                             | 5/2279 | 32/18866 | 0.342855 | 0.6113644 | 0.5531842 | 5 | SLC11A2/FECH/ALAS1/PPOX/TMEM14C     |
| Biological Process | GO:0045589 | regulation of regulatory T cell differentiation    | 5/2279 | 32/18866 | 0.342855 | 0.6113644 | 0.5531842 | 5 | RUNX1/NFATC2/FANCA/LILRB4/V SIR     |
| Biological Process | GO:0046475 | glycerophospholipid catabolic process              | 5/2279 | 32/18866 | 0.342855 | 0.6113644 | 0.5531842 | 5 | PLA2G15/LIPC/ABHD16A/ABHD16B/INPP5F |
| Biological Process | GO:0060317 | cardiac epithelial to mesenchymal transition       | 5/2279 | 32/18866 | 0.342855 | 0.6113644 | 0.5531842 | 5 | RTN4/TGFBR2/RBPJ/ENG/NOTCH1         |
| Biological Process | GO:0071875 | adrenergic receptor signaling pathway              | 5/2279 | 32/18866 | 0.342855 | 0.6113644 | 0.5531842 | 5 | PDE4D/AKAP13/ADCY9/GNAI2/RAPGEF2    |
| Biological Process | GO:0086019 | cell-cell signaling involved in cardiac conduction | 5/2279 | 32/18866 | 0.342855 | 0.6113644 | 0.5531842 | 5 | CASQ2/CACNA1C/GJA5/KCNQ1/ANK2       |
| Biological Process | GO:0097106 | postsynaptic density organization                  | 5/2279 | 32/18866 | 0.342855 | 0.6113644 | 0.5531842 | 5 | ZMYND8/SYNGAP1/NRXN1/NRXN2/SHANK2   |
| Biological Process | GO:0098810 | neurotransmitter reuptake                          | 5/2279 | 32/18866 | 0.342855 | 0.6113644 | 0.5531842 | 5 | SLC1A2/ITGB3/PER2/SLC29A1/PRKN      |

|                    |            |                                                                                                                                                     |         |           |           |           |           |    |                                                                                                                                                   |
|--------------------|------------|-----------------------------------------------------------------------------------------------------------------------------------------------------|---------|-----------|-----------|-----------|-----------|----|---------------------------------------------------------------------------------------------------------------------------------------------------|
| Biological Process | GO:1902547 | regulation of cellular response to vascular endothelial growth factor stimulus                                                                      | 5/2279  | 32/18866  | 0.342855  | 0.6113644 | 0.5531842 | 5  | MIR199A1/DLL1/MIR199A2/MYO1C/ADGRA2                                                                                                               |
| Biological Process | GO:1903959 | regulation of anion transmembrane transport                                                                                                         | 5/2279  | 32/18866  | 0.342855  | 0.6113644 | 0.5531842 | 5  | THBS1/RIPK1/SLC43A2/PER2/SLC43A1                                                                                                                  |
| Biological Process | GO:0034637 | cellular carbohydrate biosynthetic process                                                                                                          | 12/2279 | 86/18866  | 0.3430407 | 0.6113644 | 0.5531842 | 12 | CSGALNACT1/PGP/NDST1/DYRK2/PPP1CB/IMPA2/ESRRB/PER2/PCK2/SLC2A1/HAS3/B3GNT2                                                                        |
| Biological Process | GO:0048634 | regulation of muscle organ development                                                                                                              | 21/2279 | 157/18866 | 0.343337  | 0.6113644 | 0.5531842 | 21 | HDAC4/CTDP1/CREB1/SMAD3/MIR199A1/VGLL4/TGFBR2/DLL1/RIPK1/RBPJ/FGFR1/TGFB1/ARRB2/ARNTL/MEIS1/BCL2/MIR199A2/NOTCH1/MEF2C/FLOT1/PRKAA1               |
| Biological Process | GO:0098739 | import across plasma membrane                                                                                                                       | 21/2279 | 157/18866 | 0.343337  | 0.6113644 | 0.5531842 | 21 | TRPM2/KCNJ15/SLC2A5/FXYD2/SLC1A5/SLC8A1/THBS1/SLC43A2/SLC19A1/SLC1A2/SLC7A5/SLC1A6/PER2/SLC1A3/SLC43A1/SLC2A1/SLC7A8/TRPV2/SLC12A1/SLC7A1/SLC12A7 |
| Biological Process | GO:0035065 | regulation of histone acetylation                                                                                                                   | 8/2279  | 55/18866  | 0.3445806 | 0.6113644 | 0.5531842 | 8  | ARRB1/RPS6KA4/SPHK2/CTBP1/PIH1D1/KAT7/LIF/PAXIP1                                                                                                  |
| Biological Process | GO:0046164 | alcohol catabolic process                                                                                                                           | 8/2279  | 55/18866  | 0.3445806 | 0.6113644 | 0.5531842 | 8  | SYNJ2/INPP5A/ALDH2/AKR1D1/NUDT3/SULT1A2/INPP5E/IMPA2                                                                                              |
| Biological Process | GO:0000338 | protein deneddylation                                                                                                                               | 2/2279  | 10/18866  | 0.3448376 | 0.6113644 | 0.5531842 | 2  | COP55/COP53                                                                                                                                       |
| Biological Process | GO:0000447 | endonucleolytic cleavage in ITS1 to separate SSU-rRNA from 5.8S rRNA and LSU-rRNA from tricistronic rRNA transcript (SSU-rRNA, 5.8S rRNA, LSU-rRNA) | 2/2279  | 10/18866  | 0.3448376 | 0.6113644 | 0.5531842 | 2  | RCL1/NOP14                                                                                                                                        |

|                    |            |                                                                   |        |          |           |           |           |   |               |
|--------------------|------------|-------------------------------------------------------------------|--------|----------|-----------|-----------|-----------|---|---------------|
| Biological Process | GO:0002664 | regulation of T cell tolerance induction                          | 2/2279 | 10/18866 | 0.3448376 | 0.6113644 | 0.5531842 | 2 | PHLPP1/TGFBR2 |
| Biological Process | GO:0003149 | membranous septum morphogenesis                                   | 2/2279 | 10/18866 | 0.3448376 | 0.6113644 | 0.5531842 | 2 | TGFBR2/NSD2   |
| Biological Process | GO:0003183 | mitral valve morphogenesis                                        | 2/2279 | 10/18866 | 0.3448376 | 0.6113644 | 0.5531842 | 2 | ZFPM1/NOTCH1  |
| Biological Process | GO:0003211 | cardiac ventricle formation                                       | 2/2279 | 10/18866 | 0.3448376 | 0.6113644 | 0.5531842 | 2 | NOTCH1/MEF2C  |
| Biological Process | GO:0003307 | regulation of Wnt signaling pathway involved in heart development | 2/2279 | 10/18866 | 0.3448376 | 0.6113644 | 0.5531842 | 2 | RBPJ/WNT11    |
| Biological Process | GO:0006222 | UMP biosynthetic process                                          | 2/2279 | 10/18866 | 0.3448376 | 0.6113644 | 0.5531842 | 2 | UCK2/DHODH    |
| Biological Process | GO:0006655 | phosphatidylglycerol biosynthetic process                         | 2/2279 | 10/18866 | 0.3448376 | 0.6113644 | 0.5531842 | 2 | PGS1/CDS2     |
| Biological Process | GO:0006971 | hypotonic response                                                | 2/2279 | 10/18866 | 0.3448376 | 0.6113644 | 0.5531842 | 2 | MYLK/CAB39    |
| Biological Process | GO:0007440 | foregut morphogenesis                                             | 2/2279 | 10/18866 | 0.3448376 | 0.6113644 | 0.5531842 | 2 | SMAD3/NOTCH1  |

|                    |            |                                                                           |        |          |           |           |           |   |                   |
|--------------------|------------|---------------------------------------------------------------------------|--------|----------|-----------|-----------|-----------|---|-------------------|
| Biological Process | GO:0009173 | pyrimidine ribonucleoside monophosphate metabolic process                 | 2/2279 | 10/18866 | 0.3448376 | 0.6113644 | 0.5531842 | 2 | UCK2/DHODH        |
| Biological Process | GO:0009174 | pyrimidine ribonucleoside monophosphate biosynthetic process              | 2/2279 | 10/18866 | 0.3448376 | 0.6113644 | 0.5531842 | 2 | UCK2/DHODH        |
| Biological Process | GO:0010587 | miRNA catabolic process                                                   | 2/2279 | 10/18866 | 0.3448376 | 0.6113644 | 0.5531842 | 2 | DIS3L2/SND1       |
| Biological Process | GO:0010615 | positive regulation of cardiac muscle adaptation                          | 2/2279 | 10/18866 | 0.3448376 | 0.6113644 | 0.5531842 | 2 | MIR199A1/MIR199A2 |
| Biological Process | GO:0010749 | regulation of nitric oxide mediated signal transduction                   | 2/2279 | 10/18866 | 0.3448376 | 0.6113644 | 0.5531842 | 2 | THBS1/NOS1AP      |
| Biological Process | GO:0014041 | regulation of neuron maturation                                           | 2/2279 | 10/18866 | 0.3448376 | 0.6113644 | 0.5531842 | 2 | BCL11A/BCL2       |
| Biological Process | GO:0014877 | response to muscle inactivity involved in regulation of muscle adaptation | 2/2279 | 10/18866 | 0.3448376 | 0.6113644 | 0.5531842 | 2 | HDAC4/CASQ1       |
| Biological Process | GO:0014894 | response to denervation involved in regulation of muscle adaptation       | 2/2279 | 10/18866 | 0.3448376 | 0.6113644 | 0.5531842 | 2 | HDAC4/CASQ1       |
| Biological Process | GO:0015696 | ammonium transport                                                        | 2/2279 | 10/18866 | 0.3448376 | 0.6113644 | 0.5531842 | 2 | AQP1/SLC12A7      |

|                    |            |                                                                   |        |          |           |           |           |   |                |
|--------------------|------------|-------------------------------------------------------------------|--------|----------|-----------|-----------|-----------|---|----------------|
| Biological Process | GO:0015808 | L-alanine transport                                               | 2/2279 | 10/18866 | 0.3448376 | 0.6113644 | 0.5531842 | 2 | SLC36A3/SLC7A8 |
| Biological Process | GO:0015851 | nucleobase transport                                              | 2/2279 | 10/18866 | 0.3448376 | 0.6113644 | 0.5531842 | 2 | SLC23A1/AQP9   |
| Biological Process | GO:0021548 | pons development                                                  | 2/2279 | 10/18866 | 0.3448376 | 0.6113644 | 0.5531842 | 2 | PHOX2A/BCL2    |
| Biological Process | GO:0031125 | rRNA 3'-end processing                                            | 2/2279 | 10/18866 | 0.3448376 | 0.6113644 | 0.5531842 | 2 | EXOSC2/ERI3    |
| Biological Process | GO:0031848 | protection from non-homologous end joining at telomere            | 2/2279 | 10/18866 | 0.3448376 | 0.6113644 | 0.5531842 | 2 | ERCC1/TFIP11   |
| Biological Process | GO:0034085 | establishment of sister chromatid cohesion                        | 2/2279 | 10/18866 | 0.3448376 | 0.6113644 | 0.5531842 | 2 | RB1/CDC45      |
| Biological Process | GO:0034427 | nuclear-transcribed mRNA catabolic process, exonucleolytic, 3'-5' | 2/2279 | 10/18866 | 0.3448376 | 0.6113644 | 0.5531842 | 2 | EXOSC2/DIS3L2  |
| Biological Process | GO:0035524 | proline transmembrane transport                                   | 2/2279 | 10/18866 | 0.3448376 | 0.6113644 | 0.5531842 | 2 | SLC36A3/SLC7A8 |
| Biological Process | GO:0035907 | dorsal aorta development                                          | 2/2279 | 10/18866 | 0.3448376 | 0.6113644 | 0.5531842 | 2 | RBPJ/ENG       |

|                    |            |                                                                       |        |          |           |           |           |   |             |
|--------------------|------------|-----------------------------------------------------------------------|--------|----------|-----------|-----------|-----------|---|-------------|
| Biological Process | GO:0036490 | regulation of translation in response to endoplasmic reticulum stress | 2/2279 | 10/18866 | 0.3448376 | 0.6113644 | 0.5531842 | 2 | NCK2/EIF4G1 |
| Biological Process | GO:0036500 | ATF6-mediated unfolded protein response                               | 2/2279 | 10/18866 | 0.3448376 | 0.6113644 | 0.5531842 | 2 | CALR/MBTPS1 |
| Biological Process | GO:0042541 | hemoglobin biosynthetic process                                       | 2/2279 | 10/18866 | 0.3448376 | 0.6113644 | 0.5531842 | 2 | ALAS1/INHBA |
| Biological Process | GO:0045348 | positive regulation of MHC class II biosynthetic process              | 2/2279 | 10/18866 | 0.3448376 | 0.6113644 | 0.5531842 | 2 | AZU1/IL10   |
| Biological Process | GO:0045625 | regulation of T-helper 1 cell differentiation                         | 2/2279 | 10/18866 | 0.3448376 | 0.6113644 | 0.5531842 | 2 | IL27/HLX    |
| Biological Process | GO:0045654 | positive regulation of megakaryocyte differentiation                  | 2/2279 | 10/18866 | 0.3448376 | 0.6113644 | 0.5531842 | 2 | TESC/MTURN  |
| Biological Process | GO:0045713 | low-density lipoprotein particle receptor biosynthetic process        | 2/2279 | 10/18866 | 0.3448376 | 0.6113644 | 0.5531842 | 2 | PPARG/ITGB3 |
| Biological Process | GO:0045876 | positive regulation of sister chromatid cohesion                      | 2/2279 | 10/18866 | 0.3448376 | 0.6113644 | 0.5531842 | 2 | NSMCE2/SLF1 |
| Biological Process | GO:0045988 | negative regulation of striated muscle contraction                    | 2/2279 | 10/18866 | 0.3448376 | 0.6113644 | 0.5531842 | 2 | BIN1/GRK2   |

|                    |            |                                                          |        |          |           |           |           |   |               |
|--------------------|------------|----------------------------------------------------------|--------|----------|-----------|-----------|-----------|---|---------------|
| Biological Process | GO:0046049 | UMP metabolic process                                    | 2/2279 | 10/18866 | 0.3448376 | 0.6113644 | 0.5531842 | 2 | UCK2/DHODH    |
| Biological Process | GO:0046548 | retinal rod cell development                             | 2/2279 | 10/18866 | 0.3448376 | 0.6113644 | 0.5531842 | 2 | RPGRIP1/NRL   |
| Biological Process | GO:0046598 | positive regulation of viral entry into host cell        | 2/2279 | 10/18866 | 0.3448376 | 0.6113644 | 0.5531842 | 2 | P4HB/TRIM38   |
| Biological Process | GO:0046710 | GDP metabolic process                                    | 2/2279 | 10/18866 | 0.3448376 | 0.6113644 | 0.5531842 | 2 | TJP2/GUK1     |
| Biological Process | GO:0048304 | positive regulation of isotype switching to IgG isotypes | 2/2279 | 10/18866 | 0.3448376 | 0.6113644 | 0.5531842 | 2 | PTPRC/PAXIP1  |
| Biological Process | GO:0048340 | paraxial mesoderm morphogenesis                          | 2/2279 | 10/18866 | 0.3448376 | 0.6113644 | 0.5531842 | 2 | SMAD3/WNT11   |
| Biological Process | GO:0048755 | branching morphogenesis of a nerve                       | 2/2279 | 10/18866 | 0.3448376 | 0.6113644 | 0.5531842 | 2 | BCL11A/RTN4   |
| Biological Process | GO:0051231 | spindle elongation                                       | 2/2279 | 10/18866 | 0.3448376 | 0.6113644 | 0.5531842 | 2 | NUMA1/PPP2R1A |
| Biological Process | GO:0051918 | negative regulation of fibrinolysis                      | 2/2279 | 10/18866 | 0.3448376 | 0.6113644 | 0.5531842 | 2 | THBS1/CPB2    |



|                    |            |                                                          |        |          |           |           |           |   |              |
|--------------------|------------|----------------------------------------------------------|--------|----------|-----------|-----------|-----------|---|--------------|
| Biological Process | GO:0071104 | response to interleukin-9                                | 2/2279 | 10/18866 | 0.3448376 | 0.6113644 | 0.5531842 | 2 | STAT5A/JAK1  |
| Biological Process | GO:0071313 | cellular response to caffeine                            | 2/2279 | 10/18866 | 0.3448376 | 0.6113644 | 0.5531842 | 2 | CASQ2/SLC8A1 |
| Biological Process | GO:0071649 | regulation of chemokine (C-C motif) ligand 5 production  | 2/2279 | 10/18866 | 0.3448376 | 0.6113644 | 0.5531842 | 2 | IL10/DEFB124 |
| Biological Process | GO:0071670 | smooth muscle cell chemotaxis                            | 2/2279 | 10/18866 | 0.3448376 | 0.6113644 | 0.5531842 | 2 | PDGFD/PDGFRB |
| Biological Process | GO:0071863 | regulation of cell proliferation in bone marrow          | 2/2279 | 10/18866 | 0.3448376 | 0.6113644 | 0.5531842 | 2 | MAP3K3/MEF2C |
| Biological Process | GO:0072488 | ammonium transmembrane transport                         | 2/2279 | 10/18866 | 0.3448376 | 0.6113644 | 0.5531842 | 2 | AQP1/SLC12A7 |
| Biological Process | GO:0072530 | purine-containing compound transmembrane transport       | 2/2279 | 10/18866 | 0.3448376 | 0.6113644 | 0.5531842 | 2 | SLC29A1/AQP9 |
| Biological Process | GO:0075294 | positive regulation by symbiont of entry into host       | 2/2279 | 10/18866 | 0.3448376 | 0.6113644 | 0.5531842 | 2 | P4HB/TRIM38  |
| Biological Process | GO:0086070 | SA node cell to atrial cardiac muscle cell communication | 2/2279 | 10/18866 | 0.3448376 | 0.6113644 | 0.5531842 | 2 | GJA5/ANK2    |

|                    |            |                                                                              |        |          |           |           |           |   |                 |
|--------------------|------------|------------------------------------------------------------------------------|--------|----------|-----------|-----------|-----------|---|-----------------|
| Biological Process | GO:0090009 | primitive streak formation                                                   | 2/2279 | 10/18866 | 0.3448376 | 0.6113644 | 0.5531842 | 2 | NODAL/OTX2      |
| Biological Process | GO:0090037 | positive regulation of protein kinase C signaling                            | 2/2279 | 10/18866 | 0.3448376 | 0.6113644 | 0.5531842 | 2 | WNT11/SPHK2     |
| Biological Process | GO:0090043 | regulation of tubulin deacetylation                                          | 2/2279 | 10/18866 | 0.3448376 | 0.6113644 | 0.5531842 | 2 | NEK3/PRKAA1     |
| Biological Process | GO:0090070 | positive regulation of ribosome biogenesis                                   | 2/2279 | 10/18866 | 0.3448376 | 0.6113644 | 0.5531842 | 2 | WDR43/RIOK1     |
| Biological Process | GO:0090649 | response to oxygen-glucose deprivation                                       | 2/2279 | 10/18866 | 0.3448376 | 0.6113644 | 0.5531842 | 2 | AQP3/DNM1L      |
| Biological Process | GO:0090673 | endothelial cell-matrix adhesion                                             | 2/2279 | 10/18866 | 0.3448376 | 0.6113644 | 0.5531842 | 2 | RIN2/CEACAM6    |
| Biological Process | GO:0098722 | asymmetric stem cell division                                                | 2/2279 | 10/18866 | 0.3448376 | 0.6113644 | 0.5531842 | 2 | ZBTB16/ARHGEF2  |
| Biological Process | GO:0098779 | positive regulation of mitophagy in response to mitochondrial depolarization | 2/2279 | 10/18866 | 0.3448376 | 0.6113644 | 0.5531842 | 2 | SMURF1/PRKN     |
| Biological Process | GO:0099612 | protein localization to axon                                                 | 2/2279 | 10/18866 | 0.3448376 | 0.6113644 | 0.5531842 | 2 | EPB41L3/CNTNAP1 |

|                    |            |                                                                                  |        |          |           |           |           |   |                   |
|--------------------|------------|----------------------------------------------------------------------------------|--------|----------|-----------|-----------|-----------|---|-------------------|
| Biological Process | GO:1901203 | positive regulation of extracellular matrix assembly                             | 2/2279 | 10/18866 | 0.3448376 | 0.6113644 | 0.5531842 | 2 | SMAD3/TGFB1       |
| Biological Process | GO:1901725 | regulation of histone deacetylase activity                                       | 2/2279 | 10/18866 | 0.3448376 | 0.6113644 | 0.5531842 | 2 | C6orf89/SPHK2     |
| Biological Process | GO:1901838 | positive regulation of transcription of nucleolar large rRNA by RNA polymerase I | 2/2279 | 10/18866 | 0.3448376 | 0.6113644 | 0.5531842 | 2 | PIH1D1/MARS1      |
| Biological Process | GO:1901894 | regulation of ATPase-coupled calcium transmembrane transporter activity          | 2/2279 | 10/18866 | 0.3448376 | 0.6113644 | 0.5531842 | 2 | THADA/TLR9        |
| Biological Process | GO:1902023 | L-arginine transport                                                             | 2/2279 | 10/18866 | 0.3448376 | 0.6113644 | 0.5531842 | 2 | SLC11A1/SLC7A1    |
| Biological Process | GO:1903244 | positive regulation of cardiac muscle hypertrophy in response to stress          | 2/2279 | 10/18866 | 0.3448376 | 0.6113644 | 0.5531842 | 2 | MIR199A1/MIR199A2 |
| Biological Process | GO:1904338 | regulation of dopaminergic neuron differentiation                                | 2/2279 | 10/18866 | 0.3448376 | 0.6113644 | 0.5531842 | 2 | CSNK1D/CSNK1E     |
| Biological Process | GO:1904684 | negative regulation of metalloendopeptidase activity                             | 2/2279 | 10/18866 | 0.3448376 | 0.6113644 | 0.5531842 | 2 | SORL1/MIR24-2     |
| Biological Process | GO:2000048 | negative regulation of cell-cell adhesion mediated by cadherin                   | 2/2279 | 10/18866 | 0.3448376 | 0.6113644 | 0.5531842 | 2 | NOTCH1/NOTCH4     |

|                    |            |                                                 |         |           |           |           |           |    |                                                                                                                                                                                                                         |                                                                                              |
|--------------------|------------|-------------------------------------------------|---------|-----------|-----------|-----------|-----------|----|-------------------------------------------------------------------------------------------------------------------------------------------------------------------------------------------------------------------------|----------------------------------------------------------------------------------------------|
| Biological Process | GO:2000169 | regulation of peptidyl-cysteine S-nitrosylation | 2/2279  | 10/18866  | 0.3448376 | 0.6113644 | 0.5531842 | 2  |                                                                                                                                                                                                                         | NOS1AP/SNTA1                                                                                 |
| Biological Process | GO:2000234 | positive regulation of rRNA processing          | 2/2279  | 10/18866  | 0.3448376 | 0.6113644 | 0.5531842 | 2  |                                                                                                                                                                                                                         | WDR43/RIOK1                                                                                  |
| Biological Process | GO:2000288 | positive regulation of myoblast proliferation   | 2/2279  | 10/18866  | 0.3448376 | 0.6113644 | 0.5531842 | 2  |                                                                                                                                                                                                                         | PAX7/MEIS2                                                                                   |
| Biological Process | GO:2000786 | positive regulation of autophagosome assembly   | 2/2279  | 10/18866  | 0.3448376 | 0.6113644 | 0.5531842 | 2  |                                                                                                                                                                                                                         | ULK1/PIP4K2A                                                                                 |
| Biological Process | GO:0034504 | protein localization to nucleus                 | 36/2279 | 277/18866 | 0.3453081 | 0.6120844 | 0.5538357 | 36 | CALR/TRIM8/SYNE1/ANGPT1/PIK3R1/SMAD3/TNPO1/MBTPS1/E2F3/SUFU/IPO13/FAM53B/ZBTB16/JUP/TGFB1/LILRB4/NF1/NUP93/DNAJB6/ARNTL/CDH1/SNUPN/MORC3/CABP1/SP100/TOR1B/TSC2/HHEX/PLRG1/BCL3/KAT7/XPA/CCT6A/PARP9/LIF/ILRUN          |                                                                                              |
| Biological Process | GO:0010660 | regulation of muscle cell apoptotic process     | 13/2279 | 94/18866  | 0.3455127 | 0.6121577 | 0.553902  | 13 |                                                                                                                                                                                                                         | PPARG/MIR140/MIR145/ARRB1/E2F3/MIR199A1/MIR24-2/ILK/NFE2L2/ARRB2/MIR138-2/MIR199A2/DNMT1     |
| Biological Process | GO:1901264 | carbohydrate derivative transport               | 13/2279 | 94/18866  | 0.3455127 | 0.6121577 | 0.553902  | 13 |                                                                                                                                                                                                                         | SLC25A25/MFSD2A/SLC35C2/SLC29A3/ABCG1/PLTP/RALBP1/SLC37A1/GUK1/SLC33A1/PRKCE/SLC29A1/SLC25A1 |
| Biological Process | GO:0009749 | response to glucose                             | 26/2279 | 197/18866 | 0.3455428 | 0.6121577 | 0.553902  | 26 | NADK/LRP5L/ERN1/SLC8A1/ARRB1/GPLD1/EIF2B5/TGFBR2/THBS1/TCF7L2/IGF1R/PTPRN2/PAX2/ENY2/GIPR/GHRL/KLF7/FIS1/PIH1D1/PRKCE/CPB2/PCK2/SREBF1/SLC29A1/C2CD2L/PKAA1                                                             |                                                                                              |
| Biological Process | GO:0015931 | nucleobase-containing compound transport        | 34/2279 | 261/18866 | 0.3456587 | 0.612249  | 0.5539846 | 34 | SLC25A25/NXF1/FIP1L1/TNKS/SLC35C2/CPSF3/SETD2/RAE1/SLC29A3/TGFBR2/RIPK1/SMG7/PABPN1/ENY2/BICD2/NUP93/IGF2BP3/SEC13/KIF5C/SMG6/SNUPN/SLC33A1/ABCC11/MYO1C/HHEX/ZC3H3/RBM15B/SLC29A1/NOL6/CPSF4/FLOT1/SLC25A1/PCID2/NCBP3 |                                                                                              |

|                    |            |                                                                         |         |           |           |           |           |    |                                                                                                                                                                                                      |
|--------------------|------------|-------------------------------------------------------------------------|---------|-----------|-----------|-----------|-----------|----|------------------------------------------------------------------------------------------------------------------------------------------------------------------------------------------------------|
| Biological Process | GO:0031668 | cellular response to extracellular stimulus                             | 33/2279 | 253/18866 | 0.3457897 | 0.6123667 | 0.5540912 | 33 | RPTOR/PRKAG2/PPARG/LCN2/MFSD2A/TNKS/ULK1/VDR/CBS/WIPI2/COMT/EHMT2/STK24/CLEC16A/SLC1A2/ATG14/PTPRC/NCOA1/NFE2L2/BCL2/AQP3/DNM1L/GLRX2/USF2/CD68/SLC2A1/FOXO1/SREBF1/EIF4G1/NPRL2/PRKAA1/MARS1/RIPOR1 |
| Biological Process | GO:0042593 | glucose homeostasis                                                     | 32/2279 | 245/18866 | 0.3458871 | 0.6124085 | 0.554129  | 32 | FOXK1/NADK/HK1/PPARG/LRP5L/ERN1/PIK3R1/ARRB1/GPLD1/TCF7L2/IGF1R/HNF1A/PTPRN2/PAX2/ENY2/HK2/GHRL/KLF7/SLC16A1/FIS1/PIH1D1/PRKCE/CPB2/PCK2/FOXO1/MBD5/SLC29A1/RPH3AL/ASPSCR1/C2CD2L/PRKAA1/CCN4        |
| Biological Process | GO:0031669 | cellular response to nutrient levels                                    | 29/2279 | 221/18866 | 0.3459422 | 0.6124085 | 0.554129  | 29 | RPTOR/PRKAG2/PPARG/LCN2/MFSD2A/TNKS/ULK1/VDR/WIPI2/COMT/EHMT2/STK24/CLEC16A/ATG14/NCOA1/NFE2L2/BCL2/AQP3/DNM1L/USF2/CD68/SLC2A1/FOXO1/SREBF1/EIF4G1/NPRL2/PRKAA1/MARS1/RIPOR1                        |
| Biological Process | GO:0000079 | regulation of cyclin-dependent protein serine/threonine kinase activity | 14/2279 | 102/18866 | 0.3475422 | 0.6151263 | 0.5565881 | 14 | BLM/TNFAIP3/FBXO7/LATS2/CDC25A/PDGFB/CCNH/CCNA1/HHEX/HEXIM1/CCNY/HERC5/CCNYL1/CCNP                                                                                                                   |
| Biological Process | GO:0071867 | response to monoamine                                                   | 15/2279 | 110/18866 | 0.3492139 | 0.6176045 | 0.5588305 | 15 | PDE4D/KLF16/DNM2/APP/HRH1/HTR3A/GNA11/CHRM2/PALM/KCNQ1/ARRB2/GNG2/GNAO1/DTNBP1/PRKN                                                                                                                  |
| Biological Process | GO:0071869 | response to catecholamine                                               | 15/2279 | 110/18866 | 0.3492139 | 0.6176045 | 0.5588305 | 15 | PDE4D/KLF16/DNM2/APP/HRH1/HTR3A/GNA11/CHRM2/PALM/KCNQ1/ARRB2/GNG2/GNAO1/DTNBP1/PRKN                                                                                                                  |
| Biological Process | GO:1901989 | positive regulation of cell cycle phase transition                      | 15/2279 | 110/18866 | 0.3492139 | 0.6176045 | 0.5588305 | 15 | RPTOR/BRD4/TFDP1/NSMCE2/CUL3/APP/CDC16/CDC25A/TMOD3/PLCB1/RB1/CDC45/ANAPC7/PLRG1/EIF4G1                                                                                                              |
| Biological Process | GO:0031122 | cytoplasmic microtubule organization                                    | 9/2279  | 63/18866  | 0.3493324 | 0.6176045 | 0.5588305 | 9  | DCTN1/LIMK2/CCDC88C/DYNC1H1/CCDC88B/HOOK2/NUMA1/TUBGCP2/EZR                                                                                                                                          |
| Biological Process | GO:0051893 | regulation of focal adhesion assembly                                   | 9/2279  | 63/18866  | 0.3493324 | 0.6176045 | 0.5588305 | 9  | ITGB1BP1/SMAD3/DUSP22/THBS1/PTPRJ/ACTG1/CORO1C/DUSP3/DAPK3                                                                                                                                           |

|                    |            |                                                                        |         |           |           |           |           |    |                                                                                                                                                                                                                                                                 |
|--------------------|------------|------------------------------------------------------------------------|---------|-----------|-----------|-----------|-----------|----|-----------------------------------------------------------------------------------------------------------------------------------------------------------------------------------------------------------------------------------------------------------------|
| Biological Process | GO:0090109 | regulation of cell-substrate junction assembly                         | 9/2279  | 63/18866  | 0.3493324 | 0.6176045 | 0.5588305 | 9  | ITGB1BP1/SMAD3/DUSP22/THBS1/PTPRJ/ACTG1/CORO1C/DUSP3/DAPK3                                                                                                                                                                                                      |
| Biological Process | GO:0006911 | phagocytosis, engulfment                                               | 17/2279 | 126/18866 | 0.351727  | 0.6217224 | 0.5625565 | 17 | PPARG/GSN/ELMO1/RHOH/DOCK1/RHOG/RAB31/IGHV6-1/THBS1/MYH9/MARCO/RHOBTB2/ABCA1/ARHGAP25/ITGB2/ANO6/ARHGAP12                                                                                                                                                       |
| Biological Process | GO:0016236 | macroautophagy                                                         | 40/2279 | 310/18866 | 0.3522726 | 0.6218478 | 0.5626699 | 40 | RPTOR/PRKAG2/SPTLC2/ULK1/ERN1/VPS13D/RHEB/PACS2/WIP1/LARP1/USP36/PIP4K2A/VPS26B/ATP6V1B2/FEZ2/PRKAB1/UVRAG/SMURF1/RUFY4/RAB43/CLEC16A/HTT/ATG14/TBC1D14/NPC1/VMP1/ATP6V0B/UBXN2A/NEDD4/TSC2/WDR81/MVB12A/NPRL2/PRKAA1/STING1/PRKN/ATP6V0C/ATP6V1C1/ILRUN/RUBCNL |
| Biological Process | GO:0002209 | behavioral defense response                                            | 6/2279  | 40/18866  | 0.3523215 | 0.6218478 | 0.5626699 | 6  | ASIC4/MAPK8IP2/BCL2/MEF2C/MORC1/EIF4G1                                                                                                                                                                                                                          |
| Biological Process | GO:0009187 | cyclic nucleotide metabolic process                                    | 6/2279  | 40/18866  | 0.3523215 | 0.6218478 | 0.5626699 | 6  | PDE4D/ADCY2/ADCY9/PDE9A/ADCY4/NPPC                                                                                                                                                                                                                              |
| Biological Process | GO:0010664 | negative regulation of striated muscle cell apoptotic process          | 6/2279  | 40/18866  | 0.3523215 | 0.6218478 | 0.5626699 | 6  | MIR145/MIR199A1/MIR24-2/ILK/NFE2L2/MIR199A2                                                                                                                                                                                                                     |
| Biological Process | GO:0019068 | virion assembly                                                        | 6/2279  | 40/18866  | 0.3523215 | 0.6218478 | 0.5626699 | 6  | PC/RAB43/USP6NL/NEDD4/MVB12A/SPCS1                                                                                                                                                                                                                              |
| Biological Process | GO:0051281 | positive regulation of release of sequestered calcium ion into cytosol | 6/2279  | 40/18866  | 0.3523215 | 0.6218478 | 0.5626699 | 6  | P2RY6/HTT/GSTO1/F2R/PLCG1/CASQ1                                                                                                                                                                                                                                 |
| Biological Process | GO:0071526 | semaphorin-plexin signaling pathway                                    | 6/2279  | 40/18866  | 0.3523215 | 0.6218478 | 0.5626699 | 6  | SEMA6B/PLXNC1/NRP2/SEMA4A/SEMA4B/SEMA4D                                                                                                                                                                                                                         |

|                    |            |                                                              |         |           |           |           |           |    |                                                                                                                                                                                               |
|--------------------|------------|--------------------------------------------------------------|---------|-----------|-----------|-----------|-----------|----|-----------------------------------------------------------------------------------------------------------------------------------------------------------------------------------------------|
| Biological Process | GO:1901381 | positive regulation of potassium ion transmembrane transport | 6/2279  | 40/18866  | 0.3523215 | 0.6218478 | 0.5626699 | 6  | KCNE1/DNM2/NOS1AP/KCNQ1/ANO6/ANK2                                                                                                                                                             |
| Biological Process | GO:0009855 | determination of bilateral symmetry                          | 18/2279 | 134/18866 | 0.3526575 | 0.6223251 | 0.5631019 | 18 | SMAD3/PKD1L1/SUFU/MICAL2/TGFBR2/RFX3/DLL1/MIB1/PCSK6/AP1B1/IFT140/ENG/NOTCH1/MEF2C/TMED2/DNAI2/ALDH1A2/NODAL                                                                                  |
| Biological Process | GO:0042982 | amyloid precursor protein metabolic process                  | 10/2279 | 71/18866  | 0.3530143 | 0.6228392 | 0.563567  | 10 | SORL1/TNF/ABCG1/MIR101-2/BIN1/APP/CLU/AGO2/ITM2C/RELA                                                                                                                                         |
| Biological Process | GO:0060041 | retina development in camera-type eye                        | 20/2279 | 150/18866 | 0.3540246 | 0.6245057 | 0.565075  | 20 | PDE6A/MFSD2A/LPCAT1/LRP5L/SKI/CRB1/HIPK2/DLL1/GNAT2/PAX2/BMPRI1B/RPGRI1P/ZHX2/SDK2/NRL/PDGFRB/ARHGEF15/CABP4/NPHP4/NECTIN1                                                                    |
| Biological Process | GO:0033500 | carbohydrate homeostasis                                     | 32/2279 | 246/18866 | 0.3548348 | 0.6257823 | 0.5662301 | 32 | FOXK1/NADK/HK1/PPARG/LRP5L/ERN1/PIK3R1/ARRB1/GPLD1/TCF7L2/IGF1R/HNF1A/PTPRN2/PAX2/ENY2/HK2/GHRL/KLF7/SLC16A1/FIS1/PIH1D1/PRKCE/CPB2/PCK2/FOXO1/MBD5/SLC29A1/RPH3AL/ASPSCR1/C2CD2L/PRKAA1/CCN4 |
| Biological Process | GO:0006475 | internal protein amino acid acetylation                      | 22/2279 | 166/18866 | 0.35488   | 0.6257823 | 0.5662301 | 22 | SRCAP/BRCA2/KANSL1/ARRB1/BRD1/EPC1/RPS6KA4/TAF10/KANSL2/SPHK2/CTBP1/POR/NCOA1/CREBBP/RSF1/PER1/PIH1D1/RUVBL1/KAT7/ING5/LIF/PAXIP1                                                             |
| Biological Process | GO:0006575 | cellular modified amino acid metabolic process               | 25/2279 | 190/18866 | 0.3554697 | 0.6265896 | 0.5669605 | 25 | OSBPL5/GGT1/ABHD16A/MTHFD1L/TG/CNDP2/MTHFS/ALDH4A1/ACADM/SLC19A1/GSTM5/POR/CPQ/MGST2/ABHD16B/CTSB/OSBPL10/NFE2L2/MTHFD1/HOGA1/PLA1A/GLRX2/CRYM/PTDSS2/CPT1A                                   |
| Biological Process | GO:0099111 | microtubule-based transport                                  | 25/2279 | 190/18866 | 0.3554697 | 0.6265896 | 0.5669605 | 25 | PRKCZ/NDE1/TNPO1/KIF13A/SPG7/DYNC1H1/RFX3/APP/BICD2/CLUAP1/CNIH2/HTT/KIF5C/IFT140/KIF1B/TTC21B/STK36/MAP1A/KIFAP3/AP3D1/FBXW11/NDEL1/DTNBP1/TLL1/KATNIP                                       |
| Biological Process | GO:0006809 | nitric oxide biosynthetic process                            | 11/2279 | 79/18866  | 0.3559082 | 0.6267811 | 0.5671338 | 11 | IL10/SMAD3/DNM2/MIR199A1/TNF/NOS1AP/CLU/HBB/ITGB2/MIR199A2/CX3CR1                                                                                                                             |

|                    |            |                                                                                           |         |          |           |           |           |    |                                                                      |
|--------------------|------------|-------------------------------------------------------------------------------------------|---------|----------|-----------|-----------|-----------|----|----------------------------------------------------------------------|
| Biological Process | GO:0007032 | endosome organization                                                                     | 11/2279 | 79/18866 | 0.3559082 | 0.6267811 | 0.5671338 | 11 | RAB5B/RAB27A/SNX3/VPS18/HOOK2/DNM1/PI4K2A/CORO1C/MVB12A/PHETA1/PRKN  |
| Biological Process | GO:0043407 | negative regulation of MAP kinase activity                                                | 11/2279 | 79/18866 | 0.3559082 | 0.6267811 | 0.5671338 | 11 | SPRED2/SORL1/HIPK3/DUSP14/LAX1/PTPN6/PTPRJ/NF1/PPP2R1A/RGS3/DUSP3    |
| Biological Process | GO:0071260 | cellular response to mechanical stimulus                                                  | 11/2279 | 79/18866 | 0.3559082 | 0.6267811 | 0.5671338 | 11 | HDAC4/TNFRSF1A/WNT11/AQP1/BCL10/MAP3K14/ENG/CASP1/SLC2A1/ANKRD1/FADD |
| Biological Process | GO:0099601 | regulation of neurotransmitter receptor activity                                          | 11/2279 | 79/18866 | 0.3559082 | 0.6267811 | 0.5671338 | 11 | CCR2/APP/DLGAP4/CRHBP/CNIH2/BEGAIN/MAPK8IP2/GSG1L/MEF2C/SHANK2/NPTX1 |
| Biological Process | GO:0000466 | maturation of 5.8S rRNA from tricistronic rRNA transcript (SSU-rRNA, 5.8S rRNA, LSU-rRNA) | 4/2279  | 25/18866 | 0.3572194 | 0.6279262 | 0.5681699 | 4  | EXOSC2/RCL1/ERI3/NOP14                                               |
| Biological Process | GO:0003309 | type B pancreatic cell differentiation                                                    | 4/2279  | 25/18866 | 0.3572194 | 0.6279262 | 0.5681699 | 4  | RHEB/RFX3/DLL1/ARNTL                                                 |
| Biological Process | GO:0010592 | positive regulation of lamellipodium assembly                                             | 4/2279  | 25/18866 | 0.3572194 | 0.6279262 | 0.5681699 | 4  | HDAC4/DNM2/NCKAP1/AVIL                                               |
| Biological Process | GO:0010738 | regulation of protein kinase A signaling                                                  | 4/2279  | 25/18866 | 0.3572194 | 0.6279262 | 0.5681699 | 4  | PRKAR1B/AIP/AKAP5/AKAP7                                              |
| Biological Process | GO:0032400 | melanosome localization                                                                   | 4/2279  | 25/18866 | 0.3572194 | 0.6279262 | 0.5681699 | 4  | RAB27A/CDH3/DCTN2/MYO5A                                              |



|                    |            |                                                                    |         |          |           |           |           |    |                                                                                |
|--------------------|------------|--------------------------------------------------------------------|---------|----------|-----------|-----------|-----------|----|--------------------------------------------------------------------------------|
| Biological Process | GO:0032647 | regulation of interferon-alpha production                          | 4/2279  | 25/18866 | 0.3572194 | 0.6279262 | 0.5681699 | 4  | IL10/IRF5/SETD2/TLR9                                                           |
| Biological Process | GO:0035336 | long-chain fatty-acyl-CoA metabolic process                        | 4/2279  | 25/18866 | 0.3572194 | 0.6279262 | 0.5681699 | 4  | ACSL1/FAR2/ACOT7/ACSF3                                                         |
| Biological Process | GO:0048169 | regulation of long-term neuronal synaptic plasticity               | 4/2279  | 25/18866 | 0.3572194 | 0.6279262 | 0.5681699 | 4  | APP/SYNGAP1/NF1/SYNPO                                                          |
| Biological Process | GO:0051788 | response to misfolded protein                                      | 4/2279  | 25/18866 | 0.3572194 | 0.6279262 | 0.5681699 | 4  | CUL3/CLU/F12/POMT2                                                             |
| Biological Process | GO:1905809 | negative regulation of synapse organization                        | 4/2279  | 25/18866 | 0.3572194 | 0.6279262 | 0.5681699 | 4  | DNM3/UBE3A/ARHGEF15/SLIT1                                                      |
| Biological Process | GO:0060420 | regulation of heart growth                                         | 12/2279 | 87/18866 | 0.358204  | 0.6290752 | 0.5692095 | 12 | CTDP1/MIR199A1/VGLL4/TGFBR2/RIPK1/RBPJ/FGFR1/ACACB/MEIS1/MIR199A2/NOTCH1/MEF2C |
| Biological Process | GO:0060761 | negative regulation of response to cytokine stimulus               | 12/2279 | 87/18866 | 0.358204  | 0.6290752 | 0.5692095 | 12 | PPARG/CCL5/TRAIP/PADI2/MIR24-2/MIR27A/IL1RN/NR1H2/PTPRC/NLRC5/MIR138-2/SLIT3   |
| Biological Process | GO:1903363 | negative regulation of cellular protein catabolic process          | 12/2279 | 87/18866 | 0.358204  | 0.6290752 | 0.5692095 | 12 | TRIM39/SUFU/HIPK2/UBAC2/MGAT3/DERL2/CLEC16A/PSMF1/MAP1A/BAG5/SVIP/MARCHF7      |
| Biological Process | GO:1904705 | regulation of vascular associated smooth muscle cell proliferation | 12/2279 | 87/18866 | 0.358204  | 0.6290752 | 0.5692095 | 12 | IL10/PPARG/MIR140/MEF2D/ERN1/TNF/GNAI2/MIR27A/P2RY6/PDGFB/DNMT1/MEF2C          |

|                    |            |                                                      |         |          |          |           |           |    |                                                                                    |
|--------------------|------------|------------------------------------------------------|---------|----------|----------|-----------|-----------|----|------------------------------------------------------------------------------------|
| Biological Process | GO:1990874 | vascular associated smooth muscle cell proliferation | 12/2279 | 87/18866 | 0.358204 | 0.6290752 | 0.5692095 | 12 | IL10/PPARG/MIR140/MEF2D/ERN1/TNF/GNAI2/MIR27A/P2RY6/PDGFB/DNMT1/MEF2C              |
| Biological Process | GO:0008089 | anterograde axonal transport                         | 7/2279  | 48/18866 | 0.358902 | 0.6296026 | 0.5696868 | 7  | SPG7/CNIH2/KIF5C/KIF1B/MAP1A/AP3D1/DTNBP1                                          |
| Biological Process | GO:0008206 | bile acid metabolic process                          | 7/2279  | 48/18866 | 0.358902 | 0.6296026 | 0.5696868 | 7  | AMACR/AKR1D1/ATP8B1/OSBPL6/ACOX2/NPC1/NR5A2                                        |
| Biological Process | GO:0042220 | response to cocaine                                  | 7/2279  | 48/18866 | 0.358902 | 0.6296026 | 0.5696868 | 7  | PPP1R1B/DNM2/CRHBP/HTR3A/UBE3A/HNMT/FADD                                           |
| Biological Process | GO:0051972 | regulation of telomerase activity                    | 7/2279  | 48/18866 | 0.358902 | 0.6296026 | 0.5696868 | 7  | PPARG/TNKS/HMBOX1/PARP4/GRHL2/SMG6/PARM1                                           |
| Biological Process | GO:0055010 | ventricular cardiac muscle tissue morphogenesis      | 7/2279  | 48/18866 | 0.358902 | 0.6296026 | 0.5696868 | 7  | RXRA/CCM2L/RBPJ/SMAD7/TGFB1/ENG/NOTCH1                                             |
| Biological Process | GO:0061001 | regulation of dendritic spine morphogenesis          | 7/2279  | 48/18866 | 0.358902 | 0.6296026 | 0.5696868 | 7  | BAIAP2/SIPA1L1/DNM3/DNM1L/UBE3A/CUX2/DBNL                                          |
| Biological Process | GO:0061326 | renal tubule development                             | 13/2279 | 95/18866 | 0.360035 | 0.6313571 | 0.5712743 | 13 | TACSTD2/DLL1/ILK/WNT11/PAX2/MTSS1/WWTR1/BCL2/NOTCH1/MEF2C/ACAT1/LIF/HOXB7          |
| Biological Process | GO:0097194 | execution phase of apoptosis                         | 13/2279 | 95/18866 | 0.360035 | 0.6313571 | 0.5712743 | 13 | CECR2/PAM16/DEDD2/CIDEB/STK24/DFFB/CASP7/DNASE1L3/DNM1L/CASP1/TP53BP2/BCL2L1/BLCAP |

|                    |            |                                                      |         |           |           |           |           |    |                                                                                                              |
|--------------------|------------|------------------------------------------------------|---------|-----------|-----------|-----------|-----------|----|--------------------------------------------------------------------------------------------------------------|
| Biological Process | GO:0001823 | mesonephros development                              | 14/2279 | 103/18866 | 0.3614975 | 0.6336878 | 0.5733832 | 14 | TACSTD2/SMAD3/ZBTB16/ILK/SMAD7/WNT11/PAX2/FGFR1/RARA/BMPER/CAT/BCL2/CRLF1/HOXB7                              |
| Biological Process | GO:0002042 | cell migration involved in sprouting angiogenesis    | 14/2279 | 103/18866 | 0.3614975 | 0.6336878 | 0.5733832 | 14 | MAP3K3/HDAC7/ITGB1BP1/MIR199A1/GPLD1/MIR101-2/THBS1/AKT3/MIR27A/MIR23A/MIA3/MIR199A2/NOTCH1/ADTRP            |
| Biological Process | GO:0046660 | female sex differentiation                           | 16/2279 | 119/18866 | 0.3635856 | 0.6367813 | 0.5761823 | 16 | ARID5B/BRCA2/ARRB1/EIF2B5/FANCA/BMPR1B/LHFPL2/ARRB2/BCL2/DMC1/SLIT3/UBE3A/CEBPB/BCL2L1/TYRO3/INHBA           |
| Biological Process | GO:0001755 | neural crest cell migration                          | 8/2279  | 56/18866  | 0.3636644 | 0.6367813 | 0.5761823 | 8  | SEMA6B/NRP2/ANXA6/ZEB2/SEMA4A/SEMA4B/SEMA4D/CORO1C                                                           |
| Biological Process | GO:0060688 | regulation of morphogenesis of a branching structure | 8/2279  | 56/18866  | 0.3636644 | 0.6367813 | 0.5761823 | 8  | TACSTD2/RXRA/TNF/BCL11A/RTN4/PAX2/FGFR1/HOXB7                                                                |
| Biological Process | GO:0086065 | cell communication involved in cardiac conduction    | 8/2279  | 56/18866  | 0.3636644 | 0.6367813 | 0.5761823 | 8  | PDE4D/CASQ2/CACNA1C/SLC8A1/GJA5/JUP/KCNQ1/ANK2                                                               |
| Biological Process | GO:1902017 | regulation of cilium assembly                        | 8/2279  | 56/18866  | 0.3636644 | 0.6367813 | 0.5761823 | 8  | CDKL1/DNM2/CEP135/HTT/IFT140/SDCCAG8/CYLD/SEPTIN9                                                            |
| Biological Process | GO:1903307 | positive regulation of regulated secretory pathway   | 8/2279  | 56/18866  | 0.3636644 | 0.6367813 | 0.5761823 | 8  | CD177/GAB2/FGR/RAB27A/HLA-F/SPHK2/ITGB2/DNM1L                                                                |
| Biological Process | GO:0009799 | specification of symmetry                            | 18/2279 | 135/18866 | 0.3648611 | 0.6385236 | 0.5777589 | 18 | SMAD3/PKD1L1/SUFU/MICAL2/TGFBR2/RFX3/DLL1/MIB1/PCSK6/AP1B1/IFT140/ENG/NOTCH1/MEF2C/TMED2/DNAI2/ALDH1A2/NODAL |

|                    |            |                                                |         |           |           |           |           |    |                                                                                                                                                                                                                                                                                            |
|--------------------|------------|------------------------------------------------|---------|-----------|-----------|-----------|-----------|----|--------------------------------------------------------------------------------------------------------------------------------------------------------------------------------------------------------------------------------------------------------------------------------------------|
| Biological Process | GO:0050853 | B cell receptor signaling pathway              | 18/2279 | 135/18866 | 0.3648611 | 0.6385236 | 0.5777589 | 18 | FOXP1/PIK3CD/LCK/RUNX1/NFATC2/MNDA/IGHV6-1/PTPN6/KLHL6/PRKCH/PRKCB/CD79A/BLK/PTPRC/BCL2/MEF2C/ELF1/VAV3                                                                                                                                                                                    |
| Biological Process | GO:0099024 | plasma membrane invagination                   | 18/2279 | 135/18866 | 0.3648611 | 0.6385236 | 0.5777589 | 18 | PPARG/GSN/ELMO1/RHOH/DOCK1/RHOG/RAB31/IGHV6-1/THBS1/MYH9/MARCO/RHOBTB2/ABCA1/SNX18/ARHGAP25/ITGB2/ANO6/ARHGAP12                                                                                                                                                                            |
| Biological Process | GO:1901343 | negative regulation of vasculature development | 27/2279 | 207/18866 | 0.3653679 | 0.6392929 | 0.5784549 | 27 | PPARG/MIR143/MIR145/ITGB1BP1/CCR2/COL4A2/MIR199A1/TNF/NFATC2/AGO1/SEMA4A/NFATC1/THBS1/MIR24-2/EPN2/NF1/GHRL/PDGFB/VASH1/MIR138-2/MIR199A2/NOTCH1/DNMT1/GPR4/HHEX/PDE3B/CX3CR1                                                                                                              |
| Biological Process | GO:0006261 | DNA-dependent DNA replication                  | 20/2279 | 151/18866 | 0.3655646 | 0.6393546 | 0.5785108 | 20 | BLM/POLE/BRCA2/RTEL1/E2F7/MCM5/WRNIP1/RECQL5/POLA2/EME1/RRM2B/FGFR1/MCM2/SMARCA1/GINS3/CHEK2/KAT7/POLD3/POLE4/FBH1                                                                                                                                                                         |
| Biological Process | GO:0019933 | cAMP-mediated signaling                        | 26/2279 | 199/18866 | 0.3655693 | 0.6393546 | 0.5785108 | 26 | KSR1/PDE4D/MGRN1/ADCY2/AKAP13/PRKAR1B/ADCY9/PRKCA/GNAI2/MRAP/CRTC3/RAPGEF2/DGKQ/DEFB1/GIPR/ABCA1/CNR2/ADCY4/S1PR2/GNG2/LPAR2/S1PR4/GPR4/PDE3B/ADGRG3/ADGRE3                                                                                                                                |
| Biological Process | GO:0016573 | histone acetylation                            | 21/2279 | 159/18866 | 0.3657529 | 0.6393546 | 0.5785108 | 21 | SRCAP/BRCA2/KANSL1/ARRB1/BRD1/EPC1/RPS6KA4/TAF10/KANSL2/SPHK2/CTBP1/NCOA1/CREBBP/RSF1/PER1/PIH1D1/RUVBL1/KAT7/ING5/LIF/PAXIP1                                                                                                                                                              |
| Biological Process | GO:1903311 | regulation of mRNA metabolic process           | 44/2279 | 344/18866 | 0.3658576 | 0.6393546 | 0.5785108 | 44 | RBM19/PRR5L/EXOSC2/SLC11A1/TNRC6B/SRPK2/PABPC4/TNPO1/PRKCA/LARP1/ZC3H12D/PKP1/PCBP4/SAMD4A/AGO2/PABPN1/SF1/CPEB3/DAZAP1/IGF2BP3/SFSWAP/PSMF1/CELF2/FTO/CELF1/NBAS/YWHAZ/PSMB7/PAIP1/RBFOX3/TNFSF13/NSRP1/ZC3H3/RBM15B/SECISBP2/CPSF4/RNF40/SYNERIP/EIF4G1/PSMD13/PCID2/TBRG4/TENT5C/TENT5A |
| Biological Process | GO:0007269 | neurotransmitter secretion                     | 23/2279 | 175/18866 | 0.3658742 | 0.6393546 | 0.5785108 | 23 | RAP1B/GIT1/SYN3/PTPRN2/PPFIA1/APBA2/PRKCB/MCTP2/NF1/NRXN1/VPS18/SYN2/CTBP2/CHRM2/NRXN2/RPH3A/P2RX1/DNM1L/MEF2C/SYT17/CACNA1B/DTNBP1/PRKN                                                                                                                                                   |
| Biological Process | GO:0099643 | signal release from synapse                    | 23/2279 | 175/18866 | 0.3658742 | 0.6393546 | 0.5785108 | 23 | RAP1B/GIT1/SYN3/PTPRN2/PPFIA1/APBA2/PRKCB/MCTP2/NF1/NRXN1/VPS18/SYN2/CTBP2/CHRM2/NRXN2/RPH3A/P2RX1/DNM1L/MEF2C/SYT17/CACNA1B/DTNBP1/PRKN                                                                                                                                                   |

|                    |            |                                                  |         |           |           |           |           |    |                                                                                                                                               |
|--------------------|------------|--------------------------------------------------|---------|-----------|-----------|-----------|-----------|----|-----------------------------------------------------------------------------------------------------------------------------------------------|
| Biological Process | GO:1901568 | fatty acid derivative metabolic process          | 23/2279 | 175/18866 | 0.3658742 | 0.6393546 | 0.5785108 | 23 | MGLL/ACSL1/ABCC1/FAR2/BDH1/GGT1/ABHD16A/TNFRSF1A/ACOT7/CYP4F3/MGST2/ACACA/EPHX1/ACSF3/HMGCL/DPEP2/ACAT1/SCD/ACSS3/SLC25A1/LYPLA2/ZADH2/PRXL2B |
| Biological Process | GO:0032507 | maintenance of protein location in cell          | 9/2279  | 64/18866  | 0.3672023 | 0.6412037 | 0.5801839 | 9  | SORL1/HK1/GSN/SYNE1/VPS13D/HK2/MORC3/SP100/BCL3                                                                                               |
| Biological Process | GO:0046173 | polyol biosynthetic process                      | 9/2279  | 64/18866  | 0.3672023 | 0.6412037 | 0.5801839 | 9  | SPTLC2/ITPKB/PGP/P2RY6/SPHK2/HRH1/IMPA2/PCK2/IP6K1                                                                                            |
| Biological Process | GO:1901862 | negative regulation of muscle tissue development | 9/2279  | 64/18866  | 0.3672023 | 0.6412037 | 0.5801839 | 9  | CTDP1/MIR199A1/VGLL4/TGFBR2/DLL1/RIPK1/TGFB1/MEIS1/MIR199A2                                                                                   |
| Biological Process | GO:1905268 | negative regulation of chromatin organization    | 9/2279  | 64/18866  | 0.3672023 | 0.6412037 | 0.5801839 | 9  | SKI/OTUB2/SPHK2/CTBP1/KDM4C/OTUB1/DNMT1/PIH1D1/TRIP12                                                                                         |
| Biological Process | GO:0006505 | GPI anchor metabolic process                     | 5/2279  | 33/18866  | 0.3680293 | 0.6413241 | 0.5802928 | 5  | PIGL/PIGU/GPLD1/PIGN/PIGQ                                                                                                                     |
| Biological Process | GO:0006536 | glutamate metabolic process                      | 5/2279  | 33/18866  | 0.3680293 | 0.6413241 | 0.5802928 | 5  | HAL/GGT1/MTHFS/ALDH4A1/DGLUCY                                                                                                                 |
| Biological Process | GO:0009954 | proximal/distal pattern formation                | 5/2279  | 33/18866  | 0.3680293 | 0.6413241 | 0.5802928 | 5  | CHSY1/DLL1/HOXA9/ALDH1A2/NODAL                                                                                                                |
| Biological Process | GO:0010984 | regulation of lipoprotein particle clearance     | 5/2279  | 33/18866  | 0.3680293 | 0.6413241 | 0.5802928 | 5  | MIR199A1/GPLD1/MIR27A/CSK/MIR199A2                                                                                                            |

|                    |            |                                                                                  |         |           |           |           |           |    |                                                                                                                                                                                                                                                                                                      |
|--------------------|------------|----------------------------------------------------------------------------------|---------|-----------|-----------|-----------|-----------|----|------------------------------------------------------------------------------------------------------------------------------------------------------------------------------------------------------------------------------------------------------------------------------------------------------|
| Biological Process | GO:0019692 | deoxyribose phosphate metabolic process                                          | 5/2279  | 33/18866  | 0.3680293 | 0.6413241 | 0.5802928 | 5  | UNG/NTHL1/GUK1/AK5/DCTD                                                                                                                                                                                                                                                                              |
| Biological Process | GO:0045736 | negative regulation of cyclin-dependent protein serine/threonine kinase activity | 5/2279  | 33/18866  | 0.3680293 | 0.6413241 | 0.5802928 | 5  | TNFAIP3/FBXO7/LATS2/HHEX/HEXIM1                                                                                                                                                                                                                                                                      |
| Biological Process | GO:0045879 | negative regulation of smoothed signaling pathway                                | 5/2279  | 33/18866  | 0.3680293 | 0.6413241 | 0.5802928 | 5  | MGRN1/SUFU/RUNX2/RB1/KCTD21                                                                                                                                                                                                                                                                          |
| Biological Process | GO:0048011 | neurotrophin TRK receptor signaling pathway                                      | 5/2279  | 33/18866  | 0.3680293 | 0.6413241 | 0.5802928 | 5  | CYFIP2/SORT1/NTRK1/CYFIP1/NTF4                                                                                                                                                                                                                                                                       |
| Biological Process | GO:1901797 | negative regulation of signal transduction by p53 class mediator                 | 5/2279  | 33/18866  | 0.3680293 | 0.6413241 | 0.5802928 | 5  | RRM2B/ZNF385A/BCL2/PRKN/MARCHF7                                                                                                                                                                                                                                                                      |
| Biological Process | GO:0042440 | pigment metabolic process                                                        | 10/2279 | 72/18866  | 0.3698744 | 0.6413241 | 0.5802928 | 10 | ZEB2/SLC11A2/FECH/CDH3/RAPGEF2/MYO5A/ALAS1/PPOX/BCL2/TMEM14C                                                                                                                                                                                                                                         |
| Biological Process | GO:1904427 | positive regulation of calcium ion transmembrane transport                       | 10/2279 | 72/18866  | 0.3698744 | 0.6413241 | 0.5802928 | 10 | P2RY6/HTT/GSTO1/F2R/ANK2/PLCG1/CASQ1/FGF14/STIMATE/CRACR2A                                                                                                                                                                                                                                           |
| Biological Process | GO:0045861 | negative regulation of proteolysis                                               | 47/2279 | 369/18866 | 0.3713949 | 0.6413241 | 0.5802928 | 47 | TRIM39/SLPI/CTSZ/CSTA/TIMP2/SORL1/SERPINA1/SPOCK2/IL10/RPS6KA1/APLP2/SERPINB1/ARRB1/SPINT2/MIR199A1/SUFU/TNF/MICAL1/HIPK2/SERPINB2/UBAC2/BIN1/THBS1/APP/UBE2O/MIR24-2/DERL2/PAX2/AQP1/POR/CLEC16A/NR1H2/DNAJB6/PSMF1/CRIM1/NOL3/ARRB2/MIR199A2/MAP1A/PIH1D1/CPB2/LTF/COL28A1/BAG5/PCID2/SVIP/MARCHF7 |
| Biological Process | GO:0055021 | regulation of cardiac muscle tissue growth                                       | 11/2279 | 80/18866  | 0.3719107 | 0.6413241 | 0.5802928 | 11 | CTDP1/MIR199A1/VGLL4/TGFBR2/RIPK1/RBPJ/FGFR1/MEIS1/MIR199A2/NOTCH1/MEF2C                                                                                                                                                                                                                             |

|                    |            |                                                           |        |          |           |           |           |   |                       |
|--------------------|------------|-----------------------------------------------------------|--------|----------|-----------|-----------|-----------|---|-----------------------|
| Biological Process | GO:0000712 | resolution of meiotic recombination intermediates         | 3/2279 | 18/18866 | 0.3731904 | 0.6413241 | 0.5802928 | 3 | EME1/MEIOB/SLX4       |
| Biological Process | GO:0001710 | mesodermal cell fate commitment                           | 3/2279 | 18/18866 | 0.3731904 | 0.6413241 | 0.5802928 | 3 | PAX2/FGFR1/NODAL      |
| Biological Process | GO:0006349 | regulation of gene expression by genetic imprinting       | 3/2279 | 18/18866 | 0.3731904 | 0.6413241 | 0.5802928 | 3 | KDM1B/KCNQ1/PCGF3     |
| Biological Process | GO:0006491 | N-glycan processing                                       | 3/2279 | 18/18866 | 0.3731904 | 0.6413241 | 0.5802928 | 3 | MGAT4A/ST8SIA6/MAN1C1 |
| Biological Process | GO:0006825 | copper ion transport                                      | 3/2279 | 18/18866 | 0.3731904 | 0.6413241 | 0.5802928 | 3 | SLC11A2/ATOX1/ATP7B   |
| Biological Process | GO:0010523 | negative regulation of calcium ion transport into cytosol | 3/2279 | 18/18866 | 0.3731904 | 0.6413241 | 0.5802928 | 3 | CASQ2/BCL2/GSTO1      |
| Biological Process | GO:0010766 | negative regulation of sodium ion transport               | 3/2279 | 18/18866 | 0.3731904 | 0.6413241 | 0.5802928 | 3 | PRKCE/NEDD4/HECW2     |
| Biological Process | GO:0031293 | membrane protein intracellular domain proteolysis         | 3/2279 | 18/18866 | 0.3731904 | 0.6413241 | 0.5802928 | 3 | MBTPS1/TGFB1/RELA     |
| Biological Process | GO:0032780 | negative regulation of ATPase activity                    | 3/2279 | 18/18866 | 0.3731904 | 0.6413241 | 0.5802928 | 3 | PAM16/MCM2/LTF        |

|                    |            |                                                                  |        |          |           |           |           |   |                          |
|--------------------|------------|------------------------------------------------------------------|--------|----------|-----------|-----------|-----------|---|--------------------------|
| Biological Process | GO:0034375 | high-density lipoprotein particle remodeling                     | 3/2279 | 18/18866 | 0.3731904 | 0.6413241 | 0.5802928 | 3 | LIPC/ABCG1/PLTP          |
| Biological Process | GO:0034755 | iron ion transmembrane transport                                 | 3/2279 | 18/18866 | 0.3731904 | 0.6413241 | 0.5802928 | 3 | SLC25A37/SLC11A1/SLC11A2 |
| Biological Process | GO:0035330 | regulation of hippo signaling                                    | 3/2279 | 18/18866 | 0.3731904 | 0.6413241 | 0.5802928 | 3 | MARK3/VGLL4/LIMD1        |
| Biological Process | GO:0042983 | amyloid precursor protein biosynthetic process                   | 3/2279 | 18/18866 | 0.3731904 | 0.6413241 | 0.5802928 | 3 | MIR101-2/AGO2/ITM2C      |
| Biological Process | GO:0042984 | regulation of amyloid precursor protein biosynthetic process     | 3/2279 | 18/18866 | 0.3731904 | 0.6413241 | 0.5802928 | 3 | MIR101-2/AGO2/ITM2C      |
| Biological Process | GO:0050961 | detection of temperature stimulus involved in sensory perception | 3/2279 | 18/18866 | 0.3731904 | 0.6413241 | 0.5802928 | 3 | WDR47/ARRB2/NTRK1        |
| Biological Process | GO:0051571 | positive regulation of histone H3-K4 methylation                 | 3/2279 | 18/18866 | 0.3731904 | 0.6413241 | 0.5802928 | 3 | MYB/DNMT1/PAXIP1         |
| Biological Process | GO:0060977 | coronary vasculature morphogenesis                               | 3/2279 | 18/18866 | 0.3731904 | 0.6413241 | 0.5802928 | 3 | SETD2/NOTCH1/PDGFRB      |
| Biological Process | GO:0061298 | retina vasculature development in camera-type eye                | 3/2279 | 18/18866 | 0.3731904 | 0.6413241 | 0.5802928 | 3 | LRP5L/PDGFRB/ARHGEF15    |



|                    |            |                                                                                                     |         |          |           |           |           |    |                                                                      |
|--------------------|------------|-----------------------------------------------------------------------------------------------------|---------|----------|-----------|-----------|-----------|----|----------------------------------------------------------------------|
| Biological Process | GO:0061577 | calcium ion transmembrane transport via high voltage-gated calcium channel                          | 3/2279  | 18/18866 | 0.3731904 | 0.6413241 | 0.5802928 | 3  | CACNA1C/BIN1/NOS1AP                                                  |
| Biological Process | GO:0070230 | positive regulation of lymphocyte apoptotic process                                                 | 3/2279  | 18/18866 | 0.3731904 | 0.6413241 | 0.5802928 | 3  | IL10/CCL5/ZC3H8                                                      |
| Biological Process | GO:0071786 | endoplasmic reticulum tubular network organization                                                  | 3/2279  | 18/18866 | 0.3731904 | 0.6413241 | 0.5802928 | 3  | RTN4/RTN3/ATL1                                                       |
| Biological Process | GO:0072189 | ureter development                                                                                  | 3/2279  | 18/18866 | 0.3731904 | 0.6413241 | 0.5802928 | 3  | PAX2/ALDH1A2/NFIA                                                    |
| Biological Process | GO:0097107 | postsynaptic density assembly                                                                       | 3/2279  | 18/18866 | 0.3731904 | 0.6413241 | 0.5802928 | 3  | NRXN1/NRXN2/SHANK2                                                   |
| Biological Process | GO:1900153 | positive regulation of nuclear-transcribed mRNA catabolic process, deadenylation-dependent decay    | 3/2279  | 18/18866 | 0.3731904 | 0.6413241 | 0.5802928 | 3  | TNRC6B/AGO2/CPEB3                                                    |
| Biological Process | GO:1900221 | regulation of amyloid-beta clearance                                                                | 3/2279  | 18/18866 | 0.3731904 | 0.6413241 | 0.5802928 | 3  | TNF/CLU/HDAC1                                                        |
| Biological Process | GO:1902165 | regulation of intrinsic apoptotic signaling pathway in response to DNA damage by p53 class mediator | 3/2279  | 18/18866 | 0.3731904 | 0.6413241 | 0.5802928 | 3  | ZNF385A/BCL2/MARCHF7                                                 |
| Biological Process | GO:0032410 | negative regulation of transporter activity                                                         | 12/2279 | 88/18866 | 0.3734666 | 0.6413241 | 0.5802928 | 12 | KCNE1/THADA/CASQ2/WWP2/TLR9/CAB39/GSTO1/PRKCE/NEDD4/DYSF/HECW2/CBARP |

|                    |            |                                                          |         |           |           |           |           |    |                                                                                                                                                                                  |
|--------------------|------------|----------------------------------------------------------|---------|-----------|-----------|-----------|-----------|----|----------------------------------------------------------------------------------------------------------------------------------------------------------------------------------|
| Biological Process | GO:0032755 | positive regulation of interleukin-6 production          | 12/2279 | 88/18866  | 0.3734666 | 0.6413241 | 0.5802928 | 12 | IL16/TNF/TLR9/SPON2/APP/MBP/SCIMP/IL6R/NOD2/POU2F2/F2R/ARHGEF2                                                                                                                   |
| Biological Process | GO:0046470 | phosphatidylcholine metabolic process                    | 12/2279 | 88/18866  | 0.3734666 | 0.6413241 | 0.5802928 | 12 | PLA2G15/PCYT1A/MFSD2A/LPCAT1/LIPC/GPLD1/SLC44A4/CHPT1/NR1H2/PCTP/CHKB/LPIN1                                                                                                      |
| Biological Process | GO:1903312 | negative regulation of mRNA metabolic process            | 12/2279 | 88/18866  | 0.3734666 | 0.6413241 | 0.5802928 | 12 | SLC11A1/LARP1/PKP1/PCBP4/SFSWAP/NBAS/PAIP1/SECISBP2/RNF40/SYNCRIP/TENT5C/TENT5A                                                                                                  |
| Biological Process | GO:0043624 | cellular protein complex disassembly                     | 29/2279 | 224/18866 | 0.3743838 | 0.6413241 | 0.5802928 | 29 | VILL/GSN/MRPL3/CAPG/MICAL1/MICAL2/MICAL3/NAV3/MRPL38/TMOD3/SVIL/SH3GL1/WDR1/SPTA1/ADD1/MRPS21/MRPS26/MAP1A/AVIL/FLII/ARHGEF2/MRPL28/SPTAN1/ASPH/TMOD1/AURKAIP1/SPTBN4/SPEF1/SHFL |
| Biological Process | GO:0006303 | double-strand break repair via nonhomologous end joining | 13/2279 | 96/18866  | 0.3746504 | 0.6413241 | 0.5802928 | 13 | KDM2A/UVRAG/SMARCA1/TP53BP1/ERCC1/PARP9/PAXIP1/TFIP11/PAXX/NSD2/CYREN/ABRAXAS1/BABAM2                                                                                            |
| Biological Process | GO:0001941 | postsynaptic membrane organization                       | 6/2279  | 41/18866  | 0.374923  | 0.6413241 | 0.5802928 | 6  | SSH1/ZMYND8/COLQ/ZDHHC2/NRXN1/NRXN2                                                                                                                                              |
| Biological Process | GO:0042596 | fear response                                            | 6/2279  | 41/18866  | 0.374923  | 0.6413241 | 0.5802928 | 6  | ASIC4/MAPK8IP2/BCL2/MEF2C/MORC1/EIF4G1                                                                                                                                           |
| Biological Process | GO:0045494 | photoreceptor cell maintenance                           | 6/2279  | 41/18866  | 0.374923  | 0.6413241 | 0.5802928 | 6  | CRB1/CDH23/ESRRB/CDHR1/SLC2A1/NPHP4                                                                                                                                              |
| Biological Process | GO:0070317 | negative regulation of G0 to G1 transition               | 6/2279  | 41/18866  | 0.374923  | 0.6413241 | 0.5802928 | 6  | TFDP1/MGA/EHMT2/EPC1/PHC3/E2F6                                                                                                                                                   |

|                    |            |                                                                                           |         |           |           |           |           |    |                                                                                                                                                           |
|--------------------|------------|-------------------------------------------------------------------------------------------|---------|-----------|-----------|-----------|-----------|----|-----------------------------------------------------------------------------------------------------------------------------------------------------------|
| Biological Process | GO:0071548 | response to dexamethasone                                                                 | 6/2279  | 41/18866  | 0.374923  | 0.6413241 | 0.5802928 | 6  | ABCC2/SMYD3/FECH/AQP1/PCK2/FOXO1                                                                                                                          |
| Biological Process | GO:0002504 | antigen processing and presentation of peptide or polysaccharide antigen via MHC class II | 14/2279 | 104/18866 | 0.3755407 | 0.6413241 | 0.5802928 | 14 | HLA-DMB/DCTN1/AP2A1/DNM2/DYNC1H1/CTSD/THBS1/AP1B1/DCTN2/SEC13/SEC24C/KIFAP3/SEC31A/MARCH8                                                                 |
| Biological Process | GO:0050657 | nucleic acid transport                                                                    | 26/2279 | 200/18866 | 0.3756711 | 0.6413241 | 0.5802928 | 26 | NXF1/FIP1L1/TNKS/CPSF3/SETD2/RAE1/TGFBR2/SMG7/PABPN1/ENY2/BICD2/NUP93/IGF2BP3/SEC13/KIF5C/SMG6/SNUPN/MYO1C/HHEX/ZC3H3/RBM15B/NOL6/CPSF4/FLOT1/PCID2/NCBP3 |
| Biological Process | GO:0050658 | RNA transport                                                                             | 26/2279 | 200/18866 | 0.3756711 | 0.6413241 | 0.5802928 | 26 | NXF1/FIP1L1/TNKS/CPSF3/SETD2/RAE1/TGFBR2/SMG7/PABPN1/ENY2/BICD2/NUP93/IGF2BP3/SEC13/KIF5C/SMG6/SNUPN/MYO1C/HHEX/ZC3H3/RBM15B/NOL6/CPSF4/FLOT1/PCID2/NCBP3 |
| Biological Process | GO:0051588 | regulation of neurotransmitter transport                                                  | 16/2279 | 120/18866 | 0.3766583 | 0.6413241 | 0.5802928 | 16 | RAP1B/GIT1/APBA2/PRKCB/MCTP2/NF1/VPS18/ITGB3/CHRM2/PER2/P2RX1/DNM1L/MEF2C/FLOT1/DTNBP1/PRKN                                                               |
| Biological Process | GO:0045727 | positive regulation of translation                                                        | 18/2279 | 136/18866 | 0.3771375 | 0.6413241 | 0.5802928 | 18 | RXRA/PLD1/TNF/CCL5/NCK2/EIF2B5/LARP1/KRT17/THBS1/SAMD4A/CTIF/MIF4GD/CPEB3/PKM/PAIP1/BCL3/EIF4G1/NIBAN1                                                    |
| Biological Process | GO:0006111 | regulation of gluconeogenesis                                                             | 7/2279  | 49/18866  | 0.379583  | 0.6413241 | 0.5802928 | 7  | MAEA/C1QTNF3/PGP/DGKQ/FOXO1/SOGA1/SDHAF3                                                                                                                  |
| Biological Process | GO:0061383 | trabecula morphogenesis                                                                   | 7/2279  | 49/18866  | 0.379583  | 0.6413241 | 0.5802928 | 7  | SBNO2/CCM2L/RBPI/SEMA4D/ENG/NOTCH1/FHL2                                                                                                                   |
| Biological Process | GO:0090151 | establishment of protein localization to mitochondrial membrane                           | 7/2279  | 49/18866  | 0.379583  | 0.6413241 | 0.5802928 | 7  | TFDP1/YWHAH/BMF/YWHAZ/BCL2/TP53BP2/YWHAQ                                                                                                                  |

|                    |            |                                                                      |         |           |           |           |           |    |                                                                                                                                                                                                                                                                         |
|--------------------|------------|----------------------------------------------------------------------|---------|-----------|-----------|-----------|-----------|----|-------------------------------------------------------------------------------------------------------------------------------------------------------------------------------------------------------------------------------------------------------------------------|
| Biological Process | GO:2000059 | negative regulation of ubiquitin-dependent protein catabolic process | 7/2279  | 49/18866  | 0.379583  | 0.6413241 | 0.5802928 | 7  | TRIM39/SUFU/HIPK2/CLEC16A/MAP1A/BAG5/SVIP                                                                                                                                                                                                                               |
| Biological Process | GO:0006913 | nucleocytoplasmic transport                                          | 45/2279 | 354/18866 | 0.3804565 | 0.6413241 | 0.5802928 | 45 | CALR/NXF1/FIP1L1/AKAP13/ANGPT1/CPSF3/SNRPD3/PIK3R1/SETD2/RAE1/SMAD3/TNPO1/MBTSP1/E2F3/SUFU/IPO13/ATXN1/FAM53B/JUP/XPO7/TCF7L2/SMG7/XPO6/TGFB1/PABPN1/ENY2/SMURF1/BACH2/NF1/NUP93/SEC13/SMG6/ARNTL/CDH1/SNUPN/CABP1/SP100/NEDD4/TSC2/HHEX/RBM15B/NOL6/CPSF4/PCID2/GEMIN4 |
| Biological Process | GO:0019748 | secondary metabolic process                                          | 8/2279  | 57/18866  | 0.3828412 | 0.6413241 | 0.5802928 | 8  | ZEB2/ABCC2/DDC/CDH3/RAPGEF2/MYO5A/NFE2L2/BCL2                                                                                                                                                                                                                           |
| Biological Process | GO:0061005 | cell differentiation involved in kidney development                  | 8/2279  | 57/18866  | 0.3828412 | 0.6413241 | 0.5802928 | 8  | PAX2/MTSS1/WWTR1/PDGFB/NOTCH1/MEF2C/GPR4/LIF                                                                                                                                                                                                                            |
| Biological Process | GO:0098900 | regulation of action potential                                       | 8/2279  | 57/18866  | 0.3828412 | 0.6413241 | 0.5802928 | 8  | KCNAB2/CACNA1C/GJA5/JUP/BIN1/NOS1AP/CNR2/ANK2                                                                                                                                                                                                                           |
| Biological Process | GO:0048645 | animal organ formation                                               | 9/2279  | 65/18866  | 0.3851595 | 0.6413241 | 0.5802928 | 9  | TGFBR2/RBPJ/WNT11/PAX2/FGFR1/RDH10/NOTCH1/MEF2C/NTF4                                                                                                                                                                                                                    |
| Biological Process | GO:0000272 | polysaccharide catabolic process                                     | 4/2279  | 26/18866  | 0.3860738 | 0.6413241 | 0.5802928 | 4  | AOAH/MGAM/CHIT1/PPP1CB                                                                                                                                                                                                                                                  |
| Biological Process | GO:0001672 | regulation of chromatin assembly or disassembly                      | 4/2279  | 26/18866  | 0.3860738 | 0.6413241 | 0.5802928 | 4  | PADI2/ATF7IP/DNMT1/PARP10                                                                                                                                                                                                                                               |
| Biological Process | GO:0002227 | innate immune response in mucosa                                     | 4/2279  | 26/18866  | 0.3860738 | 0.6413241 | 0.5802928 | 4  | DEFA4/RNASE3/DEFB1/LTF                                                                                                                                                                                                                                                  |

|                    |            |                                                                 |        |          |           |           |           |   |                             |
|--------------------|------------|-----------------------------------------------------------------|--------|----------|-----------|-----------|-----------|---|-----------------------------|
| Biological Process | GO:0006309 | apoptotic DNA fragmentation                                     | 4/2279 | 26/18866 | 0.3860738 | 0.6413241 | 0.5802928 | 4 | CECR2/PAM16/DFFB/DNASE1L3   |
| Biological Process | GO:0006688 | glycosphingolipid biosynthetic process                          | 4/2279 | 26/18866 | 0.3860738 | 0.6413241 | 0.5802928 | 4 | ST8SIA6/B4GALT3/FA2H/PRKAA1 |
| Biological Process | GO:0019430 | removal of superoxide radicals                                  | 4/2279 | 26/18866 | 0.3860738 | 0.6413241 | 0.5802928 | 4 | MPO/TNF/NFE2L2/SIRT3        |
| Biological Process | GO:0021884 | forebrain neuron development                                    | 4/2279 | 26/18866 | 0.3860738 | 0.6413241 | 0.5802928 | 4 | NRP2/DISC1/ZMIZ1/RAPGEF2    |
| Biological Process | GO:0033233 | regulation of protein sumoylation                               | 4/2279 | 26/18866 | 0.3860738 | 0.6413241 | 0.5802928 | 4 | HDAC4/TOLLIP/ZMIZ1/RELA     |
| Biological Process | GO:0033522 | histone H2A ubiquitination                                      | 4/2279 | 26/18866 | 0.3860738 | 0.6413241 | 0.5802928 | 4 | OTUB2/OTUB1/PCGF3/TRIP12    |
| Biological Process | GO:0042403 | thyroid hormone metabolic process                               | 4/2279 | 26/18866 | 0.3860738 | 0.6413241 | 0.5802928 | 4 | TG/CPQ/CTSB/CRYM            |
| Biological Process | GO:0048843 | negative regulation of axon extension involved in axon guidance | 4/2279 | 26/18866 | 0.3860738 | 0.6413241 | 0.5802928 | 4 | SEMA6B/SEMA4A/SEMA4B/SEMA4D |
| Biological Process | GO:0051875 | pigment granule localization                                    | 4/2279 | 26/18866 | 0.3860738 | 0.6413241 | 0.5802928 | 4 | RAB27A/CDH3/DCTN2/MYO5A     |

|                    |            |                                                                    |        |          |           |           |           |   |                            |
|--------------------|------------|--------------------------------------------------------------------|--------|----------|-----------|-----------|-----------|---|----------------------------|
| Biological Process | GO:0055083 | monovalent inorganic anion homeostasis                             | 4/2279 | 26/18866 | 0.3860738 | 0.6413241 | 0.5802928 | 4 | ABCC2/SLC12A1/CA12/SLC12A7 |
| Biological Process | GO:0060314 | regulation of ryanodine-sensitive calcium-release channel activity | 4/2279 | 26/18866 | 0.3860738 | 0.6413241 | 0.5802928 | 4 | PDE4D/CASQ2/JSRP1/GSTO1    |
| Biological Process | GO:0060384 | innervation                                                        | 4/2279 | 26/18866 | 0.3860738 | 0.6413241 | 0.5802928 | 4 | LRIG1/NTRK1/NPTX1/NTF4     |
| Biological Process | GO:0071377 | cellular response to glucagon stimulus                             | 4/2279 | 26/18866 | 0.3860738 | 0.6413241 | 0.5802928 | 4 | ADCY2/PRKAR1B/ADCY9/ADCY4  |
| Biological Process | GO:0071425 | hematopoietic stem cell proliferation                              | 4/2279 | 26/18866 | 0.3860738 | 0.6413241 | 0.5802928 | 4 | RUNX1/ETV6/KAT7/MECOM      |
| Biological Process | GO:0072202 | cell differentiation involved in metanephros development           | 4/2279 | 26/18866 | 0.3860738 | 0.6413241 | 0.5802928 | 4 | PAX2/WWTR1/PDGFB/LIF       |
| Biological Process | GO:1903010 | regulation of bone development                                     | 4/2279 | 26/18866 | 0.3860738 | 0.6413241 | 0.5802928 | 4 | POR/GHRL/LTF/RFLNA         |
| Biological Process | GO:1903020 | positive regulation of glycoprotein metabolic process              | 4/2279 | 26/18866 | 0.3860738 | 0.6413241 | 0.5802928 | 4 | TCF7L2/POMT2/PLCB1/PXYLP1  |
| Biological Process | GO:1903649 | regulation of cytoplasmic transport                                | 4/2279 | 26/18866 | 0.3860738 | 0.6413241 | 0.5802928 | 4 | SORL1/SNX3/EZR/PRKN        |

|                    |            |                                                            |         |           |           |           |           |    |                                                                                                                                   |
|--------------------|------------|------------------------------------------------------------|---------|-----------|-----------|-----------|-----------|----|-----------------------------------------------------------------------------------------------------------------------------------|
| Biological Process | GO:1904353 | regulation of telomere capping                             | 4/2279  | 26/18866  | 0.3860738 | 0.6413241 | 0.5802928 | 4  | TNKS/RTEL1/SMG6/ERCC1                                                                                                             |
| Biological Process | GO:1904861 | excitatory synapse assembly                                | 4/2279  | 26/18866  | 0.3860738 | 0.6413241 | 0.5802928 | 4  | SEMA4A/NRXN1/NRXN2/SHANK2                                                                                                         |
| Biological Process | GO:0003208 | cardiac ventricle morphogenesis                            | 10/2279 | 73/18866  | 0.3868167 | 0.6413241 | 0.5802928 | 10 | RXRA/CCM2L/TGFBR2/RBP1/SMAD7/TGFB1/GRHL2/ENG/NOTCH1/MEF2C                                                                         |
| Biological Process | GO:1902036 | regulation of hematopoietic stem cell differentiation      | 10/2279 | 73/18866  | 0.3868167 | 0.6413241 | 0.5802928 | 10 | MYB/RUNX1/TCF12/SETD1A/PSMF1/NFE2L2/PUS7/TCF3/PSMB7/PSMD13                                                                        |
| Biological Process | GO:1902117 | positive regulation of organelle assembly                  | 10/2279 | 73/18866  | 0.3868167 | 0.6413241 | 0.5802928 | 10 | ULK1/TNF/DYNC1H1/CEP135/PIP4K2A/ASAP1/HTT/NUMA1/SPAG5/SEPTIN9                                                                     |
| Biological Process | GO:0061025 | membrane fusion                                            | 22/2279 | 169/18866 | 0.3879772 | 0.6413241 | 0.5802928 | 22 | CALR/STX5/CD9/VT11A/ANKFY1/TGFBRAP1/DNM2/FOLR3/UVRAG/VPS18/VCPIP1/DNM1/DNM3/DNM1L/UBXN2A/DYSF/MX1/TSNARE1/ANXA7/VAV3/IRAG2/RUBCNL |
| Biological Process | GO:0001960 | negative regulation of cytokine-mediated signaling pathway | 11/2279 | 81/18866  | 0.3879914 | 0.6413241 | 0.5802928 | 11 | PPARG/CCL5/TRAIIP/PADI2/MIR24-2/MIR27A/IL1RN/NR1H2/PTPRC/NLRC5/SLIT3                                                              |
| Biological Process | GO:0016126 | sterol biosynthetic process                                | 11/2279 | 81/18866  | 0.3879914 | 0.6413241 | 0.5802928 | 11 | PRKAG2/IDI1/MBTPS1/ABCG1/POR/ACACB/ACACA/HMGCS1/SCD/SREBF1/PRKAA1                                                                 |
| Biological Process | GO:0010970 | transport along microtubule                                | 21/2279 | 161/18866 | 0.3884303 | 0.6413241 | 0.5802928 | 21 | PRKCZ/NDE1/TNPO1/KIF13A/SPG7/DYNC1H1/APP/BICD2/CLUAP1/CNIH2/HTT/KIF5C/IFT140/KIF1B/TTC21B/MAP1A/KIFAP3/AP3D1/FBXW11/NDEL1/DTNBP1  |

|                    |            |                                                               |         |           |           |           |           |    |                                                                                                                           |
|--------------------|------------|---------------------------------------------------------------|---------|-----------|-----------|-----------|-----------|----|---------------------------------------------------------------------------------------------------------------------------|
| Biological Process | GO:0034767 | positive regulation of ion transmembrane transport            | 21/2279 | 161/18866 | 0.3884303 | 0.6413241 | 0.5802928 | 21 | KCNE1/FXYD1/CCR2/DNM2/TESC/NOS1AP/ACTN4/P2RY6/HTR3A/HTT/KCNQ1/GSTO1/F2R/ANO6/ANK2/PLCG1/PDZK1/CASQ1/FGF14/STIMATE/CRACR2A |
| Biological Process | GO:0007260 | tyrosine phosphorylation of STAT protein                      | 12/2279 | 89/18866  | 0.3888037 | 0.6413241 | 0.5802928 | 12 | TNF/CCL5/CSF1R/TNFRSF1A/FER/IL6R/PPP2R1A/GGNBP2/INPP5F/CRLF1/PARP9/LIF                                                    |
| Biological Process | GO:0043506 | regulation of JUN kinase activity                             | 12/2279 | 89/18866  | 0.3888037 | 0.6413241 | 0.5802928 | 12 | HIPK3/ERN1/TNF/ZEB2/TRAF2/TLR9/TNIK/RIPK1/TAOK3/DTNBP1/DBNL/MAP3K20                                                       |
| Biological Process | GO:0043648 | dicarboxylic acid metabolic process                           | 13/2279 | 97/18866  | 0.3893372 | 0.6413241 | 0.5802928 | 13 | HAL/GGT1/D2HGDH/MTHFD1L/MTHFS/OGDH/ALDH4A1/SLC19A1/MTHFD1/HOGA1/ACSF3/SDHAF3/DGLUCY                                       |
| Biological Process | GO:1901216 | positive regulation of neuron death                           | 13/2279 | 97/18866  | 0.3893372 | 0.6413241 | 0.5802928 | 13 | HDAC4/CTS2/SSH1/MYB/SRPK2/TNF/CLU/ZNF746/NF1/GRN/ITGB2/FIS1/TP53BP2                                                       |
| Biological Process | GO:0019730 | antimicrobial humoral response                                | 18/2279 | 137/18866 | 0.3894741 | 0.6413241 | 0.5802928 | 18 | DEFA4/AZU1/ELANE/SLPI/PRTN3/S100A8/CTSG/LCN2/RNASE3/SLC11A1/SFTPD/SPON2/CLU/DEFB1/PGLYRP1/LTF/PGLYRP4/BCL3                |
| Biological Process | GO:0062014 | negative regulation of small molecule metabolic process       | 14/2279 | 105/18866 | 0.3896525 | 0.6413241 | 0.5802928 | 14 | MAEA/HDAC4/GFI1/CDA/AP2A1/C1QTNF3/MFSD2A/CBFA2T3/PGP/TGFB1/ACACB/SOGA1/WDTTC1/ACADVL                                      |
| Biological Process | GO:0006406 | mRNA export from nucleus                                      | 15/2279 | 113/18866 | 0.3897938 | 0.6413241 | 0.5802928 | 15 | NXF1/FIP1L1/CPSF3/SETD2/RAE1/SMG7/PABPN1/ENY2/NUP93/SEC13/SMG6/HHEX/RBM15B/CPSF4/PCID2                                    |
| Biological Process | GO:0071427 | mRNA-containing ribonucleoprotein complex export from nucleus | 15/2279 | 113/18866 | 0.3897938 | 0.6413241 | 0.5802928 | 15 | NXF1/FIP1L1/CPSF3/SETD2/RAE1/SMG7/PABPN1/ENY2/NUP93/SEC13/SMG6/HHEX/RBM15B/CPSF4/PCID2                                    |



|                    |            |                                                    |         |           |           |           |           |    |                                                                                                |
|--------------------|------------|----------------------------------------------------|---------|-----------|-----------|-----------|-----------|----|------------------------------------------------------------------------------------------------|
| Biological Process | GO:0002065 | columnar/cuboidal epithelial cell differentiation  | 16/2279 | 121/18866 | 0.3897949 | 0.6413241 | 0.5802928 | 16 | RXRA/RHEB/RFX3/DLL1/RBPJ/WNT11/FGFR1/RARA/RARG/ARNTL/NOTCH1/TMC1/CEBPB/FAM20C/NPY/NODAL        |
| Biological Process | GO:0031398 | positive regulation of protein ubiquitination      | 16/2279 | 121/18866 | 0.3897949 | 0.6413241 | 0.5802928 | 16 | FZR1/ANGPT1/ARRB1/CUL3/SMAD7/AXIN1/MTA1/BCL10/ARRB2/NOD2/UBE3A/RNF40/PELI1/PAXIP1/PRKN/MARCHF7 |
| Biological Process | GO:0000491 | small nucleolar ribonucleoprotein complex assembly | 2/2279  | 11/18866  | 0.3906575 | 0.6413241 | 0.5802928 | 2  | PIH1D1/RUVBL1                                                                                  |
| Biological Process | GO:0005984 | disaccharide metabolic process                     | 2/2279  | 11/18866  | 0.3906575 | 0.6413241 | 0.5802928 | 2  | MGAM/SLC2A1                                                                                    |
| Biological Process | GO:0006348 | chromatin silencing at telomere                    | 2/2279  | 11/18866  | 0.3906575 | 0.6413241 | 0.5802928 | 2  | DYDC2/DYDC1                                                                                    |
| Biological Process | GO:0006558 | L-phenylalanine metabolic process                  | 2/2279  | 11/18866  | 0.3906575 | 0.6413241 | 0.5802928 | 2  | HGD/FAH                                                                                        |
| Biological Process | GO:0006559 | L-phenylalanine catabolic process                  | 2/2279  | 11/18866  | 0.3906575 | 0.6413241 | 0.5802928 | 2  | HGD/FAH                                                                                        |
| Biological Process | GO:0006570 | tyrosine metabolic process                         | 2/2279  | 11/18866  | 0.3906575 | 0.6413241 | 0.5802928 | 2  | HGD/FAH                                                                                        |
| Biological Process | GO:0006857 | oligopeptide transport                             | 2/2279  | 11/18866  | 0.3906575 | 0.6413241 | 0.5802928 | 2  | ABCC1/SLC15A4                                                                                  |

|                    |            |                                                       |        |          |           |           |           |   |              |
|--------------------|------------|-------------------------------------------------------|--------|----------|-----------|-----------|-----------|---|--------------|
| Biological Process | GO:0007028 | cytoplasm organization                                | 2/2279 | 11/18866 | 0.3906575 | 0.6413241 | 0.5802928 | 2 | ZMIZ1/ETV6   |
| Biological Process | GO:0007256 | activation of JNKK activity                           | 2/2279 | 11/18866 | 0.3906575 | 0.6413241 | 0.5802928 | 2 | TNIK/RIPK1   |
| Biological Process | GO:0007614 | short-term memory                                     | 2/2279 | 11/18866 | 0.3906575 | 0.6413241 | 0.5802928 | 2 | COMT/CUX2    |
| Biological Process | GO:0008611 | ether lipid biosynthetic process                      | 2/2279 | 11/18866 | 0.3906575 | 0.6413241 | 0.5802928 | 2 | CHPT1/PEDS1  |
| Biological Process | GO:0017085 | response to insecticide                               | 2/2279 | 11/18866 | 0.3906575 | 0.6413241 | 0.5802928 | 2 | DDC/FECH     |
| Biological Process | GO:0018401 | peptidyl-proline hydroxylation to 4-hydroxy-L-proline | 2/2279 | 11/18866 | 0.3906575 | 0.6413241 | 0.5802928 | 2 | P4HB/P4HA2   |
| Biological Process | GO:0019532 | oxalate transport                                     | 2/2279 | 11/18866 | 0.3906575 | 0.6413241 | 0.5802928 | 2 | SLC26A1/AGXT |
| Biological Process | GO:0021604 | cranial nerve structural organization                 | 2/2279 | 11/18866 | 0.3906575 | 0.6413241 | 0.5802928 | 2 | NRP2/PAX2    |
| Biological Process | GO:0030422 | production of siRNA involved in RNA interference      | 2/2279 | 11/18866 | 0.3906575 | 0.6413241 | 0.5802928 | 2 | AGO2/RMRP    |

|                    |            |                                                              |        |          |           |           |           |   |               |
|--------------------|------------|--------------------------------------------------------------|--------|----------|-----------|-----------|-----------|---|---------------|
| Biological Process | GO:0033539 | fatty acid beta-oxidation<br>using acyl-CoA<br>dehydrogenase | 2/2279 | 11/18866 | 0.3906575 | 0.6413241 | 0.5802928 | 2 | ACADM/ACADVL  |
| Biological Process | GO:0033860 | regulation of NAD(P)H<br>oxidase activity                    | 2/2279 | 11/18866 | 0.3906575 | 0.6413241 | 0.5802928 | 2 | GNAI2/AGTR1   |
| Biological Process | GO:0034378 | chylomicron assembly                                         | 2/2279 | 11/18866 | 0.3906575 | 0.6413241 | 0.5802928 | 2 | P4HB/PLAGL2   |
| Biological Process | GO:0035090 | maintenance of apical/basal<br>cell polarity                 | 2/2279 | 11/18866 | 0.3906575 | 0.6413241 | 0.5802928 | 2 | WNT11/WDR1    |
| Biological Process | GO:0035721 | intraciliary retrograde<br>transport                         | 2/2279 | 11/18866 | 0.3906575 | 0.6413241 | 0.5802928 | 2 | IFT140/TTC21B |
| Biological Process | GO:0035747 | natural killer cell chemotaxis                               | 2/2279 | 11/18866 | 0.3906575 | 0.6413241 | 0.5802928 | 2 | PIK3CD/CCL5   |
| Biological Process | GO:0042670 | retinal cone cell<br>differentiation                         | 2/2279 | 11/18866 | 0.3906575 | 0.6413241 | 0.5802928 | 2 | GNAT2/CABP4   |
| Biological Process | GO:0042758 | long-chain fatty acid<br>catabolic process                   | 2/2279 | 11/18866 | 0.3906575 | 0.6413241 | 0.5802928 | 2 | CYP4F3/ADTRP  |
| Biological Process | GO:0043471 | regulation of cellular<br>carbohydrate catabolic<br>process  | 2/2279 | 11/18866 | 0.3906575 | 0.6413241 | 0.5802928 | 2 | PGAM1/PPP1CB  |

|                    |            |                                                        |        |          |           |           |           |   |               |
|--------------------|------------|--------------------------------------------------------|--------|----------|-----------|-----------|-----------|---|---------------|
| Biological Process | GO:0045060 | negative thymic T cell selection                       | 2/2279 | 11/18866 | 0.3906575 | 0.6413241 | 0.5802928 | 2 | PTPRC/DOCK2   |
| Biological Process | GO:0045141 | meiotic telomere clustering                            | 2/2279 | 11/18866 | 0.3906575 | 0.6413241 | 0.5802928 | 2 | RAD21L1/TERB2 |
| Biological Process | GO:0045199 | maintenance of epithelial cell apical/basal polarity   | 2/2279 | 11/18866 | 0.3906575 | 0.6413241 | 0.5802928 | 2 | WNT11/WDR1    |
| Biological Process | GO:0046504 | glycerol ether biosynthetic process                    | 2/2279 | 11/18866 | 0.3906575 | 0.6413241 | 0.5802928 | 2 | CHPT1/PEDS1   |
| Biological Process | GO:0046549 | retinal cone cell development                          | 2/2279 | 11/18866 | 0.3906575 | 0.6413241 | 0.5802928 | 2 | GNAT2/CABP4   |
| Biological Process | GO:0046642 | negative regulation of alpha-beta T cell proliferation | 2/2279 | 11/18866 | 0.3906575 | 0.6413241 | 0.5802928 | 2 | ZBTB7B/VSIR   |
| Biological Process | GO:0046643 | regulation of gamma-delta T cell activation            | 2/2279 | 11/18866 | 0.3906575 | 0.6413241 | 0.5802928 | 2 | PTPRC/NOD2    |
| Biological Process | GO:0048680 | positive regulation of axon regeneration               | 2/2279 | 11/18866 | 0.3906575 | 0.6413241 | 0.5802928 | 2 | GRN/NDEL1     |
| Biological Process | GO:0048742 | regulation of skeletal muscle fiber development        | 2/2279 | 11/18866 | 0.3906575 | 0.6413241 | 0.5802928 | 2 | HDAC4/BCL2    |

|                    |            |                                                                             |        |          |           |           |           |   |                |
|--------------------|------------|-----------------------------------------------------------------------------|--------|----------|-----------|-----------|-----------|---|----------------|
| Biological Process | GO:0048853 | forebrain morphogenesis                                                     | 2/2279 | 11/18866 | 0.3906575 | 0.6413241 | 0.5802928 | 2 | NF1/SLIT1      |
| Biological Process | GO:0060159 | regulation of dopamine receptor signaling pathway                           | 2/2279 | 11/18866 | 0.3906575 | 0.6413241 | 0.5802928 | 2 | PALM/DTNBP1    |
| Biological Process | GO:0060281 | regulation of oocyte development                                            | 2/2279 | 11/18866 | 0.3906575 | 0.6413241 | 0.5802928 | 2 | PPP2R1A/NPPC   |
| Biological Process | GO:0060315 | negative regulation of ryanodine-sensitive calcium-release channel activity | 2/2279 | 11/18866 | 0.3906575 | 0.6413241 | 0.5802928 | 2 | CASQ2/GSTO1    |
| Biological Process | GO:0060379 | cardiac muscle cell myoblast differentiation                                | 2/2279 | 11/18866 | 0.3906575 | 0.6413241 | 0.5802928 | 2 | RBPJ/NOTCH1    |
| Biological Process | GO:0060525 | prostate glandular acinus development                                       | 2/2279 | 11/18866 | 0.3906575 | 0.6413241 | 0.5802928 | 2 | RXRA/NOTCH1    |
| Biological Process | GO:0060947 | cardiac vascular smooth muscle cell differentiation                         | 2/2279 | 11/18866 | 0.3906575 | 0.6413241 | 0.5802928 | 2 | MIR145/NOTCH1  |
| Biological Process | GO:0061299 | retina vasculature morphogenesis in camera-type eye                         | 2/2279 | 11/18866 | 0.3906575 | 0.6413241 | 0.5802928 | 2 | LRP5L/ARHGEF15 |
| Biological Process | GO:0061314 | Notch signaling involved in heart development                               | 2/2279 | 11/18866 | 0.3906575 | 0.6413241 | 0.5802928 | 2 | RBPJ/NOTCH1    |

|                    |            |                                                    |        |          |           |           |           |   |              |
|--------------------|------------|----------------------------------------------------|--------|----------|-----------|-----------|-----------|---|--------------|
| Biological Process | GO:0070213 | protein auto-ADP-ribosylation                      | 2/2279 | 11/18866 | 0.3906575 | 0.6413241 | 0.5802928 | 2 | TNKS/PARP10  |
| Biological Process | GO:0070933 | histone H4 deacetylation                           | 2/2279 | 11/18866 | 0.3906575 | 0.6413241 | 0.5802928 | 2 | HDAC4/HDAC1  |
| Biological Process | GO:0071609 | chemokine (C-C motif) ligand 5 production          | 2/2279 | 11/18866 | 0.3906575 | 0.6413241 | 0.5802928 | 2 | IL10/DEFB124 |
| Biological Process | GO:0071803 | positive regulation of podosome assembly           | 2/2279 | 11/18866 | 0.3906575 | 0.6413241 | 0.5802928 | 2 | TNF/ASAP1    |
| Biological Process | GO:0071838 | cell proliferation in bone marrow                  | 2/2279 | 11/18866 | 0.3906575 | 0.6413241 | 0.5802928 | 2 | MAP3K3/MEF2C |
| Biological Process | GO:0072697 | protein localization to cell cortex                | 2/2279 | 11/18866 | 0.3906575 | 0.6413241 | 0.5802928 | 2 | NUMA1/EZR    |
| Biological Process | GO:0086016 | AV node cell action potential                      | 2/2279 | 11/18866 | 0.3906575 | 0.6413241 | 0.5802928 | 2 | CACNA1C/GJA5 |
| Biological Process | GO:0086027 | AV node cell to bundle of His cell signaling       | 2/2279 | 11/18866 | 0.3906575 | 0.6413241 | 0.5802928 | 2 | CACNA1C/GJA5 |
| Biological Process | GO:0090030 | regulation of steroid hormone biosynthetic process | 2/2279 | 11/18866 | 0.3906575 | 0.6413241 | 0.5802928 | 2 | DGKQ/POR     |

|                    |            |                                                                                                  |        |          |           |           |           |   |              |
|--------------------|------------|--------------------------------------------------------------------------------------------------|--------|----------|-----------|-----------|-----------|---|--------------|
| Biological Process | GO:0090084 | negative regulation of inclusion body assembly                                                   | 2/2279 | 11/18866 | 0.3906575 | 0.6413241 | 0.5802928 | 2 | SORL1/DNAJB6 |
| Biological Process | GO:0090309 | positive regulation of DNA methylation-dependent heterochromatin assembly                        | 2/2279 | 11/18866 | 0.3906575 | 0.6413241 | 0.5802928 | 2 | ATF7IP/DNMT1 |
| Biological Process | GO:0090557 | establishment of endothelial intestinal barrier                                                  | 2/2279 | 11/18866 | 0.3906575 | 0.6413241 | 0.5802928 | 2 | TJP2/RAPGEF2 |
| Biological Process | GO:0097048 | dendritic cell apoptotic process                                                                 | 2/2279 | 11/18866 | 0.3906575 | 0.6413241 | 0.5802928 | 2 | RAPGEF2/BLK  |
| Biological Process | GO:0097384 | cellular lipid biosynthetic process                                                              | 2/2279 | 11/18866 | 0.3906575 | 0.6413241 | 0.5802928 | 2 | CHPT1/PEDS1  |
| Biological Process | GO:0098883 | synapse pruning                                                                                  | 2/2279 | 11/18866 | 0.3906575 | 0.6413241 | 0.5802928 | 2 | C1QB/CX3CR1  |
| Biological Process | GO:0106072 | negative regulation of adenylate cyclase-activating G protein-coupled receptor signaling pathway | 2/2279 | 11/18866 | 0.3906575 | 0.6413241 | 0.5802928 | 2 | GNAI2/MRAP   |
| Biological Process | GO:0150104 | transport across blood-brain barrier                                                             | 2/2279 | 11/18866 | 0.3906575 | 0.6413241 | 0.5802928 | 2 | MFSD2A/ABCC2 |
| Biological Process | GO:1900112 | regulation of histone H3-K9 trimethylation                                                       | 2/2279 | 11/18866 | 0.3906575 | 0.6413241 | 0.5802928 | 2 | KDM4C/PIH1D1 |

|                    |            |                                                                                 |        |          |           |           |           |   |               |
|--------------------|------------|---------------------------------------------------------------------------------|--------|----------|-----------|-----------|-----------|---|---------------|
| Biological Process | GO:1902093 | positive regulation of flagellated sperm motility                               | 2/2279 | 11/18866 | 0.3906575 | 0.6413241 | 0.5802928 | 2 | RNASE10/DEFB1 |
| Biological Process | GO:1902221 | erythrose 4-phosphate/phosphoenolpyruvate family amino acid metabolic process   | 2/2279 | 11/18866 | 0.3906575 | 0.6413241 | 0.5802928 | 2 | HGD/FAH       |
| Biological Process | GO:1902222 | erythrose 4-phosphate/phosphoenolpyruvate family amino acid catabolic process   | 2/2279 | 11/18866 | 0.3906575 | 0.6413241 | 0.5802928 | 2 | HGD/FAH       |
| Biological Process | GO:1903011 | negative regulation of bone development                                         | 2/2279 | 11/18866 | 0.3906575 | 0.6413241 | 0.5802928 | 2 | LTF/RFLNA     |
| Biological Process | GO:1903800 | positive regulation of production of miRNAs involved in gene silencing by miRNA | 2/2279 | 11/18866 | 0.3906575 | 0.6413241 | 0.5802928 | 2 | RIPK1/TGFB1   |
| Biological Process | GO:1904321 | response to forskolin                                                           | 2/2279 | 11/18866 | 0.3906575 | 0.6413241 | 0.5802928 | 2 | ADCY2/FDX1    |
| Biological Process | GO:1904322 | cellular response to forskolin                                                  | 2/2279 | 11/18866 | 0.3906575 | 0.6413241 | 0.5802928 | 2 | ADCY2/FDX1    |
| Biological Process | GO:1904396 | regulation of neuromuscular junction development                                | 2/2279 | 11/18866 | 0.3906575 | 0.6413241 | 0.5802928 | 2 | DCTN1/COLQ    |
| Biological Process | GO:1905383 | protein localization to presynapse                                              | 2/2279 | 11/18866 | 0.3906575 | 0.6413241 | 0.5802928 | 2 | KIF5C/MAP1A   |



|                    |            |                                                                                                     |         |           |           |           |           |    |                                                                                                                                                                                                                                                                                                    |                |
|--------------------|------------|-----------------------------------------------------------------------------------------------------|---------|-----------|-----------|-----------|-----------|----|----------------------------------------------------------------------------------------------------------------------------------------------------------------------------------------------------------------------------------------------------------------------------------------------------|----------------|
| Biological Process | GO:1905879 | regulation of oogenesis                                                                             | 2/2279  | 11/18866  | 0.3906575 | 0.6413241 | 0.5802928 | 2  |                                                                                                                                                                                                                                                                                                    | PPP2R1A/NPPC   |
| Biological Process | GO:2000049 | positive regulation of cell-cell adhesion mediated by cadherin                                      | 2/2279  | 11/18866  | 0.3906575 | 0.6413241 | 0.5802928 | 2  |                                                                                                                                                                                                                                                                                                    | PTPRU/FLOT1    |
| Biological Process | GO:2000155 | positive regulation of cilium-dependent cell motility                                               | 2/2279  | 11/18866  | 0.3906575 | 0.6413241 | 0.5802928 | 2  |                                                                                                                                                                                                                                                                                                    | RNASE10/DEFB1  |
| Biological Process | GO:2000480 | negative regulation of cAMP-dependent protein kinase activity                                       | 2/2279  | 11/18866  | 0.3906575 | 0.6413241 | 0.5802928 | 2  |                                                                                                                                                                                                                                                                                                    | PRKAG2/PRKAR1B |
| Biological Process | GO:2000551 | regulation of T-helper 2 cell cytokine production                                                   | 2/2279  | 11/18866  | 0.3906575 | 0.6413241 | 0.5802928 | 2  |                                                                                                                                                                                                                                                                                                    | PRKCZ/NLRP3    |
| Biological Process | GO:2000615 | regulation of histone H3-K9 acetylation                                                             | 2/2279  | 11/18866  | 0.3906575 | 0.6413241 | 0.5802928 | 2  |                                                                                                                                                                                                                                                                                                    | SPHK2/PIH1D1   |
| Biological Process | GO:2000668 | regulation of dendritic cell apoptotic process                                                      | 2/2279  | 11/18866  | 0.3906575 | 0.6413241 | 0.5802928 | 2  |                                                                                                                                                                                                                                                                                                    | RAPGEF2/BLK    |
| Biological Process | GO:2001269 | positive regulation of cysteine-type endopeptidase activity involved in apoptotic signaling pathway | 2/2279  | 11/18866  | 0.3906575 | 0.6413241 | 0.5802928 | 2  |                                                                                                                                                                                                                                                                                                    | GSN/SMAD3      |
| Biological Process | GO:0045787 | positive regulation of cell cycle                                                                   | 50/2279 | 396/18866 | 0.3909818 | 0.6413241 | 0.5802928 | 50 | RPTOR/BRD4/CALR/TGFA/IL10/TFDP1/BRCA2/SRPK2/PRKCA/NSMCE2/DYNC1H1/C6orf89/E2F7/CUL3/PCBP4/APP/ZNF385A/CDC16/ZBTB17/POC1A/FGFR1/CDC25A/ARID3A/OVOL1/TMOD3/SVIL/RARA/CSPP1/NUMA1/PDGFB/MEIS2/PLCB1/RB1/MED25/DUSP3/PRKCE/CDCA5/RHNO1/CHEK2/ANAPC7/PDGFRB/USP2/SPAG5/CDC14A/PLRG1/CCNY/CCNYL1/EIF4G1/P | CID2/SLF1      |

|                    |            |                                                                                            |        |          |           |           |           |   |                                  |
|--------------------|------------|--------------------------------------------------------------------------------------------|--------|----------|-----------|-----------|-----------|---|----------------------------------|
| Biological Process | GO:0000737 | DNA catabolic process, endonucleolytic                                                     | 5/2279 | 34/18866 | 0.3932171 | 0.6413241 | 0.5802928 | 5 | CECR2/PAM16/DFFB/DNASE1L3/FBH1   |
| Biological Process | GO:0002888 | positive regulation of myeloid leukocyte mediated immunity                                 | 5/2279 | 34/18866 | 0.3932171 | 0.6413241 | 0.5802928 | 5 | CD177/GAB2/FGR/SPHK2/ITGB2       |
| Biological Process | GO:0009156 | ribonucleoside monophosphate biosynthetic process                                          | 5/2279 | 34/18866 | 0.3932171 | 0.6413241 | 0.5802928 | 5 | AMPD3/UCK2/LHPP/DHODH/IMPDH1     |
| Biological Process | GO:0016242 | negative regulation of macroautophagy                                                      | 5/2279 | 34/18866 | 0.3932171 | 0.6413241 | 0.5802928 | 5 | USP36/FEZ2/CLEC16A/NPC1/TSC2     |
| Biological Process | GO:0019076 | viral release from host cell                                                               | 5/2279 | 34/18866 | 0.3932171 | 0.6413241 | 0.5802928 | 5 | TRIM27/TRIM8/PC/TRIM5/TRIM26     |
| Biological Process | GO:0032148 | activation of protein kinase B activity                                                    | 5/2279 | 34/18866 | 0.3932171 | 0.6413241 | 0.5802928 | 5 | PRKCZ/MIR143/ITGB1BP1/PRR5/PDGFB |
| Biological Process | GO:0033198 | response to ATP                                                                            | 5/2279 | 34/18866 | 0.3932171 | 0.6413241 | 0.5802928 | 5 | SSH1/SLC8A1/DGKQ/P2RX1/P2RX5     |
| Biological Process | GO:0035774 | positive regulation of insulin secretion involved in cellular response to glucose stimulus | 5/2279 | 34/18866 | 0.3932171 | 0.6413241 | 0.5802928 | 5 | NADK/ARRB1/GPLD1/GHRL/C2CD2L     |
| Biological Process | GO:0035890 | exit from host                                                                             | 5/2279 | 34/18866 | 0.3932171 | 0.6413241 | 0.5802928 | 5 | TRIM27/TRIM8/PC/TRIM5/TRIM26     |

|                    |            |                                                                 |         |           |           |           |           |    |                                                                                                                                                                                                                                         |
|--------------------|------------|-----------------------------------------------------------------|---------|-----------|-----------|-----------|-----------|----|-----------------------------------------------------------------------------------------------------------------------------------------------------------------------------------------------------------------------------------------|
| Biological Process | GO:0035891 | exit from host cell                                             | 5/2279  | 34/18866  | 0.3932171 | 0.6413241 | 0.5802928 | 5  | TRIM27/TRIM8/PC/TRIM5/TRIM26                                                                                                                                                                                                            |
| Biological Process | GO:0045648 | positive regulation of erythrocyte differentiation              | 5/2279  | 34/18866  | 0.3932171 | 0.6413241 | 0.5802928 | 5  | INPP5D/BRD1/ETS1/KAT7/INHBA                                                                                                                                                                                                             |
| Biological Process | GO:0061384 | heart trabecula morphogenesis                                   | 5/2279  | 34/18866  | 0.3932171 | 0.6413241 | 0.5802928 | 5  | CCM2L/RBPJ/ENG/NOTCH1/FHL2                                                                                                                                                                                                              |
| Biological Process | GO:0070102 | interleukin-6-mediated signaling pathway                        | 5/2279  | 34/18866  | 0.3932171 | 0.6413241 | 0.5802928 | 5  | GF11/RIPK1/JAK1/FER/IL6R                                                                                                                                                                                                                |
| Biological Process | GO:0099084 | postsynaptic specialization organization                        | 5/2279  | 34/18866  | 0.3932171 | 0.6413241 | 0.5802928 | 5  | ZMYND8/SYNGAP1/NRXN1/NRXN2/SHANK2                                                                                                                                                                                                       |
| Biological Process | GO:1902692 | regulation of neuroblast proliferation                          | 5/2279  | 34/18866  | 0.3932171 | 0.6413241 | 0.5802928 | 5  | DISC1/NF1/ZNF335/NOTCH1/CX3CR1                                                                                                                                                                                                          |
| Biological Process | GO:1904030 | negative regulation of cyclin-dependent protein kinase activity | 5/2279  | 34/18866  | 0.3932171 | 0.6413241 | 0.5802928 | 5  | TNFAIP3/FBXO7/LATS2/HHEX/HEXIM1                                                                                                                                                                                                         |
| Biological Process | GO:0045088 | regulation of innate immune response                            | 39/2279 | 307/18866 | 0.3936059 | 0.6413241 | 0.5802928 | 39 | NLRC4/AIM2/PPARG/CLEC4C/PIK3R6/FGR/TNFAIP3/CCL5/FPR2/MNDA/CD226/HLA-F/PTPN6/MUC12/JAK1/NCR1/FCN1/TRIM5/MUC20/NR1H2/TREML4/BCL10/PSMF1/GRN/NLRC5/CREBBP/ARRB2/IL18RAP/PSMB7/TYRO3/CADM1/CD96/RELA/FBXW11/HEXIM1/PARP9/FADD/PSMD13/STING1 |
| Biological Process | GO:0007601 | visual perception                                               | 28/2279 | 218/18866 | 0.3944045 | 0.6413241 | 0.5802928 | 28 | RCVRN/TACSTD2/PDE6A/CACNA2D4/OPA3/CRB1/TGFBI/CDH23/TULP2/CCDC66/GNAT2/PAX2/PITPNA/CDH3/RDH10/NOB1/MYO5A/CRYBB1/PDE6H/RPGRIP1/CABP1/EPAS1/GRK7/NRL/ABLIM1/EYS/KIFC3/CABP4                                                                |

|                    |            |                                                           |         |           |           |           |           |    |                                                                                                                                                                    |
|--------------------|------------|-----------------------------------------------------------|---------|-----------|-----------|-----------|-----------|----|--------------------------------------------------------------------------------------------------------------------------------------------------------------------|
| Biological Process | GO:1901605 | alpha-amino acid metabolic process                        | 26/2279 | 202/18866 | 0.3960165 | 0.6413241 | 0.5802928 | 26 | ACAD8/HAL/HGD/GGT1/CBS/ODC1/MSRA/COMT/MTHFS/OGDH/ALDH4A1/FAH/HIBADH/SLC7A7/AGXT/MTHFD1/ART4/HOGA1/MAT1A/HMGCL/GFPT2/CRYM/ADI1/ACAT1/HNMT/D<br>GLUCY                |
| Biological Process | GO:0009268 | response to pH                                            | 6/2279  | 42/18866  | 0.3975557 | 0.6413241 | 0.5802928 | 6  | GPLD1/GNA11/ARSB/INSRR/GPR4/SST                                                                                                                                    |
| Biological Process | GO:0044058 | regulation of digestive system process                    | 6/2279  | 42/18866  | 0.3975557 | 0.6413241 | 0.5802928 | 6  | SGK1/AQP1/NR1H2/GHRL/SLC22A5/KCNQ1                                                                                                                                 |
| Biological Process | GO:0051602 | response to electrical stimulus                           | 6/2279  | 42/18866  | 0.3975557 | 0.6413241 | 0.5802928 | 6  | DISC1/BRD1/GHRL/PALM/NTRK1/CYFIP1                                                                                                                                  |
| Biological Process | GO:0072595 | maintenance of protein localization in organelle          | 6/2279  | 42/18866  | 0.3975557 | 0.6413241 | 0.5802928 | 6  | HK1/SYNE1/HK2/MORC3/SP100/BCL3                                                                                                                                     |
| Biological Process | GO:0090278 | negative regulation of peptide hormone secretion          | 6/2279  | 42/18866  | 0.3975557 | 0.6413241 | 0.5802928 | 6  | CRHBP/ENY2/GHRL/KLF7/SREBF1/PRKN                                                                                                                                   |
| Biological Process | GO:0090279 | regulation of calcium ion import                          | 6/2279  | 42/18866  | 0.3975557 | 0.6413241 | 0.5802928 | 6  | TRIM27/SPHK2/PDGFB/PDGFRB/DYSF/TRPV2                                                                                                                               |
| Biological Process | GO:0098927 | vesicle-mediated transport between endosomal compartments | 6/2279  | 42/18866  | 0.3975557 | 0.6413241 | 0.5802928 | 6  | LMTK2/SORL1/SNX3/HOOK2/WDR81/EZR                                                                                                                                   |
| Biological Process | GO:0043488 | regulation of mRNA stability                              | 24/2279 | 186/18866 | 0.3975921 | 0.6413241 | 0.5802928 | 24 | EXOSC2/SLC11A1/PABPC4/TNPO1/PRKCA/LARP1/ZC3H12D/PCBP4/SAMD4A/CPEB3/IGF2BP3/PSMF1/FTO/YWHAZ/PSMB7/PAIP1/TNFSF13/SYNCRIP/EIF4G1/PSMD13/PCID2/TBRG4/T<br>ENT5C/TENT5A |

|                    |            |                                                            |         |           |           |           |           |    |                                                                                                                                     |
|--------------------|------------|------------------------------------------------------------|---------|-----------|-----------|-----------|-----------|----|-------------------------------------------------------------------------------------------------------------------------------------|
| Biological Process | GO:0006941 | striated muscle contraction                                | 23/2279 | 178/18866 | 0.3983604 | 0.6413241 | 0.5802928 | 23 | HDAC4/PDE4D/KCNE1/TTN/CASQ2/MAP2K6/CACNA1C/SLC8A1/GJA5/TNNT3/JUP/BIN1/JSRP1/NOS1AP/SMAD7/SCN1A/SNTA1/KCNQ1/GSTO1/ANK2/CASQ1/MB/GRK2 |
| Biological Process | GO:0019827 | stem cell population maintenance                           | 21/2279 | 162/18866 | 0.3998423 | 0.6413241 | 0.5802928 | 21 | FOXP1/TRIM8/LSM1/MIR145/WDR43/SKI/POLR2F/LBH/DLL1/RBPJ/PAX2/KDM4C/PRDM16/ESRRB/NOTCH1/ZHX2/DIS3L2/FOXO1/NODAL/LIF/ZNF706            |
| Biological Process | GO:0007528 | neuromuscular junction development                         | 7/2279  | 50/18866  | 0.4003043 | 0.6413241 | 0.5802928 | 7  | DCTN1/COLQ/APP/PPFIBP2/SHANK2/F2R/NEDD4                                                                                             |
| Biological Process | GO:0042987 | amyloid precursor protein catabolic process                | 7/2279  | 50/18866  | 0.4003043 | 0.6413241 | 0.5802928 | 7  | SORL1/TNF/ABCG1/BIN1/APP/CLU/RELA                                                                                                   |
| Biological Process | GO:0045104 | intermediate filament cytoskeleton organization            | 7/2279  | 50/18866  | 0.4003043 | 0.6413241 | 0.5802928 | 7  | KRT17/PKP1/NEFM/DNAJB6/GFAP/NDEL1/PPL                                                                                               |
| Biological Process | GO:0045981 | positive regulation of nucleotide metabolic process        | 7/2279  | 50/18866  | 0.4003043 | 0.6413241 | 0.5802928 | 7  | RCVRN/ENO1/PFKFB4/APP/ESRRB/PFKFB3/PRKAA1                                                                                           |
| Biological Process | GO:0048546 | digestive tract morphogenesis                              | 7/2279  | 50/18866  | 0.4003043 | 0.6413241 | 0.5802928 | 7  | SMAD3/EPHB3/WNT11/BCL2/NOTCH1/HLX/NODAL                                                                                             |
| Biological Process | GO:1900544 | positive regulation of purine nucleotide metabolic process | 7/2279  | 50/18866  | 0.4003043 | 0.6413241 | 0.5802928 | 7  | RCVRN/ENO1/PFKFB4/APP/ESRRB/PFKFB3/PRKAA1                                                                                           |
| Biological Process | GO:0055076 | transition metal ion homeostasis                           | 18/2279 | 138/18866 | 0.401858  | 0.6413241 | 0.5802928 | 18 | S100A8/SLC25A37/LCN2/LCK/SLC11A1/COX19/TTC7A/SLC11A2/APP/ATOX1/SLC39A13/EPAS1/LTF/EPB42/AP3D1/ATP7B/NCOA4/PRKN                      |

|                    |            |                                                        |        |          |           |           |           |   |                                                |
|--------------------|------------|--------------------------------------------------------|--------|----------|-----------|-----------|-----------|---|------------------------------------------------|
| Biological Process | GO:0000768 | syncytium formation by plasma membrane fusion          | 8/2279 | 58/18866 | 0.4020632 | 0.6413241 | 0.5802928 | 8 | EHD1/SBNO2/CD9/TANC1/NFATC2/MYH9/FLOT1/SCGB3A1 |
| Biological Process | GO:0140253 | cell-cell fusion                                       | 8/2279 | 58/18866 | 0.4020632 | 0.6413241 | 0.5802928 | 8 | EHD1/SBNO2/CD9/TANC1/NFATC2/MYH9/FLOT1/SCGB3A1 |
| Biological Process | GO:0000706 | meiotic DNA double-strand break processing             | 1/2279 | 4/18866  | 0.4025066 | 0.6413241 | 0.5802928 | 1 | SLX4                                           |
| Biological Process | GO:0000720 | pyrimidine dimer repair by nucleotide-excision repair  | 1/2279 | 4/18866  | 0.4025066 | 0.6413241 | 0.5802928 | 1 | ERCC1                                          |
| Biological Process | GO:0000821 | regulation of arginine metabolic process               | 1/2279 | 4/18866  | 0.4025066 | 0.6413241 | 0.5802928 | 1 | SLC7A7                                         |
| Biological Process | GO:0001806 | type IV hypersensitivity                               | 1/2279 | 4/18866  | 0.4025066 | 0.6413241 | 0.5802928 | 1 | FUT7                                           |
| Biological Process | GO:0002018 | renin-angiotensin regulation of aldosterone production | 1/2279 | 4/18866  | 0.4025066 | 0.6413241 | 0.5802928 | 1 | AGTR1                                          |
| Biological Process | GO:0002125 | maternal aggressive behavior                           | 1/2279 | 4/18866  | 0.4025066 | 0.6413241 | 0.5802928 | 1 | CRHBP                                          |
| Biological Process | GO:0002238 | response to molecule of fungal origin                  | 1/2279 | 4/18866  | 0.4025066 | 0.6413241 | 0.5802928 | 1 | SCIMP                                          |

|                    |            |                                                                 |        |         |           |           |           |   |         |
|--------------------|------------|-----------------------------------------------------------------|--------|---------|-----------|-----------|-----------|---|---------|
| Biological Process | GO:0002282 | microglial cell activation involved in immune response          | 1/2279 | 4/18866 | 0.4025066 | 0.6413241 | 0.5802928 | 1 | GRN     |
| Biological Process | GO:0002309 | T cell proliferation involved in immune response                | 1/2279 | 4/18866 | 0.4025066 | 0.6413241 | 0.5802928 | 1 | SLC11A1 |
| Biological Process | GO:0002325 | natural killer cell differentiation involved in immune response | 1/2279 | 4/18866 | 0.4025066 | 0.6413241 | 0.5802928 | 1 | PGLYRP1 |
| Biological Process | GO:0002399 | MHC class II protein complex assembly                           | 1/2279 | 4/18866 | 0.4025066 | 0.6413241 | 0.5802928 | 1 | HLA-DMB |
| Biological Process | GO:0002503 | peptide antigen assembly with MHC class II protein complex      | 1/2279 | 4/18866 | 0.4025066 | 0.6413241 | 0.5802928 | 1 | HLA-DMB |
| Biological Process | GO:0002678 | positive regulation of chronic inflammatory response            | 1/2279 | 4/18866 | 0.4025066 | 0.6413241 | 0.5802928 | 1 | TNF     |
| Biological Process | GO:0002901 | mature B cell apoptotic process                                 | 1/2279 | 4/18866 | 0.4025066 | 0.6413241 | 0.5802928 | 1 | BCL10   |
| Biological Process | GO:0002905 | regulation of mature B cell apoptotic process                   | 1/2279 | 4/18866 | 0.4025066 | 0.6413241 | 0.5802928 | 1 | BCL10   |
| Biological Process | GO:0002906 | negative regulation of mature B cell apoptotic process          | 1/2279 | 4/18866 | 0.4025066 | 0.6413241 | 0.5802928 | 1 | BCL10   |

|                    |            |                                                           |        |         |           |           |           |   |        |
|--------------------|------------|-----------------------------------------------------------|--------|---------|-----------|-----------|-----------|---|--------|
| Biological Process | GO:0002943 | tRNA dihydrouridine synthesis                             | 1/2279 | 4/18866 | 0.4025066 | 0.6413241 | 0.5802928 | 1 | DUS2   |
| Biological Process | GO:0003104 | positive regulation of glomerular filtration              | 1/2279 | 4/18866 | 0.4025066 | 0.6413241 | 0.5802928 | 1 | PDGFB  |
| Biological Process | GO:0003219 | cardiac right ventricle formation                         | 1/2279 | 4/18866 | 0.4025066 | 0.6413241 | 0.5802928 | 1 | NOTCH1 |
| Biological Process | GO:0003274 | endocardial cushion fusion                                | 1/2279 | 4/18866 | 0.4025066 | 0.6413241 | 0.5802928 | 1 | TGFBR2 |
| Biological Process | GO:0006121 | mitochondrial electron transport, succinate to ubiquinone | 1/2279 | 4/18866 | 0.4025066 | 0.6413241 | 0.5802928 | 1 | SDHD   |
| Biological Process | GO:0006145 | purine nucleobase catabolic process                       | 1/2279 | 4/18866 | 0.4025066 | 0.6413241 | 0.5802928 | 1 | AOX1   |
| Biological Process | GO:0006177 | GMP biosynthetic process                                  | 1/2279 | 4/18866 | 0.4025066 | 0.6413241 | 0.5802928 | 1 | IMPDH1 |
| Biological Process | GO:0006272 | leading strand elongation                                 | 1/2279 | 4/18866 | 0.4025066 | 0.6413241 | 0.5802928 | 1 | POLE   |
| Biological Process | GO:0006545 | glycine biosynthetic process                              | 1/2279 | 4/18866 | 0.4025066 | 0.6413241 | 0.5802928 | 1 | AGXT   |



|                    |            |                                              |        |         |           |           |           |   |         |
|--------------------|------------|----------------------------------------------|--------|---------|-----------|-----------|-----------|---|---------|
| Biological Process | GO:0006556 | S-adenosylmethionine biosynthetic process    | 1/2279 | 4/18866 | 0.4025066 | 0.6413241 | 0.5802928 | 1 | MAT1A   |
| Biological Process | GO:0006562 | proline catabolic process                    | 1/2279 | 4/18866 | 0.4025066 | 0.6413241 | 0.5802928 | 1 | ALDH4A1 |
| Biological Process | GO:0006565 | L-serine catabolic process                   | 1/2279 | 4/18866 | 0.4025066 | 0.6413241 | 0.5802928 | 1 | CBS     |
| Biological Process | GO:0006598 | polyamine catabolic process                  | 1/2279 | 4/18866 | 0.4025066 | 0.6413241 | 0.5802928 | 1 | SAT2    |
| Biological Process | GO:0006642 | triglyceride mobilization                    | 1/2279 | 4/18866 | 0.4025066 | 0.6413241 | 0.5802928 | 1 | LPIN1   |
| Biological Process | GO:0006659 | phosphatidylserine biosynthetic process      | 1/2279 | 4/18866 | 0.4025066 | 0.6413241 | 0.5802928 | 1 | PTDSS2  |
| Biological Process | GO:0006772 | thiamine metabolic process                   | 1/2279 | 4/18866 | 0.4025066 | 0.6413241 | 0.5802928 | 1 | ACP3    |
| Biological Process | GO:0007227 | signal transduction downstream of smoothened | 1/2279 | 4/18866 | 0.4025066 | 0.6413241 | 0.5802928 | 1 | STK36   |
| Biological Process | GO:0007621 | negative regulation of female receptivity    | 1/2279 | 4/18866 | 0.4025066 | 0.6413241 | 0.5802928 | 1 | PPP1R1B |

|                    |            |                                                   |        |         |           |           |           |   |        |
|--------------------|------------|---------------------------------------------------|--------|---------|-----------|-----------|-----------|---|--------|
| Biological Process | GO:0008592 | regulation of Toll signaling pathway              | 1/2279 | 4/18866 | 0.4025066 | 0.6413241 | 0.5802928 | 1 | PELI1  |
| Biological Process | GO:0009073 | aromatic amino acid family biosynthetic process   | 1/2279 | 4/18866 | 0.4025066 | 0.6413241 | 0.5802928 | 1 | MTHFD1 |
| Biological Process | GO:0009128 | purine nucleoside monophosphate catabolic process | 1/2279 | 4/18866 | 0.4025066 | 0.6413241 | 0.5802928 | 1 | AMPD3  |
| Biological Process | GO:0009298 | GDP-mannose biosynthetic process                  | 1/2279 | 4/18866 | 0.4025066 | 0.6413241 | 0.5802928 | 1 | PMM2   |
| Biological Process | GO:0010025 | wax biosynthetic process                          | 1/2279 | 4/18866 | 0.4025066 | 0.6413241 | 0.5802928 | 1 | FAR2   |
| Biological Process | GO:0010046 | response to mycotoxin                             | 1/2279 | 4/18866 | 0.4025066 | 0.6413241 | 0.5802928 | 1 | LCN2   |
| Biological Process | GO:0010166 | wax metabolic process                             | 1/2279 | 4/18866 | 0.4025066 | 0.6413241 | 0.5802928 | 1 | FAR2   |
| Biological Process | GO:0010193 | response to ozone                                 | 1/2279 | 4/18866 | 0.4025066 | 0.6413241 | 0.5802928 | 1 | CAT    |
| Biological Process | GO:0010636 | positive regulation of mitochondrial fusion       | 1/2279 | 4/18866 | 0.4025066 | 0.6413241 | 0.5802928 | 1 | PRKN   |

|                    |            |                                                                            |        |         |           |           |           |   |         |
|--------------------|------------|----------------------------------------------------------------------------|--------|---------|-----------|-----------|-----------|---|---------|
| Biological Process | GO:0010710 | regulation of collagen catabolic process                                   | 1/2279 | 4/18866 | 0.4025066 | 0.6413241 | 0.5802928 | 1 | VSIR    |
| Biological Process | GO:0010724 | regulation of definitive erythrocyte differentiation                       | 1/2279 | 4/18866 | 0.4025066 | 0.6413241 | 0.5802928 | 1 | ZFPM1   |
| Biological Process | GO:0010748 | negative regulation of long-chain fatty acid import across plasma membrane | 1/2279 | 4/18866 | 0.4025066 | 0.6413241 | 0.5802928 | 1 | THBS1   |
| Biological Process | GO:0014038 | regulation of Schwann cell differentiation                                 | 1/2279 | 4/18866 | 0.4025066 | 0.6413241 | 0.5802928 | 1 | RELA    |
| Biological Process | GO:0015766 | disaccharide transport                                                     | 1/2279 | 4/18866 | 0.4025066 | 0.6413241 | 0.5802928 | 1 | SLC45A4 |
| Biological Process | GO:0015770 | sucrose transport                                                          | 1/2279 | 4/18866 | 0.4025066 | 0.6413241 | 0.5802928 | 1 | SLC45A4 |
| Biological Process | GO:0015772 | oligosaccharide transport                                                  | 1/2279 | 4/18866 | 0.4025066 | 0.6413241 | 0.5802928 | 1 | SLC45A4 |
| Biological Process | GO:0015842 | aminergic neurotransmitter loading into synaptic vesicle                   | 1/2279 | 4/18866 | 0.4025066 | 0.6413241 | 0.5802928 | 1 | DDC     |
| Biological Process | GO:0015860 | purine nucleoside transmembrane transport                                  | 1/2279 | 4/18866 | 0.4025066 | 0.6413241 | 0.5802928 | 1 | SLC29A1 |

|                    |            |                                        |        |         |           |           |           |   |         |
|--------------------|------------|----------------------------------------|--------|---------|-----------|-----------|-----------|---|---------|
| Biological Process | GO:0015870 | acetylcholine transport                | 1/2279 | 4/18866 | 0.4025066 | 0.6413241 | 0.5802928 | 1 | SLC44A4 |
| Biological Process | GO:0015917 | aminophospholipid transport            | 1/2279 | 4/18866 | 0.4025066 | 0.6413241 | 0.5802928 | 1 | TMEM30A |
| Biological Process | GO:0016076 | snRNA catabolic process                | 1/2279 | 4/18866 | 0.4025066 | 0.6413241 | 0.5802928 | 1 | ZCCHC8  |
| Biological Process | GO:0016240 | autophagosome membrane docking         | 1/2279 | 4/18866 | 0.4025066 | 0.6413241 | 0.5802928 | 1 | ATG14   |
| Biological Process | GO:0018076 | N-terminal peptidyl-lysine acetylation | 1/2279 | 4/18866 | 0.4025066 | 0.6413241 | 0.5802928 | 1 | CREBBP  |
| Biological Process | GO:0018197 | peptidyl-aspartic acid modification    | 1/2279 | 4/18866 | 0.4025066 | 0.6413241 | 0.5802928 | 1 | ASPH    |
| Biological Process | GO:0018201 | peptidyl-glycine modification          | 1/2279 | 4/18866 | 0.4025066 | 0.6413241 | 0.5802928 | 1 | NTMT1   |
| Biological Process | GO:0018335 | protein succinylation                  | 1/2279 | 4/18866 | 0.4025066 | 0.6413241 | 0.5802928 | 1 | OGDH    |
| Biological Process | GO:0019086 | late viral transcription               | 1/2279 | 4/18866 | 0.4025066 | 0.6413241 | 0.5802928 | 1 | USF2    |

|                    |            |                                                        |        |         |           |           |           |   |       |
|--------------------|------------|--------------------------------------------------------|--------|---------|-----------|-----------|-----------|---|-------|
| Biological Process | GO:0019376 | galactolipid catabolic process                         | 1/2279 | 4/18866 | 0.4025066 | 0.6413241 | 0.5802928 | 1 | GALC  |
| Biological Process | GO:0019556 | histidine catabolic process to glutamate and formamide | 1/2279 | 4/18866 | 0.4025066 | 0.6413241 | 0.5802928 | 1 | HAL   |
| Biological Process | GO:0019557 | histidine catabolic process to glutamate and formate   | 1/2279 | 4/18866 | 0.4025066 | 0.6413241 | 0.5802928 | 1 | HAL   |
| Biological Process | GO:0019740 | nitrogen utilization                                   | 1/2279 | 4/18866 | 0.4025066 | 0.6413241 | 0.5802928 | 1 | BCL2  |
| Biological Process | GO:0019747 | regulation of isoprenoid metabolic process             | 1/2279 | 4/18866 | 0.4025066 | 0.6413241 | 0.5802928 | 1 | RDH10 |
| Biological Process | GO:0021555 | midbrain-hindbrain boundary morphogenesis              | 1/2279 | 4/18866 | 0.4025066 | 0.6413241 | 0.5802928 | 1 | HES3  |
| Biological Process | GO:0021769 | orbitofrontal cortex development                       | 1/2279 | 4/18866 | 0.4025066 | 0.6413241 | 0.5802928 | 1 | FGFR1 |
| Biological Process | GO:0021773 | striatal medium spiny neuron differentiation           | 1/2279 | 4/18866 | 0.4025066 | 0.6413241 | 0.5802928 | 1 | INHBA |
| Biological Process | GO:0021855 | hypothalamus cell migration                            | 1/2279 | 4/18866 | 0.4025066 | 0.6413241 | 0.5802928 | 1 | NRP2  |

|                    |            |                                                                              |        |         |           |           |           |   |       |
|--------------------|------------|------------------------------------------------------------------------------|--------|---------|-----------|-----------|-----------|---|-------|
| Biological Process | GO:0021886 | hypothalamus<br>gonadotrophin-releasing<br>hormone neuron<br>differentiation | 1/2279 | 4/18866 | 0.4025066 | 0.6413241 | 0.5802928 | 1 | NRP2  |
| Biological Process | GO:0021888 | hypothalamus<br>gonadotrophin-releasing<br>hormone neuron<br>development     | 1/2279 | 4/18866 | 0.4025066 | 0.6413241 | 0.5802928 | 1 | NRP2  |
| Biological Process | GO:0022009 | central nervous system<br>vasculogenesis                                     | 1/2279 | 4/18866 | 0.4025066 | 0.6413241 | 0.5802928 | 1 | ENG   |
| Biological Process | GO:0022615 | protein to membrane<br>docking                                               | 1/2279 | 4/18866 | 0.4025066 | 0.6413241 | 0.5802928 | 1 | SNX3  |
| Biological Process | GO:0030035 | microspike assembly                                                          | 1/2279 | 4/18866 | 0.4025066 | 0.6413241 | 0.5802928 | 1 | MTSS1 |
| Biological Process | GO:0030043 | actin filament fragmentation                                                 | 1/2279 | 4/18866 | 0.4025066 | 0.6413241 | 0.5802928 | 1 | WDR1  |
| Biological Process | GO:0031048 | heterochromatin assembly<br>by small RNA                                     | 1/2279 | 4/18866 | 0.4025066 | 0.6413241 | 0.5802928 | 1 | ZNFX1 |
| Biological Process | GO:0031291 | Ran protein signal<br>transduction                                           | 1/2279 | 4/18866 | 0.4025066 | 0.6413241 | 0.5802928 | 1 | RCC1  |
| Biological Process | GO:0031444 | slow-twitch skeletal muscle<br>fiber contraction                             | 1/2279 | 4/18866 | 0.4025066 | 0.6413241 | 0.5802928 | 1 | MB    |

|                    |            |                                                                               |        |         |           |           |           |   |         |
|--------------------|------------|-------------------------------------------------------------------------------|--------|---------|-----------|-----------|-----------|---|---------|
| Biological Process | GO:0031536 | positive regulation of exit from mitosis                                      | 1/2279 | 4/18866 | 0.4025066 | 0.6413241 | 0.5802928 | 1 | CDCA5   |
| Biological Process | GO:0031554 | regulation of DNA-templated transcription, termination                        | 1/2279 | 4/18866 | 0.4025066 | 0.6413241 | 0.5802928 | 1 | SCAF8   |
| Biological Process | GO:0032264 | IMP salvage                                                                   | 1/2279 | 4/18866 | 0.4025066 | 0.6413241 | 0.5802928 | 1 | AMPD3   |
| Biological Process | GO:0032289 | central nervous system myelin formation                                       | 1/2279 | 4/18866 | 0.4025066 | 0.6413241 | 0.5802928 | 1 | ERCC2   |
| Biological Process | GO:0032455 | nerve growth factor processing                                                | 1/2279 | 4/18866 | 0.4025066 | 0.6413241 | 0.5802928 | 1 | PCSK6   |
| Biological Process | GO:0032487 | regulation of Rap protein signal transduction                                 | 1/2279 | 4/18866 | 0.4025066 | 0.6413241 | 0.5802928 | 1 | TIMP2   |
| Biological Process | GO:0032826 | regulation of natural killer cell differentiation involved in immune response | 1/2279 | 4/18866 | 0.4025066 | 0.6413241 | 0.5802928 | 1 | PGLYRP1 |
| Biological Process | GO:0032875 | regulation of DNA endoreduplication                                           | 1/2279 | 4/18866 | 0.4025066 | 0.6413241 | 0.5802928 | 1 | E2F7    |
| Biological Process | GO:0032898 | neurotrophin production                                                       | 1/2279 | 4/18866 | 0.4025066 | 0.6413241 | 0.5802928 | 1 | PCSK6   |

|                    |            |                                                                    |        |         |           |           |           |   |          |
|--------------------|------------|--------------------------------------------------------------------|--------|---------|-----------|-----------|-----------|---|----------|
| Biological Process | GO:0033031 | positive regulation of neutrophil apoptotic process                | 1/2279 | 4/18866 | 0.4025066 | 0.6413241 | 0.5802928 | 1 | PIK3CD   |
| Biological Process | GO:0033088 | negative regulation of immature T cell proliferation in thymus     | 1/2279 | 4/18866 | 0.4025066 | 0.6413241 | 0.5802928 | 1 | TMEM131L |
| Biological Process | GO:0033326 | cerebrospinal fluid secretion                                      | 1/2279 | 4/18866 | 0.4025066 | 0.6413241 | 0.5802928 | 1 | AQP1     |
| Biological Process | GO:0033590 | response to cobalamin                                              | 1/2279 | 4/18866 | 0.4025066 | 0.6413241 | 0.5802928 | 1 | RELA     |
| Biological Process | GO:0033600 | negative regulation of mammary gland epithelial cell proliferation | 1/2279 | 4/18866 | 0.4025066 | 0.6413241 | 0.5802928 | 1 | BRCA2    |
| Biological Process | GO:0033668 | negative regulation by symbiont of host apoptotic process          | 1/2279 | 4/18866 | 0.4025066 | 0.6413241 | 0.5802928 | 1 | BCL2L1   |
| Biological Process | GO:0034157 | positive regulation of toll-like receptor 7 signaling pathway      | 1/2279 | 4/18866 | 0.4025066 | 0.6413241 | 0.5802928 | 1 | TREML4   |
| Biological Process | GO:0034164 | negative regulation of toll-like receptor 9 signaling pathway      | 1/2279 | 4/18866 | 0.4025066 | 0.6413241 | 0.5802928 | 1 | GRAMD4   |
| Biological Process | GO:0034165 | positive regulation of toll-like receptor 9 signaling pathway      | 1/2279 | 4/18866 | 0.4025066 | 0.6413241 | 0.5802928 | 1 | RTN4     |



|                    |            |                                                               |        |         |           |           |           |   |         |
|--------------------|------------|---------------------------------------------------------------|--------|---------|-----------|-----------|-----------|---|---------|
| Biological Process | GO:0034775 | glutathione transmembrane transport                           | 1/2279 | 4/18866 | 0.4025066 | 0.6413241 | 0.5802928 | 1 | ABCC1   |
| Biological Process | GO:0035021 | negative regulation of Rac protein signal transduction        | 1/2279 | 4/18866 | 0.4025066 | 0.6413241 | 0.5802928 | 1 | NF1     |
| Biological Process | GO:0035063 | nuclear speck organization                                    | 1/2279 | 4/18866 | 0.4025066 | 0.6413241 | 0.5802928 | 1 | SRPK2   |
| Biological Process | GO:0035087 | siRNA loading onto RISC involved in RNA interference          | 1/2279 | 4/18866 | 0.4025066 | 0.6413241 | 0.5802928 | 1 | AGO2    |
| Biological Process | GO:0035290 | trunk segmentation                                            | 1/2279 | 4/18866 | 0.4025066 | 0.6413241 | 0.5802928 | 1 | NRP2    |
| Biological Process | GO:0035583 | sequestering of TGFbeta in extracellular matrix               | 1/2279 | 4/18866 | 0.4025066 | 0.6413241 | 0.5802928 | 1 | LTBP1   |
| Biological Process | GO:0035585 | calcium-mediated signaling using extracellular calcium source | 1/2279 | 4/18866 | 0.4025066 | 0.6413241 | 0.5802928 | 1 | CACNA1C |
| Biological Process | GO:0035616 | histone H2B conserved C-terminal lysine deubiquitination      | 1/2279 | 4/18866 | 0.4025066 | 0.6413241 | 0.5802928 | 1 | USP49   |
| Biological Process | GO:0035621 | ER to Golgi ceramide transport                                | 1/2279 | 4/18866 | 0.4025066 | 0.6413241 | 0.5802928 | 1 | SGPP1   |

|                    |            |                                               |        |         |           |           |           |   |        |
|--------------------|------------|-----------------------------------------------|--------|---------|-----------|-----------|-----------|---|--------|
| Biological Process | GO:0035709 | memory T cell activation                      | 1/2279 | 4/18866 | 0.4025066 | 0.6413241 | 0.5802928 | 1 | CYRIB  |
| Biological Process | GO:0035814 | negative regulation of renal sodium excretion | 1/2279 | 4/18866 | 0.4025066 | 0.6413241 | 0.5802928 | 1 | COMT   |
| Biological Process | GO:0035822 | gene conversion                               | 1/2279 | 4/18866 | 0.4025066 | 0.6413241 | 0.5802928 | 1 | RNF212 |
| Biological Process | GO:0035844 | cloaca development                            | 1/2279 | 4/18866 | 0.4025066 | 0.6413241 | 0.5802928 | 1 | WNT11  |
| Biological Process | GO:0035915 | pore formation in membrane of other organism  | 1/2279 | 4/18866 | 0.4025066 | 0.6413241 | 0.5802928 | 1 | MPEG1  |
| Biological Process | GO:0035995 | detection of muscle stretch                   | 1/2279 | 4/18866 | 0.4025066 | 0.6413241 | 0.5802928 | 1 | TTN    |
| Biological Process | GO:0036438 | maintenance of lens transparency              | 1/2279 | 4/18866 | 0.4025066 | 0.6413241 | 0.5802928 | 1 | GCNT2  |
| Biological Process | GO:0036484 | trunk neural crest cell migration             | 1/2279 | 4/18866 | 0.4025066 | 0.6413241 | 0.5802928 | 1 | NRP2   |
| Biological Process | GO:0036486 | ventral trunk neural crest cell migration     | 1/2279 | 4/18866 | 0.4025066 | 0.6413241 | 0.5802928 | 1 | NRP2   |

|                    |            |                                                                      |        |         |           |           |           |   |        |
|--------------------|------------|----------------------------------------------------------------------|--------|---------|-----------|-----------|-----------|---|--------|
| Biological Process | GO:0038028 | insulin receptor signaling pathway via phosphatidylinositol 3-kinase | 1/2279 | 4/18866 | 0.4025066 | 0.6413241 | 0.5802928 | 1 | FER    |
| Biological Process | GO:0038123 | toll-like receptor TLR1:TLR2 signaling pathway                       | 1/2279 | 4/18866 | 0.4025066 | 0.6413241 | 0.5802928 | 1 | SCIMP  |
| Biological Process | GO:0038156 | interleukin-3-mediated signaling pathway                             | 1/2279 | 4/18866 | 0.4025066 | 0.6413241 | 0.5802928 | 1 | CSF2RB |
| Biological Process | GO:0039526 | modulation by virus of host apoptotic process                        | 1/2279 | 4/18866 | 0.4025066 | 0.6413241 | 0.5802928 | 1 | BCL2L1 |
| Biological Process | GO:0042078 | germ-line stem cell division                                         | 1/2279 | 4/18866 | 0.4025066 | 0.6413241 | 0.5802928 | 1 | ZBTB16 |
| Biological Process | GO:0042320 | regulation of circadian sleep/wake cycle, REM sleep                  | 1/2279 | 4/18866 | 0.4025066 | 0.6413241 | 0.5802928 | 1 | GHRL   |
| Biological Process | GO:0042360 | vitamin E metabolic process                                          | 1/2279 | 4/18866 | 0.4025066 | 0.6413241 | 0.5802928 | 1 | PLTP   |
| Biological Process | GO:0042361 | menaquinone catabolic process                                        | 1/2279 | 4/18866 | 0.4025066 | 0.6413241 | 0.5802928 | 1 | CYP4F3 |
| Biological Process | GO:0042377 | vitamin K catabolic process                                          | 1/2279 | 4/18866 | 0.4025066 | 0.6413241 | 0.5802928 | 1 | CYP4F3 |

|                    |            |                                                             |        |         |           |           |           |   |         |
|--------------------|------------|-------------------------------------------------------------|--------|---------|-----------|-----------|-----------|---|---------|
| Biological Process | GO:0042637 | catagen                                                     | 1/2279 | 4/18866 | 0.4025066 | 0.6413241 | 0.5802928 | 1 | CDH3    |
| Biological Process | GO:0042701 | progesterone secretion                                      | 1/2279 | 4/18866 | 0.4025066 | 0.6413241 | 0.5802928 | 1 | INHBA   |
| Biological Process | GO:0042851 | L-alanine metabolic process                                 | 1/2279 | 4/18866 | 0.4025066 | 0.6413241 | 0.5802928 | 1 | AGXT    |
| Biological Process | GO:0042853 | L-alanine catabolic process                                 | 1/2279 | 4/18866 | 0.4025066 | 0.6413241 | 0.5802928 | 1 | AGXT    |
| Biological Process | GO:0043606 | formamide metabolic process                                 | 1/2279 | 4/18866 | 0.4025066 | 0.6413241 | 0.5802928 | 1 | HAL     |
| Biological Process | GO:0043622 | cortical microtubule organization                           | 1/2279 | 4/18866 | 0.4025066 | 0.6413241 | 0.5802928 | 1 | EZR     |
| Biological Process | GO:0044789 | modulation by host of viral release from host cell          | 1/2279 | 4/18866 | 0.4025066 | 0.6413241 | 0.5802928 | 1 | PC      |
| Biological Process | GO:0044791 | positive regulation by host of viral release from host cell | 1/2279 | 4/18866 | 0.4025066 | 0.6413241 | 0.5802928 | 1 | PC      |
| Biological Process | GO:0044878 | mitotic cytokinesis checkpoint                              | 1/2279 | 4/18866 | 0.4025066 | 0.6413241 | 0.5802928 | 1 | ZFYVE19 |

|                    |            |                                                                  |        |         |           |           |           |   |            |
|--------------------|------------|------------------------------------------------------------------|--------|---------|-----------|-----------|-----------|---|------------|
| Biological Process | GO:0045337 | farnesyl diphosphate biosynthetic process                        | 1/2279 | 4/18866 | 0.4025066 | 0.6413241 | 0.5802928 | 1 | HMGCS1     |
| Biological Process | GO:0045575 | basophil activation                                              | 1/2279 | 4/18866 | 0.4025066 | 0.6413241 | 0.5802928 | 1 | PI4K2A     |
| Biological Process | GO:0045629 | negative regulation of T-helper 2 cell differentiation           | 1/2279 | 4/18866 | 0.4025066 | 0.6413241 | 0.5802928 | 1 | HLX        |
| Biological Process | GO:0046010 | positive regulation of circadian sleep/wake cycle, non-REM sleep | 1/2279 | 4/18866 | 0.4025066 | 0.6413241 | 0.5802928 | 1 | GHRL       |
| Biological Process | GO:0046016 | positive regulation of transcription by glucose                  | 1/2279 | 4/18866 | 0.4025066 | 0.6413241 | 0.5802928 | 1 | USF2       |
| Biological Process | GO:0046102 | inosine metabolic process                                        | 1/2279 | 4/18866 | 0.4025066 | 0.6413241 | 0.5802928 | 1 | PNP        |
| Biological Process | GO:0046398 | UDP-glucuronate metabolic process                                | 1/2279 | 4/18866 | 0.4025066 | 0.6413241 | 0.5802928 | 1 | CSGALNACT1 |
| Biological Process | GO:0046684 | response to pyrethroid                                           | 1/2279 | 4/18866 | 0.4025066 | 0.6413241 | 0.5802928 | 1 | DDC        |
| Biological Process | GO:0046898 | response to cycloheximide                                        | 1/2279 | 4/18866 | 0.4025066 | 0.6413241 | 0.5802928 | 1 | BCL2L1     |

|                    |            |                                                          |        |         |           |           |           |   |         |
|--------------------|------------|----------------------------------------------------------|--------|---------|-----------|-----------|-----------|---|---------|
| Biological Process | GO:0046967 | cytosol to endoplasmic reticulum transport               | 1/2279 | 4/18866 | 0.4025066 | 0.6413241 | 0.5802928 | 1 | ATP2A3  |
| Biological Process | GO:0048014 | Tie signaling pathway                                    | 1/2279 | 4/18866 | 0.4025066 | 0.6413241 | 0.5802928 | 1 | ANGPT1  |
| Biological Process | GO:0048022 | negative regulation of melanin biosynthetic process      | 1/2279 | 4/18866 | 0.4025066 | 0.6413241 | 0.5802928 | 1 | RAPGEF2 |
| Biological Process | GO:0048104 | establishment of body hair or bristle planar orientation | 1/2279 | 4/18866 | 0.4025066 | 0.6413241 | 0.5802928 | 1 | ASTN2   |
| Biological Process | GO:0048105 | establishment of body hair planar orientation            | 1/2279 | 4/18866 | 0.4025066 | 0.6413241 | 0.5802928 | 1 | ASTN2   |
| Biological Process | GO:0048133 | male germ-line stem cell asymmetric division             | 1/2279 | 4/18866 | 0.4025066 | 0.6413241 | 0.5802928 | 1 | ZBTB16  |
| Biological Process | GO:0048369 | lateral mesoderm morphogenesis                           | 1/2279 | 4/18866 | 0.4025066 | 0.6413241 | 0.5802928 | 1 | FGFR1   |
| Biological Process | GO:0048370 | lateral mesoderm formation                               | 1/2279 | 4/18866 | 0.4025066 | 0.6413241 | 0.5802928 | 1 | FGFR1   |
| Biological Process | GO:0048499 | synaptic vesicle membrane organization                   | 1/2279 | 4/18866 | 0.4025066 | 0.6413241 | 0.5802928 | 1 | AP3D1   |

|                    |            |                                                               |        |         |           |           |           |   |        |
|--------------------|------------|---------------------------------------------------------------|--------|---------|-----------|-----------|-----------|---|--------|
| Biological Process | GO:0051030 | snRNA transport                                               | 1/2279 | 4/18866 | 0.4025066 | 0.6413241 | 0.5802928 | 1 | SNUPN  |
| Biological Process | GO:0051464 | positive regulation of cortisol secretion                     | 1/2279 | 4/18866 | 0.4025066 | 0.6413241 | 0.5802928 | 1 | GHRL   |
| Biological Process | GO:0051611 | regulation of serotonin uptake                                | 1/2279 | 4/18866 | 0.4025066 | 0.6413241 | 0.5802928 | 1 | ITGB3  |
| Biological Process | GO:0051794 | regulation of timing of catagen                               | 1/2279 | 4/18866 | 0.4025066 | 0.6413241 | 0.5802928 | 1 | CDH3   |
| Biological Process | GO:0051919 | positive regulation of fibrinolysis                           | 1/2279 | 4/18866 | 0.4025066 | 0.6413241 | 0.5802928 | 1 | F12    |
| Biological Process | GO:0051933 | amino acid neurotransmitter reuptake                          | 1/2279 | 4/18866 | 0.4025066 | 0.6413241 | 0.5802928 | 1 | PER2   |
| Biological Process | GO:0051935 | glutamate reuptake                                            | 1/2279 | 4/18866 | 0.4025066 | 0.6413241 | 0.5802928 | 1 | PER2   |
| Biological Process | GO:0052041 | negative regulation by symbiont of host programmed cell death | 1/2279 | 4/18866 | 0.4025066 | 0.6413241 | 0.5802928 | 1 | BCL2L1 |
| Biological Process | GO:0060005 | vestibular reflex                                             | 1/2279 | 4/18866 | 0.4025066 | 0.6413241 | 0.5802928 | 1 | TMC1   |

|                    |            |                                                            |        |         |           |           |           |   |       |
|--------------------|------------|------------------------------------------------------------|--------|---------|-----------|-----------|-----------|---|-------|
| Biological Process | GO:0060160 | negative regulation of dopamine receptor signaling pathway | 1/2279 | 4/18866 | 0.4025066 | 0.6413241 | 0.5802928 | 1 | PALM  |
| Biological Process | GO:0060164 | regulation of timing of neuron differentiation             | 1/2279 | 4/18866 | 0.4025066 | 0.6413241 | 0.5802928 | 1 | HES3  |
| Biological Process | GO:0060167 | regulation of adenosine receptor signaling pathway         | 1/2279 | 4/18866 | 0.4025066 | 0.6413241 | 0.5802928 | 1 | ACP3  |
| Biological Process | GO:0060235 | lens induction in camera-type eye                          | 1/2279 | 4/18866 | 0.4025066 | 0.6413241 | 0.5802928 | 1 | HIPK2 |
| Biological Process | GO:0060283 | negative regulation of oocyte development                  | 1/2279 | 4/18866 | 0.4025066 | 0.6413241 | 0.5802928 | 1 | NPPC  |
| Biological Process | GO:0060300 | regulation of cytokine activity                            | 1/2279 | 4/18866 | 0.4025066 | 0.6413241 | 0.5802928 | 1 | IL10  |
| Biological Process | GO:0060319 | primitive erythrocyte differentiation                      | 1/2279 | 4/18866 | 0.4025066 | 0.6413241 | 0.5802928 | 1 | ZFPM1 |
| Biological Process | GO:0060431 | primary lung bud formation                                 | 1/2279 | 4/18866 | 0.4025066 | 0.6413241 | 0.5802928 | 1 | RDH10 |
| Biological Process | GO:0060486 | club cell differentiation                                  | 1/2279 | 4/18866 | 0.4025066 | 0.6413241 | 0.5802928 | 1 | RBPJ  |



|                    |            |                                                                                                      |        |         |           |           |           |   |       |
|--------------------|------------|------------------------------------------------------------------------------------------------------|--------|---------|-----------|-----------|-----------|---|-------|
| Biological Process | GO:0060584 | regulation of prostaglandin-endoperoxide synthase activity                                           | 1/2279 | 4/18866 | 0.4025066 | 0.6413241 | 0.5802928 | 1 | NOD2  |
| Biological Process | GO:0060585 | positive regulation of prostaglandin-endoperoxide synthase activity                                  | 1/2279 | 4/18866 | 0.4025066 | 0.6413241 | 0.5802928 | 1 | NOD2  |
| Biological Process | GO:0060665 | regulation of branching involved in salivary gland morphogenesis by mesenchymal-epithelial signaling | 1/2279 | 4/18866 | 0.4025066 | 0.6413241 | 0.5802928 | 1 | FGFR1 |
| Biological Process | GO:0060800 | regulation of cell differentiation involved in embryonic placenta development                        | 1/2279 | 4/18866 | 0.4025066 | 0.6413241 | 0.5802928 | 1 | STK3  |
| Biological Process | GO:0060926 | cardiac pacemaker cell development                                                                   | 1/2279 | 4/18866 | 0.4025066 | 0.6413241 | 0.5802928 | 1 | MAML1 |
| Biological Process | GO:0060988 | lipid tube assembly                                                                                  | 1/2279 | 4/18866 | 0.4025066 | 0.6413241 | 0.5802928 | 1 | BIN1  |
| Biological Process | GO:0061073 | ciliary body morphogenesis                                                                           | 1/2279 | 4/18866 | 0.4025066 | 0.6413241 | 0.5802928 | 1 | TSKU  |
| Biological Process | GO:0061083 | regulation of protein refolding                                                                      | 1/2279 | 4/18866 | 0.4025066 | 0.6413241 | 0.5802928 | 1 | BAG5  |
| Biological Process | GO:0061084 | negative regulation of protein refolding                                                             | 1/2279 | 4/18866 | 0.4025066 | 0.6413241 | 0.5802928 | 1 | BAG5  |

|                    |            |                                                   |        |         |           |           |           |   |         |
|--------------------|------------|---------------------------------------------------|--------|---------|-----------|-----------|-----------|---|---------|
| Biological Process | GO:0061091 | regulation of phospholipid translocation          | 1/2279 | 4/18866 | 0.4025066 | 0.6413241 | 0.5802928 | 1 | ATP8A1  |
| Biological Process | GO:0061092 | positive regulation of phospholipid translocation | 1/2279 | 4/18866 | 0.4025066 | 0.6413241 | 0.5802928 | 1 | ATP8A1  |
| Biological Process | GO:0061113 | pancreas morphogenesis                            | 1/2279 | 4/18866 | 0.4025066 | 0.6413241 | 0.5802928 | 1 | NR5A2   |
| Biological Process | GO:0061182 | negative regulation of chondrocyte development    | 1/2279 | 4/18866 | 0.4025066 | 0.6413241 | 0.5802928 | 1 | RFLNA   |
| Biological Process | GO:0061218 | negative regulation of mesonephros development    | 1/2279 | 4/18866 | 0.4025066 | 0.6413241 | 0.5802928 | 1 | TACSTD2 |
| Biological Process | GO:0061502 | early endosome to recycling endosome transport    | 1/2279 | 4/18866 | 0.4025066 | 0.6413241 | 0.5802928 | 1 | SORL1   |
| Biological Process | GO:0061526 | acetylcholine secretion                           | 1/2279 | 4/18866 | 0.4025066 | 0.6413241 | 0.5802928 | 1 | SLC44A4 |
| Biological Process | GO:0061535 | glutamate secretion, neurotransmission            | 1/2279 | 4/18866 | 0.4025066 | 0.6413241 | 0.5802928 | 1 | NF1     |
| Biological Process | GO:0065001 | specification of axis polarity                    | 1/2279 | 4/18866 | 0.4025066 | 0.6413241 | 0.5802928 | 1 | NODAL   |

|                    |            |                                                         |        |         |           |           |           |   |           |
|--------------------|------------|---------------------------------------------------------|--------|---------|-----------|-----------|-----------|---|-----------|
| Biological Process | GO:0070164 | negative regulation of adiponectin secretion            | 1/2279 | 4/18866 | 0.4025066 | 0.6413241 | 0.5802928 | 1 | RAB11FIP1 |
| Biological Process | GO:0070294 | renal sodium ion absorption                             | 1/2279 | 4/18866 | 0.4025066 | 0.6413241 | 0.5802928 | 1 | SGK1      |
| Biological Process | GO:0070318 | positive regulation of G0 to G1 transition              | 1/2279 | 4/18866 | 0.4025066 | 0.6413241 | 0.5802928 | 1 | RHNO1     |
| Biological Process | GO:0070384 | Harderian gland development                             | 1/2279 | 4/18866 | 0.4025066 | 0.6413241 | 0.5802928 | 1 | RARG      |
| Biological Process | GO:0070666 | regulation of mast cell proliferation                   | 1/2279 | 4/18866 | 0.4025066 | 0.6413241 | 0.5802928 | 1 | BLK       |
| Biological Process | GO:0070836 | caveola assembly                                        | 1/2279 | 4/18866 | 0.4025066 | 0.6413241 | 0.5802928 | 1 | PACSIN2   |
| Biological Process | GO:0070966 | nuclear-transcribed mRNA catabolic process, no-go decay | 1/2279 | 4/18866 | 0.4025066 | 0.6413241 | 0.5802928 | 1 | CSDE1     |
| Biological Process | GO:0070995 | NADPH oxidation                                         | 1/2279 | 4/18866 | 0.4025066 | 0.6413241 | 0.5802928 | 1 | KCNAB2    |
| Biological Process | GO:0071034 | CUT catabolic process                                   | 1/2279 | 4/18866 | 0.4025066 | 0.6413241 | 0.5802928 | 1 | EXOSC2    |

|                    |            |                                                                                             |        |         |           |           |           |   |        |
|--------------------|------------|---------------------------------------------------------------------------------------------|--------|---------|-----------|-----------|-----------|---|--------|
| Biological Process | GO:0071043 | CUT metabolic process                                                                       | 1/2279 | 4/18866 | 0.4025066 | 0.6413241 | 0.5802928 | 1 | EXOSC2 |
| Biological Process | GO:0071226 | cellular response to molecule of fungal origin                                              | 1/2279 | 4/18866 | 0.4025066 | 0.6413241 | 0.5802928 | 1 | SCIMP  |
| Biological Process | GO:0071603 | endothelial cell-cell adhesion                                                              | 1/2279 | 4/18866 | 0.4025066 | 0.6413241 | 0.5802928 | 1 | JUP    |
| Biological Process | GO:0071623 | negative regulation of granulocyte chemotaxis                                               | 1/2279 | 4/18866 | 0.4025066 | 0.6413241 | 0.5802928 | 1 | C5AR2  |
| Biological Process | GO:0071650 | negative regulation of chemokine (C-C motif) ligand 5 production                            | 1/2279 | 4/18866 | 0.4025066 | 0.6413241 | 0.5802928 | 1 | IL10   |
| Biological Process | GO:0071673 | positive regulation of smooth muscle cell chemotaxis                                        | 1/2279 | 4/18866 | 0.4025066 | 0.6413241 | 0.5802928 | 1 | PDGFD  |
| Biological Process | GO:0071733 | transcriptional activation by promoter-enhancer looping                                     | 1/2279 | 4/18866 | 0.4025066 | 0.6413241 | 0.5802928 | 1 | ZFPM1  |
| Biological Process | GO:0072039 | regulation of mesenchymal cell apoptotic process involved in nephron morphogenesis          | 1/2279 | 4/18866 | 0.4025066 | 0.6413241 | 0.5802928 | 1 | PAX2   |
| Biological Process | GO:0072040 | negative regulation of mesenchymal cell apoptotic process involved in nephron morphogenesis | 1/2279 | 4/18866 | 0.4025066 | 0.6413241 | 0.5802928 | 1 | PAX2   |

|                    |            |                                                                                                  |        |         |           |           |           |   |        |
|--------------------|------------|--------------------------------------------------------------------------------------------------|--------|---------|-----------|-----------|-----------|---|--------|
| Biological Process | GO:0072278 | metanephric comma-shaped body morphogenesis                                                      | 1/2279 | 4/18866 | 0.4025066 | 0.6413241 | 0.5802928 | 1 | PDGFRB |
| Biological Process | GO:0072289 | metanephric nephron tubule formation                                                             | 1/2279 | 4/18866 | 0.4025066 | 0.6413241 | 0.5802928 | 1 | PAX2   |
| Biological Process | GO:0072716 | response to actinomycin D                                                                        | 1/2279 | 4/18866 | 0.4025066 | 0.6413241 | 0.5802928 | 1 | KAT7   |
| Biological Process | GO:0086017 | Purkinje myocyte action potential                                                                | 1/2279 | 4/18866 | 0.4025066 | 0.6413241 | 0.5802928 | 1 | GJA5   |
| Biological Process | GO:0090024 | negative regulation of neutrophil chemotaxis                                                     | 1/2279 | 4/18866 | 0.4025066 | 0.6413241 | 0.5802928 | 1 | CSAR2  |
| Biological Process | GO:0090081 | regulation of heart induction by regulation of canonical Wnt signaling pathway                   | 1/2279 | 4/18866 | 0.4025066 | 0.6413241 | 0.5802928 | 1 | WNT11  |
| Biological Process | GO:0090082 | positive regulation of heart induction by negative regulation of canonical Wnt signaling pathway | 1/2279 | 4/18866 | 0.4025066 | 0.6413241 | 0.5802928 | 1 | WNT11  |
| Biological Process | GO:0090116 | C-5 methylation of cytosine                                                                      | 1/2279 | 4/18866 | 0.4025066 | 0.6413241 | 0.5802928 | 1 | DNMT1  |
| Biological Process | GO:0090202 | gene looping                                                                                     | 1/2279 | 4/18866 | 0.4025066 | 0.6413241 | 0.5802928 | 1 | ZFPM1  |

|                    |            |                                                    |        |         |           |           |           |   |          |
|--------------------|------------|----------------------------------------------------|--------|---------|-----------|-----------|-----------|---|----------|
| Biological Process | GO:0090210 | regulation of establishment of blood-brain barrier | 1/2279 | 4/18866 | 0.4025066 | 0.6413241 | 0.5802928 | 1 | ADGRA2   |
| Biological Process | GO:0090261 | positive regulation of inclusion body assembly     | 1/2279 | 4/18866 | 0.4025066 | 0.6413241 | 0.5802928 | 1 | CLU      |
| Biological Process | GO:0090403 | oxidative stress-induced premature senescence      | 1/2279 | 4/18866 | 0.4025066 | 0.6413241 | 0.5802928 | 1 | ARNTL    |
| Biological Process | GO:0090461 | glutamate homeostasis                              | 1/2279 | 4/18866 | 0.4025066 | 0.6413241 | 0.5802928 | 1 | KCTD7    |
| Biological Process | GO:0090521 | glomerular visceral epithelial cell migration      | 1/2279 | 4/18866 | 0.4025066 | 0.6413241 | 0.5802928 | 1 | KANK1    |
| Biological Process | GO:0090579 | dsDNA loop formation                               | 1/2279 | 4/18866 | 0.4025066 | 0.6413241 | 0.5802928 | 1 | ZFPM1    |
| Biological Process | GO:0097026 | dendritic cell dendrite assembly                   | 1/2279 | 4/18866 | 0.4025066 | 0.6413241 | 0.5802928 | 1 | ARID1B   |
| Biological Process | GO:0097029 | mature conventional dendritic cell differentiation | 1/2279 | 4/18866 | 0.4025066 | 0.6413241 | 0.5802928 | 1 | PRTN3    |
| Biological Process | GO:0097252 | oligodendrocyte apoptotic process                  | 1/2279 | 4/18866 | 0.4025066 | 0.6413241 | 0.5802928 | 1 | TNFRSF21 |

|                    |            |                                                                                            |        |         |           |           |           |   |        |
|--------------------|------------|--------------------------------------------------------------------------------------------|--------|---------|-----------|-----------|-----------|---|--------|
| Biological Process | GO:0097296 | activation of cysteine-type endopeptidase activity involved in apoptotic signaling pathway | 1/2279 | 4/18866 | 0.4025066 | 0.6413241 | 0.5802928 | 1 | SMAD3  |
| Biological Process | GO:0097490 | sympathetic neuron projection extension                                                    | 1/2279 | 4/18866 | 0.4025066 | 0.6413241 | 0.5802928 | 1 | NRP2   |
| Biological Process | GO:0097491 | sympathetic neuron projection guidance                                                     | 1/2279 | 4/18866 | 0.4025066 | 0.6413241 | 0.5802928 | 1 | NRP2   |
| Biological Process | GO:0097676 | histone H3-K36 dimethylation                                                               | 1/2279 | 4/18866 | 0.4025066 | 0.6413241 | 0.5802928 | 1 | SETD2  |
| Biological Process | GO:0097749 | membrane tubulation                                                                        | 1/2279 | 4/18866 | 0.4025066 | 0.6413241 | 0.5802928 | 1 | CORO1C |
| Biological Process | GO:0098728 | germline stem cell asymmetric division                                                     | 1/2279 | 4/18866 | 0.4025066 | 0.6413241 | 0.5802928 | 1 | ZBTB16 |
| Biological Process | GO:0098904 | regulation of AV node cell action potential                                                | 1/2279 | 4/18866 | 0.4025066 | 0.6413241 | 0.5802928 | 1 | GJA5   |
| Biological Process | GO:0098971 | anterograde dendritic transport of neurotransmitter receptor complex                       | 1/2279 | 4/18866 | 0.4025066 | 0.6413241 | 0.5802928 | 1 | KIF5C  |
| Biological Process | GO:0099547 | regulation of translation at synapse, modulating synaptic transmission                     | 1/2279 | 4/18866 | 0.4025066 | 0.6413241 | 0.5802928 | 1 | CYFIP1 |

|                    |            |                                                                                                                     |        |         |           |           |           |   |        |
|--------------------|------------|---------------------------------------------------------------------------------------------------------------------|--------|---------|-----------|-----------|-----------|---|--------|
| Biological Process | GO:0106016 | positive regulation of inflammatory response to wounding                                                            | 1/2279 | 4/18866 | 0.4025066 | 0.6413241 | 0.5802928 | 1 | GRN    |
| Biological Process | GO:0106077 | histone succinylation                                                                                               | 1/2279 | 4/18866 | 0.4025066 | 0.6413241 | 0.5802928 | 1 | OGDH   |
| Biological Process | GO:0110024 | positive regulation of cardiac muscle myoblast proliferation                                                        | 1/2279 | 4/18866 | 0.4025066 | 0.6413241 | 0.5802928 | 1 | MEIS2  |
| Biological Process | GO:0110088 | hippocampal neuron apoptotic process                                                                                | 1/2279 | 4/18866 | 0.4025066 | 0.6413241 | 0.5802928 | 1 | CX3CR1 |
| Biological Process | GO:0110089 | regulation of hippocampal neuron apoptotic process                                                                  | 1/2279 | 4/18866 | 0.4025066 | 0.6413241 | 0.5802928 | 1 | CX3CR1 |
| Biological Process | GO:0140199 | negative regulation of adenylate cyclase-activating adrenergic receptor signaling pathway involved in heart process | 1/2279 | 4/18866 | 0.4025066 | 0.6413241 | 0.5802928 | 1 | GNAI2  |
| Biological Process | GO:0140213 | negative regulation of long-chain fatty acid import into cell                                                       | 1/2279 | 4/18866 | 0.4025066 | 0.6413241 | 0.5802928 | 1 | THBS1  |
| Biological Process | GO:0140243 | regulation of translation at synapse                                                                                | 1/2279 | 4/18866 | 0.4025066 | 0.6413241 | 0.5802928 | 1 | CYFIP1 |
| Biological Process | GO:1900109 | regulation of histone H3-K9 dimethylation                                                                           | 1/2279 | 4/18866 | 0.4025066 | 0.6413241 | 0.5802928 | 1 | PIH1D1 |



|                    |            |                                                                                               |        |         |           |           |           |   |         |
|--------------------|------------|-----------------------------------------------------------------------------------------------|--------|---------|-----------|-----------|-----------|---|---------|
| Biological Process | GO:1900127 | positive regulation of hyaluronan biosynthetic process                                        | 1/2279 | 4/18866 | 0.4025066 | 0.6413241 | 0.5802928 | 1 | PDGFB   |
| Biological Process | GO:1900365 | positive regulation of mRNA polyadenylation                                                   | 1/2279 | 4/18866 | 0.4025066 | 0.6413241 | 0.5802928 | 1 | CPEB3   |
| Biological Process | GO:1900377 | negative regulation of secondary metabolite biosynthetic process                              | 1/2279 | 4/18866 | 0.4025066 | 0.6413241 | 0.5802928 | 1 | RAPGEF2 |
| Biological Process | GO:1901145 | mesenchymal cell apoptotic process involved in nephron morphogenesis                          | 1/2279 | 4/18866 | 0.4025066 | 0.6413241 | 0.5802928 | 1 | PAX2    |
| Biological Process | GO:1901295 | regulation of canonical Wnt signaling pathway involved in cardiac muscle cell fate commitment | 1/2279 | 4/18866 | 0.4025066 | 0.6413241 | 0.5802928 | 1 | RBPJ    |
| Biological Process | GO:1901624 | negative regulation of lymphocyte chemotaxis                                                  | 1/2279 | 4/18866 | 0.4025066 | 0.6413241 | 0.5802928 | 1 | PADI2   |
| Biological Process | GO:1901656 | glycoside transport                                                                           | 1/2279 | 4/18866 | 0.4025066 | 0.6413241 | 0.5802928 | 1 | RALBP1  |
| Biological Process | GO:1901842 | negative regulation of high voltage-gated calcium channel activity                            | 1/2279 | 4/18866 | 0.4025066 | 0.6413241 | 0.5802928 | 1 | DYSF    |
| Biological Process | GO:1901873 | regulation of post-translational protein modification                                         | 1/2279 | 4/18866 | 0.4025066 | 0.6413241 | 0.5802928 | 1 | P3H1    |

|                    |            |                                                                     |        |         |           |           |           |   |        |
|--------------------|------------|---------------------------------------------------------------------|--------|---------|-----------|-----------|-----------|---|--------|
| Biological Process | GO:1902202 | regulation of hepatocyte growth factor receptor signaling pathway   | 1/2279 | 4/18866 | 0.4025066 | 0.6413241 | 0.5802928 | 1 | ESM1   |
| Biological Process | GO:1902261 | positive regulation of delayed rectifier potassium channel activity | 1/2279 | 4/18866 | 0.4025066 | 0.6413241 | 0.5802928 | 1 | NOS1AP |
| Biological Process | GO:1902511 | negative regulation of apoptotic DNA fragmentation                  | 1/2279 | 4/18866 | 0.4025066 | 0.6413241 | 0.5802928 | 1 | PAM16  |
| Biological Process | GO:1902523 | positive regulation of protein K63-linked ubiquitination            | 1/2279 | 4/18866 | 0.4025066 | 0.6413241 | 0.5802928 | 1 | NOD2   |
| Biological Process | GO:1902566 | regulation of eosinophil activation                                 | 1/2279 | 4/18866 | 0.4025066 | 0.6413241 | 0.5802928 | 1 | CCR2   |
| Biological Process | GO:1902576 | negative regulation of nuclear cell cycle DNA replication           | 1/2279 | 4/18866 | 0.4025066 | 0.6413241 | 0.5802928 | 1 | CHEK2  |
| Biological Process | GO:1902952 | positive regulation of dendritic spine maintenance                  | 1/2279 | 4/18866 | 0.4025066 | 0.6413241 | 0.5802928 | 1 | ZMYND8 |
| Biological Process | GO:1902953 | positive regulation of ER to Golgi vesicle-mediated transport       | 1/2279 | 4/18866 | 0.4025066 | 0.6413241 | 0.5802928 | 1 | SORL1  |
| Biological Process | GO:1903027 | regulation of opsonization                                          | 1/2279 | 4/18866 | 0.4025066 | 0.6413241 | 0.5802928 | 1 | MYO18A |

|                    |            |                                                                                                                                             |        |         |           |           |           |   |        |
|--------------------|------------|---------------------------------------------------------------------------------------------------------------------------------------------|--------|---------|-----------|-----------|-----------|---|--------|
| Biological Process | GO:1903061 | positive regulation of protein lipidation                                                                                                   | 1/2279 | 4/18866 | 0.4025066 | 0.6413241 | 0.5802928 | 1 | SVIP   |
| Biological Process | GO:1903108 | regulation of mitochondrial transcription                                                                                                   | 1/2279 | 4/18866 | 0.4025066 | 0.6413241 | 0.5802928 | 1 | PRKAA1 |
| Biological Process | GO:1903276 | regulation of sodium ion export across plasma membrane                                                                                      | 1/2279 | 4/18866 | 0.4025066 | 0.6413241 | 0.5802928 | 1 | FXYD1  |
| Biological Process | GO:1903278 | positive regulation of sodium ion export across plasma membrane                                                                             | 1/2279 | 4/18866 | 0.4025066 | 0.6413241 | 0.5802928 | 1 | FXYD1  |
| Biological Process | GO:1903334 | positive regulation of protein folding                                                                                                      | 1/2279 | 4/18866 | 0.4025066 | 0.6413241 | 0.5802928 | 1 | GRN    |
| Biological Process | GO:1903347 | negative regulation of bicellular tight junction assembly                                                                                   | 1/2279 | 4/18866 | 0.4025066 | 0.6413241 | 0.5802928 | 1 | TNF    |
| Biological Process | GO:1903527 | positive regulation of membrane tubulation                                                                                                  | 1/2279 | 4/18866 | 0.4025066 | 0.6413241 | 0.5802928 | 1 | ASAP1  |
| Biological Process | GO:1903576 | response to L-arginine                                                                                                                      | 1/2279 | 4/18866 | 0.4025066 | 0.6413241 | 0.5802928 | 1 | DHODH  |
| Biological Process | GO:1903762 | positive regulation of voltage-gated potassium channel activity involved in ventricular cardiac muscle cell action potential repolarization | 1/2279 | 4/18866 | 0.4025066 | 0.6413241 | 0.5802928 | 1 | NOS1AP |

|                    |            |                                                                                        |        |         |           |           |           |   |        |
|--------------------|------------|----------------------------------------------------------------------------------------|--------|---------|-----------|-----------|-----------|---|--------|
| Biological Process | GO:1903766 | positive regulation of potassium ion export across plasma membrane                     | 1/2279 | 4/18866 | 0.4025066 | 0.6413241 | 0.5802928 | 1 | ANO6   |
| Biological Process | GO:1903912 | negative regulation of endoplasmic reticulum stress-induced eIF2 alpha phosphorylation | 1/2279 | 4/18866 | 0.4025066 | 0.6413241 | 0.5802928 | 1 | NCK2   |
| Biological Process | GO:1903947 | positive regulation of ventricular cardiac muscle cell action potential                | 1/2279 | 4/18866 | 0.4025066 | 0.6413241 | 0.5802928 | 1 | NOS1AP |
| Biological Process | GO:1903999 | negative regulation of eating behavior                                                 | 1/2279 | 4/18866 | 0.4025066 | 0.6413241 | 0.5802928 | 1 | TTC21B |
| Biological Process | GO:1904351 | negative regulation of protein catabolic process in the vacuole                        | 1/2279 | 4/18866 | 0.4025066 | 0.6413241 | 0.5802928 | 1 | MGAT3  |
| Biological Process | GO:1904557 | L-alanine transmembrane transport                                                      | 1/2279 | 4/18866 | 0.4025066 | 0.6413241 | 0.5802928 | 1 | SLC7A8 |
| Biological Process | GO:1904742 | regulation of telomeric DNA binding                                                    | 1/2279 | 4/18866 | 0.4025066 | 0.6413241 | 0.5802928 | 1 | TNKS   |
| Biological Process | GO:1904823 | purine nucleobase transmembrane transport                                              | 1/2279 | 4/18866 | 0.4025066 | 0.6413241 | 0.5802928 | 1 | AQP9   |
| Biological Process | GO:1904849 | positive regulation of cell chemotaxis to fibroblast growth factor                     | 1/2279 | 4/18866 | 0.4025066 | 0.6413241 | 0.5802928 | 1 | FGFR1  |

|                    |            |                                                                                                        |        |         |           |           |           |   |        |
|--------------------|------------|--------------------------------------------------------------------------------------------------------|--------|---------|-----------|-----------|-----------|---|--------|
| Biological Process | GO:1904978 | regulation of endosome organization                                                                    | 1/2279 | 4/18866 | 0.4025066 | 0.6413241 | 0.5802928 | 1 | PRKN   |
| Biological Process | GO:1904999 | positive regulation of leukocyte adhesion to arterial endothelial cell                                 | 1/2279 | 4/18866 | 0.4025066 | 0.6413241 | 0.5802928 | 1 | TNF    |
| Biological Process | GO:1905026 | positive regulation of membrane repolarization during ventricular cardiac muscle cell action potential | 1/2279 | 4/18866 | 0.4025066 | 0.6413241 | 0.5802928 | 1 | NOS1AP |
| Biological Process | GO:1905033 | positive regulation of membrane repolarization during cardiac muscle cell action potential             | 1/2279 | 4/18866 | 0.4025066 | 0.6413241 | 0.5802928 | 1 | NOS1AP |
| Biological Process | GO:1905066 | regulation of canonical Wnt signaling pathway involved in heart development                            | 1/2279 | 4/18866 | 0.4025066 | 0.6413241 | 0.5802928 | 1 | RBPJ   |
| Biological Process | GO:1905166 | negative regulation of lysosomal protein catabolic process                                             | 1/2279 | 4/18866 | 0.4025066 | 0.6413241 | 0.5802928 | 1 | MGAT3  |
| Biological Process | GO:1905598 | negative regulation of low-density lipoprotein receptor activity                                       | 1/2279 | 4/18866 | 0.4025066 | 0.6413241 | 0.5802928 | 1 | MIR27A |
| Biological Process | GO:1905671 | regulation of lysosome organization                                                                    | 1/2279 | 4/18866 | 0.4025066 | 0.6413241 | 0.5802928 | 1 | GRN    |
| Biological Process | GO:1905880 | negative regulation of oogenesis                                                                       | 1/2279 | 4/18866 | 0.4025066 | 0.6413241 | 0.5802928 | 1 | NPPC   |

|                    |            |                                                                                                                  |        |         |           |           |           |   |         |
|--------------------|------------|------------------------------------------------------------------------------------------------------------------|--------|---------|-----------|-----------|-----------|---|---------|
| Biological Process | GO:1990009 | retinal cell apoptotic process                                                                                   | 1/2279 | 4/18866 | 0.4025066 | 0.6413241 | 0.5802928 | 1 | GDF6    |
| Biological Process | GO:1990086 | lens fiber cell apoptotic process                                                                                | 1/2279 | 4/18866 | 0.4025066 | 0.6413241 | 0.5802928 | 1 | TGFBR2  |
| Biological Process | GO:1990168 | protein K33-linked deubiquitination                                                                              | 1/2279 | 4/18866 | 0.4025066 | 0.6413241 | 0.5802928 | 1 | TNFAIP3 |
| Biological Process | GO:1990441 | negative regulation of transcription from RNA polymerase II promoter in response to endoplasmic reticulum stress | 1/2279 | 4/18866 | 0.4025066 | 0.6413241 | 0.5802928 | 1 | NCK2    |
| Biological Process | GO:2000137 | negative regulation of cell proliferation involved in heart morphogenesis                                        | 1/2279 | 4/18866 | 0.4025066 | 0.6413241 | 0.5802928 | 1 | NOTCH1  |
| Biological Process | GO:2000182 | regulation of progesterone biosynthetic process                                                                  | 1/2279 | 4/18866 | 0.4025066 | 0.6413241 | 0.5802928 | 1 | DGKQ    |
| Biological Process | GO:2000346 | negative regulation of hepatocyte proliferation                                                                  | 1/2279 | 4/18866 | 0.4025066 | 0.6413241 | 0.5802928 | 1 | CPB2    |
| Biological Process | GO:2000410 | regulation of thymocyte migration                                                                                | 1/2279 | 4/18866 | 0.4025066 | 0.6413241 | 0.5802928 | 1 | CCR2    |
| Biological Process | GO:2000418 | positive regulation of eosinophil migration                                                                      | 1/2279 | 4/18866 | 0.4025066 | 0.6413241 | 0.5802928 | 1 | DAPK2   |

|                    |            |                                                                                |         |           |           |           |           |    |                                                                                      |
|--------------------|------------|--------------------------------------------------------------------------------|---------|-----------|-----------|-----------|-----------|----|--------------------------------------------------------------------------------------|
| Biological Process | GO:2000546 | positive regulation of endothelial cell chemotaxis to fibroblast growth factor | 1/2279  | 4/18866   | 0.4025066 | 0.6413241 | 0.5802928 | 1  | FGFR1                                                                                |
| Biological Process | GO:2000672 | negative regulation of motor neuron apoptotic process                          | 1/2279  | 4/18866   | 0.4025066 | 0.6413241 | 0.5802928 | 1  | CRLF1                                                                                |
| Biological Process | GO:2000793 | cell proliferation involved in heart valve development                         | 1/2279  | 4/18866   | 0.4025066 | 0.6413241 | 0.5802928 | 1  | NOTCH1                                                                               |
| Biological Process | GO:2001168 | positive regulation of histone H2B ubiquitination                              | 1/2279  | 4/18866   | 0.4025066 | 0.6413241 | 0.5802928 | 1  | RNF40                                                                                |
| Biological Process | GO:2001288 | positive regulation of caveolin-mediated endocytosis                           | 1/2279  | 4/18866   | 0.4025066 | 0.6413241 | 0.5802928 | 1  | ITSN1                                                                                |
| Biological Process | GO:0097237 | cellular response to toxic substance                                           | 16/2279 | 122/18866 | 0.4029802 | 0.6418342 | 0.5807544 | 16 | MPO/LPO/TNF/HBB/MGST2/ABTB2/CAT/NFE2L2/FIS1/NXN/GSTO1/TXNRD2/GSTO2/SIRT3/PRXL2B/PRKN |
| Biological Process | GO:0006360 | transcription by RNA polymerase I                                              | 9/2279  | 66/18866  | 0.4031646 | 0.6418342 | 0.5807544 | 9  | TAF1C/WDR43/POLR2F/CCNH/PIH1D1/TAF1D/ERCC2/MARS1/MACROH2A2                           |
| Biological Process | GO:0007585 | respiratory gaseous exchange by respiratory system                             | 9/2279  | 66/18866  | 0.4031646 | 0.6418342 | 0.5807544 | 9  | CSF2RB/PHOX2A/SFTPD/CHST11/NDST1/MTG2/FTO/YWHAZ/HNMT                                 |
| Biological Process | GO:1905207 | regulation of cardiocyte differentiation                                       | 9/2279  | 66/18866  | 0.4031646 | 0.6418342 | 0.5807544 | 9  | CTDP1/MIR145/MIR199A1/DLL1/RBPJ/TGFB1/ARRB2/MIR199A2/MEF2C                           |

|                    |            |                                                                  |         |           |           |           |           |    |                                                                                         |
|--------------------|------------|------------------------------------------------------------------|---------|-----------|-----------|-----------|-----------|----|-----------------------------------------------------------------------------------------|
| Biological Process | GO:2000378 | negative regulation of reactive oxygen species metabolic process | 9/2279  | 66/18866  | 0.4031646 | 0.6418342 | 0.5807544 | 9  | IL10/MIR199A1/PAX2/HK2/BCR/BCL2/MIR199A2/SIRT3/PRKN                                     |
| Biological Process | GO:0006305 | DNA alkylation                                                   | 10/2279 | 74/18866  | 0.4038083 | 0.6421147 | 0.5810082 | 10 | PIWIL4/MOV10L1/GATAD2A/EHMT2/KDM1B/ATF7IP/GRHL2/MTA2/DNMT1/MORC1                        |
| Biological Process | GO:0006306 | DNA methylation                                                  | 10/2279 | 74/18866  | 0.4038083 | 0.6421147 | 0.5810082 | 10 | PIWIL4/MOV10L1/GATAD2A/EHMT2/KDM1B/ATF7IP/GRHL2/MTA2/DNMT1/MORC1                        |
| Biological Process | GO:0032481 | positive regulation of type I interferon production              | 10/2279 | 74/18866  | 0.4038083 | 0.6421147 | 0.5810082 | 10 | IRF5/SETD2/POLR2F/TLR9/CRCP/CREBBP/DDX41/RELA/FLOT1/STING1                              |
| Biological Process | GO:0043507 | positive regulation of JUN kinase activity                       | 10/2279 | 74/18866  | 0.4038083 | 0.6421147 | 0.5810082 | 10 | ERN1/TNF/ZEB2/TRAF2/TLR9/TNIK/RIPK1/TAOK3/DBNL/MAP3K20                                  |
| Biological Process | GO:2001259 | positive regulation of cation channel activity                   | 10/2279 | 74/18866  | 0.4038083 | 0.6421147 | 0.5810082 | 10 | CCR2/NOS1AP/P2RY6/HTT/GSTO1/ANK2/CASQ1/FGF14/STIMATE/CRACR2A                            |
| Biological Process | GO:0032091 | negative regulation of protein binding                           | 14/2279 | 106/18866 | 0.4038139 | 0.6421147 | 0.5810082 | 14 | SLPI/CTS2/ZFPM1/SORL1/IL10/ITGB1BP1/CCM2L/DISC1/ATP2A3/CSNK1E/PDGFB/ARRB2/DTNBP1/TFIP11 |
| Biological Process | GO:1904029 | regulation of cyclin-dependent protein kinase activity           | 14/2279 | 106/18866 | 0.4038139 | 0.6421147 | 0.5810082 | 14 | BLM/TNFAIP3/FBXO7/LATS2/CDC25A/PDGFB/CCNH/CCNA1/HHEX/HEXIM1/CCNY/HERC5/CCNYL1/CCNP      |
| Biological Process | GO:0001657 | ureteric bud development                                         | 13/2279 | 98/18866  | 0.404074  | 0.6422822 | 0.5811598 | 13 | TACSTD2/SMAD3/ILK/SMAD7/WNT11/PAX2/FGFR1/RARA/BMPER/CAT/BCL2/CRLF1/HOXB7                |



|                    |            |                                                |         |           |           |           |           |    |                                                                                                                                                                         |
|--------------------|------------|------------------------------------------------|---------|-----------|-----------|-----------|-----------|----|-------------------------------------------------------------------------------------------------------------------------------------------------------------------------|
| Biological Process | GO:0010657 | muscle cell apoptotic process                  | 13/2279 | 98/18866  | 0.404074  | 0.6422822 | 0.5811598 | 13 | PPARG/MIR140/MIR145/ARRB1/E2F3/MIR199A1/MIR24-2/ILK/NFE2L2/ARRB2/MIR138-2/MIR199A2/DNMT1                                                                                |
| Biological Process | GO:0021954 | central nervous system neuron development      | 11/2279 | 82/18866  | 0.404122  | 0.6422822 | 0.5811598 | 11 | NRP2/ZEB2/EPHB3/DISC1/ZMIZ1/RAPGEF2/CDH11/NDEL1/SPTBN4/NPY/TSKU                                                                                                         |
| Biological Process | GO:1903351 | cellular response to dopamine                  | 12/2279 | 90/18866  | 0.4041908 | 0.6422842 | 0.5811615 | 12 | KLF16/DNM2/HRH1/HTR3A/GNA11/CHRM2/PALM/ARRB2/GNG2/GNAO1/DTNBP1/PRKN                                                                                                     |
| Biological Process | GO:0006473 | protein acetylation                            | 26/2279 | 203/18866 | 0.406246  | 0.6434836 | 0.5822468 | 26 | SRCAP/BRCA2/KANSL1/ARRB1/BRD1/EPC1/RPS6KA4/TAF10/KANSL2/SPHK2/CTBP1/POR/NCOA1/CREBBP/RSF1/ARNTL/PER1/PIH1D1/NAA16/FOXO1/RUVBL1/KAT7/ING5/LIF/PAXIP1/PRKAA1              |
| Biological Process | GO:0051236 | establishment of RNA localization              | 26/2279 | 203/18866 | 0.406246  | 0.6434836 | 0.5822468 | 26 | NXF1/FIP1L1/TNKS/CPSF3/SETD2/RAE1/TGFBR2/SMG7/PABPN1/ENY2/BICD2/NUP93/IGF2BP3/SEC13/KIF5C/SMG6/SNUPN/MYO1C/HHEX/ZC3H3/RBM15B/NOL6/CPSF4/FLOT1/PCID2/NCBP3               |
| Biological Process | GO:0043487 | regulation of RNA stability                    | 25/2279 | 195/18866 | 0.4072527 | 0.6434836 | 0.5822468 | 25 | EXOSC2/SLC11A1/TNFRSF1B/PABPC4/TNPO1/PRKCA/LARP1/ZC3H12D/PCBP4/SAMD4A/CPEB3/IGF2BP3/PSMF1/FTO/YWHAZ/PSMB7/PAIP1/TNFSF13/SYNERIP/EIF4G1/PSMD13/PCID2/TBRG4/TENT5C/TENT5A |
| Biological Process | GO:0001696 | gastric acid secretion                         | 3/2279  | 19/18866  | 0.407587  | 0.6434836 | 0.5822468 | 3  | SGK1/GHRL/KCNQ1                                                                                                                                                         |
| Biological Process | GO:0002922 | positive regulation of humoral immune response | 3/2279  | 19/18866  | 0.407587  | 0.6434836 | 0.5822468 | 3  | TNF/PHB/PTPRC                                                                                                                                                           |
| Biological Process | GO:0003159 | morphogenesis of an endothelium                | 3/2279  | 19/18866  | 0.407587  | 0.6434836 | 0.5822468 | 3  | FOXP1/CCM2/RBPJ                                                                                                                                                         |

|                    |            |                                                          |        |          |          |           |           |   |                      |
|--------------------|------------|----------------------------------------------------------|--------|----------|----------|-----------|-----------|---|----------------------|
| Biological Process | GO:0006271 | DNA strand elongation involved in DNA replication        | 3/2279 | 19/18866 | 0.407587 | 0.6434836 | 0.5822468 | 3 | POLE/GINS3/POLD3     |
| Biological Process | GO:0009219 | pyrimidine deoxyribonucleotide metabolic process         | 3/2279 | 19/18866 | 0.407587 | 0.6434836 | 0.5822468 | 3 | UNG/NTHL1/DCTD       |
| Biological Process | GO:0010544 | negative regulation of platelet activation               | 3/2279 | 19/18866 | 0.407587 | 0.6434836 | 0.5822468 | 3 | CD9/UBASH3B/PDGFB    |
| Biological Process | GO:0010561 | negative regulation of glycoprotein biosynthetic process | 3/2279 | 19/18866 | 0.407587 | 0.6434836 | 0.5822468 | 3 | MIR101-2/AGO2/ITM2C  |
| Biological Process | GO:0019054 | modulation by virus of host cellular process             | 3/2279 | 19/18866 | 0.407587 | 0.6434836 | 0.5822468 | 3 | PABPN1/BCL2L1/CPSF4  |
| Biological Process | GO:0032011 | ARF protein signal transduction                          | 3/2279 | 19/18866 | 0.407587 | 0.6434836 | 0.5822468 | 3 | IQSEC1/CYTH4/FBXO8   |
| Biological Process | GO:0032012 | regulation of ARF protein signal transduction            | 3/2279 | 19/18866 | 0.407587 | 0.6434836 | 0.5822468 | 3 | IQSEC1/CYTH4/FBXO8   |
| Biological Process | GO:0032026 | response to magnesium ion                                | 3/2279 | 19/18866 | 0.407587 | 0.6434836 | 0.5822468 | 3 | SLFN14/THBS1/SLC41A1 |
| Biological Process | GO:0035728 | response to hepatocyte growth factor                     | 3/2279 | 19/18866 | 0.407587 | 0.6434836 | 0.5822468 | 3 | IL10/CREB1/RELA      |

|                    |            |                                                    |        |          |          |           |           |   |                      |
|--------------------|------------|----------------------------------------------------|--------|----------|----------|-----------|-----------|---|----------------------|
| Biological Process | GO:0035988 | chondrocyte proliferation                          | 3/2279 | 19/18866 | 0.407587 | 0.6434836 | 0.5822468 | 3 | SMAD7/BMPR1B/LTF     |
| Biological Process | GO:0042053 | regulation of dopamine metabolic process           | 3/2279 | 19/18866 | 0.407587 | 0.6434836 | 0.5822468 | 3 | COMT/ITGB2/PRKN      |
| Biological Process | GO:0042069 | regulation of catecholamine metabolic process      | 3/2279 | 19/18866 | 0.407587 | 0.6434836 | 0.5822468 | 3 | COMT/ITGB2/PRKN      |
| Biological Process | GO:0043373 | CD4-positive, alpha-beta T cell lineage commitment | 3/2279 | 19/18866 | 0.407587 | 0.6434836 | 0.5822468 | 3 | ZFPM1/LOXL3/LY9      |
| Biological Process | GO:0045947 | negative regulation of translational initiation    | 3/2279 | 19/18866 | 0.407587 | 0.6434836 | 0.5822468 | 3 | LARP1/AGO2/BANK1     |
| Biological Process | GO:0046653 | tetrahydrofolate metabolic process                 | 3/2279 | 19/18866 | 0.407587 | 0.6434836 | 0.5822468 | 3 | MTHFD1L/MTHFS/MTHFD1 |
| Biological Process | GO:0048245 | eosinophil chemotaxis                              | 3/2279 | 19/18866 | 0.407587 | 0.6434836 | 0.5822468 | 3 | CCL5/HRH1/DAPK2      |
| Biological Process | GO:0048486 | parasympathetic nervous system development         | 3/2279 | 19/18866 | 0.407587 | 0.6434836 | 0.5822468 | 3 | NRP2/PHOX2A/HES3     |
| Biological Process | GO:0048490 | anterograde synaptic vesicle transport             | 3/2279 | 19/18866 | 0.407587 | 0.6434836 | 0.5822468 | 3 | CNIH2/AP3D1/DTNBP1   |

|                    |            |                                                                                 |        |          |          |           |           |   |                    |
|--------------------|------------|---------------------------------------------------------------------------------|--------|----------|----------|-----------|-----------|---|--------------------|
| Biological Process | GO:0060438 | trachea development                                                             | 3/2279 | 19/18866 | 0.407587 | 0.6434836 | 0.5822468 | 3 | TGFBR2/RARA/RARG   |
| Biological Process | GO:0060973 | cell migration involved in heart development                                    | 3/2279 | 19/18866 | 0.407587 | 0.6434836 | 0.5822468 | 3 | ENG/NOTCH1/PDGFRB  |
| Biological Process | GO:0061154 | endothelial tube morphogenesis                                                  | 3/2279 | 19/18866 | 0.407587 | 0.6434836 | 0.5822468 | 3 | FOXP1/CCM2/RBPJ    |
| Biological Process | GO:0071625 | vocalization behavior                                                           | 3/2279 | 19/18866 | 0.407587 | 0.6434836 | 0.5822468 | 3 | NRXN1/NRXN2/SHANK2 |
| Biological Process | GO:0097623 | potassium ion export across plasma membrane                                     | 3/2279 | 19/18866 | 0.407587 | 0.6434836 | 0.5822468 | 3 | KCNE1/KCNQ1/ANO6   |
| Biological Process | GO:0098915 | membrane repolarization during ventricular cardiac muscle cell action potential | 3/2279 | 19/18866 | 0.407587 | 0.6434836 | 0.5822468 | 3 | KCNE1/NOS1AP/KCNQ1 |
| Biological Process | GO:0099514 | synaptic vesicle cytoskeletal transport                                         | 3/2279 | 19/18866 | 0.407587 | 0.6434836 | 0.5822468 | 3 | CNIH2/AP3D1/DTNBP1 |
| Biological Process | GO:0099517 | synaptic vesicle transport along microtubule                                    | 3/2279 | 19/18866 | 0.407587 | 0.6434836 | 0.5822468 | 3 | CNIH2/AP3D1/DTNBP1 |
| Biological Process | GO:0150079 | negative regulation of neuroinflammatory response                               | 3/2279 | 19/18866 | 0.407587 | 0.6434836 | 0.5822468 | 3 | TNFRSF1B/PTPRC/GRN |

|                    |            |                                                                                             |         |           |           |           |           |    |                                                                                                                                                                                                                                                                                                                                        |
|--------------------|------------|---------------------------------------------------------------------------------------------|---------|-----------|-----------|-----------|-----------|----|----------------------------------------------------------------------------------------------------------------------------------------------------------------------------------------------------------------------------------------------------------------------------------------------------------------------------------------|
| Biological Process | GO:1900747 | negative regulation of vascular endothelial growth factor signaling pathway                 | 3/2279  | 19/18866  | 0.407587  | 0.6434836 | 0.5822468 | 3  | MIR199A1/MIR199A2/ADGRA2                                                                                                                                                                                                                                                                                                               |
| Biological Process | GO:1903975 | regulation of glial cell migration                                                          | 3/2279  | 19/18866  | 0.407587  | 0.6434836 | 0.5822468 | 3  | CCR2/CERS2/CX3CR1                                                                                                                                                                                                                                                                                                                      |
| Biological Process | GO:1904683 | regulation of metalloendopeptidase activity                                                 | 3/2279  | 19/18866  | 0.407587  | 0.6434836 | 0.5822468 | 3  | SORL1/MBP/MIR24-2                                                                                                                                                                                                                                                                                                                      |
| Biological Process | GO:1990182 | exosomal secretion                                                                          | 3/2279  | 19/18866  | 0.407587  | 0.6434836 | 0.5822468 | 3  | RAB27A/COP55/PRKN                                                                                                                                                                                                                                                                                                                      |
| Biological Process | GO:2000010 | positive regulation of protein localization to cell surface                                 | 3/2279  | 19/18866  | 0.407587  | 0.6434836 | 0.5822468 | 3  | TM9SF4/TNF/MAP1A                                                                                                                                                                                                                                                                                                                       |
| Biological Process | GO:2000696 | regulation of epithelial cell differentiation involved in kidney development                | 3/2279  | 19/18866  | 0.407587  | 0.6434836 | 0.5822468 | 3  | PAX2/WWTR1/LIF                                                                                                                                                                                                                                                                                                                         |
| Biological Process | GO:0006401 | RNA catabolic process                                                                       | 52/2279 | 415/18866 | 0.4106195 | 0.6481635 | 0.5864813 | 52 | RNH1/PRR5L/RNASE3/LSM1/EXOSC2/SLC11A1/ERN1/TNFRSF1B/TNRC6B/PABPC4/TNPO1/SLFN14/PRKCA/AGO1/DEDD2/LARP1/CSDE1/ZC3H12D/PKP1/PCBP4/SAMD4A/SMG7/CTIF/AGO2/EDC3/LSM7/CPEB3/IGF2BP3/SMG6/PSMF1/PPP2R1A/FTO/NBAS/YWHAZ/PSMB7/ZHX2/PAIP1/DIS3L2/SND1/TNFSF13/SECISBP2/RPL23A/ZCCHC8/SYNERIP/ISG20/EIF4G1/PSMD13/PCID2/TBRG4/GRSF1/TENT5C/TENT5A |
| Biological Process | GO:0002433 | immune response-regulating cell surface receptor signaling pathway involved in phagocytosis | 18/2279 | 139/18866 | 0.4142767 | 0.6525201 | 0.5904233 | 18 | ELMO1/DOCK1/PIK3R1/WIPF1/FGR/CYFIP2/BAIAP2/WASL/PTPRJ/VAV2/PTPRC/ACTG1/NCKAP1/PRKCE/MYO1C/PLCG1/CYFIP1/VAV3                                                                                                                                                                                                                            |
| Biological Process | GO:0038096 | Fc-gamma receptor signaling pathway involved in phagocytosis                                | 18/2279 | 139/18866 | 0.4142767 | 0.6525201 | 0.5904233 | 18 | ELMO1/DOCK1/PIK3R1/WIPF1/FGR/CYFIP2/BAIAP2/WASL/PTPRJ/VAV2/PTPRC/ACTG1/NCKAP1/PRKCE/MYO1C/PLCG1/CYFIP1/VAV3                                                                                                                                                                                                                            |

|                    |            |                                                                |        |          |           |           |           |   |                                 |
|--------------------|------------|----------------------------------------------------------------|--------|----------|-----------|-----------|-----------|---|---------------------------------|
| Biological Process | GO:0001556 | oocyte maturation                                              | 4/2279 | 27/18866 | 0.4147531 | 0.6525201 | 0.5904233 | 4 | BRCA2/PPP2R1A/DMC1/NPPC         |
| Biological Process | GO:0001702 | gastrulation with mouth forming second                         | 4/2279 | 27/18866 | 0.4147531 | 0.6525201 | 0.5904233 | 4 | LRP5L/ZBTB17/NODAL/OTX2         |
| Biological Process | GO:0001963 | synaptic transmission, dopaminergic                            | 4/2279 | 27/18866 | 0.4147531 | 0.6525201 | 0.5904233 | 4 | CRHBP/ARRB2/FLOT1/PRKN          |
| Biological Process | GO:0003148 | outflow tract septum morphogenesis                             | 4/2279 | 27/18866 | 0.4147531 | 0.6525201 | 0.5904233 | 4 | NRP2/TGFBR2/RARA/ENG            |
| Biological Process | GO:0006829 | zinc ion transport                                             | 4/2279 | 27/18866 | 0.4147531 | 0.6525201 | 0.5904233 | 4 | TRPM2/SLC39A11/TMEM163/SLC39A13 |
| Biological Process | GO:0007214 | gamma-aminobutyric acid signaling pathway                      | 4/2279 | 27/18866 | 0.4147531 | 0.6525201 | 0.5904233 | 4 | GNAI2/PLCL1/GABBR1/GABBR2       |
| Biological Process | GO:0018195 | peptidyl-arginine modification                                 | 4/2279 | 27/18866 | 0.4147531 | 0.6525201 | 0.5904233 | 4 | PRMT2/PADI2/ART5/ART4           |
| Biological Process | GO:0032607 | interferon-alpha production                                    | 4/2279 | 27/18866 | 0.4147531 | 0.6525201 | 0.5904233 | 4 | IL10/IRF5/SETD2/TLR9            |
| Biological Process | GO:0032786 | positive regulation of DNA-templated transcription, elongation | 4/2279 | 27/18866 | 0.4147531 | 0.6525201 | 0.5904233 | 4 | BRD4/SCAF8/KAT7/CDK13           |

|                    |            |                                                                        |        |          |           |           |           |   |                              |
|--------------------|------------|------------------------------------------------------------------------|--------|----------|-----------|-----------|-----------|---|------------------------------|
| Biological Process | GO:0032897 | negative regulation of viral transcription                             | 4/2279 | 27/18866 | 0.4147531 | 0.6525201 | 0.5904233 | 4 | TRIM27/TRIM8/CCL5/HDAC1      |
| Biological Process | GO:0034243 | regulation of transcription elongation from RNA polymerase II promoter | 4/2279 | 27/18866 | 0.4147531 | 0.6525201 | 0.5904233 | 4 | BRD4/WDR43/RECQL5/CDK13      |
| Biological Process | GO:0034698 | response to gonadotropin                                               | 4/2279 | 27/18866 | 0.4147531 | 0.6525201 | 0.5904233 | 4 | POR/NOTCH1/HMGCS1/INHBA      |
| Biological Process | GO:0046426 | negative regulation of receptor signaling pathway via JAK-STAT         | 4/2279 | 27/18866 | 0.4147531 | 0.6525201 | 0.5904233 | 4 | PPP2R1A/GGNBP2/BCL3/INPP5F   |
| Biological Process | GO:0048143 | astrocyte activation                                                   | 4/2279 | 27/18866 | 0.4147531 | 0.6525201 | 0.5904233 | 4 | TNF/FPR2/APP/GRN             |
| Biological Process | GO:0050996 | positive regulation of lipid catabolic process                         | 4/2279 | 27/18866 | 0.4147531 | 0.6525201 | 0.5904233 | 4 | PNPLA2/PRKCE/ABHD5/CPT1A     |
| Biological Process | GO:0072207 | metanephric epithelium development                                     | 4/2279 | 27/18866 | 0.4147531 | 0.6525201 | 0.5904233 | 4 | PAX2/WWTR1/ACAT1/LIF         |
| Biological Process | GO:1901623 | regulation of lymphocyte chemotaxis                                    | 4/2279 | 27/18866 | 0.4147531 | 0.6525201 | 0.5904233 | 4 | CCR2/CCL5/PADI2/CCL27        |
| Biological Process | GO:1905208 | negative regulation of cardiocyte differentiation                      | 4/2279 | 27/18866 | 0.4147531 | 0.6525201 | 0.5904233 | 4 | CTDP1/MIR199A1/DLL1/MIR199A2 |

|                    |            |                                                            |         |           |           |           |           |    |                                                                                                                                                                                                                                                               |
|--------------------|------------|------------------------------------------------------------|---------|-----------|-----------|-----------|-----------|----|---------------------------------------------------------------------------------------------------------------------------------------------------------------------------------------------------------------------------------------------------------------|
| Biological Process | GO:0007059 | chromosome segregation                                     | 42/2279 | 334/18866 | 0.4148297 | 0.6525326 | 0.5904347 | 42 | MAD1L1/TTN/TNKS/NDE1/RMI2/NSMCE2/RCC1/DYNC1H1/CHAMP1/RECQL5/CUL3/EME1/MEIOB/CDC16/MIS12/UVRAG/DCTN2/RNF212/TACC3/STAG1/NUMA1/PPP2R1A/MSTO1/NEK6/RB1/RAD21L1/DMC1/CDC45/DIS3L2/ANAPC7/SPAG5/HECW2/SLX4/TEX12/NDEL1/NTMT1/BANF1/ERCC2/PCID2/TERB2/ABRAXAS1/SLF1 |
| Biological Process | GO:0006140 | regulation of nucleotide metabolic process                 | 16/2279 | 123/18866 | 0.4161989 | 0.6544696 | 0.5921873 | 16 | HDAC4/PRKAG2/CDA/RVFRN/ENO1/PFKFB4/RAE1/CBFA2T3/APP/PGAM1/SPHK2/NUP93/SEC13/ESRRB/PFKFB3/PRKAA1                                                                                                                                                               |
| Biological Process | GO:0070252 | actin-mediated cell contraction                            | 16/2279 | 123/18866 | 0.4161989 | 0.6544696 | 0.5921873 | 16 | PDE4D/KCNE1/TTN/CCDC88C/CACNA1C/GJA5/TNNT3/JUP/BIN1/NOS1AP/SCN1A/SNTA1/KCNQ1/ANK2/FRMD6/TMOD1                                                                                                                                                                 |
| Biological Process | GO:000819  | sister chromatid segregation                               | 25/2279 | 196/18866 | 0.4177236 | 0.6567121 | 0.5942165 | 25 | MAD1L1/TTN/TNKS/RMI2/NSMCE2/CHAMP1/CUL3/CDC16/MIS12/DCTN2/TACC3/STAG1/NUMA1/PPP2R1A/MSTO1/NEK6/RB1/RAD21L1/CDC45/DIS3L2/ANAPC7/SPAG5/HECW2/PCID2/SLF1                                                                                                         |
| Biological Process | GO:0010596 | negative regulation of endothelial cell migration          | 14/2279 | 107/18866 | 0.418006  | 0.6567121 | 0.5942165 | 14 | PPARG/ITGB1BP1/MIR199A1/TNF/MIR101-2/JUP/THBS1/MIR24-2/TGFB1/VASH1/MIR199A2/NOTCH1/MEF2C/SP100                                                                                                                                                                |
| Biological Process | GO:0099175 | regulation of postsynapse organization                     | 14/2279 | 107/18866 | 0.418006  | 0.6567121 | 0.5942165 | 14 | NRP2/SSH1/ZMYND8/BAIAP2/ZDHHC2/NRXN1/GHRL/SIPA1L1/DNM3/DNM1L/UBE3A/CUX2/DBNL/LRFN2                                                                                                                                                                            |
| Biological Process | GO:0000291 | nuclear-transcribed mRNA catabolic process, exonucleolytic | 5/2279  | 35/18866  | 0.4183162 | 0.6567121 | 0.5942165 | 5  | LSM1/EXOSC2/EDC3/LSM7/DIS3L2                                                                                                                                                                                                                                  |
| Biological Process | GO:0001914 | regulation of T cell mediated cytotoxicity                 | 5/2279  | 35/18866  | 0.4183162 | 0.6567121 | 0.5942165 | 5  | HLA-F/RIPK3/PTPRC/FADD/CYRIB                                                                                                                                                                                                                                  |
| Biological Process | GO:0006691 | leukotriene metabolic process                              | 5/2279  | 35/18866  | 0.4183162 | 0.6567121 | 0.5942165 | 5  | ABCC1/GGT1/CYP4F3/MGST2/DPEP2                                                                                                                                                                                                                                 |



|                    |            |                                                                        |         |          |           |           |           |    |                                                                                 |
|--------------------|------------|------------------------------------------------------------------------|---------|----------|-----------|-----------|-----------|----|---------------------------------------------------------------------------------|
| Biological Process | GO:0010259 | multicellular organism aging                                           | 5/2279  | 35/18866 | 0.4183162 | 0.6567121 | 0.5942165 | 5  | INPP5D/DDC/SLC1A2/PRDM2/ERCC1                                                   |
| Biological Process | GO:0060674 | placenta blood vessel development                                      | 5/2279  | 35/18866 | 0.4183162 | 0.6567121 | 0.5942165 | 5  | RBPJ/VASH1/GGNBP2/TMED2/PLCD3                                                   |
| Biological Process | GO:0070536 | protein K63-linked deubiquitination                                    | 5/2279  | 35/18866 | 0.4183162 | 0.6567121 | 0.5942165 | 5  | TNFAIP3/OTUB2/CYLD/ABRAXAS1/BABAM2                                              |
| Biological Process | GO:0072525 | pyridine-containing compound biosynthetic process                      | 5/2279  | 35/18866 | 0.4183162 | 0.6567121 | 0.5942165 | 5  | NADK/NMNAT3/PDXK/PARP10/PARP9                                                   |
| Biological Process | GO:0002474 | antigen processing and presentation of peptide antigen via MHC class I | 13/2279 | 99/18866 | 0.4188395 | 0.6569909 | 0.5944687 | 13 | CALR/LNPEP/NCF4/HLA-C/HLA-F/NCF2/ITGB5/SEC13/PSMF1/SEC24C/PSMB7/SEC31A/PSMD13   |
| Biological Process | GO:0050830 | defense response to Gram-positive bacterium                            | 13/2279 | 99/18866 | 0.4188395 | 0.6569909 | 0.5944687 | 13 | DEFA4/CTSG/RNASE3/NLRP3/FGR/TNF/LYG2/STAB2/DEFB1/PGLYRP1/C10orf99/MPEG1/PGLYRP4 |
| Biological Process | GO:0072163 | mesonephric epithelium development                                     | 13/2279 | 99/18866 | 0.4188395 | 0.6569909 | 0.5944687 | 13 | TACSTD2/SMAD3/ILK/SMAD7/WNT11/PAX2/FGFR1/RARA/BMPER/CAT/BCL2/CRLF1/HOXB7        |
| Biological Process | GO:0072164 | mesonephric tubule development                                         | 13/2279 | 99/18866 | 0.4188395 | 0.6569909 | 0.5944687 | 13 | TACSTD2/SMAD3/ILK/SMAD7/WNT11/PAX2/FGFR1/RARA/BMPER/CAT/BCL2/CRLF1/HOXB7        |
| Biological Process | GO:0090277 | positive regulation of peptide hormone secretion                       | 13/2279 | 99/18866 | 0.4188395 | 0.6569909 | 0.5944687 | 13 | NADK/MYRIP/ARRB1/GPLD1/ITSN1/TCF7L2/GIPR/BLK/GHRL/PRKCE/RPH3AL/C2CD2L/SIRT3     |

|                    |            |                                                       |         |           |           |           |           |    |                                                                                                                                              |
|--------------------|------------|-------------------------------------------------------|---------|-----------|-----------|-----------|-----------|----|----------------------------------------------------------------------------------------------------------------------------------------------|
| Biological Process | GO:0071478 | cellular response to radiation                        | 24/2279 | 188/18866 | 0.4189591 | 0.6570701 | 0.5945403 | 24 | BLM/PDE6A/SPIDR/MFAP4/CRB1/PIK3R1/BMF/DNM2/HUS1/CDC25A/AQP1/CREBBP/TP53BP1/GRK7/RHNO1/CHEK2/NEDD4/ERCC1/CRIP1/BCL2L1/POLD3/XPA/EEF1D/MAP3K20 |
| Biological Process | GO:1903350 | response to dopamine                                  | 12/2279 | 91/18866  | 0.419604  | 0.6579729 | 0.5953572 | 12 | KLF16/DNM2/HRH1/HTR3A/GNA11/CHRM2/PALM/ARRB2/GNG2/GNAO1/DTNBP1/PRKN                                                                          |
| Biological Process | GO:0001953 | negative regulation of cell-matrix adhesion           | 6/2279  | 43/18866  | 0.4201446 | 0.6582773 | 0.5956327 | 6  | ITGB1BP1/PIK3R1/DUSP22/THBS1/NF1/CORO1C                                                                                                      |
| Biological Process | GO:0017158 | regulation of calcium ion-dependent exocytosis        | 6/2279  | 43/18866  | 0.4201446 | 0.6582773 | 0.5956327 | 6  | RAP1B/GNAI2/NOTCH1/SYT17/RPH3AL/CBARP                                                                                                        |
| Biological Process | GO:0046717 | acid secretion                                        | 6/2279  | 43/18866  | 0.4201446 | 0.6582773 | 0.5956327 | 6  | SLC51A/SGK1/NF1/AGXT/GHRL/KCNQ1                                                                                                              |
| Biological Process | GO:0071364 | cellular response to epidermal growth factor stimulus | 6/2279  | 43/18866  | 0.4201446 | 0.6582773 | 0.5956327 | 6  | DUSP22/BAIAP2/PAX2/DUSP3/PLCG1/MARS1                                                                                                         |
| Biological Process | GO:2000648 | positive regulation of stem cell proliferation        | 6/2279  | 43/18866  | 0.4201446 | 0.6582773 | 0.5956327 | 6  | DISC1/PTPRC/ZNF335/NOTCH1/KAT7/CX3CR1                                                                                                        |
| Biological Process | GO:0006695 | cholesterol biosynthetic process                      | 10/2279 | 75/18866  | 0.420817  | 0.6588672 | 0.5961664 | 10 | IDI1/MBTPS1/ABCG1/POR/ACACB/ACACA/HMGCS1/SCD/SREBF1/PRKAA1                                                                                   |
| Biological Process | GO:1901983 | regulation of protein acetylation                     | 10/2279 | 75/18866  | 0.420817  | 0.6588672 | 0.5961664 | 10 | ARRB1/RPS6KA4/SPHK2/CTBP1/ARNTL/PIH1D1/KAT7/LIF/PAXIP1/PRKAA1                                                                                |

|                    |            |                                                                                              |         |          |           |           |           |    |                                                            |
|--------------------|------------|----------------------------------------------------------------------------------------------|---------|----------|-----------|-----------|-----------|----|------------------------------------------------------------|
| Biological Process | GO:1902653 | secondary alcohol biosynthetic process                                                       | 10/2279 | 75/18866 | 0.420817  | 0.6588672 | 0.5961664 | 10 | IDI1/MBTPS1/ABCG1/POR/ACACB/ACACA/HMGCS1/SCD/SREBF1/PRKAA1 |
| Biological Process | GO:0030490 | maturation of SSU-rRNA                                                                       | 7/2279  | 51/18866 | 0.421008  | 0.6588672 | 0.5961664 | 7  | RCL1/WDR46/NOB1/NOP14/ERCC2/RIOK1/UTP4                     |
| Biological Process | GO:0045103 | intermediate filament-based process                                                          | 7/2279  | 51/18866 | 0.421008  | 0.6588672 | 0.5961664 | 7  | KRT17/PKP1/NEFM/DNAJB6/GFAP/NDEL1/PPL                      |
| Biological Process | GO:0048146 | positive regulation of fibroblast proliferation                                              | 7/2279  | 51/18866 | 0.421008  | 0.6588672 | 0.5961664 | 7  | MYB/ZMIZ1/AQP1/PDGFD/PDGFB/PDGFC/PDGFRB                    |
| Biological Process | GO:1903587 | regulation of blood vessel endothelial cell proliferation involved in sprouting angiogenesis | 7/2279  | 51/18866 | 0.421008  | 0.6588672 | 0.5961664 | 7  | MIR101-2/THBS1/MIR24-2/MIR27A/MIR23A/AGTR1/PPP1R16B        |
| Biological Process | GO:0009166 | nucleotide catabolic process                                                                 | 9/2279  | 67/18866 | 0.4211792 | 0.6588672 | 0.5961664 | 9  | PDE4D/AMPD3/NUDT3/ACOT7/UNG/NTHL1/PDE9A/PNP/ACAT1          |
| Biological Process | GO:0050918 | positive chemotaxis                                                                          | 9/2279  | 67/18866 | 0.4211792 | 0.6588672 | 0.5961664 | 9  | AZU1/IL16/ANGPT1/SMAD3/CCL5/FPR2/PTPRJ/PDGFB/TSC2          |
| Biological Process | GO:0043525 | positive regulation of neuron apoptotic process                                              | 8/2279  | 59/18866 | 0.4212839 | 0.6588672 | 0.5961664 | 8  | HDAC4/CTSZ/MYB/SRPK2/TNF/NF1/GRN/FIS1                      |
| Biological Process | GO:0048008 | platelet-derived growth factor receptor signaling pathway                                    | 8/2279  | 59/18866 | 0.4212839 | 0.6588672 | 0.5961664 | 8  | ARID5B/FER/PTPRJ/PDGFD/PDGFB/BCR/PDGFC/PDGFRB              |

|                    |            |                                                  |         |           |           |           |           |    |                                                                                                                                                                                                                                                                                                                                                                                         |
|--------------------|------------|--------------------------------------------------|---------|-----------|-----------|-----------|-----------|----|-----------------------------------------------------------------------------------------------------------------------------------------------------------------------------------------------------------------------------------------------------------------------------------------------------------------------------------------------------------------------------------------|
| Biological Process | GO:0098727 | maintenance of cell number                       | 21/2279 | 164/18866 | 0.4227631 | 0.6610718 | 0.5981612 | 21 | FOXP1/TRIM8/LSM1/MIR145/WDR43/SKI/POLR2F/LBH/DLL1/RBPJ/PAX2/KDM4C/PRDM16/ESRRB/NOTCH1/ZHX2/DIS3L2/FOXO1/NODAL/LIF/ZNF706                                                                                                                                                                                                                                                                |
| Biological Process | GO:0045165 | cell fate commitment                             | 35/2279 | 278/18866 | 0.423791  | 0.6625701 | 0.599517  | 35 | ZFPM1/PPARG/SUFU/LOXL3/SH3PXD2B/MIAT/MGA/DLL1/RBPJ/TCF7L2/IFRD1/WNT11/PAX2/LY9/FGFR1/ZBTB7B/PAX7/RARA/TGFB11/DSCAML1/WNT5B/RUNX2/FEV/BCL2/TCF3/NOTCH1/MEF2C/NOTCH4/EPAS1/ARHGEF2/CEBPB/CYLD/LMO4/NODAL/NTF4                                                                                                                                                                             |
| Biological Process | GO:0071241 | cellular response to inorganic substance         | 28/2279 | 221/18866 | 0.4239993 | 0.6627795 | 0.5997064 | 28 | TRPM2/CPNE6/BLM/CALR/SPIDR/GSN/CPNE2/CREB1/ITPKB/SLFN14/DNM2/GPLD1/CPNE5/TRAF2/APP/CPNE1/MTF1/CRHBP/AQP1/NFE2L2/CDH1/ADD1/MEF2C/SYT17/FOXO1/SLC41A1/PRKAA1/PRKN                                                                                                                                                                                                                         |
| Biological Process | GO:0006865 | amino acid transport                             | 20/2279 | 156/18866 | 0.4240645 | 0.6627795 | 0.5997064 | 20 | SLC38A4/SLC38A10/SLC11A1/SLC1A5/SLC15A4/LRRC8C/PPFIA1/SLC43A2/NF1/SLC1A2/SLC7A7/SLC7A5/SFXN1/SLC1A6/PER2/SLC36A3/SLC1A3/SLC43A1/SLC7A8/SLC7A1                                                                                                                                                                                                                                           |
| Biological Process | GO:0042476 | odontogenesis                                    | 17/2279 | 132/18866 | 0.4280689 | 0.668928  | 0.6052698 | 17 | BSG/CSF3R/SLC24A4/ANKRD11/NFIC/ALPL/HDAC1/AQP1/PERP/MYO5A/RUNX2/TSPEAR/AQP3/FOXO1/FAM20C/INHBA/NECTIN1                                                                                                                                                                                                                                                                                  |
| Biological Process | GO:0010498 | proteasomal protein catabolic process            | 60/2279 | 483/18866 | 0.4286975 | 0.6698002 | 0.606059  | 60 | TRIM39/MAEA/RNF144A/FZR1/RNF19A/TRIM38/WWP2/CSNK1D/AMFR/ARRB1/RHBDD2/CBFA2T3/UBAC2/CUL3/EDEM1/HM13/CDC16/DERL2/CLU/SMAD7/UBE2J2/PPP2R5C/SMURF1/MTA1/POMT2/CLEC16A/WWTR1/FBXL19/EDEM2/CSNK1E/PSMF1/FBXL13/UBXN11/KCTD2/NFE2L2/ARRB2/ARNTL/FBXL18/RNF144B/PSMB7/MAP1A/FBXL6/GNA12/UBXN2A/NEDD4/ANAPC7/RNF14/TRIB1/HECW2/FBXW11/RNF40/BAG5/GID8/UBXN8/PELI1/PSMD13/SVIP/MARCH6/PRKN/MARCH7 |
| Biological Process | GO:0072330 | monocarboxylic acid biosynthetic process         | 31/2279 | 246/18866 | 0.4294011 | 0.6707331 | 0.6069031 | 31 | PRKAG2/MGLL/DSE/DHRS9/LIPC/AMACR/AKR1D1/OSBPL6/PRKAB1/ACOT7/ACSS1/RDH10/MYO5A/NR1H2/AGXT/ACACB/ACSS2/ACOX2/HOGA1/PER2/SLC1A3/PKM/ACACA/ACSF3/FA2H/SCD/WDTC1/ALDH1A2/ACADVL/PRKAA1/PRXL2B                                                                                                                                                                                                |
| Biological Process | GO:0010633 | negative regulation of epithelial cell migration | 16/2279 | 124/18866 | 0.4294358 | 0.6707331 | 0.6069031 | 16 | TACSTD2/PPARG/ITGB1BP1/MIR199A1/TNF/MIR101-2/JUP/THBS1/MIR24-2/TGFB1/VASH1/MIR199A2/NOTCH1/CORO1C/MEF2C/SP100                                                                                                                                                                                                                                                                           |
| Biological Process | GO:0007369 | gastrulation                                     | 24/2279 | 189/18866 | 0.4296761 | 0.6709981 | 0.6071429 | 24 | IL10/MIR145/LRP5L/SETD2/SMAD3/COL4A2/TGFBR2/CUL3/MBP/ZBTB17/COL12A1/WNT11/PAX2/ITGB5/FGFR1/IL1RN/ITGB3/ITGB2/COL5A1/LAMB3/MYADM/INHBA/NODAL/OTX2                                                                                                                                                                                                                                        |

|                    |            |                                                          |         |           |           |           |           |    |                                                                                                                                                                                              |
|--------------------|------------|----------------------------------------------------------|---------|-----------|-----------|-----------|-----------|----|----------------------------------------------------------------------------------------------------------------------------------------------------------------------------------------------|
| Biological Process | GO:0034249 | negative regulation of cellular amide metabolic process  | 30/2279 | 238/18866 | 0.4308715 | 0.6715429 | 0.6076359 | 30 | SORL1/CALR/MIR145/TNRC6B/ORMDL3/MIR101-2/AGO1/LARP1/ZC3H12D/BIN1/SAMD4A/MIR27A/CLU/AGO2/RARA/CPEB3/IGF2BP3/INPP5E/FTO/PUS7/MIR138-2/CELF1/NOTCH4/BANK1/ILF3/SYSCRIP/EIF4G1/DAPK3/PRKAA1/SHFL |
| Biological Process | GO:0032508 | DNA duplex unwinding                                     | 14/2279 | 108/18866 | 0.4322104 | 0.6715429 | 0.6076359 | 14 | BLM/RTEL1/MCM5/WRNIP1/RECQL5/IGHMBP2/MCM2/SMARCAL1/CHD9/CHD8/RUVBL1/XPA/ERCC2/FBH1                                                                                                           |
| Biological Process | GO:0044774 | mitotic DNA integrity checkpoint                         | 14/2279 | 108/18866 | 0.4322104 | 0.6715429 | 0.6076359 | 14 | TRIM39/BLM/TFDP1/FOXN3/HUS1/E2F7/PCBP4/EME1/ZNF385A/ARID3A/TAOK3/CLSPN/CHEK2/NAE1                                                                                                            |
| Biological Process | GO:1902750 | negative regulation of cell cycle G2/M phase transition  | 14/2279 | 108/18866 | 0.4322104 | 0.6715429 | 0.6076359 | 14 | TRIM39/BLM/FZR1/FOXN3/HUS1/PSMF1/TAOK3/ZFYVE19/CLSPN/PSMB7/NAE1/PSMD13/ABRAXAS1/BABAM2                                                                                                       |
| Biological Process | GO:0050953 | sensory perception of light stimulus                     | 28/2279 | 222/18866 | 0.4339051 | 0.6715429 | 0.6076359 | 28 | RCVRN/TACSTD2/PDE6A/CACNA2D4/OPA3/CRB1/TGFBI/CDH23/TULP2/CCDC66/GNAT2/PAX2/PITPNA/CDH3/RDH10/NOB1/MYO5A/CRYBB1/PDE6H/RPGRIP1/CABP1/EPAS1/GRK7/NRL/ABLIM1/EYS/KIFC3/CABP4                     |
| Biological Process | GO:0000727 | double-strand break repair via break-induced replication | 2/2279  | 12/18866  | 0.4349726 | 0.6715429 | 0.6076359 | 2  | MCM5/MCM2                                                                                                                                                                                    |
| Biological Process | GO:0002517 | T cell tolerance induction                               | 2/2279  | 12/18866  | 0.4349726 | 0.6715429 | 0.6076359 | 2  | PHLPP1/TGFBR2                                                                                                                                                                                |
| Biological Process | GO:0002730 | regulation of dendritic cell cytokine production         | 2/2279  | 12/18866  | 0.4349726 | 0.6715429 | 0.6076359 | 2  | SCIMP/NOD2                                                                                                                                                                                   |
| Biological Process | GO:0003207 | cardiac chamber formation                                | 2/2279  | 12/18866  | 0.4349726 | 0.6715429 | 0.6076359 | 2  | NOTCH1/MEF2C                                                                                                                                                                                 |

|                    |            |                                              |        |          |           |           |           |   |                |
|--------------------|------------|----------------------------------------------|--------|----------|-----------|-----------|-----------|---|----------------|
| Biological Process | GO:0003353 | positive regulation of cilium movement       | 2/2279 | 12/18866 | 0.4349726 | 0.6715429 | 0.6076359 | 2 | RNASE10/DEFB1  |
| Biological Process | GO:0006554 | lysine catabolic process                     | 2/2279 | 12/18866 | 0.4349726 | 0.6715429 | 0.6076359 | 2 | OGDH/CRYM      |
| Biological Process | GO:0009071 | serine family amino acid catabolic process   | 2/2279 | 12/18866 | 0.4349726 | 0.6715429 | 0.6076359 | 2 | CBS/AGXT       |
| Biological Process | GO:0009086 | methionine biosynthetic process              | 2/2279 | 12/18866 | 0.4349726 | 0.6715429 | 0.6076359 | 2 | MTHFD1/ADI1    |
| Biological Process | GO:0009151 | purine deoxyribonucleotide metabolic process | 2/2279 | 12/18866 | 0.4349726 | 0.6715429 | 0.6076359 | 2 | GUK1/AK5       |
| Biological Process | GO:0010232 | vascular transport                           | 2/2279 | 12/18866 | 0.4349726 | 0.6715429 | 0.6076359 | 2 | MFSD2A/ABCC2   |
| Biological Process | GO:0010960 | magnesium ion homeostasis                    | 2/2279 | 12/18866 | 0.4349726 | 0.6715429 | 0.6076359 | 2 | CNNM2/SLC41A1  |
| Biological Process | GO:0014745 | negative regulation of muscle adaptation     | 2/2279 | 12/18866 | 0.4349726 | 0.6715429 | 0.6076359 | 2 | SMAD3/FOXO1    |
| Biological Process | GO:0015824 | proline transport                            | 2/2279 | 12/18866 | 0.4349726 | 0.6715429 | 0.6076359 | 2 | SLC36A3/SLC7A8 |

|                    |            |                                                           |        |          |           |           |           |   |                 |
|--------------------|------------|-----------------------------------------------------------|--------|----------|-----------|-----------|-----------|---|-----------------|
| Biological Process | GO:0021702 | cerebellar Purkinje cell differentiation                  | 2/2279 | 12/18866 | 0.4349726 | 0.6715429 | 0.6076359 | 2 | TTC21B/TLL1     |
| Biological Process | GO:0021903 | rostrocaudal neural tube patterning                       | 2/2279 | 12/18866 | 0.4349726 | 0.6715429 | 0.6076359 | 2 | SSBP3/HES3      |
| Biological Process | GO:0030157 | pancreatic juice secretion                                | 2/2279 | 12/18866 | 0.4349726 | 0.6715429 | 0.6076359 | 2 | AQP1/NR1H2      |
| Biological Process | GO:0030259 | lipid glycosylation                                       | 2/2279 | 12/18866 | 0.4349726 | 0.6715429 | 0.6076359 | 2 | ST3GAL4/ST3GAL2 |
| Biological Process | GO:0031581 | hemidesmosome assembly                                    | 2/2279 | 12/18866 | 0.4349726 | 0.6715429 | 0.6076359 | 2 | COL17A1/LAMB3   |
| Biological Process | GO:0033629 | negative regulation of cell adhesion mediated by integrin | 2/2279 | 12/18866 | 0.4349726 | 0.6715429 | 0.6076359 | 2 | JAM3/PDE3B      |
| Biological Process | GO:0033700 | phospholipid efflux                                       | 2/2279 | 12/18866 | 0.4349726 | 0.6715429 | 0.6076359 | 2 | ABCG1/ABCA1     |
| Biological Process | GO:0034397 | telomere localization                                     | 2/2279 | 12/18866 | 0.4349726 | 0.6715429 | 0.6076359 | 2 | RAD21L1/TERB2   |
| Biological Process | GO:0034497 | protein localization to phagophore assembly site          | 2/2279 | 12/18866 | 0.4349726 | 0.6715429 | 0.6076359 | 2 | PACS2/WIP1      |

|                    |            |                                                               |        |          |           |           |           |   |                |
|--------------------|------------|---------------------------------------------------------------|--------|----------|-----------|-----------|-----------|---|----------------|
| Biological Process | GO:0035404 | histone-serine phosphorylation                                | 2/2279 | 12/18866 | 0.4349726 | 0.6715429 | 0.6076359 | 2 | RPS6KA4/PRKAA1 |
| Biological Process | GO:0038063 | collagen-activated tyrosine kinase receptor signaling pathway | 2/2279 | 12/18866 | 0.4349726 | 0.6715429 | 0.6076359 | 2 | COL4A2/UBASH3B |
| Biological Process | GO:0038110 | interleukin-2-mediated signaling pathway                      | 2/2279 | 12/18866 | 0.4349726 | 0.6715429 | 0.6076359 | 2 | STAT5A/JAK1    |
| Biological Process | GO:0042340 | keratan sulfate catabolic process                             | 2/2279 | 12/18866 | 0.4349726 | 0.6715429 | 0.6076359 | 2 | HEXB/GALNS     |
| Biological Process | GO:0042492 | gamma-delta T cell differentiation                            | 2/2279 | 12/18866 | 0.4349726 | 0.6715429 | 0.6076359 | 2 | CCR9/PTPRC     |
| Biological Process | GO:0043383 | negative T cell selection                                     | 2/2279 | 12/18866 | 0.4349726 | 0.6715429 | 0.6076359 | 2 | PTPRC/DOCK2    |
| Biological Process | GO:0043476 | pigment accumulation                                          | 2/2279 | 12/18866 | 0.4349726 | 0.6715429 | 0.6076359 | 2 | SHROOM3/AP3D1  |
| Biological Process | GO:0043482 | cellular pigment accumulation                                 | 2/2279 | 12/18866 | 0.4349726 | 0.6715429 | 0.6076359 | 2 | SHROOM3/AP3D1  |
| Biological Process | GO:0044650 | adhesion of symbiont to host cell                             | 2/2279 | 12/18866 | 0.4349726 | 0.6715429 | 0.6076359 | 2 | SFTPD/NECTIN1  |



|                    |            |                                                                        |        |          |           |           |           |   |                 |
|--------------------|------------|------------------------------------------------------------------------|--------|----------|-----------|-----------|-----------|---|-----------------|
| Biological Process | GO:0045144 | meiotic sister chromatid segregation                                   | 2/2279 | 12/18866 | 0.4349726 | 0.6715429 | 0.6076359 | 2 | PPP2R1A/RAD21L1 |
| Biological Process | GO:0045161 | neuronal ion channel clustering                                        | 2/2279 | 12/18866 | 0.4349726 | 0.6715429 | 0.6076359 | 2 | SPTBN4/GLDN     |
| Biological Process | GO:0046185 | aldehyde catabolic process                                             | 2/2279 | 12/18866 | 0.4349726 | 0.6715429 | 0.6076359 | 2 | AGXT/HOGA1      |
| Biological Process | GO:0048148 | behavioral response to cocaine                                         | 2/2279 | 12/18866 | 0.4349726 | 0.6715429 | 0.6076359 | 2 | PPP1R1B/FADD    |
| Biological Process | GO:0051177 | meiotic sister chromatid cohesion                                      | 2/2279 | 12/18866 | 0.4349726 | 0.6715429 | 0.6076359 | 2 | PPP2R1A/RAD21L1 |
| Biological Process | GO:0051340 | regulation of ligase activity                                          | 2/2279 | 12/18866 | 0.4349726 | 0.6715429 | 0.6076359 | 2 | RIPK3/TFIP11    |
| Biological Process | GO:0060081 | membrane hyperpolarization                                             | 2/2279 | 12/18866 | 0.4349726 | 0.6715429 | 0.6076359 | 2 | PRKCZ/KCTD7     |
| Biological Process | GO:0060394 | negative regulation of pathway-restricted SMAD protein phosphorylation | 2/2279 | 12/18866 | 0.4349726 | 0.6715429 | 0.6076359 | 2 | LDLRAD4/SMAD7   |
| Biological Process | GO:0060453 | regulation of gastric acid secretion                                   | 2/2279 | 12/18866 | 0.4349726 | 0.6715429 | 0.6076359 | 2 | SGK1/KCNQ1      |

|                    |            |                                                                        |        |          |           |           |           |   |              |
|--------------------|------------|------------------------------------------------------------------------|--------|----------|-----------|-----------|-----------|---|--------------|
| Biological Process | GO:0060742 | epithelial cell differentiation involved in prostate gland development | 2/2279 | 12/18866 | 0.4349726 | 0.6715429 | 0.6076359 | 2 | RXRA/NOTCH1  |
| Biological Process | GO:0061517 | macrophage proliferation                                               | 2/2279 | 12/18866 | 0.4349726 | 0.6715429 | 0.6076359 | 2 | CSF1R/CLU    |
| Biological Process | GO:0070202 | regulation of establishment of protein localization to chromosome      | 2/2279 | 12/18866 | 0.4349726 | 0.6715429 | 0.6076359 | 2 | SPDR/CCT6A   |
| Biological Process | GO:0070243 | regulation of thymocyte apoptotic process                              | 2/2279 | 12/18866 | 0.4349726 | 0.6715429 | 0.6076359 | 2 | PTCRA/ZC3H8  |
| Biological Process | GO:0070269 | pyroptosis                                                             | 2/2279 | 12/18866 | 0.4349726 | 0.6715429 | 0.6076359 | 2 | NLRC4/AIM2   |
| Biological Process | GO:0070493 | thrombin-activated receptor signaling pathway                          | 2/2279 | 12/18866 | 0.4349726 | 0.6715429 | 0.6076359 | 2 | DGKQ/F2R     |
| Biological Process | GO:0070572 | positive regulation of neuron projection regeneration                  | 2/2279 | 12/18866 | 0.4349726 | 0.6715429 | 0.6076359 | 2 | GRN/NDEL1    |
| Biological Process | GO:0071107 | response to parathyroid hormone                                        | 2/2279 | 12/18866 | 0.4349726 | 0.6715429 | 0.6076359 | 2 | HDAC4/MEF2C  |
| Biological Process | GO:0071481 | cellular response to X-ray                                             | 2/2279 | 12/18866 | 0.4349726 | 0.6715429 | 0.6076359 | 2 | DNM2/TP53BP1 |

|                    |            |                                                                                           |        |          |           |           |           |   |               |
|--------------------|------------|-------------------------------------------------------------------------------------------|--------|----------|-----------|-----------|-----------|---|---------------|
| Biological Process | GO:0072017 | distal tubule development                                                                 | 2/2279 | 12/18866 | 0.4349726 | 0.6715429 | 0.6076359 | 2 | PAX2/NOTCH1   |
| Biological Process | GO:0072393 | microtubule anchoring at microtubule organizing center                                    | 2/2279 | 12/18866 | 0.4349726 | 0.6715429 | 0.6076359 | 2 | DCTN1/BICD2   |
| Biological Process | GO:0072540 | T-helper 17 cell lineage commitment                                                       | 2/2279 | 12/18866 | 0.4349726 | 0.6715429 | 0.6076359 | 2 | LOXL3/LY9     |
| Biological Process | GO:0072711 | cellular response to hydroxyurea                                                          | 2/2279 | 12/18866 | 0.4349726 | 0.6715429 | 0.6076359 | 2 | BLM/SPIDR     |
| Biological Process | GO:0086067 | AV node cell to bundle of His cell communication                                          | 2/2279 | 12/18866 | 0.4349726 | 0.6715429 | 0.6076359 | 2 | CACNA1C/GJA5  |
| Biological Process | GO:0090209 | negative regulation of triglyceride metabolic process                                     | 2/2279 | 12/18866 | 0.4349726 | 0.6715429 | 0.6076359 | 2 | SORL1/GPLD1   |
| Biological Process | GO:0090220 | chromosome localization to nuclear envelope involved in homologous chromosome segregation | 2/2279 | 12/18866 | 0.4349726 | 0.6715429 | 0.6076359 | 2 | RAD21L1/TERB2 |
| Biological Process | GO:0090331 | negative regulation of platelet aggregation                                               | 2/2279 | 12/18866 | 0.4349726 | 0.6715429 | 0.6076359 | 2 | CD9/UBASH3B   |
| Biological Process | GO:0097104 | postsynaptic membrane assembly                                                            | 2/2279 | 12/18866 | 0.4349726 | 0.6715429 | 0.6076359 | 2 | NRXN1/NRXN2   |

|                    |            |                                                                                |         |           |           |           |           |    |                                                                                                                                                                  |
|--------------------|------------|--------------------------------------------------------------------------------|---------|-----------|-----------|-----------|-----------|----|------------------------------------------------------------------------------------------------------------------------------------------------------------------|
| Biological Process | GO:0150065 | regulation of deacetylase activity                                             | 2/2279  | 12/18866  | 0.4349726 | 0.6715429 | 0.6076359 | 2  | C6orf89/SPHK2                                                                                                                                                    |
| Biological Process | GO:1901503 | ether biosynthetic process                                                     | 2/2279  | 12/18866  | 0.4349726 | 0.6715429 | 0.6076359 | 2  | CHPT1/PEDS1                                                                                                                                                      |
| Biological Process | GO:1903332 | regulation of protein folding                                                  | 2/2279  | 12/18866  | 0.4349726 | 0.6715429 | 0.6076359 | 2  | GRN/BAG5                                                                                                                                                         |
| Biological Process | GO:1904465 | negative regulation of matrix metalloproteinase secretion                      | 2/2279  | 12/18866  | 0.4349726 | 0.6715429 | 0.6076359 | 2  | MIR199A1/MIR199A2                                                                                                                                                |
| Biological Process | GO:1904953 | Wnt signaling pathway involved in midbrain dopaminergic neuron differentiation | 2/2279  | 12/18866  | 0.4349726 | 0.6715429 | 0.6076359 | 2  | CSNK1D/CSNK1E                                                                                                                                                    |
| Biological Process | GO:2000105 | positive regulation of DNA-dependent DNA replication                           | 2/2279  | 12/18866  | 0.4349726 | 0.6715429 | 0.6076359 | 2  | E2F7/FGFR1                                                                                                                                                       |
| Biological Process | GO:2001214 | positive regulation of vasculogenesis                                          | 2/2279  | 12/18866  | 0.4349726 | 0.6715429 | 0.6076359 | 2  | RIN2/RAPGEF2                                                                                                                                                     |
| Biological Process | GO:0042594 | response to starvation                                                         | 26/2279 | 206/18866 | 0.4370763 | 0.6746811 | 0.6104754 | 26 | FOXK1/RPTOR/PRKAG2/PPARG/MFSD2A/ULK1/WIPI2/LARP1/COMT/EHMT2/STK24/CLEC16A/ATG14/NFE2L2/BCL2/HMGCL/PCK2/SLC2A1/FOXO1/ACAT1/SREBF1/DHODH/NPRL2/PRKAA1/MARS1/RIPOR1 |
| Biological Process | GO:0008306 | associative learning                                                           | 10/2279 | 76/18866  | 0.4378111 | 0.6755958 | 0.6113031 | 10 | CREB1/PPP1R1B/TANC1/APP/SYNGAP1/HRH1/NF1/MEIS2/MAP1A/SYNPO                                                                                                       |

|                    |            |                                                            |         |          |           |           |           |    |                                                                 |
|--------------------|------------|------------------------------------------------------------|---------|----------|-----------|-----------|-----------|----|-----------------------------------------------------------------|
| Biological Process | GO:0033555 | multicellular organismal response to stress                | 10/2279 | 76/18866 | 0.4378111 | 0.6755958 | 0.6113031 | 10 | THBS1/COMT/ASIC4/MAPK8IP2/NTRK1/BCL2/MEF2C/MORC1/CACNA1B/EIF4G1 |
| Biological Process | GO:0002753 | cytoplasmic pattern recognition receptor signaling pathway | 9/2279  | 68/18866 | 0.4391662 | 0.6759464 | 0.6116203 | 9  | MAP2K6/TNFAIP3/PHB/UBE2V1/SEC14L1/IRAK2/NOD2/CYLD/RELA          |
| Biological Process | GO:1902369 | negative regulation of RNA catabolic process               | 9/2279  | 68/18866 | 0.4391662 | 0.6759464 | 0.6116203 | 9  | SLC11A1/LARP1/PKP1/NBAS/PAIP1/SECISBP2/SYNCRIP/TENT5C/TENT5A    |
| Biological Process | GO:0007602 | phototransduction                                          | 8/2279  | 60/18866 | 0.4404586 | 0.6759464 | 0.6116203 | 8  | RCVRN/PDE6A/ARRB1/PITPNM1/GNAT2/GNA11/GRK7/CABP4                |
| Biological Process | GO:0018208 | peptidyl-proline modification                              | 8/2279  | 60/18866 | 0.4404586 | 0.6759464 | 0.6116203 | 8  | P4HB/FKBP5/AIP/P4HA2/NTMT1/P3H3/PTPA/P3H1                       |
| Biological Process | GO:0032653 | regulation of interleukin-10 production                    | 8/2279  | 60/18866 | 0.4404586 | 0.6759464 | 0.6116203 | 8  | PRKCZ/MIR145/TLR9/DLL1/TNFRSF21/TIGIT/NOD2/VSIR                 |
| Biological Process | GO:0043388 | positive regulation of DNA binding                         | 8/2279  | 60/18866 | 0.4404586 | 0.6759464 | 0.6116203 | 8  | PPARG/SKI/HIPK2/TGFB1/RB1/CDCA5/ERCC2/PRKN                      |
| Biological Process | GO:0048747 | muscle fiber development                                   | 8/2279  | 60/18866 | 0.4404586 | 0.6759464 | 0.6116203 | 8  | HDAC4/MYO18B/TTN/MYH11/SKI/BCL2/DYSF/MYORG                      |
| Biological Process | GO:0061900 | glial cell activation                                      | 8/2279  | 60/18866 | 0.4404586 | 0.6759464 | 0.6116203 | 8  | AZU1/TNF/FPR2/APP/CLU/PTPRC/GRN/ITGB2                           |

|                    |            |                                                          |        |          |           |           |           |   |                                                    |
|--------------------|------------|----------------------------------------------------------|--------|----------|-----------|-----------|-----------|---|----------------------------------------------------|
| Biological Process | GO:0061951 | establishment of protein localization to plasma membrane | 8/2279 | 60/18866 | 0.4404586 | 0.6759464 | 0.6116203 | 8 | KIF13A/RAB31/ZDHHC2/AKAP5/VAMP5/CSK/GORASP2/RILPL1 |
| Biological Process | GO:0001911 | negative regulation of leukocyte mediated cytotoxicity   | 3/2279 | 20/18866 | 0.4413878 | 0.6759464 | 0.6116203 | 3 | HLA-F/PTPRC/ARRB2                                  |
| Biological Process | GO:0006144 | purine nucleobase metabolic process                      | 3/2279 | 20/18866 | 0.4413878 | 0.6759464 | 0.6116203 | 3 | GMPR2/AOX1/ACP3                                    |
| Biological Process | GO:0006346 | DNA methylation-dependent heterochromatin assembly       | 3/2279 | 20/18866 | 0.4413878 | 0.6759464 | 0.6116203 | 3 | HDAC1/ATF7IP/DNMT1                                 |
| Biological Process | GO:0006525 | arginine metabolic process                               | 3/2279 | 20/18866 | 0.4413878 | 0.6759464 | 0.6116203 | 3 | FAH/SLC7A7/ART4                                    |
| Biological Process | GO:0006743 | ubiquinone metabolic process                             | 3/2279 | 20/18866 | 0.4413878 | 0.6759464 | 0.6116203 | 3 | AIFM2/COQ4/COQ8B                                   |
| Biological Process | GO:0009168 | purine ribonucleoside monophosphate biosynthetic process | 3/2279 | 20/18866 | 0.4413878 | 0.6759464 | 0.6116203 | 3 | AMPD3/LHPP/IMPDH1                                  |
| Biological Process | GO:0015669 | gas transport                                            | 3/2279 | 20/18866 | 0.4413878 | 0.6759464 | 0.6116203 | 3 | HBB/AQP1/MB                                        |
| Biological Process | GO:0031290 | retinal ganglion cell axon guidance                      | 3/2279 | 20/18866 | 0.4413878 | 0.6759464 | 0.6116203 | 3 | EPHB3/BMPRI1B/SLIT1                                |

|                    |            |                                                           |        |          |           |           |           |   |                        |
|--------------------|------------|-----------------------------------------------------------|--------|----------|-----------|-----------|-----------|---|------------------------|
| Biological Process | GO:0031498 | chromatin disassembly                                     | 3/2279 | 20/18866 | 0.4413878 | 0.6759464 | 0.6116203 | 3 | PADI2/SMARCD1/SMARCD2  |
| Biological Process | GO:0031998 | regulation of fatty acid beta-oxidation                   | 3/2279 | 20/18866 | 0.4413878 | 0.6759464 | 0.6116203 | 3 | MFSD2A/ACACB/CPT1A     |
| Biological Process | GO:0032727 | positive regulation of interferon-alpha production        | 3/2279 | 20/18866 | 0.4413878 | 0.6759464 | 0.6116203 | 3 | IRF5/SETD2/TLR9        |
| Biological Process | GO:0032793 | positive regulation of CREB transcription factor activity | 3/2279 | 20/18866 | 0.4413878 | 0.6759464 | 0.6116203 | 3 | RPS6KA4/CRTC3/CAMK1D   |
| Biological Process | GO:0042089 | cytokine biosynthetic process                             | 3/2279 | 20/18866 | 0.4413878 | 0.6759464 | 0.6116203 | 3 | CEBPE/IGF2BP3/ASB1     |
| Biological Process | GO:0043555 | regulation of translation in response to stress           | 3/2279 | 20/18866 | 0.4413878 | 0.6759464 | 0.6116203 | 3 | RPS6KA1/NCK2/EIF4G1    |
| Biological Process | GO:0045019 | negative regulation of nitric oxide biosynthetic process  | 3/2279 | 20/18866 | 0.4413878 | 0.6759464 | 0.6116203 | 3 | IL10/MIR199A1/MIR199A2 |
| Biological Process | GO:0048670 | regulation of collateral sprouting                        | 3/2279 | 20/18866 | 0.4413878 | 0.6759464 | 0.6116203 | 3 | IFRD1/SEMA4D/SPART     |
| Biological Process | GO:0051767 | nitric-oxide synthase biosynthetic process                | 3/2279 | 20/18866 | 0.4413878 | 0.6759464 | 0.6116203 | 3 | MAP2K6/TLR9/NOD2       |

|                    |            |                                                                                                   |        |          |           |           |           |   |                                             |
|--------------------|------------|---------------------------------------------------------------------------------------------------|--------|----------|-----------|-----------|-----------|---|---------------------------------------------|
| Biological Process | GO:0051769 | regulation of nitric-oxide synthase biosynthetic process                                          | 3/2279 | 20/18866 | 0.4413878 | 0.6759464 | 0.6116203 | 3 | MAP2K6/TLR9/NOD2                            |
| Biological Process | GO:0071071 | regulation of phospholipid biosynthetic process                                                   | 3/2279 | 20/18866 | 0.4413878 | 0.6759464 | 0.6116203 | 3 | LPCAT1/FPR2/PDGFB                           |
| Biological Process | GO:0097734 | extracellular exosome biogenesis                                                                  | 3/2279 | 20/18866 | 0.4413878 | 0.6759464 | 0.6116203 | 3 | RAB27A/COP55/PRKN                           |
| Biological Process | GO:0098703 | calcium ion import across plasma membrane                                                         | 3/2279 | 20/18866 | 0.4413878 | 0.6759464 | 0.6116203 | 3 | TRPM2/SLC8A1/TRPV2                          |
| Biological Process | GO:1900151 | regulation of nuclear-transcribed mRNA catabolic process, deadenylation-dependent decay           | 3/2279 | 20/18866 | 0.4413878 | 0.6759464 | 0.6116203 | 3 | TNRC6B/AGO2/CPEB3                           |
| Biological Process | GO:1900409 | positive regulation of cellular response to oxidative stress                                      | 3/2279 | 20/18866 | 0.4413878 | 0.6759464 | 0.6116203 | 3 | TNF/RIPK1/SIRT3                             |
| Biological Process | GO:1902236 | negative regulation of endoplasmic reticulum stress-induced intrinsic apoptotic signaling pathway | 3/2279 | 20/18866 | 0.4413878 | 0.6759464 | 0.6116203 | 3 | BCL2L1/GRINA/PRKN                           |
| Biological Process | GO:1904406 | negative regulation of nitric oxide metabolic process                                             | 3/2279 | 20/18866 | 0.4413878 | 0.6759464 | 0.6116203 | 3 | IL10/MIR199A1/MIR199A2                      |
| Biological Process | GO:0000186 | activation of MAPKK activity                                                                      | 7/2279 | 52/18866 | 0.4416388 | 0.6759464 | 0.6116203 | 7 | MAP3K3/TNIK/RIPK1/MAP3K14/NTRK1/F2R/MAP3K20 |



|                    |            |                                                                       |         |           |           |           |           |    |                                                                                                                                                                                                                |
|--------------------|------------|-----------------------------------------------------------------------|---------|-----------|-----------|-----------|-----------|----|----------------------------------------------------------------------------------------------------------------------------------------------------------------------------------------------------------------|
| Biological Process | GO:0001912 | positive regulation of leukocyte mediated cytotoxicity                | 7/2279  | 52/18866  | 0.4416388 | 0.6759464 | 0.6116203 | 7  | CD226/HLA-F/PTPRC/IL18RAP/CADM1/FADD/CYRIB                                                                                                                                                                     |
| Biological Process | GO:0060421 | positive regulation of heart growth                                   | 7/2279  | 52/18866  | 0.4416388 | 0.6759464 | 0.6116203 | 7  | MIR199A1/RBPJ/FGFR1/ACACB/MIR199A2/NOTCH1/MEF2C                                                                                                                                                                |
| Biological Process | GO:0072132 | mesenchyme morphogenesis                                              | 7/2279  | 52/18866  | 0.4416388 | 0.6759464 | 0.6116203 | 7  | SMAD3/TGFBR2/RBPJ/WNT11/FGFR1/ENG/NOTCH1                                                                                                                                                                       |
| Biological Process | GO:0045197 | establishment or maintenance of epithelial cell apical/basal polarity | 6/2279  | 44/18866  | 0.442619  | 0.6759464 | 0.6116203 | 6  | CRB1/ILK/WNT11/WDR1/PRKCI/MARK2                                                                                                                                                                                |
| Biological Process | GO:0045910 | negative regulation of DNA recombination                              | 6/2279  | 44/18866  | 0.442619  | 0.6759464 | 0.6116203 | 6  | BLM/RMI2/RTEL1/RECQL5/TP53BP1/FBH1                                                                                                                                                                             |
| Biological Process | GO:0097028 | dendritic cell differentiation                                        | 6/2279  | 44/18866  | 0.442619  | 0.6759464 | 0.6116203 | 6  | TRPM2/PRTN3/TGFBR2/RBPJ/BLK/CEBPB                                                                                                                                                                              |
| Biological Process | GO:0098813 | nuclear chromosome segregation                                        | 34/2279 | 272/18866 | 0.4431094 | 0.6759464 | 0.6116203 | 34 | MAD1L1/TTN/TNKS/RMI2/NSMCE2/DYNC1H1/CHAMP1/CUL3/EME1/MEIOB/CDC16/MIS12/DCTN2/RNF212/TACC3/STAG1/NUMA1/PPP2R1A/MSTO1/NEK6/RB1/RAD21L1/DMC1/CDCA5/DIS3L2/ANAPC7/SPAG5/HECW2/SLX4/TEX12/PCID2/TERB2/ABRAXAS1/SLF1 |
| Biological Process | GO:0001916 | positive regulation of T cell mediated cytotoxicity                   | 4/2279  | 28/18866  | 0.443121  | 0.6759464 | 0.6116203 | 4  | HLA-F/PTPRC/FADD/CYRIB                                                                                                                                                                                         |
| Biological Process | GO:0006760 | folic acid-containing compound metabolic process                      | 4/2279  | 28/18866  | 0.443121  | 0.6759464 | 0.6116203 | 4  | MTHFD1L/MTHFS/SLC19A1/MTHFD1                                                                                                                                                                                   |

|                    |            |                                                                      |        |          |          |           |           |   |                           |
|--------------------|------------|----------------------------------------------------------------------|--------|----------|----------|-----------|-----------|---|---------------------------|
| Biological Process | GO:0006929 | substrate-dependent cell migration                                   | 4/2279 | 28/18866 | 0.443121 | 0.6759464 | 0.6116203 | 4 | ITGB1BP1/CTTN/FMNL1/PTPRC |
| Biological Process | GO:0009074 | aromatic amino acid family catabolic process                         | 4/2279 | 28/18866 | 0.443121 | 0.6759464 | 0.6116203 | 4 | HAL/HGD/FAH/HNMT          |
| Biological Process | GO:0010575 | positive regulation of vascular endothelial growth factor production | 4/2279 | 28/18866 | 0.443121 | 0.6759464 | 0.6116203 | 4 | C3AR1/TGFB1/CXCL17/NODAL  |
| Biological Process | GO:0010669 | epithelial structure maintenance                                     | 4/2279 | 28/18866 | 0.443121 | 0.6759464 | 0.6116203 | 4 | PIWIL4/TLR9/SLC22A5/NOD2  |
| Biological Process | GO:0010818 | T cell chemotaxis                                                    | 4/2279 | 28/18866 | 0.443121 | 0.6759464 | 0.6116203 | 4 | PIK3CD/CCR2/CCL5/CCL27    |
| Biological Process | GO:0021680 | cerebellar Purkinje cell layer development                           | 4/2279 | 28/18866 | 0.443121 | 0.6759464 | 0.6116203 | 4 | DLL1/TTC21B/TLL1/COQ8B    |
| Biological Process | GO:0021846 | cell proliferation in forebrain                                      | 4/2279 | 28/18866 | 0.443121 | 0.6759464 | 0.6116203 | 4 | ZEB2/DISC1/FGFR1/NUMB     |
| Biological Process | GO:0031069 | hair follicle morphogenesis                                          | 4/2279 | 28/18866 | 0.443121 | 0.6759464 | 0.6116203 | 4 | KRT17/BCL2/NOTCH1/TGM3    |
| Biological Process | GO:0032958 | inositol phosphate biosynthetic process                              | 4/2279 | 28/18866 | 0.443121 | 0.6759464 | 0.6116203 | 4 | ITPKB/P2RY6/HRH1/IP6K1    |

|                    |            |                                                                      |        |          |          |           |           |   |                                   |
|--------------------|------------|----------------------------------------------------------------------|--------|----------|----------|-----------|-----------|---|-----------------------------------|
| Biological Process | GO:0033598 | mammary gland epithelial cell proliferation                          | 4/2279 | 28/18866 | 0.443121 | 0.6759464 | 0.6116203 | 4 | RREB1/BRCA2/RTN4/CEBPB            |
| Biological Process | GO:0035883 | enteroendocrine cell differentiation                                 | 4/2279 | 28/18866 | 0.443121 | 0.6759464 | 0.6116203 | 4 | RHEB/RFX3/DLL1/ARNTL              |
| Biological Process | GO:0042044 | fluid transport                                                      | 4/2279 | 28/18866 | 0.443121 | 0.6759464 | 0.6116203 | 4 | ITPR1/AQP1/AQP3/AQP9              |
| Biological Process | GO:0043901 | negative regulation of multi-organism process                        | 4/2279 | 28/18866 | 0.443121 | 0.6759464 | 0.6116203 | 4 | CALR/ARHGDI1/NPPC/NODAL           |
| Biological Process | GO:0060143 | positive regulation of syncytium formation by plasma membrane fusion | 4/2279 | 28/18866 | 0.443121 | 0.6759464 | 0.6116203 | 4 | EHD1/NFATC2/FLOT1/SCGB3A1         |
| Biological Process | GO:0060512 | prostate gland morphogenesis                                         | 4/2279 | 28/18866 | 0.443121 | 0.6759464 | 0.6116203 | 4 | RXRA/RARG/NOTCH1/CRIP1            |
| Biological Process | GO:0090383 | phagosome acidification                                              | 4/2279 | 28/18866 | 0.443121 | 0.6759464 | 0.6116203 | 4 | ATP6V1B2/ATP6V0B/ATP6V0C/ATP6V1C1 |
| Biological Process | GO:1900101 | regulation of endoplasmic reticulum unfolded protein response        | 4/2279 | 28/18866 | 0.443121 | 0.6759464 | 0.6116203 | 4 | ERN1/PIK3R1/NCK2/COP55            |
| Biological Process | GO:1902668 | negative regulation of axon guidance                                 | 4/2279 | 28/18866 | 0.443121 | 0.6759464 | 0.6116203 | 4 | SEMA6B/SEMA4A/SEMA4B/SEMA4D       |

|                    |            |                                                                                  |        |          |           |           |           |   |                                |
|--------------------|------------|----------------------------------------------------------------------------------|--------|----------|-----------|-----------|-----------|---|--------------------------------|
| Biological Process | GO:1905563 | negative regulation of vascular endothelial cell proliferation                   | 4/2279 | 28/18866 | 0.443121  | 0.6759464 | 0.6116203 | 4 | PPARG/MIR24-2/FLT1/MEF2C       |
| Biological Process | GO:0010092 | specification of animal organ identity                                           | 5/2279 | 36/18866 | 0.4432319 | 0.6759464 | 0.6116203 | 5 | RBPI/WNT11/PAX2/FGFR1/MEF2C    |
| Biological Process | GO:0010543 | regulation of platelet activation                                                | 5/2279 | 36/18866 | 0.4432319 | 0.6759464 | 0.6116203 | 5 | CD9/PRKCA/UBASH3B/BLK/PDGFB    |
| Biological Process | GO:0032205 | negative regulation of telomere maintenance                                      | 5/2279 | 36/18866 | 0.4432319 | 0.6759464 | 0.6116203 | 5 | TNKS/RTEL1/SMG6/ERCC1/SLX4     |
| Biological Process | GO:0032435 | negative regulation of proteasomal ubiquitin-dependent protein catabolic process | 5/2279 | 36/18866 | 0.4432319 | 0.6759464 | 0.6116203 | 5 | TRIM39/CLEC16A/MAP1A/BAG5/SVIP |
| Biological Process | GO:0042491 | inner ear auditory receptor cell differentiation                                 | 5/2279 | 36/18866 | 0.4432319 | 0.6759464 | 0.6116203 | 5 | DLL1/RBPI/FGFR1/NOTCH1/TMC1    |
| Biological Process | GO:0045742 | positive regulation of epidermal growth factor receptor signaling pathway        | 5/2279 | 36/18866 | 0.4432319 | 0.6759464 | 0.6116203 | 5 | TGFA/DOK1/ARAP1/PDE6H/DGKD     |
| Biological Process | GO:0046676 | negative regulation of insulin secretion                                         | 5/2279 | 36/18866 | 0.4432319 | 0.6759464 | 0.6116203 | 5 | ENY2/GHRL/KLF7/SREBF1/PRKN     |
| Biological Process | GO:1901099 | negative regulation of signal transduction in absence of ligand                  | 5/2279 | 36/18866 | 0.4432319 | 0.6759464 | 0.6116203 | 5 | TNF/UNC5B/RIPK1/BCL2/BCL2L1    |

|                    |            |                                                                                   |         |           |           |           |           |    |                                                                                                                                                                                                                                     |
|--------------------|------------|-----------------------------------------------------------------------------------|---------|-----------|-----------|-----------|-----------|----|-------------------------------------------------------------------------------------------------------------------------------------------------------------------------------------------------------------------------------------|
| Biological Process | GO:1901385 | regulation of voltage-gated calcium channel activity                              | 5/2279  | 36/18866  | 0.4432319 | 0.6759464 | 0.6116203 | 5  | AHNAK/NOS1AP/DYSF/FGF14/CBARP                                                                                                                                                                                                       |
| Biological Process | GO:2001240 | negative regulation of extrinsic apoptotic signaling pathway in absence of ligand | 5/2279  | 36/18866  | 0.4432319 | 0.6759464 | 0.6116203 | 5  | TNF/UNC5B/RIPK1/BCL2/BCL2L1                                                                                                                                                                                                         |
| Biological Process | GO:0090305 | nucleic acid phosphodiester bond hydrolysis                                       | 39/2279 | 313/18866 | 0.4436599 | 0.6764905 | 0.6121126 | 39 | PIWIL4/CECR2/RNASE3/FIP1L1/POLE/EXOSC2/ERN1/CPSF3/PAM16/TDP1/SLFN14/RCL1/AGO1/ZC3H12D/EME1/MEIOB/RNASE10/AGO2/EDC3/NOB1/NTHL1/ERI3/SMG6/DFFB/RMRP/DNASE1L3/NOP14/DIS3L2/PLD3/ERCC1/SND1/TOE1/CPSF4/POLD3/XPA/TUT1/ERCC2/ISG20/FBH1  |
| Biological Process | GO:0030282 | bone mineralization                                                               | 15/2279 | 117/18866 | 0.4445116 | 0.6776804 | 0.6131893 | 15 | SBNO2/SMAD3/SLC8A1/FGR/ASGR2/WNT11/TGFB1/BMPR1B/SGMS2/MEF2C/LTF/ANO6/FAM20C/ERCC2/RFLNA                                                                                                                                             |
| Biological Process | GO:0048511 | rhythmic process                                                                  | 38/2279 | 305/18866 | 0.4452766 | 0.6787378 | 0.6141461 | 38 | PPARG/NCOR2/CSNK1D/CREB1/MAP2K6/ARRB1/KDM2A/PHLPP1/ZFHX3/DDC/HDAC1/MTA1/GNA11/GHRL/BMPR1B/NCOA1/CSNK1E/CREBBP/PPP1CB/ETS1/ARRB2/ARNTL/PER2/NTK1/PER1/RAI1/FBXL6/DNM1L/SLIT3/UBE3A/USP2/NCOA2/TYRO3/SREBF1/FBXW11/CPT1A/INHBA/PRKAA1 |
| Biological Process | GO:0007093 | mitotic cell cycle checkpoint                                                     | 21/2279 | 166/18866 | 0.4457475 | 0.6793467 | 0.614697  | 21 | TRIM39/BLM/TFDP1/MAD1L1/FOXN3/HUS1/E2F7/PCBP4/EME1/ZNF385A/TGFB1/ARID3A/TAOK3/ZFYVE19/CLSPN/RB1/CHEK2/BCL2L1/NAE1/PCID2/MAP3K20                                                                                                     |
| Biological Process | GO:0006939 | smooth muscle contraction                                                         | 14/2279 | 109/18866 | 0.4464086 | 0.6795154 | 0.6148497 | 14 | PDE4D/MIR143/MIR145/MYH11/MYLK/SLC8A1/CTTN/GHRL/CHRM2/TPCN2/P2RX1/F2R/SMTN/DAPK3                                                                                                                                                    |
| Biological Process | GO:0043618 | regulation of transcription from RNA polymerase II promoter in response to stress | 14/2279 | 109/18866 | 0.4464086 | 0.6795154 | 0.6148497 | 14 | NCK2/RBPJ/LIMD1/PSMF1/CREBBP/NFE2L2/ANKRD2/PSMB7/NOTCH1/EPAS1/NEDD4/CEBPB/BACH1/PSMD13                                                                                                                                              |
| Biological Process | GO:2000278 | regulation of DNA biosynthetic process                                            | 14/2279 | 109/18866 | 0.4464086 | 0.6795154 | 0.6148497 | 14 | PPARG/TFDP1/TNKS/HMBOX1/PARP4/GRHL2/SMG6/PDGFB/ARRB2/NPPC/PDGFRB/ANKRD1/PARM1/CCT6A                                                                                                                                                 |

|                    |            |                                                            |         |           |           |           |           |    |                                                                                                                                                                                                                                                                |
|--------------------|------------|------------------------------------------------------------|---------|-----------|-----------|-----------|-----------|----|----------------------------------------------------------------------------------------------------------------------------------------------------------------------------------------------------------------------------------------------------------------|
| Biological Process | GO:0002792 | negative regulation of peptide secretion                   | 13/2279 | 101/18866 | 0.4483736 | 0.6795154 | 0.6148497 | 13 | RAB11FIP1/FRMD4A/MIR199A1/RHBDF2/CRHBP/ENY2/GHRL/KLF7/MIR199A2/F2R/SREBF1/ADTRP/PRKN                                                                                                                                                                           |
| Biological Process | GO:0031124 | mRNA 3'-end processing                                     | 13/2279 | 101/18866 | 0.4483736 | 0.6795154 | 0.6148497 | 13 | FIP1L1/CPSF3/APP/PABPN1/CPEB3/SCAF8/ZC3H3/RPRD1B/CPSF4/RNF40/TUT1/PAPOLG/GRSF1                                                                                                                                                                                 |
| Biological Process | GO:0042102 | positive regulation of T cell proliferation                | 13/2279 | 101/18866 | 0.4483736 | 0.6795154 | 0.6148497 | 13 | HLA-DMB/CD55/CCR2/CCL5/NCK2/TNFSF13B/TGFBR2/CCDC88B/PTPRC/SPTA1/PNP/SLC7A1/FADD                                                                                                                                                                                |
| Biological Process | GO:0044264 | cellular polysaccharide metabolic process                  | 13/2279 | 101/18866 | 0.4483736 | 0.6795154 | 0.6148497 | 13 | CSGALNACT1/PRKAG2/AOAH/MGAM/NDST1/DYRK2/PPP1CB/ESRRB/PER2/PCDH12/HAS3/B3GNT2/RUBCNL                                                                                                                                                                            |
| Biological Process | GO:0044773 | mitotic DNA damage checkpoint                              | 13/2279 | 101/18866 | 0.4483736 | 0.6795154 | 0.6148497 | 13 | TRIM39/BLM/TFDP1/FOXN3/HUS1/E2F7/PCBP4/EME1/ZNF385A/ARID3A/TAOK3/CLSPN/CHEK2                                                                                                                                                                                   |
| Biological Process | GO:0032984 | protein-containing complex disassembly                     | 41/2279 | 330/18866 | 0.4486962 | 0.6795154 | 0.6148497 | 41 | VILL/GSN/MRPL3/TNF/CAPG/MICAL1/MICAL2/MICAL3/NAV3/MRPL38/UVRAG/IGF1R/TMOD3/AXIN1/SVIL/CLEC16A/ATG14/SH3GL1/WDR1/SPTA1/SMARCD1/FRAT2/SMARCD2/ADD1/MRPS21/MRPS26/MAP1A/AVIL/SCAF8/FLII/ARHGEF2/MRPL28/SPTAN1/ASPH/TMOD1/AURKAIP1/SPTBN4/SPEF1/TFIP11/SHFL/RUBCNL |
| Biological Process | GO:0045185 | maintenance of protein location                            | 12/2279 | 93/18866  | 0.4504142 | 0.6795154 | 0.6148497 | 12 | LTBP1/SORL1/IL10/HK1/GSN/SYNE1/VPS13D/SUFU/HK2/MORC3/SP100/BCL3                                                                                                                                                                                                |
| Biological Process | GO:1904894 | positive regulation of receptor signaling pathway via STAT | 12/2279 | 93/18866  | 0.4504142 | 0.6795154 | 0.6148497 | 12 | IL10/MGAT5/TNF/CCL5/CSF1R/TNFRSF1A/IL6R/NOTCH1/F2R/CRLF1/PARP9/LIF                                                                                                                                                                                             |
| Biological Process | GO:0007224 | smoothened signaling pathway                               | 18/2279 | 142/18866 | 0.4516163 | 0.6795154 | 0.6148497 | 18 | MGRN1/CHSY1/KIAA0586/SUFU/HIPK2/TGFBR2/NDST1/POR/DYRK2/RUNX2/IFT140/CREBBP/RB1/TTC21B/STK36/OTX2/KCTD21/TXNDC15                                                                                                                                                |

|                    |            |                                                                                    |         |           |           |           |           |    |                                                                                                             |
|--------------------|------------|------------------------------------------------------------------------------------|---------|-----------|-----------|-----------|-----------|----|-------------------------------------------------------------------------------------------------------------|
| Biological Process | GO:0038094 | Fc-gamma receptor signaling pathway                                                | 18/2279 | 142/18866 | 0.4516163 | 0.6795154 | 0.6148497 | 18 | ELMO1/DOCK1/PIK3R1/WIPF1/FGR/CYFIP2/BAIAP2/WASL/PTPRJ/VAV2/PTPRC/ACTG1/NCKAP1/PRKCE/MYO1C/PLCG1/CYFIP1/VAV3 |
| Biological Process | GO:0110110 | positive regulation of animal organ morphogenesis                                  | 11/2279 | 85/18866  | 0.4525395 | 0.6795154 | 0.6148497 | 11 | VDR/TNFAIP3/TGFBR2/RBPJ/WNT11/PAX2/FGFR1/ENG/NOTCH1/LIF/HOXB7                                               |
| Biological Process | GO:0030500 | regulation of bone mineralization                                                  | 10/2279 | 77/18866  | 0.4547603 | 0.6795154 | 0.6148497 | 10 | SMAD3/SLC8A1/TGFB1/BMPR1B/SGMS2/MEF2C/LTF/ANO6/FAM20C/RFLNA                                                 |
| Biological Process | GO:0046902 | regulation of mitochondrial membrane permeability                                  | 10/2279 | 77/18866  | 0.4547603 | 0.6795154 | 0.6148497 | 10 | TFDP1/YWHAH/BMF/SPG7/HK2/YWHAZ/BCL2/TP53BP2/BCL2L1/YWHAQ                                                    |
| Biological Process | GO:0061418 | regulation of transcription from RNA polymerase II promoter in response to hypoxia | 10/2279 | 77/18866  | 0.4547603 | 0.6795154 | 0.6148497 | 10 | RBPJ/LIMD1/PSMF1/CREBBP/NFE2L2/PSMB7/NOTCH1/EPAS1/BACH1/PSMD13                                              |
| Biological Process | GO:0007052 | mitotic spindle organization                                                       | 15/2279 | 118/18866 | 0.4581891 | 0.6795154 | 0.6148497 | 15 | ARHGEF10/DCTN1/TNKS/RAE1/RCC1/DYNC1H1/POC1A/DCTN2/TACC3/STAG1/NUMA1/MSTO1/CHEK2/PTPA/ABRAXAS1               |
| Biological Process | GO:0033013 | tetrapyrrole metabolic process                                                     | 8/2279  | 61/18866  | 0.4595445 | 0.6795154 | 0.6148497 | 8  | ABCC1/SLC11A2/FECH/ALAS1/CD320/SPTA1/PPOX/TMEM14C                                                           |
| Biological Process | GO:0042278 | purine nucleoside metabolic process                                                | 8/2279  | 61/18866  | 0.4595445 | 0.6795154 | 0.6148497 | 8  | AMPD3/TJP2/MACROD1/PNP/GUK1/GMPR2/IMPDH1/ACP3                                                               |
| Biological Process | GO:1903902 | positive regulation of viral life cycle                                            | 8/2279  | 61/18866  | 0.4595445 | 0.6795154 | 0.6148497 | 8  | P4HB/TRIM38/SRPK2/CCL5/LARP1/PC/NOTCH1/NR5A2                                                                |

|                    |            |                                                                                                     |         |           |           |           |           |    |                                                                                                                                                                                                         |
|--------------------|------------|-----------------------------------------------------------------------------------------------------|---------|-----------|-----------|-----------|-----------|----|---------------------------------------------------------------------------------------------------------------------------------------------------------------------------------------------------------|
| Biological Process | GO:0006814 | sodium ion transport                                                                                | 30/2279 | 241/18866 | 0.4595953 | 0.6795154 | 0.6148497 | 30 | TRPM2/SLC38A4/SLC38A10/SLC10A1/FXYD2/YWHAH/SLC24A4/FXYD1/SLC8A1/DNM2/SGK1/TESC/ACTN4/SCN1A/SLC13A4/ASIC4/SLC22A5/SNTA1/PER1/PRKCE/SLC5A10/NEDD4/ANO6/HECW2/SLC13A5/SLC12A1/SPTBN4/SLC23A1/FGF14/SLC41A1 |
| Biological Process | GO:0038093 | Fc receptor signaling pathway                                                                       | 30/2279 | 241/18866 | 0.4595953 | 0.6795154 | 0.6148497 | 30 | LAT/ELMO1/DOCK1/PIK3R1/GAB2/WIPF1/FGR/CYFIP2/GRAP2/NFATC2/NFATC1/BAIAP2/WASL/FER/PTPRJ/VAV2/PTPRC/ACTG1/BCL10/PSMF1/NCKAP1/PSMB7/PRKCE/MYO1C/PLCG1/CYFIP1/RELA/FBXW11/PSMD13/VAV3                       |
| Biological Process | GO:0051054 | positive regulation of DNA metabolic process                                                        | 25/2279 | 200/18866 | 0.4597379 | 0.6795154 | 0.6148497 | 25 | FAM168A/SPIDR/TNKS/HMBOX1/RTEL1/TGFB1/PTPRC/GRHL2/PDGFB/ARRB2/TP53BP1/FOXO1/PDGFRB/ERCC1/TNFSF13/SLX4/PARM1/CCT6A/ERCC2/PARP9/PAXIP1/NSD2/ABRAXAS1/SLF1/BABAM2                                          |
| Biological Process | GO:0000077 | DNA damage checkpoint                                                                               | 19/2279 | 151/18866 | 0.4616872 | 0.6795154 | 0.6148497 | 19 | TRIM39/BLM/FZR1/TFDP1/FOXO3/HUS1/E2F7/PCBP4/EME1/ZNF385A/ARID3A/TAOK3/CLSPN/TP53BP1/RHNO1/CHEK2/MAP3K20/ABRAXAS1/BABAM2                                                                                 |
| Biological Process | GO:0043392 | negative regulation of DNA binding                                                                  | 7/2279  | 53/18866  | 0.4621442 | 0.6795154 | 0.6148497 | 7  | TNKS/CPNE1/RSF1/ZNF462/PER2/SP100/ILRUN                                                                                                                                                                 |
| Biological Process | GO:0043502 | regulation of muscle adaptation                                                                     | 13/2279 | 102/18866 | 0.4631018 | 0.6795154 | 0.6148497 | 13 | HDAC4/CTDP1/MIR145/TNFRSF1B/SMAD3/PRKCA/MIR199A1/TNFRSF1A/PDE9A/MIR199A2/NOTCH1/FOXO1/CASQ1                                                                                                             |
| Biological Process | GO:0006611 | protein export from nucleus                                                                         | 23/2279 | 184/18866 | 0.4640666 | 0.6795154 | 0.6148497 | 23 | CALR/NXF1/FIP1L1/CPSF3/SETD2/RAE1/XPO7/TCF7L2/SMG7/XPO6/TGFB1/PABPN1/ENY2/SMURF1/NUP93/SEC13/SMG6/SP100/HHEX/RBM15B/NOL6/CPSF4/PCID2                                                                    |
| Biological Process | GO:0035094 | response to nicotine                                                                                | 6/2279  | 45/18866  | 0.4649127 | 0.6795154 | 0.6148497 | 6  | CREB1/PPP1R1B/TNF/NTRK1/BCL2/RELA                                                                                                                                                                       |
| Biological Process | GO:1901028 | regulation of mitochondrial outer membrane permeabilization involved in apoptotic signaling pathway | 6/2279  | 45/18866  | 0.4649127 | 0.6795154 | 0.6148497 | 6  | TFDP1/YWHAH/YWHAZ/BCL2/TP53BP2/YWHAQ                                                                                                                                                                    |



|                    |            |                                                                           |         |          |           |           |           |    |                                                                    |
|--------------------|------------|---------------------------------------------------------------------------|---------|----------|-----------|-----------|-----------|----|--------------------------------------------------------------------|
| Biological Process | GO:1903214 | regulation of protein targeting to mitochondrion                          | 6/2279  | 45/18866 | 0.4649127 | 0.6795154 | 0.6148497 | 6  | USP36/ABLIM3/UBE2J2/SREBF1/PRKAA1/PRKN                             |
| Biological Process | GO:0006296 | nucleotide-excision repair, DNA incision, 5'-to lesion                    | 5/2279  | 37/18866 | 0.4678769 | 0.6795154 | 0.6148497 | 5  | NTHL1/ERCC1/POLD3/XPA/ERCC2                                        |
| Biological Process | GO:0006882 | cellular zinc ion homeostasis                                             | 5/2279  | 37/18866 | 0.4678769 | 0.6795154 | 0.6148497 | 5  | S100A8/LCK/SLC39A13/AP3D1/ATP7B                                    |
| Biological Process | GO:0043243 | positive regulation of protein-containing complex disassembly             | 5/2279  | 37/18866 | 0.4678769 | 0.6795154 | 0.6148497 | 5  | TNF/UVRAG/IGF1R/CLEC16A/WDR1                                       |
| Biological Process | GO:0060969 | negative regulation of gene silencing                                     | 5/2279  | 37/18866 | 0.4678769 | 0.6795154 | 0.6148497 | 5  | PPARG/NCOR2/TNF/TGFB1/RMRP                                         |
| Biological Process | GO:0070897 | transcription preinitiation complex assembly                              | 5/2279  | 37/18866 | 0.4678769 | 0.6795154 | 0.6148497 | 5  | TAF1C/CREB1/ATF7IP/BRF1/PIH1D1                                     |
| Biological Process | GO:2000785 | regulation of autophagosome assembly                                      | 5/2279  | 37/18866 | 0.4678769 | 0.6795154 | 0.6148497 | 5  | ULK1/PIP4K2A/FEZ2/TBC1D14/NPRL2                                    |
| Biological Process | GO:0007193 | adenylate cyclase-inhibiting G protein-coupled receptor signaling pathway | 11/2279 | 86/18866 | 0.4685993 | 0.6795154 | 0.6148497 | 11 | ADCY2/ADCY9/FPR2/GNAZ/GNAI2/AKAP5/MARCO/CHRM2/PALM/ADCY4/GABBR1    |
| Biological Process | GO:0042509 | regulation of tyrosine phosphorylation of STAT protein                    | 11/2279 | 86/18866 | 0.4685993 | 0.6795154 | 0.6148497 | 11 | TNF/CCL5/CSF1R/TNFRSF1A/IL6R/PPP2R1A/GGNBP2/INPP5F/CRLF1/PARP9/LIF |

|                    |            |                                                                     |         |           |           |           |           |    |                                                                                           |
|--------------------|------------|---------------------------------------------------------------------|---------|-----------|-----------|-----------|-----------|----|-------------------------------------------------------------------------------------------|
| Biological Process | GO:1901532 | regulation of hematopoietic progenitor cell differentiation         | 11/2279 | 86/18866  | 0.4685993 | 0.6795154 | 0.6148497 | 11 | MYB/RUNX1/TCF12/SETD1A/PSMF1/NFE2L2/PUS7/TCF3/PSMB7/NOTCH1/PSMD13                         |
| Biological Process | GO:1900180 | regulation of protein localization to nucleus                       | 16/2279 | 127/18866 | 0.4691082 | 0.6795154 | 0.6148497 | 16 | TRIM8/ANGPT1/PIK3R1/SMAD3/SUFU/JUP/TGFB1/LILRB4/NF1/CDH1/CABP1/KAT7/CCT6A/PARP9/LIF/ILRUN |
| Biological Process | GO:0001773 | myeloid dendritic cell activation                                   | 4/2279  | 29/18866  | 0.4710561 | 0.6795154 | 0.6148497 | 4  | IL10/TGFBR2/RBPJ/DOCK2                                                                    |
| Biological Process | GO:0002717 | positive regulation of natural killer cell mediated immunity        | 4/2279  | 29/18866  | 0.4710561 | 0.6795154 | 0.6148497 | 4  | CD226/HLA-F/IL18RAP/CADM1                                                                 |
| Biological Process | GO:0003351 | epithelial cilium movement involved in extracellular fluid movement | 4/2279  | 29/18866  | 0.4710561 | 0.6795154 | 0.6148497 | 4  | RFX3/STK36/TLL1/KATNIP                                                                    |
| Biological Process | GO:0021602 | cranial nerve morphogenesis                                         | 4/2279  | 29/18866  | 0.4710561 | 0.6795154 | 0.6148497 | 4  | NRP2/PHOX2A/ATP8B1/PAX2                                                                   |
| Biological Process | GO:0031365 | N-terminal protein amino acid modification                          | 4/2279  | 29/18866  | 0.4710561 | 0.6795154 | 0.6148497 | 4  | PDF/CREBBP/NAA16/NTMT1                                                                    |
| Biological Process | GO:0032373 | positive regulation of sterol transport                             | 4/2279  | 29/18866  | 0.4710561 | 0.6795154 | 0.6148497 | 4  | ABCG1/PLTP/NR1H2/ABCA1                                                                    |
| Biological Process | GO:0032376 | positive regulation of cholesterol transport                        | 4/2279  | 29/18866  | 0.4710561 | 0.6795154 | 0.6148497 | 4  | ABCG1/PLTP/NR1H2/ABCA1                                                                    |

|                    |            |                                                                        |         |          |           |           |           |    |                                                               |
|--------------------|------------|------------------------------------------------------------------------|---------|----------|-----------|-----------|-----------|----|---------------------------------------------------------------|
| Biological Process | GO:0035116 | embryonic hindlimb morphogenesis                                       | 4/2279  | 29/18866 | 0.4710561 | 0.6795154 | 0.6148497 | 4  | ZBTB16/RARG/NOTCH1/ALX3                                       |
| Biological Process | GO:0036296 | response to increased oxygen levels                                    | 4/2279  | 29/18866 | 0.4710561 | 0.6795154 | 0.6148497 | 4  | PPARG/CAT/PDGFRB/FOXO1                                        |
| Biological Process | GO:0045822 | negative regulation of heart contraction                               | 4/2279  | 29/18866 | 0.4710561 | 0.6795154 | 0.6148497 | 4  | PDE4D/BIN1/SPTBN4/GRK2                                        |
| Biological Process | GO:0060441 | epithelial tube branching involved in lung morphogenesis               | 4/2279  | 29/18866 | 0.4710561 | 0.6795154 | 0.6148497 | 4  | CTSZ/TNF/CTSH/RDH10                                           |
| Biological Process | GO:0070979 | protein K11-linked ubiquitination                                      | 4/2279  | 29/18866 | 0.4710561 | 0.6795154 | 0.6148497 | 4  | FZR1/CDC16/ANAPC7/PRKN                                        |
| Biological Process | GO:0090344 | negative regulation of cell aging                                      | 4/2279  | 29/18866 | 0.4710561 | 0.6795154 | 0.6148497 | 4  | FZR1/MAP3K3/AKT3/FOXM1                                        |
| Biological Process | GO:2001032 | regulation of double-strand break repair via nonhomologous end joining | 4/2279  | 29/18866 | 0.4710561 | 0.6795154 | 0.6148497 | 4  | PARP9/TFIP11/NSD2/CYREN                                       |
| Biological Process | GO:0001895 | retina homeostasis                                                     | 10/2279 | 78/18866 | 0.471635  | 0.6795154 | 0.6148497 | 10 | CRB1/CDH23/CCDC66/CDH3/ACTG1/ESRRB/CDHR1/LTF/SLC2A1/NPHP4     |
| Biological Process | GO:0030433 | ubiquitin-dependent ERAD pathway                                       | 10/2279 | 78/18866 | 0.471635  | 0.6795154 | 0.6148497 | 10 | AMFR/RHBDD2/EDEM1/DERL2/UBE2J2/EDEM2/NFE2L2/UBXN8/SVIP/MARCH6 |

|                    |            |                                                               |         |           |           |           |           |    |                                                                                                                                                  |
|--------------------|------------|---------------------------------------------------------------|---------|-----------|-----------|-----------|-----------|----|--------------------------------------------------------------------------------------------------------------------------------------------------|
| Biological Process | GO:1903046 | meiotic cell cycle process                                    | 24/2279 | 193/18866 | 0.4725821 | 0.6795154 | 0.6148497 | 24 | CALR/FZR1/MOV10L1/BRCA2/HUS1/EME1/MYH9/MEIOB/CDC25A/OVOL1/FANCA/RNF212/PPP2R1A/PLCB1/CCNA1/RAD21L1/DMC1/ERCC1/SLX4/TEX12/LIF/KLHDC3/PSMD13/TERB2 |
| Biological Process | GO:0006293 | nucleotide-excision repair, preincision complex stabilization | 3/2279  | 21/18866  | 0.4744086 | 0.6795154 | 0.6148497 | 3  | ERCC1/XPA/ERCC2                                                                                                                                  |
| Biological Process | GO:0006295 | nucleotide-excision repair, DNA incision, 3'-to lesion        | 3/2279  | 21/18866  | 0.4744086 | 0.6795154 | 0.6148497 | 3  | ERCC1/XPA/ERCC2                                                                                                                                  |
| Biological Process | GO:0006833 | water transport                                               | 3/2279  | 21/18866  | 0.4744086 | 0.6795154 | 0.6148497 | 3  | AQP1/AQP3/AQP9                                                                                                                                   |
| Biological Process | GO:0010847 | regulation of chromatin assembly                              | 3/2279  | 21/18866  | 0.4744086 | 0.6795154 | 0.6148497 | 3  | ATF7IP/DNMT1/PARP10                                                                                                                              |
| Biological Process | GO:0016075 | rRNA catabolic process                                        | 3/2279  | 21/18866  | 0.4744086 | 0.6795154 | 0.6148497 | 3  | EXOSC2/SLFN14/DEDD2                                                                                                                              |
| Biological Process | GO:0021854 | hypothalamus development                                      | 3/2279  | 21/18866  | 0.4744086 | 0.6795154 | 0.6148497 | 3  | NRP2/NCOA1/ETS1                                                                                                                                  |
| Biological Process | GO:0030277 | maintenance of gastrointestinal epithelium                    | 3/2279  | 21/18866  | 0.4744086 | 0.6795154 | 0.6148497 | 3  | TLR9/SLC22A5/NOD2                                                                                                                                |
| Biological Process | GO:0031061 | negative regulation of histone methylation                    | 3/2279  | 21/18866  | 0.4744086 | 0.6795154 | 0.6148497 | 3  | KDM4C/DNMT1/PIH1D1                                                                                                                               |

|                    |            |                                                              |        |          |           |           |           |   |                      |
|--------------------|------------|--------------------------------------------------------------|--------|----------|-----------|-----------|-----------|---|----------------------|
| Biological Process | GO:0032482 | Rab protein signal transduction                              | 3/2279 | 21/18866 | 0.4744086 | 0.6795154 | 0.6148497 | 3 | DENND1A/DENND3/RAB30 |
| Biological Process | GO:0033630 | positive regulation of cell adhesion mediated by integrin    | 3/2279 | 21/18866 | 0.4744086 | 0.6795154 | 0.6148497 | 3 | CCL5/PTPN6/LIF       |
| Biological Process | GO:0033962 | P-body assembly                                              | 3/2279 | 21/18866 | 0.4744086 | 0.6795154 | 0.6148497 | 3 | DYNC1H1/LIMD1/EDC3   |
| Biological Process | GO:0035357 | peroxisome proliferator activated receptor signaling pathway | 3/2279 | 21/18866 | 0.4744086 | 0.6795154 | 0.6148497 | 3 | RXRA/PPARG/ACTN4     |
| Biological Process | GO:0035813 | regulation of renal sodium excretion                         | 3/2279 | 21/18866 | 0.4744086 | 0.6795154 | 0.6148497 | 3 | COMT/GNAI2/AGTR1     |
| Biological Process | GO:0035929 | steroid hormone secretion                                    | 3/2279 | 21/18866 | 0.4744086 | 0.6795154 | 0.6148497 | 3 | GHRL/AGTR1/INHBA     |
| Biological Process | GO:0036150 | phosphatidylserine acyl-chain remodeling                     | 3/2279 | 21/18866 | 0.4744086 | 0.6795154 | 0.6148497 | 3 | OSBPL5/OSBPL10/PLA1A |
| Biological Process | GO:0042107 | cytokine metabolic process                                   | 3/2279 | 21/18866 | 0.4744086 | 0.6795154 | 0.6148497 | 3 | CEBPE/IGF2BP3/ASB1   |
| Biological Process | GO:0043984 | histone H4-K16 acetylation                                   | 3/2279 | 21/18866 | 0.4744086 | 0.6795154 | 0.6148497 | 3 | KANSL1/KANSL2/PIH1D1 |

|                    |            |                                                                                                     |        |          |           |           |           |   |                          |
|--------------------|------------|-----------------------------------------------------------------------------------------------------|--------|----------|-----------|-----------|-----------|---|--------------------------|
| Biological Process | GO:0045943 | positive regulation of transcription by RNA polymerase I                                            | 3/2279 | 21/18866 | 0.4744086 | 0.6795154 | 0.6148497 | 3 | WDR43/PIH1D1/MARS1       |
| Biological Process | GO:0071498 | cellular response to fluid shear stress                                                             | 3/2279 | 21/18866 | 0.4744086 | 0.6795154 | 0.6148497 | 3 | MTSS1/NFE2L2/MEF2C       |
| Biological Process | GO:0098698 | postsynaptic specialization assembly                                                                | 3/2279 | 21/18866 | 0.4744086 | 0.6795154 | 0.6148497 | 3 | NRXN1/NRXN2/SHANK2       |
| Biological Process | GO:0140131 | positive regulation of lymphocyte chemotaxis                                                        | 3/2279 | 21/18866 | 0.4744086 | 0.6795154 | 0.6148497 | 3 | CCR2/CCL5/CCL27          |
| Biological Process | GO:1902548 | negative regulation of cellular response to vascular endothelial growth factor stimulus             | 3/2279 | 21/18866 | 0.4744086 | 0.6795154 | 0.6148497 | 3 | MIR199A1/MIR199A2/ADGRA2 |
| Biological Process | GO:1902656 | calcium ion import into cytosol                                                                     | 3/2279 | 21/18866 | 0.4744086 | 0.6795154 | 0.6148497 | 3 | TRPM2/SLC8A1/TRPV2       |
| Biological Process | GO:1903204 | negative regulation of oxidative stress-induced neuron death                                        | 3/2279 | 21/18866 | 0.4744086 | 0.6795154 | 0.6148497 | 3 | IL10/FBXO7/PRKN          |
| Biological Process | GO:2000380 | regulation of mesoderm development                                                                  | 3/2279 | 21/18866 | 0.4744086 | 0.6795154 | 0.6148497 | 3 | FGFR1/PUS7/NODAL         |
| Biological Process | GO:0000472 | endonucleolytic cleavage to generate mature 5'-end of SSU-rRNA from (SSU-rRNA, 5.8S rRNA, LSU-rRNA) | 1/2279 | 5/18866  | 0.4746987 | 0.6795154 | 0.6148497 | 1 | NOP14                    |

|                    |            |                                                          |        |         |           |           |           |   |        |
|--------------------|------------|----------------------------------------------------------|--------|---------|-----------|-----------|-----------|---|--------|
| Biological Process | GO:0000710 | meiotic mismatch repair                                  | 1/2279 | 5/18866 | 0.4746987 | 0.6795154 | 0.6148497 | 1 | ERCC1  |
| Biological Process | GO:0000960 | regulation of mitochondrial RNA catabolic process        | 1/2279 | 5/18866 | 0.4746987 | 0.6795154 | 0.6148497 | 1 | GRSF1  |
| Biological Process | GO:0000967 | rRNA 5'-end processing                                   | 1/2279 | 5/18866 | 0.4746987 | 0.6795154 | 0.6148497 | 1 | NOP14  |
| Biological Process | GO:0001757 | somite specification                                     | 1/2279 | 5/18866 | 0.4746987 | 0.6795154 | 0.6148497 | 1 | DLL1   |
| Biological Process | GO:0001923 | B-1 B cell differentiation                               | 1/2279 | 5/18866 | 0.4746987 | 0.6795154 | 0.6148497 | 1 | CMTM7  |
| Biological Process | GO:0002034 | regulation of blood vessel diameter by renin-angiotensin | 1/2279 | 5/18866 | 0.4746987 | 0.6795154 | 0.6148497 | 1 | AGTR1  |
| Biological Process | GO:0002155 | regulation of thyroid hormone mediated signaling pathway | 1/2279 | 5/18866 | 0.4746987 | 0.6795154 | 0.6148497 | 1 | NCOA1  |
| Biological Process | GO:0002249 | lymphocyte anergy                                        | 1/2279 | 5/18866 | 0.4746987 | 0.6795154 | 0.6148497 | 1 | PHLPP1 |
| Biological Process | GO:0002318 | myeloid progenitor cell differentiation                  | 1/2279 | 5/18866 | 0.4746987 | 0.6795154 | 0.6148497 | 1 | JAM3   |

|                    |            |                                                                                                            |        |         |           |           |           |   |        |
|--------------------|------------|------------------------------------------------------------------------------------------------------------|--------|---------|-----------|-----------|-----------|---|--------|
| Biological Process | GO:0002580 | regulation of antigen processing and presentation of peptide or polysaccharide antigen via MHC class II    | 1/2279 | 5/18866 | 0.4746987 | 0.6795154 | 0.6148497 | 1 | THBS1  |
| Biological Process | GO:0002667 | regulation of T cell anergy                                                                                | 1/2279 | 5/18866 | 0.4746987 | 0.6795154 | 0.6148497 | 1 | PHLPP1 |
| Biological Process | GO:0002870 | T cell anergy                                                                                              | 1/2279 | 5/18866 | 0.4746987 | 0.6795154 | 0.6148497 | 1 | PHLPP1 |
| Biological Process | GO:0002911 | regulation of lymphocyte anergy                                                                            | 1/2279 | 5/18866 | 0.4746987 | 0.6795154 | 0.6148497 | 1 | PHLPP1 |
| Biological Process | GO:0003072 | renal control of peripheral vascular resistance involved in regulation of systemic arterial blood pressure | 1/2279 | 5/18866 | 0.4746987 | 0.6795154 | 0.6148497 | 1 | AGTR1  |
| Biological Process | GO:0003241 | growth involved in heart morphogenesis                                                                     | 1/2279 | 5/18866 | 0.4746987 | 0.6795154 | 0.6148497 | 1 | NOTCH1 |
| Biological Process | GO:0003289 | atrial septum primum morphogenesis                                                                         | 1/2279 | 5/18866 | 0.4746987 | 0.6795154 | 0.6148497 | 1 | NSD2   |
| Biological Process | GO:0006001 | fructose catabolic process                                                                                 | 1/2279 | 5/18866 | 0.4746987 | 0.6795154 | 0.6148497 | 1 | GLYCK  |
| Biological Process | GO:0006104 | succinyl-CoA metabolic process                                                                             | 1/2279 | 5/18866 | 0.4746987 | 0.6795154 | 0.6148497 | 1 | OGDH   |



|                    |            |                                                          |        |         |           |           |           |   |       |
|--------------------|------------|----------------------------------------------------------|--------|---------|-----------|-----------|-----------|---|-------|
| Biological Process | GO:0006398 | mRNA 3'-end processing by stem-loop binding and cleavage | 1/2279 | 5/18866 | 0.4746987 | 0.6795154 | 0.6148497 | 1 | CPSF3 |
| Biological Process | GO:0006522 | alanine metabolic process                                | 1/2279 | 5/18866 | 0.4746987 | 0.6795154 | 0.6148497 | 1 | AGXT  |
| Biological Process | GO:0006524 | alanine catabolic process                                | 1/2279 | 5/18866 | 0.4746987 | 0.6795154 | 0.6148497 | 1 | AGXT  |
| Biological Process | GO:0006549 | isoleucine metabolic process                             | 1/2279 | 5/18866 | 0.4746987 | 0.6795154 | 0.6148497 | 1 | ACAT1 |
| Biological Process | GO:0006663 | platelet activating factor biosynthetic process          | 1/2279 | 5/18866 | 0.4746987 | 0.6795154 | 0.6148497 | 1 | CHPT1 |
| Biological Process | GO:0007023 | post-chaperonin tubulin folding pathway                  | 1/2279 | 5/18866 | 0.4746987 | 0.6795154 | 0.6148497 | 1 | TBCD  |
| Biological Process | GO:0007343 | egg activation                                           | 1/2279 | 5/18866 | 0.4746987 | 0.6795154 | 0.6148497 | 1 | PLCB1 |
| Biological Process | GO:0008215 | spermine metabolic process                               | 1/2279 | 5/18866 | 0.4746987 | 0.6795154 | 0.6148497 | 1 | SAT2  |
| Biological Process | GO:0008582 | regulation of synaptic growth at neuromuscular junction  | 1/2279 | 5/18866 | 0.4746987 | 0.6795154 | 0.6148497 | 1 | COLQ  |

|                    |            |                                                                   |        |         |           |           |           |   |        |
|--------------------|------------|-------------------------------------------------------------------|--------|---------|-----------|-----------|-----------|---|--------|
| Biological Process | GO:0008628 | hormone-mediated apoptotic signaling pathway                      | 1/2279 | 5/18866 | 0.4746987 | 0.6795154 | 0.6148497 | 1 | SST    |
| Biological Process | GO:0009078 | pyruvate family amino acid metabolic process                      | 1/2279 | 5/18866 | 0.4746987 | 0.6795154 | 0.6148497 | 1 | AGXT   |
| Biological Process | GO:0009080 | pyruvate family amino acid catabolic process                      | 1/2279 | 5/18866 | 0.4746987 | 0.6795154 | 0.6148497 | 1 | AGXT   |
| Biological Process | GO:0009092 | homoserine metabolic process                                      | 1/2279 | 5/18866 | 0.4746987 | 0.6795154 | 0.6148497 | 1 | CBS    |
| Biological Process | GO:0009177 | pyrimidine deoxyribonucleoside monophosphate biosynthetic process | 1/2279 | 5/18866 | 0.4746987 | 0.6795154 | 0.6148497 | 1 | DCTD   |
| Biological Process | GO:0009233 | menaquinone metabolic process                                     | 1/2279 | 5/18866 | 0.4746987 | 0.6795154 | 0.6148497 | 1 | CYP4F3 |
| Biological Process | GO:0009240 | isopentenyl diphosphate biosynthetic process                      | 1/2279 | 5/18866 | 0.4746987 | 0.6795154 | 0.6148497 | 1 | IDI1   |
| Biological Process | GO:0009446 | putrescine biosynthetic process                                   | 1/2279 | 5/18866 | 0.4746987 | 0.6795154 | 0.6148497 | 1 | ODC1   |
| Biological Process | GO:0009448 | gamma-aminobutyric acid metabolic process                         | 1/2279 | 5/18866 | 0.4746987 | 0.6795154 | 0.6148497 | 1 | SLC1A3 |

|                    |            |                                                                   |        |         |           |           |           |   |         |
|--------------------|------------|-------------------------------------------------------------------|--------|---------|-----------|-----------|-----------|---|---------|
| Biological Process | GO:0009608 | response to symbiont                                              | 1/2279 | 5/18866 | 0.4746987 | 0.6795154 | 0.6148497 | 1 | SLC22A5 |
| Biological Process | GO:0009609 | response to symbiotic bacterium                                   | 1/2279 | 5/18866 | 0.4746987 | 0.6795154 | 0.6148497 | 1 | SLC22A5 |
| Biological Process | GO:0010138 | pyrimidine ribonucleotide salvage                                 | 1/2279 | 5/18866 | 0.4746987 | 0.6795154 | 0.6148497 | 1 | UCK2    |
| Biological Process | GO:0010716 | negative regulation of extracellular matrix disassembly           | 1/2279 | 5/18866 | 0.4746987 | 0.6795154 | 0.6148497 | 1 | TGFB1   |
| Biological Process | GO:0010746 | regulation of long-chain fatty acid import across plasma membrane | 1/2279 | 5/18866 | 0.4746987 | 0.6795154 | 0.6148497 | 1 | THBS1   |
| Biological Process | GO:0010750 | positive regulation of nitric oxide mediated signal transduction  | 1/2279 | 5/18866 | 0.4746987 | 0.6795154 | 0.6148497 | 1 | NOS1AP  |
| Biological Process | GO:0010936 | negative regulation of macrophage cytokine production             | 1/2279 | 5/18866 | 0.4746987 | 0.6795154 | 0.6148497 | 1 | TGFB1   |
| Biological Process | GO:0010957 | negative regulation of vitamin D biosynthetic process             | 1/2279 | 5/18866 | 0.4746987 | 0.6795154 | 0.6148497 | 1 | GFI1    |
| Biological Process | GO:0010961 | cellular magnesium ion homeostasis                                | 1/2279 | 5/18866 | 0.4746987 | 0.6795154 | 0.6148497 | 1 | SLC41A1 |

|                    |            |                                                          |        |         |           |           |           |   |         |
|--------------------|------------|----------------------------------------------------------|--------|---------|-----------|-----------|-----------|---|---------|
| Biological Process | GO:0010991 | negative regulation of SMAD protein complex assembly     | 1/2279 | 5/18866 | 0.4746987 | 0.6795154 | 0.6148497 | 1 | LDLRAD4 |
| Biological Process | GO:0014042 | positive regulation of neuron maturation                 | 1/2279 | 5/18866 | 0.4746987 | 0.6795154 | 0.6148497 | 1 | BCL2    |
| Biological Process | GO:0014045 | establishment of endothelial blood-brain barrier         | 1/2279 | 5/18866 | 0.4746987 | 0.6795154 | 0.6148497 | 1 | ENG     |
| Biological Process | GO:0014905 | myoblast fusion involved in skeletal muscle regeneration | 1/2279 | 5/18866 | 0.4746987 | 0.6795154 | 0.6148497 | 1 | CD9     |
| Biological Process | GO:0015670 | carbon dioxide transport                                 | 1/2279 | 5/18866 | 0.4746987 | 0.6795154 | 0.6148497 | 1 | AQP1    |
| Biological Process | GO:0015705 | iodide transport                                         | 1/2279 | 5/18866 | 0.4746987 | 0.6795154 | 0.6148497 | 1 | TG      |
| Biological Process | GO:0015755 | fructose transmembrane transport                         | 1/2279 | 5/18866 | 0.4746987 | 0.6795154 | 0.6148497 | 1 | SLC2A5  |
| Biological Process | GO:0015855 | pyrimidine nucleobase transport                          | 1/2279 | 5/18866 | 0.4746987 | 0.6795154 | 0.6148497 | 1 | AQP9    |
| Biological Process | GO:0015862 | uridine transport                                        | 1/2279 | 5/18866 | 0.4746987 | 0.6795154 | 0.6148497 | 1 | SLC29A1 |

|                    |            |                                                                  |        |         |           |           |           |   |         |
|--------------------|------------|------------------------------------------------------------------|--------|---------|-----------|-----------|-----------|---|---------|
| Biological Process | GO:0015864 | pyrimidine nucleoside transport                                  | 1/2279 | 5/18866 | 0.4746987 | 0.6795154 | 0.6148497 | 1 | SLC29A1 |
| Biological Process | GO:0016191 | synaptic vesicle uncoating                                       | 1/2279 | 5/18866 | 0.4746987 | 0.6795154 | 0.6148497 | 1 | SH3GL1  |
| Biological Process | GO:0016199 | axon midline choice point recognition                            | 1/2279 | 5/18866 | 0.4746987 | 0.6795154 | 0.6148497 | 1 | APP     |
| Biological Process | GO:0018101 | protein citrullination                                           | 1/2279 | 5/18866 | 0.4746987 | 0.6795154 | 0.6148497 | 1 | PADI2   |
| Biological Process | GO:0019346 | transsulfuration                                                 | 1/2279 | 5/18866 | 0.4746987 | 0.6795154 | 0.6148497 | 1 | CBS     |
| Biological Process | GO:0019348 | dolichol metabolic process                                       | 1/2279 | 5/18866 | 0.4746987 | 0.6795154 | 0.6148497 | 1 | DPAGT1  |
| Biological Process | GO:0019509 | L-methionine salvage from methylthioadenosine                    | 1/2279 | 5/18866 | 0.4746987 | 0.6795154 | 0.6148497 | 1 | ADI1    |
| Biological Process | GO:0019919 | peptidyl-arginine methylation, to asymmetrical-dimethyl arginine | 1/2279 | 5/18866 | 0.4746987 | 0.6795154 | 0.6148497 | 1 | PRMT2   |
| Biological Process | GO:0021523 | somatic motor neuron differentiation                             | 1/2279 | 5/18866 | 0.4746987 | 0.6795154 | 0.6148497 | 1 | PHOX2A  |

|                    |            |                                                             |        |         |           |           |           |   |       |
|--------------------|------------|-------------------------------------------------------------|--------|---------|-----------|-----------|-----------|---|-------|
| Biological Process | GO:0021764 | amygdala development                                        | 1/2279 | 5/18866 | 0.4746987 | 0.6795154 | 0.6148497 | 1 | NF1   |
| Biological Process | GO:0021960 | anterior commissure morphogenesis                           | 1/2279 | 5/18866 | 0.4746987 | 0.6795154 | 0.6148497 | 1 | TSKU  |
| Biological Process | GO:0021999 | neural plate anterior/posterior regionalization             | 1/2279 | 5/18866 | 0.4746987 | 0.6795154 | 0.6148497 | 1 | SSBP3 |
| Biological Process | GO:0022614 | membrane to membrane docking                                | 1/2279 | 5/18866 | 0.4746987 | 0.6795154 | 0.6148497 | 1 | EZR   |
| Biological Process | GO:0030222 | eosinophil differentiation                                  | 1/2279 | 5/18866 | 0.4746987 | 0.6795154 | 0.6148497 | 1 | TRIB1 |
| Biological Process | GO:0030263 | apoptotic chromosome condensation                           | 1/2279 | 5/18866 | 0.4746987 | 0.6795154 | 0.6148497 | 1 | DFFB  |
| Biological Process | GO:0030321 | transepithelial chloride transport                          | 1/2279 | 5/18866 | 0.4746987 | 0.6795154 | 0.6148497 | 1 | P2RY6 |
| Biological Process | GO:0030644 | cellular chloride ion homeostasis                           | 1/2279 | 5/18866 | 0.4746987 | 0.6795154 | 0.6148497 | 1 | ABCC2 |
| Biological Process | GO:0030950 | establishment or maintenance of actin cytoskeleton polarity | 1/2279 | 5/18866 | 0.4746987 | 0.6795154 | 0.6148497 | 1 | AQP1  |

|                    |            |                                                    |        |         |           |           |           |   |         |
|--------------------|------------|----------------------------------------------------|--------|---------|-----------|-----------|-----------|---|---------|
| Biological Process | GO:0031119 | tRNA pseudouridine synthesis                       | 1/2279 | 5/18866 | 0.4746987 | 0.6795154 | 0.6148497 | 1 | PUS7    |
| Biological Process | GO:0031179 | peptide modification                               | 1/2279 | 5/18866 | 0.4746987 | 0.6795154 | 0.6148497 | 1 | GGT1    |
| Biological Process | GO:0031427 | response to methotrexate                           | 1/2279 | 5/18866 | 0.4746987 | 0.6795154 | 0.6148497 | 1 | ABCC2   |
| Biological Process | GO:0032218 | riboflavin transport                               | 1/2279 | 5/18866 | 0.4746987 | 0.6795154 | 0.6148497 | 1 | SLC52A2 |
| Biological Process | GO:0032262 | pyrimidine nucleotide salvage                      | 1/2279 | 5/18866 | 0.4746987 | 0.6795154 | 0.6148497 | 1 | UCK2    |
| Biological Process | GO:0032687 | negative regulation of interferon-alpha production | 1/2279 | 5/18866 | 0.4746987 | 0.6795154 | 0.6148497 | 1 | IL10    |
| Biological Process | GO:0032741 | positive regulation of interleukin-18 production   | 1/2279 | 5/18866 | 0.4746987 | 0.6795154 | 0.6148497 | 1 | TLR9    |
| Biological Process | GO:0032763 | regulation of mast cell cytokine production        | 1/2279 | 5/18866 | 0.4746987 | 0.6795154 | 0.6148497 | 1 | BCL10   |
| Biological Process | GO:0032776 | DNA methylation on cytosine                        | 1/2279 | 5/18866 | 0.4746987 | 0.6795154 | 0.6148497 | 1 | DNMT1   |

|                    |            |                                                               |        |         |           |           |           |   |          |
|--------------------|------------|---------------------------------------------------------------|--------|---------|-----------|-----------|-----------|---|----------|
| Biological Process | GO:0032849 | positive regulation of cellular pH reduction                  | 1/2279 | 5/18866 | 0.4746987 | 0.6795154 | 0.6148497 | 1 | UBE3A    |
| Biological Process | GO:0033087 | negative regulation of immature T cell proliferation          | 1/2279 | 5/18866 | 0.4746987 | 0.6795154 | 0.6148497 | 1 | TMEM131L |
| Biological Process | GO:0033132 | negative regulation of glucokinase activity                   | 1/2279 | 5/18866 | 0.4746987 | 0.6795154 | 0.6148497 | 1 | PRKN     |
| Biological Process | GO:0033152 | immunoglobulin V(D)J recombination                            | 1/2279 | 5/18866 | 0.4746987 | 0.6795154 | 0.6148497 | 1 | TCF3     |
| Biological Process | GO:0033184 | positive regulation of histone ubiquitination                 | 1/2279 | 5/18866 | 0.4746987 | 0.6795154 | 0.6148497 | 1 | RNF40    |
| Biological Process | GO:0033578 | protein glycosylation in Golgi                                | 1/2279 | 5/18866 | 0.4746987 | 0.6795154 | 0.6148497 | 1 | LMF1     |
| Biological Process | GO:0033591 | response to L-ascorbic acid                                   | 1/2279 | 5/18866 | 0.4746987 | 0.6795154 | 0.6148497 | 1 | CAT      |
| Biological Process | GO:0034136 | negative regulation of toll-like receptor 2 signaling pathway | 1/2279 | 5/18866 | 0.4746987 | 0.6795154 | 0.6148497 | 1 | TNFAIP3  |
| Biological Process | GO:0034155 | regulation of toll-like receptor 7 signaling pathway          | 1/2279 | 5/18866 | 0.4746987 | 0.6795154 | 0.6148497 | 1 | TREML4   |



|                    |            |                                                                |        |         |           |           |           |   |         |
|--------------------|------------|----------------------------------------------------------------|--------|---------|-----------|-----------|-----------|---|---------|
| Biological Process | GO:0034635 | glutathione transport                                          | 1/2279 | 5/18866 | 0.4746987 | 0.6795154 | 0.6148497 | 1 | ABCC1   |
| Biological Process | GO:0035426 | extracellular matrix-cell signaling                            | 1/2279 | 5/18866 | 0.4746987 | 0.6795154 | 0.6148497 | 1 | FER     |
| Biological Process | GO:0035443 | tripeptide transmembrane transport                             | 1/2279 | 5/18866 | 0.4746987 | 0.6795154 | 0.6148497 | 1 | ABCC1   |
| Biological Process | GO:0035483 | gastric emptying                                               | 1/2279 | 5/18866 | 0.4746987 | 0.6795154 | 0.6148497 | 1 | GHRL    |
| Biological Process | GO:0035509 | negative regulation of myosin-light-chain-phosphatase activity | 1/2279 | 5/18866 | 0.4746987 | 0.6795154 | 0.6148497 | 1 | TNF     |
| Biological Process | GO:0035513 | oxidative RNA demethylation                                    | 1/2279 | 5/18866 | 0.4746987 | 0.6795154 | 0.6148497 | 1 | FTO     |
| Biological Process | GO:0035523 | protein K29-linked deubiquitination                            | 1/2279 | 5/18866 | 0.4746987 | 0.6795154 | 0.6148497 | 1 | TNFAIP3 |
| Biological Process | GO:0035564 | regulation of kidney size                                      | 1/2279 | 5/18866 | 0.4746987 | 0.6795154 | 0.6148497 | 1 | PAX2    |
| Biological Process | GO:0035610 | protein side chain deglutamylation                             | 1/2279 | 5/18866 | 0.4746987 | 0.6795154 | 0.6148497 | 1 | AGBL2   |

|                    |            |                                                                                                      |        |         |           |           |           |   |         |
|--------------------|------------|------------------------------------------------------------------------------------------------------|--------|---------|-----------|-----------|-----------|---|---------|
| Biological Process | GO:0036066 | protein O-linked fucosylation                                                                        | 1/2279 | 5/18866 | 0.4746987 | 0.6795154 | 0.6148497 | 1 | SLC35C2 |
| Biological Process | GO:0036091 | positive regulation of transcription from RNA polymerase II promoter in response to oxidative stress | 1/2279 | 5/18866 | 0.4746987 | 0.6795154 | 0.6148497 | 1 | NFE2L2  |
| Biological Process | GO:0036100 | leukotriene catabolic process                                                                        | 1/2279 | 5/18866 | 0.4746987 | 0.6795154 | 0.6148497 | 1 | CYP4F3  |
| Biological Process | GO:0036101 | leukotriene B4 catabolic process                                                                     | 1/2279 | 5/18866 | 0.4746987 | 0.6795154 | 0.6148497 | 1 | CYP4F3  |
| Biological Process | GO:0036102 | leukotriene B4 metabolic process                                                                     | 1/2279 | 5/18866 | 0.4746987 | 0.6795154 | 0.6148497 | 1 | CYP4F3  |
| Biological Process | GO:0036135 | Schwann cell migration                                                                               | 1/2279 | 5/18866 | 0.4746987 | 0.6795154 | 0.6148497 | 1 | CERS2   |
| Biological Process | GO:0036301 | macrophage colony-stimulating factor production                                                      | 1/2279 | 5/18866 | 0.4746987 | 0.6795154 | 0.6148497 | 1 | FOXP1   |
| Biological Process | GO:0036414 | histone citrullination                                                                               | 1/2279 | 5/18866 | 0.4746987 | 0.6795154 | 0.6148497 | 1 | PADI2   |
| Biological Process | GO:0036476 | neuron death in response to hydrogen peroxide                                                        | 1/2279 | 5/18866 | 0.4746987 | 0.6795154 | 0.6148497 | 1 | IL10    |

|                    |            |                                                                   |        |         |           |           |           |   |        |
|--------------------|------------|-------------------------------------------------------------------|--------|---------|-----------|-----------|-----------|---|--------|
| Biological Process | GO:0042023 | DNA endoreduplication                                             | 1/2279 | 5/18866 | 0.4746987 | 0.6795154 | 0.6148497 | 1 | E2F7   |
| Biological Process | GO:0042036 | negative regulation of cytokine biosynthetic process              | 1/2279 | 5/18866 | 0.4746987 | 0.6795154 | 0.6148497 | 1 | ASB1   |
| Biological Process | GO:0042148 | strand invasion                                                   | 1/2279 | 5/18866 | 0.4746987 | 0.6795154 | 0.6148497 | 1 | DMC1   |
| Biological Process | GO:0042321 | negative regulation of circadian sleep/wake cycle, sleep          | 1/2279 | 5/18866 | 0.4746987 | 0.6795154 | 0.6148497 | 1 | GHRL   |
| Biological Process | GO:0042374 | phyloquinone metabolic process                                    | 1/2279 | 5/18866 | 0.4746987 | 0.6795154 | 0.6148497 | 1 | CYP4F3 |
| Biological Process | GO:0042376 | phyloquinone catabolic process                                    | 1/2279 | 5/18866 | 0.4746987 | 0.6795154 | 0.6148497 | 1 | CYP4F3 |
| Biological Process | GO:0042435 | indole-containing compound biosynthetic process                   | 1/2279 | 5/18866 | 0.4746987 | 0.6795154 | 0.6148497 | 1 | DDC    |
| Biological Process | GO:0042997 | negative regulation of Golgi to plasma membrane protein transport | 1/2279 | 5/18866 | 0.4746987 | 0.6795154 | 0.6148497 | 1 | CSK    |
| Biological Process | GO:0043400 | cortisol secretion                                                | 1/2279 | 5/18866 | 0.4746987 | 0.6795154 | 0.6148497 | 1 | GHRL   |

|                    |            |                                                            |        |         |           |           |           |   |         |
|--------------------|------------|------------------------------------------------------------|--------|---------|-----------|-----------|-----------|---|---------|
| Biological Process | GO:0043415 | positive regulation of skeletal muscle tissue regeneration | 1/2279 | 5/18866 | 0.4746987 | 0.6795154 | 0.6148497 | 1 | TGFBR2  |
| Biological Process | GO:0043932 | ossification involved in bone remodeling                   | 1/2279 | 5/18866 | 0.4746987 | 0.6795154 | 0.6148497 | 1 | TGFB1   |
| Biological Process | GO:0043972 | histone H3-K23 acetylation                                 | 1/2279 | 5/18866 | 0.4746987 | 0.6795154 | 0.6148497 | 1 | BRD1    |
| Biological Process | GO:0043987 | histone H3-S10 phosphorylation                             | 1/2279 | 5/18866 | 0.4746987 | 0.6795154 | 0.6148497 | 1 | RPS6KA4 |
| Biological Process | GO:0044206 | UMP salvage                                                | 1/2279 | 5/18866 | 0.4746987 | 0.6795154 | 0.6148497 | 1 | UCK2    |
| Biological Process | GO:0044314 | protein K27-linked ubiquitination                          | 1/2279 | 5/18866 | 0.4746987 | 0.6795154 | 0.6148497 | 1 | PRKN    |
| Biological Process | GO:0044571 | [2Fe-2S] cluster assembly                                  | 1/2279 | 5/18866 | 0.4746987 | 0.6795154 | 0.6148497 | 1 | HSCB    |
| Biological Process | GO:0045329 | carnitine biosynthetic process                             | 1/2279 | 5/18866 | 0.4746987 | 0.6795154 | 0.6148497 | 1 | ACADM   |
| Biological Process | GO:0045338 | farnesyl diphosphate metabolic process                     | 1/2279 | 5/18866 | 0.4746987 | 0.6795154 | 0.6148497 | 1 | HMGCS1  |

|                    |            |                                                         |        |         |           |           |           |   |       |
|--------------------|------------|---------------------------------------------------------|--------|---------|-----------|-----------|-----------|---|-------|
| Biological Process | GO:0045345 | positive regulation of MHC class I biosynthetic process | 1/2279 | 5/18866 | 0.4746987 | 0.6795154 | 0.6148497 | 1 | NLRC5 |
| Biological Process | GO:0045578 | negative regulation of B cell differentiation           | 1/2279 | 5/18866 | 0.4746987 | 0.6795154 | 0.6148497 | 1 | INHBA |
| Biological Process | GO:0045794 | negative regulation of cell volume                      | 1/2279 | 5/18866 | 0.4746987 | 0.6795154 | 0.6148497 | 1 | ANO6  |
| Biological Process | GO:0045875 | negative regulation of sister chromatid cohesion        | 1/2279 | 5/18866 | 0.4746987 | 0.6795154 | 0.6148497 | 1 | TNKS  |
| Biological Process | GO:0046015 | regulation of transcription by glucose                  | 1/2279 | 5/18866 | 0.4746987 | 0.6795154 | 0.6148497 | 1 | USF2  |
| Biological Process | GO:0046060 | dATP metabolic process                                  | 1/2279 | 5/18866 | 0.4746987 | 0.6795154 | 0.6148497 | 1 | GUK1  |
| Biological Process | GO:0046069 | cGMP catabolic process                                  | 1/2279 | 5/18866 | 0.4746987 | 0.6795154 | 0.6148497 | 1 | PDE9A |
| Biological Process | GO:0046078 | dUMP metabolic process                                  | 1/2279 | 5/18866 | 0.4746987 | 0.6795154 | 0.6148497 | 1 | DCTD  |
| Biological Process | GO:0046219 | indolalkylamine biosynthetic process                    | 1/2279 | 5/18866 | 0.4746987 | 0.6795154 | 0.6148497 | 1 | DDC   |

|                    |            |                                                                 |        |         |           |           |           |   |        |
|--------------------|------------|-----------------------------------------------------------------|--------|---------|-----------|-----------|-----------|---|--------|
| Biological Process | GO:0046351 | disaccharide biosynthetic process                               | 1/2279 | 5/18866 | 0.4746987 | 0.6795154 | 0.6148497 | 1 | SLC2A1 |
| Biological Process | GO:0046490 | isopentenyl diphosphate metabolic process                       | 1/2279 | 5/18866 | 0.4746987 | 0.6795154 | 0.6148497 | 1 | IDI1   |
| Biological Process | GO:0046666 | retinal cell programmed cell death                              | 1/2279 | 5/18866 | 0.4746987 | 0.6795154 | 0.6148497 | 1 | BCL2   |
| Biological Process | GO:0048386 | positive regulation of retinoic acid receptor signaling pathway | 1/2279 | 5/18866 | 0.4746987 | 0.6795154 | 0.6148497 | 1 | CTBP2  |
| Biological Process | GO:0048550 | negative regulation of pinocytosis                              | 1/2279 | 5/18866 | 0.4746987 | 0.6795154 | 0.6148497 | 1 | NR1H2  |
| Biological Process | GO:0048631 | regulation of skeletal muscle tissue growth                     | 1/2279 | 5/18866 | 0.4746987 | 0.6795154 | 0.6148497 | 1 | DLL1   |
| Biological Process | GO:0048790 | maintenance of presynaptic active zone structure                | 1/2279 | 5/18866 | 0.4746987 | 0.6795154 | 0.6148497 | 1 | CTBP2  |
| Biological Process | GO:0050747 | positive regulation of lipoprotein metabolic process            | 1/2279 | 5/18866 | 0.4746987 | 0.6795154 | 0.6148497 | 1 | SVIP   |
| Biological Process | GO:0050748 | negative regulation of lipoprotein metabolic process            | 1/2279 | 5/18866 | 0.4746987 | 0.6795154 | 0.6148497 | 1 | ITGB3  |

|                    |            |                                                |        |         |           |           |           |   |        |
|--------------------|------------|------------------------------------------------|--------|---------|-----------|-----------|-----------|---|--------|
| Biological Process | GO:0050955 | thermoception                                  | 1/2279 | 5/18866 | 0.4746987 | 0.6795154 | 0.6148497 | 1 | WDR47  |
| Biological Process | GO:0051097 | negative regulation of helicase activity       | 1/2279 | 5/18866 | 0.4746987 | 0.6795154 | 0.6148497 | 1 | MCM2   |
| Biological Process | GO:0051140 | regulation of NK T cell proliferation          | 1/2279 | 5/18866 | 0.4746987 | 0.6795154 | 0.6148497 | 1 | ZBTB7B |
| Biological Process | GO:0051295 | establishment of meiotic spindle localization  | 1/2279 | 5/18866 | 0.4746987 | 0.6795154 | 0.6148497 | 1 | MYH9   |
| Biological Process | GO:0051410 | detoxification of nitrogen compound            | 1/2279 | 5/18866 | 0.4746987 | 0.6795154 | 0.6148497 | 1 | MTARC1 |
| Biological Process | GO:0051414 | response to cortisol                           | 1/2279 | 5/18866 | 0.4746987 | 0.6795154 | 0.6148497 | 1 | SLIT3  |
| Biological Process | GO:0051461 | positive regulation of corticotropin secretion | 1/2279 | 5/18866 | 0.4746987 | 0.6795154 | 0.6148497 | 1 | GHRL   |
| Biological Process | GO:0051462 | regulation of cortisol secretion               | 1/2279 | 5/18866 | 0.4746987 | 0.6795154 | 0.6148497 | 1 | GHRL   |
| Biological Process | GO:0051582 | positive regulation of neurotransmitter uptake | 1/2279 | 5/18866 | 0.4746987 | 0.6795154 | 0.6148497 | 1 | PRKN   |

|                    |            |                                                                            |        |         |           |           |           |   |         |
|--------------------|------------|----------------------------------------------------------------------------|--------|---------|-----------|-----------|-----------|---|---------|
| Biological Process | GO:0051599 | response to hydrostatic pressure                                           | 1/2279 | 5/18866 | 0.4746987 | 0.6795154 | 0.6148497 | 1 | NTRK1   |
| Biological Process | GO:0051725 | protein de-ADP-ribosylation                                                | 1/2279 | 5/18866 | 0.4746987 | 0.6795154 | 0.6148497 | 1 | MACROD1 |
| Biological Process | GO:0051754 | meiotic sister chromatid cohesion, centromeric                             | 1/2279 | 5/18866 | 0.4746987 | 0.6795154 | 0.6148497 | 1 | PPP2R1A |
| Biological Process | GO:0051793 | medium-chain fatty acid catabolic process                                  | 1/2279 | 5/18866 | 0.4746987 | 0.6795154 | 0.6148497 | 1 | ACADM   |
| Biological Process | GO:0051799 | negative regulation of hair follicle development                           | 1/2279 | 5/18866 | 0.4746987 | 0.6795154 | 0.6148497 | 1 | CDH3    |
| Biological Process | GO:0052405 | negative regulation by host of symbiont molecular function                 | 1/2279 | 5/18866 | 0.4746987 | 0.6795154 | 0.6148497 | 1 | SFTPD   |
| Biological Process | GO:0060266 | negative regulation of respiratory burst involved in inflammatory response | 1/2279 | 5/18866 | 0.4746987 | 0.6795154 | 0.6148497 | 1 | GRN     |
| Biological Process | GO:0060509 | type I pneumocyte differentiation                                          | 1/2279 | 5/18866 | 0.4746987 | 0.6795154 | 0.6148497 | 1 | CREB1   |
| Biological Process | GO:0060591 | chondroblast differentiation                                               | 1/2279 | 5/18866 | 0.4746987 | 0.6795154 | 0.6148497 | 1 | RARA    |



|                    |            |                                                                        |        |         |           |           |           |   |        |
|--------------------|------------|------------------------------------------------------------------------|--------|---------|-----------|-----------|-----------|---|--------|
| Biological Process | GO:0060664 | epithelial cell proliferation involved in salivary gland morphogenesis | 1/2279 | 5/18866 | 0.4746987 | 0.6795154 | 0.6148497 | 1 | TNF    |
| Biological Process | GO:0060718 | chorionic trophoblast cell differentiation                             | 1/2279 | 5/18866 | 0.4746987 | 0.6795154 | 0.6148497 | 1 | E2F7   |
| Biological Process | GO:0060789 | hair follicle placode formation                                        | 1/2279 | 5/18866 | 0.4746987 | 0.6795154 | 0.6148497 | 1 | HDAC1  |
| Biological Process | GO:0060920 | cardiac pacemaker cell differentiation                                 | 1/2279 | 5/18866 | 0.4746987 | 0.6795154 | 0.6148497 | 1 | MAML1  |
| Biological Process | GO:0061088 | regulation of sequestering of zinc ion                                 | 1/2279 | 5/18866 | 0.4746987 | 0.6795154 | 0.6148497 | 1 | AP3D1  |
| Biological Process | GO:0061197 | fungiform papilla morphogenesis                                        | 1/2279 | 5/18866 | 0.4746987 | 0.6795154 | 0.6148497 | 1 | HDAC1  |
| Biological Process | GO:0061302 | smooth muscle cell-matrix adhesion                                     | 1/2279 | 5/18866 | 0.4746987 | 0.6795154 | 0.6148497 | 1 | PLAU   |
| Biological Process | GO:0061343 | cell adhesion involved in heart morphogenesis                          | 1/2279 | 5/18866 | 0.4746987 | 0.6795154 | 0.6148497 | 1 | TGFBR2 |
| Biological Process | GO:0061484 | hematopoietic stem cell homeostasis                                    | 1/2279 | 5/18866 | 0.4746987 | 0.6795154 | 0.6148497 | 1 | UBAP2L |

|                    |            |                                                                                       |        |         |           |           |           |   |         |
|--------------------|------------|---------------------------------------------------------------------------------------|--------|---------|-----------|-----------|-----------|---|---------|
| Biological Process | GO:0061551 | trigeminal ganglion development                                                       | 1/2279 | 5/18866 | 0.4746987 | 0.6795154 | 0.6148497 | 1 | NRP2    |
| Biological Process | GO:0061624 | fructose catabolic process to hydroxyacetone phosphate and glyceraldehyde-3-phosphate | 1/2279 | 5/18866 | 0.4746987 | 0.6795154 | 0.6148497 | 1 | GLYCK   |
| Biological Process | GO:0062028 | regulation of stress granule assembly                                                 | 1/2279 | 5/18866 | 0.4746987 | 0.6795154 | 0.6148497 | 1 | PRKAA1  |
| Biological Process | GO:0070072 | vacuolar proton-transporting V-type ATPase complex assembly                           | 1/2279 | 5/18866 | 0.4746987 | 0.6795154 | 0.6148497 | 1 | TM9SF4  |
| Biological Process | GO:0070120 | ciliary neurotrophic factor-mediated signaling pathway                                | 1/2279 | 5/18866 | 0.4746987 | 0.6795154 | 0.6148497 | 1 | IL6R    |
| Biological Process | GO:0070245 | positive regulation of thymocyte apoptotic process                                    | 1/2279 | 5/18866 | 0.4746987 | 0.6795154 | 0.6148497 | 1 | ZC3H8   |
| Biological Process | GO:0070427 | nucleotide-binding oligomerization domain containing 1 signaling pathway              | 1/2279 | 5/18866 | 0.4746987 | 0.6795154 | 0.6148497 | 1 | TNFAIP3 |
| Biological Process | GO:0070640 | vitamin D3 metabolic process                                                          | 1/2279 | 5/18866 | 0.4746987 | 0.6795154 | 0.6148497 | 1 | FGFR1   |
| Biological Process | GO:0070662 | mast cell proliferation                                                               | 1/2279 | 5/18866 | 0.4746987 | 0.6795154 | 0.6148497 | 1 | BLK     |

|                    |            |                                                                                           |        |         |           |           |           |   |          |
|--------------------|------------|-------------------------------------------------------------------------------------------|--------|---------|-----------|-----------|-----------|---|----------|
| Biological Process | GO:0070934 | CRD-mediated mRNA stabilization                                                           | 1/2279 | 5/18866 | 0.4746987 | 0.6795154 | 0.6148497 | 1 | SYNCRIP  |
| Biological Process | GO:0070945 | neutrophil-mediated killing of gram-negative bacterium                                    | 1/2279 | 5/18866 | 0.4746987 | 0.6795154 | 0.6148497 | 1 | ELANE    |
| Biological Process | GO:0070948 | regulation of neutrophil mediated cytotoxicity                                            | 1/2279 | 5/18866 | 0.4746987 | 0.6795154 | 0.6148497 | 1 | DNASE1L3 |
| Biological Process | GO:0071332 | cellular response to fructose stimulus                                                    | 1/2279 | 5/18866 | 0.4746987 | 0.6795154 | 0.6148497 | 1 | SLC2A5   |
| Biological Process | GO:0071502 | cellular response to temperature stimulus                                                 | 1/2279 | 5/18866 | 0.4746987 | 0.6795154 | 0.6148497 | 1 | TRPM2    |
| Biological Process | GO:0071543 | diphosphoinositol polyphosphate metabolic process                                         | 1/2279 | 5/18866 | 0.4746987 | 0.6795154 | 0.6148497 | 1 | NUDT3    |
| Biological Process | GO:0071557 | histone H3-K27 demethylation                                                              | 1/2279 | 5/18866 | 0.4746987 | 0.6795154 | 0.6148497 | 1 | KDM7A    |
| Biological Process | GO:0071878 | negative regulation of adenylate cyclase-activating adrenergic receptor signaling pathway | 1/2279 | 5/18866 | 0.4746987 | 0.6795154 | 0.6148497 | 1 | GNAI2    |
| Biological Process | GO:0072025 | distal convoluted tubule development                                                      | 1/2279 | 5/18866 | 0.4746987 | 0.6795154 | 0.6148497 | 1 | PAX2     |

|                    |            |                                                           |        |         |           |           |           |   |        |
|--------------------|------------|-----------------------------------------------------------|--------|---------|-----------|-----------|-----------|---|--------|
| Biological Process | GO:0072162 | metanephric mesenchymal cell differentiation              | 1/2279 | 5/18866 | 0.4746987 | 0.6795154 | 0.6148497 | 1 | PAX2   |
| Biological Process | GO:0072179 | nephric duct formation                                    | 1/2279 | 5/18866 | 0.4746987 | 0.6795154 | 0.6148497 | 1 | PAX2   |
| Biological Process | GO:0072221 | metanephric distal convoluted tubule development          | 1/2279 | 5/18866 | 0.4746987 | 0.6795154 | 0.6148497 | 1 | PAX2   |
| Biological Process | GO:0072300 | positive regulation of metanephric glomerulus development | 1/2279 | 5/18866 | 0.4746987 | 0.6795154 | 0.6148497 | 1 | PAX2   |
| Biological Process | GO:0072344 | rescue of stalled ribosome                                | 1/2279 | 5/18866 | 0.4746987 | 0.6795154 | 0.6148497 | 1 | ZNF598 |
| Biological Process | GO:0072733 | response to staurosporine                                 | 1/2279 | 5/18866 | 0.4746987 | 0.6795154 | 0.6148497 | 1 | CASP7  |
| Biological Process | GO:0072734 | cellular response to staurosporine                        | 1/2279 | 5/18866 | 0.4746987 | 0.6795154 | 0.6148497 | 1 | CASP7  |
| Biological Process | GO:0080144 | amino acid homeostasis                                    | 1/2279 | 5/18866 | 0.4746987 | 0.6795154 | 0.6148497 | 1 | KCTD7  |
| Biological Process | GO:0080184 | response to phenylpropanoid                               | 1/2279 | 5/18866 | 0.4746987 | 0.6795154 | 0.6148497 | 1 | CAT    |

|                    |            |                                                                                              |        |         |           |           |           |   |         |
|--------------------|------------|----------------------------------------------------------------------------------------------|--------|---------|-----------|-----------|-----------|---|---------|
| Biological Process | GO:0086046 | membrane depolarization during SA node cell action potential                                 | 1/2279 | 5/18866 | 0.4746987 | 0.6795154 | 0.6148497 | 1 | ANK2    |
| Biological Process | GO:0090063 | positive regulation of microtubule nucleation                                                | 1/2279 | 5/18866 | 0.4746987 | 0.6795154 | 0.6148497 | 1 | DCTN1   |
| Biological Process | GO:0090080 | positive regulation of MAPKKK cascade by fibroblast growth factor receptor signaling pathway | 1/2279 | 5/18866 | 0.4746987 | 0.6795154 | 0.6148497 | 1 | FGFR1   |
| Biological Process | GO:0090271 | positive regulation of fibroblast growth factor production                                   | 1/2279 | 5/18866 | 0.4746987 | 0.6795154 | 0.6148497 | 1 | CCM2L   |
| Biological Process | GO:0090289 | regulation of osteoclast proliferation                                                       | 1/2279 | 5/18866 | 0.4746987 | 0.6795154 | 0.6148497 | 1 | TNFAIP3 |
| Biological Process | GO:0090660 | cerebrospinal fluid circulation                                                              | 1/2279 | 5/18866 | 0.4746987 | 0.6795154 | 0.6148497 | 1 | KATNIP  |
| Biological Process | GO:0097039 | protein linear polyubiquitination                                                            | 1/2279 | 5/18866 | 0.4746987 | 0.6795154 | 0.6148497 | 1 | PRKN    |
| Biological Process | GO:0097176 | epoxide metabolic process                                                                    | 1/2279 | 5/18866 | 0.4746987 | 0.6795154 | 0.6148497 | 1 | EPHX1   |
| Biological Process | GO:0097350 | neutrophil clearance                                                                         | 1/2279 | 5/18866 | 0.4746987 | 0.6795154 | 0.6148497 | 1 | CCR2    |

|                    |            |                                                                                                            |        |         |           |           |           |   |        |
|--------------------|------------|------------------------------------------------------------------------------------------------------------|--------|---------|-----------|-----------|-----------|---|--------|
| Biological Process | GO:0097360 | chorionic trophoblast cell proliferation                                                                   | 1/2279 | 5/18866 | 0.4746987 | 0.6795154 | 0.6148497 | 1 | NODAL  |
| Biological Process | GO:0098708 | glucose import across plasma membrane                                                                      | 1/2279 | 5/18866 | 0.4746987 | 0.6795154 | 0.6148497 | 1 | SLC2A1 |
| Biological Process | GO:0098735 | positive regulation of the force of heart contraction                                                      | 1/2279 | 5/18866 | 0.4746987 | 0.6795154 | 0.6148497 | 1 | SLC8A1 |
| Biological Process | GO:0098920 | retrograde trans-synaptic signaling by lipid                                                               | 1/2279 | 5/18866 | 0.4746987 | 0.6795154 | 0.6148497 | 1 | PLCB1  |
| Biological Process | GO:0098921 | retrograde trans-synaptic signaling by endocannabinoid                                                     | 1/2279 | 5/18866 | 0.4746987 | 0.6795154 | 0.6148497 | 1 | PLCB1  |
| Biological Process | GO:0100012 | regulation of heart induction by canonical Wnt signaling pathway                                           | 1/2279 | 5/18866 | 0.4746987 | 0.6795154 | 0.6148497 | 1 | WNT11  |
| Biological Process | GO:0140192 | regulation of adenylate cyclase-activating adrenergic receptor signaling pathway involved in heart process | 1/2279 | 5/18866 | 0.4746987 | 0.6795154 | 0.6148497 | 1 | GNAI2  |
| Biological Process | GO:1900145 | regulation of nodal signaling pathway involved in determination of left/right asymmetry                    | 1/2279 | 5/18866 | 0.4746987 | 0.6795154 | 0.6148497 | 1 | NODAL  |
| Biological Process | GO:1900147 | regulation of Schwann cell migration                                                                       | 1/2279 | 5/18866 | 0.4746987 | 0.6795154 | 0.6148497 | 1 | CERS2  |

|                    |            |                                                                                                          |        |         |           |           |           |   |         |
|--------------------|------------|----------------------------------------------------------------------------------------------------------|--------|---------|-----------|-----------|-----------|---|---------|
| Biological Process | GO:1900158 | negative regulation of bone mineralization involved in bone maturation                                   | 1/2279 | 5/18866 | 0.4746987 | 0.6795154 | 0.6148497 | 1 | RFLNA   |
| Biological Process | GO:1900175 | regulation of nodal signaling pathway involved in determination of lateral mesoderm left/right asymmetry | 1/2279 | 5/18866 | 0.4746987 | 0.6795154 | 0.6148497 | 1 | NODAL   |
| Biological Process | GO:1900226 | negative regulation of NLRP3 inflammasome complex assembly                                               | 1/2279 | 5/18866 | 0.4746987 | 0.6795154 | 0.6148497 | 1 | MEFV    |
| Biological Process | GO:1900368 | regulation of RNA interference                                                                           | 1/2279 | 5/18866 | 0.4746987 | 0.6795154 | 0.6148497 | 1 | RMRP    |
| Biological Process | GO:1901078 | negative regulation of relaxation of muscle                                                              | 1/2279 | 5/18866 | 0.4746987 | 0.6795154 | 0.6148497 | 1 | PDE4D   |
| Biological Process | GO:1901097 | negative regulation of autophagosome maturation                                                          | 1/2279 | 5/18866 | 0.4746987 | 0.6795154 | 0.6148497 | 1 | CLEC16A |
| Biological Process | GO:1901162 | primary amino compound biosynthetic process                                                              | 1/2279 | 5/18866 | 0.4746987 | 0.6795154 | 0.6148497 | 1 | DDC     |
| Biological Process | GO:1901256 | regulation of macrophage colony-stimulating factor production                                            | 1/2279 | 5/18866 | 0.4746987 | 0.6795154 | 0.6148497 | 1 | FOXP1   |
| Biological Process | GO:1901382 | regulation of chorionic trophoblast cell proliferation                                                   | 1/2279 | 5/18866 | 0.4746987 | 0.6795154 | 0.6148497 | 1 | NODAL   |

|                    |            |                                                                    |        |         |           |           |           |   |        |
|--------------------|------------|--------------------------------------------------------------------|--------|---------|-----------|-----------|-----------|---|--------|
| Biological Process | GO:1901490 | regulation of lymphangiogenesis                                    | 1/2279 | 5/18866 | 0.4746987 | 0.6795154 | 0.6148497 | 1 | VASH1  |
| Biological Process | GO:1901608 | regulation of vesicle transport along microtubule                  | 1/2279 | 5/18866 | 0.4746987 | 0.6795154 | 0.6148497 | 1 | CNIH2  |
| Biological Process | GO:1901662 | quinone catabolic process                                          | 1/2279 | 5/18866 | 0.4746987 | 0.6795154 | 0.6148497 | 1 | CYP4F3 |
| Biological Process | GO:1901843 | positive regulation of high voltage-gated calcium channel activity | 1/2279 | 5/18866 | 0.4746987 | 0.6795154 | 0.6148497 | 1 | FGF14  |
| Biological Process | GO:1901906 | diadenosine pentaphosphate metabolic process                       | 1/2279 | 5/18866 | 0.4746987 | 0.6795154 | 0.6148497 | 1 | NUDT3  |
| Biological Process | GO:1901907 | diadenosine pentaphosphate catabolic process                       | 1/2279 | 5/18866 | 0.4746987 | 0.6795154 | 0.6148497 | 1 | NUDT3  |
| Biological Process | GO:1901908 | diadenosine hexaphosphate metabolic process                        | 1/2279 | 5/18866 | 0.4746987 | 0.6795154 | 0.6148497 | 1 | NUDT3  |
| Biological Process | GO:1901909 | diadenosine hexaphosphate catabolic process                        | 1/2279 | 5/18866 | 0.4746987 | 0.6795154 | 0.6148497 | 1 | NUDT3  |
| Biological Process | GO:1901910 | adenosine 5'-(hexahydrogen pentaphosphate) metabolic process       | 1/2279 | 5/18866 | 0.4746987 | 0.6795154 | 0.6148497 | 1 | NUDT3  |



|                    |            |                                                                                            |        |         |           |           |           |   |          |
|--------------------|------------|--------------------------------------------------------------------------------------------|--------|---------|-----------|-----------|-----------|---|----------|
| Biological Process | GO:1901911 | adenosine 5'-(hexahydrogen pentaphosphate) catabolic process                               | 1/2279 | 5/18866 | 0.4746987 | 0.6795154 | 0.6148497 | 1 | NUDT3    |
| Biological Process | GO:1901995 | positive regulation of meiotic cell cycle phase transition                                 | 1/2279 | 5/18866 | 0.4746987 | 0.6795154 | 0.6148497 | 1 | CDC25A   |
| Biological Process | GO:1902031 | regulation of NADP metabolic process                                                       | 1/2279 | 5/18866 | 0.4746987 | 0.6795154 | 0.6148497 | 1 | PGAM1    |
| Biological Process | GO:1902219 | negative regulation of intrinsic apoptotic signaling pathway in response to osmotic stress | 1/2279 | 5/18866 | 0.4746987 | 0.6795154 | 0.6148497 | 1 | ARHGEF2  |
| Biological Process | GO:1902292 | cell cycle DNA replication initiation                                                      | 1/2279 | 5/18866 | 0.4746987 | 0.6795154 | 0.6148497 | 1 | MCM2     |
| Biological Process | GO:1902308 | regulation of peptidyl-serine dephosphorylation                                            | 1/2279 | 5/18866 | 0.4746987 | 0.6795154 | 0.6148497 | 1 | PPP1R16B |
| Biological Process | GO:1902315 | nuclear cell cycle DNA replication initiation                                              | 1/2279 | 5/18866 | 0.4746987 | 0.6795154 | 0.6148497 | 1 | MCM2     |
| Biological Process | GO:1902623 | negative regulation of neutrophil migration                                                | 1/2279 | 5/18866 | 0.4746987 | 0.6795154 | 0.6148497 | 1 | C5AR2    |
| Biological Process | GO:1902732 | positive regulation of chondrocyte proliferation                                           | 1/2279 | 5/18866 | 0.4746987 | 0.6795154 | 0.6148497 | 1 | LTF      |

|                    |            |                                                                                              |        |         |           |           |           |   |        |
|--------------------|------------|----------------------------------------------------------------------------------------------|--------|---------|-----------|-----------|-----------|---|--------|
| Biological Process | GO:1902816 | regulation of protein localization to microtubule                                            | 1/2279 | 5/18866 | 0.4746987 | 0.6795154 | 0.6148497 | 1 | MAP1A  |
| Biological Process | GO:1902817 | negative regulation of protein localization to microtubule                                   | 1/2279 | 5/18866 | 0.4746987 | 0.6795154 | 0.6148497 | 1 | MAP1A  |
| Biological Process | GO:1902975 | mitotic DNA replication initiation                                                           | 1/2279 | 5/18866 | 0.4746987 | 0.6795154 | 0.6148497 | 1 | MCM2   |
| Biological Process | GO:1903207 | regulation of hydrogen peroxide-induced neuron death                                         | 1/2279 | 5/18866 | 0.4746987 | 0.6795154 | 0.6148497 | 1 | IL10   |
| Biological Process | GO:1903208 | negative regulation of hydrogen peroxide-induced neuron death                                | 1/2279 | 5/18866 | 0.4746987 | 0.6795154 | 0.6148497 | 1 | IL10   |
| Biological Process | GO:1903224 | regulation of endodermal cell differentiation                                                | 1/2279 | 5/18866 | 0.4746987 | 0.6795154 | 0.6148497 | 1 | COL5A1 |
| Biological Process | GO:1903300 | negative regulation of hexokinase activity                                                   | 1/2279 | 5/18866 | 0.4746987 | 0.6795154 | 0.6148497 | 1 | PRKN   |
| Biological Process | GO:1903377 | negative regulation of oxidative stress-induced neuron intrinsic apoptotic signaling pathway | 1/2279 | 5/18866 | 0.4746987 | 0.6795154 | 0.6148497 | 1 | PRKN   |
| Biological Process | GO:1903391 | regulation of adherens junction organization                                                 | 1/2279 | 5/18866 | 0.4746987 | 0.6795154 | 0.6148497 | 1 | ADD1   |

|                    |            |                                                                                                                                    |        |         |           |           |           |   |         |
|--------------------|------------|------------------------------------------------------------------------------------------------------------------------------------|--------|---------|-----------|-----------|-----------|---|---------|
| Biological Process | GO:1903416 | response to glycoside                                                                                                              | 1/2279 | 5/18866 | 0.4746987 | 0.6795154 | 0.6148497 | 1 | CHEK2   |
| Biological Process | GO:1903625 | negative regulation of DNA catabolic process                                                                                       | 1/2279 | 5/18866 | 0.4746987 | 0.6795154 | 0.6148497 | 1 | PAM16   |
| Biological Process | GO:1903760 | regulation of voltage-gated potassium channel activity involved in ventricular cardiac muscle cell action potential repolarization | 1/2279 | 5/18866 | 0.4746987 | 0.6795154 | 0.6148497 | 1 | NOS1AP  |
| Biological Process | GO:1903847 | regulation of aorta morphogenesis                                                                                                  | 1/2279 | 5/18866 | 0.4746987 | 0.6795154 | 0.6148497 | 1 | NOTCH1  |
| Biological Process | GO:1903898 | negative regulation of PERK-mediated unfolded protein response                                                                     | 1/2279 | 5/18866 | 0.4746987 | 0.6795154 | 0.6148497 | 1 | NCK2    |
| Biological Process | GO:1903976 | negative regulation of glial cell migration                                                                                        | 1/2279 | 5/18866 | 0.4746987 | 0.6795154 | 0.6148497 | 1 | CERS2   |
| Biological Process | GO:1904398 | positive regulation of neuromuscular junction development                                                                          | 1/2279 | 5/18866 | 0.4746987 | 0.6795154 | 0.6148497 | 1 | DCTN1   |
| Biological Process | GO:1904447 | folate import across plasma membrane                                                                                               | 1/2279 | 5/18866 | 0.4746987 | 0.6795154 | 0.6148497 | 1 | SLC19A1 |
| Biological Process | GO:1904760 | regulation of myofibroblast differentiation                                                                                        | 1/2279 | 5/18866 | 0.4746987 | 0.6795154 | 0.6148497 | 1 | RB1     |

|                    |            |                                                               |        |         |           |           |           |   |       |
|--------------------|------------|---------------------------------------------------------------|--------|---------|-----------|-----------|-----------|---|-------|
| Biological Process | GO:1904885 | beta-catenin destruction complex assembly                     | 1/2279 | 5/18866 | 0.4746987 | 0.6795154 | 0.6148497 | 1 | AXIN1 |
| Biological Process | GO:1904970 | brush border assembly                                         | 1/2279 | 5/18866 | 0.4746987 | 0.6795154 | 0.6148497 | 1 | CDHR2 |
| Biological Process | GO:1904997 | regulation of leukocyte adhesion to arterial endothelial cell | 1/2279 | 5/18866 | 0.4746987 | 0.6795154 | 0.6148497 | 1 | TNF   |
| Biological Process | GO:1905279 | regulation of retrograde transport, endosome to Golgi         | 1/2279 | 5/18866 | 0.4746987 | 0.6795154 | 0.6148497 | 1 | PRKN  |
| Biological Process | GO:1905333 | regulation of gastric motility                                | 1/2279 | 5/18866 | 0.4746987 | 0.6795154 | 0.6148497 | 1 | GHRL  |
| Biological Process | GO:1905774 | regulation of DNA helicase activity                           | 1/2279 | 5/18866 | 0.4746987 | 0.6795154 | 0.6148497 | 1 | MCM2  |
| Biological Process | GO:1905867 | epididymis development                                        | 1/2279 | 5/18866 | 0.4746987 | 0.6795154 | 0.6148497 | 1 | PTPN6 |
| Biological Process | GO:1905907 | negative regulation of amyloid fibril formation               | 1/2279 | 5/18866 | 0.4746987 | 0.6795154 | 0.6148497 | 1 | CLU   |
| Biological Process | GO:1990049 | retrograde neuronal dense core vesicle transport              | 1/2279 | 5/18866 | 0.4746987 | 0.6795154 | 0.6148497 | 1 | KIF1B |

|                    |            |                                                                            |        |         |           |           |           |   |        |
|--------------------|------------|----------------------------------------------------------------------------|--------|---------|-----------|-----------|-----------|---|--------|
| Biological Process | GO:1990051 | activation of protein kinase C activity                                    | 1/2279 | 5/18866 | 0.4746987 | 0.6795154 | 0.6148497 | 1 | PHB    |
| Biological Process | GO:1990481 | mRNA pseudouridine synthesis                                               | 1/2279 | 5/18866 | 0.4746987 | 0.6795154 | 0.6148497 | 1 | PUS7   |
| Biological Process | GO:1990962 | xenobiotic transport across blood-brain barrier                            | 1/2279 | 5/18866 | 0.4746987 | 0.6795154 | 0.6148497 | 1 | ABCC2  |
| Biological Process | GO:2000002 | negative regulation of DNA damage checkpoint                               | 1/2279 | 5/18866 | 0.4746987 | 0.6795154 | 0.6148497 | 1 | CHEK2  |
| Biological Process | GO:2000118 | regulation of sodium-dependent phosphate transport                         | 1/2279 | 5/18866 | 0.4746987 | 0.6795154 | 0.6148497 | 1 | CEBPB  |
| Biological Process | GO:2000301 | negative regulation of synaptic vesicle exocytosis                         | 1/2279 | 5/18866 | 0.4746987 | 0.6795154 | 0.6148497 | 1 | RAP1B  |
| Biological Process | GO:2000504 | positive regulation of blood vessel remodeling                             | 1/2279 | 5/18866 | 0.4746987 | 0.6795154 | 0.6148497 | 1 | MIR143 |
| Biological Process | GO:2000671 | regulation of motor neuron apoptotic process                               | 1/2279 | 5/18866 | 0.4746987 | 0.6795154 | 0.6148497 | 1 | CRLF1  |
| Biological Process | GO:2000724 | positive regulation of cardiac vascular smooth muscle cell differentiation | 1/2279 | 5/18866 | 0.4746987 | 0.6795154 | 0.6148497 | 1 | MIR145 |

|                    |            |                                                          |         |           |           |           |           |    |  |                                                                                                                                              |
|--------------------|------------|----------------------------------------------------------|---------|-----------|-----------|-----------|-----------|----|--|----------------------------------------------------------------------------------------------------------------------------------------------|
| Biological Process | GO:2000821 | regulation of grooming behavior                          | 1/2279  | 5/18866   | 0.4746987 | 0.6795154 | 0.6148497 | 1  |  | NRXN1                                                                                                                                        |
| Biological Process | GO:2000851 | positive regulation of glucocorticoid secretion          | 1/2279  | 5/18866   | 0.4746987 | 0.6795154 | 0.6148497 | 1  |  | GHRL                                                                                                                                         |
| Biological Process | GO:2001023 | regulation of response to drug                           | 1/2279  | 5/18866   | 0.4746987 | 0.6795154 | 0.6148497 | 1  |  | NCOA1                                                                                                                                        |
| Biological Process | GO:2001166 | regulation of histone H2B ubiquitination                 | 1/2279  | 5/18866   | 0.4746987 | 0.6795154 | 0.6148497 | 1  |  | RNF40                                                                                                                                        |
| Biological Process | GO:2001205 | negative regulation of osteoclast development            | 1/2279  | 5/18866   | 0.4746987 | 0.6795154 | 0.6148497 | 1  |  | LTF                                                                                                                                          |
| Biological Process | GO:2001245 | regulation of phosphatidylcholine biosynthetic process   | 1/2279  | 5/18866   | 0.4746987 | 0.6795154 | 0.6148497 | 1  |  | LPCAT1                                                                                                                                       |
| Biological Process | GO:0009880 | embryonic pattern specification                          | 9/2279  | 70/18866  | 0.4749157 | 0.6795154 | 0.6148497 | 9  |  | NRP2/SMAD3/ZBTB16/DLL1/PCSK6/MEIS2/MEIS1/TMED2/NODAL                                                                                         |
| Biological Process | GO:0050771 | negative regulation of axonogenesis                      | 9/2279  | 70/18866  | 0.4749157 | 0.6795154 | 0.6148497 | 9  |  | SEMA6B/SEMA4A/RTN4/SEMA4B/IFRD1/SYNGAP1/SEMA4D/CDKL3/SPART                                                                                   |
| Biological Process | GO:0019884 | antigen processing and presentation of exogenous antigen | 23/2279 | 185/18866 | 0.4750141 | 0.6795154 | 0.6148497 | 23 |  | HLA-DMB/DCTN1/CALR/AP2A1/LNPEP/NCF4/DNM2/DYNC1H1/CTSD/HLA-C/HLA-F/NCF2/ITGB5/AP1B1/DCTN2/SEC13/PSMF1/SEC24C/PSMB7/KIFAP3/AP3D1/SEC31A/PSMD13 |

|                    |            |                                                                            |         |           |           |           |           |    |                                                                                                                                                                                                                                                                                                 |
|--------------------|------------|----------------------------------------------------------------------------|---------|-----------|-----------|-----------|-----------|----|-------------------------------------------------------------------------------------------------------------------------------------------------------------------------------------------------------------------------------------------------------------------------------------------------|
| Biological Process | GO:0030900 | forebrain development                                                      | 48/2279 | 391/18866 | 0.4757047 | 0.6795154 | 0.6148497 | 48 | NRP2/CREB1/MFSD2A/NDE1/SKI/SETD2/SLC8A1/BTBD3/ZEB2/CSF1R/EIF2B5/EPHB3/RTN4/DISC1/TRAPPC9/NDST1/APP/RBPJ/HDAC1/ZMIZ1/FGFR1/RAPGEF2/AQP1/RARA/NF1/KIRREL3/TACC3/SLC1A2/WDR47/NUMB/NCOA1/PLCB1/ZNF335/ETS1/CDH1/TTC21B/NOTCH1/CORO1C/SLC2A1/TYRO3/SECISBP2/NDEL1/ALDH1A2/SLIT1/NPY/INHBA/OTX2/TSKU |
| Biological Process | GO:000212  | meiotic spindle organization                                               | 2/2279  | 13/18866  | 0.477478  | 0.6795154 | 0.6148497 | 2  | MYH9/PPP2R1A                                                                                                                                                                                                                                                                                    |
| Biological Process | GO:0001833 | inner cell mass cell proliferation                                         | 2/2279  | 13/18866  | 0.477478  | 0.6795154 | 0.6148497 | 2  | BRCA2/NDEL1                                                                                                                                                                                                                                                                                     |
| Biological Process | GO:0001967 | suckling behavior                                                          | 2/2279  | 13/18866  | 0.477478  | 0.6795154 | 0.6148497 | 2  | APP/DERL2                                                                                                                                                                                                                                                                                       |
| Biological Process | GO:0001973 | G protein-coupled adenosine receptor signaling pathway                     | 2/2279  | 13/18866  | 0.477478  | 0.6795154 | 0.6148497 | 2  | GNAI2/ACP3                                                                                                                                                                                                                                                                                      |
| Biological Process | GO:0002371 | dendritic cell cytokine production                                         | 2/2279  | 13/18866  | 0.477478  | 0.6795154 | 0.6148497 | 2  | SCIMP/NOD2                                                                                                                                                                                                                                                                                      |
| Biological Process | GO:0002674 | negative regulation of acute inflammatory response                         | 2/2279  | 13/18866  | 0.477478  | 0.6795154 | 0.6148497 | 2  | PPARG/NLRP3                                                                                                                                                                                                                                                                                     |
| Biological Process | GO:0003337 | mesenchymal to epithelial transition involved in metanephros morphogenesis | 2/2279  | 13/18866  | 0.477478  | 0.6795154 | 0.6148497 | 2  | PAX2/LIF                                                                                                                                                                                                                                                                                        |
| Biological Process | GO:0006068 | ethanol catabolic process                                                  | 2/2279  | 13/18866  | 0.477478  | 0.6795154 | 0.6148497 | 2  | ALDH2/SULT1A2                                                                                                                                                                                                                                                                                   |

|                    |            |                                                        |        |          |          |           |           |   |                |
|--------------------|------------|--------------------------------------------------------|--------|----------|----------|-----------|-----------|---|----------------|
| Biological Process | GO:0006553 | lysine metabolic process                               | 2/2279 | 13/18866 | 0.477478 | 0.6795154 | 0.6148497 | 2 | OGDH/CRYM      |
| Biological Process | GO:0008228 | opsonization                                           | 2/2279 | 13/18866 | 0.477478 | 0.6795154 | 0.6148497 | 2 | MYO18A/SPON2   |
| Biological Process | GO:0009223 | pyrimidine<br>deoxyribonucleotide<br>catabolic process | 2/2279 | 13/18866 | 0.477478 | 0.6795154 | 0.6148497 | 2 | UNG/NTHL1      |
| Biological Process | GO:0009313 | oligosaccharide catabolic<br>process                   | 2/2279 | 13/18866 | 0.477478 | 0.6795154 | 0.6148497 | 2 | HEXB/MAN2C1    |
| Biological Process | GO:0010457 | centriole-centriole cohesion                           | 2/2279 | 13/18866 | 0.477478 | 0.6795154 | 0.6148497 | 2 | DCTN1/CEP135   |
| Biological Process | GO:0015697 | quaternary ammonium<br>group transport                 | 2/2279 | 13/18866 | 0.477478 | 0.6795154 | 0.6148497 | 2 | SLC22A5/PDZK1  |
| Biological Process | GO:0015809 | arginine transport                                     | 2/2279 | 13/18866 | 0.477478 | 0.6795154 | 0.6148497 | 2 | SLC11A1/SLC7A1 |
| Biological Process | GO:0015816 | glycine transport                                      | 2/2279 | 13/18866 | 0.477478 | 0.6795154 | 0.6148497 | 2 | SLC36A3/SLC7A8 |
| Biological Process | GO:0016024 | CDP-diacylglycerol<br>biosynthetic process             | 2/2279 | 13/18866 | 0.477478 | 0.6795154 | 0.6148497 | 2 | CDS2/AGPAT5    |



|                    |            |                                                    |        |          |          |           |           |   |              |
|--------------------|------------|----------------------------------------------------|--------|----------|----------|-----------|-----------|---|--------------|
| Biological Process | GO:0016322 | neuron remodeling                                  | 2/2279 | 13/18866 | 0.477478 | 0.6795154 | 0.6148497 | 2 | BCL11A/APP   |
| Biological Process | GO:0018206 | peptidyl-methionine modification                   | 2/2279 | 13/18866 | 0.477478 | 0.6795154 | 0.6148497 | 2 | PDF/NAA16    |
| Biological Process | GO:0019336 | phenol-containing compound catabolic process       | 2/2279 | 13/18866 | 0.477478 | 0.6795154 | 0.6148497 | 2 | COMT/FAH     |
| Biological Process | GO:0021694 | cerebellar Purkinje cell layer formation           | 2/2279 | 13/18866 | 0.477478 | 0.6795154 | 0.6148497 | 2 | TTC21B/TLL1  |
| Biological Process | GO:0031126 | snoRNA 3'-end processing                           | 2/2279 | 13/18866 | 0.477478 | 0.6795154 | 0.6148497 | 2 | EXOSC2/FBL   |
| Biological Process | GO:0031453 | positive regulation of heterochromatin assembly    | 2/2279 | 13/18866 | 0.477478 | 0.6795154 | 0.6148497 | 2 | ATF7IP/DNMT1 |
| Biological Process | GO:0031953 | negative regulation of protein autophosphorylation | 2/2279 | 13/18866 | 0.477478 | 0.6795154 | 0.6148497 | 2 | PTPRC/ENG    |
| Biological Process | GO:0032352 | positive regulation of hormone metabolic process   | 2/2279 | 13/18866 | 0.477478 | 0.6795154 | 0.6148497 | 2 | RDH10/POR    |
| Biological Process | GO:0032536 | regulation of cell projection size                 | 2/2279 | 13/18866 | 0.477478 | 0.6795154 | 0.6148497 | 2 | CDHR2/EZR    |

|                    |            |                                                                                 |        |          |          |           |           |   |                |
|--------------------|------------|---------------------------------------------------------------------------------|--------|----------|----------|-----------|-----------|---|----------------|
| Biological Process | GO:0032968 | positive regulation of transcription elongation from RNA polymerase II promoter | 2/2279 | 13/18866 | 0.477478 | 0.6795154 | 0.6148497 | 2 | BRD4/CDK13     |
| Biological Process | GO:0033147 | negative regulation of intracellular estrogen receptor signaling pathway        | 2/2279 | 13/18866 | 0.477478 | 0.6795154 | 0.6148497 | 2 | LBH/ZNF366     |
| Biological Process | GO:0033235 | positive regulation of protein sumoylation                                      | 2/2279 | 13/18866 | 0.477478 | 0.6795154 | 0.6148497 | 2 | HDAC4/TOLLIP   |
| Biological Process | GO:0034144 | negative regulation of toll-like receptor 4 signaling pathway                   | 2/2279 | 13/18866 | 0.477478 | 0.6795154 | 0.6148497 | 2 | MIR140/TNFAIP3 |
| Biological Process | GO:0034379 | very-low-density lipoprotein particle assembly                                  | 2/2279 | 13/18866 | 0.477478 | 0.6795154 | 0.6148497 | 2 | P4HB/MFSD2A    |
| Biological Process | GO:0034982 | mitochondrial protein processing                                                | 2/2279 | 13/18866 | 0.477478 | 0.6795154 | 0.6148497 | 2 | SPG7/MIPEP     |
| Biological Process | GO:0035588 | G protein-coupled purinergic receptor signaling pathway                         | 2/2279 | 13/18866 | 0.477478 | 0.6795154 | 0.6148497 | 2 | GNAI2/ACP3     |
| Biological Process | GO:0038007 | netrin-activated signaling pathway                                              | 2/2279 | 13/18866 | 0.477478 | 0.6795154 | 0.6148497 | 2 | UNC5B/UNC5D    |
| Biological Process | GO:0042415 | norepinephrine metabolic process                                                | 2/2279 | 13/18866 | 0.477478 | 0.6795154 | 0.6148497 | 2 | EPAS1/PRKN     |

|                    |            |                                                                              |        |          |          |           |           |   |              |
|--------------------|------------|------------------------------------------------------------------------------|--------|----------|----------|-----------|-----------|---|--------------|
| Biological Process | GO:0043568 | positive regulation of insulin-like growth factor receptor signaling pathway | 2/2279 | 13/18866 | 0.477478 | 0.6795154 | 0.6148497 | 2 | CDH3/MYORG   |
| Biological Process | GO:0043970 | histone H3-K9 acetylation                                                    | 2/2279 | 13/18866 | 0.477478 | 0.6795154 | 0.6148497 | 2 | SPHK2/PIH1D1 |
| Biological Process | GO:0045579 | positive regulation of B cell differentiation                                | 2/2279 | 13/18866 | 0.477478 | 0.6795154 | 0.6148497 | 2 | INPP5D/PCID2 |
| Biological Process | GO:0045759 | negative regulation of action potential                                      | 2/2279 | 13/18866 | 0.477478 | 0.6795154 | 0.6148497 | 2 | BIN1/CNR2    |
| Biological Process | GO:0048266 | behavioral response to pain                                                  | 2/2279 | 13/18866 | 0.477478 | 0.6795154 | 0.6148497 | 2 | THBS1/NTRK1  |
| Biological Process | GO:0048302 | regulation of isotype switching to IgG isotypes                              | 2/2279 | 13/18866 | 0.477478 | 0.6795154 | 0.6148497 | 2 | PTPRC/PAXIP1 |
| Biological Process | GO:0048715 | negative regulation of oligodendrocyte differentiation                       | 2/2279 | 13/18866 | 0.477478 | 0.6795154 | 0.6148497 | 2 | NF1/NOTCH1   |
| Biological Process | GO:0048934 | peripheral nervous system neuron differentiation                             | 2/2279 | 13/18866 | 0.477478 | 0.6795154 | 0.6148497 | 2 | RUNX1/RUNX3  |
| Biological Process | GO:0048935 | peripheral nervous system neuron development                                 | 2/2279 | 13/18866 | 0.477478 | 0.6795154 | 0.6148497 | 2 | RUNX1/RUNX3  |

|                    |            |                                                                     |        |          |          |           |           |   |                 |
|--------------------|------------|---------------------------------------------------------------------|--------|----------|----------|-----------|-----------|---|-----------------|
| Biological Process | GO:0051386 | regulation of neurotrophin TRK receptor signaling pathway           | 2/2279 | 13/18866 | 0.477478 | 0.6795154 | 0.6148497 | 2 | CYFIP2/CYFIP1   |
| Biological Process | GO:0051481 | negative regulation of cytosolic calcium ion concentration          | 2/2279 | 13/18866 | 0.477478 | 0.6795154 | 0.6148497 | 2 | SMAD3/SLC8A1    |
| Biological Process | GO:0051956 | negative regulation of amino acid transport                         | 2/2279 | 13/18866 | 0.477478 | 0.6795154 | 0.6148497 | 2 | SLC43A2/SLC43A1 |
| Biological Process | GO:0055091 | phospholipid homeostasis                                            | 2/2279 | 13/18866 | 0.477478 | 0.6795154 | 0.6148497 | 2 | ABCG1/ABCA1     |
| Biological Process | GO:0060123 | regulation of growth hormone secretion                              | 2/2279 | 13/18866 | 0.477478 | 0.6795154 | 0.6148497 | 2 | ITSN1/GHRL      |
| Biological Process | GO:0060221 | retinal rod cell differentiation                                    | 2/2279 | 13/18866 | 0.477478 | 0.6795154 | 0.6148497 | 2 | RPGRIP1/NRL     |
| Biological Process | GO:0060340 | positive regulation of type I interferon-mediated signaling pathway | 2/2279 | 13/18866 | 0.477478 | 0.6795154 | 0.6148497 | 2 | NLR5/FADD       |
| Biological Process | GO:0061029 | eyelid development in camera-type eye                               | 2/2279 | 13/18866 | 0.477478 | 0.6795154 | 0.6148497 | 2 | HDAC1/INHBA     |
| Biological Process | GO:0061043 | regulation of vascular wound healing                                | 2/2279 | 13/18866 | 0.477478 | 0.6795154 | 0.6148497 | 2 | TNF/TNFAIP3     |

|                    |            |                                               |        |          |          |           |           |   |              |
|--------------------|------------|-----------------------------------------------|--------|----------|----------|-----------|-----------|---|--------------|
| Biological Process | GO:0061430 | bone trabecula morphogenesis                  | 2/2279 | 13/18866 | 0.477478 | 0.6795154 | 0.6148497 | 2 | SBNO2/SEMA4D |
| Biological Process | GO:0071027 | nuclear RNA surveillance                      | 2/2279 | 13/18866 | 0.477478 | 0.6795154 | 0.6148497 | 2 | EXOSC2/PCID2 |
| Biological Process | GO:0071028 | nuclear mRNA surveillance                     | 2/2279 | 13/18866 | 0.477478 | 0.6795154 | 0.6148497 | 2 | EXOSC2/PCID2 |
| Biological Process | GO:0071352 | cellular response to interleukin-2            | 2/2279 | 13/18866 | 0.477478 | 0.6795154 | 0.6148497 | 2 | STAT5A/JAK1  |
| Biological Process | GO:0071872 | cellular response to epinephrine stimulus     | 2/2279 | 13/18866 | 0.477478 | 0.6795154 | 0.6148497 | 2 | PDE4D/KCNQ1  |
| Biological Process | GO:0072578 | neurotransmitter-gated ion channel clustering | 2/2279 | 13/18866 | 0.477478 | 0.6795154 | 0.6148497 | 2 | SSH1/ZDHHC2  |
| Biological Process | GO:0090042 | tubulin deacetylation                         | 2/2279 | 13/18866 | 0.477478 | 0.6795154 | 0.6148497 | 2 | NEK3/PRKAA1  |
| Biological Process | GO:0097152 | mesenchymal cell apoptotic process            | 2/2279 | 13/18866 | 0.477478 | 0.6795154 | 0.6148497 | 2 | PAX2/ETV6    |
| Biological Process | GO:0099638 | endosome to plasma membrane protein transport | 2/2279 | 13/18866 | 0.477478 | 0.6795154 | 0.6148497 | 2 | ZDHHC2/AKAP5 |

|                    |            |                                                                            |         |           |           |           |           |    |                                                                                                                                        |               |
|--------------------|------------|----------------------------------------------------------------------------|---------|-----------|-----------|-----------|-----------|----|----------------------------------------------------------------------------------------------------------------------------------------|---------------|
| Biological Process | GO:0099640 | axo-dendritic protein transport                                            | 2/2279  | 13/18866  | 0.477478  | 0.6795154 | 0.6148497 | 2  |                                                                                                                                        | KIF5C/MAP1A   |
| Biological Process | GO:1900103 | positive regulation of endoplasmic reticulum unfolded protein response     | 2/2279  | 13/18866  | 0.477478  | 0.6795154 | 0.6148497 | 2  |                                                                                                                                        | ERN1/PIK3R1   |
| Biological Process | GO:1900272 | negative regulation of long-term synaptic potentiation                     | 2/2279  | 13/18866  | 0.477478  | 0.6795154 | 0.6148497 | 2  |                                                                                                                                        | APP/CX3CR1    |
| Biological Process | GO:1901096 | regulation of autophagosome maturation                                     | 2/2279  | 13/18866  | 0.477478  | 0.6795154 | 0.6148497 | 2  |                                                                                                                                        | UVRAG/CLEC16A |
| Biological Process | GO:1902285 | semaphorin-plexin signaling pathway involved in neuron projection guidance | 2/2279  | 13/18866  | 0.477478  | 0.6795154 | 0.6148497 | 2  |                                                                                                                                        | PLXNC1/NRP2   |
| Biological Process | GO:1903977 | positive regulation of glial cell migration                                | 2/2279  | 13/18866  | 0.477478  | 0.6795154 | 0.6148497 | 2  |                                                                                                                                        | CCR2/CX3CR1   |
| Biological Process | GO:1904424 | regulation of GTP binding                                                  | 2/2279  | 13/18866  | 0.477478  | 0.6795154 | 0.6148497 | 2  |                                                                                                                                        | ARHGEF7/CLN5  |
| Biological Process | GO:0002478 | antigen processing and presentation of exogenous peptide antigen           | 22/2279 | 177/18866 | 0.4775418 | 0.6795154 | 0.6148497 | 22 | HLA-DMB/DCTN1/CALR/AP2A1/LNPEP/NCF4/DNM2/DYNC1H1/CTSD/HLA-C/HLA-F/NCF2/ITGB5/AP1B1/DCTN2/SEC13/PSMF1/SEC24C/PSMB7/KIFAP3/SEC31A/PSMD13 |               |
| Biological Process | GO:0002495 | antigen processing and presentation of peptide antigen via MHC class II    | 13/2279 | 103/18866 | 0.477778  | 0.6795463 | 0.6148776 | 13 | HLA-DMB/DCTN1/AP2A1/DNM2/DYNC1H1/CTSD/AP1B1/DCTN2/SEC13/SEC24C/KIFAP3/SEC31A/MARCH8                                                    |               |

|                    |            |                                                |         |           |           |           |           |    |                                                                                                                                                             |
|--------------------|------------|------------------------------------------------|---------|-----------|-----------|-----------|-----------|----|-------------------------------------------------------------------------------------------------------------------------------------------------------------|
| Biological Process | GO:0098869 | cellular oxidant detoxification                | 13/2279 | 103/18866 | 0.477778  | 0.6795463 | 0.6148776 | 13 | MPO/LPO/TNF/HBB/MGST2/CAT/NFE2L2/NXN/GSTO1/TXNRD2/GSTO2/SIRT3/PRXL2B                                                                                        |
| Biological Process | GO:1901570 | fatty acid derivative biosynthetic process     | 13/2279 | 103/18866 | 0.477778  | 0.6795463 | 0.6148776 | 13 | ACSL1/FAR2/BDH1/GGT1/MGST2/ACACA/ACSF3/HMGCL/ACAT1/SCD/ACSS3/SLC25A1/PRXL2B                                                                                 |
| Biological Process | GO:0034764 | positive regulation of transmembrane transport | 26/2279 | 210/18866 | 0.4782535 | 0.6801206 | 0.6153973 | 26 | KCNE1/FXYD1/PIK3R1/CCR2/DNM2/TESC/NOS1AP/ACTN4/P2RY6/HTR3A/SLC1A2/HTT/KCNQ1/PRKCI/NFE2L2/GSTO1/F2R/ANO6/ANK2/PLCG1/PDZK1/CASQ1/CLTCL1/FGF14/STIMATE/CRACR2A |
| Biological Process | GO:0055081 | anion homeostasis                              | 8/2279  | 62/18866  | 0.4785008 | 0.6803706 | 0.6156235 | 8  | ABCG1/ABCC2/KCTD7/ABCA1/SLC12A1/CA12/SLC12A7/PRKAA1                                                                                                         |
| Biological Process | GO:0050709 | negative regulation of protein secretion       | 12/2279 | 95/18866  | 0.4810521 | 0.6834867 | 0.618443  | 12 | RAB11FIP1/FRMD4A/MIR199A1/RHBDF2/ENY2/GHRL/KLF7/MIR199A2/F2R/SREBF1/ADTRP/PRKN                                                                              |
| Biological Process | GO:0060337 | type I interferon signaling pathway            | 12/2279 | 95/18866  | 0.4810521 | 0.6834867 | 0.618443  | 12 | IRF8/IRF5/HLA-C/HLA-F/PTPN6/JAK1/NLRC5/SP100/MX1/IRF2/ISG20/FADD                                                                                            |
| Biological Process | GO:0070167 | regulation of biomineral tissue development    | 12/2279 | 95/18866  | 0.4810521 | 0.6834867 | 0.618443  | 12 | SMAD3/SLC8A1/TGFB1/BMPR1B/SGMS2/NOTCH1/MEF2C/LTF/CEBPB/ANO6/FAM20C/RFLNA                                                                                    |
| Biological Process | GO:0071357 | cellular response to type I interferon         | 12/2279 | 95/18866  | 0.4810521 | 0.6834867 | 0.618443  | 12 | IRF8/IRF5/HLA-C/HLA-F/PTPN6/JAK1/NLRC5/SP100/MX1/IRF2/ISG20/FADD                                                                                            |
| Biological Process | GO:0110149 | regulation of biomineralization                | 12/2279 | 95/18866  | 0.4810521 | 0.6834867 | 0.618443  | 12 | SMAD3/SLC8A1/TGFB1/BMPR1B/SGMS2/NOTCH1/MEF2C/LTF/CEBPB/ANO6/FAM20C/RFLNA                                                                                    |

|                    |            |                                                                 |         |           |           |           |           |    |                                                                                                                                                                                                                                                                         |
|--------------------|------------|-----------------------------------------------------------------|---------|-----------|-----------|-----------|-----------|----|-------------------------------------------------------------------------------------------------------------------------------------------------------------------------------------------------------------------------------------------------------------------------|
| Biological Process | GO:0046394 | carboxylic acid biosynthetic process                            | 45/2279 | 367/18866 | 0.4814024 | 0.6838822 | 0.6188009 | 45 | PRKAG2/MGLL/AP2A1/DSE/GADL1/DHRS9/LIPC/GGT1/AMACR/MTHFD1L/CBS/AKR1D1/MTHFS/OSBPL6/PRKAB1/ACOT7/ACSS1/TGFB1/RDH10/MYO5A/NR1H2/AGXT/ACACB/MGST2/PDGF/UPB1/ACSS2/ACOX2/MTHFD1/HOGA1/PER2/SLC1A3/PKM/ACACA/ACSF3/FA2H/ADI1/SCD/WBTC1/ALDH1A2/ASPG/HAS3/ACADVL/PRKAA1/PRXL2B |
| Biological Process | GO:1903409 | reactive oxygen species biosynthetic process                    | 16/2279 | 128/18866 | 0.4822718 | 0.6850148 | 0.6198257 | 16 | HDAC4/MPO/IL10/SMAD3/DNM2/MIR199A1/TNF/RAB27A/NOS1AP/MIR24-2/CLU/SPHK2/HBB/ITGB2/MIR199A2/CX3CR1                                                                                                                                                                        |
| Biological Process | GO:0006754 | ATP biosynthetic process                                        | 7/2279  | 54/18866  | 0.4824747 | 0.6850982 | 0.6199012 | 7  | PRKAG2/ENO1/VPS9D1/SPHK2/TGFB1/PKM/ATP5PD                                                                                                                                                                                                                               |
| Biological Process | GO:0010524 | positive regulation of calcium ion transport into cytosol       | 7/2279  | 54/18866  | 0.4824747 | 0.6850982 | 0.6199012 | 7  | P2RY6/HTT/GSTO1/F2R/PLCG1/P2RX5/CASQ1                                                                                                                                                                                                                                   |
| Biological Process | GO:0031570 | DNA integrity checkpoint                                        | 20/2279 | 161/18866 | 0.4829238 | 0.6856334 | 0.6203855 | 20 | TRIM39/BLM/FZR1/TFDP1/FOXN3/HUS1/E2F7/PCBP4/EME1/ZNF385A/ARID3A/TAOK3/CLSPN/TP53BP1/RHNO1/CHEK2/NAE1/MAP3K20/ABRAXAS1/BABAM2                                                                                                                                            |
| Biological Process | GO:0048002 | antigen processing and presentation of peptide antigen          | 24/2279 | 194/18866 | 0.4832793 | 0.6860357 | 0.6207494 | 24 | HLA-DMB/DCTN1/CALR/AP2A1/SLC11A1/LNPEP/NCF4/DNM2/DYNC1H1/CTSD/HLA-C/HLA-F/NCF2/ITGB5/AP1B1/DCTN2/SEC13/PSMF1/SEC24C/PSMB7/KIFAP3/SEC31A/PSMD13/MARCH8                                                                                                                   |
| Biological Process | GO:0051262 | protein tetramerization                                         | 11/2279 | 87/18866  | 0.4845776 | 0.6875704 | 0.6221381 | 11 | TRPM2/ACOT13/TRPM6/CRTC3/ACACB/UPB1/TRPM3/ACACA/MAT1A/ALDH1A2/TK1                                                                                                                                                                                                       |
| Biological Process | GO:0060218 | hematopoietic stem cell differentiation                         | 11/2279 | 87/18866  | 0.4845776 | 0.6875704 | 0.6221381 | 11 | MYB/RUNX1/TCF12/SETD1A/PSMF1/NFE2L2/PUS7/TCF3/PSMB7/ERCC2/PSMD13                                                                                                                                                                                                        |
| Biological Process | GO:0090049 | regulation of cell migration involved in sprouting angiogenesis | 11/2279 | 87/18866  | 0.4845776 | 0.6875704 | 0.6221381 | 11 | MAP3K3/HDAC7/ITGB1BP1/MIR199A1/MIR101-2/THBS1/AKT3/MIR27A/MIR23A/MIR199A2/NOTCH1                                                                                                                                                                                        |



|                    |            |                                                  |         |           |           |           |           |    |                                                                                                                                                                                                                                                                                                                                                          |
|--------------------|------------|--------------------------------------------------|---------|-----------|-----------|-----------|-----------|----|----------------------------------------------------------------------------------------------------------------------------------------------------------------------------------------------------------------------------------------------------------------------------------------------------------------------------------------------------------|
| Biological Process | GO:0006417 | regulation of translation                        | 55/2279 | 450/18866 | 0.4847681 | 0.6877381 | 0.6222899 | 55 | PIWIL4/RXRA/CALR/RPS6KA1/MIR145/KLHL25/TRNAU1AP/TNRC6B/PLD1/TNF/CCL5/NCK2/MIR101-2/EIF2B5/AGO1/LARP1/KRT17/ZC3H12D/THBS1/APP/SAMD4A/ZNF385A/MIR27A/CTIF/AGO2/MTG2/MIF4GD/RARA/CPEB3/IGF2BP3/MKNK1/INPP5E/FTO/PUS7/HNRNPLL/MIR138-2/CELF1/PER2/PKM/PER1/NOTCH4/PAIP1/ZNF598/BANK1/EIF3H/ILF3/SECISBP2/CYFIP1/BCL3/SYNERIP/EIF4G1/DAPK3/ZNF706/NIBAN1/SHFL |
| Biological Process | GO:0006304 | DNA modification                                 | 15/2279 | 120/18866 | 0.4854304 | 0.6883693 | 0.622861  | 15 | PIWIL4/MOV10L1/GATAD2A/EHMT2/UNG/NTHL1/KDM1B/ATF7IP/GRHL2/FTO/TET2/MTA2/DNMT1/MORC1/MUTYH                                                                                                                                                                                                                                                                |
| Biological Process | GO:0060147 | regulation of posttranscriptional gene silencing | 15/2279 | 120/18866 | 0.4854304 | 0.6883693 | 0.622861  | 15 | PPARG/NCOR2/RAE1/TNF/POLR2F/AGO1/RIPK1/LIMD1/AGO2/TGFB1/NUP93/SEC13/RMRP/EIF4G1/H3C1                                                                                                                                                                                                                                                                     |
| Biological Process | GO:0060966 | regulation of gene silencing by RNA              | 15/2279 | 120/18866 | 0.4854304 | 0.6883693 | 0.622861  | 15 | PPARG/NCOR2/RAE1/TNF/POLR2F/AGO1/RIPK1/LIMD1/AGO2/TGFB1/NUP93/SEC13/RMRP/EIF4G1/H3C1                                                                                                                                                                                                                                                                     |
| Biological Process | GO:0006220 | pyrimidine nucleotide metabolic process          | 6/2279  | 46/18866  | 0.4869643 | 0.6900294 | 0.6243631 | 6  | UNG/UCK2/NTHL1/AK5/DCTD/DHODH                                                                                                                                                                                                                                                                                                                            |
| Biological Process | GO:0031641 | regulation of myelination                        | 6/2279  | 46/18866  | 0.4869643 | 0.6900294 | 0.6243631 | 6  | LG14/TNFRSF1B/TG/TNFRSF21/RARA/RARG                                                                                                                                                                                                                                                                                                                      |
| Biological Process | GO:0032007 | negative regulation of TOR signaling             | 6/2279  | 46/18866  | 0.4869643 | 0.6900294 | 0.6243631 | 6  | SH3BP4/ARNTL/TSC2/TNFAIP8L1/NPRL2/PRKAA1                                                                                                                                                                                                                                                                                                                 |
| Biological Process | GO:0048538 | thymus development                               | 6/2279  | 46/18866  | 0.4869643 | 0.6900294 | 0.6243631 | 6  | MAD1L1/EPHB3/RIPK3/BCL2/LMO4/FADD                                                                                                                                                                                                                                                                                                                        |
| Biological Process | GO:0050982 | detection of mechanical stimulus                 | 6/2279  | 46/18866  | 0.4869643 | 0.6900294 | 0.6243631 | 6  | TTN/PKD1L1/JUP/SCN1A/NTRK1/TMC1                                                                                                                                                                                                                                                                                                                          |

|                    |            |                                                                                          |         |           |           |           |           |    |                                                                                                                                                                                                                                                                         |
|--------------------|------------|------------------------------------------------------------------------------------------|---------|-----------|-----------|-----------|-----------|----|-------------------------------------------------------------------------------------------------------------------------------------------------------------------------------------------------------------------------------------------------------------------------|
| Biological Process | GO:0043462 | regulation of ATPase activity                                                            | 10/2279 | 79/18866  | 0.488407  | 0.6919706 | 0.6261195 | 10 | PAM16/TNNT3/UHRF1/HSCB/PFN1/DNAJB6/MCM2/TMEM64/LTF/AHSA2P                                                                                                                                                                                                               |
| Biological Process | GO:0006275 | regulation of DNA replication                                                            | 14/2279 | 112/18866 | 0.48879   | 0.6924099 | 0.6265171 | 14 | BLM/BRCA2/HUS1/E2F7/WRNIP1/ZBTB38/EHMT2/FGFR1/SMARCAL1/PPP2R1A/CHEK2/BCAR3/KAT7/FBH1                                                                                                                                                                                    |
| Biological Process | GO:0016053 | organic acid biosynthetic process                                                        | 45/2279 | 368/18866 | 0.4891973 | 0.6928837 | 0.6269458 | 45 | PRKAG2/MGLL/AP2A1/DSE/GADL1/DHRS9/LIPC/GGT1/AMACR/MTHFD1L/CBS/AKR1D1/MTHFS/OSBPL6/PRKAB1/ACOT7/ACSS1/TGFB1/RDH10/MYO5A/NR1H2/AGXT/ACACB/MGST2/PDGFB/UPB1/ACSS2/ACO2/MTHFD1/HOGA1/PER2/SLC1A3/PKM/ACACA/ACSF3/FA2H/ADI1/SCD/WBTC1/ALDH1A2/ASPG/HAS3/ACADVL/PRKAA1/PRXL2B |
| Biological Process | GO:0048562 | embryonic organ morphogenesis                                                            | 37/2279 | 302/18866 | 0.4899608 | 0.6937581 | 0.627737  | 37 | ABR/SETD2/SMAD3/MTHFD1L/SUFU/HIPK2/MICAL2/CHST11/TGFBR2/SLC44A4/NDST1/DLL1/MIB1/LRIG1/WNT11/PAX2/FGFR1/TTC39C/RDH10/SP3/DSCAML1/RARG/GRHL2/RUNX2/IFT140/BCR/ENG/MTHFD1/HOXA9/NOTCH1/ALX3/MEF2C/HLX/TMED2/TEAD2/NODAL/HOXB7                                              |
| Biological Process | GO:0090068 | positive regulation of cell cycle process                                                | 37/2279 | 302/18866 | 0.4899608 | 0.6937581 | 0.627737  | 37 | RPTOR/BRD4/TGFA/TFDP1/NSMCE2/DYNC1H1/E2F7/CUL3/PCBP4/APP/ZNF385A/CDC16/ZBTB17/POC1A/FGFR1/CDC25A/ARID3A/TMOD3/SVIL/CSPP1/NUMA1/PDGFB/PLCB1/RB1/MEK2/PRKCE/CDC45/RHNO1/CHEK2/ANAPC7/PDGFRB/SPAG5/CDC14A/PLRG1/EIF4G1/PCID2/SLF1                                          |
| Biological Process | GO:0000462 | maturation of SSU-rRNA from tricistronic rRNA transcript (SSU-rRNA, 5.8S rRNA, LSU-rRNA) | 5/2279  | 38/18866  | 0.4921721 | 0.6958523 | 0.6296319 | 5  | RCL1/WDR46/NOP14/ERCC2/UTP4                                                                                                                                                                                                                                             |
| Biological Process | GO:0010591 | regulation of lamellipodium assembly                                                     | 5/2279  | 38/18866  | 0.4921721 | 0.6958523 | 0.6296319 | 5  | HDAC4/DNM2/FER/NCKAP1/AVIL                                                                                                                                                                                                                                              |
| Biological Process | GO:0010661 | positive regulation of muscle cell apoptotic process                                     | 5/2279  | 38/18866  | 0.4921721 | 0.6958523 | 0.6296319 | 5  | PPARG/MIR140/ARRB1/E2F3/MIR24-2                                                                                                                                                                                                                                         |
| Biological Process | GO:0014912 | negative regulation of smooth muscle cell migration                                      | 5/2279  | 38/18866  | 0.4921721 | 0.6958523 | 0.6296319 | 5  | MIR140/ILK/NFE2L2/MEF2C/TRIB1                                                                                                                                                                                                                                           |

|                    |            |                                                                         |         |           |           |           |           |    |                                                                                                                                                                                                                                                                                                                                           |
|--------------------|------------|-------------------------------------------------------------------------|---------|-----------|-----------|-----------|-----------|----|-------------------------------------------------------------------------------------------------------------------------------------------------------------------------------------------------------------------------------------------------------------------------------------------------------------------------------------------|
| Biological Process | GO:0032733 | positive regulation of interleukin-10 production                        | 5/2279  | 38/18866  | 0.4921721 | 0.6958523 | 0.6296319 | 5  | PRKCZ/MIR145/TLR9/TIGIT/NOD2                                                                                                                                                                                                                                                                                                              |
| Biological Process | GO:0045880 | positive regulation of smoothened signaling pathway                     | 5/2279  | 38/18866  | 0.4921721 | 0.6958523 | 0.6296319 | 5  | CHSY1/NDST1/POR/STK36/TXNDC15                                                                                                                                                                                                                                                                                                             |
| Biological Process | GO:0046466 | membrane lipid catabolic process                                        | 5/2279  | 38/18866  | 0.4921721 | 0.6958523 | 0.6296319 | 5  | HEXB/GALC/SMPDL3B/MGST2/PDXDC1                                                                                                                                                                                                                                                                                                            |
| Biological Process | GO:0051930 | regulation of sensory perception of pain                                | 5/2279  | 38/18866  | 0.4921721 | 0.6958523 | 0.6296319 | 5  | MGLL/IL10/COMT/F2R/ACP3                                                                                                                                                                                                                                                                                                                   |
| Biological Process | GO:1903432 | regulation of TORC1 signaling                                           | 5/2279  | 38/18866  | 0.4921721 | 0.6958523 | 0.6296319 | 5  | DGKQ/CLEC16A/SIK3/SEC13/PIH1D1                                                                                                                                                                                                                                                                                                            |
| Biological Process | GO:1903523 | negative regulation of blood circulation                                | 5/2279  | 38/18866  | 0.4921721 | 0.6958523 | 0.6296319 | 5  | PDE4D/BIN1/F2R/SPTBN4/GRK2                                                                                                                                                                                                                                                                                                                |
| Biological Process | GO:0007200 | phospholipase C-activating G protein-coupled receptor signaling pathway | 13/2279 | 104/18866 | 0.4923834 | 0.6960474 | 0.6298084 | 13 | C3AR1/FPR2/FPR1/C5AR2/P2RY6/HRH1/GNA11/CHRM2/F2R/GPR4/AGTR1/LTB4R/CX3CR1                                                                                                                                                                                                                                                                  |
| Biological Process | GO:0009201 | ribonucleoside triphosphate biosynthetic process                        | 9/2279  | 71/18866  | 0.4926111 | 0.6962657 | 0.630006  | 9  | PRKAG2/ENO1/VPS9D1/SPHK2/TGFB1/UCK2/PKM/IMPDH1/ATP5PD                                                                                                                                                                                                                                                                                     |
| Biological Process | GO:0042391 | regulation of membrane potential                                        | 54/2279 | 443/18866 | 0.4937219 | 0.6977319 | 0.6313326 | 54 | PRKCZ/SSH1/KCNE1/KCNAB2/CASQ2/WWP2/CACNA1C/YWHAH/FXYD1/ZMYND8/SLC8A1/GJA5/HSH2D/JUP/KCTD7/BIN1/BAIAP2/APP/NOS1AP/SMAD7/GRIK4/SCN1A/KCNK6/CNIH2/HTR3A/NRXN1/GNA11/GHRL/SH3GL1/SLC1A6/WDR1/CNR2/SNTA1/MAPK8IP2/KCNQ1/ARRB2/BCL2/S1PR2/GABBR1/P2RX1/MEF2C/SHANK2/CNTNAP1/NEDD4/CACNA1B/BCL2L1/ANK2/SLC29A1/P2RX5/GRID1/CUX2/FGF14/SPART/PRKN |

|                    |            |                                                                                 |         |           |           |           |           |    |                                                                                                                                                                                                                                     |
|--------------------|------------|---------------------------------------------------------------------------------|---------|-----------|-----------|-----------|-----------|----|-------------------------------------------------------------------------------------------------------------------------------------------------------------------------------------------------------------------------------------|
| Biological Process | GO:0050731 | positive regulation of peptidyl-tyrosine phosphorylation                        | 24/2279 | 195/18866 | 0.4939497 | 0.6979501 | 0.63153   | 24 | TGFA/ANGPT1/TNF/CCL5/CSF1R/TNFRSF1A/TGFB1/PTPRJ/SEMA4D/DGKQ/LRRK1/CSF3/ITGB3/GHRL/PTPRC/IL6R/PDGFB/CASS4/ARRB2/BANK1/ARHGEF2/CRLF1/PARP9/LIF                                                                                        |
| Biological Process | GO:0046034 | ATP metabolic process                                                           | 38/2279 | 311/18866 | 0.4962126 | 0.7010433 | 0.6343288 | 38 | FOXK1/HDAC4/PRKAG2/AMPD3/ENO1/NADK/SLC25A25/HK1/PFKFB4/RAE1/CBFA2T3/DHTKD1/APP/OGDH/NDUFS2/ATP6V1B2/ADPGK/VPS9D1/PGAM1/SPHK2/TGFB1/NDUFS8/NUP93/ENO3/HK2/SEC13/GUK1/ESRRB/PKM/DNM1L/AK2/AK5/NDUFB6/FAM20C/SDHD/PFKFB3/PRKAA1/ATP5PD |
| Biological Process | GO:0006081 | cellular aldehyde metabolic process                                             | 8/2279  | 63/18866  | 0.497289  | 0.702042  | 0.6352325 | 8  | ALDH4A1/GLYCK/RDH10/AGXT/PDXK/HOGA1/RELA/ALDH1A2                                                                                                                                                                                    |
| Biological Process | GO:0007062 | sister chromatid cohesion                                                       | 8/2279  | 63/18866  | 0.497289  | 0.702042  | 0.6352325 | 8  | TNKS/NSMCE2/STAG1/PPP2R1A/RB1/RAD21L1/CDCA5/SLF1                                                                                                                                                                                    |
| Biological Process | GO:0032613 | interleukin-10 production                                                       | 8/2279  | 63/18866  | 0.497289  | 0.702042  | 0.6352325 | 8  | PRKCZ/MIR145/TLR9/DLL1/TNFRSF21/TIGIT/NOD2/VSIR                                                                                                                                                                                     |
| Biological Process | GO:0046622 | positive regulation of organ growth                                             | 8/2279  | 63/18866  | 0.497289  | 0.702042  | 0.6352325 | 8  | MIR199A1/RBPJ/FGFR1/ACACB/MIR199A2/NOTCH1/MEF2C/HLX                                                                                                                                                                                 |
| Biological Process | GO:1902686 | mitochondrial outer membrane permeabilization involved in programmed cell death | 8/2279  | 63/18866  | 0.497289  | 0.702042  | 0.6352325 | 8  | TFDP1/YWHAH/BMF/SPG7/YWHAZ/BCL2/TP53BP2/YWHAQ                                                                                                                                                                                       |
| Biological Process | GO:0018279 | protein N-linked glycosylation via asparagine                                   | 4/2279  | 30/18866  | 0.4984514 | 0.7029519 | 0.6360558 | 4  | RPN1/MGAT5/ASGR2/ST6GAL1                                                                                                                                                                                                            |
| Biological Process | GO:0033688 | regulation of osteoblast proliferation                                          | 4/2279  | 30/18866  | 0.4984514 | 0.7029519 | 0.6360558 | 4  | SMAD3/MIR138-2/BCL2/LTF                                                                                                                                                                                                             |

|                    |            |                                                             |         |           |           |           |           |    |                                                                                                                                                                                                                 |
|--------------------|------------|-------------------------------------------------------------|---------|-----------|-----------|-----------|-----------|----|-----------------------------------------------------------------------------------------------------------------------------------------------------------------------------------------------------------------|
| Biological Process | GO:0042133 | neurotransmitter metabolic process                          | 4/2279  | 30/18866  | 0.4984514 | 0.7029519 | 0.6360558 | 4  | COLQ/COMT/SLC44A4/HNMT                                                                                                                                                                                          |
| Biological Process | GO:0046337 | phosphatidylethanolamine metabolic process                  | 4/2279  | 30/18866  | 0.4984514 | 0.7029519 | 0.6360558 | 4  | PLA2G15/CHKB/LPIN1/ETNK2                                                                                                                                                                                        |
| Biological Process | GO:0048265 | response to pain                                            | 4/2279  | 30/18866  | 0.4984514 | 0.7029519 | 0.6360558 | 4  | THBS1/COMT/NTRK1/CACNA1B                                                                                                                                                                                        |
| Biological Process | GO:0051642 | centrosome localization                                     | 4/2279  | 30/18866  | 0.4984514 | 0.7029519 | 0.6360558 | 4  | NDE1/BICD2/NDEL1/EZR                                                                                                                                                                                            |
| Biological Process | GO:0060142 | regulation of syncytium formation by plasma membrane fusion | 4/2279  | 30/18866  | 0.4984514 | 0.7029519 | 0.6360558 | 4  | EHD1/NFATC2/FLOT1/SCGB3A1                                                                                                                                                                                       |
| Biological Process | GO:0007613 | memory                                                      | 15/2279 | 121/18866 | 0.4989637 | 0.7034655 | 0.6365206 | 15 | PRKCZ/CREB1/PPP1R1B/SGK1/ATXN1/COMT/HRH1/CPEB3/PLCB1/MAP1A/CEBPB/NTAN1/NTF4/CX3CR1/CUX2                                                                                                                         |
| Biological Process | GO:1900542 | regulation of purine nucleotide metabolic process           | 15/2279 | 121/18866 | 0.4989637 | 0.7034655 | 0.6365206 | 15 | HDAC4/PRKAG2/RCVRN/ENO1/PFKFB4/RAE1/CBFA2T3/APP/PGAM1/SPHK2/NUP93/SEC13/ESRRB/PFKFB3/PRKAA1                                                                                                                     |
| Biological Process | GO:1901988 | negative regulation of cell cycle phase transition          | 33/2279 | 270/18866 | 0.4994366 | 0.7040278 | 0.6370293 | 33 | TRIM39/BLM/FZR1/TFDP1/MAD1L1/FOXN3/PRMT2/HUS1/FBXO7/E2F7/CTDSPL/PCBP4/RIPK1/NACC2/ZNF385A/ARID3A/OVOL1/C10orf99/PSMF1/GFI1B/TAOK3/ZFYVE19/MIR138-2/CLSPN/RB1/BCL2/PSMB7/CHEK2/NAE1/PSMD13/PCID2/ABRAXAS1/BABAM2 |
| Biological Process | GO:0070098 | chemokine-mediated signaling pathway                        | 11/2279 | 88/18866  | 0.5004506 | 0.7052478 | 0.6381332 | 11 | CCR2/CCL5/PADI2/ACKR2/CCR9/CCL20/CXCR1/SLIT3/CCL22/CX3CR1/ACKR1                                                                                                                                                 |

|                    |            |                                               |         |           |           |           |           |    |                                                                                                                                                   |
|--------------------|------------|-----------------------------------------------|---------|-----------|-----------|-----------|-----------|----|---------------------------------------------------------------------------------------------------------------------------------------------------|
| Biological Process | GO:0090559 | regulation of membrane permeability           | 11/2279 | 88/18866  | 0.5004506 | 0.7052478 | 0.6381332 | 11 | TFDP1/TJP2/YWHAH/BMF/SPG7/HK2/YWHAZ/BCL2/TP53BP2/BCL2L1/YWHAQ                                                                                     |
| Biological Process | GO:0051168 | nuclear export                                | 25/2279 | 204/18866 | 0.50161   | 0.7067768 | 0.6395168 | 25 | CALR/NXF1/FIP1L1/AKAP13/CPSF3/SETD2/RAE1/ATXN1/XPO7/TCF7L2/SMG7/XPO6/TGFB1/PABPN1/ENY2/SMURF1/NUP93/SEC13/SMG6/SP100/HHEX/RBM15B/NOL6/CPSF4/PCID2 |
| Biological Process | GO:0002931 | response to ischemia                          | 7/2279  | 55/18866  | 0.5025843 | 0.7078347 | 0.640474  | 7  | MAP2K6/CSF1R/ARID1B/HK2/PER2/BCL2/CX3CR1                                                                                                          |
| Biological Process | GO:0003229 | ventricular cardiac muscle tissue development | 7/2279  | 55/18866  | 0.5025843 | 0.7078347 | 0.640474  | 7  | RXRA/CCM2L/RBPJ/SMAD7/TGFB1/ENG/NOTCH1                                                                                                            |
| Biological Process | GO:0097345 | mitochondrial outer membrane permeabilization | 7/2279  | 55/18866  | 0.5025843 | 0.7078347 | 0.640474  | 7  | TFDP1/YWHAH/BMF/YWHAZ/BCL2/TP53BP2/YWHAQ                                                                                                          |
| Biological Process | GO:0051170 | import into nucleus                           | 21/2279 | 171/18866 | 0.5029841 | 0.7081879 | 0.6407935 | 21 | ANGPT1/SNRPD3/PIK3R1/SMAD3/TNPO1/MBTPS1/E2F3/SUFU/IPO13/FAM53B/JUP/TGFB1/BACH2/NF1/NUP93/ARNTL/CDH1/SNUPN/CABP1/TSC2/GEMIN4                       |
| Biological Process | GO:1905952 | regulation of lipid localization              | 21/2279 | 171/18866 | 0.5029841 | 0.7081879 | 0.6407935 | 21 | PNPLA2/EHD1/PPARG/MYB/MAP2K6/TNF/ABCG1/ATP8A1/PLTP/THBS1/MIR27A/OSBPL6/NR1H2/ITGB3/GHRL/ABCA1/ACACB/FTO/ABHD5/AGTR1/PRKN                          |
| Biological Process | GO:0071897 | DNA biosynthetic process                      | 24/2279 | 196/18866 | 0.5045859 | 0.7103379 | 0.642739  | 24 | PPARG/TFDP1/TNKS/POLE/HMBOX1/WRNIP1/TK2/PHB/PARP4/GRHL2/SMG6/PDGFB/ARRB2/NPPC/PDGFRB/ANKRD1/TEX12/PARM1/POLD3/PARP10/CCT6A/POLE4/TK1/POLI         |
| Biological Process | GO:0001508 | action potential                              | 17/2279 | 138/18866 | 0.5046774 | 0.7103615 | 0.6427603 | 17 | KCNE1/KCNAB2/CACNA1C/YWHAH/SLC8A1/GJA5/JUP/BIN1/NOS1AP/SCN1A/GNA11/CNR2/SNTA1/KCNQ1/P2RX1/CNTNAP1/ANK2                                            |

|                    |            |                                                                                  |         |          |           |           |           |    |                                                                  |
|--------------------|------------|----------------------------------------------------------------------------------|---------|----------|-----------|-----------|-----------|----|------------------------------------------------------------------|
| Biological Process | GO:0014032 | neural crest cell development                                                    | 10/2279 | 80/18866 | 0.5050493 | 0.7104639 | 0.642853  | 10 | SEMA6B/NRP2/ANXA6/ZEB2/SEMA4A/SEMA4B/SEMA4D/RDH10/CORO1C/ALDH1A2 |
| Biological Process | GO:0042590 | antigen processing and presentation of exogenous peptide antigen via MHC class I | 10/2279 | 80/18866 | 0.5050493 | 0.7104639 | 0.642853  | 10 | CALR/LNPEP/NCF4/HLA-C/HLA-F/NCF2/ITGB5/PSMF1/PSMB7/PSMD13        |
| Biological Process | GO:0048678 | response to axon injury                                                          | 10/2279 | 80/18866 | 0.5050493 | 0.7104639 | 0.642853  | 10 | KREMEN1/STK24/GIPR/JAM3/GRN/NTRK1/BCL2/CERS2/NDEL1/INPP5F        |
| Biological Process | GO:1900182 | positive regulation of protein localization to nucleus                           | 10/2279 | 80/18866 | 0.5050493 | 0.7104639 | 0.642853  | 10 | TRIM8/PIK3R1/SMAD3/JUP/TGFB1/CDH1/KAT7/CCT6A/PARP9/LIF           |
| Biological Process | GO:0002313 | mature B cell differentiation involved in immune response                        | 3/2279  | 22/18866 | 0.5064975 | 0.7105024 | 0.6428878 | 3  | DLL1/DOCK10/BCL3                                                 |
| Biological Process | GO:0006071 | glycerol metabolic process                                                       | 3/2279  | 22/18866 | 0.5064975 | 0.7105024 | 0.6428878 | 3  | PGP/PCK2/DYSF                                                    |
| Biological Process | GO:0006085 | acetyl-CoA biosynthetic process                                                  | 3/2279  | 22/18866 | 0.5064975 | 0.7105024 | 0.6428878 | 3  | ACSS1/ACSS2/ACAT1                                                |
| Biological Process | GO:0009127 | purine nucleoside monophosphate biosynthetic process                             | 3/2279  | 22/18866 | 0.5064975 | 0.7105024 | 0.6428878 | 3  | AMPD3/LHPP/IMPDH1                                                |
| Biological Process | GO:0009220 | pyrimidine ribonucleotide biosynthetic process                                   | 3/2279  | 22/18866 | 0.5064975 | 0.7105024 | 0.6428878 | 3  | UCK2/AKS/DHODH                                                   |

|                    |            |                                                           |        |          |           |           |           |   |                      |
|--------------------|------------|-----------------------------------------------------------|--------|----------|-----------|-----------|-----------|---|----------------------|
| Biological Process | GO:0021516 | dorsal spinal cord development                            | 3/2279 | 22/18866 | 0.5064975 | 0.7105024 | 0.6428878 | 3 | DRGX/PAX7/LMO4       |
| Biological Process | GO:0045061 | thymic T cell selection                                   | 3/2279 | 22/18866 | 0.5064975 | 0.7105024 | 0.6428878 | 3 | ITPKB/PTPRC/DOCK2    |
| Biological Process | GO:0045663 | positive regulation of myoblast differentiation           | 3/2279 | 22/18866 | 0.5064975 | 0.7105024 | 0.6428878 | 3 | ILK/PLCB1/MEF2C      |
| Biological Process | GO:0045980 | negative regulation of nucleotide metabolic process       | 3/2279 | 22/18866 | 0.5064975 | 0.7105024 | 0.6428878 | 3 | HDAC4/CDA/CBFA2T3    |
| Biological Process | GO:0051152 | positive regulation of smooth muscle cell differentiation | 3/2279 | 22/18866 | 0.5064975 | 0.7105024 | 0.6428878 | 3 | MIR140/MIR145/ENG    |
| Biological Process | GO:0060487 | lung epithelial cell differentiation                      | 3/2279 | 22/18866 | 0.5064975 | 0.7105024 | 0.6428878 | 3 | CREB1/RBPJ/GRHL2     |
| Biological Process | GO:0060972 | left/right pattern formation                              | 3/2279 | 22/18866 | 0.5064975 | 0.7105024 | 0.6428878 | 3 | PKD1L1/DLL1/NOTCH1   |
| Biological Process | GO:0071359 | cellular response to dsRNA                                | 3/2279 | 22/18866 | 0.5064975 | 0.7105024 | 0.6428878 | 3 | COLEC12/FLOT1/STING1 |
| Biological Process | GO:0071459 | protein localization to chromosome, centromeric region    | 3/2279 | 22/18866 | 0.5064975 | 0.7105024 | 0.6428878 | 3 | CHAMP1/MIS12/RB1     |



|                    |            |                                                                         |         |           |           |           |           |    |                                                                                             |
|--------------------|------------|-------------------------------------------------------------------------|---------|-----------|-----------|-----------|-----------|----|---------------------------------------------------------------------------------------------|
| Biological Process | GO:0071467 | cellular response to pH                                                 | 3/2279  | 22/18866  | 0.5064975 | 0.7105024 | 0.6428878 | 3  | GPLD1/GNA11/INSRR                                                                           |
| Biological Process | GO:0090189 | regulation of branching involved in ureteric bud morphogenesis          | 3/2279  | 22/18866  | 0.5064975 | 0.7105024 | 0.6428878 | 3  | TACSTD2/PAX2/HOXB7                                                                          |
| Biological Process | GO:0140112 | extracellular vesicle biogenesis                                        | 3/2279  | 22/18866  | 0.5064975 | 0.7105024 | 0.6428878 | 3  | RAB27A/COP5/PRKN                                                                            |
| Biological Process | GO:1903019 | negative regulation of glycoprotein metabolic process                   | 3/2279  | 22/18866  | 0.5064975 | 0.7105024 | 0.6428878 | 3  | MIR101-2/AGO2/ITM2C                                                                         |
| Biological Process | GO:1904753 | negative regulation of vascular associated smooth muscle cell migration | 3/2279  | 22/18866  | 0.5064975 | 0.7105024 | 0.6428878 | 3  | MIR140/NFE2L2/MEF2C                                                                         |
| Biological Process | GO:1902414 | protein localization to cell junction                                   | 13/2279 | 105/18866 | 0.5068997 | 0.7108567 | 0.6432083 | 13 | PRKCZ/BAIAP2/ZDHHC2/ACTN4/CNIH2/NRXN1/JAM3/ACTG1/KIF5C/NRXN2/MPP7/MAP1A/NECTIN1             |
| Biological Process | GO:2001022 | positive regulation of response to DNA damage stimulus                  | 13/2279 | 105/18866 | 0.5068997 | 0.7108567 | 0.6432083 | 13 | FAM168A/SPRED2/SPIDR/NACC2/ZNF385A/FOXM1/ANKRD1/PARP9/PAXIP1/ABRAXAS1/SLF1/FBH1/BABAM2      |
| Biological Process | GO:0071426 | ribonucleoprotein complex export from nucleus                           | 16/2279 | 130/18866 | 0.5084253 | 0.7122486 | 0.6444678 | 16 | NXF1/FIP1L1/CPSF3/SETD2/RAE1/SMG7/PABPN1/ENY2/NUP93/SEC13/SMG6/HHEX/RBM15B/NOL6/CPSF4/PCID2 |
| Biological Process | GO:0006383 | transcription by RNA polymerase III                                     | 6/2279  | 47/18866  | 0.5087169 | 0.7122486 | 0.6444678 | 6  | RPTOR/CRCP/ZC3H8/BRF1/CHD8/ZNF76                                                            |

|                    |            |                                                                |        |          |           |           |           |   |                                       |
|--------------------|------------|----------------------------------------------------------------|--------|----------|-----------|-----------|-----------|---|---------------------------------------|
| Biological Process | GO:0007080 | mitotic metaphase plate congression                            | 6/2279 | 47/18866 | 0.5087169 | 0.7122486 | 0.6444678 | 6 | MAD1L1/CHAMP1/CUL3/MIS12/DCTN2/CDCA5  |
| Biological Process | GO:0007140 | male meiotic nuclear division                                  | 6/2279 | 47/18866 | 0.5087169 | 0.7122486 | 0.6444678 | 6 | MOV10L1/BRCA2/MEIOB/FANCA/CCNA1/DMC1  |
| Biological Process | GO:0022602 | ovulation cycle process                                        | 6/2279 | 47/18866 | 0.5087169 | 0.7122486 | 0.6444678 | 6 | MAP2K6/ARRB1/BMPR1B/ARRB2/SLIT3/INHBA |
| Biological Process | GO:0043268 | positive regulation of potassium ion transport                 | 6/2279 | 47/18866 | 0.5087169 | 0.7122486 | 0.6444678 | 6 | KCNE1/DNM2/NOS1AP/KCNQ1/ANO6/ANK2     |
| Biological Process | GO:0048483 | autonomic nervous system development                           | 6/2279 | 47/18866 | 0.5087169 | 0.7122486 | 0.6444678 | 6 | NRP2/PHOX2A/NF1/NTRK1/HLX/HES3        |
| Biological Process | GO:0048599 | oocyte development                                             | 6/2279 | 47/18866 | 0.5087169 | 0.7122486 | 0.6444678 | 6 | BRCA2/KMT2D/PPP2R1A/BCL2/DMC1/NPPC    |
| Biological Process | GO:0070849 | response to epidermal growth factor                            | 6/2279 | 47/18866 | 0.5087169 | 0.7122486 | 0.6444678 | 6 | DUSP22/BAIAP2/PAX2/DUSP3/PLCG1/MARS1  |
| Biological Process | GO:1904738 | vascular associated smooth muscle cell migration               | 6/2279 | 47/18866 | 0.5087169 | 0.7122486 | 0.6444678 | 6 | SSH1/MIR140/MIR143/PDGFB/NFE2L2/MEF2C |
| Biological Process | GO:1904752 | regulation of vascular associated smooth muscle cell migration | 6/2279 | 47/18866 | 0.5087169 | 0.7122486 | 0.6444678 | 6 | SSH1/MIR140/MIR143/PDGFB/NFE2L2/MEF2C |

|                    |            |                                                                           |         |           |           |           |           |    |                                                                                                                                                                                                                                                                               |
|--------------------|------------|---------------------------------------------------------------------------|---------|-----------|-----------|-----------|-----------|----|-------------------------------------------------------------------------------------------------------------------------------------------------------------------------------------------------------------------------------------------------------------------------------|
| Biological Process | GO:0045089 | positive regulation of innate immune response                             | 26/2279 | 213/18866 | 0.5089501 | 0.7124702 | 0.6446683 | 26 | NLRC4/AIM2/CLEC4C/CCL5/FPR2/MNDA/CD226/HLA-F/MUC12/FCN1/TRIM5/MUC20/BCL10/PSMF1/NLRC5/CREBBP/IL18RAP/PSMB7/CADM1/RELA/FBXW11/HEXIM1/PARP9/FADD/PSMD13/STING1                                                                                                                  |
| Biological Process | GO:1990868 | response to chemokine                                                     | 12/2279 | 97/18866  | 0.5113462 | 0.7149285 | 0.6468927 | 12 | CCR2/CCL5/PADI2/ACKR2/DOCK8/CCR9/CCL20/CXCR1/SLIT3/CCL22/CX3CR1/ACKR1                                                                                                                                                                                                         |
| Biological Process | GO:1990869 | cellular response to chemokine                                            | 12/2279 | 97/18866  | 0.5113462 | 0.7149285 | 0.6468927 | 12 | CCR2/CCL5/PADI2/ACKR2/DOCK8/CCR9/CCL20/CXCR1/SLIT3/CCL22/CX3CR1/ACKR1                                                                                                                                                                                                         |
| Biological Process | GO:0006457 | protein folding                                                           | 28/2279 | 230/18866 | 0.5129966 | 0.7149285 | 0.6468927 | 28 | TBCD/P4HB/CALR/FKBP5/AMFR/DNAJB13/GNAZ/AIP/GNAI2/PDIA5/HSPA4L/CLU/CLGN/GNAT2/DNAJB6/GNB3/GRN/UNC45A/GNG2/GNAO1/TOR1B/NPPC/BAG5/CCT6A/PFDN2/PFDN6/AHSA2P/P3H1                                                                                                                  |
| Biological Process | GO:0007189 | adenylate cyclase-activating G protein-coupled receptor signaling pathway | 18/2279 | 147/18866 | 0.5134033 | 0.7149285 | 0.6468927 | 18 | PDE4D/ADCY2/AKAP13/ADCY9/PRKCA/GNAI2/MRAP/RAPGEF2/ABCA1/CNR2/ADCY4/S1PR2/GNG2/LPAR2/S1PR4/GPR4/ADGRG3/ADGRE3                                                                                                                                                                  |
| Biological Process | GO:0015698 | inorganic anion transport                                                 | 21/2279 | 172/18866 | 0.5143193 | 0.7149285 | 0.6468927 | 21 | CLCN6/SLC11A1/FXYD1/ANO7/TG/LRRC8C/P2RY6/FGFR1/SLC13A4/SLC26A1/SLC22A11/SLC37A1/SLC1A3/LRRC8B/ANO10/CEBPB/ANO6/SLC12A1/ANO8/SLC12A7/PACC1                                                                                                                                     |
| Biological Process | GO:0050806 | positive regulation of synaptic transmission                              | 21/2279 | 172/18866 | 0.5143193 | 0.7149285 | 0.6468927 | 21 | PRKCZ/SSH1/CREB1/CCR2/TNF/BAIAP2/ZDHHC2/APP/AKAP5/NF1/NRXN1/ARRB2/NTRK1/SLC1A3/DNM1L/SHANK2/PRKCE/FLOT1/DTNBP1/CX3CR1/CUX2                                                                                                                                                    |
| Biological Process | GO:0043687 | post-translational protein modification                                   | 44/2279 | 363/18866 | 0.5148159 | 0.7149285 | 0.6468927 | 44 | LTBP1/PNPLA2/P4HB/SERPINA1/APLP2/RAB2A/KLHL25/MBTPS1/GPLD1/MGAT4A/FBXO7/WIP1/ZBTB16/KCTD7/CUL3/CCDC8/APP/FBXW2/MIA3/SDC2/SPARCL1/FBXO40/LMO7/COP55/FBXL19/ASB1/DCAF5/PSMF1/FBXL13/FBXL18/COPS3/KLHL21/FN3K/PSMB7/EPAS1/FAM20C/FBXW11/WDTC1/ANO8/NAE1/DCAF17/UCHL3/PSMD13/P3H1 |
| Biological Process | GO:0006694 | steroid biosynthetic process                                              | 24/2279 | 197/18866 | 0.5151807 | 0.7149285 | 0.6468927 | 24 | PRKAG2/GFI1/IDI1/VDR/AMACR/MBTPS1/TNF/ABCG1/AKR1D1/HSD17B2/OSBPL6/FDX1/DGKQ/SF1/POR/ACACB/ACBD3/ACOX2/ACACA/HMGCS1/SCD/SREBF1/HSD11B2/PRKAA1                                                                                                                                  |

|                    |            |                                                                 |        |          |           |           |           |   |                                                  |
|--------------------|------------|-----------------------------------------------------------------|--------|----------|-----------|-----------|-----------|---|--------------------------------------------------|
| Biological Process | GO:0002066 | columnar/cuboidal epithelial cell development                   | 8/2279 | 64/18866 | 0.5158728 | 0.7149285 | 0.6468927 | 8 | RHEB/RFX3/DLL1/FGFR1/RARA/RARG/ARNTL/TMC1        |
| Biological Process | GO:0002437 | inflammatory response to antigenic stimulus                     | 8/2279 | 64/18866 | 0.5158728 | 0.7149285 | 0.6468927 | 8 | ELANE/FUT7/IL10/TNF/RBPJ/IL1RN/NOTCH1/CD68       |
| Biological Process | GO:0009584 | detection of visible light                                      | 8/2279 | 64/18866 | 0.5158728 | 0.7149285 | 0.6468927 | 8 | PDE6A/CACNA2D4/CRB1/CCDC66/GNAT2/GNA11/GRK7/EYS  |
| Biological Process | GO:1900449 | regulation of glutamate receptor signaling pathway              | 8/2279 | 64/18866 | 0.5158728 | 0.7149285 | 0.6468927 | 8 | CCR2/APP/CRHBP/CNIH2/MAPK8IP2/GSG1L/MEF2C/SHANK2 |
| Biological Process | GO:0001825 | blastocyst formation                                            | 5/2279 | 39/18866 | 0.516046  | 0.7149285 | 0.6468927 | 5 | RTN4/CUL3/SP3/KDM4C/NODAL                        |
| Biological Process | GO:0007190 | activation of adenylate cyclase activity                        | 5/2279 | 39/18866 | 0.516046  | 0.7149285 | 0.6468927 | 5 | ADCY2/ADCY9/GIPR/ADCY4/VIPR2                     |
| Biological Process | GO:0032660 | regulation of interleukin-17 production                         | 5/2279 | 39/18866 | 0.516046  | 0.7149285 | 0.6468927 | 5 | LY9/TGFB1/SLC7A5/NOD2/VSIR                       |
| Biological Process | GO:0033146 | regulation of intracellular estrogen receptor signaling pathway | 5/2279 | 39/18866 | 0.516046  | 0.7149285 | 0.6468927 | 5 | RUNX1/LBH/ZNF366/AXIN1/KMT2D                     |
| Biological Process | GO:0033683 | nucleotide-excision repair, DNA incision                        | 5/2279 | 39/18866 | 0.516046  | 0.7149285 | 0.6468927 | 5 | NTHL1/ERCC1/POLD3/XPA/ERCC2                      |

|                    |            |                                                 |         |           |           |           |           |    |                                                                                                                                                                                                                   |
|--------------------|------------|-------------------------------------------------|---------|-----------|-----------|-----------|-----------|----|-------------------------------------------------------------------------------------------------------------------------------------------------------------------------------------------------------------------|
| Biological Process | GO:0045022 | early endosome to late endosome transport       | 5/2279  | 39/18866  | 0.516046  | 0.7149285 | 0.6468927 | 5  | LMTK2/SNX3/HOOK2/WDR81/EZR                                                                                                                                                                                        |
| Biological Process | GO:0046326 | positive regulation of glucose import           | 5/2279  | 39/18866  | 0.516046  | 0.7149285 | 0.6468927 | 5  | PIK3R1/SLC1A2/PRKCI/NFE2L2/CLTCL1                                                                                                                                                                                 |
| Biological Process | GO:0051931 | regulation of sensory perception                | 5/2279  | 39/18866  | 0.516046  | 0.7149285 | 0.6468927 | 5  | MGLL/IL10/COMT/F2R/ACP3                                                                                                                                                                                           |
| Biological Process | GO:0060416 | response to growth hormone                      | 5/2279  | 39/18866  | 0.516046  | 0.7149285 | 0.6468927 | 5  | PIK3R1/STAT5A/PXN/GHRL/MBD5                                                                                                                                                                                       |
| Biological Process | GO:0071709 | membrane assembly                               | 5/2279  | 39/18866  | 0.516046  | 0.7149285 | 0.6468927 | 5  | PACSIN2/NRXN1/NRXN2/MIR138-2/FLOT1                                                                                                                                                                                |
| Biological Process | GO:1901068 | guanosine-containing compound metabolic process | 5/2279  | 39/18866  | 0.516046  | 0.7149285 | 0.6468927 | 5  | AMPD3/TJP2/GUK1/GMPR2/IMPDH1                                                                                                                                                                                      |
| Biological Process | GO:0014033 | neural crest cell differentiation               | 11/2279 | 89/18866  | 0.5161956 | 0.7149285 | 0.6468927 | 11 | SEMA6B/NRP2/ANXA6/ZEB2/SEMA4A/SEMA4B/SEMA4D/RDH10/CORO1C/MEF2C/ALDH1A2                                                                                                                                            |
| Biological Process | GO:0061053 | somite development                              | 11/2279 | 89/18866  | 0.5161956 | 0.7149285 | 0.6468927 | 11 | SMAD3/ZEB2/LOXL3/DLL1/RBPJ/MIB1/WNT11/MTHFD1/NOTCH1/TMED2/ALDH1A2                                                                                                                                                 |
| Biological Process | GO:0010466 | negative regulation of peptidase activity       | 33/2279 | 272/18866 | 0.5175198 | 0.7149285 | 0.6468927 | 33 | SLPI/CSTA/TIMP2/SORL1/SERPINA1/SPOCK2/RPS6KA1/APLP2/SERPINB1/ARRB1/SPINT2/MIR199A1/TNF/MICAL1/SERPINB2/BIN1/THBS1/APP/UBE2O/MIR24-2/PAX2/AQP1/POR/DNAJB6/PSMF1/CRIM1/NOL3/ARRB2/MIR199A2/PIH1D1/LTF/COL28A1/PCID2 |

|                    |            |                                                      |         |           |           |           |           |    |                                                                                                                    |
|--------------------|------------|------------------------------------------------------|---------|-----------|-----------|-----------|-----------|----|--------------------------------------------------------------------------------------------------------------------|
| Biological Process | GO:0007259 | receptor signaling pathway via JAK-STAT              | 20/2279 | 164/18866 | 0.5178804 | 0.7149285 | 0.6468927 | 20 | IL10/CCR2/PIGU/TNF/CCL5/CSF1R/STAT5A/TNFRSF1A/FER/PTPRC/IL6R/PPP2R1A/NOTCH1/GGNBP2/F2R/BCL3/INPP5F/CRLF1/PARP9/LIF |
| Biological Process | GO:0002475 | antigen processing and presentation via MHC class Ib | 2/2279  | 14/18866  | 0.517964  | 0.7149285 | 0.6468927 | 2  | HLA-F/AP3D1                                                                                                        |
| Biological Process | GO:0002829 | negative regulation of type 2 immune response        | 2/2279  | 14/18866  | 0.517964  | 0.7149285 | 0.6468927 | 2  | CCR2/HLX                                                                                                           |
| Biological Process | GO:0003306 | Wnt signaling pathway involved in heart development  | 2/2279  | 14/18866  | 0.517964  | 0.7149285 | 0.6468927 | 2  | RBPJ/WNT11                                                                                                         |
| Biological Process | GO:0006244 | pyrimidine nucleotide catabolic process              | 2/2279  | 14/18866  | 0.517964  | 0.7149285 | 0.6468927 | 2  | UNG/NTHL1                                                                                                          |
| Biological Process | GO:0006999 | nuclear pore organization                            | 2/2279  | 14/18866  | 0.517964  | 0.7149285 | 0.6468927 | 2  | RTN4/NUP93                                                                                                         |
| Biological Process | GO:0007100 | mitotic centrosome separation                        | 2/2279  | 14/18866  | 0.517964  | 0.7149285 | 0.6468927 | 2  | NDE1/NDEL1                                                                                                         |
| Biological Process | GO:0007135 | meiosis II                                           | 2/2279  | 14/18866  | 0.517964  | 0.7149285 | 0.6468927 | 2  | PPP2R1A/RAD21L1                                                                                                    |
| Biological Process | GO:0009111 | vitamin catabolic process                            | 2/2279  | 14/18866  | 0.517964  | 0.7149285 | 0.6468927 | 2  | MTHFS/CYP4F3                                                                                                       |

|                    |            |                                                                  |        |          |          |           |           |   |              |
|--------------------|------------|------------------------------------------------------------------|--------|----------|----------|-----------|-----------|---|--------------|
| Biological Process | GO:0009214 | cyclic nucleotide catabolic process                              | 2/2279 | 14/18866 | 0.517964 | 0.7149285 | 0.6468927 | 2 | PDE4D/PDE9A  |
| Biological Process | GO:0010752 | regulation of cGMP-mediated signaling                            | 2/2279 | 14/18866 | 0.517964 | 0.7149285 | 0.6468927 | 2 | THBS1/NPPC   |
| Biological Process | GO:0010935 | regulation of macrophage cytokine production                     | 2/2279 | 14/18866 | 0.517964 | 0.7149285 | 0.6468927 | 2 | SPON2/TGFB1  |
| Biological Process | GO:0014819 | regulation of skeletal muscle contraction                        | 2/2279 | 14/18866 | 0.517964 | 0.7149285 | 0.6468927 | 2 | GSTO1/CASQ1  |
| Biological Process | GO:0014874 | response to stimulus involved in regulation of muscle adaptation | 2/2279 | 14/18866 | 0.517964 | 0.7149285 | 0.6468927 | 2 | HDAC4/CASQ1  |
| Biological Process | GO:0018410 | C-terminal protein amino acid modification                       | 2/2279 | 14/18866 | 0.517964 | 0.7149285 | 0.6468927 | 2 | GPLD1/WIPI2  |
| Biological Process | GO:0021527 | spinal cord association neuron differentiation                   | 2/2279 | 14/18866 | 0.517964 | 0.7149285 | 0.6468927 | 2 | PAX7/LMO4    |
| Biological Process | GO:0030207 | chondroitin sulfate catabolic process                            | 2/2279 | 14/18866 | 0.517964 | 0.7149285 | 0.6468927 | 2 | HEXB/ARSB    |
| Biological Process | GO:0034356 | NAD biosynthesis via nicotinamide riboside salvage pathway       | 2/2279 | 14/18866 | 0.517964 | 0.7149285 | 0.6468927 | 2 | PARP10/PARP9 |

|                    |            |                                                                |        |          |          |           |           |   |                |
|--------------------|------------|----------------------------------------------------------------|--------|----------|----------|-----------|-----------|---|----------------|
| Biological Process | GO:0035627 | ceramide transport                                             | 2/2279 | 14/18866 | 0.517964 | 0.7149285 | 0.6468927 | 2 | PLTP/SGPP1     |
| Biological Process | GO:0035751 | regulation of lysosomal lumen pH                               | 2/2279 | 14/18866 | 0.517964 | 0.7149285 | 0.6468927 | 2 | GRN/CLN5       |
| Biological Process | GO:0035791 | platelet-derived growth factor receptor-beta signaling pathway | 2/2279 | 14/18866 | 0.517964 | 0.7149285 | 0.6468927 | 2 | PDGFB/PDGFRB   |
| Biological Process | GO:0036092 | phosphatidylinositol-3-phosphate biosynthetic process          | 2/2279 | 14/18866 | 0.517964 | 0.7149285 | 0.6468927 | 2 | PIK3CD/INPP4A  |
| Biological Process | GO:0036295 | cellular response to increased oxygen levels                   | 2/2279 | 14/18866 | 0.517964 | 0.7149285 | 0.6468927 | 2 | PPARG/FOXO1    |
| Biological Process | GO:0042762 | regulation of sulfur metabolic process                         | 2/2279 | 14/18866 | 0.517964 | 0.7149285 | 0.6468927 | 2 | COMT/NFE2L2    |
| Biological Process | GO:0043173 | nucleotide salvage                                             | 2/2279 | 14/18866 | 0.517964 | 0.7149285 | 0.6468927 | 2 | AMPD3/UCK2     |
| Biological Process | GO:0043650 | dicarboxylic acid biosynthetic process                         | 2/2279 | 14/18866 | 0.517964 | 0.7149285 | 0.6468927 | 2 | MTHFD1L/MTHFD1 |
| Biological Process | GO:0043922 | negative regulation by host of viral transcription             | 2/2279 | 14/18866 | 0.517964 | 0.7149285 | 0.6468927 | 2 | CCL5/HDAC1     |



|                    |            |                                                                              |        |          |          |           |           |   |              |
|--------------------|------------|------------------------------------------------------------------------------|--------|----------|----------|-----------|-----------|---|--------------|
| Biological Process | GO:0044793 | negative regulation by host of viral process                                 | 2/2279 | 14/18866 | 0.517964 | 0.7149285 | 0.6468927 | 2 | LTF/PRKN     |
| Biological Process | GO:0044794 | positive regulation by host of viral process                                 | 2/2279 | 14/18866 | 0.517964 | 0.7149285 | 0.6468927 | 2 | CSF1R/PC     |
| Biological Process | GO:0045176 | apical protein localization                                                  | 2/2279 | 14/18866 | 0.517964 | 0.7149285 | 0.6468927 | 2 | SHROOM3/JAM3 |
| Biological Process | GO:0045591 | positive regulation of regulatory T cell differentiation                     | 2/2279 | 14/18866 | 0.517964 | 0.7149285 | 0.6468927 | 2 | LILRB4/VSIR  |
| Biological Process | GO:0045799 | positive regulation of chromatin assembly or disassembly                     | 2/2279 | 14/18866 | 0.517964 | 0.7149285 | 0.6468927 | 2 | ATF7IP/DNMT1 |
| Biological Process | GO:0045898 | regulation of RNA polymerase II transcription preinitiation complex assembly | 2/2279 | 14/18866 | 0.517964 | 0.7149285 | 0.6468927 | 2 | CREB1/ATF7IP |
| Biological Process | GO:0046321 | positive regulation of fatty acid oxidation                                  | 2/2279 | 14/18866 | 0.517964 | 0.7149285 | 0.6468927 | 2 | PPARG/CPT1A  |
| Biological Process | GO:0046341 | CDP-diacylglycerol metabolic process                                         | 2/2279 | 14/18866 | 0.517964 | 0.7149285 | 0.6468927 | 2 | CDS2/AGPAT5  |
| Biological Process | GO:0046512 | sphingosine biosynthetic process                                             | 2/2279 | 14/18866 | 0.517964 | 0.7149285 | 0.6468927 | 2 | SPTLC2/SPHK2 |

|                    |            |                                                                         |        |          |          |           |           |   |              |
|--------------------|------------|-------------------------------------------------------------------------|--------|----------|----------|-----------|-----------|---|--------------|
| Biological Process | GO:0046520 | sphingoid biosynthetic process                                          | 2/2279 | 14/18866 | 0.517964 | 0.7149285 | 0.6468927 | 2 | SPTLC2/SPHK2 |
| Biological Process | GO:0046940 | nucleoside monophosphate phosphorylation                                | 2/2279 | 14/18866 | 0.517964 | 0.7149285 | 0.6468927 | 2 | AK2/AK5      |
| Biological Process | GO:0047484 | regulation of response to osmotic stress                                | 2/2279 | 14/18866 | 0.517964 | 0.7149285 | 0.6468927 | 2 | MLC1/ARHGEF2 |
| Biological Process | GO:0048291 | isotype switching to IgG isotypes                                       | 2/2279 | 14/18866 | 0.517964 | 0.7149285 | 0.6468927 | 2 | PTPRC/PAXIP1 |
| Biological Process | GO:0050667 | homocysteine metabolic process                                          | 2/2279 | 14/18866 | 0.517964 | 0.7149285 | 0.6468927 | 2 | CBS/COMT     |
| Biological Process | GO:0050930 | induction of positive chemotaxis                                        | 2/2279 | 14/18866 | 0.517964 | 0.7149285 | 0.6468927 | 2 | AZU1/IL16    |
| Biological Process | GO:0050966 | detection of mechanical stimulus involved in sensory perception of pain | 2/2279 | 14/18866 | 0.517964 | 0.7149285 | 0.6468927 | 2 | SCN1A/NTRK1  |
| Biological Process | GO:0051280 | negative regulation of release of sequestered calcium ion into cytosol  | 2/2279 | 14/18866 | 0.517964 | 0.7149285 | 0.6468927 | 2 | CASQ2/GSTO1  |
| Biological Process | GO:0051791 | medium-chain fatty acid metabolic process                               | 2/2279 | 14/18866 | 0.517964 | 0.7149285 | 0.6468927 | 2 | ACOT7/ACADM  |

|                    |            |                                                                                |        |          |          |           |           |   |                   |
|--------------------|------------|--------------------------------------------------------------------------------|--------|----------|----------|-----------|-----------|---|-------------------|
| Biological Process | GO:0060452 | positive regulation of cardiac muscle contraction                              | 2/2279 | 14/18866 | 0.517964 | 0.7149285 | 0.6468927 | 2 | NOS1AP/KCNQ1      |
| Biological Process | GO:0060707 | trophoblast giant cell differentiation                                         | 2/2279 | 14/18866 | 0.517964 | 0.7149285 | 0.6468927 | 2 | E2F7/LIF          |
| Biological Process | GO:0060732 | positive regulation of inositol phosphate biosynthetic process                 | 2/2279 | 14/18866 | 0.517964 | 0.7149285 | 0.6468927 | 2 | P2RY6/HRH1        |
| Biological Process | GO:0061051 | positive regulation of cell growth involved in cardiac muscle cell development | 2/2279 | 14/18866 | 0.517964 | 0.7149285 | 0.6468927 | 2 | MIR199A1/MIR199A2 |
| Biological Process | GO:0061983 | meiosis II cell cycle process                                                  | 2/2279 | 14/18866 | 0.517964 | 0.7149285 | 0.6468927 | 2 | PPP2R1A/RAD21L1   |
| Biological Process | GO:0070234 | positive regulation of T cell apoptotic process                                | 2/2279 | 14/18866 | 0.517964 | 0.7149285 | 0.6468927 | 2 | CCL5/ZC3H8        |
| Biological Process | GO:0070307 | lens fiber cell development                                                    | 2/2279 | 14/18866 | 0.517964 | 0.7149285 | 0.6468927 | 2 | WNT5B/TMOD1       |
| Biological Process | GO:0070486 | leukocyte aggregation                                                          | 2/2279 | 14/18866 | 0.517964 | 0.7149285 | 0.6468927 | 2 | S100A8/SEMA4D     |
| Biological Process | GO:0070669 | response to interleukin-2                                                      | 2/2279 | 14/18866 | 0.517964 | 0.7149285 | 0.6468927 | 2 | STAT5A/JAK1       |

|                    |            |                                                                  |        |          |          |           |           |   |              |
|--------------------|------------|------------------------------------------------------------------|--------|----------|----------|-----------|-----------|---|--------------|
| Biological Process | GO:0071236 | cellular response to antibiotic                                  | 2/2279 | 14/18866 | 0.517964 | 0.7149285 | 0.6468927 | 2 | MEF2C/CRIP1  |
| Biological Process | GO:0071285 | cellular response to lithium ion                                 | 2/2279 | 14/18866 | 0.517964 | 0.7149285 | 0.6468927 | 2 | CALR/CDH1    |
| Biological Process | GO:0086069 | bundle of His cell to Purkinje myocyte communication             | 2/2279 | 14/18866 | 0.517964 | 0.7149285 | 0.6468927 | 2 | GJAS/JUP     |
| Biological Process | GO:0090308 | regulation of DNA methylation-dependent heterochromatin assembly | 2/2279 | 14/18866 | 0.517964 | 0.7149285 | 0.6468927 | 2 | ATF7IP/DNMT1 |
| Biological Process | GO:0110154 | RNA decapping                                                    | 2/2279 | 14/18866 | 0.517964 | 0.7149285 | 0.6468927 | 2 | LSM1/EDC3    |
| Biological Process | GO:0110156 | methylguanosine-cap decapping                                    | 2/2279 | 14/18866 | 0.517964 | 0.7149285 | 0.6468927 | 2 | LSM1/EDC3    |
| Biological Process | GO:1901070 | guanosine-containing compound biosynthetic process               | 2/2279 | 14/18866 | 0.517964 | 0.7149285 | 0.6468927 | 2 | GUK1/IMPDH1  |
| Biological Process | GO:1901386 | negative regulation of voltage-gated calcium channel activity    | 2/2279 | 14/18866 | 0.517964 | 0.7149285 | 0.6468927 | 2 | DYSF/CBARP   |
| Biological Process | GO:1901678 | iron coordination entity transport                               | 2/2279 | 14/18866 | 0.517964 | 0.7149285 | 0.6468927 | 2 | LCN2/LTF     |

|                    |            |                                                      |         |           |           |           |           |    |                                                                                             |
|--------------------|------------|------------------------------------------------------|---------|-----------|-----------|-----------|-----------|----|---------------------------------------------------------------------------------------------|
| Biological Process | GO:1905205 | positive regulation of connective tissue replacement | 2/2279  | 14/18866  | 0.517964  | 0.7149285 | 0.6468927 | 2  | MIR199A1/MIR199A2                                                                           |
| Biological Process | GO:1990822 | basic amino acid transmembrane transport             | 2/2279  | 14/18866  | 0.517964  | 0.7149285 | 0.6468927 | 2  | SLC7A7/SLC7A1                                                                               |
| Biological Process | GO:0019395 | fatty acid oxidation                                 | 13/2279 | 106/18866 | 0.5213095 | 0.7149285 | 0.6468927 | 13 | PRKAG2/PPARG/MFSD2A/AMACR/ACOXL/ACADM/POR/ACACB/ACOX2/ACAT1/CPT1A/ACADVL/PRKAA1             |
| Biological Process | GO:0046928 | regulation of neurotransmitter secretion             | 13/2279 | 106/18866 | 0.5213095 | 0.7149285 | 0.6468927 | 13 | RAP1B/GIT1/APBA2/PRKCB/MCTP2/NF1/VPS18/CHRM2/P2RX1/DNM1L/MEF2C/DTNBP1/PRKN                  |
| Biological Process | GO:0071166 | ribonucleoprotein complex localization               | 16/2279 | 131/18866 | 0.521389  | 0.7149285 | 0.6468927 | 16 | NXF1/FIP1L1/CPSF3/SETD2/RAE1/SMG7/PABPN1/ENY2/NUP93/SEC13/SMG6/HHEX/RBM15B/NOL6/CPSF4/PCID2 |
| Biological Process | GO:0010332 | response to gamma radiation                          | 7/2279  | 56/18866  | 0.52243   | 0.7149285 | 0.6468927 | 7  | BRCA2/PTPRC/BCL2/CHEK2/BCL2L1/PRKAA1/MAP3K20                                                |
| Biological Process | GO:1904645 | response to amyloid-beta                             | 7/2279  | 56/18866  | 0.52243   | 0.7149285 | 0.6468927 | 7  | MIR140/ABCC1/FPR2/APP/IGF1R/DNM1/CACNA1B                                                    |
| Biological Process | GO:0006221 | pyrimidine nucleotide biosynthetic process           | 4/2279  | 31/18866  | 0.5252142 | 0.7149285 | 0.6468927 | 4  | UCK2/AK5/DCTD/DHODH                                                                         |
| Biological Process | GO:0006356 | regulation of transcription by RNA polymerase I      | 4/2279  | 31/18866  | 0.5252142 | 0.7149285 | 0.6468927 | 4  | WDR43/PIH1D1/MARS1/MACROH2A2                                                                |

|                    |            |                                                  |        |          |           |           |           |   |                          |
|--------------------|------------|--------------------------------------------------|--------|----------|-----------|-----------|-----------|---|--------------------------|
| Biological Process | GO:0008045 | motor neuron axon guidance                       | 4/2279 | 31/18866 | 0.5252142 | 0.7149285 | 0.6468927 | 4 | RHOH/RHOG/KIF5C/SLIT1    |
| Biological Process | GO:0014072 | response to isoquinoline alkaloid                | 4/2279 | 31/18866 | 0.5252142 | 0.7149285 | 0.6468927 | 4 | PPP1R1B/PRKCE/RELA/FADD  |
| Biological Process | GO:0018196 | peptidyl-asparagine modification                 | 4/2279 | 31/18866 | 0.5252142 | 0.7149285 | 0.6468927 | 4 | RPN1/MGAT5/ASGR2/ST6GAL1 |
| Biological Process | GO:0021799 | cerebral cortex radially oriented cell migration | 4/2279 | 31/18866 | 0.5252142 | 0.7149285 | 0.6468927 | 4 | RTN4/DISC1/ZMIZ1/NDEL1   |
| Biological Process | GO:0031114 | regulation of microtubule depolymerization       | 4/2279 | 31/18866 | 0.5252142 | 0.7149285 | 0.6468927 | 4 | NAV3/MAP1A/ARHGEF2/SPEF1 |
| Biological Process | GO:0043278 | response to morphine                             | 4/2279 | 31/18866 | 0.5252142 | 0.7149285 | 0.6468927 | 4 | PPP1R1B/PRKCE/RELA/FADD  |
| Biological Process | GO:0048710 | regulation of astrocyte differentiation          | 4/2279 | 31/18866 | 0.5252142 | 0.7149285 | 0.6468927 | 4 | BIN1/NF1/NOTCH1/LIF      |
| Biological Process | GO:0060914 | heart formation                                  | 4/2279 | 31/18866 | 0.5252142 | 0.7149285 | 0.6468927 | 4 | RBPJ/WNT11/NOTCH1/MEF2C  |
| Biological Process | GO:0061842 | microtubule organizing center localization       | 4/2279 | 31/18866 | 0.5252142 | 0.7149285 | 0.6468927 | 4 | NDE1/BICD2/NDEL1/EZR     |

|                    |            |                                                                        |         |           |           |           |           |    |                                                                                                                                                                                                                                                                                                                                                                       |
|--------------------|------------|------------------------------------------------------------------------|---------|-----------|-----------|-----------|-----------|----|-----------------------------------------------------------------------------------------------------------------------------------------------------------------------------------------------------------------------------------------------------------------------------------------------------------------------------------------------------------------------|
| Biological Process | GO:0071466 | cellular response to xenobiotic stimulus                               | 15/2279 | 123/18866 | 0.5257833 | 0.7149285 | 0.6468927 | 15 | NR1I2/ACSL1/GGT1/LPO/ABCC2/AIP/SULT1A2/POR/MGST2/GUK1/RB1/GSTO1/EPHX1/GSTO2/MTARC1                                                                                                                                                                                                                                                                                    |
| Biological Process | GO:0044728 | DNA methylation or demethylation                                       | 12/2279 | 98/18866  | 0.5263144 | 0.7149285 | 0.6468927 | 12 | PIWIL4/MOV10L1/GATAD2A/EHMT2/KDM1B/ATF7IP/GRHL2/FTO/TET2/MTA2/DNMT1/MORC1                                                                                                                                                                                                                                                                                             |
| Biological Process | GO:0072401 | signal transduction involved in DNA integrity checkpoint               | 9/2279  | 73/18866  | 0.527488  | 0.7149285 | 0.6468927 | 9  | FZR1/TFDP1/E2F7/PCBP4/ZNF385A/ARID3A/CHEK2/ABRAXAS1/BABAM2                                                                                                                                                                                                                                                                                                            |
| Biological Process | GO:0072422 | signal transduction involved in DNA damage checkpoint                  | 9/2279  | 73/18866  | 0.527488  | 0.7149285 | 0.6468927 | 9  | FZR1/TFDP1/E2F7/PCBP4/ZNF385A/ARID3A/CHEK2/ABRAXAS1/BABAM2                                                                                                                                                                                                                                                                                                            |
| Biological Process | GO:1901292 | nucleoside phosphate catabolic process                                 | 9/2279  | 73/18866  | 0.527488  | 0.7149285 | 0.6468927 | 9  | PDE4D/AMPD3/NUDT3/ACOT7/UNG/NTHL1/PDE9A/PNP/ACAT1                                                                                                                                                                                                                                                                                                                     |
| Biological Process | GO:0051346 | negative regulation of hydrolase activity                              | 57/2279 | 473/18866 | 0.5295259 | 0.7149285 | 0.6468927 | 57 | SLPI/PRKCZ/LMTK2/CSTA/TIMP2/SORL1/SERPINA1/SPOCK2/RPS6KA1/APLP2/RHOH/MGAT5/PPP1R1B/URI1/SERPINB11/PAM16/ARRB1/CABIN1/SPINT2/MIR199A1/TNF/MICAL1/SERPINB2/AIP/BIN1/THBS1/CCDC8/GNAI2/APP/UBE2O/MIR24-2/ELFN2/PHACTR2/PTPRN2/PAX2/SPHK2/FARP1/SEMA4D/AQP1/POR/DNAJB6/MCM2/SH3BP4/PSMF1/CRIM1/NOL3/ARRB2/SORT1/MIR199A2/PIH1D1/LTF/TMED2/COL28A1/WDR81/SPOCD1/PCID2/PTPA |
| Biological Process | GO:0060485 | mesenchyme development                                                 | 35/2279 | 290/18866 | 0.529641  | 0.7149285 | 0.6468927 | 35 | SEMA6B/SPRED2/NRP2/SMAD3/LDLRAD4/ANXA6/ZEB2/LOXL3/SEMA4A/RTN4/TGFBR2/SEMA4B/RBPJ/TCF7L2/SMAD7/WNT11/PAX2/FGFR1/TGFB1/SEMA4D/RDH10/TGFB11/WWTR1/ENG/BCL2/NOTCH1/CORO1C/GCNT2/MEF2C/NOTCH4/NEDD4/PDGFRB/TEAD2/ALDH1A2/NODAL                                                                                                                                             |
| Biological Process | GO:0010862 | positive regulation of pathway-restricted SMAD protein phosphorylation | 6/2279  | 48/18866  | 0.530119  | 0.7149285 | 0.6468927 | 6  | TGFB1/ENG/RBPMS/GDF6/INHBA/NODAL                                                                                                                                                                                                                                                                                                                                      |
| Biological Process | GO:0016574 | histone ubiquitination                                                 | 6/2279  | 48/18866  | 0.530119  | 0.7149285 | 0.6468927 | 6  | UHRF1/OTUB2/OTUB1/PCGF3/TRIP12/RNF40                                                                                                                                                                                                                                                                                                                                  |

|                    |            |                                                            |         |          |           |           |           |    |                                                                      |
|--------------------|------------|------------------------------------------------------------|---------|----------|-----------|-----------|-----------|----|----------------------------------------------------------------------|
| Biological Process | GO:0032784 | regulation of DNA-templated transcription, elongation      | 6/2279  | 48/18866 | 0.530119  | 0.7149285 | 0.6468927 | 6  | BRD4/WDR43/RECQL5/SCAF8/KAT7/CDK13                                   |
| Biological Process | GO:0035088 | establishment or maintenance of apical/basal cell polarity | 6/2279  | 48/18866 | 0.530119  | 0.7149285 | 0.6468927 | 6  | CRB1/ILK/WNT11/WDR1/PRKCI/MARK2                                      |
| Biological Process | GO:0045601 | regulation of endothelial cell differentiation             | 6/2279  | 48/18866 | 0.530119  | 0.7149285 | 0.6468927 | 6  | TNF/TNFRSF1A/ADD1/NOTCH1/S1PR2/NOTCH4                                |
| Biological Process | GO:0051932 | synaptic transmission, GABAergic                           | 6/2279  | 48/18866 | 0.530119  | 0.7149285 | 0.6468927 | 6  | SYN3/NISCH/NF1/CNR2/PLCL1/PRKCE                                      |
| Biological Process | GO:0055023 | positive regulation of cardiac muscle tissue growth        | 6/2279  | 48/18866 | 0.530119  | 0.7149285 | 0.6468927 | 6  | MIR199A1/RBPJ/FGFR1/MIR199A2/NOTCH1/MEF2C                            |
| Biological Process | GO:0061245 | establishment or maintenance of bipolar cell polarity      | 6/2279  | 48/18866 | 0.530119  | 0.7149285 | 0.6468927 | 6  | CRB1/ILK/WNT11/WDR1/PRKCI/MARK2                                      |
| Biological Process | GO:0090382 | phagosome maturation                                       | 6/2279  | 48/18866 | 0.530119  | 0.7149285 | 0.6468927 | 6  | RAB31/ATP6V1B2/RAB43/ATP6V0B/ATP6V0C/ATP6V1C1                        |
| Biological Process | GO:1900271 | regulation of long-term synaptic potentiation              | 6/2279  | 48/18866 | 0.530119  | 0.7149285 | 0.6468927 | 6  | CREB1/ZDHHC2/APP/AKAP5/NF1/CX3CR1                                    |
| Biological Process | GO:0043044 | ATP-dependent chromatin remodeling                         | 11/2279 | 90/18866 | 0.5317912 | 0.7149285 | 0.6468927 | 11 | CECR2/SRCAP/SMARCA2/HDAC1/ARID1B/RSF1/MTA2/SMARCD2/CHD8/CENPM/RUVBL1 |



|                    |            |                                                                |         |           |           |           |           |    |                                                                                                                   |
|--------------------|------------|----------------------------------------------------------------|---------|-----------|-----------|-----------|-----------|----|-------------------------------------------------------------------------------------------------------------------|
| Biological Process | GO:0046427 | positive regulation of receptor signaling pathway via JAK-STAT | 11/2279 | 90/18866  | 0.5317912 | 0.7149285 | 0.6468927 | 11 | IL10/TNF/CCL5/CSF1R/TNFRSF1A/IL6R/NOTCH1/F2R/CRLF1/PARP9/LIF                                                      |
| Biological Process | GO:0043271 | negative regulation of ion transport                           | 19/2279 | 157/18866 | 0.5334403 | 0.7149285 | 0.6468927 | 19 | TRIM27/KCNE1/THADA/CASQ2/TLR9/BIN1/THBS1/SLC43A2/CAB39/BCL2/GSTO1/PRKCE/SLC43A1/NEDD4/DYSF/HECW2/YWHAQ/CD33/CBARP |
| Biological Process | GO:0006687 | glycosphingolipid metabolic process                            | 8/2279  | 65/18866  | 0.5342185 | 0.7149285 | 0.6468927 | 8  | HEXB/GALC/ST8SIA6/B4GALT3/FA2H/ESYT1/CERK/PRKAA1                                                                  |
| Biological Process | GO:0006940 | regulation of smooth muscle contraction                        | 8/2279  | 65/18866  | 0.5342185 | 0.7149285 | 0.6468927 | 8  | MIR143/MIR145/CTTN/GHRL/CHRM2/P2RX1/F2R/DAPK3                                                                     |
| Biological Process | GO:0009206 | purine ribonucleoside triphosphate biosynthetic process        | 8/2279  | 65/18866  | 0.5342185 | 0.7149285 | 0.6468927 | 8  | PRKAG2/ENO1/VPS9D1/SPHK2/TGFB1/PKM/IMPDH1/ATP5PD                                                                  |
| Biological Process | GO:0017156 | calcium-ion regulated exocytosis                               | 8/2279  | 65/18866  | 0.5342185 | 0.7149285 | 0.6468927 | 8  | RAP1B/GNAI2/SYN2/NOTCH1/SYT17/ARHGAP17/RPH3AL/CBARP                                                               |
| Biological Process | GO:0035794 | positive regulation of mitochondrial membrane permeability     | 8/2279  | 65/18866  | 0.5342185 | 0.7149285 | 0.6468927 | 8  | TFDP1/YWHAH/BMF/SPG7/YWHAZ/BCL2/TP53BP2/YWHAQ                                                                     |
| Biological Process | GO:0048247 | lymphocyte chemotaxis                                          | 8/2279  | 65/18866  | 0.5342185 | 0.7149285 | 0.6468927 | 8  | PIK3CD/CCR2/CCL5/PADI2/CCL20/C10orf99/CCL27/CCL22                                                                 |
| Biological Process | GO:1902807 | negative regulation of cell cycle G1/S phase transition        | 16/2279 | 132/18866 | 0.5342608 | 0.7149285 | 0.6468927 | 16 | TFDP1/PRMT2/FBXO7/E2F7/CTDSPL/PCBP4/RIPK1/NACC2/ZNF385A/ARID3A/C10orf99/GFI1B/MIR138-2/RB1/BCL2/CHEK2             |

|                    |            |                                                    |         |           |           |           |           |    |                                                                                                                                       |
|--------------------|------------|----------------------------------------------------|---------|-----------|-----------|-----------|-----------|----|---------------------------------------------------------------------------------------------------------------------------------------|
| Biological Process | GO:0043266 | regulation of potassium ion transport              | 13/2279 | 107/18866 | 0.5355962 | 0.7149285 | 0.6468927 | 13 | KCNE1/KCNAB2/CASQ2/WWP2/DNM2/BIN1/NOS1AP/KCNIP1/CAB39/KCNQ1/NEDD4/ANO6/ANK2                                                           |
| Biological Process | GO:0051963 | regulation of synapse assembly                     | 13/2279 | 107/18866 | 0.5355962 | 0.7149285 | 0.6468927 | 13 | COLQ/EPHB3/SEMA4A/APP/SEMA4D/NRXN1/GHRL/NTRK1/MEF2C/SLIT1/CUX2/EIF4G1/NECTIN1                                                         |
| Biological Process | GO:0090174 | organelle membrane fusion                          | 13/2279 | 107/18866 | 0.5355962 | 0.7149285 | 0.6468927 | 13 | CALR/STX5/VTI1A/ANKFY1/TGFBRAP1/UVRAG/VPS18/VCPIP1/DYSF/TSNARE1/VAV3/IRAG2/RUBCNL                                                     |
| Biological Process | GO:0035725 | sodium ion transmembrane transport                 | 21/2279 | 174/18866 | 0.5368079 | 0.7149285 | 0.6468927 | 21 | TRPM2/FXYD2/YWHAH/SLC24A4/FXYD1/SLC8A1/DNM2/TESC/ACTN4/SCN1A/ASIC4/SNTA1/PRKCE/SLC5A10/NEDD4/ANO6/HECW2/SLC12A1/SLC23A1/FGF14/SLC41A1 |
| Biological Process | GO:0097696 | receptor signaling pathway via STAT                | 21/2279 | 174/18866 | 0.5368079 | 0.7149285 | 0.6468927 | 21 | IL10/MGAT5/CCR2/PIGU/TNF/CCL5/CSF1R/STAT5A/TNFRSF1A/FER/PTPRC/IL6R/PPP2R1A/NOTCH1/GGNBP2/F2R/BCL3/INPP5F/CRLF1/PARP9/LIF              |
| Biological Process | GO:0000715 | nucleotide-excision repair, DNA damage recognition | 3/2279  | 23/18866  | 0.5375319 | 0.7149285 | 0.6468927 | 3  | COP55/COPS3/XPA                                                                                                                       |
| Biological Process | GO:0006590 | thyroid hormone generation                         | 3/2279  | 23/18866  | 0.5375319 | 0.7149285 | 0.6468927 | 3  | TG/CPQ/CTSB                                                                                                                           |
| Biological Process | GO:0007035 | vacuolar acidification                             | 3/2279  | 23/18866  | 0.5375319 | 0.7149285 | 0.6468927 | 3  | SLC11A1/GRN/CLN5                                                                                                                      |
| Biological Process | GO:0009068 | aspartate family amino acid catabolic process      | 3/2279  | 23/18866  | 0.5375319 | 0.7149285 | 0.6468927 | 3  | OGDH/MAT1A/CRYM                                                                                                                       |

|                    |            |                                                             |        |          |           |           |           |   |                     |
|--------------------|------------|-------------------------------------------------------------|--------|----------|-----------|-----------|-----------|---|---------------------|
| Biological Process | GO:0010155 | regulation of proton transport                              | 3/2279 | 23/18866 | 0.5375319 | 0.7149285 | 0.6468927 | 3 | TESC/ACTN4/SPHK2    |
| Biological Process | GO:0010226 | response to lithium ion                                     | 3/2279 | 23/18866 | 0.5375319 | 0.7149285 | 0.6468927 | 3 | CALR/EIF2B5/CDH1    |
| Biological Process | GO:0010288 | response to lead ion                                        | 3/2279 | 23/18866 | 0.5375319 | 0.7149285 | 0.6468927 | 3 | APP/FECH/CAT        |
| Biological Process | GO:0032693 | negative regulation of interleukin-10 production            | 3/2279 | 23/18866 | 0.5375319 | 0.7149285 | 0.6468927 | 3 | DLL1/TNFRSF21/V SIR |
| Biological Process | GO:0032799 | low-density lipoprotein receptor particle metabolic process | 3/2279 | 23/18866 | 0.5375319 | 0.7149285 | 0.6468927 | 3 | AP2A1/PPARG/ITGB3   |
| Biological Process | GO:0035162 | embryonic hemopoiesis                                       | 3/2279 | 23/18866 | 0.5375319 | 0.7149285 | 0.6468927 | 3 | ZFPM1/TGFBR2/STK3   |
| Biological Process | GO:0035812 | renal sodium excretion                                      | 3/2279 | 23/18866 | 0.5375319 | 0.7149285 | 0.6468927 | 3 | COMT/GNAI2/AGTR1    |
| Biological Process | GO:0043576 | regulation of respiratory gaseous exchange                  | 3/2279 | 23/18866 | 0.5375319 | 0.7149285 | 0.6468927 | 3 | PHOX2A/MTG2/FTO     |
| Biological Process | GO:0043586 | tongue development                                          | 3/2279 | 23/18866 | 0.5375319 | 0.7149285 | 0.6468927 | 3 | HDAC1/PRDM16/NTF4   |

|                    |            |                                                            |         |          |           |           |           |    |                                                           |
|--------------------|------------|------------------------------------------------------------|---------|----------|-----------|-----------|-----------|----|-----------------------------------------------------------|
| Biological Process | GO:0046135 | pyrimidine nucleoside catabolic process                    | 3/2279  | 23/18866 | 0.5375319 | 0.7149285 | 0.6468927 | 3  | CDA/DPYS/UPB1                                             |
| Biological Process | GO:0060479 | lung cell differentiation                                  | 3/2279  | 23/18866 | 0.5375319 | 0.7149285 | 0.6468927 | 3  | CREB1/RBPJ/GRHL2                                          |
| Biological Process | GO:0072677 | eosinophil migration                                       | 3/2279  | 23/18866 | 0.5375319 | 0.7149285 | 0.6468927 | 3  | CCL5/HRH1/DAPK2                                           |
| Biological Process | GO:0097150 | neuronal stem cell population maintenance                  | 3/2279  | 23/18866 | 0.5375319 | 0.7149285 | 0.6468927 | 3  | DLL1/NOTCH1/FOXO1                                         |
| Biological Process | GO:2000178 | negative regulation of neural precursor cell proliferation | 3/2279  | 23/18866 | 0.5375319 | 0.7149285 | 0.6468927 | 3  | SPINT2/ILK/NF1                                            |
| Biological Process | GO:0009142 | nucleoside triphosphate biosynthetic process               | 10/2279 | 82/18866 | 0.5378438 | 0.7149285 | 0.6468927 | 10 | PRKAG2/ENO1/VPS9D1/SPHK2/TGFB1/UCK2/PKM/AK5/IMPDH1/ATP5PD |
| Biological Process | GO:0000019 | regulation of mitotic recombination                        | 1/2279  | 6/18866  | 0.5381716 | 0.7149285 | 0.6468927 | 1  | ERCC2                                                     |
| Biological Process | GO:0000389 | mRNA 3'-splice site recognition                            | 1/2279  | 6/18866  | 0.5381716 | 0.7149285 | 0.6468927 | 1  | SF1                                                       |
| Biological Process | GO:0000957 | mitochondrial RNA catabolic process                        | 1/2279  | 6/18866  | 0.5381716 | 0.7149285 | 0.6468927 | 1  | GRSF1                                                     |

|                    |            |                                                                                    |        |         |           |           |           |   |        |
|--------------------|------------|------------------------------------------------------------------------------------|--------|---------|-----------|-----------|-----------|---|--------|
| Biological Process | GO:0001692 | histamine metabolic process                                                        | 1/2279 | 6/18866 | 0.5381716 | 0.7149285 | 0.6468927 | 1 | HNMT   |
| Biological Process | GO:0001996 | positive regulation of heart rate by epinephrine-norepinephrine                    | 1/2279 | 6/18866 | 0.5381716 | 0.7149285 | 0.6468927 | 1 | PDE4D  |
| Biological Process | GO:0002036 | regulation of L-glutamate import across plasma membrane                            | 1/2279 | 6/18866 | 0.5381716 | 0.7149285 | 0.6468927 | 1 | PER2   |
| Biological Process | GO:0002278 | eosinophil activation involved in immune response                                  | 1/2279 | 6/18866 | 0.5381716 | 0.7149285 | 0.6468927 | 1 | CCR2   |
| Biological Process | GO:0002361 | CD4-positive, CD25-positive, alpha-beta regulatory T cell differentiation          | 1/2279 | 6/18866 | 0.5381716 | 0.7149285 | 0.6468927 | 1 | FUT7   |
| Biological Process | GO:0002447 | eosinophil mediated immunity                                                       | 1/2279 | 6/18866 | 0.5381716 | 0.7149285 | 0.6468927 | 1 | CCR2   |
| Biological Process | GO:0002476 | antigen processing and presentation of endogenous peptide antigen via MHC class Ib | 1/2279 | 6/18866 | 0.5381716 | 0.7149285 | 0.6468927 | 1 | HLA-F  |
| Biological Process | GO:0002666 | positive regulation of T cell tolerance induction                                  | 1/2279 | 6/18866 | 0.5381716 | 0.7149285 | 0.6468927 | 1 | TGFBR2 |
| Biological Process | GO:0002775 | antimicrobial peptide production                                                   | 1/2279 | 6/18866 | 0.5381716 | 0.7149285 | 0.6468927 | 1 | ELANE  |

|                    |            |                                                                                                     |        |         |           |           |           |   |        |
|--------------------|------------|-----------------------------------------------------------------------------------------------------|--------|---------|-----------|-----------|-----------|---|--------|
| Biological Process | GO:0002778 | antibacterial peptide production                                                                    | 1/2279 | 6/18866 | 0.5381716 | 0.7149285 | 0.6468927 | 1 | ELANE  |
| Biological Process | GO:0002860 | positive regulation of natural killer cell mediated cytotoxicity directed against tumor cell target | 1/2279 | 6/18866 | 0.5381716 | 0.7149285 | 0.6468927 | 1 | CD226  |
| Biological Process | GO:0003010 | voluntary skeletal muscle contraction                                                               | 1/2279 | 6/18866 | 0.5381716 | 0.7149285 | 0.6468927 | 1 | MB     |
| Biological Process | GO:0003057 | regulation of the force of heart contraction by chemical signal                                     | 1/2279 | 6/18866 | 0.5381716 | 0.7149285 | 0.6468927 | 1 | GRK2   |
| Biological Process | GO:0003096 | renal sodium ion transport                                                                          | 1/2279 | 6/18866 | 0.5381716 | 0.7149285 | 0.6468927 | 1 | SGK1   |
| Biological Process | GO:0003348 | cardiac endothelial cell differentiation                                                            | 1/2279 | 6/18866 | 0.5381716 | 0.7149285 | 0.6468927 | 1 | NOTCH1 |
| Biological Process | GO:0003402 | planar cell polarity pathway involved in axis elongation                                            | 1/2279 | 6/18866 | 0.5381716 | 0.7149285 | 0.6468927 | 1 | WNT11  |
| Biological Process | GO:0005981 | regulation of glycogen catabolic process                                                            | 1/2279 | 6/18866 | 0.5381716 | 0.7149285 | 0.6468927 | 1 | PPP1CB |
| Biological Process | GO:0006105 | succinate metabolic process                                                                         | 1/2279 | 6/18866 | 0.5381716 | 0.7149285 | 0.6468927 | 1 | SDHAF3 |

|                    |            |                                                                |        |         |           |           |           |   |        |
|--------------------|------------|----------------------------------------------------------------|--------|---------|-----------|-----------|-----------|---|--------|
| Biological Process | GO:0006207 | 'de novo' pyrimidine nucleobase biosynthetic process           | 1/2279 | 6/18866 | 0.5381716 | 0.7149285 | 0.6468927 | 1 | DHODH  |
| Biological Process | GO:0006287 | base-excision repair, gap-filling                              | 1/2279 | 6/18866 | 0.5381716 | 0.7149285 | 0.6468927 | 1 | POLE   |
| Biological Process | GO:0006552 | leucine catabolic process                                      | 1/2279 | 6/18866 | 0.5381716 | 0.7149285 | 0.6468927 | 1 | HMGCL  |
| Biological Process | GO:0007354 | zygotic determination of anterior/posterior axis, embryo       | 1/2279 | 6/18866 | 0.5381716 | 0.7149285 | 0.6468927 | 1 | PCSK6  |
| Biological Process | GO:0009125 | nucleoside monophosphate catabolic process                     | 1/2279 | 6/18866 | 0.5381716 | 0.7149285 | 0.6468927 | 1 | AMPD3  |
| Biological Process | GO:0009176 | pyrimidine deoxyribonucleoside monophosphate metabolic process | 1/2279 | 6/18866 | 0.5381716 | 0.7149285 | 0.6468927 | 1 | DCTD   |
| Biological Process | GO:0009744 | response to sucrose                                            | 1/2279 | 6/18866 | 0.5381716 | 0.7149285 | 0.6468927 | 1 | ERCC1  |
| Biological Process | GO:0009757 | hexose mediated signaling                                      | 1/2279 | 6/18866 | 0.5381716 | 0.7149285 | 0.6468927 | 1 | PIH1D1 |
| Biological Process | GO:0010182 | sugar mediated signaling pathway                               | 1/2279 | 6/18866 | 0.5381716 | 0.7149285 | 0.6468927 | 1 | PIH1D1 |

|                    |            |                                                                           |        |         |           |           |           |   |          |
|--------------------|------------|---------------------------------------------------------------------------|--------|---------|-----------|-----------|-----------|---|----------|
| Biological Process | GO:0010255 | glucose mediated signaling pathway                                        | 1/2279 | 6/18866 | 0.5381716 | 0.7149285 | 0.6468927 | 1 | PIH1D1   |
| Biological Process | GO:0010513 | positive regulation of phosphatidylinositol biosynthetic process          | 1/2279 | 6/18866 | 0.5381716 | 0.7149285 | 0.6468927 | 1 | FPR2     |
| Biological Process | GO:0010754 | negative regulation of cGMP-mediated signaling                            | 1/2279 | 6/18866 | 0.5381716 | 0.7149285 | 0.6468927 | 1 | THBS1    |
| Biological Process | GO:0010793 | regulation of mRNA export from nucleus                                    | 1/2279 | 6/18866 | 0.5381716 | 0.7149285 | 0.6468927 | 1 | SETD2    |
| Biological Process | GO:0010983 | positive regulation of high-density lipoprotein particle clearance        | 1/2279 | 6/18866 | 0.5381716 | 0.7149285 | 0.6468927 | 1 | GPLD1    |
| Biological Process | GO:0010990 | regulation of SMAD protein complex assembly                               | 1/2279 | 6/18866 | 0.5381716 | 0.7149285 | 0.6468927 | 1 | LDLRAD4  |
| Biological Process | GO:0014721 | twitch skeletal muscle contraction                                        | 1/2279 | 6/18866 | 0.5381716 | 0.7149285 | 0.6468927 | 1 | MB       |
| Biological Process | GO:0015015 | heparan sulfate proteoglycan biosynthetic process, enzymatic modification | 1/2279 | 6/18866 | 0.5381716 | 0.7149285 | 0.6468927 | 1 | HS3ST3B1 |
| Biological Process | GO:0015677 | copper ion import                                                         | 1/2279 | 6/18866 | 0.5381716 | 0.7149285 | 0.6468927 | 1 | ATP7B    |



|                    |            |                                                          |        |         |           |           |           |   |           |
|--------------------|------------|----------------------------------------------------------|--------|---------|-----------|-----------|-----------|---|-----------|
| Biological Process | GO:0015712 | hexose phosphate transport                               | 1/2279 | 6/18866 | 0.5381716 | 0.7149285 | 0.6468927 | 1 | SLC37A1   |
| Biological Process | GO:0015734 | taurine transport                                        | 1/2279 | 6/18866 | 0.5381716 | 0.7149285 | 0.6468927 | 1 | LRRRC8C   |
| Biological Process | GO:0015747 | urate transport                                          | 1/2279 | 6/18866 | 0.5381716 | 0.7149285 | 0.6468927 | 1 | SLC2A9    |
| Biological Process | GO:0015760 | glucose-6-phosphate transport                            | 1/2279 | 6/18866 | 0.5381716 | 0.7149285 | 0.6468927 | 1 | SLC37A1   |
| Biological Process | GO:0015961 | diadenosine polyphosphate catabolic process              | 1/2279 | 6/18866 | 0.5381716 | 0.7149285 | 0.6468927 | 1 | NUDT3     |
| Biological Process | GO:0016255 | attachment of GPI anchor to protein                      | 1/2279 | 6/18866 | 0.5381716 | 0.7149285 | 0.6468927 | 1 | PIGU      |
| Biological Process | GO:0016479 | negative regulation of transcription by RNA polymerase I | 1/2279 | 6/18866 | 0.5381716 | 0.7149285 | 0.6468927 | 1 | MACROH2A2 |
| Biological Process | GO:0021631 | optic nerve morphogenesis                                | 1/2279 | 6/18866 | 0.5381716 | 0.7149285 | 0.6468927 | 1 | PAX2      |
| Biological Process | GO:0021869 | forebrain ventricular zone progenitor cell division      | 1/2279 | 6/18866 | 0.5381716 | 0.7149285 | 0.6468927 | 1 | FGFR1     |

|                    |            |                                                                 |        |         |           |           |           |   |          |
|--------------------|------------|-----------------------------------------------------------------|--------|---------|-----------|-----------|-----------|---|----------|
| Biological Process | GO:0021873 | forebrain neuroblast division                                   | 1/2279 | 6/18866 | 0.5381716 | 0.7149285 | 0.6468927 | 1 | FGFR1    |
| Biological Process | GO:0022605 | mammalian oogenesis stage                                       | 1/2279 | 6/18866 | 0.5381716 | 0.7149285 | 0.6468927 | 1 | BMPR1B   |
| Biological Process | GO:0030240 | skeletal muscle thin filament assembly                          | 1/2279 | 6/18866 | 0.5381716 | 0.7149285 | 0.6468927 | 1 | TTN      |
| Biological Process | GO:0030885 | regulation of myeloid dendritic cell activation                 | 1/2279 | 6/18866 | 0.5381716 | 0.7149285 | 0.6468927 | 1 | IL10     |
| Biological Process | GO:0031087 | deadenylation-independent decapping of nuclear-transcribed mRNA | 1/2279 | 6/18866 | 0.5381716 | 0.7149285 | 0.6468927 | 1 | EDC3     |
| Biological Process | GO:0032020 | ISG15-protein conjugation                                       | 1/2279 | 6/18866 | 0.5381716 | 0.7149285 | 0.6468927 | 1 | HERC5    |
| Biological Process | GO:0032696 | negative regulation of interleukin-13 production                | 1/2279 | 6/18866 | 0.5381716 | 0.7149285 | 0.6468927 | 1 | TNFRSF21 |
| Biological Process | GO:0032792 | negative regulation of CREB transcription factor activity       | 1/2279 | 6/18866 | 0.5381716 | 0.7149285 | 0.6468927 | 1 | ADGRG3   |
| Biological Process | GO:0033299 | secretion of lysosomal enzymes                                  | 1/2279 | 6/18866 | 0.5381716 | 0.7149285 | 0.6468927 | 1 | NR1H2    |

|                    |            |                                                                |        |         |           |           |           |   |        |
|--------------------|------------|----------------------------------------------------------------|--------|---------|-----------|-----------|-----------|---|--------|
| Biological Process | GO:0033634 | positive regulation of cell-cell adhesion mediated by integrin | 1/2279 | 6/18866 | 0.5381716 | 0.7149285 | 0.6468927 | 1 | CCL5   |
| Biological Process | GO:0034201 | response to oleic acid                                         | 1/2279 | 6/18866 | 0.5381716 | 0.7149285 | 0.6468927 | 1 | ACSL1  |
| Biological Process | GO:0034285 | response to disaccharide                                       | 1/2279 | 6/18866 | 0.5381716 | 0.7149285 | 0.6468927 | 1 | ERCC1  |
| Biological Process | GO:0035511 | oxidative DNA demethylation                                    | 1/2279 | 6/18866 | 0.5381716 | 0.7149285 | 0.6468927 | 1 | FTO    |
| Biological Process | GO:0035519 | protein K29-linked ubiquitination                              | 1/2279 | 6/18866 | 0.5381716 | 0.7149285 | 0.6468927 | 1 | PRKN   |
| Biological Process | GO:0035931 | mineralocorticoid secretion                                    | 1/2279 | 6/18866 | 0.5381716 | 0.7149285 | 0.6468927 | 1 | AGTR1  |
| Biological Process | GO:0035932 | aldosterone secretion                                          | 1/2279 | 6/18866 | 0.5381716 | 0.7149285 | 0.6468927 | 1 | AGTR1  |
| Biological Process | GO:0035964 | COPI-coated vesicle budding                                    | 1/2279 | 6/18866 | 0.5381716 | 0.7149285 | 0.6468927 | 1 | TMED2  |
| Biological Process | GO:0036015 | response to interleukin-3                                      | 1/2279 | 6/18866 | 0.5381716 | 0.7149285 | 0.6468927 | 1 | CSF2RB |

|                    |            |                                                                       |        |         |           |           |           |   |        |
|--------------------|------------|-----------------------------------------------------------------------|--------|---------|-----------|-----------|-----------|---|--------|
| Biological Process | GO:0036016 | cellular response to interleukin-3                                    | 1/2279 | 6/18866 | 0.5381716 | 0.7149285 | 0.6468927 | 1 | CSF2RB |
| Biological Process | GO:0036492 | eIF2alpha phosphorylation in response to endoplasmic reticulum stress | 1/2279 | 6/18866 | 0.5381716 | 0.7149285 | 0.6468927 | 1 | NCK2   |
| Biological Process | GO:0042364 | water-soluble vitamin biosynthetic process                            | 1/2279 | 6/18866 | 0.5381716 | 0.7149285 | 0.6468927 | 1 | PDXK   |
| Biological Process | GO:0042636 | negative regulation of hair cycle                                     | 1/2279 | 6/18866 | 0.5381716 | 0.7149285 | 0.6468927 | 1 | CDH3   |
| Biological Process | GO:0042661 | regulation of mesodermal cell fate specification                      | 1/2279 | 6/18866 | 0.5381716 | 0.7149285 | 0.6468927 | 1 | FGFR1  |
| Biological Process | GO:0042918 | alkanesulfonate transport                                             | 1/2279 | 6/18866 | 0.5381716 | 0.7149285 | 0.6468927 | 1 | LRR8C  |
| Biological Process | GO:0042939 | tripeptide transport                                                  | 1/2279 | 6/18866 | 0.5381716 | 0.7149285 | 0.6468927 | 1 | ABCC1  |
| Biological Process | GO:0043305 | negative regulation of mast cell degranulation                        | 1/2279 | 6/18866 | 0.5381716 | 0.7149285 | 0.6468927 | 1 | CD84   |
| Biological Process | GO:0043308 | eosinophil degranulation                                              | 1/2279 | 6/18866 | 0.5381716 | 0.7149285 | 0.6468927 | 1 | CCR2   |

|                    |            |                                                               |        |         |           |           |           |   |          |
|--------------------|------------|---------------------------------------------------------------|--------|---------|-----------|-----------|-----------|---|----------|
| Biological Process | GO:0043553 | negative regulation of phosphatidylinositol 3-kinase activity | 1/2279 | 6/18866 | 0.5381716 | 0.7149285 | 0.6468927 | 1 | MIR138-2 |
| Biological Process | GO:0044531 | modulation of programmed cell death in other organism         | 1/2279 | 6/18866 | 0.5381716 | 0.7149285 | 0.6468927 | 1 | BCL2L1   |
| Biological Process | GO:0044532 | modulation of apoptotic process in other organism             | 1/2279 | 6/18866 | 0.5381716 | 0.7149285 | 0.6468927 | 1 | BCL2L1   |
| Biological Process | GO:0045046 | protein import into peroxisome membrane                       | 1/2279 | 6/18866 | 0.5381716 | 0.7149285 | 0.6468927 | 1 | PEX26    |
| Biological Process | GO:0045112 | integrin biosynthetic process                                 | 1/2279 | 6/18866 | 0.5381716 | 0.7149285 | 0.6468927 | 1 | COL5A1   |
| Biological Process | GO:0045347 | negative regulation of MHC class II biosynthetic process      | 1/2279 | 6/18866 | 0.5381716 | 0.7149285 | 0.6468927 | 1 | IL10     |
| Biological Process | GO:0045627 | positive regulation of T-helper 1 cell differentiation        | 1/2279 | 6/18866 | 0.5381716 | 0.7149285 | 0.6468927 | 1 | HLX      |
| Biological Process | GO:0045917 | positive regulation of complement activation                  | 1/2279 | 6/18866 | 0.5381716 | 0.7149285 | 0.6468927 | 1 | PHB      |
| Biological Process | GO:0045938 | positive regulation of circadian sleep/wake cycle, sleep      | 1/2279 | 6/18866 | 0.5381716 | 0.7149285 | 0.6468927 | 1 | GHRL     |

|                    |            |                                                               |        |         |           |           |           |   |          |
|--------------------|------------|---------------------------------------------------------------|--------|---------|-----------|-----------|-----------|---|----------|
| Biological Process | GO:0046137 | negative regulation of vitamin metabolic process              | 1/2279 | 6/18866 | 0.5381716 | 0.7149285 | 0.6468927 | 1 | GFI1     |
| Biological Process | GO:0046826 | negative regulation of protein export from nucleus            | 1/2279 | 6/18866 | 0.5381716 | 0.7149285 | 0.6468927 | 1 | SP100    |
| Biological Process | GO:0046880 | regulation of follicle-stimulating hormone secretion          | 1/2279 | 6/18866 | 0.5381716 | 0.7149285 | 0.6468927 | 1 | INHBA    |
| Biological Process | GO:0046881 | positive regulation of follicle-stimulating hormone secretion | 1/2279 | 6/18866 | 0.5381716 | 0.7149285 | 0.6468927 | 1 | INHBA    |
| Biological Process | GO:0046958 | nonassociative learning                                       | 1/2279 | 6/18866 | 0.5381716 | 0.7149285 | 0.6468927 | 1 | MAPK8IP2 |
| Biological Process | GO:0048200 | Golgi transport vesicle coating                               | 1/2279 | 6/18866 | 0.5381716 | 0.7149285 | 0.6468927 | 1 | TMED2    |
| Biological Process | GO:0048205 | COP1 coating of Golgi vesicle                                 | 1/2279 | 6/18866 | 0.5381716 | 0.7149285 | 0.6468927 | 1 | TMED2    |
| Biological Process | GO:0050904 | diapedesis                                                    | 1/2279 | 6/18866 | 0.5381716 | 0.7149285 | 0.6468927 | 1 | FER      |
| Biological Process | GO:0051026 | chiasma assembly                                              | 1/2279 | 6/18866 | 0.5381716 | 0.7149285 | 0.6468927 | 1 | RNF212   |

|                    |            |                                                                                                 |        |         |           |           |           |   |         |
|--------------------|------------|-------------------------------------------------------------------------------------------------|--------|---------|-----------|-----------|-----------|---|---------|
| Biological Process | GO:0051105 | regulation of DNA ligation                                                                      | 1/2279 | 6/18866 | 0.5381716 | 0.7149285 | 0.6468927 | 1 | TFIP11  |
| Biological Process | GO:0051344 | negative regulation of cyclic-nucleotide phosphodiesterase activity                             | 1/2279 | 6/18866 | 0.5381716 | 0.7149285 | 0.6468927 | 1 | AIP     |
| Biological Process | GO:0051415 | microtubule nucleation by interphase microtubule organizing center                              | 1/2279 | 6/18866 | 0.5381716 | 0.7149285 | 0.6468927 | 1 | TUBGCP2 |
| Biological Process | GO:0051454 | intracellular pH elevation                                                                      | 1/2279 | 6/18866 | 0.5381716 | 0.7149285 | 0.6468927 | 1 | BCL2    |
| Biological Process | GO:0051792 | medium-chain fatty acid biosynthetic process                                                    | 1/2279 | 6/18866 | 0.5381716 | 0.7149285 | 0.6468927 | 1 | ACOT7   |
| Biological Process | GO:0052150 | modulation by symbiont of host apoptotic process                                                | 1/2279 | 6/18866 | 0.5381716 | 0.7149285 | 0.6468927 | 1 | BCL2L1  |
| Biological Process | GO:0052248 | modulation of programmed cell death in other organism involved in symbiotic interaction         | 1/2279 | 6/18866 | 0.5381716 | 0.7149285 | 0.6468927 | 1 | BCL2L1  |
| Biological Process | GO:0052433 | modulation by organism of apoptotic process in other organism involved in symbiotic interaction | 1/2279 | 6/18866 | 0.5381716 | 0.7149285 | 0.6468927 | 1 | BCL2L1  |
| Biological Process | GO:0055009 | atrial cardiac muscle tissue morphogenesis                                                      | 1/2279 | 6/18866 | 0.5381716 | 0.7149285 | 0.6468927 | 1 | ENG     |

|                    |            |                                                                   |        |         |           |           |           |   |         |
|--------------------|------------|-------------------------------------------------------------------|--------|---------|-----------|-----------|-----------|---|---------|
| Biological Process | GO:0055059 | asymmetric neuroblast division                                    | 1/2279 | 6/18866 | 0.5381716 | 0.7149285 | 0.6468927 | 1 | ARHGEF2 |
| Biological Process | GO:0060264 | regulation of respiratory burst involved in inflammatory response | 1/2279 | 6/18866 | 0.5381716 | 0.7149285 | 0.6468927 | 1 | GRN     |
| Biological Process | GO:0060318 | definitive erythrocyte differentiation                            | 1/2279 | 6/18866 | 0.5381716 | 0.7149285 | 0.6468927 | 1 | ZFPM1   |
| Biological Process | GO:0060426 | lung vasculature development                                      | 1/2279 | 6/18866 | 0.5381716 | 0.7149285 | 0.6468927 | 1 | LIF     |
| Biological Process | GO:0060440 | trachea formation                                                 | 1/2279 | 6/18866 | 0.5381716 | 0.7149285 | 0.6468927 | 1 | TGFBR2  |
| Biological Process | GO:0060687 | regulation of branching involved in prostate gland morphogenesis  | 1/2279 | 6/18866 | 0.5381716 | 0.7149285 | 0.6468927 | 1 | RXRA    |
| Biological Process | GO:0060729 | intestinal epithelial structure maintenance                       | 1/2279 | 6/18866 | 0.5381716 | 0.7149285 | 0.6468927 | 1 | SLC22A5 |
| Biological Process | GO:0060745 | mammary gland branching involved in pregnancy                     | 1/2279 | 6/18866 | 0.5381716 | 0.7149285 | 0.6468927 | 1 | VDR     |
| Biological Process | GO:0060897 | neural plate regionalization                                      | 1/2279 | 6/18866 | 0.5381716 | 0.7149285 | 0.6468927 | 1 | SSBP3   |



|                    |            |                                                                                 |        |         |           |           |           |   |        |
|--------------------|------------|---------------------------------------------------------------------------------|--------|---------|-----------|-----------|-----------|---|--------|
| Biological Process | GO:0060956 | endocardial cell differentiation                                                | 1/2279 | 6/18866 | 0.5381716 | 0.7149285 | 0.6468927 | 1 | NOTCH1 |
| Biological Process | GO:0060979 | vasculogenesis involved in coronary vascular morphogenesis                      | 1/2279 | 6/18866 | 0.5381716 | 0.7149285 | 0.6468927 | 1 | NOTCH1 |
| Biological Process | GO:0061046 | regulation of branching involved in lung morphogenesis                          | 1/2279 | 6/18866 | 0.5381716 | 0.7149285 | 0.6468927 | 1 | TNF    |
| Biological Process | GO:0061196 | fungiform papilla development                                                   | 1/2279 | 6/18866 | 0.5381716 | 0.7149285 | 0.6468927 | 1 | HDAC1  |
| Biological Process | GO:0061304 | retinal blood vessel morphogenesis                                              | 1/2279 | 6/18866 | 0.5381716 | 0.7149285 | 0.6468927 | 1 | LRP5L  |
| Biological Process | GO:0061317 | canonical Wnt signaling pathway involved in cardiac muscle cell fate commitment | 1/2279 | 6/18866 | 0.5381716 | 0.7149285 | 0.6468927 | 1 | RBPJ   |
| Biological Process | GO:0061470 | T follicular helper cell differentiation                                        | 1/2279 | 6/18866 | 0.5381716 | 0.7149285 | 0.6468927 | 1 | FOXP1  |
| Biological Process | GO:0061550 | cranial ganglion development                                                    | 1/2279 | 6/18866 | 0.5381716 | 0.7149285 | 0.6468927 | 1 | NRP2   |
| Biological Process | GO:0061757 | leukocyte adhesion to arterial endothelial cell                                 | 1/2279 | 6/18866 | 0.5381716 | 0.7149285 | 0.6468927 | 1 | TNF    |

|                    |            |                                                                                        |        |         |           |           |           |   |         |
|--------------------|------------|----------------------------------------------------------------------------------------|--------|---------|-----------|-----------|-----------|---|---------|
| Biological Process | GO:0070070 | proton-transporting V-type ATPase complex assembly                                     | 1/2279 | 6/18866 | 0.5381716 | 0.7149285 | 0.6468927 | 1 | TM9SF4  |
| Biological Process | GO:0070257 | positive regulation of mucus secretion                                                 | 1/2279 | 6/18866 | 0.5381716 | 0.7149285 | 0.6468927 | 1 | PRKCE   |
| Biological Process | GO:0070432 | regulation of nucleotide-binding oligomerization domain containing 2 signaling pathway | 1/2279 | 6/18866 | 0.5381716 | 0.7149285 | 0.6468927 | 1 | TNFAIP3 |
| Biological Process | GO:0070814 | hydrogen sulfide biosynthetic process                                                  | 1/2279 | 6/18866 | 0.5381716 | 0.7149285 | 0.6468927 | 1 | CBS     |
| Biological Process | GO:0070842 | aggresome assembly                                                                     | 1/2279 | 6/18866 | 0.5381716 | 0.7149285 | 0.6468927 | 1 | PRKN    |
| Biological Process | GO:0071029 | nuclear ncRNA surveillance                                                             | 1/2279 | 6/18866 | 0.5381716 | 0.7149285 | 0.6468927 | 1 | EXOSC2  |
| Biological Process | GO:0071035 | nuclear polyadenylation-dependent rRNA catabolic process                               | 1/2279 | 6/18866 | 0.5381716 | 0.7149285 | 0.6468927 | 1 | EXOSC2  |
| Biological Process | GO:0071038 | nuclear polyadenylation-dependent tRNA catabolic process                               | 1/2279 | 6/18866 | 0.5381716 | 0.7149285 | 0.6468927 | 1 | EXOSC2  |
| Biological Process | GO:0071046 | nuclear polyadenylation-dependent ncRNA catabolic process                              | 1/2279 | 6/18866 | 0.5381716 | 0.7149285 | 0.6468927 | 1 | EXOSC2  |

|                    |            |                                                                     |        |         |           |           |           |   |         |
|--------------------|------------|---------------------------------------------------------------------|--------|---------|-----------|-----------|-----------|---|---------|
| Biological Process | GO:0071321 | cellular response to cGMP                                           | 1/2279 | 6/18866 | 0.5381716 | 0.7149285 | 0.6468927 | 1 | RAPGEF2 |
| Biological Process | GO:0071608 | macrophage inflammatory protein-1 alpha production                  | 1/2279 | 6/18866 | 0.5381716 | 0.7149285 | 0.6468927 | 1 | MEFV    |
| Biological Process | GO:0071638 | negative regulation of monocyte chemotactic protein-1 production    | 1/2279 | 6/18866 | 0.5381716 | 0.7149285 | 0.6468927 | 1 | C1QTNF3 |
| Biological Process | GO:0071640 | regulation of macrophage inflammatory protein 1 alpha production    | 1/2279 | 6/18866 | 0.5381716 | 0.7149285 | 0.6468927 | 1 | MEFV    |
| Biological Process | GO:0071651 | positive regulation of chemokine (C-C motif) ligand 5 production    | 1/2279 | 6/18866 | 0.5381716 | 0.7149285 | 0.6468927 | 1 | DEFB124 |
| Biological Process | GO:0071763 | nuclear membrane organization                                       | 1/2279 | 6/18866 | 0.5381716 | 0.7149285 | 0.6468927 | 1 | TOR1B   |
| Biological Process | GO:0071896 | protein localization to adherens junction                           | 1/2279 | 6/18866 | 0.5381716 | 0.7149285 | 0.6468927 | 1 | MPP7    |
| Biological Process | GO:0071926 | endocannabinoid signaling pathway                                   | 1/2279 | 6/18866 | 0.5381716 | 0.7149285 | 0.6468927 | 1 | MGLL    |
| Biological Process | GO:0072038 | mesenchymal stem cell maintenance involved in nephron morphogenesis | 1/2279 | 6/18866 | 0.5381716 | 0.7149285 | 0.6468927 | 1 | PAX2    |

|                    |            |                                                              |        |         |           |           |           |   |         |
|--------------------|------------|--------------------------------------------------------------|--------|---------|-----------|-----------|-----------|---|---------|
| Biological Process | GO:0072049 | comma-shaped body morphogenesis                              | 1/2279 | 6/18866 | 0.5381716 | 0.7149285 | 0.6468927 | 1 | PDGFRB  |
| Biological Process | GO:0072103 | glomerulus vasculature morphogenesis                         | 1/2279 | 6/18866 | 0.5381716 | 0.7149285 | 0.6468927 | 1 | PDGFRB  |
| Biological Process | GO:0072104 | glomerular capillary formation                               | 1/2279 | 6/18866 | 0.5381716 | 0.7149285 | 0.6468927 | 1 | PDGFRB  |
| Biological Process | GO:0072174 | metanephric tubule formation                                 | 1/2279 | 6/18866 | 0.5381716 | 0.7149285 | 0.6468927 | 1 | PAX2    |
| Biological Process | GO:0072284 | metanephric S-shaped body morphogenesis                      | 1/2279 | 6/18866 | 0.5381716 | 0.7149285 | 0.6468927 | 1 | PDGFRB  |
| Biological Process | GO:0072298 | regulation of metanephric glomerulus development             | 1/2279 | 6/18866 | 0.5381716 | 0.7149285 | 0.6468927 | 1 | PAX2    |
| Biological Process | GO:0072318 | clathrin coat disassembly                                    | 1/2279 | 6/18866 | 0.5381716 | 0.7149285 | 0.6468927 | 1 | SH3GL1  |
| Biological Process | GO:0072675 | osteoclast fusion                                            | 1/2279 | 6/18866 | 0.5381716 | 0.7149285 | 0.6468927 | 1 | SBNO2   |
| Biological Process | GO:0086045 | membrane depolarization during AV node cell action potential | 1/2279 | 6/18866 | 0.5381716 | 0.7149285 | 0.6468927 | 1 | CACNA1C |

|                    |            |                                                                             |        |         |           |           |           |   |         |
|--------------------|------------|-----------------------------------------------------------------------------|--------|---------|-----------|-----------|-----------|---|---------|
| Biological Process | GO:0086073 | bundle of His cell-Purkinje myocyte adhesion involved in cell communication | 1/2279 | 6/18866 | 0.5381716 | 0.7149285 | 0.6468927 | 1 | JUP     |
| Biological Process | GO:0090186 | regulation of pancreatic juice secretion                                    | 1/2279 | 6/18866 | 0.5381716 | 0.7149285 | 0.6468927 | 1 | NR1H2   |
| Biological Process | GO:0090230 | regulation of centromere complex assembly                                   | 1/2279 | 6/18866 | 0.5381716 | 0.7149285 | 0.6468927 | 1 | RB1     |
| Biological Process | GO:0097021 | lymphocyte migration into lymphoid organs                                   | 1/2279 | 6/18866 | 0.5381716 | 0.7149285 | 0.6468927 | 1 | FUT7    |
| Biological Process | GO:0097283 | keratinocyte apoptotic process                                              | 1/2279 | 6/18866 | 0.5381716 | 0.7149285 | 0.6468927 | 1 | GSN     |
| Biological Process | GO:0097327 | response to antineoplastic agent                                            | 1/2279 | 6/18866 | 0.5381716 | 0.7149285 | 0.6468927 | 1 | ABCC2   |
| Biological Process | GO:0097638 | L-arginine import across plasma membrane                                    | 1/2279 | 6/18866 | 0.5381716 | 0.7149285 | 0.6468927 | 1 | SLC7A1  |
| Biological Process | GO:0097680 | double-strand break repair via classical nonhomologous end joining          | 1/2279 | 6/18866 | 0.5381716 | 0.7149285 | 0.6468927 | 1 | UVRAG   |
| Biological Process | GO:0098838 | folate transmembrane transport                                              | 1/2279 | 6/18866 | 0.5381716 | 0.7149285 | 0.6468927 | 1 | SLC19A1 |

|                    |            |                                                                                                     |        |         |           |           |           |   |          |
|--------------------|------------|-----------------------------------------------------------------------------------------------------|--------|---------|-----------|-----------|-----------|---|----------|
| Biological Process | GO:0098880 | maintenance of postsynaptic specialization structure                                                | 1/2279 | 6/18866 | 0.5381716 | 0.7149285 | 0.6468927 | 1 | SYNGAP1  |
| Biological Process | GO:0098937 | anterograde dendritic transport                                                                     | 1/2279 | 6/18866 | 0.5381716 | 0.7149285 | 0.6468927 | 1 | KIF5C    |
| Biological Process | GO:0099041 | vesicle tethering to Golgi                                                                          | 1/2279 | 6/18866 | 0.5381716 | 0.7149285 | 0.6468927 | 1 | C17orf75 |
| Biological Process | GO:0106134 | positive regulation of cardiac muscle cell contraction                                              | 1/2279 | 6/18866 | 0.5381716 | 0.7149285 | 0.6468927 | 1 | NOS1AP   |
| Biological Process | GO:0110112 | regulation of lipid transporter activity                                                            | 1/2279 | 6/18866 | 0.5381716 | 0.7149285 | 0.6468927 | 1 | PPARG    |
| Biological Process | GO:1900825 | regulation of membrane depolarization during cardiac muscle cell action potential                   | 1/2279 | 6/18866 | 0.5381716 | 0.7149285 | 0.6468927 | 1 | GJA5     |
| Biological Process | GO:1901166 | neural crest cell migration involved in autonomic nervous system development                        | 1/2279 | 6/18866 | 0.5381716 | 0.7149285 | 0.6468927 | 1 | NRP2     |
| Biological Process | GO:1901374 | acetate ester transport                                                                             | 1/2279 | 6/18866 | 0.5381716 | 0.7149285 | 0.6468927 | 1 | SLC44A4  |
| Biological Process | GO:1901621 | negative regulation of smoothed signaling pathway involved in dorsal/ventral neural tube patterning | 1/2279 | 6/18866 | 0.5381716 | 0.7149285 | 0.6468927 | 1 | SUFU     |

|                    |            |                                                                                   |        |         |           |           |           |   |         |
|--------------------|------------|-----------------------------------------------------------------------------------|--------|---------|-----------|-----------|-----------|---|---------|
| Biological Process | GO:1901727 | positive regulation of histone deacetylase activity                               | 1/2279 | 6/18866 | 0.5381716 | 0.7149285 | 0.6468927 | 1 | C6orf89 |
| Biological Process | GO:1901897 | regulation of relaxation of cardiac muscle                                        | 1/2279 | 6/18866 | 0.5381716 | 0.7149285 | 0.6468927 | 1 | PDE4D   |
| Biological Process | GO:1901977 | negative regulation of cell cycle checkpoint                                      | 1/2279 | 6/18866 | 0.5381716 | 0.7149285 | 0.6468927 | 1 | CHEK2   |
| Biological Process | GO:1902035 | positive regulation of hematopoietic stem cell proliferation                      | 1/2279 | 6/18866 | 0.5381716 | 0.7149285 | 0.6468927 | 1 | KAT7    |
| Biological Process | GO:1902172 | regulation of keratinocyte apoptotic process                                      | 1/2279 | 6/18866 | 0.5381716 | 0.7149285 | 0.6468927 | 1 | GSN     |
| Biological Process | GO:1902218 | regulation of intrinsic apoptotic signaling pathway in response to osmotic stress | 1/2279 | 6/18866 | 0.5381716 | 0.7149285 | 0.6468927 | 1 | ARHGEF2 |
| Biological Process | GO:1902338 | negative regulation of apoptotic process involved in morphogenesis                | 1/2279 | 6/18866 | 0.5381716 | 0.7149285 | 0.6468927 | 1 | PAX2    |
| Biological Process | GO:1902747 | negative regulation of lens fiber cell differentiation                            | 1/2279 | 6/18866 | 0.5381716 | 0.7149285 | 0.6468927 | 1 | SPRED2  |
| Biological Process | GO:1903116 | positive regulation of actin filament-based movement                              | 1/2279 | 6/18866 | 0.5381716 | 0.7149285 | 0.6468927 | 1 | NOS1AP  |

|                    |            |                                                                          |        |         |           |           |           |   |        |
|--------------------|------------|--------------------------------------------------------------------------|--------|---------|-----------|-----------|-----------|---|--------|
| Biological Process | GO:1903333 | negative regulation of protein folding                                   | 1/2279 | 6/18866 | 0.5381716 | 0.7149285 | 0.6468927 | 1 | BAG5   |
| Biological Process | GO:1903348 | positive regulation of bicellular tight junction assembly                | 1/2279 | 6/18866 | 0.5381716 | 0.7149285 | 0.6468927 | 1 | NPHP4  |
| Biological Process | GO:1903352 | L-ornithine transmembrane transport                                      | 1/2279 | 6/18866 | 0.5381716 | 0.7149285 | 0.6468927 | 1 | SLC7A1 |
| Biological Process | GO:1904304 | regulation of gastrointestinal system smooth muscle contraction          | 1/2279 | 6/18866 | 0.5381716 | 0.7149285 | 0.6468927 | 1 | GHRL   |
| Biological Process | GO:1904306 | positive regulation of gastrointestinal system smooth muscle contraction | 1/2279 | 6/18866 | 0.5381716 | 0.7149285 | 0.6468927 | 1 | GHRL   |
| Biological Process | GO:1904428 | negative regulation of tubulin deacetylation                             | 1/2279 | 6/18866 | 0.5381716 | 0.7149285 | 0.6468927 | 1 | PRKAA1 |
| Biological Process | GO:1904627 | response to phorbol 13-acetate 12-myristate                              | 1/2279 | 6/18866 | 0.5381716 | 0.7149285 | 0.6468927 | 1 | SPHK2  |
| Biological Process | GO:1904628 | cellular response to phorbol 13-acetate 12-myristate                     | 1/2279 | 6/18866 | 0.5381716 | 0.7149285 | 0.6468927 | 1 | SPHK2  |
| Biological Process | GO:1904746 | negative regulation of apoptotic process involved in development         | 1/2279 | 6/18866 | 0.5381716 | 0.7149285 | 0.6468927 | 1 | PAX2   |



|                    |            |                                                                                           |        |         |           |           |           |   |        |
|--------------------|------------|-------------------------------------------------------------------------------------------|--------|---------|-----------|-----------|-----------|---|--------|
| Biological Process | GO:1904778 | positive regulation of protein localization to cell cortex                                | 1/2279 | 6/18866 | 0.5381716 | 0.7149285 | 0.6468927 | 1 | NUMA1  |
| Biological Process | GO:1904783 | positive regulation of NMDA glutamate receptor activity                                   | 1/2279 | 6/18866 | 0.5381716 | 0.7149285 | 0.6468927 | 1 | CCR2   |
| Biological Process | GO:1904959 | regulation of cytochrome-c oxidase activity                                               | 1/2279 | 6/18866 | 0.5381716 | 0.7149285 | 0.6468927 | 1 | SPHK2  |
| Biological Process | GO:1905462 | regulation of DNA duplex unwinding                                                        | 1/2279 | 6/18866 | 0.5381716 | 0.7149285 | 0.6468927 | 1 | MCM2   |
| Biological Process | GO:1990379 | lipid transport across blood-brain barrier                                                | 1/2279 | 6/18866 | 0.5381716 | 0.7149285 | 0.6468927 | 1 | MFSD2A |
| Biological Process | GO:1990668 | vesicle fusion with endoplasmic reticulum-Golgi intermediate compartment (ERGIC) membrane | 1/2279 | 6/18866 | 0.5381716 | 0.7149285 | 0.6468927 | 1 | CALR   |
| Biological Process | GO:2000051 | negative regulation of non-canonical Wnt signaling pathway                                | 1/2279 | 6/18866 | 0.5381716 | 0.7149285 | 0.6468927 | 1 | RNF213 |
| Biological Process | GO:2000138 | positive regulation of cell proliferation involved in heart morphogenesis                 | 1/2279 | 6/18866 | 0.5381716 | 0.7149285 | 0.6468927 | 1 | RBPJ   |
| Biological Process | GO:2000143 | negative regulation of DNA-templated transcription, initiation                            | 1/2279 | 6/18866 | 0.5381716 | 0.7149285 | 0.6468927 | 1 | MORC1  |

|                    |            |                                                                     |        |         |           |           |           |   |         |
|--------------------|------------|---------------------------------------------------------------------|--------|---------|-----------|-----------|-----------|---|---------|
| Biological Process | GO:2000328 | regulation of T-helper 17 cell lineage commitment                   | 1/2279 | 6/18866 | 0.5381716 | 0.7149285 | 0.6468927 | 1 | LOXL3   |
| Biological Process | GO:2000371 | regulation of DNA topoisomerase (ATP-hydrolyzing) activity          | 1/2279 | 6/18866 | 0.5381716 | 0.7149285 | 0.6468927 | 1 | UHRF1   |
| Biological Process | GO:2000373 | positive regulation of DNA topoisomerase (ATP-hydrolyzing) activity | 1/2279 | 6/18866 | 0.5381716 | 0.7149285 | 0.6468927 | 1 | UHRF1   |
| Biological Process | GO:2000416 | regulation of eosinophil migration                                  | 1/2279 | 6/18866 | 0.5381716 | 0.7149285 | 0.6468927 | 1 | DAPK2   |
| Biological Process | GO:2000481 | positive regulation of cAMP-dependent protein kinase activity       | 1/2279 | 6/18866 | 0.5381716 | 0.7149285 | 0.6468927 | 1 | RAPGEF2 |
| Biological Process | GO:2000503 | positive regulation of natural killer cell chemotaxis               | 1/2279 | 6/18866 | 0.5381716 | 0.7149285 | 0.6468927 | 1 | CCL5    |
| Biological Process | GO:2000542 | negative regulation of gastrulation                                 | 1/2279 | 6/18866 | 0.5381716 | 0.7149285 | 0.6468927 | 1 | COL5A1  |
| Biological Process | GO:2000618 | regulation of histone H4-K16 acetylation                            | 1/2279 | 6/18866 | 0.5381716 | 0.7149285 | 0.6468927 | 1 | PIH1D1  |
| Biological Process | GO:2000630 | positive regulation of miRNA metabolic process                      | 1/2279 | 6/18866 | 0.5381716 | 0.7149285 | 0.6468927 | 1 | RELA    |

|                    |            |                                                                                                                           |         |           |           |           |           |    |                                                                                                  |
|--------------------|------------|---------------------------------------------------------------------------------------------------------------------------|---------|-----------|-----------|-----------|-----------|----|--------------------------------------------------------------------------------------------------|
| Biological Process | GO:2000675 | negative regulation of type B pancreatic cell apoptotic process                                                           | 1/2279  | 6/18866   | 0.5381716 | 0.7149285 | 0.6468927 | 1  | TCF7L2                                                                                           |
| Biological Process | GO:2000722 | regulation of cardiac vascular smooth muscle cell differentiation                                                         | 1/2279  | 6/18866   | 0.5381716 | 0.7149285 | 0.6468927 | 1  | MIR145                                                                                           |
| Biological Process | GO:2000855 | regulation of mineralocorticoid secretion                                                                                 | 1/2279  | 6/18866   | 0.5381716 | 0.7149285 | 0.6468927 | 1  | AGTR1                                                                                            |
| Biological Process | GO:2000858 | regulation of aldosterone secretion                                                                                       | 1/2279  | 6/18866   | 0.5381716 | 0.7149285 | 0.6468927 | 1  | AGTR1                                                                                            |
| Biological Process | GO:2001188 | regulation of T cell activation via T cell receptor contact with antigen bound to MHC molecule on antigen presenting cell | 1/2279  | 6/18866   | 0.5381716 | 0.7149285 | 0.6468927 | 1  | HLA-DMB                                                                                          |
| Biological Process | GO:2001268 | negative regulation of cysteine-type endopeptidase activity involved in apoptotic signaling pathway                       | 1/2279  | 6/18866   | 0.5381716 | 0.7149285 | 0.6468927 | 1  | PIH1D1                                                                                           |
| Biological Process | GO:0001736 | establishment of planar polarity                                                                                          | 15/2279 | 124/18866 | 0.5390421 | 0.7154068 | 0.6473255 | 15 | AP2A1/VANGL1/PRICKLE2/WNT11/SMURF1/PFN1/PSMF1/WDR1/ARRB2/DAAM1/ASTN2/PSMB7/ANKRD6/PSMD13/CPLANE1 |
| Biological Process | GO:0007164 | establishment of tissue polarity                                                                                          | 15/2279 | 124/18866 | 0.5390421 | 0.7154068 | 0.6473255 | 15 | AP2A1/VANGL1/PRICKLE2/WNT11/SMURF1/PFN1/PSMF1/WDR1/ARRB2/DAAM1/ASTN2/PSMB7/ANKRD6/PSMD13/CPLANE1 |
| Biological Process | GO:0061982 | meiosis I cell cycle process                                                                                              | 15/2279 | 124/18866 | 0.5390421 | 0.7154068 | 0.6473255 | 15 | MOV10L1/BRCA2/EME1/MEIOB/CDC25A/RNF212/CCNA1/RAD21L1/DMC1/ERCC1/SLX4/TEX12/KLHDC3/PSMD13/TERB2   |

|                    |            |                                                    |        |          |           |           |           |   |                                   |
|--------------------|------------|----------------------------------------------------|--------|----------|-----------|-----------|-----------|---|-----------------------------------|
| Biological Process | GO:0009072 | aromatic amino acid family metabolic process       | 5/2279 | 40/18866 | 0.5394353 | 0.7154068 | 0.6473255 | 5 | HAL/HGD/FAH/MTHFD1/HNMT           |
| Biological Process | GO:0016572 | histone phosphorylation                            | 5/2279 | 40/18866 | 0.5394353 | 0.7154068 | 0.6473255 | 5 | BAZ1B/PRKCA/RPS6KA4/PRKCB/PRKAA1  |
| Biological Process | GO:0032467 | positive regulation of cytokinesis                 | 5/2279 | 40/18866 | 0.5394353 | 0.7154068 | 0.6473255 | 5 | CUL3/SVIL/CSPP1/PRKCE/CDC14A      |
| Biological Process | GO:0035735 | intraciliary transport involved in cilium assembly | 5/2279 | 40/18866 | 0.5394353 | 0.7154068 | 0.6473255 | 5 | TNPO1/CLUAP1/IFT140/TTC21B/KIFAP3 |
| Biological Process | GO:0042307 | positive regulation of protein import into nucleus | 5/2279 | 40/18866 | 0.5394353 | 0.7154068 | 0.6473255 | 5 | PIK3R1/SMAD3/JUP/TGFB1/CDH1       |
| Biological Process | GO:0043902 | positive regulation of multi-organism process      | 5/2279 | 40/18866 | 0.5394353 | 0.7154068 | 0.6473255 | 5 | HDAC4/AGO2/LHFPL2/PLCB1/INHBA     |
| Biological Process | GO:0045746 | negative regulation of Notch signaling pathway     | 5/2279 | 40/18866 | 0.5394353 | 0.7154068 | 0.6473255 | 5 | WWP2/ARRB1/EGFL7/DLL1/DLK1        |
| Biological Process | GO:0050892 | intestinal absorption                              | 5/2279 | 40/18866 | 0.5394353 | 0.7154068 | 0.6473255 | 5 | SLC2A5/TJP2/VDR/KCNQ1/EZR         |
| Biological Process | GO:0140353 | lipid export from cell                             | 5/2279 | 40/18866 | 0.5394353 | 0.7154068 | 0.6473255 | 5 | MYB/MAP2K6/GHRL/AGTR1/INHBA       |

|                    |            |                                                                                   |         |           |           |           |           |    |                                                                                                                                                                                                  |
|--------------------|------------|-----------------------------------------------------------------------------------|---------|-----------|-----------|-----------|-----------|----|--------------------------------------------------------------------------------------------------------------------------------------------------------------------------------------------------|
| Biological Process | GO:0006626 | protein targeting to mitochondrion                                                | 12/2279 | 99/18866  | 0.5411385 | 0.7173653 | 0.6490976 | 12 | PAM16/FBXO7/MIPEP/AIP/USP36/ABLIM3/UBE2J2/FIS1/TIMM44/SREBF1/PRKAA1/PRKN                                                                                                                         |
| Biological Process | GO:0010717 | regulation of epithelial to mesenchymal transition                                | 12/2279 | 99/18866  | 0.5411385 | 0.7173653 | 0.6490976 | 12 | SPRED2/SMAD3/LDLRAD4/TGFBR2/TCF7L2/SMAD7/TGFB1/TGFB11/WWTR1/ENG/NOTCH1/GCNT2                                                                                                                     |
| Biological Process | GO:0019886 | antigen processing and presentation of exogenous peptide antigen via MHC class II | 12/2279 | 99/18866  | 0.5411385 | 0.7173653 | 0.6490976 | 12 | HLA-DMB/DCTN1/AP2A1/DNM2/DYNC1H1/CTSD/AP1B1/DCTN2/SEC13/SEC24C/KIFAP3/SEC31A                                                                                                                     |
| Biological Process | GO:0010951 | negative regulation of endopeptidase activity                                     | 31/2279 | 258/18866 | 0.5416834 | 0.7179874 | 0.6496605 | 31 | SLPI/CSTA/TIMP2/SORL1/SERPINA1/SPOCK2/RPS6KA1/APLP2/SERPINB11/ARRB1/SPINT2/TNF/MICAL1/SERPINB2/BIN1/THBS1/APP/UBE2O/MIR24-2/PAX2/AQP1/POR/DNAJB6/PSMF1/CRIM1/NOL3/ARRB2/PIH1D1/LTF/COL28A1/PCID2 |
| Biological Process | GO:0030520 | intracellular estrogen receptor signaling pathway                                 | 7/2279  | 57/18866  | 0.5419724 | 0.7182703 | 0.6499165 | 7  | RUNX1/LBH/PADI2/ZNF366/AXIN1/KMT2D/NCOA4                                                                                                                                                         |
| Biological Process | GO:0009266 | response to temperature stimulus                                                  | 28/2279 | 233/18866 | 0.5421935 | 0.7184631 | 0.6500909 | 28 | TRPM2/RPTOR/ZNF516/PPARG/RAE1/DRGX/EIF2B5/ABCC2/THBS1/NF1/NUP93/TGFB11/WDR47/DNAJB6/SEC13/CREBBP/ARRB2/NTRK1/TRPM3/CPB2/GLRX2/FOXO1/TRPV2/CASQ1/BAG5/SST/ACADVL/PRKAA1                           |
| Biological Process | GO:0032392 | DNA geometric change                                                              | 14/2279 | 116/18866 | 0.5441829 | 0.7207977 | 0.6522034 | 14 | BLM/RTEL1/MCM5/WRNIP1/RECQL5/IGHMBP2/MCM2/SMARCAL1/CHD9/CHD8/RUVBL1/XPA/ERCC2/FBH1                                                                                                               |
| Biological Process | GO:0046916 | cellular transition metal ion homeostasis                                         | 14/2279 | 116/18866 | 0.5441829 | 0.7207977 | 0.6522034 | 14 | S100A8/LCN2/LCK/SLC11A1/COX19/TTC7A/SLC11A2/APP/ATOX1/SLC39A13/LTF/AP3D1/ATP7B/NCOA4                                                                                                             |
| Biological Process | GO:0060964 | regulation of gene silencing by miRNA                                             | 14/2279 | 116/18866 | 0.5441829 | 0.7207977 | 0.6522034 | 14 | PPARG/NCOR2/RAE1/TNF/POLR2F/AGO1/RIPK1/LIMD1/AGO2/TGFB1/NUP93/SEC13/EIF4G1/H3C1                                                                                                                  |

|                    |            |                                                       |         |           |           |           |           |    |                                                                                                                                                                                           |
|--------------------|------------|-------------------------------------------------------|---------|-----------|-----------|-----------|-----------|----|-------------------------------------------------------------------------------------------------------------------------------------------------------------------------------------------|
| Biological Process | GO:0006635 | fatty acid beta-oxidation                             | 9/2279  | 74/18866  | 0.5446128 | 0.7211661 | 0.6525367 | 9  | MFSD2A/AMACR/ACOXL/ACADM/ACACB/ACOX2/ACAT1/CPT1A/ACADVL                                                                                                                                   |
| Biological Process | GO:0072395 | signal transduction involved in cell cycle checkpoint | 9/2279  | 74/18866  | 0.5446128 | 0.7211661 | 0.6525367 | 9  | FZR1/TFDP1/E2F7/PCBP4/ZNF385A/ARID3A/CHEK2/ABRAXAS1/BABAM2                                                                                                                                |
| Biological Process | GO:0042475 | odontogenesis of dentin-containing tooth              | 11/2279 | 91/18866  | 0.547217  | 0.7243116 | 0.6553828 | 11 | BSG/CSF3R/SLC24A4/ANKRD11/NFIC/HDAC1/PERP/RUNX2/FOXO1/FAM20C/NECTIN1                                                                                                                      |
| Biological Process | GO:0051899 | membrane depolarization                               | 11/2279 | 91/18866  | 0.547217  | 0.7243116 | 0.6553828 | 11 | PRKCZ/CACNA1C/YWHAH/SLC8A1/GJA5/HSH2D/SMAD7/SCN1A/BCL2/CACNA1B/ANK2                                                                                                                       |
| Biological Process | GO:0060021 | roof of mouth development                             | 11/2279 | 91/18866  | 0.547217  | 0.7243116 | 0.6553828 | 11 | ARID5B/SKI/LOXL3/EPHB3/TGFBR2/WNT11/PRDM16/MEF2C/ASPH/INHBA/CPLANE1                                                                                                                       |
| Biological Process | GO:0006606 | protein import into nucleus                           | 18/2279 | 150/18866 | 0.5497109 | 0.7271378 | 0.6579401 | 18 | ANGPT1/PIK3R1/SMAD3/TNPO1/MBTPS1/E2F3/SUFU/IPO13/FAM53B/JUP/TGFB1/NF1/NUP93/ARNTL/CDH1/SNUPN/CABP1/TSC2                                                                                   |
| Biological Process | GO:0016525 | negative regulation of angiogenesis                   | 23/2279 | 192/18866 | 0.550572  | 0.7271378 | 0.6579401 | 23 | PPARG/MIR143/MIR145/ITGB1BP1/CCR2/COL4A2/MIR199A1/TNF/AGO1/SEMA4A/THBS1/MIR24-2/EPN2/NF1/GHRL/VASH1/MIR138-2/MIR199A2/NOTCH1/GPR4/HHEX/PDE3B/CX3CR1                                       |
| Biological Process | GO:0021953 | central nervous system neuron differentiation         | 23/2279 | 192/18866 | 0.550572  | 0.7271378 | 0.6579401 | 23 | NRP2/CSNK1D/PHOX2A/SUFU/ZEB2/CSF1R/EPHB3/DISC1/ZMIZ1/PAX7/RAPGEF2/CSNK1E/ZNF335/TTC21B/CDH11/NDEL1/LMO4/SPTBN4/NPY/INHBA/TLL1/TSKU/UNC5D                                                  |
| Biological Process | GO:0021537 | telencephalon development                             | 31/2279 | 259/18866 | 0.5508478 | 0.7271378 | 0.6579401 | 31 | MFSD2A/NDE1/SKI/SLC8A1/BTBD3/ZEB2/CSF1R/EIF2B5/EPHB3/RTN4/DISC1/TRAPPC9/HDAC1/ZMIZ1/AQP1/RARA/NF1/KIRREL3/TACC3/SLC1A2/WDR47/NUMB/NCOA1/PLCB1/CORO1C/SLC2A1/SECISBP2/NDEL1/NPY/INHBA/TSKU |

|                    |            |                                                                           |         |           |           |           |           |    |                                                                                                                                                                                                                                                                                          |
|--------------------|------------|---------------------------------------------------------------------------|---------|-----------|-----------|-----------|-----------|----|------------------------------------------------------------------------------------------------------------------------------------------------------------------------------------------------------------------------------------------------------------------------------------------|
| Biological Process | GO:0006402 | mRNA catabolic process                                                    | 45/2279 | 376/18866 | 0.5509336 | 0.7271378 | 0.6579401 | 45 | RNH1/PRR5L/LSM1/EXOSC2/SLC11A1/ERN1/TNRC6B/PABPC4/TNPO1/SLFN14/PRKCA/AGO1/LARP1/CSDE1/ZC3H12D/PKP1/PCBP4/SAMD4A/SMG7/CTIF/AGO2/EDC3/LSM7/CPEB3/IGF2BP3/SMG6/PSMF1/PPP2R1A/FTO/NBAS/YWHAZ/PSMB7/ZHX2/PAIP1/DIS3L2/TNFSF13/SECISBP2/RPL23A/SYNERIP/EIF4G1/PSMD13/PCID2/TBRG4/TENT5C/TENT5A |
| Biological Process | GO:0002673 | regulation of acute inflammatory response                                 | 6/2279  | 49/18866  | 0.551124  | 0.7271378 | 0.6579401 | 6  | FUT7/PPARG/NLRP3/TNF/F12/DNASE1L3                                                                                                                                                                                                                                                        |
| Biological Process | GO:0007129 | homologous chromosome pairing at meiosis                                  | 6/2279  | 49/18866  | 0.551124  | 0.7271378 | 0.6579401 | 6  | MEIOB/RNF212/RAD21L1/DMC1/TEX12/TERB2                                                                                                                                                                                                                                                    |
| Biological Process | GO:0010171 | body morphogenesis                                                        | 6/2279  | 49/18866  | 0.551124  | 0.7271378 | 0.6579401 | 6  | ARID5B/CRISPLD2/SKI/ANKRD11/ASPH/SSBP3                                                                                                                                                                                                                                                   |
| Biological Process | GO:0030850 | prostate gland development                                                | 6/2279  | 49/18866  | 0.551124  | 0.7271378 | 0.6579401 | 6  | RXRA/RARA/RARG/NOTCH1/UBE3A/CRIP1                                                                                                                                                                                                                                                        |
| Biological Process | GO:0034260 | negative regulation of GTPase activity                                    | 6/2279  | 49/18866  | 0.551124  | 0.7271378 | 0.6579401 | 6  | RHOH/ARRB1/PTPRN2/SH3BP4/ARRB2/TMED2                                                                                                                                                                                                                                                     |
| Biological Process | GO:0042059 | negative regulation of epidermal growth factor receptor signaling pathway | 6/2279  | 49/18866  | 0.551124  | 0.7271378 | 0.6579401 | 6  | TGFA/ARHGEF7/EPS15L1/PTPRJ/DUSP3/EPS15                                                                                                                                                                                                                                                   |
| Biological Process | GO:0042149 | cellular response to glucose starvation                                   | 6/2279  | 49/18866  | 0.551124  | 0.7271378 | 0.6579401 | 6  | PRKAG2/ATG14/NFE2L2/BCL2/SLC2A1/PRKAA1                                                                                                                                                                                                                                                   |
| Biological Process | GO:0072348 | sulfur compound transport                                                 | 6/2279  | 49/18866  | 0.551124  | 0.7271378 | 0.6579401 | 6  | ABCC1/SLC44A4/LRRC8C/SLC13A4/SLC26A1/SLC33A1                                                                                                                                                                                                                                             |

|                    |            |                                                        |        |          |           |           |           |   |                             |
|--------------------|------------|--------------------------------------------------------|--------|----------|-----------|-----------|-----------|---|-----------------------------|
| Biological Process | GO:0006506 | GPI anchor biosynthetic process                        | 4/2279 | 32/18866 | 0.5512655 | 0.7271378 | 0.6579401 | 4 | PIGL/PIGU/PIGN/PIGQ         |
| Biological Process | GO:0009164 | nucleoside catabolic process                           | 4/2279 | 32/18866 | 0.5512655 | 0.7271378 | 0.6579401 | 4 | CDA/DPYS/UPB1/PNP           |
| Biological Process | GO:0019359 | nicotinamide nucleotide biosynthetic process           | 4/2279 | 32/18866 | 0.5512655 | 0.7271378 | 0.6579401 | 4 | NADK/NMNAT3/PARP10/PARP9    |
| Biological Process | GO:0019363 | pyridine nucleotide biosynthetic process               | 4/2279 | 32/18866 | 0.5512655 | 0.7271378 | 0.6579401 | 4 | NADK/NMNAT3/PARP10/PARP9    |
| Biological Process | GO:0035767 | endothelial cell chemotaxis                            | 4/2279 | 32/18866 | 0.5512655 | 0.7271378 | 0.6579401 | 4 | THBS1/PLEKHG5/FGFR1/NOTCH1  |
| Biological Process | GO:0042744 | hydrogen peroxide catabolic process                    | 4/2279 | 32/18866 | 0.5512655 | 0.7271378 | 0.6579401 | 4 | MPO/LPO/HBB/CAT             |
| Biological Process | GO:0048730 | epidermis morphogenesis                                | 4/2279 | 32/18866 | 0.5512655 | 0.7271378 | 0.6579401 | 4 | KRT17/BCL2/NOTCH1/TGM3      |
| Biological Process | GO:0048741 | skeletal muscle fiber development                      | 4/2279 | 32/18866 | 0.5512655 | 0.7271378 | 0.6579401 | 4 | HDAC4/SKI/BCL2/MYORG        |
| Biological Process | GO:0048841 | regulation of axon extension involved in axon guidance | 4/2279 | 32/18866 | 0.5512655 | 0.7271378 | 0.6579401 | 4 | SEMA6B/SEMA4A/SEMA4B/SEMA4D |



|                    |            |                                                                                          |         |           |           |           |           |    |                                                                                                                                                                                   |
|--------------------|------------|------------------------------------------------------------------------------------------|---------|-----------|-----------|-----------|-----------|----|-----------------------------------------------------------------------------------------------------------------------------------------------------------------------------------|
| Biological Process | GO:0051968 | positive regulation of synaptic transmission, glutamatergic                              | 4/2279  | 32/18866  | 0.5512655 | 0.7271378 | 0.6579401 | 4  | CCR2/NRXN1/NTRK1/SHANK2                                                                                                                                                           |
| Biological Process | GO:1902235 | regulation of endoplasmic reticulum stress-induced intrinsic apoptotic signaling pathway | 4/2279  | 32/18866  | 0.5512655 | 0.7271378 | 0.6579401 | 4  | NCK2/BCL2L1/GRINA/PRKN                                                                                                                                                            |
| Biological Process | GO:1903955 | positive regulation of protein targeting to mitochondrion                                | 4/2279  | 32/18866  | 0.5512655 | 0.7271378 | 0.6579401 | 4  | USP36/ABLIM3/UBE2J2/PRKAA1                                                                                                                                                        |
| Biological Process | GO:1903578 | regulation of ATP metabolic process                                                      | 15/2279 | 125/18866 | 0.552183  | 0.7281923 | 0.6588942 | 15 | HDAC4/PRKAG2/ENO1/PFKFB4/RAE1/CBFA2T3/APP/PGAM1/SPHK2/NUP93/SEC13/ESRRB/DNM1L/PFKFB3/PRKAA1                                                                                       |
| Biological Process | GO:0009145 | purine nucleoside triphosphate biosynthetic process                                      | 8/2279  | 66/18866  | 0.5522949 | 0.7281923 | 0.6588942 | 8  | PRKAG2/ENO1/VPS9D1/SPHK2/TGFB1/PKM/IMPDH1/ATP5PD                                                                                                                                  |
| Biological Process | GO:1901016 | regulation of potassium ion transmembrane transporter activity                           | 8/2279  | 66/18866  | 0.5522949 | 0.7281923 | 0.6588942 | 8  | KCNE1/CASQ2/WWP2/DNM2/NOS1AP/CAB39/NEDD4/ANK2                                                                                                                                     |
| Biological Process | GO:0007031 | peroxisome organization                                                                  | 10/2279 | 83/18866  | 0.5539492 | 0.7287175 | 0.6593695 | 10 | AMACR/AGXT/CAT/PEX26/ACOX2/FIS1/DNM1L/HMGCL/PEX11B/UBE2D2                                                                                                                         |
| Biological Process | GO:0002833 | positive regulation of response to biotic stimulus                                       | 30/2279 | 251/18866 | 0.5542403 | 0.7287175 | 0.6593695 | 30 | NLRC4/AIM2/CLEC4C/PRKCA/CCL5/FPR2/MNDA/CD226/HLA-F/MUC12/SCIMP/LY86/FCN1/TRIM5/MUC20/BCL10/PSMF1/GRN/NLRC5/CREBBP/IL18RAP/PSMB7/CADM1/RELA/FBXW11/HEXIM1/PARP9/FADD/PSMD13/STING1 |
| Biological Process | GO:0046425 | regulation of receptor signaling pathway via JAK-STAT                                    | 17/2279 | 142/18866 | 0.5545355 | 0.7287175 | 0.6593695 | 17 | IL10/PIGU/TNF/CCL5/CSF1R/TNFRSF1A/PTPRC/IL6R/PPP2R1A/NOTCH1/GGNBP2/F2R/BCL3/INPP5F/CRLF1/PARP9/LIF                                                                                |

|                    |            |                                                    |         |           |           |           |           |    |                                                                                                                                     |
|--------------------|------------|----------------------------------------------------|---------|-----------|-----------|-----------|-----------|----|-------------------------------------------------------------------------------------------------------------------------------------|
| Biological Process | GO:0046546 | development of primary male sexual characteristics | 17/2279 | 142/18866 | 0.5545355 | 0.7287175 | 0.6593695 | 17 | ARID5B/CSDE1/FANCA/RARA/SF1/NCOA1/LHFPL2/NTRK1/HOXA9/RAD21L1/BCL2/PDGFRB/ERCC1/BCL2L1/HMGCS1/NCOA4/INHBA                            |
| Biological Process | GO:0007416 | synapse assembly                                   | 22/2279 | 184/18866 | 0.5546831 | 0.7287175 | 0.6593695 | 22 | SPOCK2/COLQ/EPHB3/SEMA4A/APP/FARP1/SEMA4D/NRXN1/KIRREL3/GHRL/NRXN2/NTRK1/CDH1/DNM3/MEF2C/SHANK2/SDK2/SLIT1/CUX2/EIF4G1/DBNL/NECTIN1 |
| Biological Process | GO:0006828 | manganese ion transport                            | 2/2279  | 15/18866  | 0.5562981 | 0.7287175 | 0.6593695 | 2  | SLC11A1/SLC11A2                                                                                                                     |
| Biological Process | GO:0009404 | toxin metabolic process                            | 2/2279  | 15/18866  | 0.5562981 | 0.7287175 | 0.6593695 | 2  | DDC/NFE2L2                                                                                                                          |
| Biological Process | GO:0009415 | response to water                                  | 2/2279  | 15/18866  | 0.5562981 | 0.7287175 | 0.6593695 | 2  | CD9/NTRK1                                                                                                                           |
| Biological Process | GO:0015671 | oxygen transport                                   | 2/2279  | 15/18866  | 0.5562981 | 0.7287175 | 0.6593695 | 2  | HBB/MB                                                                                                                              |
| Biological Process | GO:0018158 | protein oxidation                                  | 2/2279  | 15/18866  | 0.5562981 | 0.7287175 | 0.6593695 | 2  | LOXL3/LOXL4                                                                                                                         |
| Biological Process | GO:0030238 | male sex determination                             | 2/2279  | 15/18866  | 0.5562981 | 0.7287175 | 0.6593695 | 2  | SF1/INSRR                                                                                                                           |
| Biological Process | GO:0031054 | pre-miRNA processing                               | 2/2279  | 15/18866  | 0.5562981 | 0.7287175 | 0.6593695 | 2  | AGO1/AGO2                                                                                                                           |

|                    |            |                                                                           |        |          |           |           |           |   |                 |
|--------------------|------------|---------------------------------------------------------------------------|--------|----------|-----------|-----------|-----------|---|-----------------|
| Biological Process | GO:0032252 | secretory granule localization                                            | 2/2279 | 15/18866 | 0.5562981 | 0.7287175 | 0.6593695 | 2 | MYO5A/KIF1B     |
| Biological Process | GO:0032328 | alanine transport                                                         | 2/2279 | 15/18866 | 0.5562981 | 0.7287175 | 0.6593695 | 2 | SLC36A3/SLC7A8  |
| Biological Process | GO:0032645 | regulation of granulocyte macrophage colony-stimulating factor production | 2/2279 | 15/18866 | 0.5562981 | 0.7287175 | 0.6593695 | 2 | CD84/TLR9       |
| Biological Process | GO:0033623 | regulation of integrin activation                                         | 2/2279 | 15/18866 | 0.5562981 | 0.7287175 | 0.6593695 | 2 | RAP1B/JAM3      |
| Biological Process | GO:0034134 | toll-like receptor 2 signaling pathway                                    | 2/2279 | 15/18866 | 0.5562981 | 0.7287175 | 0.6593695 | 2 | PIK3AP1/TNFAIP3 |
| Biological Process | GO:0034638 | phosphatidylcholine catabolic process                                     | 2/2279 | 15/18866 | 0.5562981 | 0.7287175 | 0.6593695 | 2 | PLA2G15/LIPC    |
| Biological Process | GO:0035745 | T-helper 2 cell cytokine production                                       | 2/2279 | 15/18866 | 0.5562981 | 0.7287175 | 0.6593695 | 2 | PRKCZ/NLRP3     |
| Biological Process | GO:0038065 | collagen-activated signaling pathway                                      | 2/2279 | 15/18866 | 0.5562981 | 0.7287175 | 0.6593695 | 2 | COL4A2/UBASH3B  |
| Biological Process | GO:0042159 | lipoprotein catabolic process                                             | 2/2279 | 15/18866 | 0.5562981 | 0.7287175 | 0.6593695 | 2 | CTSD/LYPLA2     |

|                    |            |                                                 |        |          |           |           |           |   |               |
|--------------------|------------|-------------------------------------------------|--------|----------|-----------|-----------|-----------|---|---------------|
| Biological Process | GO:0042574 | retinal metabolic process                       | 2/2279 | 15/18866 | 0.5562981 | 0.7287175 | 0.6593695 | 2 | RDH10/ALDH1A2 |
| Biological Process | GO:0042754 | negative regulation of circadian rhythm         | 2/2279 | 15/18866 | 0.5562981 | 0.7287175 | 0.6593695 | 2 | GHRL/PER2     |
| Biological Process | GO:0042976 | activation of Janus kinase activity             | 2/2279 | 15/18866 | 0.5562981 | 0.7287175 | 0.6593695 | 2 | CCL5/IL6R     |
| Biological Process | GO:0043144 | snoRNA processing                               | 2/2279 | 15/18866 | 0.5562981 | 0.7287175 | 0.6593695 | 2 | EXOSC2/FBL    |
| Biological Process | GO:0043584 | nose development                                | 2/2279 | 15/18866 | 0.5562981 | 0.7287175 | 0.6593695 | 2 | SKI/RDH10     |
| Biological Process | GO:0045346 | regulation of MHC class II biosynthetic process | 2/2279 | 15/18866 | 0.5562981 | 0.7287175 | 0.6593695 | 2 | AZU1/IL10     |
| Biological Process | GO:0045820 | negative regulation of glycolytic process       | 2/2279 | 15/18866 | 0.5562981 | 0.7287175 | 0.6593695 | 2 | HDAC4/CBFA2T3 |
| Biological Process | GO:0046033 | AMP metabolic process                           | 2/2279 | 15/18866 | 0.5562981 | 0.7287175 | 0.6593695 | 2 | AMPD3/AK2     |
| Biological Process | GO:0046479 | glycosphingolipid catabolic process             | 2/2279 | 15/18866 | 0.5562981 | 0.7287175 | 0.6593695 | 2 | HEXB/GALC     |

|                    |            |                                                    |        |          |           |           |           |   |                |
|--------------------|------------|----------------------------------------------------|--------|----------|-----------|-----------|-----------|---|----------------|
| Biological Process | GO:0048484 | enteric nervous system development                 | 2/2279 | 15/18866 | 0.5562981 | 0.7287175 | 0.6593695 | 2 | PHOX2A/HLX     |
| Biological Process | GO:0050651 | dermatan sulfate proteoglycan biosynthetic process | 2/2279 | 15/18866 | 0.5562981 | 0.7287175 | 0.6593695 | 2 | CSGALNACT1/DSE |
| Biological Process | GO:0051299 | centrosome separation                              | 2/2279 | 15/18866 | 0.5562981 | 0.7287175 | 0.6593695 | 2 | NDE1/NDEL1     |
| Biological Process | GO:0060134 | prepulse inhibition                                | 2/2279 | 15/18866 | 0.5562981 | 0.7287175 | 0.6593695 | 2 | NRXN1/CHD8     |
| Biological Process | GO:0070207 | protein homotrimerization                          | 2/2279 | 15/18866 | 0.5562981 | 0.7287175 | 0.6593695 | 2 | SLC1A5/SLC1A2  |
| Biological Process | GO:0071025 | RNA surveillance                                   | 2/2279 | 15/18866 | 0.5562981 | 0.7287175 | 0.6593695 | 2 | EXOSC2/PCID2   |
| Biological Process | GO:0072044 | collecting duct development                        | 2/2279 | 15/18866 | 0.5562981 | 0.7287175 | 0.6593695 | 2 | PAX2/NOTCH1    |
| Biological Process | GO:0072075 | metanephric mesenchyme development                 | 2/2279 | 15/18866 | 0.5562981 | 0.7287175 | 0.6593695 | 2 | PAX2/PDGFRB    |
| Biological Process | GO:1900037 | regulation of cellular response to hypoxia         | 2/2279 | 15/18866 | 0.5562981 | 0.7287175 | 0.6593695 | 2 | ENO1/NOL3      |

|                    |            |                                                                  |         |           |           |           |           |    |                                                                                                                                                          |                   |
|--------------------|------------|------------------------------------------------------------------|---------|-----------|-----------|-----------|-----------|----|----------------------------------------------------------------------------------------------------------------------------------------------------------|-------------------|
| Biological Process | GO:1900225 | regulation of NLRP3 inflammasome complex assembly                | 2/2279  | 15/18866  | 0.5562981 | 0.7287175 | 0.6593695 | 2  |                                                                                                                                                          | MEFV/STMP1        |
| Biological Process | GO:1904464 | regulation of matrix metallopeptidase secretion                  | 2/2279  | 15/18866  | 0.5562981 | 0.7287175 | 0.6593695 | 2  |                                                                                                                                                          | MIR199A1/MIR199A2 |
| Biological Process | GO:1904874 | positive regulation of telomerase RNA localization to Cajal body | 2/2279  | 15/18866  | 0.5562981 | 0.7287175 | 0.6593695 | 2  |                                                                                                                                                          | RUVBL1/CCT6A      |
| Biological Process | GO:1904889 | regulation of excitatory synapse assembly                        | 2/2279  | 15/18866  | 0.5562981 | 0.7287175 | 0.6593695 | 2  |                                                                                                                                                          | SEMA4A/NRXN1      |
| Biological Process | GO:1905203 | regulation of connective tissue replacement                      | 2/2279  | 15/18866  | 0.5562981 | 0.7287175 | 0.6593695 | 2  |                                                                                                                                                          | MIR199A1/MIR199A2 |
| Biological Process | GO:1990773 | matrix metallopeptidase secretion                                | 2/2279  | 15/18866  | 0.5562981 | 0.7287175 | 0.6593695 | 2  |                                                                                                                                                          | MIR199A1/MIR199A2 |
| Biological Process | GO:2000345 | regulation of hepatocyte proliferation                           | 2/2279  | 15/18866  | 0.5562981 | 0.7287175 | 0.6593695 | 2  |                                                                                                                                                          | TNFAIP3/CPB2      |
| Biological Process | GO:2000846 | regulation of corticosteroid hormone secretion                   | 2/2279  | 15/18866  | 0.5562981 | 0.7287175 | 0.6593695 | 2  |                                                                                                                                                          | GHRL/AGTR1        |
| Biological Process | GO:0007623 | circadian rhythm                                                 | 26/2279 | 218/18866 | 0.5592427 | 0.7324738 | 0.6627683 | 26 | PPARG/CSNK1D/CREB1/KDM2A/PHLPP1/ZFH3/DDC/HDAC1/MTA1/GNA11/GHRL/CSNK1E/PPP1CB/ARNTL/PER2/NTRK1/PER1/RAI1/FBXL6/UBE3A/USP2/NCOA2/SREBF1/FBXW11/PT1A/PRKAA1 |                   |

|                    |            |                                                                                                 |         |           |           |           |           |    |                                                                                                                                                                                                                                                                                                                                              |
|--------------------|------------|-------------------------------------------------------------------------------------------------|---------|-----------|-----------|-----------|-----------|----|----------------------------------------------------------------------------------------------------------------------------------------------------------------------------------------------------------------------------------------------------------------------------------------------------------------------------------------------|
| Biological Process | GO:0006605 | protein targeting                                                                               | 53/2279 | 444/18866 | 0.5595647 | 0.7327945 | 0.6630585 | 53 | SORL1/KCNE1/KIF13B/VTI1A/ZDHHC18/AP4S1/ITGB1BP1/VPS13D/PAM16/ZDHHC14/AMACR/FBXO7/MIPEP/AIP/RABGEF1/RAB27A/USP36/ZDHHC2/CLU/ABLIM3/AKAP5/UBE2J2/ZDHHC7/SMURF1/AGXT/NUMA1/ZDHHC1/CAT/PRKCI/PEX26/PMM2/ITGB2/SORT1/ACOX2/YWHAZ/MICALL1/FIS1/TIMM44/NACAD/HMGCL/NEDD4/MYO1C/MIEF1/AP3D1/SREBF1/RPL23A/YWHAQ/NCOA4/PDZK1/UBE2D2/PRKAA1/SPCS1/PRKN |
| Biological Process | GO:0045995 | regulation of embryonic development                                                             | 16/2279 | 134/18866 | 0.5596809 | 0.7328457 | 0.6631048 | 16 | IL10/RBM19/SUFU/DLL1/MBP/FGFR1/IL1RN/STK3/PLCB1/NFE2L2/NOTCH1/COL5A1/TRIP12/MYADM/NODAL/OTX2                                                                                                                                                                                                                                                 |
| Biological Process | GO:0071248 | cellular response to metal ion                                                                  | 23/2279 | 193/18866 | 0.5611236 | 0.7342766 | 0.6643996 | 23 | TRPM2/CPNE6/CALR/GSN/CPNE2/CREB1/ITPKB/SLFN14/GPLD1/CPNE5/APP/CPNE1/MTF1/CRHBP/AQP1/NFE2L2/CDH1/ADD1/MEF2C/SYT17/SLC41A1/PRKAA1/PRKN                                                                                                                                                                                                         |
| Biological Process | GO:0031294 | lymphocyte costimulation                                                                        | 7/2279  | 58/18866  | 0.5611756 | 0.7342766 | 0.6643996 | 7  | LCK/PIK3R1/GRAP2/TNFSF13B/PTPN6/CD320/CSK                                                                                                                                                                                                                                                                                                    |
| Biological Process | GO:0046128 | purine ribonucleoside metabolic process                                                         | 7/2279  | 58/18866  | 0.5611756 | 0.7342766 | 0.6643996 | 7  | AMPD3/TJP2/PNP/GUK1/GMPR2/IMPDH1/ACP3                                                                                                                                                                                                                                                                                                        |
| Biological Process | GO:0051055 | negative regulation of lipid biosynthetic process                                               | 7/2279  | 58/18866  | 0.5611756 | 0.7342766 | 0.6643996 | 7  | GFI1/LPCAT1/ORMDL3/PDGFB/WBTC1/ACADVL/PRKAA1                                                                                                                                                                                                                                                                                                 |
| Biological Process | GO:0002479 | antigen processing and presentation of exogenous peptide antigen via MHC class I, TAP-dependent | 9/2279  | 75/18866  | 0.5614941 | 0.7342766 | 0.6643996 | 9  | CALR/NCF4/HLA-C/HLA-F/NCF2/ITGB5/PSMF1/PSMB7/PSMD13                                                                                                                                                                                                                                                                                          |
| Biological Process | GO:0009064 | glutamine family amino acid metabolic process                                                   | 9/2279  | 75/18866  | 0.5614941 | 0.7342766 | 0.6643996 | 9  | HAL/GGT1/MTHFS/ALDH4A1/FAH/SLC7A7/ART4/GFPT2/DGLUCY                                                                                                                                                                                                                                                                                          |
| Biological Process | GO:0015909 | long-chain fatty acid transport                                                                 | 9/2279  | 75/18866  | 0.5614941 | 0.7342766 | 0.6643996 | 9  | PRKAG2/PPARG/ACSL1/MFSD2A/THBS1/ACACB/ACACA/SLC2A1/CPT1A                                                                                                                                                                                                                                                                                     |

|                    |            |                                                           |         |           |           |           |           |    |                                                                                                                                                                                                           |
|--------------------|------------|-----------------------------------------------------------|---------|-----------|-----------|-----------|-----------|----|-----------------------------------------------------------------------------------------------------------------------------------------------------------------------------------------------------------|
| Biological Process | GO:0031100 | animal organ regeneration                                 | 9/2279  | 75/18866  | 0.5614941 | 0.7342766 | 0.6643996 | 9  | IL10/PPARG/TGFBR2/PKM/NOTCH1/CPB2/CEBPB/PTPRU/LPIN1                                                                                                                                                       |
| Biological Process | GO:0035019 | somatic stem cell population maintenance                  | 9/2279  | 75/18866  | 0.5614941 | 0.7342766 | 0.6643996 | 9  | FOXP1/MIR145/SKI/POLR2F/LBH/RBPJ/PAX2/PRDM16/ZHX2                                                                                                                                                         |
| Biological Process | GO:0050871 | positive regulation of B cell activation                  | 18/2279 | 151/18866 | 0.5616239 | 0.7342766 | 0.6643996 | 18 | INPP5D/NFATC2/TNFSF13B/TLR9/IGHV6-1/TGFB1/PTPRC/CD320/NOD2/BCL2/TP53BP1/MEF2C/TNFSF13/PELI1/PCID2/PAXIP1/VAV3/NSD2                                                                                        |
| Biological Process | GO:1904892 | regulation of receptor signaling pathway via STAT         | 18/2279 | 151/18866 | 0.5616239 | 0.7342766 | 0.6643996 | 18 | IL10/MGAT5/PIGU/TNF/CCL5/CSF1R/TNFRSF1A/PTPRC/IL6R/PPP2R1A/NOTCH1/GGNBP2/F2R/BCL3/INPP5F/CRLF1/PARP9/LIF                                                                                                  |
| Biological Process | GO:0098742 | cell-cell adhesion via plasma-membrane adhesion molecules | 33/2279 | 277/18866 | 0.5620907 | 0.7344325 | 0.6645406 | 33 | BSG/IL10/CADM3/CD177/CRB1/CEACAM6/CDH23/CD84/TGFBR2/MBP/CDH3/SPARCL1/IL1RN/NRXN1/KIRREL3/CDHR2/DSCAML1/CDH4/ITGB2/CDH1/MYOT/CDHR1/SDK2/KIFAP3/PCDH12/CADM1/CDH11/MYADM/UNC5D/CEACAM5/JAML/NECTIN1/NECTIN4 |
| Biological Process | GO:0002251 | organ or tissue specific immune response                  | 5/2279  | 41/18866  | 0.5622842 | 0.7344325 | 0.6645406 | 5  | DEFA4/RNASE3/DEFB1/IL6R/LTF                                                                                                                                                                               |
| Biological Process | GO:0021532 | neural tube patterning                                    | 5/2279  | 41/18866  | 0.5622842 | 0.7344325 | 0.6645406 | 5  | SUFU/PAX7/IFT140/SSBP3/HES3                                                                                                                                                                               |
| Biological Process | GO:0051354 | negative regulation of oxidoreductase activity            | 5/2279  | 41/18866  | 0.5622842 | 0.7344325 | 0.6645406 | 5  | GFI1/CNR2/MIR138-2/NOSIP/PRKN                                                                                                                                                                             |
| Biological Process | GO:0071985 | multivesicular body sorting pathway                       | 5/2279  | 41/18866  | 0.5622842 | 0.7344325 | 0.6645406 | 5  | LYST/RAB27A/UVRAG/SORT1/MVB12A                                                                                                                                                                            |



|                    |            |                                                                 |         |           |           |           |           |    |                                                                                                                              |
|--------------------|------------|-----------------------------------------------------------------|---------|-----------|-----------|-----------|-----------|----|------------------------------------------------------------------------------------------------------------------------------|
| Biological Process | GO:2000008 | regulation of protein localization to cell surface              | 5/2279  | 41/18866  | 0.5622842 | 0.7344325 | 0.6645406 | 5  | KCNAB2/TM9SF4/TNF/ASTN2/MAP1A                                                                                                |
| Biological Process | GO:2000826 | regulation of heart morphogenesis                               | 5/2279  | 41/18866  | 0.5622842 | 0.7344325 | 0.6645406 | 5  | TGFBR2/RBPJ/WNT11/ENG/NOTCH1                                                                                                 |
| Biological Process | GO:1900407 | regulation of cellular response to oxidative stress             | 11/2279 | 92/18866  | 0.5624537 | 0.7345529 | 0.6646495 | 11 | P4HB/IL10/TNF/FBXO7/RIPK1/AIFM2/NOL3/NFE2L2/BAG5/SIRT3/PRKN                                                                  |
| Biological Process | GO:0007156 | homophilic cell adhesion via plasma membrane adhesion molecules | 20/2279 | 168/18866 | 0.5635448 | 0.7358767 | 0.6658474 | 20 | BSG/CADM3/CEACAM6/CDH23/CD84/CDH3/KIRREL3/CDHR2/DSCAML1/CDH4/CDH1/MYOT/CDHR1/SDK2/PCDH12/CADM1/CDH11/CEACAM5/NECTIN1/NECTIN4 |
| Biological Process | GO:2000134 | negative regulation of G1/S transition of mitotic cell cycle    | 15/2279 | 126/18866 | 0.5651935 | 0.7379282 | 0.6677036 | 15 | TFDP1/PRMT2/FBXO7/E2F7/CTDSPL/PCBP4/RIPK1/NACC2/ZNF385A/ARID3A/GFI1B/MIR138-2/RB1/BCL2/CHEK2                                 |
| Biological Process | GO:0003094 | glomerular filtration                                           | 3/2279  | 24/18866  | 0.5674164 | 0.7391038 | 0.6687674 | 3  | GJA5/PDGFB/F2R                                                                                                               |
| Biological Process | GO:0009218 | pyrimidine ribonucleotide metabolic process                     | 3/2279  | 24/18866  | 0.5674164 | 0.7391038 | 0.6687674 | 3  | UCK2/AK5/DHODH                                                                                                               |
| Biological Process | GO:0009309 | amine biosynthetic process                                      | 3/2279  | 24/18866  | 0.5674164 | 0.7391038 | 0.6687674 | 3  | ODC1/DDC/SULT1A2                                                                                                             |
| Biological Process | GO:0010869 | regulation of receptor biosynthetic process                     | 3/2279  | 24/18866  | 0.5674164 | 0.7391038 | 0.6687674 | 3  | PPARG/HDAC1/ITGB3                                                                                                            |

|                    |            |                                                    |        |          |           |           |           |   |                       |
|--------------------|------------|----------------------------------------------------|--------|----------|-----------|-----------|-----------|---|-----------------------|
| Biological Process | GO:0021697 | cerebellar cortex formation                        | 3/2279 | 24/18866 | 0.5674164 | 0.7391038 | 0.6687674 | 3 | DLL1/TTC21B/TLL1      |
| Biological Process | GO:0021801 | cerebral cortex radial glia guided migration       | 3/2279 | 24/18866 | 0.5674164 | 0.7391038 | 0.6687674 | 3 | RTN4/DISC1/ZMIZ1      |
| Biological Process | GO:0022030 | telencephalon glial cell migration                 | 3/2279 | 24/18866 | 0.5674164 | 0.7391038 | 0.6687674 | 3 | RTN4/DISC1/ZMIZ1      |
| Biological Process | GO:0031342 | negative regulation of cell killing                | 3/2279 | 24/18866 | 0.5674164 | 0.7391038 | 0.6687674 | 3 | HLA-F/PTPRC/ARRB2     |
| Biological Process | GO:0032331 | negative regulation of chondrocyte differentiation | 3/2279 | 24/18866 | 0.5674164 | 0.7391038 | 0.6687674 | 3 | RARG/RFLNA/CCN4       |
| Biological Process | GO:0032891 | negative regulation of organic acid transport      | 3/2279 | 24/18866 | 0.5674164 | 0.7391038 | 0.6687674 | 3 | THBS1/SLC43A2/SLC43A1 |
| Biological Process | GO:0033622 | integrin activation                                | 3/2279 | 24/18866 | 0.5674164 | 0.7391038 | 0.6687674 | 3 | ITGB1BP1/RAP1B/JAM3   |
| Biological Process | GO:0044062 | regulation of excretion                            | 3/2279 | 24/18866 | 0.5674164 | 0.7391038 | 0.6687674 | 3 | COMT/GNAI2/AGTR1      |
| Biological Process | GO:0044247 | cellular polysaccharide catabolic process          | 3/2279 | 24/18866 | 0.5674164 | 0.7391038 | 0.6687674 | 3 | AOAH/MGAM/PPP1CB      |

|                    |            |                                              |         |           |           |           |           |    |                                                                                                                                                                    |                                                                               |
|--------------------|------------|----------------------------------------------|---------|-----------|-----------|-----------|-----------|----|--------------------------------------------------------------------------------------------------------------------------------------------------------------------|-------------------------------------------------------------------------------|
| Biological Process | GO:0044346 | fibroblast apoptotic process                 | 3/2279  | 24/18866  | 0.5674164 | 0.7391038 | 0.6687674 | 3  |                                                                                                                                                                    | CUL3/MIR24-2/CHD8                                                             |
| Biological Process | GO:0045724 | positive regulation of cilium assembly       | 3/2279  | 24/18866  | 0.5674164 | 0.7391038 | 0.6687674 | 3  |                                                                                                                                                                    | CEP135/HTT/SEPTIN9                                                            |
| Biological Process | GO:0051446 | positive regulation of meiotic cell cycle    | 3/2279  | 24/18866  | 0.5674164 | 0.7391038 | 0.6687674 | 3  |                                                                                                                                                                    | CDC25A/OVOL1/PLCB1                                                            |
| Biological Process | GO:2000291 | regulation of myoblast proliferation         | 3/2279  | 24/18866  | 0.5674164 | 0.7391038 | 0.6687674 | 3  |                                                                                                                                                                    | PAX7/MEIS2/ANKRD2                                                             |
| Biological Process | GO:0000075 | cell cycle checkpoint                        | 26/2279 | 219/18866 | 0.5691171 | 0.7412175 | 0.6706799 | 26 | TRIM39/BLM/FZR1/TFDP1/MAD1L1/FOXN3/HUS1/E2F7/PCBP4/EME1/ZNF385A/TGFB1/ARID3A/TAOK3/ZFYVE19/CLSPN/RB1/TP53BP1/RHNO1/CHEK2/BCL2L1/NAE1/PCID2/MAP3K20/ABRAXAS1/BABAM2 |                                                                               |
| Biological Process | GO:1905710 | positive regulation of membrane permeability | 8/2279  | 67/18866  | 0.5700733 | 0.7421291 | 0.6715047 | 8  |                                                                                                                                                                    | TFDP1/YWHAH/BMF/SPG7/YWHAZ/BCL2/TP53BP2/YWHAQ                                 |
| Biological Process | GO:0001708 | cell fate specification                      | 12/2279 | 101/18866 | 0.5702857 | 0.7421291 | 0.6715047 | 12 |                                                                                                                                                                    | SUFU/MIAT/MGA/DLL1/RBPJ/WNT11/PAX2/FGFR1/FEV/NOTCH1/LMO4/NODAL                |
| Biological Process | GO:0006906 | vesicle fusion                               | 12/2279 | 101/18866 | 0.5702857 | 0.7421291 | 0.6715047 | 12 |                                                                                                                                                                    | CALR/STX5/VTI1A/ANKFY1/TGFBRAP1/UVRAG/VPS18/DYSF/TSNARE1/VAV3/IRAG2/RUBCNL    |
| Biological Process | GO:0015908 | fatty acid transport                         | 12/2279 | 101/18866 | 0.5702857 | 0.7421291 | 0.6715047 | 12 |                                                                                                                                                                    | PRKAG2/PPARG/ACSL1/MFSD2A/MAP2K6/ABCC2/THBS1/SLCO3A1/ACACB/ACACA/SLC2A1/CPT1A |

|                    |            |                                                   |         |           |           |           |           |    |                                                                                                                                                     |
|--------------------|------------|---------------------------------------------------|---------|-----------|-----------|-----------|-----------|----|-----------------------------------------------------------------------------------------------------------------------------------------------------|
| Biological Process | GO:0042632 | cholesterol homeostasis                           | 12/2279 | 101/18866 | 0.5702857 | 0.7421291 | 0.6715047 | 12 | EHD1/NR1I2/LRP5L/LIPC/VDR/ABCG1/MED13/NR1H2/ABCA1/NPC1/NR5A2/RALY                                                                                   |
| Biological Process | GO:1902882 | regulation of response to oxidative stress        | 12/2279 | 101/18866 | 0.5702857 | 0.7421291 | 0.6715047 | 12 | P4HB/IL10/TNF/FBXO7/RIPK1/AIFM2/NOL3/NFE2L2/ACOX2/BAG5/SIRT3/PRKN                                                                                   |
| Biological Process | GO:0006805 | xenobiotic metabolic process                      | 14/2279 | 118/18866 | 0.5711303 | 0.7430246 | 0.6723151 | 14 | NR1I2/ACSL1/GGT1/LPO/ABCC2/AIP/SULT1A2/POR/MGST2/GUK1/GSTO1/EPHX1/GSTO2/MTARC1                                                                      |
| Biological Process | GO:0021987 | cerebral cortex development                       | 14/2279 | 118/18866 | 0.5711303 | 0.7430246 | 0.6723151 | 14 | NDE1/BTBD3/RTN4/DISC1/TRAPPC9/ZMIZ1/NF1/TACC3/WDR47/NCOA1/PLCB1/SLC2A1/NDEL1/NPY                                                                    |
| Biological Process | GO:2000181 | negative regulation of blood vessel morphogenesis | 23/2279 | 194/18866 | 0.5715939 | 0.7431427 | 0.6724219 | 23 | PPARG/MIR143/MIR145/ITGB1BP1/CCR2/COL4A2/MIR199A1/TNF/AGO1/SEMA4A/THBS1/MIR24-2/EPN2/NF1/GHRL/VASH1/MIR138-2/MIR199A2/NOTCH1/GPR4/HHEX/PDE3B/CX3CR1 |
| Biological Process | GO:0009066 | aspartate family amino acid metabolic process     | 6/2279  | 50/18866  | 0.5716904 | 0.7431427 | 0.6724219 | 6  | MSRA/OGDH/MTHFD1/MAT1A/CRYM/ADI1                                                                                                                    |
| Biological Process | GO:0032608 | interferon-beta production                        | 6/2279  | 50/18866  | 0.5716904 | 0.7431427 | 0.6724219 | 6  | TRIM38/IRF5/TLR9/TRAIIP/FLOT1/STING1                                                                                                                |
| Biological Process | GO:0045646 | regulation of erythrocyte differentiation         | 6/2279  | 50/18866  | 0.5716904 | 0.7431427 | 0.6724219 | 6  | ZFPM1/INPP5D/BRD1/ETS1/KAT7/INHBA                                                                                                                   |
| Biological Process | GO:0061014 | positive regulation of mRNA catabolic process     | 6/2279  | 50/18866  | 0.5716904 | 0.7431427 | 0.6724219 | 6  | PRR5L/TNRC6B/ZC3H12D/AGO2/CPEB3/FTO                                                                                                                 |

|                    |            |                                              |         |           |           |           |           |    |                                                                                                                  |
|--------------------|------------|----------------------------------------------|---------|-----------|-----------|-----------|-----------|----|------------------------------------------------------------------------------------------------------------------|
| Biological Process | GO:1903580 | positive regulation of ATP metabolic process | 6/2279  | 50/18866  | 0.5716904 | 0.7431427 | 0.6724219 | 6  | ENO1/PFKFB4/APP/ESRRB/PFKFB3/PRKAA1                                                                              |
| Biological Process | GO:0001837 | epithelial to mesenchymal transition         | 18/2279 | 152/18866 | 0.5734264 | 0.7442152 | 0.6733924 | 18 | SPRED2/SMAD3/LDLRAD4/LOXL3/RTN4/TGFBR2/RBP1/TCF7L2/SMAD7/WNT11/FGFR1/TGFB1/TGFB111/WWTR1/ENG/NOTCH1/GCNT2/NOTCH4 |
| Biological Process | GO:0001975 | response to amphetamine                      | 4/2279  | 33/18866  | 0.5765395 | 0.7442152 | 0.6733924 | 4  | PPP1R1B/RGS17/CNR2/RGS10                                                                                         |
| Biological Process | GO:0006370 | 7-methylguanosine mRNA capping               | 4/2279  | 33/18866  | 0.5765395 | 0.7442152 | 0.6733924 | 4  | POLR2F/CCNH/ERCC2/NCBP3                                                                                          |
| Biological Process | GO:0009303 | rRNA transcription                           | 4/2279  | 33/18866  | 0.5765395 | 0.7442152 | 0.6733924 | 4  | BRF1/PIH1D1/MARS1/MACROH2A2                                                                                      |
| Biological Process | GO:0010955 | negative regulation of protein processing    | 4/2279  | 33/18866  | 0.5765395 | 0.7442152 | 0.6733924 | 4  | CTSZ/THBS1/NOL3/CPB2                                                                                             |
| Biological Process | GO:0021696 | cerebellar cortex morphogenesis              | 4/2279  | 33/18866  | 0.5765395 | 0.7442152 | 0.6733924 | 4  | DLL1/TTC21B/TLL1/COQ8B                                                                                           |
| Biological Process | GO:0030149 | sphingolipid catabolic process               | 4/2279  | 33/18866  | 0.5765395 | 0.7442152 | 0.6733924 | 4  | HEXB/GALC/SMPDL3B/PDXDC1                                                                                         |
| Biological Process | GO:0040020 | regulation of meiotic nuclear division       | 4/2279  | 33/18866  | 0.5765395 | 0.7442152 | 0.6733924 | 4  | CALR/FZR1/PLCB1/LIF                                                                                              |

|                    |            |                                                                       |         |           |           |           |           |    |                                                                                               |
|--------------------|------------|-----------------------------------------------------------------------|---------|-----------|-----------|-----------|-----------|----|-----------------------------------------------------------------------------------------------|
| Biological Process | GO:0043928 | exonucleolytic catabolism of deadenylated mRNA                        | 4/2279  | 33/18866  | 0.5765395 | 0.7442152 | 0.6733924 | 4  | LSM1/EXOSC2/EDC3/LSM7                                                                         |
| Biological Process | GO:0061311 | cell surface receptor signaling pathway involved in heart development | 4/2279  | 33/18866  | 0.5765395 | 0.7442152 | 0.6733924 | 4  | RBPJ/WNT11/TGFB1/NOTCH1                                                                       |
| Biological Process | GO:1901380 | negative regulation of potassium ion transmembrane transport          | 4/2279  | 33/18866  | 0.5765395 | 0.7442152 | 0.6733924 | 4  | KCNE1/CASQ2/BIN1/CAB39                                                                        |
| Biological Process | GO:1903318 | negative regulation of protein maturation                             | 4/2279  | 33/18866  | 0.5765395 | 0.7442152 | 0.6733924 | 4  | CTSZ/THBS1/NOL3/CPB2                                                                          |
| Biological Process | GO:1904893 | negative regulation of receptor signaling pathway via STAT            | 4/2279  | 33/18866  | 0.5765395 | 0.7442152 | 0.6733924 | 4  | PPP2R1A/GGNBP2/BCL3/INPP5F                                                                    |
| Biological Process | GO:0009141 | nucleoside triphosphate metabolic process                             | 13/2279 | 110/18866 | 0.5775618 | 0.7442152 | 0.6733924 | 13 | PRKAG2/AMPD3/ENO1/RRM2B/VPS9D1/SPHK2/TGFB1/UCK2/GUK1/PKM/AK5/IMPDH1/ATP5PD                    |
| Biological Process | GO:0072009 | nephron epithelium development                                        | 13/2279 | 110/18866 | 0.5775618 | 0.7442152 | 0.6733924 | 13 | TACSTD2/DLL1/ILK/WNT11/PAX2/MTSS1/WWTR1/BCL2/NOTCH1/MEF2C/ACAT1/LIF/HOXB7                     |
| Biological Process | GO:0001704 | formation of primary germ layer                                       | 15/2279 | 127/18866 | 0.5780621 | 0.7442152 | 0.6733924 | 15 | MIR145/SETD2/SMAD3/COL4A2/COL12A1/WNT11/PAX2/ITGB5/FGFR1/ITGB3/ITGB2/COL5A1/LAMB3/INHBA/NODAL |
| Biological Process | GO:0033077 | T cell differentiation in thymus                                      | 9/2279  | 76/18866  | 0.5781082 | 0.7442152 | 0.6733924 | 9  | ITPKB/RIPK3/ZC3H8/PTPRC/CLPTM1/BCL2/DOCK2/FADD/TMEM131L                                       |

|                    |            |                                               |         |           |           |           |           |    |                                                                                                                                                                                         |
|--------------------|------------|-----------------------------------------------|---------|-----------|-----------|-----------|-----------|----|-----------------------------------------------------------------------------------------------------------------------------------------------------------------------------------------|
| Biological Process | GO:0002218 | activation of innate immune response          | 17/2279 | 144/18866 | 0.5788296 | 0.7442152 | 0.6733924 | 17 | NLRC4/AIM2/CLEC4C/MNDA/MUC12/FCN1/TRIM5/MUC20/BCL10/PSMF1/CREBBP/PSMB7/RELA/FBXW11/HEXIM1/PSMD13/STING1                                                                                 |
| Biological Process | GO:0000723 | telomere maintenance                          | 19/2279 | 161/18866 | 0.5797728 | 0.7442152 | 0.6733924 | 19 | BLM/TNKS/POLE/BRCA2/HMBOX1/RTEL1/HUS1/NSMCE2/YLPM1/POLA2/SMARCAL1/SMG6/SP100/ERCC1/SLX4/POLD3/CCT6A/POLE4/TFIP11                                                                        |
| Biological Process | GO:0060113 | inner ear receptor cell differentiation       | 7/2279  | 59/18866  | 0.5800072 | 0.7442152 | 0.6733924 | 7  | CDH23/ATP8B1/DLL1/RBPJ/FGFR1/NOTCH1/TMC1                                                                                                                                                |
| Biological Process | GO:0071385 | cellular response to glucocorticoid stimulus  | 7/2279  | 59/18866  | 0.5800072 | 0.7442152 | 0.6733924 | 7  | AKAP13/ABCC2/SMYD3/FECH/AQP1/PCK2/FOXO1                                                                                                                                                 |
| Biological Process | GO:0051321 | meiotic cell cycle                            | 30/2279 | 254/18866 | 0.5817741 | 0.7442152 | 0.6733924 | 30 | PIWIL4/CALR/FZR1/MOV10L1/BRCA2/HUS1/EME1/MYH9/MEIOB/STK35/CDC25A/OVOL1/FANCA/RNF212/ZNF318/NUMA1/PPP2R1A/PLCB1/CCNA1/RAD21L1/DMC1/NPPC/ERCC1/SLX4/TEX12/TUBGCP2/LIF/KLHDC3/PSMD13/TERB2 |
| Biological Process | GO:0045137 | development of primary sexual characteristics | 27/2279 | 229/18866 | 0.5844093 | 0.7442152 | 0.6733924 | 27 | ARID5B/BRCA2/ARRB1/EIF2B5/CSDE1/FANCA/RDH10/RARA/SF1/BMPR1B/NCOA1/LHFPL2/ARRB2/NTRK1/HOXA9/RAD21L1/BCL2/DMC1/SLIT3/UBE3A/CEBPB/PDGFRB/ERCC1/BCL2L1/HMGCS1/NCOA4/INHBA                   |
| Biological Process | GO:0021983 | pituitary gland development                   | 5/2279  | 42/18866  | 0.5845448 | 0.7442152 | 0.6733924 | 5  | CREB1/RBPJ/ETS1/CDH1/ALDH1A2                                                                                                                                                            |
| Biological Process | GO:1904591 | positive regulation of protein import         | 5/2279  | 42/18866  | 0.5845448 | 0.7442152 | 0.6733924 | 5  | PIK3R1/SMAD3/JUP/TGFB1/CDH1                                                                                                                                                             |
| Biological Process | GO:0022600 | digestive system process                      | 12/2279 | 102/18866 | 0.5845769 | 0.7442152 | 0.6733924 | 12 | SLC2A5/TJP2/VDR/SGK1/TLR9/AQP1/NR1H2/GHRL/SLC22A5/KCNQ1/NOD2/EZR                                                                                                                        |

|                    |            |                                               |         |           |           |           |           |    |                                                                                                               |
|--------------------|------------|-----------------------------------------------|---------|-----------|-----------|-----------|-----------|----|---------------------------------------------------------------------------------------------------------------|
| Biological Process | GO:0055092 | sterol homeostasis                            | 12/2279 | 102/18866 | 0.5845769 | 0.7442152 | 0.6733924 | 12 | EHD1/NR1I2/LRP5L/LIPC/VDR/ABCG1/MED13/NR1H2/ABCA1/NPC1/NR5A2/RALY                                             |
| Biological Process | GO:0031123 | RNA 3'-end processing                         | 18/2279 | 153/18866 | 0.5851096 | 0.7442152 | 0.6733924 | 18 | FIP1L1/EXOSC2/CPSF3/APP/PABPN1/CPEB3/ERI3/SCAF8/ZC3H3/RPRD1B/TOE1/CPSF4/PTCD1/RNF40/FBL/TUT1/PAPOLG/GRSF1     |
| Biological Process | GO:0009199 | ribonucleoside triphosphate metabolic process | 10/2279 | 85/18866  | 0.58547   | 0.7442152 | 0.6733924 | 10 | PRKAG2/AMPD3/ENO1/VPS9D1/SPHK2/TGFB1/UCK2/PKM/IMPDH1/ATP5PD                                                   |
| Biological Process | GO:0070509 | calcium ion import                            | 10/2279 | 85/18866  | 0.58547   | 0.7442152 | 0.6733924 | 10 | TRPM2/TRIM27/CACNA1C/SLC8A1/SPHK2/PDGFB/PDGFRB/DYSF/CACNA1B/TRPV2                                             |
| Biological Process | GO:0072089 | stem cell proliferation                       | 15/2279 | 128/18866 | 0.5907776 | 0.7442152 | 0.6733924 | 15 | NDE1/RUNX1/DISC1/FGFR1/OVOL1/NF1/NUMB/PTPRC/ETV6/ZNF335/NOTCH1/ARHGEF2/KAT7/MECOM/CX3CR1                      |
| Biological Process | GO:0001738 | morphogenesis of a polarized epithelium       | 17/2279 | 145/18866 | 0.5907833 | 0.7442152 | 0.6733924 | 17 | AP2A1/VANGL1/PRICKLE2/ZDHHC7/WNT11/SMURF1/PFN1/ACTG1/PSMF1/WDR1/ARRB2/DAAM1/ASTN2/PSMB7/ANKRD6/PSMD13/CPLANE1 |
| Biological Process | GO:0002526 | acute inflammatory response                   | 13/2279 | 111/18866 | 0.5912046 | 0.7442152 | 0.6733924 | 13 | ELANE/S100A8/FUT7/SERPINA1/PPARG/TREM1/NLRP3/TNF/F12/IL6R/DNASE1L3/CEBPB/ANO6                                 |
| Biological Process | GO:0034440 | lipid oxidation                               | 13/2279 | 111/18866 | 0.5912046 | 0.7442152 | 0.6733924 | 13 | PRKAG2/PPARG/MFSD2A/AMACR/ACOXL/ACADM/POR/ACACB/ACOX2/ACAT1/CPT1A/ACADVL/PRKAA1                               |
| Biological Process | GO:0021879 | forebrain neuron differentiation              | 6/2279  | 51/18866  | 0.5917813 | 0.7442152 | 0.6733924 | 6  | NRP2/CSF1R/DISC1/ZMIZ1/RAPGEF2/INHBA                                                                          |



|                    |            |                                                                                          |         |          |           |           |           |    |                                                                     |
|--------------------|------------|------------------------------------------------------------------------------------------|---------|----------|-----------|-----------|-----------|----|---------------------------------------------------------------------|
| Biological Process | GO:0032206 | positive regulation of telomere maintenance                                              | 6/2279  | 51/18866 | 0.5917813 | 0.7442152 | 0.6733924 | 6  | TNKS/HMBOX1/RTEL1/ERCC1/SLX4/CCT6A                                  |
| Biological Process | GO:0043628 | ncRNA 3'-end processing                                                                  | 6/2279  | 51/18866 | 0.5917813 | 0.7442152 | 0.6733924 | 6  | EXOSC2/ERI3/TOE1/PTCD1/FBL/TUT1                                     |
| Biological Process | GO:0048255 | mRNA stabilization                                                                       | 6/2279  | 51/18866 | 0.5917813 | 0.7442152 | 0.6733924 | 6  | SLC11A1/LARP1/PAIP1/SYCRIP/TENT5C/TENT5A                            |
| Biological Process | GO:0098876 | vesicle-mediated transport to the plasma membrane                                        | 11/2279 | 94/18866 | 0.5922893 | 0.7442152 | 0.6733924 | 11 | OSBP5/KIF13A/DNM2/RAB31/SNX27/ZDHHC2/AKAP5/VAMP5/CSK/MICALL1/VPS35L |
| Biological Process | GO:0000394 | RNA splicing, via endonucleolytic cleavage and ligation                                  | 2/2279  | 16/18866 | 0.5924093 | 0.7442152 | 0.6733924 | 2  | ERN1/CPSF4                                                          |
| Biological Process | GO:0000478 | endonucleolytic cleavage involved in rRNA processing                                     | 2/2279  | 16/18866 | 0.5924093 | 0.7442152 | 0.6733924 | 2  | RCL1/NOP14                                                          |
| Biological Process | GO:0000479 | endonucleolytic cleavage of tricistronic rRNA transcript (SSU-rRNA, 5.8S rRNA, LSU-rRNA) | 2/2279  | 16/18866 | 0.5924093 | 0.7442152 | 0.6733924 | 2  | RCL1/NOP14                                                          |
| Biological Process | GO:0001732 | formation of cytoplasmic translation initiation complex                                  | 2/2279  | 16/18866 | 0.5924093 | 0.7442152 | 0.6733924 | 2  | EIF3M/EIF3H                                                         |
| Biological Process | GO:0006004 | fucose metabolic process                                                                 | 2/2279  | 16/18866 | 0.5924093 | 0.7442152 | 0.6733924 | 2  | FUT4/FUT7                                                           |

|                    |            |                                                       |        |          |           |           |           |   |                   |
|--------------------|------------|-------------------------------------------------------|--------|----------|-----------|-----------|-----------|---|-------------------|
| Biological Process | GO:0006103 | 2-oxoglutarate metabolic process                      | 2/2279 | 16/18866 | 0.5924093 | 0.7442152 | 0.6733924 | 2 | D2HGDH/OGDH       |
| Biological Process | GO:0006595 | polyamine metabolic process                           | 2/2279 | 16/18866 | 0.5924093 | 0.7442152 | 0.6733924 | 2 | ODC1/SAT2         |
| Biological Process | GO:0007076 | mitotic chromosome condensation                       | 2/2279 | 16/18866 | 0.5924093 | 0.7442152 | 0.6733924 | 2 | TTN/CDCA5         |
| Biological Process | GO:0007567 | parturition                                           | 2/2279 | 16/18866 | 0.5924093 | 0.7442152 | 0.6733924 | 2 | ARNTL/NODAL       |
| Biological Process | GO:0010225 | response to UV-C                                      | 2/2279 | 16/18866 | 0.5924093 | 0.7442152 | 0.6733924 | 2 | BRCA2/BCL3        |
| Biological Process | GO:0010919 | regulation of inositol phosphate biosynthetic process | 2/2279 | 16/18866 | 0.5924093 | 0.7442152 | 0.6733924 | 2 | P2RY6/HRH1        |
| Biological Process | GO:0010934 | macrophage cytokine production                        | 2/2279 | 16/18866 | 0.5924093 | 0.7442152 | 0.6733924 | 2 | SPON2/TGFB1       |
| Biological Process | GO:0010940 | positive regulation of necrotic cell death            | 2/2279 | 16/18866 | 0.5924093 | 0.7442152 | 0.6733924 | 2 | RIPK1/RIPK3       |
| Biological Process | GO:0014744 | positive regulation of muscle adaptation              | 2/2279 | 16/18866 | 0.5924093 | 0.7442152 | 0.6733924 | 2 | MIR199A1/MIR199A2 |

|                    |            |                                                             |        |          |           |           |           |   |                |
|--------------------|------------|-------------------------------------------------------------|--------|----------|-----------|-----------|-----------|---|----------------|
| Biological Process | GO:0030252 | growth hormone secretion                                    | 2/2279 | 16/18866 | 0.5924093 | 0.7442152 | 0.6733924 | 2 | ITSN1/GHRL     |
| Biological Process | GO:0032225 | regulation of synaptic transmission, dopaminergic           | 2/2279 | 16/18866 | 0.5924093 | 0.7442152 | 0.6733924 | 2 | ARRB2/FLOT1    |
| Biological Process | GO:0032604 | granulocyte macrophage colony-stimulating factor production | 2/2279 | 16/18866 | 0.5924093 | 0.7442152 | 0.6733924 | 2 | CD84/TLR9      |
| Biological Process | GO:0034310 | primary alcohol catabolic process                           | 2/2279 | 16/18866 | 0.5924093 | 0.7442152 | 0.6733924 | 2 | ALDH2/SULT1A2  |
| Biological Process | GO:0034380 | high-density lipoprotein particle assembly                  | 2/2279 | 16/18866 | 0.5924093 | 0.7442152 | 0.6733924 | 2 | NR1H2/ABCA1    |
| Biological Process | GO:0035067 | negative regulation of histone acetylation                  | 2/2279 | 16/18866 | 0.5924093 | 0.7442152 | 0.6733924 | 2 | CTBP1/PIH1D1   |
| Biological Process | GO:0035864 | response to potassium ion                                   | 2/2279 | 16/18866 | 0.5924093 | 0.7442152 | 0.6733924 | 2 | CRHBP/ADAMTS13 |
| Biological Process | GO:0035930 | corticosteroid hormone secretion                            | 2/2279 | 16/18866 | 0.5924093 | 0.7442152 | 0.6733924 | 2 | GHRL/AGTR1     |
| Biological Process | GO:0036124 | histone H3-K9 trimethylation                                | 2/2279 | 16/18866 | 0.5924093 | 0.7442152 | 0.6733924 | 2 | KDM4C/PIH1D1   |

|                    |            |                                                                  |        |          |           |           |           |   |                |
|--------------------|------------|------------------------------------------------------------------|--------|----------|-----------|-----------|-----------|---|----------------|
| Biological Process | GO:0042035 | regulation of cytokine biosynthetic process                      | 2/2279 | 16/18866 | 0.5924093 | 0.7442152 | 0.6733924 | 2 | IGF2BP3/ASB1   |
| Biological Process | GO:0042074 | cell migration involved in gastrulation                          | 2/2279 | 16/18866 | 0.5924093 | 0.7442152 | 0.6733924 | 2 | WNT11/NODAL    |
| Biological Process | GO:0042994 | cytoplasmic sequestering of transcription factor                 | 2/2279 | 16/18866 | 0.5924093 | 0.7442152 | 0.6733924 | 2 | IL10/SUFU      |
| Biological Process | GO:0043252 | sodium-independent organic anion transport                       | 2/2279 | 16/18866 | 0.5924093 | 0.7442152 | 0.6733924 | 2 | SLCO3A1/MFSD10 |
| Biological Process | GO:0044065 | regulation of respiratory system process                         | 2/2279 | 16/18866 | 0.5924093 | 0.7442152 | 0.6733924 | 2 | MTG2/FTO       |
| Biological Process | GO:0045725 | positive regulation of glycogen biosynthetic process             | 2/2279 | 16/18866 | 0.5924093 | 0.7442152 | 0.6733924 | 2 | DYRK2/ESRRB    |
| Biological Process | GO:0045953 | negative regulation of natural killer cell mediated cytotoxicity | 2/2279 | 16/18866 | 0.5924093 | 0.7442152 | 0.6733924 | 2 | HLA-F/ARRB2    |
| Biological Process | GO:0048012 | hepatocyte growth factor receptor signaling pathway              | 2/2279 | 16/18866 | 0.5924093 | 0.7442152 | 0.6733924 | 2 | ESM1/MUC20     |
| Biological Process | GO:0048311 | mitochondrion distribution                                       | 2/2279 | 16/18866 | 0.5924093 | 0.7442152 | 0.6733924 | 2 | MSTO1/DNM1L    |

|                    |            |                                                                          |        |          |           |           |           |   |                |
|--------------------|------------|--------------------------------------------------------------------------|--------|----------|-----------|-----------|-----------|---|----------------|
| Biological Process | GO:0048521 | negative regulation of behavior                                          | 2/2279 | 16/18866 | 0.5924093 | 0.7442152 | 0.6733924 | 2 | GHRL/TTC21B    |
| Biological Process | GO:0050655 | dermatan sulfate proteoglycan metabolic process                          | 2/2279 | 16/18866 | 0.5924093 | 0.7442152 | 0.6733924 | 2 | CSGALNACT1/DSE |
| Biological Process | GO:0050884 | neuromuscular process controlling posture                                | 2/2279 | 16/18866 | 0.5924093 | 0.7442152 | 0.6733924 | 2 | SCN1A/CNTNAP1  |
| Biological Process | GO:0050965 | detection of temperature stimulus involved in sensory perception of pain | 2/2279 | 16/18866 | 0.5924093 | 0.7442152 | 0.6733924 | 2 | ARRB2/NTRK1    |
| Biological Process | GO:0051284 | positive regulation of sequestering of calcium ion                       | 2/2279 | 16/18866 | 0.5924093 | 0.7442152 | 0.6733924 | 2 | CASQ2/GSTO1    |
| Biological Process | GO:0051444 | negative regulation of ubiquitin-protein transferase activity            | 2/2279 | 16/18866 | 0.5924093 | 0.7442152 | 0.6733924 | 2 | SMAD7/BAG5     |
| Biological Process | GO:0055119 | relaxation of cardiac muscle                                             | 2/2279 | 16/18866 | 0.5924093 | 0.7442152 | 0.6733924 | 2 | PDE4D/SLC8A1   |
| Biological Process | GO:0061684 | chaperone-mediated autophagy                                             | 2/2279 | 16/18866 | 0.5924093 | 0.7442152 | 0.6733924 | 2 | CLU/GFAP       |
| Biological Process | GO:0070103 | regulation of interleukin-6-mediated signaling pathway                   | 2/2279 | 16/18866 | 0.5924093 | 0.7442152 | 0.6733924 | 2 | GFI1/RIPK1     |

|                    |            |                                                                                          |        |          |           |           |           |   |               |
|--------------------|------------|------------------------------------------------------------------------------------------|--------|----------|-----------|-----------|-----------|---|---------------|
| Biological Process | GO:0070593 | dendrite self-avoidance                                                                  | 2/2279 | 16/18866 | 0.5924093 | 0.7442152 | 0.6733924 | 2 | BSG/DSCAML1   |
| Biological Process | GO:0071871 | response to epinephrine                                                                  | 2/2279 | 16/18866 | 0.5924093 | 0.7442152 | 0.6733924 | 2 | PDE4D/KCNQ1   |
| Biological Process | GO:0072176 | nephric duct development                                                                 | 2/2279 | 16/18866 | 0.5924093 | 0.7442152 | 0.6733924 | 2 | WNT11/PAX2    |
| Biological Process | GO:0072283 | metanephric renal vesicle morphogenesis                                                  | 2/2279 | 16/18866 | 0.5924093 | 0.7442152 | 0.6733924 | 2 | PAX2/LIF      |
| Biological Process | GO:0097091 | synaptic vesicle clustering                                                              | 2/2279 | 16/18866 | 0.5924093 | 0.7442152 | 0.6733924 | 2 | SYN3/SYN2     |
| Biological Process | GO:1900121 | negative regulation of receptor binding                                                  | 2/2279 | 16/18866 | 0.5924093 | 0.7442152 | 0.6733924 | 2 | IL10/ATP2A3   |
| Biological Process | GO:1902514 | regulation of calcium ion transmembrane transport via high voltage-gated calcium channel | 2/2279 | 16/18866 | 0.5924093 | 0.7442152 | 0.6733924 | 2 | BIN1/NOS1AP   |
| Biological Process | GO:1904862 | inhibitory synapse assembly                                                              | 2/2279 | 16/18866 | 0.5924093 | 0.7442152 | 0.6733924 | 2 | SEMA4A/SEMA4D |
| Biological Process | GO:1905516 | positive regulation of fertilization                                                     | 2/2279 | 16/18866 | 0.5924093 | 0.7442152 | 0.6733924 | 2 | LHFPL2/PLCB1  |

|                    |            |                                                     |        |          |           |           |           |   |                 |
|--------------------|------------|-----------------------------------------------------|--------|----------|-----------|-----------|-----------|---|-----------------|
| Biological Process | GO:1905874 | regulation of postsynaptic density organization     | 2/2279 | 16/18866 | 0.5924093 | 0.7442152 | 0.6733924 | 2 | ZMYND8/NRXN1    |
| Biological Process | GO:2001212 | regulation of vasculogenesis                        | 2/2279 | 16/18866 | 0.5924093 | 0.7442152 | 0.6733924 | 2 | RIN2/RAPGEF2    |
| Biological Process | GO:2001224 | positive regulation of neuron migration             | 2/2279 | 16/18866 | 0.5924093 | 0.7442152 | 0.6733924 | 2 | RAPGEF2/ARHGEF2 |
| Biological Process | GO:0001554 | luteolysis                                          | 1/2279 | 7/18866  | 0.5939779 | 0.7442152 | 0.6733924 | 1 | SLIT3           |
| Biological Process | GO:0001842 | neural fold formation                               | 1/2279 | 7/18866  | 0.5939779 | 0.7442152 | 0.6733924 | 1 | NODAL           |
| Biological Process | GO:0001866 | NK T cell proliferation                             | 1/2279 | 7/18866  | 0.5939779 | 0.7442152 | 0.6733924 | 1 | ZBTB7B          |
| Biological Process | GO:0001915 | negative regulation of T cell mediated cytotoxicity | 1/2279 | 7/18866  | 0.5939779 | 0.7442152 | 0.6733924 | 1 | PTPRC           |
| Biological Process | GO:0002069 | columnar/cuboidal epithelial cell maturation        | 1/2279 | 7/18866  | 0.5939779 | 0.7442152 | 0.6733924 | 1 | RFX3            |
| Biological Process | GO:0002154 | thyroid hormone mediated signaling pathway          | 1/2279 | 7/18866  | 0.5939779 | 0.7442152 | 0.6733924 | 1 | NCOA1           |

|                    |            |                                                                                       |        |         |           |           |           |   |        |
|--------------------|------------|---------------------------------------------------------------------------------------|--------|---------|-----------|-----------|-----------|---|--------|
| Biological Process | GO:0002428 | antigen processing and presentation of peptide antigen via MHC class Ib               | 1/2279 | 7/18866 | 0.5939779 | 0.7442152 | 0.6733924 | 1 | HLA-F  |
| Biological Process | GO:0002536 | respiratory burst involved in inflammatory response                                   | 1/2279 | 7/18866 | 0.5939779 | 0.7442152 | 0.6733924 | 1 | GRN    |
| Biological Process | GO:0002857 | positive regulation of natural killer cell mediated immune response to tumor cell     | 1/2279 | 7/18866 | 0.5939779 | 0.7442152 | 0.6733924 | 1 | CD226  |
| Biological Process | GO:0002924 | negative regulation of humoral immune response mediated by circulating immunoglobulin | 1/2279 | 7/18866 | 0.5939779 | 0.7442152 | 0.6733924 | 1 | PTPN6  |
| Biological Process | GO:0003228 | atrial cardiac muscle tissue development                                              | 1/2279 | 7/18866 | 0.5939779 | 0.7442152 | 0.6733924 | 1 | ENG    |
| Biological Process | GO:0003308 | negative regulation of Wnt signaling pathway involved in heart development            | 1/2279 | 7/18866 | 0.5939779 | 0.7442152 | 0.6733924 | 1 | WNT11  |
| Biological Process | GO:0003321 | positive regulation of blood pressure by epinephrine-norepinephrine                   | 1/2279 | 7/18866 | 0.5939779 | 0.7442152 | 0.6733924 | 1 | PDE4D  |
| Biological Process | GO:0003357 | noradrenergic neuron differentiation                                                  | 1/2279 | 7/18866 | 0.5939779 | 0.7442152 | 0.6733924 | 1 | PHOX2A |
| Biological Process | GO:0006489 | dolichyl diphosphate biosynthetic process                                             | 1/2279 | 7/18866 | 0.5939779 | 0.7442152 | 0.6733924 | 1 | DPAGT1 |



|                    |            |                                                                   |        |         |           |           |           |   |         |
|--------------------|------------|-------------------------------------------------------------------|--------|---------|-----------|-----------|-----------|---|---------|
| Biological Process | GO:0006578 | amino-acid betaine biosynthetic process                           | 1/2279 | 7/18866 | 0.5939779 | 0.7442152 | 0.6733924 | 1 | ACADM   |
| Biological Process | GO:0006627 | protein processing involved in protein targeting to mitochondrion | 1/2279 | 7/18866 | 0.5939779 | 0.7442152 | 0.6733924 | 1 | MIPEP   |
| Biological Process | GO:0006685 | sphingomyelin catabolic process                                   | 1/2279 | 7/18866 | 0.5939779 | 0.7442152 | 0.6733924 | 1 | SMPDL3B |
| Biological Process | GO:0006689 | ganglioside catabolic process                                     | 1/2279 | 7/18866 | 0.5939779 | 0.7442152 | 0.6733924 | 1 | HEXB    |
| Biological Process | GO:0006701 | progesterone biosynthetic process                                 | 1/2279 | 7/18866 | 0.5939779 | 0.7442152 | 0.6733924 | 1 | DGKQ    |
| Biological Process | GO:0006771 | riboflavin metabolic process                                      | 1/2279 | 7/18866 | 0.5939779 | 0.7442152 | 0.6733924 | 1 | SLC52A2 |
| Biological Process | GO:0006824 | cobalt ion transport                                              | 1/2279 | 7/18866 | 0.5939779 | 0.7442152 | 0.6733924 | 1 | SLC11A2 |
| Biological Process | GO:0007000 | nucleolus organization                                            | 1/2279 | 7/18866 | 0.5939779 | 0.7442152 | 0.6733924 | 1 | USP36   |
| Biological Process | GO:0007406 | negative regulation of neuroblast proliferation                   | 1/2279 | 7/18866 | 0.5939779 | 0.7442152 | 0.6733924 | 1 | NF1     |

|                    |            |                                                           |        |         |           |           |           |   |          |
|--------------------|------------|-----------------------------------------------------------|--------|---------|-----------|-----------|-----------|---|----------|
| Biological Process | GO:0008063 | Toll signaling pathway                                    | 1/2279 | 7/18866 | 0.5939779 | 0.7442152 | 0.6733924 | 1 | PELI1    |
| Biological Process | GO:0009635 | response to herbicide                                     | 1/2279 | 7/18866 | 0.5939779 | 0.7442152 | 0.6733924 | 1 | LCN2     |
| Biological Process | GO:0009820 | alkaloid metabolic process                                | 1/2279 | 7/18866 | 0.5939779 | 0.7442152 | 0.6733924 | 1 | DDC      |
| Biological Process | GO:0010571 | positive regulation of nuclear cell cycle DNA replication | 1/2279 | 7/18866 | 0.5939779 | 0.7442152 | 0.6733924 | 1 | FGFR1    |
| Biological Process | GO:0010753 | positive regulation of cGMP-mediated signaling            | 1/2279 | 7/18866 | 0.5939779 | 0.7442152 | 0.6733924 | 1 | NPPC     |
| Biological Process | GO:0010764 | negative regulation of fibroblast migration               | 1/2279 | 7/18866 | 0.5939779 | 0.7442152 | 0.6733924 | 1 | ITGB1BP1 |
| Biological Process | GO:0010968 | regulation of microtubule nucleation                      | 1/2279 | 7/18866 | 0.5939779 | 0.7442152 | 0.6733924 | 1 | DCTN1    |
| Biological Process | GO:0010982 | regulation of high-density lipoprotein particle clearance | 1/2279 | 7/18866 | 0.5939779 | 0.7442152 | 0.6733924 | 1 | GPLD1    |
| Biological Process | GO:0010994 | free ubiquitin chain polymerization                       | 1/2279 | 7/18866 | 0.5939779 | 0.7442152 | 0.6733924 | 1 | PRKN     |

|                    |            |                                            |        |         |           |           |           |   |         |
|--------------------|------------|--------------------------------------------|--------|---------|-----------|-----------|-----------|---|---------|
| Biological Process | GO:0014827 | intestine smooth muscle contraction        | 1/2279 | 7/18866 | 0.5939779 | 0.7442152 | 0.6733924 | 1 | GHRL    |
| Biological Process | GO:0015744 | succinate transport                        | 1/2279 | 7/18866 | 0.5939779 | 0.7442152 | 0.6733924 | 1 | SLC13A5 |
| Biological Process | GO:0015822 | ornithine transport                        | 1/2279 | 7/18866 | 0.5939779 | 0.7442152 | 0.6733924 | 1 | SLC7A1  |
| Biological Process | GO:0016198 | axon choice point recognition              | 1/2279 | 7/18866 | 0.5939779 | 0.7442152 | 0.6733924 | 1 | APP     |
| Biological Process | GO:0017196 | N-terminal peptidyl-methionine acetylation | 1/2279 | 7/18866 | 0.5939779 | 0.7442152 | 0.6733924 | 1 | NAA16   |
| Biological Process | GO:0019530 | taurine metabolic process                  | 1/2279 | 7/18866 | 0.5939779 | 0.7442152 | 0.6733924 | 1 | STAT5A  |
| Biological Process | GO:0019694 | alkanesulfonate metabolic process          | 1/2279 | 7/18866 | 0.5939779 | 0.7442152 | 0.6733924 | 1 | STAT5A  |
| Biological Process | GO:0021626 | central nervous system maturation          | 1/2279 | 7/18866 | 0.5939779 | 0.7442152 | 0.6733924 | 1 | CX3CR1  |
| Biological Process | GO:0021798 | forebrain dorsal/ventral pattern formation | 1/2279 | 7/18866 | 0.5939779 | 0.7442152 | 0.6733924 | 1 | TTC21B  |

|                    |            |                                                                             |        |         |           |           |           |   |         |
|--------------------|------------|-----------------------------------------------------------------------------|--------|---------|-----------|-----------|-----------|---|---------|
| Biological Process | GO:0021910 | smoothened signaling pathway involved in ventral spinal cord patterning     | 1/2279 | 7/18866 | 0.5939779 | 0.7442152 | 0.6733924 | 1 | SUFU    |
| Biological Process | GO:0023041 | neuronal signal transduction                                                | 1/2279 | 7/18866 | 0.5939779 | 0.7442152 | 0.6733924 | 1 | CLU     |
| Biological Process | GO:0030046 | parallel actin filament bundle assembly                                     | 1/2279 | 7/18866 | 0.5939779 | 0.7442152 | 0.6733924 | 1 | ESPN    |
| Biological Process | GO:0031086 | nuclear-transcribed mRNA catabolic process, deadenylation-independent decay | 1/2279 | 7/18866 | 0.5939779 | 0.7442152 | 0.6733924 | 1 | EDC3    |
| Biological Process | GO:0031547 | brain-derived neurotrophic factor receptor signaling pathway                | 1/2279 | 7/18866 | 0.5939779 | 0.7442152 | 0.6733924 | 1 | RAPGEF2 |
| Biological Process | GO:0031622 | positive regulation of fever generation                                     | 1/2279 | 7/18866 | 0.5939779 | 0.7442152 | 0.6733924 | 1 | TNF     |
| Biological Process | GO:0032229 | negative regulation of synaptic transmission, GABAergic                     | 1/2279 | 7/18866 | 0.5939779 | 0.7442152 | 0.6733924 | 1 | CNR2    |
| Biological Process | GO:0032261 | purine nucleotide salvage                                                   | 1/2279 | 7/18866 | 0.5939779 | 0.7442152 | 0.6733924 | 1 | AMPD3   |
| Biological Process | GO:0032277 | negative regulation of gonadotropin secretion                               | 1/2279 | 7/18866 | 0.5939779 | 0.7442152 | 0.6733924 | 1 | INHBA   |

|                    |            |                                                                    |        |         |           |           |           |   |          |
|--------------------|------------|--------------------------------------------------------------------|--------|---------|-----------|-----------|-----------|---|----------|
| Biological Process | GO:0032278 | positive regulation of gonadotropin secretion                      | 1/2279 | 7/18866 | 0.5939779 | 0.7442152 | 0.6733924 | 1 | INHBA    |
| Biological Process | GO:0032430 | positive regulation of phospholipase A2 activity                   | 1/2279 | 7/18866 | 0.5939779 | 0.7442152 | 0.6733924 | 1 | AGTR1    |
| Biological Process | GO:0032489 | regulation of Cdc42 protein signal transduction                    | 1/2279 | 7/18866 | 0.5939779 | 0.7442152 | 0.6733924 | 1 | ABCA1    |
| Biological Process | GO:0032625 | interleukin-21 production                                          | 1/2279 | 7/18866 | 0.5939779 | 0.7442152 | 0.6733924 | 1 | FOXP1    |
| Biological Process | GO:0032714 | negative regulation of interleukin-5 production                    | 1/2279 | 7/18866 | 0.5939779 | 0.7442152 | 0.6733924 | 1 | TNFRSF21 |
| Biological Process | GO:0032762 | mast cell cytokine production                                      | 1/2279 | 7/18866 | 0.5939779 | 0.7442152 | 0.6733924 | 1 | BCL10    |
| Biological Process | GO:0032914 | positive regulation of transforming growth factor beta1 production | 1/2279 | 7/18866 | 0.5939779 | 0.7442152 | 0.6733924 | 1 | THBS1    |
| Biological Process | GO:0032988 | ribonucleoprotein complex disassembly                              | 1/2279 | 7/18866 | 0.5939779 | 0.7442152 | 0.6733924 | 1 | TFIP11   |
| Biological Process | GO:0033211 | adiponectin-activated signaling pathway                            | 1/2279 | 7/18866 | 0.5939779 | 0.7442152 | 0.6733924 | 1 | ACSL1    |

|                    |            |                                                            |        |         |           |           |           |   |         |
|--------------------|------------|------------------------------------------------------------|--------|---------|-----------|-----------|-----------|---|---------|
| Biological Process | GO:0033313 | meiotic cell cycle checkpoint                              | 1/2279 | 7/18866 | 0.5939779 | 0.7442152 | 0.6733924 | 1 | HUS1    |
| Biological Process | GO:0033564 | anterior/posterior axon guidance                           | 1/2279 | 7/18866 | 0.5939779 | 0.7442152 | 0.6733924 | 1 | UNC5B   |
| Biological Process | GO:0035356 | cellular triglyceride homeostasis                          | 1/2279 | 7/18866 | 0.5939779 | 0.7442152 | 0.6733924 | 1 | C1QTNF3 |
| Biological Process | GO:0035482 | gastric motility                                           | 1/2279 | 7/18866 | 0.5939779 | 0.7442152 | 0.6733924 | 1 | GHRL    |
| Biological Process | GO:0035507 | regulation of myosin-light-chain-phosphatase activity      | 1/2279 | 7/18866 | 0.5939779 | 0.7442152 | 0.6733924 | 1 | TNF     |
| Biological Process | GO:0035726 | common myeloid progenitor cell proliferation               | 1/2279 | 7/18866 | 0.5939779 | 0.7442152 | 0.6733924 | 1 | ITPKB   |
| Biological Process | GO:0035795 | negative regulation of mitochondrial membrane permeability | 1/2279 | 7/18866 | 0.5939779 | 0.7442152 | 0.6733924 | 1 | HK2     |
| Biological Process | GO:0035989 | tendon development                                         | 1/2279 | 7/18866 | 0.5939779 | 0.7442152 | 0.6733924 | 1 | COL5A1  |
| Biological Process | GO:0036089 | cleavage furrow formation                                  | 1/2279 | 7/18866 | 0.5939779 | 0.7442152 | 0.6733924 | 1 | SNX18   |

|                    |            |                                                                                               |        |         |           |           |           |   |        |
|--------------------|------------|-----------------------------------------------------------------------------------------------|--------|---------|-----------|-----------|-----------|---|--------|
| Biological Process | GO:0036123 | histone H3-K9 dimethylation                                                                   | 1/2279 | 7/18866 | 0.5939779 | 0.7442152 | 0.6733924 | 1 | PIH1D1 |
| Biological Process | GO:0036302 | atrioventricular canal development                                                            | 1/2279 | 7/18866 | 0.5939779 | 0.7442152 | 0.6733924 | 1 | RBPJ   |
| Biological Process | GO:0036491 | regulation of translation initiation in response to endoplasmic reticulum stress              | 1/2279 | 7/18866 | 0.5939779 | 0.7442152 | 0.6733924 | 1 | NCK2   |
| Biological Process | GO:0038001 | paracrine signaling                                                                           | 1/2279 | 7/18866 | 0.5939779 | 0.7442152 | 0.6733924 | 1 | PDGFB  |
| Biological Process | GO:0038026 | reelin-mediated signaling pathway                                                             | 1/2279 | 7/18866 | 0.5939779 | 0.7442152 | 0.6733924 | 1 | STAT5A |
| Biological Process | GO:0038089 | positive regulation of cell migration by vascular endothelial growth factor signaling pathway | 1/2279 | 7/18866 | 0.5939779 | 0.7442152 | 0.6733924 | 1 | MYO1C  |
| Biological Process | GO:0038107 | nodal signaling pathway involved in determination of left/right asymmetry                     | 1/2279 | 7/18866 | 0.5939779 | 0.7442152 | 0.6733924 | 1 | NODAL  |
| Biological Process | GO:0042723 | thiamine-containing compound metabolic process                                                | 1/2279 | 7/18866 | 0.5939779 | 0.7442152 | 0.6733924 | 1 | ACP3   |
| Biological Process | GO:0042747 | circadian sleep/wake cycle, REM sleep                                                         | 1/2279 | 7/18866 | 0.5939779 | 0.7442152 | 0.6733924 | 1 | GHRL   |

|                    |            |                                                             |        |         |           |           |           |   |        |
|--------------------|------------|-------------------------------------------------------------|--------|---------|-----------|-----------|-----------|---|--------|
| Biological Process | GO:0043102 | amino acid salvage                                          | 1/2279 | 7/18866 | 0.5939779 | 0.7442152 | 0.6733924 | 1 | ADI1   |
| Biological Process | GO:0043307 | eosinophil activation                                       | 1/2279 | 7/18866 | 0.5939779 | 0.7442152 | 0.6733924 | 1 | CCR2   |
| Biological Process | GO:0043634 | polyadenylation-dependent ncRNA catabolic process           | 1/2279 | 7/18866 | 0.5939779 | 0.7442152 | 0.6733924 | 1 | EXOSC2 |
| Biological Process | GO:0043654 | recognition of apoptotic cell                               | 1/2279 | 7/18866 | 0.5939779 | 0.7442152 | 0.6733924 | 1 | FCN1   |
| Biological Process | GO:0043983 | histone H4-K12 acetylation                                  | 1/2279 | 7/18866 | 0.5939779 | 0.7442152 | 0.6733924 | 1 | KAT7   |
| Biological Process | GO:0044341 | sodium-dependent phosphate transport                        | 1/2279 | 7/18866 | 0.5939779 | 0.7442152 | 0.6733924 | 1 | CEBPB  |
| Biological Process | GO:0044362 | negative regulation of molecular function in other organism | 1/2279 | 7/18866 | 0.5939779 | 0.7442152 | 0.6733924 | 1 | SFTPD  |
| Biological Process | GO:0044528 | regulation of mitochondrial mRNA stability                  | 1/2279 | 7/18866 | 0.5939779 | 0.7442152 | 0.6733924 | 1 | TBRG4  |
| Biological Process | GO:0044806 | G-quadruplex DNA unwinding                                  | 1/2279 | 7/18866 | 0.5939779 | 0.7442152 | 0.6733924 | 1 | BLM    |



|                    |            |                                                           |        |         |           |           |           |   |        |
|--------------------|------------|-----------------------------------------------------------|--------|---------|-----------|-----------|-----------|---|--------|
| Biological Process | GO:0045054 | constitutive secretory pathway                            | 1/2279 | 7/18866 | 0.5939779 | 0.7442152 | 0.6733924 | 1 | RAB27A |
| Biological Process | GO:0045341 | MHC class I biosynthetic process                          | 1/2279 | 7/18866 | 0.5939779 | 0.7442152 | 0.6733924 | 1 | NLRC5  |
| Biological Process | GO:0045343 | regulation of MHC class I biosynthetic process            | 1/2279 | 7/18866 | 0.5939779 | 0.7442152 | 0.6733924 | 1 | NLRC5  |
| Biological Process | GO:0045588 | positive regulation of gamma-delta T cell differentiation | 1/2279 | 7/18866 | 0.5939779 | 0.7442152 | 0.6733924 | 1 | PTPRC  |
| Biological Process | GO:0045650 | negative regulation of macrophage differentiation         | 1/2279 | 7/18866 | 0.5939779 | 0.7442152 | 0.6733924 | 1 | INHBA  |
| Biological Process | GO:0045852 | pH elevation                                              | 1/2279 | 7/18866 | 0.5939779 | 0.7442152 | 0.6733924 | 1 | BCL2   |
| Biological Process | GO:0046465 | dolichyl diphosphate metabolic process                    | 1/2279 | 7/18866 | 0.5939779 | 0.7442152 | 0.6733924 | 1 | DPAGT1 |
| Biological Process | GO:0046836 | glycolipid transport                                      | 1/2279 | 7/18866 | 0.5939779 | 0.7442152 | 0.6733924 | 1 | PLTP   |
| Biological Process | GO:0046877 | regulation of saliva secretion                            | 1/2279 | 7/18866 | 0.5939779 | 0.7442152 | 0.6733924 | 1 | AQP1   |

|                    |            |                                                                                               |        |         |           |           |           |   |       |
|--------------------|------------|-----------------------------------------------------------------------------------------------|--------|---------|-----------|-----------|-----------|---|-------|
| Biological Process | GO:0046884 | follicle-stimulating hormone secretion                                                        | 1/2279 | 7/18866 | 0.5939779 | 0.7442152 | 0.6733924 | 1 | INHBA |
| Biological Process | GO:0048003 | antigen processing and presentation of lipid antigen via MHC class Ib                         | 1/2279 | 7/18866 | 0.5939779 | 0.7442152 | 0.6733924 | 1 | AP3D1 |
| Biological Process | GO:0048007 | antigen processing and presentation, exogenous lipid antigen via MHC class Ib                 | 1/2279 | 7/18866 | 0.5939779 | 0.7442152 | 0.6733924 | 1 | AP3D1 |
| Biological Process | GO:0048318 | axial mesoderm development                                                                    | 1/2279 | 7/18866 | 0.5939779 | 0.7442152 | 0.6733924 | 1 | NODAL |
| Biological Process | GO:0048341 | paraxial mesoderm formation                                                                   | 1/2279 | 7/18866 | 0.5939779 | 0.7442152 | 0.6733924 | 1 | WNT11 |
| Biological Process | GO:0048630 | skeletal muscle tissue growth                                                                 | 1/2279 | 7/18866 | 0.5939779 | 0.7442152 | 0.6733924 | 1 | DLL1  |
| Biological Process | GO:0050957 | equilibrioception                                                                             | 1/2279 | 7/18866 | 0.5939779 | 0.7442152 | 0.6733924 | 1 | CDH23 |
| Biological Process | GO:0051005 | negative regulation of lipoprotein lipase activity                                            | 1/2279 | 7/18866 | 0.5939779 | 0.7442152 | 0.6733924 | 1 | SORT1 |
| Biological Process | GO:0052204 | negative regulation of molecular function in other organism involved in symbiotic interaction | 1/2279 | 7/18866 | 0.5939779 | 0.7442152 | 0.6733924 | 1 | SFTPD |

|                    |            |                                                   |        |         |           |           |           |   |        |
|--------------------|------------|---------------------------------------------------|--------|---------|-----------|-----------|-----------|---|--------|
| Biological Process | GO:0052428 | modulation by host of symbiont molecular function | 1/2279 | 7/18866 | 0.5939779 | 0.7442152 | 0.6733924 | 1 | SFTPD  |
| Biological Process | GO:0060028 | convergent extension involved in axis elongation  | 1/2279 | 7/18866 | 0.5939779 | 0.7442152 | 0.6733924 | 1 | WNT11  |
| Biological Process | GO:0060052 | neurofilament cytoskeleton organization           | 1/2279 | 7/18866 | 0.5939779 | 0.7442152 | 0.6733924 | 1 | NDEL1  |
| Biological Process | GO:0060059 | embryonic retina morphogenesis in camera-type eye | 1/2279 | 7/18866 | 0.5939779 | 0.7442152 | 0.6733924 | 1 | HIPK2  |
| Biological Process | GO:0060437 | lung growth                                       | 1/2279 | 7/18866 | 0.5939779 | 0.7442152 | 0.6733924 | 1 | PDGFRB |
| Biological Process | GO:0060449 | bud elongation involved in lung branching         | 1/2279 | 7/18866 | 0.5939779 | 0.7442152 | 0.6733924 | 1 | RDH10  |
| Biological Process | GO:0060613 | fat pad development                               | 1/2279 | 7/18866 | 0.5939779 | 0.7442152 | 0.6733924 | 1 | ARID5B |
| Biological Process | GO:0060710 | chorio-allantoic fusion                           | 1/2279 | 7/18866 | 0.5939779 | 0.7442152 | 0.6733924 | 1 | DNAJB6 |
| Biological Process | GO:0061044 | negative regulation of vascular wound healing     | 1/2279 | 7/18866 | 0.5939779 | 0.7442152 | 0.6733924 | 1 | TNF    |

|                    |            |                                                               |        |         |           |           |           |   |         |
|--------------------|------------|---------------------------------------------------------------|--------|---------|-----------|-----------|-----------|---|---------|
| Biological Process | GO:0061087 | positive regulation of histone H3-K27 methylation             | 1/2279 | 7/18866 | 0.5939779 | 0.7442152 | 0.6733924 | 1 | PHF19   |
| Biological Process | GO:0061316 | canonical Wnt signaling pathway involved in heart development | 1/2279 | 7/18866 | 0.5939779 | 0.7442152 | 0.6733924 | 1 | RBPJ    |
| Biological Process | GO:0070244 | negative regulation of thymocyte apoptotic process            | 1/2279 | 7/18866 | 0.5939779 | 0.7442152 | 0.6733924 | 1 | PTCRA   |
| Biological Process | GO:0070305 | response to cGMP                                              | 1/2279 | 7/18866 | 0.5939779 | 0.7442152 | 0.6733924 | 1 | RAPGEF2 |
| Biological Process | GO:0071051 | polyadenylation-dependent snoRNA 3'-end processing            | 1/2279 | 7/18866 | 0.5939779 | 0.7442152 | 0.6733924 | 1 | EXOSC2  |
| Biological Process | GO:0071265 | L-methionine biosynthetic process                             | 1/2279 | 7/18866 | 0.5939779 | 0.7442152 | 0.6733924 | 1 | ADI1    |
| Biological Process | GO:0071267 | L-methionine salvage                                          | 1/2279 | 7/18866 | 0.5939779 | 0.7442152 | 0.6733924 | 1 | ADI1    |
| Biological Process | GO:0071362 | cellular response to ether                                    | 1/2279 | 7/18866 | 0.5939779 | 0.7442152 | 0.6733924 | 1 | LARP1   |
| Biological Process | GO:0071422 | succinate transmembrane transport                             | 1/2279 | 7/18866 | 0.5939779 | 0.7442152 | 0.6733924 | 1 | SLC13A5 |

|                    |            |                                                                                    |        |         |           |           |           |   |         |
|--------------------|------------|------------------------------------------------------------------------------------|--------|---------|-----------|-----------|-----------|---|---------|
| Biological Process | GO:0071694 | maintenance of protein location in extracellular region                            | 1/2279 | 7/18866 | 0.5939779 | 0.7442152 | 0.6733924 | 1 | LTBP1   |
| Biological Process | GO:0071947 | protein deubiquitination involved in ubiquitin-dependent protein catabolic process | 1/2279 | 7/18866 | 0.5939779 | 0.7442152 | 0.6733924 | 1 | TNFAIP3 |
| Biological Process | GO:0072235 | metanephric distal tubule development                                              | 1/2279 | 7/18866 | 0.5939779 | 0.7442152 | 0.6733924 | 1 | PAX2    |
| Biological Process | GO:0072319 | vesicle uncoating                                                                  | 1/2279 | 7/18866 | 0.5939779 | 0.7442152 | 0.6733924 | 1 | SH3GL1  |
| Biological Process | GO:0072526 | pyridine-containing compound catabolic process                                     | 1/2279 | 7/18866 | 0.5939779 | 0.7442152 | 0.6733924 | 1 | PNP     |
| Biological Process | GO:0075044 | positive regulation by symbiont of host autophagy                                  | 1/2279 | 7/18866 | 0.5939779 | 0.7442152 | 0.6733924 | 1 | ULK1    |
| Biological Process | GO:0075071 | modulation by symbiont of host autophagy                                           | 1/2279 | 7/18866 | 0.5939779 | 0.7442152 | 0.6733924 | 1 | ULK1    |
| Biological Process | GO:0086028 | bundle of His cell to Purkinje myocyte signaling                                   | 1/2279 | 7/18866 | 0.5939779 | 0.7442152 | 0.6733924 | 1 | GJA5    |
| Biological Process | GO:0086036 | regulation of cardiac muscle cell membrane potential                               | 1/2279 | 7/18866 | 0.5939779 | 0.7442152 | 0.6733924 | 1 | FXD1    |

|                    |            |                                                                       |        |         |           |           |           |   |          |
|--------------------|------------|-----------------------------------------------------------------------|--------|---------|-----------|-----------|-----------|---|----------|
| Biological Process | GO:0086042 | cardiac muscle cell-cardiac muscle cell adhesion                      | 1/2279 | 7/18866 | 0.5939779 | 0.7442152 | 0.6733924 | 1 | JUP      |
| Biological Process | GO:0086043 | bundle of His cell action potential                                   | 1/2279 | 7/18866 | 0.5939779 | 0.7442152 | 0.6733924 | 1 | GJA5     |
| Biological Process | GO:0086100 | endothelin receptor signaling pathway                                 | 1/2279 | 7/18866 | 0.5939779 | 0.7442152 | 0.6733924 | 1 | BCAR3    |
| Biological Process | GO:0090166 | Golgi disassembly                                                     | 1/2279 | 7/18866 | 0.5939779 | 0.7442152 | 0.6733924 | 1 | STX5     |
| Biological Process | GO:0090219 | negative regulation of lipid kinase activity                          | 1/2279 | 7/18866 | 0.5939779 | 0.7442152 | 0.6733924 | 1 | MIR138-2 |
| Biological Process | GO:0090232 | positive regulation of spindle checkpoint                             | 1/2279 | 7/18866 | 0.5939779 | 0.7442152 | 0.6733924 | 1 | PCID2    |
| Biological Process | GO:0090267 | positive regulation of mitotic cell cycle spindle assembly checkpoint | 1/2279 | 7/18866 | 0.5939779 | 0.7442152 | 0.6733924 | 1 | PCID2    |
| Biological Process | GO:0097065 | anterior head development                                             | 1/2279 | 7/18866 | 0.5939779 | 0.7442152 | 0.6733924 | 1 | SSBP3    |
| Biological Process | GO:0097187 | dentinogenesis                                                        | 1/2279 | 7/18866 | 0.5939779 | 0.7442152 | 0.6733924 | 1 | FAM20C   |

|                    |            |                                                                            |        |         |           |           |           |   |       |
|--------------------|------------|----------------------------------------------------------------------------|--------|---------|-----------|-----------|-----------|---|-------|
| Biological Process | GO:0097577 | sequestering of iron ion                                                   | 1/2279 | 7/18866 | 0.5939779 | 0.7442152 | 0.6733924 | 1 | LCN2  |
| Biological Process | GO:0098902 | regulation of membrane depolarization during action potential              | 1/2279 | 7/18866 | 0.5939779 | 0.7442152 | 0.6733924 | 1 | GJA5  |
| Biological Process | GO:0098914 | membrane repolarization during atrial cardiac muscle cell action potential | 1/2279 | 7/18866 | 0.5939779 | 0.7442152 | 0.6733924 | 1 | KCNQ1 |
| Biological Process | GO:0098943 | neurotransmitter receptor transport, postsynaptic endosome to lysosome     | 1/2279 | 7/18866 | 0.5939779 | 0.7442152 | 0.6733924 | 1 | AP3D1 |
| Biological Process | GO:0106014 | regulation of inflammatory response to wounding                            | 1/2279 | 7/18866 | 0.5939779 | 0.7442152 | 0.6733924 | 1 | GRN   |
| Biological Process | GO:0110021 | cardiac muscle myoblast proliferation                                      | 1/2279 | 7/18866 | 0.5939779 | 0.7442152 | 0.6733924 | 1 | MEIS2 |
| Biological Process | GO:0110022 | regulation of cardiac muscle myoblast proliferation                        | 1/2279 | 7/18866 | 0.5939779 | 0.7442152 | 0.6733924 | 1 | MEIS2 |
| Biological Process | GO:0120041 | positive regulation of macrophage proliferation                            | 1/2279 | 7/18866 | 0.5939779 | 0.7442152 | 0.6733924 | 1 | CSF1R |
| Biological Process | GO:0140212 | regulation of long-chain fatty acid import into cell                       | 1/2279 | 7/18866 | 0.5939779 | 0.7442152 | 0.6733924 | 1 | THBS1 |

|                    |            |                                                                                                              |        |         |           |           |           |   |        |
|--------------------|------------|--------------------------------------------------------------------------------------------------------------|--------|---------|-----------|-----------|-----------|---|--------|
| Biological Process | GO:1900094 | regulation of transcription from RNA polymerase II promoter involved in determination of left/right symmetry | 1/2279 | 7/18866 | 0.5939779 | 0.7442152 | 0.6733924 | 1 | NODAL  |
| Biological Process | GO:1900107 | regulation of nodal signaling pathway                                                                        | 1/2279 | 7/18866 | 0.5939779 | 0.7442152 | 0.6733924 | 1 | NODAL  |
| Biological Process | GO:1900164 | nodal signaling pathway involved in determination of lateral mesoderm left/right asymmetry                   | 1/2279 | 7/18866 | 0.5939779 | 0.7442152 | 0.6733924 | 1 | NODAL  |
| Biological Process | GO:1900748 | positive regulation of vascular endothelial growth factor signaling pathway                                  | 1/2279 | 7/18866 | 0.5939779 | 0.7442152 | 0.6733924 | 1 | MYO1C  |
| Biological Process | GO:1901142 | insulin metabolic process                                                                                    | 1/2279 | 7/18866 | 0.5939779 | 0.7442152 | 0.6733924 | 1 | ERN1   |
| Biological Process | GO:1901165 | positive regulation of trophoblast cell migration                                                            | 1/2279 | 7/18866 | 0.5939779 | 0.7442152 | 0.6733924 | 1 | AGO2   |
| Biological Process | GO:1901321 | positive regulation of heart induction                                                                       | 1/2279 | 7/18866 | 0.5939779 | 0.7442152 | 0.6733924 | 1 | WNT11  |
| Biological Process | GO:1901509 | regulation of endothelial tube morphogenesis                                                                 | 1/2279 | 7/18866 | 0.5939779 | 0.7442152 | 0.6733924 | 1 | FOXP1  |
| Biological Process | GO:1902022 | L-lysine transport                                                                                           | 1/2279 | 7/18866 | 0.5939779 | 0.7442152 | 0.6733924 | 1 | SLC7A1 |



|                    |            |                                                                                    |        |         |           |           |           |   |        |
|--------------------|------------|------------------------------------------------------------------------------------|--------|---------|-----------|-----------|-----------|---|--------|
| Biological Process | GO:1902083 | negative regulation of peptidyl-cysteine S-nitrosylation                           | 1/2279 | 7/18866 | 0.5939779 | 0.7442152 | 0.6733924 | 1 | SNTA1  |
| Biological Process | GO:1903003 | positive regulation of protein deubiquitination                                    | 1/2279 | 7/18866 | 0.5939779 | 0.7442152 | 0.6733924 | 1 | TNIP1  |
| Biological Process | GO:1903059 | regulation of protein lipidation                                                   | 1/2279 | 7/18866 | 0.5939779 | 0.7442152 | 0.6733924 | 1 | SVIP   |
| Biological Process | GO:1903071 | positive regulation of ER-associated ubiquitin-dependent protein catabolic process | 1/2279 | 7/18866 | 0.5939779 | 0.7442152 | 0.6733924 | 1 | NFE2L2 |
| Biological Process | GO:1903367 | positive regulation of fear response                                               | 1/2279 | 7/18866 | 0.5939779 | 0.7442152 | 0.6733924 | 1 | MEF2C  |
| Biological Process | GO:1903401 | L-lysine transmembrane transport                                                   | 1/2279 | 7/18866 | 0.5939779 | 0.7442152 | 0.6733924 | 1 | SLC7A1 |
| Biological Process | GO:1903689 | regulation of wound healing, spreading of epidermal cells                          | 1/2279 | 7/18866 | 0.5939779 | 0.7442152 | 0.6733924 | 1 | RREB1  |
| Biological Process | GO:1904141 | positive regulation of microglial cell migration                                   | 1/2279 | 7/18866 | 0.5939779 | 0.7442152 | 0.6733924 | 1 | CX3CR1 |
| Biological Process | GO:1904732 | regulation of electron transfer activity                                           | 1/2279 | 7/18866 | 0.5939779 | 0.7442152 | 0.6733924 | 1 | SPHK2  |

|                    |            |                                                                                  |        |         |           |           |           |   |       |
|--------------------|------------|----------------------------------------------------------------------------------|--------|---------|-----------|-----------|-----------|---|-------|
| Biological Process | GO:1905150 | regulation of voltage-gated sodium channel activity                              | 1/2279 | 7/18866 | 0.5939779 | 0.7442152 | 0.6733924 | 1 | FGF14 |
| Biological Process | GO:1905206 | positive regulation of hydrogen peroxide-induced cell death                      | 1/2279 | 7/18866 | 0.5939779 | 0.7442152 | 0.6733924 | 1 | RIPK1 |
| Biological Process | GO:1990001 | inhibition of cysteine-type endopeptidase activity involved in apoptotic process | 1/2279 | 7/18866 | 0.5939779 | 0.7442152 | 0.6733924 | 1 | NOL3  |
| Biological Process | GO:1990048 | anterograde neuronal dense core vesicle transport                                | 1/2279 | 7/18866 | 0.5939779 | 0.7442152 | 0.6733924 | 1 | KIF1B |
| Biological Process | GO:1990791 | dorsal root ganglion development                                                 | 1/2279 | 7/18866 | 0.5939779 | 0.7442152 | 0.6733924 | 1 | NRP2  |
| Biological Process | GO:2000064 | regulation of cortisol biosynthetic process                                      | 1/2279 | 7/18866 | 0.5939779 | 0.7442152 | 0.6733924 | 1 | DGKQ  |
| Biological Process | GO:2000197 | regulation of ribonucleoprotein complex localization                             | 1/2279 | 7/18866 | 0.5939779 | 0.7442152 | 0.6733924 | 1 | SETD2 |
| Biological Process | GO:2000210 | positive regulation of anoikis                                                   | 1/2279 | 7/18866 | 0.5939779 | 0.7442152 | 0.6733924 | 1 | CHEK2 |
| Biological Process | GO:2000391 | positive regulation of neutrophil extravasation                                  | 1/2279 | 7/18866 | 0.5939779 | 0.7442152 | 0.6733924 | 1 | IL1R1 |

|                    |            |                                                            |        |          |           |           |           |   |  |                                                       |
|--------------------|------------|------------------------------------------------------------|--------|----------|-----------|-----------|-----------|---|--|-------------------------------------------------------|
| Biological Process | GO:2000848 | positive regulation of corticosteroid hormone secretion    | 1/2279 | 7/18866  | 0.5939779 | 0.7442152 | 0.6733924 | 1 |  | GHRL                                                  |
| Biological Process | GO:2000973 | regulation of pro-B cell differentiation                   | 1/2279 | 7/18866  | 0.5939779 | 0.7442152 | 0.6733924 | 1 |  | NOTCH1                                                |
| Biological Process | GO:2000987 | positive regulation of behavioral fear response            | 1/2279 | 7/18866  | 0.5939779 | 0.7442152 | 0.6733924 | 1 |  | MEF2C                                                 |
| Biological Process | GO:2001046 | positive regulation of integrin-mediated signaling pathway | 1/2279 | 7/18866  | 0.5939779 | 0.7442152 | 0.6733924 | 1 |  | LOXL3                                                 |
| Biological Process | GO:2001286 | regulation of caveolin-mediated endocytosis                | 1/2279 | 7/18866  | 0.5939779 | 0.7442152 | 0.6733924 | 1 |  | ITSN1                                                 |
| Biological Process | GO:0046785 | microtubule polymerization                                 | 9/2279 | 77/18866 | 0.5944337 | 0.7444918 | 0.6736426 | 9 |  | TBCD/DCTN1/CSNK1D/NDE1/NAV3/NUMA1/TPPP3/TUBGCP2/NDEL1 |
| Biological Process | GO:0048332 | mesoderm morphogenesis                                     | 9/2279 | 77/18866 | 0.5944337 | 0.7444918 | 0.6736426 | 9 |  | MIR145/SETD2/SMAD3/WNT11/PAX2/FGFR1/ITGB3/INHBA/NODAL |
| Biological Process | GO:0150076 | neuroinflammatory response                                 | 9/2279 | 77/18866 | 0.5944337 | 0.7444918 | 0.6736426 | 9 |  | AZU1/TNFRSF1B/TNF/FPR2/APP/CLU/PTPRC/GRN/ITGB2        |
| Biological Process | GO:0000729 | DNA double-strand break processing                         | 3/2279 | 25/18866 | 0.5960796 | 0.7449819 | 0.6740861 | 3 |  | BLM/RAD52/SLX4                                        |

|                    |            |                                                  |        |          |           |           |           |   |                      |
|--------------------|------------|--------------------------------------------------|--------|----------|-----------|-----------|-----------|---|----------------------|
| Biological Process | GO:0002092 | positive regulation of receptor internalization  | 3/2279 | 25/18866 | 0.5960796 | 0.7449819 | 0.6740861 | 3 | ANGPT1/ARRB1/ARRB2   |
| Biological Process | GO:0008334 | histone mRNA metabolic process                   | 3/2279 | 25/18866 | 0.5960796 | 0.7449819 | 0.6740861 | 3 | LSM1/CPSF3/SNRPD3    |
| Biological Process | GO:0010842 | retina layer formation                           | 3/2279 | 25/18866 | 0.5960796 | 0.7449819 | 0.6740861 | 3 | CRB1/HIPK2/SDK2      |
| Biological Process | GO:0019400 | alditol metabolic process                        | 3/2279 | 25/18866 | 0.5960796 | 0.7449819 | 0.6740861 | 3 | PGP/PCK2/DYSF        |
| Biological Process | GO:0032366 | intracellular sterol transport                   | 3/2279 | 25/18866 | 0.5960796 | 0.7449819 | 0.6740861 | 3 | ABCG1/ABCA1/NPC1     |
| Biological Process | GO:0032367 | intracellular cholesterol transport              | 3/2279 | 25/18866 | 0.5960796 | 0.7449819 | 0.6740861 | 3 | ABCG1/ABCA1/NPC1     |
| Biological Process | GO:0050687 | negative regulation of defense response to virus | 3/2279 | 25/18866 | 0.5960796 | 0.7449819 | 0.6740861 | 3 | TRIM38/SEC14L1/ILRUN |
| Biological Process | GO:0050927 | positive regulation of positive chemotaxis       | 3/2279 | 25/18866 | 0.5960796 | 0.7449819 | 0.6740861 | 3 | AZU1/IL16/SMAD3      |
| Biological Process | GO:0051307 | meiotic chromosome separation                    | 3/2279 | 25/18866 | 0.5960796 | 0.7449819 | 0.6740861 | 3 | EME1/MEIOB/SLX4      |

|                    |            |                                                                       |         |           |           |           |           |    |                                                                            |
|--------------------|------------|-----------------------------------------------------------------------|---------|-----------|-----------|-----------|-----------|----|----------------------------------------------------------------------------|
| Biological Process | GO:0051894 | positive regulation of focal adhesion assembly                        | 3/2279  | 25/18866  | 0.5960796 | 0.7449819 | 0.6740861 | 3  | ITGB1BP1/SMAD3/PTPRJ                                                       |
| Biological Process | GO:0061050 | regulation of cell growth involved in cardiac muscle cell development | 3/2279  | 25/18866  | 0.5960796 | 0.7449819 | 0.6740861 | 3  | CTDP1/MIR199A1/MIR199A2                                                    |
| Biological Process | GO:0061217 | regulation of mesonephros development                                 | 3/2279  | 25/18866  | 0.5960796 | 0.7449819 | 0.6740861 | 3  | TACSTD2/PAX2/HOXB7                                                         |
| Biological Process | GO:0062149 | detection of stimulus involved in sensory perception of pain          | 3/2279  | 25/18866  | 0.5960796 | 0.7449819 | 0.6740861 | 3  | SCN1A/ARRB2/NTRK1                                                          |
| Biological Process | GO:0097205 | renal filtration                                                      | 3/2279  | 25/18866  | 0.5960796 | 0.7449819 | 0.6740861 | 3  | GJAS/PDGFB/F2R                                                             |
| Biological Process | GO:2001026 | regulation of endothelial cell chemotaxis                             | 3/2279  | 25/18866  | 0.5960796 | 0.7449819 | 0.6740861 | 3  | THBS1/FGFR1/NOTCH1                                                         |
| Biological Process | GO:0006893 | Golgi to plasma membrane transport                                    | 7/2279  | 60/18866  | 0.5984382 | 0.7477329 | 0.6765753 | 7  | OSBPL5/KIF13A/DNM2/RAB31/VAMP5/CSK/VPS35L                                  |
| Biological Process | GO:0071806 | protein transmembrane transport                                       | 7/2279  | 60/18866  | 0.5984382 | 0.7477329 | 0.6765753 | 7  | PAM16/CLU/ABCA1/BCR/PEX26/TIMM44/RTN2                                      |
| Biological Process | GO:1901890 | positive regulation of cell junction assembly                         | 12/2279 | 103/18866 | 0.5986602 | 0.747912  | 0.6767373 | 12 | ITGB1BP1/SMAD3/EPHB3/SEMA4A/PTPRJ/SEMA4D/NRXN1/GHRL/NTRK1/FLOT1/CUX2/NPHP4 |

|                    |            |                                                        |         |          |           |           |           |    |                                                           |
|--------------------|------------|--------------------------------------------------------|---------|----------|-----------|-----------|-----------|----|-----------------------------------------------------------|
| Biological Process | GO:0050772 | positive regulation of axonogenesis                    | 10/2279 | 86/18866 | 0.6008477 | 0.7494336 | 0.6781141 | 10 | PLXNC1/ZEB2/DISC1/ILK/SEMA4D/CDH4/CYFIP1/TRPV2/NDEL1/DBNL |
| Biological Process | GO:0002756 | MyD88-independent toll-like receptor signaling pathway | 4/2279  | 34/18866 | 0.6009825 | 0.7494336 | 0.6781141 | 4  | RIPK1/PRKCE/UBE2D2/FADD                                   |
| Biological Process | GO:0006409 | tRNA export from nucleus                               | 4/2279  | 34/18866 | 0.6009825 | 0.7494336 | 0.6781141 | 4  | RAE1/NUP93/SEC13/NOL6                                     |
| Biological Process | GO:0007616 | long-term memory                                       | 4/2279  | 34/18866 | 0.6009825 | 0.7494336 | 0.6781141 | 4  | PRKCZ/SGK1/CPEB3/NTF4                                     |
| Biological Process | GO:0009452 | 7-methylguanosine RNA capping                          | 4/2279  | 34/18866 | 0.6009825 | 0.7494336 | 0.6781141 | 4  | POLR2F/CCNH/ERCC2/NCBP3                                   |
| Biological Process | GO:0010765 | positive regulation of sodium ion transport            | 4/2279  | 34/18866 | 0.6009825 | 0.7494336 | 0.6781141 | 4  | FXYD1/DNM2/TESC/ACTN4                                     |
| Biological Process | GO:0015865 | purine nucleotide transport                            | 4/2279  | 34/18866 | 0.6009825 | 0.7494336 | 0.6781141 | 4  | SLC25A25/SLC33A1/ABCC11/SLC25A1                           |
| Biological Process | GO:0032814 | regulation of natural killer cell activation           | 4/2279  | 34/18866 | 0.6009825 | 0.7494336 | 0.6781141 | 4  | FGR/DCAF15/HLA-F/PGLYRP1                                  |
| Biological Process | GO:0036260 | RNA capping                                            | 4/2279  | 34/18866 | 0.6009825 | 0.7494336 | 0.6781141 | 4  | POLR2F/CCNH/ERCC2/NCBP3                                   |

|                    |            |                                                                                                                                       |         |           |           |           |           |    |                                                                                                                                                                                                                                                       |
|--------------------|------------|---------------------------------------------------------------------------------------------------------------------------------------|---------|-----------|-----------|-----------|-----------|----|-------------------------------------------------------------------------------------------------------------------------------------------------------------------------------------------------------------------------------------------------------|
| Biological Process | GO:0042558 | pteridine-containing compound metabolic process                                                                                       | 4/2279  | 34/18866  | 0.6009825 | 0.7494336 | 0.6781141 | 4  | MTHFD1L/MTHFS/SLC19A1/MTHFD1                                                                                                                                                                                                                          |
| Biological Process | GO:0043516 | regulation of DNA damage response, signal transduction by p53 class mediator                                                          | 4/2279  | 34/18866  | 0.6009825 | 0.7494336 | 0.6781141 | 4  | SPRED2/ZNF385A/ANKRD1/MARCH7                                                                                                                                                                                                                          |
| Biological Process | GO:0046685 | response to arsenic-containing substance                                                                                              | 4/2279  | 34/18866  | 0.6009825 | 0.7494336 | 0.6781141 | 4  | ABCC2/FECH/GSTO1/GSTO2                                                                                                                                                                                                                                |
| Biological Process | GO:0051482 | positive regulation of cytosolic calcium ion concentration involved in phospholipase C-activating G protein-coupled signaling pathway | 4/2279  | 34/18866  | 0.6009825 | 0.7494336 | 0.6781141 | 4  | C3AR1/F2R/GPR4/AGTR1                                                                                                                                                                                                                                  |
| Biological Process | GO:0071431 | tRNA-containing ribonucleoprotein complex export from nucleus                                                                         | 4/2279  | 34/18866  | 0.6009825 | 0.7494336 | 0.6781141 | 4  | RAE1/NUP93/SEC13/NOL6                                                                                                                                                                                                                                 |
| Biological Process | GO:0071482 | cellular response to light stimulus                                                                                                   | 15/2279 | 129/18866 | 0.6033297 | 0.7521631 | 0.6805839 | 15 | PDE6A/MFAP4/CRB1/PIK3R1/BMF/CDC25A/AQP1/CREBBP/GRK7/RHNO1/NEDD4/ERCC1/CRIP1/POLD3/XPA                                                                                                                                                                 |
| Biological Process | GO:1901657 | glycosyl compound metabolic process                                                                                                   | 15/2279 | 129/18866 | 0.6033297 | 0.7521631 | 0.6805839 | 15 | CDA/DPYS/AMPD3/TJP2/MACROD1/TK2/UCK2/UPB1/PNP/GUK1/GMPR2/DHODH/TK1/IMPDH1/ACP3                                                                                                                                                                        |
| Biological Process | GO:0045930 | negative regulation of mitotic cell cycle                                                                                             | 40/2279 | 341/18866 | 0.6044213 | 0.7534175 | 0.6817189 | 40 | TRIM39/BLM/TIMP2/IL10/TFDP1/MAD1L1/FOXN3/TNKS/PRMT2/SMAD3/HUS1/TNF/FBXO7/E2F7/CTDSPL/PCBP4/EME1/RIPK1/NACC2/ZNF385A/TGFB1/ARID3A/OVOL1/PSMF1/GFI1B/TAOK3/ZFYVE19/MIR138-2/CLSPN/RB1/BCL2/PSMB7/CHEK2/BCL2L1/CDC14A/AURKAIP1/NAE1/PSMD13/PCID2/MAP3K20 |
| Biological Process | GO:0035914 | skeletal muscle cell differentiation                                                                                                  | 8/2279  | 69/18866  | 0.6046341 | 0.7534175 | 0.6817189 | 8  | MEF2D/PAX7/ARNTL/ANKRD2/RB1/NOTCH1/MEF2C/ANKRD1                                                                                                                                                                                                       |

|                    |            |                                                        |         |           |           |           |           |    |                                                                                                                                                                                                                  |
|--------------------|------------|--------------------------------------------------------|---------|-----------|-----------|-----------|-----------|----|------------------------------------------------------------------------------------------------------------------------------------------------------------------------------------------------------------------|
| Biological Process | GO:2000573 | positive regulation of DNA biosynthetic process        | 8/2279  | 69/18866  | 0.6046341 | 0.7534175 | 0.6817189 | 8  | TNKS/HMBOX1/GRHL2/PDGFB/ARRB2/PDGFRB/PARM1/CCT6A                                                                                                                                                                 |
| Biological Process | GO:0046822 | regulation of nucleocytoplasmic transport              | 13/2279 | 112/18866 | 0.604653  | 0.7534175 | 0.6817189 | 13 | ANGPT1/PIK3R1/SETD2/SMAD3/SUFU/JUP/TCF7L2/TGFB1/NF1/CDH1/CABP1/SP100/NEDD4                                                                                                                                       |
| Biological Process | GO:0006310 | DNA recombination                                      | 35/2279 | 299/18866 | 0.6061387 | 0.7550186 | 0.6831677 | 35 | BLM/SPIDR/IL10/BRCA2/RMI2/RAD52/SETD2/RTEL1/HUS1/NSMCE2/MCM5/RECQL5/EME1/MEIOB/IGHMBP2/UNG/TGFB1/AP5S1/RNF212/PTPRC/MCM2/RAD21L1/TCF3/DMC1/TP53BP1/RHNO1/ERCC1/TNFSF13/SLX4/RUVBL1/ERCC2/KLHDC3/PAXIP1/NSD2/FBH1 |
| Biological Process | GO:0003009 | skeletal muscle contraction                            | 5/2279  | 43/18866  | 0.6061764 | 0.7550186 | 0.6831677 | 5  | TNNT3/JSRP1/GSTO1/CASQ1/MB                                                                                                                                                                                       |
| Biological Process | GO:1901031 | regulation of response to reactive oxygen species      | 5/2279  | 43/18866  | 0.6061764 | 0.7550186 | 0.6831677 | 5  | IL10/TNF/RIPK1/NFE2L2/SIRT3                                                                                                                                                                                      |
| Biological Process | GO:0003073 | regulation of systemic arterial blood pressure         | 11/2279 | 95/18866  | 0.6068561 | 0.7557661 | 0.683844  | 11 | CTSZ/PDE4D/CTSG/SLC2A5/GJA5/KCNK6/PDGFB/F2R/AGTR1/HSD11B2/AOPEP                                                                                                                                                  |
| Biological Process | GO:0008406 | gonad development                                      | 26/2279 | 223/18866 | 0.6078206 | 0.7568681 | 0.6848411 | 26 | ARID5B/BRCA2/ARRB1/EIF2B5/CSDE1/FANCA/RDH10/RARA/SF1/BMPR1B/NCOA1/ARRB2/NTRK1/HOXA9/RAD21L1/BCL2/DMC1/SLIT3/UBE3A/CEBPB/PDGFRB/ERCC1/BCL2L1/HMGS1/NCOA4/INHBA                                                    |
| Biological Process | GO:0009994 | oocyte differentiation                                 | 6/2279  | 52/18866  | 0.6113652 | 0.7610823 | 0.6886543 | 6  | BRCA2/KMT2D/PPP2R1A/BCL2/DMC1/NPPC                                                                                                                                                                               |
| Biological Process | GO:0046580 | negative regulation of Ras protein signal transduction | 6/2279  | 52/18866  | 0.6113652 | 0.7610823 | 0.6886543 | 6  | TIMP2/KANK1/CUL3/RASA3/SYNGAP1/NF1                                                                                                                                                                               |



|                    |            |                                                                       |         |           |           |           |           |    |                                                                                                                                                                                                                                                                 |
|--------------------|------------|-----------------------------------------------------------------------|---------|-----------|-----------|-----------|-----------|----|-----------------------------------------------------------------------------------------------------------------------------------------------------------------------------------------------------------------------------------------------------------------|
| Biological Process | GO:1905330 | regulation of morphogenesis of an epithelium                          | 21/2279 | 181/18866 | 0.6127924 | 0.7627592 | 0.6901716 | 21 | RREB1/TACSTD2/RXRA/FOXP1/AP2A1/VANG1/TNF/PRICKLE2/WNT11/PAX2/FGFR1/SMURF1/PFN1/PSMF1/ARRB2/DAAM1/PSMB7/ANKRD6/LIF/HOXB7/PSMD13                                                                                                                                  |
| Biological Process | GO:0010948 | negative regulation of cell cycle process                             | 42/2279 | 359/18866 | 0.6129484 | 0.7628533 | 0.6902568 | 42 | TRIM39/BLM/CALR/FZR1/TFDP1/MAD1L1/FOXN3/TNKS/PRMT2/HUS1/FBXO7/E2F7/MGA/CTDSPL/PCBP4/EHMT2/EPC1/RIPK1/NACC2/ZNF385A/ARID3A/OVOL1/PHC3/C10orf99/PSMF1/GFI1B/TAOK3/ZFYVE19/MIR138-2/CLSPN/RB1/BCL2/E2F6/PSMB7/CHEK2/AURKAIP1/LIF/NAE1/PSMD13/PCID2/ABRAXAS1/BABAM2 |
| Biological Process | GO:0031960 | response to corticosteroid                                            | 19/2279 | 164/18866 | 0.6133344 | 0.7632338 | 0.690601  | 19 | IL10/AKAP13/TNF/ABCC2/SMYD3/ALPL/FECH/IL1RN/AQP1/AGXT/ENG/BCL2/NOTCH1/SLIT3/PCK2/FOXO1/PTPRU/HSD11B2/HNMT                                                                                                                                                       |
| Biological Process | GO:0051384 | response to glucocorticoid                                            | 17/2279 | 147/18866 | 0.6142598 | 0.7642853 | 0.6915525 | 17 | IL10/AKAP13/TNF/ABCC2/SMYD3/ALPL/FECH/IL1RN/AQP1/AGXT/BCL2/SLIT3/PCK2/FOXO1/PTPRU/HSD11B2/HNMT                                                                                                                                                                  |
| Biological Process | GO:0009410 | response to xenobiotic stimulus                                       | 15/2279 | 130/18866 | 0.6157085 | 0.7659842 | 0.6930897 | 15 | NR1I2/ACSL1/GGT1/LPO/ABCC2/AIP/SULT1A2/POR/MGST2/GUK1/RB1/GSTO1/EPHX1/GSTO2/MTARC1                                                                                                                                                                              |
| Biological Process | GO:0006890 | retrograde vesicle-mediated transport, Golgi to endoplasmic reticulum | 10/2279 | 87/18866  | 0.6159478 | 0.7659842 | 0.6930897 | 10 | LMAN2/ERGIC1/UVRAG/BICD2/HTT/NBAS/KIFAP3/TMED2/ARF5/PLPP3                                                                                                                                                                                                       |
| Biological Process | GO:0009144 | purine nucleoside triphosphate metabolic process                      | 10/2279 | 87/18866  | 0.6159478 | 0.7659842 | 0.6930897 | 10 | PRKAG2/AMPD3/ENO1/VPS9D1/SPHK2/TGFB1/GUK1/PKM/IMPDH1/ATP5PD                                                                                                                                                                                                     |
| Biological Process | GO:0051453 | regulation of intracellular pH                                        | 10/2279 | 87/18866  | 0.6159478 | 0.7659842 | 0.6930897 | 10 | TM9SF4/SLC11A1/ATP6V1B2/GRN/BCL2/ATP6V0B/UBE3A/CLN5/ATP6V0C/ATP6V1C1                                                                                                                                                                                            |
| Biological Process | GO:0021872 | forebrain generation of neurons                                       | 7/2279  | 61/18866  | 0.6164429 | 0.7661988 | 0.6932839 | 7  | NRP2/CSF1R/DISC1/ZMIZ1/FGFR1/RAPGEF2/INHBA                                                                                                                                                                                                                      |

|                    |            |                                                                                          |         |           |           |           |           |    |                                                                                                                                                                                                                                                                       |
|--------------------|------------|------------------------------------------------------------------------------------------|---------|-----------|-----------|-----------|-----------|----|-----------------------------------------------------------------------------------------------------------------------------------------------------------------------------------------------------------------------------------------------------------------------|
| Biological Process | GO:0031343 | positive regulation of cell killing                                                      | 7/2279  | 61/18866  | 0.6164429 | 0.7661988 | 0.6932839 | 7  | CD226/HLA-F/PTPRC/IL18RAP/CADM1/FADD/CYRIB                                                                                                                                                                                                                            |
| Biological Process | GO:0090342 | regulation of cell aging                                                                 | 7/2279  | 61/18866  | 0.6164429 | 0.7661988 | 0.6932839 | 7  | FZR1/MAP3K3/AKT3/VASH1/ARNTL/NEK6/FOXM1                                                                                                                                                                                                                               |
| Biological Process | GO:1902110 | positive regulation of mitochondrial membrane permeability involved in apoptotic process | 7/2279  | 61/18866  | 0.6164429 | 0.7661988 | 0.6932839 | 7  | TFDP1/YWHAH/BMF/YWHAZ/BCL2/TP53BP2/YWHAQ                                                                                                                                                                                                                              |
| Biological Process | GO:0031349 | positive regulation of defense response                                                  | 45/2279 | 385/18866 | 0.6178312 | 0.7678239 | 0.6947544 | 45 | NLRC4/S100A8/AIM2/IL16/ABCC1/CLEC4C/CCR2/TNF/CCL5/FPR2/TLR9/MNDA/RIPK1/CD226/HLA-F/TNFRSF1A/MUC12/F12/FCN1/TRIM5/MUC20/TNIP1/BCL10/MGST2/PSMF1/GRN/NLRC5/CREBBP/ETS1/IL18RAP/NOD2/PSMB7/MEF2C/GPR4/CEBPB/AGTR1/CADM1/RELA/FBXW11/HEXIM1/PARP9/FADD/PSMD13/STING1/CCN4 |
| Biological Process | GO:0021543 | pallium development                                                                      | 20/2279 | 173/18866 | 0.6183685 | 0.7682908 | 0.6951768 | 20 | MFSD2A/NDE1/BTBD3/ZEB2/EIF2B5/RTN4/DISC1/TRAPP9/HDAC1/ZMIZ1/RARA/NF1/KIRREL3/TACC3/WDR47/NCOA1/PLCB1/SLC2A1/NDEL1/NPY                                                                                                                                                 |
| Biological Process | GO:0050954 | sensory perception of mechanical stimulus                                                | 20/2279 | 173/18866 | 0.6183685 | 0.7682908 | 0.6951768 | 20 | KCNE1/HEXB/DRGX/CDH23/ATP2B2/ATP8B1/MBP/LRIG1/SCN1A/FGFR1/ESPN/WDR1/KCNQ1/NTRK1/TSPPEAR/SLC1A3/TMC1/CRYM/CDC14A/SPTBN4                                                                                                                                                |
| Biological Process | GO:0006959 | humoral immune response                                                                  | 44/2279 | 377/18866 | 0.6210881 | 0.7711559 | 0.6977692 | 44 | DEFA4/AZU1/ELANE/SLPI/PRTN3/S100A8/CTSG/MFAP4/C3AR1/LCN2/RNASE3/CD55/SLC11A1/TREM1/CCR2/TNF/SFTPD/IGHV6-1/SPON2/C5AR2/RBPJ/MASP1/PTPN6/CLU/TNFRSF21/PHB/FCN1/DEFB1/CD59/C1S/PGLYRP1/ST6GAL1/PTPRC/POU2F2/BCL2/NOTCH1/MEF2C/TRAF3IP2/CPB2/LTF/PGLYRP4/C1QB/BCL3/C1RL   |
| Biological Process | GO:0010972 | negative regulation of G2/M transition of mitotic cell cycle                             | 11/2279 | 96/18866  | 0.6211695 | 0.7711559 | 0.6977692 | 11 | TRIM39/BLM/FOXN3/HUS1/PSMF1/TAOK3/ZFYVE19/CLSPN/PSMB7/NAE1/PSMD13                                                                                                                                                                                                     |
| Biological Process | GO:0001756 | somitogenesis                                                                            | 8/2279  | 70/18866  | 0.621372  | 0.7711559 | 0.6977692 | 8  | SMAD3/ZEB2/DLL1/RBPJ/MIB1/NOTCH1/TMED2/ALDH1A2                                                                                                                                                                                                                        |

|                    |            |                                                 |         |           |           |           |           |    |                                                                                                                                                                                                    |
|--------------------|------------|-------------------------------------------------|---------|-----------|-----------|-----------|-----------|----|----------------------------------------------------------------------------------------------------------------------------------------------------------------------------------------------------|
| Biological Process | GO:0032370 | positive regulation of lipid transport          | 8/2279  | 70/18866  | 0.621372  | 0.7711559 | 0.6977692 | 8  | MYB/MAP2K6/ABCG1/ATP8A1/PLTP/NR1H2/GHRL/ABCA1                                                                                                                                                      |
| Biological Process | GO:0043270 | positive regulation of ion transport            | 33/2279 | 284/18866 | 0.6221741 | 0.7711559 | 0.6977692 | 33 | KCNE1/MAP2K6/FXYD1/MYLK/CCR2/DNM2/CCL5/ATP8A1/TESC/NOS1AP/ACTN4/P2RY6/SPHK2/HTR3A/HTT/PDGFB/KCNQ1/ARRB2/GSTO1/P2RX1/F2R/CEBPB/PDGFRB/ANO6/ANK2/PLCG1/P2RX5/TRPV2/PDZK1/CASQ1/FGF14/STIMATE/CRACR2A |
| Biological Process | GO:0008211 | glucocorticoid metabolic process                | 3/2279  | 26/18866  | 0.6234717 | 0.7711559 | 0.6977692 | 3  | YWHAH/DGKQ/HSD11B2                                                                                                                                                                                 |
| Biological Process | GO:0010884 | positive regulation of lipid storage            | 3/2279  | 26/18866  | 0.6234717 | 0.7711559 | 0.6977692 | 3  | EHD1/NR1H2/ACACB                                                                                                                                                                                   |
| Biological Process | GO:0018904 | ether metabolic process                         | 3/2279  | 26/18866  | 0.6234717 | 0.7711559 | 0.6977692 | 3  | CHPT1/EPHX1/PEDS1                                                                                                                                                                                  |
| Biological Process | GO:0022616 | DNA strand elongation                           | 3/2279  | 26/18866  | 0.6234717 | 0.7711559 | 0.6977692 | 3  | POLE/GINS3/POLD3                                                                                                                                                                                   |
| Biological Process | GO:0034453 | microtubule anchoring                           | 3/2279  | 26/18866  | 0.6234717 | 0.7711559 | 0.6977692 | 3  | DCTN1/BICD2/CEP350                                                                                                                                                                                 |
| Biological Process | GO:0035235 | ionotropic glutamate receptor signaling pathway | 3/2279  | 26/18866  | 0.6234717 | 0.7711559 | 0.6977692 | 3  | APP/GRIK4/GRID1                                                                                                                                                                                    |
| Biological Process | GO:0050926 | regulation of positive chemotaxis               | 3/2279  | 26/18866  | 0.6234717 | 0.7711559 | 0.6977692 | 3  | AZU1/IL16/SMAD3                                                                                                                                                                                    |

|                    |            |                                                                         |        |          |           |           |           |   |                        |
|--------------------|------------|-------------------------------------------------------------------------|--------|----------|-----------|-----------|-----------|---|------------------------|
| Biological Process | GO:0051156 | glucose 6-phosphate metabolic process                                   | 3/2279 | 26/18866 | 0.6234717 | 0.7711559 | 0.6977692 | 3 | HK1/PGAM1/HK2          |
| Biological Process | GO:0051873 | killing by host of symbiont cells                                       | 3/2279 | 26/18866 | 0.6234717 | 0.7711559 | 0.6977692 | 3 | AZU1/ELANE/CTSG        |
| Biological Process | GO:0060740 | prostate gland epithelium morphogenesis                                 | 3/2279 | 26/18866 | 0.6234717 | 0.7711559 | 0.6977692 | 3 | RXRA/RARG/NOTCH1       |
| Biological Process | GO:0070911 | global genome nucleotide-excision repair                                | 3/2279 | 26/18866 | 0.6234717 | 0.7711559 | 0.6977692 | 3 | ERCC1/XPA/ERCC2        |
| Biological Process | GO:0072273 | metanephric nephron morphogenesis                                       | 3/2279 | 26/18866 | 0.6234717 | 0.7711559 | 0.6977692 | 3 | PAX2/PDGFRB/LIF        |
| Biological Process | GO:0097066 | response to thyroid hormone                                             | 3/2279 | 26/18866 | 0.6234717 | 0.7711559 | 0.6977692 | 3 | CTSH/CAB39/CTSB        |
| Biological Process | GO:1901018 | positive regulation of potassium ion transmembrane transporter activity | 3/2279 | 26/18866 | 0.6234717 | 0.7711559 | 0.6977692 | 3 | DNM2/NOS1AP/ANK2       |
| Biological Process | GO:1904754 | positive regulation of vascular associated smooth muscle cell migration | 3/2279 | 26/18866 | 0.6234717 | 0.7711559 | 0.6977692 | 3 | SSH1/MIR143/PDGFB      |
| Biological Process | GO:0003203 | endocardial cushion morphogenesis                                       | 4/2279 | 35/18866 | 0.6245523 | 0.7711559 | 0.6977692 | 4 | TGFBR2/RBPJ/ENG/NOTCH1 |

|                    |            |                                                     |         |           |           |           |           |    |                                                                                                    |
|--------------------|------------|-----------------------------------------------------|---------|-----------|-----------|-----------|-----------|----|----------------------------------------------------------------------------------------------------|
| Biological Process | GO:0006739 | NADP metabolic process                              | 4/2279  | 35/18866  | 0.6245523 | 0.7711559 | 0.6977692 | 4  | NADK/KCNAB2/PGAM1/TP53I3                                                                           |
| Biological Process | GO:0016486 | peptide hormone processing                          | 4/2279  | 35/18866  | 0.6245523 | 0.7711559 | 0.6977692 | 4  | CTSZ/CTSG/PCSK6/AOPEP                                                                              |
| Biological Process | GO:0019362 | pyridine nucleotide metabolic process               | 4/2279  | 35/18866  | 0.6245523 | 0.7711559 | 0.6977692 | 4  | NADK/NMNAT3/PARP10/PARP9                                                                           |
| Biological Process | GO:0033687 | osteoblast proliferation                            | 4/2279  | 35/18866  | 0.6245523 | 0.7711559 | 0.6977692 | 4  | SMAD3/MIR138-2/BCL2/LTF                                                                            |
| Biological Process | GO:0045922 | negative regulation of fatty acid metabolic process | 4/2279  | 35/18866  | 0.6245523 | 0.7711559 | 0.6977692 | 4  | MFSD2A/ACACB/WDTC1/ACADVL                                                                          |
| Biological Process | GO:0046496 | nicotinamide nucleotide metabolic process           | 4/2279  | 35/18866  | 0.6245523 | 0.7711559 | 0.6977692 | 4  | NADK/NMNAT3/PARP10/PARP9                                                                           |
| Biological Process | GO:0050779 | RNA destabilization                                 | 4/2279  | 35/18866  | 0.6245523 | 0.7711559 | 0.6977692 | 4  | TNFRSF1B/ZC3H12D/CPEB3/FTO                                                                         |
| Biological Process | GO:0140448 | signaling receptor ligand precursor processing      | 4/2279  | 35/18866  | 0.6245523 | 0.7711559 | 0.6977692 | 4  | CTSZ/CTSG/PCSK6/AOPEP                                                                              |
| Biological Process | GO:2001251 | negative regulation of chromosome organization      | 17/2279 | 148/18866 | 0.6257665 | 0.7711559 | 0.6977692 | 17 | MAD1L1/TNKS/SKI/RTEL1/OTUB2/SPHK2/CTBP1/KDM4C/MCM2/SMG6/OTUB1/DNMT1/PIH1D1/TRIP12/ERCC1/SLX4/PCID2 |

|                    |            |                                                                   |        |          |           |           |           |   |                                                        |
|--------------------|------------|-------------------------------------------------------------------|--------|----------|-----------|-----------|-----------|---|--------------------------------------------------------|
| Biological Process | GO:0009205 | purine ribonucleoside triphosphate metabolic process              | 9/2279 | 79/18866 | 0.6261423 | 0.7711559 | 0.6977692 | 9 | PRKAG2/AMPD3/ENO1/VPS9D1/SPHK2/TGFB1/PKM/IMPDH1/ATP5PD |
| Biological Process | GO:0030104 | water homeostasis                                                 | 9/2279 | 79/18866 | 0.6261423 | 0.7711559 | 0.6977692 | 9 | ADCY2/PRKAR1B/ADCY9/AQP1/ADCY4/AQP3/FA2H/ANXA7/AQP9    |
| Biological Process | GO:0002483 | antigen processing and presentation of endogenous peptide antigen | 2/2279 | 17/18866 | 0.626275  | 0.7711559 | 0.6977692 | 2 | HLA-C/HLA-F                                            |
| Biological Process | GO:0006266 | DNA ligation                                                      | 2/2279 | 17/18866 | 0.626275  | 0.7711559 | 0.6977692 | 2 | TFIP11/PAXX                                            |
| Biological Process | GO:0006474 | N-terminal protein amino acid acetylation                         | 2/2279 | 17/18866 | 0.626275  | 0.7711559 | 0.6977692 | 2 | CREBBP/NAA16                                           |
| Biological Process | GO:0007096 | regulation of exit from mitosis                                   | 2/2279 | 17/18866 | 0.626275  | 0.7711559 | 0.6977692 | 2 | CDC45/CDC14A                                           |
| Biological Process | GO:0007250 | activation of NF-kappaB-inducing kinase activity                  | 2/2279 | 17/18866 | 0.626275  | 0.7711559 | 0.6977692 | 2 | CHI3L1/TRAF2                                           |
| Biological Process | GO:0008340 | determination of adult lifespan                                   | 2/2279 | 17/18866 | 0.626275  | 0.7711559 | 0.6977692 | 2 | INPP5D/PRDM2                                           |
| Biological Process | GO:0009299 | mRNA transcription                                                | 2/2279 | 17/18866 | 0.626275  | 0.7711559 | 0.6977692 | 2 | HIPK3/SREBF1                                           |

|                    |            |                                                                                   |        |          |          |           |           |   |             |
|--------------------|------------|-----------------------------------------------------------------------------------|--------|----------|----------|-----------|-----------|---|-------------|
| Biological Process | GO:0010715 | regulation of extracellular matrix disassembly                                    | 2/2279 | 17/18866 | 0.626275 | 0.7711559 | 0.6977692 | 2 | TGFB1/ETS1  |
| Biological Process | GO:0014067 | negative regulation of phosphatidylinositol 3-kinase signaling                    | 2/2279 | 17/18866 | 0.626275 | 0.7711559 | 0.6977692 | 2 | INPP5E/TSC2 |
| Biological Process | GO:0016074 | snoRNA metabolic process                                                          | 2/2279 | 17/18866 | 0.626275 | 0.7711559 | 0.6977692 | 2 | EXOSC2/FBL  |
| Biological Process | GO:0019377 | glycolipid catabolic process                                                      | 2/2279 | 17/18866 | 0.626275 | 0.7711559 | 0.6977692 | 2 | HEXB/GALC   |
| Biological Process | GO:0019885 | antigen processing and presentation of endogenous peptide antigen via MHC class I | 2/2279 | 17/18866 | 0.626275 | 0.7711559 | 0.6977692 | 2 | HLA-C/HLA-F |
| Biological Process | GO:0021514 | ventral spinal cord interneuron differentiation                                   | 2/2279 | 17/18866 | 0.626275 | 0.7711559 | 0.6977692 | 2 | SUFU/LMO4   |
| Biological Process | GO:0032966 | negative regulation of collagen biosynthetic process                              | 2/2279 | 17/18866 | 0.626275 | 0.7711559 | 0.6977692 | 2 | PPARG/NPPC  |
| Biological Process | GO:0033262 | regulation of nuclear cell cycle DNA replication                                  | 2/2279 | 17/18866 | 0.626275 | 0.7711559 | 0.6977692 | 2 | FGFR1/CHEK2 |
| Biological Process | GO:0033631 | cell-cell adhesion mediated by integrin                                           | 2/2279 | 17/18866 | 0.626275 | 0.7711559 | 0.6977692 | 2 | CCL5/PLPP3  |

|                    |            |                                                        |        |          |          |           |           |   |                 |
|--------------------|------------|--------------------------------------------------------|--------|----------|----------|-----------|-----------|---|-----------------|
| Biological Process | GO:0034384 | high-density lipoprotein particle clearance            | 2/2279 | 17/18866 | 0.626275 | 0.7711559 | 0.6977692 | 2 | GPLD1/HDLBP     |
| Biological Process | GO:0035461 | vitamin transmembrane transport                        | 2/2279 | 17/18866 | 0.626275 | 0.7711559 | 0.6977692 | 2 | SLC19A1/SLC23A1 |
| Biological Process | GO:0038092 | nodal signaling pathway                                | 2/2279 | 17/18866 | 0.626275 | 0.7711559 | 0.6977692 | 2 | SMAD3/NODAL     |
| Biological Process | GO:0042448 | progesterone metabolic process                         | 2/2279 | 17/18866 | 0.626275 | 0.7711559 | 0.6977692 | 2 | DHRS9/DGKQ      |
| Biological Process | GO:0043649 | dicarboxylic acid catabolic process                    | 2/2279 | 17/18866 | 0.626275 | 0.7711559 | 0.6977692 | 2 | MTHFS/ACSF3     |
| Biological Process | GO:0046068 | cGMP metabolic process                                 | 2/2279 | 17/18866 | 0.626275 | 0.7711559 | 0.6977692 | 2 | PDE9A/NPPC      |
| Biological Process | GO:0048385 | regulation of retinoic acid receptor signaling pathway | 2/2279 | 17/18866 | 0.626275 | 0.7711559 | 0.6977692 | 2 | CALR/CTBP2      |
| Biological Process | GO:0060644 | mammary gland epithelial cell differentiation          | 2/2279 | 17/18866 | 0.626275 | 0.7711559 | 0.6977692 | 2 | LBH/CEBPB       |
| Biological Process | GO:0061158 | 3'-UTR-mediated mRNA destabilization                   | 2/2279 | 17/18866 | 0.626275 | 0.7711559 | 0.6977692 | 2 | ZC3H12D/CPEB3   |



|                    |            |                                                               |        |          |          |           |           |   |                 |
|--------------------|------------|---------------------------------------------------------------|--------|----------|----------|-----------|-----------|---|-----------------|
| Biological Process | GO:0070206 | protein trimerization                                         | 2/2279 | 17/18866 | 0.626275 | 0.7711559 | 0.6977692 | 2 | SLC1A5/SLC1A2   |
| Biological Process | GO:0070242 | thymocyte apoptotic process                                   | 2/2279 | 17/18866 | 0.626275 | 0.7711559 | 0.6977692 | 2 | PTCRA/ZC3H8     |
| Biological Process | GO:0070875 | positive regulation of glycogen metabolic process             | 2/2279 | 17/18866 | 0.626275 | 0.7711559 | 0.6977692 | 2 | DYRK2/ESRRB     |
| Biological Process | GO:0090185 | negative regulation of kidney development                     | 2/2279 | 17/18866 | 0.626275 | 0.7711559 | 0.6977692 | 2 | TACSTD2/PAX2    |
| Biological Process | GO:0097067 | cellular response to thyroid hormone stimulus                 | 2/2279 | 17/18866 | 0.626275 | 0.7711559 | 0.6977692 | 2 | CTSH/CTSB       |
| Biological Process | GO:0099509 | regulation of presynaptic cytosolic calcium ion concentration | 2/2279 | 17/18866 | 0.626275 | 0.7711559 | 0.6977692 | 2 | ATP2B2/P2RX1    |
| Biological Process | GO:1901317 | regulation of flagellated sperm motility                      | 2/2279 | 17/18866 | 0.626275 | 0.7711559 | 0.6977692 | 2 | RNASE10/DEFB1   |
| Biological Process | GO:1902358 | sulfate transmembrane transport                               | 2/2279 | 17/18866 | 0.626275 | 0.7711559 | 0.6977692 | 2 | SLC13A4/SLC26A1 |
| Biological Process | GO:1904355 | positive regulation of telomere capping                       | 2/2279 | 17/18866 | 0.626275 | 0.7711559 | 0.6977692 | 2 | TNKS/RTKL1      |

|                    |            |                                                                  |         |           |           |           |           |    |                                                                                                                                                  |                                    |
|--------------------|------------|------------------------------------------------------------------|---------|-----------|-----------|-----------|-----------|----|--------------------------------------------------------------------------------------------------------------------------------------------------|------------------------------------|
| Biological Process | GO:1904948 | midbrain dopaminergic neuron differentiation                     | 2/2279  | 17/18866  | 0.626275  | 0.7711559 | 0.6977692 | 2  |                                                                                                                                                  | CSNK1D/CSNK1E                      |
| Biological Process | GO:1905331 | negative regulation of morphogenesis of an epithelium            | 2/2279  | 17/18866  | 0.626275  | 0.7711559 | 0.6977692 | 2  |                                                                                                                                                  | TACSTD2/TNF                        |
| Biological Process | GO:2000136 | regulation of cell proliferation involved in heart morphogenesis | 2/2279  | 17/18866  | 0.626275  | 0.7711559 | 0.6977692 | 2  |                                                                                                                                                  | RBPJ/NOTCH1                        |
| Biological Process | GO:0071456 | cellular response to hypoxia                                     | 24/2279 | 208/18866 | 0.6271168 | 0.7716275 | 0.698196  | 24 | P4HB/ENO1/MIR140/NDRG1/SLC8A1/HIPK2/RBPJ/LIMD1/AQP1/PSMF1/CREBBP/NOL3/NFE2L2/BCL2/PSMB7/NOTCH1/AQP3/EPAS1/PRKCE/ANKRD1/SLC29A1/BACH1/PSMD13/PRKA | A1                                 |
| Biological Process | GO:0021575 | hindbrain morphogenesis                                          | 5/2279  | 44/18866  | 0.6271453 | 0.7716275 | 0.698196  | 5  |                                                                                                                                                  | DLL1/TTC21B/HES3/TLL1/COQ8B        |
| Biological Process | GO:0031670 | cellular response to nutrient                                    | 5/2279  | 44/18866  | 0.6271453 | 0.7716275 | 0.698196  | 5  |                                                                                                                                                  | PPARG/TNKS/VDR/NCOA1/USF2          |
| Biological Process | GO:0044091 | membrane biogenesis                                              | 5/2279  | 44/18866  | 0.6271453 | 0.7716275 | 0.698196  | 5  |                                                                                                                                                  | PACSIN2/NRXN1/NRXN2/MIR138-2/FLOT1 |
| Biological Process | GO:0090503 | RNA phosphodiester bond hydrolysis, exonucleolytic               | 5/2279  | 44/18866  | 0.6271453 | 0.7716275 | 0.698196  | 5  |                                                                                                                                                  | EXOSC2/ERI3/DIS3L2/TOE1/ISG20      |
| Biological Process | GO:1902667 | regulation of axon guidance                                      | 5/2279  | 44/18866  | 0.6271453 | 0.7716275 | 0.698196  | 5  |                                                                                                                                                  | SEMA6B/SEMA4A/SEMA4B/SEMA4D/ZSWIM5 |

|                    |            |                                                                |         |           |           |           |           |    |                                                                                                                                         |
|--------------------|------------|----------------------------------------------------------------|---------|-----------|-----------|-----------|-----------|----|-----------------------------------------------------------------------------------------------------------------------------------------|
| Biological Process | GO:0048167 | regulation of synaptic plasticity                              | 22/2279 | 191/18866 | 0.6278705 | 0.7724197 | 0.6989128 | 22 | PRKCZ/SSH1/SORCS2/CREB1/YWHAH/BAIAP2/ZDHHC2/APP/AKAP5/SYNGAP1/RAPGEF2/HRH1/RARA/NF1/CPEB3/SIPA1L1/MAP1A/MEF2C/SHANK2/CX3CR1/SYNPO/FGF14 |
| Biological Process | GO:0032200 | telomere organization                                          | 20/2279 | 174/18866 | 0.6289608 | 0.7736609 | 0.7000359 | 20 | BLM/TNKS/POLE/BRCA2/HMBOX1/RTEL1/HUS1/NSMCE2/YLPM1/POLA2/SMARCAL1/SMG6/SP100/ERCC1/SLX4/POLD3/CCT6A/POLE4/TFIP11/H3C1                   |
| Biological Process | GO:0000731 | DNA synthesis involved in DNA repair                           | 6/2279  | 53/18866  | 0.6304146 | 0.7753488 | 0.7015631 | 6  | POLE/WRNIP1/TEX12/POLD3/PARP10/POLI                                                                                                     |
| Biological Process | GO:1990748 | cellular detoxification                                        | 13/2279 | 114/18866 | 0.6309207 | 0.7758708 | 0.7020354 | 13 | MPO/LPO/TNF/HBB/MGST2/CAT/NFE2L2/NXN/GSTO1/TXNRD2/GSTO2/SIRT3/PRXL2B                                                                    |
| Biological Process | GO:0010676 | positive regulation of cellular carbohydrate metabolic process | 7/2279  | 62/18866  | 0.6339991 | 0.775915  | 0.7020754 | 7  | GPLD1/P2RY6/HRH1/DYRK2/ESRRB/PRKE/FOXO1                                                                                                 |
| Biological Process | GO:0071384 | cellular response to corticosteroid stimulus                   | 7/2279  | 62/18866  | 0.6339991 | 0.775915  | 0.7020754 | 7  | AKAP13/ABCC2/SMYD3/FECH/AQP1/PCK2/FOXO1                                                                                                 |
| Biological Process | GO:0036473 | cell death in response to oxidative stress                     | 11/2279 | 97/18866  | 0.6352167 | 0.775915  | 0.7020754 | 11 | P4HB/IL10/ZNF622/FBXO7/RIPK1/STK24/NOL3/NFE2L2/BCL2/BAG5/PRKN                                                                           |
| Biological Process | GO:1902476 | chloride transmembrane transport                               | 11/2279 | 97/18866  | 0.6352167 | 0.775915  | 0.7020754 | 11 | CLCN6/FXYD1/ANO7/SLC26A1/SLC1A3/ANO10/ANO6/SLC12A1/ANO8/SLC12A7/PAC1                                                                    |
| Biological Process | GO:0014823 | response to activity                                           | 8/2279  | 71/18866  | 0.6377226 | 0.775915  | 0.7020754 | 8  | SLC25A25/IL10/CREB1/COL4A2/CAB39/CAT/FIS1/PRKAA1                                                                                        |

|                    |            |                                                                 |         |           |           |          |           |    |                                                                                                                                                                      |
|--------------------|------------|-----------------------------------------------------------------|---------|-----------|-----------|----------|-----------|----|----------------------------------------------------------------------------------------------------------------------------------------------------------------------|
| Biological Process | GO:0033692 | cellular polysaccharide biosynthetic process                    | 8/2279  | 71/18866  | 0.6377226 | 0.775915 | 0.7020754 | 8  | CSGALNACT1/NDST1/DYRK2/PPP1CB/ESRRB/PER2/HAS3/B3GNT2                                                                                                                 |
| Biological Process | GO:0042531 | positive regulation of tyrosine phosphorylation of STAT protein | 8/2279  | 71/18866  | 0.6377226 | 0.775915 | 0.7020754 | 8  | TNF/CCL5/CSF1R/TNFRSF1A/IL6R/CRLF1/PARP9/LIF                                                                                                                         |
| Biological Process | GO:0061180 | mammary gland epithelium development                            | 8/2279  | 71/18866  | 0.6377226 | 0.775915 | 0.7020754 | 8  | RREB1/BRCA2/LRP5L/VDR/CSF1R/LBH/RTN4/CEBPB                                                                                                                           |
| Biological Process | GO:0007218 | neuropeptide signaling pathway                                  | 12/2279 | 106/18866 | 0.6395352 | 0.775915 | 0.7020754 | 12 | SORL1/SORCS2/PNOC/CRCP/LTB4R2/RAPGEF2/SORT1/TYRO3/NPFFR1/NPY/LTB4R/PRLHR                                                                                             |
| Biological Process | GO:0071453 | cellular response to oxygen levels                              | 27/2279 | 235/18866 | 0.6400593 | 0.775915 | 0.7020754 | 27 | P4HB/ENO1/PPARG/MIR140/NDRG1/SLC8A1/HIPK2/RBPJ/LIMD1/AQP1/PSMF1/CREBBP/NOL3/NFE2L2/BCL2/PSMB7/NOTCH1/AQP3/DNM1L/EPAS1/PRKCE/FOXO1/ANKRD1/SLC29A1/BACH1/PSMD13/PRKAA1 |
| Biological Process | GO:0036294 | cellular response to decreased oxygen levels                    | 25/2279 | 218/18866 | 0.640937  | 0.775915 | 0.7020754 | 25 | P4HB/ENO1/MIR140/NDRG1/SLC8A1/HIPK2/RBPJ/LIMD1/AQP1/PSMF1/CREBBP/NOL3/NFE2L2/BCL2/PSMB7/NOTCH1/AQP3/DNM1L/EPAS1/PRKCE/ANKRD1/SLC29A1/BACH1/PSMD13/PRKAA1             |
| Biological Process | GO:0050729 | positive regulation of inflammatory response                    | 18/2279 | 158/18866 | 0.641458  | 0.775915 | 0.7020754 | 18 | S100A8/IL16/ABCC1/CCR2/TNF/TLR9/RIPK1/TNFRSF1A/F12/TNIP1/MGST2/GRN/ETS1/NOD2/GPR4/CEBPB/AGTR1/CCN4                                                                   |
| Biological Process | GO:2000300 | regulation of synaptic vesicle exocytosis                       | 9/2279  | 80/18866  | 0.6414921 | 0.775915 | 0.7020754 | 9  | RAP1B/GIT1/APBA2/PRKCB/VPS18/CHRM2/P2RX1/DNM1L/DTNBP1                                                                                                                |
| Biological Process | GO:0001763 | morphogenesis of a branching structure                          | 23/2279 | 201/18866 | 0.6421089 | 0.775915 | 0.7020754 | 23 | CTSZ/TACSTD2/RXRA/IL10/LRP5L/VDR/SETD2/SPINT2/TNF/BCL11A/RTN4/TGFBR2/CTSH/ILK/PAX2/FGFR1/RDH10/GRHL2/ENG/BCL2/NOTCH1/NOTCH4/HOXB7                                    |

|                    |            |                                                                                            |        |         |           |          |           |   |        |
|--------------------|------------|--------------------------------------------------------------------------------------------|--------|---------|-----------|----------|-----------|---|--------|
| Biological Process | GO:0000820 | regulation of glutamine family amino acid metabolic process                                | 1/2279 | 8/18866 | 0.6430433 | 0.775915 | 0.7020754 | 1 | SLC7A7 |
| Biological Process | GO:0001547 | antral ovarian follicle growth                                                             | 1/2279 | 8/18866 | 0.6430433 | 0.775915 | 0.7020754 | 1 | BMPR1B |
| Biological Process | GO:0001955 | blood vessel maturation                                                                    | 1/2279 | 8/18866 | 0.6430433 | 0.775915 | 0.7020754 | 1 | LYL1   |
| Biological Process | GO:0002016 | regulation of blood volume by renin-angiotensin                                            | 1/2279 | 8/18866 | 0.6430433 | 0.775915 | 0.7020754 | 1 | AGTR1  |
| Biological Process | GO:0002072 | optic cup morphogenesis involved in camera-type eye development                            | 1/2279 | 8/18866 | 0.6430433 | 0.775915 | 0.7020754 | 1 | PAX2   |
| Biological Process | GO:0002420 | natural killer cell mediated cytotoxicity directed against tumor cell target               | 1/2279 | 8/18866 | 0.6430433 | 0.775915 | 0.7020754 | 1 | CD226  |
| Biological Process | GO:0002765 | immune response-inhibiting signal transduction                                             | 1/2279 | 8/18866 | 0.6430433 | 0.775915 | 0.7020754 | 1 | CD33   |
| Biological Process | GO:0002858 | regulation of natural killer cell mediated cytotoxicity directed against tumor cell target | 1/2279 | 8/18866 | 0.6430433 | 0.775915 | 0.7020754 | 1 | CD226  |
| Biological Process | GO:0003140 | determination of left/right asymmetry in lateral mesoderm                                  | 1/2279 | 8/18866 | 0.6430433 | 0.775915 | 0.7020754 | 1 | NODAL  |

|                    |            |                                                                                         |        |         |           |          |           |   |         |
|--------------------|------------|-----------------------------------------------------------------------------------------|--------|---------|-----------|----------|-----------|---|---------|
| Biological Process | GO:0006152 | purine nucleoside catabolic process                                                     | 1/2279 | 8/18866 | 0.6430433 | 0.775915 | 0.7020754 | 1 | PNP     |
| Biological Process | GO:0006551 | leucine metabolic process                                                               | 1/2279 | 8/18866 | 0.6430433 | 0.775915 | 0.7020754 | 1 | HMGCL   |
| Biological Process | GO:0006776 | vitamin A metabolic process                                                             | 1/2279 | 8/18866 | 0.6430433 | 0.775915 | 0.7020754 | 1 | ALDH1A2 |
| Biological Process | GO:0006863 | purine nucleobase transport                                                             | 1/2279 | 8/18866 | 0.6430433 | 0.775915 | 0.7020754 | 1 | AQP9    |
| Biological Process | GO:0007144 | female meiosis I                                                                        | 1/2279 | 8/18866 | 0.6430433 | 0.775915 | 0.7020754 | 1 | MEIOB   |
| Biological Process | GO:0007197 | adenylate cyclase-inhibiting G protein-coupled acetylcholine receptor signaling pathway | 1/2279 | 8/18866 | 0.6430433 | 0.775915 | 0.7020754 | 1 | CHRM2   |
| Biological Process | GO:0007253 | cytoplasmic sequestering of NF-kappaB                                                   | 1/2279 | 8/18866 | 0.6430433 | 0.775915 | 0.7020754 | 1 | IL10    |
| Biological Process | GO:0007341 | penetration of zona pellucida                                                           | 1/2279 | 8/18866 | 0.6430433 | 0.775915 | 0.7020754 | 1 | HEXB    |
| Biological Process | GO:0008216 | spermidine metabolic process                                                            | 1/2279 | 8/18866 | 0.6430433 | 0.775915 | 0.7020754 | 1 | SAT2    |

|                    |            |                                                                     |        |         |           |          |           |   |         |
|--------------------|------------|---------------------------------------------------------------------|--------|---------|-----------|----------|-----------|---|---------|
| Biological Process | GO:0008627 | intrinsic apoptotic signaling pathway in response to osmotic stress | 1/2279 | 8/18866 | 0.6430433 | 0.775915 | 0.7020754 | 1 | ARHGEF2 |
| Biological Process | GO:0009221 | pyrimidine deoxyribonucleotide biosynthetic process                 | 1/2279 | 8/18866 | 0.6430433 | 0.775915 | 0.7020754 | 1 | DCTD    |
| Biological Process | GO:0009304 | tRNA transcription                                                  | 1/2279 | 8/18866 | 0.6430433 | 0.775915 | 0.7020754 | 1 | BRF1    |
| Biological Process | GO:0009750 | response to fructose                                                | 1/2279 | 8/18866 | 0.6430433 | 0.775915 | 0.7020754 | 1 | SLC2A5  |
| Biological Process | GO:0010668 | ectodermal cell differentiation                                     | 1/2279 | 8/18866 | 0.6430433 | 0.775915 | 0.7020754 | 1 | MIR145  |
| Biological Process | GO:0010825 | positive regulation of centrosome duplication                       | 1/2279 | 8/18866 | 0.6430433 | 0.775915 | 0.7020754 | 1 | POC1A   |
| Biological Process | GO:0010886 | positive regulation of cholesterol storage                          | 1/2279 | 8/18866 | 0.6430433 | 0.775915 | 0.7020754 | 1 | EHD1    |
| Biological Process | GO:0014891 | striated muscle atrophy                                             | 1/2279 | 8/18866 | 0.6430433 | 0.775915 | 0.7020754 | 1 | GSN     |
| Biological Process | GO:0014908 | myotube differentiation involved in skeletal muscle regeneration    | 1/2279 | 8/18866 | 0.6430433 | 0.775915 | 0.7020754 | 1 | CD9     |

|                    |            |                                                   |        |         |           |          |           |   |        |
|--------------------|------------|---------------------------------------------------|--------|---------|-----------|----------|-----------|---|--------|
| Biological Process | GO:0016093 | polyprenol metabolic process                      | 1/2279 | 8/18866 | 0.6430433 | 0.775915 | 0.7020754 | 1 | DPAGT1 |
| Biological Process | GO:0017185 | peptidyl-lysine hydroxylation                     | 1/2279 | 8/18866 | 0.6430433 | 0.775915 | 0.7020754 | 1 | P3H3   |
| Biological Process | GO:0019682 | glyceraldehyde-3-phosphate metabolic process      | 1/2279 | 8/18866 | 0.6430433 | 0.775915 | 0.7020754 | 1 | GLYCTK |
| Biological Process | GO:0019856 | pyrimidine nucleobase biosynthetic process        | 1/2279 | 8/18866 | 0.6430433 | 0.775915 | 0.7020754 | 1 | DHODH  |
| Biological Process | GO:0021979 | hypothalamus cell differentiation                 | 1/2279 | 8/18866 | 0.6430433 | 0.775915 | 0.7020754 | 1 | NRP2   |
| Biological Process | GO:0031620 | regulation of fever generation                    | 1/2279 | 8/18866 | 0.6430433 | 0.775915 | 0.7020754 | 1 | TNF    |
| Biological Process | GO:0031946 | regulation of glucocorticoid biosynthetic process | 1/2279 | 8/18866 | 0.6430433 | 0.775915 | 0.7020754 | 1 | DGKQ   |
| Biological Process | GO:0032049 | cardiolipin biosynthetic process                  | 1/2279 | 8/18866 | 0.6430433 | 0.775915 | 0.7020754 | 1 | PGS1   |
| Biological Process | GO:0032594 | protein transport within lipid bilayer            | 1/2279 | 8/18866 | 0.6430433 | 0.775915 | 0.7020754 | 1 | RILPL1 |



|                    |            |                                                       |        |         |           |          |           |   |          |
|--------------------|------------|-------------------------------------------------------|--------|---------|-----------|----------|-----------|---|----------|
| Biological Process | GO:0032650 | regulation of interleukin-1 alpha production          | 1/2279 | 8/18866 | 0.6430433 | 0.775915 | 0.7020754 | 1 | IL16     |
| Biological Process | GO:0032713 | negative regulation of interleukin-4 production       | 1/2279 | 8/18866 | 0.6430433 | 0.775915 | 0.7020754 | 1 | ZFPM1    |
| Biological Process | GO:0033084 | regulation of immature T cell proliferation in thymus | 1/2279 | 8/18866 | 0.6430433 | 0.775915 | 0.7020754 | 1 | TMEM131L |
| Biological Process | GO:0033129 | positive regulation of histone phosphorylation        | 1/2279 | 8/18866 | 0.6430433 | 0.775915 | 0.7020754 | 1 | RPS6KA4  |
| Biological Process | GO:0033504 | floor plate development                               | 1/2279 | 8/18866 | 0.6430433 | 0.775915 | 0.7020754 | 1 | NODAL    |
| Biological Process | GO:0034214 | protein hexamerization                                | 1/2279 | 8/18866 | 0.6430433 | 0.775915 | 0.7020754 | 1 | LRRC8C   |
| Biological Process | GO:0034475 | U4 snRNA 3'-end processing                            | 1/2279 | 8/18866 | 0.6430433 | 0.775915 | 0.7020754 | 1 | EXOSC2   |
| Biological Process | GO:0035740 | CD8-positive, alpha-beta T cell proliferation         | 1/2279 | 8/18866 | 0.6430433 | 0.775915 | 0.7020754 | 1 | VSIR     |
| Biological Process | GO:0035754 | B cell chemotaxis                                     | 1/2279 | 8/18866 | 0.6430433 | 0.775915 | 0.7020754 | 1 | PIK3CD   |

|                    |            |                                                                              |        |         |           |          |           |   |         |
|--------------------|------------|------------------------------------------------------------------------------|--------|---------|-----------|----------|-----------|---|---------|
| Biological Process | GO:0036353 | histone H2A-K119 monoubiquitination                                          | 1/2279 | 8/18866 | 0.6430433 | 0.775915 | 0.7020754 | 1 | PCGF3   |
| Biological Process | GO:0036480 | neuron intrinsic apoptotic signaling pathway in response to oxidative stress | 1/2279 | 8/18866 | 0.6430433 | 0.775915 | 0.7020754 | 1 | PRKN    |
| Biological Process | GO:0038114 | interleukin-21-mediated signaling pathway                                    | 1/2279 | 8/18866 | 0.6430433 | 0.775915 | 0.7020754 | 1 | JAK1    |
| Biological Process | GO:0039536 | negative regulation of RIG-I signaling pathway                               | 1/2279 | 8/18866 | 0.6430433 | 0.775915 | 0.7020754 | 1 | SEC14L1 |
| Biological Process | GO:0042373 | vitamin K metabolic process                                                  | 1/2279 | 8/18866 | 0.6430433 | 0.775915 | 0.7020754 | 1 | CYP4F3  |
| Biological Process | GO:0042726 | flavin-containing compound metabolic process                                 | 1/2279 | 8/18866 | 0.6430433 | 0.775915 | 0.7020754 | 1 | SLC52A2 |
| Biological Process | GO:0042780 | tRNA 3'-end processing                                                       | 1/2279 | 8/18866 | 0.6430433 | 0.775915 | 0.7020754 | 1 | PTCD1   |
| Biological Process | GO:0042796 | snRNA transcription by RNA polymerase III                                    | 1/2279 | 8/18866 | 0.6430433 | 0.775915 | 0.7020754 | 1 | ZC3H8   |
| Biological Process | GO:0043045 | DNA methylation involved in embryo development                               | 1/2279 | 8/18866 | 0.6430433 | 0.775915 | 0.7020754 | 1 | DNMT1   |

|                    |            |                                                                                         |        |         |           |          |           |   |        |
|--------------------|------------|-----------------------------------------------------------------------------------------|--------|---------|-----------|----------|-----------|---|--------|
| Biological Process | GO:0043416 | regulation of skeletal muscle tissue regeneration                                       | 1/2279 | 8/18866 | 0.6430433 | 0.775915 | 0.7020754 | 1 | TGFBR2 |
| Biological Process | GO:0043633 | polyadenylation-dependent RNA catabolic process                                         | 1/2279 | 8/18866 | 0.6430433 | 0.775915 | 0.7020754 | 1 | EXOSC2 |
| Biological Process | GO:0044387 | negative regulation of protein kinase activity by regulation of protein phosphorylation | 1/2279 | 8/18866 | 0.6430433 | 0.775915 | 0.7020754 | 1 | CORO1C |
| Biological Process | GO:0044828 | negative regulation by host of viral genome replication                                 | 1/2279 | 8/18866 | 0.6430433 | 0.775915 | 0.7020754 | 1 | PRKN   |
| Biological Process | GO:0045188 | regulation of circadian sleep/wake cycle, non-REM sleep                                 | 1/2279 | 8/18866 | 0.6430433 | 0.775915 | 0.7020754 | 1 | GHRL   |
| Biological Process | GO:0045617 | negative regulation of keratinocyte differentiation                                     | 1/2279 | 8/18866 | 0.6430433 | 0.775915 | 0.7020754 | 1 | GRHL2  |
| Biological Process | GO:0046130 | purine ribonucleoside catabolic process                                                 | 1/2279 | 8/18866 | 0.6430433 | 0.775915 | 0.7020754 | 1 | PNP    |
| Biological Process | GO:0046469 | platelet activating factor metabolic process                                            | 1/2279 | 8/18866 | 0.6430433 | 0.775915 | 0.7020754 | 1 | CHPT1  |
| Biological Process | GO:0046477 | glycosylceramide catabolic process                                                      | 1/2279 | 8/18866 | 0.6430433 | 0.775915 | 0.7020754 | 1 | GALC   |

|                    |            |                                                           |        |         |           |          |           |   |        |
|--------------------|------------|-----------------------------------------------------------|--------|---------|-----------|----------|-----------|---|--------|
| Biological Process | GO:0046533 | negative regulation of photoreceptor cell differentiation | 1/2279 | 8/18866 | 0.6430433 | 0.775915 | 0.7020754 | 1 | NOTCH1 |
| Biological Process | GO:0046886 | positive regulation of hormone biosynthetic process       | 1/2279 | 8/18866 | 0.6430433 | 0.775915 | 0.7020754 | 1 | POR    |
| Biological Process | GO:0048312 | intracellular distribution of mitochondria                | 1/2279 | 8/18866 | 0.6430433 | 0.775915 | 0.7020754 | 1 | DNM1L  |
| Biological Process | GO:0048743 | positive regulation of skeletal muscle fiber development  | 1/2279 | 8/18866 | 0.6430433 | 0.775915 | 0.7020754 | 1 | BCL2   |
| Biological Process | GO:0048793 | pronephros development                                    | 1/2279 | 8/18866 | 0.6430433 | 0.775915 | 0.7020754 | 1 | PAX2   |
| Biological Process | GO:0048861 | leukemia inhibitory factor signaling pathway              | 1/2279 | 8/18866 | 0.6430433 | 0.775915 | 0.7020754 | 1 | LIF    |
| Biological Process | GO:0051103 | DNA ligation involved in DNA repair                       | 1/2279 | 8/18866 | 0.6430433 | 0.775915 | 0.7020754 | 1 | PAXX   |
| Biological Process | GO:0051964 | negative regulation of synapse assembly                   | 1/2279 | 8/18866 | 0.6430433 | 0.775915 | 0.7020754 | 1 | SLIT1  |
| Biological Process | GO:0055118 | negative regulation of cardiac muscle contraction         | 1/2279 | 8/18866 | 0.6430433 | 0.775915 | 0.7020754 | 1 | BIN1   |

|                    |            |                                                                             |        |         |           |          |           |   |        |
|--------------------|------------|-----------------------------------------------------------------------------|--------|---------|-----------|----------|-----------|---|--------|
| Biological Process | GO:0060020 | Bergmann glial cell differentiation                                         | 1/2279 | 8/18866 | 0.6430433 | 0.775915 | 0.7020754 | 1 | TTC21B |
| Biological Process | GO:0060027 | convergent extension involved in gastrulation                               | 1/2279 | 8/18866 | 0.6430433 | 0.775915 | 0.7020754 | 1 | WNT11  |
| Biological Process | GO:0060056 | mammary gland involution                                                    | 1/2279 | 8/18866 | 0.6430433 | 0.775915 | 0.7020754 | 1 | VDR    |
| Biological Process | GO:0060158 | phospholipase C-activating dopamine receptor signaling pathway              | 1/2279 | 8/18866 | 0.6430433 | 0.775915 | 0.7020754 | 1 | GNA11  |
| Biological Process | GO:0060290 | transdifferentiation                                                        | 1/2279 | 8/18866 | 0.6430433 | 0.775915 | 0.7020754 | 1 | SMAD3  |
| Biological Process | GO:0060316 | positive regulation of ryanodine-sensitive calcium-release channel activity | 1/2279 | 8/18866 | 0.6430433 | 0.775915 | 0.7020754 | 1 | GSTO1  |
| Biological Process | GO:0060372 | regulation of atrial cardiac muscle cell membrane repolarization            | 1/2279 | 8/18866 | 0.6430433 | 0.775915 | 0.7020754 | 1 | KCNQ1  |
| Biological Process | GO:0060430 | lung sacculle development                                                   | 1/2279 | 8/18866 | 0.6430433 | 0.775915 | 0.7020754 | 1 | CREB1  |
| Biological Process | GO:0060638 | mesenchymal-epithelial cell signaling                                       | 1/2279 | 8/18866 | 0.6430433 | 0.775915 | 0.7020754 | 1 | FGFR1  |

|                    |            |                                                           |        |         |           |          |           |   |        |
|--------------------|------------|-----------------------------------------------------------|--------|---------|-----------|----------|-----------|---|--------|
| Biological Process | GO:0060896 | neural plate pattern specification                        | 1/2279 | 8/18866 | 0.6430433 | 0.775915 | 0.7020754 | 1 | SSBP3  |
| Biological Process | GO:0061004 | pattern specification involved in kidney development      | 1/2279 | 8/18866 | 0.6430433 | 0.775915 | 0.7020754 | 1 | PAX2   |
| Biological Process | GO:0061101 | neuroendocrine cell differentiation                       | 1/2279 | 8/18866 | 0.6430433 | 0.775915 | 0.7020754 | 1 | WNT11  |
| Biological Process | GO:0061438 | renal system vasculature morphogenesis                    | 1/2279 | 8/18866 | 0.6430433 | 0.775915 | 0.7020754 | 1 | PDGFRB |
| Biological Process | GO:0061439 | kidney vasculature morphogenesis                          | 1/2279 | 8/18866 | 0.6430433 | 0.775915 | 0.7020754 | 1 | PDGFRB |
| Biological Process | GO:0070127 | tRNA aminoacylation for mitochondrial protein translation | 1/2279 | 8/18866 | 0.6430433 | 0.775915 | 0.7020754 | 1 | EARS2  |
| Biological Process | GO:0070813 | hydrogen sulfide metabolic process                        | 1/2279 | 8/18866 | 0.6430433 | 0.775915 | 0.7020754 | 1 | CBS    |
| Biological Process | GO:0070973 | protein localization to endoplasmic reticulum exit site   | 1/2279 | 8/18866 | 0.6430433 | 0.775915 | 0.7020754 | 1 | MIA3   |
| Biological Process | GO:0071420 | cellular response to histamine                            | 1/2279 | 8/18866 | 0.6430433 | 0.775915 | 0.7020754 | 1 | HRH1   |

|                    |            |                                                                 |        |         |           |          |           |   |        |
|--------------------|------------|-----------------------------------------------------------------|--------|---------|-----------|----------|-----------|---|--------|
| Biological Process | GO:0071499 | cellular response to laminar fluid shear stress                 | 1/2279 | 8/18866 | 0.6430433 | 0.775915 | 0.7020754 | 1 | NFE2L2 |
| Biological Process | GO:0071671 | regulation of smooth muscle cell chemotaxis                     | 1/2279 | 8/18866 | 0.6430433 | 0.775915 | 0.7020754 | 1 | PDGFD  |
| Biological Process | GO:0071676 | negative regulation of mononuclear cell migration               | 1/2279 | 8/18866 | 0.6430433 | 0.775915 | 0.7020754 | 1 | PLCB1  |
| Biological Process | GO:0071839 | apoptotic process in bone marrow cell                           | 1/2279 | 8/18866 | 0.6430433 | 0.775915 | 0.7020754 | 1 | BCL2L1 |
| Biological Process | GO:0072048 | renal system pattern specification                              | 1/2279 | 8/18866 | 0.6430433 | 0.775915 | 0.7020754 | 1 | PAX2   |
| Biological Process | GO:0072050 | S-shaped body morphogenesis                                     | 1/2279 | 8/18866 | 0.6430433 | 0.775915 | 0.7020754 | 1 | PDGFRB |
| Biological Process | GO:0072161 | mesenchymal cell differentiation involved in kidney development | 1/2279 | 8/18866 | 0.6430433 | 0.775915 | 0.7020754 | 1 | PAX2   |
| Biological Process | GO:0072201 | negative regulation of mesenchymal cell proliferation           | 1/2279 | 8/18866 | 0.6430433 | 0.775915 | 0.7020754 | 1 | WNT11  |
| Biological Process | GO:0072282 | metanephric nephron tubule morphogenesis                        | 1/2279 | 8/18866 | 0.6430433 | 0.775915 | 0.7020754 | 1 | PAX2   |

|                    |            |                                                |        |         |           |          |           |   |         |
|--------------------|------------|------------------------------------------------|--------|---------|-----------|----------|-----------|---|---------|
| Biological Process | GO:0072674 | multinuclear osteoclast differentiation        | 1/2279 | 8/18866 | 0.6430433 | 0.775915 | 0.7020754 | 1 | SBNO2   |
| Biological Process | GO:0075713 | establishment of integrated proviral latency   | 1/2279 | 8/18866 | 0.6430433 | 0.775915 | 0.7020754 | 1 | BANF1   |
| Biological Process | GO:0090045 | positive regulation of deacetylase activity    | 1/2279 | 8/18866 | 0.6430433 | 0.775915 | 0.7020754 | 1 | C6orf89 |
| Biological Process | GO:0090381 | regulation of heart induction                  | 1/2279 | 8/18866 | 0.6430433 | 0.775915 | 0.7020754 | 1 | WNT11   |
| Biological Process | GO:0090400 | stress-induced premature senescence            | 1/2279 | 8/18866 | 0.6430433 | 0.775915 | 0.7020754 | 1 | ARNTL   |
| Biological Process | GO:0098700 | neurotransmitter loading into synaptic vesicle | 1/2279 | 8/18866 | 0.6430433 | 0.775915 | 0.7020754 | 1 | DDC     |
| Biological Process | GO:0098756 | response to interleukin-21                     | 1/2279 | 8/18866 | 0.6430433 | 0.775915 | 0.7020754 | 1 | JAK1    |
| Biological Process | GO:0098757 | cellular response to interleukin-21            | 1/2279 | 8/18866 | 0.6430433 | 0.775915 | 0.7020754 | 1 | JAK1    |
| Biological Process | GO:0120040 | regulation of macrophage proliferation         | 1/2279 | 8/18866 | 0.6430433 | 0.775915 | 0.7020754 | 1 | CSF1R   |



|                    |            |                                                                                            |        |         |           |          |           |   |        |
|--------------------|------------|--------------------------------------------------------------------------------------------|--------|---------|-----------|----------|-----------|---|--------|
| Biological Process | GO:0150172 | regulation of phosphatidylcholine metabolic process                                        | 1/2279 | 8/18866 | 0.6430433 | 0.775915 | 0.7020754 | 1 | LPCAT1 |
| Biological Process | GO:1900364 | negative regulation of mRNA polyadenylation                                                | 1/2279 | 8/18866 | 0.6430433 | 0.775915 | 0.7020754 | 1 | RNF40  |
| Biological Process | GO:1901538 | changes to DNA methylation involved in embryo development                                  | 1/2279 | 8/18866 | 0.6430433 | 0.775915 | 0.7020754 | 1 | DNMT1  |
| Biological Process | GO:1901620 | regulation of smoothed signaling pathway involved in dorsal/ventral neural tube patterning | 1/2279 | 8/18866 | 0.6430433 | 0.775915 | 0.7020754 | 1 | SUFU   |
| Biological Process | GO:1902416 | positive regulation of mRNA binding                                                        | 1/2279 | 8/18866 | 0.6430433 | 0.775915 | 0.7020754 | 1 | EIF4G1 |
| Biological Process | GO:1902744 | negative regulation of lamellipodium organization                                          | 1/2279 | 8/18866 | 0.6430433 | 0.775915 | 0.7020754 | 1 | KANK1  |
| Biological Process | GO:1902949 | positive regulation of tau-protein kinase activity                                         | 1/2279 | 8/18866 | 0.6430433 | 0.775915 | 0.7020754 | 1 | CLU    |
| Biological Process | GO:1903376 | regulation of oxidative stress-induced neuron intrinsic apoptotic signaling pathway        | 1/2279 | 8/18866 | 0.6430433 | 0.775915 | 0.7020754 | 1 | PRKN   |
| Biological Process | GO:1903400 | L-arginine transmembrane transport                                                         | 1/2279 | 8/18866 | 0.6430433 | 0.775915 | 0.7020754 | 1 | SLC7A1 |

|                    |            |                                                                                               |        |         |           |          |           |   |         |
|--------------------|------------|-----------------------------------------------------------------------------------------------|--------|---------|-----------|----------|-----------|---|---------|
| Biological Process | GO:1903715 | regulation of aerobic respiration                                                             | 1/2279 | 8/18866 | 0.6430433 | 0.775915 | 0.7020754 | 1 | CBFA2T3 |
| Biological Process | GO:1903764 | regulation of potassium ion export across plasma membrane                                     | 1/2279 | 8/18866 | 0.6430433 | 0.775915 | 0.7020754 | 1 | ANO6    |
| Biological Process | GO:1903995 | regulation of non-membrane spanning protein tyrosine kinase activity                          | 1/2279 | 8/18866 | 0.6430433 | 0.775915 | 0.7020754 | 1 | DUSP22  |
| Biological Process | GO:1904124 | microglial cell migration                                                                     | 1/2279 | 8/18866 | 0.6430433 | 0.775915 | 0.7020754 | 1 | CX3CR1  |
| Biological Process | GO:1904139 | regulation of microglial cell migration                                                       | 1/2279 | 8/18866 | 0.6430433 | 0.775915 | 0.7020754 | 1 | CX3CR1  |
| Biological Process | GO:1904714 | regulation of chaperone-mediated autophagy                                                    | 1/2279 | 8/18866 | 0.6430433 | 0.775915 | 0.7020754 | 1 | GFAP    |
| Biological Process | GO:1905024 | regulation of membrane repolarization during ventricular cardiac muscle cell action potential | 1/2279 | 8/18866 | 0.6430433 | 0.775915 | 0.7020754 | 1 | NOS1AP  |
| Biological Process | GO:1905247 | positive regulation of aspartic-type peptidase activity                                       | 1/2279 | 8/18866 | 0.6430433 | 0.775915 | 0.7020754 | 1 | GRN     |
| Biological Process | GO:1905456 | regulation of lymphoid progenitor cell differentiation                                        | 1/2279 | 8/18866 | 0.6430433 | 0.775915 | 0.7020754 | 1 | NOTCH1  |

|                    |            |                                                                       |         |           |           |          |           |    |                                                                                       |
|--------------------|------------|-----------------------------------------------------------------------|---------|-----------|-----------|----------|-----------|----|---------------------------------------------------------------------------------------|
| Biological Process | GO:1990314 | cellular response to insulin-like growth factor stimulus              | 1/2279  | 8/18866   | 0.6430433 | 0.775915 | 0.7020754 | 1  | CREB1                                                                                 |
| Biological Process | GO:1990709 | presynaptic active zone organization                                  | 1/2279  | 8/18866   | 0.6430433 | 0.775915 | 0.7020754 | 1  | CTBP2                                                                                 |
| Biological Process | GO:2000192 | negative regulation of fatty acid transport                           | 1/2279  | 8/18866   | 0.6430433 | 0.775915 | 0.7020754 | 1  | THBS1                                                                                 |
| Biological Process | GO:2000510 | positive regulation of dendritic cell chemotaxis                      | 1/2279  | 8/18866   | 0.6430433 | 0.775915 | 0.7020754 | 1  | CALR                                                                                  |
| Biological Process | GO:2000564 | regulation of CD8-positive, alpha-beta T cell proliferation           | 1/2279  | 8/18866   | 0.6430433 | 0.775915 | 0.7020754 | 1  | VSIR                                                                                  |
| Biological Process | GO:2000643 | positive regulation of early endosome to late endosome transport      | 1/2279  | 8/18866   | 0.6430433 | 0.775915 | 0.7020754 | 1  | EZR                                                                                   |
| Biological Process | GO:2000766 | negative regulation of cytoplasmic translation                        | 1/2279  | 8/18866   | 0.6430433 | 0.775915 | 0.7020754 | 1  | CPEB3                                                                                 |
| Biological Process | GO:2001012 | mesenchymal cell differentiation involved in renal system development | 1/2279  | 8/18866   | 0.6430433 | 0.775915 | 0.7020754 | 1  | PAX2                                                                                  |
| Biological Process | GO:0051225 | spindle assembly                                                      | 13/2279 | 115/18866 | 0.6437193 | 0.776632 | 0.7027242 | 13 | ARHGEF10/CSNK1D/TNKS/RCC1/DYNC1H1/STAG1/NUMA1/MSTO1/NEK6/CHEK2/SPAG5/TUBGCP2/ABRAXAS1 |

|                    |            |                                                       |         |           |           |           |           |    |                                                                                                   |
|--------------------|------------|-------------------------------------------------------|---------|-----------|-----------|-----------|-----------|----|---------------------------------------------------------------------------------------------------|
| Biological Process | GO:0007586 | digestion                                             | 16/2279 | 141/18866 | 0.6441659 | 0.7769734 | 0.7030332 | 16 | SLC2A5/TJP2/VDR/SGK1/TLR9/MGAM/AKR1D1/CHIT1/AQP1/NR1H2/GHRL/SLC22A5/KCNQ1/NOD2/EZR/SST            |
| Biological Process | GO:0008584 | male gonad development                                | 16/2279 | 141/18866 | 0.6441659 | 0.7769734 | 0.7030332 | 16 | ARID5B/CSDE1/FANCA/RARA/SF1/NCOA1/NTRK1/HOXA9/RAD21L1/BCL2/PDGFRB/ERCC1/BCL2L1/HMGCS1/NCOA4/INHBA |
| Biological Process | GO:0000289 | nuclear-transcribed mRNA poly(A) tail shortening      | 4/2279  | 36/18866  | 0.6472174 | 0.7796171 | 0.7054253 | 4  | TNRC6B/SAMD4A/AGO2/CPEB3                                                                          |
| Biological Process | GO:0000460 | maturation of 5.8S rRNA                               | 4/2279  | 36/18866  | 0.6472174 | 0.7796171 | 0.7054253 | 4  | EXOSC2/RCL1/ERI3/NOP14                                                                            |
| Biological Process | GO:0051973 | positive regulation of telomerase activity            | 4/2279  | 36/18866  | 0.6472174 | 0.7796171 | 0.7054253 | 4  | TNKS/HMBOX1/GRHL2/PARM1                                                                           |
| Biological Process | GO:0070873 | regulation of glycogen metabolic process              | 4/2279  | 36/18866  | 0.6472174 | 0.7796171 | 0.7054253 | 4  | DYRK2/PPP1CB/ESRRB/RUBCNL                                                                         |
| Biological Process | GO:1901661 | quinone metabolic process                             | 4/2279  | 36/18866  | 0.6472174 | 0.7796171 | 0.7054253 | 4  | CYP4F3/AIFM2/COQ4/COQ8B                                                                           |
| Biological Process | GO:1905332 | positive regulation of morphogenesis of an epithelium | 4/2279  | 36/18866  | 0.6472174 | 0.7796171 | 0.7054253 | 4  | RREB1/PAX2/LIF/HOXB7                                                                              |
| Biological Process | GO:2000781 | positive regulation of double-strand break repair     | 4/2279  | 36/18866  | 0.6472174 | 0.7796171 | 0.7054253 | 4  | SPIDR/FOXM1/PARP9/SLF1                                                                            |

|                    |            |                                                        |        |          |           |           |           |   |                                     |
|--------------------|------------|--------------------------------------------------------|--------|----------|-----------|-----------|-----------|---|-------------------------------------|
| Biological Process | GO:0003197 | endocardial cushion development                        | 5/2279 | 45/18866 | 0.6474244 | 0.7796171 | 0.7054253 | 5 | TGFBR2/RBPJ/ENG/NOTCH1/NEDD4        |
| Biological Process | GO:0010828 | positive regulation of glucose transmembrane transport | 5/2279 | 45/18866 | 0.6474244 | 0.7796171 | 0.7054253 | 5 | PIK3R1/SLC1A2/PRKCI/NFE2L2/CLTCL1   |
| Biological Process | GO:0014047 | glutamate secretion                                    | 5/2279 | 45/18866 | 0.6474244 | 0.7796171 | 0.7054253 | 5 | PPFIA1/NF1/SLC1A2/SLC1A6/SLC1A3     |
| Biological Process | GO:0032722 | positive regulation of chemokine production            | 5/2279 | 45/18866 | 0.6474244 | 0.7796171 | 0.7054253 | 5 | TNF/TLR9/MBP/DEFB124/IL6R           |
| Biological Process | GO:0046189 | phenol-containing compound biosynthetic process        | 5/2279 | 45/18866 | 0.6474244 | 0.7796171 | 0.7054253 | 5 | ZEB2/DDC/CDH3/RAPGEF2/MYO5A         |
| Biological Process | GO:1904646 | cellular response to amyloid-beta                      | 5/2279 | 45/18866 | 0.6474244 | 0.7796171 | 0.7054253 | 5 | MIR140/ABCC1/FPR2/APP/IGF1R         |
| Biological Process | GO:0006584 | catecholamine metabolic process                        | 6/2279 | 54/18866 | 0.6489071 | 0.7803115 | 0.7060536 | 6 | COMT/DDC/SULT1A2/ITGB2/EPAS1/PRKN   |
| Biological Process | GO:0006749 | glutathione metabolic process                          | 6/2279 | 54/18866 | 0.6489071 | 0.7803115 | 0.7060536 | 6 | GGT1/CNDP2/GSTM5/MGST2/NFE2L2/GLRX2 |
| Biological Process | GO:0009712 | catechol-containing compound metabolic process         | 6/2279 | 54/18866 | 0.6489071 | 0.7803115 | 0.7060536 | 6 | COMT/DDC/SULT1A2/ITGB2/EPAS1/PRKN   |

|                    |            |                                                              |        |          |           |           |           |   |                                         |
|--------------------|------------|--------------------------------------------------------------|--------|----------|-----------|-----------|-----------|---|-----------------------------------------|
| Biological Process | GO:0010043 | response to zinc ion                                         | 6/2279 | 54/18866 | 0.6489071 | 0.7803115 | 0.7060536 | 6 | S100A8/CREB1/D2HGDH/MTF1/SLC39A13/CRIP1 |
| Biological Process | GO:0030857 | negative regulation of epithelial cell differentiation       | 6/2279 | 54/18866 | 0.6489071 | 0.7803115 | 0.7060536 | 6 | SPRED2/DLL1/GRHL2/NOTCH1/NOTCH4/NODAL   |
| Biological Process | GO:1901185 | negative regulation of ERBB signaling pathway                | 6/2279 | 54/18866 | 0.6489071 | 0.7803115 | 0.7060536 | 6 | TGFA/ARHGEF7/EPS15L1/PTPRJ/DUSP3/EPS15  |
| Biological Process | GO:2000179 | positive regulation of neural precursor cell proliferation   | 6/2279 | 54/18866 | 0.6489071 | 0.7803115 | 0.7060536 | 6 | CTSZ/DISC1/GNAI2/ZNF335/NOTCH1/CX3CR1   |
| Biological Process | GO:0006817 | phosphate ion transport                                      | 3/2279 | 27/18866 | 0.6495615 | 0.7803115 | 0.7060536 | 3 | FGFR1/SLC37A1/CEBPB                     |
| Biological Process | GO:0007026 | negative regulation of microtubule depolymerization          | 3/2279 | 27/18866 | 0.6495615 | 0.7803115 | 0.7060536 | 3 | NAV3/ARHGEF2/SPEF1                      |
| Biological Process | GO:0009651 | response to salt stress                                      | 3/2279 | 27/18866 | 0.6495615 | 0.7803115 | 0.7060536 | 3 | TNF/AQP1/ANXA7                          |
| Biological Process | GO:0010971 | positive regulation of G2/M transition of mitotic cell cycle | 3/2279 | 27/18866 | 0.6495615 | 0.7803115 | 0.7060536 | 3 | BRD4/APP/CDC25A                         |
| Biological Process | GO:0031954 | positive regulation of protein autophosphorylation           | 3/2279 | 27/18866 | 0.6495615 | 0.7803115 | 0.7060536 | 3 | PDGFD/PDGFB/PDGFC                       |

|                    |            |                                                         |         |           |           |           |           |    |                                                                      |
|--------------------|------------|---------------------------------------------------------|---------|-----------|-----------|-----------|-----------|----|----------------------------------------------------------------------|
| Biological Process | GO:0033081 | regulation of T cell differentiation in thymus          | 3/2279  | 27/18866  | 0.6495615 | 0.7803115 | 0.7060536 | 3  | ZC3H8/CLPTM1/TMEM131L                                                |
| Biological Process | GO:0045603 | positive regulation of endothelial cell differentiation | 3/2279  | 27/18866  | 0.6495615 | 0.7803115 | 0.7060536 | 3  | ADD1/NOTCH1/S1PR2                                                    |
| Biological Process | GO:0045672 | positive regulation of osteoclast differentiation       | 3/2279  | 27/18866  | 0.6495615 | 0.7803115 | 0.7060536 | 3  | CREB1/TNF/TMEM64                                                     |
| Biological Process | GO:0048520 | positive regulation of behavior                         | 3/2279  | 27/18866  | 0.6495615 | 0.7803115 | 0.7060536 | 3  | HDAC4/GHRL/MEF2C                                                     |
| Biological Process | GO:0071514 | genetic imprinting                                      | 3/2279  | 27/18866  | 0.6495615 | 0.7803115 | 0.7060536 | 3  | KDM1B/KCNQ1/PCGF3                                                    |
| Biological Process | GO:1900120 | regulation of receptor binding                          | 3/2279  | 27/18866  | 0.6495615 | 0.7803115 | 0.7060536 | 3  | IL10/ATP2A3/PLCL1                                                    |
| Biological Process | GO:1903203 | regulation of oxidative stress-induced neuron death     | 3/2279  | 27/18866  | 0.6495615 | 0.7803115 | 0.7060536 | 3  | IL10/FBXO7/PRKN                                                      |
| Biological Process | GO:0048524 | positive regulation of viral process                    | 12/2279 | 107/18866 | 0.6526643 | 0.7839398 | 0.7093366 | 12 | P4HB/TRIM38/CTDP1/SRPK2/POLR2F/CCL5/CSF1R/LARP1/PC/RSF1/NOTCH1/NR5A2 |
| Biological Process | GO:0003407 | neural retina development                               | 8/2279  | 72/18866  | 0.6536698 | 0.7848498 | 0.71016   | 8  | CRB1/HIPK2/GNAT2/RPGRIP1/ZHX2/SDK2/NRL/CABP4                         |

|                    |            |                                                       |         |           |           |           |          |    |                                                                                                                                                                                                  |
|--------------------|------------|-------------------------------------------------------|---------|-----------|-----------|-----------|----------|----|--------------------------------------------------------------------------------------------------------------------------------------------------------------------------------------------------|
| Biological Process | GO:0009119 | ribonucleoside metabolic process                      | 8/2279  | 72/18866  | 0.6536698 | 0.7848498 | 0.71016  | 8  | CDA/AMPD3/TJP2/PNP/GUK1/GMPR2/IMPDH1/ACP3                                                                                                                                                        |
| Biological Process | GO:0070988 | demethylation                                         | 8/2279  | 72/18866  | 0.6536698 | 0.7848498 | 0.71016  | 8  | KDM4B/KDM2A/POR/KDM1B/KDM4C/FTO/TET2/KDM7A                                                                                                                                                       |
| Biological Process | GO:0006839 | mitochondrial transport                               | 31/2279 | 271/18866 | 0.6556411 | 0.786859  | 0.711978 | 31 | PRKAG2/SLC25A37/TFDP1/YWHAH/PAM16/BMF/SPG7/FBXO7/MIPEP/AIP/USP36/ABLIM3/UBE2J2/HK2/SFXN1/ACACB/YWHAZ/FIS1/BCL2/ACACA/TIMM44/TP53BP2/BCL2L1/SREBF1/YWHAQ/CPT1A/SLC25A1/TMEM14C/PRKAA1/ATP5PD/PRKN |
| Biological Process | GO:0001937 | negative regulation of endothelial cell proliferation | 9/2279  | 81/18866  | 0.6564866 | 0.786859  | 0.711978 | 9  | PPARG/TNF/THBS1/MIR24-2/FLT1/NF1/GHRL/VASH1/MEF2C                                                                                                                                                |
| Biological Process | GO:2000027 | regulation of animal organ morphogenesis              | 29/2279 | 254/18866 | 0.6566068 | 0.786859  | 0.711978 | 29 | TACSTD2/RXRA/AP2A1/VDR/VANGL1/TNF/TNFAIP3/TGFBR2/PRICKLE2/RBPJ/WNT11/PAX2/FGFR1/SMURF1/POR/PFN1/RUNX2/PSMF1/ENG/ARRB2/DAAM1/BCL2/PSMB7/NOTCH1/CPB2/ANKRD6/LIF/HOXB7/PSMD13                       |
| Biological Process | GO:0001675 | acrosome assembly                                     | 2/2279  | 18/18866  | 0.6579106 | 0.786859  | 0.711978 | 2  | ACRBP/MFSD14A                                                                                                                                                                                    |
| Biological Process | GO:0006337 | nucleosome disassembly                                | 2/2279  | 18/18866  | 0.6579106 | 0.786859  | 0.711978 | 2  | SMARCD1/SMARCD2                                                                                                                                                                                  |
| Biological Process | GO:0006744 | ubiquinone biosynthetic process                       | 2/2279  | 18/18866  | 0.6579106 | 0.786859  | 0.711978 | 2  | COQ4/COQ8B                                                                                                                                                                                       |
| Biological Process | GO:0007597 | blood coagulation, intrinsic pathway                  | 2/2279  | 18/18866  | 0.6579106 | 0.786859  | 0.711978 | 2  | GP9/F12                                                                                                                                                                                          |



|                    |            |                                                    |        |          |           |          |          |   |                 |
|--------------------|------------|----------------------------------------------------|--------|----------|-----------|----------|----------|---|-----------------|
| Biological Process | GO:0008272 | sulfate transport                                  | 2/2279 | 18/18866 | 0.6579106 | 0.786859 | 0.711978 | 2 | SLC13A4/SLC26A1 |
| Biological Process | GO:0009200 | deoxyribonucleoside triphosphate metabolic process | 2/2279 | 18/18866 | 0.6579106 | 0.786859 | 0.711978 | 2 | RRM2B/GUK1      |
| Biological Process | GO:0010713 | negative regulation of collagen metabolic process  | 2/2279 | 18/18866 | 0.6579106 | 0.786859 | 0.711978 | 2 | PPARG/NPPC      |
| Biological Process | GO:0017121 | plasma membrane phospholipid scrambling            | 2/2279 | 18/18866 | 0.6579106 | 0.786859 | 0.711978 | 2 | ANO7/ANO6       |
| Biological Process | GO:0021756 | striatum development                               | 2/2279 | 18/18866 | 0.6579106 | 0.786859 | 0.711978 | 2 | SECISBP2/INHBA  |
| Biological Process | GO:0034501 | protein localization to kinetochore                | 2/2279 | 18/18866 | 0.6579106 | 0.786859 | 0.711978 | 2 | CHAMP1/MIS12    |
| Biological Process | GO:0034587 | piRNA metabolic process                            | 2/2279 | 18/18866 | 0.6579106 | 0.786859 | 0.711978 | 2 | PIWIL4/MOV10L1  |
| Biological Process | GO:0035313 | wound healing, spreading of epidermal cells        | 2/2279 | 18/18866 | 0.6579106 | 0.786859 | 0.711978 | 2 | RREB1/COL5A1    |
| Biological Process | GO:0035372 | protein localization to microtubule                | 2/2279 | 18/18866 | 0.6579106 | 0.786859 | 0.711978 | 2 | CHAMP1/MAP1A    |

|                    |            |                                                    |        |          |           |          |          |   |             |
|--------------------|------------|----------------------------------------------------|--------|----------|-----------|----------|----------|---|-------------|
| Biological Process | GO:0043011 | myeloid dendritic cell differentiation             | 2/2279 | 18/18866 | 0.6579106 | 0.786859 | 0.711978 | 2 | TGFBR2/RBPJ |
| Biological Process | GO:0043031 | negative regulation of macrophage activation       | 2/2279 | 18/18866 | 0.6579106 | 0.786859 | 0.711978 | 2 | PTPRC/GRN   |
| Biological Process | GO:0044827 | modulation by host of viral genome replication     | 2/2279 | 18/18866 | 0.6579106 | 0.786859 | 0.711978 | 2 | PHB/PRKN    |
| Biological Process | GO:0046885 | regulation of hormone biosynthetic process         | 2/2279 | 18/18866 | 0.6579106 | 0.786859 | 0.711978 | 2 | DGKQ/POR    |
| Biological Process | GO:0051023 | regulation of immunoglobulin secretion             | 2/2279 | 18/18866 | 0.6579106 | 0.786859 | 0.711978 | 2 | TNF/TRAF2   |
| Biological Process | GO:0060033 | anatomical structure regression                    | 2/2279 | 18/18866 | 0.6579106 | 0.786859 | 0.711978 | 2 | NIN1/FLT1   |
| Biological Process | GO:0060192 | negative regulation of lipase activity             | 2/2279 | 18/18866 | 0.6579106 | 0.786859 | 0.711978 | 2 | POR/SORT1   |
| Biological Process | GO:0061323 | cell proliferation involved in heart morphogenesis | 2/2279 | 18/18866 | 0.6579106 | 0.786859 | 0.711978 | 2 | RBPJ/NOTCH1 |
| Biological Process | GO:0070200 | establishment of protein localization to telomere  | 2/2279 | 18/18866 | 0.6579106 | 0.786859 | 0.711978 | 2 | BRCA2/CCT6A |

|                    |            |                                                                         |         |           |           |           |           |    |                                                                                                                                                                 |
|--------------------|------------|-------------------------------------------------------------------------|---------|-----------|-----------|-----------|-----------|----|-----------------------------------------------------------------------------------------------------------------------------------------------------------------|
| Biological Process | GO:0090190 | positive regulation of branching involved in ureteric bud morphogenesis | 2/2279  | 18/18866  | 0.6579106 | 0.786859  | 0.711978  | 2  | PAX2/HOXB7                                                                                                                                                      |
| Biological Process | GO:1901663 | quinone biosynthetic process                                            | 2/2279  | 18/18866  | 0.6579106 | 0.786859  | 0.711978  | 2  | COQ4/COQ8B                                                                                                                                                      |
| Biological Process | GO:1902683 | regulation of receptor localization to synapse                          | 2/2279  | 18/18866  | 0.6579106 | 0.786859  | 0.711978  | 2  | PRKCZ/CNIH2                                                                                                                                                     |
| Biological Process | GO:1904872 | regulation of telomerase RNA localization to Cajal body                 | 2/2279  | 18/18866  | 0.6579106 | 0.786859  | 0.711978  | 2  | RUVBL1/CCT6A                                                                                                                                                    |
| Biological Process | GO:2000641 | regulation of early endosome to late endosome transport                 | 2/2279  | 18/18866  | 0.6579106 | 0.786859  | 0.711978  | 2  | SNX3/EZR                                                                                                                                                        |
| Biological Process | GO:2000831 | regulation of steroid hormone secretion                                 | 2/2279  | 18/18866  | 0.6579106 | 0.786859  | 0.711978  | 2  | GHRL/AGTR1                                                                                                                                                      |
| Biological Process | GO:0017148 | negative regulation of translation                                      | 25/2279 | 220/18866 | 0.65933   | 0.7884574 | 0.7134243 | 25 | CALR/MIR145/TNRC6B/MIR101-2/AGO1/LARP1/ZC3H12D/SAMD4A/MIR27A/AGO2/RARA/CPEB3/IGF2BP3/INPP5E/FTO/PUS7/MIR138-2/CELF1/NOTCH4/BANK1/ILF3/SYNERIP/EIF4G1/DAPK3/SHFL |
| Biological Process | GO:0060071 | Wnt signaling pathway, planar cell polarity pathway                     | 12/2279 | 108/18866 | 0.6655294 | 0.7957708 | 0.7200417 | 12 | AP2A1/VANG1/PRICKLE2/WNT11/SMURF1/PFN1/PSMF1/ARRB2/DAAM1/PSMB7/ANKRD6/PSMD13                                                                                    |
| Biological Process | GO:0007131 | reciprocal meiotic recombination                                        | 6/2279  | 55/18866  | 0.6668242 | 0.7972187 | 0.7213518 | 6  | EME1/MEIOB/RNF212/DMC1/SLX4/KLHDC3                                                                                                                              |

|                    |            |                                                   |        |          |           |           |           |   |                                              |
|--------------------|------------|---------------------------------------------------|--------|----------|-----------|-----------|-----------|---|----------------------------------------------|
| Biological Process | GO:0010874 | regulation of cholesterol efflux                  | 5/2279 | 46/18866 | 0.6669927 | 0.7972195 | 0.7213525 | 5 | ABCG1/PLTP/MIR27A/NR1H2/ABCA1                |
| Biological Process | GO:0044275 | cellular carbohydrate catabolic process           | 5/2279 | 46/18866 | 0.6669927 | 0.7972195 | 0.7213525 | 5 | AOAH/MGAM/ENOSF1/PGAM1/PPP1CB                |
| Biological Process | GO:0051898 | negative regulation of protein kinase B signaling | 7/2279 | 64/18866 | 0.6676933 | 0.7979565 | 0.7220193 | 7 | MIR145/PHLPP1/PTPRJ/PPP2R5C/ARRB2/BANK1/TSC2 |
| Biological Process | GO:0006699 | bile acid biosynthetic process                    | 4/2279 | 37/18866 | 0.6689556 | 0.7987618 | 0.722748  | 4 | AMACR/AKR1D1/OSBPL6/ACOX2                    |
| Biological Process | GO:0033120 | positive regulation of RNA splicing               | 4/2279 | 37/18866 | 0.6689556 | 0.7987618 | 0.722748  | 4 | ERN1/PIK3R1/DAZAP1/HNRNPLL                   |
| Biological Process | GO:0035137 | hindlimb morphogenesis                            | 4/2279 | 37/18866 | 0.6689556 | 0.7987618 | 0.722748  | 4 | ZBTB16/RARG/NOTCH1/ALX3                      |
| Biological Process | GO:0048048 | embryonic eye morphogenesis                       | 4/2279 | 37/18866 | 0.6689556 | 0.7987618 | 0.722748  | 4 | HIPK2/PAX2/SP3/RARG                          |
| Biological Process | GO:0051031 | tRNA transport                                    | 4/2279 | 37/18866 | 0.6689556 | 0.7987618 | 0.722748  | 4 | RAE1/NUP93/SEC13/NOL6                        |
| Biological Process | GO:0071542 | dopaminergic neuron differentiation               | 4/2279 | 37/18866 | 0.6689556 | 0.7987618 | 0.722748  | 4 | CSNK1D/PHOX2A/CSNK1E/OTX2                    |

|                    |            |                                                                      |         |           |           |           |           |    |                                                                                                      |
|--------------------|------------|----------------------------------------------------------------------|---------|-----------|-----------|-----------|-----------|----|------------------------------------------------------------------------------------------------------|
| Biological Process | GO:1904358 | positive regulation of telomere maintenance via telomere lengthening | 4/2279  | 37/18866  | 0.6689556 | 0.7987618 | 0.722748  | 4  | TNKS/HMBOX1/RTEL1/CCT6A                                                                              |
| Biological Process | GO:0006283 | transcription-coupled nucleotide-excision repair                     | 8/2279  | 73/18866  | 0.6691999 | 0.7988526 | 0.7228302 | 8  | POLR2F/COP55/CCNH/COPS3/ERCC1/POLD3/XPA/ERCC2                                                        |
| Biological Process | GO:0051966 | regulation of synaptic transmission, glutamatergic                   | 8/2279  | 73/18866  | 0.6691999 | 0.7988526 | 0.7228302 | 8  | CCR2/TNF/DISC1/NRXN1/MAPK8IP2/NTRK1/MEF2C/SHANK2                                                     |
| Biological Process | GO:0007605 | sensory perception of sound                                          | 17/2279 | 152/18866 | 0.6700841 | 0.7998076 | 0.7236943 | 17 | KCNE1/HEXB/CDH23/ATP2B2/ATP8B1/MBP/LRIG1/FGFR1/ESPN/WDR1/KCNQ1/TSPEAR/SLC1A3/TMC1/CRYM/CDC14A/SPTBN4 |
| Biological Process | GO:0016925 | protein sumoylation                                                  | 9/2279  | 82/18866  | 0.6711138 | 0.8009361 | 0.7247154 | 9  | HDAC4/TOLLIP/RAE1/NSMCE2/BCL11A/ZMIZ1/RNF212/NUP93/RELA                                              |
| Biological Process | GO:0001656 | metanephros development                                              | 10/2279 | 91/18866  | 0.673294  | 0.8032354 | 0.7267959 | 10 | CTSH/PAX2/RDH10/NF1/WWTR1/PDGFB/BCL2/PDGFRB/ACAT1/LIF                                                |
| Biological Process | GO:0033273 | response to vitamin                                                  | 10/2279 | 91/18866  | 0.673294  | 0.8032354 | 0.7267959 | 10 | PPARG/GSN/VDR/ALPL/RARA/CAT/AQP3/HMGCS1/RELA/ALDH1A2                                                 |
| Biological Process | GO:2000177 | regulation of neural precursor cell proliferation                    | 10/2279 | 91/18866  | 0.673294  | 0.8032354 | 0.7267959 | 10 | CTSZ/SPINT2/DISC1/GNAI2/ILK/NF1/ZNF335/NOTCH1/FOXO1/CX3CR1                                           |
| Biological Process | GO:0001964 | startle response                                                     | 3/2279  | 28/18866  | 0.6743344 | 0.8033669 | 0.7269149 | 3  | NRXN1/CHD8/PRKN                                                                                      |

|                    |            |                                                                      |        |          |           |           |           |   |                     |
|--------------------|------------|----------------------------------------------------------------------|--------|----------|-----------|-----------|-----------|---|---------------------|
| Biological Process | GO:0010458 | exit from mitosis                                                    | 3/2279 | 28/18866 | 0.6743344 | 0.8033669 | 0.7269149 | 3 | CTDP1/CDC45/CDC14A  |
| Biological Process | GO:0031440 | regulation of mRNA 3'-end processing                                 | 3/2279 | 28/18866 | 0.6743344 | 0.8033669 | 0.7269149 | 3 | CPEB3/ZC3H3/RNF40   |
| Biological Process | GO:0031645 | negative regulation of nervous system process                        | 3/2279 | 28/18866 | 0.6743344 | 0.8033669 | 0.7269149 | 3 | IL10/TNFRSF21/S1PR2 |
| Biological Process | GO:0048596 | embryonic camera-type eye morphogenesis                              | 3/2279 | 28/18866 | 0.6743344 | 0.8033669 | 0.7269149 | 3 | HIPK2/PAX2/SP3      |
| Biological Process | GO:0051450 | myoblast proliferation                                               | 3/2279 | 28/18866 | 0.6743344 | 0.8033669 | 0.7269149 | 3 | PAX7/MEIS2/ANKRD2   |
| Biological Process | GO:0051590 | positive regulation of neurotransmitter transport                    | 3/2279 | 28/18866 | 0.6743344 | 0.8033669 | 0.7269149 | 3 | DNM1L/DTNBP1/PRKN   |
| Biological Process | GO:0051883 | killing of cells in other organism involved in symbiotic interaction | 3/2279 | 28/18866 | 0.6743344 | 0.8033669 | 0.7269149 | 3 | AZU1/ELANE/CTSG     |
| Biological Process | GO:0071280 | cellular response to copper ion                                      | 3/2279 | 28/18866 | 0.6743344 | 0.8033669 | 0.7269149 | 3 | APP/AQP1/NFE2L2     |
| Biological Process | GO:0086013 | membrane repolarization during cardiac muscle cell action potential  | 3/2279 | 28/18866 | 0.6743344 | 0.8033669 | 0.7269149 | 3 | KCNE1/NOS1AP/KCNQ1  |

|                    |            |                                                                  |         |           |           |           |           |    |                                                                                                                   |
|--------------------|------------|------------------------------------------------------------------|---------|-----------|-----------|-----------|-----------|----|-------------------------------------------------------------------------------------------------------------------|
| Biological Process | GO:0090200 | positive regulation of release of cytochrome c from mitochondria | 3/2279  | 28/18866  | 0.6743344 | 0.8033669 | 0.7269149 | 3  | BMF/CIDEB/DNM1L                                                                                                   |
| Biological Process | GO:0032368 | regulation of lipid transport                                    | 15/2279 | 135/18866 | 0.674708  | 0.803372  | 0.7269195 | 15 | PPARG/MYB/MAP2K6/ABCG1/ATP8A1/PLTP/THBS1/MIR27A/OSBPL6/NR1H2/ITGB3/GHRL/ABCA1/AGTR1/PRKN                          |
| Biological Process | GO:2000241 | regulation of reproductive process                               | 19/2279 | 170/18866 | 0.676584  | 0.803372  | 0.7269195 | 19 | HDAC4/RXRA/CALR/FZR1/ARHGDB/RNASE10/AGO2/CDC25A/OVOL1/DEFB1/STK3/LHFPL2/PPP2R1A/PLCB1/NOTCH1/NPPC/INHBA/NODAL/LIF |
| Biological Process | GO:0006405 | RNA export from nucleus                                          | 16/2279 | 144/18866 | 0.6777236 | 0.803372  | 0.7269195 | 16 | NXF1/FIP1L1/CPSF3/SETD2/RAE1/SMG7/PABPN1/ENY2/NUP93/SEC13/SMG6/HHEX/RBM15B/NOL6/CPSF4/PCID2                       |
| Biological Process | GO:0021510 | spinal cord development                                          | 12/2279 | 109/18866 | 0.6781223 | 0.803372  | 0.7269195 | 12 | DCTN1/VIT/PHOX2A/DRGX/SUFU/LOXL3/DLL1/PAX7/NF1/NOTCH1/LMO4/ERCC2                                                  |
| Biological Process | GO:0015918 | sterol transport                                                 | 13/2279 | 118/18866 | 0.6806689 | 0.803372  | 0.7269195 | 13 | OSBPL5/PPARG/LIPC/ABCG1/PLTP/MIR27A/OSBPL6/CLU/NR1H2/ABCA1/OSBPL10/NPC1/GRAMD1A                                   |
| Biological Process | GO:0031640 | killing of cells of other organism                               | 7/2279  | 65/18866  | 0.6838023 | 0.803372  | 0.7269195 | 7  | DEFA4/AZU1/ELANE/CTSG/PGLYRP1/LTF/PGLYRP4                                                                         |
| Biological Process | GO:0031646 | positive regulation of nervous system process                    | 7/2279  | 65/18866  | 0.6838023 | 0.803372  | 0.7269195 | 7  | PRKCZ/SSH1/TNFRSF1B/BAIAP2/NRXN1/SHANK2/CUX2                                                                      |
| Biological Process | GO:0046782 | regulation of viral transcription                                | 7/2279  | 65/18866  | 0.6838023 | 0.803372  | 0.7269195 | 7  | TRIM27/CTDP1/TRIM8/POLR2F/CCL5/HDAC1/RSF1                                                                         |

|                    |            |                                                                                               |        |          |           |          |           |   |                                                          |
|--------------------|------------|-----------------------------------------------------------------------------------------------|--------|----------|-----------|----------|-----------|---|----------------------------------------------------------|
| Biological Process | GO:0051205 | protein insertion into membrane                                                               | 7/2279 | 65/18866 | 0.6838023 | 0.803372 | 0.7269195 | 7 | TFDP1/YWHAH/BMF/YWHAZ/BCL2/TP53BP2/YWHAQ                 |
| Biological Process | GO:0006977 | DNA damage response, signal transduction by p53 class mediator resulting in cell cycle arrest | 6/2279 | 56/18866 | 0.6841515 | 0.803372 | 0.7269195 | 6 | TFDP1/E2F7/PCBP4/ZNF385A/ARID3A/CHEK2                    |
| Biological Process | GO:0010665 | regulation of cardiac muscle cell apoptotic process                                           | 6/2279 | 56/18866 | 0.6841515 | 0.803372 | 0.7269195 | 6 | MIR145/MIR199A1/MIR24-2/ILK/NFE2L2/MIR199A2              |
| Biological Process | GO:0031295 | T cell costimulation                                                                          | 6/2279 | 56/18866 | 0.6841515 | 0.803372 | 0.7269195 | 6 | LCK/PIK3R1/GRAP2/TNFSF13B/PTPN6/CSK                      |
| Biological Process | GO:0035825 | homologous recombination                                                                      | 6/2279 | 56/18866 | 0.6841515 | 0.803372 | 0.7269195 | 6 | EME1/MEIOB/RNF212/DMC1/SLX4/KLHDC3                       |
| Biological Process | GO:0006073 | cellular glucan metabolic process                                                             | 8/2279 | 74/18866 | 0.6843013 | 0.803372 | 0.7269195 | 8 | PRKAG2/MGAM/DYRK2/PPP1CB/ESRRB/PER2/PCDH12/RUBCNL        |
| Biological Process | GO:0021536 | diencephalon development                                                                      | 8/2279 | 74/18866 | 0.6843013 | 0.803372 | 0.7269195 | 8 | NRP2/CREB1/ZEB2/RBPJ/NCOA1/ETS1/CDH1/ALDH1A2             |
| Biological Process | GO:0044042 | glucan metabolic process                                                                      | 8/2279 | 74/18866 | 0.6843013 | 0.803372 | 0.7269195 | 8 | PRKAG2/MGAM/DYRK2/PPP1CB/ESRRB/PER2/PCDH12/RUBCNL        |
| Biological Process | GO:2000243 | positive regulation of reproductive process                                                   | 9/2279 | 83/18866 | 0.6853635 | 0.803372 | 0.7269195 | 9 | HDAC4/RNASE10/AGO2/CDC25A/OVOL1/DEFB1/LHFPL2/PLCB1/INHBA |



|                    |            |                                                                              |         |           |           |          |           |    |                                                                                                                                |
|--------------------|------------|------------------------------------------------------------------------------|---------|-----------|-----------|----------|-----------|----|--------------------------------------------------------------------------------------------------------------------------------|
| Biological Process | GO:0048839 | inner ear development                                                        | 22/2279 | 197/18866 | 0.6858674 | 0.803372 | 0.7269195 | 22 | ABR/CEBPD/CDH23/CCM2/SLC44A4/ATP8B1/DLL1/RBPJ/LRIG1/PAX2/FGFR1/TTC39C/BMPER/LRP10/MCM2/BCR/KCNQ1/ESRRB/NOTCH1/TMC1/PDGFRB/C1QB |
| Biological Process | GO:000022  | mitotic spindle elongation                                                   | 1/2279  | 9/18866   | 0.6861817 | 0.803372 | 0.7269195 | 1  | NUMA1                                                                                                                          |
| Biological Process | GO:0001993 | regulation of systemic arterial blood pressure by norepinephrine-epinephrine | 1/2279  | 9/18866   | 0.6861817 | 0.803372 | 0.7269195 | 1  | PDE4D                                                                                                                          |
| Biological Process | GO:0002084 | protein depalmitoylation                                                     | 1/2279  | 9/18866   | 0.6861817 | 0.803372 | 0.7269195 | 1  | LYPLA2                                                                                                                         |
| Biological Process | GO:0002158 | osteoclast proliferation                                                     | 1/2279  | 9/18866   | 0.6861817 | 0.803372 | 0.7269195 | 1  | TNFAIP3                                                                                                                        |
| Biological Process | GO:0002423 | natural killer cell mediated immune response to tumor cell                   | 1/2279  | 9/18866   | 0.6861817 | 0.803372 | 0.7269195 | 1  | CD226                                                                                                                          |
| Biological Process | GO:0002645 | positive regulation of tolerance induction                                   | 1/2279  | 9/18866   | 0.6861817 | 0.803372 | 0.7269195 | 1  | TGFBR2                                                                                                                         |
| Biological Process | GO:0002855 | regulation of natural killer cell mediated immune response to tumor cell     | 1/2279  | 9/18866   | 0.6861817 | 0.803372 | 0.7269195 | 1  | CD226                                                                                                                          |
| Biological Process | GO:0002883 | regulation of hypersensitivity                                               | 1/2279  | 9/18866   | 0.6861817 | 0.803372 | 0.7269195 | 1  | FUT7                                                                                                                           |

|                    |            |                                                               |        |         |           |          |           |   |        |
|--------------------|------------|---------------------------------------------------------------|--------|---------|-----------|----------|-----------|---|--------|
| Biological Process | GO:0003056 | regulation of vascular associated smooth muscle contraction   | 1/2279 | 9/18866 | 0.6861817 | 0.803372 | 0.7269195 | 1 | P2RX1  |
| Biological Process | GO:0003266 | regulation of secondary heart field cardioblast proliferation | 1/2279 | 9/18866 | 0.6861817 | 0.803372 | 0.7269195 | 1 | NOTCH1 |
| Biological Process | GO:0003344 | pericardium morphogenesis                                     | 1/2279 | 9/18866 | 0.6861817 | 0.803372 | 0.7269195 | 1 | NOTCH1 |
| Biological Process | GO:0006198 | cAMP catabolic process                                        | 1/2279 | 9/18866 | 0.6861817 | 0.803372 | 0.7269195 | 1 | PDE4D  |
| Biological Process | GO:0006265 | DNA topological change                                        | 1/2279 | 9/18866 | 0.6861817 | 0.803372 | 0.7269195 | 1 | TOP1MT |
| Biological Process | GO:0006290 | pyrimidine dimer repair                                       | 1/2279 | 9/18866 | 0.6861817 | 0.803372 | 0.7269195 | 1 | ERCC1  |
| Biological Process | GO:0006591 | ornithine metabolic process                                   | 1/2279 | 9/18866 | 0.6861817 | 0.803372 | 0.7269195 | 1 | ODC1   |
| Biological Process | GO:0006768 | biotin metabolic process                                      | 1/2279 | 9/18866 | 0.6861817 | 0.803372 | 0.7269195 | 1 | PC     |
| Biological Process | GO:0006868 | glutamine transport                                           | 1/2279 | 9/18866 | 0.6861817 | 0.803372 | 0.7269195 | 1 | SLC1A5 |

|                    |            |                                                           |        |         |           |          |           |   |        |
|--------------------|------------|-----------------------------------------------------------|--------|---------|-----------|----------|-----------|---|--------|
| Biological Process | GO:0007021 | tubulin complex assembly                                  | 1/2279 | 9/18866 | 0.6861817 | 0.803372 | 0.7269195 | 1 | TBCD   |
| Biological Process | GO:0009215 | purine deoxyribonucleoside triphosphate metabolic process | 1/2279 | 9/18866 | 0.6861817 | 0.803372 | 0.7269195 | 1 | GUK1   |
| Biological Process | GO:0009414 | response to water deprivation                             | 1/2279 | 9/18866 | 0.6861817 | 0.803372 | 0.7269195 | 1 | CD9    |
| Biological Process | GO:0010873 | positive regulation of cholesterol esterification         | 1/2279 | 9/18866 | 0.6861817 | 0.803372 | 0.7269195 | 1 | AGTR1  |
| Biological Process | GO:0014012 | peripheral nervous system axon regeneration               | 1/2279 | 9/18866 | 0.6861817 | 0.803372 | 0.7269195 | 1 | CERS2  |
| Biological Process | GO:0014816 | skeletal muscle satellite cell differentiation            | 1/2279 | 9/18866 | 0.6861817 | 0.803372 | 0.7269195 | 1 | PAX7   |
| Biological Process | GO:0015959 | diadenosine polyphosphate metabolic process               | 1/2279 | 9/18866 | 0.6861817 | 0.803372 | 0.7269195 | 1 | NUDT3  |
| Biological Process | GO:0018243 | protein O-linked glycosylation via threonine              | 1/2279 | 9/18866 | 0.6861817 | 0.803372 | 0.7269195 | 1 | GALNT2 |
| Biological Process | GO:0019043 | establishment of viral latency                            | 1/2279 | 9/18866 | 0.6861817 | 0.803372 | 0.7269195 | 1 | BANF1  |

|                    |            |                                                       |        |         |           |          |           |   |          |
|--------------------|------------|-------------------------------------------------------|--------|---------|-----------|----------|-----------|---|----------|
| Biological Process | GO:0019236 | response to pheromone                                 | 1/2279 | 9/18866 | 0.6861817 | 0.803372 | 0.7269195 | 1 | GPR180   |
| Biological Process | GO:0019626 | short-chain fatty acid catabolic process              | 1/2279 | 9/18866 | 0.6861817 | 0.803372 | 0.7269195 | 1 | PCK2     |
| Biological Process | GO:0021612 | facial nerve structural organization                  | 1/2279 | 9/18866 | 0.6861817 | 0.803372 | 0.7269195 | 1 | NRP2     |
| Biological Process | GO:0030952 | establishment or maintenance of cytoskeleton polarity | 1/2279 | 9/18866 | 0.6861817 | 0.803372 | 0.7269195 | 1 | AQP1     |
| Biological Process | GO:0031441 | negative regulation of mRNA 3'-end processing         | 1/2279 | 9/18866 | 0.6861817 | 0.803372 | 0.7269195 | 1 | RNF40    |
| Biological Process | GO:0031642 | negative regulation of myelination                    | 1/2279 | 9/18866 | 0.6861817 | 0.803372 | 0.7269195 | 1 | TNFRSF21 |
| Biological Process | GO:0032610 | interleukin-1 alpha production                        | 1/2279 | 9/18866 | 0.6861817 | 0.803372 | 0.7269195 | 1 | IL16     |
| Biological Process | GO:0032782 | bile acid secretion                                   | 1/2279 | 9/18866 | 0.6861817 | 0.803372 | 0.7269195 | 1 | SLC51A   |
| Biological Process | GO:0033080 | immature T cell proliferation in thymus               | 1/2279 | 9/18866 | 0.6861817 | 0.803372 | 0.7269195 | 1 | TMEM131L |

|                    |            |                                                         |        |         |           |          |           |   |       |
|--------------------|------------|---------------------------------------------------------|--------|---------|-----------|----------|-----------|---|-------|
| Biological Process | GO:0033240 | positive regulation of cellular amine metabolic process | 1/2279 | 9/18866 | 0.6861817 | 0.803372 | 0.7269195 | 1 | COMT  |
| Biological Process | GO:0033625 | positive regulation of integrin activation              | 1/2279 | 9/18866 | 0.6861817 | 0.803372 | 0.7269195 | 1 | RAP1B |
| Biological Process | GO:0034720 | histone H3-K4 demethylation                             | 1/2279 | 9/18866 | 0.6861817 | 0.803372 | 0.7269195 | 1 | KDM1B |
| Biological Process | GO:0035247 | peptidyl-arginine omega-N-methylation                   | 1/2279 | 9/18866 | 0.6861817 | 0.803372 | 0.7269195 | 1 | PRMT2 |
| Biological Process | GO:0035562 | negative regulation of chromatin binding                | 1/2279 | 9/18866 | 0.6861817 | 0.803372 | 0.7269195 | 1 | FBH1  |
| Biological Process | GO:0035672 | oligopeptide transmembrane transport                    | 1/2279 | 9/18866 | 0.6861817 | 0.803372 | 0.7269195 | 1 | ABCC1 |
| Biological Process | GO:0038155 | interleukin-23-mediated signaling pathway               | 1/2279 | 9/18866 | 0.6861817 | 0.803372 | 0.7269195 | 1 | P4HB  |
| Biological Process | GO:0042420 | dopamine catabolic process                              | 1/2279 | 9/18866 | 0.6861817 | 0.803372 | 0.7269195 | 1 | COMT  |
| Biological Process | GO:0042473 | outer ear morphogenesis                                 | 1/2279 | 9/18866 | 0.6861817 | 0.803372 | 0.7269195 | 1 | FGFR1 |

|                    |            |                                                                              |        |         |           |          |           |   |  |        |
|--------------------|------------|------------------------------------------------------------------------------|--------|---------|-----------|----------|-----------|---|--|--------|
| Biological Process | GO:0042748 | circadian sleep/wake cycle, non-REM sleep                                    | 1/2279 | 9/18866 | 0.6861817 | 0.803372 | 0.7269195 | 1 |  | GHRL   |
| Biological Process | GO:0042996 | regulation of Golgi to plasma membrane protein transport                     | 1/2279 | 9/18866 | 0.6861817 | 0.803372 | 0.7269195 | 1 |  | CSK    |
| Biological Process | GO:0044359 | modulation of molecular function in other organism                           | 1/2279 | 9/18866 | 0.6861817 | 0.803372 | 0.7269195 | 1 |  | SFTPD  |
| Biological Process | GO:0044851 | hair cycle phase                                                             | 1/2279 | 9/18866 | 0.6861817 | 0.803372 | 0.7269195 | 1 |  | CDH3   |
| Biological Process | GO:0045586 | regulation of gamma-delta T cell differentiation                             | 1/2279 | 9/18866 | 0.6861817 | 0.803372 | 0.7269195 | 1 |  | PTPRC  |
| Biological Process | GO:0045656 | negative regulation of monocyte differentiation                              | 1/2279 | 9/18866 | 0.6861817 | 0.803372 | 0.7269195 | 1 |  | INPP5D |
| Biological Process | GO:0045714 | regulation of low-density lipoprotein particle receptor biosynthetic process | 1/2279 | 9/18866 | 0.6861817 | 0.803372 | 0.7269195 | 1 |  | ITGB3  |
| Biological Process | GO:0046085 | adenosine metabolic process                                                  | 1/2279 | 9/18866 | 0.6861817 | 0.803372 | 0.7269195 | 1 |  | ACP3   |
| Biological Process | GO:0046532 | regulation of photoreceptor cell differentiation                             | 1/2279 | 9/18866 | 0.6861817 | 0.803372 | 0.7269195 | 1 |  | NOTCH1 |

|                    |            |                                                                 |        |         |           |          |           |   |        |
|--------------------|------------|-----------------------------------------------------------------|--------|---------|-----------|----------|-----------|---|--------|
| Biological Process | GO:0048149 | behavioral response to ethanol                                  | 1/2279 | 9/18866 | 0.6861817 | 0.803372 | 0.7269195 | 1 | CRHBP  |
| Biological Process | GO:0048387 | negative regulation of retinoic acid receptor signaling pathway | 1/2279 | 9/18866 | 0.6861817 | 0.803372 | 0.7269195 | 1 | CALR   |
| Biological Process | GO:0048617 | embryonic foregut morphogenesis                                 | 1/2279 | 9/18866 | 0.6861817 | 0.803372 | 0.7269195 | 1 | SMAD3  |
| Biological Process | GO:0048819 | regulation of hair follicle maturation                          | 1/2279 | 9/18866 | 0.6861817 | 0.803372 | 0.7269195 | 1 | CDH3   |
| Biological Process | GO:0048865 | stem cell fate commitment                                       | 1/2279 | 9/18866 | 0.6861817 | 0.803372 | 0.7269195 | 1 | NTF4   |
| Biological Process | GO:0051133 | regulation of NK T cell activation                              | 1/2279 | 9/18866 | 0.6861817 | 0.803372 | 0.7269195 | 1 | ZBTB7B |
| Biological Process | GO:0051593 | response to folic acid                                          | 1/2279 | 9/18866 | 0.6861817 | 0.803372 | 0.7269195 | 1 | GSN    |
| Biological Process | GO:0051660 | establishment of centrosome localization                        | 1/2279 | 9/18866 | 0.6861817 | 0.803372 | 0.7269195 | 1 | EZR    |
| Biological Process | GO:0052040 | modulation by symbiont of host programmed cell death            | 1/2279 | 9/18866 | 0.6861817 | 0.803372 | 0.7269195 | 1 | BCL2L1 |

|                    |            |                                                                                      |        |         |           |          |           |   |        |
|--------------------|------------|--------------------------------------------------------------------------------------|--------|---------|-----------|----------|-----------|---|--------|
| Biological Process | GO:0052205 | modulation of molecular function in other organism involved in symbiotic interaction | 1/2279 | 9/18866 | 0.6861817 | 0.803372 | 0.7269195 | 1 | SFTPD  |
| Biological Process | GO:0060050 | positive regulation of protein glycosylation                                         | 1/2279 | 9/18866 | 0.6861817 | 0.803372 | 0.7269195 | 1 | POMT2  |
| Biological Process | GO:0060054 | positive regulation of epithelial cell proliferation involved in wound healing       | 1/2279 | 9/18866 | 0.6861817 | 0.803372 | 0.7269195 | 1 | JAML   |
| Biological Process | GO:0060075 | regulation of resting membrane potential                                             | 1/2279 | 9/18866 | 0.6861817 | 0.803372 | 0.7269195 | 1 | KCNK6  |
| Biological Process | GO:0060267 | positive regulation of respiratory burst                                             | 1/2279 | 9/18866 | 0.6861817 | 0.803372 | 0.7269195 | 1 | CAMK1D |
| Biological Process | GO:0060371 | regulation of atrial cardiac muscle cell membrane depolarization                     | 1/2279 | 9/18866 | 0.6861817 | 0.803372 | 0.7269195 | 1 | GJA5   |
| Biological Process | GO:0060907 | positive regulation of macrophage cytokine production                                | 1/2279 | 9/18866 | 0.6861817 | 0.803372 | 0.7269195 | 1 | SPON2  |
| Biological Process | GO:0060982 | coronary artery morphogenesis                                                        | 1/2279 | 9/18866 | 0.6861817 | 0.803372 | 0.7269195 | 1 | NOTCH1 |
| Biological Process | GO:0061072 | iris morphogenesis                                                                   | 1/2279 | 9/18866 | 0.6861817 | 0.803372 | 0.7269195 | 1 | HIPK2  |



|                    |            |                                                                   |        |         |           |          |           |   |        |
|--------------------|------------|-------------------------------------------------------------------|--------|---------|-----------|----------|-----------|---|--------|
| Biological Process | GO:0061549 | sympathetic ganglion development                                  | 1/2279 | 9/18866 | 0.6861817 | 0.803372 | 0.7269195 | 1 | NRP2   |
| Biological Process | GO:0070255 | regulation of mucus secretion                                     | 1/2279 | 9/18866 | 0.6861817 | 0.803372 | 0.7269195 | 1 | PRKCE  |
| Biological Process | GO:0070561 | vitamin D receptor signaling pathway                              | 1/2279 | 9/18866 | 0.6861817 | 0.803372 | 0.7269195 | 1 | VDR    |
| Biological Process | GO:0071635 | negative regulation of transforming growth factor beta production | 1/2279 | 9/18866 | 0.6861817 | 0.803372 | 0.7269195 | 1 | CDH3   |
| Biological Process | GO:0072177 | mesonephric duct development                                      | 1/2279 | 9/18866 | 0.6861817 | 0.803372 | 0.7269195 | 1 | WNT11  |
| Biological Process | GO:0072217 | negative regulation of metanephros development                    | 1/2279 | 9/18866 | 0.6861817 | 0.803372 | 0.7269195 | 1 | PAX2   |
| Biological Process | GO:0085020 | protein K6-linked ubiquitination                                  | 1/2279 | 9/18866 | 0.6861817 | 0.803372 | 0.7269195 | 1 | PRKN   |
| Biological Process | GO:0090129 | positive regulation of synapse maturation                         | 1/2279 | 9/18866 | 0.6861817 | 0.803372 | 0.7269195 | 1 | NRXN1  |
| Biological Process | GO:0090160 | Golgi to lysosome transport                                       | 1/2279 | 9/18866 | 0.6861817 | 0.803372 | 0.7269195 | 1 | ANKFY1 |

|                    |            |                                                                                              |        |         |           |          |           |   |          |
|--------------------|------------|----------------------------------------------------------------------------------------------|--------|---------|-----------|----------|-----------|---|----------|
| Biological Process | GO:0090281 | negative regulation of calcium ion import                                                    | 1/2279 | 9/18866 | 0.6861817 | 0.803372 | 0.7269195 | 1 | TRIM27   |
| Biological Process | GO:0090647 | modulation of age-related behavioral decline                                                 | 1/2279 | 9/18866 | 0.6861817 | 0.803372 | 0.7269195 | 1 | APP      |
| Biological Process | GO:0098696 | regulation of neurotransmitter receptor localization to postsynaptic specialization membrane | 1/2279 | 9/18866 | 0.6861817 | 0.803372 | 0.7269195 | 1 | PRKCZ    |
| Biological Process | GO:0098792 | xenophagy                                                                                    | 1/2279 | 9/18866 | 0.6861817 | 0.803372 | 0.7269195 | 1 | WIPI2    |
| Biological Process | GO:0099022 | vesicle tethering                                                                            | 1/2279 | 9/18866 | 0.6861817 | 0.803372 | 0.7269195 | 1 | C17orf75 |
| Biological Process | GO:0099527 | postsynapse to nucleus signaling pathway                                                     | 1/2279 | 9/18866 | 0.6861817 | 0.803372 | 0.7269195 | 1 | RELA     |
| Biological Process | GO:1900122 | positive regulation of receptor binding                                                      | 1/2279 | 9/18866 | 0.6861817 | 0.803372 | 0.7269195 | 1 | PLCL1    |
| Biological Process | GO:1900227 | positive regulation of NLRP3 inflammasome complex assembly                                   | 1/2279 | 9/18866 | 0.6861817 | 0.803372 | 0.7269195 | 1 | STMP1    |
| Biological Process | GO:1901844 | regulation of cell communication by electrical coupling involved in cardiac conduction       | 1/2279 | 9/18866 | 0.6861817 | 0.803372 | 0.7269195 | 1 | PDE4D    |

|                    |            |                                                      |        |         |           |          |           |   |        |
|--------------------|------------|------------------------------------------------------|--------|---------|-----------|----------|-----------|---|--------|
| Biological Process | GO:1901978 | positive regulation of cell cycle checkpoint         | 1/2279 | 9/18866 | 0.6861817 | 0.803372 | 0.7269195 | 1 | PCID2  |
| Biological Process | GO:1903044 | protein localization to membrane raft                | 1/2279 | 9/18866 | 0.6861817 | 0.803372 | 0.7269195 | 1 | FLOT1  |
| Biological Process | GO:1903365 | regulation of fear response                          | 1/2279 | 9/18866 | 0.6861817 | 0.803372 | 0.7269195 | 1 | MEF2C  |
| Biological Process | GO:1904685 | positive regulation of metalloendopeptidase activity | 1/2279 | 9/18866 | 0.6861817 | 0.803372 | 0.7269195 | 1 | MBP    |
| Biological Process | GO:1904776 | regulation of protein localization to cell cortex    | 1/2279 | 9/18866 | 0.6861817 | 0.803372 | 0.7269195 | 1 | NUMA1  |
| Biological Process | GO:1905165 | regulation of lysosomal protein catabolic process    | 1/2279 | 9/18866 | 0.6861817 | 0.803372 | 0.7269195 | 1 | MGAT3  |
| Biological Process | GO:1905216 | positive regulation of RNA binding                   | 1/2279 | 9/18866 | 0.6861817 | 0.803372 | 0.7269195 | 1 | EIF4G1 |
| Biological Process | GO:1905709 | negative regulation of membrane permeability         | 1/2279 | 9/18866 | 0.6861817 | 0.803372 | 0.7269195 | 1 | HK2    |
| Biological Process | GO:1905770 | regulation of mesodermal cell differentiation        | 1/2279 | 9/18866 | 0.6861817 | 0.803372 | 0.7269195 | 1 | FGFR1  |

|                    |            |                                                                                         |        |         |           |          |           |   |         |
|--------------------|------------|-----------------------------------------------------------------------------------------|--------|---------|-----------|----------|-----------|---|---------|
| Biological Process | GO:1990264 | peptidyl-tyrosine dephosphorylation involved in inactivation of protein kinase activity | 1/2279 | 9/18866 | 0.6861817 | 0.803372 | 0.7269195 | 1 | DUSP3   |
| Biological Process | GO:2000096 | positive regulation of Wnt signaling pathway, planar cell polarity pathway              | 1/2279 | 9/18866 | 0.6861817 | 0.803372 | 0.7269195 | 1 | ANKRD6  |
| Biological Process | GO:2000252 | negative regulation of feeding behavior                                                 | 1/2279 | 9/18866 | 0.6861817 | 0.803372 | 0.7269195 | 1 | TTC21B  |
| Biological Process | GO:2000253 | positive regulation of feeding behavior                                                 | 1/2279 | 9/18866 | 0.6861817 | 0.803372 | 0.7269195 | 1 | GHRL    |
| Biological Process | GO:2000321 | positive regulation of T-helper 17 cell differentiation                                 | 1/2279 | 9/18866 | 0.6861817 | 0.803372 | 0.7269195 | 1 | NLRP3   |
| Biological Process | GO:2000347 | positive regulation of hepatocyte proliferation                                         | 1/2279 | 9/18866 | 0.6861817 | 0.803372 | 0.7269195 | 1 | TNFAIP3 |
| Biological Process | GO:2000501 | regulation of natural killer cell chemotaxis                                            | 1/2279 | 9/18866 | 0.6861817 | 0.803372 | 0.7269195 | 1 | CCL5    |
| Biological Process | GO:2000508 | regulation of dendritic cell chemotaxis                                                 | 1/2279 | 9/18866 | 0.6861817 | 0.803372 | 0.7269195 | 1 | CALR    |
| Biological Process | GO:2000562 | negative regulation of CD4-positive, alpha-beta T cell proliferation                    | 1/2279 | 9/18866 | 0.6861817 | 0.803372 | 0.7269195 | 1 | VSIR    |

|                    |            |                                                                     |        |          |           |          |           |   |              |
|--------------------|------------|---------------------------------------------------------------------|--------|----------|-----------|----------|-----------|---|--------------|
| Biological Process | GO:2000674 | regulation of type B pancreatic cell apoptotic process              | 1/2279 | 9/18866  | 0.6861817 | 0.803372 | 0.7269195 | 1 | TCF7L2       |
| Biological Process | GO:2000822 | regulation of behavioral fear response                              | 1/2279 | 9/18866  | 0.6861817 | 0.803372 | 0.7269195 | 1 | MEF2C        |
| Biological Process | GO:2000833 | positive regulation of steroid hormone secretion                    | 1/2279 | 9/18866  | 0.6861817 | 0.803372 | 0.7269195 | 1 | GHRL         |
| Biological Process | GO:2000849 | regulation of glucocorticoid secretion                              | 1/2279 | 9/18866  | 0.6861817 | 0.803372 | 0.7269195 | 1 | GHRL         |
| Biological Process | GO:0006704 | glucocorticoid biosynthetic process                                 | 2/2279 | 19/18866 | 0.6873604 | 0.803372 | 0.7269195 | 2 | DGKQ/HSD11B2 |
| Biological Process | GO:0010744 | positive regulation of macrophage derived foam cell differentiation | 2/2279 | 19/18866 | 0.6873604 | 0.803372 | 0.7269195 | 2 | PRKCH/AGTR1  |
| Biological Process | GO:0030011 | maintenance of cell polarity                                        | 2/2279 | 19/18866 | 0.6873604 | 0.803372 | 0.7269195 | 2 | WNT11/WDR1   |
| Biological Process | GO:0030150 | protein import into mitochondrial matrix                            | 2/2279 | 19/18866 | 0.6873604 | 0.803372 | 0.7269195 | 2 | PAM16/TIMM44 |
| Biological Process | GO:0031445 | regulation of heterochromatin assembly                              | 2/2279 | 19/18866 | 0.6873604 | 0.803372 | 0.7269195 | 2 | ATF7IP/DNMT1 |

|                    |            |                                                        |        |          |           |          |           |   |               |
|--------------------|------------|--------------------------------------------------------|--------|----------|-----------|----------|-----------|---|---------------|
| Biological Process | GO:0032095 | regulation of response to food                         | 2/2279 | 19/18866 | 0.6873604 | 0.803372 | 0.7269195 | 2 | GHRL/NPY      |
| Biological Process | GO:0032239 | regulation of nucleobase-containing compound transport | 2/2279 | 19/18866 | 0.6873604 | 0.803372 | 0.7269195 | 2 | SETD2/RIPK1   |
| Biological Process | GO:0035269 | protein O-linked mannosylation                         | 2/2279 | 19/18866 | 0.6873604 | 0.803372 | 0.7269195 | 2 | POMT2/B4GAT1  |
| Biological Process | GO:0035338 | long-chain fatty-acyl-CoA biosynthetic process         | 2/2279 | 19/18866 | 0.6873604 | 0.803372 | 0.7269195 | 2 | ACSL1/ACSF3   |
| Biological Process | GO:0036342 | post-anal tail morphogenesis                           | 2/2279 | 19/18866 | 0.6873604 | 0.803372 | 0.7269195 | 2 | CHST11/TMED2  |
| Biological Process | GO:0042693 | muscle cell fate commitment                            | 2/2279 | 19/18866 | 0.6873604 | 0.803372 | 0.7269195 | 2 | RBPJ/MEF2C    |
| Biological Process | GO:0046485 | ether lipid metabolic process                          | 2/2279 | 19/18866 | 0.6873604 | 0.803372 | 0.7269195 | 2 | CHPT1/PEDS1   |
| Biological Process | GO:0051546 | keratinocyte migration                                 | 2/2279 | 19/18866 | 0.6873604 | 0.803372 | 0.7269195 | 2 | LTB4R2/IQSEC1 |
| Biological Process | GO:0055003 | cardiac myofibril assembly                             | 2/2279 | 19/18866 | 0.6873604 | 0.803372 | 0.7269195 | 2 | TTN/PDGFRB    |

|                    |            |                                                                                          |        |          |           |          |           |   |              |
|--------------------|------------|------------------------------------------------------------------------------------------|--------|----------|-----------|----------|-----------|---|--------------|
| Biological Process | GO:0061081 | positive regulation of myeloid leukocyte cytokine production involved in immune response | 2/2279 | 19/18866 | 0.6873604 | 0.803372 | 0.7269195 | 2 | SPON2/BCL10  |
| Biological Process | GO:0070989 | oxidative demethylation                                                                  | 2/2279 | 19/18866 | 0.6873604 | 0.803372 | 0.7269195 | 2 | FTO/TET2     |
| Biological Process | GO:0072074 | kidney mesenchyme development                                                            | 2/2279 | 19/18866 | 0.6873604 | 0.803372 | 0.7269195 | 2 | PAX2/PDGFRB  |
| Biological Process | GO:0072077 | renal vesicle morphogenesis                                                              | 2/2279 | 19/18866 | 0.6873604 | 0.803372 | 0.7269195 | 2 | PAX2/LIF     |
| Biological Process | GO:0090670 | RNA localization to Cajal body                                                           | 2/2279 | 19/18866 | 0.6873604 | 0.803372 | 0.7269195 | 2 | RUVBL1/CCT6A |
| Biological Process | GO:0090671 | telomerase RNA localization to Cajal body                                                | 2/2279 | 19/18866 | 0.6873604 | 0.803372 | 0.7269195 | 2 | RUVBL1/CCT6A |
| Biological Process | GO:0090672 | telomerase RNA localization                                                              | 2/2279 | 19/18866 | 0.6873604 | 0.803372 | 0.7269195 | 2 | RUVBL1/CCT6A |
| Biological Process | GO:0090685 | RNA localization to nucleus                                                              | 2/2279 | 19/18866 | 0.6873604 | 0.803372 | 0.7269195 | 2 | RUVBL1/CCT6A |
| Biological Process | GO:1900424 | regulation of defense response to bacterium                                              | 2/2279 | 19/18866 | 0.6873604 | 0.803372 | 0.7269195 | 2 | FOXP1/GRN    |

|                    |            |                                                    |         |           |           |           |           |    |                                                                               |
|--------------------|------------|----------------------------------------------------|---------|-----------|-----------|-----------|-----------|----|-------------------------------------------------------------------------------|
| Biological Process | GO:2000647 | negative regulation of stem cell proliferation     | 2/2279  | 19/18866  | 0.6873604 | 0.803372  | 0.7269195 | 2  | OVOL1/NF1                                                                     |
| Biological Process | GO:2000757 | negative regulation of peptidyl-lysine acetylation | 2/2279  | 19/18866  | 0.6873604 | 0.803372  | 0.7269195 | 2  | CTBP1/PIH1D1                                                                  |
| Biological Process | GO:0007215 | glutamate receptor signaling pathway               | 11/2279 | 101/18866 | 0.6885282 | 0.8046379 | 0.7280649 | 11 | CCR2/APP/GRIK4/CRHBP/CNIH2/PLCB1/MAPK8IP2/GSG1L/MEF2C/SHANK2/GRID1            |
| Biological Process | GO:0002385 | mucosal immune response                            | 4/2279  | 38/18866  | 0.6897537 | 0.8055747 | 0.7289126 | 4  | DEFA4/RNASE3/DEFB1/LTF                                                        |
| Biological Process | GO:0006298 | mismatch repair                                    | 4/2279  | 38/18866  | 0.6897537 | 0.8055747 | 0.7289126 | 4  | SETD2/ERCC1/MUTYH/POLD3                                                       |
| Biological Process | GO:0006862 | nucleotide transport                               | 4/2279  | 38/18866  | 0.6897537 | 0.8055747 | 0.7289126 | 4  | SLC25A25/SLC33A1/ABCC11/SLC25A1                                               |
| Biological Process | GO:0043029 | T cell homeostasis                                 | 4/2279  | 38/18866  | 0.6897537 | 0.8055747 | 0.7289126 | 4  | RIPK3/ZC3H8/BCL2/FADD                                                         |
| Biological Process | GO:0097064 | ncRNA export from nucleus                          | 4/2279  | 38/18866  | 0.6897537 | 0.8055747 | 0.7289126 | 4  | RAE1/NUP93/SEC13/NOL6                                                         |
| Biological Process | GO:0090175 | regulation of establishment of planar polarity     | 12/2279 | 110/18866 | 0.6904358 | 0.8062722 | 0.7295437 | 12 | AP2A1/VANGL1/PRICKLE2/WNT11/SMURF1/PFN1/PSMF1/ARRB2/DAAM1/PSMB7/ANKRD6/PSMD13 |



|                    |            |                                                          |         |           |           |           |           |    |                                                                                                                    |
|--------------------|------------|----------------------------------------------------------|---------|-----------|-----------|-----------|-----------|----|--------------------------------------------------------------------------------------------------------------------|
| Biological Process | GO:0061351 | neural precursor cell proliferation                      | 17/2279 | 154/18866 | 0.6911343 | 0.8069887 | 0.730192  | 17 | CTSZ/NDE1/SPINT2/ZEB2/DISC1/GNAI2/ILK/FGFR1/NF1/WDR47/NUMB/ZNF335/NOTCH1/RPGRIP1/ARHGEF2/FOXO1/CX3CR1              |
| Biological Process | GO:0007127 | meiosis I                                                | 13/2279 | 119/18866 | 0.6924792 | 0.8084597 | 0.731523  | 13 | MOV10L1/BRCA2/EME1/MEIOB/RNF212/CCNA1/RAD21L1/DMC1/SLX4/TEX12/KLHDC3/PSMD13/TERB2                                  |
| Biological Process | GO:0009267 | cellular response to starvation                          | 18/2279 | 163/18866 | 0.6937533 | 0.8098476 | 0.7327789 | 18 | RPTOR/PRKAG2/MFSD2A/WIPI2/COMT/EHMT2/STK24/CLEC16A/ATG14/NFE2L2/BCL2/SLC2A1/FOXO1/SREBF1/NPRL2/PRKAA1/MARS1/RIPOR1 |
| Biological Process | GO:0006294 | nucleotide-excision repair, preincision complex assembly | 3/2279  | 29/18866  | 0.6977895 | 0.8137595 | 0.7363185 | 3  | CCNH/XPA/ERCC2                                                                                                     |
| Biological Process | GO:0007263 | nitric oxide mediated signal transduction                | 3/2279  | 29/18866  | 0.6977895 | 0.8137595 | 0.7363185 | 3  | FPR1/THBS1/NOS1AP                                                                                                  |
| Biological Process | GO:0009435 | NAD biosynthetic process                                 | 3/2279  | 29/18866  | 0.6977895 | 0.8137595 | 0.7363185 | 3  | NMNAT3/PARP10/PARP9                                                                                                |
| Biological Process | GO:0010390 | histone monoubiquitination                               | 3/2279  | 29/18866  | 0.6977895 | 0.8137595 | 0.7363185 | 3  | UHRF1/PCGF3/RNF40                                                                                                  |
| Biological Process | GO:0043032 | positive regulation of macrophage activation             | 3/2279  | 29/18866  | 0.6977895 | 0.8137595 | 0.7363185 | 3  | IL10/MIR145/THBS1                                                                                                  |
| Biological Process | GO:0055075 | potassium ion homeostasis                                | 3/2279  | 29/18866  | 0.6977895 | 0.8137595 | 0.7363185 | 3  | KCTD7/SLC12A1/SLC12A7                                                                                              |

|                    |            |                                                                                 |        |          |           |           |           |   |                                                  |
|--------------------|------------|---------------------------------------------------------------------------------|--------|----------|-----------|-----------|-----------|---|--------------------------------------------------|
| Biological Process | GO:0080154 | regulation of fertilization                                                     | 3/2279 | 29/18866 | 0.6977895 | 0.8137595 | 0.7363185 | 3 | RNASE10/LHFPL2/PLCB1                             |
| Biological Process | GO:1901017 | negative regulation of potassium ion transmembrane transporter activity         | 3/2279 | 29/18866 | 0.6977895 | 0.8137595 | 0.7363185 | 3 | KCNE1/CASQ2/CAB39                                |
| Biological Process | GO:0001707 | mesoderm formation                                                              | 8/2279 | 75/18866 | 0.6989649 | 0.8149301 | 0.7373777 | 8 | MIR145/SMAD3/WNT11/PAX2/FGFR1/ITGB3/INHBA/NODAL  |
| Biological Process | GO:0050805 | negative regulation of synaptic transmission                                    | 8/2279 | 75/18866 | 0.6989649 | 0.8149301 | 0.7373777 | 8 | SORCS2/RAP1B/GNAI2/NF1/CNR2/S1PR2/SHANK2/PRKN    |
| Biological Process | GO:0008652 | cellular amino acid biosynthetic process                                        | 9/2279 | 84/18866 | 0.6992274 | 0.8151361 | 0.7375641 | 9 | GADL1/GGT1/CBS/AGXT/UPB1/MTHFD1/SLC1A3/ADI1/ASPG |
| Biological Process | GO:0046824 | positive regulation of nucleocytoplasmic transport                              | 7/2279 | 66/18866 | 0.6994049 | 0.815143  | 0.7375703 | 7 | PIK3R1/SMAD3/JUP/TCF7L2/TGFB1/CDH1/NEDD4         |
| Biological Process | GO:1902108 | regulation of mitochondrial membrane permeability involved in apoptotic process | 7/2279 | 66/18866 | 0.6994049 | 0.815143  | 0.7375703 | 7 | TFDP1/YWHAH/BMF/YWHAZ/BCL2/TP53BP2/YWHAQ         |
| Biological Process | GO:0072431 | signal transduction involved in mitotic G1 DNA damage checkpoint                | 6/2279 | 57/18866 | 0.7008785 | 0.8166601 | 0.7389431 | 6 | TFDP1/E2F7/PCBP4/ZNF385A/ARID3A/CHEK2            |
| Biological Process | GO:1902400 | intracellular signal transduction involved in G1 DNA damage checkpoint          | 6/2279 | 57/18866 | 0.7008785 | 0.8166601 | 0.7389431 | 6 | TFDP1/E2F7/PCBP4/ZNF385A/ARID3A/CHEK2            |

|                    |            |                                                                       |         |           |           |           |           |    |                                                                                                                                                                             |
|--------------------|------------|-----------------------------------------------------------------------|---------|-----------|-----------|-----------|-----------|----|-----------------------------------------------------------------------------------------------------------------------------------------------------------------------------|
| Biological Process | GO:0006821 | chloride transport                                                    | 12/2279 | 111/18866 | 0.7024639 | 0.818407  | 0.7405237 | 12 | CLCN6/FXYD1/ANO7/P2RY6/SLC26A1/SLC1A3/ANO10/ANO6/SLC12A1/ANO8/SLC12A7/PACC1                                                                                                 |
| Biological Process | GO:1901991 | negative regulation of mitotic cell cycle phase transition            | 28/2279 | 251/18866 | 0.7029504 | 0.8188734 | 0.7409458 | 28 | TRIM39/BLM/TFDP1/MAD1L1/FOXN3/PRMT2/HUS1/FBXO7/E2F7/CTDSPL/PCBP4/RIPK1/NACC2/ZNF385A/ARID3A/PSMF1/GFI1B/TAOK3/ZFYVE19/MIR138-2/CLSPN/RB1/BCL2/PSMB7/CHEK2/NAE1/PSMD13/PCID2 |
| Biological Process | GO:0046661 | male sex differentiation                                              | 18/2279 | 164/18866 | 0.7036679 | 0.8196088 | 0.7416111 | 18 | ARID5B/CSDE1/FANCA/RARA/SF1/ASB1/NCOA1/LHFPL2/NTRK1/HOXA9/RAD21L1/BCL2/PDGFRB/ERCC1/BCL2L1/HMGCS1/NCOA4/INHBA                                                               |
| Biological Process | GO:0009409 | response to cold                                                      | 5/2279  | 48/18866  | 0.7039416 | 0.8196261 | 0.7416268 | 5  | ZNF516/PPARG/FOXO1/ACADVL/PRKAA1                                                                                                                                            |
| Biological Process | GO:0032648 | regulation of interferon-beta production                              | 5/2279  | 48/18866  | 0.7039416 | 0.8196261 | 0.7416268 | 5  | TRIM38/IRF5/TLR9/TRAIP/FLOT1                                                                                                                                                |
| Biological Process | GO:0043039 | tRNA aminoacylation                                                   | 5/2279  | 48/18866  | 0.7039416 | 0.8196261 | 0.7416268 | 5  | CARS2/EARS2/MARS1/GATB/YARS1                                                                                                                                                |
| Biological Process | GO:0031111 | negative regulation of microtubule polymerization or depolymerization | 4/2279  | 39/18866  | 0.709606  | 0.8258166 | 0.7472282 | 4  | TBCD/NAV3/ARHGEF2/SPEF1                                                                                                                                                     |
| Biological Process | GO:0055090 | acylglycerol homeostasis                                              | 4/2279  | 39/18866  | 0.709606  | 0.8258166 | 0.7472282 | 4  | C1QTNF3/LIPC/MED13/ANGPTL8                                                                                                                                                  |
| Biological Process | GO:0070328 | triglyceride homeostasis                                              | 4/2279  | 39/18866  | 0.709606  | 0.8258166 | 0.7472282 | 4  | C1QTNF3/LIPC/MED13/ANGPTL8                                                                                                                                                  |

|                    |            |                                                                             |         |           |           |           |           |    |                                                                                                                                |
|--------------------|------------|-----------------------------------------------------------------------------|---------|-----------|-----------|-----------|-----------|----|--------------------------------------------------------------------------------------------------------------------------------|
| Biological Process | GO:1904706 | negative regulation of vascular associated smooth muscle cell proliferation | 4/2279  | 39/18866  | 0.709606  | 0.8258166 | 0.7472282 | 4  | IL10/PPARG/MIR140/MEF2C                                                                                                        |
| Biological Process | GO:0043484 | regulation of RNA splicing                                                  | 17/2279 | 156/18866 | 0.7113942 | 0.8277962 | 0.7490194 | 17 | RBM19/ERN1/PIK3R1/SRPK2/PCBP4/AHNAK/CLK3/SF1/DAZAP1/SFSWAP/CELF2/HNRNPLL/CELF1/RBFOX3/NSRP1/RBM15B/GRSF1                       |
| Biological Process | GO:0030641 | regulation of cellular pH                                                   | 10/2279 | 94/18866  | 0.7128039 | 0.8290863 | 0.7501867 | 10 | TM9SF4/SLC11A1/ATP6V1B2/GRN/BCL2/ATP6V0B/UBE3A/CLN5/ATP6V0C/ATP6V1C1                                                           |
| Biological Process | GO:1905954 | positive regulation of lipid localization                                   | 10/2279 | 94/18866  | 0.7128039 | 0.8290863 | 0.7501867 | 10 | EHD1/MYB/MAP2K6/ABCG1/ATP8A1/PLTP/NR1H2/GHRL/ABCA1/ACACB                                                                       |
| Biological Process | GO:0017038 | protein import                                                              | 22/2279 | 200/18866 | 0.7129062 | 0.8290863 | 0.7501867 | 22 | ANGPT1/PAM16/PIK3R1/SMAD3/TNPO1/MBTPS1/E2F3/SUFU/IPO13/FAM53B/JUP/CLU/TGFB1/NF1/NUP93/PEX26/ARNTL/CDH1/SNUPN/TIMM44/CABP1/TSC2 |
| Biological Process | GO:0072091 | regulation of stem cell proliferation                                       | 8/2279  | 76/18866  | 0.7131833 | 0.8290863 | 0.7501867 | 8  | DISC1/OVOL1/NF1/PTPRC/ZNF335/NOTCH1/KAT7/CX3CR1                                                                                |
| Biological Process | GO:0051965 | positive regulation of synapse assembly                                     | 7/2279  | 67/18866  | 0.7144936 | 0.8290863 | 0.7501867 | 7  | EPHB3/SEMA4A/SEMA4D/NRXN1/GHRL/NTRK1/CUX2                                                                                      |
| Biological Process | GO:0001832 | blastocyst growth                                                           | 2/2279  | 20/18866  | 0.7146907 | 0.8290863 | 0.7501867 | 2  | BRCA2/NDEL1                                                                                                                    |
| Biological Process | GO:0002320 | lymphoid progenitor cell differentiation                                    | 2/2279  | 20/18866  | 0.7146907 | 0.8290863 | 0.7501867 | 2  | BCL2/NOTCH1                                                                                                                    |

|                    |            |                                             |        |          |           |           |           |   |                 |
|--------------------|------------|---------------------------------------------|--------|----------|-----------|-----------|-----------|---|-----------------|
| Biological Process | GO:0002689 | negative regulation of leukocyte chemotaxis | 2/2279 | 20/18866 | 0.7146907 | 0.8290863 | 0.7501867 | 2 | PADI2/CSAR2     |
| Biological Process | GO:0007350 | blastoderm segmentation                     | 2/2279 | 20/18866 | 0.7146907 | 0.8290863 | 0.7501867 | 2 | NRP2/PCSK6      |
| Biological Process | GO:0008356 | asymmetric cell division                    | 2/2279 | 20/18866 | 0.7146907 | 0.8290863 | 0.7501867 | 2 | ZBTB16/ARHGEF2  |
| Biological Process | GO:0009264 | deoxyribonucleotide catabolic process       | 2/2279 | 20/18866 | 0.7146907 | 0.8290863 | 0.7501867 | 2 | UNG/NTHL1       |
| Biological Process | GO:0010002 | cardioblast differentiation                 | 2/2279 | 20/18866 | 0.7146907 | 0.8290863 | 0.7501867 | 2 | RBPJ/NOTCH1     |
| Biological Process | GO:0030903 | notochord development                       | 2/2279 | 20/18866 | 0.7146907 | 0.8290863 | 0.7501867 | 2 | WNT11/TEAD2     |
| Biological Process | GO:0032986 | protein-DNA complex disassembly             | 2/2279 | 20/18866 | 0.7146907 | 0.8290863 | 0.7501867 | 2 | SMARCD1/SMARCD2 |
| Biological Process | GO:0035493 | SNARE complex assembly                      | 2/2279 | 20/18866 | 0.7146907 | 0.8290863 | 0.7501867 | 2 | UVRAG/VPS18     |
| Biological Process | GO:0045056 | transcytosis                                | 2/2279 | 20/18866 | 0.7146907 | 0.8290863 | 0.7501867 | 2 | MFSD2A/IGF1R    |

|                    |            |                                                              |         |           |           |           |           |    |                                                                                       |
|--------------------|------------|--------------------------------------------------------------|---------|-----------|-----------|-----------|-----------|----|---------------------------------------------------------------------------------------|
| Biological Process | GO:0060231 | mesenchymal to epithelial transition                         | 2/2279  | 20/18866  | 0.7146907 | 0.8290863 | 0.7501867 | 2  | PAX2/LIF                                                                              |
| Biological Process | GO:0070262 | peptidyl-serine dephosphorylation                            | 2/2279  | 20/18866  | 0.7146907 | 0.8290863 | 0.7501867 | 2  | PPP2R1A/PPP1R16B                                                                      |
| Biological Process | GO:0071243 | cellular response to arsenic-containing substance            | 2/2279  | 20/18866  | 0.7146907 | 0.8290863 | 0.7501867 | 2  | GSTO1/GSTO2                                                                           |
| Biological Process | GO:0072087 | renal vesicle development                                    | 2/2279  | 20/18866  | 0.7146907 | 0.8290863 | 0.7501867 | 2  | PAX2/LIF                                                                              |
| Biological Process | GO:2001169 | regulation of ATP biosynthetic process                       | 2/2279  | 20/18866  | 0.7146907 | 0.8290863 | 0.7501867 | 2  | ENO1/SPHK2                                                                            |
| Biological Process | GO:0098661 | inorganic anion transmembrane transport                      | 13/2279 | 121/18866 | 0.7153056 | 0.8290863 | 0.7501867 | 13 | CLCN6/FXYD1/ANO7/SLC13A4/SLC26A1/SLC37A1/SLC1A3/ANO10/ANO6/SLC12A1/ANO8/SLC12A7/PACC1 |
| Biological Process | GO:0010662 | regulation of striated muscle cell apoptotic process         | 6/2279  | 58/18866  | 0.7169981 | 0.8290863 | 0.7501867 | 6  | MIR145/MIR199A1/MIR24-2/ILK/NFE2L2/MIR199A2                                           |
| Biological Process | GO:0043489 | RNA stabilization                                            | 6/2279  | 58/18866  | 0.7169981 | 0.8290863 | 0.7501867 | 6  | SLC11A1/LARP1/PAIP1/SYNCRIP/TENT5C/TENT5A                                             |
| Biological Process | GO:1900408 | negative regulation of cellular response to oxidative stress | 6/2279  | 58/18866  | 0.7169981 | 0.8290863 | 0.7501867 | 6  | IL10/FBXO7/NOL3/NFE2L2/BAG5/PRKN                                                      |

|                    |            |                                                                   |         |           |           |           |           |    |                                                                                                                                                      |
|--------------------|------------|-------------------------------------------------------------------|---------|-----------|-----------|-----------|-----------|----|------------------------------------------------------------------------------------------------------------------------------------------------------|
| Biological Process | GO:1903202 | negative regulation of oxidative stress-induced cell death        | 6/2279  | 58/18866  | 0.7169981 | 0.8290863 | 0.7501867 | 6  | IL10/FBXO7/NOL3/NFE2L2/BAG5/PRKN                                                                                                                     |
| Biological Process | GO:0006338 | chromatin remodeling                                              | 24/2279 | 218/18866 | 0.7174736 | 0.8290863 | 0.7501867 | 24 | HDAC4/CECR2/BAZ1B/KDM4B/SRCAP/MYB/SMARCA2/HDAC1/PAX7/ARID1B/ATF7IP/KDM4C/RSF1/MTA2/SMARCD1/SMARCD2/RB1/DNMT1/PIH1D1/CHD8/CENPM/ZNF1/RUVBL1/H3C1      |
| Biological Process | GO:0071805 | potassium ion transmembrane transport                             | 24/2279 | 218/18866 | 0.7174736 | 0.8290863 | 0.7501867 | 24 | KCNJ15/KCNE1/KCNAB2/CASQ2/WWP2/FXYD2/SLC24A4/DNM2/KCNN1/KCNQ2/BIN1/NOS1AP/KCNIP1/KCNK6/AQP1/CAB39/KCNQ1/SLC1A3/ABCB8/NEDD4/ANO6/ANK2/SLC12A1/SLC12A7 |
| Biological Process | GO:0005979 | regulation of glycogen biosynthetic process                       | 3/2279  | 30/18866  | 0.7199382 | 0.8290863 | 0.7501867 | 3  | DYRK2/PPP1CB/ESRRB                                                                                                                                   |
| Biological Process | GO:0007176 | regulation of epidermal growth factor-activated receptor activity | 3/2279  | 30/18866  | 0.7199382 | 0.8290863 | 0.7501867 | 3  | TGFA/NCK2/APP                                                                                                                                        |
| Biological Process | GO:0010962 | regulation of glucan biosynthetic process                         | 3/2279  | 30/18866  | 0.7199382 | 0.8290863 | 0.7501867 | 3  | DYRK2/PPP1CB/ESRRB                                                                                                                                   |
| Biological Process | GO:0031116 | positive regulation of microtubule polymerization                 | 3/2279  | 30/18866  | 0.7199382 | 0.8290863 | 0.7501867 | 3  | DCTN1/NAV3/NUMA1                                                                                                                                     |
| Biological Process | GO:0032728 | positive regulation of interferon-beta production                 | 3/2279  | 30/18866  | 0.7199382 | 0.8290863 | 0.7501867 | 3  | IRF5/TLR9/FLOT1                                                                                                                                      |
| Biological Process | GO:0035666 | TRIF-dependent toll-like receptor signaling pathway               | 3/2279  | 30/18866  | 0.7199382 | 0.8290863 | 0.7501867 | 3  | RIPK1/UBE2D2/FADD                                                                                                                                    |

|                    |            |                                                      |        |          |           |           |           |   |                      |
|--------------------|------------|------------------------------------------------------|--------|----------|-----------|-----------|-----------|---|----------------------|
| Biological Process | GO:0036475 | neuron death in response to oxidative stress         | 3/2279 | 30/18866 | 0.7199382 | 0.8290863 | 0.7501867 | 3 | IL10/FBXO7/PRKN      |
| Biological Process | GO:0038111 | interleukin-7-mediated signaling pathway             | 3/2279 | 30/18866 | 0.7199382 | 0.8290863 | 0.7501867 | 3 | STAT5A/JAK1/H3C1     |
| Biological Process | GO:0044030 | regulation of DNA methylation                        | 3/2279 | 30/18866 | 0.7199382 | 0.8290863 | 0.7501867 | 3 | KDM1B/GRHL2/MORC1    |
| Biological Process | GO:0061082 | myeloid leukocyte cytokine production                | 3/2279 | 30/18866 | 0.7199382 | 0.8290863 | 0.7501867 | 3 | SPON2/TGFB1/BCL10    |
| Biological Process | GO:0070168 | negative regulation of biomineral tissue development | 3/2279 | 30/18866 | 0.7199382 | 0.8290863 | 0.7501867 | 3 | TGFB1/NOTCH1/RFLNA   |
| Biological Process | GO:0070198 | protein localization to chromosome, telomeric region | 3/2279 | 30/18866 | 0.7199382 | 0.8290863 | 0.7501867 | 3 | TNKS/BRCA2/CCT6A     |
| Biological Process | GO:0071480 | cellular response to gamma radiation                 | 3/2279 | 30/18866 | 0.7199382 | 0.8290863 | 0.7501867 | 3 | CHEK2/BCL2L1/MAP3K20 |
| Biological Process | GO:0090162 | establishment of epithelial cell polarity            | 3/2279 | 30/18866 | 0.7199382 | 0.8290863 | 0.7501867 | 3 | FRMD4A/MYO18A/FRMD4B |
| Biological Process | GO:0110150 | negative regulation of biomineralization             | 3/2279 | 30/18866 | 0.7199382 | 0.8290863 | 0.7501867 | 3 | TGFB1/NOTCH1/RFLNA   |



|                    |            |                                                                         |        |          |           |           |           |   |                                      |
|--------------------|------------|-------------------------------------------------------------------------|--------|----------|-----------|-----------|-----------|---|--------------------------------------|
| Biological Process | GO:0120033 | negative regulation of plasma membrane bounded cell projection assembly | 3/2279 | 30/18866 | 0.7199382 | 0.8290863 | 0.7501867 | 3 | TACSTD2/KANK1/DNM2                   |
| Biological Process | GO:1902751 | positive regulation of cell cycle G2/M phase transition                 | 3/2279 | 30/18866 | 0.7199382 | 0.8290863 | 0.7501867 | 3 | BRD4/APP/CDC25A                      |
| Biological Process | GO:1903205 | regulation of hydrogen peroxide-induced cell death                      | 3/2279 | 30/18866 | 0.7199382 | 0.8290863 | 0.7501867 | 3 | IL10/RIPK1/NFE2L2                    |
| Biological Process | GO:2000765 | regulation of cytoplasmic translation                                   | 3/2279 | 30/18866 | 0.7199382 | 0.8290863 | 0.7501867 | 3 | ZNF385A/CPEB3/PKM                    |
| Biological Process | GO:0006692 | prostanoid metabolic process                                            | 5/2279 | 49/18866 | 0.7213072 | 0.8290863 | 0.7501867 | 5 | ABHD16A/TNFRSF1A/LYPLA2/ZADH2/PRXL2B |
| Biological Process | GO:0006693 | prostaglandin metabolic process                                         | 5/2279 | 49/18866 | 0.7213072 | 0.8290863 | 0.7501867 | 5 | ABHD16A/TNFRSF1A/LYPLA2/ZADH2/PRXL2B |
| Biological Process | GO:0034656 | nucleobase-containing small molecule catabolic process                  | 5/2279 | 49/18866 | 0.7213072 | 0.8290863 | 0.7501867 | 5 | CDA/DPYS/ENTPD1/UPB1/PNP             |
| Biological Process | GO:0043038 | amino acid activation                                                   | 5/2279 | 49/18866 | 0.7213072 | 0.8290863 | 0.7501867 | 5 | CARS2/EARS2/MARS1/GATB/YARS1         |
| Biological Process | GO:0048512 | circadian behavior                                                      | 5/2279 | 49/18866 | 0.7213072 | 0.8290863 | 0.7501867 | 5 | ZFHX3/MTA1/GHRL/USP2/NCOA2           |

|                    |            |                                                                                                             |        |          |           |           |           |   |                                         |
|--------------------|------------|-------------------------------------------------------------------------------------------------------------|--------|----------|-----------|-----------|-----------|---|-----------------------------------------|
| Biological Process | GO:0090051 | negative regulation of cell migration involved in sprouting angiogenesis                                    | 5/2279 | 49/18866 | 0.7213072 | 0.8290863 | 0.7501867 | 5 | ITGB1BP1/MIR199A1/THBS1/MIR199A2/NOTCH1 |
| Biological Process | GO:1900087 | positive regulation of G1/S transition of mitotic cell cycle                                                | 5/2279 | 49/18866 | 0.7213072 | 0.8290863 | 0.7501867 | 5 | RPTOR/TFDP1/PLCB1/PLRG1/EIF4G1          |
| Biological Process | GO:0000290 | deadenylation-dependent decapping of nuclear-transcribed mRNA                                               | 1/2279 | 10/18866 | 0.7241089 | 0.8290863 | 0.7501867 | 1 | LSM1                                    |
| Biological Process | GO:0001553 | luteinization                                                                                               | 1/2279 | 10/18866 | 0.7241089 | 0.8290863 | 0.7501867 | 1 | INHBA                                   |
| Biological Process | GO:0001660 | fever generation                                                                                            | 1/2279 | 10/18866 | 0.7241089 | 0.8290863 | 0.7501867 | 1 | TNF                                     |
| Biological Process | GO:0002291 | T cell activation via T cell receptor contact with antigen bound to MHC molecule on antigen presenting cell | 1/2279 | 10/18866 | 0.7241089 | 0.8290863 | 0.7501867 | 1 | HLA-DMB                                 |
| Biological Process | GO:0002524 | hypersensitivity                                                                                            | 1/2279 | 10/18866 | 0.7241089 | 0.8290863 | 0.7501867 | 1 | FUT7                                    |
| Biological Process | GO:0003129 | heart induction                                                                                             | 1/2279 | 10/18866 | 0.7241089 | 0.8290863 | 0.7501867 | 1 | WNT11                                   |
| Biological Process | GO:0006188 | IMP biosynthetic process                                                                                    | 1/2279 | 10/18866 | 0.7241089 | 0.8290863 | 0.7501867 | 1 | AMPD3                                   |

|                    |            |                                                                      |        |          |           |           |           |   |         |
|--------------------|------------|----------------------------------------------------------------------|--------|----------|-----------|-----------|-----------|---|---------|
| Biological Process | GO:0006307 | DNA dealkylation involved in DNA repair                              | 1/2279 | 10/18866 | 0.7241089 | 0.8290863 | 0.7501867 | 1 | FTO     |
| Biological Process | GO:0006560 | proline metabolic process                                            | 1/2279 | 10/18866 | 0.7241089 | 0.8290863 | 0.7501867 | 1 | ALDH4A1 |
| Biological Process | GO:0006930 | substrate-dependent cell migration, cell extension                   | 1/2279 | 10/18866 | 0.7241089 | 0.8290863 | 0.7501867 | 1 | CTTN    |
| Biological Process | GO:0007168 | receptor guanylyl cyclase signaling pathway                          | 1/2279 | 10/18866 | 0.7241089 | 0.8290863 | 0.7501867 | 1 | NPPC    |
| Biological Process | GO:0010269 | response to selenium ion                                             | 1/2279 | 10/18866 | 0.7241089 | 0.8290863 | 0.7501867 | 1 | SELENOV |
| Biological Process | GO:0010986 | positive regulation of lipoprotein particle clearance                | 1/2279 | 10/18866 | 0.7241089 | 0.8290863 | 0.7501867 | 1 | GPLD1   |
| Biological Process | GO:0010992 | ubiquitin recycling                                                  | 1/2279 | 10/18866 | 0.7241089 | 0.8290863 | 0.7501867 | 1 | PRKN    |
| Biological Process | GO:0010998 | regulation of translational initiation by eIF2 alpha phosphorylation | 1/2279 | 10/18866 | 0.7241089 | 0.8290863 | 0.7501867 | 1 | NCK2    |
| Biological Process | GO:0014051 | gamma-aminobutyric acid secretion                                    | 1/2279 | 10/18866 | 0.7241089 | 0.8290863 | 0.7501867 | 1 | NF1     |

|                    |            |                                                           |        |          |           |           |           |   |          |
|--------------------|------------|-----------------------------------------------------------|--------|----------|-----------|-----------|-----------|---|----------|
| Biological Process | GO:0018242 | protein O-linked glycosylation via serine                 | 1/2279 | 10/18866 | 0.7241089 | 0.8290863 | 0.7501867 | 1 | GALNT2   |
| Biological Process | GO:0019062 | virion attachment to host cell                            | 1/2279 | 10/18866 | 0.7241089 | 0.8290863 | 0.7501867 | 1 | NECTIN1  |
| Biological Process | GO:0019614 | catechol-containing compound catabolic process            | 1/2279 | 10/18866 | 0.7241089 | 0.8290863 | 0.7501867 | 1 | COMT     |
| Biological Process | GO:0031943 | regulation of glucocorticoid metabolic process            | 1/2279 | 10/18866 | 0.7241089 | 0.8290863 | 0.7501867 | 1 | DGKQ     |
| Biological Process | GO:0032000 | positive regulation of fatty acid beta-oxidation          | 1/2279 | 10/18866 | 0.7241089 | 0.8290863 | 0.7501867 | 1 | CPT1A    |
| Biological Process | GO:0032025 | response to cobalt ion                                    | 1/2279 | 10/18866 | 0.7241089 | 0.8290863 | 0.7501867 | 1 | D2HGDH   |
| Biological Process | GO:0032308 | positive regulation of prostaglandin secretion            | 1/2279 | 10/18866 | 0.7241089 | 0.8290863 | 0.7501867 | 1 | MAP2K6   |
| Biological Process | GO:0032926 | negative regulation of activin receptor signaling pathway | 1/2279 | 10/18866 | 0.7241089 | 0.8290863 | 0.7501867 | 1 | SKI      |
| Biological Process | GO:0033083 | regulation of immature T cell proliferation               | 1/2279 | 10/18866 | 0.7241089 | 0.8290863 | 0.7501867 | 1 | TMEM131L |

|                    |            |                                                      |        |          |           |           |           |   |         |
|--------------------|------------|------------------------------------------------------|--------|----------|-----------|-----------|-----------|---|---------|
| Biological Process | GO:0033131 | regulation of glucokinase activity                   | 1/2279 | 10/18866 | 0.7241089 | 0.8290863 | 0.7501867 | 1 | PRKN    |
| Biological Process | GO:0034135 | regulation of toll-like receptor 2 signaling pathway | 1/2279 | 10/18866 | 0.7241089 | 0.8290863 | 0.7501867 | 1 | TNFAIP3 |
| Biological Process | GO:0034454 | microtubule anchoring at centrosome                  | 1/2279 | 10/18866 | 0.7241089 | 0.8290863 | 0.7501867 | 1 | DCTN1   |
| Biological Process | GO:0034651 | cortisol biosynthetic process                        | 1/2279 | 10/18866 | 0.7241089 | 0.8290863 | 0.7501867 | 1 | DGKQ    |
| Biological Process | GO:0034770 | histone H4-K20 methylation                           | 1/2279 | 10/18866 | 0.7241089 | 0.8290863 | 0.7501867 | 1 | NSD2    |
| Biological Process | GO:0034975 | protein folding in endoplasmic reticulum             | 1/2279 | 10/18866 | 0.7241089 | 0.8290863 | 0.7501867 | 1 | CALR    |
| Biological Process | GO:0035581 | sequestering of extracellular ligand from receptor   | 1/2279 | 10/18866 | 0.7241089 | 0.8290863 | 0.7501867 | 1 | LTBP1   |
| Biological Process | GO:0035646 | endosome to melanosome transport                     | 1/2279 | 10/18866 | 0.7241089 | 0.8290863 | 0.7501867 | 1 | AP3D1   |
| Biological Process | GO:0035878 | nail development                                     | 1/2279 | 10/18866 | 0.7241089 | 0.8290863 | 0.7501867 | 1 | PRKAB1  |

|                    |            |                                       |        |          |           |           |           |   |  |        |
|--------------------|------------|---------------------------------------|--------|----------|-----------|-----------|-----------|---|--|--------|
| Biological Process | GO:0035933 | glucocorticoid secretion              | 1/2279 | 10/18866 | 0.7241089 | 0.8290863 | 0.7501867 | 1 |  | GHRL   |
| Biological Process | GO:0042424 | catecholamine catabolic process       | 1/2279 | 10/18866 | 0.7241089 | 0.8290863 | 0.7501867 | 1 |  | COMT   |
| Biological Process | GO:0042428 | serotonin metabolic process           | 1/2279 | 10/18866 | 0.7241089 | 0.8290863 | 0.7501867 | 1 |  | DDC    |
| Biological Process | GO:0042989 | sequestering of actin monomers        | 1/2279 | 10/18866 | 0.7241089 | 0.8290863 | 0.7501867 | 1 |  | GSN    |
| Biological Process | GO:0043485 | endosome to pigment granule transport | 1/2279 | 10/18866 | 0.7241089 | 0.8290863 | 0.7501867 | 1 |  | AP3D1  |
| Biological Process | GO:0043587 | tongue morphogenesis                  | 1/2279 | 10/18866 | 0.7241089 | 0.8290863 | 0.7501867 | 1 |  | HDAC1  |
| Biological Process | GO:0044557 | relaxation of smooth muscle           | 1/2279 | 10/18866 | 0.7241089 | 0.8290863 | 0.7501867 | 1 |  | SLC8A1 |
| Biological Process | GO:0048570 | notochord morphogenesis               | 1/2279 | 10/18866 | 0.7241089 | 0.8290863 | 0.7501867 | 1 |  | WNT11  |
| Biological Process | GO:0048757 | pigment granule maturation            | 1/2279 | 10/18866 | 0.7241089 | 0.8290863 | 0.7501867 | 1 |  | AP3D1  |

|                    |            |                                                                                    |        |          |           |           |           |   |         |
|--------------------|------------|------------------------------------------------------------------------------------|--------|----------|-----------|-----------|-----------|---|---------|
| Biological Process | GO:0051342 | regulation of cyclic-nucleotide phosphodiesterase activity                         | 1/2279 | 10/18866 | 0.7241089 | 0.8290863 | 0.7501867 | 1 | AIP     |
| Biological Process | GO:0051351 | positive regulation of ligase activity                                             | 1/2279 | 10/18866 | 0.7241089 | 0.8290863 | 0.7501867 | 1 | RIPK3   |
| Biological Process | GO:0051418 | microtubule nucleation by microtubule organizing center                            | 1/2279 | 10/18866 | 0.7241089 | 0.8290863 | 0.7501867 | 1 | TUBGCP2 |
| Biological Process | GO:0052646 | alditol phosphate metabolic process                                                | 1/2279 | 10/18866 | 0.7241089 | 0.8290863 | 0.7501867 | 1 | ACP6    |
| Biological Process | GO:0060068 | vagina development                                                                 | 1/2279 | 10/18866 | 0.7241089 | 0.8290863 | 0.7501867 | 1 | TYRO3   |
| Biological Process | GO:0060600 | dichotomous subdivision of an epithelial terminal unit                             | 1/2279 | 10/18866 | 0.7241089 | 0.8290863 | 0.7501867 | 1 | CTSH    |
| Biological Process | GO:0060768 | regulation of epithelial cell proliferation involved in prostate gland development | 1/2279 | 10/18866 | 0.7241089 | 0.8290863 | 0.7501867 | 1 | NOTCH1  |
| Biological Process | GO:0060923 | cardiac muscle cell fate commitment                                                | 1/2279 | 10/18866 | 0.7241089 | 0.8290863 | 0.7501867 | 1 | RBPJ    |
| Biological Process | GO:0061303 | cornea development in camera-type eye                                              | 1/2279 | 10/18866 | 0.7241089 | 0.8290863 | 0.7501867 | 1 | LIMK2   |

|                    |            |                                                                                      |        |          |           |           |           |   |         |
|--------------------|------------|--------------------------------------------------------------------------------------|--------|----------|-----------|-----------|-----------|---|---------|
| Biological Process | GO:0070391 | response to lipoteichoic acid                                                        | 1/2279 | 10/18866 | 0.7241089 | 0.8290863 | 0.7501867 | 1 | RELA    |
| Biological Process | GO:0070424 | regulation of nucleotide-binding oligomerization domain containing signaling pathway | 1/2279 | 10/18866 | 0.7241089 | 0.8290863 | 0.7501867 | 1 | TNFAIP3 |
| Biological Process | GO:0071223 | cellular response to lipoteichoic acid                                               | 1/2279 | 10/18866 | 0.7241089 | 0.8290863 | 0.7501867 | 1 | RELA    |
| Biological Process | GO:0071233 | cellular response to leucine                                                         | 1/2279 | 10/18866 | 0.7241089 | 0.8290863 | 0.7501867 | 1 | RPTOR   |
| Biological Process | GO:0071394 | cellular response to testosterone stimulus                                           | 1/2279 | 10/18866 | 0.7241089 | 0.8290863 | 0.7501867 | 1 | NCOA4   |
| Biological Process | GO:0072070 | loop of Henle development                                                            | 1/2279 | 10/18866 | 0.7241089 | 0.8290863 | 0.7501867 | 1 | DLL1    |
| Biological Process | GO:0072203 | cell proliferation involved in metanephros development                               | 1/2279 | 10/18866 | 0.7241089 | 0.8290863 | 0.7501867 | 1 | PDGFRB  |
| Biological Process | GO:0097050 | type B pancreatic cell apoptotic process                                             | 1/2279 | 10/18866 | 0.7241089 | 0.8290863 | 0.7501867 | 1 | TCF7L2  |
| Biological Process | GO:0097250 | mitochondrial respirasome assembly                                                   | 1/2279 | 10/18866 | 0.7241089 | 0.8290863 | 0.7501867 | 1 | RAB5IF  |



|                    |            |                                                                                                   |        |          |           |           |           |   |        |
|--------------------|------------|---------------------------------------------------------------------------------------------------|--------|----------|-----------|-----------|-----------|---|--------|
| Biological Process | GO:0098935 | dendritic transport                                                                               | 1/2279 | 10/18866 | 0.7241089 | 0.8290863 | 0.7501867 | 1 | KIF5C  |
| Biological Process | GO:1900222 | negative regulation of amyloid-beta clearance                                                     | 1/2279 | 10/18866 | 0.7241089 | 0.8290863 | 0.7501867 | 1 | TNF    |
| Biological Process | GO:1900426 | positive regulation of defense response to bacterium                                              | 1/2279 | 10/18866 | 0.7241089 | 0.8290863 | 0.7501867 | 1 | GRN    |
| Biological Process | GO:1901748 | leukotriene D4 metabolic process                                                                  | 1/2279 | 10/18866 | 0.7241089 | 0.8290863 | 0.7501867 | 1 | GGT1   |
| Biological Process | GO:1901750 | leukotriene D4 biosynthetic process                                                               | 1/2279 | 10/18866 | 0.7241089 | 0.8290863 | 0.7501867 | 1 | GGT1   |
| Biological Process | GO:1902237 | positive regulation of endoplasmic reticulum stress-induced intrinsic apoptotic signaling pathway | 1/2279 | 10/18866 | 0.7241089 | 0.8290863 | 0.7501867 | 1 | NCK2   |
| Biological Process | GO:1902415 | regulation of mRNA binding                                                                        | 1/2279 | 10/18866 | 0.7241089 | 0.8290863 | 0.7501867 | 1 | EIF4G1 |
| Biological Process | GO:1902645 | tertiary alcohol biosynthetic process                                                             | 1/2279 | 10/18866 | 0.7241089 | 0.8290863 | 0.7501867 | 1 | DGKQ   |
| Biological Process | GO:1903431 | positive regulation of cell maturation                                                            | 1/2279 | 10/18866 | 0.7241089 | 0.8290863 | 0.7501867 | 1 | BCL2   |

|                    |            |                                                                                   |        |          |           |           |           |   |        |
|--------------------|------------|-----------------------------------------------------------------------------------|--------|----------|-----------|-----------|-----------|---|--------|
| Biological Process | GO:1903826 | arginine transmembrane transport                                                  | 1/2279 | 10/18866 | 0.7241089 | 0.8290863 | 0.7501867 | 1 | SLC7A1 |
| Biological Process | GO:1903897 | regulation of PERK-mediated unfolded protein response                             | 1/2279 | 10/18866 | 0.7241089 | 0.8290863 | 0.7501867 | 1 | NCK2   |
| Biological Process | GO:1904526 | regulation of microtubule binding                                                 | 1/2279 | 10/18866 | 0.7241089 | 0.8290863 | 0.7501867 | 1 | MARK2  |
| Biological Process | GO:1904779 | regulation of protein localization to centrosome                                  | 1/2279 | 10/18866 | 0.7241089 | 0.8290863 | 0.7501867 | 1 | CEP72  |
| Biological Process | GO:1904851 | positive regulation of establishment of protein localization to telomere          | 1/2279 | 10/18866 | 0.7241089 | 0.8290863 | 0.7501867 | 1 | CCT6A  |
| Biological Process | GO:1905031 | regulation of membrane repolarization during cardiac muscle cell action potential | 1/2279 | 10/18866 | 0.7241089 | 0.8290863 | 0.7501867 | 1 | NOS1AP |
| Biological Process | GO:1990416 | cellular response to brain-derived neurotrophic factor stimulus                   | 1/2279 | 10/18866 | 0.7241089 | 0.8290863 | 0.7501867 | 1 | UBE3A  |
| Biological Process | GO:2000382 | positive regulation of mesoderm development                                       | 1/2279 | 10/18866 | 0.7241089 | 0.8290863 | 0.7501867 | 1 | NODAL  |
| Biological Process | GO:2001054 | negative regulation of mesenchymal cell apoptotic process                         | 1/2279 | 10/18866 | 0.7241089 | 0.8290863 | 0.7501867 | 1 | PAX2   |

|                    |            |                                                   |         |           |           |           |           |    |                                                                                      |
|--------------------|------------|---------------------------------------------------|---------|-----------|-----------|-----------|-----------|----|--------------------------------------------------------------------------------------|
| Biological Process | GO:0045471 | response to ethanol                               | 13/2279 | 122/18866 | 0.726313  | 0.8315098 | 0.7523796 | 13 | S100A8/GSN/ITPR2/FECH/CRHBP/RARA/HTR3A/CSF3/CAT/CA3/PRKCE/NPPC/PRKAA1                |
| Biological Process | GO:0061333 | renal tubule morphogenesis                        | 8/2279  | 77/18866  | 0.7269514 | 0.8319399 | 0.7527688 | 8  | TACSTD2/ILK/WNT11/PAX2/MTSS1/BCL2/MEF2C/HOXB7                                        |
| Biological Process | GO:0072028 | nephron morphogenesis                             | 8/2279  | 77/18866  | 0.7269514 | 0.8319399 | 0.7527688 | 8  | TACSTD2/ILK/WNT11/PAX2/BCL2/PDGFRB/LIF/HOXB7                                         |
| Biological Process | GO:1903201 | regulation of oxidative stress-induced cell death | 8/2279  | 77/18866  | 0.7269514 | 0.8319399 | 0.7527688 | 8  | P4HB/IL10/FBXO7/RIPK1/NOL3/NFE2L2/BAG5/PRKN                                          |
| Biological Process | GO:0060968 | regulation of gene silencing                      | 15/2279 | 140/18866 | 0.7282863 | 0.8325247 | 0.7532979 | 15 | PPARG/NCOR2/RAE1/TNF/POLR2F/AGO1/RIPK1/LIMD1/AGO2/TGFB1/NUP93/SEC13/RMRP/EIF4G1/H3C1 |
| Biological Process | GO:0007257 | activation of JUN kinase activity                 | 4/2279  | 40/18866  | 0.7285139 | 0.8325247 | 0.7532979 | 4  | ERN1/RIPK1/DBNL/MAP3K20                                                              |
| Biological Process | GO:0008207 | C21-steroid hormone metabolic process             | 4/2279  | 40/18866  | 0.7285139 | 0.8325247 | 0.7532979 | 4  | DHRS9/AKR1D1/FDX1/DGKQ                                                               |
| Biological Process | GO:0009069 | serine family amino acid metabolic process        | 4/2279  | 40/18866  | 0.7285139 | 0.8325247 | 0.7532979 | 4  | GGT1/CBS/AGXT/MTHFD1                                                                 |
| Biological Process | GO:0010613 | positive regulation of cardiac muscle hypertrophy | 4/2279  | 40/18866  | 0.7285139 | 0.8325247 | 0.7532979 | 4  | PRKCA/MIR199A1/PDE9A/MIR199A2                                                        |

|                    |            |                                                                   |        |          |           |           |           |   |                                                 |
|--------------------|------------|-------------------------------------------------------------------|--------|----------|-----------|-----------|-----------|---|-------------------------------------------------|
| Biological Process | GO:0021587 | cerebellum morphogenesis                                          | 4/2279 | 40/18866 | 0.7285139 | 0.8325247 | 0.7532979 | 4 | DLL1/TTC21B/TLL1/COQ8B                          |
| Biological Process | GO:0040036 | regulation of fibroblast growth factor receptor signaling pathway | 4/2279 | 40/18866 | 0.7285139 | 0.8325247 | 0.7532979 | 4 | THBS1/RUNX2/FAM20C/OTX2                         |
| Biological Process | GO:0042417 | dopamine metabolic process                                        | 4/2279 | 40/18866 | 0.7285139 | 0.8325247 | 0.7532979 | 4 | COMT/DDC/ITGB2/PRKN                             |
| Biological Process | GO:0043001 | Golgi to plasma membrane protein transport                        | 4/2279 | 40/18866 | 0.7285139 | 0.8325247 | 0.7532979 | 4 | KIF13A/RAB31/VAMP5/CSK                          |
| Biological Process | GO:0045740 | positive regulation of DNA replication                            | 4/2279 | 40/18866 | 0.7285139 | 0.8325247 | 0.7532979 | 4 | E2F7/FGFR1/BCAR3/KAT7                           |
| Biological Process | GO:0072210 | metanephric nephron development                                   | 4/2279 | 40/18866 | 0.7285139 | 0.8325247 | 0.7532979 | 4 | PAX2/PDGFB/PDGFRB/LIF                           |
| Biological Process | GO:0097352 | autophagosome maturation                                          | 4/2279 | 40/18866 | 0.7285139 | 0.8325247 | 0.7532979 | 4 | UVRAG/CLEC16A/ATG14/RUBCNL                      |
| Biological Process | GO:0006625 | protein targeting to peroxisome                                   | 7/2279 | 68/18866 | 0.7290635 | 0.8325519 | 0.7533225 | 7 | AMACR/AGXT/CAT/PEX26/ACOX2/HMGCL/UBE2D2         |
| Biological Process | GO:0051298 | centrosome duplication                                            | 7/2279 | 68/18866 | 0.7290635 | 0.8325519 | 0.7533225 | 7 | ARHGEF10/NDE1/BRCA2/CEP135/POC1A/CEP72/CEP295NL |

|                    |            |                                                                  |        |          |           |           |           |   |                                               |
|--------------------|------------|------------------------------------------------------------------|--------|----------|-----------|-----------|-----------|---|-----------------------------------------------|
| Biological Process | GO:0072662 | protein localization to peroxisome                               | 7/2279 | 68/18866 | 0.7290635 | 0.8325519 | 0.7533225 | 7 | AMACR/AGXT/CAT/PEX26/ACOX2/HMGCL/UBE2D2       |
| Biological Process | GO:0072663 | establishment of protein localization to peroxisome              | 7/2279 | 68/18866 | 0.7290635 | 0.8325519 | 0.7533225 | 7 | AMACR/AGXT/CAT/PEX26/ACOX2/HMGCL/UBE2D2       |
| Biological Process | GO:0098840 | protein transport along microtubule                              | 7/2279 | 68/18866 | 0.7290635 | 0.8325519 | 0.7533225 | 7 | TNPO1/CLUAP1/KIF5C/IFT140/TTC21B/MAP1A/KIFAP3 |
| Biological Process | GO:0099118 | microtubule-based protein transport                              | 7/2279 | 68/18866 | 0.7290635 | 0.8325519 | 0.7533225 | 7 | TNPO1/CLUAP1/KIF5C/IFT140/TTC21B/MAP1A/KIFAP3 |
| Biological Process | GO:0010659 | cardiac muscle cell apoptotic process                            | 6/2279 | 59/18866 | 0.7325065 | 0.8359812 | 0.7564255 | 6 | MIR145/MIR199A1/MIR24-2/ILK/NFE2L2/MIR199A2   |
| Biological Process | GO:0043030 | regulation of macrophage activation                              | 6/2279 | 59/18866 | 0.7325065 | 0.8359812 | 0.7564255 | 6 | IL10/MIR145/MYO18A/THBS1/PTPRC/GRN            |
| Biological Process | GO:0072413 | signal transduction involved in mitotic cell cycle checkpoint    | 6/2279 | 59/18866 | 0.7325065 | 0.8359812 | 0.7564255 | 6 | TFDP1/E2F7/PCBP4/ZNF385A/ARID3A/CHEK2         |
| Biological Process | GO:1902402 | signal transduction involved in mitotic DNA damage checkpoint    | 6/2279 | 59/18866 | 0.7325065 | 0.8359812 | 0.7564255 | 6 | TFDP1/E2F7/PCBP4/ZNF385A/ARID3A/CHEK2         |
| Biological Process | GO:1902403 | signal transduction involved in mitotic DNA integrity checkpoint | 6/2279 | 59/18866 | 0.7325065 | 0.8359812 | 0.7564255 | 6 | TFDP1/E2F7/PCBP4/ZNF385A/ARID3A/CHEK2         |

|                    |            |                                                         |         |           |           |           |           |    |                                                                                                                             |
|--------------------|------------|---------------------------------------------------------|---------|-----------|-----------|-----------|-----------|----|-----------------------------------------------------------------------------------------------------------------------------|
| Biological Process | GO:2000045 | regulation of G1/S transition of mitotic cell cycle     | 20/2279 | 185/18866 | 0.7352997 | 0.8390683 | 0.7592188 | 20 | RPTOR/TFDP1/PRMT2/FBXO7/E2F7/CTDSPL/PCBP4/RIPK1/PTPN6/NACC2/ZNF385A/ARID3A/GFI1B/PLCB1/MIR138-2/RB1/BCL2/CHEK2/PLRG1/EIF4G1 |
| Biological Process | GO:0030004 | cellular monovalent inorganic cation homeostasis        | 12/2279 | 114/18866 | 0.7367873 | 0.8406648 | 0.7606634 | 12 | TM9SF4/SLC11A1/SLC8A1/KCTD7/ATP6V1B2/GRN/BCL2/ATP6V0B/UBE3A/CLN5/ATP6V0C/ATP6V1C1                                           |
| Biological Process | GO:0007622 | rhythmic behavior                                       | 5/2279  | 50/18866  | 0.7379313 | 0.8410031 | 0.7609695 | 5  | ZFHX3/MTA1/GHRL/USP2/NCOA2                                                                                                  |
| Biological Process | GO:0000380 | alternative mRNA splicing, via spliceosome              | 9/2279  | 87/18866  | 0.7384442 | 0.8410031 | 0.7609695 | 9  | RBM19/SF1/SFSWAP/CELF2/CELF1/RBFOX3/NSRP1/RBM15B/CDK13                                                                      |
| Biological Process | GO:0055072 | iron ion homeostasis                                    | 9/2279  | 87/18866  | 0.7384442 | 0.8410031 | 0.7609695 | 9  | SLC25A37/LCN2/SLC11A1/TTC7A/SLC11A2/EPAS1/LTF/EPB42/NCOA4                                                                   |
| Biological Process | GO:0006448 | regulation of translational elongation                  | 2/2279  | 21/18866  | 0.7399835 | 0.8410031 | 0.7609695 | 2  | CPEB3/SHFL                                                                                                                  |
| Biological Process | GO:0006490 | oligosaccharide-lipid intermediate biosynthetic process | 2/2279  | 21/18866  | 0.7399835 | 0.8410031 | 0.7609695 | 2  | ALG11/DPAGT1                                                                                                                |
| Biological Process | GO:0006662 | glycerol ether metabolic process                        | 2/2279  | 21/18866  | 0.7399835 | 0.8410031 | 0.7609695 | 2  | CHPT1/PEDS1                                                                                                                 |
| Biological Process | GO:0006837 | serotonin transport                                     | 2/2279  | 21/18866  | 0.7399835 | 0.8410031 | 0.7609695 | 2  | ITGB3/P2RX1                                                                                                                 |

|                    |            |                                                        |        |          |           |           |           |   |               |
|--------------------|------------|--------------------------------------------------------|--------|----------|-----------|-----------|-----------|---|---------------|
| Biological Process | GO:0007130 | synaptonemal complex assembly                          | 2/2279 | 21/18866 | 0.7399835 | 0.8410031 | 0.7609695 | 2 | RAD21L1/TEX12 |
| Biological Process | GO:0009067 | aspartate family amino acid biosynthetic process       | 2/2279 | 21/18866 | 0.7399835 | 0.8410031 | 0.7609695 | 2 | MTHFD1/ADI1   |
| Biological Process | GO:0016540 | protein autoprocessing                                 | 2/2279 | 21/18866 | 0.7399835 | 0.8410031 | 0.7609695 | 2 | F12/CASP1     |
| Biological Process | GO:0019370 | leukotriene biosynthetic process                       | 2/2279 | 21/18866 | 0.7399835 | 0.8410031 | 0.7609695 | 2 | GGT1/MGST2    |
| Biological Process | GO:0030728 | ovulation                                              | 2/2279 | 21/18866 | 0.7399835 | 0.8410031 | 0.7609695 | 2 | TNFAIP6/INHBA |
| Biological Process | GO:0030878 | thyroid gland development                              | 2/2279 | 21/18866 | 0.7399835 | 0.8410031 | 0.7609695 | 2 | SMAD3/TG      |
| Biological Process | GO:0036499 | PERK-mediated unfolded protein response                | 2/2279 | 21/18866 | 0.7399835 | 0.8410031 | 0.7609695 | 2 | NCK2/NFE2L2   |
| Biological Process | GO:0042402 | cellular biogenic amine catabolic process              | 2/2279 | 21/18866 | 0.7399835 | 0.8410031 | 0.7609695 | 2 | SAT2/HNMT     |
| Biological Process | GO:0045717 | negative regulation of fatty acid biosynthetic process | 2/2279 | 21/18866 | 0.7399835 | 0.8410031 | 0.7609695 | 2 | WDTC1/ACADVL  |

|                    |            |                                                            |        |          |           |           |           |   |               |
|--------------------|------------|------------------------------------------------------------|--------|----------|-----------|-----------|-----------|---|---------------|
| Biological Process | GO:0046386 | deoxyribose phosphate catabolic process                    | 2/2279 | 21/18866 | 0.7399835 | 0.8410031 | 0.7609695 | 2 | UNG/NTHL1     |
| Biological Process | GO:0046514 | ceramide catabolic process                                 | 2/2279 | 21/18866 | 0.7399835 | 0.8410031 | 0.7609695 | 2 | HEXB/GALC     |
| Biological Process | GO:0060008 | Sertoli cell differentiation                               | 2/2279 | 21/18866 | 0.7399835 | 0.8410031 | 0.7609695 | 2 | RARA/NTRK1    |
| Biological Process | GO:0060117 | auditory receptor cell development                         | 2/2279 | 21/18866 | 0.7399835 | 0.8410031 | 0.7609695 | 2 | FGFR1/TMC1    |
| Biological Process | GO:0061042 | vascular wound healing                                     | 2/2279 | 21/18866 | 0.7399835 | 0.8410031 | 0.7609695 | 2 | TNF/TNFAIP3   |
| Biological Process | GO:0061213 | positive regulation of mesonephros development             | 2/2279 | 21/18866 | 0.7399835 | 0.8410031 | 0.7609695 | 2 | PAX2/HOXB7    |
| Biological Process | GO:0070734 | histone H3-K27 methylation                                 | 2/2279 | 21/18866 | 0.7399835 | 0.8410031 | 0.7609695 | 2 | EHMT2/PHF19   |
| Biological Process | GO:0140467 | integrated stress response signaling                       | 2/2279 | 21/18866 | 0.7399835 | 0.8410031 | 0.7609695 | 2 | NCK2/NFE2L2   |
| Biological Process | GO:1900543 | negative regulation of purine nucleotide metabolic process | 2/2279 | 21/18866 | 0.7399835 | 0.8410031 | 0.7609695 | 2 | HDAC4/CBFA2T3 |



|                    |            |                                                                                  |         |           |           |           |           |    |  |                                                                                                                    |
|--------------------|------------|----------------------------------------------------------------------------------|---------|-----------|-----------|-----------|-----------|----|--|--------------------------------------------------------------------------------------------------------------------|
| Biological Process | GO:1903978 | regulation of microglial cell activation                                         | 2/2279  | 21/18866  | 0.7399835 | 0.8410031 | 0.7609695 | 2  |  | PTPRC/GRN                                                                                                          |
| Biological Process | GO:1904886 | beta-catenin destruction complex disassembly                                     | 2/2279  | 21/18866  | 0.7399835 | 0.8410031 | 0.7609695 | 2  |  | AXIN1/FRAT2                                                                                                        |
| Biological Process | GO:2000269 | regulation of fibroblast apoptotic process                                       | 2/2279  | 21/18866  | 0.7399835 | 0.8410031 | 0.7609695 | 2  |  | MIR24-2/CHD8                                                                                                       |
| Biological Process | GO:2001014 | regulation of skeletal muscle cell differentiation                               | 2/2279  | 21/18866  | 0.7399835 | 0.8410031 | 0.7609695 | 2  |  | ARNTL/MEF2C                                                                                                        |
| Biological Process | GO:0055067 | monovalent inorganic cation homeostasis                                          | 17/2279 | 159/18866 | 0.7402413 | 0.8410031 | 0.7609695 | 17 |  | TM9SF4/SLC11A1/SLC8A1/KCTD7/COMT/GNAI2/ATP6V1B2/GRN/BCL2/ATP6V0B/UBE3A/AGTR1/CLN5/SLC12A1/SLC12A7/ATP6V0C/ATP6V1C1 |
| Biological Process | GO:0000288 | nuclear-transcribed mRNA catabolic process, deadenylation-dependent decay        | 8/2279  | 78/18866  | 0.7402657 | 0.8410031 | 0.7609695 | 8  |  | LSM1/EXOSC2/TNRC6B/SAMD4A/AGO2/EDC3/LSM7/CPEB3                                                                     |
| Biological Process | GO:0002323 | natural killer cell activation involved in immune response                       | 3/2279  | 31/18866  | 0.7408015 | 0.8410031 | 0.7609695 | 3  |  | RAB27A/HLA-F/PGLYRP1                                                                                               |
| Biological Process | GO:0034472 | snRNA 3'-end processing                                                          | 3/2279  | 31/18866  | 0.7408015 | 0.8410031 | 0.7609695 | 3  |  | EXOSC2/TOE1/TUT1                                                                                                   |
| Biological Process | GO:0045737 | positive regulation of cyclin-dependent protein serine/threonine kinase activity | 3/2279  | 31/18866  | 0.7408015 | 0.8410031 | 0.7609695 | 3  |  | PDGFB/CCNY/CCNYL1                                                                                                  |

|                    |            |                                                                      |         |           |           |           |           |    |                                                                                                                     |
|--------------------|------------|----------------------------------------------------------------------|---------|-----------|-----------|-----------|-----------|----|---------------------------------------------------------------------------------------------------------------------|
| Biological Process | GO:0045987 | positive regulation of smooth muscle contraction                     | 3/2279  | 31/18866  | 0.7408015 | 0.8410031 | 0.7609695 | 3  | CTTN/GHRL/F2R                                                                                                       |
| Biological Process | GO:0050686 | negative regulation of mRNA processing                               | 3/2279  | 31/18866  | 0.7408015 | 0.8410031 | 0.7609695 | 3  | PCBP4/SFSWAP/RNF40                                                                                                  |
| Biological Process | GO:0050974 | detection of mechanical stimulus involved in sensory perception      | 3/2279  | 31/18866  | 0.7408015 | 0.8410031 | 0.7609695 | 3  | SCN1A/NTRK1/TMC1                                                                                                    |
| Biological Process | GO:0086011 | membrane repolarization during action potential                      | 3/2279  | 31/18866  | 0.7408015 | 0.8410031 | 0.7609695 | 3  | KCNE1/NOS1AP/KCNQ1                                                                                                  |
| Biological Process | GO:0099068 | postsynapse assembly                                                 | 3/2279  | 31/18866  | 0.7408015 | 0.8410031 | 0.7609695 | 3  | NRXN1/NRXN2/SHANK2                                                                                                  |
| Biological Process | GO:1900745 | positive regulation of p38MAPK cascade                               | 3/2279  | 31/18866  | 0.7408015 | 0.8410031 | 0.7609695 | 3  | MAP3K3/GADD45G/GDF6                                                                                                 |
| Biological Process | GO:1903792 | negative regulation of anion transport                               | 3/2279  | 31/18866  | 0.7408015 | 0.8410031 | 0.7609695 | 3  | THBS1/SLC43A2/SLC43A1                                                                                               |
| Biological Process | GO:1904046 | negative regulation of vascular endothelial growth factor production | 3/2279  | 31/18866  | 0.7408015 | 0.8410031 | 0.7609695 | 3  | MIR140/MIR199A1/MIR199A2                                                                                            |
| Biological Process | GO:0140013 | meiotic nuclear division                                             | 19/2279 | 177/18866 | 0.7426315 | 0.8429799 | 0.7627581 | 19 | CALR/FZR1/MOV10L1/BRCA2/EME1/MEIOB/FANCA/RNF212/PPP2R1A/PLCB1/CCNA1/RAD21L1/DMC1/SLX4/TEX12/LIF/KLHDC3/PSMD13/TERB2 |

|                    |            |                                                         |         |           |           |           |           |    |                                                                                                                                                                                                                                                                              |
|--------------------|------------|---------------------------------------------------------|---------|-----------|-----------|-----------|-----------|----|------------------------------------------------------------------------------------------------------------------------------------------------------------------------------------------------------------------------------------------------------------------------------|
| Biological Process | GO:0014742 | positive regulation of muscle hypertrophy               | 4/2279  | 41/18866  | 0.7464846 | 0.846949  | 0.7663495 | 4  | PRKCA/MIR199A1/PDE9A/MIR199A2                                                                                                                                                                                                                                                |
| Biological Process | GO:0043267 | negative regulation of potassium ion transport          | 4/2279  | 41/18866  | 0.7464846 | 0.846949  | 0.7663495 | 4  | KCNE1/CASQ2/BIN1/CAB39                                                                                                                                                                                                                                                       |
| Biological Process | GO:0048286 | lung alveolus development                               | 4/2279  | 41/18866  | 0.7464846 | 0.846949  | 0.7663495 | 4  | CREB1/TNS3/SFTPD/LIF                                                                                                                                                                                                                                                         |
| Biological Process | GO:1901998 | toxin transport                                         | 4/2279  | 41/18866  | 0.7464846 | 0.846949  | 0.7663495 | 4  | ABCG1/RAB43/DNM1/SLC7A8                                                                                                                                                                                                                                                      |
| Biological Process | GO:0006631 | fatty acid metabolic process                            | 44/2279 | 396/18866 | 0.7471195 | 0.8473837 | 0.7667428 | 44 | PRKAG2/PLA2G15/MGLL/PPARG/ACSL1/MFSD2A/LIPC/GGT1/ABHD16A/AMACR/AOAH/ACOXL/TNFRSF1A/PRKAB1/ACOT7/ACSS1/CYP4F3/ACADM/POR/MYO5A/NR1H2/ACACB/ACSS2/ACOX2/PER2/ACACA/EPHX1/ACSF3/FA2H/ABHD5/PCK2/ACAT1/SCD/SREBF1/ADTRP/WBTC1/CPT1A/LPIN1/LYPLA2/ZADH2/ACADVL/PRKAA1/PRXL2B/PEDS1 |
| Biological Process | GO:0019229 | regulation of vasoconstriction                          | 6/2279  | 60/18866  | 0.7474029 | 0.8473837 | 0.7667428 | 6  | GJA5/HRH1/PER2/P2RX1/F2R/AGTR1                                                                                                                                                                                                                                               |
| Biological Process | GO:0061077 | chaperone-mediated protein folding                      | 6/2279  | 60/18866  | 0.7474029 | 0.8473837 | 0.7667428 | 6  | FKBP5/DNAJB13/CLU/UNC45A/TOR1B/P3H1                                                                                                                                                                                                                                          |
| Biological Process | GO:0061098 | positive regulation of protein tyrosine kinase activity | 6/2279  | 60/18866  | 0.7474029 | 0.8473837 | 0.7667428 | 6  | TGFA/CCL5/CSF1R/GHRL/PDGFB/CASS4                                                                                                                                                                                                                                             |
| Biological Process | GO:1902883 | negative regulation of response to oxidative stress     | 6/2279  | 60/18866  | 0.7474029 | 0.8473837 | 0.7667428 | 6  | IL10/FBXO7/NOL3/NFE2L2/BAG5/PRKN                                                                                                                                                                                                                                             |

|                    |            |                                                        |         |           |           |           |           |    |                                                                                                                 |
|--------------------|------------|--------------------------------------------------------|---------|-----------|-----------|-----------|-----------|----|-----------------------------------------------------------------------------------------------------------------|
| Biological Process | GO:2000242 | negative regulation of reproductive process            | 6/2279  | 60/18866  | 0.7474029 | 0.8473837 | 0.7667428 | 6  | CALR/ARHGDI1B/OVOL1/NPPC/NODAL/LIF                                                                              |
| Biological Process | GO:0071156 | regulation of cell cycle arrest                        | 11/2279 | 106/18866 | 0.7481343 | 0.8481116 | 0.7674015 | 11 | CALR/TFDP1/E2F7/BIN1/PCBP4/ZNF385A/ZBTB17/ARID3A/MED25/FOXM1/CHEK2                                              |
| Biological Process | GO:0061138 | morphogenesis of a branching epithelium                | 20/2279 | 187/18866 | 0.7524113 | 0.848352  | 0.767619  | 20 | CTS2/TACSTD2/RXRA/IL10/LRP5L/VDR/SPINT2/TNF/TGFBR2/CTSH/ILK/PAX2/FGFR1/RDH10/GRHL2/ENG/BCL2/NOTCH1/NOTCH4/HOXB7 |
| Biological Process | GO:0065002 | intracellular protein transmembrane transport          | 5/2279  | 51/18866  | 0.7538172 | 0.848352  | 0.767619  | 5  | PAM16/BCR/PEX26/TIMM44/RTN2                                                                                     |
| Biological Process | GO:0002534 | cytokine production involved in inflammatory response  | 7/2279  | 70/18866  | 0.7566386 | 0.848352  | 0.767619  | 7  | MIR140/MEFV/TNF/NOD2/PER1/PLD3/CD96                                                                             |
| Biological Process | GO:0050795 | regulation of behavior                                 | 7/2279  | 70/18866  | 0.7566386 | 0.848352  | 0.767619  | 7  | HDAC4/ZFX3/NRXN1/GHRL/TTC21B/MEF2C/MBD5                                                                         |
| Biological Process | GO:0070192 | chromosome organization involved in meiotic cell cycle | 7/2279  | 70/18866  | 0.7566386 | 0.848352  | 0.767619  | 7  | MEIOB/RNF212/PPP2R1A/RAD21L1/DMC1/TEX12/TERB2                                                                   |
| Biological Process | GO:0001820 | serotonin secretion                                    | 1/2279  | 11/18866  | 0.757454  | 0.848352  | 0.767619  | 1  | P2RX1                                                                                                           |
| Biological Process | GO:0002182 | cytoplasmic translational elongation                   | 1/2279  | 11/18866  | 0.757454  | 0.848352  | 0.767619  | 1  | CPEB3                                                                                                           |

|                    |            |                                         |        |          |          |          |          |   |        |
|--------------------|------------|-----------------------------------------|--------|----------|----------|----------|----------|---|--------|
| Biological Process | GO:0002328 | pro-B cell differentiation              | 1/2279 | 11/18866 | 0.757454 | 0.848352 | 0.767619 | 1 | NOTCH1 |
| Biological Process | GO:0003263 | cardioblast proliferation               | 1/2279 | 11/18866 | 0.757454 | 0.848352 | 0.767619 | 1 | NOTCH1 |
| Biological Process | GO:0003264 | regulation of cardioblast proliferation | 1/2279 | 11/18866 | 0.757454 | 0.848352 | 0.767619 | 1 | NOTCH1 |
| Biological Process | GO:0006020 | inositol metabolic process              | 1/2279 | 11/18866 | 0.757454 | 0.848352 | 0.767619 | 1 | IMPA2  |
| Biological Process | GO:0006182 | cGMP biosynthetic process               | 1/2279 | 11/18866 | 0.757454 | 0.848352 | 0.767619 | 1 | NPPC   |
| Biological Process | GO:0006183 | GTP biosynthetic process                | 1/2279 | 11/18866 | 0.757454 | 0.848352 | 0.767619 | 1 | IMPDH1 |
| Biological Process | GO:0006449 | regulation of translational termination | 1/2279 | 11/18866 | 0.757454 | 0.848352 | 0.767619 | 1 | SHFL   |
| Biological Process | GO:0006527 | arginine catabolic process              | 1/2279 | 11/18866 | 0.757454 | 0.848352 | 0.767619 | 1 | FAH    |
| Biological Process | GO:0006707 | cholesterol catabolic process           | 1/2279 | 11/18866 | 0.757454 | 0.848352 | 0.767619 | 1 | AKR1D1 |

|                    |            |                                                                  |        |          |          |          |          |   |        |
|--------------------|------------|------------------------------------------------------------------|--------|----------|----------|----------|----------|---|--------|
| Biological Process | GO:0006751 | glutathione catabolic process                                    | 1/2279 | 11/18866 | 0.757454 | 0.848352 | 0.767619 | 1 | GGT1   |
| Biological Process | GO:0007191 | adenylate cyclase-activating dopamine receptor signaling pathway | 1/2279 | 11/18866 | 0.757454 | 0.848352 | 0.767619 | 1 | GNG2   |
| Biological Process | GO:0009629 | response to gravity                                              | 1/2279 | 11/18866 | 0.757454 | 0.848352 | 0.767619 | 1 | PKM    |
| Biological Process | GO:0014820 | tonic smooth muscle contraction                                  | 1/2279 | 11/18866 | 0.757454 | 0.848352 | 0.767619 | 1 | MYLK   |
| Biological Process | GO:0014889 | muscle atrophy                                                   | 1/2279 | 11/18866 | 0.757454 | 0.848352 | 0.767619 | 1 | GSN    |
| Biological Process | GO:0016078 | tRNA catabolic process                                           | 1/2279 | 11/18866 | 0.757454 | 0.848352 | 0.767619 | 1 | EXOSC2 |
| Biological Process | GO:0016081 | synaptic vesicle docking                                         | 1/2279 | 11/18866 | 0.757454 | 0.848352 | 0.767619 | 1 | CTBP2  |
| Biological Process | GO:0016127 | sterol catabolic process                                         | 1/2279 | 11/18866 | 0.757454 | 0.848352 | 0.767619 | 1 | AKR1D1 |
| Biological Process | GO:0019042 | viral latency                                                    | 1/2279 | 11/18866 | 0.757454 | 0.848352 | 0.767619 | 1 | BANF1  |

|                    |            |                                                   |        |          |          |          |          |   |       |
|--------------------|------------|---------------------------------------------------|--------|----------|----------|----------|----------|---|-------|
| Biological Process | GO:0021521 | ventral spinal cord interneuron specification     | 1/2279 | 11/18866 | 0.757454 | 0.848352 | 0.767619 | 1 | SUFU  |
| Biological Process | GO:0021561 | facial nerve development                          | 1/2279 | 11/18866 | 0.757454 | 0.848352 | 0.767619 | 1 | NRP2  |
| Biological Process | GO:0021610 | facial nerve morphogenesis                        | 1/2279 | 11/18866 | 0.757454 | 0.848352 | 0.767619 | 1 | NRP2  |
| Biological Process | GO:0031284 | positive regulation of guanylate cyclase activity | 1/2279 | 11/18866 | 0.757454 | 0.848352 | 0.767619 | 1 | RCVRN |
| Biological Process | GO:0031442 | positive regulation of mRNA 3'-end processing     | 1/2279 | 11/18866 | 0.757454 | 0.848352 | 0.767619 | 1 | CPEB3 |
| Biological Process | GO:0031652 | positive regulation of heat generation            | 1/2279 | 11/18866 | 0.757454 | 0.848352 | 0.767619 | 1 | TNF   |
| Biological Process | GO:0031915 | positive regulation of synaptic plasticity        | 1/2279 | 11/18866 | 0.757454 | 0.848352 | 0.767619 | 1 | SSH1  |
| Biological Process | GO:0032253 | dense core granule localization                   | 1/2279 | 11/18866 | 0.757454 | 0.848352 | 0.767619 | 1 | KIF1B |
| Biological Process | GO:0032276 | regulation of gonadotropin secretion              | 1/2279 | 11/18866 | 0.757454 | 0.848352 | 0.767619 | 1 | INHBA |

|                    |            |                                                                          |        |          |          |          |          |   |          |
|--------------------|------------|--------------------------------------------------------------------------|--------|----------|----------|----------|----------|---|----------|
| Biological Process | GO:0032306 | regulation of prostaglandin secretion                                    | 1/2279 | 11/18866 | 0.757454 | 0.848352 | 0.767619 | 1 | MAP2K6   |
| Biological Process | GO:0032908 | regulation of transforming growth factor beta1 production                | 1/2279 | 11/18866 | 0.757454 | 0.848352 | 0.767619 | 1 | THBS1    |
| Biological Process | GO:0033079 | immature T cell proliferation                                            | 1/2279 | 11/18866 | 0.757454 | 0.848352 | 0.767619 | 1 | TMEM131L |
| Biological Process | GO:0033148 | positive regulation of intracellular estrogen receptor signaling pathway | 1/2279 | 11/18866 | 0.757454 | 0.848352 | 0.767619 | 1 | KMT2D    |
| Biological Process | GO:0033327 | Leydig cell differentiation                                              | 1/2279 | 11/18866 | 0.757454 | 0.848352 | 0.767619 | 1 | SF1      |
| Biological Process | GO:0033632 | regulation of cell-cell adhesion mediated by integrin                    | 1/2279 | 11/18866 | 0.757454 | 0.848352 | 0.767619 | 1 | CCL5     |
| Biological Process | GO:0034372 | very-low-density lipoprotein particle remodeling                         | 1/2279 | 11/18866 | 0.757454 | 0.848352 | 0.767619 | 1 | LIPC     |
| Biological Process | GO:0034650 | cortisol metabolic process                                               | 1/2279 | 11/18866 | 0.757454 | 0.848352 | 0.767619 | 1 | DGKQ     |
| Biological Process | GO:0034776 | response to histamine                                                    | 1/2279 | 11/18866 | 0.757454 | 0.848352 | 0.767619 | 1 | HRH1     |



|                    |            |                                                                                                 |        |          |          |          |          |   |         |
|--------------------|------------|-------------------------------------------------------------------------------------------------|--------|----------|----------|----------|----------|---|---------|
| Biological Process | GO:0034969 | histone arginine methylation                                                                    | 1/2279 | 11/18866 | 0.757454 | 0.848352 | 0.767619 | 1 | PRMT2   |
| Biological Process | GO:0035246 | peptidyl-arginine N-methylation                                                                 | 1/2279 | 11/18866 | 0.757454 | 0.848352 | 0.767619 | 1 | PRMT2   |
| Biological Process | GO:0035542 | regulation of SNARE complex assembly                                                            | 1/2279 | 11/18866 | 0.757454 | 0.848352 | 0.767619 | 1 | VPS18   |
| Biological Process | GO:0035768 | endothelial cell chemotaxis to fibroblast growth factor                                         | 1/2279 | 11/18866 | 0.757454 | 0.848352 | 0.767619 | 1 | FGFR1   |
| Biological Process | GO:0035865 | cellular response to potassium ion                                                              | 1/2279 | 11/18866 | 0.757454 | 0.848352 | 0.767619 | 1 | CRHBP   |
| Biological Process | GO:0039532 | negative regulation of viral-induced cytoplasmic pattern recognition receptor signaling pathway | 1/2279 | 11/18866 | 0.757454 | 0.848352 | 0.767619 | 1 | SEC14L1 |
| Biological Process | GO:0040015 | negative regulation of multicellular organism growth                                            | 1/2279 | 11/18866 | 0.757454 | 0.848352 | 0.767619 | 1 | RAI1    |
| Biological Process | GO:0042789 | mRNA transcription by RNA polymerase II                                                         | 1/2279 | 11/18866 | 0.757454 | 0.848352 | 0.767619 | 1 | SREBF1  |
| Biological Process | GO:0044803 | multi-organism membrane organization                                                            | 1/2279 | 11/18866 | 0.757454 | 0.848352 | 0.767619 | 1 | PI4KA   |

|                    |            |                                                                                       |        |          |          |          |          |   |        |
|--------------------|------------|---------------------------------------------------------------------------------------|--------|----------|----------|----------|----------|---|--------|
| Biological Process | GO:0044848 | biological phase                                                                      | 1/2279 | 11/18866 | 0.757454 | 0.848352 | 0.767619 | 1 | CDH3   |
| Biological Process | GO:0045835 | negative regulation of meiotic nuclear division                                       | 1/2279 | 11/18866 | 0.757454 | 0.848352 | 0.767619 | 1 | LIF    |
| Biological Process | GO:0045899 | positive regulation of RNA polymerase II transcription preinitiation complex assembly | 1/2279 | 11/18866 | 0.757454 | 0.848352 | 0.767619 | 1 | CREB1  |
| Biological Process | GO:0046607 | positive regulation of centrosome cycle                                               | 1/2279 | 11/18866 | 0.757454 | 0.848352 | 0.767619 | 1 | POC1A  |
| Biological Process | GO:0048642 | negative regulation of skeletal muscle tissue development                             | 1/2279 | 11/18866 | 0.757454 | 0.848352 | 0.767619 | 1 | TGFB1  |
| Biological Process | GO:0048672 | positive regulation of collateral sprouting                                           | 1/2279 | 11/18866 | 0.757454 | 0.848352 | 0.767619 | 1 | SEMA4D |
| Biological Process | GO:0051132 | NK T cell activation                                                                  | 1/2279 | 11/18866 | 0.757454 | 0.848352 | 0.767619 | 1 | ZBTB7B |
| Biological Process | GO:0051561 | positive regulation of mitochondrial calcium ion concentration                        | 1/2279 | 11/18866 | 0.757454 | 0.848352 | 0.767619 | 1 | FIS1   |
| Biological Process | GO:0051574 | positive regulation of histone H3-K9 methylation                                      | 1/2279 | 11/18866 | 0.757454 | 0.848352 | 0.767619 | 1 | MYB    |

|                    |            |                                                                              |        |          |          |          |          |   |        |
|--------------------|------------|------------------------------------------------------------------------------|--------|----------|----------|----------|----------|---|--------|
| Biological Process | GO:0051610 | serotonin uptake                                                             | 1/2279 | 11/18866 | 0.757454 | 0.848352 | 0.767619 | 1 | ITGB3  |
| Biological Process | GO:0051974 | negative regulation of telomerase activity                                   | 1/2279 | 11/18866 | 0.757454 | 0.848352 | 0.767619 | 1 | PPARG  |
| Biological Process | GO:0060174 | limb bud formation                                                           | 1/2279 | 11/18866 | 0.757454 | 0.848352 | 0.767619 | 1 | ZNF219 |
| Biological Process | GO:0060287 | epithelial cilium movement involved in determination of left/right asymmetry | 1/2279 | 11/18866 | 0.757454 | 0.848352 | 0.767619 | 1 | RFX3   |
| Biological Process | GO:0060433 | bronchus development                                                         | 1/2279 | 11/18866 | 0.757454 | 0.848352 | 0.767619 | 1 | TGFBR2 |
| Biological Process | GO:0060439 | trachea morphogenesis                                                        | 1/2279 | 11/18866 | 0.757454 | 0.848352 | 0.767619 | 1 | TGFBR2 |
| Biological Process | GO:0060573 | cell fate specification involved in pattern specification                    | 1/2279 | 11/18866 | 0.757454 | 0.848352 | 0.767619 | 1 | SUFU   |
| Biological Process | GO:0060767 | epithelial cell proliferation involved in prostate gland development         | 1/2279 | 11/18866 | 0.757454 | 0.848352 | 0.767619 | 1 | NOTCH1 |
| Biological Process | GO:0061085 | regulation of histone H3-K27 methylation                                     | 1/2279 | 11/18866 | 0.757454 | 0.848352 | 0.767619 | 1 | PHF19  |

|                    |            |                                                                 |        |          |          |          |          |   |         |
|--------------------|------------|-----------------------------------------------------------------|--------|----------|----------|----------|----------|---|---------|
| Biological Process | GO:0061635 | regulation of protein complex stability                         | 1/2279 | 11/18866 | 0.757454 | 0.848352 | 0.767619 | 1 | ATG14   |
| Biological Process | GO:0070203 | regulation of establishment of protein localization to telomere | 1/2279 | 11/18866 | 0.757454 | 0.848352 | 0.767619 | 1 | CCT6A   |
| Biological Process | GO:0070254 | mucus secretion                                                 | 1/2279 | 11/18866 | 0.757454 | 0.848352 | 0.767619 | 1 | PRKCE   |
| Biological Process | GO:0070417 | cellular response to cold                                       | 1/2279 | 11/18866 | 0.757454 | 0.848352 | 0.767619 | 1 | FOXO1   |
| Biological Process | GO:0070757 | interleukin-35-mediated signaling pathway                       | 1/2279 | 11/18866 | 0.757454 | 0.848352 | 0.767619 | 1 | JAK1    |
| Biological Process | GO:0072173 | metanephric tubule morphogenesis                                | 1/2279 | 11/18866 | 0.757454 | 0.848352 | 0.767619 | 1 | PAX2    |
| Biological Process | GO:0072205 | metanephric collecting duct development                         | 1/2279 | 11/18866 | 0.757454 | 0.848352 | 0.767619 | 1 | PAX2    |
| Biological Process | GO:0072321 | chaperone-mediated protein transport                            | 1/2279 | 11/18866 | 0.757454 | 0.848352 | 0.767619 | 1 | CLU     |
| Biological Process | GO:0090481 | pyrimidine nucleotide-sugar transmembrane transport             | 1/2279 | 11/18866 | 0.757454 | 0.848352 | 0.767619 | 1 | SLC35C2 |

|                    |            |                                                    |        |          |          |          |          |   |          |
|--------------------|------------|----------------------------------------------------|--------|----------|----------|----------|----------|---|----------|
| Biological Process | GO:0097396 | response to interleukin-17                         | 1/2279 | 11/18866 | 0.757454 | 0.848352 | 0.767619 | 1 | TRAF3IP2 |
| Biological Process | GO:0097398 | cellular response to interleukin-17                | 1/2279 | 11/18866 | 0.757454 | 0.848352 | 0.767619 | 1 | TRAF3IP2 |
| Biological Process | GO:0097400 | interleukin-17-mediated signaling pathway          | 1/2279 | 11/18866 | 0.757454 | 0.848352 | 0.767619 | 1 | TRAF3IP2 |
| Biological Process | GO:0098917 | retrograde trans-synaptic signaling                | 1/2279 | 11/18866 | 0.757454 | 0.848352 | 0.767619 | 1 | PLCB1    |
| Biological Process | GO:0099519 | dense core granule cytoskeletal transport          | 1/2279 | 11/18866 | 0.757454 | 0.848352 | 0.767619 | 1 | KIF1B    |
| Biological Process | GO:0099624 | atrial cardiac muscle cell membrane repolarization | 1/2279 | 11/18866 | 0.757454 | 0.848352 | 0.767619 | 1 | KCNQ1    |
| Biological Process | GO:0106049 | regulation of cellular response to osmotic stress  | 1/2279 | 11/18866 | 0.757454 | 0.848352 | 0.767619 | 1 | ARHGEF2  |
| Biological Process | GO:1900247 | regulation of cytoplasmic translational elongation | 1/2279 | 11/18866 | 0.757454 | 0.848352 | 0.767619 | 1 | CPEB3    |
| Biological Process | GO:1901077 | regulation of relaxation of muscle                 | 1/2279 | 11/18866 | 0.757454 | 0.848352 | 0.767619 | 1 | PDE4D    |

|                    |            |                                                                                                                  |        |          |          |          |          |   |       |
|--------------------|------------|------------------------------------------------------------------------------------------------------------------|--------|----------|----------|----------|----------|---|-------|
| Biological Process | GO:1901950 | dense core granule transport                                                                                     | 1/2279 | 11/18866 | 0.757454 | 0.848352 | 0.767619 | 1 | KIF1B |
| Biological Process | GO:1902033 | regulation of hematopoietic stem cell proliferation                                                              | 1/2279 | 11/18866 | 0.757454 | 0.848352 | 0.767619 | 1 | KAT7  |
| Biological Process | GO:1902513 | regulation of organelle transport along microtubule                                                              | 1/2279 | 11/18866 | 0.757454 | 0.848352 | 0.767619 | 1 | CNIH2 |
| Biological Process | GO:1903299 | regulation of hexokinase activity                                                                                | 1/2279 | 11/18866 | 0.757454 | 0.848352 | 0.767619 | 1 | PRKN  |
| Biological Process | GO:1904350 | regulation of protein catabolic process in the vacuole                                                           | 1/2279 | 11/18866 | 0.757454 | 0.848352 | 0.767619 | 1 | MGAT3 |
| Biological Process | GO:1904869 | regulation of protein localization to Cajal body                                                                 | 1/2279 | 11/18866 | 0.757454 | 0.848352 | 0.767619 | 1 | CCT6A |
| Biological Process | GO:1904871 | positive regulation of protein localization to Cajal body                                                        | 1/2279 | 11/18866 | 0.757454 | 0.848352 | 0.767619 | 1 | CCT6A |
| Biological Process | GO:1905902 | regulation of mesoderm formation                                                                                 | 1/2279 | 11/18866 | 0.757454 | 0.848352 | 0.767619 | 1 | FGFR1 |
| Biological Process | GO:1990440 | positive regulation of transcription from RNA polymerase II promoter in response to endoplasmic reticulum stress | 1/2279 | 11/18866 | 0.757454 | 0.848352 | 0.767619 | 1 | CEBPB |

|                    |            |                                                                       |         |           |           |           |           |    |                                                                                                    |
|--------------------|------------|-----------------------------------------------------------------------|---------|-----------|-----------|-----------|-----------|----|----------------------------------------------------------------------------------------------------|
| Biological Process | GO:2000318 | positive regulation of T-helper 17 type immune response               | 1/2279  | 11/18866  | 0.757454  | 0.848352  | 0.767619  | 1  | NLRP3                                                                                              |
| Biological Process | GO:2000544 | regulation of endothelial cell chemotaxis to fibroblast growth factor | 1/2279  | 11/18866  | 0.757454  | 0.848352  | 0.767619  | 1  | FGFR1                                                                                              |
| Biological Process | GO:2000628 | regulation of miRNA metabolic process                                 | 1/2279  | 11/18866  | 0.757454  | 0.848352  | 0.767619  | 1  | RELA                                                                                               |
| Biological Process | GO:2001138 | regulation of phospholipid transport                                  | 1/2279  | 11/18866  | 0.757454  | 0.848352  | 0.767619  | 1  | ATP8A1                                                                                             |
| Biological Process | GO:2001140 | positive regulation of phospholipid transport                         | 1/2279  | 11/18866  | 0.757454  | 0.848352  | 0.767619  | 1  | ATP8A1                                                                                             |
| Biological Process | GO:0050684 | regulation of mRNA processing                                         | 16/2279 | 152/18866 | 0.7579217 | 0.8487758 | 0.7680025 | 16 | RBM19/SRPK2/PCBP4/PABPN1/SF1/CPEB3/DAZAP1/SFSWAP/CELF2/CELF1/RBFOX3/NSRP1/ZC3H3/RBM15B/CPSF4/RNF40 |
| Biological Process | GO:0003016 | respiratory system process                                            | 3/2279  | 32/18866  | 0.7604087 | 0.8509591 | 0.769978  | 3  | MTG2/FTO/YWHAZ                                                                                     |
| Biological Process | GO:0051503 | adenine nucleotide transport                                          | 3/2279  | 32/18866  | 0.7604087 | 0.8509591 | 0.769978  | 3  | SLC25A25/SLC33A1/SLC25A1                                                                           |
| Biological Process | GO:0060603 | mammary gland duct morphogenesis                                      | 3/2279  | 32/18866  | 0.7604087 | 0.8509591 | 0.769978  | 3  | LRP5L/VDR/CSF1R                                                                                    |

|                    |            |                                                                         |         |           |           |           |           |    |                                                                                                                                             |
|--------------------|------------|-------------------------------------------------------------------------|---------|-----------|-----------|-----------|-----------|----|---------------------------------------------------------------------------------------------------------------------------------------------|
| Biological Process | GO:0061157 | mRNA destabilization                                                    | 3/2279  | 32/18866  | 0.7604087 | 0.8509591 | 0.769978  | 3  | ZC3H12D/CPEB3/FTO                                                                                                                           |
| Biological Process | GO:0071353 | cellular response to interleukin-4                                      | 3/2279  | 32/18866  | 0.7604087 | 0.8509591 | 0.769978  | 3  | RUFY4/ADAMTS13/MCM2                                                                                                                         |
| Biological Process | GO:0097421 | liver regeneration                                                      | 3/2279  | 32/18866  | 0.7604087 | 0.8509591 | 0.769978  | 3  | IL10/CPB2/CEBPB                                                                                                                             |
| Biological Process | GO:0010658 | striated muscle cell apoptotic process                                  | 6/2279  | 61/18866  | 0.7616895 | 0.8521447 | 0.7710507 | 6  | MIR145/MIR199A1/MIR24-2/ILK/NFE2L2/MIR199A2                                                                                                 |
| Biological Process | GO:1904356 | regulation of telomere maintenance via telomere lengthening             | 6/2279  | 61/18866  | 0.7616895 | 0.8521447 | 0.7710507 | 6  | TNKS/HMBOX1/RTEL1/SMG6/SLX4/CCT6A                                                                                                           |
| Biological Process | GO:1902806 | regulation of cell cycle G1/S phase transition                          | 22/2279 | 206/18866 | 0.7626823 | 0.8521447 | 0.7710507 | 22 | TRIM39/RPTOR/TFDP1/PRMT2/FBXO7/E2F7/CTDSPL/PCBP4/RIPK1/PTPN6/NACC2/ZNF385A/ARID3A/C10orf99/GFI1B/PLCB1/MIR138-2/RB1/BCL2/CHEK2/PLRG1/EIF4G1 |
| Biological Process | GO:0000717 | nucleotide-excision repair, DNA duplex unwinding                        | 2/2279  | 22/18866  | 0.7633321 | 0.8521447 | 0.7710507 | 2  | XPA/ERCC2                                                                                                                                   |
| Biological Process | GO:0001573 | ganglioside metabolic process                                           | 2/2279  | 22/18866  | 0.7633321 | 0.8521447 | 0.7710507 | 2  | HEXB/ST8SIA6                                                                                                                                |
| Biological Process | GO:0007342 | fusion of sperm to egg plasma membrane involved in single fertilization | 2/2279  | 22/18866  | 0.7633321 | 0.8521447 | 0.7710507 | 2  | CD9/FOLR3                                                                                                                                   |



|                    |            |                                                             |        |          |           |           |           |   |              |
|--------------------|------------|-------------------------------------------------------------|--------|----------|-----------|-----------|-----------|---|--------------|
| Biological Process | GO:0009235 | cobalamin metabolic process                                 | 2/2279 | 22/18866 | 0.7633321 | 0.8521447 | 0.7710507 | 2 | ABCC1/CD320  |
| Biological Process | GO:0010499 | proteasomal ubiquitin-independent protein catabolic process | 2/2279 | 22/18866 | 0.7633321 | 0.8521447 | 0.7710507 | 2 | NFE2L2/PSMB7 |
| Biological Process | GO:0021533 | cell differentiation in hindbrain                           | 2/2279 | 22/18866 | 0.7633321 | 0.8521447 | 0.7710507 | 2 | TTC21B/TTLL1 |
| Biological Process | GO:0034312 | diol biosynthetic process                                   | 2/2279 | 22/18866 | 0.7633321 | 0.8521447 | 0.7710507 | 2 | SPTLC2/SPHK2 |
| Biological Process | GO:0035024 | negative regulation of Rho protein signal transduction      | 2/2279 | 22/18866 | 0.7633321 | 0.8521447 | 0.7710507 | 2 | KANK1/CUL3   |
| Biological Process | GO:0042454 | ribonucleoside catabolic process                            | 2/2279 | 22/18866 | 0.7633321 | 0.8521447 | 0.7710507 | 2 | CDA/PNP      |
| Biological Process | GO:0045655 | regulation of monocyte differentiation                      | 2/2279 | 22/18866 | 0.7633321 | 0.8521447 | 0.7710507 | 2 | FOXP1/INPP5D |
| Biological Process | GO:0048025 | negative regulation of mRNA splicing, via spliceosome       | 2/2279 | 22/18866 | 0.7633321 | 0.8521447 | 0.7710507 | 2 | PCBP4/SFSWAP |
| Biological Process | GO:0051000 | positive regulation of nitric-oxide synthase activity       | 2/2279 | 22/18866 | 0.7633321 | 0.8521447 | 0.7710507 | 2 | TNF/NOS1AP   |

|                    |            |                                                  |         |           |           |           |           |    |                                                                                                                                           |
|--------------------|------------|--------------------------------------------------|---------|-----------|-----------|-----------|-----------|----|-------------------------------------------------------------------------------------------------------------------------------------------|
| Biological Process | GO:0051131 | chaperone-mediated protein complex assembly      | 2/2279  | 22/18866  | 0.7633321 | 0.8521447 | 0.7710507 | 2  | CLU/PFDN6                                                                                                                                 |
| Biological Process | GO:0051900 | regulation of mitochondrial depolarization       | 2/2279  | 22/18866  | 0.7633321 | 0.8521447 | 0.7710507 | 2  | HSH2D/BCL2                                                                                                                                |
| Biological Process | GO:0071157 | negative regulation of cell cycle arrest         | 2/2279  | 22/18866  | 0.7633321 | 0.8521447 | 0.7710507 | 2  | CALR/CHEK2                                                                                                                                |
| Biological Process | GO:0010907 | positive regulation of glucose metabolic process | 4/2279  | 42/18866  | 0.7635309 | 0.8521447 | 0.7710507 | 4  | GPLD1/DYRK2/ESRRB/FOXO1                                                                                                                   |
| Biological Process | GO:0021795 | cerebral cortex cell migration                   | 4/2279  | 42/18866  | 0.7635309 | 0.8521447 | 0.7710507 | 4  | RTN4/DISC1/ZMIZ1/NDEL1                                                                                                                    |
| Biological Process | GO:0098760 | response to interleukin-7                        | 4/2279  | 42/18866  | 0.7635309 | 0.8521447 | 0.7710507 | 4  | P4HB/STAT5A/JAK1/H3C1                                                                                                                     |
| Biological Process | GO:0098761 | cellular response to interleukin-7               | 4/2279  | 42/18866  | 0.7635309 | 0.8521447 | 0.7710507 | 4  | P4HB/STAT5A/JAK1/H3C1                                                                                                                     |
| Biological Process | GO:1901658 | glycosyl compound catabolic process              | 4/2279  | 42/18866  | 0.7635309 | 0.8521447 | 0.7710507 | 4  | CDA/DPYS/UPB1/PNP                                                                                                                         |
| Biological Process | GO:0043583 | ear development                                  | 24/2279 | 224/18866 | 0.7649198 | 0.8535944 | 0.7723626 | 24 | ABR/CEBPD/CDH23/CCM2/SLC44A4/ATP8B1/DLL1/RBPJ/LRIG1/PAX2/FGFR1/TTC39C/RDH10/BMPER/LRP10/MCM2/BCR/KCNQ1/ESRRB/BCL2/NOTCH1/TMC1/PDGFRB/C1QB |

|                    |            |                                                              |         |           |           |           |           |    |                                                                                                                                                                 |
|--------------------|------------|--------------------------------------------------------------|---------|-----------|-----------|-----------|-----------|----|-----------------------------------------------------------------------------------------------------------------------------------------------------------------|
| Biological Process | GO:0032204 | regulation of telomere maintenance                           | 8/2279  | 80/18866  | 0.7655283 | 0.8541732 | 0.7728862 | 8  | TNKS/HMBOX1/RTEL1/YLPM1/SMG6/ERCC1/SLX4/CCT6A                                                                                                                   |
| Biological Process | GO:0048565 | digestive tract development                                  | 14/2279 | 135/18866 | 0.7670886 | 0.8558136 | 0.7743706 | 14 | SMAD3/TNF/EPHB3/TGFBR2/WNT11/RB1/BCL2/NOTCH1/PDGFC/HLX/CHD8/ALDH1A2/NPY/NODAL                                                                                   |
| Biological Process | GO:0043467 | regulation of generation of precursor metabolites and energy | 17/2279 | 162/18866 | 0.7671812 | 0.8558165 | 0.7743731 | 17 | HDAC4/PRKAG2/PFKFB4/RAE1/CBFA2T3/APP/PGAM1/SPHK2/NUP93/DYRK2/SEC13/PPP1CB/PRDM16/ESRRB/PFKFB3/PRKAA1/RUBCNL                                                     |
| Biological Process | GO:0006813 | potassium ion transport                                      | 26/2279 | 242/18866 | 0.7673354 | 0.855888  | 0.7744378 | 26 | KCNJ15/KCNE1/KCNAB2/CASQ2/WWP2/FXYD2/SLC24A4/FXYD1/DNM2/KCNN1/GJA5/KCNQ2/BIN1/NOS1AP/KCNIP1/KCNK6/AQP1/CAB39/KCNQ1/SLC1A3/ABCB8/NEDD4/ANO6/ANK2/SLC12A1/SLC12A7 |
| Biological Process | GO:0031109 | microtubule polymerization or depolymerization               | 12/2279 | 117/18866 | 0.7684068 | 0.8569824 | 0.7754281 | 12 | TBCD/DCTN1/CSNK1D/NDE1/NAV3/NUMA1/MAP1A/TPPP3/ARHGEF2/TUBGCP2/NDEL1/SPEF1                                                                                       |
| Biological Process | GO:0009948 | anterior/posterior axis specification                        | 5/2279  | 52/18866  | 0.7689716 | 0.8573104 | 0.7757249 | 5  | SKI/PCSK6/TMED2/NODAL/OTX2                                                                                                                                      |
| Biological Process | GO:0055078 | sodium ion homeostasis                                       | 5/2279  | 52/18866  | 0.7689716 | 0.8573104 | 0.7757249 | 5  | SLC8A1/COMT/GNAI2/AGTR1/SLC12A1                                                                                                                                 |
| Biological Process | GO:2001258 | negative regulation of cation channel activity               | 5/2279  | 52/18866  | 0.7689716 | 0.8573104 | 0.7757249 | 5  | KCNE1/CASQ2/GSTO1/DYSF/CBARP                                                                                                                                    |
| Biological Process | GO:0015800 | acidic amino acid transport                                  | 7/2279  | 71/18866  | 0.769645  | 0.8576586 | 0.77604   | 7  | LRRC8C/PPFIA1/NF1/SLC1A2/SLC1A6/PER2/SLC1A3                                                                                                                     |

|                    |            |                                                |         |           |           |           |           |    |                                                                                                                                                                    |
|--------------------|------------|------------------------------------------------|---------|-----------|-----------|-----------|-----------|----|--------------------------------------------------------------------------------------------------------------------------------------------------------------------|
| Biological Process | GO:0032371 | regulation of sterol transport                 | 7/2279  | 71/18866  | 0.769645  | 0.8576586 | 0.77604   | 7  | PPARG/ABCG1/PLTP/MIR27A/OSBPL6/NR1H2/ABCA1                                                                                                                         |
| Biological Process | GO:0045739 | positive regulation of DNA repair              | 7/2279  | 71/18866  | 0.769645  | 0.8576586 | 0.77604   | 7  | FAM168A/SPIDR/FOXM1/PARP9/ABRAXAS1/SLF1/BABAM2                                                                                                                     |
| Biological Process | GO:0050891 | multicellular organismal water homeostasis     | 7/2279  | 71/18866  | 0.769645  | 0.8576586 | 0.77604   | 7  | ADCY2/PRKAR1B/ADCY9/AQP1/ADCY4/AQP3/FA2H                                                                                                                           |
| Biological Process | GO:0090596 | sensory organ morphogenesis                    | 29/2279 | 269/18866 | 0.7711834 | 0.8592722 | 0.7775    | 29 | ABR/MFSD2A/SKI/CRB1/HIPK2/SLC44A4/DLL1/LRIG1/HDAC1/GNAT2/PAX2/FGFR1/TTC39C/NF1/SP3/RARG/BCR/PRKCI/MEIS1/BCL2/RPGRIP1/ZHX2/COL5A1/SDK2/BCAR3/NRL/CABP4/TSKU/NECTIN1 |
| Biological Process | GO:0045143 | homologous chromosome segregation              | 6/2279  | 62/18866  | 0.7753706 | 0.8634754 | 0.7813032 | 6  | MEIOB/RNF212/RAD21L1/DMC1/TEX12/TERB2                                                                                                                              |
| Biological Process | GO:0000910 | cytokinesis                                    | 18/2279 | 172/18866 | 0.7759132 | 0.8634754 | 0.7813032 | 18 | CECR2/BRCA2/SETD2/KIF13A/E2F7/CUL3/MYH9/GIT1/UVRAG/SVIL/CSPP1/SNX18/ZFYVE19/KLHL21/PRKCE/BCL2L1/CDC14A/SEPTIN9                                                     |
| Biological Process | GO:0031023 | microtubule organizing center organization     | 14/2279 | 136/18866 | 0.7764078 | 0.8634754 | 0.7813032 | 14 | ARHGEF10/DCTN1/NDE1/BRCA2/CEP135/UVRAG/POC1A/NUMA1/SDCCAG8/SLC16A1/FBXW11/CEP72/NDEL1/CEP295NL                                                                     |
| Biological Process | GO:0003018 | vascular process in circulatory system         | 20/2279 | 190/18866 | 0.7767106 | 0.8634754 | 0.7813032 | 20 | AZU1/ABR/MFSD2A/TJP2/ANGPT1/ITGB1BP1/SLC8A1/GJA5/ABCC2/MIR23A/TGFB1/PTPRJ/HRH1/BCR/PER2/P2RX1/F2R/NPPC/GPR4/AGTR1                                                  |
| Biological Process | GO:0033238 | regulation of cellular amine metabolic process | 8/2279  | 81/18866  | 0.7774781 | 0.8634754 | 0.7813032 | 8  | ODC1/COMT/SLC7A7/PSMF1/ITGB2/PSMB7/PSMD13/PRKN                                                                                                                     |

|                    |            |                                                           |        |          |           |           |           |   |                                                    |
|--------------------|------------|-----------------------------------------------------------|--------|----------|-----------|-----------|-----------|---|----------------------------------------------------|
| Biological Process | GO:0071158 | positive regulation of cell cycle arrest                  | 8/2279 | 81/18866 | 0.7774781 | 0.8634754 | 0.7813032 | 8 | TFDP1/E2F7/PCBP4/ZNF385A/ZBTB17/ARID3A/MED25/CHEK2 |
| Biological Process | GO:0002861 | regulation of inflammatory response to antigenic stimulus | 3/2279 | 33/18866 | 0.7787956 | 0.8634754 | 0.7813032 | 3 | FUT7/IL10/TNF                                      |
| Biological Process | GO:0003338 | metanephros morphogenesis                                 | 3/2279 | 33/18866 | 0.7787956 | 0.8634754 | 0.7813032 | 3 | PAX2/PDGFRB/LIF                                    |
| Biological Process | GO:0010464 | regulation of mesenchymal cell proliferation              | 3/2279 | 33/18866 | 0.7787956 | 0.8634754 | 0.7813032 | 3 | TGFBR2/WNT11/FGFR1                                 |
| Biological Process | GO:0015868 | purine ribonucleotide transport                           | 3/2279 | 33/18866 | 0.7787956 | 0.8634754 | 0.7813032 | 3 | SLC25A25/SLC33A1/SLC25A1                           |
| Biological Process | GO:0042573 | retinoic acid metabolic process                           | 3/2279 | 33/18866 | 0.7787956 | 0.8634754 | 0.7813032 | 3 | DHRS9/RDH10/ALDH1A2                                |
| Biological Process | GO:0042755 | eating behavior                                           | 3/2279 | 33/18866 | 0.7787956 | 0.8634754 | 0.7813032 | 3 | GHRL/TTC21B/CPT1A                                  |
| Biological Process | GO:0044319 | wound healing, spreading of cells                         | 3/2279 | 33/18866 | 0.7787956 | 0.8634754 | 0.7813032 | 3 | RREB1/COL5A1/MRTFA                                 |
| Biological Process | GO:0090505 | epiboly involved in wound healing                         | 3/2279 | 33/18866 | 0.7787956 | 0.8634754 | 0.7813032 | 3 | RREB1/COL5A1/MRTFA                                 |

|                    |            |                                                                                  |         |           |           |           |           |    |                                                                 |
|--------------------|------------|----------------------------------------------------------------------------------|---------|-----------|-----------|-----------|-----------|----|-----------------------------------------------------------------|
| Biological Process | GO:0016339 | calcium-dependent cell-cell adhesion via plasma membrane cell adhesion molecules | 4/2279  | 43/18866  | 0.7796699 | 0.8634754 | 0.7813032 | 4  | CDH23/KIFAP3/PCDH12/CDH11                                       |
| Biological Process | GO:0046688 | response to copper ion                                                           | 4/2279  | 43/18866  | 0.7796699 | 0.8634754 | 0.7813032 | 4  | APP/AQP1/NFE2L2/ATP7B                                           |
| Biological Process | GO:0060119 | inner ear receptor cell development                                              | 4/2279  | 43/18866  | 0.7796699 | 0.8634754 | 0.7813032 | 4  | CDH23/ATP8B1/FGFR1/TMC1                                         |
| Biological Process | GO:0150077 | regulation of neuroinflammatory response                                         | 4/2279  | 43/18866  | 0.7796699 | 0.8634754 | 0.7813032 | 4  | TNFRSF1B/TNF/PTPRC/GRN                                          |
| Biological Process | GO:0021761 | limbic system development                                                        | 11/2279 | 109/18866 | 0.7799587 | 0.8634754 | 0.7813032 | 11 | NRP2/MFSD2A/ZEB2/EIF2B5/HDAC1/FGFR1/RARA/NF1/KIRREL3/NCOA1/ETS1 |
| Biological Process | GO:0043574 | peroxisomal transport                                                            | 7/2279  | 72/18866  | 0.7821347 | 0.8634754 | 0.7813032 | 7  | AMACR/AGXT/CAT/PEX26/ACOX2/HMGCL/UBE2D2                         |
| Biological Process | GO:0035282 | segmentation                                                                     | 10/2279 | 100/18866 | 0.7821582 | 0.8634754 | 0.7813032 | 10 | NRP2/SMAD3/ZEB2/DLL1/RBPJ/MIB1/PCSK6/NOTCH1/TMED2/ALDH1A2       |
| Biological Process | GO:0006336 | DNA replication-independent nucleosome assembly                                  | 5/2279  | 53/18866  | 0.7834046 | 0.8634754 | 0.7813032 | 5  | UBN1/CABIN1/RSF1/CENPM/RUVBL1                                   |
| Biological Process | GO:0042073 | intraciliary transport                                                           | 5/2279  | 53/18866  | 0.7834046 | 0.8634754 | 0.7813032 | 5  | TNPO1/CLUAP1/IFT140/TTC21B/KIFAP3                               |

|                    |            |                                                   |         |           |           |           |           |    |                                                                                                             |
|--------------------|------------|---------------------------------------------------|---------|-----------|-----------|-----------|-----------|----|-------------------------------------------------------------------------------------------------------------|
| Biological Process | GO:0048168 | regulation of neuronal synaptic plasticity        | 5/2279  | 53/18866  | 0.7834046 | 0.8634754 | 0.7813032 | 5  | ZDHC2/APP/SYNGAP1/NF1/SYNPO                                                                                 |
| Biological Process | GO:2000772 | regulation of cellular senescence                 | 5/2279  | 53/18866  | 0.7834046 | 0.8634754 | 0.7813032 | 5  | MAP3K3/AKT3/VASH1/ARNTL/NEK6                                                                                |
| Biological Process | GO:0006633 | fatty acid biosynthetic process                   | 18/2279 | 173/18866 | 0.7840345 | 0.8634754 | 0.7813032 | 18 | PRKAG2/MGLL/LIPC/PRKAB1/ACOT7/ACSS1/MYO5A/NR1H2/ACACB/ACSS2/ACACA/ACSF3/FA2H/SCD/WDTC1/ACADVL/PRKAA1/PRXL2B |
| Biological Process | GO:0001764 | neuron migration                                  | 17/2279 | 164/18866 | 0.7840649 | 0.8634754 | 0.7813032 | 17 | NRP2/APBB2/NDE1/DRGX/DISC1/ZMIZ1/FGFR1/RAPGEF2/KIRREL3/SDCCAG8/ASTN2/MEF2C/ARHGEF2/MARK2/NDEL1/UNC5D/NAV1   |
| Biological Process | GO:0000002 | mitochondrial genome maintenance                  | 2/2279  | 23/18866  | 0.7848369 | 0.8634754 | 0.7813032 | 2  | AKT3/MSTO1                                                                                                  |
| Biological Process | GO:0001956 | positive regulation of neurotransmitter secretion | 2/2279  | 23/18866  | 0.7848369 | 0.8634754 | 0.7813032 | 2  | DNM1L/DTNBP1                                                                                                |
| Biological Process | GO:0006297 | nucleotide-excision repair, DNA gap filling       | 2/2279  | 23/18866  | 0.7848369 | 0.8634754 | 0.7813032 | 2  | POLE/POLD3                                                                                                  |
| Biological Process | GO:0009251 | glucan catabolic process                          | 2/2279  | 23/18866  | 0.7848369 | 0.8634754 | 0.7813032 | 2  | MGAM/PPP1CB                                                                                                 |
| Biological Process | GO:0009310 | amine catabolic process                           | 2/2279  | 23/18866  | 0.7848369 | 0.8634754 | 0.7813032 | 2  | SAT2/HNMT                                                                                                   |

|                    |            |                                                                                           |        |          |           |           |           |   |              |
|--------------------|------------|-------------------------------------------------------------------------------------------|--------|----------|-----------|-----------|-----------|---|--------------|
| Biological Process | GO:0032098 | regulation of appetite                                                                    | 2/2279 | 23/18866 | 0.7848369 | 0.8634754 | 0.7813032 | 2 | GHRL/NPY     |
| Biological Process | GO:0033139 | regulation of peptidyl-serine phosphorylation of STAT protein                             | 2/2279 | 23/18866 | 0.7848369 | 0.8634754 | 0.7813032 | 2 | GGNBP2/LIF   |
| Biological Process | GO:0042401 | cellular biogenic amine biosynthetic process                                              | 2/2279 | 23/18866 | 0.7848369 | 0.8634754 | 0.7813032 | 2 | ODC1/DDC     |
| Biological Process | GO:0042451 | purine nucleoside biosynthetic process                                                    | 2/2279 | 23/18866 | 0.7848369 | 0.8634754 | 0.7813032 | 2 | GUK1/IMPDH1  |
| Biological Process | GO:0042455 | ribonucleoside biosynthetic process                                                       | 2/2279 | 23/18866 | 0.7848369 | 0.8634754 | 0.7813032 | 2 | GUK1/IMPDH1  |
| Biological Process | GO:0043162 | ubiquitin-dependent protein catabolic process via the multivesicular body sorting pathway | 2/2279 | 23/18866 | 0.7848369 | 0.8634754 | 0.7813032 | 2 | NEDD4/MVB12A |
| Biological Process | GO:0046129 | purine ribonucleoside biosynthetic process                                                | 2/2279 | 23/18866 | 0.7848369 | 0.8634754 | 0.7813032 | 2 | GUK1/IMPDH1  |
| Biological Process | GO:0051220 | cytoplasmic sequestering of protein                                                       | 2/2279 | 23/18866 | 0.7848369 | 0.8634754 | 0.7813032 | 2 | IL10/SUFU    |
| Biological Process | GO:0060445 | branching involved in salivary gland morphogenesis                                        | 2/2279 | 23/18866 | 0.7848369 | 0.8634754 | 0.7813032 | 2 | TNF/FGFR1    |



|                    |            |                                                                              |         |           |           |           |           |    |  |                                                                                                                                                                                                                                                          |
|--------------------|------------|------------------------------------------------------------------------------|---------|-----------|-----------|-----------|-----------|----|--|----------------------------------------------------------------------------------------------------------------------------------------------------------------------------------------------------------------------------------------------------------|
| Biological Process | GO:0071218 | cellular response to misfolded protein                                       | 2/2279  | 23/18866  | 0.7848369 | 0.8634754 | 0.7813032 | 2  |  | CUL3/POMT2                                                                                                                                                                                                                                               |
| Biological Process | GO:1900017 | positive regulation of cytokine production involved in inflammatory response | 2/2279  | 23/18866  | 0.7848369 | 0.8634754 | 0.7813032 | 2  |  | TNF/NOD2                                                                                                                                                                                                                                                 |
| Biological Process | GO:1901032 | negative regulation of response to reactive oxygen species                   | 2/2279  | 23/18866  | 0.7848369 | 0.8634754 | 0.7813032 | 2  |  | IL10/NFE2L2                                                                                                                                                                                                                                              |
| Biological Process | GO:1901984 | negative regulation of protein acetylation                                   | 2/2279  | 23/18866  | 0.7848369 | 0.8634754 | 0.7813032 | 2  |  | CTBP1/PIH1D1                                                                                                                                                                                                                                             |
| Biological Process | GO:1902259 | regulation of delayed rectifier potassium channel activity                   | 2/2279  | 23/18866  | 0.7848369 | 0.8634754 | 0.7813032 | 2  |  | KCNE1/NOS1AP                                                                                                                                                                                                                                             |
| Biological Process | GO:1903206 | negative regulation of hydrogen peroxide-induced cell death                  | 2/2279  | 23/18866  | 0.7848369 | 0.8634754 | 0.7813032 | 2  |  | IL10/NFE2L2                                                                                                                                                                                                                                              |
| Biological Process | GO:2000773 | negative regulation of cellular senescence                                   | 2/2279  | 23/18866  | 0.7848369 | 0.8634754 | 0.7813032 | 2  |  | MAP3K3/AKT3                                                                                                                                                                                                                                              |
| Biological Process | GO:0048477 | oogenesis                                                                    | 9/2279  | 91/18866  | 0.7850931 | 0.8634754 | 0.7813032 | 9  |  | HEXB/BRCA2/KMT2D/BMPR1B/PPP2R1A/BCL2/DMC1/NPPC/ERCC1                                                                                                                                                                                                     |
| Biological Process | GO:0007018 | microtubule-based movement                                                   | 40/2279 | 368/18866 | 0.7861975 | 0.8634754 | 0.7813032 | 40 |  | PRKCZ/KIF13B/DNAH3/NDE1/TNPO1/KIF13A/SPG7/DYNC1H1/PLTP/RFX3/APP/RNASE10/BICD2/CLUAP1/CNIH2/KIF21B/DEFB1/HTT/IQCG/KIF5C/IFT140/KIF1B/TTC21B/STK36/MAP1A/ARMC2/KIFAP3/AP3D1/DNAI2/FBXW11/NDEL1/KIFC3/DTNBP1/CCNYL1/TTL1/NPHP4/CFAP221/KATNIP/CFAP61/CFAP46 |

|                    |            |                                                                    |        |          |           |           |           |   |        |
|--------------------|------------|--------------------------------------------------------------------|--------|----------|-----------|-----------|-----------|---|--------|
| Biological Process | GO:0000012 | single strand break repair                                         | 1/2279 | 12/18866 | 0.7867705 | 0.8634754 | 0.7813032 | 1 | TDP1   |
| Biological Process | GO:0002024 | diet induced thermogenesis                                         | 1/2279 | 12/18866 | 0.7867705 | 0.8634754 | 0.7813032 | 1 | SORL1  |
| Biological Process | GO:0002551 | mast cell chemotaxis                                               | 1/2279 | 12/18866 | 0.7867705 | 0.8634754 | 0.7813032 | 1 | PIK3CD |
| Biological Process | GO:0002713 | negative regulation of B cell mediated immunity                    | 1/2279 | 12/18866 | 0.7867705 | 0.8634754 | 0.7813032 | 1 | PTPN6  |
| Biological Process | GO:0002863 | positive regulation of inflammatory response to antigenic stimulus | 1/2279 | 12/18866 | 0.7867705 | 0.8634754 | 0.7813032 | 1 | TNF    |
| Biological Process | GO:0002890 | negative regulation of immunoglobulin mediated immune response     | 1/2279 | 12/18866 | 0.7867705 | 0.8634754 | 0.7813032 | 1 | PTPN6  |
| Biological Process | GO:0006216 | cytidine catabolic process                                         | 1/2279 | 12/18866 | 0.7867705 | 0.8634754 | 0.7813032 | 1 | CDA    |
| Biological Process | GO:0006563 | L-serine metabolic process                                         | 1/2279 | 12/18866 | 0.7867705 | 0.8634754 | 0.7813032 | 1 | CBS    |
| Biological Process | GO:0007320 | insemination                                                       | 1/2279 | 12/18866 | 0.7867705 | 0.8634754 | 0.7813032 | 1 | P2RX1  |

|                    |            |                                                    |        |          |           |           |           |   |         |
|--------------------|------------|----------------------------------------------------|--------|----------|-----------|-----------|-----------|---|---------|
| Biological Process | GO:0009972 | cytidine deamination                               | 1/2279 | 12/18866 | 0.7867705 | 0.8634754 | 0.7813032 | 1 | CDA     |
| Biological Process | GO:0010454 | negative regulation of cell fate commitment        | 1/2279 | 12/18866 | 0.7867705 | 0.8634754 | 0.7813032 | 1 | LOXL3   |
| Biological Process | GO:0014831 | gastro-intestinal system smooth muscle contraction | 1/2279 | 12/18866 | 0.7867705 | 0.8634754 | 0.7813032 | 1 | GHRL    |
| Biological Process | GO:0015780 | nucleotide-sugar transmembrane transport           | 1/2279 | 12/18866 | 0.7867705 | 0.8634754 | 0.7813032 | 1 | SLC35C2 |
| Biological Process | GO:0016188 | synaptic vesicle maturation                        | 1/2279 | 12/18866 | 0.7867705 | 0.8634754 | 0.7813032 | 1 | ZDHC2   |
| Biological Process | GO:0016554 | cytidine to uridine editing                        | 1/2279 | 12/18866 | 0.7867705 | 0.8634754 | 0.7813032 | 1 | RBM47   |
| Biological Process | GO:0021559 | trigeminal nerve development                       | 1/2279 | 12/18866 | 0.7867705 | 0.8634754 | 0.7813032 | 1 | DRGX    |
| Biological Process | GO:0030208 | dermatan sulfate biosynthetic process              | 1/2279 | 12/18866 | 0.7867705 | 0.8634754 | 0.7813032 | 1 | DSE     |
| Biological Process | GO:0030311 | poly-N-acetyllactosamine biosynthetic process      | 1/2279 | 12/18866 | 0.7867705 | 0.8634754 | 0.7813032 | 1 | B3GNT2  |

|                    |            |                                                 |        |          |           |           |           |   |       |
|--------------------|------------|-------------------------------------------------|--------|----------|-----------|-----------|-----------|---|-------|
| Biological Process | GO:0031987 | locomotion involved in locomotory behavior      | 1/2279 | 12/18866 | 0.7867705 | 0.8634754 | 0.7813032 | 1 | MYO5A |
| Biological Process | GO:0032490 | detection of molecule of bacterial origin       | 1/2279 | 12/18866 | 0.7867705 | 0.8634754 | 0.7813032 | 1 | NOD2  |
| Biological Process | GO:0032525 | somite rostral/caudal axis specification        | 1/2279 | 12/18866 | 0.7867705 | 0.8634754 | 0.7813032 | 1 | TMED2 |
| Biological Process | GO:0032905 | transforming growth factor beta1 production     | 1/2279 | 12/18866 | 0.7867705 | 0.8634754 | 0.7813032 | 1 | THBS1 |
| Biological Process | GO:0033234 | negative regulation of protein sumoylation      | 1/2279 | 12/18866 | 0.7867705 | 0.8634754 | 0.7813032 | 1 | RELA  |
| Biological Process | GO:0033523 | histone H2B ubiquitination                      | 1/2279 | 12/18866 | 0.7867705 | 0.8634754 | 0.7813032 | 1 | RNF40 |
| Biological Process | GO:0033690 | positive regulation of osteoblast proliferation | 1/2279 | 12/18866 | 0.7867705 | 0.8634754 | 0.7813032 | 1 | LTF   |
| Biological Process | GO:0035766 | cell chemotaxis to fibroblast growth factor     | 1/2279 | 12/18866 | 0.7867705 | 0.8634754 | 0.7813032 | 1 | FGFR1 |
| Biological Process | GO:0036462 | TRAIL-activated apoptotic signaling pathway     | 1/2279 | 12/18866 | 0.7867705 | 0.8634754 | 0.7813032 | 1 | FADD  |

|                    |            |                                               |        |          |           |           |           |   |        |
|--------------------|------------|-----------------------------------------------|--------|----------|-----------|-----------|-----------|---|--------|
| Biological Process | GO:0042182 | ketone catabolic process                      | 1/2279 | 12/18866 | 0.7867705 | 0.8634754 | 0.7813032 | 1 | CYP4F3 |
| Biological Process | GO:0042363 | fat-soluble vitamin catabolic process         | 1/2279 | 12/18866 | 0.7867705 | 0.8634754 | 0.7813032 | 1 | CYP4F3 |
| Biological Process | GO:0042416 | dopamine biosynthetic process                 | 1/2279 | 12/18866 | 0.7867705 | 0.8634754 | 0.7813032 | 1 | DDC    |
| Biological Process | GO:0045760 | positive regulation of action potential       | 1/2279 | 12/18866 | 0.7867705 | 0.8634754 | 0.7813032 | 1 | NOS1AP |
| Biological Process | GO:0046087 | cytidine metabolic process                    | 1/2279 | 12/18866 | 0.7867705 | 0.8634754 | 0.7813032 | 1 | CDA    |
| Biological Process | GO:0046541 | saliva secretion                              | 1/2279 | 12/18866 | 0.7867705 | 0.8634754 | 0.7813032 | 1 | AQP1   |
| Biological Process | GO:0051013 | microtubule severing                          | 1/2279 | 12/18866 | 0.7867705 | 0.8634754 | 0.7813032 | 1 | TTLL11 |
| Biological Process | GO:0051095 | regulation of helicase activity               | 1/2279 | 12/18866 | 0.7867705 | 0.8634754 | 0.7813032 | 1 | MCM2   |
| Biological Process | GO:0051549 | positive regulation of keratinocyte migration | 1/2279 | 12/18866 | 0.7867705 | 0.8634754 | 0.7813032 | 1 | IQSEC1 |

|                    |            |                                                        |        |          |           |           |           |   |       |
|--------------------|------------|--------------------------------------------------------|--------|----------|-----------|-----------|-----------|---|-------|
| Biological Process | GO:0051583 | dopamine uptake involved in synaptic transmission      | 1/2279 | 12/18866 | 0.7867705 | 0.8634754 | 0.7813032 | 1 | PRKN  |
| Biological Process | GO:0051639 | actin filament network formation                       | 1/2279 | 12/18866 | 0.7867705 | 0.8634754 | 0.7813032 | 1 | ACTN1 |
| Biological Process | GO:0051657 | maintenance of organelle location                      | 1/2279 | 12/18866 | 0.7867705 | 0.8634754 | 0.7813032 | 1 | UVRAG |
| Biological Process | GO:0051934 | catecholamine uptake involved in synaptic transmission | 1/2279 | 12/18866 | 0.7867705 | 0.8634754 | 0.7813032 | 1 | PRKN  |
| Biological Process | GO:0055015 | ventricular cardiac muscle cell development            | 1/2279 | 12/18866 | 0.7867705 | 0.8634754 | 0.7813032 | 1 | FHL2  |
| Biological Process | GO:0060442 | branching involved in prostate gland morphogenesis     | 1/2279 | 12/18866 | 0.7867705 | 0.8634754 | 0.7813032 | 1 | RXRA  |
| Biological Process | GO:0060536 | cartilage morphogenesis                                | 1/2279 | 12/18866 | 0.7867705 | 0.8634754 | 0.7813032 | 1 | MEF2C |
| Biological Process | GO:0060736 | prostate gland growth                                  | 1/2279 | 12/18866 | 0.7867705 | 0.8634754 | 0.7813032 | 1 | UBE3A |
| Biological Process | GO:0060788 | ectodermal placode formation                           | 1/2279 | 12/18866 | 0.7867705 | 0.8634754 | 0.7813032 | 1 | HDAC1 |

|                    |            |                                                          |        |          |           |           |           |   |         |
|--------------------|------------|----------------------------------------------------------|--------|----------|-----------|-----------|-----------|---|---------|
| Biological Process | GO:0060900 | embryonic camera-type eye formation                      | 1/2279 | 12/18866 | 0.7867705 | 0.8634754 | 0.7813032 | 1 | PAX2    |
| Biological Process | GO:0061709 | reticulophagy                                            | 1/2279 | 12/18866 | 0.7867705 | 0.8634754 | 0.7813032 | 1 | STING1  |
| Biological Process | GO:0070601 | centromeric sister chromatid cohesion                    | 1/2279 | 12/18866 | 0.7867705 | 0.8634754 | 0.7813032 | 1 | PPP2R1A |
| Biological Process | GO:0071044 | histone mRNA catabolic process                           | 1/2279 | 12/18866 | 0.7867705 | 0.8634754 | 0.7813032 | 1 | LSM1    |
| Biological Process | GO:0071073 | positive regulation of phospholipid biosynthetic process | 1/2279 | 12/18866 | 0.7867705 | 0.8634754 | 0.7813032 | 1 | FPR2    |
| Biological Process | GO:0071257 | cellular response to electrical stimulus                 | 1/2279 | 12/18866 | 0.7867705 | 0.8634754 | 0.7813032 | 1 | PALM    |
| Biological Process | GO:0071340 | skeletal muscle acetylcholine-gated channel clustering   | 1/2279 | 12/18866 | 0.7867705 | 0.8634754 | 0.7813032 | 1 | COLQ    |
| Biological Process | GO:0071472 | cellular response to salt stress                         | 1/2279 | 12/18866 | 0.7867705 | 0.8634754 | 0.7813032 | 1 | AQP1    |
| Biological Process | GO:0071697 | ectodermal placode morphogenesis                         | 1/2279 | 12/18866 | 0.7867705 | 0.8634754 | 0.7813032 | 1 | HDAC1   |

|                    |            |                                                                                            |        |          |           |           |           |   |         |
|--------------------|------------|--------------------------------------------------------------------------------------------|--------|----------|-----------|-----------|-----------|---|---------|
| Biological Process | GO:0071712 | ER-associated misfolded protein catabolic process                                          | 1/2279 | 12/18866 | 0.7867705 | 0.8634754 | 0.7813032 | 1 | POMT2   |
| Biological Process | GO:0072178 | nephric duct morphogenesis                                                                 | 1/2279 | 12/18866 | 0.7867705 | 0.8634754 | 0.7813032 | 1 | PAX2    |
| Biological Process | GO:0072520 | seminiferous tubule development                                                            | 1/2279 | 12/18866 | 0.7867705 | 0.8634754 | 0.7813032 | 1 | RAD21L1 |
| Biological Process | GO:0090085 | regulation of protein deubiquitination                                                     | 1/2279 | 12/18866 | 0.7867705 | 0.8634754 | 0.7813032 | 1 | TNIP1   |
| Biological Process | GO:0090394 | negative regulation of excitatory postsynaptic potential                                   | 1/2279 | 12/18866 | 0.7867705 | 0.8634754 | 0.7813032 | 1 | S1PR2   |
| Biological Process | GO:0097201 | negative regulation of transcription from RNA polymerase II promoter in response to stress | 1/2279 | 12/18866 | 0.7867705 | 0.8634754 | 0.7813032 | 1 | NCK2    |
| Biological Process | GO:0097340 | inhibition of cysteine-type endopeptidase activity                                         | 1/2279 | 12/18866 | 0.7867705 | 0.8634754 | 0.7813032 | 1 | NOL3    |
| Biological Process | GO:0097341 | zymogen inhibition                                                                         | 1/2279 | 12/18866 | 0.7867705 | 0.8634754 | 0.7813032 | 1 | NOL3    |
| Biological Process | GO:0099151 | regulation of postsynaptic density assembly                                                | 1/2279 | 12/18866 | 0.7867705 | 0.8634754 | 0.7813032 | 1 | NRXN1   |



|                    |            |                                                                             |        |          |           |           |           |   |        |
|--------------------|------------|-----------------------------------------------------------------------------|--------|----------|-----------|-----------|-----------|---|--------|
| Biological Process | GO:1900115 | extracellular regulation of signal transduction                             | 1/2279 | 12/18866 | 0.7867705 | 0.8634754 | 0.7813032 | 1 | LTBP1  |
| Biological Process | GO:1900116 | extracellular negative regulation of signal transduction                    | 1/2279 | 12/18866 | 0.7867705 | 0.8634754 | 0.7813032 | 1 | LTBP1  |
| Biological Process | GO:1902018 | negative regulation of cilium assembly                                      | 1/2279 | 12/18866 | 0.7867705 | 0.8634754 | 0.7813032 | 1 | DNM2   |
| Biological Process | GO:1902287 | semaphorin-plexin signaling pathway involved in axon guidance               | 1/2279 | 12/18866 | 0.7867705 | 0.8634754 | 0.7813032 | 1 | PLXNC1 |
| Biological Process | GO:1902510 | regulation of apoptotic DNA fragmentation                                   | 1/2279 | 12/18866 | 0.7867705 | 0.8634754 | 0.7813032 | 1 | PAM16  |
| Biological Process | GO:1902950 | regulation of dendritic spine maintenance                                   | 1/2279 | 12/18866 | 0.7867705 | 0.8634754 | 0.7813032 | 1 | ZMYND8 |
| Biological Process | GO:1903405 | protein localization to nuclear body                                        | 1/2279 | 12/18866 | 0.7867705 | 0.8634754 | 0.7813032 | 1 | CCT6A  |
| Biological Process | GO:1903441 | protein localization to ciliary membrane                                    | 1/2279 | 12/18866 | 0.7867705 | 0.8634754 | 0.7813032 | 1 | LZTFL1 |
| Biological Process | GO:1904816 | positive regulation of protein localization to chromosome, telomeric region | 1/2279 | 12/18866 | 0.7867705 | 0.8634754 | 0.7813032 | 1 | CCT6A  |

|                    |            |                                                           |        |          |           |           |           |   |                                     |
|--------------------|------------|-----------------------------------------------------------|--------|----------|-----------|-----------|-----------|---|-------------------------------------|
| Biological Process | GO:1904847 | regulation of cell chemotaxis to fibroblast growth factor | 1/2279 | 12/18866 | 0.7867705 | 0.8634754 | 0.7813032 | 1 | FGFR1                               |
| Biological Process | GO:1904867 | protein localization to Cajal body                        | 1/2279 | 12/18866 | 0.7867705 | 0.8634754 | 0.7813032 | 1 | CCT6A                               |
| Biological Process | GO:1905214 | regulation of RNA binding                                 | 1/2279 | 12/18866 | 0.7867705 | 0.8634754 | 0.7813032 | 1 | EIF4G1                              |
| Biological Process | GO:1905522 | negative regulation of macrophage migration               | 1/2279 | 12/18866 | 0.7867705 | 0.8634754 | 0.7813032 | 1 | MIR24-2                             |
| Biological Process | GO:2000302 | positive regulation of synaptic vesicle exocytosis        | 1/2279 | 12/18866 | 0.7867705 | 0.8634754 | 0.7813032 | 1 | DNM1L                               |
| Biological Process | GO:2000767 | positive regulation of cytoplasmic translation            | 1/2279 | 12/18866 | 0.7867705 | 0.8634754 | 0.7813032 | 1 | PKM                                 |
| Biological Process | GO:2001053 | regulation of mesenchymal cell apoptotic process          | 1/2279 | 12/18866 | 0.7867705 | 0.8634754 | 0.7813032 | 1 | PAX2                                |
| Biological Process | GO:2001204 | regulation of osteoclast development                      | 1/2279 | 12/18866 | 0.7867705 | 0.8634754 | 0.7813032 | 1 | LTF                                 |
| Biological Process | GO:0006521 | regulation of cellular amino acid metabolic process       | 6/2279 | 63/18866 | 0.788453  | 0.865122  | 0.7827931 | 6 | ODC1/COMT/SLC7A7/PSMF1/PSMB7/PSMD13 |

|                    |            |                                                                       |         |           |           |           |           |    |                                                                     |
|--------------------|------------|-----------------------------------------------------------------------|---------|-----------|-----------|-----------|-----------|----|---------------------------------------------------------------------|
| Biological Process | GO:0031571 | mitotic G1 DNA damage checkpoint                                      | 6/2279  | 63/18866  | 0.788453  | 0.865122  | 0.7827931 | 6  | TFDP1/E2F7/PCBP4/ZNF385A/ARID3A/CHEK2                               |
| Biological Process | GO:0022617 | extracellular matrix disassembly                                      | 8/2279  | 82/18866  | 0.7889769 | 0.865497  | 0.7831324 | 8  | ELANE/CTSG/TIMP2/BSG/SH3PXD2B/TGFB1/ETS1/FLOT1                      |
| Biological Process | GO:1903671 | negative regulation of sprouting angiogenesis                         | 8/2279  | 82/18866  | 0.7889769 | 0.865497  | 0.7831324 | 8  | ITGB1BP1/MIR199A1/THBS1/MIR24-2/EPN2/MIR138-2/MIR199A2/NOTCH1       |
| Biological Process | GO:0001578 | microtubule bundle formation                                          | 10/2279 | 101/18866 | 0.7924473 | 0.8691033 | 0.7863955 | 10 | DNAJB13/CCDC66/IQCG/NUMA1/TPPP3/ARMC2/DNAI2/TTL1/NAV1/CFAP46        |
| Biological Process | GO:1990542 | mitochondrial transmembrane transport                                 | 10/2279 | 101/18866 | 0.7924473 | 0.8691033 | 0.7863955 | 10 | PRKAG2/SLC25A37/PAM16/SFXN1/ACACB/ACACA/TIMM44/CPT1A/SLC25A1/ATP5PD |
| Biological Process | GO:0005977 | glycogen metabolic process                                            | 7/2279  | 73/18866  | 0.7941126 | 0.8708291 | 0.7879571 | 7  | PRKAG2/DYRK2/PPP1CB/ESRRB/PER2/PCDH12/RUBCNL                        |
| Biological Process | GO:0006099 | tricarboxylic acid cycle                                              | 3/2279  | 34/18866  | 0.7960033 | 0.8718962 | 0.7889226 | 3  | DHTKD1/OGDH/SDHD                                                    |
| Biological Process | GO:0031112 | positive regulation of microtubule polymerization or depolymerization | 3/2279  | 34/18866  | 0.7960033 | 0.8718962 | 0.7889226 | 3  | DCTN1/NAV3/NUMA1                                                    |
| Biological Process | GO:0032212 | positive regulation of telomere maintenance via telomerase            | 3/2279  | 34/18866  | 0.7960033 | 0.8718962 | 0.7889226 | 3  | TNKS/HMBOX1/CCT6A                                                   |

|                    |            |                                                                  |        |          |           |           |           |   |                                 |
|--------------------|------------|------------------------------------------------------------------|--------|----------|-----------|-----------|-----------|---|---------------------------------|
| Biological Process | GO:0036474 | cell death in response to hydrogen peroxide                      | 3/2279 | 34/18866 | 0.7960033 | 0.8718962 | 0.7889226 | 3 | IL10/RIPK1/NFE2L2               |
| Biological Process | GO:0045907 | positive regulation of vasoconstriction                          | 3/2279 | 34/18866 | 0.7960033 | 0.8718962 | 0.7889226 | 3 | GJA5/HRH1/F2R                   |
| Biological Process | GO:0048566 | embryonic digestive tract development                            | 3/2279 | 34/18866 | 0.7960033 | 0.8718962 | 0.7889226 | 3 | TNF/HLX/ALDH1A2                 |
| Biological Process | GO:0048665 | neuron fate specification                                        | 3/2279 | 34/18866 | 0.7960033 | 0.8718962 | 0.7889226 | 3 | SUFU/DLL1/FEV                   |
| Biological Process | GO:0060795 | cell fate commitment involved in formation of primary germ layer | 3/2279 | 34/18866 | 0.7960033 | 0.8718962 | 0.7889226 | 3 | PAX2/FGFR1/NODAL                |
| Biological Process | GO:0090504 | epiboly                                                          | 3/2279 | 34/18866 | 0.7960033 | 0.8718962 | 0.7889226 | 3 | RREB1/COL5A1/MRTFA              |
| Biological Process | GO:2000352 | negative regulation of endothelial cell apoptotic process        | 3/2279 | 34/18866 | 0.7960033 | 0.8718962 | 0.7889226 | 3 | ANGPT1/TNFAIP3/NFE2L2           |
| Biological Process | GO:0000387 | spliceosomal snRNP assembly                                      | 5/2279 | 54/18866 | 0.7971289 | 0.8727266 | 0.789674  | 5 | SNRPD3/PRPF8/SNUPN/PRPF6/GEMIN4 |
| Biological Process | GO:0006376 | mRNA splice site selection                                       | 5/2279 | 54/18866 | 0.7971289 | 0.8727266 | 0.789674  | 5 | SF1/SFSWAP/CELF2/NOL3/CELF1     |

|                    |            |                                                      |        |          |           |           |           |   |                                       |
|--------------------|------------|------------------------------------------------------|--------|----------|-----------|-----------|-----------|---|---------------------------------------|
| Biological Process | GO:0034724 | DNA replication-independent nucleosome organization  | 5/2279 | 54/18866 | 0.7971289 | 0.8727266 | 0.789674  | 5 | UBN1/CABIN1/RSF1/CENPM/RUVBL1         |
| Biological Process | GO:0051438 | regulation of ubiquitin-protein transferase activity | 5/2279 | 54/18866 | 0.7971289 | 0.8727266 | 0.789674  | 5 | FZR1/SMAD7/AXIN1/DNM1L/BAG5           |
| Biological Process | GO:0033344 | cholesterol efflux                                   | 6/2279 | 64/18866 | 0.8009454 | 0.876501  | 0.7930892 | 6 | ABCG1/PLTP/MIR27A/NR1H2/ABCA1/NPC1    |
| Biological Process | GO:0044783 | G1 DNA damage checkpoint                             | 6/2279 | 64/18866 | 0.8009454 | 0.876501  | 0.7930892 | 6 | TFDP1/E2F7/PCBP4/ZNF385A/ARID3A/CHEK2 |
| Biological Process | GO:0044819 | mitotic G1/S transition checkpoint                   | 6/2279 | 64/18866 | 0.8009454 | 0.876501  | 0.7930892 | 6 | TFDP1/E2F7/PCBP4/ZNF385A/ARID3A/CHEK2 |
| Biological Process | GO:0046794 | transport of virus                                   | 6/2279 | 64/18866 | 0.8009454 | 0.876501  | 0.7930892 | 6 | RAE1/NUP93/SEC13/TPCN2/EPS15/MVB12A   |
| Biological Process | GO:0001759 | organ induction                                      | 2/2279 | 24/18866 | 0.8046024 | 0.8782695 | 0.7946894 | 2 | WNT11/FGFR1                           |
| Biological Process | GO:0002438 | acute inflammatory response to antigenic stimulus    | 2/2279 | 24/18866 | 0.8046024 | 0.8782695 | 0.7946894 | 2 | ELANE/FUT7                            |
| Biological Process | GO:0010528 | regulation of transposition                          | 2/2279 | 24/18866 | 0.8046024 | 0.8782695 | 0.7946894 | 2 | PIWIL4/MORC1                          |

|                    |            |                                                                         |        |          |           |           |           |   |                |
|--------------------|------------|-------------------------------------------------------------------------|--------|----------|-----------|-----------|-----------|---|----------------|
| Biological Process | GO:0010529 | negative regulation of transposition                                    | 2/2279 | 24/18866 | 0.8046024 | 0.8782695 | 0.7946894 | 2 | PIWIL4/MORC1   |
| Biological Process | GO:0010804 | negative regulation of tumor necrosis factor-mediated signaling pathway | 2/2279 | 24/18866 | 0.8046024 | 0.8782695 | 0.7946894 | 2 | TRAIP/MIR24-2  |
| Biological Process | GO:0016556 | mRNA modification                                                       | 2/2279 | 24/18866 | 0.8046024 | 0.8782695 | 0.7946894 | 2 | PUS7/METTL8    |
| Biological Process | GO:0019883 | antigen processing and presentation of endogenous antigen               | 2/2279 | 24/18866 | 0.8046024 | 0.8782695 | 0.7946894 | 2 | HLA-C/HLA-F    |
| Biological Process | GO:0021544 | subpallium development                                                  | 2/2279 | 24/18866 | 0.8046024 | 0.8782695 | 0.7946894 | 2 | SECISBP2/INHBA |
| Biological Process | GO:0021904 | dorsal/ventral neural tube patterning                                   | 2/2279 | 24/18866 | 0.8046024 | 0.8782695 | 0.7946894 | 2 | SUFU/PAX7      |
| Biological Process | GO:0035268 | protein mannosylation                                                   | 2/2279 | 24/18866 | 0.8046024 | 0.8782695 | 0.7946894 | 2 | POMT2/B4GAT1   |
| Biological Process | GO:0051882 | mitochondrial depolarization                                            | 2/2279 | 24/18866 | 0.8046024 | 0.8782695 | 0.7946894 | 2 | HSH2D/BCL2     |
| Biological Process | GO:0060295 | regulation of cilium movement involved in cell motility                 | 2/2279 | 24/18866 | 0.8046024 | 0.8782695 | 0.7946894 | 2 | RNASE10/DEFB1  |

|                    |            |                                                                    |        |          |           |           |           |   |                                               |
|--------------------|------------|--------------------------------------------------------------------|--------|----------|-----------|-----------|-----------|---|-----------------------------------------------|
| Biological Process | GO:0060444 | branching involved in mammary gland duct morphogenesis             | 2/2279 | 24/18866 | 0.8046024 | 0.8782695 | 0.7946894 | 2 | LRP5L/VDR                                     |
| Biological Process | GO:0062009 | secondary palate development                                       | 2/2279 | 24/18866 | 0.8046024 | 0.8782695 | 0.7946894 | 2 | TGFBR2/WNT11                                  |
| Biological Process | GO:0070193 | synaptonemal complex organization                                  | 2/2279 | 24/18866 | 0.8046024 | 0.8782695 | 0.7946894 | 2 | RAD21L1/TEX12                                 |
| Biological Process | GO:0071294 | cellular response to zinc ion                                      | 2/2279 | 24/18866 | 0.8046024 | 0.8782695 | 0.7946894 | 2 | CREB1/MTF1                                    |
| Biological Process | GO:0098743 | cell aggregation                                                   | 2/2279 | 24/18866 | 0.8046024 | 0.8782695 | 0.7946894 | 2 | BMPR1B/LTF                                    |
| Biological Process | GO:1900118 | negative regulation of execution phase of apoptosis                | 2/2279 | 24/18866 | 0.8046024 | 0.8782695 | 0.7946894 | 2 | PAM16/BCL2L1                                  |
| Biological Process | GO:1902019 | regulation of cilium-dependent cell motility                       | 2/2279 | 24/18866 | 0.8046024 | 0.8782695 | 0.7946894 | 2 | RNASE10/DEFB1                                 |
| Biological Process | GO:1904666 | regulation of ubiquitin protein ligase activity                    | 2/2279 | 24/18866 | 0.8046024 | 0.8782695 | 0.7946894 | 2 | FZR1/DNM1L                                    |
| Biological Process | GO:0002532 | production of molecular mediator involved in inflammatory response | 9/2279 | 93/18866 | 0.806011  | 0.8782695 | 0.7946894 | 9 | MIR140/MEFV/TNF/GRN/NOD2/PER1/P2RX1/PLD3/CD96 |

|                    |            |                                             |         |           |           |           |           |    |                                                                      |
|--------------------|------------|---------------------------------------------|---------|-----------|-----------|-----------|-----------|----|----------------------------------------------------------------------|
| Biological Process | GO:0045132 | meiotic chromosome segregation              | 9/2279  | 93/18866  | 0.806011  | 0.8782695 | 0.7946894 | 9  | EME1/MEIOB/RNF212/PPP2R1A/RAD21L1/DMC1/SLX4/TEX12/TERB2              |
| Biological Process | GO:0006418 | tRNA aminoacylation for protein translation | 4/2279  | 45/18866  | 0.8093124 | 0.8782695 | 0.7946894 | 4  | CARS2/EARS2/MARS1/YARS1                                              |
| Biological Process | GO:0060443 | mammary gland morphogenesis                 | 4/2279  | 45/18866  | 0.8093124 | 0.8782695 | 0.7946894 | 4  | LRP5L/VDR/CSF1R/TGFBR2                                               |
| Biological Process | GO:0016233 | telomere capping                            | 5/2279  | 55/18866  | 0.8101593 | 0.8782695 | 0.7946894 | 5  | TNKS/RTEL1/SMG6/ERCC1/TFIP11                                         |
| Biological Process | GO:0032781 | positive regulation of ATPase activity      | 5/2279  | 55/18866  | 0.8101593 | 0.8782695 | 0.7946894 | 5  | UHRF1/HSCB/PFN1/DNAJB6/AHSA2P                                        |
| Biological Process | GO:0036297 | interstrand cross-link repair               | 5/2279  | 55/18866  | 0.8101593 | 0.8782695 | 0.7946894 | 5  | EME1/FANCA/ERCC1/SLX4/XPA                                            |
| Biological Process | GO:0006885 | regulation of pH                            | 10/2279 | 103/18866 | 0.8119507 | 0.8782695 | 0.7946894 | 10 | TM9SF4/SLC11A1/ATP6V1B2/GRN/BCL2/ATP6V0B/UBE3A/CLN5/ATP6V0C/ATP6V1C1 |
| Biological Process | GO:0002183 | cytoplasmic translational initiation        | 3/2279  | 35/18866  | 0.8120768 | 0.8782695 | 0.7946894 | 3  | EIF3M/EIF3H/EIF4G1                                                   |
| Biological Process | GO:0007435 | salivary gland morphogenesis                | 3/2279  | 35/18866  | 0.8120768 | 0.8782695 | 0.7946894 | 3  | TNF/FGFR1/TGFB1                                                      |



|                    |            |                                                            |        |          |           |           |           |   |                    |
|--------------------|------------|------------------------------------------------------------|--------|----------|-----------|-----------|-----------|---|--------------------|
| Biological Process | GO:0007603 | phototransduction, visible light                           | 3/2279 | 35/18866 | 0.8120768 | 0.8782695 | 0.7946894 | 3 | PDE6A/GNA11/GRK7   |
| Biological Process | GO:0014046 | dopamine secretion                                         | 3/2279 | 35/18866 | 0.8120768 | 0.8782695 | 0.7946894 | 3 | SYT17/DTNBP1/PRKN  |
| Biological Process | GO:0014059 | regulation of dopamine secretion                           | 3/2279 | 35/18866 | 0.8120768 | 0.8782695 | 0.7946894 | 3 | SYT17/DTNBP1/PRKN  |
| Biological Process | GO:0021522 | spinal cord motor neuron differentiation                   | 3/2279 | 35/18866 | 0.8120768 | 0.8782695 | 0.7946894 | 3 | PHOX2A/SUFU/LMO4   |
| Biological Process | GO:0032509 | endosome transport via multivesicular body sorting pathway | 3/2279 | 35/18866 | 0.8120768 | 0.8782695 | 0.7946894 | 3 | LYST/SORT1/MVB12A  |
| Biological Process | GO:0042407 | cristae formation                                          | 3/2279 | 35/18866 | 0.8120768 | 0.8782695 | 0.7946894 | 3 | SPG7/IMMT/ATP5PD   |
| Biological Process | GO:0044743 | protein transmembrane import into intracellular organelle  | 3/2279 | 35/18866 | 0.8120768 | 0.8782695 | 0.7946894 | 3 | PAM16/PEX26/TIMM44 |
| Biological Process | GO:0046471 | phosphatidylglycerol metabolic process                     | 3/2279 | 35/18866 | 0.8120768 | 0.8782695 | 0.7946894 | 3 | LPCAT1/PGS1/CDS2   |
| Biological Process | GO:0060338 | regulation of type I interferon-mediated signaling pathway | 3/2279 | 35/18866 | 0.8120768 | 0.8782695 | 0.7946894 | 3 | PTPN6/NLRC5/FADD   |

|                    |            |                                                                 |        |          |           |           |           |   |                     |
|--------------------|------------|-----------------------------------------------------------------|--------|----------|-----------|-----------|-----------|---|---------------------|
| Biological Process | GO:0070670 | response to interleukin-4                                       | 3/2279 | 35/18866 | 0.8120768 | 0.8782695 | 0.7946894 | 3 | RUFY4/ADAMTS13/MCM2 |
| Biological Process | GO:1904031 | positive regulation of cyclin-dependent protein kinase activity | 3/2279 | 35/18866 | 0.8120768 | 0.8782695 | 0.7946894 | 3 | PDGFB/CCNY/CCNYL1   |
| Biological Process | GO:1905606 | regulation of presynapse assembly                               | 3/2279 | 35/18866 | 0.8120768 | 0.8782695 | 0.7946894 | 3 | APP/NRXN1/EIF4G1    |
| Biological Process | GO:0001574 | ganglioside biosynthetic process                                | 1/2279 | 13/18866 | 0.8125449 | 0.8782695 | 0.7946894 | 1 | ST8SIA6             |
| Biological Process | GO:0002836 | positive regulation of response to tumor cell                   | 1/2279 | 13/18866 | 0.8125449 | 0.8782695 | 0.7946894 | 1 | CD226               |
| Biological Process | GO:0002839 | positive regulation of immune response to tumor cell            | 1/2279 | 13/18866 | 0.8125449 | 0.8782695 | 0.7946894 | 1 | CD226               |
| Biological Process | GO:0003084 | positive regulation of systemic arterial blood pressure         | 1/2279 | 13/18866 | 0.8125449 | 0.8782695 | 0.7946894 | 1 | HSD11B2             |
| Biological Process | GO:0005513 | detection of calcium ion                                        | 1/2279 | 13/18866 | 0.8125449 | 0.8782695 | 0.7946894 | 1 | CASQ2               |
| Biological Process | GO:0006264 | mitochondrial DNA replication                                   | 1/2279 | 13/18866 | 0.8125449 | 0.8782695 | 0.7946894 | 1 | RRM2B               |

|                    |            |                                                                                  |        |          |           |           |           |   |         |
|--------------------|------------|----------------------------------------------------------------------------------|--------|----------|-----------|-----------|-----------|---|---------|
| Biological Process | GO:0006596 | polyamine biosynthetic process                                                   | 1/2279 | 13/18866 | 0.8125449 | 0.8782695 | 0.7946894 | 1 | ODC1    |
| Biological Process | GO:0006703 | estrogen biosynthetic process                                                    | 1/2279 | 13/18866 | 0.8125449 | 0.8782695 | 0.7946894 | 1 | HSD17B2 |
| Biological Process | GO:0006995 | cellular response to nitrogen starvation                                         | 1/2279 | 13/18866 | 0.8125449 | 0.8782695 | 0.7946894 | 1 | NPRL2   |
| Biological Process | GO:0007494 | midgut development                                                               | 1/2279 | 13/18866 | 0.8125449 | 0.8782695 | 0.7946894 | 1 | ALDH1A2 |
| Biological Process | GO:0009886 | post-embryonic animal morphogenesis                                              | 1/2279 | 13/18866 | 0.8125449 | 0.8782695 | 0.7946894 | 1 | CRB1    |
| Biological Process | GO:0010459 | negative regulation of heart rate                                                | 1/2279 | 13/18866 | 0.8125449 | 0.8782695 | 0.7946894 | 1 | SPTBN4  |
| Biological Process | GO:0010642 | negative regulation of platelet-derived growth factor receptor signaling pathway | 1/2279 | 13/18866 | 0.8125449 | 0.8782695 | 0.7946894 | 1 | PTPRJ   |
| Biological Process | GO:0010870 | positive regulation of receptor biosynthetic process                             | 1/2279 | 13/18866 | 0.8125449 | 0.8782695 | 0.7946894 | 1 | HDAC1   |
| Biological Process | GO:0014842 | regulation of skeletal muscle satellite cell proliferation                       | 1/2279 | 13/18866 | 0.8125449 | 0.8782695 | 0.7946894 | 1 | ANGPT1  |

|                    |            |                                                  |        |          |           |           |           |   |        |
|--------------------|------------|--------------------------------------------------|--------|----------|-----------|-----------|-----------|---|--------|
| Biological Process | GO:0016264 | gap junction assembly                            | 1/2279 | 13/18866 | 0.8125449 | 0.8782695 | 0.7946894 | 1 | GJA5   |
| Biological Process | GO:0016558 | protein import into peroxisome matrix            | 1/2279 | 13/18866 | 0.8125449 | 0.8782695 | 0.7946894 | 1 | PEX26  |
| Biological Process | GO:0021520 | spinal cord motor neuron cell fate specification | 1/2279 | 13/18866 | 0.8125449 | 0.8782695 | 0.7946894 | 1 | SUFU   |
| Biological Process | GO:0021554 | optic nerve development                          | 1/2279 | 13/18866 | 0.8125449 | 0.8782695 | 0.7946894 | 1 | PAX2   |
| Biological Process | GO:0030002 | cellular anion homeostasis                       | 1/2279 | 13/18866 | 0.8125449 | 0.8782695 | 0.7946894 | 1 | ABCC2  |
| Biological Process | GO:0030205 | dermatan sulfate metabolic process               | 1/2279 | 13/18866 | 0.8125449 | 0.8782695 | 0.7946894 | 1 | DSE    |
| Biological Process | GO:0030309 | poly-N-acetyllactosamine metabolic process       | 1/2279 | 13/18866 | 0.8125449 | 0.8782695 | 0.7946894 | 1 | B3GNT2 |
| Biological Process | GO:0030320 | cellular monovalent inorganic anion homeostasis  | 1/2279 | 13/18866 | 0.8125449 | 0.8782695 | 0.7946894 | 1 | ABCC2  |
| Biological Process | GO:0031053 | primary miRNA processing                         | 1/2279 | 13/18866 | 0.8125449 | 0.8782695 | 0.7946894 | 1 | SMAD3  |

|                    |            |                                                                                    |        |          |           |           |           |   |          |
|--------------------|------------|------------------------------------------------------------------------------------|--------|----------|-----------|-----------|-----------|---|----------|
| Biological Process | GO:0031115 | negative regulation of microtubule polymerization                                  | 1/2279 | 13/18866 | 0.8125449 | 0.8782695 | 0.7946894 | 1 | TBCD     |
| Biological Process | GO:0031274 | positive regulation of pseudopodium assembly                                       | 1/2279 | 13/18866 | 0.8125449 | 0.8782695 | 0.7946894 | 1 | CDC42EP1 |
| Biological Process | GO:0031650 | regulation of heat generation                                                      | 1/2279 | 13/18866 | 0.8125449 | 0.8782695 | 0.7946894 | 1 | TNF      |
| Biological Process | GO:0032230 | positive regulation of synaptic transmission, GABAergic                            | 1/2279 | 13/18866 | 0.8125449 | 0.8782695 | 0.7946894 | 1 | PRKCE    |
| Biological Process | GO:0032429 | regulation of phospholipase A2 activity                                            | 1/2279 | 13/18866 | 0.8125449 | 0.8782695 | 0.7946894 | 1 | AGTR1    |
| Biological Process | GO:0032725 | positive regulation of granulocyte macrophage colony-stimulating factor production | 1/2279 | 13/18866 | 0.8125449 | 0.8782695 | 0.7946894 | 1 | TLR9     |
| Biological Process | GO:0032823 | regulation of natural killer cell differentiation                                  | 1/2279 | 13/18866 | 0.8125449 | 0.8782695 | 0.7946894 | 1 | PGLYRP1  |
| Biological Process | GO:0033127 | regulation of histone phosphorylation                                              | 1/2279 | 13/18866 | 0.8125449 | 0.8782695 | 0.7946894 | 1 | RPS6KA4  |
| Biological Process | GO:0033145 | positive regulation of intracellular steroid hormone receptor signaling pathway    | 1/2279 | 13/18866 | 0.8125449 | 0.8782695 | 0.7946894 | 1 | KMT2D    |

|                    |            |                                                                                 |        |          |           |           |           |   |        |
|--------------------|------------|---------------------------------------------------------------------------------|--------|----------|-----------|-----------|-----------|---|--------|
| Biological Process | GO:0033605 | positive regulation of catecholamine secretion                                  | 1/2279 | 13/18866 | 0.8125449 | 0.8782695 | 0.7946894 | 1 | GRK2   |
| Biological Process | GO:0034244 | negative regulation of transcription elongation from RNA polymerase II promoter | 1/2279 | 13/18866 | 0.8125449 | 0.8782695 | 0.7946894 | 1 | RECQL5 |
| Biological Process | GO:0034309 | primary alcohol biosynthetic process                                            | 1/2279 | 13/18866 | 0.8125449 | 0.8782695 | 0.7946894 | 1 | DGKQ   |
| Biological Process | GO:0034370 | triglyceride-rich lipoprotein particle remodeling                               | 1/2279 | 13/18866 | 0.8125449 | 0.8782695 | 0.7946894 | 1 | LIPC   |
| Biological Process | GO:0035641 | locomotory exploration behavior                                                 | 1/2279 | 13/18866 | 0.8125449 | 0.8782695 | 0.7946894 | 1 | PRKCE  |
| Biological Process | GO:0036109 | alpha-linolenic acid metabolic process                                          | 1/2279 | 13/18866 | 0.8125449 | 0.8782695 | 0.7946894 | 1 | ACSL1  |
| Biological Process | GO:0043201 | response to leucine                                                             | 1/2279 | 13/18866 | 0.8125449 | 0.8782695 | 0.7946894 | 1 | RPTOR  |
| Biological Process | GO:0043248 | proteasome assembly                                                             | 1/2279 | 13/18866 | 0.8125449 | 0.8782695 | 0.7946894 | 1 | PSMD13 |
| Biological Process | GO:0043562 | cellular response to nitrogen levels                                            | 1/2279 | 13/18866 | 0.8125449 | 0.8782695 | 0.7946894 | 1 | NPRL2  |

|                    |            |                                                                            |        |          |           |           |           |   |          |
|--------------------|------------|----------------------------------------------------------------------------|--------|----------|-----------|-----------|-----------|---|----------|
| Biological Process | GO:0045602 | negative regulation of endothelial cell differentiation                    | 1/2279 | 13/18866 | 0.8125449 | 0.8782695 | 0.7946894 | 1 | NOTCH4   |
| Biological Process | GO:0045741 | positive regulation of epidermal growth factor-activated receptor activity | 1/2279 | 13/18866 | 0.8125449 | 0.8782695 | 0.7946894 | 1 | TGFA     |
| Biological Process | GO:0046040 | IMP metabolic process                                                      | 1/2279 | 13/18866 | 0.8125449 | 0.8782695 | 0.7946894 | 1 | AMPD3    |
| Biological Process | GO:0050910 | detection of mechanical stimulus involved in sensory perception of sound   | 1/2279 | 13/18866 | 0.8125449 | 0.8782695 | 0.7946894 | 1 | TMC1     |
| Biological Process | GO:0051451 | myoblast migration                                                         | 1/2279 | 13/18866 | 0.8125449 | 0.8782695 | 0.7946894 | 1 | ITGB1BP1 |
| Biological Process | GO:0051988 | regulation of attachment of spindle microtubules to kinetochore            | 1/2279 | 13/18866 | 0.8125449 | 0.8782695 | 0.7946894 | 1 | SPAG5    |
| Biological Process | GO:0061469 | regulation of type B pancreatic cell proliferation                         | 1/2279 | 13/18866 | 0.8125449 | 0.8782695 | 0.7946894 | 1 | SGPP2    |
| Biological Process | GO:0070071 | proton-transporting two-sector ATPase complex assembly                     | 1/2279 | 13/18866 | 0.8125449 | 0.8782695 | 0.7946894 | 1 | TM9SF4   |
| Biological Process | GO:0070839 | divalent metal ion export                                                  | 1/2279 | 13/18866 | 0.8125449 | 0.8782695 | 0.7946894 | 1 | SLC11A1  |

|                    |            |                                                                        |        |          |           |           |           |   |        |
|--------------------|------------|------------------------------------------------------------------------|--------|----------|-----------|-----------|-----------|---|--------|
| Biological Process | GO:0071696 | ectodermal placode development                                         | 1/2279 | 13/18866 | 0.8125449 | 0.8782695 | 0.7946894 | 1 | HDAC1  |
| Biological Process | GO:0097499 | protein localization to non-motile cilium                              | 1/2279 | 13/18866 | 0.8125449 | 0.8782695 | 0.7946894 | 1 | TTC21B |
| Biological Process | GO:0097531 | mast cell migration                                                    | 1/2279 | 13/18866 | 0.8125449 | 0.8782695 | 0.7946894 | 1 | PIK3CD |
| Biological Process | GO:0098903 | regulation of membrane repolarization during action potential          | 1/2279 | 13/18866 | 0.8125449 | 0.8782695 | 0.7946894 | 1 | NOS1AP |
| Biological Process | GO:0099150 | regulation of postsynaptic specialization assembly                     | 1/2279 | 13/18866 | 0.8125449 | 0.8782695 | 0.7946894 | 1 | NRXN1  |
| Biological Process | GO:0150052 | regulation of postsynapse assembly                                     | 1/2279 | 13/18866 | 0.8125449 | 0.8782695 | 0.7946894 | 1 | NRXN1  |
| Biological Process | GO:1900102 | negative regulation of endoplasmic reticulum unfolded protein response | 1/2279 | 13/18866 | 0.8125449 | 0.8782695 | 0.7946894 | 1 | NCK2   |
| Biological Process | GO:1901387 | positive regulation of voltage-gated calcium channel activity          | 1/2279 | 13/18866 | 0.8125449 | 0.8782695 | 0.7946894 | 1 | FGF14  |
| Biological Process | GO:1902902 | negative regulation of autophagosome assembly                          | 1/2279 | 13/18866 | 0.8125449 | 0.8782695 | 0.7946894 | 1 | FEZ2   |



|                    |            |                                                                                 |         |           |           |           |           |    |                                                                               |
|--------------------|------------|---------------------------------------------------------------------------------|---------|-----------|-----------|-----------|-----------|----|-------------------------------------------------------------------------------|
| Biological Process | GO:1903025 | regulation of RNA polymerase II regulatory region sequence-specific DNA binding | 1/2279  | 13/18866  | 0.8125449 | 0.8782695 | 0.7946894 | 1  | LIF                                                                           |
| Biological Process | GO:1905651 | regulation of artery morphogenesis                                              | 1/2279  | 13/18866  | 0.8125449 | 0.8782695 | 0.7946894 | 1  | NOTCH1                                                                        |
| Biological Process | GO:1990403 | embryonic brain development                                                     | 1/2279  | 13/18866  | 0.8125449 | 0.8782695 | 0.7946894 | 1  | IFT140                                                                        |
| Biological Process | GO:2000009 | negative regulation of protein localization to cell surface                     | 1/2279  | 13/18866  | 0.8125449 | 0.8782695 | 0.7946894 | 1  | ASTN2                                                                         |
| Biological Process | GO:2000344 | positive regulation of acrosome reaction                                        | 1/2279  | 13/18866  | 0.8125449 | 0.8782695 | 0.7946894 | 1  | PLCB1                                                                         |
| Biological Process | GO:2001198 | regulation of dendritic cell differentiation                                    | 1/2279  | 13/18866  | 0.8125449 | 0.8782695 | 0.7946894 | 1  | CEBPB                                                                         |
| Biological Process | GO:0060675 | ureteric bud morphogenesis                                                      | 6/2279  | 65/18866  | 0.8128582 | 0.8784083 | 0.794815  | 6  | TACSTD2/ILK/WNT11/PAX2/BCL2/HOXB7                                             |
| Biological Process | GO:0090307 | mitotic spindle assembly                                                        | 6/2279  | 65/18866  | 0.8128582 | 0.8784083 | 0.794815  | 6  | ARHGEF10/RCC1/STAG1/MSTO1/CHEK2/ABRAXAS1                                      |
| Biological Process | GO:0006690 | icosanoid metabolic process                                                     | 12/2279 | 122/18866 | 0.8150501 | 0.8806768 | 0.7968676 | 12 | MGLL/ABCC1/GGT1/ABHD16A/TNFRSF1A/CYP4F3/MGST2/EPHX1/DPEP2/LYPLA2/ZADH2/PRXL2B |

|                    |            |                                                                         |         |           |           |           |           |    |                                                                     |
|--------------------|------------|-------------------------------------------------------------------------|---------|-----------|-----------|-----------|-----------|----|---------------------------------------------------------------------|
| Biological Process | GO:0034308 | primary alcohol metabolic process                                       | 9/2279  | 94/18866  | 0.81588   | 0.881373  | 0.7974976 | 9  | PNPLA2/DHRS9/ALDH2/ACSS1/RDH10/SULT1A2/DGKQ/ACSS2/ALDH1A2           |
| Biological Process | GO:0060993 | kidney morphogenesis                                                    | 9/2279  | 94/18866  | 0.81588   | 0.881373  | 0.7974976 | 9  | TACSTD2/ILK/WNT11/PAX2/WWTR1/BCL2/PDGFRB/LIF/HOXB7                  |
| Biological Process | GO:0042274 | ribosomal small subunit biogenesis                                      | 7/2279  | 75/18866  | 0.816561  | 0.881808  | 0.7978912 | 7  | RCL1/WDR46/NOB1/NOP14/ERCC2/RIOK1/UTP4                              |
| Biological Process | GO:0061844 | antimicrobial humoral immune response mediated by antimicrobial peptide | 7/2279  | 75/18866  | 0.816561  | 0.881808  | 0.7978912 | 7  | DEFA4/ELANE/RNASE3/DEFB1/PGLYRP1/LTF/PGLYRP4                        |
| Biological Process | GO:0072088 | nephron epithelium morphogenesis                                        | 7/2279  | 75/18866  | 0.816561  | 0.881808  | 0.7978912 | 7  | TACSTD2/ILK/WNT11/PAX2/BCL2/LIF/HOXB7                               |
| Biological Process | GO:0048024 | regulation of mRNA splicing, via spliceosome                            | 11/2279 | 113/18866 | 0.8177866 | 0.8829307 | 0.798907  | 11 | RBM19/SRPK2/PCBP4/SF1/DAZAP1/SFSWAP/CELF2/CELF1/RBFOX3/NSRP1/RBM15B |
| Biological Process | GO:0070268 | cornification                                                           | 11/2279 | 113/18866 | 0.8177866 | 0.8829307 | 0.798907  | 11 | CSTA/TGM5/KRT17/JUP/PKP1/PCSK6/PERP/KRT23/KAZN/KRT7/PPL             |
| Biological Process | GO:0035418 | protein localization to synapse                                         | 8/2279  | 85/18866  | 0.8208154 | 0.8859991 | 0.8016834 | 8  | PRKCZ/BAIAP2/ZDHHC2/CNIH2/NRXN1/KIF5C/NRXN2/MAP1A                   |
| Biological Process | GO:0034508 | centromere complex assembly                                             | 5/2279  | 56/18866  | 0.822513  | 0.8859991 | 0.8016834 | 5  | MIS12/RSF1/RB1/CENPM/RUVBL1                                         |

|                    |            |                                                       |        |          |           |           |           |   |              |
|--------------------|------------|-------------------------------------------------------|--------|----------|-----------|-----------|-----------|---|--------------|
| Biological Process | GO:0002053 | positive regulation of mesenchymal cell proliferation | 2/2279 | 25/18866 | 0.8227348 | 0.8859991 | 0.8016834 | 2 | TGFBR2/FGFR1 |
| Biological Process | GO:0006851 | mitochondrial calcium ion transmembrane transport     | 2/2279 | 25/18866 | 0.8227348 | 0.8859991 | 0.8016834 | 2 | SPG7/PHB     |
| Biological Process | GO:0007530 | sex determination                                     | 2/2279 | 25/18866 | 0.8227348 | 0.8859991 | 0.8016834 | 2 | SF1/INSRR    |
| Biological Process | GO:0010447 | response to acidic pH                                 | 2/2279 | 25/18866 | 0.8227348 | 0.8859991 | 0.8016834 | 2 | GPR4/SST     |
| Biological Process | GO:0014829 | vascular associated smooth muscle contraction         | 2/2279 | 25/18866 | 0.8227348 | 0.8859991 | 0.8016834 | 2 | SLC8A1/P2RX1 |
| Biological Process | GO:0032104 | regulation of response to extracellular stimulus      | 2/2279 | 25/18866 | 0.8227348 | 0.8859991 | 0.8016834 | 2 | GHRL/NPY     |
| Biological Process | GO:0032107 | regulation of response to nutrient levels             | 2/2279 | 25/18866 | 0.8227348 | 0.8859991 | 0.8016834 | 2 | GHRL/NPY     |
| Biological Process | GO:0039529 | RIG-I signaling pathway                               | 2/2279 | 25/18866 | 0.8227348 | 0.8859991 | 0.8016834 | 2 | PHB/SEC14L1  |
| Biological Process | GO:0045992 | negative regulation of embryonic development          | 2/2279 | 25/18866 | 0.8227348 | 0.8859991 | 0.8016834 | 2 | SUFU/COL5A1  |

|                    |            |                                                                     |         |           |           |           |           |    |                                                                                                                                                                                                                                                  |
|--------------------|------------|---------------------------------------------------------------------|---------|-----------|-----------|-----------|-----------|----|--------------------------------------------------------------------------------------------------------------------------------------------------------------------------------------------------------------------------------------------------|
| Biological Process | GO:0046039 | GTP metabolic process                                               | 2/2279  | 25/18866  | 0.8227348 | 0.8859991 | 0.8016834 | 2  | AMPD3/IMPDH1                                                                                                                                                                                                                                     |
| Biological Process | GO:0060259 | regulation of feeding behavior                                      | 2/2279  | 25/18866  | 0.8227348 | 0.8859991 | 0.8016834 | 2  | GHRL/TTC21B                                                                                                                                                                                                                                      |
| Biological Process | GO:0060571 | morphogenesis of an epithelial fold                                 | 2/2279  | 25/18866  | 0.8227348 | 0.8859991 | 0.8016834 | 2  | RDH10/NODAL                                                                                                                                                                                                                                      |
| Biological Process | GO:0097164 | ammonium ion metabolic process                                      | 2/2279  | 25/18866  | 0.8227348 | 0.8859991 | 0.8016834 | 2  | DDC/HNMT                                                                                                                                                                                                                                         |
| Biological Process | GO:2000679 | positive regulation of transcription regulatory region DNA binding  | 2/2279  | 25/18866  | 0.8227348 | 0.8859991 | 0.8016834 | 2  | TGFB1/RB1                                                                                                                                                                                                                                        |
| Biological Process | GO:0022412 | cellular process involved in reproduction in multicellular organism | 40/2279 | 375/18866 | 0.8227599 | 0.8859991 | 0.8016834 | 40 | PIWIL4/CD9/ACRBP/HEXB/MOV10L1/BRCA2/ARRB1/FOLR3/SPAG6/ZBTB16/MEIOB/CDYL/SMARCA2/ZMIZ1/FANCA/KMT2D/RARA/DEFB1/JAM3/KDM1B/IQCG/BMPR1B/ETV6/PPP2R1A/ARRB2/CELF1/CCNA1/BCL2/DMC1/SLIT3/ARMC2/MORC1/NPPC/FSCN3/ERCC1/BCL2L1/FBXW11/INHBA/TTL1/MFSD14A |
| Biological Process | GO:0000959 | mitochondrial RNA metabolic process                                 | 4/2279  | 46/18866  | 0.8228666 | 0.8859991 | 0.8016834 | 4  | EARS2/TBRG4/PRKAA1/GRSF1                                                                                                                                                                                                                         |
| Biological Process | GO:0005978 | glycogen biosynthetic process                                       | 4/2279  | 46/18866  | 0.8228666 | 0.8859991 | 0.8016834 | 4  | DYRK2/PPP1CB/ESRRB/PER2                                                                                                                                                                                                                          |
| Biological Process | GO:0007019 | microtubule depolymerization                                        | 4/2279  | 46/18866  | 0.8228666 | 0.8859991 | 0.8016834 | 4  | NAV3/MAP1A/ARHGEF2/SPEF1                                                                                                                                                                                                                         |

|                    |            |                                                          |         |           |           |           |           |    |                                                                                     |
|--------------------|------------|----------------------------------------------------------|---------|-----------|-----------|-----------|-----------|----|-------------------------------------------------------------------------------------|
| Biological Process | GO:0009250 | glucan biosynthetic process                              | 4/2279  | 46/18866  | 0.8228666 | 0.8859991 | 0.8016834 | 4  | DYRK2/PPP1CB/ESRRB/PER2                                                             |
| Biological Process | GO:0014014 | negative regulation of gliogenesis                       | 4/2279  | 46/18866  | 0.8228666 | 0.8859991 | 0.8016834 | 4  | SKI/NF1/NOTCH1/CERS2                                                                |
| Biological Process | GO:0017144 | drug metabolic process                                   | 4/2279  | 46/18866  | 0.8228666 | 0.8859991 | 0.8016834 | 4  | NR1I2/ABCC2/TPMT/AOX1                                                               |
| Biological Process | GO:0051646 | mitochondrion localization                               | 4/2279  | 46/18866  | 0.8228666 | 0.8859991 | 0.8016834 | 4  | MSTO1/KIF1B/DNM1L/MARK2                                                             |
| Biological Process | GO:0044766 | multi-organism transport                                 | 6/2279  | 66/18866  | 0.8242035 | 0.8871369 | 0.802713  | 6  | RAE1/NUP93/SEC13/TPCN2/EPS15/MVB12A                                                 |
| Biological Process | GO:0072171 | mesonephric tubule morphogenesis                         | 6/2279  | 66/18866  | 0.8242035 | 0.8871369 | 0.802713  | 6  | TACSTD2/ILK/WNT11/PAX2/BCL2/HOXB7                                                   |
| Biological Process | GO:1902579 | multi-organism localization                              | 6/2279  | 66/18866  | 0.8242035 | 0.8871369 | 0.802713  | 6  | RAE1/NUP93/SEC13/TPCN2/EPS15/MVB12A                                                 |
| Biological Process | GO:0007292 | female gamete generation                                 | 14/2279 | 142/18866 | 0.826872  | 0.8892085 | 0.8045874 | 14 | HEXB/BRCA2/MEIOB/TNFAIP6/ZMIZ1/KMT2D/BMPR1B/ETV6/PPP2R1A/BCL2/DMC1/NPPC/ERCC1/INHBA |
| Biological Process | GO:0000381 | regulation of alternative mRNA splicing, via spliceosome | 7/2279  | 76/18866  | 0.8270486 | 0.8892085 | 0.8045874 | 7  | RBM19/SF1/CELF2/CELF1/RBFOX3/NSRP1/RBM15B                                           |

|                    |            |                                                      |         |           |           |           |           |    |                                                           |
|--------------------|------------|------------------------------------------------------|---------|-----------|-----------|-----------|-----------|----|-----------------------------------------------------------|
| Biological Process | GO:1903524 | positive regulation of blood circulation             | 7/2279  | 76/18866  | 0.8270486 | 0.8892085 | 0.8045874 | 7  | PDE4D/GJA5/NOS1AP/HRH1/GHRL/KCNQ1/F2R                     |
| Biological Process | GO:0001569 | branching involved in blood vessel morphogenesis     | 3/2279  | 36/18866  | 0.8270641 | 0.8892085 | 0.8045874 | 3  | TGFBR2/ENG/NOTCH4                                         |
| Biological Process | GO:0002755 | MyD88-dependent toll-like receptor signaling pathway | 3/2279  | 36/18866  | 0.8270641 | 0.8892085 | 0.8045874 | 3  | TLR9/TNIP1/IRAK2                                          |
| Biological Process | GO:0016180 | snRNA processing                                     | 3/2279  | 36/18866  | 0.8270641 | 0.8892085 | 0.8045874 | 3  | EXOSC2/TOE1/TUT1                                          |
| Biological Process | GO:0031128 | developmental induction                              | 3/2279  | 36/18866  | 0.8270641 | 0.8892085 | 0.8045874 | 3  | HIPK2/WNT11/FGFR1                                         |
| Biological Process | GO:0033280 | response to vitamin D                                | 3/2279  | 36/18866  | 0.8270641 | 0.8892085 | 0.8045874 | 3  | VDR/ALPL/AQP3                                             |
| Biological Process | GO:0051955 | regulation of amino acid transport                   | 3/2279  | 36/18866  | 0.8270641 | 0.8892085 | 0.8045874 | 3  | SLC43A2/PER2/SLC43A1                                      |
| Biological Process | GO:0099174 | regulation of presynapse organization                | 3/2279  | 36/18866  | 0.8270641 | 0.8892085 | 0.8045874 | 3  | APP/NRXN1/EIF4G1                                          |
| Biological Process | GO:0030301 | cholesterol transport                                | 10/2279 | 105/18866 | 0.830047  | 0.8922137 | 0.8073066 | 10 | OSBPL5/LIPC/ABCG1/PLTP/MIR27A/OSBPL6/CLU/NR1H2/ABCA1/NPC1 |

|                    |            |                                                                     |         |           |           |           |           |    |                                                                                                                      |
|--------------------|------------|---------------------------------------------------------------------|---------|-----------|-----------|-----------|-----------|----|----------------------------------------------------------------------------------------------------------------------|
| Biological Process | GO:0044070 | regulation of anion transport                                       | 10/2279 | 105/18866 | 0.830047  | 0.8922137 | 0.8073066 | 10 | MAP2K6/ATP8A1/THBS1/RIPK1/FGFR1/SLC43A2/PER2/SLC43A1/CEBPB/PDZK1                                                     |
| Biological Process | GO:0006112 | energy reserve metabolic process                                    | 8/2279  | 86/18866  | 0.8305635 | 0.8925426 | 0.8076042 | 8  | PRKAG2/DYRK2/PPP1CB/ESRRB/PER2/GFPT2/PCDH12/RUBCNL                                                                   |
| Biological Process | GO:0021515 | cell differentiation in spinal cord                                 | 5/2279  | 57/18866  | 0.8342087 | 0.8925426 | 0.8076042 | 5  | PHOX2A/SUFU/PAX7/NOTCH1/LMO4                                                                                         |
| Biological Process | GO:0050432 | catecholamine secretion                                             | 5/2279  | 57/18866  | 0.8342087 | 0.8925426 | 0.8076042 | 5  | NISCH/SYT17/DTNBP1/GRK2/PRKN                                                                                         |
| Biological Process | GO:0010565 | regulation of cellular ketone metabolic process                     | 19/2279 | 189/18866 | 0.8342144 | 0.8925426 | 0.8076042 | 19 | PRKAG2/PPARG/NCOR2/MFSD2A/ODC1/COMT/RDH10/DGKQ/NR1H2/SLC7A7/ACACB/PSMF1/PSMB7/PRKCE/SREBF1/WDTC1/CPT1A/PSMD13/ACADVL |
| Biological Process | GO:0048663 | neuron fate commitment                                              | 6/2279  | 67/18866  | 0.8349947 | 0.8925426 | 0.8076042 | 6  | SUFU/DLL1/RBPJ/PAX7/FEV/NOTCH1                                                                                       |
| Biological Process | GO:1900015 | regulation of cytokine production involved in inflammatory response | 6/2279  | 67/18866  | 0.8349947 | 0.8925426 | 0.8076042 | 6  | MIR140/MEFV/TNF/NOD2/PER1/PLD3                                                                                       |
| Biological Process | GO:0001886 | endothelial cell morphogenesis                                      | 1/2279  | 14/18866  | 0.8352049 | 0.8925426 | 0.8076042 | 1  | NOTCH4                                                                                                               |
| Biological Process | GO:0006241 | CTP biosynthetic process                                            | 1/2279  | 14/18866  | 0.8352049 | 0.8925426 | 0.8076042 | 1  | UCK2                                                                                                                 |

|                    |            |                                                                        |        |          |           |           |           |   |          |
|--------------------|------------|------------------------------------------------------------------------|--------|----------|-----------|-----------|-----------|---|----------|
| Biological Process | GO:0007512 | adult heart development                                                | 1/2279 | 14/18866 | 0.8352049 | 0.8925426 | 0.8076042 | 1 | MEF2D    |
| Biological Process | GO:0010248 | establishment or maintenance of transmembrane electrochemical gradient | 1/2279 | 14/18866 | 0.8352049 | 0.8925426 | 0.8076042 | 1 | FXYD2    |
| Biological Process | GO:0010838 | positive regulation of keratinocyte proliferation                      | 1/2279 | 14/18866 | 0.8352049 | 0.8925426 | 0.8076042 | 1 | CDH3     |
| Biological Process | GO:0014841 | skeletal muscle satellite cell proliferation                           | 1/2279 | 14/18866 | 0.8352049 | 0.8925426 | 0.8076042 | 1 | ANGPT1   |
| Biological Process | GO:0014857 | regulation of skeletal muscle cell proliferation                       | 1/2279 | 14/18866 | 0.8352049 | 0.8925426 | 0.8076042 | 1 | ANGPT1   |
| Biological Process | GO:0030007 | cellular potassium ion homeostasis                                     | 1/2279 | 14/18866 | 0.8352049 | 0.8925426 | 0.8076042 | 1 | KCTD7    |
| Biological Process | GO:0030836 | positive regulation of actin filament depolymerization                 | 1/2279 | 14/18866 | 0.8352049 | 0.8925426 | 0.8076042 | 1 | WDR1     |
| Biological Process | GO:0031272 | regulation of pseudopodium assembly                                    | 1/2279 | 14/18866 | 0.8352049 | 0.8925426 | 0.8076042 | 1 | CDC42EP1 |
| Biological Process | GO:0031282 | regulation of guanylate cyclase activity                               | 1/2279 | 14/18866 | 0.8352049 | 0.8925426 | 0.8076042 | 1 | RCVRN    |



|                    |            |                                                                    |        |          |           |           |           |   |        |
|--------------------|------------|--------------------------------------------------------------------|--------|----------|-----------|-----------|-----------|---|--------|
| Biological Process | GO:0032310 | prostaglandin secretion                                            | 1/2279 | 14/18866 | 0.8352049 | 0.8925426 | 0.8076042 | 1 | MAP2K6 |
| Biological Process | GO:0032488 | Cdc42 protein signal transduction                                  | 1/2279 | 14/18866 | 0.8352049 | 0.8925426 | 0.8076042 | 1 | ABCA1  |
| Biological Process | GO:0032688 | negative regulation of interferon-beta production                  | 1/2279 | 14/18866 | 0.8352049 | 0.8925426 | 0.8076042 | 1 | TRAIP  |
| Biological Process | GO:0032802 | low-density lipoprotein particle receptor catabolic process        | 1/2279 | 14/18866 | 0.8352049 | 0.8925426 | 0.8076042 | 1 | AP2A1  |
| Biological Process | GO:0035589 | G protein-coupled purinergic nucleotide receptor signaling pathway | 1/2279 | 14/18866 | 0.8352049 | 0.8925426 | 0.8076042 | 1 | P2RY6  |
| Biological Process | GO:0035810 | positive regulation of urine volume                                | 1/2279 | 14/18866 | 0.8352049 | 0.8925426 | 0.8076042 | 1 | GNAI2  |
| Biological Process | GO:0035815 | positive regulation of renal sodium excretion                      | 1/2279 | 14/18866 | 0.8352049 | 0.8925426 | 0.8076042 | 1 | GNAI2  |
| Biological Process | GO:0043558 | regulation of translational initiation in response to stress       | 1/2279 | 14/18866 | 0.8352049 | 0.8925426 | 0.8076042 | 1 | NCK2   |
| Biological Process | GO:0044804 | autophagy of nucleus                                               | 1/2279 | 14/18866 | 0.8352049 | 0.8925426 | 0.8076042 | 1 | WIPI2  |

|                    |            |                                                                                |        |          |           |           |           |   |        |
|--------------------|------------|--------------------------------------------------------------------------------|--------|----------|-----------|-----------|-----------|---|--------|
| Biological Process | GO:0045472 | response to ether                                                              | 1/2279 | 14/18866 | 0.8352049 | 0.8925426 | 0.8076042 | 1 | LARP1  |
| Biological Process | GO:0045836 | positive regulation of meiotic nuclear division                                | 1/2279 | 14/18866 | 0.8352049 | 0.8925426 | 0.8076042 | 1 | PLCB1  |
| Biological Process | GO:0046036 | CTP metabolic process                                                          | 1/2279 | 14/18866 | 0.8352049 | 0.8925426 | 0.8076042 | 1 | UCK2   |
| Biological Process | GO:0046131 | pyrimidine ribonucleoside metabolic process                                    | 1/2279 | 14/18866 | 0.8352049 | 0.8925426 | 0.8076042 | 1 | CDA    |
| Biological Process | GO:0046133 | pyrimidine ribonucleoside catabolic process                                    | 1/2279 | 14/18866 | 0.8352049 | 0.8925426 | 0.8076042 | 1 | CDA    |
| Biological Process | GO:0051547 | regulation of keratinocyte migration                                           | 1/2279 | 14/18866 | 0.8352049 | 0.8925426 | 0.8076042 | 1 | IQSEC1 |
| Biological Process | GO:0060397 | growth hormone receptor signaling pathway via JAK-STAT                         | 1/2279 | 14/18866 | 0.8352049 | 0.8925426 | 0.8076042 | 1 | STAT5A |
| Biological Process | GO:0060831 | smoothened signaling pathway involved in dorsal/ventral neural tube patterning | 1/2279 | 14/18866 | 0.8352049 | 0.8925426 | 0.8076042 | 1 | SUFU   |
| Biological Process | GO:0060911 | cardiac cell fate commitment                                                   | 1/2279 | 14/18866 | 0.8352049 | 0.8925426 | 0.8076042 | 1 | RBPJ   |

|                    |            |                                                              |        |          |           |           |           |   |        |
|--------------------|------------|--------------------------------------------------------------|--------|----------|-----------|-----------|-----------|---|--------|
| Biological Process | GO:0090231 | regulation of spindle checkpoint                             | 1/2279 | 14/18866 | 0.8352049 | 0.8925426 | 0.8076042 | 1 | PCID2  |
| Biological Process | GO:0090266 | regulation of mitotic cell cycle spindle assembly checkpoint | 1/2279 | 14/18866 | 0.8352049 | 0.8925426 | 0.8076042 | 1 | PCID2  |
| Biological Process | GO:0090399 | replicative senescence                                       | 1/2279 | 14/18866 | 0.8352049 | 0.8925426 | 0.8076042 | 1 | CHEK2  |
| Biological Process | GO:0097154 | GABAergic neuron differentiation                             | 1/2279 | 14/18866 | 0.8352049 | 0.8925426 | 0.8076042 | 1 | INHBA  |
| Biological Process | GO:0099550 | trans-synaptic signaling, modulating synaptic transmission   | 1/2279 | 14/18866 | 0.8352049 | 0.8925426 | 0.8076042 | 1 | F2R    |
| Biological Process | GO:0150011 | regulation of neuron projection arborization                 | 1/2279 | 14/18866 | 0.8352049 | 0.8925426 | 0.8076042 | 1 | MFSD2A |
| Biological Process | GO:1901160 | primary amino compound metabolic process                     | 1/2279 | 14/18866 | 0.8352049 | 0.8925426 | 0.8076042 | 1 | DDC    |
| Biological Process | GO:1902188 | positive regulation of viral release from host cell          | 1/2279 | 14/18866 | 0.8352049 | 0.8925426 | 0.8076042 | 1 | PC     |
| Biological Process | GO:1903504 | regulation of mitotic spindle checkpoint                     | 1/2279 | 14/18866 | 0.8352049 | 0.8925426 | 0.8076042 | 1 | PCID2  |

|                    |            |                                                                    |        |          |           |           |           |   |                         |
|--------------------|------------|--------------------------------------------------------------------|--------|----------|-----------|-----------|-----------|---|-------------------------|
| Biological Process | GO:1903624 | regulation of DNA catabolic process                                | 1/2279 | 14/18866 | 0.8352049 | 0.8925426 | 0.8076042 | 1 | PAM16                   |
| Biological Process | GO:1903894 | regulation of IRE1-mediated unfolded protein response              | 1/2279 | 14/18866 | 0.8352049 | 0.8925426 | 0.8076042 | 1 | COP55                   |
| Biological Process | GO:1904668 | positive regulation of ubiquitin protein ligase activity           | 1/2279 | 14/18866 | 0.8352049 | 0.8925426 | 0.8076042 | 1 | FZR1                    |
| Biological Process | GO:1904814 | regulation of protein localization to chromosome, telomeric region | 1/2279 | 14/18866 | 0.8352049 | 0.8925426 | 0.8076042 | 1 | CCT6A                   |
| Biological Process | GO:1990173 | protein localization to nucleoplasm                                | 1/2279 | 14/18866 | 0.8352049 | 0.8925426 | 0.8076042 | 1 | CCT6A                   |
| Biological Process | GO:2000543 | positive regulation of gastrulation                                | 1/2279 | 14/18866 | 0.8352049 | 0.8925426 | 0.8076042 | 1 | OTX2                    |
| Biological Process | GO:0006953 | acute-phase response                                               | 4/2279 | 47/18866 | 0.8356137 | 0.8925426 | 0.8076042 | 4 | SERPINA1/TNF/IL6R/CEBPB |
| Biological Process | GO:0016073 | snRNA metabolic process                                            | 4/2279 | 47/18866 | 0.8356137 | 0.8925426 | 0.8076042 | 4 | EXOSC2/TOE1/ZCCHC8/TUT1 |
| Biological Process | GO:0030261 | chromosome condensation                                            | 4/2279 | 47/18866 | 0.8356137 | 0.8925426 | 0.8076042 | 4 | TTN/DFFB/CDC45/BANF1    |

|                    |            |                                                        |         |           |           |           |           |    |                                                                                                                                                                                  |
|--------------------|------------|--------------------------------------------------------|---------|-----------|-----------|-----------|-----------|----|----------------------------------------------------------------------------------------------------------------------------------------------------------------------------------|
| Biological Process | GO:0030574 | collagen catabolic process                             | 4/2279  | 47/18866  | 0.8356137 | 0.8925426 | 0.8076042 | 4  | PRTN3/CTSD/CTSB/VSIR                                                                                                                                                             |
| Biological Process | GO:0032369 | negative regulation of lipid transport                 | 4/2279  | 47/18866  | 0.8356137 | 0.8925426 | 0.8076042 | 4  | THBS1/MIR27A/NR1H2/ITGB3                                                                                                                                                         |
| Biological Process | GO:0042572 | retinol metabolic process                              | 4/2279  | 47/18866  | 0.8356137 | 0.8925426 | 0.8076042 | 4  | PNPLA2/DHRS9/RDH10/ALDH1A2                                                                                                                                                       |
| Biological Process | GO:0007498 | mesoderm development                                   | 13/2279 | 134/18866 | 0.8367037 | 0.8936063 | 0.8085667 | 13 | MIR145/SETD2/SMAD3/WNT11/PAX2/FGFR1/OVOL1/ITGB3/PUS7/TEAD2/SSBP3/INHBA/NODAL                                                                                                     |
| Biological Process | GO:0007548 | sex differentiation                                    | 29/2279 | 280/18866 | 0.8373284 | 0.894173  | 0.8090794 | 29 | ARID5B/BRCA2/ARRB1/EIF2B5/CSDE1/FANCA/RDH10/RARA/SF1/BMPR1B/ASB1/NCOA1/LHFPL2/ARRB2/NTRK1/HOXA9/RAD21L1/BCL2/DMC1/SLIT3/UBE3A/CEBPB/PDGFRB/ERCC1/BCL2L1/HMGCS1/TYRO3/NCOA4/INHBA |
| Biological Process | GO:0019233 | sensory perception of pain                             | 10/2279 | 106/18866 | 0.8385796 | 0.8953149 | 0.8101127 | 10 | MGLL/IL10/CCR2/COMT/SCN1A/CNR2/ARRB2/NTRK1/F2R/ACP3                                                                                                                              |
| Biological Process | GO:0002347 | response to tumor cell                                 | 2/2279  | 26/18866  | 0.8393401 | 0.8953149 | 0.8101127 | 2  | CD226/HNMT                                                                                                                                                                       |
| Biological Process | GO:0006700 | C21-steroid hormone biosynthetic process               | 2/2279  | 26/18866  | 0.8393401 | 0.8953149 | 0.8101127 | 2  | FDX1/DGKQ                                                                                                                                                                        |
| Biological Process | GO:0030810 | positive regulation of nucleotide biosynthetic process | 2/2279  | 26/18866  | 0.8393401 | 0.8953149 | 0.8101127 | 2  | RCVRN/ENO1                                                                                                                                                                       |

|                    |            |                                                                     |         |           |           |           |           |    |                                                                                   |
|--------------------|------------|---------------------------------------------------------------------|---------|-----------|-----------|-----------|-----------|----|-----------------------------------------------------------------------------------|
| Biological Process | GO:0033119 | negative regulation of RNA splicing                                 | 2/2279  | 26/18866  | 0.8393401 | 0.8953149 | 0.8101127 | 2  | PCBP4/SFSWAP                                                                      |
| Biological Process | GO:0043567 | regulation of insulin-like growth factor receptor signaling pathway | 2/2279  | 26/18866  | 0.8393401 | 0.8953149 | 0.8101127 | 2  | CDH3/MYORG                                                                        |
| Biological Process | GO:0045026 | plasma membrane fusion                                              | 2/2279  | 26/18866  | 0.8393401 | 0.8953149 | 0.8101127 | 2  | CD9/FOLR3                                                                         |
| Biological Process | GO:0046755 | viral budding                                                       | 2/2279  | 26/18866  | 0.8393401 | 0.8953149 | 0.8101127 | 2  | NEDD4/MVB12A                                                                      |
| Biological Process | GO:0051123 | RNA polymerase II preinitiation complex assembly                    | 2/2279  | 26/18866  | 0.8393401 | 0.8953149 | 0.8101127 | 2  | CREB1/ATF7IP                                                                      |
| Biological Process | GO:1900373 | positive regulation of purine nucleotide biosynthetic process       | 2/2279  | 26/18866  | 0.8393401 | 0.8953149 | 0.8101127 | 2  | RCVRN/ENO1                                                                        |
| Biological Process | GO:0007098 | centrosome cycle                                                    | 12/2279 | 125/18866 | 0.839477  | 0.8953605 | 0.8101539 | 12 | ARHGEF10/DCTN1/NDE1/BRCA2/CEP135/UVRAG/POC1A/SDCCAG8/SLC16A1/CEP72/NDEL1/CEP295NL |
| Biological Process | GO:0060291 | long-term synaptic potentiation                                     | 8/2279  | 87/18866  | 0.839892  | 0.8957025 | 0.8104634 | 8  | PRKCZ/CREB1/ZDHHC2/APP/AKAP5/NF1/SHANK2/CX3CR1                                    |
| Biological Process | GO:0007099 | centriole replication                                               | 3/2279  | 37/18866  | 0.8410148 | 0.8964974 | 0.8111827 | 3  | CEP135/CEP72/CEP295NL                                                             |

|                    |            |                                                                                 |         |           |           |           |           |    |                                                                     |
|--------------------|------------|---------------------------------------------------------------------------------|---------|-----------|-----------|-----------|-----------|----|---------------------------------------------------------------------|
| Biological Process | GO:0032941 | secretion by tissue                                                             | 3/2279  | 37/18866  | 0.8410148 | 0.8964974 | 0.8111827 | 3  | AQP1/NR1H2/PRKCE                                                    |
| Biological Process | GO:0060428 | lung epithelium development                                                     | 3/2279  | 37/18866  | 0.8410148 | 0.8964974 | 0.8111827 | 3  | CREB1/RBPJ/GRHL2                                                    |
| Biological Process | GO:0097502 | mannosylation                                                                   | 3/2279  | 37/18866  | 0.8410148 | 0.8964974 | 0.8111827 | 3  | POMT2/ALG11/B4GAT1                                                  |
| Biological Process | GO:0002220 | innate immune response<br>activating cell surface<br>receptor signaling pathway | 11/2279 | 116/18866 | 0.8427973 | 0.8982967 | 0.8128108 | 11 | CLEC4C/MUC12/FCN1/MUC20/BCL10/PSMF1/CREBBP/PSMB7/RELA/FBXW11/PSMD13 |
| Biological Process | GO:0002011 | morphogenesis of an<br>epithelial sheet                                         | 5/2279  | 58/18866  | 0.8452663 | 0.9007262 | 0.8150091 | 5  | RREB1/NOTCH1/COL5A1/ARHGAP12/MRTFA                                  |
| Biological Process | GO:0021885 | forebrain cell migration                                                        | 5/2279  | 58/18866  | 0.8452663 | 0.9007262 | 0.8150091 | 5  | RTN4/DISC1/ZMIZ1/TYRO3/NDEL1                                        |
| Biological Process | GO:0042310 | vasoconstriction                                                                | 7/2279  | 78/18866  | 0.8466013 | 0.9020477 | 0.8162048 | 7  | SLC8A1/GJA5/HRH1/PER2/P2RX1/F2R/AGTR1                               |
| Biological Process | GO:0060632 | regulation of microtubule-<br>based movement                                    | 4/2279  | 48/18866  | 0.8475839 | 0.9027909 | 0.8168773 | 4  | RNASE10/CNIH2/DEFB1/TTC21B                                          |
| Biological Process | GO:1904036 | negative regulation of<br>epithelial cell apoptotic<br>process                  | 4/2279  | 48/18866  | 0.8475839 | 0.9027909 | 0.8168773 | 4  | ANGPT1/TNFAIP3/TCF7L2/NFE2L2                                        |

|                    |            |                                                       |         |           |           |           |           |    |                                                                                                                                      |
|--------------------|------------|-------------------------------------------------------|---------|-----------|-----------|-----------|-----------|----|--------------------------------------------------------------------------------------------------------------------------------------|
| Biological Process | GO:1990573 | potassium ion import across plasma membrane           | 4/2279  | 48/18866  | 0.8475839 | 0.9027909 | 0.8168773 | 4  | KCNJ15/FXYD2/SLC12A1/SLC12A7                                                                                                         |
| Biological Process | GO:0009798 | axis specification                                    | 8/2279  | 88/18866  | 0.8488099 | 0.9039954 | 0.8179671 | 8  | SKI/PKD1L1/DLL1/PCSK6/NOTCH1/TMED2/NODAL/OTX2                                                                                        |
| Biological Process | GO:0009952 | anterior/posterior pattern specification              | 22/2279 | 219/18866 | 0.8499844 | 0.9050418 | 0.8189139 | 22 | LRP5L/SKI/SMAD3/ZEB2/HIPK2/ZBTB16/DLL1/RBPJ/MIB1/PCSK6/RARG/HOXA9/NOTCH1/TMED2/HHEX/SSBP3/ALDH1A2/NODAL/HES3/OTX2/HOXB7/GRSF1        |
| Biological Process | GO:0002758 | innate immune response-activating signal transduction | 11/2279 | 117/18866 | 0.8505171 | 0.9050418 | 0.8189139 | 11 | CLEC4C/MUC12/FCN1/MUC20/BCL10/PSMF1/CREBBP/PSMB7/RELA/FBXW11/PSMD13                                                                  |
| Biological Process | GO:0002377 | immunoglobulin production                             | 21/2279 | 210/18866 | 0.8507691 | 0.9050418 | 0.8189139 | 21 | IGLV3-10/GALNT2/IL10/TRDV2/TNF/TRAF2/TNFSF13B/TLR9/UNG/TGFB1/PHB/PTPRC/POU2F2/TCF3/TP53BP1/TRAF3IP2/CTNBL1/ERCC1/TNFSF13/PAXIP1/NSD2 |
| Biological Process | GO:0035278 | miRNA mediated inhibition of translation              | 9/2279  | 98/18866  | 0.8515569 | 0.9050418 | 0.8189139 | 9  | MIR145/TNRC6B/MIR101-2/AGO1/MIR27A/AGO2/MIR138-2/NOTCH4/EIF4G1                                                                       |
| Biological Process | GO:0040033 | negative regulation of translation, ncRNA-mediated    | 9/2279  | 98/18866  | 0.8515569 | 0.9050418 | 0.8189139 | 9  | MIR145/TNRC6B/MIR101-2/AGO1/MIR27A/AGO2/MIR138-2/NOTCH4/EIF4G1                                                                       |
| Biological Process | GO:0045974 | regulation of translation, ncRNA-mediated             | 9/2279  | 98/18866  | 0.8515569 | 0.9050418 | 0.8189139 | 9  | MIR145/TNRC6B/MIR101-2/AGO1/MIR27A/AGO2/MIR138-2/NOTCH4/EIF4G1                                                                       |
| Biological Process | GO:0048754 | branching morphogenesis of an epithelial tube         | 15/2279 | 155/18866 | 0.8531388 | 0.9050418 | 0.8189139 | 15 | CTS2/TACSTD2/LRP5L/VDR/TNF/TGFBR2/CTSH/ILK/PAX2/RDH10/ENG/BCL2/NOTCH1/NOTCH4/HOXB7                                                   |



|                    |            |                                                                |        |          |           |           |           |   |                    |
|--------------------|------------|----------------------------------------------------------------|--------|----------|-----------|-----------|-----------|---|--------------------|
| Biological Process | GO:0003156 | regulation of animal organ formation                           | 3/2279 | 38/18866 | 0.8539801 | 0.9050418 | 0.8189139 | 3 | WNT11/FGFR1/NOTCH1 |
| Biological Process | GO:0045923 | positive regulation of fatty acid metabolic process            | 3/2279 | 38/18866 | 0.8539801 | 0.9050418 | 0.8189139 | 3 | PPARG/NR1H2/CPT1A  |
| Biological Process | GO:0000244 | spliceosomal tri-snRNP complex assembly                        | 2/2279 | 27/18866 | 0.8545224 | 0.9050418 | 0.8189139 | 2 | PRPF8/PRPF6        |
| Biological Process | GO:0002021 | response to dietary excess                                     | 2/2279 | 27/18866 | 0.8545224 | 0.9050418 | 0.8189139 | 2 | SORL1/SLC25A25     |
| Biological Process | GO:0002026 | regulation of the force of heart contraction                   | 2/2279 | 27/18866 | 0.8545224 | 0.9050418 | 0.8189139 | 2 | SLC8A1/GRK2        |
| Biological Process | GO:0006516 | glycoprotein catabolic process                                 | 2/2279 | 27/18866 | 0.8545224 | 0.9050418 | 0.8189139 | 2 | EDEM1/EDEM2        |
| Biological Process | GO:0006706 | steroid catabolic process                                      | 2/2279 | 27/18866 | 0.8545224 | 0.9050418 | 0.8189139 | 2 | YWHAH/AKR1D1       |
| Biological Process | GO:0009065 | glutamine family amino acid catabolic process                  | 2/2279 | 27/18866 | 0.8545224 | 0.9050418 | 0.8189139 | 2 | ALDH4A1/FAH        |
| Biological Process | GO:0015985 | energy coupled proton transport, down electrochemical gradient | 2/2279 | 27/18866 | 0.8545224 | 0.9050418 | 0.8189139 | 2 | VPS9D1/ATP5PD      |

|                    |            |                                                                      |        |          |           |           |           |   |                 |
|--------------------|------------|----------------------------------------------------------------------|--------|----------|-----------|-----------|-----------|---|-----------------|
| Biological Process | GO:0015986 | ATP synthesis coupled proton transport                               | 2/2279 | 27/18866 | 0.8545224 | 0.9050418 | 0.8189139 | 2 | VPS9D1/ATP5PD   |
| Biological Process | GO:0022400 | regulation of rhodopsin mediated signaling pathway                   | 2/2279 | 27/18866 | 0.8545224 | 0.9050418 | 0.8189139 | 2 | PDE6A/GRK7      |
| Biological Process | GO:0042501 | serine phosphorylation of STAT protein                               | 2/2279 | 27/18866 | 0.8545224 | 0.9050418 | 0.8189139 | 2 | GGNBP2/LIF      |
| Biological Process | GO:0051953 | negative regulation of amine transport                               | 2/2279 | 27/18866 | 0.8545224 | 0.9050418 | 0.8189139 | 2 | SLC43A2/SLC43A1 |
| Biological Process | GO:1902473 | regulation of protein localization to synapse                        | 2/2279 | 27/18866 | 0.8545224 | 0.9050418 | 0.8189139 | 2 | PRKCZ/CNIH2     |
| Biological Process | GO:1904357 | negative regulation of telomere maintenance via telomere lengthening | 2/2279 | 27/18866 | 0.8545224 | 0.9050418 | 0.8189139 | 2 | TNKS/SLX4       |
| Biological Process | GO:0001946 | lymphangiogenesis                                                    | 1/2279 | 15/18866 | 0.8551268 | 0.9050418 | 0.8189139 | 1 | VASH1           |
| Biological Process | GO:0002864 | regulation of acute inflammatory response to antigenic stimulus      | 1/2279 | 15/18866 | 0.8551268 | 0.9050418 | 0.8189139 | 1 | FUT7            |
| Biological Process | GO:0006089 | lactate metabolic process                                            | 1/2279 | 15/18866 | 0.8551268 | 0.9050418 | 0.8189139 | 1 | PER2            |

|                    |            |                                                                |        |          |           |           |           |   |        |
|--------------------|------------|----------------------------------------------------------------|--------|----------|-----------|-----------|-----------|---|--------|
| Biological Process | GO:0006388 | tRNA splicing, via endonucleolytic cleavage and ligation       | 1/2279 | 15/18866 | 0.8551268 | 0.9050418 | 0.8189139 | 1 | CPSF4  |
| Biological Process | GO:0009209 | pyrimidine ribonucleoside triphosphate biosynthetic process    | 1/2279 | 15/18866 | 0.8551268 | 0.9050418 | 0.8189139 | 1 | UCK2   |
| Biological Process | GO:0010455 | positive regulation of cell fate commitment                    | 1/2279 | 15/18866 | 0.8551268 | 0.9050418 | 0.8189139 | 1 | RBPJ   |
| Biological Process | GO:0014856 | skeletal muscle cell proliferation                             | 1/2279 | 15/18866 | 0.8551268 | 0.9050418 | 0.8189139 | 1 | ANGPT1 |
| Biological Process | GO:0016584 | nucleosome positioning                                         | 1/2279 | 15/18866 | 0.8551268 | 0.9050418 | 0.8189139 | 1 | RSF1   |
| Biological Process | GO:0018216 | peptidyl-arginine methylation                                  | 1/2279 | 15/18866 | 0.8551268 | 0.9050418 | 0.8189139 | 1 | PRMT2  |
| Biological Process | GO:0019081 | viral translation                                              | 1/2279 | 15/18866 | 0.8551268 | 0.9050418 | 0.8189139 | 1 | SHFL   |
| Biological Process | GO:0032274 | gonadotropin secretion                                         | 1/2279 | 15/18866 | 0.8551268 | 0.9050418 | 0.8189139 | 1 | INHBA  |
| Biological Process | GO:0032785 | negative regulation of DNA-templated transcription, elongation | 1/2279 | 15/18866 | 0.8551268 | 0.9050418 | 0.8189139 | 1 | RECQL5 |

|                    |            |                                                                                       |        |          |           |           |           |   |         |
|--------------------|------------|---------------------------------------------------------------------------------------|--------|----------|-----------|-----------|-----------|---|---------|
| Biological Process | GO:0033151 | V(D)J recombination                                                                   | 1/2279 | 15/18866 | 0.8551268 | 0.9050418 | 0.8189139 | 1 | TCF3    |
| Biological Process | GO:0035435 | phosphate ion transmembrane transport                                                 | 1/2279 | 15/18866 | 0.8551268 | 0.9050418 | 0.8189139 | 1 | SLC37A1 |
| Biological Process | GO:0035635 | entry of bacterium into host cell                                                     | 1/2279 | 15/18866 | 0.8551268 | 0.9050418 | 0.8189139 | 1 | CDH1    |
| Biological Process | GO:0043518 | negative regulation of DNA damage response, signal transduction by p53 class mediator | 1/2279 | 15/18866 | 0.8551268 | 0.9050418 | 0.8189139 | 1 | MARCH7  |
| Biological Process | GO:0046184 | aldehyde biosynthetic process                                                         | 1/2279 | 15/18866 | 0.8551268 | 0.9050418 | 0.8189139 | 1 | PDXK    |
| Biological Process | GO:0048569 | post-embryonic animal organ development                                               | 1/2279 | 15/18866 | 0.8551268 | 0.9050418 | 0.8189139 | 1 | ERCC1   |
| Biological Process | GO:0048712 | negative regulation of astrocyte differentiation                                      | 1/2279 | 15/18866 | 0.8551268 | 0.9050418 | 0.8189139 | 1 | NF1     |
| Biological Process | GO:0060009 | Sertoli cell development                                                              | 1/2279 | 15/18866 | 0.8551268 | 0.9050418 | 0.8189139 | 1 | NTRK1   |
| Biological Process | GO:0060026 | convergent extension                                                                  | 1/2279 | 15/18866 | 0.8551268 | 0.9050418 | 0.8189139 | 1 | WNT11   |

|                    |            |                                                                     |        |          |           |           |           |   |         |
|--------------------|------------|---------------------------------------------------------------------|--------|----------|-----------|-----------|-----------|---|---------|
| Biological Process | GO:0060049 | regulation of protein glycosylation                                 | 1/2279 | 15/18866 | 0.8551268 | 0.9050418 | 0.8189139 | 1 | POMT2   |
| Biological Process | GO:0060339 | negative regulation of type I interferon-mediated signaling pathway | 1/2279 | 15/18866 | 0.8551268 | 0.9050418 | 0.8189139 | 1 | NLRC5   |
| Biological Process | GO:0060347 | heart trabecula formation                                           | 1/2279 | 15/18866 | 0.8551268 | 0.9050418 | 0.8189139 | 1 | FHL2    |
| Biological Process | GO:0060579 | ventral spinal cord interneuron fate commitment                     | 1/2279 | 15/18866 | 0.8551268 | 0.9050418 | 0.8189139 | 1 | SUFU    |
| Biological Process | GO:0060581 | cell fate commitment involved in pattern specification              | 1/2279 | 15/18866 | 0.8551268 | 0.9050418 | 0.8189139 | 1 | SUFU    |
| Biological Process | GO:0070831 | basement membrane assembly                                          | 1/2279 | 15/18866 | 0.8551268 | 0.9050418 | 0.8189139 | 1 | LAMB3   |
| Biological Process | GO:0097428 | protein maturation by iron-sulfur cluster transfer                  | 1/2279 | 15/18866 | 0.8551268 | 0.9050418 | 0.8189139 | 1 | HSCB    |
| Biological Process | GO:1900119 | positive regulation of execution phase of apoptosis                 | 1/2279 | 15/18866 | 0.8551268 | 0.9050418 | 0.8189139 | 1 | TP53BP2 |
| Biological Process | GO:1902260 | negative regulation of delayed rectifier potassium channel activity | 1/2279 | 15/18866 | 0.8551268 | 0.9050418 | 0.8189139 | 1 | KCNE1   |

|                    |            |                                                                   |         |           |           |           |           |    |                                                                                                       |
|--------------------|------------|-------------------------------------------------------------------|---------|-----------|-----------|-----------|-----------|----|-------------------------------------------------------------------------------------------------------|
| Biological Process | GO:1905146 | lysosomal protein catabolic process                               | 1/2279  | 15/18866  | 0.8551268 | 0.9050418 | 0.8189139 | 1  | MGAT3                                                                                                 |
| Biological Process | GO:2000095 | regulation of Wnt signaling pathway, planar cell polarity pathway | 1/2279  | 15/18866  | 0.8551268 | 0.9050418 | 0.8189139 | 1  | ANKRD6                                                                                                |
| Biological Process | GO:2001028 | positive regulation of endothelial cell chemotaxis                | 1/2279  | 15/18866  | 0.8551268 | 0.9050418 | 0.8189139 | 1  | FGFR1                                                                                                 |
| Biological Process | GO:2001171 | positive regulation of ATP biosynthetic process                   | 1/2279  | 15/18866  | 0.8551268 | 0.9050418 | 0.8189139 | 1  | ENO1                                                                                                  |
| Biological Process | GO:0010469 | regulation of signaling receptor activity                         | 17/2279 | 174/18866 | 0.8556866 | 0.9052524 | 0.8191046 | 17 | PDE4D/PLAU/TGFA/IL10/CCR2/NCK2/LY6G6D/APP/DLGAP4/CRHBP/CNIH2/BEGAIN/MAPK8IP2/GSG1L/MEF2C/SHANK2/NPTX1 |
| Biological Process | GO:0090398 | cellular senescence                                               | 7/2279  | 79/18866  | 0.8556893 | 0.9052524 | 0.8191046 | 7  | CALR/MAP3K3/NSMCE2/AKT3/VASH1/ARNTL/NEK6                                                              |
| Biological Process | GO:1900034 | regulation of cellular response to heat                           | 7/2279  | 79/18866  | 0.8556893 | 0.9052524 | 0.8191046 | 7  | RPTOR/RAE1/NUP93/DNAJB6/SEC13/CREBBP/BAG5                                                             |
| Biological Process | GO:0001658 | branching involved in ureteric bud morphogenesis                  | 5/2279  | 59/18866  | 0.855707  | 0.9052524 | 0.8191046 | 5  | TACSTD2/ILK/PAX2/BCL2/HOXB7                                                                           |
| Biological Process | GO:0003254 | regulation of membrane depolarization                             | 4/2279  | 49/18866  | 0.8588085 | 0.9083313 | 0.8218904 | 4  | GJA5/HSH2D/SMAD7/BCL2                                                                                 |

|                    |            |                                                                |         |           |           |           |           |    |                                                                                                                                                                                                                                                                                            |
|--------------------|------------|----------------------------------------------------------------|---------|-----------|-----------|-----------|-----------|----|--------------------------------------------------------------------------------------------------------------------------------------------------------------------------------------------------------------------------------------------------------------------------------------------|
| Biological Process | GO:0021517 | ventral spinal cord development                                | 4/2279  | 49/18866  | 0.8588085 | 0.9083313 | 0.8218904 | 4  | DCTN1/PHOX2A/SUFU/LMO4                                                                                                                                                                                                                                                                     |
| Biological Process | GO:0015837 | amine transport                                                | 9/2279  | 99/18866  | 0.8595619 | 0.9088406 | 0.8223512 | 9  | DDC/SLC43A2/PER2/SYT17/SLC43A1/DTNBP1/AQP9/GRK2/PRKN                                                                                                                                                                                                                                       |
| Biological Process | GO:0003341 | cilium movement                                                | 15/2279 | 156/18866 | 0.8595771 | 0.9088406 | 0.8223512 | 15 | PLTP/RFX3/RNASE10/DEFB1/IQCG/STK36/ARMC2/DNAI2/CCNYL1/TTLL1/NPHP4/CFAP221/KATNIP/CFAP61/CFAP46                                                                                                                                                                                             |
| Biological Process | GO:0034401 | chromatin organization involved in regulation of transcription | 15/2279 | 156/18866 | 0.8595771 | 0.9088406 | 0.8223512 | 15 | SERTAD2/PADI2/HDAC1/ZMIZ1/KMT2D/CTBP1/ARID1B/ATF7IP/SMARCD1/DNMT1/ZNF1/DYDC2/DYDC1/MACROH2A2/H3C1                                                                                                                                                                                          |
| Biological Process | GO:0019724 | B cell mediated immunity                                       | 23/2279 | 230/18866 | 0.8601477 | 0.9093428 | 0.8228056 | 23 | IL10/CD55/INPP5D/TNF/IGHV6-1/CD226/PTPN6/CLU/UNG/TGFB1/C1S/PTPRC/BCL10/POU2F2/TP53BP1/ERCC1/TNFSF13/C1QB/BCL3/PAXIP1/C1RL/NSD2/SLA2                                                                                                                                                        |
| Biological Process | GO:0042445 | hormone metabolic process                                      | 22/2279 | 221/18866 | 0.8609608 | 0.910101  | 0.8234917 | 22 | CTSZ/PNPLA2/CTSG/DHRS9/AKR1D1/HSD17B2/TG/COMT/TCF7L2/PCSK6/FDX1/CRHBP/RDH10/DGKQ/POR/CPQ/GNB3/CTSB/CRYM/ALDH1A2/PRLHR/AOPEP                                                                                                                                                                |
| Biological Process | GO:0055123 | digestive system development                                   | 14/2279 | 147/18866 | 0.8620062 | 0.9111048 | 0.8244    | 14 | SMAD3/TNF/EPHB3/TGFBR2/WNT11/RB1/BCL2/NOTCH1/PDGFC/HLX/CHD8/ALDH1A2/NPY/NODAL                                                                                                                                                                                                              |
| Biological Process | GO:0007389 | pattern specification process                                  | 48/2279 | 455/18866 | 0.8623066 | 0.9113209 | 0.8245955 | 48 | NRP2/SHROOM3/LRP5L/SKI/CHSY1/SMAD3/PKD1L1/SUFU/ZEB2/HIPK2/MICAL2/ZBTB16/TGFBR2/RFX3/DLL1/RBPJ/MIB1/PCSK6/WNT11/PAX2/AP1B1/FGFR1/SYNGAP1/PAX7/DSCAML1/RARG/BMP1B/IFT140/MEIS2/ENG/HOXA9/MEIS1/TTC21B/NOTCH1/ALX3/MEF2C/TMED2/HHEX/ASPH/DNAI2/SSBP3/ALDH1A2/NODAL/HES3/OTX2/NTF4/HOXB7/GRSF1 |
| Biological Process | GO:0009408 | response to heat                                               | 16/2279 | 166/18866 | 0.8636078 | 0.9125946 | 0.825748  | 16 | RPTOR/RAE1/EIF2B5/ABCC2/THBS1/NF1/NUP93/TGFB11/DNAJB6/SEC13/CREBBP/CPB2/TRPV2/CASQ1/BAG5/SST                                                                                                                                                                                               |

|                    |            |                                                         |        |          |           |           |           |   |                                           |
|--------------------|------------|---------------------------------------------------------|--------|----------|-----------|-----------|-----------|---|-------------------------------------------|
| Biological Process | GO:0006879 | cellular iron ion homeostasis                           | 6/2279 | 70/18866 | 0.864192  | 0.9128552 | 0.8259838 | 6 | LCN2/SLC11A1/TTC7A/SLC11A2/LTF/NCOA4      |
| Biological Process | GO:0032374 | regulation of cholesterol transport                     | 6/2279 | 70/18866 | 0.864192  | 0.9128552 | 0.8259838 | 6 | ABCG1/PLTP/MIR27A/OSBPL6/NR1H2/ABCA1      |
| Biological Process | GO:0035082 | axoneme assembly                                        | 6/2279 | 70/18866 | 0.864192  | 0.9128552 | 0.8259838 | 6 | DNAJB13/IQCG/ARMC2/DNAI2/TLL1/CFAP46      |
| Biological Process | GO:0009988 | cell-cell recognition                                   | 7/2279 | 80/18866 | 0.8643349 | 0.9128552 | 0.8259838 | 7 | CD9/FOLR3/NCK2/CLGN/DOCK8/UBAP2L/DOCK2    |
| Biological Process | GO:0070828 | heterochromatin organization                            | 7/2279 | 80/18866 | 0.8643349 | 0.9128552 | 0.8259838 | 7 | HDAC1/ATF7IP/PRDM16/DNMT1/ZNF1/MECOM/H3C1 |
| Biological Process | GO:0051784 | negative regulation of nuclear division                 | 5/2279 | 60/18866 | 0.8655528 | 0.913813  | 0.8268505 | 5 | MAD1L1/TNKS/AURKAIP1/LIF/PCID2            |
| Biological Process | GO:1902808 | positive regulation of cell cycle G1/S phase transition | 5/2279 | 60/18866 | 0.8655528 | 0.913813  | 0.8268505 | 5 | RPTOR/TFDP1/PLCB1/PLRG1/EIF4G1            |
| Biological Process | GO:0007210 | serotonin receptor signaling pathway                    | 3/2279 | 39/18866 | 0.8660112 | 0.913813  | 0.8268505 | 3 | HRH1/HTR3A/CHRM2                          |
| Biological Process | GO:0007431 | salivary gland development                              | 3/2279 | 39/18866 | 0.8660112 | 0.913813  | 0.8268505 | 3 | TNF/FGFR1/TGFB1                           |



|                    |            |                                                   |        |          |           |           |           |   |                   |
|--------------------|------------|---------------------------------------------------|--------|----------|-----------|-----------|-----------|---|-------------------|
| Biological Process | GO:0030049 | muscle filament sliding                           | 3/2279 | 39/18866 | 0.8660112 | 0.913813  | 0.8268505 | 3 | TTN/TNNT3/TMOD1   |
| Biological Process | GO:0033275 | actin-myosin filament sliding                     | 3/2279 | 39/18866 | 0.8660112 | 0.913813  | 0.8268505 | 3 | TTN/TNNT3/TMOD1   |
| Biological Process | GO:1902116 | negative regulation of organelle assembly         | 3/2279 | 39/18866 | 0.8660112 | 0.913813  | 0.8268505 | 3 | DNM2/FEZ2/ARHGEF2 |
| Biological Process | GO:2000279 | negative regulation of DNA biosynthetic process   | 3/2279 | 39/18866 | 0.8660112 | 0.913813  | 0.8268505 | 3 | PPARG/NPPC/ANKRD1 |
| Biological Process | GO:0010460 | positive regulation of heart rate                 | 2/2279 | 28/18866 | 0.868383  | 0.9151976 | 0.8281033 | 2 | PDE4D/KCNQ1       |
| Biological Process | GO:0015867 | ATP transport                                     | 2/2279 | 28/18866 | 0.868383  | 0.9151976 | 0.8281033 | 2 | SLC25A25/SLC25A1  |
| Biological Process | GO:0045686 | negative regulation of glial cell differentiation | 2/2279 | 28/18866 | 0.868383  | 0.9151976 | 0.8281033 | 2 | NF1/NOTCH1        |
| Biological Process | GO:0045932 | negative regulation of muscle contraction         | 2/2279 | 28/18866 | 0.868383  | 0.9151976 | 0.8281033 | 2 | BIN1/GRK2         |
| Biological Process | GO:0072376 | protein activation cascade                        | 2/2279 | 28/18866 | 0.868383  | 0.9151976 | 0.8281033 | 2 | GP9/F12           |

|                    |            |                                                                                                       |        |          |           |           |           |   |                            |
|--------------------|------------|-------------------------------------------------------------------------------------------------------|--------|----------|-----------|-----------|-----------|---|----------------------------|
| Biological Process | GO:0072378 | blood coagulation, fibrin clot formation                                                              | 2/2279 | 28/18866 | 0.868383  | 0.9151976 | 0.8281033 | 2 | GP9/F12                    |
| Biological Process | GO:0080111 | DNA demethylation                                                                                     | 2/2279 | 28/18866 | 0.868383  | 0.9151976 | 0.8281033 | 2 | FTO/TET2                   |
| Biological Process | GO:0099560 | synaptic membrane adhesion                                                                            | 2/2279 | 28/18866 | 0.868383  | 0.9151976 | 0.8281033 | 2 | SPARCL1/NRXN1              |
| Biological Process | GO:1903579 | negative regulation of ATP metabolic process                                                          | 2/2279 | 28/18866 | 0.868383  | 0.9151976 | 0.8281033 | 2 | HDAC4/CBFA2T3              |
| Biological Process | GO:1903588 | negative regulation of blood vessel endothelial cell proliferation involved in sprouting angiogenesis | 2/2279 | 28/18866 | 0.868383  | 0.9151976 | 0.8281033 | 2 | THBS1/MIR24-2              |
| Biological Process | GO:2000191 | regulation of fatty acid transport                                                                    | 2/2279 | 28/18866 | 0.868383  | 0.9151976 | 0.8281033 | 2 | MAP2K6/THBS1               |
| Biological Process | GO:0021695 | cerebellar cortex development                                                                         | 4/2279 | 50/18866 | 0.8693196 | 0.91588   | 0.8287207 | 4 | DLL1/TTC21B/TLL1/COQ8B     |
| Biological Process | GO:0071715 | icosanoid transport                                                                                   | 4/2279 | 50/18866 | 0.8693196 | 0.91588   | 0.8287207 | 4 | ABCC1/MAP2K6/ABCC2/SLCO3A1 |
| Biological Process | GO:1901571 | fatty acid derivative transport                                                                       | 4/2279 | 50/18866 | 0.8693196 | 0.91588   | 0.8287207 | 4 | ABCC1/MAP2K6/ABCC2/SLCO3A1 |

|                    |            |                                             |        |          |           |           |           |   |                                             |
|--------------------|------------|---------------------------------------------|--------|----------|-----------|-----------|-----------|---|---------------------------------------------|
| Biological Process | GO:0021766 | hippocampus development                     | 7/2279 | 81/18866 | 0.8725511 | 0.9165339 | 0.8293124 | 7 | MFSD2A/ZEB2/EIF2B5/HDAC1/RARA/KIRREL3/NCOA1 |
| Biological Process | GO:0002070 | epithelial cell maturation                  | 1/2279 | 16/18866 | 0.8726413 | 0.9165339 | 0.8293124 | 1 | RFX3                                        |
| Biological Process | GO:0002834 | regulation of response to tumor cell        | 1/2279 | 16/18866 | 0.8726413 | 0.9165339 | 0.8293124 | 1 | CD226                                       |
| Biological Process | GO:0002837 | regulation of immune response to tumor cell | 1/2279 | 16/18866 | 0.8726413 | 0.9165339 | 0.8293124 | 1 | CD226                                       |
| Biological Process | GO:0006098 | pentose-phosphate shunt                     | 1/2279 | 16/18866 | 0.8726413 | 0.9165339 | 0.8293124 | 1 | PGAM1                                       |
| Biological Process | GO:0006390 | mitochondrial transcription                 | 1/2279 | 16/18866 | 0.8726413 | 0.9165339 | 0.8293124 | 1 | PRKAA1                                      |
| Biological Process | GO:0006544 | glycine metabolic process                   | 1/2279 | 16/18866 | 0.8726413 | 0.9165339 | 0.8293124 | 1 | AGXT                                        |
| Biological Process | GO:0007351 | tripartite regional subdivision             | 1/2279 | 16/18866 | 0.8726413 | 0.9165339 | 0.8293124 | 1 | PCSK6                                       |
| Biological Process | GO:0007379 | segment specification                       | 1/2279 | 16/18866 | 0.8726413 | 0.9165339 | 0.8293124 | 1 | DLL1                                        |

|                    |            |                                                          |        |          |           |           |           |   |          |
|--------------------|------------|----------------------------------------------------------|--------|----------|-----------|-----------|-----------|---|----------|
| Biological Process | GO:0008595 | anterior/posterior axis specification, embryo            | 1/2279 | 16/18866 | 0.8726413 | 0.9165339 | 0.8293124 | 1 | PCSK6    |
| Biological Process | GO:0009208 | pyrimidine ribonucleoside triphosphate metabolic process | 1/2279 | 16/18866 | 0.8726413 | 0.9165339 | 0.8293124 | 1 | UCK2     |
| Biological Process | GO:0009812 | flavonoid metabolic process                              | 1/2279 | 16/18866 | 0.8726413 | 0.9165339 | 0.8293124 | 1 | POR      |
| Biological Process | GO:0015812 | gamma-aminobutyric acid transport                        | 1/2279 | 16/18866 | 0.8726413 | 0.9165339 | 0.8293124 | 1 | NF1      |
| Biological Process | GO:0016446 | somatic hypermutation of immunoglobulin genes            | 1/2279 | 16/18866 | 0.8726413 | 0.9165339 | 0.8293124 | 1 | UNG      |
| Biological Process | GO:0031269 | pseudopodium assembly                                    | 1/2279 | 16/18866 | 0.8726413 | 0.9165339 | 0.8293124 | 1 | CDC42EP1 |
| Biological Process | GO:0042487 | regulation of odontogenesis of dentin-containing tooth   | 1/2279 | 16/18866 | 0.8726413 | 0.9165339 | 0.8293124 | 1 | RUNX2    |
| Biological Process | GO:0043508 | negative regulation of JUN kinase activity               | 1/2279 | 16/18866 | 0.8726413 | 0.9165339 | 0.8293124 | 1 | HIPK3    |
| Biological Process | GO:0045116 | protein neddylation                                      | 1/2279 | 16/18866 | 0.8726413 | 0.9165339 | 0.8293124 | 1 | NAE1     |

|                    |            |                                                             |        |          |           |           |           |   |        |
|--------------------|------------|-------------------------------------------------------------|--------|----------|-----------|-----------|-----------|---|--------|
| Biological Process | GO:0046500 | S-adenosylmethionine metabolic process                      | 1/2279 | 16/18866 | 0.8726413 | 0.9165339 | 0.8293124 | 1 | MAT1A  |
| Biological Process | GO:0046831 | regulation of RNA export from nucleus                       | 1/2279 | 16/18866 | 0.8726413 | 0.9165339 | 0.8293124 | 1 | SETD2  |
| Biological Process | GO:0060572 | morphogenesis of an epithelial bud                          | 1/2279 | 16/18866 | 0.8726413 | 0.9165339 | 0.8293124 | 1 | RDH10  |
| Biological Process | GO:0060628 | regulation of ER to Golgi vesicle-mediated transport        | 1/2279 | 16/18866 | 0.8726413 | 0.9165339 | 0.8293124 | 1 | SORL1  |
| Biological Process | GO:0061548 | ganglion development                                        | 1/2279 | 16/18866 | 0.8726413 | 0.9165339 | 0.8293124 | 1 | NRP2   |
| Biological Process | GO:0080009 | mRNA methylation                                            | 1/2279 | 16/18866 | 0.8726413 | 0.9165339 | 0.8293124 | 1 | METTL8 |
| Biological Process | GO:1900451 | positive regulation of glutamate receptor signaling pathway | 1/2279 | 16/18866 | 0.8726413 | 0.9165339 | 0.8293124 | 1 | CCR2   |
| Biological Process | GO:1903541 | regulation of exosomal secretion                            | 1/2279 | 16/18866 | 0.8726413 | 0.9165339 | 0.8293124 | 1 | PRKN   |
| Biological Process | GO:1905050 | positive regulation of metallopeptidase activity            | 1/2279 | 16/18866 | 0.8726413 | 0.9165339 | 0.8293124 | 1 | MBP    |

|                    |            |                                                                                 |         |           |           |           |           |    |                                                                                                                       |
|--------------------|------------|---------------------------------------------------------------------------------|---------|-----------|-----------|-----------|-----------|----|-----------------------------------------------------------------------------------------------------------------------|
| Biological Process | GO:2001034 | positive regulation of double-strand break repair via nonhomologous end joining | 1/2279  | 16/18866  | 0.8726413 | 0.9165339 | 0.8293124 | 1  | PARP9                                                                                                                 |
| Biological Process | GO:0045921 | positive regulation of exocytosis                                               | 8/2279  | 91/18866  | 0.8731982 | 0.9170174 | 0.8297499 | 8  | CD177/GAB2/FGR/RAB27A/HLA-F/SPHK2/ITGB2/DNM1L                                                                         |
| Biological Process | GO:0019217 | regulation of fatty acid metabolic process                                      | 9/2279  | 101/18866 | 0.8745316 | 0.9183162 | 0.8309251 | 9  | PRKAG2/PPARG/MFSD2A/NR1H2/ACACB/SREBF1/WDTC1/CPT1A/ACADVL                                                             |
| Biological Process | GO:0009566 | fertilization                                                                   | 19/2279 | 196/18866 | 0.8751226 | 0.9188352 | 0.8313947 | 19 | CECR2/CD9/ACRBP/HEXB/FOLR3/MEIOB/RNASE10/CLGN/IGSF8/LHFPL2/PLCB1/HOXA9/RAD21L1/UBAP2L/UBE3A/BCL2L1/SPTBN4/UBXN8/IRAG2 |
| Biological Process | GO:0010719 | negative regulation of epithelial to mesenchymal transition                     | 3/2279  | 40/18866  | 0.8771597 | 0.9205671 | 0.8329618 | 3  | SPRED2/LDLRAD4/SMAD7                                                                                                  |
| Biological Process | GO:0030488 | tRNA methylation                                                                | 3/2279  | 40/18866  | 0.8771597 | 0.9205671 | 0.8329618 | 3  | THADA/METTL6/METTL8                                                                                                   |
| Biological Process | GO:0098534 | centriole assembly                                                              | 3/2279  | 40/18866  | 0.8771597 | 0.9205671 | 0.8329618 | 3  | CEP135/CEP72/CEP295NL                                                                                                 |
| Biological Process | GO:1903427 | negative regulation of reactive oxygen species biosynthetic process             | 3/2279  | 40/18866  | 0.8771597 | 0.9205671 | 0.8329618 | 3  | IL10/MIR199A1/MIR199A2                                                                                                |
| Biological Process | GO:0009308 | amine metabolic process                                                         | 13/2279 | 140/18866 | 0.8773812 | 0.9206979 | 0.8330801 | 13 | ABCC2/ODC1/COMT/DDC/SULT1A2/SLC7A7/PSMF1/ITGB2/PSMB7/SAT2/HNMT/PSMD13/PRKN                                            |

|                    |            |                                                                            |         |           |           |           |           |    |                                                                                                                                             |
|--------------------|------------|----------------------------------------------------------------------------|---------|-----------|-----------|-----------|-----------|----|---------------------------------------------------------------------------------------------------------------------------------------------|
| Biological Process | GO:1902600 | proton transmembrane transport                                             | 15/2279 | 159/18866 | 0.8775805 | 0.9208053 | 0.8331773 | 15 | SLC11A2/TESC/SLC2A9/ATP6V1B2/ACTN4/VPS9D1/SPHK2/ATP2A3/SLC36A3/SLC33A1/ATP6V0B/NDUFA4L2/ATP5PD/ATP6V0C/ATP6V1C1                             |
| Biological Process | GO:0016079 | synaptic vesicle exocytosis                                                | 11/2279 | 121/18866 | 0.8784607 | 0.9216271 | 0.8339209 | 11 | RAP1B/GIT1/APBA2/PRKCB/VPS18/CTBP2/CHRM2/P2RX1/DNM1L/SYT17/DTNBP1                                                                           |
| Biological Process | GO:0065004 | protein-DNA complex assembly                                               | 24/2279 | 243/18866 | 0.8790346 | 0.9221274 | 0.8343736 | 24 | TAF1C/CREB1/UBN1/RAD52/CABIN1/MCM5/SMYD3/MIS12/ATF7IP/MCM2/BRF1/RSF1/CCNH/RB1/DMC1/PIH1D1/CENPM/RUVBL1/CHAF1A/XPA/ERCC2/BRD2/MACROH2A2/H3C1 |
| Biological Process | GO:0031113 | regulation of microtubule polymerization                                   | 4/2279  | 51/18866  | 0.8791496 | 0.9221462 | 0.8343906 | 4  | TBCD/DCTN1/NAV3/NUMA1                                                                                                                       |
| Biological Process | GO:1903313 | positive regulation of mRNA metabolic process                              | 7/2279  | 82/18866  | 0.8803513 | 0.9233048 | 0.8354389 | 7  | PRR5L/TNRC6B/ZC3H12D/AGO2/CPEB3/DAZAP1/FTO                                                                                                  |
| Biological Process | GO:0038095 | Fc-epsilon receptor signaling pathway                                      | 16/2279 | 169/18866 | 0.8807521 | 0.923394  | 0.8355197 | 16 | LAT/PIK3R1/GAB2/GRAP2/NFATC2/NFATC1/FER/VAV2/BCL10/PSMF1/PSMB7/PLCG1/RELA/FBXW11/PSMD13/VAV3                                                |
| Biological Process | GO:0044106 | cellular amine metabolic process                                           | 12/2279 | 131/18866 | 0.8808068 | 0.923394  | 0.8355197 | 12 | ABCC2/ODC1/COMT/DDC/SLC7A7/PSMF1/ITGB2/PSMB7/SAT2/HNMT/PSMD13/PRKN                                                                          |
| Biological Process | GO:0006515 | protein quality control for misfolded or incompletely synthesized proteins | 2/2279  | 29/18866  | 0.8810195 | 0.923394  | 0.8355197 | 2  | CUL3/POMT2                                                                                                                                  |
| Biological Process | GO:0008209 | androgen metabolic process                                                 | 2/2279  | 29/18866  | 0.8810195 | 0.923394  | 0.8355197 | 2  | DHRS9/AKR1D1                                                                                                                                |

|                    |            |                                             |         |           |           |           |           |    |                                                                                                                                      |
|--------------------|------------|---------------------------------------------|---------|-----------|-----------|-----------|-----------|----|--------------------------------------------------------------------------------------------------------------------------------------|
| Biological Process | GO:0032196 | transposition                               | 2/2279  | 29/18866  | 0.8810195 | 0.923394  | 0.8355197 | 2  | PIWIL4/MORC1                                                                                                                         |
| Biological Process | GO:0036151 | phosphatidylcholine acyl-chain remodeling   | 2/2279  | 29/18866  | 0.8810195 | 0.923394  | 0.8355197 | 2  | LPCAT1/NR1H2                                                                                                                         |
| Biological Process | GO:0019226 | transmission of nerve impulse               | 6/2279  | 72/18866  | 0.8811726 | 0.9234526 | 0.8355727 | 6  | SCN1A/JAM3/GHRL/P2RX1/CNTNAP1/SPTBN4                                                                                                 |
| Biological Process | GO:0032355 | response to estradiol                       | 13/2279 | 141/18866 | 0.8833001 | 0.92558   | 0.8374976 | 13 | CALR/IL10/NCOR2/GGT1/ABCC2/TGFB1/CRHBP/RARA/NCOA1/CAT/ETS1/PDGFRB/ALDH1A2                                                            |
| Biological Process | GO:0001539 | cilium or flagellum-dependent cell motility | 11/2279 | 122/18866 | 0.8847446 | 0.9268893 | 0.8386823 | 11 | DNAH3/PLTP/RFX3/RNASE10/DEFB1/IQCG/ARMC2/CCNYL1/TTL1/NPHP4/CFAP46                                                                    |
| Biological Process | GO:0060285 | cilium-dependent cell motility              | 11/2279 | 122/18866 | 0.8847446 | 0.9268893 | 0.8386823 | 11 | DNAH3/PLTP/RFX3/RNASE10/DEFB1/IQCG/ARMC2/CCNYL1/TTL1/NPHP4/CFAP46                                                                    |
| Biological Process | GO:0008037 | cell recognition                            | 22/2279 | 226/18866 | 0.8857162 | 0.9269669 | 0.8387526 | 22 | BSG/CD9/NCAM2/FOLR3/NCK2/EPHB3/IGHV6-1/RTN4/CD226/APP/COLEC12/TNFRSF21/CLGN/DOCK8/FCN1/DSCAML1/YWHAZ/UBAP2L/PCDH12/DOCK2/CADM1/OPCML |
| Biological Process | GO:0033574 | response to testosterone                    | 3/2279  | 41/18866  | 0.8874761 | 0.9269669 | 0.8387526 | 3  | CALR/THBS1/NCOA4                                                                                                                     |
| Biological Process | GO:0046825 | regulation of protein export from nucleus   | 3/2279  | 41/18866  | 0.8874761 | 0.9269669 | 0.8387526 | 3  | SETD2/TCF7L2/SP100                                                                                                                   |



|                    |            |                                                                         |        |          |           |           |           |   |                                                     |
|--------------------|------------|-------------------------------------------------------------------------|--------|----------|-----------|-----------|-----------|---|-----------------------------------------------------|
| Biological Process | GO:0050434 | positive regulation of viral transcription                              | 3/2279 | 41/18866 | 0.8874761 | 0.9269669 | 0.8387526 | 3 | CTDP1/POLR2F/RSF1                                   |
| Biological Process | GO:1900117 | regulation of execution phase of apoptosis                              | 3/2279 | 41/18866 | 0.8874761 | 0.9269669 | 0.8387526 | 3 | PAM16/TP53BP2/BCL2L1                                |
| Biological Process | GO:0031146 | SCF-dependent proteasomal ubiquitin-dependent protein catabolic process | 8/2279 | 93/18866 | 0.887592  | 0.9269669 | 0.8387526 | 8 | WWTR1/PSMF1/FBXL13/FBXL18/PSMB7/FBXL6/FBXW11/PSMD13 |
| Biological Process | GO:0031145 | anaphase-promoting complex-dependent catabolic process                  | 7/2279 | 83/18866 | 0.8877494 | 0.9269669 | 0.8387526 | 7 | FZR1/CUL3/CDC16/PSMF1/PSMB7/ANAPC7/PSMD13           |
| Biological Process | GO:0000963 | mitochondrial RNA processing                                            | 1/2279 | 17/18866 | 0.8880392 | 0.9269669 | 0.8387526 | 1 | TBRG4                                               |
| Biological Process | GO:0002566 | somatic diversification of immune receptors via somatic mutation        | 1/2279 | 17/18866 | 0.8880392 | 0.9269669 | 0.8387526 | 1 | UNG                                                 |
| Biological Process | GO:0006586 | indolalkylamine metabolic process                                       | 1/2279 | 17/18866 | 0.8880392 | 0.9269669 | 0.8387526 | 1 | DDC                                                 |
| Biological Process | GO:0007635 | chemosensory behavior                                                   | 1/2279 | 17/18866 | 0.8880392 | 0.9269669 | 0.8387526 | 1 | NTRK1                                               |
| Biological Process | GO:0010566 | regulation of ketone biosynthetic process                               | 1/2279 | 17/18866 | 0.8880392 | 0.9269669 | 0.8387526 | 1 | DGKQ                                                |

|                    |            |                                                    |        |          |           |           |           |   |          |
|--------------------|------------|----------------------------------------------------|--------|----------|-----------|-----------|-----------|---|----------|
| Biological Process | GO:0030322 | stabilization of membrane potential                | 1/2279 | 17/18866 | 0.8880392 | 0.9269669 | 0.8387526 | 1 | KCNK6    |
| Biological Process | GO:0030540 | female genitalia development                       | 1/2279 | 17/18866 | 0.8880392 | 0.9269669 | 0.8387526 | 1 | TYRO3    |
| Biological Process | GO:0031268 | pseudopodium organization                          | 1/2279 | 17/18866 | 0.8880392 | 0.9269669 | 0.8387526 | 1 | CDC42EP1 |
| Biological Process | GO:0031649 | heat generation                                    | 1/2279 | 17/18866 | 0.8880392 | 0.9269669 | 0.8387526 | 1 | TNF      |
| Biological Process | GO:0032305 | positive regulation of icosanoid secretion         | 1/2279 | 17/18866 | 0.8880392 | 0.9269669 | 0.8387526 | 1 | MAP2K6   |
| Biological Process | GO:0035518 | histone H2A monoubiquitination                     | 1/2279 | 17/18866 | 0.8880392 | 0.9269669 | 0.8387526 | 1 | PCGF3    |
| Biological Process | GO:0043923 | positive regulation by host of viral transcription | 1/2279 | 17/18866 | 0.8880392 | 0.9269669 | 0.8387526 | 1 | CTDP1    |
| Biological Process | GO:0045722 | positive regulation of gluconeogenesis             | 1/2279 | 17/18866 | 0.8880392 | 0.9269669 | 0.8387526 | 1 | FOXO1    |
| Biological Process | GO:0048243 | norepinephrine secretion                           | 1/2279 | 17/18866 | 0.8880392 | 0.9269669 | 0.8387526 | 1 | NISCH    |

|                    |            |                                                     |        |          |           |           |           |   |        |
|--------------------|------------|-----------------------------------------------------|--------|----------|-----------|-----------|-----------|---|--------|
| Biological Process | GO:0051382 | kinetochore assembly                                | 1/2279 | 17/18866 | 0.8880392 | 0.9269669 | 0.8387526 | 1 | MIS12  |
| Biological Process | GO:0051969 | regulation of transmission of nerve impulse         | 1/2279 | 17/18866 | 0.8880392 | 0.9269669 | 0.8387526 | 1 | GHRL   |
| Biological Process | GO:0055089 | fatty acid homeostasis                              | 1/2279 | 17/18866 | 0.8880392 | 0.9269669 | 0.8387526 | 1 | PRKAA1 |
| Biological Process | GO:0061687 | detoxification of inorganic compound                | 1/2279 | 17/18866 | 0.8880392 | 0.9269669 | 0.8387526 | 1 | ABCC2  |
| Biological Process | GO:0071850 | mitotic cell cycle arrest                           | 1/2279 | 17/18866 | 0.8880392 | 0.9269669 | 0.8387526 | 1 | CDC14A |
| Biological Process | GO:0090494 | dopamine uptake                                     | 1/2279 | 17/18866 | 0.8880392 | 0.9269669 | 0.8387526 | 1 | PRKN   |
| Biological Process | GO:0097094 | craniofacial suture morphogenesis                   | 1/2279 | 17/18866 | 0.8880392 | 0.9269669 | 0.8387526 | 1 | FOXN3  |
| Biological Process | GO:1901673 | regulation of mitotic spindle assembly              | 1/2279 | 17/18866 | 0.8880392 | 0.9269669 | 0.8387526 | 1 | RCC1   |
| Biological Process | GO:1902931 | negative regulation of alcohol biosynthetic process | 1/2279 | 17/18866 | 0.8880392 | 0.9269669 | 0.8387526 | 1 | GFI1   |

|                    |            |                                                                 |         |           |           |           |           |    |                                                                                                                                                                         |
|--------------------|------------|-----------------------------------------------------------------|---------|-----------|-----------|-----------|-----------|----|-------------------------------------------------------------------------------------------------------------------------------------------------------------------------|
| Biological Process | GO:1903209 | positive regulation of oxidative stress-induced cell death      | 1/2279  | 17/18866  | 0.8880392 | 0.9269669 | 0.8387526 | 1  | RIPK1                                                                                                                                                                   |
| Biological Process | GO:1903818 | positive regulation of voltage-gated potassium channel activity | 1/2279  | 17/18866  | 0.8880392 | 0.9269669 | 0.8387526 | 1  | NOS1AP                                                                                                                                                                  |
| Biological Process | GO:2000001 | regulation of DNA damage checkpoint                             | 1/2279  | 17/18866  | 0.8880392 | 0.9269669 | 0.8387526 | 1  | CHEK2                                                                                                                                                                   |
| Biological Process | GO:0006301 | postreplication repair                                          | 4/2279  | 52/18866  | 0.8883311 | 0.9269669 | 0.8387526 | 4  | UBE2V1/POLD3/PARP10/POLI                                                                                                                                                |
| Biological Process | GO:0045839 | negative regulation of mitotic nuclear division                 | 4/2279  | 52/18866  | 0.8883311 | 0.9269669 | 0.8387526 | 4  | MAD1L1/TNKS/AURKAIP1/PCID2                                                                                                                                              |
| Biological Process | GO:2000677 | regulation of transcription regulatory region DNA binding       | 4/2279  | 52/18866  | 0.8883311 | 0.9269669 | 0.8387526 | 4  | TGFB1/PER2/RB1/LIF                                                                                                                                                      |
| Biological Process | GO:0072078 | nephron tubule morphogenesis                                    | 6/2279  | 73/18866  | 0.888969  | 0.9274334 | 0.8391747 | 6  | TACSTD2/ILK/WNT11/PAX2/BCL2/HOXB7                                                                                                                                       |
| Biological Process | GO:0071824 | protein-DNA complex subunit organization                        | 28/2279 | 282/18866 | 0.8889734 | 0.9274334 | 0.8391747 | 28 | TAF1C/SRCAP/CREB1/UBN1/RAD52/SETD2/CABIN1/MCM5/SMYD3/MIS12/ATF7IP/MCM2/BRF1/RSF1/CCNH/SMARCD1/SMARCD2/RB1/DMC1/PIH1D1/CENPM/RUVBL1/CHAF1A/XPA/ERCC2/BRD2/MACROH2A2/H3C1 |
| Biological Process | GO:0002223 | stimulatory C-type lectin receptor signaling pathway            | 10/2279 | 113/18866 | 0.8892811 | 0.9276526 | 0.839373  | 10 | CLEC4C/MUC12/MUC20/BCL10/PSMF1/CREBBP/PSMB7/RELA/FBXW11/PSMD13                                                                                                          |

|                    |            |                                                     |         |           |           |           |           |    |                                                                                                                                                                                                                   |
|--------------------|------------|-----------------------------------------------------|---------|-----------|-----------|-----------|-----------|----|-------------------------------------------------------------------------------------------------------------------------------------------------------------------------------------------------------------------|
| Biological Process | GO:0003002 | regionalization                                     | 36/2279 | 355/18866 | 0.8897126 | 0.9280008 | 0.8396881 | 36 | NRP2/LRP5L/SKI/CHSY1/SMAD3/PKD1L1/SUFU/ZEB2/HIPK2/ZBTB16/DLL1/RBPJ/MIB1/PCSK6/WNT11/PAX2/FGFR1/PAX7/DSCAML1/RARG/BMP1B/IFT140/HOXA9/TTC21B/NOTCH1/MEF2C/TMED2/HHEX/SSBP3/ALDH1A2/NODAL/HES3/OTX2/NTF4/HOXB7/GRSF1 |
| Biological Process | GO:0016064 | immunoglobulin mediated immune response             | 22/2279 | 227/18866 | 0.8902246 | 0.9284329 | 0.8400791 | 22 | IL10/CD55/INPP5D/TNF/IGHV6-1/CD226/PTPN6/CLU/UNG/TGFB1/C1S/PTPRC/BCL10/POU2F2/TP53BP1/ERCC1/TNFSF13/C1QB/BCL3/PAXIP1/C1RL/NSD2                                                                                    |
| Biological Process | GO:0070507 | regulation of microtubule cytoskeleton organization | 18/2279 | 190/18866 | 0.8918481 | 0.930024  | 0.8415188 | 18 | TBCD/DCTN1/RAE1/RCC1/DYNC1H1/NAV3/POC1A/BICD2/TACC3/NUMA1/MAP1A/ARHGEF2/CYLD/SPAG5/MARK2/SPEF1/PRKAA1/CEP295NL                                                                                                    |
| Biological Process | GO:0003401 | axis elongation                                     | 2/2279  | 30/18866  | 0.8925253 | 0.9302198 | 0.8416959 | 2  | WNT11/RDH10                                                                                                                                                                                                       |
| Biological Process | GO:0016056 | rhodopsin mediated signaling pathway                | 2/2279  | 30/18866  | 0.8925253 | 0.9302198 | 0.8416959 | 2  | PDE6A/GRK7                                                                                                                                                                                                        |
| Biological Process | GO:0043457 | regulation of cellular respiration                  | 2/2279  | 30/18866  | 0.8925253 | 0.9302198 | 0.8416959 | 2  | CBFA2T3/PRDM16                                                                                                                                                                                                    |
| Biological Process | GO:0062125 | regulation of mitochondrial gene expression         | 2/2279  | 30/18866  | 0.8925253 | 0.9302198 | 0.8416959 | 2  | MTG2/PRKAA1                                                                                                                                                                                                       |
| Biological Process | GO:0071711 | basement membrane organization                      | 2/2279  | 30/18866  | 0.8925253 | 0.9302198 | 0.8416959 | 2  | SPINT2/LAMB3                                                                                                                                                                                                      |
| Biological Process | GO:0015844 | monoamine transport                                 | 7/2279  | 84/18866  | 0.8947594 | 0.9324459 | 0.8437101 | 7  | NISCH/ITGB3/P2RX1/SYT17/DTNBP1/GRK2/PRKN                                                                                                                                                                          |

|                    |            |                                                             |         |           |           |           |           |    |                                                                                                                                                                                                                                                                |
|--------------------|------------|-------------------------------------------------------------|---------|-----------|-----------|-----------|-----------|----|----------------------------------------------------------------------------------------------------------------------------------------------------------------------------------------------------------------------------------------------------------------|
| Biological Process | GO:0000375 | RNA splicing, via transesterification reactions             | 40/2279 | 393/18866 | 0.8960606 | 0.9336994 | 0.8448444 | 40 | HNRNPUL1/RBM19/FIP1L1/LSM1/CPSF3/SNRPD3/SF3B3/SRPK2/POLR2F/PCBP4/PABPN1/SF1/LSM7/PRPF8/DAZAP1/SFSWAP/CELF2/NOL3/CELF1/SNRNP35/SNUPN/DHX16/USP49/CTNNB1/DDX41/RBFOX3/PRPF6/PRPF40B/NSRP1/RBM15B/CHERP/PLRG1/SRRM2/CPSF4/ZCCHC8/SYNERIP/RALY/CDK13/GEMIN4/TFIP11 |
| Biological Process | GO:0032210 | regulation of telomere maintenance via telomerase           | 4/2279  | 53/18866  | 0.8968965 | 0.9341768 | 0.8452764 | 4  | TNKS/HMBOX1/SMG6/CCT6A                                                                                                                                                                                                                                         |
| Biological Process | GO:0043331 | response to dsRNA                                           | 4/2279  | 53/18866  | 0.8968965 | 0.9341768 | 0.8452764 | 4  | COLEC12/FLOT1/PELI1/STING1                                                                                                                                                                                                                                     |
| Biological Process | GO:0019985 | translesion synthesis                                       | 3/2279  | 42/18866  | 0.8970103 | 0.9341768 | 0.8452764 | 3  | POLD3/PARP10/POLI                                                                                                                                                                                                                                              |
| Biological Process | GO:0033048 | negative regulation of mitotic sister chromatid segregation | 3/2279  | 42/18866  | 0.8970103 | 0.9341768 | 0.8452764 | 3  | MAD1L1/TNKS/PCID2                                                                                                                                                                                                                                              |
| Biological Process | GO:1900371 | regulation of purine nucleotide biosynthetic process        | 3/2279  | 42/18866  | 0.8970103 | 0.9341768 | 0.8452764 | 3  | RCVRN/ENO1/SPHK2                                                                                                                                                                                                                                               |
| Biological Process | GO:0000956 | nuclear-transcribed mRNA catabolic process                  | 20/2279 | 210/18866 | 0.8974791 | 0.9345626 | 0.8456254 | 20 | LSM1/EXOSC2/TNRC6B/AGO1/CSDE1/SAMD4A/SMG7/CTIF/AGO2/EDC3/LSM7/CPEB3/SMG6/PPP2R1A/NBAS/DIS3L2/SECISBP2/RPL23A/EIF4G1/PCID2                                                                                                                                      |
| Biological Process | GO:0002920 | regulation of humoral immune response                       | 12/2279 | 134/18866 | 0.8979979 | 0.9350004 | 0.8460215 | 12 | C3AR1/CD55/TNF/C5AR2/PTPN6/CLU/PHB/CD59/C1S/PTPRC/CPB2/C1QB                                                                                                                                                                                                    |
| Biological Process | GO:0046686 | response to cadmium ion                                     | 5/2279  | 64/18866  | 0.8994438 | 0.9362636 | 0.8471645 | 5  | GSN/MTF1/CAT/NPC1/ERCC1                                                                                                                                                                                                                                        |

|                    |            |                                                              |         |           |           |           |           |    |                                                                                                                                     |
|--------------------|------------|--------------------------------------------------------------|---------|-----------|-----------|-----------|-----------|----|-------------------------------------------------------------------------------------------------------------------------------------|
| Biological Process | GO:0006333 | chromatin assembly or disassembly                            | 21/2279 | 220/18866 | 0.9002211 | 0.9362636 | 0.8471645 | 21 | BAZ1B/UBN1/CABIN1/PADI2/SMYD3/HDAC1/ATF7IP/MCM2/RSF1/MTA2/SMARCD1/SMARCD2/DNMT1/CENPM/ZNF1/RUVBL1/CHAF1A/PARP10/BRD2/MACROH2A2/H3C1 |
| Biological Process | GO:0000245 | spliceosomal complex assembly                                | 7/2279  | 85/18866  | 0.9013954 | 0.9362636 | 0.8471645 | 7  | SRPK2/SF1/SFSWAP/CELF2/NOL3/CELF1/PRPF6                                                                                             |
| Biological Process | GO:0031110 | regulation of microtubule polymerization or depolymerization | 7/2279  | 85/18866  | 0.9013954 | 0.9362636 | 0.8471645 | 7  | TBCD/DCTN1/NAV3/NUMA1/MAP1A/ARHGEF2/SPEF1                                                                                           |
| Biological Process | GO:0001522 | pseudouridine synthesis                                      | 1/2279  | 18/18866  | 0.9015762 | 0.9362636 | 0.8471645 | 1  | PUS7                                                                                                                                |
| Biological Process | GO:0006740 | NADPH regeneration                                           | 1/2279  | 18/18866  | 0.9015762 | 0.9362636 | 0.8471645 | 1  | PGAM1                                                                                                                               |
| Biological Process | GO:0006883 | cellular sodium ion homeostasis                              | 1/2279  | 18/18866  | 0.9015762 | 0.9362636 | 0.8471645 | 1  | SLC8A1                                                                                                                              |
| Biological Process | GO:0010839 | negative regulation of keratinocyte proliferation            | 1/2279  | 18/18866  | 0.9015762 | 0.9362636 | 0.8471645 | 1  | VDR                                                                                                                                 |
| Biological Process | GO:0032048 | cardiolipin metabolic process                                | 1/2279  | 18/18866  | 0.9015762 | 0.9362636 | 0.8471645 | 1  | PGS1                                                                                                                                |
| Biological Process | GO:0036148 | phosphatidylglycerol acyl-chain remodeling                   | 1/2279  | 18/18866  | 0.9015762 | 0.9362636 | 0.8471645 | 1  | LPCAT1                                                                                                                              |

|                    |            |                                                 |        |          |           |           |           |   |         |
|--------------------|------------|-------------------------------------------------|--------|----------|-----------|-----------|-----------|---|---------|
| Biological Process | GO:0042136 | neurotransmitter biosynthetic process           | 1/2279 | 18/18866 | 0.9015762 | 0.9362636 | 0.8471645 | 1 | SLC44A4 |
| Biological Process | GO:0045187 | regulation of circadian sleep/wake cycle, sleep | 1/2279 | 18/18866 | 0.9015762 | 0.9362636 | 0.8471645 | 1 | GHRL    |
| Biological Process | GO:0046112 | nucleobase biosynthetic process                 | 1/2279 | 18/18866 | 0.9015762 | 0.9362636 | 0.8471645 | 1 | DHODH   |
| Biological Process | GO:0048268 | clathrin coat assembly                          | 1/2279 | 18/18866 | 0.9015762 | 0.9362636 | 0.8471645 | 1 | EPS15   |
| Biological Process | GO:0048557 | embryonic digestive tract morphogenesis         | 1/2279 | 18/18866 | 0.9015762 | 0.9362636 | 0.8471645 | 1 | HLX     |
| Biological Process | GO:0052695 | cellular glucuronidation                        | 1/2279 | 18/18866 | 0.9015762 | 0.9362636 | 0.8471645 | 1 | PRKCE   |
| Biological Process | GO:0060004 | reflex                                          | 1/2279 | 18/18866 | 0.9015762 | 0.9362636 | 0.8471645 | 1 | TMC1    |
| Biological Process | GO:0060046 | regulation of acrosome reaction                 | 1/2279 | 18/18866 | 0.9015762 | 0.9362636 | 0.8471645 | 1 | PLCB1   |
| Biological Process | GO:0071318 | cellular response to ATP                        | 1/2279 | 18/18866 | 0.9015762 | 0.9362636 | 0.8471645 | 1 | SSH1    |



|                    |            |                                                         |        |          |           |           |           |   |               |
|--------------------|------------|---------------------------------------------------------|--------|----------|-----------|-----------|-----------|---|---------------|
| Biological Process | GO:0071605 | monocyte chemotactic protein-1 production               | 1/2279 | 18/18866 | 0.9015762 | 0.9362636 | 0.8471645 | 1 | C1QTNF3       |
| Biological Process | GO:0071637 | regulation of monocyte chemotactic protein-1 production | 1/2279 | 18/18866 | 0.9015762 | 0.9362636 | 0.8471645 | 1 | C1QTNF3       |
| Biological Process | GO:0072079 | nephron tubule formation                                | 1/2279 | 18/18866 | 0.9015762 | 0.9362636 | 0.8471645 | 1 | PAX2          |
| Biological Process | GO:0090493 | catecholamine uptake                                    | 1/2279 | 18/18866 | 0.9015762 | 0.9362636 | 0.8471645 | 1 | PRKN          |
| Biological Process | GO:0150078 | positive regulation of neuroinflammatory response       | 1/2279 | 18/18866 | 0.9015762 | 0.9362636 | 0.8471645 | 1 | TNF           |
| Biological Process | GO:0002675 | positive regulation of acute inflammatory response      | 2/2279 | 31/18866 | 0.9029891 | 0.9370139 | 0.8478434 | 2 | TNF/F12       |
| Biological Process | GO:0007143 | female meiotic nuclear division                         | 2/2279 | 31/18866 | 0.9029891 | 0.9370139 | 0.8478434 | 2 | MEIOB/PPP2R1A |
| Biological Process | GO:0021772 | olfactory bulb development                              | 2/2279 | 31/18866 | 0.9029891 | 0.9370139 | 0.8478434 | 2 | SKI/CSF1R     |
| Biological Process | GO:0036257 | multivesicular body organization                        | 2/2279 | 31/18866 | 0.9029891 | 0.9370139 | 0.8478434 | 2 | RAB27A/MVB12A |

|                    |            |                                                                                 |         |           |           |           |           |    |                                                                                      |
|--------------------|------------|---------------------------------------------------------------------------------|---------|-----------|-----------|-----------|-----------|----|--------------------------------------------------------------------------------------|
| Biological Process | GO:0039528 | cytoplasmic pattern recognition receptor signaling pathway in response to virus | 2/2279  | 31/18866  | 0.9029891 | 0.9370139 | 0.8478434 | 2  | PHB/SEC14L1                                                                          |
| Biological Process | GO:0060292 | long-term synaptic depression                                                   | 2/2279  | 31/18866  | 0.9029891 | 0.9370139 | 0.8478434 | 2  | SORCS2/SHANK2                                                                        |
| Biological Process | GO:0090075 | relaxation of muscle                                                            | 2/2279  | 31/18866  | 0.9029891 | 0.9370139 | 0.8478434 | 2  | PDE4D/SLC8A1                                                                         |
| Biological Process | GO:0006414 | translational elongation                                                        | 12/2279 | 135/18866 | 0.9032541 | 0.9371866 | 0.8479997 | 12 | TRNAU1AP/MRPL3/MRPL38/CPEB3/MRPS21/MRPS26/ZNF598/MRPL28/SECISBP2/AURKAIP1/EEF1D/SHFL |
| Biological Process | GO:0000413 | protein peptidyl-prolyl isomerization                                           | 3/2279  | 43/18866  | 0.9058109 | 0.939224  | 0.8498432 | 3  | FKBP5/AIP/PTPA                                                                       |
| Biological Process | GO:0030808 | regulation of nucleotide biosynthetic process                                   | 3/2279  | 43/18866  | 0.9058109 | 0.939224  | 0.8498432 | 3  | RCVRN/ENO1/SPHK2                                                                     |
| Biological Process | GO:0034080 | CENP-A containing nucleosome assembly                                           | 3/2279  | 43/18866  | 0.9058109 | 0.939224  | 0.8498432 | 3  | RSF1/CENPM/RUVBL1                                                                    |
| Biological Process | GO:0040019 | positive regulation of embryonic development                                    | 3/2279  | 43/18866  | 0.9058109 | 0.939224  | 0.8498432 | 3  | RBM19/PLCB1/OTX2                                                                     |
| Biological Process | GO:0045823 | positive regulation of heart contraction                                        | 3/2279  | 43/18866  | 0.9058109 | 0.939224  | 0.8498432 | 3  | PDE4D/NOS1AP/KCNQ1                                                                   |

|                    |            |                                                      |         |           |           |           |           |    |                                                                                                                                                                                                                          |
|--------------------|------------|------------------------------------------------------|---------|-----------|-----------|-----------|-----------|----|--------------------------------------------------------------------------------------------------------------------------------------------------------------------------------------------------------------------------|
| Biological Process | GO:0061641 | CENP-A containing chromatin organization             | 3/2279  | 43/18866  | 0.9058109 | 0.939224  | 0.8498432 | 3  | RSF1/CENPM/RUVBL1                                                                                                                                                                                                        |
| Biological Process | GO:0030317 | flagellated sperm motility                           | 8/2279  | 96/18866  | 0.9066106 | 0.9396934 | 0.850268  | 8  | PLTP/RNASE10/DEFB1/IQCG/ARMC2/CCNYL1/TLL1/NPHP4                                                                                                                                                                          |
| Biological Process | GO:0097722 | sperm motility                                       | 8/2279  | 96/18866  | 0.9066106 | 0.9396934 | 0.850268  | 8  | PLTP/RNASE10/DEFB1/IQCG/ARMC2/CCNYL1/TLL1/NPHP4                                                                                                                                                                          |
| Biological Process | GO:0010257 | NADH dehydrogenase complex assembly                  | 5/2279  | 65/18866  | 0.9066593 | 0.9396934 | 0.850268  | 5  | NDUFAF6/NDUFS2/NDUFS8/NDUFB6/DMAC1                                                                                                                                                                                       |
| Biological Process | GO:0032981 | mitochondrial respiratory chain complex I assembly   | 5/2279  | 65/18866  | 0.9066593 | 0.9396934 | 0.850268  | 5  | NDUFAF6/NDUFS2/NDUFS8/NDUFB6/DMAC1                                                                                                                                                                                       |
| Biological Process | GO:0090150 | establishment of protein localization to membrane    | 34/2279 | 342/18866 | 0.9074261 | 0.9403856 | 0.8508943 | 34 | KCNE1/TFDP1/ZDHHC18/YWHAH/ITGB1BP1/BMF/ZDHHC14/KIF13A/COLQ/RAB31/RABGEF1/ZDHHC2/AKAP5/ZDHHC7/VAMP5/CSK/ZDHHC1/GORASP2/PRKCI/PEX26/ITGB2/NPC1/RILPL1/YWHAZ/MICALL1/FIS1/BCL2/NACAD/TP53BP2/MYO1C/MIEF1/RPL23A/YWHAQ/PDZK1 |
| Biological Process | GO:0097756 | negative regulation of blood vessel diameter         | 7/2279  | 86/18866  | 0.9076716 | 0.9405375 | 0.8510317 | 7  | SLC8A1/GJA5/HRH1/PER2/P2RX1/F2R/AGTR1                                                                                                                                                                                    |
| Biological Process | GO:0050680 | negative regulation of epithelial cell proliferation | 16/2279 | 175/18866 | 0.9098781 | 0.942721  | 0.8530074 | 16 | PPARG/BRCA2/VDR/TNF/THBS1/MIR24-2/FLT1/TGFB1/NF1/MTSS1/GHRL/VASH1/RB1/MEF2C/CPB2/RUNX3                                                                                                                                   |
| Biological Process | GO:0022029 | telencephalon cell migration                         | 4/2279  | 55/18866  | 0.9123068 | 0.9442875 | 0.8544248 | 4  | RTN4/DISC1/ZMIZ1/NDEL1                                                                                                                                                                                                   |

|                    |            |                                                   |        |          |           |           |           |   |                           |
|--------------------|------------|---------------------------------------------------|--------|----------|-----------|-----------|-----------|---|---------------------------|
| Biological Process | GO:0042304 | regulation of fatty acid biosynthetic process     | 4/2279 | 55/18866 | 0.9123068 | 0.9442875 | 0.8544248 | 4 | PRKAG2/NR1H2/WDTC1/ACADVL |
| Biological Process | GO:0050433 | regulation of catecholamine secretion             | 4/2279 | 55/18866 | 0.9123068 | 0.9442875 | 0.8544248 | 4 | SYT17/DTNBP1/GRK2/PRKN    |
| Biological Process | GO:0006335 | DNA replication-dependent nucleosome assembly     | 2/2279 | 32/18866 | 0.9124944 | 0.9442875 | 0.8544248 | 2 | CHAF1A/H3C1               |
| Biological Process | GO:0008210 | estrogen metabolic process                        | 2/2279 | 32/18866 | 0.9124944 | 0.9442875 | 0.8544248 | 2 | HSD17B2/COMT              |
| Biological Process | GO:0034723 | DNA replication-dependent nucleosome organization | 2/2279 | 32/18866 | 0.9124944 | 0.9442875 | 0.8544248 | 2 | CHAF1A/H3C1               |
| Biological Process | GO:0038128 | ERBB2 signaling pathway                           | 2/2279 | 32/18866 | 0.9124944 | 0.9442875 | 0.8544248 | 2 | PIK3R1/PRKCA              |
| Biological Process | GO:0051085 | chaperone cofactor-dependent protein refolding    | 2/2279 | 32/18866 | 0.9124944 | 0.9442875 | 0.8544248 | 2 | DNAJB13/TOR1B             |
| Biological Process | GO:0071295 | cellular response to vitamin                      | 2/2279 | 32/18866 | 0.9124944 | 0.9442875 | 0.8544248 | 2 | PPARG/VDR                 |
| Biological Process | GO:1901976 | regulation of cell cycle checkpoint               | 2/2279 | 32/18866 | 0.9124944 | 0.9442875 | 0.8544248 | 2 | CHEK2/PCID2               |

|                    |            |                                                                    |        |          |           |           |           |   |                           |
|--------------------|------------|--------------------------------------------------------------------|--------|----------|-----------|-----------|-----------|---|---------------------------|
| Biological Process | GO:1901607 | alpha-amino acid biosynthetic process                              | 5/2279 | 66/18866 | 0.9134179 | 0.9442875 | 0.8544248 | 5 | GGT1/CBS/AGXT/MTHFD1/ADI1 |
| Biological Process | GO:0002862 | negative regulation of inflammatory response to antigenic stimulus | 1/2279 | 19/18866 | 0.9134771 | 0.9442875 | 0.8544248 | 1 | IL10                      |
| Biological Process | GO:0007039 | protein catabolic process in the vacuole                           | 1/2279 | 19/18866 | 0.9134771 | 0.9442875 | 0.8544248 | 1 | MGAT3                     |
| Biological Process | GO:0007625 | grooming behavior                                                  | 1/2279 | 19/18866 | 0.9134771 | 0.9442875 | 0.8544248 | 1 | NRXN1                     |
| Biological Process | GO:0009148 | pyrimidine nucleoside triphosphate biosynthetic process            | 1/2279 | 19/18866 | 0.9134771 | 0.9442875 | 0.8544248 | 1 | UCK2                      |
| Biological Process | GO:0031643 | positive regulation of myelination                                 | 1/2279 | 19/18866 | 0.9134771 | 0.9442875 | 0.8544248 | 1 | TNFRSF1B                  |
| Biological Process | GO:0035089 | establishment of apical/basal cell polarity                        | 1/2279 | 19/18866 | 0.9134771 | 0.9442875 | 0.8544248 | 1 | PRKCI                     |
| Biological Process | GO:0036158 | outer dynein arm assembly                                          | 1/2279 | 19/18866 | 0.9134771 | 0.9442875 | 0.8544248 | 1 | DNAI2                     |
| Biological Process | GO:0039535 | regulation of RIG-I signaling pathway                              | 1/2279 | 19/18866 | 0.9134771 | 0.9442875 | 0.8544248 | 1 | SEC14L1                   |

|                    |            |                                                                                      |         |           |           |           |           |    |  |                                                                                                                                                                                                                                                           |
|--------------------|------------|--------------------------------------------------------------------------------------|---------|-----------|-----------|-----------|-----------|----|--|-----------------------------------------------------------------------------------------------------------------------------------------------------------------------------------------------------------------------------------------------------------|
| Biological Process | GO:0060602 | branch elongation of an epithelium                                                   | 1/2279  | 19/18866  | 0.9134771 | 0.9442875 | 0.8544248 | 1  |  | RDH10                                                                                                                                                                                                                                                     |
| Biological Process | GO:0098719 | sodium ion import across plasma membrane                                             | 1/2279  | 19/18866  | 0.9134771 | 0.9442875 | 0.8544248 | 1  |  | SLC8A1                                                                                                                                                                                                                                                    |
| Biological Process | GO:0009060 | aerobic respiration                                                                  | 7/2279  | 87/18866  | 0.9136024 | 0.9443142 | 0.854449  | 7  |  | CBFA2T3/DHTKD1/OGDH/NDUFS8/CAT/SDHD/SIRT3                                                                                                                                                                                                                 |
| Biological Process | GO:0010463 | mesenchymal cell proliferation                                                       | 3/2279  | 44/18866  | 0.9139247 | 0.9443391 | 0.8544716 | 3  |  | TGFBR2/WNT11/FGFR1                                                                                                                                                                                                                                        |
| Biological Process | GO:0033046 | negative regulation of sister chromatid segregation                                  | 3/2279  | 44/18866  | 0.9139247 | 0.9443391 | 0.8544716 | 3  |  | MAD1L1/TNKS/PCID2                                                                                                                                                                                                                                         |
| Biological Process | GO:0042181 | ketone biosynthetic process                                                          | 3/2279  | 44/18866  | 0.9139247 | 0.9443391 | 0.8544716 | 3  |  | DGKQ/COQ4/COQ8B                                                                                                                                                                                                                                           |
| Biological Process | GO:0000377 | RNA splicing, via transesterification reactions with bulged adenosine as nucleophile | 39/2279 | 390/18866 | 0.9146682 | 0.9449018 | 0.8549807 | 39 |  | HNRNPUL1/RBM19/FIP1L1/CPSF3/SNRPD3/SF3B3/SRPK2/POLR2F/PCBP4/PABPN1/SF1/LSM7/PRPF8/DAZAP1/SFSWAP/CELF2/NOL3/CELF1/SNRNP35/SNUPN/DHX16/USP49/CTNBL1/DDX41/RBFOX3/PRPF6/PRPF40B/NSRP1/RBM15B/CHERP/PLRG1/SRRM2/CPSF4/ZCCHC8/SYNCRIP/RALY/CDK13/GEMIN4/TFIP11 |
| Biological Process | GO:0000398 | mRNA splicing, via spliceosome                                                       | 39/2279 | 390/18866 | 0.9146682 | 0.9449018 | 0.8549807 | 39 |  | HNRNPUL1/RBM19/FIP1L1/CPSF3/SNRPD3/SF3B3/SRPK2/POLR2F/PCBP4/PABPN1/SF1/LSM7/PRPF8/DAZAP1/SFSWAP/CELF2/NOL3/CELF1/SNRNP35/SNUPN/DHX16/USP49/CTNBL1/DDX41/RBFOX3/PRPF6/PRPF40B/NSRP1/RBM15B/CHERP/PLRG1/SRRM2/CPSF4/ZCCHC8/SYNCRIP/RALY/CDK13/GEMIN4/TFIP11 |
| Biological Process | GO:0033559 | unsaturated fatty acid metabolic process                                             | 10/2279 | 118/18866 | 0.9168206 | 0.9470224 | 0.8568995 | 10 |  | MGLL/ACSL1/ABHD16A/TNFRSF1A/CYP4F3/EPHX1/SCD/LYPLA2/ZADH2/PRXL2B                                                                                                                                                                                          |

|                    |            |                                               |         |           |           |           |           |    |                                                                                                                                                                                                            |
|--------------------|------------|-----------------------------------------------|---------|-----------|-----------|-----------|-----------|----|------------------------------------------------------------------------------------------------------------------------------------------------------------------------------------------------------------|
| Biological Process | GO:0032890 | regulation of organic acid transport          | 5/2279  | 67/18866  | 0.9197424 | 0.9499372 | 0.8595369 | 5  | MAP2K6/THBS1/SLC43A2/PER2/SLC43A1                                                                                                                                                                          |
| Biological Process | GO:0003352 | regulation of cilium movement                 | 2/2279  | 33/18866  | 0.9211201 | 0.9509467 | 0.8604503 | 2  | RNASE10/DEFB1                                                                                                                                                                                              |
| Biological Process | GO:0010039 | response to iron ion                          | 2/2279  | 33/18866  | 0.9211201 | 0.9509467 | 0.8604503 | 2  | SLC11A2/BCL2                                                                                                                                                                                               |
| Biological Process | GO:0021988 | olfactory lobe development                    | 2/2279  | 33/18866  | 0.9211201 | 0.9509467 | 0.8604503 | 2  | SKI/CSF1R                                                                                                                                                                                                  |
| Biological Process | GO:0050685 | positive regulation of mRNA processing        | 2/2279  | 33/18866  | 0.9211201 | 0.9509467 | 0.8604503 | 2  | CPEB3/DAZAP1                                                                                                                                                                                               |
| Biological Process | GO:0051985 | negative regulation of chromosome segregation | 3/2279  | 45/18866  | 0.921397  | 0.9509472 | 0.8604508 | 3  | MAD1L1/TNKS/PCID2                                                                                                                                                                                          |
| Biological Process | GO:2001222 | regulation of neuron migration                | 3/2279  | 45/18866  | 0.921397  | 0.9509472 | 0.8604508 | 3  | RAPGEF2/ARHGEF2/UNC5D                                                                                                                                                                                      |
| Biological Process | GO:0009913 | epidermal cell differentiation                | 36/2279 | 365/18866 | 0.9214209 | 0.9509472 | 0.8604508 | 36 | CSTA/RUNX1/VDR/TGM5/KRT17/JUP/PKP1/SLC44A4/DLL1/RBPJ/PCSK6/HDAC1/CDH3/FGFR1/OVOL1/PRKCH/PERP/GRHL2/NUMA1/BCR/CNFN/KLF7/SGPP1/KRTAP5-9/NOTCH1/AQP3/FA2H/TMC1/TGM3/KRT23/KAZN/ZBED2/KRT7/ERCC2/PPL/MACROH2A2 |
| Biological Process | GO:0098781 | ncRNA transcription                           | 9/2279  | 109/18866 | 0.9219126 | 0.9513514 | 0.8608165 | 9  | POLR2F/ELL2/ZC3H8/BRF1/POU2F2/PIH1D1/RPRD1B/MARS1/MACROH2A2                                                                                                                                                |

|                    |            |                                                               |        |          |           |           |           |   |        |
|--------------------|------------|---------------------------------------------------------------|--------|----------|-----------|-----------|-----------|---|--------|
| Biological Process | GO:0002418 | immune response to tumor cell                                 | 1/2279 | 20/18866 | 0.9239395 | 0.9518922 | 0.8613058 | 1 | CD226  |
| Biological Process | GO:0003085 | negative regulation of systemic arterial blood pressure       | 1/2279 | 20/18866 | 0.9239395 | 0.9518922 | 0.8613058 | 1 | KCNK6  |
| Biological Process | GO:0003215 | cardiac right ventricle morphogenesis                         | 1/2279 | 20/18866 | 0.9239395 | 0.9518922 | 0.8613058 | 1 | NOTCH1 |
| Biological Process | GO:0006488 | dolichol-linked oligosaccharide biosynthetic process          | 1/2279 | 20/18866 | 0.9239395 | 0.9518922 | 0.8613058 | 1 | DPAGT1 |
| Biological Process | GO:0007620 | copulation                                                    | 1/2279 | 20/18866 | 0.9239395 | 0.9518922 | 0.8613058 | 1 | P2RX1  |
| Biological Process | GO:0015919 | peroxisomal membrane transport                                | 1/2279 | 20/18866 | 0.9239395 | 0.9518922 | 0.8613058 | 1 | PEX26  |
| Biological Process | GO:0023019 | signal transduction involved in regulation of gene expression | 1/2279 | 20/18866 | 0.9239395 | 0.9518922 | 0.8613058 | 1 | SMAD3  |
| Biological Process | GO:0032303 | regulation of icosanoid secretion                             | 1/2279 | 20/18866 | 0.9239395 | 0.9518922 | 0.8613058 | 1 | MAP2K6 |
| Biological Process | GO:0032816 | positive regulation of natural killer cell activation         | 1/2279 | 20/18866 | 0.9239395 | 0.9518922 | 0.8613058 | 1 | HLA-F  |



|                    |            |                                                                        |        |          |           |           |           |   |                         |
|--------------------|------------|------------------------------------------------------------------------|--------|----------|-----------|-----------|-----------|---|-------------------------|
| Biological Process | GO:0033141 | positive regulation of peptidyl-serine phosphorylation of STAT protein | 1/2279 | 20/18866 | 0.9239395 | 0.9518922 | 0.8613058 | 1 | LIF                     |
| Biological Process | GO:0036303 | lymph vessel morphogenesis                                             | 1/2279 | 20/18866 | 0.9239395 | 0.9518922 | 0.8613058 | 1 | VASH1                   |
| Biological Process | GO:0042474 | middle ear morphogenesis                                               | 1/2279 | 20/18866 | 0.9239395 | 0.9518922 | 0.8613058 | 1 | FGFR1                   |
| Biological Process | GO:1901881 | positive regulation of protein depolymerization                        | 1/2279 | 20/18866 | 0.9239395 | 0.9518922 | 0.8613058 | 1 | WDR1                    |
| Biological Process | GO:1902644 | tertiary alcohol metabolic process                                     | 1/2279 | 20/18866 | 0.9239395 | 0.9518922 | 0.8613058 | 1 | DGKQ                    |
| Biological Process | GO:2000193 | positive regulation of fatty acid transport                            | 1/2279 | 20/18866 | 0.9239395 | 0.9518922 | 0.8613058 | 1 | MAP2K6                  |
| Biological Process | GO:0006576 | cellular biogenic amine metabolic process                              | 4/2279 | 57/18866 | 0.9256296 | 0.9532458 | 0.8625307 | 4 | ODC1/DDC/SAT2/HNMT      |
| Biological Process | GO:0042743 | hydrogen peroxide metabolic process                                    | 4/2279 | 57/18866 | 0.9256296 | 0.9532458 | 0.8625307 | 4 | MPO/LPO/HBB/CAT         |
| Biological Process | GO:0075733 | intracellular transport of virus                                       | 4/2279 | 57/18866 | 0.9256296 | 0.9532458 | 0.8625307 | 4 | RAE1/NUP93/SEC13/MVB12A |

|                    |            |                                              |         |           |           |           |           |    |                                                                                                                                                                |
|--------------------|------------|----------------------------------------------|---------|-----------|-----------|-----------|-----------|----|----------------------------------------------------------------------------------------------------------------------------------------------------------------|
| Biological Process | GO:0042446 | hormone biosynthetic process                 | 5/2279  | 68/18866  | 0.9256548 | 0.9532458 | 0.8625307 | 5  | HSD17B2/TG/FDX1/DGKQ/POR                                                                                                                                       |
| Biological Process | GO:0043330 | response to exogenous dsRNA                  | 3/2279  | 46/18866  | 0.9282712 | 0.9553863 | 0.8644674 | 3  | COLEC12/FLOT1/STING1                                                                                                                                           |
| Biological Process | GO:0007281 | germ cell development                        | 26/2279 | 275/18866 | 0.9288892 | 0.9553863 | 0.8644674 | 26 | ACRBP/HEXB/MOV10L1/BRCA2/SPAG6/ZBTB16/CDYL/SMARCA2/KMT2D/RARA/DEFB1/JAM3/IQCG/BMPR1B/PPP2R1A/CELF1/BCL2/DMC1/ARMC2/NPPC/FSCN3/ERCC1/BCL2L1/FBXW11/TTL1/MFSD14A |
| Biological Process | GO:0000038 | very long-chain fatty acid metabolic process | 2/2279  | 34/18866  | 0.9289399 | 0.9553863 | 0.8644674 | 2  | ACSL1/ACOX2                                                                                                                                                    |
| Biological Process | GO:0007094 | mitotic spindle assembly checkpoint          | 2/2279  | 34/18866  | 0.9289399 | 0.9553863 | 0.8644674 | 2  | MAD1L1/PCID2                                                                                                                                                   |
| Biological Process | GO:0019228 | neuronal action potential                    | 2/2279  | 34/18866  | 0.9289399 | 0.9553863 | 0.8644674 | 2  | SCN1A/P2RX1                                                                                                                                                    |
| Biological Process | GO:0030431 | sleep                                        | 2/2279  | 34/18866  | 0.9289399 | 0.9553863 | 0.8644674 | 2  | GHRL/SLC29A1                                                                                                                                                   |
| Biological Process | GO:0031577 | spindle checkpoint                           | 2/2279  | 34/18866  | 0.9289399 | 0.9553863 | 0.8644674 | 2  | MAD1L1/PCID2                                                                                                                                                   |
| Biological Process | GO:0035510 | DNA dealkylation                             | 2/2279  | 34/18866  | 0.9289399 | 0.9553863 | 0.8644674 | 2  | FTO/TET2                                                                                                                                                       |

|                    |            |                                                        |         |           |           |           |           |    |                                                                                                                                                                                                                                                                                                                            |                                                        |
|--------------------|------------|--------------------------------------------------------|---------|-----------|-----------|-----------|-----------|----|----------------------------------------------------------------------------------------------------------------------------------------------------------------------------------------------------------------------------------------------------------------------------------------------------------------------------|--------------------------------------------------------|
| Biological Process | GO:0042759 | long-chain fatty acid biosynthetic process             | 2/2279  | 34/18866  | 0.9289399 | 0.9553863 | 0.8644674 | 2  |                                                                                                                                                                                                                                                                                                                            | ACOT7/MYO5A                                            |
| Biological Process | GO:0071173 | spindle assembly checkpoint                            | 2/2279  | 34/18866  | 0.9289399 | 0.9553863 | 0.8644674 | 2  |                                                                                                                                                                                                                                                                                                                            | MAD1L1/PCID2                                           |
| Biological Process | GO:0071174 | mitotic spindle checkpoint                             | 2/2279  | 34/18866  | 0.9289399 | 0.9553863 | 0.8644674 | 2  |                                                                                                                                                                                                                                                                                                                            | MAD1L1/PCID2                                           |
| Biological Process | GO:0098664 | G protein-coupled serotonin receptor signaling pathway | 2/2279  | 34/18866  | 0.9289399 | 0.9553863 | 0.8644674 | 2  |                                                                                                                                                                                                                                                                                                                            | HRH1/CHRM2                                             |
| Biological Process | GO:0008380 | RNA splicing                                           | 49/2279 | 487/18866 | 0.930069  | 0.9564439 | 0.8654244 | 49 | HNRNPUL1/RBM19/FIP1L1/LSM1/ERN1/CPSF3/SNRPD3/SF3B3/PIK3R1/SRPK2/POLR2F/PCBP4/AHNAK/PRKRIP1/PABPN1/CLK3/SF1/LSM7/PRPF8/DAZAP1/SFSWAP/CELF2/PPP2R1A/NOL3/HNRNPLL/CELF1/SNRNP35/SNUPN/DHX16/USP49/CTNBL1/DDX41/RBFOX3/PRPF6/PRPF40B/NSRP1/RBM15B/CHERP/PLRG1/SRRM2/CPSF4/ZCCHC8/SYNCRIP/CLASRP/RALY/CDK13/GEMIN4/TFIP11/GRSF1 |                                                        |
| Biological Process | GO:0060294 | cilium movement involved in cell motility              | 9/2279  | 111/18866 | 0.931025  | 0.9573234 | 0.8662202 | 9  |                                                                                                                                                                                                                                                                                                                            | PLTP/RNASE10/DEFB1/IQCG/ARMC2/CCNYL1/TLL1/NPHP4/CFAP46 |
| Biological Process | GO:0001502 | cartilage condensation                                 | 1/2279  | 21/18866  | 0.9331373 | 0.9577334 | 0.8665912 | 1  |                                                                                                                                                                                                                                                                                                                            | BMP1B                                                  |
| Biological Process | GO:0009713 | catechol-containing compound biosynthetic process      | 1/2279  | 21/18866  | 0.9331373 | 0.9577334 | 0.8665912 | 1  |                                                                                                                                                                                                                                                                                                                            | DDC                                                    |
| Biological Process | GO:0014821 | phasic smooth muscle contraction                       | 1/2279  | 21/18866  | 0.9331373 | 0.9577334 | 0.8665912 | 1  |                                                                                                                                                                                                                                                                                                                            | GHRL                                                   |

|                    |            |                                                    |        |          |           |           |           |   |        |
|--------------------|------------|----------------------------------------------------|--------|----------|-----------|-----------|-----------|---|--------|
| Biological Process | GO:0016553 | base conversion or substitution editing            | 1/2279 | 21/18866 | 0.9331373 | 0.9577334 | 0.8665912 | 1 | RBM47  |
| Biological Process | GO:0030502 | negative regulation of bone mineralization         | 1/2279 | 21/18866 | 0.9331373 | 0.9577334 | 0.8665912 | 1 | RFLNA  |
| Biological Process | GO:0034471 | ncRNA 5'-end processing                            | 1/2279 | 21/18866 | 0.9331373 | 0.9577334 | 0.8665912 | 1 | NOP14  |
| Biological Process | GO:0039702 | viral budding via host ESCRT complex               | 1/2279 | 21/18866 | 0.9331373 | 0.9577334 | 0.8665912 | 1 | MVB12A |
| Biological Process | GO:0042276 | error-prone translesion synthesis                  | 1/2279 | 21/18866 | 0.9331373 | 0.9577334 | 0.8665912 | 1 | POLI   |
| Biological Process | GO:0042423 | catecholamine biosynthetic process                 | 1/2279 | 21/18866 | 0.9331373 | 0.9577334 | 0.8665912 | 1 | DDC    |
| Biological Process | GO:0043651 | linoleic acid metabolic process                    | 1/2279 | 21/18866 | 0.9331373 | 0.9577334 | 0.8665912 | 1 | ACSL1  |
| Biological Process | GO:0046827 | positive regulation of protein export from nucleus | 1/2279 | 21/18866 | 0.9331373 | 0.9577334 | 0.8665912 | 1 | TCF7L2 |
| Biological Process | GO:0060065 | uterus development                                 | 1/2279 | 21/18866 | 0.9331373 | 0.9577334 | 0.8665912 | 1 | HOXA9  |

|                    |            |                                                                    |         |           |           |           |           |    |                                                                                                                                                                                                                                          |                                                                      |
|--------------------|------------|--------------------------------------------------------------------|---------|-----------|-----------|-----------|-----------|----|------------------------------------------------------------------------------------------------------------------------------------------------------------------------------------------------------------------------------------------|----------------------------------------------------------------------|
| Biological Process | GO:0061162 | establishment of monopolar cell polarity                           | 1/2279  | 21/18866  | 0.9331373 | 0.9577334 | 0.8665912 | 1  |                                                                                                                                                                                                                                          | PRKCI                                                                |
| Biological Process | GO:0090370 | negative regulation of cholesterol efflux                          | 1/2279  | 21/18866  | 0.9331373 | 0.9577334 | 0.8665912 | 1  |                                                                                                                                                                                                                                          | MIR27A                                                               |
| Biological Process | GO:1903817 | negative regulation of voltage-gated potassium channel activity    | 1/2279  | 21/18866  | 0.9331373 | 0.9577334 | 0.8665912 | 1  |                                                                                                                                                                                                                                          | KCNE1                                                                |
| Biological Process | GO:2000678 | negative regulation of transcription regulatory region DNA binding | 1/2279  | 21/18866  | 0.9331373 | 0.9577334 | 0.8665912 | 1  |                                                                                                                                                                                                                                          | PER2                                                                 |
| Biological Process | GO:2000738 | positive regulation of stem cell differentiation                   | 1/2279  | 21/18866  | 0.9331373 | 0.9577334 | 0.8665912 | 1  |                                                                                                                                                                                                                                          | TACSTD2                                                              |
| Biological Process | GO:0043588 | skin development                                                   | 42/2279 | 425/18866 | 0.9339539 | 0.958463  | 0.8672514 | 42 | CSTA/ASPRV1/RUNX1/VDR/SUFU/TNF/TGM5/KRT17/JUP/PKP1/DLL1/RBPJ/PCSK6/HDAC1/CDH3/OVOL1/PRKCH/PERP/MYO5A/NF1/GRHL2/NUMA1/BCR/CNFN/GJB3/SGPP1/KRTAP5-9/BCL2/NOTCH1/AQP3/COL5A1/FA2H/TGM3/KRT23/KAZN/ZBED2/RELA/KRT7/INHBA/ERCC2/PPL/MACROH2A2 |                                                                      |
| Biological Process | GO:0007006 | mitochondrial membrane organization                                | 12/2279 | 142/18866 | 0.9340807 | 0.958463  | 0.8672514 | 12 |                                                                                                                                                                                                                                          | TFDP1/YWHAH/BMF/SPG7/HK2/IMMT/YWHAZ/BCL2/TP53BP2/BCL2L1/YWHAQ/ATP5PD |
| Biological Process | GO:0051952 | regulation of amine transport                                      | 7/2279  | 91/18866  | 0.9341509 | 0.958463  | 0.8672514 | 7  |                                                                                                                                                                                                                                          | SLC43A2/PER2/SYT17/SLC43A1/DTNBP1/GRK2/PRKN                          |
| Biological Process | GO:0031055 | chromatin remodeling at centromere                                 | 3/2279  | 47/18866  | 0.9345888 | 0.9588087 | 0.8675642 | 3  |                                                                                                                                                                                                                                          | RSF1/CENPM/RUVBL1                                                    |

|                    |            |                                                                              |         |           |           |           |           |    |                                                                                                                                           |
|--------------------|------------|------------------------------------------------------------------------------|---------|-----------|-----------|-----------|-----------|----|-------------------------------------------------------------------------------------------------------------------------------------------|
| Biological Process | GO:0007338 | single fertilization                                                         | 14/2279 | 162/18866 | 0.9347907 | 0.9589124 | 0.867658  | 14 | CECR2/CD9/HEXB/FOLR3/RNASE10/CLGN/IGSF8/LHFPL2/PLCB1/HOXA9/UBAP2L/UBE3A/UBXN8/IRAG2                                                       |
| Biological Process | GO:0039694 | viral RNA genome replication                                                 | 2/2279  | 35/18866  | 0.9360226 | 0.9598651 | 0.86852   | 2  | PHB/PI4KA                                                                                                                                 |
| Biological Process | GO:0051443 | positive regulation of ubiquitin-protein transferase activity                | 2/2279  | 35/18866  | 0.9360226 | 0.9598651 | 0.86852   | 2  | FZR1/AXIN1                                                                                                                                |
| Biological Process | GO:1900016 | negative regulation of cytokine production involved in inflammatory response | 2/2279  | 35/18866  | 0.9360226 | 0.9598651 | 0.86852   | 2  | MIR140/MEFV                                                                                                                               |
| Biological Process | GO:0033108 | mitochondrial respiratory chain complex assembly                             | 8/2279  | 102/18866 | 0.936545  | 0.9602972 | 0.868911  | 8  | COX19/NDUFAF6/NDUFS2/NDUFS8/NDUFB6/SDHAF1/SDHAF3/DMAC1                                                                                    |
| Biological Process | GO:0032886 | regulation of microtubule-based process                                      | 22/2279 | 240/18866 | 0.9368873 | 0.9604523 | 0.8690513 | 22 | TBCD/DCTN1/RAE1/RCC1/DYNC1H1/NAV3/RNASE10/POC1A/BICD2/CNIH2/DEFB1/TACC3/NUMA1/TTC21B/MAP1A/ARHGEF2/CYLD/SPAG5/MARK2/SPEF1/PRKAA1/CEP295NL |
| Biological Process | GO:0010833 | telomere maintenance via telomere lengthening                                | 6/2279  | 81/18866  | 0.9370155 | 0.9604523 | 0.8690513 | 6  | TNKS/HMBOX1/RTEL1/SMG6/SLX4/CCT6A                                                                                                         |
| Biological Process | GO:0006413 | translational initiation                                                     | 17/2279 | 192/18866 | 0.9370494 | 0.9604523 | 0.8690513 | 17 | RXRA/KLHL25/TNF/CCL5/NCK2/EIF2B5/LARP1/CTIF/AGO2/MIF4GD/EIF3M/COP55/PAIP1/BANK1/EIF3H/RPL23A/EIF4G1                                       |
| Biological Process | GO:0043486 | histone exchange                                                             | 4/2279  | 59/18866  | 0.9371006 | 0.9604523 | 0.8690513 | 4  | SRCAP/RSF1/CENPM/RUVBL1                                                                                                                   |

|                    |            |                                                                                        |         |           |           |           |           |    |                                                                                                                                                    |
|--------------------|------------|----------------------------------------------------------------------------------------|---------|-----------|-----------|-----------|-----------|----|----------------------------------------------------------------------------------------------------------------------------------------------------|
| Biological Process | GO:0042180 | cellular ketone metabolic process                                                      | 24/2279 | 260/18866 | 0.9395725 | 0.9628819 | 0.8712498 | 24 | PRKAG2/PPARG/NCOR2/MFSD2A/DHRS9/ODC1/COMT/CYP4F3/RDH10/DGKQ/AIFM2/NR1H2/SLC7A7/ACACB/PSMF1/PSMB7/PRKCE/SREBF1/WDTC1/CPT1A/COQ4/PSMD13/ACADVL/COQ8B |
| Biological Process | GO:0062237 | protein localization to postsynapse                                                    | 3/2279  | 48/18866  | 0.9403891 | 0.9630156 | 0.8713707 | 3  | PRKCZ/ZDHHC2/KIF5C                                                                                                                                 |
| Biological Process | GO:0005980 | glycogen catabolic process                                                             | 1/2279  | 22/18866  | 0.9412233 | 0.9630156 | 0.8713707 | 1  | PPP1CB                                                                                                                                             |
| Biological Process | GO:0021513 | spinal cord dorsal/ventral patterning                                                  | 1/2279  | 22/18866  | 0.9412233 | 0.9630156 | 0.8713707 | 1  | SUFU                                                                                                                                               |
| Biological Process | GO:0030859 | polarized epithelial cell differentiation                                              | 1/2279  | 22/18866  | 0.9412233 | 0.9630156 | 0.8713707 | 1  | ZDHHC7                                                                                                                                             |
| Biological Process | GO:0032700 | negative regulation of interleukin-17 production                                       | 1/2279  | 22/18866  | 0.9412233 | 0.9630156 | 0.8713707 | 1  | VSIR                                                                                                                                               |
| Biological Process | GO:0033617 | mitochondrial cytochrome c oxidase assembly                                            | 1/2279  | 22/18866  | 0.9412233 | 0.9630156 | 0.8713707 | 1  | COX19                                                                                                                                              |
| Biological Process | GO:0035809 | regulation of urine volume                                                             | 1/2279  | 22/18866  | 0.9412233 | 0.9630156 | 0.8713707 | 1  | GNAI2                                                                                                                                              |
| Biological Process | GO:0039531 | regulation of viral-induced cytoplasmic pattern recognition receptor signaling pathway | 1/2279  | 22/18866  | 0.9412233 | 0.9630156 | 0.8713707 | 1  | SEC14L1                                                                                                                                            |

|                    |            |                                                                                |         |           |           |           |           |    |                                                                                                                                                                                                              |                       |
|--------------------|------------|--------------------------------------------------------------------------------|---------|-----------|-----------|-----------|-----------|----|--------------------------------------------------------------------------------------------------------------------------------------------------------------------------------------------------------------|-----------------------|
| Biological Process | GO:0042749 | regulation of circadian sleep/wake cycle                                       | 1/2279  | 22/18866  | 0.9412233 | 0.9630156 | 0.8713707 | 1  |                                                                                                                                                                                                              | GHRL                  |
| Biological Process | GO:0044342 | type B pancreatic cell proliferation                                           | 1/2279  | 22/18866  | 0.9412233 | 0.9630156 | 0.8713707 | 1  |                                                                                                                                                                                                              | SGPP2                 |
| Biological Process | GO:0050802 | circadian sleep/wake cycle, sleep                                              | 1/2279  | 22/18866  | 0.9412233 | 0.9630156 | 0.8713707 | 1  |                                                                                                                                                                                                              | GHRL                  |
| Biological Process | GO:0051383 | kinetochore organization                                                       | 1/2279  | 22/18866  | 0.9412233 | 0.9630156 | 0.8713707 | 1  |                                                                                                                                                                                                              | MIS12                 |
| Biological Process | GO:0061339 | establishment or maintenance of monopolar cell polarity                        | 1/2279  | 22/18866  | 0.9412233 | 0.9630156 | 0.8713707 | 1  |                                                                                                                                                                                                              | PRKCI                 |
| Biological Process | GO:0099633 | protein localization to postsynaptic specialization membrane                   | 1/2279  | 22/18866  | 0.9412233 | 0.9630156 | 0.8713707 | 1  |                                                                                                                                                                                                              | PRKCZ                 |
| Biological Process | GO:0099645 | neurotransmitter receptor localization to postsynaptic specialization membrane | 1/2279  | 22/18866  | 0.9412233 | 0.9630156 | 0.8713707 | 1  |                                                                                                                                                                                                              | PRKCZ                 |
| Biological Process | GO:0035036 | sperm-egg recognition                                                          | 4/2279  | 60/18866  | 0.9422112 | 0.963837  | 0.8721139 | 4  |                                                                                                                                                                                                              | CD9/FOLR3/CLGN/UBAP2L |
| Biological Process | GO:0071103 | DNA conformation change                                                        | 34/2279 | 355/18866 | 0.942309  | 0.963837  | 0.8721139 | 34 | BLM/TTN/UBN1/TOP1MT/CABIN1/RTEL1/MCM5/WRNIP1/RECQL5/SMYD3/IGHMBP2/HDAC1/ATF7IP/MCM2/SMARCAL1/DFFB/RSF1/CHD9/DNMT1/CDC45/CHD8/HHEX/CENPM/ZNF X1/RUVBL1/CHAF1A/PARP10/BANF1/XPA/ERCC2/BRD2/MACROH2A2/H3C1/FBH1 |                       |



|                    |            |                                                                               |        |           |           |           |           |   |                                               |
|--------------------|------------|-------------------------------------------------------------------------------|--------|-----------|-----------|-----------|-----------|---|-----------------------------------------------|
| Biological Process | GO:0001580 | detection of chemical stimulus involved in sensory perception of bitter taste | 2/2279 | 36/18866  | 0.9424319 | 0.963837  | 0.8721139 | 2 | LPO/GNAT2                                     |
| Biological Process | GO:0045841 | negative regulation of mitotic metaphase/anaphase transition                  | 2/2279 | 36/18866  | 0.9424319 | 0.963837  | 0.8721139 | 2 | MAD1L1/PCID2                                  |
| Biological Process | GO:0001824 | blastocyst development                                                        | 8/2279 | 104/18866 | 0.9444596 | 0.9658068 | 0.8738963 | 8 | BRCA2/RTN4/CUL3/SP3/KDM4C/ST8SIA6/NDEL1/NODAL |
| Biological Process | GO:0031507 | heterochromatin assembly                                                      | 5/2279 | 72/18866  | 0.9456079 | 0.9666688 | 0.8746762 | 5 | HDAC1/ATF7IP/DNMT1/ZNF1/H3C1                  |
| Biological Process | GO:0051937 | catecholamine transport                                                       | 5/2279 | 72/18866  | 0.9456079 | 0.9666688 | 0.8746762 | 5 | NISCH/SYT17/DTNBP1/GRK2/PRKN                  |
| Biological Process | GO:0015872 | dopamine transport                                                            | 3/2279 | 49/18866  | 0.9457095 | 0.9666688 | 0.8746762 | 3 | SYT17/DTNBP1/PRKN                             |
| Biological Process | GO:0120178 | steroid hormone biosynthetic process                                          | 3/2279 | 49/18866  | 0.9457095 | 0.9666688 | 0.8746762 | 3 | HSD17B2/FDX1/DGKQ                             |
| Biological Process | GO:0030449 | regulation of complement activation                                           | 9/2279 | 115/18866 | 0.9465174 | 0.9669565 | 0.8749365 | 9 | C3AR1/CD55/C5AR2/CLU/PHB/CD59/C1S/CPB2/C1QB   |
| Biological Process | GO:0051084 | 'de novo' posttranslational protein folding                                   | 2/2279 | 37/18866  | 0.9482271 | 0.9669565 | 0.8749365 | 2 | DNAJB13/TOR1B                                 |

|                    |            |                                                                    |        |          |           |           |           |   |              |
|--------------------|------------|--------------------------------------------------------------------|--------|----------|-----------|-----------|-----------|---|--------------|
| Biological Process | GO:1902100 | negative regulation of metaphase/anaphase transition of cell cycle | 2/2279 | 37/18866 | 0.9482271 | 0.9669565 | 0.8749365 | 2 | MAD1L1/PCID2 |
| Biological Process | GO:2000273 | positive regulation of signaling receptor activity                 | 2/2279 | 37/18866 | 0.9482271 | 0.9669565 | 0.8749365 | 2 | TGFA/CCR2    |
| Biological Process | GO:0000966 | RNA 5'-end processing                                              | 1/2279 | 23/18866 | 0.9483318 | 0.9669565 | 0.8749365 | 1 | NOP14        |
| Biological Process | GO:0006063 | uronic acid metabolic process                                      | 1/2279 | 23/18866 | 0.9483318 | 0.9669565 | 0.8749365 | 1 | PRKCE        |
| Biological Process | GO:0006541 | glutamine metabolic process                                        | 1/2279 | 23/18866 | 0.9483318 | 0.9669565 | 0.8749365 | 1 | GFPT2        |
| Biological Process | GO:0007274 | neuromuscular synaptic transmission                                | 1/2279 | 23/18866 | 0.9483318 | 0.9669565 | 0.8749365 | 1 | KIF1B        |
| Biological Process | GO:0007289 | spermatid nucleus differentiation                                  | 1/2279 | 23/18866 | 0.9483318 | 0.9669565 | 0.8749365 | 1 | MFSD14A      |
| Biological Process | GO:0009147 | pyrimidine nucleoside triphosphate metabolic process               | 1/2279 | 23/18866 | 0.9483318 | 0.9669565 | 0.8749365 | 1 | UCK2         |
| Biological Process | GO:0016226 | iron-sulfur cluster assembly                                       | 1/2279 | 23/18866 | 0.9483318 | 0.9669565 | 0.8749365 | 1 | HSCB         |

|                    |            |                                                                   |        |          |           |           |           |   |          |
|--------------------|------------|-------------------------------------------------------------------|--------|----------|-----------|-----------|-----------|---|----------|
| Biological Process | GO:0019585 | glucuronate metabolic process                                     | 1/2279 | 23/18866 | 0.9483318 | 0.9669565 | 0.8749365 | 1 | PRKCE    |
| Biological Process | GO:0030539 | male genitalia development                                        | 1/2279 | 23/18866 | 0.9483318 | 0.9669565 | 0.8749365 | 1 | ASB1     |
| Biological Process | GO:0031163 | metallo-sulfur cluster assembly                                   | 1/2279 | 23/18866 | 0.9483318 | 0.9669565 | 0.8749365 | 1 | HSCB     |
| Biological Process | GO:0034643 | establishment of mitochondrion localization, microtubule-mediated | 1/2279 | 23/18866 | 0.9483318 | 0.9669565 | 0.8749365 | 1 | KIF1B    |
| Biological Process | GO:0042026 | protein refolding                                                 | 1/2279 | 23/18866 | 0.9483318 | 0.9669565 | 0.8749365 | 1 | BAG5     |
| Biological Process | GO:0044458 | motile cilium assembly                                            | 1/2279 | 23/18866 | 0.9483318 | 0.9669565 | 0.8749365 | 1 | CFAP221  |
| Biological Process | GO:0045723 | positive regulation of fatty acid biosynthetic process            | 1/2279 | 23/18866 | 0.9483318 | 0.9669565 | 0.8749365 | 1 | NR1H2    |
| Biological Process | GO:0046599 | regulation of centriole replication                               | 1/2279 | 23/18866 | 0.9483318 | 0.9669565 | 0.8749365 | 1 | CEP295NL |
| Biological Process | GO:0047497 | mitochondrion transport along microtubule                         | 1/2279 | 23/18866 | 0.9483318 | 0.9669565 | 0.8749365 | 1 | KIF1B    |

|                    |            |                                                       |         |           |           |           |           |    |                                                                |
|--------------------|------------|-------------------------------------------------------|---------|-----------|-----------|-----------|-----------|----|----------------------------------------------------------------|
| Biological Process | GO:0048026 | positive regulation of mRNA splicing, via spliceosome | 1/2279  | 23/18866  | 0.9483318 | 0.9669565 | 0.8749365 | 1  | DAZAP1                                                         |
| Biological Process | GO:0048791 | calcium ion-regulated exocytosis of neurotransmitter  | 1/2279  | 23/18866  | 0.9483318 | 0.9669565 | 0.8749365 | 1  | SYT17                                                          |
| Biological Process | GO:0071305 | cellular response to vitamin D                        | 1/2279  | 23/18866  | 0.9483318 | 0.9669565 | 0.8749365 | 1  | VDR                                                            |
| Biological Process | GO:0045814 | negative regulation of gene expression, epigenetic    | 10/2279 | 126/18866 | 0.9487467 | 0.9672757 | 0.8752254 | 10 | TRIM27/EPC1/KMT2D/CTBP1/PHF19/DNMT1/DYDC2/DYDC1/MACROH2A2/H3C1 |
| Biological Process | GO:0042795 | snRNA transcription by RNA polymerase II              | 5/2279  | 73/18866  | 0.9497725 | 0.9682177 | 0.8760777 | 5  | POLR2F/ELL2/ZC3H8/POU2F2/RPRD1B                                |
| Biological Process | GO:0099054 | presynapse assembly                                   | 3/2279  | 50/18866  | 0.9505855 | 0.9689425 | 0.8767336 | 3  | APP/NRXN1/EIF4G1                                               |
| Biological Process | GO:0042769 | DNA damage response, detection of DNA damage          | 2/2279  | 38/18866  | 0.9534631 | 0.9715404 | 0.8790842 | 2  | MRPS26/POLD3                                                   |
| Biological Process | GO:0045777 | positive regulation of blood pressure                 | 2/2279  | 38/18866  | 0.9534631 | 0.9715404 | 0.8790842 | 2  | PDE4D/HSD11B2                                                  |
| Biological Process | GO:0071392 | cellular response to estradiol stimulus               | 2/2279  | 38/18866  | 0.9534631 | 0.9715404 | 0.8790842 | 2  | IL10/CRHBP                                                     |

|                    |            |                                                                         |        |          |           |           |           |   |                                 |
|--------------------|------------|-------------------------------------------------------------------------|--------|----------|-----------|-----------|-----------|---|---------------------------------|
| Biological Process | GO:0009301 | snRNA transcription                                                     | 5/2279 | 74/18866 | 0.9536454 | 0.9715404 | 0.8790842 | 5 | POLR2F/ELL2/ZC3H8/POU2F2/RPRD1B |
| Biological Process | GO:0051881 | regulation of mitochondrial membrane potential                          | 5/2279 | 74/18866 | 0.9536454 | 0.9715404 | 0.8790842 | 5 | HSH2D/BCL2/BCL2L1/SPART/PRKN    |
| Biological Process | GO:0010640 | regulation of platelet-derived growth factor receptor signaling pathway | 1/2279 | 24/18866 | 0.9545809 | 0.9716598 | 0.8791923 | 1 | PTPRJ                           |
| Biological Process | GO:0014850 | response to muscle activity                                             | 1/2279 | 24/18866 | 0.9545809 | 0.9716598 | 0.8791923 | 1 | FIS1                            |
| Biological Process | GO:0021511 | spinal cord patterning                                                  | 1/2279 | 24/18866 | 0.9545809 | 0.9716598 | 0.8791923 | 1 | SUFU                            |
| Biological Process | GO:0021871 | forebrain regionalization                                               | 1/2279 | 24/18866 | 0.9545809 | 0.9716598 | 0.8791923 | 1 | TTC21B                          |
| Biological Process | GO:0042430 | indole-containing compound metabolic process                            | 1/2279 | 24/18866 | 0.9545809 | 0.9716598 | 0.8791923 | 1 | DDC                             |
| Biological Process | GO:0042738 | exogenous drug catabolic process                                        | 1/2279 | 24/18866 | 0.9545809 | 0.9716598 | 0.8791923 | 1 | NR1I2                           |
| Biological Process | GO:0042776 | mitochondrial ATP synthesis coupled proton transport                    | 1/2279 | 24/18866 | 0.9545809 | 0.9716598 | 0.8791923 | 1 | ATP5PD                          |

|                    |            |                                                     |         |           |           |           |           |    |                                                                                                                           |
|--------------------|------------|-----------------------------------------------------|---------|-----------|-----------|-----------|-----------|----|---------------------------------------------------------------------------------------------------------------------------|
| Biological Process | GO:0090103 | cochlea morphogenesis                               | 1/2279  | 24/18866  | 0.9545809 | 0.9716598 | 0.8791923 | 1  | PAX2                                                                                                                      |
| Biological Process | GO:0035272 | exocrine system development                         | 3/2279  | 51/18866  | 0.9550502 | 0.9720335 | 0.8795304 | 3  | TNF/FGFR1/TGFB1                                                                                                           |
| Biological Process | GO:0016072 | rRNA metabolic process                              | 21/2279 | 238/18866 | 0.9556374 | 0.9725268 | 0.8799768 | 21 | EXOSC2/WDR43/SLFN14/RCL1/DEDD2/USP36/DDX27/WDR46/NOB1/ERI3/WDR55/RMRP/PIH1D1/NOP14/NOL6/FBL/ERCC2/RIOK1/ISG20/GEMIN4/UTP4 |
| Biological Process | GO:0008543 | fibroblast growth factor receptor signaling pathway | 9/2279  | 118/18866 | 0.9560373 | 0.9728297 | 0.8802508 | 9  | SPRED2/POLR2F/FRS3/THBS1/NDST1/FGFR1/RUNX2/FAM20C/OTX2                                                                    |
| Biological Process | GO:0098659 | inorganic cation import across plasma membrane      | 7/2279  | 97/18866  | 0.9569235 | 0.9735229 | 0.880878  | 7  | TRPM2/KCNJ15/FXYD2/SLC8A1/TRPV2/SLC12A1/SLC12A7                                                                           |
| Biological Process | GO:0099587 | inorganic ion import across plasma membrane         | 7/2279  | 97/18866  | 0.9569235 | 0.9735229 | 0.880878  | 7  | TRPM2/KCNJ15/FXYD2/SLC8A1/TRPV2/SLC12A1/SLC12A7                                                                           |
| Biological Process | GO:0000578 | embryonic axis specification                        | 2/2279  | 39/18866  | 0.9581902 | 0.9743942 | 0.8816665 | 2  | PCSK6/TMED2                                                                                                               |
| Biological Process | GO:0010837 | regulation of keratinocyte proliferation            | 2/2279  | 39/18866  | 0.9581902 | 0.9743942 | 0.8816665 | 2  | VDR/CDH3                                                                                                                  |
| Biological Process | GO:0032506 | cytokinetic process                                 | 2/2279  | 39/18866  | 0.9581902 | 0.9743942 | 0.8816665 | 2  | MYH9/SNX18                                                                                                                |

|                    |            |                                                            |         |           |           |           |           |    |                                                                                                                           |
|--------------------|------------|------------------------------------------------------------|---------|-----------|-----------|-----------|-----------|----|---------------------------------------------------------------------------------------------------------------------------|
| Biological Process | GO:2000816 | negative regulation of mitotic sister chromatid separation | 2/2279  | 39/18866  | 0.9581902 | 0.9743942 | 0.8816665 | 2  | MAD1L1/PCID2                                                                                                              |
| Biological Process | GO:0006612 | protein targeting to membrane                              | 18/2279 | 210/18866 | 0.9584311 | 0.9745349 | 0.8817937 | 18 | KCNE1/ZDHHC18/ITGB1BP1/ZDHHC14/RABGEF1/ZDHHC2/ZDHHC7/ZDHHC1/PRKCI/PEX26/ITGB2/MICALL1/FIS1/NACAD/MYO1C/MIEF1/RPL23A/PDZK1 |
| Biological Process | GO:0007007 | inner mitochondrial membrane organization                  | 3/2279  | 52/18866  | 0.9591351 | 0.9751463 | 0.882347  | 3  | SPG7/IMMT/ATP5PD                                                                                                          |
| Biological Process | GO:0015874 | norepinephrine transport                                   | 1/2279  | 25/18866  | 0.9600745 | 0.9754751 | 0.8826445 | 1  | NISCH                                                                                                                     |
| Biological Process | GO:0021895 | cerebral cortex neuron differentiation                     | 1/2279  | 25/18866  | 0.9600745 | 0.9754751 | 0.8826445 | 1  | ZNF335                                                                                                                    |
| Biological Process | GO:0022410 | circadian sleep/wake cycle process                         | 1/2279  | 25/18866  | 0.9600745 | 0.9754751 | 0.8826445 | 1  | GHRL                                                                                                                      |
| Biological Process | GO:0042537 | benzene-containing compound metabolic process              | 1/2279  | 25/18866  | 0.9600745 | 0.9754751 | 0.8826445 | 1  | FAH                                                                                                                       |
| Biological Process | GO:0060575 | intestinal epithelial cell differentiation                 | 1/2279  | 25/18866  | 0.9600745 | 0.9754751 | 0.8826445 | 1  | NPY                                                                                                                       |
| Biological Process | GO:0061436 | establishment of skin barrier                              | 1/2279  | 25/18866  | 0.9600745 | 0.9754751 | 0.8826445 | 1  | FA2H                                                                                                                      |

|                    |            |                                              |         |           |           |           |           |    |                                                                                                                                                                                                                                                                       |
|--------------------|------------|----------------------------------------------|---------|-----------|-----------|-----------|-----------|----|-----------------------------------------------------------------------------------------------------------------------------------------------------------------------------------------------------------------------------------------------------------------------|
| Biological Process | GO:0008544 | epidermis development                        | 46/2279 | 477/18866 | 0.9610549 | 0.9763668 | 0.8834514 | 46 | CSTA/COL17A1/TFDP1/RUNX1/VDR/TNF/TGM5/KRT17/JUP/PKP1/SLC44A4/DLL1/RBPJ/PCSK6/HDAC1/CDH3/FGFR1/OVOL1/PRKCH/PERP/MYO5A/NF1/GRHL2/NUMA1/BCR/CNFN/KL<br>F7/SGPP1/KRTAP5-9/BCL2/NOTCH1/AQP3/FA2H/TMC1/TGM3/KRT23/KAZN/ZBED2/LAMB3/RELA/KRT7/INHBA/ERCC2/NTF4/PPL/MACROH2A2 |
| Biological Process | GO:1905819 | negative regulation of chromosome separation | 2/2279  | 40/18866  | 0.962455  | 0.9775356 | 0.884509  | 2  | MAD1L1/PCID2                                                                                                                                                                                                                                                          |
| Biological Process | GO:0007588 | excretion                                    | 4/2279  | 65/18866  | 0.962514  | 0.9775356 | 0.884509  | 4  | COMT/GNAI2/AGTR1/AQP9                                                                                                                                                                                                                                                 |
| Biological Process | GO:0048278 | vesicle docking                              | 4/2279  | 65/18866  | 0.962514  | 0.9775356 | 0.884509  | 4  | STX5/VPS18/CTBP2/TSNARE1                                                                                                                                                                                                                                              |
| Biological Process | GO:0070125 | mitochondrial translational elongation       | 6/2279  | 88/18866  | 0.9628381 | 0.9776875 | 0.8846464 | 6  | MRPL3/MRPL38/MRPS21/MRPS26/MRPL28/AURKAIP1                                                                                                                                                                                                                            |
| Biological Process | GO:0099172 | presynapse organization                      | 3/2279  | 53/18866  | 0.9628694 | 0.9776875 | 0.8846464 | 3  | APP/NRXN1/EIF4G1                                                                                                                                                                                                                                                      |
| Biological Process | GO:0006342 | chromatin silencing                          | 5/2279  | 77/18866  | 0.963686  | 0.9784121 | 0.885302  | 5  | KMT2D/CTBP1/DYDC2/DYDC1/MACROH2A2                                                                                                                                                                                                                                     |
| Biological Process | GO:0034728 | nucleosome organization                      | 15/2279 | 183/18866 | 0.9643489 | 0.9784984 | 0.8853801 | 15 | SRCAP/UBN1/SETD2/CABIN1/SMYD3/MCM2/RSF1/SMARCD1/SMARCD2/CENPM/RUVBL1/CHAF1A/BRD2/MACROH2A2/H3C1                                                                                                                                                                       |
| Biological Process | GO:0001945 | lymph vessel development                     | 1/2279  | 26/18866  | 0.9649039 | 0.9784984 | 0.8853801 | 1  | VASH1                                                                                                                                                                                                                                                                 |



|                    |            |                                                                            |        |          |           |           |           |   |        |
|--------------------|------------|----------------------------------------------------------------------------|--------|----------|-----------|-----------|-----------|---|--------|
| Biological Process | GO:0008535 | respiratory chain complex IV assembly                                      | 1/2279 | 26/18866 | 0.9649039 | 0.9784984 | 0.8853801 | 1 | COX19  |
| Biological Process | GO:0035640 | exploration behavior                                                       | 1/2279 | 26/18866 | 0.9649039 | 0.9784984 | 0.8853801 | 1 | PRKCE  |
| Biological Process | GO:0040037 | negative regulation of fibroblast growth factor receptor signaling pathway | 1/2279 | 26/18866 | 0.9649039 | 0.9784984 | 0.8853801 | 1 | THBS1  |
| Biological Process | GO:0042104 | positive regulation of activated T cell proliferation                      | 1/2279 | 26/18866 | 0.9649039 | 0.9784984 | 0.8853801 | 1 | FADD   |
| Biological Process | GO:0042737 | drug catabolic process                                                     | 1/2279 | 26/18866 | 0.9649039 | 0.9784984 | 0.8853801 | 1 | NR1I2  |
| Biological Process | GO:0051654 | establishment of mitochondrion localization                                | 1/2279 | 26/18866 | 0.9649039 | 0.9784984 | 0.8853801 | 1 | KIF1B  |
| Biological Process | GO:0060343 | trabecula formation                                                        | 1/2279 | 26/18866 | 0.9649039 | 0.9784984 | 0.8853801 | 1 | FHL2   |
| Biological Process | GO:0070129 | regulation of mitochondrial translation                                    | 1/2279 | 26/18866 | 0.9649039 | 0.9784984 | 0.8853801 | 1 | MTG2   |
| Biological Process | GO:0140058 | neuron projection arborization                                             | 1/2279 | 26/18866 | 0.9649039 | 0.9784984 | 0.8853801 | 1 | MFSD2A |

|                    |            |                                                      |         |           |           |           |           |    |                                                                                                    |
|--------------------|------------|------------------------------------------------------|---------|-----------|-----------|-----------|-----------|----|----------------------------------------------------------------------------------------------------|
| Biological Process | GO:0006400 | tRNA modification                                    | 6/2279  | 89/18866  | 0.9656107 | 0.9790062 | 0.8858396 | 6  | THADA/METTL6/CDKAL1/PUS7/DUS2/METTL8                                                               |
| Biological Process | GO:0070126 | mitochondrial translational termination              | 6/2279  | 89/18866  | 0.9656107 | 0.9790062 | 0.8858396 | 6  | MRPL3/MRPL38/MRPS21/MRPS26/MRPL28/AURKAIP1                                                         |
| Biological Process | GO:0022900 | electron transport chain                             | 15/2279 | 184/18866 | 0.9662992 | 0.9793916 | 0.8861883 | 15 | ALDH2/NDUFS2/ALDH4A1/NCF2/FDX1/NDUFS8/POR/AIFM2/NDUFB6/GLRX2/NDUFA4L2/P4HA2/ASPH/SDHD/AOX1         |
| Biological Process | GO:0006458 | 'de novo' protein folding                            | 2/2279  | 41/18866  | 0.9663001 | 0.9793916 | 0.8861883 | 2  | DNAJB13/TOR1B                                                                                      |
| Biological Process | GO:0050913 | sensory perception of bitter taste                   | 2/2279  | 41/18866  | 0.9663001 | 0.9793916 | 0.8861883 | 2  | LPO/GNAT2                                                                                          |
| Biological Process | GO:0031497 | chromatin assembly                                   | 16/2279 | 195/18866 | 0.9679927 | 0.9810026 | 0.8876459 | 16 | UBN1/CABIN1/SMYD3/HDAC1/ATF7IP/MCM2/RSF1/DNMT1/CENPM/ZNF1/RUVBL1/CHAF1A/PARP10/BRD2/MACROH2A2/H3C1 |
| Biological Process | GO:0042481 | regulation of odontogenesis                          | 1/2279  | 27/18866  | 0.9691493 | 0.9820699 | 0.8886117 | 1  | RUNX2                                                                                              |
| Biological Process | GO:0006120 | mitochondrial electron transport, NADH to ubiquinone | 3/2279  | 55/18866  | 0.9693945 | 0.9822137 | 0.8887418 | 3  | NDUFS2/NDUFS8/NDUFB6                                                                               |
| Biological Process | GO:0046006 | regulation of activated T cell proliferation         | 2/2279  | 42/18866  | 0.9697645 | 0.982379  | 0.8888914 | 2  | RIPK3/FADD                                                                                         |

|                    |            |                                                                        |         |           |           |           |           |    |                                                                                                                                                        |
|--------------------|------------|------------------------------------------------------------------------|---------|-----------|-----------|-----------|-----------|----|--------------------------------------------------------------------------------------------------------------------------------------------------------|
| Biological Process | GO:0050912 | detection of chemical stimulus involved in sensory perception of taste | 2/2279  | 42/18866  | 0.9697645 | 0.982379  | 0.8888914 | 2  | LPO/GNAT2                                                                                                                                              |
| Biological Process | GO:0006399 | tRNA metabolic process                                                 | 15/2279 | 186/18866 | 0.969918  | 0.9824297 | 0.8889373 | 15 | THADA/EXOSC2/CARS2/METTL6/CDKAL1/PUS7/DUS2/EARS2/CPSF4/PTCD1/METTL8/GRSF1/MARS1/GATB/YARS1                                                             |
| Biological Process | GO:0001676 | long-chain fatty acid metabolic process                                | 8/2279  | 113/18866 | 0.9702575 | 0.9825898 | 0.8890821 | 8  | MGLL/ACSL1/ACOT7/CYP4F3/MYO5A/EPHX1/ADTRP/CPT1A                                                                                                        |
| Biological Process | GO:0006334 | nucleosome assembly                                                    | 11/2279 | 145/18866 | 0.9702829 | 0.9825898 | 0.8890821 | 11 | UBN1/CABIN1/SMYD3/MCM2/RSF1/CENPM/RUVBL1/CHAF1A/BRD2/MACROH2A2/H3C1                                                                                    |
| Biological Process | GO:0006364 | rRNA processing                                                        | 19/2279 | 227/18866 | 0.9712607 | 0.9834752 | 0.8898833 | 19 | EXOSC2/WDR43/RCL1/USP36/DDX27/WDR46/NOB1/ERI3/WDR55/RMRP/PIH1D1/NOP14/NOL6/FBL/ERCC2/RIOK1/ISG20/GEMIN4/UTP4                                           |
| Biological Process | GO:0030216 | keratinocyte differentiation                                           | 27/2279 | 306/18866 | 0.9720907 | 0.9839656 | 0.890327  | 27 | CSTA/RUNX1/VDR/TGM5/KRT17/JUP/PKP1/RBPJ/PCSK6/CDH3/PRKCH/PERP/GRHL2/NUMA1/BCR/CNFN/SGPP1/KRTAP5-9/NOTCH1/AQP3/TGM3/KRT23/KAZN/ZBED2/KRT7/PPL/MACROH2A2 |
| Biological Process | GO:0044344 | cellular response to fibroblast growth factor stimulus                 | 11/2279 | 146/18866 | 0.9721322 | 0.9839656 | 0.890327  | 11 | SPRED2/ITGB1BP1/POLR2F/CCL5/FRS3/THBS1/NDST1/FGFR1/RUNX2/FAM20C/OTX2                                                                                   |
| Biological Process | GO:0022037 | metencephalon development                                              | 8/2279  | 114/18866 | 0.9723176 | 0.9839656 | 0.890327  | 8  | PHOX2A/DLL1/NCOA1/BCL2/TTC21B/TLL1/CPLANE1/COQ8B                                                                                                       |
| Biological Process | GO:0042472 | inner ear morphogenesis                                                | 7/2279  | 103/18866 | 0.9723414 | 0.9839656 | 0.890327  | 7  | ABR/SLC44A4/LRIG1/PAX2/FGFR1/TTC39C/BCR                                                                                                                |

|                    |            |                                                     |         |           |           |           |           |    |                                                                           |
|--------------------|------------|-----------------------------------------------------|---------|-----------|-----------|-----------|-----------|----|---------------------------------------------------------------------------|
| Biological Process | GO:0034605 | cellular response to heat                           | 9/2279  | 125/18866 | 0.9726256 | 0.9839656 | 0.890327  | 9  | RPTOR/RAE1/THBS1/NF1/NUP93/DNAJB6/SEC13/CREBBP/BAG5                       |
| Biological Process | GO:0000395 | mRNA 5'-splice site recognition                     | 1/2279  | 28/18866  | 0.9728814 | 0.9839656 | 0.890327  | 1  | SFSWAP                                                                    |
| Biological Process | GO:0010894 | negative regulation of steroid biosynthetic process | 1/2279  | 28/18866  | 0.9728814 | 0.9839656 | 0.890327  | 1  | GFI1                                                                      |
| Biological Process | GO:0031167 | rRNA methylation                                    | 1/2279  | 28/18866  | 0.9728814 | 0.9839656 | 0.890327  | 1  | FBL                                                                       |
| Biological Process | GO:0033561 | regulation of water loss via skin                   | 1/2279  | 28/18866  | 0.9728814 | 0.9839656 | 0.890327  | 1  | FA2H                                                                      |
| Biological Process | GO:0042745 | circadian sleep/wake cycle                          | 1/2279  | 28/18866  | 0.9728814 | 0.9839656 | 0.890327  | 1  | GHRL                                                                      |
| Biological Process | GO:0007339 | binding of sperm to zona pellucida                  | 2/2279  | 43/18866  | 0.9728842 | 0.9839656 | 0.890327  | 2  | CLGN/UBAP2L                                                               |
| Biological Process | GO:0006956 | complement activation                               | 14/2279 | 178/18866 | 0.9735508 | 0.9845349 | 0.8908422 | 14 | MFAP4/C3AR1/CD55/IGHV6-1/C5AR2/MASP1/CLU/PHB/FCN1/CD59/C1S/CPB2/C1QB/C1RL |
| Biological Process | GO:0007004 | telomere maintenance via telomerase                 | 4/2279  | 69/18866  | 0.9737503 | 0.9846319 | 0.8909299 | 4  | TNKS/HMBOX1/SMG6/CCT6A                                                    |

|                    |            |                                               |         |           |           |           |           |    |                                                                                                                         |
|--------------------|------------|-----------------------------------------------|---------|-----------|-----------|-----------|-----------|----|-------------------------------------------------------------------------------------------------------------------------|
| Biological Process | GO:0045292 | mRNA cis splicing, via spliceosome            | 3/2279  | 57/18866  | 0.9748241 | 0.985508  | 0.8917226 | 3  | RBM19/SFSWAP/PRPF40B                                                                                                    |
| Biological Process | GO:0097120 | receptor localization to synapse              | 3/2279  | 57/18866  | 0.9748241 | 0.985508  | 0.8917226 | 3  | PRKCZ/CNIH2/KIF5C                                                                                                       |
| Biological Process | GO:0006323 | DNA packaging                                 | 20/2279 | 240/18866 | 0.9755086 | 0.9857757 | 0.8919648 | 20 | TTN/UBN1/CABIN1/SMYD3/HDAC1/ATF7IP/MCM2/DFFB/RSF1/DNMT1/CDCAS/CENPM/ZNF1/RUVBL1/CHAF1A/PARP10/BANF1/BRD2/MACROH2A2/H3C1 |
| Biological Process | GO:0006904 | vesicle docking involved in exocytosis        | 2/2279  | 44/18866  | 0.9756918 | 0.9857757 | 0.8919648 | 2  | VPS18/CTBP2                                                                                                             |
| Biological Process | GO:0010824 | regulation of centrosome duplication          | 2/2279  | 44/18866  | 0.9756918 | 0.9857757 | 0.8919648 | 2  | POC1A/CEP295NL                                                                                                          |
| Biological Process | GO:1903539 | protein localization to postsynaptic membrane | 2/2279  | 44/18866  | 0.9756918 | 0.9857757 | 0.8919648 | 2  | PRKCZ/ZDHHC2                                                                                                            |
| Biological Process | GO:0001835 | blastocyst hatching                           | 1/2279  | 29/18866  | 0.9761622 | 0.9857757 | 0.8919648 | 1  | ST8SIA6                                                                                                                 |
| Biological Process | GO:0019835 | cytolysis                                     | 1/2279  | 29/18866  | 0.9761622 | 0.9857757 | 0.8919648 | 1  | TGFB1                                                                                                                   |
| Biological Process | GO:0035188 | hatching                                      | 1/2279  | 29/18866  | 0.9761622 | 0.9857757 | 0.8919648 | 1  | ST8SIA6                                                                                                                 |

|                    |            |                                              |         |           |           |           |           |    |                                                                                                                                                                                                                                                                                    |
|--------------------|------------|----------------------------------------------|---------|-----------|-----------|-----------|-----------|----|------------------------------------------------------------------------------------------------------------------------------------------------------------------------------------------------------------------------------------------------------------------------------------|
| Biological Process | GO:0048240 | sperm capacitation                           | 1/2279  | 29/18866  | 0.9761622 | 0.9857757 | 0.8919648 | 1  | DEFB1                                                                                                                                                                                                                                                                              |
| Biological Process | GO:0071684 | organism emergence from protective structure | 1/2279  | 29/18866  | 0.9761622 | 0.9857757 | 0.8919648 | 1  | ST8SIA6                                                                                                                                                                                                                                                                            |
| Biological Process | GO:0006415 | translational termination                    | 7/2279  | 105/18866 | 0.9762302 | 0.9857757 | 0.8919648 | 7  | MRPL3/MRPL38/MRPS21/MRPS26/MRPL28/AURKAIP1/SHFL                                                                                                                                                                                                                                    |
| Biological Process | GO:0007631 | feeding behavior                             | 7/2279  | 105/18866 | 0.9762302 | 0.9857757 | 0.8919648 | 7  | APP/DERL2/GHRL/TTC21B/CPT1A/NPY/PRLHR                                                                                                                                                                                                                                              |
| Biological Process | GO:0019369 | arachidonic acid metabolic process           | 3/2279  | 58/18866  | 0.9771828 | 0.9865278 | 0.8926454 | 3  | MGLL/CYP4F3/EPHX1                                                                                                                                                                                                                                                                  |
| Biological Process | GO:1903793 | positive regulation of anion transport       | 3/2279  | 58/18866  | 0.9771828 | 0.9865278 | 0.8926454 | 3  | MAP2K6/ATP8A1/CEBPB                                                                                                                                                                                                                                                                |
| Biological Process | GO:0007286 | spermatid development                        | 12/2279 | 160/18866 | 0.9777135 | 0.9869588 | 0.8930354 | 12 | ACRBP/SPAG6/CDYL/SMARCA2/DEFB1/JAM3/IQCG/DMC1/ARMC2/FSCN3/TTL1/MFSD14A                                                                                                                                                                                                             |
| Biological Process | GO:0034660 | ncRNA metabolic process                      | 46/2279 | 493/18866 | 0.9784669 | 0.9872551 | 0.8933035 | 46 | PIWIL4/THADA/MOV10L1/EXOSC2/WDR43/SMAD3/SLFN14/RCL1/AGO1/DEDD2/USP36/CARS2/DDX27/AGO2/WDR46/METTL6/NOB1/ERI3/WDR55/CDKAL1/RMRP/PUS7/PIH1D1/NO<br>P14/DIS3L2/DUS2/SND1/EARS2/RELA/TOE1/NOL6/CPSF4/PTCD1/ZCCHC8/FBL/TUT1/ERCC2/RIOK1/ISG20/METTL8/GEMIN4/GRSF1/MARS1/GATB/UTP4/YARS1 |
| Biological Process | GO:0000027 | ribosomal large subunit assembly             | 1/2279  | 30/18866  | 0.9790462 | 0.9872551 | 0.8933035 | 1  | RPL23A                                                                                                                                                                                                                                                                             |

|                    |            |                                                   |        |          |           |           |           |   |                   |
|--------------------|------------|---------------------------------------------------|--------|----------|-----------|-----------|-----------|---|-------------------|
| Biological Process | GO:0001516 | prostaglandin biosynthetic process                | 1/2279 | 30/18866 | 0.9790462 | 0.9872551 | 0.8933035 | 1 | PRXL2B            |
| Biological Process | GO:0007271 | synaptic transmission, cholinergic                | 1/2279 | 30/18866 | 0.9790462 | 0.9872551 | 0.8933035 | 1 | COLQ              |
| Biological Process | GO:0032372 | negative regulation of sterol transport           | 1/2279 | 30/18866 | 0.9790462 | 0.9872551 | 0.8933035 | 1 | MIR27A            |
| Biological Process | GO:0032375 | negative regulation of cholesterol transport      | 1/2279 | 30/18866 | 0.9790462 | 0.9872551 | 0.8933035 | 1 | MIR27A            |
| Biological Process | GO:0036258 | multivesicular body assembly                      | 1/2279 | 30/18866 | 0.9790462 | 0.9872551 | 0.8933035 | 1 | MVB12A            |
| Biological Process | GO:0045939 | negative regulation of steroid metabolic process  | 1/2279 | 30/18866 | 0.9790462 | 0.9872551 | 0.8933035 | 1 | GFI1              |
| Biological Process | GO:0046457 | prostanoid biosynthetic process                   | 1/2279 | 30/18866 | 0.9790462 | 0.9872551 | 0.8933035 | 1 | PRXL2B            |
| Biological Process | GO:0060122 | inner ear receptor cell stereocilium organization | 1/2279 | 30/18866 | 0.9790462 | 0.9872551 | 0.8933035 | 1 | CDH23             |
| Biological Process | GO:0046456 | icosanoid biosynthetic process                    | 3/2279 | 59/18866 | 0.97933   | 0.9874366 | 0.8934677 | 3 | GGT1/MGST2/PRXL2B |

|                    |            |                                                                               |         |           |           |           |           |    |                                                                      |
|--------------------|------------|-------------------------------------------------------------------------------|---------|-----------|-----------|-----------|-----------|----|----------------------------------------------------------------------|
| Biological Process | GO:0001510 | RNA methylation                                                               | 5/2279  | 84/18866  | 0.9798278 | 0.9878336 | 0.8938269 | 5  | THADA/METTL6/RBM15B/FBL/METTL8                                       |
| Biological Process | GO:0050798 | activated T cell proliferation                                                | 2/2279  | 46/18866  | 0.9804874 | 0.9883938 | 0.8943338 | 2  | RIPK3/FADD                                                           |
| Biological Process | GO:0008033 | tRNA processing                                                               | 9/2279  | 130/18866 | 0.9807389 | 0.9885424 | 0.8944682 | 9  | THADA/METTL6/CDKAL1/PUS7/DUS2/CPSF4/PTCD1/METTL8/GRSF1               |
| Biological Process | GO:0031338 | regulation of vesicle fusion                                                  | 1/2279  | 31/18866  | 0.9815814 | 0.9892866 | 0.8951417 | 1  | VPS18                                                                |
| Biological Process | GO:0000184 | nuclear-transcribed mRNA<br>catabolic process, nonsense-<br>mediated decay    | 8/2279  | 120/18866 | 0.9821704 | 0.9897752 | 0.8955838 | 8  | SMG7/CTIF/SMG6/PPP2R1A/NBAS/SECISBP2/RPL23A/EIF4G1                   |
| Biological Process | GO:0071774 | response to fibroblast<br>growth factor                                       | 11/2279 | 153/18866 | 0.9824219 | 0.98982   | 0.8956243 | 11 | SPRED2/ITGB1BP1/POLR2F/CCL5/FRS3/THBS1/NDST1/FGFR1/RUNX2/FAM20C/OTX2 |
| Biological Process | GO:0045776 | negative regulation of blood<br>pressure                                      | 2/2279  | 47/18866  | 0.9825274 | 0.98982   | 0.8956243 | 2  | GJA5/KCNK6                                                           |
| Biological Process | GO:0048806 | genitalia development                                                         | 2/2279  | 47/18866  | 0.9825274 | 0.98982   | 0.8956243 | 2  | ASB1/TYRO3                                                           |
| Biological Process | GO:0097549 | chromatin organization<br>involved in negative<br>regulation of transcription | 10/2279 | 143/18866 | 0.9833664 | 0.9905451 | 0.8962803 | 10 | HDAC1/KMT2D/CTBP1/ATF7IP/DNMT1/ZNF1/DYDC2/DYDC1/MACROH2A2/H3C1       |



|                    |            |                                                |         |           |           |           |           |    |                                                                                                                   |
|--------------------|------------|------------------------------------------------|---------|-----------|-----------|-----------|-----------|----|-------------------------------------------------------------------------------------------------------------------|
| Biological Process | GO:0120254 | olefinic compound metabolic process            | 8/2279  | 121/18866 | 0.9834556 | 0.9905451 | 0.8962803 | 8  | MGLL/ACSL1/DHRS9/CYP4F3/RDH10/DGKQ/EPHX1/ALDH1A2                                                                  |
| Biological Process | GO:1990928 | response to amino acid starvation              | 2/2279  | 48/18866  | 0.9843595 | 0.9913504 | 0.897009  | 2  | LARP1/NPRL2                                                                                                       |
| Biological Process | GO:0048515 | spermatid differentiation                      | 12/2279 | 166/18866 | 0.9849056 | 0.9917953 | 0.8974116 | 12 | ACRBP/SPAG6/CDYL/SMARCA2/DEFB1/JAM3/IQCG/DMC1/ARMC2/FSCN3/TTLL1/MFSD14A                                           |
| Biological Process | GO:0034754 | cellular hormone metabolic process             | 9/2279  | 134/18866 | 0.9855671 | 0.9923331 | 0.8978982 | 9  | PNPLA2/DHRS9/AKR1D1/HSD17B2/COMT/FDX1/RDH10/DGKQ/ALDH1A2                                                          |
| Biological Process | GO:0070286 | axonemal dynein complex assembly               | 1/2279  | 33/18866  | 0.9857691 | 0.9923331 | 0.8978982 | 1  | DNAI2                                                                                                             |
| Biological Process | GO:0120255 | olefinic compound biosynthetic process         | 1/2279  | 33/18866  | 0.9857691 | 0.9923331 | 0.8978982 | 1  | DGKQ                                                                                                              |
| Biological Process | GO:0071826 | ribonucleoprotein complex subunit organization | 19/2279 | 240/18866 | 0.9858575 | 0.9923331 | 0.8978982 | 19 | SNRPD3/SRPK2/AGO1/AGO2/SF1/EIF3M/PRPF8/SFSWAP/CEL2/NOL3/CEL2/SNUPN/PIH1D1/PRPF6/EIF3H/RUVBL1/RPL23A/GEMIN4/TFIP11 |
| Biological Process | GO:0006278 | RNA-dependent DNA biosynthetic process         | 4/2279  | 76/18866  | 0.9861919 | 0.9925645 | 0.8981076 | 4  | TNKS/HMBOX1/SMG6/CCT6A                                                                                            |
| Biological Process | GO:0032543 | mitochondrial translation                      | 9/2279  | 135/18866 | 0.9865848 | 0.9928548 | 0.8983703 | 9  | MRPL3/MRPL38/MTG2/MRPS21/MRPS26/MRPL28/EARS2/AURKAIP1/GATB                                                        |

|                    |            |                                    |         |           |           |           |           |    |                                                                                                              |
|--------------------|------------|------------------------------------|---------|-----------|-----------|-----------|-----------|----|--------------------------------------------------------------------------------------------------------------|
| Biological Process | GO:0043616 | keratinocyte proliferation         | 2/2279  | 50/18866  | 0.9874799 | 0.9936504 | 0.8990901 | 2  | VDR/CDH3                                                                                                     |
| Biological Process | GO:0022618 | ribonucleoprotein complex assembly | 18/2279 | 233/18866 | 0.9882743 | 0.9943444 | 0.8997181 | 18 | SNRPD3/SRPK2/AGO1/AGO2/SF1/EIF3M/PRPF8/SFSWAP/CELF2/NOL3/CELF1/SNUPN/PIH1D1/PRPF6/EIF3H/RUVBL1/RPL23A/GEMIN4 |
| Biological Process | GO:0098586 | cellular response to virus         | 3/2279  | 65/18866  | 0.9886793 | 0.9946465 | 0.8999915 | 3  | PHB/SEC14L1/POU2F2                                                                                           |
| Biological Process | GO:0090102 | cochlea development                | 2/2279  | 51/18866  | 0.9888036 | 0.9946663 | 0.9000094 | 2  | PAX2/MCM2                                                                                                    |
| Biological Process | GO:0002181 | cytoplasmic translation            | 6/2279  | 103/18866 | 0.9889507 | 0.9947089 | 0.9000479 | 6  | ZNF385A/EIF3M/CPEB3/PKM/EIF3H/EIF4G1                                                                         |
| Biological Process | GO:0009953 | dorsal/ventral pattern formation   | 5/2279  | 92/18866  | 0.9899793 | 0.9956381 | 0.9008887 | 5  | SUFU/PAX7/DSCAML1/BMPR1B/TTC21B                                                                              |
| Biological Process | GO:0021549 | cerebellum development             | 6/2279  | 105/18866 | 0.9906695 | 0.9962268 | 0.9014214 | 6  | DLL1/NCOA1/TTC21B/TLL1/CPLANE1/COQ8B                                                                         |
| Biological Process | GO:0019080 | viral gene expression              | 14/2279 | 195/18866 | 0.9908329 | 0.9962857 | 0.9014747 | 14 | TRIM27/CTDP1/TRIM8/RAE1/POLR2F/CCL5/HDAC1/NUP93/SEC13/RSF1/USF2/RPL23A/SPCS1/SHFL                            |
| Biological Process | GO:0017004 | cytochrome complex assembly        | 1/2279  | 37/18866  | 0.9915053 | 0.9968563 | 0.901991  | 1  | COX19                                                                                                        |

|                    |            |                                                                |         |           |           |           |           |    |                                                                                                                                                                                                          |
|--------------------|------------|----------------------------------------------------------------|---------|-----------|-----------|-----------|-----------|----|----------------------------------------------------------------------------------------------------------------------------------------------------------------------------------------------------------|
| Biological Process | GO:0034470 | ncRNA processing                                               | 34/2279 | 400/18866 | 0.9916491 | 0.9968953 | 0.9020263 | 34 | THADA/EXOSC2/WDR43/SMAD3/RCL1/AGO1/USP36/DDX27/AGO2/WDR46/METTL6/NOB1/ERI3/WDR55/CDKAL1/RMRP/PUS7/PIH1D1/NOP14/DUS2/TOE1/NOL6/CPSF4/PTCD1/ZCC<br>HC8/FBL/TUT1/ERCC2/RIOK1/ISG20/METTL8/GEMIN4/GRSF1/UTP4 |
| Biological Process | GO:0140053 | mitochondrial gene expression                                  | 11/2279 | 165/18866 | 0.9923496 | 0.9973493 | 0.9024371 | 11 | MRPL3/MRPL38/MTG2/MRPS21/MRPS26/MRPL28/EARS2/AURKAIP1/TBRG4/PRKAA1/GATB                                                                                                                                  |
| Biological Process | GO:0051954 | positive regulation of amine transport                         | 1/2279  | 38/18866  | 0.9925335 | 0.9973493 | 0.9024371 | 1  | GRK2                                                                                                                                                                                                     |
| Biological Process | GO:0071276 | cellular response to cadmium ion                               | 1/2279  | 38/18866  | 0.9925335 | 0.9973493 | 0.9024371 | 1  | GSN                                                                                                                                                                                                      |
| Biological Process | GO:0035296 | regulation of tube diameter                                    | 9/2279  | 143/18866 | 0.9926255 | 0.9973493 | 0.9024371 | 9  | ITGB1BP1/SLC8A1/GJA5/HRH1/PER2/P2RX1/F2R/NPPC/AGTR1                                                                                                                                                      |
| Biological Process | GO:0097746 | regulation of blood vessel diameter                            | 9/2279  | 143/18866 | 0.9926255 | 0.9973493 | 0.9024371 | 9  | ITGB1BP1/SLC8A1/GJA5/HRH1/PER2/P2RX1/F2R/NPPC/AGTR1                                                                                                                                                      |
| Biological Process | GO:0002455 | humoral immune response mediated by circulating immunoglobulin | 10/2279 | 155/18866 | 0.9929795 | 0.9975995 | 0.9026634 | 10 | CD55/TNF/IGHV6-1/PTPN6/CLU/C1S/PTPRC/C1QB/BCL3/C1RL                                                                                                                                                      |
| Biological Process | GO:0035150 | regulation of tube size                                        | 9/2279  | 144/18866 | 0.993168  | 0.9976816 | 0.9027377 | 9  | ITGB1BP1/SLC8A1/GJA5/HRH1/PER2/P2RX1/F2R/NPPC/AGTR1                                                                                                                                                      |
| Biological Process | GO:0019083 | viral transcription                                            | 12/2279 | 178/18866 | 0.9933304 | 0.9976816 | 0.9027377 | 12 | TRIM27/CTDP1/TRIM8/RAE1/POLR2F/CCL5/HDAC1/NUP93/SEC13/RSF1/USF2/RPL23A                                                                                                                                   |

|                    |            |                                                     |         |           |           |           |           |    |  |                                                                                                                                         |
|--------------------|------------|-----------------------------------------------------|---------|-----------|-----------|-----------|-----------|----|--|-----------------------------------------------------------------------------------------------------------------------------------------|
| Biological Process | GO:0007340 | acrosome reaction                                   | 1/2279  | 39/18866  | 0.9934373 | 0.9976816 | 0.9027377 | 1  |  | PLCB1                                                                                                                                   |
| Biological Process | GO:0030902 | hindbrain development                               | 10/2279 | 156/18866 | 0.9934812 | 0.9976816 | 0.9027377 | 10 |  | PHOX2A/DLL1/NCOA1/BCL2/TTC21B/ALDH1A2/HES3/TTL1/CPLANE1/COQ8B                                                                           |
| Biological Process | GO:0000154 | rRNA modification                                   | 1/2279  | 40/18866  | 0.9942317 | 0.9981187 | 0.9031332 | 1  |  | FBL                                                                                                                                     |
| Biological Process | GO:0000183 | rDNA heterochromatin assembly                       | 1/2279  | 40/18866  | 0.9942317 | 0.9981187 | 0.9031332 | 1  |  | H3C1                                                                                                                                    |
| Biological Process | GO:0032892 | positive regulation of organic acid transport       | 1/2279  | 40/18866  | 0.9942317 | 0.9981187 | 0.9031332 | 1  |  | MAP2K6                                                                                                                                  |
| Biological Process | GO:0042471 | ear morphogenesis                                   | 7/2279  | 123/18866 | 0.9943646 | 0.9981467 | 0.9031586 | 7  |  | ABR/SLC44A4/LRIG1/PAX2/FGFR1/TTC39C/BCR                                                                                                 |
| Biological Process | GO:0015980 | energy derivation by oxidation of organic compounds | 21/2279 | 278/18866 | 0.99482   | 0.9984923 | 0.9034713 | 21 |  | PRKAG2/SLC25A25/CBFA2T3/DHTKD1/OGDH/NDUFS2/NDUFS8/AIFM2/DYRK2/CAT/PPP1CB/PRDM16/ESRRB/PER2/NDUFB6/GFPT2/PCDH12/SDHD/SIRT3/ACADVL/RUBCNL |
| Biological Process | GO:2000272 | negative regulation of signaling receptor activity  | 2/2279  | 58/18866  | 0.9949191 | 0.9984923 | 0.9034713 | 2  |  | LY6G6D/CRHBP                                                                                                                            |
| Biological Process | GO:0006636 | unsaturated fatty acid biosynthetic process         | 2/2279  | 59/18866  | 0.9954661 | 0.9988302 | 0.9037771 | 2  |  | SCD/PRXL2B                                                                                                                              |

|                    |            |                                              |         |           |           |           |           |    |                                                                                 |
|--------------------|------------|----------------------------------------------|---------|-----------|-----------|-----------|-----------|----|---------------------------------------------------------------------------------|
| Biological Process | GO:0046605 | regulation of centrosome cycle               | 2/2279  | 59/18866  | 0.9954661 | 0.9988302 | 0.9037771 | 2  | POC1A/CEP295NL                                                                  |
| Biological Process | GO:0097755 | positive regulation of blood vessel diameter | 2/2279  | 60/18866  | 0.9959552 | 0.9992154 | 0.9041256 | 2  | GJA5/NPPC                                                                       |
| Biological Process | GO:0045333 | cellular respiration                         | 12/2279 | 187/18866 | 0.9964924 | 0.9996489 | 0.9045178 | 12 | SLC25A25/CBFA2T3/DHTKD1/OGDH/NDUFS2/NDUFS8/AIFM2/CAT/PRDM16/NDUFB6/SDHD/SIRT3   |
| Biological Process | GO:0034198 | cellular response to amino acid starvation   | 1/2279  | 45/18866  | 0.9969743 | 0.999987  | 0.9048237 | 1  | NPRL2                                                                           |
| Biological Process | GO:0006720 | isoprenoid metabolic process                 | 8/2279  | 144/18866 | 0.9973287 | 0.999987  | 0.9048237 | 8  | PNPLA2/IDI1/DHRS9/SDC2/RDH10/HMGCS1/ALDH1A2/DPAGT1                              |
| Biological Process | GO:0032309 | icosanoid secretion                          | 1/2279  | 46/18866  | 0.9973407 | 0.999987  | 0.9048237 | 1  | MAP2K6                                                                          |
| Biological Process | GO:0009451 | RNA modification                             | 10/2279 | 168/18866 | 0.9973883 | 0.999987  | 0.9048237 | 10 | THADA/RBM47/METTL6/FTO/CDKAL1/PUS7/DUS2/RBM15B/FBL/METTL8                       |
| Biological Process | GO:0050909 | sensory perception of taste                  | 2/2279  | 64/18866  | 0.9974434 | 0.999987  | 0.9048237 | 2  | LPO/GNAT2                                                                       |
| Biological Process | GO:0031424 | keratinization                               | 15/2279 | 225/18866 | 0.997461  | 0.999987  | 0.9048237 | 15 | CSTA/TGM5/KRT17/JUP/PKP1/PCSK6/CDH3/PERP/CNFN/KRTAP5-9/TGM3/KRT23/KAZN/KRT7/PPL |

|                    |            |                                                        |         |           |           |   |           |    |                                                                                                                                 |
|--------------------|------------|--------------------------------------------------------|---------|-----------|-----------|---|-----------|----|---------------------------------------------------------------------------------------------------------------------------------|
| Biological Process | GO:0001523 | retinoid metabolic process                             | 5/2279  | 108/18866 | 0.9977018 | 1 | 0.9048355 | 5  | PNPLA2/DHRS9/SDC2/RDH10/ALDH1A2                                                                                                 |
| Biological Process | GO:0042775 | mitochondrial ATP synthesis coupled electron transport | 4/2279  | 97/18866  | 0.998207  | 1 | 0.9048355 | 4  | NDUFS2/NDUFS8/NDUFB6/SDHD                                                                                                       |
| Biological Process | GO:0006721 | terpenoid metabolic process                            | 6/2279  | 124/18866 | 0.9982563 | 1 | 0.9048355 | 6  | PNPLA2/DHRS9/SDC2/RDH10/HMGCS1/ALDH1A2                                                                                          |
| Biological Process | GO:0042773 | ATP synthesis coupled electron transport               | 4/2279  | 98/18866  | 0.9983788 | 1 | 0.9048355 | 4  | NDUFS2/NDUFS8/NDUFB6/SDHD                                                                                                       |
| Biological Process | GO:0140029 | exocytic process                                       | 3/2279  | 84/18866  | 0.9984506 | 1 | 0.9048355 | 3  | VPS18/CTBP2/P2RX1                                                                                                               |
| Biological Process | GO:0042254 | ribosome biogenesis                                    | 22/2279 | 310/18866 | 0.9986004 | 1 | 0.9048355 | 22 | EXOSC2/WDR43/ZNF622/RCL1/USP36/DDX27/MTG2/WDR46/NOB1/ERI3/WDR55/RMRP/PIH1D1/NOP14/RPL23A/NOL6/FBL/ERCC2/RIOK1/ISG20/GEMIN4/UTP4 |
| Biological Process | GO:0016101 | diterpenoid metabolic process                          | 5/2279  | 114/18866 | 0.9987046 | 1 | 0.9048355 | 5  | PNPLA2/DHRS9/SDC2/RDH10/ALDH1A2                                                                                                 |
| Biological Process | GO:0022904 | respiratory electron transport chain                   | 5/2279  | 116/18866 | 0.9989324 | 1 | 0.9048355 | 5  | NDUFS2/NDUFS8/AIFM2/NDUFB6/SDHD                                                                                                 |
| Biological Process | GO:0006910 | phagocytosis, recognition                              | 3/2279  | 88/18866  | 0.9989934 | 1 | 0.9048355 | 3  | IGHV6-1/COLEC12/FCN1                                                                                                            |

|                    |            |                                               |         |           |           |   |           |    |                                                                                                                                                                                                                         |
|--------------------|------------|-----------------------------------------------|---------|-----------|-----------|---|-----------|----|-------------------------------------------------------------------------------------------------------------------------------------------------------------------------------------------------------------------------|
| Biological Process | GO:0042273 | ribosomal large subunit biogenesis            | 2/2279  | 74/18866  | 0.999199  | 1 | 0.9048355 | 2  | ZNF622/RPL23A                                                                                                                                                                                                           |
| Biological Process | GO:0022613 | ribonucleoprotein complex biogenesis          | 37/2279 | 482/18866 | 0.9994261 | 1 | 0.9048355 | 37 | EXOSC2/WDR43/SNRPD3/SRPK2/ZNF622/RCL1/AGO1/USP36/DDX27/AGO2/MTG2/WDR46/NOB1/SF1/EIF3M/PRPF8/ERI3/SFSWAP/WDR55/CELF2/NOL3/RMRP/CELF1/SNUPN/PIH1D1/NOP14/PRPF6/EIF3H/RUVBL1/RPL23A/NOL6/FBL/ERCC2/RIOK1/ISG20/GEMIN4/UTP4 |
| Biological Process | GO:0070972 | protein localization to endoplasmic reticulum | 7/2279  | 152/18866 | 0.9995589 | 1 | 0.9048355 | 7  | UBAC2/RTN4/MIA3/PMM2/ANK2/RPL23A/SPCS1                                                                                                                                                                                  |
| Biological Process | GO:0006958 | complement activation, classical pathway      | 6/2279  | 141/18866 | 0.9996449 | 1 | 0.9048355 | 6  | CD55/IGHV6-1/CLU/C1S/C1QB/C1RL                                                                                                                                                                                          |
| Biological Process | GO:0061640 | cytoskeleton-dependent cytokinesis            | 3/2279  | 100/18866 | 0.9997297 | 1 | 0.9048355 | 3  | CECR2/SNX18/SEPTIN9                                                                                                                                                                                                     |
| Biological Process | GO:0042255 | ribosome assembly                             | 1/2279  | 67/18866  | 0.9998234 | 1 | 0.9048355 | 1  | RPL23A                                                                                                                                                                                                                  |
| Biological Process | GO:0000281 | mitotic cytokinesis                           | 1/2279  | 72/18866  | 0.9999075 | 1 | 0.9048355 | 1  | SNX18                                                                                                                                                                                                                   |
| Biological Process | GO:0006119 | oxidative phosphorylation                     | 5/2279  | 149/18866 | 0.9999615 | 1 | 0.9048355 | 5  | NDUFS2/NDUFS8/NDUFB6/SDHD/ATP5PD                                                                                                                                                                                        |
| Biological Process | GO:0045047 | protein targeting to ER                       | 3/2279  | 120/18866 | 0.9999714 | 1 | 0.9048355 | 3  | PMM2/RPL23A/SPCS1                                                                                                                                                                                                       |

|                    |            |                                                                        |         |           |           |          |           |    |                                                                                                                                                                                                                                                                                                                                                                                                                                                                                        |
|--------------------|------------|------------------------------------------------------------------------|---------|-----------|-----------|----------|-----------|----|----------------------------------------------------------------------------------------------------------------------------------------------------------------------------------------------------------------------------------------------------------------------------------------------------------------------------------------------------------------------------------------------------------------------------------------------------------------------------------------|
| Biological Process | GO:0072599 | establishment of protein localization to endoplasmic reticulum         | 3/2279  | 124/18866 | 0.9999819 | 1        | 0.9048355 | 3  | PMM2/RPL23A/SPCS1                                                                                                                                                                                                                                                                                                                                                                                                                                                                      |
| Biological Process | GO:0006614 | SRP-dependent cotranslational protein targeting to membrane            | 1/2279  | 105/18866 | 0.9999987 | 1        | 0.9048355 | 1  | RPL23A                                                                                                                                                                                                                                                                                                                                                                                                                                                                                 |
| Biological Process | GO:0006613 | cotranslational protein targeting to membrane                          | 1/2279  | 109/18866 | 0.9999992 | 1        | 0.9048355 | 1  | RPL23A                                                                                                                                                                                                                                                                                                                                                                                                                                                                                 |
| Biological Process | GO:0007608 | sensory perception of smell                                            | 5/2279  | 452/18866 | 1         | 1        | 0.9048355 | 5  | SLC24A4/NCAM2/OR52N2/CNGA4/B3GNT2                                                                                                                                                                                                                                                                                                                                                                                                                                                      |
| Biological Process | GO:0050907 | detection of chemical stimulus involved in sensory perception          | 3/2279  | 472/18866 | 1         | 1        | 0.9048355 | 3  | LPO/GNAT2/OR52N2                                                                                                                                                                                                                                                                                                                                                                                                                                                                       |
| Biological Process | GO:0050911 | detection of chemical stimulus involved in sensory perception of smell | 1/2279  | 427/18866 | 1         | 1        | 0.9048355 | 1  | OR52N2                                                                                                                                                                                                                                                                                                                                                                                                                                                                                 |
| Cellular Component | GO:0042581 | specific granule                                                       | 52/2341 | 160/19559 | 5.63E-12  | 6.53E-09 | 5.85E-09  | 52 | MS4A3/DEFA4/ELANE/LRG1/SLPI/TRPM2/CTS2/TIMP2/PLAU/SLC2A5/KCNAB2/OLR1/C3AR1/LCN2/TOLLIP/UBR4/CHI3L1/TMEM30A/CD177/TNFRSF1B/TSPAN14/PLD1/ORMDL3/FOLR3/FPR2/ATP8A1/CLEC5A/CTSD/JUP/CHIT1/SLC15A4/ATP11A/RAB27A/PTPN6/PTPRJ/CD59/PGLYRP1/OLFM4/LAIR1/ITGB2/PDXK/ATP8B4/P2RX1/LTF/ANO6/SPTAN1/DOCK2/CYFIP1/CD33/CEACAM3/ADGRG3/CRACR2A                                                                                                                                                      |
| Cellular Component | GO:0030667 | secretory granule membrane                                             | 76/2341 | 306/19559 | 2.95E-10  | 1.71E-07 | 1.53E-07  | 76 | MS4A3/AZU1/TRPM2/BSG/PLAU/SLC2A5/KCNAB2/CD9/OLR1/ACRBP/C3AR1/APLP2/ITPR2/UBR4/LPCAT1/SIRPB1/CD55/TMEM30A/CD177/SLC11A1/CLEC4C/TNFRSF1B/DOK3/RAP1B/CEACAM6/RAB5C/RHOG/RAB5B/TSPAN14/PLD1/RAB31/ORMDL3/FPR2/FPR1/ATP8A1/MGAM/CLEC5A/LY6G6F/ITPR1/HLA-C/BRI3/PKP1/SLC15A4/RHOF/ATP11A/RAB27A/ITGA2B/PHACTR2/CPNE1/PTPRN2/PTPRJ/CD59/ITGB3/PTPRC/CXCR1/LHFPL2/LAIR1/ITGB2/ATP8B4/P2RX1/PLA1A/CD68/TMED2/ANO6/CD33/RPH3AL/ANXA7/SVIP/CEACAM3/ADGRG3/STING1/IRAG2/ATP6V0C/ACP3/VPS35L/ADGRE3 |
| Cellular Component | GO:0070820 | tertiary granule                                                       | 45/2341 | 164/19559 | 5.42E-08  | 2.10E-05 | 1.88E-05  | 45 | LRG1/TRPM2/CDA/TIMP2/PLAU/KCNAB2/OLR1/UBR4/CD55/CD177/SLC11A1/CLEC4C/DOK3/TSPAN14/PLD1/FOLR3/FPR2/FPR1/MGAM/CLEC5A/CTSD/CHIT1/PKP1/ATP11A/CTSH/PTPN6/TNFAIP6/PTPRN2/HBB/CD59/PGLYRP1/OLFM4/LAIR1/ITGB2/ATP8B4/LTF/ANO6/SPTAN1/CYFIP1/CD33/DBNL/SVIP/ATP6V0C/VPS35L/ADGRE3                                                                                                                                                                                                              |



|                    |            |                           |         |           |          |           |           |    |                                                                                                                                                                                                                                                                                                                                                                                                                                                                                                                                                                                             |
|--------------------|------------|---------------------------|---------|-----------|----------|-----------|-----------|----|---------------------------------------------------------------------------------------------------------------------------------------------------------------------------------------------------------------------------------------------------------------------------------------------------------------------------------------------------------------------------------------------------------------------------------------------------------------------------------------------------------------------------------------------------------------------------------------------|
| Cellular Component | GO:0035580 | specific granule lumen    | 23/2341 | 62/19559  | 3.12E-07 | 7.42E-05  | 6.65E-05  | 23 | DEFA4/ELANE/LRG1/SLPI/CTSZ/TIMP2/LCN2/TOLLIP/CHI3L1/FOLR3/CTSD/JUP/CHIT1/RAB27A/PTPN6/PGLYRP1/OLFM4/PDXK/LTF/SPTAN1/DOCK2/CYFIP1/CRACR2A                                                                                                                                                                                                                                                                                                                                                                                                                                                    |
| Cellular Component | GO:0001726 | ruffle                    | 46/2341 | 179/19559 | 3.20E-07 | 7.42E-05  | 6.65E-05  | 46 | KSR1/GSN/FGD4/KANK1/TLN2/ITGB1BP1/ACAP2/ARHGEF7/WIPF1/CTTN/DNM2/MEFV/FGR/CAPG/FGD5/SPATA13/PACIN2/TESC/MYH9/BAIAP2/ACTN1/ATP6V1B2/FRMD4B/SCIMP/PTPRJ/SH3YL1/EPSS8L3/EPSS8L1/MYO5A/MTSS1/SH2D3C/ITGB3/INPP5E/PDE9A/NCKAP1/CORO1C/ARHGEF2/MYO1C/PDGFRB/FSCN3/PLCG1/CYFIP1/EZR/MYADM/DBNL/ARHGAP45                                                                                                                                                                                                                                                                                             |
| Cellular Component | GO:0035579 | specific granule membrane | 29/2341 | 91/19559  | 4.21E-07 | 8.14E-05  | 7.29E-05  | 29 | MS4A3/TRPM2/PLAU/SLC2A5/KCNAB2/OLR1/C3AR1/UBR4/TMEM30A/CD177/TNFRSF1B/TSPAN14/PLD1/ORMDL3/FPR2/ATP8A1/CLEC5A/SLC15A4/ATP11A/PTPRJ/CD59/LAIR1/ITGB2/ATP8B4/P2RX1/ANO6/CD33/CEACAM3/ADGRG3                                                                                                                                                                                                                                                                                                                                                                                                    |
| Cellular Component | GO:0034774 | secretory granule lumen   | 69/2341 | 322/19559 | 9.09E-07 | 0.0001507 | 0.0001351 | 69 | DEFA4/AZU1/ELANE/LRG1/S100P/SLPI/CTSZ/PRTN3/S100A8/CTSG/VAT1/CDA/TIMP2/MPO/AMPD3/SERPINA1/GSN/LCN2/TOLLIP/RNASE3/HEXB/CRISPLD2/CHI3L1/GALNS/FGR/COTL1/FOLR3/DYNC1H1/MNDA/PADI2/CTSD/JUP/CHIT1/THBS1/CTSH/TUBB4B/RAB27A/ACTN1/APP/PTPN6/ACTN4/CLU/PGAM1/TGFB1/FCN1/PGLYRP1/CREG1/OLFM4/GHRL/CAB39/GRN/PDGFB/CAT/PNP/PDXK/ARSB/PKM/PSMB7/LTF/SPTAN1/DOCK2/CYFIP1/GMFG/PSMD13/IMPDI1/DBNL/ARHGAP45/CYRIB/CRACR2A                                                                                                                                                                               |
| Cellular Component | GO:0060205 | cytoplasmic vesicle lumen | 69/2341 | 326/19559 | 1.45E-06 | 0.0002105 | 0.0001887 | 69 | DEFA4/AZU1/ELANE/LRG1/S100P/SLPI/CTSZ/PRTN3/S100A8/CTSG/VAT1/CDA/TIMP2/MPO/AMPD3/SERPINA1/GSN/LCN2/TOLLIP/RNASE3/HEXB/CRISPLD2/CHI3L1/GALNS/FGR/COTL1/FOLR3/DYNC1H1/MNDA/PADI2/CTSD/JUP/CHIT1/THBS1/CTSH/TUBB4B/RAB27A/ACTN1/APP/PTPN6/ACTN4/CLU/PGAM1/TGFB1/FCN1/PGLYRP1/CREG1/OLFM4/GHRL/CAB39/GRN/PDGFB/CAT/PNP/PDXK/ARSB/PKM/PSMB7/LTF/SPTAN1/DOCK2/CYFIP1/GMFG/PSMD13/IMPDI1/DBNL/ARHGAP45/CYRIB/CRACR2A                                                                                                                                                                               |
| Cellular Component | GO:0031983 | vesicle lumen             | 69/2341 | 328/19559 | 1.83E-06 | 0.0002353 | 0.0002109 | 69 | DEFA4/AZU1/ELANE/LRG1/S100P/SLPI/CTSZ/PRTN3/S100A8/CTSG/VAT1/CDA/TIMP2/MPO/AMPD3/SERPINA1/GSN/LCN2/TOLLIP/RNASE3/HEXB/CRISPLD2/CHI3L1/GALNS/FGR/COTL1/FOLR3/DYNC1H1/MNDA/PADI2/CTSD/JUP/CHIT1/THBS1/CTSH/TUBB4B/RAB27A/ACTN1/APP/PTPN6/ACTN4/CLU/PGAM1/TGFB1/FCN1/PGLYRP1/CREG1/OLFM4/GHRL/CAB39/GRN/PDGFB/CAT/PNP/PDXK/ARSB/PKM/PSMB7/LTF/SPTAN1/DOCK2/CYFIP1/GMFG/PSMD13/IMPDI1/DBNL/ARHGAP45/CYRIB/CRACR2A                                                                                                                                                                               |
| Cellular Component | GO:0005911 | cell-cell junction        | 92/2341 | 493/19559 | 8.74E-06 | 0.0010133 | 0.0009085 | 92 | PRKCZ/TBCD/LAT/COL17A1/CADM3/TJP2/SHROOM3/YWHAH/UBN1/FXYD1/CRB1/NDRG1/PIK3R1/RAP1B/SLC8A1/FRMD4A/GJA5/ABCC2/PRICKLE4/PACIN2/JUP/BAIAP2L1/PKP1/CD42EP1/PDLIM2/MYH9/PMP22/BAIAP2/AHNAK/DLL1/ACTN1/APP/PTPN6/ACTN4/ILK/LIMD1/SMAD7/PXN/FRMD4B/PLEKHG5/SCN1A/CDH3/MLC1/PTPRJ/TMOD3/RAPGEF2/PLEKHA7/VAMP5/PERP/EPB41L3/KIRREL3/JAM3/ITGB3/ACTG1/CSK/GRHL2/WDR1/PRKCI/GJB3/SDDCAG8/CDH1/ADD1/MPP7/NOTCH1/AQP3/ARHGAP17/ARHGEF2/CNTNAP1/PCDH12/SLC2A1/KAZN/PDLIM4/ANK2/CDC42BPB/SHROOM1/FRMD6/PLCG1/CADM1/CDH11/PTPRU/KIFC3/BAIAP2L2/FLOT1/MYADM/SPTBN4/SYNPO/NPHP4/PPL/JAML/NECTIN1/NECTIN4/PLPP3 |
| Cellular Component | GO:0031252 | cell leading edge         | 80/2341 | 421/19559 | 1.69E-05 | 0.001787  | 0.0016021 | 80 | PRKCZ/KSR1/P4HB/PARVB/SSH1/GSN/FGD4/KANK1/TLN2/APBB2/CD177/PSTPIP1/ITGB1BP1/AAK1/MYLK/ACAP2/ARHGEF7/WIPF1/CTTN/DNM2/MEFV/FGR/CAPG/DUSP22/FGD5/ARHGAP31/ITSN1/SPATA13/PACIN2/TESC/MYH9/BAIAP2/ACTN1/APP/ATP6V1B2/ILK/ABLIM3/AKAP5/PXN/DOCK8/FRMD4B/SCIMP/PLEKHG5/WASL/FER/PTPRJ/SH3YL1/EPSS8L3/EPSS8L1/MYO5A/EPB41L3/SLC1A2/MTSS1/SH2D3C/ITGB3/INPP5E/PALM/PDE9A/PRKCI/NCKAP1/CDH1/CORO1C/AVIL/ARHGEF2/MYO1C/PDGFRB/FSCN3/DYSF/PDLIM4/CDC42BPB/PLCG1/CYFIP1/ABLIM1/NDEL1/EZR/FLOT1/LMO4/MYADM/DBNL/ARHGAP45                                                                                  |
| Cellular Component | GO:0005769 | early endosome            | 73/2341 | 377/19559 | 2.03E-05 | 0.0018184 | 0.0016303 | 73 | TRIM27/EHD1/LMTK2/SORL1/MGRN1/SORCS2/ANKFY1/TM9SF4/VAC14/LNPEP/TBC1D16/TGFBRAP1/RAB5C/RAB5B/LDLRAD4/RAB31/SNX27/FGD5/RIN3/SLC11A2/PACIN2/HLA-C/RABGEF1/RUSC1/ACKR2/ANKRD13B/ATP11A/INPP4A/SNX3/VPS26B/APP/HLA-F/OSBP6/DERL2/UVRAG/TMEM163/NISCH/PHB/MLC1/RABGAP1L/LITAF/MYO5A/VPS18/HTT/NUMB/SH3GL1/KREMEN2/KCNQ1/SORT1/PI4K2A/NTRK1/ASTN2/PLD3/F2R/WDFY1/EPSS5/LTF/DYSF/RUFY1/WDR81/HPS6/PDLIM4/RNF11/ANK2/PARM1/INPP5E/FLOT1/ZFYVE9/DBNL/MARCHF3/PHETA1/MARCHF8/ACKR1                                                                                                                     |

|                    |            |                                     |         |           |           |           |           |    |                                                                                                                                                                                                                                                                                                                                                                                                                                                                              |
|--------------------|------------|-------------------------------------|---------|-----------|-----------|-----------|-----------|----|------------------------------------------------------------------------------------------------------------------------------------------------------------------------------------------------------------------------------------------------------------------------------------------------------------------------------------------------------------------------------------------------------------------------------------------------------------------------------|
| Cellular Component | GO:0019898 | extrinsic component of membrane     | 62/2341 | 306/19559 | 2.04E-05  | 0.0018184 | 0.0016303 | 62 | AZU1/MGLL/KCNAB2/PIK3CD/LCK/ULK1/VAC14/VPS13D/PAM16/AAK1/PIK3R1/PIK3R6/FGR/CDH23/FOLR3/WIPI2/GNAZ/PACSIN2/JUP/SLA/PIK3R5/GNAI2/RGS6/SMAD7/KCNIP1/GNAT2/CDH3/FARP1/FER/FCN1/GNG7/DEFB1/BLK/ATG14/GNA11/NUMB/GNB3/CDH4/NUMA1/CNR2/SNX18/CDH1/MICALL1/GNG2/RPH3A/GNAO1/GNA12/TGM3/WDR81/GRAMD1A/CYLD/EPN3/ESYT1/CDH11/EZR/RNF40/ASPSCR1/COQ4/TEPSIN/GRAMD2A/COQ8B/SLA2                                                                                                          |
| Cellular Component | GO:0070821 | tertiary granule membrane           | 22/2341 | 73/19559  | 2.73E-05  | 0.0022613 | 0.0020273 | 22 | TRPM2/PLAU/KCNAB2/OLR1/UBR4/CD177/SLC11A1/CLEC4C/TSPAN14/PLD1/FPR2/MGAM/CLEC5A/ATP11A/CD59/LAIR1/ITGB2/ATP8B4/ANO6/CD33/SVIP/ATP6VOC                                                                                                                                                                                                                                                                                                                                         |
| Cellular Component | GO:0005925 | focal adhesion                      | 78/2341 | 415/19559 | 3.19E-05  | 0.0024641 | 0.0022092 | 78 | P4HB/PARVB/BSG/CALR/PLAU/SNTB2/CD9/GSN/TLN2/TNS3/AFAP1/ARHGAP26/RHOG/ARHGEF7/CTTN/DNM2/ANXA6/ARHGAP31/PACSIN2/JUP/CDC42EP1/TNS1/SLA/MYH9/GIT1/AHNAK/ACTN1/ITGA2B/ACTN4/ILK/LIMD1/SLC9A3R2/PXN/FLT1/ITGB5/PPFIA1/JAK1/LMO7/SVIL/PFN1/TGFB11/CD59/NUMB/ITGB3/PTPRC/ACTG1/MPZL1/CAT/PPP1CB/CASS4/SNTB1/ENG/ITGB2/NCKAP1/RALA/YWHAZ/ADD1/PI4KA/CORO1C/PARVG/AVIL/FHL2/GNA12/FLII/ARHGEF2/BCAR3/THSD1/PDGFRB/RSU1/IRF2/CYFIP1/YWHAQ/EZR/LPP/FLOT1/ITGB6/PRA<br>G1/ATP6VOC         |
| Cellular Component | GO:0030055 | cell-substrate junction             | 79/2341 | 423/19559 | 3.57E-05  | 0.00259   | 0.002322  | 79 | P4HB/PARVB/BSG/CALR/PLAU/SNTB2/CD9/COL17A1/GSN/TLN2/TNS3/AFAP1/ARHGAP26/RHOG/ARHGEF7/CTTN/DNM2/ANXA6/ARHGAP31/PACSIN2/JUP/CDC42EP1/TNS1/SLA/MYH9/GIT1/AHNAK/ACTN1/ITGA2B/ACTN4/ILK/LIMD1/SLC9A3R2/PXN/FLT1/ITGB5/PPFIA1/JAK1/LMO7/SVIL/PFN1/TGFB11/CD59/NUMB/ITGB3/PTPRC/ACTG1/MPZL1/CAT/PPP1CB/CASS4/SNTB1/ENG/ITGB2/NCKAP1/RALA/YWHAZ/ADD1/PI4KA/CORO1C/PARVG/AVIL/FHL2/GNA12/FLII/ARHGEF2/BCAR3/THSD1/PDGFRB/RSU1/IRF2/CYFIP1/YWHAQ/EZR/LPP/FLOT1/ITGB6/PRA<br>G1/ATP6VOC |
| Cellular Component | GO:0005884 | actin filament                      | 30/2341 | 118/19559 | 4.24E-05  | 0.0028936 | 0.0025943 | 30 | GAS7/MYO18B/AKAP13/MYO9B/PSTPIP1/WIPF1/CTTN/COTL1/DUSP22/PRICKLE4/PDLIM2/ACKR2/ACTN1/WASL/MYO5A/VPS18/JAM3/ESPN/ACTG1/NCKAP1/AVIL/MYO1C/PDLIM4/TMOD1/MARK2/EZR/SMTN/SPTBN4/DAPK3/DBNL                                                                                                                                                                                                                                                                                        |
| Cellular Component | GO:0009898 | cytoplasmic side of plasma membrane | 37/2341 | 164/19559 | 9.52E-05  | 0.0061321 | 0.0054978 | 37 | KCNAB2/LCK/FGR/TRAF2/TRAF1/GNAZ/JUP/SLA/GNAI2/RASA3/KCNIP1/AKAP5/GNAT2/FARP1/FER/LITAF/GNG7/BLK/GNA11/PTPRC/GNB3/PALM/CNR2/SNX18/SPTA1/CDH1/GNG2/GNAO1/GNA12/TGM3/GRAMD1A/CYLD/ESYT1/EZR/ASPSCR1/C2CD2L/GRAMD2A                                                                                                                                                                                                                                                              |
| Cellular Component | GO:0030027 | lamellipodium                       | 43/2341 | 201/19559 | 0.0001006 | 0.0061444 | 0.0055088 | 43 | P4HB/PARVB/SSH1/GSN/FGD4/APBB2/CD177/PSTPIP1/ITGB1BP1/MYLK/ARHGEF7/CTTN/DNM2/MEFV/CAPG/DUSP22/FGD5/ARHGAP31/ITSN1/SPATA13/TESC/APP/ILK/ABLIM3/PXN/DOCK8/PLEKHG5/WASL/FER/ITGB3/NCKAP1/CDH1/CORO1C/AVIL/FSCN3/DYSF/PDLIM4/CDC42BPB/PLCG1/CYFIP1/ABLIM1/FLOT1/DBNL                                                                                                                                                                                                             |
| Cellular Component | GO:0098857 | membrane microdomain                | 63/2341 | 330/19559 | 0.0001112 | 0.0062765 | 0.0056272 | 63 | PRTN3/PRKCZ/LAT/SYNJ2/BSG/KCNE1/HK1/OLR1/ADCY2/LCK/CD55/INPP5D/CD177/ANGPT1/FXYD1/TNFRSF1B/TNF/TRAF2/CTSD/PACSIN2/TGFB2/UNC5B/AHNAK/DLL1/RIPK1/CD226/GNAI2/APP/NOS1AP/TNFRSF1A/AKAP5/ARID3A/MLC1/CD79A/SLC1A2/PTPRC/CSK/ABCA1/BCL10/KCNQ1/ITGB2/NPC1/PI4K2A/CDH1/ADD1/CORO1C/P2RX1/PPP2R1B/F2R/EFHD2/MYO1C/SLC2A1/DYSF/ANK2/ADTRP/EZR/PDZK1/FLOT1/MYADM/LTB4R/FADD/DAPK3/PLPP3                                                                                               |
| Cellular Component | GO:0016323 | basolateral plasma membrane         | 50/2341 | 246/19559 | 0.0001136 | 0.0062765 | 0.0056272 | 50 | TACSTD2/AP2A1/TGFA/SLC51A/ABCC1/SLC16A3/SLC10A1/MAP7/SLC1A5/LPO/ARRB1/TLR9/OSCP1/SLC2A9/C5AR2/P2RY6/MLC1/SLC19A1/SLC26A1/AQP1/MUC20/SLC7A7/SLC7A5/NUMB/IL6R/PDGFB/PALM/KCNQ1/ARRB2/SLC16A1/CNNM2/SLC1A3/NOD2/AQP3/EPS15/MYO1C/SLC2A1/SLC7A8/ANK2/SLC29A1/CADM1/ATP7B/EZR/FLOT1/SLC7A1/SLC23A1/SLC41A1/AQP9/CEACAM5/PLPP3                                                                                                                                                     |

|                    |            |                              |         |           |           |           |           |    |                                                                                                                                                                                                                                                                                                                                                                                                                                                                                                 |
|--------------------|------------|------------------------------|---------|-----------|-----------|-----------|-----------|----|-------------------------------------------------------------------------------------------------------------------------------------------------------------------------------------------------------------------------------------------------------------------------------------------------------------------------------------------------------------------------------------------------------------------------------------------------------------------------------------------------|
| Cellular Component | GO:0045121 | membrane raft                | 62/2341 | 329/19559 | 0.0001825 | 0.0094172 | 0.008443  | 62 | PRTN3/PRKCZ/LAT/SYNJ2/BSG/KCNE1/HK1/OLR1/ADCY2/LCK/CD55/INPP5D/CD177/ANGPT1/FXYD1/TNFRSF1B/TNF/TRAF2/CTSD/PACSIN2/TGFBR2/UNC5B/AHNAK/DLL1/RIPK1/CD26/GNAI2/APP/NOS1AP/TNFRSF1A/AKAP5/ARID3A/MLC1/CD79A/SLC1A2/PTPRC/CSK/ABCA1/BCL10/KCNQ1/ITGB2/NPC1/PI4K2A/CDH1/ADD1/CORO1C/P2RX1/PPP2R1B/F2R/EFHD2/MYO1C/SLC2A1/ANK2/ADTRP/EZR/PDZK1/FLOT1/MYADM/LTB4R/FADD/DAPK3/PLPP3                                                                                                                       |
| Cellular Component | GO:0098589 | membrane region              | 64/2341 | 343/19559 | 0.0001937 | 0.0094172 | 0.008443  | 64 | PRTN3/PRKCZ/LAT/SYNJ2/BSG/KCNE1/HK1/OLR1/ADCY2/LCK/CD55/INPP5D/CD177/ANGPT1/FXYD1/TNFRSF1B/TNF/TRAF2/CTSD/PACSIN2/TGFBR2/UNC5B/AHNAK/DLL1/RIPK1/CD26/GNAI2/APP/NOS1AP/TNFRSF1A/AKAP5/ARID3A/MLC1/BICD2/CD79A/SLC1A2/PTPRC/CSK/ABCA1/BCL10/KCNQ1/ITGB2/NPC1/PI4K2A/CDH1/ADD1/CORO1C/P2RX1/PPP2R1B/F2R/EFHD2/MYO1C/SLC2A1/DYSF/ANK2/ADTRP/EZR/PDZK1/FLOT1/MYADM/LTB4R/FADD/DAPK3/PLPP3                                                                                                            |
| Cellular Component | GO:0098562 | cytoplasmic side of membrane | 40/2341 | 188/19559 | 0.0001948 | 0.0094172 | 0.008443  | 40 | KCNAB2/THADA/LCK/FGR/TRAF2/TRAF1/GNAZ/JUP/SLA/HM13/GNAI2/RASA3/KCNIP1/AKAP5/GNAT2/FARP1/FER/LITAF/GNG7/CDIP1/BLK/GNA11/PTPRC/GNB3/PALM/CNR2/SNX18/SPTA1/CDH1/GNG2/GNAO1/GNA12/TGM3/GRAMD1A/CYLD/ESYT1/EZR/ASPSCR1/C2CD2L/GRAMD2A                                                                                                                                                                                                                                                                |
| Cellular Component | GO:0005774 | vacuolar membrane            | 76/2341 | 427/19559 | 0.0002434 | 0.0109753 | 0.0098399 | 76 | AZU1/TRPM2/HLA-DMB/RPTOR/AP2A1/CLCN6/C3AR1/ANKFY1/ULK1/VAC14/RAB2A/LPCAT1/TMEM30A/LNPEP/RAP1B/CEACAM6/RAB5C/SLC29A3/ARRB1/PLD1/GPLD1/RHEB/ANXA6/FPR1/TLR9/ATP8A1/CTSD/SLC11A2/BRI3/SLC15A4/ATP11A/AHNAK/HLA-F/ATP6V1B2/UVRAG/CPNE1/AP1B1/SPHK2/TMEM150B/LITAF/AP5S1/GIMAP5/VPS18/CDIP1/CLEC16A/SLC7A5/ATG14/GNA11/SEC13/ITM2C/GRN/PLEKHM1/TPCN2/SORT1/NPC1/FNIP2/PI4K2A/VMP1/ATP6V0B/PLD3/OSTM1/ABCC11/CD68/WDR81/HPS6/AP3D1/CLN5/FLOT1/NPRL2/MARCHF8/STING1/IRAG2/ATP6V0C/ATP6V1C1/ACP3/RUBCNL |
| Cellular Component | GO:0055037 | recycling endosome           | 40/2341 | 190/19559 | 0.000246  | 0.0109753 | 0.0098399 | 40 | EHD1/LMTK2/SORL1/SORCS2/VPS53/ULK1/NDRG1/RAB11FIP1/TNF/ABCG1/ITSN1/SLC11A2/PACSIN2/HLA-C/RABGEF1/TNIK/ACKR2/ATP11A/INPP4A/ZDHHC2/APP/HLA-F/AKAP5/NISCH/MLC1/DENND6B/MYO5A/TBC1D14/NTRK1/MICALL1/LTF/PDLIM4/RNF11/ANK2/AVL9/INPP5F/VPS51/PHETA1/ACKR1/DENND2B                                                                                                                                                                                                                                    |
| Cellular Component | GO:0101002 | ficolin-1-rich granule       | 29/2341 | 124/19559 | 0.0002727 | 0.0112982 | 0.0101294 | 29 | LRG1/CTSZ/CDA/TIMP2/AMPD3/SERPINA1/GSN/CRISPLD2/COTL1/MNDA/CTSD/JUP/CTSH/TNFAIP6/PGAM1/HBB/FCN1/CAB39/CTSB/CAT/PNP/ARSB/PKM/PSMB7/GMFG/PSMD13/CDK13/IMPDH1/DBNL                                                                                                                                                                                                                                                                                                                                 |
| Cellular Component | GO:1904813 | ficolin-1-rich granule lumen | 29/2341 | 124/19559 | 0.0002727 | 0.0112982 | 0.0101294 | 29 | LRG1/CTSZ/CDA/TIMP2/AMPD3/SERPINA1/GSN/CRISPLD2/COTL1/MNDA/CTSD/JUP/CTSH/TNFAIP6/PGAM1/HBB/FCN1/CAB39/CTSB/CAT/PNP/ARSB/PKM/PSMB7/GMFG/PSMD13/CDK13/IMPDH1/DBNL                                                                                                                                                                                                                                                                                                                                 |
| Cellular Component | GO:0005766 | primary lysosome             | 34/2341 | 155/19559 | 0.0003139 | 0.012137  | 0.0108814 | 34 | DEFA4/AZU1/ELANE/PRTN3/CTSG/VAT1/MPO/C3AR1/TOLLIP/RNASE3/HEXB/LPCAT1/GALNS/TMEM30A/RAP1B/CEACAM6/RAB5C/DYNC1H1/FPR1/ATP8A1/MNDA/PADI2/BRI3/TUBB4B/CPNE1/CREG1/GRN/ARSB/CD68/IMPDH1/ARHGAP45/IRAG2/ATP6V0C/ACP3                                                                                                                                                                                                                                                                                  |
| Cellular Component | GO:0042582 | azurophil granule            | 34/2341 | 155/19559 | 0.0003139 | 0.012137  | 0.0108814 | 34 | DEFA4/AZU1/ELANE/PRTN3/CTSG/VAT1/MPO/C3AR1/TOLLIP/RNASE3/HEXB/LPCAT1/GALNS/TMEM30A/RAP1B/CEACAM6/RAB5C/DYNC1H1/FPR1/ATP8A1/MNDA/PADI2/BRI3/TUBB4B/CPNE1/CREG1/GRN/ARSB/CD68/IMPDH1/ARHGAP45/IRAG2/ATP6V0C/ACP3                                                                                                                                                                                                                                                                                  |

|                    |            |                                                               |         |           |           |           |           |    |                                                                                                                                                                                                                                                                                                                                                               |
|--------------------|------------|---------------------------------------------------------------|---------|-----------|-----------|-----------|-----------|----|---------------------------------------------------------------------------------------------------------------------------------------------------------------------------------------------------------------------------------------------------------------------------------------------------------------------------------------------------------------|
| Cellular Component | GO:0033116 | endoplasmic reticulum-Golgi intermediate compartment membrane | 20/2341 | 75/19559  | 0.0003912 | 0.0146386 | 0.0131243 | 20 | CTSZ/CALR/SERPINA1/TGFA/STX5/CSNK1D/SLC35C2/RAB2A/CD55/LMAN2/WHAMM/YIF1A/ERGIC1/CNIH2/CD59/VMP1/TMED2/ASPSR1/STING1/PLPP3                                                                                                                                                                                                                                     |
| Cellular Component | GO:0030139 | endocytic vesicle                                             | 58/2341 | 313/19559 | 0.0004515 | 0.0163667 | 0.0146736 | 58 | ELANE/CPNE6/EHD1/MPO/CALR/AP2A1/CD9/GSN/SLC11A1/NCF4/RAB5C/RAB5B/RAB11FIP1/HEATR5A/PLD1/DNM2/RAB31/SFTPD/TLR9/ITSN1/HLA-C/SNX3/VPS26B/HLA-F/FMNL1/COLEC12/NCF2/UVRAG/ITGB5/SCIMP/PLEKHG5/WASL/NOSTRIN/MARCO/STAB2/RAPGEF2/EPN2/HBB/RAB43/MTSS1/PGLYRP1/ATG14/ACTG1/WNT5B/ABCA1/MPEG1/ARRB2/RALA/NOD2/LPAR2/ATP6V0B/EPS15/LTF/MYO1C/DYSF/INPP5F/CLTCL1/ATP6VOC |
| Cellular Component | GO:0031234 | extrinsic component of cytoplasmic side of plasma membrane    | 24/2341 | 99/19559  | 0.0005092 | 0.0171087 | 0.0153388 | 24 | KCNAB2/LCK/FGR/GNAZ/SLA/GNAI2/KCNIP1/GNAT2/FARP1/FER/GNG7/BLK/GNA11/GNB3/CNR2/SNX18/GNG2/GNAO1/GNA12/TGM3/GRAMD1A/CYLD/ESYT1/GRAMD2A                                                                                                                                                                                                                          |
| Cellular Component | GO:1904724 | tertiary granule lumen                                        | 16/2341 | 55/19559  | 0.0005133 | 0.0171087 | 0.0153388 | 16 | LRG1/CDA/TIMP2/FOLR3/CTSD/CHIT1/CTSH/PTPN6/TNFAIP6/HBB/PGLYRP1/OLFM4/LTF/SPTAN1/CYFIP1/DBNL                                                                                                                                                                                                                                                                   |
| Cellular Component | GO:0005905 | clathrin-coated pit                                           | 19/2341 | 71/19559  | 0.0005162 | 0.0171087 | 0.0153388 | 19 | AP2A1/AAK1/ARRB1/CTTN/DNM2/ITSN1/APP/EPS15L1/LRP10/NUMB/SH3BP4/DGKD/ARRB2/SORT1/DNM1L/EPS15/EPN3/INPP5F/CLTCL1                                                                                                                                                                                                                                                |
| Cellular Component | GO:0019897 | extrinsic component of plasma membrane                        | 36/2341 | 172/19559 | 0.0005484 | 0.017672  | 0.0158439 | 36 | KCNAB2/LCK/AAK1/FGR/CDH23/GNAZ/JUP/SLA/GNAI2/SMAD7/KCNIP1/GNAT2/CDH3/FARP1/FER/FCN1/GNG7/BLK/GNA11/NUMB/GNB3/CDH4/NUMA1/CNR2/SNX18/CDH1/GNG2/GNAO1/GNA12/TGM3/GRAMD1A/CYLD/EPN3/ESYT1/CDH11/GRAMD2A                                                                                                                                                           |
| Cellular Component | GO:0030863 | cortical cytoskeleton                                         | 25/2341 | 106/19559 | 0.000611  | 0.0191545 | 0.017173  | 25 | MAEA/GSN/MYRIP/SHROOM3/AKAP13/CTTN/COTL1/MYH9/ACTN4/WASL/PRKCB/NUMA1/WDR1/SPTA1/CDH1/SLC2A1/SPTAN1/SHROOM1/EPB42/TMOD1/EZR/FLOT1/MYADM/SPTBN4/DBNL                                                                                                                                                                                                            |
| Cellular Component | GO:0009925 | basal plasma membrane                                         | 15/2341 | 51/19559  | 0.0006695 | 0.0204388 | 0.0183244 | 15 | TACSTD2/ABCC1/SLC1A5/OSCP1/C5AR2/AQP1/MUC20/SLC7A5/SLC16A1/SLC1A3/EPS15/MYO1C/SLC7A8/SLC7A1/SLC23A1                                                                                                                                                                                                                                                           |
| Cellular Component | GO:0005938 | cell cortex                                                   | 56/2341 | 305/19559 | 0.0007053 | 0.0209777 | 0.0188076 | 56 | MAEA/CTSZ/PRKCZ/DCTN1/ENO1/GSN/ITPR2/MYRIP/RHOH/SHROOM3/AKAP13/MYO9B/RHOG/ARHGEF7/CTTN/COTL1/TRAF2/DYNC1H1/MICAL3/MYH9/RHOH/FMNL1/ACTN4/FRYL/PXN/WASL/FER/RHOB2/PRKCB/CTBP1/PFN1/CTBP2/AGTRAP/NUMA1/WDR1/SPTA1/CDH1/ASTN2/CORO1C/CABP1/NEDD4/SLC2A1/SPTAN1/SHROOM1/ASPH/EPB42/TMOD1/EZR/FLOT1/MYADM/SPTBN4/C2CD2L/DBNL/SEPTIN9/STIMATE/DENND2B                |

|                    |            |                                      |         |           |           |           |           |    |                                                                                                                                                                                                                                                                                                                                                                                                                                                   |
|--------------------|------------|--------------------------------------|---------|-----------|-----------|-----------|-----------|----|---------------------------------------------------------------------------------------------------------------------------------------------------------------------------------------------------------------------------------------------------------------------------------------------------------------------------------------------------------------------------------------------------------------------------------------------------|
| Cellular Component | GO:0031094 | platelet dense tubular network       | 6/2341  | 11/19559  | 0.0007892 | 0.0215427 | 0.0193142 | 6  | EHD1/ITPR2/ITPR1/ATP2A3/F2R/IRAG1                                                                                                                                                                                                                                                                                                                                                                                                                 |
| Cellular Component | GO:0042641 | actomyosin                           | 20/2341 | 79/19559  | 0.0008072 | 0.0215427 | 0.0193142 | 20 | HDAC4/PRKCZ/MYLK/MYO18A/PRICKLE4/PDLIM2/MYH9/ACTN1/ACTN4/ILK/ABLIM3/PXN/MYO5A/DAAM1/PDLIM4/CDC42BPB/ABLIM1/LPP/SYNPO/SEPTIN9                                                                                                                                                                                                                                                                                                                      |
| Cellular Component | GO:0030016 | myofibril                            | 44/2341 | 227/19559 | 0.0008116 | 0.0215427 | 0.0193142 | 44 | HDAC4/PARVB/ENO1/KCNE1/MYO18B/TTN/CASQ2/SYNE1/CACNA1C/SLC8A1/TNNT3/PRICKLE4/JUP/MYOZ3/BIN1/PDLIM2/MYH15/AHNAK/SYNPO2L/ACTN1/NOS1AP/ACTN4/ILK/SCN1A/TMOD3/SVIL/PDE4DIP/DNAJB6/ACTG1/CAB39/ARHGFE25/MYOM1/ANKRD2/CORO1C/MYOT/FHL2/SLC2A1/PDLIM4/ANK2/ANKRD1/TMOD1/MYL7/CASQ1/SYNPO                                                                                                                                                                  |
| Cellular Component | GO:0005765 | lysosomal membrane                   | 66/2341 | 375/19559 | 0.0008171 | 0.0215427 | 0.0193142 | 66 | AZU1/TRPM2/HLA-DMB/RPTOR/AP2A1/CLCN6/C3AR1/ANKFY1/RAB2A/LPCAT1/TMEM30A/LNPEP/RAP1B/CEACAM6/RAB5C/SLC29A3/ARRB1/PLD1/GPLD1/RHEB/ANXA6/FPR1/TLR9/ATP8A1/CTSD/SLC11A2/BRI3/SLC15A4/ATP11A/AHNAK/HLA-F/ATP6V1B2/CPNE1/AP1B1/SPHK2/LITAF/AP5S1/GIMAP5/VPS18/CDIP1/CLEC16A/SLC7A5/GNA11/SEC13/ITM2C/GRN/PLEKHM1/TPCN2/SORT1/NPC1/FNIP2/PI4K2A/PLD3/OSTM1/CD68/WDR81/HPS6/AP3D1/CLN5/FLOT1/NPRL2/MARCHF8/IRAG2/ATP6V0C/ATP6V1C1/ACP3                     |
| Cellular Component | GO:0098852 | lytic vacuole membrane               | 66/2341 | 375/19559 | 0.0008171 | 0.0215427 | 0.0193142 | 66 | AZU1/TRPM2/HLA-DMB/RPTOR/AP2A1/CLCN6/C3AR1/ANKFY1/RAB2A/LPCAT1/TMEM30A/LNPEP/RAP1B/CEACAM6/RAB5C/SLC29A3/ARRB1/PLD1/GPLD1/RHEB/ANXA6/FPR1/TLR9/ATP8A1/CTSD/SLC11A2/BRI3/SLC15A4/ATP11A/AHNAK/HLA-F/ATP6V1B2/CPNE1/AP1B1/SPHK2/LITAF/AP5S1/GIMAP5/VPS18/CDIP1/CLEC16A/SLC7A5/GNA11/SEC13/ITM2C/GRN/PLEKHM1/TPCN2/SORT1/NPC1/FNIP2/PI4K2A/PLD3/OSTM1/CD68/WDR81/HPS6/AP3D1/CLN5/FLOT1/NPRL2/MARCHF8/IRAG2/ATP6V0C/ATP6V1C1/ACP3                     |
| Cellular Component | GO:0098844 | postsynaptic endocytic zone membrane | 4/2341  | 5/19559   | 0.0009259 | 0.0238677 | 0.0213987 | 4  | DNM2/DNM1/DNM3/MX1                                                                                                                                                                                                                                                                                                                                                                                                                                |
| Cellular Component | GO:0030864 | cortical actin cytoskeleton          | 20/2341 | 80/19559  | 0.0009571 | 0.0241359 | 0.021639  | 20 | MAEA/GSN/MYRIP/SHROOM3/AKAP13/CTTN/COTL1/MYH9/WASL/PRKCB/WDR1/SPTA1/CDH1/SLC2A1/SPTAN1/SHROOM1/FLOT1/MYADM/SPTBN4/DBNL                                                                                                                                                                                                                                                                                                                            |
| Cellular Component | GO:0031984 | organelle subcompartment             | 68/2341 | 392/19559 | 0.001022  | 0.0247861 | 0.022222  | 68 | CSGALNACT1/FUT4/SORL1/GALNT2/FUT7/VTI1A/VPS53/AP4S1/CHSY1/MBTPS1/TGFB1/KIF13A/DNM2/RAB31/MGAT4A/MYO18A/ATP8A1/RTN4/C17orf75/ARAP1/TRAPPC9/ATP11A/ATP8B1/CHST2/APP/CORO7/PITPNM1/AP1B1/XYLT1/COG1/SGMS1/B4GALT7/UXS1/RAB43/ASAP2/COG8/ST6GAL1/VCPIP1/GRN/ST3GAL4/USP6NL/INPP5E/B4GALT3/SORT1/ATP8B4/PI4K2A/CDH1/FUT11/SYT17/RAB30/COG5/TMED2/YIPF1/ATL1/ASPH/ATP7B/RTN2/CASQ1/VPS51/CLTCL1/C2CD2L/LYPLA2/ST3GAL2/PHETA1/TEPSIN/STIMATE/PLPP3/DOP1B |
| Cellular Component | GO:0045335 | phagocytic vesicle                   | 30/2341 | 140/19559 | 0.0010256 | 0.0247861 | 0.022222  | 30 | ELANE/MPO/CALR/GSN/SLC11A1/NCF4/RAB11FIP1/DNM2/RAB31/TLR9/HLA-C/SNX3/VPS26B/HLA-F/FMNL1/NCF2/UVRAG/ITGB5/SCIMP/RAB43/PGLYRP1/ATG14/ACTG1/ABCA1/MPEG1/NOD2/ATP6V0B/LTF/MYO1C/ATP6V0C                                                                                                                                                                                                                                                               |

|                    |            |                                   |         |           |           |           |           |    |                                                                                                                                                                                                                                                                                        |
|--------------------|------------|-----------------------------------|---------|-----------|-----------|-----------|-----------|----|----------------------------------------------------------------------------------------------------------------------------------------------------------------------------------------------------------------------------------------------------------------------------------------|
| Cellular Component | GO:0005912 | adherens junction                 | 34/2341 | 166/19559 | 0.0011441 | 0.0270839 | 0.0242821 | 34 | TBCD/TJP2/SHROOM3/CRB1/NDRG1/FRMD4A/PRICKLE4/JUP/BAIAP2L1/PKP1/CDC42EP1/PDLIM2/MYH9/BAIAP2/DLL1/LIMD1/SMAD7/FRMD4B/CDH3/TMOD3/PLEKHA7/CDH1/ADD1/MPP7/NOTCH1/PDLIM4/SHROOM1/CDH11/KIFC3/FLOT1/SPTBN4/NECTIN1/NECTIN4/PLPP3                                                              |
| Cellular Component | GO:0043292 | contractile fiber                 | 45/2341 | 238/19559 | 0.0012166 | 0.0282247 | 0.0253049 | 45 | HDAC4/PARVB/ENO1/KCNE1/MYO18B/TTN/CASQ2/MYH11/SYNE1/CACNA1C/SLC8A1/TNNT3/PRICKLE4/JUP/MYOZ3/BIN1/PDLIM2/MYH15/AHNAK/SYNPO2L/ACTN1/NOS1AP/ACTN4/ILK/SCN1A/TMOD3/SVIL/PDE4DIP/DNAJB6/ACTG1/CAB39/ARHGFE25/MYOM1/ANKRD2/CORO1C/MYOT/FHL2/SLC2A1/PDLIM4/ANK2/ANKRD1/TMOD1/MYL7/CASQ1/SYNPO |
| Cellular Component | GO:0048188 | Set1C/COMPASS complex             | 6/2341  | 12/19559  | 0.0014189 | 0.0321351 | 0.0288108 | 6  | ASH2L/WDR82/SETD1B/SETD1A/DYDC2/DYDC1                                                                                                                                                                                                                                                  |
| Cellular Component | GO:0031941 | filamentous actin                 | 11/2341 | 34/19559  | 0.0014546 | 0.0321351 | 0.0288108 | 11 | MYO18B/DUSP22/PRICKLE4/PDLIM2/JAM3/ESPN/ACTG1/NCKAP1/MYO1C/PDLIM4/SMTN                                                                                                                                                                                                                 |
| Cellular Component | GO:0001772 | immunological synapse             | 12/2341 | 39/19559  | 0.0014682 | 0.0321351 | 0.0288108 | 12 | LAT/RHOH/LCK/SNX27/MYH9/SCIMP/PTPRJ/BCL10/DUSP3/CD37/EZR/VAV3                                                                                                                                                                                                                          |
| Cellular Component | GO:0043197 | dendritic spine                   | 35/2341 | 175/19559 | 0.0015095 | 0.0324266 | 0.0290721 | 35 | ABR/SORCS2/PPP1R1B/ZMYND8/SLC8A1/ARRB1/CTTN/DNM2/ITSN1/SLA/COMT/BAIAP2/APP/AKAP5/ASAP1/APBA2/FARP1/CNIH2/STRN4/BCR/SIPA1L1/ARRB2/DNM1/DOCK10/DNM3/RPH3A/SHANK2/RGS10/NEDD4/PDLIM4/MX1/CYFIP1/MYL7/DTNBP1/SYNPO                                                                         |
| Cellular Component | GO:0002193 | MAML1-RBP-Jkappa-ICN1 complex     | 3/2341  | 3/19559   | 0.0017127 | 0.0361218 | 0.0323851 | 3  | MAML1/RBPJ/NOTCH1                                                                                                                                                                                                                                                                      |
| Cellular Component | GO:0098685 | Schaffer collateral - CA1 synapse | 20/2341 | 84/19559  | 0.0018191 | 0.0376318 | 0.0337389 | 20 | PRKCZ/ABR/PRKAR1B/ITPR1/BAIAP2/APBA2/NRXN1/SYN2/GHRL/ACTG1/SH3GL1/BCR/PRKCI/GSG1L/GABBR1/PLCG1/CDH11/DTNBP1/SYNPO/LRFN2                                                                                                                                                                |
| Cellular Component | GO:0044309 | neuron spine                      | 35/2341 | 177/19559 | 0.0018492 | 0.0376318 | 0.0337389 | 35 | ABR/SORCS2/PPP1R1B/ZMYND8/SLC8A1/ARRB1/CTTN/DNM2/ITSN1/SLA/COMT/BAIAP2/APP/AKAP5/ASAP1/APBA2/FARP1/CNIH2/STRN4/BCR/SIPA1L1/ARRB2/DNM1/DOCK10/DNM3/RPH3A/SHANK2/RGS10/NEDD4/PDLIM4/MX1/CYFIP1/MYL7/DTNBP1/SYNPO                                                                         |

|                    |            |                                                       |         |           |           |           |           |    |                                                                                                                                                                                                                                                                                                                                                                                                                                                                                    |
|--------------------|------------|-------------------------------------------------------|---------|-----------|-----------|-----------|-----------|----|------------------------------------------------------------------------------------------------------------------------------------------------------------------------------------------------------------------------------------------------------------------------------------------------------------------------------------------------------------------------------------------------------------------------------------------------------------------------------------|
| Cellular Component | GO:0005635 | nuclear envelope                                      | 78/2341 | 473/19559 | 0.0020071 | 0.0399354 | 0.0358042 | 78 | PRKCZ/TRIM27/DCTN1/SORL1/CALR/FZR1/VRK2/NXF1/PCYT1A/MAD1L1/SLC16A3/ITPRIP/TNKS/SYNE1/ERN1/RAE1/SMAD3/RCC1/ITSN1/GNAZ/RTN4/ITPR1/NAV3/BIN1/ACKR2/LRRC59/XPO7/EPC1/PRICKLE2/APP/NOS1AP/OSBP6/LMNB2/CPNE1/CLGN/ENY2/BICD2/LMO7/AQP1/GRK5/MTA1/NUP93/NRXN1/SEC13/MGST2/ATP2A3/PLCB1/TEX2/SORT1/NPC1/MFS D10/SNUPN/BCL2/P2RX1/TOR1B/MYO1C/BCL2L1/RBM15B/MX1/TNRC18/TYRO3/SREBF1/PLRG1/P2RX5/FBXW11/NDEL1/LPIN1/BANF1/RAP1GAP2/ANXA7/PCID2/AGPAT5/TOR3A/TE RB2/TEPSIN/LMNTD1/IRAG2/MYORG |
| Cellular Component | GO:0031095 | platelet dense tubular network membrane               | 5/2341  | 9/19559   | 0.0020312 | 0.0399354 | 0.0358042 | 5  | EHD1/ITPR2/ITPR1/ATP2A3/IRAG1                                                                                                                                                                                                                                                                                                                                                                                                                                                      |
| Cellular Component | GO:0031674 | I band                                                | 29/2341 | 140/19559 | 0.002125  | 0.0410831 | 0.0368331 | 29 | HDAC4/PARVB/KCNE1/MYO18B/TTN/CASQ2/CACNA1C/SLC8A1/PRICKLE4/JUP/MYOZ3/BIN1/PDLIM2/SYNPO2L/ACTN1/NOS1AP/ACTN4/SCN1A/DNAJB6/CAB39/ANKRD2/MYOT/FHL2 /SLC2A1/PDLIM4/ANK2/ANKRD1/CASQ1/SYNPO                                                                                                                                                                                                                                                                                             |
| Cellular Component | GO:0031227 | intrinsic component of endoplasmic reticulum membrane | 33/2341 | 166/19559 | 0.0022413 | 0.0412417 | 0.0369753 | 33 | EMC8/CALR/XXYLT1/DHRS9/ERN1/AMFR/PIGU/RHBDD2/RTN4/HLA-C/EDEM1/HM13/HLA-F/DERL2/ERGIC1/SGMS1/SGMS2/SLC37A1/GRAMD1A/SCD/ESYT1/ANKLE2/RTN2/UBXN8/DPAGT1/EMC1/TEX261/BSCL2/SPCS1/MARCHF6/GRAMD2A/STING1/SARAF                                                                                                                                                                                                                                                                          |
| Cellular Component | GO:0030018 | Z disc                                                | 27/2341 | 128/19559 | 0.0022617 | 0.0412417 | 0.0369753 | 27 | HDAC4/PARVB/KCNE1/MYO18B/TTN/CASQ2/CACNA1C/SLC8A1/PRICKLE4/JUP/MYOZ3/BIN1/PDLIM2/SYNPO2L/ACTN1/NOS1AP/ACTN4/SCN1A/DNAJB6/CAB39/MYOT/FHL2/SLC2A1/PDLIM4/ANK2/CASQ1/SYNPO                                                                                                                                                                                                                                                                                                            |
| Cellular Component | GO:0031092 | platelet alpha granule membrane                       | 7/2341  | 17/19559  | 0.0022754 | 0.0412417 | 0.0369753 | 7  | CD9/APLP2/LY6G6F/ITGA2B/PHACTR2/ITGB3/LHFPL2                                                                                                                                                                                                                                                                                                                                                                                                                                       |
| Cellular Component | GO:0099092 | postsynaptic density, intracellular component         | 7/2341  | 17/19559  | 0.0022754 | 0.0412417 | 0.0369753 | 7  | ABR/DNM2/TNIK/BAIAP2/SH3GL1/BCR/ARHGFE2                                                                                                                                                                                                                                                                                                                                                                                                                                            |
| Cellular Component | GO:0001931 | uropod                                                | 6/2341  | 13/19559  | 0.0023693 | 0.0416425 | 0.0373347 | 6  | PIP5K1B/PSTPIP1/MYH9/SCIMP/EZR/FLOT1                                                                                                                                                                                                                                                                                                                                                                                                                                               |
| Cellular Component | GO:0031254 | cell trailing edge                                    | 6/2341  | 13/19559  | 0.0023693 | 0.0416425 | 0.0373347 | 6  | PIP5K1B/PSTPIP1/MYH9/SCIMP/EZR/FLOT1                                                                                                                                                                                                                                                                                                                                                                                                                                               |

|                    |            |                                 |         |           |           |           |           |    |                                                                                                                                                                                                                                                                                                                                                                                                                                                  |
|--------------------|------------|---------------------------------|---------|-----------|-----------|-----------|-----------|----|--------------------------------------------------------------------------------------------------------------------------------------------------------------------------------------------------------------------------------------------------------------------------------------------------------------------------------------------------------------------------------------------------------------------------------------------------|
| Cellular Component | GO:0005667 | transcription regulator complex | 69/2341 | 413/19559 | 0.0025362 | 0.0439101 | 0.0393677 | 69 | ELANE/HDAC4/ZFPM1/GFI1/RXRA/PPARG/TFDP1/NCOR2/CREB1/RUNX1/SKI/VDR/CORO2A/SMAD3/GATAD2A/E2F3/NFATC2/HIPK2/E2F7/ZFXH3/ZBTB16/NFATC1/RFX3/RBPJ/TCF12/TCF7L2/TAF10/LIMD1/SMAD7/HDAC1/TLE1/MTA1/CTBP1/PHF12/SP3/CREG1/WWTR1/ATF7IP/CTBP2/RARG/RUNX2/BRF1/GFI1B/CREBBP/CCNH/MTA2/ETS1/ARNTL/PRDM16/MED8/HOXA9/RB1/MEIS1/E2F6/TCF3/MED25/SUB1/EPAS1/TAF1D/NAA16/CEBPB/RUNX3/TEAD2/ANKRD1/RELA/SSBP3/NR5A2/LMO4/ERCC2                                    |
| Cellular Component | GO:0030017 | sarcomere                       | 39/2341 | 207/19559 | 0.0026425 | 0.0450774 | 0.0404142 | 39 | HDAC4/PARVB/ENO1/KCNE1/MYO18B/TTN/CASQ2/SYNE1/CACNA1C/SLC8A1/TNNT3/PRICKLE4/JUP/MYOZ3/BIN1/PDLIM2/SYNPO2L/ACTN1/NOS1AP/ACTN4/ILK/SCN1A/TMOD3/DNAJB6/CAB39/ARHGEF25/MYOM1/ANKRD2/CORO1C/MYOT/FHL2/SLC2A1/PDLIM4/ANK2/ANKRD1/TMOD1/MYL7/CASQ1/SYNPO                                                                                                                                                                                                |
| Cellular Component | GO:0035577 | azurophil granule membrane      | 15/2341 | 58/19559  | 0.0027858 | 0.0456166 | 0.0408977 | 15 | AZU1/C3AR1/LPCAT1/TMEM30A/RAP1B/CEACAM6/RAB5C/FPR1/ATP8A1/BRI3/CPNE1/CD68/IRAG2/ATP6VOC/ACP3                                                                                                                                                                                                                                                                                                                                                     |
| Cellular Component | GO:0042470 | melanosome                      | 23/2341 | 105/19559 | 0.0027921 | 0.0456166 | 0.0408977 | 23 | P4HB/BSG/RPN1/MYH11/RAB2A/RAB5C/RAB5B/SLC1A5/ANXA6/CAPG/CTSD/RAB27A/ATP6V1B2/MYO5A/ITGB3/CTSB/YWHAZ/SGSM2/SLC2A1/SND1/TRPV2/FLOT1/DTNBP1                                                                                                                                                                                                                                                                                                         |
| Cellular Component | GO:0048770 | pigment granule                 | 23/2341 | 105/19559 | 0.0027921 | 0.0456166 | 0.0408977 | 23 | P4HB/BSG/RPN1/MYH11/RAB2A/RAB5C/RAB5B/SLC1A5/ANXA6/CAPG/CTSD/RAB27A/ATP6V1B2/MYO5A/ITGB3/CTSB/YWHAZ/SGSM2/SLC2A1/SND1/TRPV2/FLOT1/DTNBP1                                                                                                                                                                                                                                                                                                         |
| Cellular Component | GO:0005874 | microtubule                     | 71/2341 | 431/19559 | 0.0031829 | 0.0507822 | 0.0455288 | 71 | TBCD/DCTN1/SNTB2/KIF13B/KCNAB2/DNAH3/CSNK1D/NDE1/SHROOM3/NDRG1/RASSF3/MAP7/SLC8A1/KIF13A/DNM2/MEFV/DYNC1H1/SPAG6/WHAMM/STAU2/RUSC1/NAV3/CUL3/DISC1/BAIAP2/TUBB4B/EML4/CDC16/CCDC66/CRHBP/DCTN2/KIF21B/SVIL/MTA1/MYO5A/CSP1/WDR47/PARP4/KIF5C/HOOK2/TLL4/BCL10/NUMA1/TRIM55/TLL11/TUBA4B/TUBA4A/TUBA8/DNM1/NEK6/KLHL2/KIF1B/DNM3/MAP1A/DNM1L/TPPP3/ARHGEF2/KIFAP3/DYSF/SHROOM1/CYLD/SPAG5/DNAI2/FBXW1/TUBGCP2/NDEL1/KIFC3/CCT6A/TLL1/NAV1/SEPTIN9 |
| Cellular Component | GO:0017053 | transcription repressor complex | 18/2341 | 76/19559  | 0.0031958 | 0.0507822 | 0.0455288 | 18 | ELANE/HDAC4/ZFPM1/GFI1/NCOR2/SKI/CORO2A/GATAD2A/ZBTB16/RBPJ/HDAC1/MTA1/CTBP1/PHF12/SP3/CTBP2/MTA2/PRDM16                                                                                                                                                                                                                                                                                                                                         |
| Cellular Component | GO:0098791 | Golgi apparatus subcompartment  | 62/2341 | 368/19559 | 0.003339  | 0.0523418 | 0.0469271 | 62 | CSGALNACT1/FUT4/SORL1/GALNT2/FUT7/VTI1A/VPS53/AP4S1/CHSY1/MBTPS1/TGFB1/KIF13A/DNM2/RAB31/MGAT4A/MYO18A/ATP8A1/C17orf75/ARAP1/TRAPPC9/ATP11A/ATP8B1/CHST2/APP/CORO7/PITPNM1/AP1B1/XYL1/COG1/SGMS1/B4GALT7/UXS1/RAB43/ASAP2/COG8/ST6GAL1/VCIPI1/GRN/ST3GAL4/USP6NL/INPP5E/B4GALT3/SORT1/ATP8B4/PI4K2A/CDH1/FUT11/SYT17/RAB30/COG5/TMED2/YIPF1/ATL1/ATP7B/VPS51/CLTCL1/LYPLA2/ST3GAL2/PHETA1/TEPSIN/PLPP3/DOP1B                                     |
| Cellular Component | GO:0005770 | late endosome                   | 49/2341 | 278/19559 | 0.0034642 | 0.0535794 | 0.0480367 | 49 | HLA-<br>DMB/SORL1/VTI1A/VAC14/SLC11A1/PRKAR1B/SLC29A3/PLD1/ANXA6/SFTPD/SLC11A2/ANKRD13B/CTSH/RAB27A/VPS26B/ANKRD13D/DERL2/UVRAG/CRHBP/LITAF/RAPGEF2/VAMP5/AP5S1/GIMAP5/MYO5A/CD79A/VPS18/CDIP1/CLEC16A/HTT/ANKRD13A/GRN/KCNQ1/NPC1/NTRK1/MICALL1/ASTN2/PLD3/F2R/CD68/DYSF/YIPF1/WDR81/ATP7B/PARM1/MVB12A/CLTCL1/MARCHF8/SLA2                                                                                                                     |



|                    |            |                                                      |         |           |           |           |           |    |                                                                                                                                                                                                                                                                                                                                                                                                                   |
|--------------------|------------|------------------------------------------------------|---------|-----------|-----------|-----------|-----------|----|-------------------------------------------------------------------------------------------------------------------------------------------------------------------------------------------------------------------------------------------------------------------------------------------------------------------------------------------------------------------------------------------------------------------|
| Cellular Component | GO:0016328 | lateral plasma membrane                              | 16/2341 | 65/19559  | 0.0035129 | 0.0536172 | 0.0480706 | 16 | TBCD/TACSTD2/ABCC1/SLC16A3/VANGL1/JUP/AXIN1/NUMA1/PPP2R1A/SNTA1/SLC16A1/CDH1/CORO1C/GNA12/MYO1C/MARK2                                                                                                                                                                                                                                                                                                             |
| Cellular Component | GO:0030176 | integral component of endoplasmic reticulum membrane | 31/2341 | 158/19559 | 0.003677  | 0.0552641 | 0.0495471 | 31 | EMC8/CALR/XXYLT1/DHRS9/ERN1/AMFR/PIGU/RHBDD2/RTN4/HLA-C/EDEM1/HM13/HLA-F/DERL2/ERGIC1/SGMS1/SGMS2/SLC37A1/SCD/ESYT1/ANKLE2/RTN2/UBXN8/DPAGT1/EMC1/TEX261/BSCL2/SPCS1/MARCHF6/STING1/SARAF                                                                                                                                                                                                                         |
| Cellular Component | GO:0030134 | COPII-coated ER to Golgi transport vesicle           | 21/2341 | 95/19559  | 0.003716  | 0.0552641 | 0.0495471 | 21 | CTS2/SERPINA1/TGFA/STX5/VTI1A/SEC23B/LMAN2/YIF1A/HLA-C/APP/HLA-F/ERGIC1/CNIH2/CD59/SEC13/SEC24C/CNIH4/TMED2/SREBF1/SEC31A/TEX261                                                                                                                                                                                                                                                                                  |
| Cellular Component | GO:0043198 | dendritic shaft                                      | 11/2341 | 38/19559  | 0.0038976 | 0.0572313 | 0.0513108 | 11 | ZMYND8/SLC8A1/BAIAP2/APP/ILK/PREX1/SYNGAP1/CNIH2/KIRREL3/MAP1A/ARHGEF2                                                                                                                                                                                                                                                                                                                                            |
| Cellular Component | GO:0016605 | PML body                                             | 22/2341 | 102/19559 | 0.0041538 | 0.0602304 | 0.0539996 | 22 | TRIM27/BLM/TRIM8/HIPK3/SKI/UBN1/HMBOX1/SP140/NSMCE2/HIPK2/ZBTB16/TCF7L2/SP3/ARNTL/ANKRD2/MORC3/RB1/SP100/CHEK2/SPTBN4/ISG20/DAPK3                                                                                                                                                                                                                                                                                 |
| Cellular Component | GO:0016607 | nuclear speck                                        | 66/2341 | 401/19559 | 0.0044295 | 0.0634342 | 0.056872  | 66 | HDAC4/RREB1/MAML3/NXF1/IL16/RBM19/ZNF217/MAML1/RMI2/DOCK1/SRPK2/GATAD2A/MAML2/SGK1/E2F7/YLPM1/ZBTB16/PACSIN2/ZC3H18/BRD1/EHMT2/USP36/CDYL/SYNP02L/TCF12/PABPN1/CLK3/DGKQ/GRK5/SFMBT2/PRPF8/SETD1B/SETD1A/FAM193B/FEV/PLCB1/FTO/NEK6/UNC45A/MEF2C/EPAS1/TRIP12/KAZN/PRPF6/PRPF40B/RUFY1/PPP1R16B/NSRP1/RBM15B/SDCBP2/PLRG1/SRRM2/TOE1/LHPP/NOC3L/TUT1/MECOM/CDK13/POLI/DAZAP2/PRKAA1/TFIP11/BRD2/TEPSIN/PRKN/NCBP3 |
| Cellular Component | GO:0101003 | ficolin-1-rich granule membrane                      | 15/2341 | 61/19559  | 0.0046796 | 0.0661987 | 0.0593505 | 15 | TRPM2/UBR4/CD55/SLC11A1/CLEC4C/DOK3/FPR2/FPR1/MGAM/PKP1/PTPRN2/ITGB2/ATP6V0C/VPS35L/ADGRE3                                                                                                                                                                                                                                                                                                                        |
| Cellular Component | GO:0031901 | early endosome membrane                              | 31/2341 | 161/19559 | 0.0049139 | 0.0686764 | 0.0615719 | 31 | EHD1/SORL1/SORCS2/VAC14/RAB5C/RAB5B/LDLRAD4/RAB31/SNX27/HLA-C/RABGEF1/INPP4A/SNX3/HLA-F/OSBPL6/TMEM163/LITAF/SH3GL1/KREMEN2/PI4K2A/NTRK1/PLD3/EPS15/RUFY1/WDR81/HPS6/PDLIM4/INPP5F/ZFYVE9/MARCHF3/MARCHF8                                                                                                                                                                                                         |
| Cellular Component | GO:0016324 | apical plasma membrane                               | 60/2341 | 361/19559 | 0.0051965 | 0.0710824 | 0.0637291 | 60 | PRKCZ/PDE4D/SLC2A5/AP2A1/KCNE1/CD9/ABCC1/SLC16A3/SHROOM3/TMEM30A/FXYD1/CRB1/CEACAM6/PLD1/TLR9/MGAM/ABCC2/SLC11A2/TNIK/TRPM6/RAB27A/SLC44A4/ATP8B1/SLC2A9/DLL1/ATP6V1B2/SLC9A3R2/P2RY6/MLC1/RAPGEF2/SLC19A1/LMO7/AQP1/SLC22A11/MUC20/CDHR2/SLC7A5/IL6R/SLC22A5/CTSB/PRKCI/SLC16A1/ARHGEF18/NOTCH1/SHANK2/EPS15/PDGFRB/SLC2A1/SLC7A8/ANK2/SHROOM1/SLC29A1/SLC12A1/EZR/PDZK1/SLC7A1/C2CD2L/SLC23A1/PRKAA1/CEACAM5    |

|                    |            |                                                      |         |           |           |           |           |    |                                                                                                                                                                                                                                                    |
|--------------------|------------|------------------------------------------------------|---------|-----------|-----------|-----------|-----------|----|----------------------------------------------------------------------------------------------------------------------------------------------------------------------------------------------------------------------------------------------------|
| Cellular Component | GO:0002102 | podosome                                             | 9/2341  | 29/19559  | 0.0052944 | 0.0710824 | 0.0637291 | 9  | GSN/CTTN/SH3PXD2B/ASAP1/SVIL/SH3GL1/WDR1/ARHGEF2/DBNL                                                                                                                                                                                              |
| Cellular Component | GO:0030658 | transport vesicle membrane                           | 38/2341 | 209/19559 | 0.0055145 | 0.0710824 | 0.0637291 | 38 | SPRED2/SORL1/AP2A1/TGFA/SNTB2/STX5/VTI1A/TMEM30A/SV2C/RAB5B/SEC23B/ATP8A1/ITPR1/HLA-C/HLA-F/SYN3/PTPRN2/TMEM163/CNIH2/MCTP2/SYN2/CD59/SEC13/SEC24C/PI4K2A/SYNGR3/AP1G2/RPH3A/DNM1L/TMED2/BCL2L1/SREBF1/RPH3AL/DTNBP1/SYPL2/CLTCL1/SEC31A/CB<br>ARP |
| Cellular Component | GO:0031985 | Golgi cisterna                                       | 24/2341 | 117/19559 | 0.0055611 | 0.0710824 | 0.0637291 | 24 | CSGALNACT1/FUT4/SORL1/GALNT2/FUT7/CHSY1/ARAP1/PITPNM1/XYL1/SGMS1/B4GALT7/UXS1/ASAP2/ST6GAL1/ST3GAL4/INPP5E/B4GALT3/SORT1/FUT11/RAB30/TMED2/YIPF1/<br>ATL1/ST3GAL2                                                                                  |
| Cellular Component | GO:0001725 | stress fiber                                         | 16/2341 | 68/19559  | 0.0056389 | 0.0710824 | 0.0637291 | 16 | PRKCZ/MYLK/PRICKLE4/PDLIM2/MYH9/ACTN1/ACTN4/ILK/ABLIM3/PXN/DAAM1/PDLIM4/ABLIM1/LPP/SYNPO/SEPTIN9                                                                                                                                                   |
| Cellular Component | GO:0044304 | main axon                                            | 16/2341 | 68/19559  | 0.0056389 | 0.0710824 | 0.0637291 | 16 | KIF13B/KCNAB2/TNFRSF1B/KCNQ2/BIN1/APP/MBP/SCN1A/CRHBP/EPB41L3/SLC1A2/DNM1/MAP1A/CNTNAP1/SPTBN4/NAV1                                                                                                                                                |
| Cellular Component | GO:0097517 | contractile actin filament bundle                    | 16/2341 | 68/19559  | 0.0056389 | 0.0710824 | 0.0637291 | 16 | PRKCZ/MYLK/PRICKLE4/PDLIM2/MYH9/ACTN1/ACTN4/ILK/ABLIM3/PXN/DAAM1/PDLIM4/ABLIM1/LPP/SYNPO/SEPTIN9                                                                                                                                                   |
| Cellular Component | GO:0005793 | endoplasmic reticulum-Golgi intermediate compartment | 26/2341 | 130/19559 | 0.0056974 | 0.0710824 | 0.0637291 | 26 | CTSZ/P4HB/CALR/SERPINA1/TGFA/STX5/CSNK1D/SLC35C2/RAB2A/CD55/MGAT4A/MYO18A/LMAN2/WHAMM/YIF1A/ERGIC1/CNIH2/CD59/VMP1/CNIH4/TMED2/ASPSR1/TRAPPC2<br>B/STING1/TRAPPC2/PLPP3                                                                            |
| Cellular Component | GO:0016528 | sarcoplasm                                           | 18/2341 | 80/19559  | 0.0056982 | 0.0710824 | 0.0637291 | 18 | CALR/GSN/CASQ2/ITPR2/ITPR1/THBS1/JSRP1/NOS1AP/HK2/ATP2A3/NOL3/MEF2C/ASPH/CHERP/RTN2/CASQ1/DTNBP1/IRAG1                                                                                                                                             |
| Cellular Component | GO:0044291 | cell-cell contact zone                               | 17/2341 | 74/19559  | 0.0056988 | 0.0710824 | 0.0637291 | 17 | TJP2/YWHAH/FXYD1/SLC8A1/GJA5/JUP/AHNAK/ACTN1/SCN1A/VAMP5/JAM3/SLC2A1/ANK2/BAIAP2L2/FLOT1/SPTBN4/NECTIN1                                                                                                                                            |

|                    |            |                                                      |         |           |           |           |           |    |                                                                                                                                                                                                                                                                                                                                                                          |
|--------------------|------------|------------------------------------------------------|---------|-----------|-----------|-----------|-----------|----|--------------------------------------------------------------------------------------------------------------------------------------------------------------------------------------------------------------------------------------------------------------------------------------------------------------------------------------------------------------------------|
| Cellular Component | GO:0002947 | tumor necrosis factor receptor superfamily complex   | 3/2341  | 4/19559   | 0.0062364 | 0.0761499 | 0.0682724 | 3  | TNFRSF1B/TRAF2/TNFRSF1A                                                                                                                                                                                                                                                                                                                                                  |
| Cellular Component | GO:0097013 | phagocytic vesicle lumen                             | 3/2341  | 4/19559   | 0.0062364 | 0.0761499 | 0.0682724 | 3  | MPO/PGLYRP1/LTF                                                                                                                                                                                                                                                                                                                                                          |
| Cellular Component | GO:0045178 | basal part of cell                                   | 16/2341 | 69/19559  | 0.0065439 | 0.0790723 | 0.0708925 | 16 | TACSTD2/ABCC1/SLC1A5/SLC11A2/OSCP1/C5AR2/AQP1/MUC20/SLC7A5/SLC16A1/SLC1A3/EP515/MYO1C/SLC7A8/SLC7A1/SLC23A1                                                                                                                                                                                                                                                              |
| Cellular Component | GO:0032432 | actin filament bundle                                | 17/2341 | 76/19559  | 0.0075375 | 0.0901389 | 0.0808141 | 17 | PRKCZ/MYLK/PRICKLE4/PDLIM2/MYH9/ACTN1/ACTN4/ILK/ABLIM3/PXN/DAAM1/PDLIM4/ABLIM1/LPP/SYNPO/SEPTIN9/RFLNA                                                                                                                                                                                                                                                                   |
| Cellular Component | GO:0098978 | glutamatergic synapse                                | 59/2341 | 361/19559 | 0.0079203 | 0.0937503 | 0.084052  | 59 | PRKCZ/ABR/NRP2/RNF19A/PPP1R1B/PRKAR1B/NDRG1/DNM2/ITSN1/ATP2B2/PACSIN2/TNIK/BAIAP2/ACTN1/SYN3/NOS1AP/ABLIM3/SYNGAP1/SPARCL1/DLGAP4/DGKQ/CNIH2/CTBP1/HTR3A/MYO5A/PFN1/NRXN1/VPS18/SYN2/SLC1A2/CTBP2/NUMB/ITGB3/GHRL/CHRM2/SH3GL1/BCR/SLC1A6/PPP2R1A/PLCB1/PRKCI/GSG1L/DNM1/YWHAZ/CDH1/DNM3/P2RX1/ARHGEF2/EP515/NEDD4/AP3D1/PLCG1/RELA/CDH11/NPTX1/GRID1/FLOT1/DTNBP1/SYNPO |
| Cellular Component | GO:0032587 | ruffle membrane                                      | 20/2341 | 95/19559  | 0.0080414 | 0.0942225 | 0.0844753 | 20 | KSR1/KANK1/DNM2/FGR/FGD5/SPATA13/PACSIN2/TESC/PTPRJ/SH3YL1/EP58L3/EP58L1/SH2D3C/ITGB3/PDE9A/CORO1C/ARHGEF2/MYO1C/EZR/ARHGAP45                                                                                                                                                                                                                                            |
| Cellular Component | GO:0035097 | histone methyltransferase complex                    | 17/2341 | 77/19559  | 0.0086209 | 0.1000023 | 0.0896572 | 17 | KDM4B/ASH2L/KANSL1/MGA/WDR82/KMT2D/KDM4C/SETD1B/SETD1A/ZNF335/PHF19/E2F6/CHD8/RUVBL1/DYDC2/DYDC1/PAXIP1                                                                                                                                                                                                                                                                  |
| Cellular Component | GO:0099091 | postsynaptic specialization, intracellular component | 7/2341  | 21/19559  | 0.0088457 | 0.1012799 | 0.0908026 | 7  | ABR/DNM2/TNIK/BAIAP2/SH3GL1/BCR/ARHGEF2                                                                                                                                                                                                                                                                                                                                  |
| Cellular Component | GO:0031528 | microvillus membrane                                 | 8/2341  | 26/19559  | 0.0089056 | 0.1012799 | 0.0908026 | 8  | S100P/MUC20/CDHR2/SLC7A5/ITGB3/SLC7A8/EZR/PDZK1                                                                                                                                                                                                                                                                                                                          |

|                    |            |                          |         |           |           |           |           |    |                                                                                                                                                                                                                                                                                                                                                                                |
|--------------------|------------|--------------------------|---------|-----------|-----------|-----------|-----------|----|--------------------------------------------------------------------------------------------------------------------------------------------------------------------------------------------------------------------------------------------------------------------------------------------------------------------------------------------------------------------------------|
| Cellular Component | GO:0044327 | dendritic spine head     | 5/2341  | 12/19559  | 0.0093719 | 0.1055474 | 0.0946287 | 5  | PPP1R1B/DNM2/DNM1/DNM3/MX1                                                                                                                                                                                                                                                                                                                                                     |
| Cellular Component | GO:0016234 | inclusion body           | 17/2341 | 78/19559  | 0.0098253 | 0.1095902 | 0.0982533 | 17 | NXF1/CABIN1/FGR/FBXO7/ATXN1/EDEM1/NEFM/CLU/PABPN1/SFMBT2/HTT/ZDHHC17/PRDM16/EPS15/BAG5/PRKN/SLF1                                                                                                                                                                                                                                                                               |
| Cellular Component | GO:0000151 | ubiquitin ligase complex | 48/2341 | 287/19559 | 0.0102445 | 0.1121503 | 0.1005486 | 48 | MAEA/RNF144A/FZR1/RNF19A/WWP2/KLHL25/AMFR/RHBDD2/TRAF2/PHC2/FBXO7/CUL3/DCAF15/CDC16/DERL2/UBE2J2/LMO7/ZSWIM5/UBE2V1/DYRK2/FBXL19/ASB1/DCAF5/PHC3/FBXL13/KCTD2/FBXL18/RNF144B/KLHL21/FBXL6/KLHL8/PCGF3/NEDD4/ANAPC7/RNF14/RNF11/PLRG1/FBXW11/WDTC1/RNF40/UBE2D2/GID8/FBXO8/DCAF17/MARCHF6/PRKN/FBH1/BABAM2                                                                      |
| Cellular Component | GO:0031253 | cell projection membrane | 56/2341 | 344/19559 | 0.0102482 | 0.1121503 | 0.1005486 | 56 | S100P/KSR1/EHD1/PDE6A/IQCE/KANK1/DNM2/PKD1L1/FGR/FGD5/ABCC2/SPATA13/SLC11A2/PACSIN2/TESC/TRPM6/ATP8B1/AKAP5/GNAT2/DOCK8/ASAP1/SCIMP/PTPRJ/SLC19A1/SH3YL1/EPS8L3/AQP1/EPS8L1/EPB41L3/MUC20/CDHR2/SLC1A2/SH2D3C/SLC7A5/CNGA4/ITGB3/PDE6H/SLC22A5/PALM/PDE9A/MFSD10/NCKAP1/TSPEAR/CORO1C/CDHR1/SHANK2/GNA12/ARHGEF2/EPS15/MYO1C/FSCN3/SLC7A8/EZR/PDZK1/TXNDC15/ARHGAP45           |
| Cellular Component | GO:0035578 | azurophil granule lumen  | 19/2341 | 91/19559  | 0.0105182 | 0.1140289 | 0.1022328 | 19 | AZU1/ELANE/PRTN3/CTSG/VAT1/MPO/TOLLIP/RNASE3/HEXB/GALNS/DYNC1H1/MNDA/PADI2/TUBB4B/CREG1/GRN/ARSB/IMPDH1/ARHGAP45                                                                                                                                                                                                                                                               |
| Cellular Component | GO:0043194 | axon initial segment     | 6/2341  | 17/19559  | 0.0112034 | 0.1203328 | 0.1078845 | 6  | KCNQ2/BIN1/SCN1A/MAP1A/SPTBN4/NAV1                                                                                                                                                                                                                                                                                                                                             |
| Cellular Component | GO:0098984 | neuron to neuron synapse | 59/2341 | 368/19559 | 0.0117054 | 0.1245717 | 0.111685  | 59 | PRKCZ/ABR/RNF19A/SORCS2/KCNAB2/SLC16A3/CACNA1C/PRKAR1B/SLC8A1/ARRB1/DNM2/RHEB/NCK2/TANC1/BCL11A/RTN4/ATP2B2/ITPR1/RUSC1/TNIK/DISC1/BAIAP2/INPP4A/ZDHHC2/SYN3/MIB1/AKAP5/GRIK4/SYNGAP1/CNIH2/IQSEC1/EPB41L3/SYN2/CPEB3/CHRM2/SH3GL1/BCR/PALM/SIPA1L1/MAPK8IP2/GSG1L/ARRB2/DNM1/YWHAZ/ADD1/SAMD14/DNM3/CABP1/SHANK2/ARHGEF2/TSC2/MX1/GRID1/DTNBP1/AKAP7/SYNPO/DBNL/LRFN2/NECTIN1 |
| Cellular Component | GO:0034399 | nuclear periphery        | 25/2341 | 131/19559 | 0.0119915 | 0.1258021 | 0.1127881 | 25 | MAEA/PRKCZ/BLM/GFI1/NCOR2/MYB/ATF7/NARF/ATXN1/UHRF1/LMNB2/RGS12/DGKQ/NUP93/STAG1/TGFB11/NUMA1/GFI1B/MORC3/SCAF8/ATN1/CEBPB/RUVBL1/SPTBN4/PAXIP1                                                                                                                                                                                                                                |
| Cellular Component | GO:0005795 | Golgi stack              | 28/2341 | 151/19559 | 0.012038  | 0.1258021 | 0.1127881 | 28 | CSGALNACT1/FUT4/SORL1/GALNT2/FUT7/CHSY1/MBTPS1/MGAT4A/ARAP1/PITPNM1/XYL1/SGMS1/B4GALT7/UXS1/ASAP2/ST6GAL1/VCPIP1/ST3GAL4/INPP5E/B4GALT3/SORT1/FUT11/RAB30/TMED2/YIPF1/ATL1/LYPLA2/ST3GAL2                                                                                                                                                                                      |

|                    |            |                                                                |         |          |           |           |           |    |                                                                                                                          |
|--------------------|------------|----------------------------------------------------------------|---------|----------|-----------|-----------|-----------|----|--------------------------------------------------------------------------------------------------------------------------|
| Cellular Component | GO:0044666 | MLL3/4 complex                                                 | 5/2341  | 13/19559 | 0.0137485 | 0.1395909 | 0.1251505 | 5  | ASH2L/KMT2D/DYDC2/DYDC1/PAXIP1                                                                                           |
| Cellular Component | GO:0090724 | central region of growth cone                                  | 3/2341  | 5/19559  | 0.0142022 | 0.1395909 | 0.1251505 | 3  | DISC1/CYFIP1/NDEL1                                                                                                       |
| Cellular Component | GO:0097651 | phosphatidylinositol 3-kinase complex, class I                 | 3/2341  | 5/19559  | 0.0142022 | 0.1395909 | 0.1251505 | 3  | PIK3R1/PIK3R6/PIK3R5                                                                                                     |
| Cellular Component | GO:0000308 | cytoplasmic cyclin-dependent protein kinase holoenzyme complex | 2/2341  | 2/19559  | 0.0143201 | 0.1395909 | 0.1251505 | 2  | CDK14/CCNY                                                                                                               |
| Cellular Component | GO:0036409 | histone H3-K14 acetyltransferase complex                       | 2/2341  | 2/19559  | 0.0143201 | 0.1395909 | 0.1251505 | 2  | BRD1/KAT7                                                                                                                |
| Cellular Component | GO:0045092 | interleukin-18 receptor complex                                | 2/2341  | 2/19559  | 0.0143201 | 0.1395909 | 0.1251505 | 2  | IL18RAP/IL18R1                                                                                                           |
| Cellular Component | GO:0097632 | extrinsic component of phagophore assembly site membrane       | 2/2341  | 2/19559  | 0.0143201 | 0.1395909 | 0.1251505 | 2  | ULK1/ATG14                                                                                                               |
| Cellular Component | GO:0098560 | cytoplasmic side of late endosome membrane                     | 2/2341  | 2/19559  | 0.0143201 | 0.1395909 | 0.1251505 | 2  | LITAF/CDIP1                                                                                                              |
| Cellular Component | GO:0030117 | membrane coat                                                  | 19/2341 | 94/19559 | 0.0147643 | 0.1415416 | 0.1268994 | 19 | AP2A1/AP4S1/SEC23B/EPS15L1/AP1B1/EPN2/AP5S1/VPS18/SEC13/DNM1/SEC24C/AP1G2/EPS15/AP3D1/EPN3/BAIAP2L2/CLTCL1/SEC31A/TEPSIN |

|                    |            |                                                   |         |           |           |           |           |    |                                                                                                                                                                                                                                                                                                   |
|--------------------|------------|---------------------------------------------------|---------|-----------|-----------|-----------|-----------|----|---------------------------------------------------------------------------------------------------------------------------------------------------------------------------------------------------------------------------------------------------------------------------------------------------|
| Cellular Component | GO:0048475 | coated membrane                                   | 19/2341 | 94/19559  | 0.0147643 | 0.1415416 | 0.1268994 | 19 | AP2A1/AP4S1/SEC23B/EPS15L1/AP1B1/EPN2/AP5S1/VPS18/SEC13/DNM1/SEC24C/AP1G2/EPS15/AP3D1/EPN3/BAIAP2L2/CLTCL1/SEC31A/TEPSIN                                                                                                                                                                          |
| Cellular Component | GO:0008091 | spectrin                                          | 4/2341  | 9/19559   | 0.0156834 | 0.1491211 | 0.1336948 | 4  | PRKCB/SPTA1/SPTAN1/SPTBN4                                                                                                                                                                                                                                                                         |
| Cellular Component | GO:0005834 | heterotrimeric G-protein complex                  | 9/2341  | 34/19559  | 0.0160145 | 0.1498133 | 0.1343154 | 9  | GNAZ/GNAI2/GNAT2/GNG7/GNA11/GNB3/GNG2/GNAO1/GNA12                                                                                                                                                                                                                                                 |
| Cellular Component | GO:1905360 | GTPase complex                                    | 9/2341  | 34/19559  | 0.0160145 | 0.1498133 | 0.1343154 | 9  | GNAZ/GNAI2/GNAT2/GNG7/GNA11/GNB3/GNG2/GNAO1/GNA12                                                                                                                                                                                                                                                 |
| Cellular Component | GO:0016363 | nuclear matrix                                    | 21/2341 | 109/19559 | 0.0181609 | 0.1685329 | 0.1510985 | 21 | MAEA/PRKCZ/BLM/GFI1/NCOR2/MYB/ATXN1/UHRF1/RGS12/DGKQ/STAG1/TGFB11/NUMA1/GFI1B/MORC3/SCAF8/ATN1/CEBPB/RUVBL1/SPTBN4/PAXIP1                                                                                                                                                                         |
| Cellular Component | GO:0044322 | endoplasmic reticulum quality control compartment | 7/2341  | 24/19559  | 0.0191182 | 0.176009  | 0.1578012 | 7  | CALR/AMFR/EDEM1/DERL2/ASGR2/EDEM2/MARCHF6                                                                                                                                                                                                                                                         |
| Cellular Component | GO:0016529 | sarcoplasmic reticulum                            | 15/2341 | 71/19559  | 0.0193841 | 0.1770517 | 0.158736  | 15 | CALR/CASQ2/ITPR2/ITPR1/THBS1/JSRP1/NOS1AP/HK2/ATP2A3/NOL3/ASPH/CHERP/RTN2/CASQ1/IRAG1                                                                                                                                                                                                             |
| Cellular Component | GO:0030135 | coated vesicle                                    | 48/2341 | 298/19559 | 0.0196545 | 0.1778018 | 0.1594085 | 48 | CTSZ/CPNE6/SERPINA1/AP2A1/TGFA/STX5/CD9/VTI1A/DENND1A/AAK1/DNM2/SEC23B/SFTPD/LMAN2/YIF1A/HLA-C/STON1/RAB27A/SNX3/APP/HLA-F/ERGIC1/AP1B1/EPN2/CNIH2/VPS18/CD59/NUMB/SEC13/CHRM2/SH3BP4/SNX18/SORT1/SEC24C/AP1G2/ASTN2/CNIH4/EPS15/TMED2/SREBF1/EPN3/INPP5F/CLTCL1/SEC31A/TEX261/DBNL/PHETA1/TEPSIN |
| Cellular Component | GO:0000159 | protein phosphatase type 2A complex               | 6/2341  | 19/19559  | 0.0199261 | 0.1778018 | 0.1594085 | 6  | PPP2R5C/PPP2R1A/PPP2R5E/PPP2R5D/PPP2R1B/PTPA                                                                                                                                                                                                                                                      |

|                    |            |                                           |         |           |           |           |           |    |                                                                                                                                                                                                                                                                                                                                                                                            |
|--------------------|------------|-------------------------------------------|---------|-----------|-----------|-----------|-----------|----|--------------------------------------------------------------------------------------------------------------------------------------------------------------------------------------------------------------------------------------------------------------------------------------------------------------------------------------------------------------------------------------------|
| Cellular Component | GO:0016514 | SWI/SNF complex                           | 6/2341  | 19/19559  | 0.0199261 | 0.1778018 | 0.1594085 | 6  | SMARCA2/NCR1/ARID1B/SMARCD1/SMARCD2/RB1                                                                                                                                                                                                                                                                                                                                                    |
| Cellular Component | GO:0098858 | actin-based cell projection               | 37/2341 | 220/19559 | 0.0202981 | 0.1797389 | 0.1611452 | 37 | S100P/AP2A1/KIF13B/FGD4/ANGPT1/CRB1/CDH23/TBC1D10A/DYNC1H1/LY6G6D/SPATA13/BAIAP2/ATP8B1/APP/ATP6V1B2/SCIMP/TGFB1/FARP1/MYO5A/MUC20/CDHR2/JAM3/ESPN/SLC7A5/ITGB3/PALM/TSPEAR/TMC1/MYO1C/FSCN3/SLC7A8/CDC14A/CYFIP1/EZR/PDZK1/ADGRA2/ACP3                                                                                                                                                    |
| Cellular Component | GO:0034708 | methyltransferase complex                 | 20/2341 | 105/19559 | 0.0233034 | 0.2042116 | 0.1830863 | 20 | KDM4B/ASH2L/SNRPD3/KANSL1/MGA/WDR82/KMT2D/KDM4C/SETD1B/SETD1A/ZNF335/PHF19/E2F6/CHD8/RBM15B/RUVBL1/DYDC2/DYDC1/RIOK1/PAXIP1                                                                                                                                                                                                                                                                |
| Cellular Component | GO:0031301 | integral component of organelle membrane  | 57/2341 | 367/19559 | 0.0234904 | 0.2042116 | 0.1830863 | 57 | CSGALNACT1/EMC8/CALR/GALNT2/XXYLT1/FAR2/DHRS9/SV2C/ERN1/AMFR/PIGU/RHBDD2/SPG7/ATP8A1/VOPP1/RTN4/YIF1A/HLA-C/EDEM1/HM13/HLA-F/DERL2/ERGIC1/PTPRN2/TMEM163/SGMS1/VAMP5/SFXN1/IMMT/SGMS2/PEX26/SLC37A1/PPOX/NPC1/FIS1/SLC39A13/P2RX1/CASD1/PEX11B/SCD/TPST1/P2RX5/ESYT1/CPT1A/ANKLE2/RTN2/MAN1C1/UBXN8/DPAGT1/EMC1/TEX261/BSCL2/SPCS1/MARCHF6/B4GAT1/STING1/SARAF                             |
| Cellular Component | GO:0098843 | postsynaptic endocytic zone               | 4/2341  | 10/19559  | 0.0236969 | 0.2042116 | 0.1830863 | 4  | DNM2/DNM1/DNM3/MX1                                                                                                                                                                                                                                                                                                                                                                         |
| Cellular Component | GO:0030315 | T-tubule                                  | 12/2341 | 54/19559  | 0.023766  | 0.2042116 | 0.1830863 | 12 | CACNA1C/FXYD1/SLC8A1/BIN1/AHNAK/NOS1AP/SCN1A/DYSF/ANK2/RTN2/EZR/CASQ1                                                                                                                                                                                                                                                                                                                      |
| Cellular Component | GO:0031300 | intrinsic component of organelle membrane | 61/2341 | 398/19559 | 0.0252067 | 0.2096337 | 0.1879475 | 61 | CSGALNACT1/EMC8/CALR/GALNT2/XXYLT1/FAR2/DHRS9/SV2C/ERN1/RAB5B/AMFR/PIGU/RHBDD2/SPG7/ATP8A1/VOPP1/RTN4/YIF1A/HLA-C/EDEM1/HM13/CHST2/HLA-F/DERL2/ERGIC1/PTPRN2/TMEM163/SGMS1/VAMP5/SFXN1/IMMT/SGMS2/PEX26/SLC37A1/PPOX/NPC1/FIS1/SLC39A13/P2RX1/CASD1/PEX11B/GRAMD1A/SCD/TPST1/P2RX5/ESYT1/CPT1A/ANKLE2/RTN2/MAN1C1/UBXN8/DPAGT1/EMC1/TEX261/BSCL2/SPCS1/MARCHF6/B4GAT1/GRAMD2A/STING1/SARAF |
| Cellular Component | GO:0005802 | trans-Golgi network                       | 40/2341 | 245/19559 | 0.0254845 | 0.2096337 | 0.1879475 | 40 | FUT4/SORL1/FUT7/VTI1A/VPS53/AP4S1/TGFB1/KIF13A/DNM2/RAB31/MYO18A/ATP8A1/C17orf75/ARAP1/TRAPPC9/ATP11A/ATP8B1/CHST2/APP/CORO7/AP1B1/COG1/RAB43/COG8/GRN/USP6NL/ATP8B4/PI4K2A/CDH1/SYT17/RAB30/COG5/YIPF1/ATP7B/VPS51/CLTCL1/PHETA1/TEPSIN/PLPP3/DOP1B                                                                                                                                       |
| Cellular Component | GO:0005903 | brush border                              | 20/2341 | 106/19559 | 0.0255968 | 0.2096337 | 0.1879475 | 20 | ABCC2/SLC11A2/TRPM6/MYH9/ATP8B1/ACTN1/ACTN4/SLC19A1/AQP1/CDHR2/ESPN/SLC22A5/MFSD10/DNM1L/SHANK2/GNA12/FLII/MYO1C/EZR/PDZK1                                                                                                                                                                                                                                                                 |

|                    |            |                                        |         |          |           |           |           |    |                                                                                                                             |
|--------------------|------------|----------------------------------------|---------|----------|-----------|-----------|-----------|----|-----------------------------------------------------------------------------------------------------------------------------|
| Cellular Component | GO:0032541 | cortical endoplasmic reticulum         | 3/2341  | 6/19559  | 0.0258911 | 0.2096337 | 0.1879475 | 3  | ASPH/C2CD2L/STIMATE                                                                                                         |
| Cellular Component | GO:0097427 | microtubule bundle                     | 3/2341  | 6/19559  | 0.0258911 | 0.2096337 | 0.1879475 | 3  | NUMA1/TPPP3/MARK2                                                                                                           |
| Cellular Component | GO:0005902 | microvillus                            | 18/2341 | 93/19559 | 0.0261506 | 0.2096337 | 0.1879475 | 18 | S100P/KIF13B/ANGPT1/CRB1/TBC1D10A/ATP6V1B2/TGFB1/MUC20/CDHR2/JAM3/ESPN/SLC7A5/ITGB3/MYO1C/FSCN3/SLC7A8/EZR/PDZK1            |
| Cellular Component | GO:0032580 | Golgi cisterna membrane                | 18/2341 | 93/19559 | 0.0261506 | 0.2096337 | 0.1879475 | 18 | CSGALNACT1/FUT4/GALNT2/FUT7/CHSY1/ARAP1/PITPNM1/B4GALT7/UXS1/ASAP2/ST6GAL1/ST3GAL4/INPP5E/B4GALT3/SORT1/FUT11/TMED2/ST3GAL2 |
| Cellular Component | GO:0030008 | TRAPP complex                          | 5/2341  | 15/19559 | 0.026176  | 0.2096337 | 0.1879475 | 5  | TRAPPC10/TRAPPC9/TRAPPC3L/TRAPPC2B/TRAPPC2                                                                                  |
| Cellular Component | GO:0038201 | TOR complex                            | 5/2341  | 15/19559 | 0.026176  | 0.2096337 | 0.1879475 | 5  | RPTOR/PRR5L/LARP1/PRR5/TTI1                                                                                                 |
| Cellular Component | GO:0090543 | Flemming body                          | 8/2341  | 31/19559 | 0.0262042 | 0.2096337 | 0.1879475 | 8  | IL16/CAPG/MICAL3/CHAMP1/USP3/CCDC66/ZFYVE19/RALA                                                                            |
| Cellular Component | GO:0098827 | endoplasmic reticulum subcompartment   | 7/2341  | 26/19559 | 0.0293969 | 0.2335641 | 0.2094023 | 7  | RTN4/ATL1/ASPH/RTN2/CASQ1/C2CD2L/STIMATE                                                                                    |
| Cellular Component | GO:0012507 | ER to Golgi transport vesicle membrane | 13/2341 | 62/19559 | 0.0299328 | 0.2362043 | 0.2117694 | 13 | TGFA/STX5/VTI1A/SEC23B/HLA-C/HLA-F/CNIH2/CD59/SEC13/SEC24C/TMED2/SREBF1/SEC31A                                              |



|                    |            |                                             |         |           |           |           |           |    |                                                                                                                                                                                                                                                                                                                                                                                                                                              |
|--------------------|------------|---------------------------------------------|---------|-----------|-----------|-----------|-----------|----|----------------------------------------------------------------------------------------------------------------------------------------------------------------------------------------------------------------------------------------------------------------------------------------------------------------------------------------------------------------------------------------------------------------------------------------------|
| Cellular Component | GO:0032279 | asymmetric synapse                          | 53/2341 | 343/19559 | 0.0305536 | 0.2394742 | 0.214701  | 53 | PRKCZ/ABR/SORCS2/KCNAB2/SLC16A3/CACNA1C/SLC8A1/ARRB1/DNM2/RHEB/NCK2/TANC1/BCL11A/RTN4/ATP2B2/ITPR1/RUSC1/TNIK/DISC1/BAIAP2/INPP4A/ZDHHC2/SYN3/MIB1/AKAP5/SYNGAP1/CNIH2/IQSEC1/EPB41L3/SYN2/CPEB3/CHRM2/SH3GL1/BCR/PALM/SIPA1L1/MAPK8IP2/GSG1L/ARRB2/DNM1/ADD1/SAMD14/DNM3/CABP1/SHANK2/ARHGFE2/TSC2/MX1/GRID1/DTNBP1/SYNPO/DBNL/LRFN2                                                                                                        |
| Cellular Component | GO:0045177 | apical part of cell                         | 65/2341 | 433/19559 | 0.0317448 | 0.2471407 | 0.2215745 | 65 | PRKCZ/PDE4D/SLC2A5/AP2A1/KCNE1/CD9/ABCC1/SLC16A3/SHROOM3/TMEM30A/FXYD1/CRB1/CEACAM6/PLD1/TLR9/MGAM/ABCC2/SLC11A2/TNIK/TRPM6/RAB27A/SLC44A4/ATP8B1/SLC2A9/DLL1/C5AR2/APP/ATP6V1B2/SLC9A3R2/P2RY6/MLC1/RAPGEF2/SLC19A1/LMO7/AQP1/SLC22A11/MUC20/CDHR2/SLC7A5/NUMB/IL6R/SLC22A5/CTSB/PRKCI/VASH1/SLC16A1/ARHGFE18/NOTCH1/SHANK2/EPS15/PDGFRB/SLC2A1/SLC7A8/ANK2/SHROOM1/SLC29A1/SLC12A1/EZR/PDZK1/SLC7A1/C2CD2L/SLC23A1/PRKAA1/CEACAM5/ATP6V1C1 |
| Cellular Component | GO:0030904 | retromer complex                            | 6/2341  | 21/19559  | 0.0323751 | 0.2503675 | 0.2244674 | 6  | TRIM27/DCTN1/ANKFY1/SNX27/SNX3/VPS26B                                                                                                                                                                                                                                                                                                                                                                                                        |
| Cellular Component | GO:0014069 | postsynaptic density                        | 52/2341 | 337/19559 | 0.0326338 | 0.2506967 | 0.2247626 | 52 | PRKCZ/ABR/SORCS2/KCNAB2/SLC16A3/CACNA1C/SLC8A1/ARRB1/DNM2/RHEB/NCK2/TANC1/BCL11A/RTN4/ATP2B2/ITPR1/RUSC1/TNIK/DISC1/BAIAP2/INPP4A/ZDHHC2/SYN3/MIB1/AKAP5/SYNGAP1/CNIH2/IQSEC1/EPB41L3/SYN2/CPEB3/SH3GL1/BCR/PALM/SIPA1L1/MAPK8IP2/GSG1L/ARRB2/DNM1/ADD1/SAMD14/DNM3/CABP1/SHANK2/ARHGFE2/TSC2/MX1/GRID1/DTNBP1/SYNPO/DBNL/LRFN2                                                                                                              |
| Cellular Component | GO:0043296 | apical junction complex                     | 25/2341 | 143/19559 | 0.0329182 | 0.2512182 | 0.2252301 | 25 | PRKCZ/TBCD/TJP2/SHROOM3/UBN1/FRMD4A/JUP/PMP22/FRMD4B/RAPGEF2/PLEKHA7/JAM3/ACTG1/PRKCI/CDH1/MPP7/ARHGAP17/ARHGFE2/SHROOM1/FRMD6/KIFC3/SYNPO/NPHP4/JAML/NECTIN1                                                                                                                                                                                                                                                                                |
| Cellular Component | GO:0099023 | vesicle tethering complex                   | 14/2341 | 70/19559  | 0.0360251 | 0.2731314 | 0.2448765 | 14 | VPS53/TGFBRAP1/TRAPPC10/TRAPPC9/COG1/VPS18/TRAPPC3L/COG8/HOOK2/NBAS/COG5/VPS51/TRAPPC2B/TRAPPC2                                                                                                                                                                                                                                                                                                                                              |
| Cellular Component | GO:0014704 | intercalated disc                           | 11/2341 | 51/19559  | 0.0362885 | 0.2733423 | 0.2450655 | 11 | YWHAH/FXYD1/SLC8A1/GJA5/JUP/ACTN1/SCN1A/VAMP5/SLC2A1/ANK2/SPTBN4                                                                                                                                                                                                                                                                                                                                                                             |
| Cellular Component | GO:0005776 | autophagosome                               | 18/2341 | 97/19559  | 0.0381842 | 0.2801785 | 0.2511945 | 18 | VTI1A/ULK1/MEFV/PIP4K2A/UVRAG/TMEM150B/RUFY4/VPS18/HTT/ATG14/TBC1D14/DAPK2/VMP1/WDR81/GRAMD1A/NCOA4/STING1/RUBCNL                                                                                                                                                                                                                                                                                                                            |
| Cellular Component | GO:0000110 | nucleotide-excision repair factor 1 complex | 2/2341  | 3/19559   | 0.039535  | 0.2801785 | 0.2511945 | 2  | ERCC1/XPA                                                                                                                                                                                                                                                                                                                                                                                                                                    |

|                    |            |                                                     |         |          |           |           |           |    |                                                                                 |
|--------------------|------------|-----------------------------------------------------|---------|----------|-----------|-----------|-----------|----|---------------------------------------------------------------------------------|
| Cellular Component | GO:0016513 | core-binding factor complex                         | 2/2341  | 3/19559  | 0.039535  | 0.2801785 | 0.2511945 | 2  | RUNX1/RUNX3                                                                     |
| Cellular Component | GO:0030934 | anchoring collagen complex                          | 2/2341  | 3/19559  | 0.039535  | 0.2801785 | 0.2511945 | 2  | COL12A1/COL14A1                                                                 |
| Cellular Component | GO:0031905 | early endosome lumen                                | 2/2341  | 3/19559  | 0.039535  | 0.2801785 | 0.2511945 | 2  | LNPEP/PDLIM4                                                                    |
| Cellular Component | GO:0035866 | alpha-vbeta3 integrin-<br>PKCalpha complex          | 2/2341  | 3/19559  | 0.039535  | 0.2801785 | 0.2511945 | 2  | PRKCA/ITGB3                                                                     |
| Cellular Component | GO:0038039 | G protein-coupled receptor<br>heterodimeric complex | 2/2341  | 3/19559  | 0.039535  | 0.2801785 | 0.2511945 | 2  | GABBR1/GABBR2                                                                   |
| Cellular Component | GO:0097629 | extrinsic component of<br>omegasome membrane        | 2/2341  | 3/19559  | 0.039535  | 0.2801785 | 0.2511945 | 2  | ULK1/ATG14                                                                      |
| Cellular Component | GO:0099073 | mitochondrion-derived<br>vesicle                    | 2/2341  | 3/19559  | 0.039535  | 0.2801785 | 0.2511945 | 2  | DNM1L/PRKN                                                                      |
| Cellular Component | GO:0031526 | brush border membrane                               | 12/2341 | 58/19559 | 0.0396114 | 0.2801785 | 0.2511945 | 12 | ABCC2/SLC11A2/TRPM6/ATP8B1/SLC19A1/AQP1/CDHR2/SLC22A5/MFSD10/SHANK2/GNA12/PDZK1 |
| Cellular Component | GO:0005849 | mRNA cleavage factor<br>complex                     | 6/2341  | 22/19559 | 0.0401441 | 0.2822255 | 0.2530298 | 6  | FIP1L1/CPSF3/SCAF8/ZC3H3/CPSF4/TUT1                                             |

|                    |            |                                                                    |         |           |           |           |           |    |                                                                                                                                                                    |
|--------------------|------------|--------------------------------------------------------------------|---------|-----------|-----------|-----------|-----------|----|--------------------------------------------------------------------------------------------------------------------------------------------------------------------|
| Cellular Component | GO:0031235 | intrinsic component of the cytoplasmic side of the plasma membrane | 3/2341  | 7/19559   | 0.0413279 | 0.2887974 | 0.2589218 | 3  | RASA3/PALM/SPTA1                                                                                                                                                   |
| Cellular Component | GO:0098686 | hippocampal mossy fiber to CA3 synapse                             | 8/2341  | 34/19559  | 0.0437517 | 0.3039043 | 0.2724659 | 8  | RNF19A/PRKAR1B/GRIK4/SH3GL1/YWHAZ/DTNBP1/AKAP7/NECTIN1                                                                                                             |
| Cellular Component | GO:0031902 | late endosome membrane                                             | 24/2341 | 140/19559 | 0.044029  | 0.3040096 | 0.2725603 | 24 | HLA-<br>DMB/SORL1/VTI1A/VAC14/SLC11A1/SLC29A3/PLD1/ANXA6/SLC11A2/RAB27A/LITAF/AP5S1/GIMAP5/VPS18/CDIP1/NPC1/NTRK1/MICALL1/PLD3/CD68/YIPF1/WDR81/MVB12A/MAR<br>CHF8 |
| Cellular Component | GO:0032153 | cell division site                                                 | 14/2341 | 72/19559  | 0.0445183 | 0.3055693 | 0.2739587 | 14 | MAEA/SSH1/NDE1/PSTPIP1/MYLK/MYH9/PITPNM1/SVIL/HTR3A/ZFYVE19/RALA/TUBGCP2/PLCD3/SEPTIN9                                                                             |
| Cellular Component | GO:0033270 | paranode region of axon                                            | 4/2341  | 12/19559  | 0.0459784 | 0.3119003 | 0.2796347 | 4  | KIF13B/EPB41L3/CNTNAP1/SPTBN4                                                                                                                                      |
| Cellular Component | GO:0042405 | nuclear inclusion body                                             | 4/2341  | 12/19559  | 0.0459784 | 0.3119003 | 0.2796347 | 4  | NXF1/ATXN1/PABPN1/SLF1                                                                                                                                             |
| Cellular Component | GO:0031228 | intrinsic component of Golgi membrane                              | 13/2341 | 66/19559  | 0.0471529 | 0.3180079 | 0.2851106 | 13 | CSGALNACT1/GALNT2/YIF1A/CHST2/ERGIC1/SGMS1/SGMS2/SLC39A13/CASD1/TPST1/MAN1C1/TEX261/B4GAT1                                                                         |
| Cellular Component | GO:0030119 | AP-type membrane coat adaptor complex                              | 9/2341  | 41/19559  | 0.0500621 | 0.3356766 | 0.3009514 | 9  | AP2A1/AP4S1/AP1B1/AP5S1/VPS18/AP1G2/EPS15/AP3D1/TEPSIN                                                                                                             |
| Cellular Component | GO:0042383 | sarcolemma                                                         | 23/2341 | 135/19559 | 0.0508101 | 0.3372102 | 0.3023264 | 23 | BSG/SLC2A5/CACNA1C/FXYD1/SLC8A1/BIN1/AHNAK/NOS1AP/SCN1A/AQP1/SNTA1/PDE9A/SNTB1/CORO1C/MYOT/SLC2A1/DYSF/ANK2/RTN2/EZR/FLOT1/CASQ1/DTNBP1                            |

|                    |            |                                                              |         |           |           |           |           |    |                                                                                                                                                                                                                                                                                                                                                                                  |
|--------------------|------------|--------------------------------------------------------------|---------|-----------|-----------|-----------|-----------|----|----------------------------------------------------------------------------------------------------------------------------------------------------------------------------------------------------------------------------------------------------------------------------------------------------------------------------------------------------------------------------------|
| Cellular Component | GO:0005942 | phosphatidylinositol 3-kinase complex                        | 7/2341  | 29/19559  | 0.0508722 | 0.3372102 | 0.3023264 | 7  | PIK3CD/VAC14/PIK3R1/PIK3R6/PIK3R5/ATG14/SLA2                                                                                                                                                                                                                                                                                                                                     |
| Cellular Component | GO:0005581 | collagen trimer                                              | 16/2341 | 87/19559  | 0.0521749 | 0.3437913 | 0.3082267 | 16 | COL23A1/COL17A1/EMILIN2/C1QTNF3/COL4A2/COLQ/SFTPD/COLEC12/COL12A1/MARCO/FCN1/COL14A1/COL5A1/COL28A1/C1QB/GLDN                                                                                                                                                                                                                                                                    |
| Cellular Component | GO:0032154 | cleavage furrow                                              | 11/2341 | 54/19559  | 0.0524578 | 0.3437913 | 0.3082267 | 11 | SSH1/NDE1/PSTPIP1/MYLK/MYH9/PITPNM1/SVIL/HTR3A/ZFYVE19/RALA/PLCD3                                                                                                                                                                                                                                                                                                                |
| Cellular Component | GO:0070603 | SWI/SNF superfamily-type complex                             | 14/2341 | 74/19559  | 0.0543256 | 0.3540319 | 0.3174079 | 14 | CECR2/SRCAP/GATAD2A/SMARCA2/HDAC1/NCR1/MTA1/ARID1B/RSF1/MTA2/SMARCD1/SMARCD2/RB1/RUVBL1                                                                                                                                                                                                                                                                                          |
| Cellular Component | GO:0005847 | mRNA cleavage and polyadenylation specificity factor complex | 5/2341  | 18/19559  | 0.0552203 | 0.3578523 | 0.3208331 | 5  | FIP1L1/CPSF3/ZC3H3/CPSF4/TUT1                                                                                                                                                                                                                                                                                                                                                    |
| Cellular Component | GO:0030173 | integral component of Golgi membrane                         | 12/2341 | 61/19559  | 0.05554   | 0.3579247 | 0.320898  | 12 | CSGALNACT1/GALNT2/YIF1A/ERGIC1/SGMS1/SGMS2/SLC39A13/CASD1/TPST1/MAN1C1/TEX261/B4GAT1                                                                                                                                                                                                                                                                                             |
| Cellular Component | GO:0030133 | transport vesicle                                            | 60/2341 | 410/19559 | 0.0573646 | 0.3676407 | 0.3296089 | 60 | SPRED2/SORL1/AP2A1/TGFA/SNTB2/STX5/VT1A/MYRIP/CRISPLD2/CD55/TMEM30A/SV2C/RAB5B/SEC23B/ATP8A1/ITPR1/HLA-C/STON1/BIN1/DISC1/RAB27A/DDC/APP/HLA-F/SYN3/PTPRN2/TMEM163/APBA2/RAB40C/CNIH2/IQSEC1/MCTP2/COP5/SYN2/KIRREL3/CD59/SEC13/SORT1/DNM1/SEC24C/PI4K2A/SYNGR3/AP1G2/KIF1B/RPH3A/DNM1L/SYT17/TMED2/BCL2L1/YIPF1/SREBF1/RPH3AL/NDEL1/NPTX1/DTNBP1/SYPL2/CLTCL1/NTF4/SEC31A/CBARP |
| Cellular Component | GO:0034451 | centriolar satellite                                         | 17/2341 | 95/19559  | 0.0577912 | 0.3683395 | 0.3302354 | 17 | ITGB1BP1/PIK3R5/CCDC66/LATS2/PAX2/TACC3/SDCCAG8/FNIP2/NEK6/FLII/AK5/TAF1D/DYSF/SPAG5/KCTD1/CEP72/FLOT1                                                                                                                                                                                                                                                                           |
| Cellular Component | GO:0005915 | zonula adherens                                              | 3/2341  | 8/19559   | 0.0603552 | 0.3764086 | 0.3374698 | 3  | JUP/PLEKHA7/KIFC3                                                                                                                                                                                                                                                                                                                                                                |

|                    |            |                             |         |           |           |           |           |    |                                                                                                                                                                                                                                                                                                                                            |
|--------------------|------------|-----------------------------|---------|-----------|-----------|-----------|-----------|----|--------------------------------------------------------------------------------------------------------------------------------------------------------------------------------------------------------------------------------------------------------------------------------------------------------------------------------------------|
| Cellular Component | GO:0016600 | flotillin complex           | 3/2341  | 8/19559   | 0.0603552 | 0.3764086 | 0.3374698 | 3  | CDH1/CORO1C/FLOT1                                                                                                                                                                                                                                                                                                                          |
| Cellular Component | GO:0031931 | TORC1 complex               | 3/2341  | 8/19559   | 0.0603552 | 0.3764086 | 0.3374698 | 3  | RPTOR/LARP1/TTI1                                                                                                                                                                                                                                                                                                                           |
| Cellular Component | GO:0043203 | axon hillock                | 3/2341  | 8/19559   | 0.0603552 | 0.3764086 | 0.3374698 | 3  | PRKCZ/NDEL1/SPTBN4                                                                                                                                                                                                                                                                                                                         |
| Cellular Component | GO:0005798 | Golgi-associated vesicle    | 29/2341 | 181/19559 | 0.0621169 | 0.3853244 | 0.3454632 | 29 | CTSZ/SERPINA1/AP2A1/TGFA/STX5/VTI1A/CHIC2/SEC23B/LMAN2/YIF1A/HLA-C/APP/HLA-F/ERGIC1/CNIH2/CD59/CNGA4/SEC13/ZDHHC17/SORT1/SEC24C/AP1G2/PI4KA/CNIH4/TMED2/SREBF1/CLTCL1/SEC31A/TEX261                                                                                                                                                        |
| Cellular Component | GO:0099572 | postsynaptic specialization | 53/2341 | 361/19559 | 0.0671177 | 0.4009975 | 0.359515  | 53 | PRKCZ/ABR/SORCS2/KCNAB2/SLC16A3/CACNA1C/SLC8A1/ARRB1/DNM2/RHEB/NCK2/TANC1/BCL11A/RTN4/ATP2B2/ITPR1/RUSC1/TNIK/DISC1/BAIAP2/INPP4A/ZDHHC2/SYN3/MIB1/AKAP5/SYNGAP1/DLGAP4/CNIH2/IQSEC1/EPB41L3/SYN2/CPEB3/SH3GL1/BCR/PALM/SIPA1L1/MAPK8IP2/GSG1L/ARRB2/DNM1/ADD1/SAMD14/DNM3/CABP1/SHANK2/ARHGEF2/TS<br>C2/MX1/GRID1/DTNBP1/SYNPO/DBNL/LRFN2 |
| Cellular Component | GO:1902911 | protein kinase complex      | 18/2341 | 104/19559 | 0.0681602 | 0.4009975 | 0.359515  | 18 | PRKAG2/ULK1/ERN1/ERC1/CDK14/PRKAB1/UVRAG/IGF1R/CAB39/CCNH/INSRR/CCNA1/RB1/CCNY/ERCC2/CDK13/PRKAA1/CCNP                                                                                                                                                                                                                                     |
| Cellular Component | GO:0016342 | catenin complex             | 7/2341  | 31/19559  | 0.0695553 | 0.4009975 | 0.359515  | 7  | CDH23/JUP/SMAD7/CDH3/CDH4/CDH1/CDH11                                                                                                                                                                                                                                                                                                       |
| Cellular Component | GO:0030057 | desmosome                   | 6/2341  | 25/19559  | 0.0700326 | 0.4009975 | 0.359515  | 6  | JUP/PKP1/PERP/JAM3/KAZN/PPL                                                                                                                                                                                                                                                                                                                |
| Cellular Component | GO:0030427 | site of polarized growth    | 30/2341 | 191/19559 | 0.0723084 | 0.4009975 | 0.359515  | 30 | CTSZ/LMTK2/TIMP2/SSH1/APBB2/AMFR/CTTN/DNM2/DISC1/IGHMBP2/APP/PREX1/FRYL/DCTN2/KIF21B/MYO5A/WDR47/KIF5C/PI4K2A/SHANK2/FSCN3/CYFIP1/TRPV2/NDEL1/DTNB<br>P1/OTX2/NDRG2/DBNL/CBARP/NECTIN1                                                                                                                                                     |

|                    |            |                                                 |        |         |           |           |          |   |               |
|--------------------|------------|-------------------------------------------------|--------|---------|-----------|-----------|----------|---|---------------|
| Cellular Component | GO:0000015 | phosphopyruvate hydratase complex               | 2/2341 | 4/19559 | 0.0728335 | 0.4009975 | 0.359515 | 2 | ENO1/ENO3     |
| Cellular Component | GO:0000306 | extrinsic component of vacuolar membrane        | 2/2341 | 4/19559 | 0.0728335 | 0.4009975 | 0.359515 | 2 | ULK1/VAC14    |
| Cellular Component | GO:0005826 | actomyosin contractile ring                     | 2/2341 | 4/19559 | 0.0728335 | 0.4009975 | 0.359515 | 2 | MAEA/MYH9     |
| Cellular Component | GO:0005899 | insulin receptor complex                        | 2/2341 | 4/19559 | 0.0728335 | 0.4009975 | 0.359515 | 2 | IGF1R/INSRR   |
| Cellular Component | GO:0005944 | phosphatidylinositol 3-kinase complex, class IB | 2/2341 | 4/19559 | 0.0728335 | 0.4009975 | 0.359515 | 2 | PIK3R6/PIK3R5 |
| Cellular Component | GO:0010009 | cytoplasmic side of endosome membrane           | 2/2341 | 4/19559 | 0.0728335 | 0.4009975 | 0.359515 | 2 | LITAF/CDIP1   |
| Cellular Component | GO:0014802 | terminal cisterna                               | 2/2341 | 4/19559 | 0.0728335 | 0.4009975 | 0.359515 | 2 | RTN2/CASQ1    |
| Cellular Component | GO:0019034 | viral replication complex                       | 2/2341 | 4/19559 | 0.0728335 | 0.4009975 | 0.359515 | 2 | PI4KA/SHFL    |
| Cellular Component | GO:0030478 | actin cap                                       | 2/2341 | 4/19559 | 0.0728335 | 0.4009975 | 0.359515 | 2 | GSN/WASL      |

|                    |            |                                            |         |          |           |           |          |    |                                                                  |
|--------------------|------------|--------------------------------------------|---------|----------|-----------|-----------|----------|----|------------------------------------------------------------------|
| Cellular Component | GO:0031379 | RNA-directed RNA polymerase complex        | 2/2341  | 4/19559  | 0.0728335 | 0.4009975 | 0.359515 | 2  | RMRP/ZNFX1                                                       |
| Cellular Component | GO:0035867 | alpha-v-beta3 integrin-IGF-1-IGF1R complex | 2/2341  | 4/19559  | 0.0728335 | 0.4009975 | 0.359515 | 2  | IGF1R/ITGB3                                                      |
| Cellular Component | GO:0070516 | CAK-ERCC2 complex                          | 2/2341  | 4/19559  | 0.0728335 | 0.4009975 | 0.359515 | 2  | CCNH/ERCC2                                                       |
| Cellular Component | GO:0070522 | ERCC4-ERCC1 complex                        | 2/2341  | 4/19559  | 0.0728335 | 0.4009975 | 0.359515 | 2  | ERCC1/SLX4                                                       |
| Cellular Component | GO:0071664 | catenin-TCF7L2 complex                     | 2/2341  | 4/19559  | 0.0728335 | 0.4009975 | 0.359515 | 2  | JUP/TCF7L2                                                       |
| Cellular Component | GO:0098592 | cytoplasmic side of apical plasma membrane | 2/2341  | 4/19559  | 0.0728335 | 0.4009975 | 0.359515 | 2  | EZR/C2CD2L                                                       |
| Cellular Component | GO:1903349 | omegasome membrane                         | 2/2341  | 4/19559  | 0.0728335 | 0.4009975 | 0.359515 | 2  | ULK1/ATG14                                                       |
| Cellular Component | GO:1990604 | IRE1-TRAF2-ASK1 complex                    | 2/2341  | 4/19559  | 0.0728335 | 0.4009975 | 0.359515 | 2  | ERN1/TRAF2                                                       |
| Cellular Component | GO:0016459 | myosin complex                             | 11/2341 | 57/19559 | 0.0728579 | 0.4009975 | 0.359515 | 11 | MYO18B/MYH11/MYO9B/BMF/MYO18A/MYL12A/MYH15/MYH9/MYO5A/MYO1C/MYL7 |

|                    |            |                                           |         |           |           |           |           |    |                                                                                                                       |
|--------------------|------------|-------------------------------------------|---------|-----------|-----------|-----------|-----------|----|-----------------------------------------------------------------------------------------------------------------------|
| Cellular Component | GO:0031091 | platelet alpha granule                    | 16/2341 | 91/19559  | 0.0731695 | 0.4009975 | 0.359515  | 16 | SERPINA1/CD9/APLP2/LY6G6F/THBS1/ACTN1/APP/ITGA2B/ACTN4/CLU/PHACTR2/TGFB1/ITGB3/LHFPL2/PDGFB/CYRIB                     |
| Cellular Component | GO:0030660 | Golgi-associated vesicle membrane         | 19/2341 | 112/19559 | 0.0732858 | 0.4009975 | 0.359515  | 19 | AP2A1/TGFA/STX5/VTI1A/SEC23B/HLA-C/HLA-F/CNIH2/CD59/CNGA4/SEC13/ZDHHC17/SEC24C/AP1G2/PI4KA/TMED2/SREBF1/CLTCL1/SEC31A |
| Cellular Component | GO:0032045 | guanyl-nucleotide exchange factor complex | 4/2341  | 14/19559  | 0.0766981 | 0.4138128 | 0.3710045 | 4  | ELMO1/ULK1/DOCK1/PDE3B                                                                                                |
| Cellular Component | GO:0043218 | compact myelin                            | 4/2341  | 14/19559  | 0.0766981 | 0.4138128 | 0.3710045 | 4  | PMP22/MBP/JAM3/PRKCI                                                                                                  |
| Cellular Component | GO:0099523 | presynaptic cytosol                       | 4/2341  | 14/19559  | 0.0766981 | 0.4138128 | 0.3710045 | 4  | BAIAP2/PRKCB/HTT/CTBP2                                                                                                |
| Cellular Component | GO:0000421 | autophagosome membrane                    | 8/2341  | 38/19559  | 0.0771123 | 0.4141214 | 0.3712813 | 8  | ULK1/UVRAG/TMEM150B/ATG14/VMP1/WDR81/STING1/RUBCNL                                                                    |
| Cellular Component | GO:0005871 | kinesin complex                           | 10/2341 | 51/19559  | 0.0776271 | 0.4149651 | 0.3720376 | 10 | KIF13B/NDE1/KIF13A/DISC1/KIF21B/KIF5C/KIF1B/KIFAP3/NDEL1/KIFC3                                                        |
| Cellular Component | GO:1904949 | ATPase complex                            | 14/2341 | 78/19559  | 0.0781437 | 0.4158106 | 0.3727958 | 14 | CECR2/SRCAP/GATAD2A/SMARCA2/HDAC1/NCR1/MTA1/ARID1B/RSF1/MTA2/SMARCD1/SMARCD2/RB1/RUVBL1                               |
| Cellular Component | GO:0071682 | endocytic vesicle lumen                   | 5/2341  | 20/19559  | 0.0818831 | 0.4245995 | 0.3806754 | 5  | MPO/CALR/HBB/PGLYRP1/LTF                                                                                              |



|                    |            |                                                                |         |           |           |           |           |    |                                                                                                                                                                                                                                 |
|--------------------|------------|----------------------------------------------------------------|---------|-----------|-----------|-----------|-----------|----|---------------------------------------------------------------------------------------------------------------------------------------------------------------------------------------------------------------------------------|
| Cellular Component | GO:0031588 | nucleotide-activated protein kinase complex                    | 3/2341  | 9/19559   | 0.0826911 | 0.4245995 | 0.3806754 | 3  | PRKAG2/PRKAB1/PRKAA1                                                                                                                                                                                                            |
| Cellular Component | GO:0033018 | sarcoplasmic reticulum lumen                                   | 3/2341  | 9/19559   | 0.0826911 | 0.4245995 | 0.3806754 | 3  | CALR/CASQ2/CASQ1                                                                                                                                                                                                                |
| Cellular Component | GO:0043196 | varicosity                                                     | 3/2341  | 9/19559   | 0.0826911 | 0.4245995 | 0.3806754 | 3  | TNFRSF1B/CRHBP/DNM1                                                                                                                                                                                                             |
| Cellular Component | GO:0060187 | cell pole                                                      | 3/2341  | 9/19559   | 0.0826911 | 0.4245995 | 0.3806754 | 3  | PI4K2A/ASTN2/EZR                                                                                                                                                                                                                |
| Cellular Component | GO:0070775 | H3 histone acetyltransferase complex                           | 3/2341  | 9/19559   | 0.0826911 | 0.4245995 | 0.3806754 | 3  | BRD1/KAT7/ING5                                                                                                                                                                                                                  |
| Cellular Component | GO:0098833 | presynaptic endocytic zone                                     | 3/2341  | 9/19559   | 0.0826911 | 0.4245995 | 0.3806754 | 3  | ITSN1/DNM1/DNM1L                                                                                                                                                                                                                |
| Cellular Component | GO:0061695 | transferase complex, transferring phosphorus-containing groups | 38/2341 | 253/19559 | 0.0827237 | 0.4245995 | 0.3806754 | 38 | PRKAG2/PIK3CD/POLE/ULK1/VAC14/ERN1/PIK3R1/PIK3R6/POLR2F/RECQL5/POLA2/ERC1/CRCP/PIK3R5/CDK14/PRKAB1/TAF10/UVRAG/IGF1R/ATG14/CAB39/CCNH/RMRP/INSRR/CCNA1/RB1/PKM/ZNF1/RPRD1B/CCNY/POLD3/ERCC2/POLE4/CDK13/POLR1D/PRKAA1/CCNP/SLA2 |
| Cellular Component | GO:0016235 | aggresome                                                      | 8/2341  | 39/19559  | 0.0873158 | 0.4461955 | 0.4000374 | 8  | CABIN1/FGR/EDEM1/SFMBT2/ZDHC17/PRDM16/EPS15/PRKN                                                                                                                                                                                |
| Cellular Component | GO:0005775 | vacuolar lumen                                                 | 27/2341 | 173/19559 | 0.0897612 | 0.446429  | 0.4002467 | 27 | AZU1/ELANE/PRTN3/CTSG/VAT1/MPO/PLBD2/TOLLIP/RNASE3/HEXB/GALNS/GALC/DYNC1H1/MNDA/PADI2/CTSD/TUBB4B/SDC2/CREG1/GRN/CTSB/ARSB/DAPK2/PLD3/PDGFRB/IMPDH1/ARHGAP45                                                                    |

|                    |            |                                             |         |           |           |          |           |    |                                                                                                                                                                                                                                                                                           |
|--------------------|------------|---------------------------------------------|---------|-----------|-----------|----------|-----------|----|-------------------------------------------------------------------------------------------------------------------------------------------------------------------------------------------------------------------------------------------------------------------------------------------|
| Cellular Component | GO:0005788 | endoplasmic reticulum lumen                 | 45/2341 | 308/19559 | 0.0908565 | 0.446429 | 0.4002467 | 45 | CTSZ/IL27/LTBP1/PNPLA2/P4HB/COL23A1/CALR/SERPINA1/COL17A1/APLP2/CASQ2/LIPC/ARSG/TSPAN14/MBTPS1/COL4A2/MGAT4A/THBS1/APP/PDIA5/COL12A1/CLU/MIA3/SDC2/PTPRN2/SPARCL1/PDGFD/ADAMTS13/GHRL/WNT5B/VCPIP1/EDEM2/PDGFB/COL14A1/ARSB/COL5A1/PDGFC/TOR1B/COL28A1/FAM20C/P4HA2/ANO8/CASQ1/TOR3A/P3H1 |
| Cellular Component | GO:0030118 | clathrin coat                               | 9/2341  | 46/19559  | 0.0922014 | 0.446429 | 0.4002467 | 9  | AP2A1/EPS15L1/AP1B1/EPN2/AP1G2/EPS15/EPN3/BAIAP2L2/CLTCL1                                                                                                                                                                                                                                 |
| Cellular Component | GO:0150034 | distal axon                                 | 45/2341 | 309/19559 | 0.0945182 | 0.446429 | 0.4002467 | 45 | CTSZ/LMTK2/TIMP2/SSH1/KCNAB2/APBB2/AAK1/AMFR/SLC8A1/CTTN/DNM2/MICAL1/TANC1/PNOC/ITSN1/DISC1/GIT1/IGHMBP2/APP/ILK/PREX1/PTPRN2/CRHBP/DCTN2/PRKCB/KIF21B/MYO5A/WDR47/ACTG1/CHRM2/KIF5C/SHANK2/RGS10/FSCN3/AP3D1/CYFIP1/TRPV2/NDEL1/RNF40/DTNBP1/CABP4/OTX2/NDRG2/CBARP/NECTIN1              |
| Cellular Component | GO:0005779 | integral component of peroxisomal membrane  | 4/2341  | 15/19559  | 0.0950697 | 0.446429 | 0.4002467 | 4  | FAR2/PEX26/FIS1/PEX11B                                                                                                                                                                                                                                                                    |
| Cellular Component | GO:0016581 | NuRD complex                                | 4/2341  | 15/19559  | 0.0950697 | 0.446429 | 0.4002467 | 4  | GATAD2A/HDAC1/MTA1/MTA2                                                                                                                                                                                                                                                                   |
| Cellular Component | GO:0030127 | COPII vesicle coat                          | 4/2341  | 15/19559  | 0.0950697 | 0.446429 | 0.4002467 | 4  | SEC23B/SEC13/SEC24C/SEC31A                                                                                                                                                                                                                                                                |
| Cellular Component | GO:0031231 | intrinsic component of peroxisomal membrane | 4/2341  | 15/19559  | 0.0950697 | 0.446429 | 0.4002467 | 4  | FAR2/PEX26/FIS1/PEX11B                                                                                                                                                                                                                                                                    |
| Cellular Component | GO:0033268 | node of Ranvier                             | 4/2341  | 15/19559  | 0.0950697 | 0.446429 | 0.4002467 | 4  | KCNQ2/BIN1/SCN1A/SPTBN4                                                                                                                                                                                                                                                                   |
| Cellular Component | GO:0090545 | CHD-type complex                            | 4/2341  | 15/19559  | 0.0950697 | 0.446429 | 0.4002467 | 4  | GATAD2A/HDAC1/MTA1/MTA2                                                                                                                                                                                                                                                                   |

|                    |            |                                                   |         |           |           |          |           |    |                                                                                                                                                                                            |
|--------------------|------------|---------------------------------------------------|---------|-----------|-----------|----------|-----------|----|--------------------------------------------------------------------------------------------------------------------------------------------------------------------------------------------|
| Cellular Component | GO:0030496 | midbody                                           | 28/2341 | 182/19559 | 0.0977386 | 0.446429 | 0.4002467 | 28 | SSH1/CTDP1/IL16/KIF13A/DNM2/CAPG/MICAL1/C6orf89/MICAL3/CHAMP1/USP3/GNAI2/PITPNM1/CCDC66/UVRAG/SVIL/AGBL5/ZFYVE19/RALA/SLC2A1/MBD5/CYLD/SPAG5/ZNF330/BCL3/DTNBP1/CEP44/SPART                |
| Cellular Component | GO:0033017 | sarcoplasmic reticulum membrane                   | 8/2341  | 40/19559  | 0.0982652 | 0.446429 | 0.4002467 | 8  | CASQ2/ITPR2/JSRP1/NOS1AP/ATP2A3/ASPH/CHERP/CASQ1                                                                                                                                           |
| Cellular Component | GO:0031256 | leading edge membrane                             | 27/2341 | 175/19559 | 0.09977   | 0.446429 | 0.4002467 | 27 | KSR1/KANK1/DNM2/FGR/FGD5/SPATA13/PACSIN2/TESC/AKAP5/DOCK8/SCIMP/PTPRJ/SH3YL1/EP8L3/EP8L1/EPB41L3/SLC1A2/SH2D3C/ITGB3/PALM/PDE9A/NCKAP1/CORO1C/ARHGEF2/MYO1C/EZR/ARHGAP45                   |
| Cellular Component | GO:0008021 | synaptic vesicle                                  | 31/2341 | 205/19559 | 0.1011313 | 0.446429 | 0.4002467 | 31 | VTI1A/SV2C/RAB5B/ATP8A1/STON1/BIN1/DISC1/DDC/APP/SYN3/PTPRN2/TMEM163/APBA2/RAB40C/IQSEC1/MCTP2/COP5/SYN2/KIRREL3/DNM1/PI4K2A/SYNGR3/KIF1B/RPH3A/DNM1L/BCL2L1/NDEL1/DTNBP1/SYPL2/NTF4/CBARP |
| Cellular Component | GO:0043209 | myelin sheath                                     | 9/2341  | 47/19559  | 0.1025476 | 0.446429 | 0.4002467 | 9  | PRKCZ/GSN/PMP22/MBP/JAM3/PRKCI/BCL2/TSPAN2/PRXL2B                                                                                                                                          |
| Cellular Component | GO:0090575 | RNA polymerase II transcription regulator complex | 25/2341 | 161/19559 | 0.103893  | 0.446429 | 0.4002467 | 25 | RXRA/PPARG/TFDP1/CREB1/RUNX1/VDR/SMAD3/E2F3/HIPK2/E2F7/TCF12/TCF7L2/TAF10/SMAD7/TLE1/CCNH/MED8/RB1/E2F6/TCF3/CEBPB/RUNX3/TEAD2/NR5A2/ERCC2                                                 |
| Cellular Component | GO:0000805 | X chromosome                                      | 3/2341  | 10/19559  | 0.1079743 | 0.446429 | 0.4002467 | 3  | SIN3B/PCGF3/MACROH2A2                                                                                                                                                                      |
| Cellular Component | GO:0000835 | ER ubiquitin ligase complex                       | 3/2341  | 10/19559  | 0.1079743 | 0.446429 | 0.4002467 | 3  | RHBDD2/DERL2/MARCHF6                                                                                                                                                                       |
| Cellular Component | GO:0001527 | microfibril                                       | 3/2341  | 10/19559  | 0.1079743 | 0.446429 | 0.4002467 | 3  | LTBP1/MFAP4/ADAMTSL5                                                                                                                                                                       |

|                    |            |                                     |        |          |           |          |           |   |                    |
|--------------------|------------|-------------------------------------|--------|----------|-----------|----------|-----------|---|--------------------|
| Cellular Component | GO:0016461 | unconventional myosin complex       | 3/2341 | 10/19559 | 0.1079743 | 0.446429 | 0.4002467 | 3 | MYO18B/MYO5A/MYO1C |
| Cellular Component | GO:0042583 | chromaffin granule                  | 3/2341 | 10/19559 | 0.1079743 | 0.446429 | 0.4002467 | 3 | ATP8A1/CLU/ANXA7   |
| Cellular Component | GO:0098981 | cholinergic synapse                 | 3/2341 | 10/19559 | 0.1079743 | 0.446429 | 0.4002467 | 3 | PLD1/DLGAP4/CHRM2  |
| Cellular Component | GO:1990124 | messenger ribonucleoprotein complex | 3/2341 | 10/19559 | 0.1079743 | 0.446429 | 0.4002467 | 3 | LSM1/PKP1/CPEB3    |
| Cellular Component | GO:0000938 | GARP complex                        | 2/2341 | 5/19559  | 0.1119211 | 0.446429 | 0.4002467 | 2 | VPS53/VPS51        |
| Cellular Component | GO:0005638 | lamin filament                      | 2/2341 | 5/19559  | 0.1119211 | 0.446429 | 0.4002467 | 2 | NARF/LMNB2         |
| Cellular Component | GO:0005827 | polar microtubule                   | 2/2341 | 5/19559  | 0.1119211 | 0.446429 | 0.4002467 | 2 | CUL3/KLHL21        |
| Cellular Component | GO:0008622 | epsilon DNA polymerase complex      | 2/2341 | 5/19559  | 0.1119211 | 0.446429 | 0.4002467 | 2 | POLE/POLE4         |
| Cellular Component | GO:0030124 | AP-4 adaptor complex                | 2/2341 | 5/19559  | 0.1119211 | 0.446429 | 0.4002467 | 2 | AP4S1/TEPSIN       |

|                    |            |                                          |        |         |           |          |           |   |                |
|--------------------|------------|------------------------------------------|--------|---------|-----------|----------|-----------|---|----------------|
| Cellular Component | GO:0033263 | CORVET complex                           | 2/2341 | 5/19559 | 0.1119211 | 0.446429 | 0.4002467 | 2 | TGFBRAP1/VPS18 |
| Cellular Component | GO:0044094 | host cell nuclear part                   | 2/2341 | 5/19559 | 0.1119211 | 0.446429 | 0.4002467 | 2 | PI4KA/SHFL     |
| Cellular Component | GO:0048476 | Holliday junction resolvase complex      | 2/2341 | 5/19559 | 0.1119211 | 0.446429 | 0.4002467 | 2 | EME1/SLX4      |
| Cellular Component | GO:0065010 | extracellular membrane-bounded organelle | 2/2341 | 5/19559 | 0.1119211 | 0.446429 | 0.4002467 | 2 | ALPL/AQP1      |
| Cellular Component | GO:0070390 | transcription export complex 2           | 2/2341 | 5/19559 | 0.1119211 | 0.446429 | 0.4002467 | 2 | ENY2/PCID2     |
| Cellular Component | GO:0072557 | IAPF inflammasome complex                | 2/2341 | 5/19559 | 0.1119211 | 0.446429 | 0.4002467 | 2 | NLRC4/CASP1    |
| Cellular Component | GO:0097124 | cyclin A2-CDK2 complex                   | 2/2341 | 5/19559 | 0.1119211 | 0.446429 | 0.4002467 | 2 | CCNA1/CCNP     |
| Cellular Component | GO:0097255 | R2TP complex                             | 2/2341 | 5/19559 | 0.1119211 | 0.446429 | 0.4002467 | 2 | PIH1D1/RUVBL1  |
| Cellular Component | GO:0097418 | neurofibrillary tangle                   | 2/2341 | 5/19559 | 0.1119211 | 0.446429 | 0.4002467 | 2 | NEFM/CLU       |

|                    |            |                                                |        |          |           |          |           |   |                               |
|--------------------|------------|------------------------------------------------|--------|----------|-----------|----------|-----------|---|-------------------------------|
| Cellular Component | GO:0098574 | cytoplasmic side of lysosomal membrane         | 2/2341 | 5/19559  | 0.1119211 | 0.446429 | 0.4002467 | 2 | LITAF/CDIP1                   |
| Cellular Component | GO:0098826 | endoplasmic reticulum tubular network membrane | 2/2341 | 5/19559  | 0.1119211 | 0.446429 | 0.4002467 | 2 | RTN4/ATL1                     |
| Cellular Component | GO:1990726 | Lsm1-7-Pat1 complex                            | 2/2341 | 5/19559  | 0.1119211 | 0.446429 | 0.4002467 | 2 | LSM1/LSM7                     |
| Cellular Component | GO:1990745 | EARP complex                                   | 2/2341 | 5/19559  | 0.1119211 | 0.446429 | 0.4002467 | 2 | VPS53/VPS51                   |
| Cellular Component | GO:0042575 | DNA polymerase complex                         | 5/2341 | 22/19559 | 0.1141808 | 0.446429 | 0.4002467 | 5 | POLE/POLA2/CRCP/POLD3/POLE4   |
| Cellular Component | GO:0071782 | endoplasmic reticulum tubular network          | 5/2341 | 22/19559 | 0.1141808 | 0.446429 | 0.4002467 | 5 | RTN4/ATL1/ASPH/C2CD2L/STIMATE |
| Cellular Component | GO:0005767 | secondary lysosome                             | 4/2341 | 16/19559 | 0.1152882 | 0.446429 | 0.4002467 | 4 | NCF4/NCF2/CRHBP/NCOA4         |
| Cellular Component | GO:0016442 | RISC complex                                   | 4/2341 | 16/19559 | 0.1152882 | 0.446429 | 0.4002467 | 4 | AGO1/LIMD1/AGO2/SND1          |
| Cellular Component | GO:0031332 | RNAi effector complex                          | 4/2341 | 16/19559 | 0.1152882 | 0.446429 | 0.4002467 | 4 | AGO1/LIMD1/AGO2/SND1          |

|                    |            |                                                                   |         |           |           |          |           |    |                                                                                                                                                                                                         |
|--------------------|------------|-------------------------------------------------------------------|---------|-----------|-----------|----------|-----------|----|---------------------------------------------------------------------------------------------------------------------------------------------------------------------------------------------------------|
| Cellular Component | GO:0070382 | exocytic vesicle                                                  | 33/2341 | 223/19559 | 0.1158779 | 0.446429 | 0.4002467 | 33 | VTI1A/SV2C/RAB5B/ATP8A1/STON1/BIN1/DISC1/RAB27A/DDC/APP/SYN3/PTPRN2/TMEM163/APBA2/RAB40C/IQSEC1/MCTP2/COP5/SYN2/KIRREL3/DNM1/PI4K2A/SYNGR3/KIF1B/RPH3A/DNM1L/SYT17/BCL2L1/NDEL1/DTNBP1/SYPL2/NTF4/CBARP |
| Cellular Component | GO:0005595 | collagen type XII trimer                                          | 1/2341  | 1/19559   | 0.1196891 | 0.446429 | 0.4002467 | 1  | COL12A1                                                                                                                                                                                                 |
| Cellular Component | GO:0005596 | collagen type XIV trimer                                          | 1/2341  | 1/19559   | 0.1196891 | 0.446429 | 0.4002467 | 1  | COL14A1                                                                                                                                                                                                 |
| Cellular Component | GO:0009360 | DNA polymerase III complex                                        | 1/2341  | 1/19559   | 0.1196891 | 0.446429 | 0.4002467 | 1  | CRCP                                                                                                                                                                                                    |
| Cellular Component | GO:0014804 | terminal cisterna lumen                                           | 1/2341  | 1/19559   | 0.1196891 | 0.446429 | 0.4002467 | 1  | CASQ1                                                                                                                                                                                                   |
| Cellular Component | GO:0030526 | granulocyte macrophage colony-stimulating factor receptor complex | 1/2341  | 1/19559   | 0.1196891 | 0.446429 | 0.4002467 | 1  | CSF2RB                                                                                                                                                                                                  |
| Cellular Component | GO:0031257 | cell trailing edge membrane                                       | 1/2341  | 1/19559   | 0.1196891 | 0.446429 | 0.4002467 | 1  | SCIMP                                                                                                                                                                                                   |
| Cellular Component | GO:0031259 | uropod membrane                                                   | 1/2341  | 1/19559   | 0.1196891 | 0.446429 | 0.4002467 | 1  | SCIMP                                                                                                                                                                                                   |
| Cellular Component | GO:0032996 | Bcl3-Bcl10 complex                                                | 1/2341  | 1/19559   | 0.1196891 | 0.446429 | 0.4002467 | 1  | BCL3                                                                                                                                                                                                    |

|                    |            |                             |        |         |           |          |           |   |        |
|--------------------|------------|-----------------------------|--------|---------|-----------|----------|-----------|---|--------|
| Cellular Component | GO:0033593 | BRCA2-MAGE-D1 complex       | 1/2341 | 1/19559 | 0.1196891 | 0.446429 | 0.4002467 | 1 | BRCA2  |
| Cellular Component | GO:0034423 | autophagosome lumen         | 1/2341 | 1/19559 | 0.1196891 | 0.446429 | 0.4002467 | 1 | DAPK2  |
| Cellular Component | GO:0034777 | recycling endosome lumen    | 1/2341 | 1/19559 | 0.1196891 | 0.446429 | 0.4002467 | 1 | PDLIM4 |
| Cellular Component | GO:0035525 | NF-kappaB p50/p65 complex   | 1/2341 | 1/19559 | 0.1196891 | 0.446429 | 0.4002467 | 1 | RELA   |
| Cellular Component | GO:0043509 | activin A complex           | 1/2341 | 1/19559 | 0.1196891 | 0.446429 | 0.4002467 | 1 | INHBA  |
| Cellular Component | GO:0048180 | activin complex             | 1/2341 | 1/19559 | 0.1196891 | 0.446429 | 0.4002467 | 1 | INHBA  |
| Cellular Component | GO:0055028 | cortical microtubule        | 1/2341 | 1/19559 | 0.1196891 | 0.446429 | 0.4002467 | 1 | NUMA1  |
| Cellular Component | GO:0060987 | lipid tube                  | 1/2341 | 1/19559 | 0.1196891 | 0.446429 | 0.4002467 | 1 | BIN1   |
| Cellular Component | GO:0061828 | apical tubulobulbar complex | 1/2341 | 1/19559 | 0.1196891 | 0.446429 | 0.4002467 | 1 | DNM3   |



|                    |            |                                                        |        |         |           |          |           |   |  |         |
|--------------------|------------|--------------------------------------------------------|--------|---------|-----------|----------|-----------|---|--|---------|
| Cellular Component | GO:0061829 | basal tubulobulbar complex                             | 1/2341 | 1/19559 | 0.1196891 | 0.446429 | 0.4002467 | 1 |  | DNM3    |
| Cellular Component | GO:0061845 | neuron projection branch point                         | 1/2341 | 1/19559 | 0.1196891 | 0.446429 | 0.4002467 | 1 |  | BAIAP2  |
| Cellular Component | GO:0061846 | dendritic spine cytoplasm                              | 1/2341 | 1/19559 | 0.1196891 | 0.446429 | 0.4002467 | 1 |  | BAIAP2  |
| Cellular Component | GO:0070772 | PAS complex                                            | 1/2341 | 1/19559 | 0.1196891 | 0.446429 | 0.4002467 | 1 |  | VAC14   |
| Cellular Component | GO:0070826 | paraferritin complex                                   | 1/2341 | 1/19559 | 0.1196891 | 0.446429 | 0.4002467 | 1 |  | SLC11A2 |
| Cellular Component | GO:0071513 | phosphopantothenoylcysteine decarboxylase complex      | 1/2341 | 1/19559 | 0.1196891 | 0.446429 | 0.4002467 | 1 |  | PPCDC   |
| Cellular Component | GO:0071575 | integral component of external side of plasma membrane | 1/2341 | 1/19559 | 0.1196891 | 0.446429 | 0.4002467 | 1 |  | CEACAM5 |
| Cellular Component | GO:0071665 | gamma-catenin-TCF7L2 complex                           | 1/2341 | 1/19559 | 0.1196891 | 0.446429 | 0.4002467 | 1 |  | JUP     |
| Cellular Component | GO:0097409 | glial cytoplasmic inclusion                            | 1/2341 | 1/19559 | 0.1196891 | 0.446429 | 0.4002467 | 1 |  | FBXO7   |

|                    |            |                                         |        |         |           |          |           |   |        |
|--------------------|------------|-----------------------------------------|--------|---------|-----------|----------|-----------|---|--------|
| Cellular Component | GO:0097414 | classical Lewy body                     | 1/2341 | 1/19559 | 0.1196891 | 0.446429 | 0.4002467 | 1 | FBXO7  |
| Cellular Component | GO:0097462 | Lewy neurite                            | 1/2341 | 1/19559 | 0.1196891 | 0.446429 | 0.4002467 | 1 | FBXO7  |
| Cellular Component | GO:0098830 | presynaptic endosome                    | 1/2341 | 1/19559 | 0.1196891 | 0.446429 | 0.4002467 | 1 | AP3D1  |
| Cellular Component | GO:0099020 | perinuclear endoplasmic reticulum lumen | 1/2341 | 1/19559 | 0.1196891 | 0.446429 | 0.4002467 | 1 | CLU    |
| Cellular Component | GO:1902912 | pyruvate kinase complex                 | 1/2341 | 1/19559 | 0.1196891 | 0.446429 | 0.4002467 | 1 | PKM    |
| Cellular Component | GO:1905720 | cytoplasmic microtubule bundle          | 1/2341 | 1/19559 | 0.1196891 | 0.446429 | 0.4002467 | 1 | NUMA1  |
| Cellular Component | GO:1990031 | pinceau fiber                           | 1/2341 | 1/19559 | 0.1196891 | 0.446429 | 0.4002467 | 1 | KCNAB2 |
| Cellular Component | GO:1990038 | Lewy body corona                        | 1/2341 | 1/19559 | 0.1196891 | 0.446429 | 0.4002467 | 1 | FBXO7  |
| Cellular Component | GO:1990332 | Ire1 complex                            | 1/2341 | 1/19559 | 0.1196891 | 0.446429 | 0.4002467 | 1 | ERN1   |

|                    |            |                                                                                              |         |           |           |           |           |    |                                                                                                        |
|--------------------|------------|----------------------------------------------------------------------------------------------|---------|-----------|-----------|-----------|-----------|----|--------------------------------------------------------------------------------------------------------|
| Cellular Component | GO:1990673 | intrinsic component of endoplasmic reticulum-Golgi intermediate compartment (ERGIC) membrane | 1/2341  | 1/19559   | 0.1196891 | 0.446429  | 0.4002467 | 1  | STING1                                                                                                 |
| Cellular Component | GO:1990701 | integral component of endoplasmic reticulum-Golgi intermediate compartment (ERGIC) membrane  | 1/2341  | 1/19559   | 0.1196891 | 0.446429  | 0.4002467 | 1  | STING1                                                                                                 |
| Cellular Component | GO:0030125 | clathrin vesicle coat                                                                        | 6/2341  | 29/19559  | 0.1252632 | 0.4627556 | 0.4148843 | 6  | AP2A1/EPN2/AP1G2/EPS15/EPN3/CLTCL1                                                                     |
| Cellular Component | GO:0044665 | MLL1/2 complex                                                                               | 6/2341  | 29/19559  | 0.1252632 | 0.4627556 | 0.4148843 | 6  | ASH2L/KANSL1/MGA/E2F6/CHD8/RUVBL1                                                                      |
| Cellular Component | GO:0071339 | MLL1 complex                                                                                 | 6/2341  | 29/19559  | 0.1252632 | 0.4627556 | 0.4148843 | 6  | ASH2L/KANSL1/MGA/E2F6/CHD8/RUVBL1                                                                      |
| Cellular Component | GO:0000118 | histone deacetylase complex                                                                  | 13/2341 | 77/19559  | 0.1260085 | 0.4640314 | 0.4160281 | 13 | HDAC4/NCOR2/SRCAP/ZNF217/HDAC7/SIN3B/GATAD2A/HDAC1/MTA1/PHF12/MTA2/RUVBL1/MECOM                        |
| Cellular Component | GO:0030120 | vesicle coat                                                                                 | 10/2341 | 56/19559  | 0.1265364 | 0.4645006 | 0.4164488 | 10 | AP2A1/SEC23B/EPN2/SEC13/SEC24C/AP1G2/EPS15/EPN3/CLTCL1/SEC31A                                          |
| Cellular Component | GO:0030175 | filopodium                                                                                   | 17/2341 | 106/19559 | 0.1279753 | 0.4683009 | 0.419856  | 17 | AP2A1/FGD4/DYNC1H1/LY6G6D/SPATA13/BAIAP2/APP/SCIMP/FARP1/MYO5A/ITGB3/PALM/FSCN3/CYFIP1/EZR/ADGRA2/ACP3 |
| Cellular Component | GO:0008180 | COP9 signalosome                                                                             | 7/2341  | 36/19559  | 0.1317721 | 0.4791712 | 0.4296017 | 7  | LAT/MYH9/COPS5/COPS3/TMOD1/PLCG1/FLOT1                                                                 |

|                    |            |                                              |         |           |           |           |           |    |                                                                                                                                                                                                                                                                                                                    |
|--------------------|------------|----------------------------------------------|---------|-----------|-----------|-----------|-----------|----|--------------------------------------------------------------------------------------------------------------------------------------------------------------------------------------------------------------------------------------------------------------------------------------------------------------------|
| Cellular Component | GO:0098636 | protein complex involved in cell adhesion    | 7/2341  | 36/19559  | 0.1317721 | 0.4791712 | 0.4296017 | 7  | ITGAE/ITGA2B/ITGB5/JAM3/ITGB3/ITGB2/ITGB6                                                                                                                                                                                                                                                                          |
| Cellular Component | GO:0001650 | fibrillar center                             | 20/2341 | 129/19559 | 0.1356671 | 0.4902466 | 0.4395314 | 20 | TRIM27/RREB1/TAF1C/WDR43/SP140/NFIC/POLR2F/SAMD4A/SMAD7/MBD6/MLLT1/MAP3K14/ACACA/ANKRD1/PLRG1/EZR/FBL/EEF1D/IP6K1/UTP4                                                                                                                                                                                             |
| Cellular Component | GO:0097470 | ribbon synapse                               | 3/2341  | 11/19559  | 0.1357985 | 0.4902466 | 0.4395314 | 3  | CTBP2/DNM1/NPHP4                                                                                                                                                                                                                                                                                                   |
| Cellular Component | GO:0098687 | chromosomal region                           | 49/2341 | 350/19559 | 0.1367793 | 0.4902466 | 0.4395314 | 49 | BLM/DCTN1/BAZ1B/MAD1L1/TNKS/NDE1/BRCA2/HMBOX1/KANSL1/RTTEL1/NSMCE2/MCM5/CHAMP1/WRNIP1/MIS12/UVRAG/ZNF276/WDR82/DCTN2/PPP2R5C/STAG1/KDM4C/SEC13/MCM2/SMG6/PPP2R1A/PPP1CB/RAD21L1/DMC1/DNMT1/TP53BP1/CDCA5/SP100/CHEK2/CEBPB/ERCC1/CENPM/SPAG5/ZNF330/SLX4/FBXW11/NDEL1/KAT7/DYDC2/DYDC1/PEL1/TFIP11/TERB2/MACROH2A2 |
| Cellular Component | GO:0042622 | photoreceptor outer segment membrane         | 4/2341  | 17/19559  | 0.1371968 | 0.4902466 | 0.4395314 | 4  | PDE6A/GNAT2/PDE6H/CDHR1                                                                                                                                                                                                                                                                                            |
| Cellular Component | GO:0061702 | inflammasome complex                         | 4/2341  | 17/19559  | 0.1371968 | 0.4902466 | 0.4395314 | 4  | NLRC4/AIM2/NLRP3/CASP1                                                                                                                                                                                                                                                                                             |
| Cellular Component | GO:0098862 | cluster of actin-based cell projections      | 24/2341 | 159/19559 | 0.1373536 | 0.4902466 | 0.4395314 | 24 | CDH23/ABCC2/SLC11A2/TRPM6/MYH9/ATP8B1/ACTN1/ACTN4/SLC19A1/AQP1/CDHR2/ESPN/SLC22A5/MFSD10/TSPPEAR/DNM1L/SHANK2/GNA12/FLII/TMC1/MYO1C/CDC14A/EZR/PDZK1                                                                                                                                                               |
| Cellular Component | GO:0097431 | mitotic spindle pole                         | 6/2341  | 30/19559  | 0.1416373 | 0.5039856 | 0.4518492 | 6  | MAD1L1/TNKS/RAE1/STAG1/NUMA1/SPAG5                                                                                                                                                                                                                                                                                 |
| Cellular Component | GO:0008287 | protein serine/threonine phosphatase complex | 9/2341  | 51/19559  | 0.1501248 | 0.5286055 | 0.4739221 | 9  | ITPR1/WDR82/PPP2R5C/PPP2R1A/PPP1CB/PPP2R5E/PPP2R5D/PPP2R1B/PTPA                                                                                                                                                                                                                                                    |

|                    |            |                                     |         |           |           |           |           |    |                                                                                                                                                                   |
|--------------------|------------|-------------------------------------|---------|-----------|-----------|-----------|-----------|----|-------------------------------------------------------------------------------------------------------------------------------------------------------------------|
| Cellular Component | GO:1903293 | phosphatase complex                 | 9/2341  | 51/19559  | 0.1501248 | 0.5286055 | 0.4739221 | 9  | ITPR1/WDR82/PPP2R5C/PPP2R1A/PPP1CB/PPP2R5E/PPP2R5D/PPP2R1B/PTPA                                                                                                   |
| Cellular Component | GO:0032588 | trans-Golgi network membrane        | 15/2341 | 94/19559  | 0.1503822 | 0.5286055 | 0.4739221 | 15 | VTI1A/VPS53/AP4S1/KIF13A/RAB31/APP/AP1B1/COG1/RAB43/COG8/USP6NL/COG5/ATP7B/VPS51/TEPSIN                                                                           |
| Cellular Component | GO:0043601 | nuclear replisome                   | 5/2341  | 24/19559  | 0.1515853 | 0.5286055 | 0.4739221 | 5  | POLA2/SMARCAL1/PLRG1/POLD3/XPA                                                                                                                                    |
| Cellular Component | GO:0030426 | growth cone                         | 27/2341 | 184/19559 | 0.153456  | 0.5286055 | 0.4739221 | 27 | CTSZ/LMTK2/TIMP2/SSH1/APBB2/AMFR/CTTN/DNM2/DISC1/IGHMBP2/APP/PREX1/DCTN2/KIF21B/MYO5A/WDR47/KIF5C/SHANK2/FSCN3/CYFIP1/TRPV2/NDEL1/DTNBP1/OTX2/NDRG2/CBARP/NECTIN1 |
| Cellular Component | GO:0005593 | FACIT collagen trimer               | 2/2341  | 6/19559   | 0.1549361 | 0.5286055 | 0.4739221 | 2  | COL12A1/COL14A1                                                                                                                                                   |
| Cellular Component | GO:0032010 | phagolysosome                       | 2/2341  | 6/19559   | 0.1549361 | 0.5286055 | 0.4739221 | 2  | NCF4/NCF2                                                                                                                                                         |
| Cellular Component | GO:0070937 | CRD-mediated mRNA stability complex | 2/2341  | 6/19559   | 0.1549361 | 0.5286055 | 0.4739221 | 2  | CSDE1/SYNCRIP                                                                                                                                                     |
| Cellular Component | GO:0097169 | AIM2 inflammasome complex           | 2/2341  | 6/19559   | 0.1549361 | 0.5286055 | 0.4739221 | 2  | AIM2/CASP1                                                                                                                                                        |
| Cellular Component | GO:0097342 | riposome                            | 2/2341  | 6/19559   | 0.1549361 | 0.5286055 | 0.4739221 | 2  | RIPK1/FADD                                                                                                                                                        |

|                    |            |                                                            |        |          |           |           |           |   |                                      |
|--------------------|------------|------------------------------------------------------------|--------|----------|-----------|-----------|-----------|---|--------------------------------------|
| Cellular Component | GO:0097433 | dense body                                                 | 2/2341 | 6/19559  | 0.1549361 | 0.5286055 | 0.4739221 | 2 | ACTG1/SND1                           |
| Cellular Component | GO:0097443 | sorting endosome                                           | 2/2341 | 6/19559  | 0.1549361 | 0.5286055 | 0.4739221 | 2 | ARHGAP1/CLTCL1                       |
| Cellular Component | GO:0150051 | postsynaptic Golgi apparatus                               | 2/2341 | 6/19559  | 0.1549361 | 0.5286055 | 0.4739221 | 2 | MYO18A/FAM234B                       |
| Cellular Component | GO:1905347 | endodeoxyribonuclease complex                              | 2/2341 | 6/19559  | 0.1549361 | 0.5286055 | 0.4739221 | 2 | EME1/SLX4                            |
| Cellular Component | GO:0008305 | integrin complex                                           | 6/2341 | 31/19559 | 0.158937  | 0.5406655 | 0.4847346 | 6 | ITGAE/ITGA2B/ITGB5/ITGB3/ITGB2/ITGB6 |
| Cellular Component | GO:0000109 | nucleotide-excision repair complex                         | 3/2341 | 12/19559 | 0.1657386 | 0.5556553 | 0.4981737 | 3 | ERCC1/SLX4/XPA                       |
| Cellular Component | GO:0019908 | nuclear cyclin-dependent protein kinase holoenzyme complex | 3/2341 | 12/19559 | 0.1657386 | 0.5556553 | 0.4981737 | 3 | CCNH/RB1/CDK13                       |
| Cellular Component | GO:0030128 | clathrin coat of endocytic vesicle                         | 3/2341 | 12/19559 | 0.1657386 | 0.5556553 | 0.4981737 | 3 | AP2A1/EPN2/EPS15                     |
| Cellular Component | GO:0031932 | TORC2 complex                                              | 3/2341 | 12/19559 | 0.1657386 | 0.5556553 | 0.4981737 | 3 | PRR5L/PRR5/TTI1                      |

|                    |            |                             |         |           |           |           |           |    |                                                                                                                                                                      |
|--------------------|------------|-----------------------------|---------|-----------|-----------|-----------|-----------|----|----------------------------------------------------------------------------------------------------------------------------------------------------------------------|
| Cellular Component | GO:0044615 | nuclear pore nuclear basket | 3/2341  | 12/19559  | 0.1657386 | 0.5556553 | 0.4981737 | 3  | MAD1L1/ENY2/PCID2                                                                                                                                                    |
| Cellular Component | GO:0060170 | ciliary membrane            | 12/2341 | 74/19559  | 0.169735  | 0.5659831 | 0.5074331 | 12 | EHD1/PDE6A/IQCE/PKD1L1/GNAT2/CNGA4/PDE6H/TSPPEAR/CDHR1/SHANK2/EPS15/TXNDC15                                                                                          |
| Cellular Component | GO:0030136 | clathrin-coated vesicle     | 28/2341 | 194/19559 | 0.1697949 | 0.5659831 | 0.5074331 | 28 | CPNE6/AP2A1/TGFA/CD9/VTI1A/DENND1A/AAK1/DNM2/SFTPD/STON1/RAB27A/SNX3/AP1B1/EPN2/VPS18/NUMB/CHRM2/SH3BP4/SNX18/SORT1/AP1G2/ASTN2/EPS15/EPN3/INPP5F/CLTCL1/DBNL/PHETA1 |
| Cellular Component | GO:0099522 | region of cytosol           | 5/2341  | 25/19559  | 0.1719735 | 0.5716025 | 0.5124712 | 5  | BAIAP2/PRKCB/HTT/CTBP2/NEDD4                                                                                                                                         |
| Cellular Component | GO:0030672 | synaptic vesicle membrane   | 16/2341 | 104/19559 | 0.1757887 | 0.5809541 | 0.5208554 | 16 | SV2C/RAB5B/ATP8A1/SYN3/PTPRN2/TMEM163/MCTP2/SYN2/PI4K2A/SYNGR3/RPH3A/DNM1L/BCL2L1/DTNBP1/SYPL2/CBARP                                                                 |
| Cellular Component | GO:0099501 | exocytic vesicle membrane   | 16/2341 | 104/19559 | 0.1757887 | 0.5809541 | 0.5208554 | 16 | SV2C/RAB5B/ATP8A1/SYN3/PTPRN2/TMEM163/MCTP2/SYN2/PI4K2A/SYNGR3/RPH3A/DNM1L/BCL2L1/DTNBP1/SYPL2/CBARP                                                                 |
| Cellular Component | GO:0043034 | costamere                   | 4/2341  | 19/19559  | 0.1853636 | 0.5906504 | 0.5295487 | 4  | AHNAK/ILK/SVIL/ANK2                                                                                                                                                  |
| Cellular Component | GO:0097449 | astrocyte projection        | 4/2341  | 19/19559  | 0.1853636 | 0.5906504 | 0.5295487 | 4  | APP/MLC1/SLC1A2/EZR                                                                                                                                                  |
| Cellular Component | GO:0001917 | photoreceptor inner segment | 10/2341 | 61/19559  | 0.1886665 | 0.5906504 | 0.5295487 | 10 | RCVRN/CRB1/KIAA0586/DNM2/CCDC66/GNAT2/GUK1/DNM1/DNM3/SHANK2                                                                                                          |

|                    |            |                                              |        |          |           |           |           |   |                                      |
|--------------------|------------|----------------------------------------------|--------|----------|-----------|-----------|-----------|---|--------------------------------------|
| Cellular Component | GO:0030894 | replisome                                    | 5/2341 | 26/19559 | 0.1933426 | 0.5906504 | 0.5295487 | 5 | POLA2/SMARCAL1/PLRG1/POLD3/XPA       |
| Cellular Component | GO:0070971 | endoplasmic reticulum exit site              | 6/2341 | 33/19559 | 0.1960467 | 0.5906504 | 0.5295487 | 6 | SEC23B/MIA3/SEC24C/SEC31A/MIA2/PLPP3 |
| Cellular Component | GO:0005614 | interstitial matrix                          | 3/2341 | 13/19559 | 0.1973693 | 0.5906504 | 0.5295487 | 3 | VIT/EGFLAM/COL14A1                   |
| Cellular Component | GO:0016580 | Sin3 complex                                 | 3/2341 | 13/19559 | 0.1973693 | 0.5906504 | 0.5295487 | 3 | SIN3B/HDAC1/PHF12                    |
| Cellular Component | GO:0017119 | Golgi transport complex                      | 3/2341 | 13/19559 | 0.1973693 | 0.5906504 | 0.5295487 | 3 | COG1/COG8/COG5                       |
| Cellular Component | GO:0030130 | clathrin coat of trans-Golgi network vesicle | 3/2341 | 13/19559 | 0.1973693 | 0.5906504 | 0.5295487 | 3 | AP2A1/AP1G2/CLTCL1                   |
| Cellular Component | GO:0032009 | early phagosome                              | 3/2341 | 13/19559 | 0.1973693 | 0.5906504 | 0.5295487 | 3 | RAB31/TLR9/SNX3                      |
| Cellular Component | GO:0032585 | multivesicular body membrane                 | 3/2341 | 13/19559 | 0.1973693 | 0.5906504 | 0.5295487 | 3 | SORL1/RAB27A/GIMAP5                  |
| Cellular Component | GO:0033646 | host intracellular part                      | 3/2341 | 13/19559 | 0.1973693 | 0.5906504 | 0.5295487 | 3 | AQP1/PI4KA/SHFL                      |



|                    |            |                                                  |         |           |           |           |           |    |                                                                                                                                                           |                 |
|--------------------|------------|--------------------------------------------------|---------|-----------|-----------|-----------|-----------|----|-----------------------------------------------------------------------------------------------------------------------------------------------------------|-----------------|
| Cellular Component | GO:0043656 | host intracellular region                        | 3/2341  | 13/19559  | 0.1973693 | 0.5906504 | 0.5295487 | 3  |                                                                                                                                                           | AQP1/PI4KA/SHFL |
| Cellular Component | GO:0097730 | non-motile cilium                                | 24/2341 | 167/19559 | 0.197635  | 0.5906504 | 0.5295487 | 24 | RCVRN/PDE6A/PKD1L1/RAB27A/CCDC66/GNAT2/MYO5A/GNA11/PDE6H/TLL4/IFT140/SDCCAG8/RPGRIP1/CDHR1/SHANK2/GRK7/KIFAP3/CDC14A/HYLS1/EYS/NPFFR1/PRLHR/NPHP4/SEPTIN9 |                 |
| Cellular Component | GO:0016272 | prefoldin complex                                | 2/2341  | 7/19559   | 0.2003794 | 0.5906504 | 0.5295487 | 2  |                                                                                                                                                           | PFDN2/PFDN6     |
| Cellular Component | GO:0030991 | intraciliary transport particle A                | 2/2341  | 7/19559   | 0.2003794 | 0.5906504 | 0.5295487 | 2  |                                                                                                                                                           | IFT140/TTC21B   |
| Cellular Component | GO:0035032 | phosphatidylinositol 3-kinase complex, class III | 2/2341  | 7/19559   | 0.2003794 | 0.5906504 | 0.5295487 | 2  |                                                                                                                                                           | VAC14/ATG14     |
| Cellular Component | GO:0038037 | G protein-coupled receptor dimeric complex       | 2/2341  | 7/19559   | 0.2003794 | 0.5906504 | 0.5295487 | 2  |                                                                                                                                                           | GABBR1/GABBR2   |
| Cellular Component | GO:0042025 | host cell nucleus                                | 2/2341  | 7/19559   | 0.2003794 | 0.5906504 | 0.5295487 | 2  |                                                                                                                                                           | PI4KA/SHFL      |
| Cellular Component | GO:0042584 | chromaffin granule membrane                      | 2/2341  | 7/19559   | 0.2003794 | 0.5906504 | 0.5295487 | 2  |                                                                                                                                                           | ATP8A1/ANXA7    |
| Cellular Component | GO:0042587 | glycogen granule                                 | 2/2341  | 7/19559   | 0.2003794 | 0.5906504 | 0.5295487 | 2  |                                                                                                                                                           | PCYT1A/PPP1CB   |

|                    |            |                                                           |         |           |           |           |           |    |                                                                                                                   |
|--------------------|------------|-----------------------------------------------------------|---------|-----------|-----------|-----------|-----------|----|-------------------------------------------------------------------------------------------------------------------|
| Cellular Component | GO:0044545 | NSL complex                                               | 2/2341  | 7/19559   | 0.2003794 | 0.5906504 | 0.5295487 | 2  | KANSL1/KANSL2                                                                                                     |
| Cellular Component | GO:0051286 | cell tip                                                  | 2/2341  | 7/19559   | 0.2003794 | 0.5906504 | 0.5295487 | 2  | PI4K2A/EZR                                                                                                        |
| Cellular Component | GO:0071541 | eukaryotic translation initiation factor 3 complex, eIF3m | 2/2341  | 7/19559   | 0.2003794 | 0.5906504 | 0.5295487 | 2  | EIF3M/EIF3H                                                                                                       |
| Cellular Component | GO:0072357 | PTW/PP1 phosphatase complex                               | 2/2341  | 7/19559   | 0.2003794 | 0.5906504 | 0.5295487 | 2  | WDR82/PPP1CB                                                                                                      |
| Cellular Component | GO:0098684 | photoreceptor ribbon synapse                              | 2/2341  | 7/19559   | 0.2003794 | 0.5906504 | 0.5295487 | 2  | CTBP2/DNM1                                                                                                        |
| Cellular Component | GO:0098835 | presynaptic endocytic zone membrane                       | 2/2341  | 7/19559   | 0.2003794 | 0.5906504 | 0.5295487 | 2  | DNM1/DNM1L                                                                                                        |
| Cellular Component | GO:0043679 | axon terminus                                             | 19/2341 | 130/19559 | 0.208965  | 0.5906504 | 0.5295487 | 19 | KCNAB2/AAK1/SLC8A1/MICAL1/TANC1/PNOC/ITSN1/GIT1/ILK/PTPRN2/CRHBP/PRKCB/ACTG1/CHRM2/RGS10/AP3D1/CYFIP1/RNF40/CABP4 |
| Cellular Component | GO:0036019 | endolysosome                                              | 4/2341  | 20/19559  | 0.2112337 | 0.5906504 | 0.5295487 | 4  | AP2A1/TLR9/CLEC16A/CTSB                                                                                           |
| Cellular Component | GO:0001891 | phagocytic cup                                            | 5/2341  | 27/19559  | 0.2155767 | 0.5906504 | 0.5295487 | 5  | DNM2/RAB31/TNF/ARHGAP25/ARHGAP12                                                                                  |

|                    |            |                                                              |        |          |           |           |           |   |                                   |
|--------------------|------------|--------------------------------------------------------------|--------|----------|-----------|-----------|-----------|---|-----------------------------------|
| Cellular Component | GO:1990752 | microtubule end                                              | 6/2341 | 34/19559 | 0.2157093 | 0.5906504 | 0.5295487 | 6 | DCTN1/NAV3/SVIL/MYO5A/NUMA1/SPAG5 |
| Cellular Component | GO:0000274 | mitochondrial proton-transporting ATP synthase, stator stalk | 1/2341 | 2/19559  | 0.2250582 | 0.5906504 | 0.5295487 | 1 | ATP5PD                            |
| Cellular Component | GO:0000806 | Y chromosome                                                 | 1/2341 | 2/19559  | 0.2250582 | 0.5906504 | 0.5295487 | 1 | SIN3B                             |
| Cellular Component | GO:0001651 | dense fibrillar component                                    | 1/2341 | 2/19559  | 0.2250582 | 0.5906504 | 0.5295487 | 1 | FBL                               |
| Cellular Component | GO:0002096 | polkadots                                                    | 1/2341 | 2/19559  | 0.2250582 | 0.5906504 | 0.5295487 | 1 | BCL10                             |
| Cellular Component | GO:0002945 | cyclin K-CDK13 complex                                       | 1/2341 | 2/19559  | 0.2250582 | 0.5906504 | 0.5295487 | 1 | CDK13                             |
| Cellular Component | GO:0005602 | complement component C1 complex                              | 1/2341 | 2/19559  | 0.2250582 | 0.5906504 | 0.5295487 | 1 | C1QB                              |
| Cellular Component | GO:0005668 | RNA polymerase transcription factor SL1 complex              | 1/2341 | 2/19559  | 0.2250582 | 0.5906504 | 0.5295487 | 1 | TAF1D                             |
| Cellular Component | GO:0005745 | m-AAA complex                                                | 1/2341 | 2/19559  | 0.2250582 | 0.5906504 | 0.5295487 | 1 | SPG7                              |

|                    |            |                                             |        |         |           |           |           |   |       |
|--------------------|------------|---------------------------------------------|--------|---------|-----------|-----------|-----------|---|-------|
| Cellular Component | GO:0016222 | procollagen-proline 4-dioxygenase complex   | 1/2341 | 2/19559 | 0.2250582 | 0.5906504 | 0.5295487 | 1 | P4HB  |
| Cellular Component | GO:0020005 | symbiont-containing vacuole membrane        | 1/2341 | 2/19559 | 0.2250582 | 0.5906504 | 0.5295487 | 1 | AQP1  |
| Cellular Component | GO:0030692 | Noc4p-Nop14p complex                        | 1/2341 | 2/19559 | 0.2250582 | 0.5906504 | 0.5295487 | 1 | NOP14 |
| Cellular Component | GO:0030849 | autosome                                    | 1/2341 | 2/19559 | 0.2250582 | 0.5906504 | 0.5295487 | 1 | SIN3B |
| Cellular Component | GO:0031213 | RSF complex                                 | 1/2341 | 2/19559 | 0.2250582 | 0.5906504 | 0.5295487 | 1 | RSF1  |
| Cellular Component | GO:0031380 | nuclear RNA-directed RNA polymerase complex | 1/2341 | 2/19559 | 0.2250582 | 0.5906504 | 0.5295487 | 1 | ZNFX1 |
| Cellular Component | GO:0032311 | angiogenin-PR1 complex                      | 1/2341 | 2/19559 | 0.2250582 | 0.5906504 | 0.5295487 | 1 | RNH1  |
| Cellular Component | GO:0032398 | MHC class Ib protein complex                | 1/2341 | 2/19559 | 0.2250582 | 0.5906504 | 0.5295487 | 1 | HLA-F |
| Cellular Component | GO:0033257 | Bcl3/NF-kappaB2 complex                     | 1/2341 | 2/19559 | 0.2250582 | 0.5906504 | 0.5295487 | 1 | BCL3  |

|                    |            |                               |        |         |           |           |           |   |        |
|--------------------|------------|-------------------------------|--------|---------|-----------|-----------|-----------|---|--------|
| Cellular Component | GO:0033596 | TSC1-TSC2 complex             | 1/2341 | 2/19559 | 0.2250582 | 0.5906504 | 0.5295487 | 1 | TSC2   |
| Cellular Component | GO:0034683 | integrin alphav-beta3 complex | 1/2341 | 2/19559 | 0.2250582 | 0.5906504 | 0.5295487 | 1 | ITGB3  |
| Cellular Component | GO:0034684 | integrin alphav-beta5 complex | 1/2341 | 2/19559 | 0.2250582 | 0.5906504 | 0.5295487 | 1 | ITGB5  |
| Cellular Component | GO:0034685 | integrin alphav-beta6 complex | 1/2341 | 2/19559 | 0.2250582 | 0.5906504 | 0.5295487 | 1 | ITGB6  |
| Cellular Component | GO:0034687 | integrin alphaL-beta2 complex | 1/2341 | 2/19559 | 0.2250582 | 0.5906504 | 0.5295487 | 1 | ITGB2  |
| Cellular Component | GO:0034688 | integrin alphaM-beta2 complex | 1/2341 | 2/19559 | 0.2250582 | 0.5906504 | 0.5295487 | 1 | ITGB2  |
| Cellular Component | GO:0034689 | integrin alphaX-beta2 complex | 1/2341 | 2/19559 | 0.2250582 | 0.5906504 | 0.5295487 | 1 | ITGB2  |
| Cellular Component | GO:0035189 | Rb-E2F complex                | 1/2341 | 2/19559 | 0.2250582 | 0.5906504 | 0.5295487 | 1 | RB1    |
| Cellular Component | GO:0035370 | UBC13-UEV1A complex           | 1/2341 | 2/19559 | 0.2250582 | 0.5906504 | 0.5295487 | 1 | UBE2V1 |

|                    |            |                                                |        |         |           |           |           |   |        |
|--------------------|------------|------------------------------------------------|--------|---------|-----------|-----------|-----------|---|--------|
| Cellular Component | GO:0035632 | mitochondrial prohibitin complex               | 1/2341 | 2/19559 | 0.2250582 | 0.5906504 | 0.5295487 | 1 | PHB    |
| Cellular Component | GO:0036117 | hyaluronan cable                               | 1/2341 | 2/19559 | 0.2250582 | 0.5906504 | 0.5295487 | 1 | HAS3   |
| Cellular Component | GO:0036186 | early phagosome membrane                       | 1/2341 | 2/19559 | 0.2250582 | 0.5906504 | 0.5295487 | 1 | RAB31  |
| Cellular Component | GO:0036284 | tubulobulbar complex                           | 1/2341 | 2/19559 | 0.2250582 | 0.5906504 | 0.5295487 | 1 | DNM3   |
| Cellular Component | GO:0036488 | CHOP-C/EBP complex                             | 1/2341 | 2/19559 | 0.2250582 | 0.5906504 | 0.5295487 | 1 | CEBPB  |
| Cellular Component | GO:0043511 | inhibin complex                                | 1/2341 | 2/19559 | 0.2250582 | 0.5906504 | 0.5295487 | 1 | INHBA  |
| Cellular Component | GO:0043512 | inhibin A complex                              | 1/2341 | 2/19559 | 0.2250582 | 0.5906504 | 0.5295487 | 1 | INHBA  |
| Cellular Component | GO:0045265 | proton-transporting ATP synthase, stator stalk | 1/2341 | 2/19559 | 0.2250582 | 0.5906504 | 0.5295487 | 1 | ATP5PD |
| Cellular Component | GO:0060053 | neurofilament cytoskeleton                     | 1/2341 | 2/19559 | 0.2250582 | 0.5906504 | 0.5295487 | 1 | NDEL1  |

|                    |            |                                      |        |         |           |           |           |   |        |
|--------------------|------------|--------------------------------------|--------|---------|-----------|-----------|-----------|---|--------|
| Cellular Component | GO:0061851 | leading edge of lamellipodium        | 1/2341 | 2/19559 | 0.2250582 | 0.5906504 | 0.5295487 | 1 | DUSP22 |
| Cellular Component | GO:0070418 | DNA-dependent protein kinase complex | 1/2341 | 2/19559 | 0.2250582 | 0.5906504 | 0.5295487 | 1 | UVRAG  |
| Cellular Component | GO:0071149 | TEAD-2-YAP complex                   | 1/2341 | 2/19559 | 0.2250582 | 0.5906504 | 0.5295487 | 1 | TEAD2  |
| Cellular Component | GO:0071159 | NF-kappaB complex                    | 1/2341 | 2/19559 | 0.2250582 | 0.5906504 | 0.5295487 | 1 | RELA   |
| Cellular Component | GO:0071819 | DUBm complex                         | 1/2341 | 2/19559 | 0.2250582 | 0.5906504 | 0.5295487 | 1 | ENY2   |
| Cellular Component | GO:0090537 | CERF complex                         | 1/2341 | 2/19559 | 0.2250582 | 0.5906504 | 0.5295487 | 1 | CECR2  |
| Cellular Component | GO:0090725 | peripheral region of growth cone     | 1/2341 | 2/19559 | 0.2250582 | 0.5906504 | 0.5295487 | 1 | CYFIP1 |
| Cellular Component | GO:0097057 | TRAF2-GSTP1 complex                  | 1/2341 | 2/19559 | 0.2250582 | 0.5906504 | 0.5295487 | 1 | TRAF2  |
| Cellular Component | GO:0097058 | CRLF-CLCF1 complex                   | 1/2341 | 2/19559 | 0.2250582 | 0.5906504 | 0.5295487 | 1 | CRLF1  |

|                    |            |                                                      |        |         |           |           |           |   |          |
|--------------------|------------|------------------------------------------------------|--------|---------|-----------|-----------|-----------|---|----------|
| Cellular Component | GO:0097123 | cyclin A1-CDK2 complex                               | 1/2341 | 2/19559 | 0.2250582 | 0.5906504 | 0.5295487 | 1 | CCNA1    |
| Cellular Component | GO:0097574 | lateral part of cell                                 | 1/2341 | 2/19559 | 0.2250582 | 0.5906504 | 0.5295487 | 1 | NUMA1    |
| Cellular Component | GO:0097575 | lateral cell cortex                                  | 1/2341 | 2/19559 | 0.2250582 | 0.5906504 | 0.5295487 | 1 | NUMA1    |
| Cellular Component | GO:0097635 | extrinsic component of autophagosome membrane        | 1/2341 | 2/19559 | 0.2250582 | 0.5906504 | 0.5295487 | 1 | ULK1     |
| Cellular Component | GO:0150001 | primary dendrite                                     | 1/2341 | 2/19559 | 0.2250582 | 0.5906504 | 0.5295487 | 1 | MAP1A    |
| Cellular Component | GO:1902560 | GMP reductase complex                                | 1/2341 | 2/19559 | 0.2250582 | 0.5906504 | 0.5295487 | 1 | GMPR2    |
| Cellular Component | GO:1904602 | serotonin-activated cation-selective channel complex | 1/2341 | 2/19559 | 0.2250582 | 0.5906504 | 0.5295487 | 1 | HTR3A    |
| Cellular Component | GO:1990026 | hippocampal mossy fiber expansion                    | 1/2341 | 2/19559 | 0.2250582 | 0.5906504 | 0.5295487 | 1 | MICAL1   |
| Cellular Component | GO:1990071 | TRAPP II protein complex                             | 1/2341 | 2/19559 | 0.2250582 | 0.5906504 | 0.5295487 | 1 | TRAPPC10 |



|                    |            |                                           |        |          |           |           |           |   |                                                |
|--------------------|------------|-------------------------------------------|--------|----------|-----------|-----------|-----------|---|------------------------------------------------|
| Cellular Component | GO:1990184 | amino acid transport complex              | 1/2341 | 2/19559  | 0.2250582 | 0.5906504 | 0.5295487 | 1 | SLC7A5                                         |
| Cellular Component | GO:1990462 | omegasome                                 | 1/2341 | 2/19559  | 0.2250582 | 0.5906504 | 0.5295487 | 1 | TRIM5                                          |
| Cellular Component | GO:1990572 | TERT-RMRP complex                         | 1/2341 | 2/19559  | 0.2250582 | 0.5906504 | 0.5295487 | 1 | RMRP                                           |
| Cellular Component | GO:1990589 | ATF4-CREB1 transcription factor complex   | 1/2341 | 2/19559  | 0.2250582 | 0.5906504 | 0.5295487 | 1 | CREB1                                          |
| Cellular Component | GO:1990597 | AIP1-IRE1 complex                         | 1/2341 | 2/19559  | 0.2250582 | 0.5906504 | 0.5295487 | 1 | ERN1                                           |
| Cellular Component | GO:1990630 | IRE1-RACK1-PP2A complex                   | 1/2341 | 2/19559  | 0.2250582 | 0.5906504 | 0.5295487 | 1 | ERN1                                           |
| Cellular Component | GO:1990682 | CSF1-CSF1R complex                        | 1/2341 | 2/19559  | 0.2250582 | 0.5906504 | 0.5295487 | 1 | CSF1R                                          |
| Cellular Component | GO:0031312 | extrinsic component of organelle membrane | 8/2341 | 49/19559 | 0.2271973 | 0.5949185 | 0.5333753 | 8 | ULK1/VAC14/PAM16/ATG14/WDR81/COQ4/TEPSIN/COQ8B |
| Cellular Component | GO:0000800 | lateral element                           | 3/2341 | 14/19559 | 0.2302796 | 0.5962597 | 0.5345777 | 3 | BLM/BRCA2/RAD21L1                              |

|                    |            |                                                     |         |           |           |           |           |    |                                                                                                                                             |
|--------------------|------------|-----------------------------------------------------|---------|-----------|-----------|-----------|-----------|----|---------------------------------------------------------------------------------------------------------------------------------------------|
| Cellular Component | GO:0031314 | extrinsic component of mitochondrial inner membrane | 3/2341  | 14/19559  | 0.2302796 | 0.5962597 | 0.5345777 | 3  | PAM16/COQ4/COQ8B                                                                                                                            |
| Cellular Component | GO:0033643 | host cell part                                      | 3/2341  | 14/19559  | 0.2302796 | 0.5962597 | 0.5345777 | 3  | AQP1/PI4KA/SHFL                                                                                                                             |
| Cellular Component | GO:0034518 | RNA cap binding complex                             | 3/2341  | 14/19559  | 0.2302796 | 0.5962597 | 0.5345777 | 3  | AGO2/CYFIP1/NCBP3                                                                                                                           |
| Cellular Component | GO:0036020 | endolysosome membrane                               | 3/2341  | 14/19559  | 0.2302796 | 0.5962597 | 0.5345777 | 3  | AP2A1/TLR9/CLEC16A                                                                                                                          |
| Cellular Component | GO:0099738 | cell cortex region                                  | 7/2341  | 42/19559  | 0.231974  | 0.5993092 | 0.5373117 | 7  | CTSZ/PRKCZ/DCTN1/ENO1/CTBP1/CTBP2/NUMA1                                                                                                     |
| Cellular Component | GO:0031904 | endosome lumen                                      | 6/2341  | 35/19559  | 0.2360051 | 0.60805   | 0.5451483 | 6  | LNPEP/AP4S1/CTSH/APP/CTSB/PDLIM4                                                                                                            |
| Cellular Component | GO:1904115 | axon cytoplasm                                      | 9/2341  | 57/19559  | 0.2378199 | 0.60805   | 0.5451483 | 9  | SPG7/DYNC1H1/KIF5C/KIF1B/MAP1A/AP3D1/FBXW11/NDEL1/DTNBP1                                                                                    |
| Cellular Component | GO:0032806 | carboxy-terminal domain protein kinase complex      | 4/2341  | 21/19559  | 0.2380289 | 0.60805   | 0.5451483 | 4  | CCNH/RB1/ERCC2/CDK13                                                                                                                        |
| Cellular Component | GO:0000781 | chromosome, telomeric region                        | 23/2341 | 164/19559 | 0.2390722 | 0.60805   | 0.5451483 | 23 | BLM/TNKS/BRCA2/HMBOX1/RTEL1/NSMCE2/MCM5/WRNIP1/WDR82/MCM2/SMG6/PPP1CB/DMC1/TP53BP1/SP100/CHEK2/ERCC1/SLX4/DYDC2/DYDC1/TFIP11/TERB2/MACROH2A |

|                    |            |                                                             |         |           |           |         |           |    |                                                                                                                                                                              |
|--------------------|------------|-------------------------------------------------------------|---------|-----------|-----------|---------|-----------|----|------------------------------------------------------------------------------------------------------------------------------------------------------------------------------|
| Cellular Component | GO:0044306 | neuron projection terminus                                  | 21/2341 | 149/19559 | 0.2442259 | 0.60805 | 0.5451483 | 21 | KCNAB2/VTI1A/AAK1/SLC8A1/MICAL1/TANC1/PNOC/ITSN1/GIT1/BAIAP2/ILK/PTPRN2/CRHBP/PRKCB/ACTG1/CHRM2/RGS10/AP3D1/CYFIP1/RNF40/CABP4                                               |
| Cellular Component | GO:0000775 | chromosome, centromeric region                              | 27/2341 | 196/19559 | 0.2458468 | 0.60805 | 0.5451483 | 27 | DCTN1/BAZ1B/MAD1L1/NDE1/KANSL1/CHAMP1/MIS12/UVRAG/ZNF276/DCTN2/PPP2R5C/STAG1/KDM4C/SEC13/PPP2R1A/RAD21L1/DNMT1/TP53BP1/CDC45/CEBPB/CENPM/SPAG5/ZNF330/FBXW11/NDEL1/KAT7/PEL1 |
| Cellular Component | GO:0000839 | Hrd1p ubiquitin ligase ERAD-L complex                       | 2/2341  | 8/19559   | 0.2470541 | 0.60805 | 0.5451483 | 2  | RHBDD2/DERL2                                                                                                                                                                 |
| Cellular Component | GO:0008024 | cyclin/CDK positive transcription elongation factor complex | 2/2341  | 8/19559   | 0.2470541 | 0.60805 | 0.5451483 | 2  | RB1/CDK13                                                                                                                                                                    |
| Cellular Component | GO:0008290 | F-actin capping protein complex                             | 2/2341  | 8/19559   | 0.2470541 | 0.60805 | 0.5451483 | 2  | CAPG/ADD1                                                                                                                                                                    |
| Cellular Component | GO:0017059 | serine C-palmitoyltransferase complex                       | 2/2341  | 8/19559   | 0.2470541 | 0.60805 | 0.5451483 | 2  | SPTLC2/ORMDL3                                                                                                                                                                |
| Cellular Component | GO:0031211 | endoplasmic reticulum palmitoyltransferase complex          | 2/2341  | 8/19559   | 0.2470541 | 0.60805 | 0.5451483 | 2  | SPTLC2/ORMDL3                                                                                                                                                                |
| Cellular Component | GO:0032584 | growth cone membrane                                        | 2/2341  | 8/19559   | 0.2470541 | 0.60805 | 0.5451483 | 2  | TRPV2/NECTIN1                                                                                                                                                                |
| Cellular Component | GO:0033010 | paranodal junction                                          | 2/2341  | 8/19559   | 0.2470541 | 0.60805 | 0.5451483 | 2  | JAM3/CNTNAP1                                                                                                                                                                 |

|                    |            |                                                 |        |         |           |         |           |   |                 |
|--------------------|------------|-------------------------------------------------|--------|---------|-----------|---------|-----------|---|-----------------|
| Cellular Component | GO:0036449 | microtubule minus-end                           | 2/2341 | 8/19559 | 0.2470541 | 0.60805 | 0.5451483 | 2 | SVIL/NUMA1      |
| Cellular Component | GO:0036513 | Derlin-1 retrotranslocation complex             | 2/2341 | 8/19559 | 0.2470541 | 0.60805 | 0.5451483 | 2 | AMFR/HM13       |
| Cellular Component | GO:0070531 | BRCA1-A complex                                 | 2/2341 | 8/19559 | 0.2470541 | 0.60805 | 0.5451483 | 2 | ABRAXAS1/BABAM2 |
| Cellular Component | GO:0070776 | MOZ/MORF histone acetyltransferase complex      | 2/2341 | 8/19559 | 0.2470541 | 0.60805 | 0.5451483 | 2 | BRD1/ING5       |
| Cellular Component | GO:0071144 | heteromeric SMAD protein complex                | 2/2341 | 8/19559 | 0.2470541 | 0.60805 | 0.5451483 | 2 | SMAD3/SMAD7     |
| Cellular Component | GO:0071439 | clathrin complex                                | 2/2341 | 8/19559 | 0.2470541 | 0.60805 | 0.5451483 | 2 | BAIAP2L2/CLTCL1 |
| Cellular Component | GO:0097413 | Lewy body                                       | 2/2341 | 8/19559 | 0.2470541 | 0.60805 | 0.5451483 | 2 | FBXO7/PRKN      |
| Cellular Component | GO:0098837 | postsynaptic recycling endosome                 | 2/2341 | 8/19559 | 0.2470541 | 0.60805 | 0.5451483 | 2 | ZDHHC2/AKAP5    |
| Cellular Component | GO:1905961 | protein-cysteine S-palmitoyltransferase complex | 2/2341 | 8/19559 | 0.2470541 | 0.60805 | 0.5451483 | 2 | SPTLC2/ORMDL3   |

|                    |            |                                                    |         |           |           |           |           |    |                                                                                                                                                                                                                                                      |
|--------------------|------------|----------------------------------------------------|---------|-----------|-----------|-----------|-----------|----|------------------------------------------------------------------------------------------------------------------------------------------------------------------------------------------------------------------------------------------------------|
| Cellular Component | GO:0000794 | condensed nuclear chromosome                       | 15/2341 | 103/19559 | 0.2474134 | 0.60805   | 0.5451483 | 15 | BLM/BRD4/TTN/BRCA2/HUS1/RCC1/MIS12/RGS12/RNF212/RAD21L1/DMC1/KIFAP3/TEX12/NOL6/PEL1                                                                                                                                                                  |
| Cellular Component | GO:0000152 | nuclear ubiquitin ligase complex                   | 7/2341  | 43/19559  | 0.2507393 | 0.6127345 | 0.5493482 | 7  | FZR1/PHC2/CDC16/PHC3/PCGF3/ANAPC7/BABAM2                                                                                                                                                                                                             |
| Cellular Component | GO:0000307 | cyclin-dependent protein kinase holoenzyme complex | 7/2341  | 43/19559  | 0.2507393 | 0.6127345 | 0.5493482 | 7  | CDK14/CCNH/CCNA1/RB1/CCNY/CDK13/CCNP                                                                                                                                                                                                                 |
| Cellular Component | GO:0000932 | P-body                                             | 13/2341 | 88/19559  | 0.2509042 | 0.6127345 | 0.5493482 | 13 | LSM1/SYNE1/TNRC6B/AGO1/ZC3H12D/SAMD4A/LIMD1/AGO2/EDC3/TRIM5/RBPMS/DIS3L2/SHFL                                                                                                                                                                        |
| Cellular Component | GO:0031965 | nuclear membrane                                   | 40/2341 | 301/19559 | 0.2626989 | 0.631644  | 0.5663015 | 40 | TRIM27/FZR1/SLC16A3/ITPRIP/TNKS/SYNE1/ERN1/SMAD3/RCC1/ITPR1/NAV3/ACKR2/EPC1/PRICKLE2/NOS1AP/OSBPL6/LMNB2/CPNE1/AQP1/GRK5/NUP93/NRXN1/ATP2A3/PLCB1/TEX2/SORT1/MFSD10/BCL2/P2RX1/TOR1B/BCL2L1/MX1/TNRC18/PLRG1/P2RX5/LPIN1/RAP1GAP2/TERB2/TEPSIN/MYORG |
| Cellular Component | GO:0000153 | cytoplasmic ubiquitin ligase complex               | 3/2341  | 15/19559  | 0.2640821 | 0.631644  | 0.5663015 | 3  | RHBDD2/DERL2/MARCHF6                                                                                                                                                                                                                                 |
| Cellular Component | GO:0005662 | DNA replication factor A complex                   | 3/2341  | 15/19559  | 0.2640821 | 0.631644  | 0.5663015 | 3  | SMARCAL1/PLRG1/XPA                                                                                                                                                                                                                                   |
| Cellular Component | GO:0012510 | trans-Golgi network transport vesicle membrane     | 3/2341  | 15/19559  | 0.2640821 | 0.631644  | 0.5663015 | 3  | AP2A1/AP1G2/CLTCL1                                                                                                                                                                                                                                   |
| Cellular Component | GO:0030688 | preribosome, small subunit precursor               | 3/2341  | 15/19559  | 0.2640821 | 0.631644  | 0.5663015 | 3  | NOB1/NOP14/RIOK1                                                                                                                                                                                                                                     |

|                    |            |                                                        |         |           |           |           |           |    |                                                                                                                                                       |
|--------------------|------------|--------------------------------------------------------|---------|-----------|-----------|-----------|-----------|----|-------------------------------------------------------------------------------------------------------------------------------------------------------|
| Cellular Component | GO:0035102 | PRC1 complex                                           | 3/2341  | 15/19559  | 0.2640821 | 0.631644  | 0.5663015 | 3  | PHC2/PHC3/PCGF3                                                                                                                                       |
| Cellular Component | GO:0071565 | nBAF complex                                           | 3/2341  | 15/19559  | 0.2640821 | 0.631644  | 0.5663015 | 3  | SMARCA2/ARID1B/SMARCD1                                                                                                                                |
| Cellular Component | GO:0099059 | integral component of presynaptic active zone membrane | 3/2341  | 15/19559  | 0.2640821 | 0.631644  | 0.5663015 | 3  | NRXN1/P2RX1/NECTIN1                                                                                                                                   |
| Cellular Component | GO:0001750 | photoreceptor outer segment                            | 13/2341 | 89/19559  | 0.2640925 | 0.631644  | 0.5663015 | 13 | RCVRN/PDE6A/RAB27A/CCDC66/GNAT2/MYO5A/GNA11/PDE6H/IFT140/CDHR1/SHANK2/GRK7/EYS                                                                        |
| Cellular Component | GO:1902554 | serine/threonine protein kinase complex                | 13/2341 | 89/19559  | 0.2640925 | 0.631644  | 0.5663015 | 13 | ULK1/ERN1/ERC1/CDK14/UVRAG/CAB39/CCNH/CCNA1/RB1/CCNY/ERCC2/CDK13/CCNP                                                                                 |
| Cellular Component | GO:0032982 | myosin filament                                        | 4/2341  | 22/19559  | 0.2655507 | 0.6325231 | 0.5670897 | 4  | MYH11/MYH15/MYH9/MYOM1                                                                                                                                |
| Cellular Component | GO:0097038 | perinuclear endoplasmic reticulum                      | 4/2341  | 22/19559  | 0.2655507 | 0.6325231 | 0.5670897 | 4  | PIK3R1/OSBPL6/CLU/CREB3L2                                                                                                                             |
| Cellular Component | GO:0030662 | coated vesicle membrane                                | 25/2341 | 183/19559 | 0.2700992 | 0.641585  | 0.5752141 | 25 | AP2A1/TGFA/STX5/CD9/VTI1A/DENND1A/SEC23B/HLA-C/HLA-F/AP1B1/EPN2/CNIH2/CD59/SEC13/CHRM2/SEC24C/AP1G2/EPS15/TMED2/SREBF1/EPN3/CLTCL1/SEC31A/DBNL/TEPSIN |
| Cellular Component | GO:0045334 | clathrin-coated endocytic vesicle                      | 9/2341  | 59/19559  | 0.2704613 | 0.641585  | 0.5752141 | 9  | CPNE6/AP2A1/CD9/DNM2/SFTPD/EPN2/EPS15/INPP5F/CLTCL1                                                                                                   |

|                    |            |                                   |         |           |           |           |           |    |                                                                                                |
|--------------------|------------|-----------------------------------|---------|-----------|-----------|-----------|-----------|----|------------------------------------------------------------------------------------------------|
| Cellular Component | GO:0044853 | plasma membrane raft              | 16/2341 | 113/19559 | 0.2747969 | 0.6480033 | 0.5809685 | 16 | PRTN3/CD177/FXYD1/PACSIN2/TGFBR2/NOS1AP/MLC1/ITGB2/CDH1/ADD1/CORO1C/F2R/SLC2A1/ADTRP/EZR/FLOT1 |
| Cellular Component | GO:0031672 | A band                            | 6/2341  | 37/19559  | 0.2781653 | 0.6480033 | 0.5809685 | 6  | HDAC4/ENO1/MYOM1/FHL2/ANK2/MYL7                                                                |
| Cellular Component | GO:0005782 | peroxisomal matrix                | 8/2341  | 52/19559  | 0.2797209 | 0.6480033 | 0.5809685 | 8  | FAR2/AMACR/ACOXL/AGXT/CAT/ACOX2/HMGCL/CRYM                                                     |
| Cellular Component | GO:0031907 | microbody lumen                   | 8/2341  | 52/19559  | 0.2797209 | 0.6480033 | 0.5809685 | 8  | FAR2/AMACR/ACOXL/AGXT/CAT/ACOX2/HMGCL/CRYM                                                     |
| Cellular Component | GO:0000123 | histone acetyltransferase complex | 12/2341 | 83/19559  | 0.287393  | 0.6480033 | 0.5809685 | 12 | KANSL1/BRD1/EPC1/TAF10/KANSL2/ENY2/CREBBP/UBAP2L/RUVBL1/KAT7/ING5/POLE4                        |
| Cellular Component | GO:0035371 | microtubule plus-end              | 4/2341  | 23/19559  | 0.2936061 | 0.6480033 | 0.5809685 | 4  | DCTN1/MYO5A/NUMA1/SPAG5                                                                        |
| Cellular Component | GO:0000138 | Golgi trans cisterna              | 2/2341  | 9/19559   | 0.2940149 | 0.6480033 | 0.5809685 | 2  | SGMS1/YIPF1                                                                                    |
| Cellular Component | GO:0000836 | Hrd1p ubiquitin ligase complex    | 2/2341  | 9/19559   | 0.2940149 | 0.6480033 | 0.5809685 | 2  | RHBDD2/DERL2                                                                                   |
| Cellular Component | GO:0005883 | neurofilament                     | 2/2341  | 9/19559   | 0.2940149 | 0.6480033 | 0.5809685 | 2  | NEFM/SHANK2                                                                                    |

|                    |            |                                               |        |         |           |           |           |   |                   |
|--------------------|------------|-----------------------------------------------|--------|---------|-----------|-----------|-----------|---|-------------------|
| Cellular Component | GO:0030123 | AP-3 adaptor complex                          | 2/2341 | 9/19559 | 0.2940149 | 0.6480033 | 0.5809685 | 2 | VPS18/AP3D1       |
| Cellular Component | GO:0031264 | death-inducing signaling complex              | 2/2341 | 9/19559 | 0.2940149 | 0.6480033 | 0.5809685 | 2 | RIPK1/FADD        |
| Cellular Component | GO:0031371 | ubiquitin conjugating enzyme complex          | 2/2341 | 9/19559 | 0.2940149 | 0.6480033 | 0.5809685 | 2 | UBE2V1/RNF40      |
| Cellular Component | GO:0032059 | bleb                                          | 2/2341 | 9/19559 | 0.2940149 | 0.6480033 | 0.5809685 | 2 | FMNL1/PTPRC       |
| Cellular Component | GO:0033180 | proton-transporting V-type ATPase, V1 domain  | 2/2341 | 9/19559 | 0.2940149 | 0.6480033 | 0.5809685 | 2 | ATP6V1B2/ATP6V1C1 |
| Cellular Component | GO:0033647 | host intracellular organelle                  | 2/2341 | 9/19559 | 0.2940149 | 0.6480033 | 0.5809685 | 2 | PI4KA/SHFL        |
| Cellular Component | GO:0033648 | host intracellular membrane-bounded organelle | 2/2341 | 9/19559 | 0.2940149 | 0.6480033 | 0.5809685 | 2 | PI4KA/SHFL        |
| Cellular Component | GO:0042612 | MHC class I protein complex                   | 2/2341 | 9/19559 | 0.2940149 | 0.6480033 | 0.5809685 | 2 | HLA-C/HLA-F       |
| Cellular Component | GO:0070578 | RISC-loading complex                          | 2/2341 | 9/19559 | 0.2940149 | 0.6480033 | 0.5809685 | 2 | AGO1/AGO2         |



|                    |            |                                    |         |           |           |           |           |    |  |                                                                                                                         |
|--------------------|------------|------------------------------------|---------|-----------|-----------|-----------|-----------|----|--|-------------------------------------------------------------------------------------------------------------------------|
| Cellular Component | GO:0071141 | SMAD protein complex               | 2/2341  | 9/19559   | 0.2940149 | 0.6480033 | 0.5809685 | 2  |  | SMAD3/SMAD7                                                                                                             |
| Cellular Component | GO:0072559 | NLRP3 inflammasome complex         | 2/2341  | 9/19559   | 0.2940149 | 0.6480033 | 0.5809685 | 2  |  | NLRP3/CASP1                                                                                                             |
| Cellular Component | GO:0097224 | sperm connecting piece             | 2/2341  | 9/19559   | 0.2940149 | 0.6480033 | 0.5809685 | 2  |  | DNAJB13/PMFBP1                                                                                                          |
| Cellular Component | GO:0097648 | G protein-coupled receptor complex | 2/2341  | 9/19559   | 0.2940149 | 0.6480033 | 0.5809685 | 2  |  | GABBR1/GABBR2                                                                                                           |
| Cellular Component | GO:0048786 | presynaptic active zone            | 11/2341 | 76/19559  | 0.2979583 | 0.6480033 | 0.5809685 | 11 |  | APP/EGFLAM/PPFIA1/CTBP1/NRXN1/CTBP2/PPFIBP2/P2RX1/CNTNAP1/FLOT1/NECTIN1                                                 |
| Cellular Component | GO:0030132 | clathrin coat of coated pit        | 3/2341  | 16/19559  | 0.2984191 | 0.6480033 | 0.5809685 | 3  |  | AP2A1/EPS15L1/EPS15                                                                                                     |
| Cellular Component | GO:0034045 | phagophore assembly site membrane  | 3/2341  | 16/19559  | 0.2984191 | 0.6480033 | 0.5809685 | 3  |  | ULK1/WIPI2/ATG14                                                                                                        |
| Cellular Component | GO:0070822 | Sin3-type complex                  | 3/2341  | 16/19559  | 0.2984191 | 0.6480033 | 0.5809685 | 3  |  | SIN3B/HDAC1/PHF12                                                                                                       |
| Cellular Component | GO:0097731 | 9+0 non-motile cilium              | 19/2341 | 139/19559 | 0.3038538 | 0.6480033 | 0.5809685 | 19 |  | RCVRN/PDE6A/RAB27A/CCDC66/GNAT2/MYO5A/GNA11/PDE6H/TTL4/IFT140/SDCCAG8/RPGRIP1/CDHR1/SHANK2/GRK7/KIFAP3/EYS/NPFFR1/PRLHR |

|                    |            |                                                       |         |          |           |           |           |    |                                                                                |
|--------------------|------------|-------------------------------------------------------|---------|----------|-----------|-----------|-----------|----|--------------------------------------------------------------------------------|
| Cellular Component | GO:0005643 | nuclear pore                                          | 12/2341 | 85/19559 | 0.3164303 | 0.6480033 | 0.5809685 | 12 | NXF1/MAD1L1/TNKS/RAE1/XPO7/ENY2/BICD2/NUP93/SEC13/SNUPN/MYO1C/PCID2            |
| Cellular Component | GO:0055038 | recycling endosome membrane                           | 12/2341 | 85/19559 | 0.3164303 | 0.6480033 | 0.5809685 | 12 | EHD1/SORL1/SORCS2/NDRG1/PACSIN2/HLA-C/INPP4A/ZDHHC2/HLA-F/NTRK1/MICALL1/PDLIM4 |
| Cellular Component | GO:0000126 | transcription factor TFIIB complex                    | 1/2341  | 3/19559  | 0.3178198 | 0.6480033 | 0.5809685 | 1  | BRF1                                                                           |
| Cellular Component | GO:0000221 | vacuolar proton-transporting V-type ATPase, V1 domain | 1/2341  | 3/19559  | 0.3178198 | 0.6480033 | 0.5809685 | 1  | ATP6V1C1                                                                       |
| Cellular Component | GO:0000818 | nuclear MIS12/MIND complex                            | 1/2341  | 3/19559  | 0.3178198 | 0.6480033 | 0.5809685 | 1  | MIS12                                                                          |
| Cellular Component | GO:0001536 | radial spoke stalk                                    | 1/2341  | 3/19559  | 0.3178198 | 0.6480033 | 0.5809685 | 1  | CFAP61                                                                         |
| Cellular Component | GO:0005610 | laminin-5 complex                                     | 1/2341  | 3/19559  | 0.3178198 | 0.6480033 | 0.5809685 | 1  | LAMB3                                                                          |
| Cellular Component | GO:0005863 | striated muscle myosin thick filament                 | 1/2341  | 3/19559  | 0.3178198 | 0.6480033 | 0.5809685 | 1  | MYOM1                                                                          |
| Cellular Component | GO:0005896 | interleukin-6 receptor complex                        | 1/2341  | 3/19559  | 0.3178198 | 0.6480033 | 0.5809685 | 1  | IL6R                                                                           |

|                    |            |                                                                      |        |         |           |           |           |   |        |
|--------------------|------------|----------------------------------------------------------------------|--------|---------|-----------|-----------|-----------|---|--------|
| Cellular Component | GO:0005943 | phosphatidylinositol 3-kinase complex, class IA                      | 1/2341 | 3/19559 | 0.3178198 | 0.6480033 | 0.5809685 | 1 | PIK3R1 |
| Cellular Component | GO:0016939 | kinesin II complex                                                   | 1/2341 | 3/19559 | 0.3178198 | 0.6480033 | 0.5809685 | 1 | KIFAP3 |
| Cellular Component | GO:0019907 | cyclin-dependent protein kinase activating kinase holoenzyme complex | 1/2341 | 3/19559 | 0.3178198 | 0.6480033 | 0.5809685 | 1 | CCNH   |
| Cellular Component | GO:0020003 | symbiont-containing vacuole                                          | 1/2341 | 3/19559 | 0.3178198 | 0.6480033 | 0.5809685 | 1 | AQP1   |
| Cellular Component | GO:0020016 | ciliary pocket                                                       | 1/2341 | 3/19559 | 0.3178198 | 0.6480033 | 0.5809685 | 1 | EHD1   |
| Cellular Component | GO:0020018 | ciliary pocket membrane                                              | 1/2341 | 3/19559 | 0.3178198 | 0.6480033 | 0.5809685 | 1 | EHD1   |
| Cellular Component | GO:0030689 | Noc complex                                                          | 1/2341 | 3/19559 | 0.3178198 | 0.6480033 | 0.5809685 | 1 | NOP14  |
| Cellular Component | GO:0030956 | glutamyl-tRNA(Gln) amidotransferase complex                          | 1/2341 | 3/19559 | 0.3178198 | 0.6480033 | 0.5809685 | 1 | GATB   |
| Cellular Component | GO:0030981 | cortical microtubule cytoskeleton                                    | 1/2341 | 3/19559 | 0.3178198 | 0.6480033 | 0.5809685 | 1 | NUMA1  |

|                    |            |                                   |        |         |           |           |           |   |         |
|--------------------|------------|-----------------------------------|--------|---------|-----------|-----------|-----------|---|---------|
| Cellular Component | GO:0031084 | BLOC-2 complex                    | 1/2341 | 3/19559 | 0.3178198 | 0.6480033 | 0.5809685 | 1 | HPS6    |
| Cellular Component | GO:0032545 | CURI complex                      | 1/2341 | 3/19559 | 0.3178198 | 0.6480033 | 0.5809685 | 1 | NOL6    |
| Cellular Component | GO:0033150 | cytoskeletal calyx                | 1/2341 | 3/19559 | 0.3178198 | 0.6480033 | 0.5809685 | 1 | CCIN    |
| Cellular Component | GO:0033186 | CAF-1 complex                     | 1/2341 | 3/19559 | 0.3178198 | 0.6480033 | 0.5809685 | 1 | CHAF1A  |
| Cellular Component | GO:0033557 | Slx1-Slx4 complex                 | 1/2341 | 3/19559 | 0.3178198 | 0.6480033 | 0.5809685 | 1 | SLX4    |
| Cellular Component | GO:0034455 | t-UTP complex                     | 1/2341 | 3/19559 | 0.3178198 | 0.6480033 | 0.5809685 | 1 | UTP4    |
| Cellular Component | GO:0034456 | UTP-C complex                     | 1/2341 | 3/19559 | 0.3178198 | 0.6480033 | 0.5809685 | 1 | NOL6    |
| Cellular Component | GO:0034751 | aryl hydrocarbon receptor complex | 1/2341 | 3/19559 | 0.3178198 | 0.6480033 | 0.5809685 | 1 | AIP     |
| Cellular Component | GO:0034990 | nuclear mitotic cohesin complex   | 1/2341 | 3/19559 | 0.3178198 | 0.6480033 | 0.5809685 | 1 | RAD21L1 |

|                    |            |                                              |        |         |           |           |           |   |        |
|--------------------|------------|----------------------------------------------|--------|---------|-----------|-----------|-----------|---|--------|
| Cellular Component | GO:0035060 | brahma complex                               | 1/2341 | 3/19559 | 0.3178198 | 0.6480033 | 0.5809685 | 1 | ARID1B |
| Cellular Component | GO:0035838 | growing cell tip                             | 1/2341 | 3/19559 | 0.3178198 | 0.6480033 | 0.5809685 | 1 | PI4K2A |
| Cellular Component | GO:0035868 | alphav-beta3 integrin-HMGB1 complex          | 1/2341 | 3/19559 | 0.3178198 | 0.6480033 | 0.5809685 | 1 | ITGB3  |
| Cellular Component | GO:0043564 | Ku70:Ku80 complex                            | 1/2341 | 3/19559 | 0.3178198 | 0.6480033 | 0.5809685 | 1 | PAXX   |
| Cellular Component | GO:0044307 | dendritic branch                             | 1/2341 | 3/19559 | 0.3178198 | 0.6480033 | 0.5809685 | 1 | MAP1A  |
| Cellular Component | GO:0070110 | ciliary neurotrophic factor receptor complex | 1/2341 | 3/19559 | 0.3178198 | 0.6480033 | 0.5809685 | 1 | IL6R   |
| Cellular Component | GO:0070209 | ASTRA complex                                | 1/2341 | 3/19559 | 0.3178198 | 0.6480033 | 0.5809685 | 1 | TTI1   |
| Cellular Component | GO:0070369 | beta-catenin-TCF7L2 complex                  | 1/2341 | 3/19559 | 0.3178198 | 0.6480033 | 0.5809685 | 1 | TCF7L2 |
| Cellular Component | GO:0070939 | Dsl1/NZR complex                             | 1/2341 | 3/19559 | 0.3178198 | 0.6480033 | 0.5809685 | 1 | NBAS   |

|                    |            |                                                |        |         |           |           |           |   |        |
|--------------------|------------|------------------------------------------------|--------|---------|-----------|-----------|-----------|---|--------|
| Cellular Component | GO:0070985 | transcription factor TFIIK complex             | 1/2341 | 3/19559 | 0.3178198 | 0.6480033 | 0.5809685 | 1 | CCNH   |
| Cellular Component | GO:0071008 | U2-type post-mRNA release spliceosomal complex | 1/2341 | 3/19559 | 0.3178198 | 0.6480033 | 0.5809685 | 1 | TFIP11 |
| Cellular Component | GO:0071062 | alphav-beta3 integrin-vitronectin complex      | 1/2341 | 3/19559 | 0.3178198 | 0.6480033 | 0.5809685 | 1 | ITGB3  |
| Cellular Component | GO:0072563 | endothelial microparticle                      | 1/2341 | 3/19559 | 0.3178198 | 0.6480033 | 0.5809685 | 1 | ENG    |
| Cellular Component | GO:0090443 | FAR/SIN/STRIPAK complex                        | 1/2341 | 3/19559 | 0.3178198 | 0.6480033 | 0.5809685 | 1 | STRN4  |
| Cellular Component | GO:0097356 | perinucleolar compartment                      | 1/2341 | 3/19559 | 0.3178198 | 0.6480033 | 0.5809685 | 1 | SORL1  |
| Cellular Component | GO:0097454 | Schwann cell microvillus                       | 1/2341 | 3/19559 | 0.3178198 | 0.6480033 | 0.5809685 | 1 | EZR    |
| Cellular Component | GO:0097513 | myosin II filament                             | 1/2341 | 3/19559 | 0.3178198 | 0.6480033 | 0.5809685 | 1 | MYH9   |
| Cellular Component | GO:0098559 | cytoplasmic side of early endosome membrane    | 1/2341 | 3/19559 | 0.3178198 | 0.6480033 | 0.5809685 | 1 | LITAF  |

|                    |            |                                             |         |          |           |           |           |    |                                                                                   |
|--------------------|------------|---------------------------------------------|---------|----------|-----------|-----------|-----------|----|-----------------------------------------------------------------------------------|
| Cellular Component | GO:0099617 | matrix side of mitochondrial inner membrane | 1/2341  | 3/19559  | 0.3178198 | 0.6480033 | 0.5809685 | 1  | BDH1                                                                              |
| Cellular Component | GO:1901588 | dendritic microtubule                       | 1/2341  | 3/19559  | 0.3178198 | 0.6480033 | 0.5809685 | 1  | MAP1A                                                                             |
| Cellular Component | GO:1902636 | kinociliary basal body                      | 1/2341  | 3/19559  | 0.3178198 | 0.6480033 | 0.5809685 | 1  | CDC14A                                                                            |
| Cellular Component | GO:1902937 | inward rectifier potassium channel complex  | 1/2341  | 3/19559  | 0.3178198 | 0.6480033 | 0.5809685 | 1  | NOS1AP                                                                            |
| Cellular Component | GO:1990037 | Lewy body core                              | 1/2341  | 3/19559  | 0.3178198 | 0.6480033 | 0.5809685 | 1  | FBXO7                                                                             |
| Cellular Component | GO:1990452 | Parkin-FBXW7-Cul1 ubiquitin ligase complex  | 1/2341  | 3/19559  | 0.3178198 | 0.6480033 | 0.5809685 | 1  | PRKN                                                                              |
| Cellular Component | GO:1990761 | growth cone lamellipodium                   | 1/2341  | 3/19559  | 0.3178198 | 0.6480033 | 0.5809685 | 1  | APP                                                                               |
| Cellular Component | GO:0005811 | lipid droplet                               | 13/2341 | 93/19559 | 0.318974  | 0.6480033 | 0.5809685 | 13 | PNPLA2/EHD1/TMEM159/LPCAT1/RAP1B/RAB5C/PITPNM1/RDH10/AIFM2/ABHD5/GOS2/BSCL2/SPART |
| Cellular Component | GO:0031248 | protein acetyltransferase complex           | 13/2341 | 93/19559 | 0.318974  | 0.6480033 | 0.5809685 | 13 | KANSL1/BRD1/EPC1/TAF10/KANSL2/ENY2/CREBBP/UBAP2L/NAA16/RUVBL1/KAT7/ING5/POLE4     |

|                    |            |                                                    |         |           |           |           |           |    |                                                                                                                                                                                                                     |
|--------------------|------------|----------------------------------------------------|---------|-----------|-----------|-----------|-----------|----|---------------------------------------------------------------------------------------------------------------------------------------------------------------------------------------------------------------------|
| Cellular Component | GO:1902493 | acetyltransferase complex                          | 13/2341 | 93/19559  | 0.318974  | 0.6480033 | 0.5809685 | 13 | KANSL1/BRD1/EPC1/TAF10/KANSL2/ENY2/CREBBP/UBAP2L/NAA16/RUVBL1/KAT7/ING5/POLE4                                                                                                                                       |
| Cellular Component | GO:0044305 | calyx of Held                                      | 4/2341  | 24/19559  | 0.3220102 | 0.6530277 | 0.5854731 | 4  | ITSN1/GIT1/PRKCB/ACTG1                                                                                                                                                                                              |
| Cellular Component | GO:0097733 | photoreceptor cell cilium                          | 16/2341 | 117/19559 | 0.3240266 | 0.6559701 | 0.5881111 | 16 | RCVRN/PDE6A/RAB27A/CCDC66/GNAT2/MYO5A/GNA11/PDE6H/IFT140/SDCCAG8/RPGRIP1/CDHR1/SHANK2/GRK7/KIFAP3/EYS                                                                                                               |
| Cellular Component | GO:0005852 | eukaryotic translation initiation factor 3 complex | 3/2341  | 17/19559  | 0.3329668 | 0.6717243 | 0.6022355 | 3  | EIF3M/COP55/EIF3H                                                                                                                                                                                                   |
| Cellular Component | GO:0043083 | synaptic cleft                                     | 3/2341  | 17/19559  | 0.3329668 | 0.6717243 | 0.6022355 | 3  | COLQ/EGFLAM/DNM3                                                                                                                                                                                                    |
| Cellular Component | GO:0099568 | cytoplasmic region                                 | 33/2341 | 254/19559 | 0.3342312 | 0.6729287 | 0.6033154 | 33 | CTSZ/PRKCZ/DCTN1/ENO1/DNAH3/SPG7/DYNC1H1/SPAG6/DNAJB13/BAIAP2/CTBP1/CTBP2/ATG14/CCIN/KIF5C/NUMA1/IFT140/INPP5E/ITGB2/KIF1B/RPGRIP1/MAP1A/KIFAP3/AP3D1/DNAI2/FBXW11/NDEL1/DTNBP1/SPEF1/SEPTIN9/CFAP221/CFAP61/CFAP46 |
| Cellular Component | GO:0000407 | phagophore assembly site                           | 5/2341  | 32/19559  | 0.335499  | 0.6729287 | 0.6033154 | 5  | ULK1/WIPI2/ATG14/VMP1/ILRUN                                                                                                                                                                                         |
| Cellular Component | GO:0000793 | condensed chromosome                               | 29/2341 | 222/19559 | 0.3362986 | 0.6729287 | 0.6033154 | 29 | BLM/BRD4/BAZ1B/MAD1L1/TTN/NDE1/BRCA2/KANSL1/HUS1/NSMCE2/RCC1/CHAMP1/MIS12/ZNF276/RGS12/RNF212/STAG1/ESRRB/RAD21L1/DMC1/TP53BP1/KIFAP3/CEBPB/CENPM/SPAG5/TEX12/NOL6/NDEL1/PELI1                                      |
| Cellular Component | GO:0005641 | nuclear envelope lumen                             | 2/2341  | 10/19559  | 0.3405251 | 0.6729287 | 0.6033154 | 2  | SORL1/APP                                                                                                                                                                                                           |



|                    |            |                                              |         |          |           |           |           |    |                                                             |
|--------------------|------------|----------------------------------------------|---------|----------|-----------|-----------|-----------|----|-------------------------------------------------------------|
| Cellular Component | GO:0005916 | fascia adherens                              | 2/2341  | 10/19559 | 0.3405251 | 0.6729287 | 0.6033154 | 2  | JUP/ACTN1                                                   |
| Cellular Component | GO:0031209 | SCAR complex                                 | 2/2341  | 10/19559 | 0.3405251 | 0.6729287 | 0.6033154 | 2  | NCKAP1/CYFIP1                                               |
| Cellular Component | GO:0033179 | proton-transporting V-type ATPase, VO domain | 2/2341  | 10/19559 | 0.3405251 | 0.6729287 | 0.6033154 | 2  | ATP6V0B/ATP6V0C                                             |
| Cellular Component | GO:0044224 | juxtaparanode region of axon                 | 2/2341  | 10/19559 | 0.3405251 | 0.6729287 | 0.6033154 | 2  | KCNAB2/EPB41L3                                              |
| Cellular Component | GO:0045240 | dihydropyridyl dehydrogenase complex         | 2/2341  | 10/19559 | 0.3405251 | 0.6729287 | 0.6033154 | 2  | OGDH/BCKDHA                                                 |
| Cellular Component | GO:0070938 | contractile ring                             | 2/2341  | 10/19559 | 0.3405251 | 0.6729287 | 0.6033154 | 2  | MAEA/MYH9                                                   |
| Cellular Component | GO:0072546 | ER membrane protein complex                  | 2/2341  | 10/19559 | 0.3405251 | 0.6729287 | 0.6033154 | 2  | EMC8/EMC1                                                   |
| Cellular Component | GO:0097197 | tetraspanin-enriched microdomain             | 2/2341  | 10/19559 | 0.3405251 | 0.6729287 | 0.6033154 | 2  | TSPAN14/SCIMP                                               |
| Cellular Component | GO:0005657 | replication fork                             | 10/2341 | 71/19559 | 0.3421255 | 0.6737955 | 0.6040925 | 10 | BLM/BAZ1B/POLA2/UHRF1/SMARCA1/DNMT1/TP53BP1/PLRG1/POLD3/XPA |

|                    |            |                                       |         |           |           |           |           |    |                                                                                                                                                                                       |
|--------------------|------------|---------------------------------------|---------|-----------|-----------|-----------|-----------|----|---------------------------------------------------------------------------------------------------------------------------------------------------------------------------------------|
| Cellular Component | GO:0045171 | intercellular bridge                  | 10/2341 | 71/19559  | 0.3421255 | 0.6737955 | 0.6040925 | 10 | DCTN1/MICAL1/MICAL3/MSRA/GSTM5/AGBL5/OLFM4/PRKCI/KCTD1/XPA                                                                                                                            |
| Cellular Component | GO:0071013 | catalytic step 2 spliceosome          | 12/2341 | 87/19559  | 0.3461265 | 0.68052   | 0.6101214 | 12 | SNRPD3/SF3B3/LSM7/PRPF8/DDX41/PRPF6/PLRG1/SRRM2/ZCCHC8/SYCRIP/RALY/TFIP11                                                                                                             |
| Cellular Component | GO:0030131 | clathrin adaptor complex              | 4/2341  | 25/19559  | 0.3505886 | 0.6869642 | 0.6158989 | 4  | AP2A1/AP1B1/AP1G2/EPS15                                                                                                                                                               |
| Cellular Component | GO:0031430 | M band                                | 4/2341  | 25/19559  | 0.3505886 | 0.6869642 | 0.6158989 | 4  | ENO1/MYOM1/FHL2/ANK2                                                                                                                                                                  |
| Cellular Component | GO:0036464 | cytoplasmic ribonucleoprotein granule | 30/2341 | 233/19559 | 0.3632917 | 0.7090214 | 0.6356743 | 30 | PIWIL4/RPTOR/CTSG/NXF1/LSM1/MOV10L1/SYNE1/GABPB1/TNRC6B/PABPC4/AGO1/LARP1/SHB/CSDE1/USP3/ZC3H12D/CTSH/SAMD4A/PITPNM1/LIMD1/AGO2/EDC3/TRIM5/ARNTL/RBPMS/UBAP2L/DIS3L2/EIF4G1/POLI/SHFL |
| Cellular Component | GO:0043596 | nuclear replication fork              | 6/2341  | 41/19559  | 0.3664161 | 0.7090214 | 0.6356743 | 6  | BAZ1B/POLA2/SMARCA1/PLRG1/POLD3/XPA                                                                                                                                                   |
| Cellular Component | GO:0005666 | RNA polymerase III complex            | 3/2341  | 18/19559  | 0.3674364 | 0.7090214 | 0.6356743 | 3  | POLR2F/CRCP/POLR1D                                                                                                                                                                    |
| Cellular Component | GO:0031143 | pseudopodium                          | 3/2341  | 18/19559  | 0.3674364 | 0.7090214 | 0.6356743 | 3  | ARRB1/ACTN1/ACTN4                                                                                                                                                                     |
| Cellular Component | GO:0032433 | filopodium tip                        | 3/2341  | 18/19559  | 0.3674364 | 0.7090214 | 0.6356743 | 3  | AP2A1/MYOSA/CYFIP1                                                                                                                                                                    |

|                    |            |                                      |         |           |           |           |           |    |                                                                                                                                                                                             |
|--------------------|------------|--------------------------------------|---------|-----------|-----------|-----------|-----------|----|---------------------------------------------------------------------------------------------------------------------------------------------------------------------------------------------|
| Cellular Component | GO:0097440 | apical dendrite                      | 3/2341  | 18/19559  | 0.3674364 | 0.7090214 | 0.6356743 | 3  | ITSN1/CLU/CPEB3                                                                                                                                                                             |
| Cellular Component | GO:009524  | postsynaptic cytosol                 | 3/2341  | 18/19559  | 0.3674364 | 0.7090214 | 0.6356743 | 3  | BAIAP2/HTT/NEDD4                                                                                                                                                                            |
| Cellular Component | GO:0005777 | peroxisome                           | 18/2341 | 137/19559 | 0.3739997 | 0.7090214 | 0.6356743 | 18 | ACSL1/IDI1/FAR2/AMACR/ACOXL/MYO5A/AGXT/CAT/PEX26/ACOX2/FIS1/DNM1L/HMGCL/PEX11B/CRYM/CD33/ZADH2/STING1                                                                                       |
| Cellular Component | GO:0042579 | microbody                            | 18/2341 | 137/19559 | 0.3739997 | 0.7090214 | 0.6356743 | 18 | ACSL1/IDI1/FAR2/AMACR/ACOXL/MYO5A/AGXT/CAT/PEX26/ACOX2/FIS1/DNM1L/HMGCL/PEX11B/CRYM/CD33/ZADH2/STING1                                                                                       |
| Cellular Component | GO:0036379 | myofilament                          | 4/2341  | 26/19559  | 0.3791788 | 0.7090214 | 0.6356743 | 4  | TNNT3/TMOD3/MYOM1/TMOD1                                                                                                                                                                     |
| Cellular Component | GO:0035770 | ribonucleoprotein granule            | 31/2341 | 243/19559 | 0.3805557 | 0.7090214 | 0.6356743 | 31 | PIWIL4/RPTOR/CTSG/NXF1/LSM1/MOV10L1/SYNE1/GABPB1/TNRC6B/PABPC4/AGO1/LARP1/SHB/CSDE1/USP3/ZC3H12D/CTSH/SAMD4A/PITPNM1/LIMD1/AGO2/EDC3/TRIM5/ARNTL/RBPMS/UBAP2L/DIS3L2/EIF4G1/POLI/GRSF1/SHFL |
| Cellular Component | GO:0031461 | cullin-RING ubiquitin ligase complex | 21/2341 | 162/19559 | 0.3829149 | 0.7090214 | 0.6356743 | 21 | FZR1/KLHL25/FBXO7/CUL3/DCAF15/CDC16/ZSWIM5/FBXL19/DCAF5/FBXL13/KCTD2/FBXL18/KLHL21/FBXL6/KLHL8/ANAPC7/PLRG1/FBXW11/WBTC1/DCAF17/FBH1                                                        |
| Cellular Component | GO:0005790 | smooth endoplasmic reticulum         | 5/2341  | 34/19559  | 0.3853481 | 0.7090214 | 0.6356743 | 5  | CALR/APP/MYO5A/CASQ1/SVIP                                                                                                                                                                   |
| Cellular Component | GO:0097386 | glial cell projection                | 5/2341  | 34/19559  | 0.3853481 | 0.7090214 | 0.6356743 | 5  | APP/MLC1/SLC1A2/EZR/PRLHR                                                                                                                                                                   |

|                    |            |                              |         |           |           |           |           |    |                                                                                                    |
|--------------------|------------|------------------------------|---------|-----------|-----------|-----------|-----------|----|----------------------------------------------------------------------------------------------------|
| Cellular Component | GO:0002116 | semaphorin receptor complex  | 2/2341  | 11/19559  | 0.3860199 | 0.7090214 | 0.6356743 | 2  | PLXNC1/NRP2                                                                                        |
| Cellular Component | GO:0002178 | palmitoyltransferase complex | 2/2341  | 11/19559  | 0.3860199 | 0.7090214 | 0.6356743 | 2  | SPTLC2/ORMDL3                                                                                      |
| Cellular Component | GO:0005652 | nuclear lamina               | 2/2341  | 11/19559  | 0.3860199 | 0.7090214 | 0.6356743 | 2  | NARF/LMNB2                                                                                         |
| Cellular Component | GO:0030122 | AP-2 adaptor complex         | 2/2341  | 11/19559  | 0.3860199 | 0.7090214 | 0.6356743 | 2  | AP2A1/EPS15                                                                                        |
| Cellular Component | GO:0031010 | ISWI-type complex            | 2/2341  | 11/19559  | 0.3860199 | 0.7090214 | 0.6356743 | 2  | CECR2/RSF1                                                                                         |
| Cellular Component | GO:0035253 | ciliary rootlet              | 2/2341  | 11/19559  | 0.3860199 | 0.7090214 | 0.6356743 | 2  | APP/KIF5C                                                                                          |
| Cellular Component | GO:0043220 | Schmidt-Lanterman incisure   | 2/2341  | 11/19559  | 0.3860199 | 0.7090214 | 0.6356743 | 2  | JAM3/PRKCI                                                                                         |
| Cellular Component | GO:1990907 | beta-catenin-TCF complex     | 2/2341  | 11/19559  | 0.3860199 | 0.7090214 | 0.6356743 | 2  | TCF7L2/TLE1                                                                                        |
| Cellular Component | GO:0005923 | bicellular tight junction    | 16/2341 | 122/19559 | 0.3882352 | 0.7090214 | 0.6356743 | 16 | PRKCZ/TBCD/TJP2/UBN1/FRMD4A/PMP22/FRMD4B/RAPGEF2/JAM3/PRKCI/MPP7/ARHGAP17/ARHGEF2/SYNPO/NPHP4/JAML |

|                    |            |                                                    |         |           |           |           |           |    |                                                                                                                                                                                                                                                                                      |
|--------------------|------------|----------------------------------------------------|---------|-----------|-----------|-----------|-----------|----|--------------------------------------------------------------------------------------------------------------------------------------------------------------------------------------------------------------------------------------------------------------------------------------|
| Cellular Component | GO:0000791 | euchromatin                                        | 6/2341  | 42/19559  | 0.3888231 | 0.7090214 | 0.6356743 | 6  | CECR2/CREB1/ASH2L/UHRF1/ANKRD2/TCF3                                                                                                                                                                                                                                                  |
| Cellular Component | GO:0071005 | U2-type precatalytic spliceosome                   | 7/2341  | 50/19559  | 0.3907885 | 0.7090214 | 0.6356743 | 7  | SNRPD3/SF3B3/LSM7/PRPF8/DHX16/PRPF6/SRRM2                                                                                                                                                                                                                                            |
| Cellular Component | GO:0005901 | caveola                                            | 11/2341 | 82/19559  | 0.3919842 | 0.7090214 | 0.6356743 | 11 | FXYD1/PACSIN2/TGFBR2/NOS1AP/MLC1/CDH1/CORO1C/F2R/SLC2A1/ADTRP/FLOT1                                                                                                                                                                                                                  |
| Cellular Component | GO:0005819 | spindle                                            | 46/2341 | 367/19559 | 0.3920523 | 0.7090214 | 0.6356743 | 46 | MAEA/DCTN1/LIMK2/CTDP1/MAD1L1/CSNK1D/TNKS/NDE1/ACOT13/RAE1/CTTN/CAPG/MICAL3/CHAMP1/CUL3/MYH9/APP/EML4/CDC16/POC1A/LATS2/CSPP1/TACC3/STAG1/AGBL5/FAM110A/PARP4/NUMA1/NEK6/KLHL21/RB1/TAF1D/ARHGEF2/KIFAP3/CYLD/SPAG5/HECW2/CDC14A/TUBGCP2/NDEL1/DIDO1/ERCC2/CLTCL1/CEP44/CEP350/IRAG2 |
| Cellular Component | GO:0036064 | ciliary basal body                                 | 20/2341 | 155/19559 | 0.3956079 | 0.7090214 | 0.6356743 | 20 | CSNK1D/KIAA0586/DISC1/ERC1/CCDC66/POC1A/CEP78/TTL4/IFT140/TTL11/SDCCAG8/DAAM1/RILPL1/KIFAP3/CYLD/CDC14A/EZR/TTL1/AGBL2/NPHP4                                                                                                                                                         |
| Cellular Component | GO:0000120 | RNA polymerase I transcription regulator complex   | 1/2341  | 4/19559   | 0.3994819 | 0.7090214 | 0.6356743 | 1  | TAF1D                                                                                                                                                                                                                                                                                |
| Cellular Component | GO:0000444 | MIS12/MIND type complex                            | 1/2341  | 4/19559   | 0.3994819 | 0.7090214 | 0.6356743 | 1  | MIS12                                                                                                                                                                                                                                                                                |
| Cellular Component | GO:0005588 | collagen type V trimer                             | 1/2341  | 4/19559   | 0.3994819 | 0.7090214 | 0.6356743 | 1  | COL5A1                                                                                                                                                                                                                                                                               |
| Cellular Component | GO:0005757 | mitochondrial permeability transition pore complex | 1/2341  | 4/19559   | 0.3994819 | 0.7090214 | 0.6356743 | 1  | SPG7                                                                                                                                                                                                                                                                                 |

|                    |            |                                                    |        |         |           |           |           |   |         |
|--------------------|------------|----------------------------------------------------|--------|---------|-----------|-----------|-----------|---|---------|
| Cellular Component | GO:0005853 | eukaryotic translation elongation factor 1 complex | 1/2341 | 4/19559 | 0.3994819 | 0.7090214 | 0.6356743 | 1 | EEF1D   |
| Cellular Component | GO:0008275 | gamma-tubulin small complex                        | 1/2341 | 4/19559 | 0.3994819 | 0.7090214 | 0.6356743 | 1 | TUBGCP2 |
| Cellular Component | GO:0016013 | syntrophin complex                                 | 1/2341 | 4/19559 | 0.3994819 | 0.7090214 | 0.6356743 | 1 | SNTA1   |
| Cellular Component | GO:0016035 | zeta DNA polymerase complex                        | 1/2341 | 4/19559 | 0.3994819 | 0.7090214 | 0.6356743 | 1 | POLD3   |
| Cellular Component | GO:0019815 | B cell receptor complex                            | 1/2341 | 4/19559 | 0.3994819 | 0.7090214 | 0.6356743 | 1 | CD79A   |
| Cellular Component | GO:0030892 | mitotic cohesin complex                            | 1/2341 | 4/19559 | 0.3994819 | 0.7090214 | 0.6356743 | 1 | RAD21L1 |
| Cellular Component | GO:0030906 | retromer, cargo-selective complex                  | 1/2341 | 4/19559 | 0.3994819 | 0.7090214 | 0.6356743 | 1 | VPS26B  |
| Cellular Component | GO:0031499 | TRAMP complex                                      | 1/2341 | 4/19559 | 0.3994819 | 0.7090214 | 0.6356743 | 1 | ZCCHC8  |
| Cellular Component | GO:0032449 | CBM complex                                        | 1/2341 | 4/19559 | 0.3994819 | 0.7090214 | 0.6356743 | 1 | BCL10   |

|                    |            |                                                |        |         |           |           |           |   |        |
|--------------------|------------|------------------------------------------------|--------|---------|-----------|-----------|-----------|---|--------|
| Cellular Component | GO:0032777 | Piccolo NuA4 histone acetyltransferase complex | 1/2341 | 4/19559 | 0.3994819 | 0.7090214 | 0.6356743 | 1 | EPC1   |
| Cellular Component | GO:0032983 | kainate selective glutamate receptor complex   | 1/2341 | 4/19559 | 0.3994819 | 0.7090214 | 0.6356743 | 1 | GRIK4  |
| Cellular Component | GO:0033011 | perinuclear theca                              | 1/2341 | 4/19559 | 0.3994819 | 0.7090214 | 0.6356743 | 1 | CCIN   |
| Cellular Component | GO:0033256 | I-kappaB/NF-kappaB complex                     | 1/2341 | 4/19559 | 0.3994819 | 0.7090214 | 0.6356743 | 1 | BCL3   |
| Cellular Component | GO:0033269 | internode region of axon                       | 1/2341 | 4/19559 | 0.3994819 | 0.7090214 | 0.6356743 | 1 | MBP    |
| Cellular Component | GO:0034657 | GID complex                                    | 1/2341 | 4/19559 | 0.3994819 | 0.7090214 | 0.6356743 | 1 | MAEA   |
| Cellular Component | GO:0035339 | SPOTS complex                                  | 1/2341 | 4/19559 | 0.3994819 | 0.7090214 | 0.6356743 | 1 | ORMDL3 |
| Cellular Component | GO:0035363 | histone locus body                             | 1/2341 | 4/19559 | 0.3994819 | 0.7090214 | 0.6356743 | 1 | ZC3H8  |
| Cellular Component | GO:0043625 | delta DNA polymerase complex                   | 1/2341 | 4/19559 | 0.3994819 | 0.7090214 | 0.6356743 | 1 | POLD3  |

|                    |            |                                            |        |         |           |           |           |   |         |
|--------------------|------------|--------------------------------------------|--------|---------|-----------|-----------|-----------|---|---------|
| Cellular Component | GO:0044393 | microspike                                 | 1/2341 | 4/19559 | 0.3994819 | 0.7090214 | 0.6356743 | 1 | EZR     |
| Cellular Component | GO:0071953 | elastic fiber                              | 1/2341 | 4/19559 | 0.3994819 | 0.7090214 | 0.6356743 | 1 | MFAP4   |
| Cellular Component | GO:0072558 | NLRP1 inflammasome complex                 | 1/2341 | 4/19559 | 0.3994819 | 0.7090214 | 0.6356743 | 1 | CASP1   |
| Cellular Component | GO:0097444 | spine apparatus                            | 1/2341 | 4/19559 | 0.3994819 | 0.7090214 | 0.6356743 | 1 | SYNPO   |
| Cellular Component | GO:0097452 | GAIT complex                               | 1/2341 | 4/19559 | 0.3994819 | 0.7090214 | 0.6356743 | 1 | SYNCRIP |
| Cellular Component | GO:0097457 | hippocampal mossy fiber                    | 1/2341 | 4/19559 | 0.3994819 | 0.7090214 | 0.6356743 | 1 | MICAL1  |
| Cellular Component | GO:0150005 | enzyme activator complex                   | 1/2341 | 4/19559 | 0.3994819 | 0.7090214 | 0.6356743 | 1 | CCNH    |
| Cellular Component | GO:1905103 | integral component of lysosomal membrane   | 1/2341 | 4/19559 | 0.3994819 | 0.7090214 | 0.6356743 | 1 | NPC1    |
| Cellular Component | GO:1990578 | perinuclear endoplasmic reticulum membrane | 1/2341 | 4/19559 | 0.3994819 | 0.7090214 | 0.6356743 | 1 | PIK3R1  |



|                    |            |                                                         |        |          |           |           |           |   |                                   |
|--------------------|------------|---------------------------------------------------------|--------|----------|-----------|-----------|-----------|---|-----------------------------------|
| Cellular Component | GO:1990812 | growth cone filopodium                                  | 1/2341 | 4/19559  | 0.3994819 | 0.7090214 | 0.6356743 | 1 | APP                               |
| Cellular Component | GO:0016010 | dystrophin-associated glycoprotein complex              | 3/2341 | 19/19559 | 0.401575  | 0.7090214 | 0.6356743 | 3 | SNTB2/SNTA1/SNTB1                 |
| Cellular Component | GO:0016327 | apicolateral plasma membrane                            | 3/2341 | 19/19559 | 0.401575  | 0.7090214 | 0.6356743 | 3 | JUP/PALM/NEDD4                    |
| Cellular Component | GO:0032426 | stereocilium tip                                        | 3/2341 | 19/19559 | 0.401575  | 0.7090214 | 0.6356743 | 3 | ESPN/TMC1/CDC14A                  |
| Cellular Component | GO:0090665 | glycoprotein complex                                    | 3/2341 | 19/19559 | 0.401575  | 0.7090214 | 0.6356743 | 3 | SNTB2/SNTA1/SNTB1                 |
| Cellular Component | GO:0098945 | intrinsic component of presynaptic active zone membrane | 3/2341 | 19/19559 | 0.401575  | 0.7090214 | 0.6356743 | 3 | NRXN1/P2RX1/NECTIN1               |
| Cellular Component | GO:0033176 | proton-transporting V-type ATPase complex               | 4/2341 | 27/19559 | 0.4076314 | 0.716443  | 0.6423282 | 4 | ATP6V1B2/ATP6V0B/ATP6V0C/ATP6V1C1 |
| Cellular Component | GO:0034364 | high-density lipoprotein particle                       | 4/2341 | 27/19559 | 0.4076314 | 0.716443  | 0.6423282 | 4 | LIPC/HDLBP/PLTP/CLU               |
| Cellular Component | GO:0044232 | organelle membrane contact site                         | 4/2341 | 27/19559 | 0.4076314 | 0.716443  | 0.6423282 | 4 | ATG14/PDZD8/GRAMD1A/GRAMD2A       |

|                    |            |                                            |         |           |           |           |           |    |                                                                                                                                 |
|--------------------|------------|--------------------------------------------|---------|-----------|-----------|-----------|-----------|----|---------------------------------------------------------------------------------------------------------------------------------|
| Cellular Component | GO:0031093 | platelet alpha granule lumen               | 9/2341  | 67/19559  | 0.4100906 | 0.718847  | 0.6444835 | 9  | SERPINA1/THBS1/ACTN1/APP/ACTN4/CLU/TGFB1/PDGFB/CYRIB                                                                            |
| Cellular Component | GO:0080008 | Cul4-RING E3 ubiquitin ligase complex      | 5/2341  | 35/19559  | 0.4102386 | 0.718847  | 0.6444835 | 5  | DCAF15/DCAF5/PLRG1/WBTC1/DCAF17                                                                                                 |
| Cellular Component | GO:0000922 | spindle pole                               | 21/2341 | 165/19559 | 0.4168579 | 0.7293441 | 0.6538947 | 21 | DCTN1/CTDP1/MAD1L1/TNKS/NDE1/RAE1/CUL3/POC1A/LATS2/CSPP1/TACC3/STAG1/FAM110A/NUMA1/NEK6/KLHL21/SPAG5/CDC14A/TUBGCP2/CEP44/IRAG2 |
| Cellular Component | GO:0072686 | mitotic spindle                            | 17/2341 | 133/19559 | 0.4252283 | 0.7380006 | 0.6616557 | 17 | DCTN1/LIMK2/MAD1L1/TNKS/RAE1/CTTN/CAPG/CUL3/EML4/TACC3/STAG1/AGBL5/NUMA1/TAF1D/SPAG5/HECW2/CDC14A                               |
| Cellular Component | GO:0005637 | nuclear inner membrane                     | 8/2341  | 60/19559  | 0.4298793 | 0.7380006 | 0.6616557 | 8  | ERN1/SMAD3/ITPR1/LMNB2/MFSD10/P2RX1/P2RX5/TERB2                                                                                 |
| Cellular Component | GO:0000439 | transcription factor TFIID core complex    | 2/2341  | 12/19559  | 0.4300762 | 0.7380006 | 0.6616557 | 2  | CCNH/ERCC2                                                                                                                      |
| Cellular Component | GO:0000812 | Swr1 complex                               | 2/2341  | 12/19559  | 0.4300762 | 0.7380006 | 0.6616557 | 2  | SRCAP/RUVBL1                                                                                                                    |
| Cellular Component | GO:0005845 | mRNA cap binding complex                   | 2/2341  | 12/19559  | 0.4300762 | 0.7380006 | 0.6616557 | 2  | AGO2/CYFIP1                                                                                                                     |
| Cellular Component | GO:0005890 | sodium:potassium-exchanging ATPase complex | 2/2341  | 12/19559  | 0.4300762 | 0.7380006 | 0.6616557 | 2  | FXYD2/FXYD1                                                                                                                     |

|                    |            |                                              |        |          |           |           |           |   |                                |
|--------------------|------------|----------------------------------------------|--------|----------|-----------|-----------|-----------|---|--------------------------------|
| Cellular Component | GO:0030897 | HOPS complex                                 | 2/2341 | 12/19559 | 0.4300762 | 0.7380006 | 0.6616557 | 2 | VPS18/HOOK2                    |
| Cellular Component | GO:0031680 | G-protein beta/gamma-subunit complex         | 2/2341 | 12/19559 | 0.4300762 | 0.7380006 | 0.6616557 | 2 | GNG7/GNG2                      |
| Cellular Component | GO:0042555 | MCM complex                                  | 2/2341 | 12/19559 | 0.4300762 | 0.7380006 | 0.6616557 | 2 | MCM5/MCM2                      |
| Cellular Component | GO:0043020 | NADPH oxidase complex                        | 2/2341 | 12/19559 | 0.4300762 | 0.7380006 | 0.6616557 | 2 | NCF4/NCF2                      |
| Cellular Component | GO:0044214 | spanning component of plasma membrane        | 2/2341 | 12/19559 | 0.4300762 | 0.7380006 | 0.6616557 | 2 | SLC24A4/CDHR2                  |
| Cellular Component | GO:0071564 | npBAF complex                                | 2/2341 | 12/19559 | 0.4300762 | 0.7380006 | 0.6616557 | 2 | SMARCA2/SMARCD1                |
| Cellular Component | GO:1990454 | L-type voltage-gated calcium channel complex | 2/2341 | 12/19559 | 0.4300762 | 0.7380006 | 0.6616557 | 2 | CACNA1C/NOS1AP                 |
| Cellular Component | GO:0031463 | Cul3-RING ubiquitin ligase complex           | 5/2341 | 36/19559 | 0.4349784 | 0.7412497 | 0.6645687 | 5 | KLHL25/CUL3/KCTD2/KLHL21/KLHL8 |
| Cellular Component | GO:0097546 | ciliary base                                 | 5/2341 | 36/19559 | 0.4349784 | 0.7412497 | 0.6645687 | 5 | PRKAR1B/SUFU/MOK/DISC1/NPHP4   |

|                    |            |                                |         |           |           |           |           |    |                                                                                                                           |
|--------------------|------------|--------------------------------|---------|-----------|-----------|-----------|-----------|----|---------------------------------------------------------------------------------------------------------------------------|
| Cellular Component | GO:0098576 | luminal side of membrane       | 5/2341  | 36/19559  | 0.4349784 | 0.7412497 | 0.6645687 | 5  | CALR/BDH1/HLA-C/HM13/HLA-F                                                                                                |
| Cellular Component | GO:0005721 | pericentric heterochromatin    | 3/2341  | 20/19559  | 0.4351647 | 0.7412497 | 0.6645687 | 3  | BAZ1B/KDM4C/DNMT1                                                                                                         |
| Cellular Component | GO:0031082 | BLOC complex                   | 3/2341  | 20/19559  | 0.4351647 | 0.7412497 | 0.6645687 | 3  | PI4K2A/HPS6/DTNBP1                                                                                                        |
| Cellular Component | GO:0005875 | microtubule associated complex | 20/2341 | 159/19559 | 0.4422029 | 0.7445223 | 0.6675027 | 20 | DCTN1/KIF13B/DNAH3/NDE1/MAP7/KIF13A/MEFV/DYNC1H1/DISC1/PXN/DCTN2/KIF21B/KIF5C/KIF1B/MAP1A/KIFAP3/DNAI2/FBXW11/NDEL1/KIFC3 |
| Cellular Component | GO:0030670 | phagocytic vesicle membrane    | 10/2341 | 77/19559  | 0.4427562 | 0.7445223 | 0.6675027 | 10 | CALR/SLC11A1/RAB11FIP1/DNM2/RAB31/HLA-C/HLA-F/RAB43/ATP6V0B/ATP6V0C                                                       |
| Cellular Component | GO:0071011 | precatalytic spliceosome       | 7/2341  | 53/19559  | 0.4521414 | 0.7445223 | 0.6675027 | 7  | SNRPD3/SF3B3/LSM7/PRPF8/DHX16/PRPF6/SRRM2                                                                                 |
| Cellular Component | GO:0001533 | cornified envelope             | 6/2341  | 45/19559  | 0.4556771 | 0.7445223 | 0.6675027 | 6  | CSTA/JUP/PKP1/CNFN/KAZN/PPL                                                                                               |
| Cellular Component | GO:1905348 | endonuclease complex           | 5/2341  | 37/19559  | 0.4594804 | 0.7445223 | 0.6675027 | 5  | ERN1/AGO1/EME1/AGO2/SLX4                                                                                                  |
| Cellular Component | GO:0005689 | U12-type spliceosomal complex  | 4/2341  | 29/19559  | 0.4635949 | 0.7445223 | 0.6675027 | 4  | SNRPD3/SF3B3/LSM7/SNRNP35                                                                                                 |

|                    |            |                                                                      |         |           |           |           |           |    |                                                                                                                                                                                                                                                                                                                                |
|--------------------|------------|----------------------------------------------------------------------|---------|-----------|-----------|-----------|-----------|----|--------------------------------------------------------------------------------------------------------------------------------------------------------------------------------------------------------------------------------------------------------------------------------------------------------------------------------|
| Cellular Component | GO:0044295 | axonal growth cone                                                   | 4/2341  | 29/19559  | 0.4635949 | 0.7445223 | 0.6675027 | 4  | WDR47/KIF5C/CYFIP1/TRPV2                                                                                                                                                                                                                                                                                                       |
| Cellular Component | GO:0071556 | integral component of lumenal side of endoplasmic reticulum membrane | 4/2341  | 29/19559  | 0.4635949 | 0.7445223 | 0.6675027 | 4  | CALR/HLA-C/HM13/HLA-F                                                                                                                                                                                                                                                                                                          |
| Cellular Component | GO:0098553 | lumenal side of endoplasmic reticulum membrane                       | 4/2341  | 29/19559  | 0.4635949 | 0.7445223 | 0.6675027 | 4  | CALR/HLA-C/HM13/HLA-F                                                                                                                                                                                                                                                                                                          |
| Cellular Component | GO:0005771 | multivesicular body                                                  | 8/2341  | 62/19559  | 0.4676782 | 0.7445223 | 0.6675027 | 8  | SORL1/PRKAR1B/SFTPD/CTSH/RAB27A/CRHBP/GIMAP5/CD79A                                                                                                                                                                                                                                                                             |
| Cellular Component | GO:0005697 | telomerase holoenzyme complex                                        | 3/2341  | 21/19559  | 0.4680206 | 0.7445223 | 0.6675027 | 3  | SNRPD3/SMG7/SMG6                                                                                                                                                                                                                                                                                                               |
| Cellular Component | GO:0062023 | collagen-containing extracellular matrix                             | 52/2341 | 427/19559 | 0.4691415 | 0.7445223 | 0.6675027 | 52 | ELANE/SLPI/CTS2/PRTN3/LTBP1/S100A8/CTSG/TIMP2/COL23A1/CALR/SERPINA1/MFAP4/COL17A1/EMILIN2/VIT/ANGPT1/TGFBI/COL4A2/COLO/ANXA6/EGFL7/CTSD/THBS1/PODNL1/CTSH/EGFLAM/TNXB/PCSK6/COL12A1/CLU/SDC2/F12/SPARCL1/TGFB1/FCN1/TGFB11/WNT5B/PDGFB/CTSB/COL14A1/SBSPON/AEBP1/PKM/COL5A1/COL28A1/C1QB/ANGPTL6/LAMB3/ADAMDEC1/EYS/ANXA7/P3H1 |
| Cellular Component | GO:0000125 | PCAF complex                                                         | 1/2341  | 5/19559   | 0.4713721 | 0.7445223 | 0.6675027 | 1  | TAF10                                                                                                                                                                                                                                                                                                                          |
| Cellular Component | GO:0000243 | commitment complex                                                   | 1/2341  | 5/19559   | 0.4713721 | 0.7445223 | 0.6675027 | 1  | SNRPD3                                                                                                                                                                                                                                                                                                                         |
| Cellular Component | GO:0000798 | nuclear cohesin complex                                              | 1/2341  | 5/19559   | 0.4713721 | 0.7445223 | 0.6675027 | 1  | RAD21L1                                                                                                                                                                                                                                                                                                                        |

|                    |            |                                                                                          |        |         |           |           |           |   |         |
|--------------------|------------|------------------------------------------------------------------------------------------|--------|---------|-----------|-----------|-----------|---|---------|
| Cellular Component | GO:0000923 | equatorial microtubule organizing center                                                 | 1/2341 | 5/19559 | 0.4713721 | 0.7445223 | 0.6675027 | 1 | TUBGCP2 |
| Cellular Component | GO:0001405 | PAM complex, Tim23 associated import motor                                               | 1/2341 | 5/19559 | 0.4713721 | 0.7445223 | 0.6675027 | 1 | PAM16   |
| Cellular Component | GO:0005658 | alpha DNA polymerase:primase complex                                                     | 1/2341 | 5/19559 | 0.4713721 | 0.7445223 | 0.6675027 | 1 | POLA2   |
| Cellular Component | GO:0005749 | mitochondrial respiratory chain complex II, succinate dehydrogenase complex (ubiquinone) | 1/2341 | 5/19559 | 0.4713721 | 0.7445223 | 0.6675027 | 1 | SDHD    |
| Cellular Component | GO:0005854 | nascent polypeptide-associated complex                                                   | 1/2341 | 5/19559 | 0.4713721 | 0.7445223 | 0.6675027 | 1 | NACAD   |
| Cellular Component | GO:0005947 | mitochondrial alpha-ketoglutarate dehydrogenase complex                                  | 1/2341 | 5/19559 | 0.4713721 | 0.7445223 | 0.6675027 | 1 | BCKDHA  |
| Cellular Component | GO:0005955 | calcineurin complex                                                                      | 1/2341 | 5/19559 | 0.4713721 | 0.7445223 | 0.6675027 | 1 | ITPR1   |
| Cellular Component | GO:0008303 | caspase complex                                                                          | 1/2341 | 5/19559 | 0.4713721 | 0.7445223 | 0.6675027 | 1 | PIGU    |
| Cellular Component | GO:0030896 | checkpoint clamp complex                                                                 | 1/2341 | 5/19559 | 0.4713721 | 0.7445223 | 0.6675027 | 1 | HUS1    |

|                    |            |                                 |        |         |           |           |           |   |          |
|--------------------|------------|---------------------------------|--------|---------|-----------|-----------|-----------|---|----------|
| Cellular Component | GO:0031415 | NatA complex                    | 1/2341 | 5/19559 | 0.4713721 | 0.7445223 | 0.6675027 | 1 | NAA16    |
| Cellular Component | GO:0032783 | super elongation complex        | 1/2341 | 5/19559 | 0.4713721 | 0.7445223 | 0.6675027 | 1 | AFF1     |
| Cellular Component | GO:0033093 | Weibel-Palade body              | 1/2341 | 5/19559 | 0.4713721 | 0.7445223 | 0.6675027 | 1 | RAB27A   |
| Cellular Component | GO:0033106 | cis-Golgi network membrane      | 1/2341 | 5/19559 | 0.4713721 | 0.7445223 | 0.6675027 | 1 | TRAPPC3L |
| Cellular Component | GO:0033503 | HULC complex                    | 1/2341 | 5/19559 | 0.4713721 | 0.7445223 | 0.6675027 | 1 | RNF40    |
| Cellular Component | GO:0034991 | nuclear meiotic cohesin complex | 1/2341 | 5/19559 | 0.4713721 | 0.7445223 | 0.6675027 | 1 | RAD21L1  |
| Cellular Component | GO:0036021 | endolysosome lumen              | 1/2341 | 5/19559 | 0.4713721 | 0.7445223 | 0.6675027 | 1 | CTSB     |
| Cellular Component | GO:0042765 | GPI-anchor transamidase complex | 1/2341 | 5/19559 | 0.4713721 | 0.7445223 | 0.6675027 | 1 | PIGU     |
| Cellular Component | GO:0044302 | dentate gyrus mossy fiber       | 1/2341 | 5/19559 | 0.4713721 | 0.7445223 | 0.6675027 | 1 | MICAL1   |

|                    |            |                                              |        |         |           |           |           |   |        |
|--------------------|------------|----------------------------------------------|--------|---------|-----------|-----------|-----------|---|--------|
| Cellular Component | GO:0045257 | succinate dehydrogenase complex (ubiquinone) | 1/2341 | 5/19559 | 0.4713721 | 0.7445223 | 0.6675027 | 1 | SDHD   |
| Cellular Component | GO:0045273 | respiratory chain complex II                 | 1/2341 | 5/19559 | 0.4713721 | 0.7445223 | 0.6675027 | 1 | SDHD   |
| Cellular Component | GO:0045281 | succinate dehydrogenase complex              | 1/2341 | 5/19559 | 0.4713721 | 0.7445223 | 0.6675027 | 1 | SDHD   |
| Cellular Component | GO:0045283 | fumarate reductase complex                   | 1/2341 | 5/19559 | 0.4713721 | 0.7445223 | 0.6675027 | 1 | SDHD   |
| Cellular Component | GO:0060171 | stereocilium membrane                        | 1/2341 | 5/19559 | 0.4713721 | 0.7445223 | 0.6675027 | 1 | MYO1C  |
| Cellular Component | GO:0070552 | BRISC complex                                | 1/2341 | 5/19559 | 0.4713721 | 0.7445223 | 0.6675027 | 1 | BABAM2 |
| Cellular Component | GO:0070695 | FHF complex                                  | 1/2341 | 5/19559 | 0.4713721 | 0.7445223 | 0.6675027 | 1 | HOOK2  |
| Cellular Component | GO:0071547 | piP-body                                     | 1/2341 | 5/19559 | 0.4713721 | 0.7445223 | 0.6675027 | 1 | PIWIL4 |
| Cellular Component | GO:0071817 | MMXD complex                                 | 1/2341 | 5/19559 | 0.4713721 | 0.7445223 | 0.6675027 | 1 | ERCC2  |



|                    |            |                                         |         |          |           |           |           |    |                                                                      |
|--------------------|------------|-----------------------------------------|---------|----------|-----------|-----------|-----------|----|----------------------------------------------------------------------|
| Cellular Component | GO:0097025 | MPP7-DLG1-LIN7 complex                  | 1/2341  | 5/19559  | 0.4713721 | 0.7445223 | 0.6675027 | 1  | MPP7                                                                 |
| Cellular Component | GO:0097179 | protease inhibitor complex              | 1/2341  | 5/19559  | 0.4713721 | 0.7445223 | 0.6675027 | 1  | CASP1                                                                |
| Cellular Component | GO:0098591 | external side of apical plasma membrane | 1/2341  | 5/19559  | 0.4713721 | 0.7445223 | 0.6675027 | 1  | SLC7A5                                                               |
| Cellular Component | GO:0098871 | postsynaptic actin cytoskeleton         | 1/2341  | 5/19559  | 0.4713721 | 0.7445223 | 0.6675027 | 1  | ITSN1                                                                |
| Cellular Component | GO:1904090 | peptidase inhibitor complex             | 1/2341  | 5/19559  | 0.4713721 | 0.7445223 | 0.6675027 | 1  | CASP1                                                                |
| Cellular Component | GO:1990393 | 3M complex                              | 1/2341  | 5/19559  | 0.4713721 | 0.7445223 | 0.6675027 | 1  | CCDC8                                                                |
| Cellular Component | GO:0120111 | neuron projection cytoplasm             | 11/2341 | 87/19559 | 0.4717761 | 0.7445223 | 0.6675027 | 11 | SPG7/DYNC1H1/BAIAP2/CCIN/KIF5C/KIF1B/MAP1A/AP3D1/FBXW11/NDEL1/DTNBP1 |
| Cellular Component | GO:0032420 | stereocilium                            | 7/2341  | 54/19559 | 0.472363  | 0.7445223 | 0.6675027 | 7  | CDH23/ATP8B1/ESPN/TSPPEAR/TMC1/MYO1C/CDC14A                          |
| Cellular Component | GO:0000974 | Prp19 complex                           | 2/2341  | 13/19559 | 0.4723865 | 0.7445223 | 0.6675027 | 2  | CTNBL1/PLRG1                                                         |

|                    |            |                                         |         |           |           |           |           |    |                                                                                                    |
|--------------------|------------|-----------------------------------------|---------|-----------|-----------|-----------|-----------|----|----------------------------------------------------------------------------------------------------|
| Cellular Component | GO:0001741 | XY body                                 | 2/2341  | 13/19559  | 0.4723865 | 0.7445223 | 0.6675027 | 2  | SIN3B/PBX4                                                                                         |
| Cellular Component | GO:0005675 | transcription factor TFIID holo complex | 2/2341  | 13/19559  | 0.4723865 | 0.7445223 | 0.6675027 | 2  | CCNH/ERCC2                                                                                         |
| Cellular Component | GO:0005736 | RNA polymerase I complex                | 2/2341  | 13/19559  | 0.4723865 | 0.7445223 | 0.6675027 | 2  | POLR2F/POLR1D                                                                                      |
| Cellular Component | GO:0071014 | post-mRNA release spliceosomal complex  | 2/2341  | 13/19559  | 0.4723865 | 0.7445223 | 0.6675027 | 2  | CCDC12/TFIP11                                                                                      |
| Cellular Component | GO:0097542 | ciliary tip                             | 6/2341  | 46/19559  | 0.4776193 | 0.7507296 | 0.6730679 | 6  | SUFU/CLUAP1/IFT140/TTC21B/KIFAP3/CYLD                                                              |
| Cellular Component | GO:1902562 | H4 histone acetyltransferase complex    | 6/2341  | 46/19559  | 0.4776193 | 0.7507296 | 0.6730679 | 6  | KANSL1/EPC1/KANSL2/UBAP2L/RUVBL1/POLE4                                                             |
| Cellular Component | GO:0070160 | tight junction                          | 16/2341 | 129/19559 | 0.4798028 | 0.7531411 | 0.6752299 | 16 | PRKCZ/TBCD/TJP2/UBN1/FRMD4A/PMP22/FRMD4B/RAPGEF2/JAM3/PRKCI/MPP7/ARHGAP17/ARHGEF2/SYNPO/NPHP4/JAML |
| Cellular Component | GO:0000803 | sex chromosome                          | 4/2341  | 30/19559  | 0.4908767 | 0.768444  | 0.6889498 | 4  | SIN3B/PBX4/PCGF3/MACROH2A2                                                                         |
| Cellular Component | GO:0071007 | U2-type catalytic step 2 spliceosome    | 4/2341  | 30/19559  | 0.4908767 | 0.768444  | 0.6889498 | 4  | SNRPD3/PRPF8/PLRG1/SRRM2                                                                           |

|                    |            |                               |         |           |           |           |           |    |                                                                                                                                 |
|--------------------|------------|-------------------------------|---------|-----------|-----------|-----------|-----------|----|---------------------------------------------------------------------------------------------------------------------------------|
| Cellular Component | GO:0005680 | anaphase-promoting complex    | 3/2341  | 22/19559  | 0.4999896 | 0.778     | 0.6975172 | 3  | FZR1/CDC16/ANAPC7                                                                                                               |
| Cellular Component | GO:0005682 | U5 snRNP                      | 3/2341  | 22/19559  | 0.4999896 | 0.778     | 0.6975172 | 3  | SNRPD3/PRPF8/PRPF6                                                                                                              |
| Cellular Component | GO:0005865 | striated muscle thin filament | 3/2341  | 22/19559  | 0.4999896 | 0.778     | 0.6975172 | 3  | TNNT3/TMOD3/TMOD1                                                                                                               |
| Cellular Component | GO:0031258 | lamellipodium membrane        | 3/2341  | 22/19559  | 0.4999896 | 0.778     | 0.6975172 | 3  | DOCK8/ITGB3/NCKAP1                                                                                                              |
| Cellular Component | GO:0030666 | endocytic vesicle membrane    | 20/2341 | 164/19559 | 0.5003345 | 0.778     | 0.6975172 | 20 | CALR/AP2A1/CD9/SLC11A1/RAB11FIP1/DNM2/RAB31/HLA-C/HLA-F/COLEC12/WASL/NOSTRIN/MARCO/STAB2/EPN2/RAB43/WNT5B/ATP6V0B/EPS15/ATP6V0C |
| Cellular Component | GO:0032040 | small-subunit processome      | 5/2341  | 39/19559  | 0.5074605 | 0.7869708 | 0.70556   | 5  | WDR46/NOP14/NOL6/FBL/UTP4                                                                                                       |
| Cellular Component | GO:0032994 | protein-lipid complex         | 5/2341  | 39/19559  | 0.5074605 | 0.7869708 | 0.70556   | 5  | LIPC/HDLBP/PLTP/BIN1/CLU                                                                                                        |
| Cellular Component | GO:0043195 | terminal bouton               | 7/2341  | 56/19559  | 0.5121793 | 0.7877824 | 0.7062877 | 7  | AAK1/MICAL1/ILK/PTPRN2/AP3D1/CYFIP1/CABP4                                                                                       |
| Cellular Component | GO:0008278 | cohesin complex               | 2/2341  | 14/19559  | 0.5127377 | 0.7877824 | 0.7062877 | 2  | STAG1/RAD21L1                                                                                                                   |

|                    |            |                                         |         |           |           |           |           |    |                                                                                                 |
|--------------------|------------|-----------------------------------------|---------|-----------|-----------|-----------|-----------|----|-------------------------------------------------------------------------------------------------|
| Cellular Component | GO:0033162 | melanosome membrane                     | 2/2341  | 14/19559  | 0.5127377 | 0.7877824 | 0.7062877 | 2  | RAB27A/DTNBP1                                                                                   |
| Cellular Component | GO:0045009 | chitosome                               | 2/2341  | 14/19559  | 0.5127377 | 0.7877824 | 0.7062877 | 2  | RAB27A/DTNBP1                                                                                   |
| Cellular Component | GO:0045239 | tricarboxylic acid cycle enzyme complex | 2/2341  | 14/19559  | 0.5127377 | 0.7877824 | 0.7062877 | 2  | OGDH/BCKDHA                                                                                     |
| Cellular Component | GO:0090741 | pigment granule membrane                | 2/2341  | 14/19559  | 0.5127377 | 0.7877824 | 0.7062877 | 2  | RAB27A/DTNBP1                                                                                   |
| Cellular Component | GO:1990023 | mitotic spindle midzone                 | 2/2341  | 14/19559  | 0.5127377 | 0.7877824 | 0.7062877 | 2  | CTTN/NUMA1                                                                                      |
| Cellular Component | GO:0048787 | presynaptic active zone membrane        | 4/2341  | 31/19559  | 0.5175623 | 0.788062  | 0.7065383 | 4  | NRXN1/P2RX1/CNTNAP1/NECTIN1                                                                     |
| Cellular Component | GO:0031970 | organelle envelope lumen                | 11/2341 | 90/19559  | 0.5188381 | 0.788062  | 0.7065383 | 11 | SORL1/COX19/FGR/CHCHD5/APP/CAT/IMMT/PPOX/AK2/SDHAF3/STMP1                                       |
| Cellular Component | GO:0000784 | nuclear chromosome, telomeric region    | 15/2341 | 124/19559 | 0.5238615 | 0.788062  | 0.7065383 | 15 | TNKS/BRCA2/HMBOX1/MCM5/WRNIP1/WDR82/MCM2/PPP1CB/TP53BP1/SP100/ERCC1/SLX4/TFIP11/TERB2/MACROH2A2 |
| Cellular Component | GO:1990391 | DNA repair complex                      | 5/2341  | 40/19559  | 0.5308023 | 0.788062  | 0.7065383 | 5  | TP53BP1/ERCC1/SLX4/XPA/PAXX                                                                     |

|                    |            |                                                     |         |           |           |          |           |    |                                                                                                                                      |
|--------------------|------------|-----------------------------------------------------|---------|-----------|-----------|----------|-----------|----|--------------------------------------------------------------------------------------------------------------------------------------|
| Cellular Component | GO:0046930 | pore complex                                        | 3/2341  | 23/19559  | 0.5309471 | 0.788062 | 0.7065383 | 3  | SPG7/PLEKHA7/BCL2                                                                                                                    |
| Cellular Component | GO:0005741 | mitochondrial outer membrane                        | 23/2341 | 192/19559 | 0.531713  | 0.788062 | 0.7065383 | 23 | VAT1/HK1/ACSL1/ULK1/BMF/SLC11A2/AIFM2/HK2/ACACB/MSTO1/IMMT/FIS1/BCL2/DNM1L/MIEF1/BCL2L1/CPT1A/LPIN1/AGPAT5/SPART/STING1/STMP1/MTARC1 |
| Cellular Component | GO:0010494 | cytoplasmic stress granule                          | 9/2341  | 74/19559  | 0.532913  | 0.788062 | 0.7065383 | 9  | RPTOR/CTSG/NXF1/PABPC4/LARP1/CSDE1/RBPMS/UBAP2L/EIF4G1                                                                               |
| Cellular Component | GO:0099056 | integral component of presynaptic membrane          | 9/2341  | 74/19559  | 0.532913  | 0.788062 | 0.7065383 | 9  | CADM3/GRIK4/HTR3A/NRXN1/SLC1A2/CHRM2/SLC1A6/P2RX1/NECTIN1                                                                            |
| Cellular Component | GO:0001652 | granular component                                  | 1/2341  | 6/19559   | 0.5346593 | 0.788062 | 0.7065383 | 1  | FBL                                                                                                                                  |
| Cellular Component | GO:0001740 | Barr body                                           | 1/2341  | 6/19559   | 0.5346593 | 0.788062 | 0.7065383 | 1  | MACROH2A2                                                                                                                            |
| Cellular Component | GO:0005642 | annulate lamellae                                   | 1/2341  | 6/19559   | 0.5346593 | 0.788062 | 0.7065383 | 1  | BICD2                                                                                                                                |
| Cellular Component | GO:0005787 | signal peptidase complex                            | 1/2341  | 6/19559   | 0.5346593 | 0.788062 | 0.7065383 | 1  | SPCS1                                                                                                                                |
| Cellular Component | GO:0005851 | eukaryotic translation initiation factor 2B complex | 1/2341  | 6/19559   | 0.5346593 | 0.788062 | 0.7065383 | 1  | EIF2B5                                                                                                                               |

|                    |            |                                                       |        |         |           |          |           |   |        |
|--------------------|------------|-------------------------------------------------------|--------|---------|-----------|----------|-----------|---|--------|
| Cellular Component | GO:0030062 | mitochondrial tricarboxylic acid cycle enzyme complex | 1/2341 | 6/19559 | 0.5346593 | 0.788062 | 0.7065383 | 1 | BCKDHA |
| Cellular Component | GO:0030430 | host cell cytoplasm                                   | 1/2341 | 6/19559 | 0.5346593 | 0.788062 | 0.7065383 | 1 | AQP1   |
| Cellular Component | GO:0031088 | platelet dense granule membrane                       | 1/2341 | 6/19559 | 0.5346593 | 0.788062 | 0.7065383 | 1 | ITPR1  |
| Cellular Component | GO:0031166 | integral component of vacuolar membrane               | 1/2341 | 6/19559 | 0.5346593 | 0.788062 | 0.7065383 | 1 | NPC1   |
| Cellular Component | GO:0031265 | CD95 death-inducing signaling complex                 | 1/2341 | 6/19559 | 0.5346593 | 0.788062 | 0.7065383 | 1 | FADD   |
| Cellular Component | GO:0031310 | intrinsic component of vacuolar membrane              | 1/2341 | 6/19559 | 0.5346593 | 0.788062 | 0.7065383 | 1 | NPC1   |
| Cellular Component | GO:0033165 | interphotoreceptor matrix                             | 1/2341 | 6/19559 | 0.5346593 | 0.788062 | 0.7065383 | 1 | EYS    |
| Cellular Component | GO:0033655 | host cell cytoplasm part                              | 1/2341 | 6/19559 | 0.5346593 | 0.788062 | 0.7065383 | 1 | AQP1   |
| Cellular Component | GO:0034715 | pICln-Sm protein complex                              | 1/2341 | 6/19559 | 0.5346593 | 0.788062 | 0.7065383 | 1 | SNRPD3 |

|                    |            |                                                                          |        |         |           |          |           |   |         |
|--------------------|------------|--------------------------------------------------------------------------|--------|---------|-----------|----------|-----------|---|---------|
| Cellular Component | GO:0035748 | myelin sheath abaxonal region                                            | 1/2341 | 6/19559 | 0.5346593 | 0.788062 | 0.7065383 | 1 | PRKCZ   |
| Cellular Component | GO:0043190 | ATP-binding cassette (ABC) transporter complex                           | 1/2341 | 6/19559 | 0.5346593 | 0.788062 | 0.7065383 | 1 | ABCB8   |
| Cellular Component | GO:0045252 | oxoglutarate dehydrogenase complex                                       | 1/2341 | 6/19559 | 0.5346593 | 0.788062 | 0.7065383 | 1 | OGDH    |
| Cellular Component | GO:0046581 | intercellular canaliculus                                                | 1/2341 | 6/19559 | 0.5346593 | 0.788062 | 0.7065383 | 1 | ABCC2   |
| Cellular Component | GO:0071204 | histone pre-mRNA 3'end processing complex                                | 1/2341 | 6/19559 | 0.5346593 | 0.788062 | 0.7065383 | 1 | SYNCRIP |
| Cellular Component | GO:0071458 | integral component of cytoplasmic side of endoplasmic reticulum membrane | 1/2341 | 6/19559 | 0.5346593 | 0.788062 | 0.7065383 | 1 | HM13    |
| Cellular Component | GO:0097136 | Bcl-2 family protein complex                                             | 1/2341 | 6/19559 | 0.5346593 | 0.788062 | 0.7065383 | 1 | BCL2L1  |
| Cellular Component | GO:1990075 | periciliary membrane compartment                                         | 1/2341 | 6/19559 | 0.5346593 | 0.788062 | 0.7065383 | 1 | KIFAP3  |
| Cellular Component | GO:1990130 | GATOR1 complex                                                           | 1/2341 | 6/19559 | 0.5346593 | 0.788062 | 0.7065383 | 1 | NPRL2   |

|                    |            |                                                |         |           |           |           |           |    |                                                                                                                                                                                                                                                                                               |                                                                                                                   |
|--------------------|------------|------------------------------------------------|---------|-----------|-----------|-----------|-----------|----|-----------------------------------------------------------------------------------------------------------------------------------------------------------------------------------------------------------------------------------------------------------------------------------------------|-------------------------------------------------------------------------------------------------------------------|
| Cellular Component | GO:1990742 | microvesicle                                   | 1/2341  | 6/19559   | 0.5346593 | 0.788062  | 0.7065383 | 1  |                                                                                                                                                                                                                                                                                               | DEFB1                                                                                                             |
| Cellular Component | GO:0031968 | organelle outer membrane                       | 26/2341 | 218/19559 | 0.5391906 | 0.7937324 | 0.7116221 | 26 | VAT1/HK1/ACSL1/ITPRIP/ULK1/SYNE1/BMF/SLC11A2/NAV3/AIFM2/HK2/ACACB/MSTO1/IMMT/FIS1/BCL2/DNM1L/MIEF1/BCL2L1/CPT1A/LPIN1/AGPAT5/SPART/STING1/STMP1/MTARC1                                                                                                                                        |                                                                                                                   |
| Cellular Component | GO:0030140 | trans-Golgi network transport vesicle          | 4/2341  | 32/19559  | 0.5435714 | 0.7959541 | 0.7136141 | 4  |                                                                                                                                                                                                                                                                                               | AP2A1/SORT1/AP1G2/CLTCL1                                                                                          |
| Cellular Component | GO:0097060 | synaptic membrane                              | 46/2341 | 387/19559 | 0.5440288 | 0.7959541 | 0.7136141 | 46 | NRP2/SORCS2/CADM3/SLC16A3/SYNE1/DENND1A/CACNA1C/SLC8A1/ARRB1/DNM2/ITSN1/ATP2B2/COMT/ERC1/BAIAP2/GRIK4/CNIH2/HTR3A/NRXN1/SLC1A2/ITGB3/CHRM2/ZDHC17/SLC1A6/PALM/GSG1L/ARRB2/DNM1/PI4K2A/DNM3/GABBR1/RPH3A/P2RX1/DNM1L/SHANK2/F2R/CNTNAP1/GABBR2/PDLIM4/ANK2/MX1/GRID1/DTNBP1/DBNL/LRFN2/NECTIN1 |                                                                                                                   |
| Cellular Component | GO:0005814 | centriole                                      | 17/2341 | 143/19559 | 0.5505969 | 0.7959541 | 0.7136141 | 17 |                                                                                                                                                                                                                                                                                               | DCTN1/KIAA0586/CAPG/CEP135/POC1A/CEP164/CCDC92/CEP78/HTT/IFT140/SDCCAG8/RILPL1/HYLS1/AGBL2/CEP350/CEP295NL/CIBAR2 |
| Cellular Component | GO:0001673 | male germ cell nucleus                         | 2/2341  | 15/19559  | 0.5509924 | 0.7959541 | 0.7136141 | 2  |                                                                                                                                                                                                                                                                                               | TCFL5/MORC1                                                                                                       |
| Cellular Component | GO:0005639 | integral component of nuclear inner membrane   | 2/2341  | 15/19559  | 0.5509924 | 0.7959541 | 0.7136141 | 2  |                                                                                                                                                                                                                                                                                               | P2RX1/P2RX5                                                                                                       |
| Cellular Component | GO:0005671 | Ada2/Gcn5/Ada3 transcription activator complex | 2/2341  | 15/19559  | 0.5509924 | 0.7959541 | 0.7136141 | 2  |                                                                                                                                                                                                                                                                                               | UBAP2L/POLE4                                                                                                      |
| Cellular Component | GO:0010369 | chromocenter                                   | 2/2341  | 15/19559  | 0.5509924 | 0.7959541 | 0.7136141 | 2  |                                                                                                                                                                                                                                                                                               | MBD6/MBD5                                                                                                         |



|                    |            |                                                    |         |           |           |           |           |    |                                                                                                                                                                      |                |
|--------------------|------------|----------------------------------------------------|---------|-----------|-----------|-----------|-----------|----|----------------------------------------------------------------------------------------------------------------------------------------------------------------------|----------------|
| Cellular Component | GO:0030673 | axolemma                                           | 2/2341  | 15/19559  | 0.5509924 | 0.7959541 | 0.7136141 | 2  |                                                                                                                                                                      | EPB41L3/SLC1A2 |
| Cellular Component | GO:0031083 | BLOC-1 complex                                     | 2/2341  | 15/19559  | 0.5509924 | 0.7959541 | 0.7136141 | 2  |                                                                                                                                                                      | PI4K2A/DTNBP1  |
| Cellular Component | GO:0031229 | intrinsic component of nuclear inner membrane      | 2/2341  | 15/19559  | 0.5509924 | 0.7959541 | 0.7136141 | 2  |                                                                                                                                                                      | P2RX1/P2RX5    |
| Cellular Component | GO:0031616 | spindle pole centrosome                            | 2/2341  | 15/19559  | 0.5509924 | 0.7959541 | 0.7136141 | 2  |                                                                                                                                                                      | NDE1/NUMA1     |
| Cellular Component | GO:0033290 | eukaryotic 48S preinitiation complex               | 2/2341  | 15/19559  | 0.5509924 | 0.7959541 | 0.7136141 | 2  |                                                                                                                                                                      | EIF3M/EIF3H    |
| Cellular Component | GO:0098554 | cytoplasmic side of endoplasmic reticulum membrane | 2/2341  | 15/19559  | 0.5509924 | 0.7959541 | 0.7136141 | 2  |                                                                                                                                                                      | THADA/HM13     |
| Cellular Component | GO:0098831 | presynaptic active zone cytoplasmic component      | 2/2341  | 15/19559  | 0.5509924 | 0.7959541 | 0.7136141 | 2  |                                                                                                                                                                      | CTBP1/CTBP2    |
| Cellular Component | GO:0098845 | postsynaptic endosome                              | 2/2341  | 15/19559  | 0.5509924 | 0.7959541 | 0.7136141 | 2  |                                                                                                                                                                      | ZDHHC2/AKAP5   |
| Cellular Component | GO:0032838 | plasma membrane bounded cell projection cytoplasm  | 25/2341 | 211/19559 | 0.5536111 | 0.7977827 | 0.7152534 | 25 | DNAH3/SPG7/DYNC1H1/SPAG6/DNAJB13/BAIAP2/ATG14/CCIN/KIF5C/IFT140/INPP5E/KIF1B/RPGRI1/MAP1A/KIFAP3/AP3D1/DNAI2/FBXW11/NDEL1/DTNBP1/SPEF1/SEPTIN9/CFAP221/CFAP61/CFAP46 |                |

|                    |            |                                                                           |         |           |           |           |           |    |                                                                                                                                                                                                                                                                                                                                                            |
|--------------------|------------|---------------------------------------------------------------------------|---------|-----------|-----------|-----------|-----------|----|------------------------------------------------------------------------------------------------------------------------------------------------------------------------------------------------------------------------------------------------------------------------------------------------------------------------------------------------------------|
| Cellular Component | GO:0016592 | mediator complex                                                          | 5/2341  | 41/19559  | 0.5536337 | 0.7977827 | 0.7152534 | 5  | MED13L/MED13/MED8/MED25/MED12L                                                                                                                                                                                                                                                                                                                             |
| Cellular Component | GO:0005759 | mitochondrial matrix                                                      | 56/2341 | 473/19559 | 0.5567049 | 0.8011361 | 0.7182599 | 56 | ACAD8/CREB1/BDH1/MRPL3/PAM16/D2HGDH/TOP1MT/MTHFD1L/ALDH2/NMNAT3/MIPEP/ACP6/LRRC59/DHTKD1/MTHFS/CARS2/MRPL38/OGDH/NDUFS2/ALDH4A1/FECH/TK2/ACSS1/PC/FDX1/MTG2/ACADM/NDUFS8/HIBADH/AGXT/ALAS1/ACSS2/HOGA1/BCKDHA/MRPS21/MRPS26/ACSF3/TIMM44/HMGCL/GLRX2/MRPL28/PCK2/ACAT1/BCL2L1/EARS2/ACSS3/PTCD1/CASQ1/TXNRD2/SIRT3/TBRG4/SDHAF1/ACADVL/GRSF1/SDHAF3/DGLUCY |
| Cellular Component | GO:0005791 | rough endoplasmic reticulum                                               | 10/2341 | 84/19559  | 0.5574995 | 0.8011361 | 0.7182599 | 10 | RPN1/SFTPD/HM13/BAIAP2/APP/DERL2/F12/CDKAL1/ARSB/PKM                                                                                                                                                                                                                                                                                                       |
| Cellular Component | GO:0019867 | outer membrane                                                            | 26/2341 | 220/19559 | 0.5589444 | 0.8011361 | 0.7182599 | 26 | VAT1/HK1/ACSL1/ITPRIP/ULK1/SYNE1/BMF/SLC11A2/NAV3/AIFM2/HK2/ACACB/MSTO1/IMMT/FIS1/BCL2/DNM1L/MIEF1/BCL2L1/CPT1A/LPIN1/AGPAT5/SPART/STING1/STMP1/MTARC1                                                                                                                                                                                                     |
| Cellular Component | GO:0034704 | calcium channel complex                                                   | 8/2341  | 67/19559  | 0.5590658 | 0.8011361 | 0.7182599 | 8  | PDE4D/CASQ2/CACNA1C/CACNA2D4/PKD1L1/NOS1AP/CACNA1B/PTPA                                                                                                                                                                                                                                                                                                    |
| Cellular Component | GO:0031233 | intrinsic component of external side of plasma membrane                   | 3/2341  | 24/19559  | 0.5607952 | 0.8011361 | 0.7182599 | 3  | FOLR3/CD59/CEACAM5                                                                                                                                                                                                                                                                                                                                         |
| Cellular Component | GO:0033177 | proton-transporting two-sector ATPase complex, proton-transporting domain | 3/2341  | 24/19559  | 0.5607952 | 0.8011361 | 0.7182599 | 3  | ATP6V0B/ATP5PD/ATP6V0C                                                                                                                                                                                                                                                                                                                                     |
| Cellular Component | GO:0098533 | ATPase dependent transmembrane transport complex                          | 3/2341  | 24/19559  | 0.5607952 | 0.8011361 | 0.7182599 | 3  | FXYD2/FXYD1/ABC8                                                                                                                                                                                                                                                                                                                                           |
| Cellular Component | GO:0005684 | U2-type spliceosomal complex                                              | 11/2341 | 93/19559  | 0.5645567 | 0.8055176 | 0.7221882 | 11 | SNRPD3/SF3B3/LSM7/PRPF8/CCDC12/DHX16/PRPF6/PRPF40B/PLRG1/SRRM2/TFIP11                                                                                                                                                                                                                                                                                      |

|                    |            |                                                              |        |          |           |           |           |   |                                            |
|--------------------|------------|--------------------------------------------------------------|--------|----------|-----------|-----------|-----------|---|--------------------------------------------|
| Cellular Component | GO:0032421 | stereocilium bundle                                          | 7/2341 | 59/19559 | 0.5697376 | 0.811911  | 0.7279202 | 7 | CDH23/ATP8B1/ESPN/TSPEAR/TMC1/MYO1C/CDC14A |
| Cellular Component | GO:0000795 | synaptonemal complex                                         | 5/2341 | 42/19559 | 0.5759054 | 0.8143071 | 0.7300684 | 5 | BLM/BRCA2/RNF212/RAD21L1/TEX12             |
| Cellular Component | GO:0099086 | synaptonemal structure                                       | 5/2341 | 42/19559 | 0.5759054 | 0.8143071 | 0.7300684 | 5 | BLM/BRCA2/RNF212/RAD21L1/TEX12             |
| Cellular Component | GO:0044233 | mitochondria-associated<br>endoplasmic reticulum<br>membrane | 2/2341 | 16/19559 | 0.5870743 | 0.8143071 | 0.7300684 | 2 | ATG14/PDZD8                                |
| Cellular Component | GO:0071437 | invadopodium                                                 | 2/2341 | 16/19559 | 0.5870743 | 0.8143071 | 0.7300684 | 2 | SVIL/EZR                                   |
| Cellular Component | GO:0098688 | parallel fiber to Purkinje cell<br>synapse                   | 2/2341 | 16/19559 | 0.5870743 | 0.8143071 | 0.7300684 | 2 | CADM3/SLC16A3                              |
| Cellular Component | GO:0042611 | MHC protein complex                                          | 3/2341 | 25/19559 | 0.5894598 | 0.8143071 | 0.7300684 | 3 | HLA-DMB/HLA-C/HLA-F                        |
| Cellular Component | GO:0001534 | radial spoke                                                 | 1/2341 | 7/19559  | 0.5903726 | 0.8143071 | 0.7300684 | 1 | CFAP61                                     |
| Cellular Component | GO:0005587 | collagen type IV trimer                                      | 1/2341 | 7/19559  | 0.5903726 | 0.8143071 | 0.7300684 | 1 | COL4A2                                     |

|                    |            |                                                |        |         |           |           |           |   |         |
|--------------------|------------|------------------------------------------------|--------|---------|-----------|-----------|-----------|---|---------|
| Cellular Component | GO:0005683 | U7 snRNP                                       | 1/2341 | 7/19559 | 0.5903726 | 0.8143071 | 0.7300684 | 1 | SNRPD3  |
| Cellular Component | GO:0005785 | signal recognition particle receptor complex   | 1/2341 | 7/19559 | 0.5903726 | 0.8143071 | 0.7300684 | 1 | DERL2   |
| Cellular Component | GO:0008541 | proteasome regulatory particle, lid subcomplex | 1/2341 | 7/19559 | 0.5903726 | 0.8143071 | 0.7300684 | 1 | PSMD13  |
| Cellular Component | GO:0030056 | hemidesmosome                                  | 1/2341 | 7/19559 | 0.5903726 | 0.8143071 | 0.7300684 | 1 | COL17A1 |
| Cellular Component | GO:0030121 | AP-1 adaptor complex                           | 1/2341 | 7/19559 | 0.5903726 | 0.8143071 | 0.7300684 | 1 | AP1G2   |
| Cellular Component | GO:0030314 | junctional membrane complex                    | 1/2341 | 7/19559 | 0.5903726 | 0.8143071 | 0.7300684 | 1 | CASQ2   |
| Cellular Component | GO:0030868 | smooth endoplasmic reticulum membrane          | 1/2341 | 7/19559 | 0.5903726 | 0.8143071 | 0.7300684 | 1 | SVIP    |
| Cellular Component | GO:0030870 | Mre11 complex                                  | 1/2341 | 7/19559 | 0.5903726 | 0.8143071 | 0.7300684 | 1 | SP100   |
| Cellular Component | GO:0030893 | meiotic cohesin complex                        | 1/2341 | 7/19559 | 0.5903726 | 0.8143071 | 0.7300684 | 1 | RAD21L1 |

|                    |            |                                    |        |         |           |           |           |   |         |
|--------------------|------------|------------------------------------|--------|---------|-----------|-----------|-----------|---|---------|
| Cellular Component | GO:0030915 | Smc5-Smc6 complex                  | 1/2341 | 7/19559 | 0.5903726 | 0.8143071 | 0.7300684 | 1 | NSMCE2  |
| Cellular Component | GO:0031428 | box C/D snoRNP complex             | 1/2341 | 7/19559 | 0.5903726 | 0.8143071 | 0.7300684 | 1 | FBL     |
| Cellular Component | GO:0042105 | alpha-beta T cell receptor complex | 1/2341 | 7/19559 | 0.5903726 | 0.8143071 | 0.7300684 | 1 | PTPN6   |
| Cellular Component | GO:0044326 | dendritic spine neck               | 1/2341 | 7/19559 | 0.5903726 | 0.8143071 | 0.7300684 | 1 | PPP1R1B |
| Cellular Component | GO:0070761 | pre-snoRNP complex                 | 1/2341 | 7/19559 | 0.5903726 | 0.8143071 | 0.7300684 | 1 | PIH1D1  |
| Cellular Component | GO:0070852 | cell body fiber                    | 1/2341 | 7/19559 | 0.5903726 | 0.8143071 | 0.7300684 | 1 | SPTBN4  |
| Cellular Component | GO:0071546 | pi-body                            | 1/2341 | 7/19559 | 0.5903726 | 0.8143071 | 0.7300684 | 1 | MOV10L1 |
| Cellular Component | GO:0097208 | alveolar lamellar body             | 1/2341 | 7/19559 | 0.5903726 | 0.8143071 | 0.7300684 | 1 | CTSH    |
| Cellular Component | GO:0097486 | multivesicular body lumen          | 1/2341 | 7/19559 | 0.5903726 | 0.8143071 | 0.7300684 | 1 | CTSH    |

|                    |            |                                                 |         |           |           |           |           |    |                                                                                                                       |
|--------------------|------------|-------------------------------------------------|---------|-----------|-----------|-----------|-----------|----|-----------------------------------------------------------------------------------------------------------------------|
| Cellular Component | GO:0120115 | Lsm2-8 complex                                  | 1/2341  | 7/19559   | 0.5903726 | 0.8143071 | 0.7300684 | 1  | LSM7                                                                                                                  |
| Cellular Component | GO:0005719 | nuclear euchromatin                             | 4/2341  | 34/19559  | 0.5933013 | 0.8160009 | 0.731587  | 4  | CECR2/CREB1/ASH2L/TCF3                                                                                                |
| Cellular Component | GO:0030285 | integral component of synaptic vesicle membrane | 4/2341  | 34/19559  | 0.5933013 | 0.8160009 | 0.731587  | 4  | SV2C/ATP8A1/PTPRN2/TMEM163                                                                                            |
| Cellular Component | GO:0005844 | polysome                                        | 8/2341  | 69/19559  | 0.593711  | 0.8160009 | 0.731587  | 8  | CALR/AGO1/HDLBP/LARP1/AGO2/DIS3L2/EIF3H/EIF4G1                                                                        |
| Cellular Component | GO:0005891 | voltage-gated calcium channel complex           | 5/2341  | 43/19559  | 0.5975751 | 0.8203398 | 0.7354771 | 5  | PDE4D/CACNA1C/CACNA2D4/NOS1AP/CACNA1B                                                                                 |
| Cellular Component | GO:0016469 | proton-transporting two-sector ATPase complex   | 6/2341  | 52/19559  | 0.6019437 | 0.8249087 | 0.7395734 | 6  | ATP6V1B2/ATP6V0B/ATP5PD/ATP6V0C/ATP6V1C1/ATP5MPL                                                                      |
| Cellular Component | GO:0042734 | presynaptic membrane                            | 18/2341 | 156/19559 | 0.6030367 | 0.8249087 | 0.7395734 | 18 | CADM3/DENND1A/ITSN1/ERC1/GRIK4/HTR3A/NRXN1/SLC1A2/CHRM2/ZDHHC17/SLC1A6/DNM1/PI4K2A/GABBR1/P2RX1/DNM1L/CNTNAP1/NECTIN1 |
| Cellular Component | GO:0043204 | perikaryon                                      | 18/2341 | 156/19559 | 0.6030367 | 0.8249087 | 0.7395734 | 18 | TRPM2/CPNE6/RCVRN/SORCS2/CACNA1C/CCR2/CPNE5/BRD1/APP/CRHBP/CNR2/PDE9A/PI4K2A/ASTN2/RBFOX3/SYNPO/DBNL/TMEM266          |
| Cellular Component | GO:0005930 | axoneme                                         | 14/2341 | 122/19559 | 0.6086524 | 0.8316099 | 0.7455813 | 14 | DNAH3/SPAG6/DNAJB13/ATG14/IFT140/INPP5E/RPGRIP1/KIFAP3/DNAI2/SPEF1/SEPTIN9/CFAP221/CFAP61/CFAP46                      |

|                    |            |                                          |         |           |           |           |           |    |                                                                                                 |
|--------------------|------------|------------------------------------------|---------|-----------|-----------|-----------|-----------|----|-------------------------------------------------------------------------------------------------|
| Cellular Component | GO:0002080 | acrosomal membrane                       | 3/2341  | 26/19559  | 0.6168877 | 0.8416334 | 0.7545679 | 3  | BSG/ACRBP/PLA1A                                                                                 |
| Cellular Component | GO:0000778 | condensed nuclear chromosome kinetochore | 2/2341  | 17/19559  | 0.6209553 | 0.8416334 | 0.7545679 | 2  | MIS12/PEL1                                                                                      |
| Cellular Component | GO:0016282 | eukaryotic 43S preinitiation complex     | 2/2341  | 17/19559  | 0.6209553 | 0.8416334 | 0.7545679 | 2  | EIF3M/EIF3H                                                                                     |
| Cellular Component | GO:0035859 | Seh1-associated complex                  | 2/2341  | 17/19559  | 0.6209553 | 0.8416334 | 0.7545679 | 2  | SEC13/NPRL2                                                                                     |
| Cellular Component | GO:0071004 | U2-type prespliceosome                   | 2/2341  | 17/19559  | 0.6209553 | 0.8416334 | 0.7545679 | 2  | LSM7/PRPF40B                                                                                    |
| Cellular Component | GO:0071010 | prespliceosome                           | 2/2341  | 17/19559  | 0.6209553 | 0.8416334 | 0.7545679 | 2  | LSM7/PRPF40B                                                                                    |
| Cellular Component | GO:0030286 | dynein complex                           | 6/2341  | 53/19559  | 0.6210674 | 0.8416334 | 0.7545679 | 6  | DCTN1/DNAH3/DYNC1H1/DISC1/DCTN2/DNAI2                                                           |
| Cellular Component | GO:0005758 | mitochondrial intermembrane space        | 9/2341  | 80/19559  | 0.6301065 | 0.8422381 | 0.75511   | 9  | COX19/FGR/CHCHD5/CAT/IMMT/PPOX/AK2/SDHAF3/STMP1                                                 |
| Cellular Component | GO:0097014 | ciliary plasm                            | 14/2341 | 124/19559 | 0.6336383 | 0.8422381 | 0.75511   | 14 | DNAH3/SPAG6/DNAJB13/ATG14/IFT140/INPP5E/RPGRI1/KIFAP3/DNAI2/SPEF1/SEPTIN9/CFAP221/CFAP61/CFAP46 |

|                    |            |                                                                                |         |           |           |           |         |    |                                                                                                                                                                                                  |
|--------------------|------------|--------------------------------------------------------------------------------|---------|-----------|-----------|-----------|---------|----|--------------------------------------------------------------------------------------------------------------------------------------------------------------------------------------------------|
| Cellular Component | GO:0045211 | postsynaptic membrane                                                          | 32/2341 | 280/19559 | 0.6380691 | 0.8422381 | 0.75511 | 32 | NRP2/SORCS2/SLC16A3/SYNE1/CACNA1C/SLC8A1/ARRB1/DNM2/ATP2B2/COMT/GRIK4/CNIH2/HTR3A/ITGB3/CHRM2/GSG1L/ARRB2/DNM1/DNM3/GABBR1/RPH3A/P2RX1/SHANK2/F2R/GABBR2/PDLIM4/ANK2/MX1/GRID1/DTNBP1/DBNL/LRFN2 |
| Cellular Component | GO:0000506 | glycosylphosphatidylinositol-N-acetylglucosaminyltransferase (GPI-GnT) complex | 1/2341  | 8/19559   | 0.6394181 | 0.8422381 | 0.75511 | 1  | PIGQ                                                                                                                                                                                             |
| Cellular Component | GO:0000801 | central element                                                                | 1/2341  | 8/19559   | 0.6394181 | 0.8422381 | 0.75511 | 1  | TEX12                                                                                                                                                                                            |
| Cellular Component | GO:0005577 | fibrinogen complex                                                             | 1/2341  | 8/19559   | 0.6394181 | 0.8422381 | 0.75511 | 1  | THBS1                                                                                                                                                                                            |
| Cellular Component | GO:0031232 | extrinsic component of external side of plasma membrane                        | 1/2341  | 8/19559   | 0.6394181 | 0.8422381 | 0.75511 | 1  | FCN1                                                                                                                                                                                             |
| Cellular Component | GO:0034366 | spherical high-density lipoprotein particle                                    | 1/2341  | 8/19559   | 0.6394181 | 0.8422381 | 0.75511 | 1  | CLU                                                                                                                                                                                              |
| Cellular Component | GO:0036396 | RNA N6-methyladenosine methyltransferase complex                               | 1/2341  | 8/19559   | 0.6394181 | 0.8422381 | 0.75511 | 1  | RBM15B                                                                                                                                                                                           |
| Cellular Component | GO:0042824 | MHC class I peptide loading complex                                            | 1/2341  | 8/19559   | 0.6394181 | 0.8422381 | 0.75511 | 1  | CALR                                                                                                                                                                                             |
| Cellular Component | GO:0044352 | pinosome                                                                       | 1/2341  | 8/19559   | 0.6394181 | 0.8422381 | 0.75511 | 1  | ANKFY1                                                                                                                                                                                           |



|                    |            |                                    |        |         |           |           |         |   |        |
|--------------------|------------|------------------------------------|--------|---------|-----------|-----------|---------|---|--------|
| Cellular Component | GO:0044354 | macropinosome                      | 1/2341 | 8/19559 | 0.6394181 | 0.8422381 | 0.75511 | 1 | ANKFY1 |
| Cellular Component | GO:0045293 | mRNA editing complex               | 1/2341 | 8/19559 | 0.6394181 | 0.8422381 | 0.75511 | 1 | RBM15B |
| Cellular Component | GO:0061673 | mitotic spindle astral microtubule | 1/2341 | 8/19559 | 0.6394181 | 0.8422381 | 0.75511 | 1 | NUMA1  |
| Cellular Component | GO:0070847 | core mediator complex              | 1/2341 | 8/19559 | 0.6394181 | 0.8422381 | 0.75511 | 1 | MED8   |
| Cellular Component | GO:0097450 | astrocyte end-foot                 | 1/2341 | 8/19559 | 0.6394181 | 0.8422381 | 0.75511 | 1 | MLC1   |
| Cellular Component | GO:0098642 | network-forming collagen trimer    | 1/2341 | 8/19559 | 0.6394181 | 0.8422381 | 0.75511 | 1 | COL4A2 |
| Cellular Component | GO:0098645 | collagen network                   | 1/2341 | 8/19559 | 0.6394181 | 0.8422381 | 0.75511 | 1 | COL4A2 |
| Cellular Component | GO:0099571 | postsynaptic cytoskeleton          | 1/2341 | 8/19559 | 0.6394181 | 0.8422381 | 0.75511 | 1 | ITSN1  |
| Cellular Component | GO:0106068 | SUMO ligase complex                | 1/2341 | 8/19559 | 0.6394181 | 0.8422381 | 0.75511 | 1 | NSMCE2 |

|                    |            |                                  |        |          |           |           |           |   |                                              |
|--------------------|------------|----------------------------------|--------|----------|-----------|-----------|-----------|---|----------------------------------------------|
| Cellular Component | GO:1990316 | Atg1/ULK1 kinase complex         | 1/2341 | 8/19559  | 0.6394181 | 0.8422381 | 0.75511   | 1 | ULK1                                         |
| Cellular Component | GO:1990712 | HFE-transferrin receptor complex | 1/2341 | 8/19559  | 0.6394181 | 0.8422381 | 0.75511   | 1 | BMPR1B                                       |
| Cellular Component | GO:0034358 | plasma lipoprotein particle      | 4/2341 | 36/19559 | 0.6396653 | 0.8422381 | 0.75511   | 4 | LIPC/HDLBP/PLTP/CLU                          |
| Cellular Component | GO:0051233 | spindle midzone                  | 4/2341 | 36/19559 | 0.6396653 | 0.8422381 | 0.75511   | 4 | CTDP1/CTTN/APP/NUMA1                         |
| Cellular Component | GO:1990777 | lipoprotein particle             | 4/2341 | 36/19559 | 0.6396653 | 0.8422381 | 0.75511   | 4 | LIPC/HDLBP/PLTP/CLU                          |
| Cellular Component | GO:0019005 | SCF ubiquitin ligase complex     | 7/2341 | 63/19559 | 0.6411087 | 0.8431815 | 0.7559559 | 7 | FBXO7/FBXL19/FBXL13/FBXL18/FBXL6/FBXW11/FBH1 |
| Cellular Component | GO:0030990 | intraciliary transport particle  | 3/2341 | 27/19559 | 0.6430448 | 0.8438144 | 0.7565233 | 3 | CLUAP1/IFT140/TTC21B                         |
| Cellular Component | GO:0031045 | dense core granule               | 3/2341 | 27/19559 | 0.6430448 | 0.8438144 | 0.7565233 | 3 | MYRIP/CRHBP/NPY                              |
| Cellular Component | GO:0031527 | filopodium membrane              | 2/2341 | 18/19559 | 0.6526452 | 0.8525545 | 0.7643592 | 2 | ITGB3/PALM                                   |

|                    |            |                                                                 |        |          |           |           |           |   |                                                           |
|--------------------|------------|-----------------------------------------------------------------|--------|----------|-----------|-----------|-----------|---|-----------------------------------------------------------|
| Cellular Component | GO:0033178 | proton-transporting two-sector ATPase complex, catalytic domain | 2/2341 | 18/19559 | 0.6526452 | 0.8525545 | 0.7643592 | 2 | ATP6V1B2/ATP6V1C1                                         |
| Cellular Component | GO:0070993 | translation preinitiation complex                               | 2/2341 | 18/19559 | 0.6526452 | 0.8525545 | 0.7643592 | 2 | EIF3M/EIF3H                                               |
| Cellular Component | GO:0090533 | cation-transporting ATPase complex                              | 2/2341 | 18/19559 | 0.6526452 | 0.8525545 | 0.7643592 | 2 | FXD2/FXD1                                                 |
| Cellular Component | GO:0005640 | nuclear outer membrane                                          | 3/2341 | 28/19559 | 0.6679129 | 0.861921  | 0.7727568 | 3 | ITPRIP/SYNE1/NAV3                                         |
| Cellular Component | GO:0018995 | host cellular component                                         | 7/2341 | 65/19559 | 0.6740829 | 0.861921  | 0.7727568 | 7 | RAE1/AQP1/NUP93/SEC13/PI4KA/MVB12A/SHFL                   |
| Cellular Component | GO:0043657 | host cell                                                       | 7/2341 | 65/19559 | 0.6740829 | 0.861921  | 0.7727568 | 7 | RAE1/AQP1/NUP93/SEC13/PI4KA/MVB12A/SHFL                   |
| Cellular Component | GO:0098889 | intrinsic component of presynaptic membrane                     | 9/2341 | 83/19559 | 0.6743742 | 0.861921  | 0.7727568 | 9 | CADM3/GRIK4/HTR3A/NRXN1/SLC1A2/CHRM2/SLC1A6/P2RX1/NECTIN1 |
| Cellular Component | GO:0008023 | transcription elongation factor complex                         | 6/2341 | 56/19559 | 0.675149  | 0.861921  | 0.7727568 | 6 | AFF1/ELL2/ZC3H8/MLLT1/RB1/CDK13                           |
| Cellular Component | GO:0031519 | PcG protein complex                                             | 5/2341 | 47/19559 | 0.6776227 | 0.861921  | 0.7727568 | 5 | PHC2/PHC3/PHF19/UBAP2L/PCGF3                              |

|                    |            |                                                        |        |          |           |          |           |   |                                  |
|--------------------|------------|--------------------------------------------------------|--------|----------|-----------|----------|-----------|---|----------------------------------|
| Cellular Component | GO:0098563 | intrinsic component of synaptic vesicle membrane       | 5/2341 | 47/19559 | 0.6776227 | 0.861921 | 0.7727568 | 5 | SV2C/RAB5B/ATP8A1/PTPRN2/TMEM163 |
| Cellular Component | GO:0031362 | anchored component of external side of plasma membrane | 2/2341 | 19/19559 | 0.6821828 | 0.861921 | 0.7727568 | 2 | FOLR3/CD59                       |
| Cellular Component | GO:0034719 | SMN-Sm protein complex                                 | 2/2341 | 19/19559 | 0.6821828 | 0.861921 | 0.7727568 | 2 | SNRPD3/GEMIN4                    |
| Cellular Component | GO:0043073 | germ cell nucleus                                      | 2/2341 | 19/19559 | 0.6821828 | 0.861921 | 0.7727568 | 2 | TCFL5/MORC1                      |
| Cellular Component | GO:0089717 | spanning component of membrane                         | 2/2341 | 19/19559 | 0.6821828 | 0.861921 | 0.7727568 | 2 | SLC24A4/CDHR2                    |
| Cellular Component | GO:0000172 | ribonuclease MRP complex                               | 1/2341 | 9/19559  | 0.6825935 | 0.861921 | 0.7727568 | 1 | RMRP                             |
| Cellular Component | GO:0000808 | origin recognition complex                             | 1/2341 | 9/19559  | 0.6825935 | 0.861921 | 0.7727568 | 1 | MCM2                             |
| Cellular Component | GO:0001939 | female pronucleus                                      | 1/2341 | 9/19559  | 0.6825935 | 0.861921 | 0.7727568 | 1 | SLC2A1                           |
| Cellular Component | GO:0005664 | nuclear origin of replication recognition complex      | 1/2341 | 9/19559  | 0.6825935 | 0.861921 | 0.7727568 | 1 | MCM2                             |

|                    |            |                                            |        |         |           |          |           |   |        |
|--------------------|------------|--------------------------------------------|--------|---------|-----------|----------|-----------|---|--------|
| Cellular Component | GO:0005861 | troponin complex                           | 1/2341 | 9/19559 | 0.6825935 | 0.861921 | 0.7727568 | 1 | TNNT3  |
| Cellular Component | GO:0008385 | IkappaB kinase complex                     | 1/2341 | 9/19559 | 0.6825935 | 0.861921 | 0.7727568 | 1 | ERC1   |
| Cellular Component | GO:0014701 | junctional sarcoplasmic reticulum membrane | 1/2341 | 9/19559 | 0.6825935 | 0.861921 | 0.7727568 | 1 | CASQ2  |
| Cellular Component | GO:0014731 | spectrin-associated cytoskeleton           | 1/2341 | 9/19559 | 0.6825935 | 0.861921 | 0.7727568 | 1 | SPTA1  |
| Cellular Component | GO:0031906 | late endosome lumen                        | 1/2341 | 9/19559 | 0.6825935 | 0.861921 | 0.7727568 | 1 | CTSH   |
| Cellular Component | GO:0032437 | cuticular plate                            | 1/2341 | 9/19559 | 0.6825935 | 0.861921 | 0.7727568 | 1 | SPTA1  |
| Cellular Component | GO:0044294 | dendritic growth cone                      | 1/2341 | 9/19559 | 0.6825935 | 0.861921 | 0.7727568 | 1 | CYFIP1 |
| Cellular Component | GO:0045179 | apical cortex                              | 1/2341 | 9/19559 | 0.6825935 | 0.861921 | 0.7727568 | 1 | PRKCZ  |
| Cellular Component | GO:0060091 | kinocilium                                 | 1/2341 | 9/19559 | 0.6825935 | 0.861921 | 0.7727568 | 1 | CDC14A |

|                    |            |                                                    |         |           |           |           |           |    |  |                                                                                                 |
|--------------------|------------|----------------------------------------------------|---------|-----------|-----------|-----------|-----------|----|--|-------------------------------------------------------------------------------------------------|
| Cellular Component | GO:0061617 | MICOS complex                                      | 1/2341  | 9/19559   | 0.6825935 | 0.861921  | 0.7727568 | 1  |  | IMMT                                                                                            |
| Cellular Component | GO:0070419 | nonhomologous end joining complex                  | 1/2341  | 9/19559   | 0.6825935 | 0.861921  | 0.7727568 | 1  |  | PAXX                                                                                            |
| Cellular Component | GO:0090576 | RNA polymerase III transcription regulator complex | 1/2341  | 9/19559   | 0.6825935 | 0.861921  | 0.7727568 | 1  |  | BRF1                                                                                            |
| Cellular Component | GO:0097732 | 9+2 non-motile cilium                              | 1/2341  | 9/19559   | 0.6825935 | 0.861921  | 0.7727568 | 1  |  | CDC14A                                                                                          |
| Cellular Component | GO:0098651 | basement membrane collagen trimer                  | 1/2341  | 9/19559   | 0.6825935 | 0.861921  | 0.7727568 | 1  |  | COL4A2                                                                                          |
| Cellular Component | GO:0120103 | centriolar subdistal appendage                     | 1/2341  | 9/19559   | 0.6825935 | 0.861921  | 0.7727568 | 1  |  | DCTN1                                                                                           |
| Cellular Component | GO:0000776 | kinetochore                                        | 15/2341 | 137/19559 | 0.6828495 | 0.861921  | 0.7727568 | 15 |  | DCTN1/MAD1L1/NDE1/KANSL1/CHAMP1/MIS12/ZNF276/DCTN2/SEC13/TP53BP1/CENPM/SPAG5/FBXW11/NDEL1/PELI1 |
| Cellular Component | GO:0005876 | spindle microtubule                                | 7/2341  | 66/19559  | 0.6898394 | 0.8697975 | 0.7798185 | 7  |  | CSNK1D/CUL3/CDC16/PARP4/NUMA1/KLHL21/KIFAP3                                                     |
| Cellular Component | GO:0030686 | 90S preribosome                                    | 3/2341  | 29/19559  | 0.691488  | 0.8709296 | 0.7808334 | 3  |  | NOP14/NOL6/UTP4                                                                                 |

|                    |            |                                          |         |           |           |           |           |    |                                                                                      |
|--------------------|------------|------------------------------------------|---------|-----------|-----------|-----------|-----------|----|--------------------------------------------------------------------------------------|
| Cellular Component | GO:0031594 | neuromuscular junction                   | 8/2341  | 76/19559  | 0.7031336 | 0.8846366 | 0.7931225 | 8  | HDAC4/COLQ/MYH9/APP/DLGAP4/SNTA1/SYNGR3/F2R                                          |
| Cellular Component | GO:0005839 | proteasome core complex                  | 2/2341  | 20/19559  | 0.7096293 | 0.8879935 | 0.7961321 | 2  | PSMF1/PSMB7                                                                          |
| Cellular Component | GO:0005858 | axonemal dynein complex                  | 2/2341  | 20/19559  | 0.7096293 | 0.8879935 | 0.7961321 | 2  | DNAH3/DNAI2                                                                          |
| Cellular Component | GO:0016460 | myosin II complex                        | 2/2341  | 20/19559  | 0.7096293 | 0.8879935 | 0.7961321 | 2  | MYH11/MYH9                                                                           |
| Cellular Component | GO:0043186 | P granule                                | 2/2341  | 20/19559  | 0.7096293 | 0.8879935 | 0.7961321 | 2  | PIWIL4/MOV10L1                                                                       |
| Cellular Component | GO:0060293 | germ plasm                               | 2/2341  | 20/19559  | 0.7096293 | 0.8879935 | 0.7961321 | 2  | PIWIL4/MOV10L1                                                                       |
| Cellular Component | GO:0000779 | condensed chromosome, centromeric region | 13/2341 | 122/19559 | 0.713784  | 0.8911485 | 0.7989607 | 13 | MAD1L1/NDE1/KANSL1/CHAMP1/MIS12/ZNF276/RAD21L1/TP53BP1/CEBPB/CENPM/SPAG5/NDEL1/PELI1 |
| Cellular Component | GO:0000813 | ESCRT I complex                          | 1/2341  | 10/19559  | 0.7206011 | 0.8911485 | 0.7989607 | 1  | MVB12A                                                                               |
| Cellular Component | GO:0005797 | Golgi medial cisterna                    | 1/2341  | 10/19559  | 0.7206011 | 0.8911485 | 0.7989607 | 1  | YIPF1                                                                                |

|                    |            |                                              |        |          |           |           |           |   |                      |
|--------------------|------------|----------------------------------------------|--------|----------|-----------|-----------|-----------|---|----------------------|
| Cellular Component | GO:0005952 | cAMP-dependent protein kinase complex        | 1/2341 | 10/19559 | 0.7206011 | 0.8911485 | 0.7989607 | 1 | PRKAR1B              |
| Cellular Component | GO:0031080 | nuclear pore outer ring                      | 1/2341 | 10/19559 | 0.7206011 | 0.8911485 | 0.7989607 | 1 | SEC13                |
| Cellular Component | GO:0031313 | extrinsic component of endosome membrane     | 1/2341 | 10/19559 | 0.7206011 | 0.8911485 | 0.7989607 | 1 | WDR81                |
| Cellular Component | GO:0031414 | N-terminal protein acetyltransferase complex | 1/2341 | 10/19559 | 0.7206011 | 0.8911485 | 0.7989607 | 1 | NAA16                |
| Cellular Component | GO:0032593 | insulin-responsive compartment               | 1/2341 | 10/19559 | 0.7206011 | 0.8911485 | 0.7989607 | 1 | MYO5A                |
| Cellular Component | GO:0034663 | endoplasmic reticulum chaperone complex      | 1/2341 | 10/19559 | 0.7206011 | 0.8911485 | 0.7989607 | 1 | P4HB                 |
| Cellular Component | GO:0044754 | autolysosome                                 | 1/2341 | 10/19559 | 0.7206011 | 0.8911485 | 0.7989607 | 1 | NCOA4                |
| Cellular Component | GO:0097539 | ciliary transition fiber                     | 1/2341 | 10/19559 | 0.7206011 | 0.8911485 | 0.7989607 | 1 | CEP164               |
| Cellular Component | GO:0030669 | clathrin-coated endocytic vesicle membrane   | 4/2341 | 40/19559 | 0.7214939 | 0.8913023 | 0.7990986 | 4 | AP2A1/CD9/EPN2/EPS15 |



|                    |            |                                          |         |          |           |           |           |    |                                                               |
|--------------------|------------|------------------------------------------|---------|----------|-----------|-----------|-----------|----|---------------------------------------------------------------|
| Cellular Component | GO:0034705 | potassium channel complex                | 10/2341 | 96/19559 | 0.7265397 | 0.8956282 | 0.802977  | 10 | KCNE1/KCNAB2/CTTN/KCNN1/KCNQ2/NOS1AP/KCNIP1/GRIK4/KCNK6/KCNQ1 |
| Cellular Component | GO:0043202 | lysosomal lumen                          | 10/2341 | 96/19559 | 0.7265397 | 0.8956282 | 0.802977  | 10 | PLBD2/HEXB/GALNS/GALC/CTSD/SDC2/CTSB/ARSB/PLD3/PDGFRB         |
| Cellular Component | GO:0000792 | heterochromatin                          | 8/2341  | 78/19559 | 0.7305936 | 0.8975491 | 0.8046992 | 8  | BAZ1B/PHC2/EME1/UHRF1/HDAC1/KDM4C/DNMT1/RNF40                 |
| Cellular Component | GO:0030684 | preribosome                              | 8/2341  | 78/19559 | 0.7305936 | 0.8975491 | 0.8046992 | 8  | ZNF622/WDR46/NOB1/NOP14/NOL6/FBL/RIOK1/UTP4                   |
| Cellular Component | GO:1902555 | endoribonuclease complex                 | 3/2341  | 31/19559 | 0.7348013 | 0.8975491 | 0.8046992 | 3  | ERN1/AGO1/AGO2                                                |
| Cellular Component | GO:0000242 | pericentriolar material                  | 2/2341  | 21/19559 | 0.7350618 | 0.8975491 | 0.8046992 | 2  | TNKS/LCK                                                      |
| Cellular Component | GO:0005922 | connexin complex                         | 2/2341  | 21/19559 | 0.7350618 | 0.8975491 | 0.8046992 | 2  | GJA5/GJB3                                                     |
| Cellular Component | GO:0035267 | NuA4 histone acetyltransferase complex   | 2/2341  | 21/19559 | 0.7350618 | 0.8975491 | 0.8046992 | 2  | EPC1/RUVBL1                                                   |
| Cellular Component | GO:0043189 | H4/H2A histone acetyltransferase complex | 2/2341  | 21/19559 | 0.7350618 | 0.8975491 | 0.8046992 | 2  | EPC1/RUVBL1                                                   |

|                    |            |                                                     |         |           |           |           |           |    |                                                                                                              |
|--------------------|------------|-----------------------------------------------------|---------|-----------|-----------|-----------|-----------|----|--------------------------------------------------------------------------------------------------------------|
| Cellular Component | GO:0045495 | pole plasm                                          | 2/2341  | 21/19559  | 0.7350618 | 0.8975491 | 0.8046992 | 2  | PIWIL4/MOV10L1                                                                                               |
| Cellular Component | GO:0098644 | complex of collagen trimers                         | 2/2341  | 21/19559  | 0.7350618 | 0.8975491 | 0.8046992 | 2  | COL4A2/COL5A1                                                                                                |
| Cellular Component | GO:0000777 | condensed chromosome kinetochore                    | 11/2341 | 106/19559 | 0.7369842 | 0.8989502 | 0.8059554 | 11 | MAD1L1/NDE1/KANSL1/CHAMP1/MIS12/ZNF276/TP53BP1/CENPM/SPAG5/NDEL1/PELI1                                       |
| Cellular Component | GO:0005778 | peroxisomal membrane                                | 6/2341  | 60/19559  | 0.739087  | 0.8996232 | 0.8065587 | 6  | ACSL1/FAR2/CAT/PEX26/FIS1/PEX11B                                                                             |
| Cellular Component | GO:0031903 | microbody membrane                                  | 6/2341  | 60/19559  | 0.739087  | 0.8996232 | 0.8065587 | 6  | ACSL1/FAR2/CAT/PEX26/FIS1/PEX11B                                                                             |
| Cellular Component | GO:0008076 | voltage-gated potassium channel complex             | 9/2341  | 88/19559  | 0.7406456 | 0.900532  | 0.8073735 | 9  | KCNE1/KCNAB2/CTTN/KCNN1/KCNQ2/NOS1AP/KCNIP1/KCNK6/KCNQ1                                                      |
| Cellular Component | GO:0099061 | integral component of postsynaptic density membrane | 5/2341  | 51/19559  | 0.7462828 | 0.900532  | 0.8073735 | 5  | SLC16A3/CNIH2/GSG1L/GRID1/LRFN2                                                                              |
| Cellular Component | GO:0031225 | anchored component of membrane                      | 18/2341 | 171/19559 | 0.7539069 | 0.900532  | 0.8073735 | 18 | LYPD8/CD55/CD177/CEACAM6/RAB5B/SMPDL3B/FOLR3/LY6G6D/ALPL/CD59/ART4/NOD2/LYPD5/DPEP2/LSAMP/OPCML/SVIP/CEACAM5 |
| Cellular Component | GO:0000235 | astral microtubule                                  | 1/2341  | 11/19559  | 0.7540592 | 0.900532  | 0.8073735 | 1  | NUMA1                                                                                                        |

|                    |            |                                                        |        |          |           |          |           |   |        |
|--------------------|------------|--------------------------------------------------------|--------|----------|-----------|----------|-----------|---|--------|
| Cellular Component | GO:0002177 | manchette                                              | 1/2341 | 11/19559 | 0.7540592 | 0.900532 | 0.8073735 | 1 | IQCG   |
| Cellular Component | GO:0005818 | aster                                                  | 1/2341 | 11/19559 | 0.7540592 | 0.900532 | 0.8073735 | 1 | NUMA1  |
| Cellular Component | GO:0005832 | chaperonin-containing T-complex                        | 1/2341 | 11/19559 | 0.7540592 | 0.900532 | 0.8073735 | 1 | CCT6A  |
| Cellular Component | GO:0017101 | aminoacyl-tRNA synthetase multienzyme complex          | 1/2341 | 11/19559 | 0.7540592 | 0.900532 | 0.8073735 | 1 | MARS1  |
| Cellular Component | GO:0019774 | proteasome core complex, beta-subunit complex          | 1/2341 | 11/19559 | 0.7540592 | 0.900532 | 0.8073735 | 1 | PSMB7  |
| Cellular Component | GO:0031838 | haptoglobin-hemoglobin complex                         | 1/2341 | 11/19559 | 0.7540592 | 0.900532 | 0.8073735 | 1 | HBB    |
| Cellular Component | GO:0032797 | SMN complex                                            | 1/2341 | 11/19559 | 0.7540592 | 0.900532 | 0.8073735 | 1 | GEMIN4 |
| Cellular Component | GO:0034992 | microtubule organizing center attachment site          | 1/2341 | 11/19559 | 0.7540592 | 0.900532 | 0.8073735 | 1 | SYNE1  |
| Cellular Component | GO:0034993 | meiotic nuclear membrane microtubule tethering complex | 1/2341 | 11/19559 | 0.7540592 | 0.900532 | 0.8073735 | 1 | SYNE1  |

|                    |            |                                                        |         |           |           |           |           |    |                                                                   |
|--------------------|------------|--------------------------------------------------------|---------|-----------|-----------|-----------|-----------|----|-------------------------------------------------------------------|
| Cellular Component | GO:0035631 | CD40 receptor complex                                  | 1/2341  | 11/19559  | 0.7540592 | 0.900532  | 0.8073735 | 1  | TRAF2                                                             |
| Cellular Component | GO:0036157 | outer dynein arm                                       | 1/2341  | 11/19559  | 0.7540592 | 0.900532  | 0.8073735 | 1  | DNAI2                                                             |
| Cellular Component | GO:0042589 | zymogen granule membrane                               | 1/2341  | 11/19559  | 0.7540592 | 0.900532  | 0.8073735 | 1  | TMED2                                                             |
| Cellular Component | GO:0106083 | nuclear membrane protein complex                       | 1/2341  | 11/19559  | 0.7540592 | 0.900532  | 0.8073735 | 1  | SYNE1                                                             |
| Cellular Component | GO:0106094 | nuclear membrane microtubule tethering complex         | 1/2341  | 11/19559  | 0.7540592 | 0.900532  | 0.8073735 | 1  | SYNE1                                                             |
| Cellular Component | GO:0000780 | condensed nuclear chromosome, centromeric region       | 3/2341  | 32/19559  | 0.7545837 | 0.900532  | 0.8073735 | 3  | MIS12/RAD21L1/PEL1                                                |
| Cellular Component | GO:0005753 | mitochondrial proton-transporting ATP synthase complex | 2/2341  | 22/19559  | 0.758569  | 0.9029831 | 0.8095711 | 2  | ATP5PD/ATP5MPL                                                    |
| Cellular Component | GO:0042629 | mast cell granule                                      | 2/2341  | 22/19559  | 0.758569  | 0.9029831 | 0.8095711 | 2  | LAT/PIK3CD                                                        |
| Cellular Component | GO:0030880 | RNA polymerase complex                                 | 11/2341 | 108/19559 | 0.7589729 | 0.9029831 | 0.8095711 | 11 | POLR2F/RECQL5/POLA2/CRCP/TAF10/CCNH/RMRP/ZNF1/RPRD1B/ERCC2/POLR1D |

|                    |            |                                                    |         |           |           |           |           |    |                                                                                                                                 |
|--------------------|------------|----------------------------------------------------|---------|-----------|-----------|-----------|-----------|----|---------------------------------------------------------------------------------------------------------------------------------|
| Cellular Component | GO:0060076 | excitatory synapse                                 | 5/2341  | 52/19559  | 0.7616381 | 0.9052256 | 0.8115815 | 5  | CADM3/SLC16A3/BAIAP2/AKAP5/CYFIP1                                                                                               |
| Cellular Component | GO:0099699 | integral component of synaptic membrane            | 16/2341 | 154/19559 | 0.7630366 | 0.9059595 | 0.8122395 | 16 | NRP2/CADM3/SLC16A3/SLC8A1/GRIK4/CNIH2/HTR3A/NRXN1/SLC1A2/CHRM2/SLC1A6/GSG1L/P2RX1/GRID1/LRFN2/NECTIN1                           |
| Cellular Component | GO:0030665 | clathrin-coated vesicle membrane                   | 12/2341 | 118/19559 | 0.7673709 | 0.9070601 | 0.8132263 | 12 | AP2A1/TGFA/CD9/DENND1A/AP1B1/EPN2/CHRM2/AP1G2/EPS15/EPN3/CLTCL1/DBNL                                                            |
| Cellular Component | GO:0009295 | nucleoid                                           | 4/2341  | 43/19559  | 0.7732148 | 0.9070601 | 0.8132263 | 4  | TOP1MT/LRRC59/ACADVL/GRSF1                                                                                                      |
| Cellular Component | GO:0042645 | mitochondrial nucleoid                             | 4/2341  | 43/19559  | 0.7732148 | 0.9070601 | 0.8132263 | 4  | TOP1MT/LRRC59/ACADVL/GRSF1                                                                                                      |
| Cellular Component | GO:0046540 | U4/U6 x U5 tri-snRNP complex                       | 4/2341  | 43/19559  | 0.7732148 | 0.9070601 | 0.8132263 | 4  | SNRPD3/LSM7/PRPF8/PRPF6                                                                                                         |
| Cellular Component | GO:0005681 | spliceosomal complex                               | 20/2341 | 192/19559 | 0.7783546 | 0.9070601 | 0.8132263 | 20 | SNRPD3/SF3B3/RHEB/PRKRIP1/SF1/LSM7/PRPF8/CCDC12/SNRNP35/DHX16/CTNBL1/DDX41/PRPF6/PRPF40B/PLRG1/SRRM2/ZCCHC8/SYSCRIP/RALY/TFIP11 |
| Cellular Component | GO:1990204 | oxidoreductase complex                             | 11/2341 | 110/19559 | 0.7796638 | 0.9070601 | 0.8132263 | 11 | P4HB/NCF4/OGDH/NDUFS2/NCF2/NDUFS8/BCKDHA/GMPR2/NDUFB6/SDHD/DMAC1                                                                |
| Cellular Component | GO:0031307 | integral component of mitochondrial outer membrane | 2/2341  | 23/19559  | 0.7802473 | 0.9070601 | 0.8132263 | 2  | FIS1/CPT1A                                                                                                                      |

|                    |            |                                                                              |        |          |           |           |           |   |                |
|--------------------|------------|------------------------------------------------------------------------------|--------|----------|-----------|-----------|-----------|---|----------------|
| Cellular Component | GO:0045259 | proton-transporting ATP synthase complex                                     | 2/2341 | 23/19559 | 0.7802473 | 0.9070601 | 0.8132263 | 2 | ATP5PD/ATP5MPL |
| Cellular Component | GO:0000124 | SAGA complex                                                                 | 1/2341 | 12/19559 | 0.7835122 | 0.9070601 | 0.8132263 | 1 | ENY2           |
| Cellular Component | GO:0000276 | mitochondrial proton-transporting ATP synthase complex, coupling factor F(o) | 1/2341 | 12/19559 | 0.7835122 | 0.9070601 | 0.8132263 | 1 | ATP5PD         |
| Cellular Component | GO:0005583 | fibrillar collagen trimer                                                    | 1/2341 | 12/19559 | 0.7835122 | 0.9070601 | 0.8132263 | 1 | COL5A1         |
| Cellular Component | GO:0005751 | mitochondrial respiratory chain complex IV                                   | 1/2341 | 12/19559 | 0.7835122 | 0.9070601 | 0.8132263 | 1 | NDUFA4L2       |
| Cellular Component | GO:0005833 | hemoglobin complex                                                           | 1/2341 | 12/19559 | 0.7835122 | 0.9070601 | 0.8132263 | 1 | HBB            |
| Cellular Component | GO:0030877 | beta-catenin destruction complex                                             | 1/2341 | 12/19559 | 0.7835122 | 0.9070601 | 0.8132263 | 1 | AXIN1          |
| Cellular Component | GO:0030914 | STAGA complex                                                                | 1/2341 | 12/19559 | 0.7835122 | 0.9070601 | 0.8132263 | 1 | TAF10          |
| Cellular Component | GO:0032280 | symmetric synapse                                                            | 1/2341 | 12/19559 | 0.7835122 | 0.9070601 | 0.8132263 | 1 | CHRM2          |

|                    |            |                                      |        |          |           |           |           |   |        |
|--------------------|------------|--------------------------------------|--------|----------|-----------|-----------|-----------|---|--------|
| Cellular Component | GO:0034709 | methylosome                          | 1/2341 | 12/19559 | 0.7835122 | 0.9070601 | 0.8132263 | 1 | SNRPD3 |
| Cellular Component | GO:0043256 | laminin complex                      | 1/2341 | 12/19559 | 0.7835122 | 0.9070601 | 0.8132263 | 1 | LAMB3  |
| Cellular Component | GO:0061700 | GATOR2 complex                       | 1/2341 | 12/19559 | 0.7835122 | 0.9070601 | 0.8132263 | 1 | SEC13  |
| Cellular Component | GO:0071006 | U2-type catalytic step 1 spliceosome | 1/2341 | 12/19559 | 0.7835122 | 0.9070601 | 0.8132263 | 1 | PRPF8  |
| Cellular Component | GO:0071012 | catalytic step 1 spliceosome         | 1/2341 | 12/19559 | 0.7835122 | 0.9070601 | 0.8132263 | 1 | PRPF8  |
| Cellular Component | GO:0097504 | Gemini of coiled bodies              | 1/2341 | 12/19559 | 0.7835122 | 0.9070601 | 0.8132263 | 1 | GEMIN4 |
| Cellular Component | GO:0098643 | banded collagen fibril               | 1/2341 | 12/19559 | 0.7835122 | 0.9070601 | 0.8132263 | 1 | COL5A1 |
| Cellular Component | GO:0098992 | neuronal dense core vesicle          | 1/2341 | 12/19559 | 0.7835122 | 0.9070601 | 0.8132263 | 1 | NPY    |
| Cellular Component | GO:1990909 | Wnt signalosome                      | 1/2341 | 12/19559 | 0.7835122 | 0.9070601 | 0.8132263 | 1 | ADGRA2 |

|                    |            |                                                      |         |           |           |           |           |    |                                                                                                                                                                                                                                                                              |
|--------------------|------------|------------------------------------------------------|---------|-----------|-----------|-----------|-----------|----|------------------------------------------------------------------------------------------------------------------------------------------------------------------------------------------------------------------------------------------------------------------------------|
| Cellular Component | GO:0097526 | spliceosomal tri-snRNP complex                       | 4/2341  | 44/19559  | 0.7886755 | 0.9121272 | 0.8177693 | 4  | SNRPD3/LSM7/PRPF8/PRPF6                                                                                                                                                                                                                                                      |
| Cellular Component | GO:0099146 | intrinsic component of postsynaptic density membrane | 5/2341  | 54/19559  | 0.7902222 | 0.9124918 | 0.8180961 | 5  | SLC16A3/CNIH2/GSG1L/GRID1/LRFN2                                                                                                                                                                                                                                              |
| Cellular Component | GO:0032839 | dendrite cytoplasm                                   | 3/2341  | 34/19559  | 0.790564  | 0.9124918 | 0.8180961 | 3  | BAIAP2/CCIN/KIF5C                                                                                                                                                                                                                                                            |
| Cellular Component | GO:0009897 | external side of plasma membrane                     | 45/2341 | 417/19559 | 0.7936831 | 0.9151813 | 0.8205074 | 45 | ITGAE/P4HB/CALR/CD9/CSF3R/IL1R1/CCR2/TNF/FOLR3/ABCG1/IGHV6-1/LY6G6D/TGFBR2/ACKR2/THBS1/CD226/HLA-F/ITGA2B/CCR9/STAB2/FCN1/SLC22A11/CD79A/CD59/SLC7A5/PTPRC/CXCR1/ABCA1/TRGV9/IL6R/CLPTM1/CTSB/ENG/ITGB2/P2RX1/TMC1/LY6G5C/DNAI2/CD33/CRLF1/FLOT1/ITGB6/CX3CR1/CEACAM5/ADGRA3 |
| Cellular Component | GO:0098982 | GABA-ergic synapse                                   | 7/2341  | 74/19559  | 0.7976543 | 0.9181296 | 0.8231507 | 7  | ATP2B2/CTBP1/NRXN1/CTBP2/PLCB1/GABBR1/FLOT1                                                                                                                                                                                                                                  |
| Cellular Component | GO:0000178 | exosome (RNase complex)                              | 2/2341  | 24/19559  | 0.8001975 | 0.9181296 | 0.8231507 | 2  | EXOSC2/DIS3L2                                                                                                                                                                                                                                                                |
| Cellular Component | GO:0031306 | intrinsic component of mitochondrial outer membrane  | 2/2341  | 24/19559  | 0.8001975 | 0.9181296 | 0.8231507 | 2  | FIS1/CPT1A                                                                                                                                                                                                                                                                   |
| Cellular Component | GO:0035327 | transcriptionally active chromatin                   | 2/2341  | 24/19559  | 0.8001975 | 0.9181296 | 0.8231507 | 2  | PADI2/ZC3H8                                                                                                                                                                                                                                                                  |
| Cellular Component | GO:0097381 | photoreceptor disc membrane                          | 2/2341  | 24/19559  | 0.8001975 | 0.9181296 | 0.8231507 | 2  | PDE6A/GRK7                                                                                                                                                                                                                                                                   |



|                    |            |                                                     |         |           |           |           |           |    |                                                          |
|--------------------|------------|-----------------------------------------------------|---------|-----------|-----------|-----------|-----------|----|----------------------------------------------------------|
| Cellular Component | GO:0005796 | Golgi lumen                                         | 10/2341 | 103/19559 | 0.8027119 | 0.9187375 | 0.8236957 | 10 | DEFA4/APP/MUC12/PCSK6/SDC2/TGFB1/DEFB1/MUC20/WNT5B/PDGFB |
| Cellular Component | GO:0001401 | SAM complex                                         | 1/2341  | 13/19559  | 0.8094394 | 0.9187375 | 0.8236957 | 1  | IMMT                                                     |
| Cellular Component | GO:0005687 | U4 snRNP                                            | 1/2341  | 13/19559  | 0.8094394 | 0.9187375 | 0.8236957 | 1  | SNRPD3                                                   |
| Cellular Component | GO:0005688 | U6 snRNP                                            | 1/2341  | 13/19559  | 0.8094394 | 0.9187375 | 0.8236957 | 1  | LSM7                                                     |
| Cellular Component | GO:0008250 | oligosaccharyltransferase complex                   | 1/2341  | 13/19559  | 0.8094394 | 0.9187375 | 0.8236957 | 1  | RPN1                                                     |
| Cellular Component | GO:0016281 | eukaryotic translation initiation factor 4F complex | 1/2341  | 13/19559  | 0.8094394 | 0.9187375 | 0.8236957 | 1  | EIF4G1                                                   |
| Cellular Component | GO:0033391 | chromatoid body                                     | 1/2341  | 13/19559  | 0.8094394 | 0.9187375 | 0.8236957 | 1  | ARNTL                                                    |
| Cellular Component | GO:0044292 | dendrite terminus                                   | 1/2341  | 13/19559  | 0.8094394 | 0.9187375 | 0.8236957 | 1  | CYFIP1                                                   |
| Cellular Component | GO:0071203 | WASH complex                                        | 1/2341  | 13/19559  | 0.8094394 | 0.9187375 | 0.8236957 | 1  | SNX27                                                    |

|                    |            |                                                               |         |           |           |           |           |    |                                                           |
|--------------------|------------|---------------------------------------------------------------|---------|-----------|-----------|-----------|-----------|----|-----------------------------------------------------------|
| Cellular Component | GO:0098691 | dopaminergic synapse                                          | 1/2341  | 13/19559  | 0.8094394 | 0.9187375 | 0.8236957 | 1  | FLOT1                                                     |
| Cellular Component | GO:0098993 | anchored component of synaptic vesicle membrane               | 1/2341  | 13/19559  | 0.8094394 | 0.9187375 | 0.8236957 | 1  | RAB5B                                                     |
| Cellular Component | GO:0097346 | INO80-type complex                                            | 2/2341  | 25/19559  | 0.8185225 | 0.9272325 | 0.8313119 | 2  | SRCAP/RUVBL1                                              |
| Cellular Component | GO:1905354 | exoribonuclease complex                                       | 2/2341  | 25/19559  | 0.8185225 | 0.9272325 | 0.8313119 | 2  | EXOSC2/DIS3L2                                             |
| Cellular Component | GO:0001669 | acrosomal vesicle                                             | 11/2341 | 115/19559 | 0.8257677 | 0.9336795 | 0.837092  | 11 | BSG/CALR/ACRBP/HEXB/BMF/CRCP/NCF2/CLK3/TEX22/NOTCH1/PLA1A |
| Cellular Component | GO:0000177 | cytoplasmic exosome (RNase complex)                           | 1/2341  | 14/19559  | 0.8322626 | 0.9336795 | 0.837092  | 1  | EXOSC2                                                    |
| Cellular Component | GO:0000346 | transcription export complex                                  | 1/2341  | 14/19559  | 0.8322626 | 0.9336795 | 0.837092  | 1  | NXF1                                                      |
| Cellular Component | GO:0005744 | TIM23 mitochondrial import inner membrane translocase complex | 1/2341  | 14/19559  | 0.8322626 | 0.9336795 | 0.837092  | 1  | PAM16                                                     |
| Cellular Component | GO:0005940 | septin ring                                                   | 1/2341  | 14/19559  | 0.8322626 | 0.9336795 | 0.837092  | 1  | SEPTIN9                                                   |

|                    |            |                                                                |         |           |           |           |           |    |                                                                     |
|--------------------|------------|----------------------------------------------------------------|---------|-----------|-----------|-----------|-----------|----|---------------------------------------------------------------------|
| Cellular Component | GO:0031105 | septin complex                                                 | 1/2341  | 14/19559  | 0.8322626 | 0.9336795 | 0.837092  | 1  | SEPTIN9                                                             |
| Cellular Component | GO:0031462 | Cul2-RING ubiquitin ligase complex                             | 1/2341  | 14/19559  | 0.8322626 | 0.9336795 | 0.837092  | 1  | ZSWIM5                                                              |
| Cellular Component | GO:0033276 | transcription factor TFTC complex                              | 1/2341  | 14/19559  | 0.8322626 | 0.9336795 | 0.837092  | 1  | TAF10                                                               |
| Cellular Component | GO:0043240 | Fanconi anaemia nuclear complex                                | 1/2341  | 14/19559  | 0.8322626 | 0.9336795 | 0.837092  | 1  | FANCA                                                               |
| Cellular Component | GO:0045263 | proton-transporting ATP synthase complex, coupling factor F(o) | 1/2341  | 14/19559  | 0.8322626 | 0.9336795 | 0.837092  | 1  | ATP5PD                                                              |
| Cellular Component | GO:0034706 | sodium channel complex                                         | 2/2341  | 26/19559  | 0.8353254 | 0.9362101 | 0.8393607 | 2  | GRIK4/SCN1A                                                         |
| Cellular Component | GO:0035869 | ciliary transition zone                                        | 6/2341  | 68/19559  | 0.8387233 | 0.939111  | 0.8419616 | 6  | CDKL1/IFT140/RPGRIP1/KIFAP3/NPHP4/CPLANE1                           |
| Cellular Component | GO:0015030 | Cajal body                                                     | 7/2341  | 78/19559  | 0.8396279 | 0.9392173 | 0.8420569 | 7  | HMBOX1/ZC3H8/SRRM2/TOE1/FBL/ISG20/GEMIN4                            |
| Cellular Component | GO:0099055 | integral component of postsynaptic membrane                    | 11/2341 | 117/19559 | 0.8420202 | 0.940986  | 0.8436426 | 11 | NRP2/SLC16A3/SLC8A1/GRIK4/CNIH2/HTR3A/CHRM2/GSG1L/P2RX1/GRID1/LRFN2 |

|                    |            |                                    |        |          |           |           |           |   |                                                       |
|--------------------|------------|------------------------------------|--------|----------|-----------|-----------|-----------|---|-------------------------------------------------------|
| Cellular Component | GO:0005746 | mitochondrial respirasome          | 8/2341 | 89/19559 | 0.8502118 | 0.9443456 | 0.8466547 | 8 | NDUFS2/NDUFS8/NDUFB6/NDUFA4L2/SDHD/RAB5IF/STMP1/DMAC1 |
| Cellular Component | GO:0000164 | protein phosphatase type 1 complex | 1/2341 | 15/19559 | 0.8523533 | 0.9443456 | 0.8466547 | 1 | PPP1CB                                                |
| Cellular Component | GO:0005665 | RNA polymerase II, core complex    | 1/2341 | 15/19559 | 0.8523533 | 0.9443456 | 0.8466547 | 1 | POLR2F                                                |
| Cellular Component | GO:0005859 | muscle myosin complex              | 1/2341 | 15/19559 | 0.8523533 | 0.9443456 | 0.8466547 | 1 | MYH11                                                 |
| Cellular Component | GO:0031011 | Ino80 complex                      | 1/2341 | 15/19559 | 0.8523533 | 0.9443456 | 0.8466547 | 1 | RUVBL1                                                |
| Cellular Component | GO:0032156 | septin cytoskeleton                | 1/2341 | 15/19559 | 0.8523533 | 0.9443456 | 0.8466547 | 1 | SEPTIN9                                               |
| Cellular Component | GO:0032591 | dendritic spine membrane           | 1/2341 | 15/19559 | 0.8523533 | 0.9443456 | 0.8466547 | 1 | PALM                                                  |
| Cellular Component | GO:0033202 | DNA helicase complex               | 1/2341 | 15/19559 | 0.8523533 | 0.9443456 | 0.8466547 | 1 | RUVBL1                                                |
| Cellular Component | GO:0042588 | zymogen granule                    | 1/2341 | 15/19559 | 0.8523533 | 0.9443456 | 0.8466547 | 1 | TMED2                                                 |

|                    |            |                                                     |         |           |           |           |           |    |                                                                                                                                                      |
|--------------------|------------|-----------------------------------------------------|---------|-----------|-----------|-----------|-----------|----|------------------------------------------------------------------------------------------------------------------------------------------------------|
| Cellular Component | GO:0099240 | intrinsic component of synaptic membrane            | 16/2341 | 166/19559 | 0.8539948 | 0.9449857 | 0.8472286 | 16 | NRP2/CADM3/SLC16A3/SLC8A1/GRIK4/CNIH2/HTR3A/NRXN1/SLC1A2/CHRM2/SLC1A6/GSG1L/P2RX1/GRID1/LRFN2/NECTIN1                                                |
| Cellular Component | GO:0005801 | cis-Golgi network                                   | 6/2341  | 70/19559  | 0.8581451 | 0.9449857 | 0.8472286 | 6  | LIMK2/SLC35C2/PIK3R1/TRAPPC3L/UBXN2A/RAB30                                                                                                           |
| Cellular Component | GO:0072562 | blood microparticle                                 | 14/2341 | 148/19559 | 0.8594924 | 0.9449857 | 0.8472286 | 14 | GSN/ZBTB38/ITGA2B/CLU/TGFB1/HBB/PFN1/C1S/ACTG1/ENG/YWHAZ/SLC2A1/C1QB/C1RL                                                                            |
| Cellular Component | GO:0045111 | intermediate filament cytoskeleton                  | 25/2341 | 251/19559 | 0.862198  | 0.9449857 | 0.8472286 | 25 | S100A8/IFFO1/NR1I2/MICAL1/NARF/KRT17/JUP/PKP1/DISC1/NEFM/LMNB2/SMARCA2/SMG7/CLK3/IFFO2/MYO5A/GFAP/SLC1A6/KRTAP5-9/SHANK2/KRT23/KRT7/NDEL1/PPL/LMNTD1 |
| Cellular Component | GO:0005747 | mitochondrial respiratory chain complex I           | 4/2341  | 50/19559  | 0.8644068 | 0.9449857 | 0.8472286 | 4  | NDUFS2/NDUFS8/NDUFB6/DMAC1                                                                                                                           |
| Cellular Component | GO:0030964 | NADH dehydrogenase complex                          | 4/2341  | 50/19559  | 0.8644068 | 0.9449857 | 0.8472286 | 4  | NDUFS2/NDUFS8/NDUFB6/DMAC1                                                                                                                           |
| Cellular Component | GO:0031201 | SNARE complex                                       | 4/2341  | 50/19559  | 0.8644068 | 0.9449857 | 0.8472286 | 4  | STX5/VTI1A/SYN2/TSNARE1                                                                                                                              |
| Cellular Component | GO:0031304 | intrinsic component of mitochondrial inner membrane | 4/2341  | 50/19559  | 0.8644068 | 0.9449857 | 0.8472286 | 4  | SPG7/SFXN1/IMMT/PPOX                                                                                                                                 |
| Cellular Component | GO:0031305 | integral component of mitochondrial inner membrane  | 4/2341  | 50/19559  | 0.8644068 | 0.9449857 | 0.8472286 | 4  | SPG7/SFXN1/IMMT/PPOX                                                                                                                                 |

|                    |            |                                       |        |          |           |           |           |   |                                 |
|--------------------|------------|---------------------------------------|--------|----------|-----------|-----------|-----------|---|---------------------------------|
| Cellular Component | GO:0045271 | respiratory chain complex I           | 4/2341 | 50/19559 | 0.8644068 | 0.9449857 | 0.8472286 | 4 | NDUFS2/NDUFS8/NDUFB6/DMAC1      |
| Cellular Component | GO:0000314 | organellar small ribosomal subunit    | 2/2341 | 28/19559 | 0.864769  | 0.9449857 | 0.8472286 | 2 | MRPS21/MRPS26                   |
| Cellular Component | GO:0005763 | mitochondrial small ribosomal subunit | 2/2341 | 28/19559 | 0.864769  | 0.9449857 | 0.8472286 | 2 | MRPS21/MRPS26                   |
| Cellular Component | GO:0070461 | SAGA-type complex                     | 2/2341 | 28/19559 | 0.864769  | 0.9449857 | 0.8472286 | 2 | TAF10/ENY2                      |
| Cellular Component | GO:0032589 | neuron projection membrane            | 5/2341 | 61/19559 | 0.8695282 | 0.9449857 | 0.8472286 | 5 | AKAP5/EPB41L3/SLC1A2/PALM/MYO1C |
| Cellular Component | GO:0035861 | site of double-strand break           | 5/2341 | 61/19559 | 0.8695282 | 0.9449857 | 0.8472286 | 5 | HUS1/SMARCAL1/TP53BP1/PAXX/SLF1 |
| Cellular Component | GO:0000176 | nuclear exosome (RNase complex)       | 1/2341 | 16/19559 | 0.8700386 | 0.9449857 | 0.8472286 | 1 | EXOSC2                          |
| Cellular Component | GO:0005869 | dynactin complex                      | 1/2341 | 16/19559 | 0.8700386 | 0.9449857 | 0.8472286 | 1 | DCTN2                           |
| Cellular Component | GO:0030014 | CCR4-NOT complex                      | 1/2341 | 16/19559 | 0.8700386 | 0.9449857 | 0.8472286 | 1 | CPEB3                           |

|                    |            |                                              |         |           |           |           |           |    |                                                                     |
|--------------------|------------|----------------------------------------------|---------|-----------|-----------|-----------|-----------|----|---------------------------------------------------------------------|
| Cellular Component | GO:0035098 | ESC/E(Z) complex                             | 1/2341  | 16/19559  | 0.8700386 | 0.9449857 | 0.8472286 | 1  | PHF19                                                               |
| Cellular Component | GO:0042613 | MHC class II protein complex                 | 1/2341  | 16/19559  | 0.8700386 | 0.9449857 | 0.8472286 | 1  | HLA-DMB                                                             |
| Cellular Component | GO:0045120 | pronucleus                                   | 1/2341  | 16/19559  | 0.8700386 | 0.9449857 | 0.8472286 | 1  | SLC2A1                                                              |
| Cellular Component | GO:0032391 | photoreceptor connecting cilium              | 3/2341  | 40/19559  | 0.8729961 | 0.9453621 | 0.847566  | 3  | IFT140/RPGRIP1/KIFAP3                                               |
| Cellular Component | GO:0098839 | postsynaptic density membrane                | 8/2341  | 92/19559  | 0.874191  | 0.9453621 | 0.847566  | 8  | SORCS2/SLC16A3/CACNA1C/ATP2B2/CNIH2/GSG1L/GRID1/LRFN2               |
| Cellular Component | GO:1905368 | peptidase complex                            | 8/2341  | 92/19559  | 0.874191  | 0.9453621 | 0.847566  | 8  | PIGU/SPG7/ENY2/PSMF1/PSMB7/UBE3A/PSMD13/SPCS1                       |
| Cellular Component | GO:0090734 | site of DNA damage                           | 7/2341  | 82/19559  | 0.8743419 | 0.9453621 | 0.847566  | 7  | HUS1/SMARCAL1/TP53BP1/KAT7/PARP9/PAXX/SLF1                          |
| Cellular Component | GO:0098878 | neurotransmitter receptor complex            | 4/2341  | 51/19559  | 0.8744599 | 0.9453621 | 0.847566  | 4  | GRIK4/CNIH2/HTR3A/SHANK2                                            |
| Cellular Component | GO:0098936 | intrinsic component of postsynaptic membrane | 11/2341 | 122/19559 | 0.8775067 | 0.9477726 | 0.8497272 | 11 | NRP2/SLC16A3/SLC8A1/GRIK4/CNIH2/HTR3A/CHRM2/GSG1L/P2RX1/GRID1/LRFN2 |

|                    |            |                                                    |        |           |           |           |           |   |                                                         |
|--------------------|------------|----------------------------------------------------|--------|-----------|-----------|-----------|-----------|---|---------------------------------------------------------|
| Cellular Component | GO:0055029 | nuclear DNA-directed RNA polymerase complex        | 9/2341 | 103/19559 | 0.8817091 | 0.9514256 | 0.8530023 | 9 | POLR2F/RECQL5/POLA2/CRCP/TAF10/CCNH/RPRD1B/ERCC2/POLR1D |
| Cellular Component | GO:0001518 | voltage-gated sodium channel complex               | 1/2341 | 17/19559  | 0.8856063 | 0.9538564 | 0.8551816 | 1 | SCN1A                                                   |
| Cellular Component | GO:0042599 | lamellar body                                      | 1/2341 | 17/19559  | 0.8856063 | 0.9538564 | 0.8551816 | 1 | CTSH                                                    |
| Cellular Component | GO:0000428 | DNA-directed RNA polymerase complex                | 9/2341 | 104/19559 | 0.888296  | 0.955181  | 0.8563692 | 9 | POLR2F/RECQL5/POLA2/CRCP/TAF10/CCNH/RPRD1B/ERCC2/POLR1D |
| Cellular Component | GO:0000137 | Golgi cis cisterna                                 | 2/2341 | 30/19559  | 0.8893065 | 0.955181  | 0.8563692 | 2 | XYLT1/ATL1                                              |
| Cellular Component | GO:0005732 | small nucleolar ribonucleoprotein complex          | 2/2341 | 30/19559  | 0.8893065 | 0.955181  | 0.8563692 | 2 | RMRP/FBL                                                |
| Cellular Component | GO:0016471 | vacuolar proton-transporting V-type ATPase complex | 1/2341 | 18/19559  | 0.8993099 | 0.96414   | 0.8644014 | 1 | ATP6V1C1                                                |
| Cellular Component | GO:0030663 | COPI-coated vesicle membrane                       | 1/2341 | 18/19559  | 0.8993099 | 0.96414   | 0.8644014 | 1 | TMED2                                                   |
| Cellular Component | GO:0005921 | gap junction                                       | 2/2341 | 32/19559  | 0.9096539 | 0.9728939 | 0.8722497 | 2 | GJA5/GJB3                                               |



|                    |            |                                                 |         |           |           |           |           |    |                                                                             |
|--------------------|------------|-------------------------------------------------|---------|-----------|-----------|-----------|-----------|----|-----------------------------------------------------------------------------|
| Cellular Component | GO:0042788 | polysomal ribosome                              | 2/2341  | 32/19559  | 0.9096539 | 0.9728939 | 0.8722497 | 2  | LARP1/EIF3H                                                                 |
| Cellular Component | GO:0030992 | intraciliary transport particle<br>B            | 1/2341  | 19/19559  | 0.9113725 | 0.9728939 | 0.8722497 | 1  | CLUAP1                                                                      |
| Cellular Component | GO:0048500 | signal recognition particle                     | 1/2341  | 19/19559  | 0.9113725 | 0.9728939 | 0.8722497 | 1  | DERL2                                                                       |
| Cellular Component | GO:0098800 | inner mitochondrial<br>membrane protein complex | 12/2341 | 138/19559 | 0.9116687 | 0.9728939 | 0.8722497 | 12 | PAM16/SPG7/NDUFS2/PHB/NDUFS8/IMMT/NDUFB6/NDUFA4L2/SDHD/ATP5PD/DMAC1/ATP5MPL |
| Cellular Component | GO:0005881 | cytoplasmic microtubule                         | 6/2341  | 78/19559  | 0.9174727 | 0.9781878 | 0.876996  | 6  | DYNC1H1/BCL10/NUMA1/CYLD/FBXW11/TUBGCP2                                     |
| Cellular Component | GO:0035145 | exon-exon junction complex                      | 1/2341  | 20/19559  | 0.9219906 | 0.9803016 | 0.8788911 | 1  | SMG6                                                                        |
| Cellular Component | GO:0045277 | respiratory chain complex IV                    | 1/2341  | 20/19559  | 0.9219906 | 0.9803016 | 0.8788911 | 1  | NDUFA4L2                                                                    |
| Cellular Component | GO:1902710 | GABA receptor complex                           | 1/2341  | 20/19559  | 0.9219906 | 0.9803016 | 0.8788911 | 1  | GABBR2                                                                      |
| Cellular Component | GO:0016591 | RNA polymerase II,<br>holoenzyme                | 6/2341  | 79/19559  | 0.923104  | 0.9805867 | 0.8791467 | 6  | POLR2F/RECQL5/TAF10/CCNH/RPRD1B/ERCC2                                       |

|                    |            |                                     |         |           |           |           |          |    |                                                                                                                                  |
|--------------------|------------|-------------------------------------|---------|-----------|-----------|-----------|----------|----|----------------------------------------------------------------------------------------------------------------------------------|
| Cellular Component | GO:0005669 | transcription factor TFIIID complex | 2/2341  | 34/19559  | 0.9264535 | 0.9812452 | 0.879737 | 2  | TAF10/ERCC2                                                                                                                      |
| Cellular Component | GO:0005720 | nuclear heterochromatin             | 2/2341  | 34/19559  | 0.9264535 | 0.9812452 | 0.879737 | 2  | EME1/UHRF1                                                                                                                       |
| Cellular Component | GO:1905369 | endopeptidase complex               | 5/2341  | 69/19559  | 0.9275878 | 0.9812452 | 0.879737 | 5  | PIGU/PSMF1/PSMB7/UBE3A/PSMD13                                                                                                    |
| Cellular Component | GO:0070469 | respirasome                         | 8/2341  | 101/19559 | 0.9278589 | 0.9812452 | 0.879737 | 8  | NDUF52/NDUFS8/NDUFB6/NDUFA4L2/SDHD/RAB5IF/STMP1/DMAC1                                                                            |
| Cellular Component | GO:0034703 | cation channel complex              | 20/2341 | 221/19559 | 0.9309042 | 0.9812452 | 0.879737 | 20 | PDE4D/KCNE1/KCNAB2/CASQ2/CACNA1C/CACNA2D4/CTTN/PKD1L1/KCNN1/KCNQ2/NOS1AP/KCNIP1/GRIK4/SCN1A/KCNK6/CNIH2/HTR3A/KCNQ1/CACNA1B/PTPA |
| Cellular Component | GO:0000930 | gamma-tubulin complex               | 1/2341  | 21/19559  | 0.931337  | 0.9812452 | 0.879737 | 1  | TUBGCP2                                                                                                                          |
| Cellular Component | GO:0005838 | proteasome regulatory particle      | 1/2341  | 21/19559  | 0.931337  | 0.9812452 | 0.879737 | 1  | PSMD13                                                                                                                           |
| Cellular Component | GO:0005868 | cytoplasmic dynein complex          | 1/2341  | 21/19559  | 0.931337  | 0.9812452 | 0.879737 | 1  | DYNC1H1                                                                                                                          |
| Cellular Component | GO:0042827 | platelet dense granule              | 1/2341  | 21/19559  | 0.931337  | 0.9812452 | 0.879737 | 1  | ITPR1                                                                                                                            |

|                    |            |                                               |         |           |           |           |           |    |                                                                                                            |
|--------------------|------------|-----------------------------------------------|---------|-----------|-----------|-----------|-----------|----|------------------------------------------------------------------------------------------------------------|
| Cellular Component | GO:0032592 | integral component of mitochondrial membrane  | 6/2341  | 81/19559  | 0.9333626 | 0.982487  | 0.8808504 | 6  | SPG7/SFXN1/IMMT/PPOX/FIS1/CPT1A                                                                            |
| Cellular Component | GO:0005604 | basement membrane                             | 8/2341  | 103/19559 | 0.9366405 | 0.9850435 | 0.8831425 | 8  | COL17A1/TGFB1/COL4A2/COLQ/EGFLAM/COL5A1/COL28A1/LAMB3                                                      |
| Cellular Component | GO:0098573 | intrinsic component of mitochondrial membrane | 6/2341  | 82/19559  | 0.9380221 | 0.985603  | 0.883644  | 6  | SPG7/SFXN1/IMMT/PPOX/FIS1/CPT1A                                                                            |
| Cellular Component | GO:0046658 | anchored component of plasma membrane         | 4/2341  | 60/19559  | 0.9393243 | 0.986078  | 0.8840699 | 4  | CD177/FOLR3/CD59/NOD2                                                                                      |
| Cellular Component | GO:0032993 | protein-DNA complex                           | 18/2341 | 205/19559 | 0.9411471 | 0.9870982 | 0.8849846 | 18 | RAD52/JUP/POLA2/TCF7L2/ZBTB17/PAX2/SPHK2/SP3/KDM1B/SMARCA1/NFE2L2/HHEX/PLRG1/POLD3/XPA/MACROH2A2/H3C1/SLF1 |
| Cellular Component | GO:0008328 | ionotropic glutamate receptor complex         | 3/2341  | 49/19559  | 0.9432598 | 0.9884204 | 0.88617   | 3  | GRIK4/CNIH2/SHANK2                                                                                         |
| Cellular Component | GO:0005685 | U1 snRNP                                      | 2/2341  | 37/19559  | 0.9462176 | 0.9903468 | 0.8878972 | 2  | SNRPD3/PRPF40B                                                                                             |
| Cellular Component | GO:0030687 | preribosome, large subunit precursor          | 1/2341  | 23/19559  | 0.9468057 | 0.9903468 | 0.8878972 | 1  | ZNF622                                                                                                     |
| Cellular Component | GO:0098803 | respiratory chain complex                     | 6/2341  | 85/19559  | 0.9503068 | 0.9916491 | 0.8890648 | 6  | NDUFS2/NDUFS8/NDUFB6/NDUFA4L2/SDHD/DMAC1                                                                   |

|                    |            |                                                            |        |          |           |           |           |   |                                        |
|--------------------|------------|------------------------------------------------------------|--------|----------|-----------|-----------|-----------|---|----------------------------------------|
| Cellular Component | GO:0099060 | integral component of postsynaptic specialization membrane | 5/2341 | 74/19559 | 0.9509362 | 0.9916491 | 0.8890648 | 5 | SLC16A3/CNIH2/GSG1L/GRID1/LRFN2        |
| Cellular Component | GO:0000502 | proteasome complex                                         | 4/2341 | 63/19559 | 0.9529495 | 0.9916491 | 0.8890648 | 4 | PSMF1/PSMB7/UBE3A/PSMD13               |
| Cellular Component | GO:0005686 | U2 snRNP                                                   | 1/2341 | 24/19559 | 0.95318   | 0.9916491 | 0.8890648 | 1 | SNRPD3                                 |
| Cellular Component | GO:0022624 | proteasome accessory complex                               | 1/2341 | 24/19559 | 0.95318   | 0.9916491 | 0.8890648 | 1 | PSMD13                                 |
| Cellular Component | GO:0098799 | outer mitochondrial membrane protein complex               | 1/2341 | 24/19559 | 0.95318   | 0.9916491 | 0.8890648 | 1 | IMMT                                   |
| Cellular Component | GO:0000313 | organellar ribosome                                        | 6/2341 | 87/19559 | 0.9572302 | 0.9939207 | 0.8911013 | 6 | MRPL3/MRPL38/MTG2/MRPS21/MRPS26/MRPL28 |
| Cellular Component | GO:0005761 | mitochondrial ribosome                                     | 6/2341 | 87/19559 | 0.9572302 | 0.9939207 | 0.8911013 | 6 | MRPL3/MRPL38/MTG2/MRPS21/MRPS26/MRPL28 |
| Cellular Component | GO:0097228 | sperm principal piece                                      | 1/2341 | 25/19559 | 0.9587907 | 0.9939207 | 0.8911013 | 1 | SPAG6                                  |
| Cellular Component | GO:0101031 | chaperone complex                                          | 1/2341 | 25/19559 | 0.9587907 | 0.9939207 | 0.8911013 | 1 | CCT6A                                  |

|                    |            |                                                             |        |          |           |           |           |   |                                 |
|--------------------|------------|-------------------------------------------------------------|--------|----------|-----------|-----------|-----------|---|---------------------------------|
| Cellular Component | GO:0098948 | intrinsic component of postsynaptic specialization membrane | 5/2341 | 77/19559 | 0.9614245 | 0.9957611 | 0.8927513 | 5 | SLC16A3/CNIH2/GSG1L/GRID1/LRFN2 |
| Cellular Component | GO:0032281 | AMPA glutamate receptor complex                             | 1/2341 | 26/19559 | 0.9637293 | 0.9972578 | 0.8940932 | 1 | CNIH2                           |
| Cellular Component | GO:0036452 | ESCRT complex                                               | 1/2341 | 27/19559 | 0.9680763 | 0.9999998 | 0.8965515 | 1 | MVB12A                          |
| Cellular Component | GO:0032590 | dendrite membrane                                           | 2/2341 | 43/19559 | 0.9716217 | 0.9999998 | 0.8965515 | 2 | AKAP5/PALM                      |
| Cellular Component | GO:0030137 | COPI-coated vesicle                                         | 1/2341 | 28/19559 | 0.9719025 | 0.9999998 | 0.8965515 | 1 | TMED2                           |
| Cellular Component | GO:0032809 | neuronal cell body membrane                                 | 1/2341 | 28/19559 | 0.9719025 | 0.9999998 | 0.8965515 | 1 | CX3CR1                          |
| Cellular Component | GO:0000315 | organellar large ribosomal subunit                          | 3/2341 | 57/19559 | 0.9734294 | 0.9999998 | 0.8965515 | 3 | MRPL3/MRPL38/MRPL28             |
| Cellular Component | GO:0005762 | mitochondrial large ribosomal subunit                       | 3/2341 | 57/19559 | 0.9734294 | 0.9999998 | 0.8965515 | 3 | MRPL3/MRPL38/MRPL28             |
| Cellular Component | GO:0030867 | rough endoplasmic reticulum membrane                        | 1/2341 | 29/19559 | 0.9752703 | 0.9999998 | 0.8965515 | 1 | DERL2                           |

|                    |            |                                      |         |           |           |           |           |    |                                                                                                                                                                                    |                                                                                                    |
|--------------------|------------|--------------------------------------|---------|-----------|-----------|-----------|-----------|----|------------------------------------------------------------------------------------------------------------------------------------------------------------------------------------|----------------------------------------------------------------------------------------------------|
| Cellular Component | GO:0032039 | integrator complex                   | 1/2341  | 29/19559  | 0.9752703 | 0.9999998 | 0.8965515 | 1  |                                                                                                                                                                                    | ESRRB                                                                                              |
| Cellular Component | GO:0097225 | sperm midpiece                       | 1/2341  | 29/19559  | 0.9752703 | 0.9999998 | 0.8965515 | 1  |                                                                                                                                                                                    | DEFB1                                                                                              |
| Cellular Component | GO:1902495 | transmembrane transporter complex    | 28/2341 | 322/19559 | 0.9760037 | 0.9999998 | 0.8965515 | 28 | PDE4D/KCNE1/KCNAB2/CASQ2/FXYD2/CACNA1C/CACNA2D4/FXYD1/CTTN/PKD1L1/KCNN1/KCNQ2/NOS1AP/LRRC8C/KCNIP1/GRIK4/SCN1A/KCNK6/CNIH2/HTR3A/KCNQ1/LRRC8B/SHANK2/ABCB8/ANO6/CACNA1B/PTPA/PACC1 |                                                                                                    |
| Cellular Component | GO:0099634 | postsynaptic specialization membrane | 8/2341  | 118/19559 | 0.9775337 | 0.9999998 | 0.8965515 | 8  |                                                                                                                                                                                    | SORCS2/SLC16A3/CACNA1C/ATP2B2/CNIH2/GSG1L/GRID1/LRFN2                                              |
| Cellular Component | GO:0005882 | intermediate filament                | 17/2341 | 215/19559 | 0.9793843 | 0.9999998 | 0.8965515 | 17 |                                                                                                                                                                                    | IFFO1/MICAL1/NARF/KRT17/JUP/PKP1/NEFM/LMNB2/IFFO2/MYO5A/GFAP/KRTAP5-9/SHANK2/KRT23/KRT7/PPL/LMNTD1 |
| Cellular Component | GO:0044298 | cell body membrane                   | 1/2341  | 31/19559  | 0.9808437 | 0.9999998 | 0.8965515 | 1  |                                                                                                                                                                                    | CX3CR1                                                                                             |
| Cellular Component | GO:0034702 | ion channel complex                  | 25/2341 | 299/19559 | 0.9825021 | 0.9999998 | 0.8965515 | 25 | PDE4D/KCNE1/KCNAB2/CASQ2/CACNA1C/CACNA2D4/CTTN/PKD1L1/KCNN1/KCNQ2/NOS1AP/LRRC8C/KCNIP1/GRIK4/SCN1A/KCNK6/CNIH2/HTR3A/KCNQ1/LRRC8B/SHANK2/ANO6/CACNA1B/PTPA/PACC1                   |                                                                                                    |
| Cellular Component | GO:1990351 | transporter complex                  | 28/2341 | 330/19559 | 0.9834868 | 0.9999998 | 0.8965515 | 28 | PDE4D/KCNE1/KCNAB2/CASQ2/FXYD2/CACNA1C/CACNA2D4/FXYD1/CTTN/PKD1L1/KCNN1/KCNQ2/NOS1AP/LRRC8C/KCNIP1/GRIK4/SCN1A/KCNK6/CNIH2/HTR3A/KCNQ1/LRRC8B/SHANK2/ABCB8/ANO6/CACNA1B/PTPA/PACC1 |                                                                                                    |
| Cellular Component | GO:0034707 | chloride channel complex             | 2/2341  | 50/19559  | 0.986782  | 0.9999998 | 0.8965515 | 2  |                                                                                                                                                                                    | ANO6/PACC1                                                                                         |

|                    |            |                                            |         |           |           |           |           |    |                                                                                                                                                                                                                                                                                   |
|--------------------|------------|--------------------------------------------|---------|-----------|-----------|-----------|-----------|----|-----------------------------------------------------------------------------------------------------------------------------------------------------------------------------------------------------------------------------------------------------------------------------------|
| Cellular Component | GO:0070069 | cytochrome complex                         | 1/2341  | 34/19559  | 0.9869404 | 0.9999998 | 0.8965515 | 1  | NDUFA4L2                                                                                                                                                                                                                                                                          |
| Cellular Component | GO:0030532 | small nuclear ribonucleoprotein complex    | 6/2341  | 102/19559 | 0.9869593 | 0.9999998 | 0.8965515 | 6  | SNRPD3/LSM7/PRPF8/PRPF6/PRPF40B/GEMIN4                                                                                                                                                                                                                                            |
| Cellular Component | GO:0120114 | Sm-like protein family complex             | 7/2341  | 114/19559 | 0.9871671 | 0.9999998 | 0.8965515 | 7  | LSM1/SNRPD3/LSM7/PRPF8/PRPF6/PRPF40B/GEMIN4                                                                                                                                                                                                                                       |
| Cellular Component | GO:0036126 | sperm flagellum                            | 7/2341  | 115/19559 | 0.988142  | 0.9999998 | 0.8965515 | 7  | SPAG6/DNAJB13/CUL3/DEFB1/IQCG/DNAI2/PMFBP1                                                                                                                                                                                                                                        |
| Cellular Component | GO:0098802 | plasma membrane signaling receptor complex | 25/2341 | 307/19559 | 0.9883121 | 0.9999998 | 0.8965515 | 25 | ITGAE/CSF2RB/TRDV2/TRAF2/TRAF1/ITGA2B/PTPN6/GRIK4/IGF1R/ITGB5/CNIH2/HTR3A/CD79A/ITGB3/BMPRI1B/TRGV9/IL6R/ITGB2/INSRR/IL18RAP/GABBR1/SHANK2/IL18R1/GABBR2/ITGB6                                                                                                                    |
| Cellular Component | GO:0005743 | mitochondrial inner membrane               | 43/2341 | 489/19559 | 0.9904213 | 0.9999998 | 0.8965515 | 43 | SLC25A37/SLC25A25/BDH1/MRPL3/PAM16/FGR/NDUFAF6/SPG7/MRPL38/NDUFS2/FECH/CLU/SPHK2/PHB/MTG2/PGS1/NDUFS8/SFXN1/IMMT/LETM2/PPOX/MRPS21/MRPS26/TIMM44/NDUFB6/ABCB8/MRPL28/NDUFA4L2/BCL2L1/SDHD/AURKAIP1/COQ4/DHODH/CDS2/SLC25A1/TMEM14C/ACADVL/ATP5PD/RAB5IF/STMP1/COQ8B/DMAC1/ATP5MPL |
| Cellular Component | GO:0097729 | 9+2 motile cilium                          | 7/2341  | 120/19559 | 0.9920576 | 0.9999998 | 0.8965515 | 7  | SPAG6/DNAJB13/CUL3/DEFB1/IQCG/DNAI2/PMFBP1                                                                                                                                                                                                                                        |
| Cellular Component | GO:0097525 | spliceosomal snRNP complex                 | 5/2341  | 96/19559  | 0.9923956 | 0.9999998 | 0.8965515 | 5  | SNRPD3/LSM7/PRPF8/PRPF6/PRPF40B                                                                                                                                                                                                                                                   |
| Cellular Component | GO:0000788 | nuclear nucleosome                         | 1/2341  | 40/19559  | 0.9939315 | 0.9999998 | 0.8965515 | 1  | H3C1                                                                                                                                                                                                                                                                              |

|                    |            |                                     |         |           |           |           |           |    |                                                                                                                      |
|--------------------|------------|-------------------------------------|---------|-----------|-----------|-----------|-----------|----|----------------------------------------------------------------------------------------------------------------------|
| Cellular Component | GO:0000786 | nucleosome                          | 5/2341  | 108/19559 | 0.9974635 | 0.9999998 | 0.8965515 | 5  | SPHK2/KDM1B/MACROH2A2/H3C1/SLF1                                                                                      |
| Cellular Component | GO:0098798 | mitochondrial protein complex       | 18/2341 | 265/19559 | 0.9981391 | 0.9999998 | 0.8965515 | 18 | MRPL3/PAM16/SPG7/MRPL38/NDUFS2/PHB/NDUFS8/IMMT/BCKDHA/MRPS21/MRPS26/NDUFB6/MRPL28/NDUFA4L2/SDHD/ATP5PD/DMAC1/ATP5MPL |
| Cellular Component | GO:0044815 | DNA packaging complex               | 5/2341  | 116/19559 | 0.9988097 | 0.9999998 | 0.8965515 | 5  | SPHK2/KDM1B/MACROH2A2/H3C1/SLF1                                                                                      |
| Cellular Component | GO:0015935 | small ribosomal subunit             | 2/2341  | 74/19559  | 0.9991283 | 0.9999998 | 0.8965515 | 2  | MRPS21/MRPS26                                                                                                        |
| Cellular Component | GO:0031514 | motile cilium                       | 11/2341 | 199/19559 | 0.9993355 | 0.9999998 | 0.8965515 | 11 | SPAG6/DNAJB13/CUL3/DEFB1/IQCG/FBXL13/DAAM1/DNAI2/SPEF1/PMFBP1/CFAP61                                                 |
| Cellular Component | GO:0022625 | cytosolic large ribosomal subunit   | 1/2341  | 58/19559  | 0.999392  | 0.9999998 | 0.8965515 | 1  | RPL23A                                                                                                               |
| Cellular Component | GO:0015934 | large ribosomal subunit             | 4/2341  | 116/19559 | 0.9997145 | 0.9999998 | 0.8965515 | 4  | MRPL3/MRPL38/MRPL28/RPL23A                                                                                           |
| Cellular Component | GO:0045095 | keratin filament                    | 2/2341  | 95/19559  | 0.9999254 | 0.9999998 | 0.8965515 | 2  | KRTAP5-9/KRT7                                                                                                        |
| Cellular Component | GO:0042571 | immunoglobulin complex, circulating | 1/2341  | 76/19559  | 0.9999392 | 0.9999998 | 0.8965515 | 1  | IGHV6-1                                                                                                              |



|                    |            |                                            |          |           |           |           |           |     |                                                                                                                                                                                                                                                                                                                                                                                                                                                                                                                                                                                                                                                                                                                  |
|--------------------|------------|--------------------------------------------|----------|-----------|-----------|-----------|-----------|-----|------------------------------------------------------------------------------------------------------------------------------------------------------------------------------------------------------------------------------------------------------------------------------------------------------------------------------------------------------------------------------------------------------------------------------------------------------------------------------------------------------------------------------------------------------------------------------------------------------------------------------------------------------------------------------------------------------------------|
| Cellular Component | GO:0044391 | ribosomal subunit                          | 6/2341   | 187/19559 | 0.9999957 | 0.9999998 | 0.8965515 | 6   | MRPL3/MRPL38/MRPS21/MRPS26/MRPL28/RPL23A                                                                                                                                                                                                                                                                                                                                                                                                                                                                                                                                                                                                                                                                         |
| Cellular Component | GO:0042101 | T cell receptor complex                    | 3/2341   | 140/19559 | 0.9999966 | 0.9999998 | 0.8965515 | 3   | TRDV2/PTPN6/TRGV9                                                                                                                                                                                                                                                                                                                                                                                                                                                                                                                                                                                                                                                                                                |
| Cellular Component | GO:0005840 | ribosome                                   | 11/2341  | 270/19559 | 0.9999986 | 0.9999998 | 0.8965515 | 11  | MRPL3/LARP1/MRPL38/MTG2/SF1/MRPS21/MRPS26/MRPL28/EIF3H/RPL23A/AURKAIP1                                                                                                                                                                                                                                                                                                                                                                                                                                                                                                                                                                                                                                           |
| Cellular Component | GO:0022626 | cytosolic ribosome                         | 1/2341   | 110/19559 | 0.9999992 | 0.9999998 | 0.8965515 | 1   | RPL23A                                                                                                                                                                                                                                                                                                                                                                                                                                                                                                                                                                                                                                                                                                           |
| Cellular Component | GO:0019814 | immunoglobulin complex                     | 3/2341   | 163/19559 | 0.9999998 | 0.9999998 | 0.8965515 | 3   | IGLV3-10/IGHV6-1/CD79A                                                                                                                                                                                                                                                                                                                                                                                                                                                                                                                                                                                                                                                                                           |
| Molecular Function | GO:0003779 | actin binding                              | 103/2321 | 437/18352 | 1.58E-10  | 2.41E-07  | 2.27E-07  | 103 | MAEA/VILL/P4HB/PARVB/FMNL3/GAS7/SSH1/SNTB2/GSN/MYO18B/TTN/FGD4/TLN2/MYRIP/MYH11/SYNE1/SHROOM3/YWHAH/INF2/MYO9B/PSTPIP1/MSRB1/AFAP1/MYLK/CORO2A/WIPF1/CTTN/MEFV/ANXA6/STK38L/COTL1/CAPG/MYO18A/MICAL1/MSRB2/MICAL2/TNNT3/PRICKLE4/WHAMM/MICAL3/RUSC1/BAIAP2L1/MYOZ3/BIN1/PDLIM2/TNS1/MYH15/MYH9/SYNPO2L/ACTN1/CORO7/FMNL1/ACTN4/SSH3/PHACTR2/ABLIM3/WASL/TMOD3/EPSS8L3/SVIL/EPSS8L1/MYO5A/PFN1/EPB41L3/VPS18/MTSS1/ESPN/GMFB/CCIN/WDR1/SNTA1/SPTA1/SNTB1/VASH1/MYOM1/DAAM1/ADD1/SAMD14/NOD2/CORO1C/MYOT/PARVG/MAP1A/AVIL/PRKCE/FLII/MYO1C/FSCN3/SPTAN1/PDLIM4/SHROOM1/TMOD1/CYFIP1/ABLIM1/GMFG/EZR/SMTN/SPTBN4/SYNPO/DBNL/PRKN/MRTFA/ITPRID2                                                                      |
| Molecular Function | GO:0031267 | small GTPase binding                       | 101/2321 | 428/18352 | 2.21E-10  | 2.41E-07  | 2.27E-07  | 101 | ARHGEF10/EHD1/SORL1/FMNL3/TRIO/SH3BP5L/ANKFY1/FGD4/ELMO1/MYRIP/RHOH/ULK1/PLEKHG3/RIN2/DENND1A/AKAP13/INF2/MYO9B/ARHGDIB/DOCK1/TBC1D16/NDRG1/TGFBRAP1/ACAP2/RAB11FIP1/TBC1D2/TNPO1/CYFIP2/MICAL1/TBC1D10A/RCC1/IPO13/SH3BP5/FGD5/WHAMM/SPATA13/MICAL3/RIN3/DENND3/RABGEF1/CDC42EP1/ERC1/XPO7/FMNL1/PREX1/NCF2/XPO6/RALBP1/PLEKHG5/SPHK2/FARP1/RABGAP1L/DENND6B/BICD2/RAPGEF2/TBC1D22B/EPSS8L1/MYO5A/PFN1/CLEC16A/ABCA1/SH3BP4/RUSC2/SRGAP1/USP6NL/BCR/ARHGEF25/TBC1D14/NCKAP1/DAAM1/MICAL1/ARHGEF10L/TBC1D2B/ARHGEF18/SGSM2/CORO1C/RPH3A/STRIP1/DNM1L/TBC1D1/ARHGAP17/ARHGEF28/ARHGEF2/MYO1C/TSC2/ARHGEF15/YIPF1/HPS6/CDC42BPB/ARHGAP1/DOCK2/RGL3/RALGPS1/CYFIP1/RPH3AL/TBC1D22A/DAPK3/VAV3/PLEKHG2/CYRIB/DENND2B |
| Molecular Function | GO:0017016 | Ras GTPase binding                         | 98/2321  | 415/18352 | 3.94E-10  | 2.86E-07  | 2.70E-07  | 98  | ARHGEF10/EHD1/FMNL3/TRIO/SH3BP5L/ANKFY1/FGD4/ELMO1/MYRIP/RHOH/ULK1/PLEKHG3/RIN2/DENND1A/AKAP13/INF2/MYO9B/ARHGDIB/DOCK1/TBC1D16/NDRG1/TGFBRAP1/ACAP2/RAB11FIP1/TBC1D2/TNPO1/CYFIP2/MICAL1/TBC1D10A/RCC1/IPO13/SH3BP5/FGD5/WHAMM/SPATA13/MICAL3/RIN3/DENND3/RABGEF1/CDC42EP1/ERC1/XPO7/FMNL1/PREX1/NCF2/XPO6/RALBP1/PLEKHG5/SPHK2/FARP1/RABGAP1L/DENND6B/BICD2/RAPGEF2/TBC1D22B/EPSS8L1/MYO5A/PFN1/CLEC16A/SH3BP4/RUSC2/SRGAP1/USP6NL/BCR/ARHGEF25/TBC1D14/NCKAP1/DAAM1/MICAL1/ARHGEF10L/TBC1D2B/ARHGEF18/SGSM2/CORO1C/RPH3A/STRIP1/DNM1L/TBC1D1/ARHGAP17/ARHGEF28/ARHGEF2/MYO1C/ARHGEF15/YIPF1/HPS6/CDC42BPB/ARHGAP1/DOCK2/RGL3/RALGPS1/CYFIP1/RPH3AL/TBC1D22A/DAPK3/VAV3/PLEKHG2/CYRIB/DENND2B                  |
| Molecular Function | GO:0005085 | guanyl-nucleotide exchange factor activity | 57/2321  | 215/18352 | 2.78E-08  | 1.22E-05  | 1.15E-05  | 57  | ARHGEF10/ABR/TRIO/SH3BP5L/FGD4/ELMO1/CCDC88C/PLEKHG3/RIN2/DENND1A/DOCK6/AKAP13/RGL4/DOCK1/MCF2L2/ARHGEF7/TBC1D10A/RCC1/EIF2B5/SH3BP5/FGD5/ITSN1/SPATA13/RIN3/DENND3/RABGEF1/PREX1/DOCK8/PLEKHG5/FARP1/DENND6B/RAPGEF2/IQSEC1/EPSS8L1/MCF2L/SH2D3C/VAV2/BCR/ARHGEF25/ARHGEF39/DOCK10/ARHGEF10L/ARHGEF18/CYTH4/ARHGEF28/ARHGEF2/BCAR3/ARHGEF15/DOCK2/RGL3/RALGPS1/FBXO8/VAV3/EEF1D/PLEKHG2/DENND11/DENND2B                                                                                                                                                                                                                                                                                                         |

|                    |            |                                                |         |           |          |           |           |    |                                                                                                                                                                                                                                                                                                                                                                                                                                                                                                                                                       |
|--------------------|------------|------------------------------------------------|---------|-----------|----------|-----------|-----------|----|-------------------------------------------------------------------------------------------------------------------------------------------------------------------------------------------------------------------------------------------------------------------------------------------------------------------------------------------------------------------------------------------------------------------------------------------------------------------------------------------------------------------------------------------------------|
| Molecular Function | GO:0005096 | GTPase activator activity                      | 68/2321 | 275/18352 | 2.81E-08 | 1.22E-05  | 1.15E-05  | 68 | TBCD/ABR/SMAP2/RIN2/MYO9B/ARHGDI/DOCK1/ADAP1/TBC1D16/ARHGAP26/ACAP2/TBC1D2/ARRB1/SEC23B/TBC1D10A/ARHGAP31/RASAL2/RIN3/AGAP1/ARAP1/GIT1/RGS6/RASA3/PREX1/VPS9D1/WNT11/ASAP1/RALBP1/SYNGAP1/RGS12/RABGAP1L/RAPGEF2/TBC1D22B/NF1/RGS17/ASAP2/SRGAP1/USP6NL/BCR/SIPA1L1/PLCB1/ARHGAP25/TBC1D14/SIPA1L2/RGS3/ARHGEF10L/GARNL3/TBC1D2B/SGSM2/DNM1L/TBC1D1/ARHGAP17/ARHGAP15/RGS10/TSC2/ARHGEF15/CHN2/ARHGAP1/ARHGAP8/DOCK2/ARHGAP12/ARHGAP10/RAP1GAP2/TBC1D22A/VAV3/ARHGAP23/NPRL2/ARHGAP45                                                                 |
| Molecular Function | GO:0030695 | GTPase regulator activity                      | 72/2321 | 307/18352 | 1.10E-07 | 4.00E-05  | 3.78E-05  | 72 | TBCD/ABR/SMAP2/RHOH/RIN2/MYO9B/ARHGDI/DOCK1/ADAP1/ITGB1BP1/TBC1D16/ARHGAP26/ACAP2/TBC1D2/ARRB1/SEC23B/TBC1D10A/ARHGAP31/RASAL2/RIN3/AGAP1/ARAP1/GIT1/RGS6/RASA3/PREX1/VPS9D1/WNT11/ASAP1/RALBP1/WASL/SYNGAP1/RGS12/RABGAP1L/RAPGEF2/TBC1D22B/NF1/RGS17/ASAP2/SH3BP4/SRGAP1/USP6NL/BCR/SIPA1L1/PLCB1/ARHGAP25/TBC1D14/SIPA1L2/RGS3/ARHGEF10L/GARNL3/TBC1D2B/SGSM2/DNM1L/TBC1D1/ARHGAP17/ARHGAP15/RGS10/TSC2/ARHGEF15/CHN2/ARHGAP1/ARHGAP8/DOCK2/ARHGAP12/ARHGAP10/RAP1GAP2/TBC1D22A/VAV3/ARHGAP23/NPRL2/ARHGAP45                                       |
| Molecular Function | GO:0017048 | Rho GTPase binding                             | 45/2321 | 162/18352 | 1.83E-07 | 5.70E-05  | 5.38E-05  | 45 | ARHGEF10/FMNL3/TRIO/FGD4/ELMO1/RHOH/PLEKHG3/AKAP13/INF2/MYO9B/ARHGDI/DOCK1/CYFIP2/FGD5/WHAMM/SPATA13/CDC42EP1/FMNL1/PREX1/NCF2/RALBP1/PLEKHG5/FARP1/EP58L1/PFN1/SRGAP1/BCR/ARHGEF25/NCKAP1/DAAM1/ARHGEF10L/ARHGEF18/CORO1C/STRIP1/ARHGAP17/ARHGEF28/ARHGEF2/ARHGEF15/CDC42BPB/DOCK2/CYFIP1/DAPK3/VAV3/PLEKHG2/CYRIB                                                                                                                                                                                                                                   |
| Molecular Function | GO:0060589 | nucleoside-triphosphatase regulator activity   | 78/2321 | 348/18352 | 2.46E-07 | 6.70E-05  | 6.32E-05  | 78 | TBCD/ABR/SMAP2/RHOH/RIN2/MYO9B/ARHGDI/DOCK1/ADAP1/ITGB1BP1/TBC1D16/ARHGAP26/ACAP2/TBC1D2/ARRB1/SEC23B/TBC1D10A/ARHGAP31/RASAL2/RIN3/AGAP1/ARAP1/GIT1/HSCB/RGS6/RASA3/PREX1/VPS9D1/WNT11/ASAP1/RALBP1/WASL/SYNGAP1/RGS12/RABGAP1L/RAPGEF2/TBC1D22B/NF1/PFN1/RGS17/ASAP2/DNAJB6/SH3BP4/SRGAP1/USP6NL/BCR/SIPA1L1/PLCB1/ARHGAP25/TBC1D14/FNIP2/SIPA1L2/RGS3/ARHGEF10L/GARNL3/TBC1D2B/SGSM2/DNM1L/TBC1D1/ARHGAP17/ARHGAP15/RGS10/TSC2/ARHGEF15/CHN2/ARHGAP1/ARHGAP8/DOCK2/ARHGAP12/ARHGAP10/BAG5/RAP1GAP2/TBC1D22A/VAV3/ARHGAP23/NPRL2/AHSA2P/ARHGAP45    |
| Molecular Function | GO:0005088 | Ras guanyl-nucleotide exchange factor activity | 35/2321 | 115/18352 | 3.89E-07 | 9.40E-05  | 8.88E-05  | 35 | ARHGEF10/TRIO/SH3BP5L/FGD4/PLEKHG3/RIN2/DENND1A/AKAP13/DOCK1/RCC1/SH3BP5/FGD5/SPATA13/RIN3/DENND3/RABGEF1/PREX1/PLEKHG5/FARP1/DENND6B/RAPGEF2/EP58L1/BCR/ARHGEF25/ARHGEF10L/ARHGEF18/ARHGEF28/ARHGEF2/ARHGEF15/DOCK2/RGL3/RALGPS1/VAV3/PLEKHG2/DENND2B                                                                                                                                                                                                                                                                                                |
| Molecular Function | GO:0140297 | DNA-binding transcription factor binding       | 76/2321 | 347/18352 | 9.08E-07 | 0.0001976 | 0.0001866 | 76 | HDAC4/ZFPM1/RXRA/FOXP1/CALR/PPARG/NR1I2/CTDP1/NCOR2/CREB1/MEF2D/HDAC7/YWHAH/PRMT2/SKI/ZMYND8/VDR/SMAD3/ARRB1/HIPK2/PADI2/JUP/AIP/DLL1/RBPJ/ZNF366/TCF12/ACTN4/TCF7L2/TAF10/HDAC1/CPNE1/CRTC3/RERG/DGKQ/PRKCB/TLE1/MTA1/CTBP1/MED13/TGFB111/NR1H2/CTBP2/KDM4C/RARG/RUNX2/NCOA1/BCL10/CREBBP/MTA2/NFE2L2/ARNTL/PRDM16/NEK6/ANKRD2/RB1/BCL2/TCF3/RNF25/TP53BP1/MED25/MEF2C/IKZF4/FHL2/USF2/TP53BP2/TRIP12/CEBPB/RNF14/PRPF6/HHEX/NCOA2/ANKRD1/RELA/DAPK3/COMMD6                                                                                          |
| Molecular Function | GO:0005089 | Rho guanyl-nucleotide exchange factor activity | 22/2321 | 60/18352  | 1.81E-06 | 0.0003582 | 0.0003382 | 22 | ARHGEF10/TRIO/FGD4/PLEKHG3/AKAP13/DOCK1/FGD5/SPATA13/PREX1/PLEKHG5/FARP1/EP58L1/BCR/ARHGEF25/ARHGEF10L/ARHGEF18/ARHGEF28/ARHGEF2/ARHGEF15/DOCK2/VAV3/PLEKHG2                                                                                                                                                                                                                                                                                                                                                                                          |
| Molecular Function | GO:0071889 | 14-3-3 protein binding                         | 15/2321 | 32/18352  | 2.20E-06 | 0.0003996 | 0.0003773 | 15 | FOXK1/PRKCZ/KSR1/RPTOR/KIF13B/HDAC7/SRPK2/TMCC3/HLA-F/TBC1D22B/ARRB2/PRKCE/YWHAQ/TBC1D22A/RIPOR1                                                                                                                                                                                                                                                                                                                                                                                                                                                      |
| Molecular Function | GO:0004674 | protein serine/threonine kinase activity       | 89/2321 | 435/18352 | 2.39E-06 | 0.0003996 | 0.0003774 | 89 | PRKCZ/LTBP1/KSR1/AATK/PRKAG2/LMTK2/BRD4/MARK3/VRK2/MAST4/DYRK4/TRIO/LIMK2/CDKL1/RPS6KA1/TTN/CSNK1D/MAP3K3/ULK1/HIPK3/MAP2K6/AKAP13/ERN1/AAK1/MYLK/SRPK2/PRKCA/STK38L/SGK1/HIPK2/RPS6KA2/CAMKK2/MOK/TGFBR2/TNIK/TRPM6/RIPK1/AKT3/STK35/CAMKK1/CDK14/RPS6KA4/PRKAB1/ILK/LATS2/GRK6/PRKCH/CLK3/PRKCB/GRK5/RIPK3/STK24/LRRK1/DYRK2/SIK3/CAMK1D/TESK2/BMPR1B/CAB39/STK3/CSNK1E/BCR/MKNK1/CDKL4/MAP3K14/PRKCI/ENG/TAOK3/NEK6/IRAK2/DAPK2/STK36/CDKL3/PRKCE/GRK7/CHEK2/MAPKAPK3/NEK3/FAM20C/CDC42BPB/STK32C/MARK2/SGK2/RIOK1/DAPK3/CDK13/PRKAA1/GRK2/MAP3K20 |

|                    |            |                                                                     |         |           |           |           |           |    |                                                                                                                                                                                                                                                                                                                                                                                                                                                                                                                                                                            |
|--------------------|------------|---------------------------------------------------------------------|---------|-----------|-----------|-----------|-----------|----|----------------------------------------------------------------------------------------------------------------------------------------------------------------------------------------------------------------------------------------------------------------------------------------------------------------------------------------------------------------------------------------------------------------------------------------------------------------------------------------------------------------------------------------------------------------------------|
| Molecular Function | GO:0017137 | Rab GTPase binding                                                  | 42/2321 | 172/18352 | 1.66E-05  | 0.0025766 | 0.002433  | 42 | EHD1/SH3BP5L/ANKFY1/MYRIP/ULK1/RIN2/DENND1A/TBC1D16/NDRG1/TGFBRAP1/ACAP2/RAB11FIP1/TBC1D2/MICAL1/TBC1D10A/SH3BP5/MICAL3/RIN3/DENND3/RABGEF1/ERC1/RABGAP1L/DENND6B/BICD2/TBC1D22B/MYOSA/CLEC16A/RUSC2/USP6NL/TBC1D14/MICALL1/TBC1D2B/SGSM2/RPH3A/DNM1L/TBC1D1/YIPF1/HPS6/ARHGAP1/RPH3AL/TBC1D22A/DENND2B                                                                                                                                                                                                                                                                    |
| Molecular Function | GO:0005543 | phospholipid binding                                                | 88/2321 | 454/18352 | 2.45E-05  | 0.0035574 | 0.0033591 | 88 | VILL/CPNE6/OSBPL5/PLA2G15/GSN/PCYT1A/CPNE2/ITPR2/ANKFY1/DENND1A/ADAP1/NCF4/ARHGAP26/ACAP2/GAB2/PIGU/PLD1/CPNE5/ANXA6/SNX27/CAPG/ABCG1/SH3PXD2B/WIPI2/ITPR1/PACSIN2/AGAP1/PLTP/ARAP1/ZCCHC14/BIN1/THBS1/PITPNM2/SNX3/ATP8B1/PITPNM1/PREX1/CPNE1/ASAP1/PITPNA/SNX11/NISCH/RAPGEF2/EPN2/SH3YL1/SMURF1/RUFY4/SVIL/GRK5/NF1/MCF2L/PFN1/PHF12/PCTP/ABCA1/PLEKHA2/NUMA1/DGKA/PLCB1/OSBPL10/SNX18/KCNQ1/PRKCI/ZFYVE19/DAPP1/MICALL1/SYT16/RPH3A/AVIL/SYT17/FLII/PITPNC1/WDFY1/DYSF/SDCBP2/EPN3/ESYT1/PHLDA1/BAIAP2L2/NR5A2/SPTBN4/ANXA7/ZFYVE9/C2CD2L/BSCL2/CEACAM5/GRAMD2A/RUBCNL |
| Molecular Function | GO:0045296 | cadherin binding                                                    | 67/2321 | 332/18352 | 6.29E-05  | 0.0085581 | 0.0080812 | 67 | S100P/EHD1/BSG/ENO1/STX5/CSNK1D/TJP2/NDRG1/TBC1D2/CTTN/CAPG/CDH23/TBC1D10A/HDLBP/LARP1/RTN4/PACSIN2/JUP/BAIAP2L1/PKP1/CDC42EP1/LRRC59/MYH9/ERC1/BAIAP2/AHNAK/SLC9A3R2/EPS15L1/ASAP1/CDH3/PTPRJ/TMOD3/EPN2/EPS8L1/STK24/PFN1/NUMB/OLFM4/SH3GL1/CDH4/UNC45A/YWHAZ/ARGLU1/CDH1/ADD1/MICALL1/PKM/MPP7/PI4KA/EFHD2/EPS15/SND1/SPTAN1/ARHGAP1/MARK2/RUVBL1/RPL23A/CDH11/PDXDC1/EZR/LYPLA2/EEF1D/DBNL/PPL/SEPTIN9/CEMIP2/H3C1                                                                                                                                                     |
| Molecular Function | GO:0051015 | actin filament binding                                              | 46/2321 | 206/18352 | 7.45E-05  | 0.0095364 | 0.009005  | 46 | VILL/FMNL3/GAS7/GSN/TTN/TLN2/MYH11/SYNE1/SHROOM3/PSTPIP1/CORO2A/CTTN/ANXA6/COTL1/CAPG/MYO18A/MICAL1/BIN1/MYH15/MYH9/ACTN1/CORO7/FMNL1/ACTN4/ABLIM3/SVIL/MYOSA/ESPN/CCIN/WDR1/SPTA1/MYOM1/ADD1/SAMD14/CORO1C/AVIL/FLII/MYO1C/FSCN3/SHROOM1/TMOD1/CYFIP1/ABLIM1/EZR/DBNL/ITPRID2                                                                                                                                                                                                                                                                                             |
| Molecular Function | GO:0061629 | RNA polymerase II-specific DNA-binding transcription factor binding | 56/2321 | 267/18352 | 8.37E-05  | 0.0101211 | 0.009557  | 56 | ZFPM1/RXRA/FOXP1/CALR/PPARG/NR1I2/CTDP1/NCOR2/CREB1/YWHAH/PRMT2/VDR/SMAD3/ARRB1/HIPK2/PADI2/JUP/AIP/DLL1/RBPJ/ZNF366/ACTN4/TCF7L2/TAF10/HDAC1/CPNE1/RERG/PRKCB/MTA1/MED13/TGFB11/NR1H2/CTBP2/KDM4C/RARG/NCOA1/BCL10/CREBBP/MTA2/NFE2L2/ARNTL/ANKRD2/RB1/TCF3/RNF25/TP53BP1/MED25/TP53BP2/TRIP12/CEBPB/RNF14/PRPF6/NCOA2/ANKRD1/RELA/COMMD6                                                                                                                                                                                                                                 |
| Molecular Function | GO:0003712 | transcription coregulator activity                                  | 92/2321 | 498/18352 | 0.0001046 | 0.0115642 | 0.0109197 | 92 | ELANE/HDAC4/ARID5B/BRD4/MAML3/SERTAD2/NCOR2/SRCAP/HDAC7/SIN3B/URI1/PRMT2/MAML1/ZMYND8/ARRB1/SUFU/MAML2/BCL11A/HIPK2/E2F7/CBFA2T3/JUP/AIP/CDYL/ACTN1/ZNF366/CAMTA1/ACTN4/SMARCA2/LIMD1/HDAC1/PXN/ZMIZ1/PHB/MED13L/ENY2/PRKCB/TLE1/SS18L2/KMT2D/MTA1/SF1/RIPK3/CTBP1/SFMBT2/COPSS/SCAND1/MED13/ARID1B/TGFB11/PHF12/CREG1/WWTR1/ATF7IP/CTBP2/CAMTA2/NCOA1/BCL10/MEIS2/CREBBP/RSF1/MTA2/SMARCD1/PRDM16/MED8/PER2/SMARCD2/NOTCH1/TP53BP1/RBPMS/SUB1/FHL2/MED12L/UBE3A/ATN1/CRYM/RNF14/PRPF6/SND1/NCOA2/ANKRD1/RUVBL1/KCTD1/NCOA4/LPIN1/KAT7/PARP10/PARP9/RALY/PRKN/NSD3/MRTFA   |
| Molecular Function | GO:0008525 | phosphatidylcholine transporter activity                            | 7/2321  | 11/18352  | 0.0001063 | 0.0115642 | 0.0109197 | 7  | ABCG1/PLTP/PITPNM2/PITPNM1/PITPNA/PCTP/ABCA1                                                                                                                                                                                                                                                                                                                                                                                                                                                                                                                               |
| Molecular Function | GO:0005548 | phospholipid transporter activity                                   | 16/2321 | 48/18352  | 0.0001696 | 0.017573  | 0.0165937 | 16 | OSBPL5/MFSD2A/TMEM30A/ABCG1/ANO7/PLTP/PITPNM2/ATP8B1/PITPNM1/PITPNA/PCTP/ABCA1/OSBPL10/PITPNC1/ANO6/C2CD2L                                                                                                                                                                                                                                                                                                                                                                                                                                                                 |
| Molecular Function | GO:0005161 | platelet-derived growth factor receptor binding                     | 8/2321  | 15/18352  | 0.0001821 | 0.0180125 | 0.0170087 | 8  | ERN1/IL1R1/PTPRJ/PDGFD/ITGB3/PDGFB/PDGFC/PDGFRB                                                                                                                                                                                                                                                                                                                                                                                                                                                                                                                            |

|                    |            |                                             |         |           |           |           |           |    |                                                                                                                                                                                                                                                                                                                                          |
|--------------------|------------|---------------------------------------------|---------|-----------|-----------|-----------|-----------|----|------------------------------------------------------------------------------------------------------------------------------------------------------------------------------------------------------------------------------------------------------------------------------------------------------------------------------------------|
| Molecular Function | GO:0008526 | phosphatidylinositol transfer activity      | 6/2321  | 9/18352   | 0.0002427 | 0.0229596 | 0.0216801 | 6  | PLTP/PITPNM2/PITPNM1/PITPNA/PITPNC1/C2CD2L                                                                                                                                                                                                                                                                                               |
| Molecular Function | GO:0016922 | nuclear receptor binding                    | 26/2321 | 101/18352 | 0.000262  | 0.023757  | 0.022433  | 26 | RXRA/FOXP1/CALR/PPARG/NR1I2/NCOR2/YWHAH/PRMT2/VDR/SMAD3/ARRB1/PADI2/ZNF366/TAF10/RERG/PRKCB/TGFB1I1/NR1H2/KDM4C/RARG/NCOA1/MED25/CEBPB/RNF14/PRPF6/NCOA2                                                                                                                                                                                 |
| Molecular Function | GO:0001221 | transcription cofactor binding              | 16/2321 | 51/18352  | 0.0003725 | 0.0324211 | 0.0306144 | 16 | CREB1/SMAD3/VGLL4/NFATC1/BAIAP2/ZBTB17/PHF12/NFE2L2/NEK6/PER2/PER1/MED25/ZBTB49/FOXO1/TEAD2/RELA                                                                                                                                                                                                                                         |
| Molecular Function | GO:0035091 | phosphatidylinositol binding                | 52/2321 | 262/18352 | 0.0005948 | 0.0497765 | 0.0470025 | 52 | VILL/OSBPL5/GSN/ITPR2/ANKFY1/DENND1A/ADAP1/NCF4/ACAP2/GAB2/PIGU/PLD1/SNX27/CAPG/SH3PXD2B/WIPI2/ITPR1/ARAP1/ZCCHC14/PITPNM2/SNX3/PITPNM1/ASAP1/PITPNA/SNX11/NISCH/SH3YL1/RUFY4/SVIL/MCF2L/PFN1/PHF12/PLEKHA2/NUMA1/PLCB1/SNX18/KCNQ1/ZFYVE19/DAPP1/RPH3A/AVIL/FLII/PITPNC1/WDFY1/SDCBP2/ESYT1/PHLDA1/ZFYVE9/C2CD2L/CEACAM5/GRAMD2A/RUBCNL |
| Molecular Function | GO:0005178 | integrin binding                            | 32/2321 | 144/18352 | 0.0009455 | 0.0734769 | 0.0693822 | 32 | P4HB/TIMP2/CALR/CD9/TLN2/CD177/ITGB1BP1/TGFBI/PRKCA/THBS1/MYH9/CD226/ACTN1/ACTN4/TNXB/ILK/ESM1/PXN/ITGB5/NISCH/ADAMTS13/JAM3/ITGB3/ITGB2/S1PR2/COL5A1/ICAM5/ITGB6/ANXA7/JAML/PLPP3/CCN4                                                                                                                                                  |
| Molecular Function | GO:0035257 | nuclear hormone receptor binding            | 32/2321 | 144/18352 | 0.0009455 | 0.0734769 | 0.0693822 | 32 | RXRA/FOXP1/CALR/PPARG/NR1I2/NCOR2/YWHAH/PRMT2/VDR/SMAD3/ARRB1/PADI2/JUP/ZNF366/ACTN4/TCF7L2/TAF10/RERG/PRKCB/MED13/TGFB1I1/NR1H2/CTBP2/KDM4C/RARG/NCOA1/MED25/TRIP12/CEBPB/RNF14/PRPF6/NCOA2                                                                                                                                             |
| Molecular Function | GO:0042974 | retinoic acid receptor binding              | 10/2321 | 27/18352  | 0.00112   | 0.0807281 | 0.0762293 | 10 | PPARG/NCOR2/PRMT2/VDR/ACTN4/NR1H2/CTBP2/RARG/NCOA1/MED25                                                                                                                                                                                                                                                                                 |
| Molecular Function | GO:0016279 | protein-lysine N-methyltransferase activity | 17/2321 | 61/18352  | 0.0011284 | 0.0807281 | 0.0762293 | 17 | METTL21A/ASH2L/SETD2/SMYD3/EHMT2/WDR82/KMT2D/SETD1B/SETD1A/METTL22/PRDM16/MECOM/EEF1AKMT3/EEF1AKMT2/NSD3/NSD2/CSKMT                                                                                                                                                                                                                      |
| Molecular Function | GO:0030674 | protein-macromolecule adaptor activity      | 48/2321 | 244/18352 | 0.0011501 | 0.0807281 | 0.0762293 | 48 | KSR1/RPTOR/LAT/AP2A1/STX5/VTI1A/ARRDC5/TJP2/AKAP13/PIK3R1/AMFR/GAB2/FRMD4A/GATAD2A/ARRB1/TRAF2/NCK2/FBXO7/DEDD2/JUP/STON1/DOK2/MYH9/CUX1/BAIAP2/CYL/SLC9A3R2/BICD2/AXIN1/TRIM5/EPB41L3/VPS18/COL14A1/MAPK8IP2/AP1G2/MPP7/MAP1A/SHANK2/FSCN3/ANK2/BCL3/PDZK1/POLD3/SPTBN4/TSNARE1/ERCC2/TEX261/SLA2                                       |

|                    |            |                                                                                           |         |           |           |           |           |    |                                                                                                                                                                                                                                                                                                                                                                              |
|--------------------|------------|-------------------------------------------------------------------------------------------|---------|-----------|-----------|-----------|-----------|----|------------------------------------------------------------------------------------------------------------------------------------------------------------------------------------------------------------------------------------------------------------------------------------------------------------------------------------------------------------------------------|
| Molecular Function | GO:0060090 | molecular adaptor activity                                                                | 59/2321 | 316/18352 | 0.0013005 | 0.0884338 | 0.0835056 | 59 | KSR1/RPTOR/LAT/AP2A1/STX5/VTI1A/ARRDC5/TJP2/AKAP13/PIK3R1/AMFR/GAB2/FRMD4A/GATAD2A/ARRB1/TRAF2/NCK2/FBXO7/DEDD2/ITSN1/JUP/STON1/DISC1/DOK2/MYH9/CUX1/BAIAP2/CDYL/AKAP5/SLC9A3R2/SCIMP/DLGAP4/BICD2/AXIN1/TRIM5/EPB41L3/VPS18/PDE4DIP/COL14A1/MAPK8IP2/SMARCD1/ARRB2/AP1G2/MPP7/MAP1A/SHANK2/FSCN3/ANK2/BCL3/PDZK1/POLD3/SPTBN4/TSNARE1/ERCC2/EIF4G1/TEX261/SEPTIN9/PAXX/SLA2 |
| Molecular Function | GO:0016278 | lysine N-methyltransferase activity                                                       | 17/2321 | 62/18352  | 0.0013744 | 0.0906264 | 0.085576  | 17 | METTL21A/ASH2L/SETD2/SMYD3/EHMT2/WDR82/KMT2D/SETD1B/SETD1A/METTL22/PRDM16/MECOM/EEF1AKMT3/EEF1AKMT2/NSD3/NSD2/CSKMT                                                                                                                                                                                                                                                          |
| Molecular Function | GO:0048365 | Rac GTPase binding                                                                        | 19/2321 | 73/18352  | 0.0014597 | 0.0934202 | 0.0882142 | 19 | ELMO1/ARHGDI1B/CYFIP2/SPATA13/FMN1/PREX1/NCF2/RALBP1/FARP1/EPSS8L1/SRGA1/NCKAP1/CORO1C/ARHGAP17/ARHGEF2/DOCK2/CYFIP1/VAV3/CYRIB                                                                                                                                                                                                                                              |
| Molecular Function | GO:0003713 | transcription coactivator activity                                                        | 51/2321 | 267/18352 | 0.0016136 | 0.1003181 | 0.0947276 | 51 | ARID5B/MAML3/SERTAD2/SRCAP/PRMT2/MAML1/ARRB1/MAML2/HIPK2/JUP/AIP/ACTN1/ACTN4/SMARCA2/ZMIZ1/ENY2/PRKCB/SS18L2/KMT2D/MTA1/RIPK3/COP55/SCAND1/ME D13/ARID1B/TGFB11/WWTR1/CTBP2/CAMTA2/NCOA1/BCL10/CREBBP/MTA2/SMARCD1/PRDM16/PER2/SMARCD2/NOTCH1/RBPMS/SUB1/MED12L/UBE3A/RNF14/PRPF6/NCOA2/A NKRD1/RUVBL1/NCOA4/LPIN1/NSD3/MRTFA                                                |
| Molecular Function | GO:0017124 | SH3 domain binding                                                                        | 29/2321 | 131/18352 | 0.001699  | 0.1026922 | 0.0969694 | 29 | SYNJ2/ELMO1/DENND1A/INPP5D/DOCK1/SH3BP2/AFAP1/WIPF1/DNM2/MICAL1/SH3BP5/ARHGAP31/PTPN6/ILK/UVRAG/AKAP5/SYNGAP1/ESPN/SH3GL1/DNM1/SHANK2/ARHGAP1 7/CNTNAP1/EPS15/TP53BP2/RUFY1/ARHGAP1/MVB12A/PRKN                                                                                                                                                                              |
| Molecular Function | GO:0031690 | adrenergic receptor binding                                                               | 8/2321  | 20/18352  | 0.0019862 | 0.1046874 | 0.0988534 | 8  | PDE4D/ARRB1/AKAP5/RAPGEF2/SH3GL1/ARRB2/NEDD4/GRK2                                                                                                                                                                                                                                                                                                                            |
| Molecular Function | GO:0003987 | acetate-CoA ligase activity                                                               | 3/2321  | 3/18352   | 0.0020206 | 0.1046874 | 0.0988534 | 3  | ACSS1/ACSS2/ACSS3                                                                                                                                                                                                                                                                                                                                                            |
| Molecular Function | GO:0030613 | oxidoreductase activity, acting on phosphorus or arsenic in donors                        | 3/2321  | 3/18352   | 0.0020206 | 0.1046874 | 0.0988534 | 3  | GSTO1/GLRX2/GSTO2                                                                                                                                                                                                                                                                                                                                                            |
| Molecular Function | GO:0030614 | oxidoreductase activity, acting on phosphorus or arsenic in donors, disulfide as acceptor | 3/2321  | 3/18352   | 0.0020206 | 0.1046874 | 0.0988534 | 3  | GSTO1/GLRX2/GSTO2                                                                                                                                                                                                                                                                                                                                                            |

|                    |            |                                               |         |           |           |           |           |    |                                                                                                                                                                                                                                                               |
|--------------------|------------|-----------------------------------------------|---------|-----------|-----------|-----------|-----------|----|---------------------------------------------------------------------------------------------------------------------------------------------------------------------------------------------------------------------------------------------------------------|
| Molecular Function | GO:0070644 | vitamin D response element binding            | 3/2321  | 3/18352   | 0.0020206 | 0.1046874 | 0.0988534 | 3  | RXRA/VDR/TCF3                                                                                                                                                                                                                                                 |
| Molecular Function | GO:0106006 | cytoskeletal protein-membrane anchor activity | 3/2321  | 3/18352   | 0.0020206 | 0.1046874 | 0.0988534 | 3  | JUP/EPB41L3/SPTBN4                                                                                                                                                                                                                                            |
| Molecular Function | GO:0001223 | transcription coactivator binding             | 10/2321 | 29/18352  | 0.0020963 | 0.1060816 | 0.1001699 | 10 | CREB1/SMAD3/VGLL4/NFATC1/ZBTB17/MED25/ZBTB49/FOXO1/TEAD2/RELA                                                                                                                                                                                                 |
| Molecular Function | GO:0004713 | protein tyrosine kinase activity              | 29/2321 | 135/18352 | 0.0027348 | 0.1352491 | 0.127712  | 29 | AATK/NRP2/DYRK4/BAZ1B/TTN/LCK/HIPK3/MAP2K6/FGR/CSF1R/EPHB3/HIPK2/CAMKK2/SLA/IGF1R/FLT1/JAK1/FGFR1/FER/CLK3/DYRK2/BLK/TESK2/CSK/CRIM1/NTRK1/INSRR/PDGF RB/TYRO3                                                                                                |
| Molecular Function | GO:0000287 | magnesium ion binding                         | 42/2321 | 217/18352 | 0.0030799 | 0.1489287 | 0.1406293 | 42 | S100P/NLRC4/ENO1/MAST4/RPS6KA1/XXYL1/ADCY2/MOV10L1/ERN1/SRPK2/RHEB/STK38L/ATP8A1/RPS6KA2/PGP/TESC/COMT/ATP11A/ATP8B1/NUDT3/RPS6KA4/ENOSF1/MTG2/ENO3/DYRK2/SIK3/STK3/PDXK/ATP8B4/NEK6/PI4K2A/PKM/DIS3L2/HMGCL/CIB4/CDC42BPB/MARK2/LHPP/PPM1N/CERK/YDJC/MAP3K20 |
| Molecular Function | GO:0008093 | cytoskeletal anchor activity                  | 8/2321  | 22/18352  | 0.0039968 | 0.1890652 | 0.1785291 | 8  | NCK2/JUP/BAIAP2/BICD2/EPB41L3/MAP1A/ANK2/SPTBN4                                                                                                                                                                                                               |
| Molecular Function | GO:0070491 | repressing transcription factor binding       | 18/2321 | 74/18352  | 0.0042601 | 0.1953094 | 0.1844253 | 18 | HDAC4/PPARG/HDAC7/SKI/ZMYND8/RBPJ/TCF7L2/HDAC1/TLE1/MTA1/CTBP1/RUNX2/MTA2/ARNTL/BCL2/TCF3/HHEX/RELA                                                                                                                                                           |
| Molecular Function | GO:0033613 | activating transcription factor binding       | 19/2321 | 80/18352  | 0.0044741 | 0.1953094 | 0.1844253 | 19 | HDAC4/ZFPM1/PPARG/CREB1/MEF2D/HDAC7/SMAD3/HIPK2/HDAC1/DGKQ/CREBBP/NFE2L2/PRDM16/NEK6/RB1/TCF3/TP53BP1/MEF2C/RELA                                                                                                                                              |
| Molecular Function | GO:0051427 | hormone receptor binding                      | 35/2321 | 177/18352 | 0.0045719 | 0.1953094 | 0.1844253 | 35 | RXRA/FOXP1/CALR/PPARG/NR1I2/NCOR2/YWHAH/PRMT2/VDR/SMAD3/ARRB1/PADI2/JUP/ZNF366/ACTN4/TCF7L2/TAF10/JAK1/RERG/PRKCB/MED13/TGFB111/NR1H2/CTBP2/KDM4C/RARG/NCOA1/GNAO1/MED25/NPPC/TRIP12/CEBPB/RNF14/PRPF6/NCOA2                                                  |

|                    |            |                                                            |         |          |           |           |           |    |                                                                                                                    |
|--------------------|------------|------------------------------------------------------------|---------|----------|-----------|-----------|-----------|----|--------------------------------------------------------------------------------------------------------------------|
| Molecular Function | GO:0046965 | retinoid X receptor binding                                | 7/2321  | 18/18352 | 0.0045776 | 0.1953094 | 0.1844253 | 7  | PPARG/NCOR2/VDR/NR1H2/RARG/NCOA1/MED25                                                                             |
| Molecular Function | GO:0070064 | proline-rich region binding                                | 7/2321  | 18/18352 | 0.0045776 | 0.1953094 | 0.1844253 | 7  | ITSN1/BAIAP2L1/BAIAP2/PFN1/CSK/NEDD4/CYLD                                                                          |
| Molecular Function | GO:0019210 | kinase inhibitor activity                                  | 17/2321 | 69/18352 | 0.0046888 | 0.1962091 | 0.1852749 | 17 | RPTOR/SPRED2/PRKAG2/SH3BP5L/ITPRIP/RHOH/PPP1R1B/PRKAR1B/SH3BP5/TESC/PRKRIP1/GMFB/TAOK3/DUS2/TRIB1/HEXIM1/GMFG      |
| Molecular Function | GO:0045309 | protein phosphorylated amino acid binding                  | 14/2321 | 53/18352 | 0.0050942 | 0.2082267 | 0.1966228 | 14 | LCK/SH3BP2/PIK3R1/ARRB1/FGR/NCK2/SHB/PTPN6/SHF/PFN1/VAV2/SCAF8/BCAR3/NEDD4                                         |
| Molecular Function | GO:0035258 | steroid hormone receptor binding                           | 19/2321 | 81/18352 | 0.0051674 | 0.2082267 | 0.1966228 | 19 | FOXP1/CALR/PPARG/NCOR2/YWHAH/PRMT2/SMAD3/ARRB1/PADI2/ZNF366/TAF10/RERG/PRKCB/TGFB1I1/KDM4C/NCOA1/CEBPB/RNF14/PRPF6 |
| Molecular Function | GO:0009931 | calcium-dependent protein serine/threonine kinase activity | 8/2321  | 23/18352 | 0.0054584 | 0.2120971 | 0.2002774 | 8  | PRKCZ/PRKCA/PRKCH/PRKCB/MKNK1/PRKCI/PRKCE/MAPKAPK3                                                                 |
| Molecular Function | GO:0038187 | pattern recognition receptor activity                      | 8/2321  | 23/18352 | 0.0054584 | 0.2120971 | 0.2002774 | 8  | TLR9/COLEC12/MARCO/FCN1/TRIM5/PGLYRP1/NOD2/PGLYRP4                                                                 |
| Molecular Function | GO:0042054 | histone methyltransferase activity                         | 15/2321 | 59/18352 | 0.0056138 | 0.2143111 | 0.2023681 | 15 | PRMT2/ASH2L/SETD2/SMYD3/EHMT2/WDR82/KMT2D/SETD1B/SETD1A/PRDM16/NTMT1/FBL/MECOM/NSD3/NSD2                           |
| Molecular Function | GO:0004860 | protein kinase inhibitor activity                          | 16/2321 | 65/18352 | 0.0060378 | 0.2231261 | 0.2106918 | 16 | RPTOR/SPRED2/PRKAG2/SH3BP5L/ITPRIP/PPP1R1B/PRKAR1B/SH3BP5/TESC/PRKRIP1/GMFB/TAOK3/DUS2/TRIB1/HEXIM1/GMFG           |

|                    |            |                                                                           |         |          |           |           |           |    |                                                                          |
|--------------------|------------|---------------------------------------------------------------------------|---------|----------|-----------|-----------|-----------|----|--------------------------------------------------------------------------|
| Molecular Function | GO:0016780 | phosphotransferase activity,<br>for other substituted<br>phosphate groups | 7/2321  | 19/18352 | 0.0064667 | 0.2231261 | 0.2106918 | 7  | PIGN/SGMS1/PGS1/CHPT1/SGMS2/PTDSS2/DPAGT1                                |
| Molecular Function | GO:0030676 | Rac guanyl-nucleotide<br>exchange factor activity                         | 7/2321  | 19/18352 | 0.0064667 | 0.2231261 | 0.2106918 | 7  | SPATA13/PREX1/FARP1/EP8L1/ARHGEF2/DOCK2/VAV3                             |
| Molecular Function | GO:0004703 | G protein-coupled receptor<br>kinase activity                             | 4/2321  | 7/18352  | 0.006501  | 0.2231261 | 0.2106918 | 4  | GRK6/GRK5/GRK7/GRK2                                                      |
| Molecular Function | GO:0017153 | sodium:dicarboxylate<br>symporter activity                                | 4/2321  | 7/18352  | 0.006501  | 0.2231261 | 0.2106918 | 4  | SLC1A2/SLC1A6/SLC1A3/SLC13A5                                             |
| Molecular Function | GO:0019784 | NEDD8-specific protease<br>activity                                       | 4/2321  | 7/18352  | 0.006501  | 0.2231261 | 0.2106918 | 4  | OTUB2/COP5/OTUB1/Uchl3                                                   |
| Molecular Function | GO:0018024 | histone-lysine N-<br>methyltransferase activity                           | 12/2321 | 44/18352 | 0.0070009 | 0.2231261 | 0.2106918 | 12 | ASH2L/SETD2/SMYD3/EHMT2/WDR82/KMT2D/SETD1B/SETD1A/PRDM16/MECOM/NSD3/NSD2 |
| Molecular Function | GO:0010857 | calcium-dependent protein<br>kinase activity                              | 8/2321  | 24/18352 | 0.0072943 | 0.2231261 | 0.2106918 | 8  | PRKCZ/PRKCA/PRKCH/PRKCB/MKNK1/PRKCI/PRKCE/MAPKAPK3                       |
| Molecular Function | GO:0005124 | scavenger receptor binding                                                | 3/2321  | 4/18352  | 0.0073167 | 0.2231261 | 0.2106918 | 3  | FPR2/FPR1/PDZK1                                                          |
| Molecular Function | GO:0005314 | high-affinity glutamate<br>transmembrane transporter<br>activity          | 3/2321  | 4/18352  | 0.0073167 | 0.2231261 | 0.2106918 | 3  | SLC1A2/SLC1A6/SLC1A3                                                     |



|                    |            |                                          |         |          |           |           |           |    |                                                                                                         |
|--------------------|------------|------------------------------------------|---------|----------|-----------|-----------|-----------|----|---------------------------------------------------------------------------------------------------------|
| Molecular Function | GO:0015501 | glutamate:sodium symporter activity      | 3/2321  | 4/18352  | 0.0073167 | 0.2231261 | 0.2106918 | 3  | SLC1A2/SLC1A6/SLC1A3                                                                                    |
| Molecular Function | GO:0047696 | beta-adrenergic receptor kinase activity | 3/2321  | 4/18352  | 0.0073167 | 0.2231261 | 0.2106918 | 3  | GRK6/GRK5/GRK2                                                                                          |
| Molecular Function | GO:0050218 | propionate-CoA ligase activity           | 3/2321  | 4/18352  | 0.0073167 | 0.2231261 | 0.2106918 | 3  | ACSS1/ACSS2/ACSS3                                                                                       |
| Molecular Function | GO:0031210 | phosphatidylcholine binding              | 9/2321  | 29/18352 | 0.007615  | 0.2231261 | 0.2106918 | 9  | PCYT1A/PLTP/PITPNM2/PITPNM1/PITPNA/NF1/PCTP/ABCA1/ESYT1                                                 |
| Molecular Function | GO:0043425 | bHLH transcription factor binding        | 9/2321  | 29/18352 | 0.007615  | 0.2231261 | 0.2106918 | 9  | SMAD3/TCF12/RUNX2/CREBBP/ARNTL/TCF3/IKZF4/FHL2/USF2                                                     |
| Molecular Function | GO:0050997 | quaternary ammonium group binding        | 9/2321  | 29/18352 | 0.007615  | 0.2231261 | 0.2106918 | 9  | PCYT1A/PLTP/PITPNM2/PITPNM1/PITPNA/NF1/PCTP/ABCA1/ESYT1                                                 |
| Molecular Function | GO:0005522 | profilin binding                         | 5/2321  | 11/18352 | 0.0076905 | 0.2231261 | 0.2106918 | 5  | WIPF1/CTTN/FMNL1/HTT/ACTG1                                                                              |
| Molecular Function | GO:0043422 | protein kinase B binding                 | 5/2321  | 11/18352 | 0.0076905 | 0.2231261 | 0.2106918 | 5  | RARA/BCL10/ARRB2/ANKRD2/PDE3B                                                                           |
| Molecular Function | GO:0051219 | phosphoprotein binding                   | 19/2321 | 85/18352 | 0.0088756 | 0.2495688 | 0.235661  | 19 | DPYS/LCK/URI1/SH3BP2/PIK3R1/ARRB1/FGR/UBASH3B/NCK2/SHB/PTPN6/SHF/PFN1/VAV2/RB1/PIH1D1/SCAF8/BCAR3/NEDD4 |

|                    |            |                                                                                         |         |           |           |           |           |    |                                                                                                                                                                                                                                                                                                                           |
|--------------------|------------|-----------------------------------------------------------------------------------------|---------|-----------|-----------|-----------|-----------|----|---------------------------------------------------------------------------------------------------------------------------------------------------------------------------------------------------------------------------------------------------------------------------------------------------------------------------|
| Molecular Function | GO:0031683 | G-protein beta/gamma-subunit complex binding                                            | 7/2321  | 20/18352  | 0.0088793 | 0.2495688 | 0.235661  | 7  | GNAZ/PIK3R5/GNAI2/GNAT2/GNA11/GNAO1/GNA12                                                                                                                                                                                                                                                                                 |
| Molecular Function | GO:0008276 | protein methyltransferase activity                                                      | 20/2321 | 91/18352  | 0.0089459 | 0.2495688 | 0.235661  | 20 | METTL21A/PRMT2/ASH2L/SETD2/SMYD3/EHMT2/WDR82/KMT2D/SETD1B/SETD1A/METTL22/PRDM16/NTMT1/FBL/MECOM/EEF1AKMT3/EEF1AKMT2/NSD3/NSD2/CSKMT                                                                                                                                                                                       |
| Molecular Function | GO:0043548 | phosphatidylinositol 3-kinase binding                                                   | 9/2321  | 30/18352  | 0.0096818 | 0.2666774 | 0.2518161 | 9  | LCK/PIK3AP1/PIK3R1/DNM2/IGF1R/FAM83A/INSRR/PDGFRB/TYRO3                                                                                                                                                                                                                                                                   |
| Molecular Function | GO:0016706 | 2-oxoglutarate-dependent dioxygenase activity                                           | 12/2321 | 46/18352  | 0.0101729 | 0.2767027 | 0.2612828 | 12 | P4HB/KDM4B/KDM2A/HSPBAP1/KDM4C/FTO/TET2/KDM7A/P4HA2/ASPH/P3H3/P3H1                                                                                                                                                                                                                                                        |
| Molecular Function | GO:0004697 | protein kinase C activity                                                               | 6/2321  | 16/18352  | 0.0105228 | 0.2792392 | 0.2636779 | 6  | PRKCZ/PRKCA/PRKCH/PRKCB/PRKCI/PRKCE                                                                                                                                                                                                                                                                                       |
| Molecular Function | GO:0004698 | calcium-dependent protein kinase C activity                                             | 6/2321  | 16/18352  | 0.0105228 | 0.2792392 | 0.2636779 | 6  | PRKCZ/PRKCA/PRKCH/PRKCB/PRKCI/PRKCE                                                                                                                                                                                                                                                                                       |
| Molecular Function | GO:0008514 | organic anion transmembrane transporter activity                                        | 42/2321 | 233/18352 | 0.0109497 | 0.2804595 | 0.2648301 | 42 | SLC38A4/SLC25A25/SLC38A10/SLC51A/ABCC1/SLC16A3/SLC10A1/MFSD2A/SLC1A5/SLC2A14/ABCC2/SLC15A4/SLC44A4/SLC2A9/SLC43A2/SLC19A1/SLC26A1/SLC22A11/SLCO3A1/SLC1A2/SLC7A7/SLC7A5/SFXN1/SLC1A6/SLC37A1/SLC16A5/ABCC3/MFSD10/SLC16A1/SLC36A3/SLC1A3/SLC52A2/SLC33A1/SLC43A1/ABCC11/SLC2A1/SLC7A8/SLC13A5/SLC7A1/SLC25A1/SLC23A1/AQP9 |
| Molecular Function | GO:0019213 | deacetylase activity                                                                    | 11/2321 | 41/18352  | 0.0109527 | 0.2804595 | 0.2648301 | 11 | HDAC4/AMDHD2/HDAC7/SIN3B/MACROD1/PIGL/NDST1/HDAC1/MTA2/YDJC/SIRT3                                                                                                                                                                                                                                                         |
| Molecular Function | GO:0016811 | hydrolase activity, acting on carbon-nitrogen (but not peptide) bonds, in linear amides | 16/2321 | 69/18352  | 0.0109554 | 0.2804595 | 0.2648301 | 16 | HDAC4/AMDHD2/HDAC7/SIN3B/PIGL/HDAC1/PDF/PGLYRP1/UPB1/CAT/MTA2/PGLYRP4/NTAN1/ASPG/NIT1/SIRT3                                                                                                                                                                                                                               |

|                    |            |                                                 |         |           |           |           |           |    |                                                                                                                                                                                                                                                                                                                                                                                                 |
|--------------------|------------|-------------------------------------------------|---------|-----------|-----------|-----------|-----------|----|-------------------------------------------------------------------------------------------------------------------------------------------------------------------------------------------------------------------------------------------------------------------------------------------------------------------------------------------------------------------------------------------------|
| Molecular Function | GO:0003714 | transcription corepressor activity              | 36/2321 | 194/18352 | 0.0113301 | 0.2817016 | 0.2660031 | 36 | ELANE/HDAC4/NCOR2/HDAC7/SIN3B/URI1/ZMYND8/SUFU/HIPK2/E2F7/CBFA2T3/CDYL/ZNF366/LIMD1/HDAC1/PHB/TLE1/MTA1/SF1/CTBP1/SFMBT2/PHF12/CREG1/WWTR1/ATF7IP/CTBP2/CREBBP/MTA2/FHL2/ATN1/CRYM/ANKRD1/KCTD1/PARP10/PARP9/PRKN                                                                                                                                                                               |
| Molecular Function | GO:0042578 | phosphoric ester hydrolase activity             | 62/2321 | 369/18352 | 0.0115185 | 0.2817016 | 0.2660031 | 62 | PDE4D/SYNJ2/PDE6A/SSH1/CTDP1/PTPRE/LCK/INPP5A/INPP5D/PFKFB4/DUSP14/TDP1/PLD1/GPLD1/UBASH3B/SMPDL3B/CCL5/PHLPP1/DUSP22/PGP/ACP6/CTDSPL/ALPL/INPP4A/PTPN6/SSH3/DUSP28/PTPRN2/CDC25A/PTPRJ/LRRK1/PTPRC/PDE6H/PPP2R1A/INPP5E/PALD1/PLCB1/PPP1CB/IMPA2/PDE9A/PPP2R5D/PLCL1/SGPP1/CA3/SGPP2/DUSP3/PPP2R1B/PLD3/CDC14A/PDE3B/PLCG1/NT5DC3/LHPP/INPP5F/PPM1N/PTPRU/PLCD3/LPIN1/PFKFB3/ACP3/PLPP3/PXYLP1 |
| Molecular Function | GO:0019798 | procollagen-proline dioxygenase activity        | 4/2321  | 8/18352   | 0.0117072 | 0.2817016 | 0.2660031 | 4  | P4HB/P4HA2/P3H3/P3H1                                                                                                                                                                                                                                                                                                                                                                            |
| Molecular Function | GO:0048495 | Roundabout binding                              | 4/2321  | 8/18352   | 0.0117072 | 0.2817016 | 0.2660031 | 4  | MYO9B/TGFB11/SLIT3/SLIT1                                                                                                                                                                                                                                                                                                                                                                        |
| Molecular Function | GO:0005164 | tumor necrosis factor receptor binding          | 9/2321  | 31/18352  | 0.0121444 | 0.2817016 | 0.2660031 | 9  | TNF/TRAF2/TRAF1/TNFSF13B/TNFSF12/TNFSF13/SIVA1/FADD/BABAM2                                                                                                                                                                                                                                                                                                                                      |
| Molecular Function | GO:0001784 | phosphotyrosine residue binding                 | 11/2321 | 42/18352  | 0.0131843 | 0.2817016 | 0.2660031 | 11 | LCK/SH3BP2/PIK3R1/FGR/NCK2/SHB/PTPN6/SHF/PFN1/VAV2/BCAR3                                                                                                                                                                                                                                                                                                                                        |
| Molecular Function | GO:0015144 | carbohydrate transmembrane transporter activity | 10/2321 | 37/18352  | 0.0141888 | 0.2817016 | 0.2660031 | 10 | SLC2A5/SLC45A4/SLC2A14/SLC2A9/AQP1/AQP3/SLC5A10/SLC2A1/SLC23A1/AQP9                                                                                                                                                                                                                                                                                                                             |
| Molecular Function | GO:0003951 | NAD+ kinase activity                            | 6/2321  | 17/18352  | 0.0145518 | 0.2817016 | 0.2660031 | 6  | NADK/SPHK2/DGKQ/DGKA/DGKD/CERK                                                                                                                                                                                                                                                                                                                                                                  |
| Molecular Function | GO:0030169 | low-density lipoprotein particle binding        | 6/2321  | 17/18352  | 0.0145518 | 0.2817016 | 0.2660031 | 6  | SORL1/LIPC/PLTP/THBS1/COLEC12/STAB2                                                                                                                                                                                                                                                                                                                                                             |

|                    |            |                                               |        |          |           |           |           |   |                                                        |
|--------------------|------------|-----------------------------------------------|--------|----------|-----------|-----------|-----------|---|--------------------------------------------------------|
| Molecular Function | GO:0050780 | dopamine receptor binding                     | 6/2321 | 17/18352 | 0.0145518 | 0.2817016 | 0.2660031 | 6 | PPP1R1B/DNM2/PALM/ARRB2/DNM1/GNA12                     |
| Molecular Function | GO:0042910 | xenobiotic transmembrane transporter activity | 8/2321 | 27/18352 | 0.015594  | 0.2817016 | 0.2660031 | 8 | ABCC1/ABCC2/RALBP1/SLC19A1/SLC7A5/SLC22A5/ABCC3/SLC2A1 |
| Molecular Function | GO:0051393 | alpha-actinin binding                         | 8/2321 | 27/18352 | 0.015594  | 0.2817016 | 0.2660031 | 8 | PPARG/TTN/CACNA1C/PRICKLE4/PDLIM2/RARA/MYOT/PDLIM4     |
| Molecular Function | GO:0001632 | leukotriene B4 receptor activity              | 2/2321 | 2/18352  | 0.015989  | 0.2817016 | 0.2660031 | 2 | LTB4R2/LTB4R                                           |
| Molecular Function | GO:0003943 | N-acetylgalactosamine-4-sulfatase activity    | 2/2321 | 2/18352  | 0.015989  | 0.2817016 | 0.2660031 | 2 | GALNS/ARSB                                             |
| Molecular Function | GO:0003989 | acetyl-CoA carboxylase activity               | 2/2321 | 2/18352  | 0.015989  | 0.2817016 | 0.2660031 | 2 | ACACB/ACACA                                            |
| Molecular Function | GO:0004329 | formate-tetrahydrofolate ligase activity      | 2/2321 | 2/18352  | 0.015989  | 0.2817016 | 0.2660031 | 2 | MTHFD1L/MTHFD1                                         |
| Molecular Function | GO:0004797 | thymidine kinase activity                     | 2/2321 | 2/18352  | 0.015989  | 0.2817016 | 0.2660031 | 2 | TK2/TK1                                                |
| Molecular Function | GO:0005150 | interleukin-1, type I receptor binding        | 2/2321 | 2/18352  | 0.015989  | 0.2817016 | 0.2660031 | 2 | TOLLIP/IL1RN                                           |

|                    |            |                                                                |        |         |          |           |           |   |                 |
|--------------------|------------|----------------------------------------------------------------|--------|---------|----------|-----------|-----------|---|-----------------|
| Molecular Function | GO:0010465 | nerve growth factor receptor activity                          | 2/2321 | 2/18352 | 0.015989 | 0.2817016 | 0.2660031 | 2 | SORT1/NTRK1     |
| Molecular Function | GO:0031691 | alpha-1A adrenergic receptor binding                           | 2/2321 | 2/18352 | 0.015989 | 0.2817016 | 0.2660031 | 2 | ARRB1/ARRB2     |
| Molecular Function | GO:0031753 | endothelial differentiation G protein-coupled receptor binding | 2/2321 | 2/18352 | 0.015989 | 0.2817016 | 0.2660031 | 2 | RALA/GRK2       |
| Molecular Function | GO:0031755 | Edg-2 lysophosphatidic acid receptor binding                   | 2/2321 | 2/18352 | 0.015989 | 0.2817016 | 0.2660031 | 2 | RALA/GRK2       |
| Molecular Function | GO:0031762 | follicle-stimulating hormone receptor binding                  | 2/2321 | 2/18352 | 0.015989 | 0.2817016 | 0.2660031 | 2 | ARRB1/ARRB2     |
| Molecular Function | GO:0035403 | histone kinase activity (H3-T6 specific)                       | 2/2321 | 2/18352 | 0.015989 | 0.2817016 | 0.2660031 | 2 | PRKCA/PRKCB     |
| Molecular Function | GO:0042008 | interleukin-18 receptor activity                               | 2/2321 | 2/18352 | 0.015989 | 0.2817016 | 0.2660031 | 2 | IL18RAP/IL18R1  |
| Molecular Function | GO:0045174 | glutathione dehydrogenase (ascorbate) activity                 | 2/2321 | 2/18352 | 0.015989 | 0.2817016 | 0.2660031 | 2 | GSTO1/GSTO2     |
| Molecular Function | GO:0047288 | monosialoganglioside sialyltransferase activity                | 2/2321 | 2/18352 | 0.015989 | 0.2817016 | 0.2660031 | 2 | ST3GAL4/ST3GAL2 |

|                    |            |                                                               |         |           |           |           |           |    |                                                                                                                                                                                                            |                                                                                                |
|--------------------|------------|---------------------------------------------------------------|---------|-----------|-----------|-----------|-----------|----|------------------------------------------------------------------------------------------------------------------------------------------------------------------------------------------------------------|------------------------------------------------------------------------------------------------|
| Molecular Function | GO:0050610 | methylarsenate reductase activity                             | 2/2321  | 2/18352   | 0.015989  | 0.2817016 | 0.2660031 | 2  |                                                                                                                                                                                                            | GSTO1/GSTO2                                                                                    |
| Molecular Function | GO:0050659 | N-acetylgalactosamine 4-sulfate 6-O-sulfotransferase activity | 2/2321  | 2/18352   | 0.015989  | 0.2817016 | 0.2660031 | 2  |                                                                                                                                                                                                            | CHST11/CHST15                                                                                  |
| Molecular Function | GO:0061507 | cyclic-GMP-AMP binding                                        | 2/2321  | 2/18352   | 0.015989  | 0.2817016 | 0.2660031 | 2  |                                                                                                                                                                                                            | SLC19A1/STING1                                                                                 |
| Molecular Function | GO:0072570 | ADP-D-ribose binding                                          | 2/2321  | 2/18352   | 0.015989  | 0.2817016 | 0.2660031 | 2  |                                                                                                                                                                                                            | TRPM2/PARP9                                                                                    |
| Molecular Function | GO:1901981 | phosphatidylinositol phosphate binding                        | 33/2321 | 179/18352 | 0.0162499 | 0.2817016 | 0.2660031 | 33 | VILL/OSBPL5/GSN/ANKFY1/DENND1A/ADAP1/NCF4/ACAP2/GAB2/SNX27/CAPG/SH3PXD2B/WIPI2/ARAP1/SNX3/ASAP1/SNX11/RUFY4/SVIL/PFN1/PLEKHA2/PLCB1/SNX18/KCNQ1/ZFYVE19/DAPP1/RPH3A/AVIL/FLII/SDCBP2/PHLDA1/GRAMD2A/RUBCNL |                                                                                                |
| Molecular Function | GO:0001098 | basal transcription machinery binding                         | 16/2321 | 72/18352  | 0.0163828 | 0.2817016 | 0.2660031 | 16 |                                                                                                                                                                                                            | BRD4/CTDP1/MIR140/MIR145/WDR43/URI1/AGO1/RECQL5/SMYD3/AGO2/ESRRB/SCAF8/ERCC1/RPRD1B/RUVBL1/FBL |
| Molecular Function | GO:0001099 | basal RNA polymerase II transcription machinery binding       | 16/2321 | 72/18352  | 0.0163828 | 0.2817016 | 0.2660031 | 16 |                                                                                                                                                                                                            | BRD4/CTDP1/MIR140/MIR145/WDR43/URI1/AGO1/RECQL5/SMYD3/AGO2/ESRRB/SCAF8/ERCC1/RPRD1B/RUVBL1/FBL |
| Molecular Function | GO:0004630 | phospholipase D activity                                      | 3/2321  | 5/18352   | 0.0165707 | 0.2817016 | 0.2660031 | 3  |                                                                                                                                                                                                            | PLD1/GPLD1/PLD3                                                                                |
| Molecular Function | GO:0008310 | single-stranded DNA 3'-5' exodeoxyribonuclease activity       | 3/2321  | 5/18352   | 0.0165707 | 0.2817016 | 0.2660031 | 3  |                                                                                                                                                                                                            | POLE/MEIOB/ISG20                                                                               |

|                    |            |                                                         |        |          |           |           |           |   |                                   |
|--------------------|------------|---------------------------------------------------------|--------|----------|-----------|-----------|-----------|---|-----------------------------------|
| Molecular Function | GO:0015038 | glutathione disulfide oxidoreductase activity           | 3/2321 | 5/18352  | 0.0165707 | 0.2817016 | 0.2660031 | 3 | GSTO1/GLRX2/GSTO2                 |
| Molecular Function | GO:0031698 | beta-2 adrenergic receptor binding                      | 3/2321 | 5/18352  | 0.0165707 | 0.2817016 | 0.2660031 | 3 | PDE4D/AKAP5/NEDD4                 |
| Molecular Function | GO:0031749 | D2 dopamine receptor binding                            | 3/2321 | 5/18352  | 0.0165707 | 0.2817016 | 0.2660031 | 3 | PPP1R1B/DNM2/DNM1                 |
| Molecular Function | GO:0034040 | ATPase-coupled lipid transmembrane transporter activity | 3/2321 | 5/18352  | 0.0165707 | 0.2817016 | 0.2660031 | 3 | ABCC1/ABCG1/ABCC3                 |
| Molecular Function | GO:0043120 | tumor necrosis factor binding                           | 3/2321 | 5/18352  | 0.0165707 | 0.2817016 | 0.2660031 | 3 | TNFRSF1B/TRAF2/TNFRSF1A           |
| Molecular Function | GO:0048406 | nerve growth factor binding                             | 3/2321 | 5/18352  | 0.0165707 | 0.2817016 | 0.2660031 | 3 | PCSK6/SORT1/NTRK1                 |
| Molecular Function | GO:0070051 | fibrinogen binding                                      | 3/2321 | 5/18352  | 0.0165707 | 0.2817016 | 0.2660031 | 3 | THBS1/ITGA2B/ITGB3                |
| Molecular Function | GO:0015037 | peptide disulfide oxidoreductase activity               | 5/2321 | 13/18352 | 0.017246  | 0.2886714 | 0.2725844 | 5 | P4HB/PDIA5/GSTO1/GLRX2/GSTO2      |
| Molecular Function | GO:0052745 | inositol phosphate phosphatase activity                 | 5/2321 | 13/18352 | 0.017246  | 0.2886714 | 0.2725844 | 5 | INPP5A/INPP5D/INPP5E/IMPA2/INPP5F |

|                    |            |                                                         |         |          |           |           |           |    |                                                                                                              |
|--------------------|------------|---------------------------------------------------------|---------|----------|-----------|-----------|-----------|----|--------------------------------------------------------------------------------------------------------------|
| Molecular Function | GO:0008013 | beta-catenin binding                                    | 18/2321 | 85/18352 | 0.0184007 | 0.2950811 | 0.2786369 | 18 | KANK1/ASH2L/SMAD3/SUFU/TCF7L2/SMAD7/SLC9A3R2/PXN/PTPRJ/AXIN1/NUMB/SETD1A/CDH1/MED12L/FOXO1/CHD8/PTPRU/PRKN   |
| Molecular Function | GO:0017112 | Rab guanyl-nucleotide exchange factor activity          | 9/2321  | 33/18352 | 0.0184239 | 0.2950811 | 0.2786369 | 9  | SH3BP5L/RIN2/DENND1A/SH3BP5/RIN3/DENND3/RABGEF1/DENND6B/DENND2B                                              |
| Molecular Function | GO:0031624 | ubiquitin conjugating enzyme binding                    | 9/2321  | 33/18352 | 0.0184239 | 0.2950811 | 0.2786369 | 9  | RNF144A/RNF19A/TOLLIP/RNF144B/RNF14/RNF40/MARCHF6/PRKN/MARCHF7                                               |
| Molecular Function | GO:0046332 | SMAD binding                                            | 17/2321 | 79/18352 | 0.0185531 | 0.2950811 | 0.2786369 | 17 | SKI/TGFBRAP1/SMAD3/LDLRAD4/ZEB2/HIPK2/TGFB2/TCF12/SMAD7/ZMIZ1/SMURF1/AXIN1/TGFB111/BMP1B/PRDM16/ZC3H3/ANKRD1 |
| Molecular Function | GO:0070063 | RNA polymerase binding                                  | 17/2321 | 79/18352 | 0.0185531 | 0.2950811 | 0.2786369 | 17 | BRD4/MIR140/MIR145/WDR43/URI1/AGO1/RECQL5/BIN1/SMYD3/TAF10/AGO2/PABPN1/GSG1/ESRRB/SCAF8/NEDD4/RPRD1B         |
| Molecular Function | GO:0008297 | single-stranded DNA exodeoxyribonuclease activity       | 4/2321  | 9/18352  | 0.018985  | 0.2950811 | 0.2786369 | 4  | POLE/MEIOB/PLD3/ISG20                                                                                        |
| Molecular Function | GO:0017162 | aryl hydrocarbon receptor binding                       | 4/2321  | 9/18352  | 0.018985  | 0.2950811 | 0.2786369 | 4  | AIP/NCOA1/ARNTL/NCOA2                                                                                        |
| Molecular Function | GO:0031821 | G protein-coupled serotonin receptor binding            | 4/2321  | 9/18352  | 0.018985  | 0.2950811 | 0.2786369 | 4  | GNAZ/GNA11/ARRB2/GNAO1                                                                                       |
| Molecular Function | GO:0034713 | type I transforming growth factor beta receptor binding | 4/2321  | 9/18352  | 0.018985  | 0.2950811 | 0.2786369 | 4  | TGFB2/SMAD7/TGFB1/ENG                                                                                        |



|                    |            |                                                  |         |           |           |           |           |    |                                                                                                                                                                                                                                                                                                         |
|--------------------|------------|--------------------------------------------------|---------|-----------|-----------|-----------|-----------|----|---------------------------------------------------------------------------------------------------------------------------------------------------------------------------------------------------------------------------------------------------------------------------------------------------------|
| Molecular Function | GO:1990763 | arrestin family protein binding                  | 4/2321  | 9/18352   | 0.018985  | 0.2950811 | 0.2786369 | 4  | CREB1/ARRB1/CHRM2/ARRB2                                                                                                                                                                                                                                                                                 |
| Molecular Function | GO:0050681 | androgen receptor binding                        | 8/2321  | 28/18352  | 0.0194707 | 0.3004845 | 0.2837393 | 8  | FOXP1/CALR/PRMT2/PRKCB/TGFB11/KDM4C/RNF14/PRPF6                                                                                                                                                                                                                                                         |
| Molecular Function | GO:0016791 | phosphatase activity                             | 47/2321 | 277/18352 | 0.021423  | 0.3261192 | 0.3079454 | 47 | SYNJ2/SSH1/CTDP1/PTPRE/LCK/INPP5A/INPP5D/PFKFB4/DUSP14/UBASH3B/PHLPP1/DUSP22/PGP/ACP6/CTDSPL/ALPL/INPP4A/PTPN6/SSH3/DUSP28/PTPRN2/CDC25A/PTPRJ/LRRK1/PTPRC/PPP2R1A/INPP5E/PALD1/PPP1CB/IMPA2/PPP2R5D/SGPP1/CA3/SGPP2/DUSP3/PPP2R1B/CDC14A/NT5DC3/LHPP/INPP5F/PPM1N/PTPRU/LPIN1/PFKFB3/ACP3/PLPP3/PXYLP1 |
| Molecular Function | GO:0019207 | kinase regulator activity                        | 38/2321 | 216/18352 | 0.0214315 | 0.3261192 | 0.3079454 | 38 | RPTOR/SPRED2/PRKAG2/SH3BP5L/ITPRIP/RHOH/PPP1R1B/PRKAR1B/PIK3R1/PIK3R6/CCL5/SH3BP5/ITSN1/TESC/PIK3R5/PRKRIP1/WNT1/DGKQ/GMFB/GHRL/CAB39/STK3/BCL10/CCNH/TAOK3/CCNA1/DUS2/LTF/WDR81/TRIB1/MARK2/HEXIM1/CCNY/GMFG/CCNYL1/DAZAP2/CCNP/SLA2                                                                   |
| Molecular Function | GO:0090482 | vitamin transmembrane transporter activity       | 8/2321  | 29/18352  | 0.0239872 | 0.3589826 | 0.3389774 | 8  | ABCC1/SLC2A14/SLC44A4/SLC19A1/CD320/SLC52A2/SLC2A1/SLC23A1                                                                                                                                                                                                                                              |
| Molecular Function | GO:0050998 | nitric-oxide synthase binding                    | 5/2321  | 14/18352  | 0.0240861 | 0.3589826 | 0.3389774 | 5  | DNM2/NOS1AP/SNTA1/DNM1/DNM3                                                                                                                                                                                                                                                                             |
| Molecular Function | GO:0070411 | I-SMAD binding                                   | 5/2321  | 14/18352  | 0.0240861 | 0.3589826 | 0.3389774 | 5  | SMAD3/SMAD7/SMURF1/AXIN1/TGFB11                                                                                                                                                                                                                                                                         |
| Molecular Function | GO:0008170 | N-methyltransferase activity                     | 20/2321 | 100/18352 | 0.0243261 | 0.3600931 | 0.340026  | 20 | METTL21A/PRMT2/ASH2L/SETD2/SMYD3/EHMT2/WDR82/KMT2D/SETD1B/SETD1A/METTL22/PRDM16/FBL/HNMT/MECOM/EEF1AKMT3/EEF1AKMT2/NSD3/NSD2/CSKMT                                                                                                                                                                      |
| Molecular Function | GO:0005160 | transforming growth factor beta receptor binding | 7/2321  | 24/18352  | 0.0252324 | 0.3709696 | 0.3502963 | 7  | LRG1/TGFBRAP1/SMAD3/TGFB2/SMAD7/TGFB1/ENG                                                                                                                                                                                                                                                               |

|                    |            |                                                          |         |           |           |           |           |    |                                                                                                                                                                                                                        |
|--------------------|------------|----------------------------------------------------------|---------|-----------|-----------|-----------|-----------|----|------------------------------------------------------------------------------------------------------------------------------------------------------------------------------------------------------------------------|
| Molecular Function | GO:0000339 | RNA cap binding                                          | 6/2321  | 19/18352  | 0.0255724 | 0.3709696 | 0.3502963 | 6  | LSM1/LARP1/AGO2/SNUPN/CYFIP1/NCBP3                                                                                                                                                                                     |
| Molecular Function | GO:0070300 | phosphatidic acid binding                                | 6/2321  | 19/18352  | 0.0255724 | 0.3709696 | 0.3502963 | 6  | PACSIN2/PLTP/PITPNM1/RAPGEF2/MICALL1/PITPNC1                                                                                                                                                                           |
| Molecular Function | GO:0008235 | metalloexopeptidase activity                             | 14/2321 | 64/18352  | 0.0270079 | 0.3892002 | 0.3675111 | 14 | LNPEP/CPD/CNDP2/CPQ/AGBL5/DPP3/XPNPEP1/VASH1/AEBP1/RNPEPL1/CPB2/DPEP2/AGBL2/AOPEP                                                                                                                                      |
| Molecular Function | GO:0005516 | calmodulin binding                                       | 35/2321 | 200/18352 | 0.0283262 | 0.3903487 | 0.3685955 | 35 | SNTB2/PCYT1A/TTN/UBR4/MYH11/CACNA1C/MYO9B/ITPKB/MYLK/SLC8A1/KCNN1/KCNQ2/ATP2B2/CAMKK2/MYH15/MYH9/MBP/CAMKK1/AKAP5/STRN4/MYO5A/CAMK1D/IQCG/MKMK1/PLCB1/SNTA1/KCNQ1/SNTB1/ADD1/AEBP1/DAPK2/MYO1C/MAPKAPK3/SPTAN1/CFAP221 |
| Molecular Function | GO:0008190 | eukaryotic initiation factor 4E binding                  | 4/2321  | 10/18352  | 0.0285227 | 0.3903487 | 0.3685955 | 4  | LARP1/HHEX/OTX2/EIF4G1                                                                                                                                                                                                 |
| Molecular Function | GO:0016176 | superoxide-generating NADPH oxidase activator activity   | 4/2321  | 10/18352  | 0.0285227 | 0.3903487 | 0.3685955 | 4  | NCF4/SH3PXD2B/NCF2/PDGFB                                                                                                                                                                                               |
| Molecular Function | GO:0036312 | phosphatidylinositol 3-kinase regulatory subunit binding | 4/2321  | 10/18352  | 0.0285227 | 0.3903487 | 0.3685955 | 4  | PIK3AP1/PIK3R1/DNM2/FAM83A                                                                                                                                                                                             |
| Molecular Function | GO:0043560 | insulin receptor substrate binding                       | 4/2321  | 10/18352  | 0.0285227 | 0.3903487 | 0.3685955 | 4  | PRKCZ/PIK3R1/IGF1R/INSRR                                                                                                                                                                                               |
| Molecular Function | GO:0051864 | histone demethylase activity (H3-K36 specific)           | 4/2321  | 10/18352  | 0.0285227 | 0.3903487 | 0.3685955 | 4  | KDM4B/KDM2A/KDM4C/KDM7A                                                                                                                                                                                                |

|                    |            |                                                                       |         |           |           |           |           |    |                                                                                                                                                                                                                                                                                           |
|--------------------|------------|-----------------------------------------------------------------------|---------|-----------|-----------|-----------|-----------|----|-------------------------------------------------------------------------------------------------------------------------------------------------------------------------------------------------------------------------------------------------------------------------------------------|
| Molecular Function | GO:0070016 | armadillo repeat domain binding                                       | 4/2321  | 10/18352  | 0.0285227 | 0.3903487 | 0.3685955 | 4  | TCF7L2/AXIN1/STRN4/CHD8                                                                                                                                                                                                                                                                   |
| Molecular Function | GO:0140036 | ubiquitin-dependent protein binding                                   | 4/2321  | 10/18352  | 0.0285227 | 0.3903487 | 0.3685955 | 4  | ANKRD13B/ANKRD13D/ANKRD13A/TP53BP1                                                                                                                                                                                                                                                        |
| Molecular Function | GO:0016810 | hydrolase activity, acting on carbon-nitrogen (but not peptide) bonds | 23/2321 | 121/18352 | 0.0289746 | 0.3940545 | 0.3720949 | 23 | HDAC4/CDA/DPYS/AMPD3/AMDHD2/HDAC7/SIN3B/PIGL/PADI2/HDAC1/CD101/PDF/PGLYRP1/UPB1/CAT/MTA2/MTHFD1/PGLYRP4/NTAN1/DCTD/ASPG/NIT1/SIRT3                                                                                                                                                        |
| Molecular Function | GO:0001225 | RNA polymerase II transcription coactivator binding                   | 3/2321  | 6/18352   | 0.0300454 | 0.3962348 | 0.3741536 | 3  | CREB1/NFATC1/RELA                                                                                                                                                                                                                                                                         |
| Molecular Function | GO:0004445 | inositol-polyphosphate 5-phosphatase activity                         | 3/2321  | 6/18352   | 0.0300454 | 0.3962348 | 0.3741536 | 3  | INPP5A/INPP5D/INPP5E                                                                                                                                                                                                                                                                      |
| Molecular Function | GO:0004711 | ribosomal protein S6 kinase activity                                  | 3/2321  | 6/18352   | 0.0300454 | 0.3962348 | 0.3741536 | 3  | RPS6KA1/RPS6KA2/RPS6KA4                                                                                                                                                                                                                                                                   |
| Molecular Function | GO:0008559 | ATPase-coupled xenobiotic transmembrane transporter activity          | 3/2321  | 6/18352   | 0.0300454 | 0.3962348 | 0.3741536 | 3  | ABCC1/ABCC2/ABCC3                                                                                                                                                                                                                                                                         |
| Molecular Function | GO:0043559 | insulin binding                                                       | 3/2321  | 6/18352   | 0.0300454 | 0.3962348 | 0.3741536 | 3  | PIK3R1/IGF1R/C2CD2L                                                                                                                                                                                                                                                                       |
| Molecular Function | GO:0031625 | ubiquitin protein ligase binding                                      | 49/2321 | 297/18352 | 0.0303758 | 0.3962801 | 0.3741964 | 49 | CALR/PRR5L/TOLLIP/ARRDC5/SKI/TNFRSF1B/SMAD3/ARRB1/TRAF2/UBASH3B/CBS/TRAF1/FBXO7/RTN4/CUL3/HM13/RIPK1/NDUFS2/CLU/SMAD7/UBE2J2/PXN/JAK1/ZNF746/AXIN1/ACTG1/BCL10/ARRB2/NEK6/RALA/YWHAZ/OTUB1/RB1/BCL2/PER1/DNM1L/CHEK2/FOXO1/USP2/TRIB1/RELA/RNF40/BAG5/NAE1/SPART/STING1/PRKN/ATP6VOC/SLF1 |

|                    |            |                                                    |         |           |           |           |           |    |                                                                                                                                                                                                                       |
|--------------------|------------|----------------------------------------------------|---------|-----------|-----------|-----------|-----------|----|-----------------------------------------------------------------------------------------------------------------------------------------------------------------------------------------------------------------------|
| Molecular Function | GO:0000993 | RNA polymerase II complex binding                  | 12/2321 | 53/18352  | 0.030413  | 0.3962801 | 0.3741964 | 12 | BRD4/MIR140/MIR145/WDR43/URI1/AGO1/RECQL5/SMYD3/AGO2/ESRRB/SCAF8/RPRD1B                                                                                                                                               |
| Molecular Function | GO:0015179 | L-amino acid transmembrane transporter activity    | 13/2321 | 59/18352  | 0.0306331 | 0.3967712 | 0.3746601 | 13 | SLC1A5/SLC15A4/SLC43A2/SLC1A2/SLC7A7/SLC7A5/SFXN1/SLC1A6/SLC36A3/SLC1A3/SLC43A1/SLC7A8/SLC7A1                                                                                                                         |
| Molecular Function | GO:0042805 | actinin binding                                    | 9/2321  | 36/18352  | 0.0318191 | 0.4096939 | 0.3868626 | 9  | PPARG/TTN/CACNA1C/PRICKLE4/PDLIM2/RARA/MYOT/PDLIM4/RELA                                                                                                                                                               |
| Molecular Function | GO:0046943 | carboxylic acid transmembrane transporter activity | 29/2321 | 162/18352 | 0.0329568 | 0.4218475 | 0.398339  | 29 | SLC38A4/SLC38A10/SLC51A/SLC16A3/SLC10A1/MFSD2A/SLC1A5/ABCC2/SLC15A4/SLC43A2/SLC19A1/SLC26A1/SLC1A2/SLC7A7/SLC7A5/SFXN1/SLC1A6/SLC16A5/ABCC3/SLC16A1/SLC36A3/SLC1A3/SLC43A1/SLC7A8/SLC13A5/SLC7A1/SLC25A1/SLC23A1/AQP9 |
| Molecular Function | GO:0008022 | protein C-terminus binding                         | 33/2321 | 189/18352 | 0.0334045 | 0.4250773 | 0.4013888 | 33 | KSR1/AP2A1/PPARG/FOXN3/LCK/BRCA2/ATXN1/ZBTB16/BAIAP2/CEP135/NCF2/SLC9A3R2/AGO2/PHB/MIF4GD/CTBP1/CSK/BCL10/SH3GL1/NUMA1/PEX26/DNM1/MYO1C/ERCC1/CAN1B/SDCBP2/YWHAQ/EZR/BANF1/ERCC2/DAPK3/DBNL/PRKAA1                    |
| Molecular Function | GO:0032813 | tumor necrosis factor receptor superfamily binding | 11/2321 | 48/18352  | 0.0343791 | 0.4349357 | 0.4106978 | 11 | TNF/TRAF2/TRAF1/TNFSF13B/RIPK1/TNFSF12/TNFSF13/SIVA1/NTF4/FADD/BABAM2                                                                                                                                                 |
| Molecular Function | GO:0005342 | organic acid transmembrane transporter activity    | 29/2321 | 163/18352 | 0.035412  | 0.4454132 | 0.4205914 | 29 | SLC38A4/SLC38A10/SLC51A/SLC16A3/SLC10A1/MFSD2A/SLC1A5/ABCC2/SLC15A4/SLC43A2/SLC19A1/SLC26A1/SLC1A2/SLC7A7/SLC7A5/SFXN1/SLC1A6/SLC16A5/ABCC3/SLC16A1/SLC36A3/SLC1A3/SLC43A1/SLC7A8/SLC13A5/SLC7A1/SLC25A1/SLC23A1/AQP9 |
| Molecular Function | GO:0002020 | protease binding                                   | 25/2321 | 137/18352 | 0.0369025 | 0.4529959 | 0.4277516 | 25 | ELANE/NLRC4/CSTA/TIMP2/SERPINA1/LCN2/TTN/BRCA2/CD177/IL1R1/AMFR/RHBDD2/TNF/TNFAIP3/BIN1/MBP/DERL2/ITGB3/BCL10/NOL3/BCL2/FLOT1/FADD/MARCHF6/PRKN                                                                       |
| Molecular Function | GO:0004180 | carboxypeptidase activity                          | 10/2321 | 43/18352  | 0.0388328 | 0.4529959 | 0.4277516 | 10 | CTSZ/CPD/CNDP2/CPQ/AGBL5/VASH1/AEBP1/CPB2/AGBL2/MINDY1                                                                                                                                                                |

|                    |            |                                                                        |         |           |           |           |           |    |                                                                                                                                                                                                                                                                                                                                                                                                                          |
|--------------------|------------|------------------------------------------------------------------------|---------|-----------|-----------|-----------|-----------|----|--------------------------------------------------------------------------------------------------------------------------------------------------------------------------------------------------------------------------------------------------------------------------------------------------------------------------------------------------------------------------------------------------------------------------|
| Molecular Function | GO:0022804 | active transmembrane transporter activity                              | 55/2321 | 344/18352 | 0.0390704 | 0.4529959 | 0.4277516 | 55 | SLC38A4/CLCN6/ABCC1/SLC16A3/SLC10A1/MFSD2A/SLC45A4/SLC35C2/FXYD2/SLC11A1/SLC24A4/SLC1A5/SLC8A1/ABCG1/ATP8A1/ABCC2/ATP2B2/SLC11A2/SLC15A4/SLC2A9/ATP6V1B2/RALBP1/SLC13A4/SLC19A1/SLC26A1/SLC22A11/SLCO3A1/SLC1A2/SLC7A5/CD320/ABCA1/ATP2A3/SLC1A6/SLC22A5/SLC37A1/SLC16A5/ABCC3/SLC16A1/SLC36A3/SLC1A3/SLC33A1/ATP6V0B/SLC5A10/ABCB8/ABCC11/SLC7A8/SLC13A5/ATP7B/SLC12A1/SLC12A7/SLC25A1/SLC23A1/SLC41A1/ATP6V0C/ATP6V1C1 |
| Molecular Function | GO:0044389 | ubiquitin-like protein ligase binding                                  | 51/2321 | 316/18352 | 0.0393394 | 0.4529959 | 0.4277516 | 51 | CALR/PRR5L/TOLLIP/ARRDC5/SKI/TNFRSF1B/SMAD3/ARRB1/TRAF2/UBASH3B/CBS/TRAF1/FBXO7/RTN4/CUL3/HM13/RIPK1/NDUFS2/CLU/SMAD7/UBE2J2/PXN/JAK1/ZNF746/AXIN1/ACTG1/BCL10/ARRB2/NEK6/RALA/YWHAZ/OTUB1/RB1/BCL2/PER1/DNM1L/CHEK2/CEBPB/FOXO1/USP2/TRIB1/RELA/RNF40/BAG5/PARP9/NAE1/SPART/STING1/PRKN/ATP6V0C/SLF1                                                                                                                    |
| Molecular Function | GO:0043522 | leucine zipper domain binding                                          | 4/2321  | 11/18352  | 0.0404269 | 0.4529959 | 0.4277516 | 4  | ERC1/NRL/DAPK3/MRTFA                                                                                                                                                                                                                                                                                                                                                                                                     |
| Molecular Function | GO:0140326 | ATPase-coupled intramembrane lipid transporter activity                | 4/2321  | 11/18352  | 0.0404269 | 0.4529959 | 0.4277516 | 4  | TMEM30A/ABCG1/ATP8B1/ABCA1                                                                                                                                                                                                                                                                                                                                                                                               |
| Molecular Function | GO:0043495 | protein-membrane adaptor activity                                      | 6/2321  | 21/18352  | 0.0410608 | 0.4529959 | 0.4277516 | 6  | JUP/MYH9/SLC9A3R2/EPB41L3/PDZK1/SPTBN4                                                                                                                                                                                                                                                                                                                                                                                   |
| Molecular Function | GO:0140303 | intramembrane lipid transporter activity                               | 6/2321  | 21/18352  | 0.0410608 | 0.4529959 | 0.4277516 | 6  | TMEM30A/ABCG1/ANO7/ATP8B1/ABCA1/ANO6                                                                                                                                                                                                                                                                                                                                                                                     |
| Molecular Function | GO:0044325 | ion channel binding                                                    | 24/2321 | 132/18352 | 0.0417696 | 0.4529959 | 0.4277516 | 24 | PDE4D/KCNE1/KCNAB2/ITPR2/YWHAH/FXYD1/SLC8A1/ARRB1/PACS2/ACTN1/ACTN4/HTT/SH3GL1/ATP2A3/SNTA1/KCNQ1/YWHAZ/ANK2/CHERP/YWHAQ/GRINA/CABP4/CBARP/TRAPPC2                                                                                                                                                                                                                                                                       |
| Molecular Function | GO:1902936 | phosphatidylinositol bisphosphate binding                              | 22/2321 | 119/18352 | 0.0423222 | 0.4529959 | 0.4277516 | 22 | VILL/GSN/ADAP1/ACAP2/GAB2/CAPG/SH3PXD2B/WIPI2/SNX3/ASAP1/SVIL/PFN1/PLEKHA2/PLCB1/SNX18/KCNQ1/DAPP1/RPH3A/AVIL/FLII/SDCBP2/GRAMD2A                                                                                                                                                                                                                                                                                        |
| Molecular Function | GO:0001161 | intronic transcription regulatory region sequence-specific DNA binding | 5/2321  | 16/18352  | 0.0424212 | 0.4529959 | 0.4277516 | 5  | RXRA/SMYD3/ZC3H8/GRHL2/NCOA2                                                                                                                                                                                                                                                                                                                                                                                             |

|                    |            |                                                                                |        |          |           |           |           |   |                                                      |
|--------------------|------------|--------------------------------------------------------------------------------|--------|----------|-----------|-----------|-----------|---|------------------------------------------------------|
| Molecular Function | GO:0043531 | ADP binding                                                                    | 9/2321 | 38/18352 | 0.0438033 | 0.4529959 | 0.4277516 | 9 | PRKAG2/MYO9B/ERN1/MYO18A/ABCG1/MYH9/PKM/MIEF1/RUVBL1 |
| Molecular Function | GO:0002950 | ceramide<br>phosphoethanolamine<br>synthase activity                           | 2/2321 | 3/18352  | 0.0439256 | 0.4529959 | 0.4277516 | 2 | SGMS1/SGMS2                                          |
| Molecular Function | GO:0004591 | oxoglutarate dehydrogenase<br>(succinyl-transferring)<br>activity              | 2/2321 | 3/18352  | 0.0439256 | 0.4529959 | 0.4277516 | 2 | DHTKD1/OGDH                                          |
| Molecular Function | GO:0004965 | G protein-coupled GABA<br>receptor activity                                    | 2/2321 | 3/18352  | 0.0439256 | 0.4529959 | 0.4277516 | 2 | GABBR1/GABBR2                                        |
| Molecular Function | GO:0005009 | insulin-activated receptor<br>activity                                         | 2/2321 | 3/18352  | 0.0439256 | 0.4529959 | 0.4277516 | 2 | IGF1R/INSRR                                          |
| Molecular Function | GO:0005010 | insulin-like growth factor-<br>activated receptor activity                     | 2/2321 | 3/18352  | 0.0439256 | 0.4529959 | 0.4277516 | 2 | IGF1R/CRIM1                                          |
| Molecular Function | GO:0005220 | inositol 1,4,5-trisphosphate-<br>sensitive calcium-release<br>channel activity | 2/2321 | 3/18352  | 0.0439256 | 0.4529959 | 0.4277516 | 2 | ITPR2/ITPR1                                          |
| Molecular Function | GO:0008321 | Ral guanyl-nucleotide<br>exchange factor activity                              | 2/2321 | 3/18352  | 0.0439256 | 0.4529959 | 0.4277516 | 2 | RGL3/RALGPS1                                         |
| Molecular Function | GO:0008534 | oxidized purine nucleobase<br>lesion DNA N-glycosylase<br>activity             | 2/2321 | 3/18352  | 0.0439256 | 0.4529959 | 0.4277516 | 2 | NTHL1/MUTYH                                          |

|                    |            |                                                                                                      |        |         |           |           |           |   |               |
|--------------------|------------|------------------------------------------------------------------------------------------------------|--------|---------|-----------|-----------|-----------|---|---------------|
| Molecular Function | GO:0008934 | inositol monophosphate 1-phosphatase activity                                                        | 2/2321 | 3/18352 | 0.0439256 | 0.4529959 | 0.4277516 | 2 | IMPA2/INPP5F  |
| Molecular Function | GO:0015420 | ATPase-coupled vitamin B12 transmembrane transporter activity                                        | 2/2321 | 3/18352 | 0.0439256 | 0.4529959 | 0.4277516 | 2 | ABCC1/CD320   |
| Molecular Function | GO:0016672 | oxidoreductase activity, acting on a sulfur group of donors, quinone or similar compound as acceptor | 2/2321 | 3/18352 | 0.0439256 | 0.4529959 | 0.4277516 | 2 | GSTO1/GSTO2   |
| Molecular Function | GO:0019797 | procollagen-proline 3-dioxygenase activity                                                           | 2/2321 | 3/18352 | 0.0439256 | 0.4529959 | 0.4277516 | 2 | P3H3/P3H1     |
| Molecular Function | GO:0030899 | calcium-dependent ATPase activity                                                                    | 2/2321 | 3/18352 | 0.0439256 | 0.4529959 | 0.4277516 | 2 | TNNT3/ATP2A3  |
| Molecular Function | GO:0031692 | alpha-1B adrenergic receptor binding                                                                 | 2/2321 | 3/18352 | 0.0439256 | 0.4529959 | 0.4277516 | 2 | ARRB1/ARRB2   |
| Molecular Function | GO:0031750 | D3 dopamine receptor binding                                                                         | 2/2321 | 3/18352 | 0.0439256 | 0.4529959 | 0.4277516 | 2 | PPP1R1B/PALM  |
| Molecular Function | GO:0031752 | D5 dopamine receptor binding                                                                         | 2/2321 | 3/18352 | 0.0439256 | 0.4529959 | 0.4277516 | 2 | PPP1R1B/GNA12 |
| Molecular Function | GO:0033142 | progesterone receptor binding                                                                        | 2/2321 | 3/18352 | 0.0439256 | 0.4529959 | 0.4277516 | 2 | PRMT2/NCOA1   |

|                    |            |                                               |        |         |           |           |           |   |              |
|--------------------|------------|-----------------------------------------------|--------|---------|-----------|-----------|-----------|---|--------------|
| Molecular Function | GO:0033188 | sphingomyelin synthase activity               | 2/2321 | 3/18352 | 0.0439256 | 0.4529959 | 0.4277516 | 2 | SGMS1/SGMS2  |
| Molecular Function | GO:0033745 | L-methionine-(R)-S-oxide reductase activity   | 2/2321 | 3/18352 | 0.0439256 | 0.4529959 | 0.4277516 | 2 | MSRB1/MSRB2  |
| Molecular Function | GO:0047493 | ceramide cholinephosphotransferase activity   | 2/2321 | 3/18352 | 0.0439256 | 0.4529959 | 0.4277516 | 2 | SGMS1/SGMS2  |
| Molecular Function | GO:0050692 | DNA binding domain binding                    | 2/2321 | 3/18352 | 0.0439256 | 0.4529959 | 0.4277516 | 2 | RXRA/PPARG   |
| Molecular Function | GO:0052642 | lysophosphatidic acid phosphatase activity    | 2/2321 | 3/18352 | 0.0439256 | 0.4529959 | 0.4277516 | 2 | ACP6/ACP3    |
| Molecular Function | GO:0052832 | inositol monophosphate 3-phosphatase activity | 2/2321 | 3/18352 | 0.0439256 | 0.4529959 | 0.4277516 | 2 | IMPA2/INPP5F |
| Molecular Function | GO:0052833 | inositol monophosphate 4-phosphatase activity | 2/2321 | 3/18352 | 0.0439256 | 0.4529959 | 0.4277516 | 2 | IMPA2/INPP5F |
| Molecular Function | GO:0052834 | inositol monophosphate phosphatase activity   | 2/2321 | 3/18352 | 0.0439256 | 0.4529959 | 0.4277516 | 2 | IMPA2/INPP5F |
| Molecular Function | GO:0070012 | oligopeptidase activity                       | 2/2321 | 3/18352 | 0.0439256 | 0.4529959 | 0.4277516 | 2 | PREP/NDEL1   |



|                    |            |                                                         |         |          |           |           |           |    |                                                                                                  |
|--------------------|------------|---------------------------------------------------------|---------|----------|-----------|-----------|-----------|----|--------------------------------------------------------------------------------------------------|
| Molecular Function | GO:0050660 | flavin adenine dinucleotide binding                     | 16/2321 | 81/18352 | 0.0452241 | 0.4641873 | 0.4383193 | 16 | ACAD8/D2HGDH/MICAL1/MICAL2/ACOXL/MICAL3/ACADM/POR/AIFM2/KDM1B/PPOX/ACOX2/DUS2/TXNRD2/ACADVL/AOX1 |
| Molecular Function | GO:0015168 | glycerol transmembrane transporter activity             | 3/2321  | 7/18352  | 0.0477037 | 0.4675818 | 0.4415246 | 3  | AQP1/AQP3/AQP9                                                                                   |
| Molecular Function | GO:0016833 | oxo-acid-lyase activity                                 | 3/2321  | 7/18352  | 0.0477037 | 0.4675818 | 0.4415246 | 3  | NPL/HOGA1/HMGCL                                                                                  |
| Molecular Function | GO:0016885 | ligase activity, forming carbon-carbon bonds            | 3/2321  | 7/18352  | 0.0477037 | 0.4675818 | 0.4415246 | 3  | PC/ACACB/ACACA                                                                                   |
| Molecular Function | GO:0031433 | telethonin binding                                      | 3/2321  | 7/18352  | 0.0477037 | 0.4675818 | 0.4415246 | 3  | KCNE1/TTN/MYOZ3                                                                                  |
| Molecular Function | GO:0033300 | dehydroascorbic acid transmembrane transporter activity | 3/2321  | 7/18352  | 0.0477037 | 0.4675818 | 0.4415246 | 3  | SLC2A14/SLC2A1/SLC23A1                                                                           |
| Molecular Function | GO:0042392 | sphingosine-1-phosphate phosphatase activity            | 3/2321  | 7/18352  | 0.0477037 | 0.4675818 | 0.4415246 | 3  | SGPP1/SGPP2/PLPP3                                                                                |
| Molecular Function | GO:0046030 | inositol trisphosphate phosphatase activity             | 3/2321  | 7/18352  | 0.0477037 | 0.4675818 | 0.4415246 | 3  | INPP5A/INPP5D/INPP5E                                                                             |
| Molecular Function | GO:0050291 | sphingosine N-acyltransferase activity                  | 3/2321  | 7/18352  | 0.0477037 | 0.4675818 | 0.4415246 | 3  | CERS6/CERS2/TLCD3B                                                                               |

|                    |            |                                                   |         |           |           |           |           |    |                                                                                                                                                                  |
|--------------------|------------|---------------------------------------------------|---------|-----------|-----------|-----------|-----------|----|------------------------------------------------------------------------------------------------------------------------------------------------------------------|
| Molecular Function | GO:0070324 | thyroid hormone binding                           | 3/2321  | 7/18352   | 0.0477037 | 0.4675818 | 0.4415246 | 3  | CTSH/PKM/CRYM                                                                                                                                                    |
| Molecular Function | GO:0070573 | metalloidpeptidase activity                       | 3/2321  | 7/18352   | 0.0477037 | 0.4675818 | 0.4415246 | 3  | CNDP2/CPQ/DPEP2                                                                                                                                                  |
| Molecular Function | GO:0005319 | lipid transporter activity                        | 24/2321 | 134/18352 | 0.0485818 | 0.4740542 | 0.4476364 | 24 | OSBPL5/SLC51A/ABCC1/SLC10A1/MFSD2A/TMEM30A/ABCG1/ANO7/PLTP/PITPNM2/ATP8B1/PITPNM1/OSBPL6/PITPNA/PCTP/ABCA1/OSBPL10/ABCC3/NPC1/PITPNC1/SLC2A1/ANO6/GRAMD1A/C2CD2L |
| Molecular Function | GO:0015248 | sterol transporter activity                       | 8/2321  | 33/18352  | 0.049292  | 0.4777802 | 0.4511547 | 8  | OSBPL5/ABCG1/PLTP/OSBPL6/ABCA1/OSBPL10/NPC1/GRAMD1A                                                                                                              |
| Molecular Function | GO:0120014 | phospholipid transfer activity                    | 6/2321  | 22/18352  | 0.0506182 | 0.4777802 | 0.4511547 | 6  | PLTP/PITPNM2/PITPNM1/PITPNA/PITPNC1/C2CD2L                                                                                                                       |
| Molecular Function | GO:0044390 | ubiquitin-like protein conjugating enzyme binding | 9/2321  | 39/18352  | 0.0507952 | 0.4777802 | 0.4511547 | 9  | RNF144A/RNF19A/TOLLIP/RNF144B/RNF14/RNF40/MARCHF6/PRKN/MARCHF7                                                                                                   |
| Molecular Function | GO:0016830 | carbon-carbon lyase activity                      | 11/2321 | 51/18352  | 0.0510772 | 0.4777802 | 0.4511547 | 11 | GADL1/NPL/ODC1/DDC/UXS1/HOGA1/PPCDC/BCKDHA/HMGCL/PCK2/PDXDC1                                                                                                     |
| Molecular Function | GO:0043130 | ubiquitin binding                                 | 15/2321 | 76/18352  | 0.0516719 | 0.4777802 | 0.4511547 | 15 | TOLLIP/RAE1/SMAD3/TNFAIP3/FBXO7/OTUB2/UBXN11/OTUB1/UBXN2A/NEDD4/MVB12A/UCHL3/PRKN/ILRUN/MARCHF7                                                                  |
| Molecular Function | GO:0019955 | cytokine binding                                  | 24/2321 | 135/18352 | 0.0522743 | 0.4777802 | 0.4511547 | 24 | ELANE/LTBP1/NRP2/CSF3R/TNFRSF1B/IL1R1/CCR2/TRAFF2/CSF1R/TGFBR2/ACKR2/THBS1/TNFRSF1A/CCR9/IL1RN/COP55/ITGB3/CXCR1/IL6R/ENG/IL18R1/CRLF1/CX3CR1/ACKR1              |

|                    |            |                                                                    |        |          |           |           |           |   |                                 |
|--------------------|------------|--------------------------------------------------------------------|--------|----------|-----------|-----------|-----------|---|---------------------------------|
| Molecular Function | GO:0005001 | transmembrane receptor<br>protein tyrosine phosphatase<br>activity | 5/2321 | 17/18352 | 0.0540334 | 0.4777802 | 0.4511547 | 5 | PTPRE/PTPN6/PTPRN2/PTPRC/PTPRU  |
| Molecular Function | GO:0015278 | calcium-release channel<br>activity                                | 5/2321 | 17/18352 | 0.0540334 | 0.4777802 | 0.4511547 | 5 | TRPM2/ITPR2/ITPR1/RASA3/TPCN2   |
| Molecular Function | GO:0019198 | transmembrane receptor<br>protein phosphatase activity             | 5/2321 | 17/18352 | 0.0540334 | 0.4777802 | 0.4511547 | 5 | PTPRE/PTPN6/PTPRN2/PTPRC/PTPRU  |
| Molecular Function | GO:0042800 | histone methyltransferase<br>activity (H3-K4 specific)             | 5/2321 | 17/18352 | 0.0540334 | 0.4777802 | 0.4511547 | 5 | ASH2L/WDR82/KMT2D/SETD1B/SETD1A |
| Molecular Function | GO:0140312 | cargo adaptor activity                                             | 5/2321 | 17/18352 | 0.0540334 | 0.4777802 | 0.4511547 | 5 | AP2A1/ARRB1/STON1/AP1G2/TEX261  |
| Molecular Function | GO:0000340 | RNA 7-methylguanosine cap<br>binding                               | 4/2321 | 12/18352 | 0.0547273 | 0.4777802 | 0.4511547 | 4 | LARP1/AGO2/CYFIP1/NCBP3         |
| Molecular Function | GO:0004875 | complement receptor<br>activity                                    | 4/2321 | 12/18352 | 0.0547273 | 0.4777802 | 0.4511547 | 4 | C3AR1/FPR2/FPR1/CSAR2           |
| Molecular Function | GO:0005165 | neurotrophin receptor<br>binding                                   | 4/2321 | 12/18352 | 0.0547273 | 0.4777802 | 0.4511547 | 4 | PIK3R1/NTRK1/PLCG1/NTF4         |
| Molecular Function | GO:0019992 | diacylglycerol binding                                             | 4/2321 | 12/18352 | 0.0547273 | 0.4777802 | 0.4511547 | 4 | PLTP/RAPGEF2/CHPT1/DGKD         |

|                    |            |                                                            |         |           |           |           |           |    |                                                                                                                                              |
|--------------------|------------|------------------------------------------------------------|---------|-----------|-----------|-----------|-----------|----|----------------------------------------------------------------------------------------------------------------------------------------------|
| Molecular Function | GO:0030955 | potassium ion binding                                      | 4/2321  | 12/18352  | 0.0547273 | 0.4777802 | 0.4511547 | 4  | HDAC4/PDXK/PKM/ACAT1                                                                                                                         |
| Molecular Function | GO:0031543 | peptidyl-proline dioxygenase activity                      | 4/2321  | 12/18352  | 0.0547273 | 0.4777802 | 0.4511547 | 4  | P4HB/P4HA2/P3H3/P3H1                                                                                                                         |
| Molecular Function | GO:0034595 | phosphatidylinositol phosphate 5-phosphatase activity      | 4/2321  | 12/18352  | 0.0547273 | 0.4777802 | 0.4511547 | 4  | SYNJ2/INPP5D/INPP5E/INPP5F                                                                                                                   |
| Molecular Function | GO:0140035 | ubiquitination-like modification-dependent protein binding | 4/2321  | 12/18352  | 0.0547273 | 0.4777802 | 0.4511547 | 4  | ANKRD13B/ANKRD13D/ANKRD13A/TP53BP1                                                                                                           |
| Molecular Function | GO:0019838 | growth factor binding                                      | 24/2321 | 136/18352 | 0.0561638 | 0.4777802 | 0.4511547 | 24 | LTBP1/NRP2/IL1R1/RHBDF2/TGFBR2/THBS1/PCSK6/ESM1/IGF1R/FLT1/FGFR1/IL1RN/ITGB3/HTRA4/IL6R/PDGFB/CRIM1/ENG/SORT1/NTRK1/COL5A1/HTRA3/PDGFRB/CCN4 |
| Molecular Function | GO:0001046 | core promoter sequence-specific DNA binding                | 10/2321 | 46/18352  | 0.0584033 | 0.4777802 | 0.4511547 | 10 | FOXP1/TAF1C/NRF1/AGO1/ZBTB17/HDAC1/AGO2/PIH1D1/CEBPB/RELA                                                                                    |
| Molecular Function | GO:0017080 | sodium channel regulator activity                          | 9/2321  | 40/18352  | 0.0584809 | 0.4777802 | 0.4511547 | 9  | FXYD2/YWHAH/FXYD1/GPLD1/SGK1/SNTA1/NEDD4/SGK2/FGF14                                                                                          |
| Molecular Function | GO:0015145 | monosaccharide transmembrane transporter activity          | 6/2321  | 23/18352  | 0.0614244 | 0.4777802 | 0.4511547 | 6  | SLC2A5/SLC2A14/SLC2A9/SLC5A10/SLC2A1/SLC23A1                                                                                                 |
| Molecular Function | GO:0070412 | R-SMAD binding                                             | 6/2321  | 23/18352  | 0.0614244 | 0.4777802 | 0.4511547 | 6  | SMAD3/LDLRAD4/ZEB2/SMURF1/ZC3H3/ANKRD1                                                                                                       |

|                    |            |                                                             |         |           |           |           |           |    |                                                                                                                                                                                                                                                                                                                                                                                                                |
|--------------------|------------|-------------------------------------------------------------|---------|-----------|-----------|-----------|-----------|----|----------------------------------------------------------------------------------------------------------------------------------------------------------------------------------------------------------------------------------------------------------------------------------------------------------------------------------------------------------------------------------------------------------------|
| Molecular Function | GO:0016667 | oxidoreductase activity, acting on a sulfur group of donors | 12/2321 | 59/18352  | 0.0631267 | 0.4777802 | 0.4511547 | 12 | P4HB/MSRB1/MSRB2/MSRA/PDIA5/TMX1/STAB2/NXN/GSTO1/GLRX2/TXNRD2/GSTO2                                                                                                                                                                                                                                                                                                                                            |
| Molecular Function | GO:0005217 | intracellular ligand-gated ion channel activity             | 7/2321  | 29/18352  | 0.0651781 | 0.4777802 | 0.4511547 | 7  | TRPM2/ITPR2/ITPR1/RASA3/AQP1/CNGA4/TPCN2                                                                                                                                                                                                                                                                                                                                                                       |
| Molecular Function | GO:0005520 | insulin-like growth factor binding                          | 7/2321  | 29/18352  | 0.0651781 | 0.4777802 | 0.4511547 | 7  | ESM1/IGF1R/ITGB3/HTRA4/CRIM1/HTRA3/CCN4                                                                                                                                                                                                                                                                                                                                                                        |
| Molecular Function | GO:0019888 | protein phosphatase regulator activity                      | 16/2321 | 85/18352  | 0.0656788 | 0.4777802 | 0.4511547 | 16 | LMTK2/MGAT5/PPP1R1B/URI1/CABIN1/ELFN2/RCAN1/PHACTR2/PPP2R5C/PPP2R1A/PPP2R5E/PPP2R5D/PPP2R1B/PPP1R16B/ANKLE2/PTPA                                                                                                                                                                                                                                                                                               |
| Molecular Function | GO:0030165 | PDZ domain binding                                          | 16/2321 | 85/18352  | 0.0656788 | 0.4777802 | 0.4511547 | 16 | LNX1/CCDC88C/TBC1D10A/ATP2B2/ERC1/BAIAP2/SDC2/RAPGEF2/PLEKHA2/CRIM1/SLC22A5/SNTA1/SNTB1/CADM1/PDZK1/PRKN                                                                                                                                                                                                                                                                                                       |
| Molecular Function | GO:0016831 | carboxy-lyase activity                                      | 8/2321  | 35/18352  | 0.0667212 | 0.4777802 | 0.4511547 | 8  | GADL1/ODC1/DDC/UXS1/PPCDC/BCKDHA/PCK2/PDXDC1                                                                                                                                                                                                                                                                                                                                                                   |
| Molecular Function | GO:0015036 | disulfide oxidoreductase activity                           | 9/2321  | 41/18352  | 0.0668751 | 0.4777802 | 0.4511547 | 9  | P4HB/PDIA5/TMX1/STAB2/NXN/GSTO1/GLRX2/TXNRD2/GSTO2                                                                                                                                                                                                                                                                                                                                                             |
| Molecular Function | GO:0042834 | peptidoglycan binding                                       | 5/2321  | 18/18352  | 0.0673005 | 0.4777802 | 0.4511547 | 5  | HK1/NLRP3/PGLYRP1/NOD2/PGLYRP4                                                                                                                                                                                                                                                                                                                                                                                 |
| Molecular Function | GO:0008509 | anion transmembrane transporter activity                    | 55/2321 | 357/18352 | 0.0691707 | 0.4777802 | 0.4511547 | 55 | SLC38A4/CLCN6/SLC25A25/SLC38A10/SLC51A/ABCC1/SLC16A3/SLC10A1/MFSD2A/SLC24A4/FXYD1/SLC1A5/SLC2A14/ABCC2/ANO7/SLC15A4/SLC44A4/SLC2A9/LRRC8C/SLC13A4/SLC43A2/SLC19A1/SLC26A1/SLC22A11/SLC03A1/SLC1A2/SLC7A7/SLC7A5/SFXN1/SLC1A6/SLC37A1/SLC16A5/ABCC3/MFSD10/SLC16A1/SLC36A3/SLC1A3/LRRC8B/SLC52A2/SLC33A1/SLC43A1/ABCC11/ANO10/SLC2A1/ANO6/SLC7A8/SLC13A5/SLC12A1/ANO8/SLC7A1/SLC12A7/SLC25A1/SLC23A1/AQP9/PACC1 |

|                    |            |                                                                                               |        |         |           |           |           |   |                      |
|--------------------|------------|-----------------------------------------------------------------------------------------------|--------|---------|-----------|-----------|-----------|---|----------------------|
| Molecular Function | GO:0001224 | RNA polymerase II transcription cofactor binding                                              | 3/2321 | 8/18352 | 0.0693015 | 0.4777802 | 0.4511547 | 3 | CREB1/NFATC1/RELA    |
| Molecular Function | GO:0004571 | mannosyl-oligosaccharide 1,2-alpha-mannosidase activity                                       | 3/2321 | 8/18352 | 0.0693015 | 0.4777802 | 0.4511547 | 3 | EDEM1/EDEM2/MAN1C1   |
| Molecular Function | GO:0008061 | chitin binding                                                                                | 3/2321 | 8/18352 | 0.0693015 | 0.4777802 | 0.4511547 | 3 | CHI3L1/CHIT1/CHI3L2  |
| Molecular Function | GO:0016624 | oxidoreductase activity, acting on the aldehyde or oxo group of donors, disulfide as acceptor | 3/2321 | 8/18352 | 0.0693015 | 0.4777802 | 0.4511547 | 3 | DHTKD1/OGDH/BCKDHA   |
| Molecular Function | GO:0017169 | CDP-alcohol phosphatidyltransferase activity                                                  | 3/2321 | 8/18352 | 0.0693015 | 0.4777802 | 0.4511547 | 3 | PGS1/CHPT1/PTDSS2    |
| Molecular Function | GO:0031701 | angiotensin receptor binding                                                                  | 3/2321 | 8/18352 | 0.0693015 | 0.4777802 | 0.4511547 | 3 | ARRB1/ARAP1/ARRB2    |
| Molecular Function | GO:0038036 | sphingosine-1-phosphate receptor activity                                                     | 3/2321 | 8/18352 | 0.0693015 | 0.4777802 | 0.4511547 | 3 | SPHK2/S1PR2/S1PR4    |
| Molecular Function | GO:0043139 | 5'-3' DNA helicase activity                                                                   | 3/2321 | 8/18352 | 0.0693015 | 0.4777802 | 0.4511547 | 3 | IGHMBP2/RUVBL1/ERCC2 |
| Molecular Function | GO:0045322 | unmethylated CpG binding                                                                      | 3/2321 | 8/18352 | 0.0693015 | 0.4777802 | 0.4511547 | 3 | KDM2A/TLR9/FBXL19    |

|                    |            |                                                                                                   |         |          |           |           |           |    |                                                                                                                            |
|--------------------|------------|---------------------------------------------------------------------------------------------------|---------|----------|-----------|-----------|-----------|----|----------------------------------------------------------------------------------------------------------------------------|
| Molecular Function | GO:0046920 | alpha-(1->3)-<br>fucosyltransferase activity                                                      | 3/2321  | 8/18352  | 0.0693015 | 0.4777802 | 0.4511547 | 3  | FUT4/FUT7/FUT11                                                                                                            |
| Molecular Function | GO:0019208 | phosphatase regulator<br>activity                                                                 | 18/2321 | 99/18352 | 0.0705707 | 0.4777802 | 0.4511547 | 18 | LMTK2/MGAT5/PPP1R1B/URI1/CABIN1/ZEB2/TESC/ELFN2/RCAN1/PHACTR2/PPP2R5C/PPP2R1A/PPP2R5E/PPP2R5D/PPP2R1B/PPP1R16B/ANKLE2/PTPA |
| Molecular Function | GO:0001162 | RNA polymerase II intronic<br>transcription regulatory<br>region sequence-specific<br>DNA binding | 4/2321  | 13/18352 | 0.0713856 | 0.4777802 | 0.4511547 | 4  | RXRA/SMYD3/ZC3H8/NCOA2                                                                                                     |
| Molecular Function | GO:0005024 | transforming growth factor<br>beta-activated receptor<br>activity                                 | 4/2321  | 13/18352 | 0.0713856 | 0.4777802 | 0.4511547 | 4  | LTBP1/TGFBR2/BMPR1B/ENG                                                                                                    |
| Molecular Function | GO:0005041 | low-density lipoprotein<br>particle receptor activity                                             | 4/2321  | 13/18352 | 0.0713856 | 0.4777802 | 0.4511547 | 4  | SORL1/OLR1/STAB2/LRP10                                                                                                     |
| Molecular Function | GO:0019104 | DNA N-glycosylase activity                                                                        | 4/2321  | 13/18352 | 0.0713856 | 0.4777802 | 0.4511547 | 4  | NEIL3/UNG/NTHL1/MUTYH                                                                                                      |
| Molecular Function | GO:0034236 | protein kinase A catalytic<br>subunit binding                                                     | 4/2321  | 13/18352 | 0.0713856 | 0.4777802 | 0.4511547 | 4  | PRKAR1B/CSK/KCNQ1/EZR                                                                                                      |
| Molecular Function | GO:0070679 | inositol 1,4,5 trisphosphate<br>binding                                                           | 4/2321  | 13/18352 | 0.0713856 | 0.4777802 | 0.4511547 | 4  | ITPR2/ITPR1/PLCL1/RPH3A                                                                                                    |
| Molecular Function | GO:0072542 | protein phosphatase<br>activator activity                                                         | 4/2321  | 13/18352 | 0.0713856 | 0.4777802 | 0.4511547 | 4  | PPP2R5C/PPP2R5E/PPP2R5D/PTPA                                                                                               |

|                    |            |                                                             |         |           |           |           |           |    |                                                                                                                            |
|--------------------|------------|-------------------------------------------------------------|---------|-----------|-----------|-----------|-----------|----|----------------------------------------------------------------------------------------------------------------------------|
| Molecular Function | GO:0106019 | phosphatidylinositol-4,5-bisphosphate phosphatase activity  | 4/2321  | 13/18352  | 0.0713856 | 0.4777802 | 0.4511547 | 4  | SYNJ2/INPP5D/INPP4A/INPP5E                                                                                                 |
| Molecular Function | GO:0038024 | cargo receptor activity                                     | 14/2321 | 73/18352  | 0.0717157 | 0.4777802 | 0.4511547 | 14 | SORL1/OLR1/LOXL3/FPR2/ACKR2/COLEC12/MIA3/ASGR2/MARCO/STAB2/LRP10/ABCA1/ITGB2/LOXL4                                         |
| Molecular Function | GO:0003950 | NAD+ ADP-ribosyltransferase activity                        | 6/2321  | 24/18352  | 0.0734884 | 0.4777802 | 0.4511547 | 6  | TNKS/PARP4/ART5/ART4/PARP10/PARP9                                                                                          |
| Molecular Function | GO:0019957 | C-C chemokine binding                                       | 6/2321  | 24/18352  | 0.0734884 | 0.4777802 | 0.4511547 | 6  | CCR2/ACKR2/CCR9/CXCR1/CX3CR1/ACKR1                                                                                         |
| Molecular Function | GO:1901618 | organic hydroxy compound transmembrane transporter activity | 10/2321 | 48/18352  | 0.0744937 | 0.4777802 | 0.4511547 | 10 | SLC51A/SLC16A3/SLC10A1/ABCG1/AQP1/ABCC3/MFSD10/SLC16A1/AQP3/AQP9                                                           |
| Molecular Function | GO:0019199 | transmembrane receptor protein kinase activity              | 15/2321 | 80/18352  | 0.0750765 | 0.4777802 | 0.4511547 | 15 | LTBP1/NRP2/CSF1R/EPHB3/TGFBR2/IGF1R/FLT1/FGFR1/BMPR1B/CRIM1/ENG/NTRK1/INSRR/PDGFRB/TYRO3                                   |
| Molecular Function | GO:0120013 | lipid transfer activity                                     | 9/2321  | 42/18352  | 0.0759874 | 0.4777802 | 0.4511547 | 9  | ABCG1/PLTP/PITPNM2/PITPNM1/PITPNA/ABCA1/PITPNC1/GRAMD1A/C2CD2L                                                             |
| Molecular Function | GO:0042626 | ATPase-coupled transmembrane transporter activity           | 18/2321 | 100/18352 | 0.0763386 | 0.4777802 | 0.4511547 | 18 | ABCC1/FXYD2/ABCG1/ATP8A1/ABCC2/ATP2B2/ATP6V1B2/RALBP1/CD320/ABCA1/ATP2A3/ABCC3/ATP6V0B/ABCB8/ABCC11/ATP7B/ATP6V0C/ATP6V1C1 |
| Molecular Function | GO:0000702 | oxidized base lesion DNA N-glycosylase activity             | 2/2321  | 4/18352   | 0.0805345 | 0.4777802 | 0.4511547 | 2  | NTHL1/MUTYH                                                                                                                |



|                    |            |                                                                   |        |         |           |           |           |   |                 |
|--------------------|------------|-------------------------------------------------------------------|--------|---------|-----------|-----------|-----------|---|-----------------|
| Molecular Function | GO:0001595 | angiotensin receptor activity                                     | 2/2321 | 4/18352 | 0.0805345 | 0.4777802 | 0.4511547 | 2 | AGTRAP/AGTR1    |
| Molecular Function | GO:0003836 | beta-galactoside (CMP)<br>alpha-2,3-sialyltransferase<br>activity | 2/2321 | 4/18352 | 0.0805345 | 0.4777802 | 0.4511547 | 2 | ST3GAL4/ST3GAL2 |
| Molecular Function | GO:0003873 | 6-phosphofructo-2-kinase<br>activity                              | 2/2321 | 4/18352 | 0.0805345 | 0.4777802 | 0.4511547 | 2 | PFKFB4/PFKFB3   |
| Molecular Function | GO:0004305 | ethanolamine kinase activity                                      | 2/2321 | 4/18352 | 0.0805345 | 0.4777802 | 0.4511547 | 2 | CHKB/ETNK2      |
| Molecular Function | GO:0004634 | phosphopyruvate hydratase<br>activity                             | 2/2321 | 4/18352 | 0.0805345 | 0.4777802 | 0.4511547 | 2 | ENO1/ENO3       |
| Molecular Function | GO:0004945 | angiotensin type II receptor<br>activity                          | 2/2321 | 4/18352 | 0.0805345 | 0.4777802 | 0.4511547 | 2 | AGTRAP/AGTR1    |
| Molecular Function | GO:0004974 | leukotriene receptor activity                                     | 2/2321 | 4/18352 | 0.0805345 | 0.4777802 | 0.4511547 | 2 | LTB4R2/LTB4R    |
| Molecular Function | GO:0005030 | neurotrophin receptor<br>activity                                 | 2/2321 | 4/18352 | 0.0805345 | 0.4777802 | 0.4511547 | 2 | SORT1/NTRK1     |
| Molecular Function | GO:0005534 | galactose binding                                                 | 2/2321 | 4/18352 | 0.0805345 | 0.4777802 | 0.4511547 | 2 | COLEC12/ENG     |

|                    |            |                                                                                                                 |        |         |           |           |           |   |                 |
|--------------------|------------|-----------------------------------------------------------------------------------------------------------------|--------|---------|-----------|-----------|-----------|---|-----------------|
| Molecular Function | GO:0008457 | beta-galactosyl-N-acetylglucosaminylgalactosylglucosyl-ceramide beta-1,3-acetylglucosaminyltransferase activity | 2/2321 | 4/18352 | 0.0805345 | 0.4777802 | 0.4511547 | 2 | B3GNT5/B3GNT2   |
| Molecular Function | GO:0008745 | N-acetylmuramoyl-L-alanine amidase activity                                                                     | 2/2321 | 4/18352 | 0.0805345 | 0.4777802 | 0.4511547 | 2 | PGLYRP1/PGLYRP4 |
| Molecular Function | GO:0015086 | cadmium ion transmembrane transporter activity                                                                  | 2/2321 | 4/18352 | 0.0805345 | 0.4777802 | 0.4511547 | 2 | SLC11A1/SLC11A2 |
| Molecular Function | GO:0015137 | citrate transmembrane transporter activity                                                                      | 2/2321 | 4/18352 | 0.0805345 | 0.4777802 | 0.4511547 | 2 | SLC13A5/SLC25A1 |
| Molecular Function | GO:0015142 | tricarboxylic acid transmembrane transporter activity                                                           | 2/2321 | 4/18352 | 0.0805345 | 0.4777802 | 0.4511547 | 2 | SLC13A5/SLC25A1 |
| Molecular Function | GO:0015247 | aminophospholipid flippase activity                                                                             | 2/2321 | 4/18352 | 0.0805345 | 0.4777802 | 0.4511547 | 2 | TMEM30A/ATP8B1  |
| Molecular Function | GO:0019136 | deoxynucleoside kinase activity                                                                                 | 2/2321 | 4/18352 | 0.0805345 | 0.4777802 | 0.4511547 | 2 | TK2/TK1         |
| Molecular Function | GO:0031544 | peptidyl-proline 3-dioxygenase activity                                                                         | 2/2321 | 4/18352 | 0.0805345 | 0.4777802 | 0.4511547 | 2 | P3H3/P3H1       |
| Molecular Function | GO:0033743 | peptide-methionine (R)-S-oxide reductase activity                                                               | 2/2321 | 4/18352 | 0.0805345 | 0.4777802 | 0.4511547 | 2 | MSRB1/MSRB2     |

|                    |            |                                               |         |          |           |           |           |    |                                                                                                    |
|--------------------|------------|-----------------------------------------------|---------|----------|-----------|-----------|-----------|----|----------------------------------------------------------------------------------------------------|
| Molecular Function | GO:0052735 | tRNA (cytosine-3-)-methyltransferase activity | 2/2321  | 4/18352  | 0.0805345 | 0.4777802 | 0.4511547 | 2  | METTL6/METTL8                                                                                      |
| Molecular Function | GO:0140031 | phosphorylation-dependent protein binding     | 2/2321  | 4/18352  | 0.0805345 | 0.4777802 | 0.4511547 | 2  | PTPN6/ANK2                                                                                         |
| Molecular Function | GO:0015295 | solute:proton symporter activity              | 5/2321  | 19/18352 | 0.0822034 | 0.4777802 | 0.4511547 | 5  | SLC45A4/SLC11A2/SLC2A9/SLC36A3/SLC33A1                                                             |
| Molecular Function | GO:0043138 | 3'-5' DNA helicase activity                   | 5/2321  | 19/18352 | 0.0822034 | 0.4777802 | 0.4511547 | 5  | BLM/MCM5/RECQL5/MCM2/FBH1                                                                          |
| Molecular Function | GO:0035591 | signaling adaptor activity                    | 13/2321 | 68/18352 | 0.0822484 | 0.4777802 | 0.4511547 | 13 | KSR1/LAT/AKAP13/PIK3R1/GAB2/NCK2/DEDD2/DOK2/AXIN1/MAPK8IP2/MPP7/SHANK2/SLA2                        |
| Molecular Function | GO:0043175 | RNA polymerase core enzyme binding            | 12/2321 | 62/18352 | 0.0859147 | 0.4777802 | 0.4511547 | 12 | BRD4/MIR140/MIR145/WDR43/URI1/AGO1/RECQL5/SMYD3/AGO2/ESRRB/SCAF8/RPRD1B                            |
| Molecular Function | GO:0004407 | histone deacetylase activity                  | 6/2321  | 25/18352 | 0.0868024 | 0.4777802 | 0.4511547 | 6  | HDAC4/HDAC7/SIN3B/HDAC1/MTA2/SIRT3                                                                 |
| Molecular Function | GO:0051119 | sugar transmembrane transporter activity      | 6/2321  | 25/18352 | 0.0868024 | 0.4777802 | 0.4511547 | 6  | SLC2A5/SLC2A14/SLC2A9/SLC5A10/SLC2A1/SLC23A1                                                       |
| Molecular Function | GO:0008238 | exopeptidase activity                         | 17/2321 | 95/18352 | 0.0868762 | 0.4777802 | 0.4511547 | 17 | CTSZ/LNPEP/CPD/CNDP2/CTSH/CPQ/AGBL5/DPP3/XPNPEP1/VASH1/AEBP1/RNPEPL1/CPB2/DPEP2/AGBL2/MINDY1/AOPEP |

|                    |            |                                                                          |         |           |           |           |           |    |                                                                                                                                                                                                                                                                                                                     |
|--------------------|------------|--------------------------------------------------------------------------|---------|-----------|-----------|-----------|-----------|----|---------------------------------------------------------------------------------------------------------------------------------------------------------------------------------------------------------------------------------------------------------------------------------------------------------------------|
| Molecular Function | GO:0051059 | NF-kappaB binding                                                        | 7/2321  | 31/18352  | 0.0880935 | 0.4777802 | 0.4511547 | 7  | HDAC1/CPNE1/BCL10/RNF25/TP53BP2/RELA/COMMD6                                                                                                                                                                                                                                                                         |
| Molecular Function | GO:0015171 | amino acid transmembrane transporter activity                            | 15/2321 | 82/18352  | 0.0890282 | 0.4777802 | 0.4511547 | 15 | SLC38A4/SLC38A10/SLC1A5/SLC15A4/SLC43A2/SLC1A2/SLC7A7/SLC7A5/SFXN1/SLC1A6/SLC36A3/SLC1A3/SLC43A1/SLC7A8/SLC7A1                                                                                                                                                                                                      |
| Molecular Function | GO:0015293 | symporter activity                                                       | 24/2321 | 143/18352 | 0.0892302 | 0.4777802 | 0.4511547 | 24 | SLC38A4/SLC16A3/SLC10A1/MFSD2A/SLC45A4/SLC24A4/SLC1A5/SLC11A2/SLC15A4/SLC2A9/SLC13A4/SLC1A2/SLC1A6/SLC22A5/SLC16A5/SLC16A1/SLC36A3/SLC1A3/SLC33A1/SLC5A10/SLC13A5/SLC12A1/SLC12A7/SLC23A1                                                                                                                           |
| Molecular Function | GO:0001222 | transcription corepressor binding                                        | 4/2321  | 14/18352  | 0.0903054 | 0.4777802 | 0.4511547 | 4  | PHF12/NEK6/PER2/PER1                                                                                                                                                                                                                                                                                                |
| Molecular Function | GO:0008494 | translation activator activity                                           | 4/2321  | 14/18352  | 0.0903054 | 0.4777802 | 0.4511547 | 4  | LARP1/CTIF/MIF4GD/PAIP1                                                                                                                                                                                                                                                                                             |
| Molecular Function | GO:0071933 | Arp2/3 complex binding                                                   | 4/2321  | 14/18352  | 0.0903054 | 0.4777802 | 0.4511547 | 4  | WHAMM/GMFB/AVIL/GMFG                                                                                                                                                                                                                                                                                                |
| Molecular Function | GO:0019887 | protein kinase regulator activity                                        | 30/2321 | 185/18352 | 0.090505  | 0.4777802 | 0.4511547 | 30 | RPTOR/SPRED2/PRKAG2/SH3BP5L/ITPRIP/PPP1R1B/PRKAR1B/CCL5/SH3BP5/TESC/PRKRIP1/WNT11/DGKQ/GMFB/GHRL/CAB39/STK3/CCNH/TAOK3/CCNA1/DUS2/LTF/TRIB1/MARK2/HEXIM1/CCNY/GMFG/CCNYL1/DAZAP2/CCNP                                                                                                                               |
| Molecular Function | GO:0001227 | DNA-binding transcription repressor activity, RNA polymerase II-specific | 51/2321 | 335/18352 | 0.0909709 | 0.4777802 | 0.4511547 | 51 | FOXK1/ARID5B/ZFPM1/IRF8/GFI1/ENO1/PPARG/ZNF217/SKI/HMBOX1/KLF16/ZEB2/NFATC2/BCL11A/E2F7/ZFHX3/ZBTB16/ZNF778/NACC2/ZBTB17/ZNF425/ZBTB25/ZBTB2/OVOL1/ZNF746/BACH2/ZC3H8/SP3/PRDM2/ZNF398/ETV6/ZNF77/ELK3/TCFL5/AEBP1/ZBTB37/E2F6/TCF3/ZNF668/ZBTB4/BCL6B/ZBTB49/CEBPB/FOXO1/HHEX/BACH1/RELA/ZNF219/ZNF487/CUX2/ZBTB26 |
| Molecular Function | GO:0016763 | transferase activity, transferring pentosyl groups                       | 10/2321 | 50/18352  | 0.0931    | 0.4777802 | 0.4511547 | 10 | XXYLT1/TNKS/XYLT1/GXYLT2/PARP4/ART5/PNP/ART4/PARP10/PARP9                                                                                                                                                                                                                                                           |

|                    |            |                                                                                    |         |           |           |           |           |    |                                                                                                                                                                                                                                                                                                                    |
|--------------------|------------|------------------------------------------------------------------------------------|---------|-----------|-----------|-----------|-----------|----|--------------------------------------------------------------------------------------------------------------------------------------------------------------------------------------------------------------------------------------------------------------------------------------------------------------------|
| Molecular Function | GO:0005126 | cytokine receptor binding                                                          | 42/2321 | 271/18352 | 0.0941278 | 0.4777802 | 0.4511547 | 42 | LRG1/IL27/SPRED2/IL10/TOLLIP/TGFBRAP1/PIK3R1/CCR2/SMAD3/TNF/TRAF2/CCL5/TRAF1/TNFSF13B/TLR9/TGFBR2/RIPK1/SMAD7/JAK1/TGFB1/IL1RN/DEFB1/CSF3/CCL20/ITGB3/IL6R/C10orf99/ENG/NTRK1/CNIH4/TNFSF12/TNFSF13/PLCG1/CRLF1/SIVA1/CCL27/NTF4/CCL22/LIF/FADD/YARS1/BABAM2                                                       |
| Molecular Function | GO:0003810 | protein-glutamine gamma-glutamyltransferase activity                               | 3/2321  | 9/18352   | 0.0944598 | 0.4777802 | 0.4511547 | 3  | TGM5/TGM3/EPB42                                                                                                                                                                                                                                                                                                    |
| Molecular Function | GO:0004439 | phosphatidylinositol-4,5-bisphosphate 5-phosphatase activity                       | 3/2321  | 9/18352   | 0.0944598 | 0.4777802 | 0.4511547 | 3  | SYNJ2/INPP5D/INPP5E                                                                                                                                                                                                                                                                                                |
| Molecular Function | GO:0016671 | oxidoreductase activity, acting on a sulfur group of donors, disulfide as acceptor | 3/2321  | 9/18352   | 0.0944598 | 0.4777802 | 0.4511547 | 3  | MSRB1/MSRB2/MSRA                                                                                                                                                                                                                                                                                                   |
| Molecular Function | GO:0019206 | nucleoside kinase activity                                                         | 3/2321  | 9/18352   | 0.0944598 | 0.4777802 | 0.4511547 | 3  | TK2/UCK2/TK1                                                                                                                                                                                                                                                                                                       |
| Molecular Function | GO:0042608 | T cell receptor binding                                                            | 3/2321  | 9/18352   | 0.0944598 | 0.4777802 | 0.4511547 | 3  | LCK/EP8L1/DOCK2                                                                                                                                                                                                                                                                                                    |
| Molecular Function | GO:0043121 | neurotrophin binding                                                               | 3/2321  | 9/18352   | 0.0944598 | 0.4777802 | 0.4511547 | 3  | PCSK6/SORT1/NTRK1                                                                                                                                                                                                                                                                                                  |
| Molecular Function | GO:0001217 | DNA-binding transcription repressor activity                                       | 51/2321 | 336/18352 | 0.0945925 | 0.4777802 | 0.4511547 | 51 | FOXK1/ARID5B/ZFPM1/IRF8/GFI1/ENO1/PPARG/ZNF217/SKI/HMBOX1/KLF16/ZEB2/NFATC2/BCL11A/E2F7/ZFH3/ZBTB16/ZNF778/NACC2/ZBTB17/ZNF425/ZBTB25/ZBTB2/OVOL1/ZNF746/BACH2/ZC3H8/SP3/PRDM2/ZNF398/ETV6/ZNF77/ELK3/TCFL5/AEBP1/ZBTB37/E2F6/TCF3/ZNF668/ZBTB4/BCL6B/ZBTB49/CEBPB/FOXO1/HHEX/BACH1/RELA/ZNF219/ZNF487/CUX2/ZBTB26 |
| Molecular Function | GO:0001664 | G protein-coupled receptor binding                                                 | 45/2321 | 293/18352 | 0.0959007 | 0.4777802 | 0.4511547 | 45 | PDE4D/CCDC88C/PPP1R1B/CCR2/ARRB1/DNM2/CCL5/FPR1/PNOC/GNAZ/ARAP1/GNAI2/MRAP/AKAP5/SLC9A3R2/GNAT2/WNT11/PHB/MARCO/RAPGEF2/FCN1/DEFB1/CCL20/GNA11/GHRL/WNT5B/SH3GL1/C10orf99/PALM/ARRB2/DNM1/RALA/DNM3/S1PR2/GNAO1/GNA12/CNIH4/NEDD4/AGTR1/CCL27/NPY/CCL22/GRK2/PRKN/YARS1                                            |

|                    |            |                                                     |         |           |           |           |           |    |                                                                                                                                                                                                                                                                                               |
|--------------------|------------|-----------------------------------------------------|---------|-----------|-----------|-----------|-----------|----|-----------------------------------------------------------------------------------------------------------------------------------------------------------------------------------------------------------------------------------------------------------------------------------------------|
| Molecular Function | GO:0015291 | secondary active transmembrane transporter activity | 37/2321 | 236/18352 | 0.0973638 | 0.4777802 | 0.4511547 | 37 | SLC38A4/CLCN6/SLC16A3/SLC10A1/MFSD2A/SLC45A4/SLC35C2/SLC11A1/SLC24A4/SLC1A5/SLC8A1/SLC11A2/SLC15A4/SLC2A9/SLC13A4/SLC19A1/SLC26A1/SLC22A11/SLCO3A1/SLC1A2/SLC7A5/SLC1A6/SLC22A5/SLC37A1/SLC16A5/SLC16A1/SLC36A3/SLC1A3/SLC33A1/SLC5A10/SLC7A8/SLC13A5/SLC12A1/SLC12A7/SLC25A1/SLC23A1/SLC41A1 |
| Molecular Function | GO:0022853 | active ion transmembrane transporter activity       | 36/2321 | 229/18352 | 0.0979367 | 0.4777802 | 0.4511547 | 36 | SLC10A1/MFSD2A/SLC45A4/FXYD2/SLC11A1/SLC24A4/SLC8A1/ATP8A1/ATP2B2/SLC11A2/SLC2A9/ATP6V1B2/SLC13A4/SLC19A1/SLC26A1/SLC22A11/SLCO3A1/SLC1A2/ATP2A3/SLC1A6/SLC37A1/ABCC3/SLC36A3/SLC1A3/SLC33A1/ATP6V0B/SLC5A10/SLC13A5/ATP7B/SLC12A1/SLC12A7/SLC25A1/SLC23A1/SLC41A1/ATP6V0C/ATP6V1C1           |
| Molecular Function | GO:0030506 | ankyrin binding                                     | 5/2321  | 20/18352  | 0.0986957 | 0.4777802 | 0.4511547 | 5  | SLC8A1/KCNQ2/PTPRC/CDH1/SPTBN4                                                                                                                                                                                                                                                                |
| Molecular Function | GO:0035014 | phosphatidylinositol 3-kinase regulator activity    | 5/2321  | 20/18352  | 0.0986957 | 0.4777802 | 0.4511547 | 5  | PIK3R1/PIK3R6/PIK3R5/WDR81/SLA2                                                                                                                                                                                                                                                               |
| Molecular Function | GO:1990381 | ubiquitin-specific protease binding                 | 5/2321  | 20/18352  | 0.0986957 | 0.4777802 | 0.4511547 | 5  | AMFR/RHBDD2/DERL2/MARCHF6/PRKN                                                                                                                                                                                                                                                                |
| Molecular Function | GO:0043621 | protein self-association                            | 11/2321 | 57/18352  | 0.0989304 | 0.4777802 | 0.4511547 | 11 | FOXP1/PPARG/TTN/CCDC88C/TNFAIP3/CCL5/ATXN1/AGXT/BCL10/SLC2A1/SVIP                                                                                                                                                                                                                             |
| Molecular Function | GO:0019902 | phosphatase binding                                 | 31/2321 | 194/18352 | 0.1002238 | 0.4777802 | 0.4511547 | 31 | PPARG/LCK/PIK3R1/SMAD3/TRAF2/CSF1R/NFATC2/JUP/SNX3/SMG7/AKAP5/SLC9A3R2/PXN/JAK1/FER/SH3YL1/STRN4/CSK/SH3GL1/KCNQ1/BCL2/KIFAP3/ANAPC7/TSC2/FOXO1/PPP1R16B/PDLIM4/CD33/ANKLE2/SPTBN4/PTPA                                                                                                       |
| Molecular Function | GO:0005112 | Notch binding                                       | 6/2321  | 26/18352  | 0.1013426 | 0.4777802 | 0.4511547 | 6  | NCOR2/AAK1/CUL3/DLL1/NOTCH1/NOTCH4                                                                                                                                                                                                                                                            |
| Molecular Function | GO:0033558 | protein deacetylase activity                        | 6/2321  | 26/18352  | 0.1013426 | 0.4777802 | 0.4511547 | 6  | HDAC4/HDAC7/SIN3B/HDAC1/MTA2/SIRT3                                                                                                                                                                                                                                                            |

|                    |            |                                                   |         |           |           |           |           |    |                                                                                                                                                                                                 |
|--------------------|------------|---------------------------------------------------|---------|-----------|-----------|-----------|-----------|----|-------------------------------------------------------------------------------------------------------------------------------------------------------------------------------------------------|
| Molecular Function | GO:0034237 | protein kinase A regulatory subunit binding       | 6/2321  | 26/18352  | 0.1013426 | 0.4777802 | 0.4511547 | 6  | AKAP5/KCNQ1/ACBD3/PRRC1/EZR/AKAP7                                                                                                                                                               |
| Molecular Function | GO:0051018 | protein kinase A binding                          | 10/2321 | 51/18352  | 0.1033495 | 0.4777802 | 0.4511547 | 10 | AKAP13/PRKAR1B/AKAP5/RARA/CSK/KCNQ1/ACBD3/PRRC1/EZR/AKAP7                                                                                                                                       |
| Molecular Function | GO:0140097 | catalytic activity, acting on DNA                 | 33/2321 | 209/18352 | 0.1043915 | 0.4777802 | 0.4511547 | 33 | BLM/POLE/TOP1MT/TDP1/NEIL3/RTEL1/MCM5/WRNIP1/RECQL5/MEIOB/IGHMBP2/UNG/NTHL1/MCM2/SMARCAL1/DFFB/FTO/DNASE1L3/CHD9/DMC1/DNMT1/PLD3/ERCC1/CHD8/SLX4/RUVBL1/MUTYH/POLD3/ERCC2/POLE4/ISG20/POLI/FBH1 |
| Molecular Function | GO:0051213 | dioxygenase activity                              | 16/2321 | 91/18352  | 0.1066824 | 0.4777802 | 0.4511547 | 16 | P4HB/KDM4B/HGD/KDM2A/HSPBAP1/POR/KDM4C/FTO/TET2/ADO/KDM7A/ADI1/P4HA2/ASPH/P3H3/P3H1                                                                                                             |
| Molecular Function | GO:0004712 | protein serine/threonine/tyrosine kinase activity | 9/2321  | 45/18352  | 0.1076536 | 0.4777802 | 0.4511547 | 9  | DYRK4/RPS6KA1/MAP2K6/SGK1/RPS6KA2/CLK3/DYRK2/TESK2/MAPKAPK3                                                                                                                                     |
| Molecular Function | GO:0004620 | phospholipase activity                            | 18/2321 | 105/18352 | 0.1097956 | 0.4777802 | 0.4511547 | 18 | PLA2G15/MGLL/PLBD2/LIPC/ABHD16A/PLD1/GPLD1/SMPDL3B/CCL5/ABHD16B/PLCB1/PLCL1/PLA1A/PLD3/PLCG1/PLCD3/ASPG/LYPLA2                                                                                  |
| Molecular Function | GO:0016829 | lyase activity                                    | 30/2321 | 189/18352 | 0.1112528 | 0.4777802 | 0.4511547 | 30 | ENO1/HAL/ADCY2/GADL1/ADCY9/APMAP/NEIL3/NPL/CBS/ODC1/DDC/CDYL/FECH/ENOSF1/ENO3/UXS1/NTHL1/MGST2/SCLY/ADCY4/HOGA1/PPCDC/CA3/CA1/BCKDHA/HMGCL/PCK2/PDXDC1/CA12/DGLUCY                              |
| Molecular Function | GO:0004559 | alpha-mannosidase activity                        | 4/2321  | 15/18352  | 0.1113427 | 0.4777802 | 0.4511547 | 4  | EDEM1/EDEM2/MAN2C1/MAN1C1                                                                                                                                                                       |
| Molecular Function | GO:0004652 | polynucleotide adenylyltransferase activity       | 4/2321  | 15/18352  | 0.1113427 | 0.4777802 | 0.4511547 | 4  | TUT1/PAPOLG/TENT5C/TENT5A                                                                                                                                                                       |

|                    |            |                                                      |         |           |           |           |           |    |                                                                                                                                                                                                                      |
|--------------------|------------|------------------------------------------------------|---------|-----------|-----------|-----------|-----------|----|----------------------------------------------------------------------------------------------------------------------------------------------------------------------------------------------------------------------|
| Molecular Function | GO:0017136 | NAD-dependent histone deacetylase activity           | 4/2321  | 15/18352  | 0.1113427 | 0.4777802 | 0.4511547 | 4  | HDAC4/HDAC7/HDAC1/SIRT3                                                                                                                                                                                              |
| Molecular Function | GO:0017160 | Ral GTPase binding                                   | 4/2321  | 15/18352  | 0.1113427 | 0.4777802 | 0.4511547 | 4  | RALBP1/MYO1C/RGL3/RALGPS1                                                                                                                                                                                            |
| Molecular Function | GO:0035259 | glucocorticoid receptor binding                      | 4/2321  | 15/18352  | 0.1113427 | 0.4777802 | 0.4511547 | 4  | NCOR2/YWHAH/SMAD3/CEBPB                                                                                                                                                                                              |
| Molecular Function | GO:0048185 | activin binding                                      | 4/2321  | 15/18352  | 0.1113427 | 0.4777802 | 0.4511547 | 4  | TGFBR2/SMAD7/SMURF1/ENG                                                                                                                                                                                              |
| Molecular Function | GO:0051371 | muscle alpha-actinin binding                         | 4/2321  | 15/18352  | 0.1113427 | 0.4777802 | 0.4511547 | 4  | TTN/PRICKLE4/PDLIM2/PDLIM4                                                                                                                                                                                           |
| Molecular Function | GO:1901611 | phosphatidylglycerol binding                         | 4/2321  | 15/18352  | 0.1113427 | 0.4777802 | 0.4511547 | 4  | PLTP/ATP8B1/PITPNA/PITPNC1                                                                                                                                                                                           |
| Molecular Function | GO:0005310 | dicarboxylic acid transmembrane transporter activity | 8/2321  | 39/18352  | 0.1116462 | 0.4777802 | 0.4511547 | 8  | SLC1A5/ABCC2/SLC19A1/SLC26A1/SLC1A2/SLC1A6/SLC1A3/SLC13A5                                                                                                                                                            |
| Molecular Function | GO:0016409 | palmitoyltransferase activity                        | 8/2321  | 39/18352  | 0.1116462 | 0.4777802 | 0.4511547 | 8  | ZDHHC18/SPTLC2/ZDHHC14/ZDHHC2/ZDHHC7/ZDHHC17/ZDHHC1/CPT1A                                                                                                                                                            |
| Molecular Function | GO:0005539 | glycosaminoglycan binding                            | 36/2321 | 232/18352 | 0.112329  | 0.4777802 | 0.4511547 | 36 | AZU1/ELANE/CTSG/MPO/NRP2/SPOCK2/HK1/APLP2/VIT/CRISPLD2/LIPC/NLRP3/COLQ/ANXA6/TGFBR2/THBS1/APP/TNFAIP6/EGFLAM/TNXB/PCSK6/FGFR1/STAB2/ADAMTSL5/PGLYR P1/PTPRC/ENG/LYVE1/NOD2/COL5A1/SLIT3/LTF/PGLYRP4/EVA1C/SLIT1/CCN4 |



|                    |            |                                                |         |          |           |           |           |    |                                                         |
|--------------------|------------|------------------------------------------------|---------|----------|-----------|-----------|-----------|----|---------------------------------------------------------|
| Molecular Function | GO:0004879 | nuclear receptor activity                      | 10/2321 | 52/18352 | 0.1142236 | 0.4777802 | 0.4511547 | 10 | RXRA/PPARG/NR112/VDR/RARA/NR1H2/RARG/ESRRB/SREBF1/NR5A2 |
| Molecular Function | GO:0098531 | ligand-activated transcription factor activity | 10/2321 | 52/18352 | 0.1142236 | 0.4777802 | 0.4511547 | 10 | RXRA/PPARG/NR112/VDR/RARA/NR1H2/RARG/ESRRB/SREBF1/NR5A2 |
| Molecular Function | GO:0019956 | chemokine binding                              | 7/2321  | 33/18352 | 0.114989  | 0.4777802 | 0.4511547 | 7  | CCR2/ACKR2/CCR9/ITGB3/CXCR1/CX3CR1/ACKR1                |
| Molecular Function | GO:0071949 | FAD binding                                    | 7/2321  | 33/18352 | 0.114989  | 0.4777802 | 0.4511547 | 7  | D2HGDH/MICAL1/MICAL2/MICAL3/KDM1B/ACOX2/AOX1            |
| Molecular Function | GO:0005355 | glucose transmembrane transporter activity     | 5/2321  | 21/18352 | 0.1167065 | 0.4777802 | 0.4511547 | 5  | SLC2A5/SLC2A14/SLC2A9/SLC5A10/SLC2A1                    |
| Molecular Function | GO:0008373 | sialyltransferase activity                     | 5/2321  | 21/18352 | 0.1167065 | 0.4777802 | 0.4511547 | 5  | ST6GALNAC1/ST6GAL1/ST8SIA6/ST3GAL4/ST3GAL2              |
| Molecular Function | GO:0015149 | hexose transmembrane transporter activity      | 5/2321  | 21/18352 | 0.1167065 | 0.4777802 | 0.4511547 | 5  | SLC2A5/SLC2A14/SLC2A9/SLC5A10/SLC2A1                    |
| Molecular Function | GO:0019200 | carbohydrate kinase activity                   | 5/2321  | 21/18352 | 0.1167065 | 0.4777802 | 0.4511547 | 5  | NAGK/HK1/PFKFB4/HK2/PFKFB3                              |
| Molecular Function | GO:0051959 | dynein light intermediate chain binding        | 6/2321  | 27/18352 | 0.1170706 | 0.4777802 | 0.4511547 | 6  | DNAH3/CCDC88C/DYNC1H1/BICD2/CCDC88B/HOOK2               |

|                    |            |                                                                                        |         |          |           |           |           |    |                                                                                                |
|--------------------|------------|----------------------------------------------------------------------------------------|---------|----------|-----------|-----------|-----------|----|------------------------------------------------------------------------------------------------|
| Molecular Function | GO:0016627 | oxidoreductase activity,<br>acting on the CH-CH group of<br>donors                     | 11/2321 | 59/18352 | 0.1193366 | 0.4777802 | 0.4511547 | 11 | ACAD8/ACOXL/AKR1D1/ACADM/PPOX/ACOX2/DUS2/SDHD/DHODH/ZADH2/ACADVL                               |
| Molecular Function | GO:0043178 | alcohol binding                                                                        | 15/2321 | 86/18352 | 0.1215458 | 0.4777802 | 0.4511547 | 15 | OSBPL5/ITPR2/ADAP1/ANXA6/ABCG1/ITPR1/OSBPL6/ABCA1/OSBPL10/NPC1/PLCL1/ASTN2/RPH3A/PRKCE/GRAMD1A |
| Molecular Function | GO:0001094 | TFIID-class transcription<br>factor complex binding                                    | 3/2321  | 10/18352 | 0.1227185 | 0.4777802 | 0.4511547 | 3  | ERCC1/RUVBL1/FBL                                                                               |
| Molecular Function | GO:0004016 | adenylate cyclase activity                                                             | 3/2321  | 10/18352 | 0.1227185 | 0.4777802 | 0.4511547 | 3  | ADCY2/ADCY9/ADCY4                                                                              |
| Molecular Function | GO:0004679 | AMP-activated protein<br>kinase activity                                               | 3/2321  | 10/18352 | 0.1227185 | 0.4777802 | 0.4511547 | 3  | PRKAG2/PRKAB1/PRKAA1                                                                           |
| Molecular Function | GO:0005381 | iron ion transmembrane<br>transporter activity                                         | 3/2321  | 10/18352 | 0.1227185 | 0.4777802 | 0.4511547 | 3  | SLC25A37/SLC11A1/SLC11A2                                                                       |
| Molecular Function | GO:0015173 | aromatic amino acid<br>transmembrane transporter<br>activity                           | 3/2321  | 10/18352 | 0.1227185 | 0.4777802 | 0.4511547 | 3  | SLC15A4/SLC7A5/SLC7A1                                                                          |
| Molecular Function | GO:0015924 | mannosyl-oligosaccharide<br>mannosidase activity                                       | 3/2321  | 10/18352 | 0.1227185 | 0.4777802 | 0.4511547 | 3  | EDEM1/EDEM2/MAN1C1                                                                             |
| Molecular Function | GO:0016634 | oxidoreductase activity,<br>acting on the CH-CH group of<br>donors, oxygen as acceptor | 3/2321  | 10/18352 | 0.1227185 | 0.4777802 | 0.4511547 | 3  | ACOXL/PPOX/ACOX2                                                                               |

|                    |            |                                                              |        |          |           |           |           |   |                    |
|--------------------|------------|--------------------------------------------------------------|--------|----------|-----------|-----------|-----------|---|--------------------|
| Molecular Function | GO:0016725 | oxidoreductase activity, acting on CH or CH2 groups          | 3/2321 | 10/18352 | 0.1227185 | 0.4777802 | 0.4511547 | 3 | RRM2B/ACOX2/AOX1   |
| Molecular Function | GO:0031078 | histone deacetylase activity (H3-K14 specific)               | 3/2321 | 10/18352 | 0.1227185 | 0.4777802 | 0.4511547 | 3 | HDAC4/HDAC7/HDAC1  |
| Molecular Function | GO:0032041 | NAD-dependent histone deacetylase activity (H3-K14 specific) | 3/2321 | 10/18352 | 0.1227185 | 0.4777802 | 0.4511547 | 3 | HDAC4/HDAC7/HDAC1  |
| Molecular Function | GO:0046974 | histone methyltransferase activity (H3-K9 specific)          | 3/2321 | 10/18352 | 0.1227185 | 0.4777802 | 0.4511547 | 3 | EHMT2/PRDM16/MECOM |
| Molecular Function | GO:0070739 | protein-glutamic acid ligase activity                        | 3/2321 | 10/18352 | 0.1227185 | 0.4777802 | 0.4511547 | 3 | TLL4/TLL11/TLL1    |
| Molecular Function | GO:0070740 | tubulin-glutamic acid ligase activity                        | 3/2321 | 10/18352 | 0.1227185 | 0.4777802 | 0.4511547 | 3 | TLL4/TLL11/TLL1    |
| Molecular Function | GO:0102545 | phosphatidyl phospholipase B activity                        | 3/2321 | 10/18352 | 0.1227185 | 0.4777802 | 0.4511547 | 3 | PLA2G15/LIPC/ASPG  |
| Molecular Function | GO:0001851 | complement component C3b binding                             | 2/2321 | 5/18352  | 0.1231771 | 0.4777802 | 0.4511547 | 2 | PHB/ITGB2          |
| Molecular Function | GO:0002054 | nucleobase binding                                           | 2/2321 | 5/18352  | 0.1231771 | 0.4777802 | 0.4511547 | 2 | DPYS/PNP           |

|                    |            |                                                                               |        |         |           |           |           |   |                 |
|--------------------|------------|-------------------------------------------------------------------------------|--------|---------|-----------|-----------|-----------|---|-----------------|
| Molecular Function | GO:0003831 | beta-N-acetylglucosaminylglycopeptide beta-1,4-galactosyltransferase activity | 2/2321 | 5/18352 | 0.1231771 | 0.4777802 | 0.4511547 | 2 | B4GALT7/B4GALT3 |
| Molecular Function | GO:0003956 | NAD(P)+-protein-arginine ADP-ribosyltransferase activity                      | 2/2321 | 5/18352 | 0.1231771 | 0.4777802 | 0.4511547 | 2 | ART5/ART4       |
| Molecular Function | GO:0004331 | fructose-2,6-bisphosphate 2-phosphatase activity                              | 2/2321 | 5/18352 | 0.1231771 | 0.4777802 | 0.4511547 | 2 | PFKFB4/PFKFB3   |
| Molecular Function | GO:0004340 | glucokinase activity                                                          | 2/2321 | 5/18352 | 0.1231771 | 0.4777802 | 0.4511547 | 2 | HK1/HK2         |
| Molecular Function | GO:0004396 | hexokinase activity                                                           | 2/2321 | 5/18352 | 0.1231771 | 0.4777802 | 0.4511547 | 2 | HK1/HK2         |
| Molecular Function | GO:0004656 | procollagen-proline 4-dioxygenase activity                                    | 2/2321 | 5/18352 | 0.1231771 | 0.4777802 | 0.4511547 | 2 | P4HB/P4HA2      |
| Molecular Function | GO:0004720 | protein-lysine 6-oxidase activity                                             | 2/2321 | 5/18352 | 0.1231771 | 0.4777802 | 0.4511547 | 2 | LOXL3/LOXL4     |
| Molecular Function | GO:0004982 | N-formyl peptide receptor activity                                            | 2/2321 | 5/18352 | 0.1231771 | 0.4777802 | 0.4511547 | 2 | FPR2/FPR1       |
| Molecular Function | GO:0005290 | L-histidine transmembrane transporter activity                                | 2/2321 | 5/18352 | 0.1231771 | 0.4777802 | 0.4511547 | 2 | SLC15A4/SLC7A1  |

|                    |            |                                                                          |        |         |           |           |           |   |                 |
|--------------------|------------|--------------------------------------------------------------------------|--------|---------|-----------|-----------|-----------|---|-----------------|
| Molecular Function | GO:0005375 | copper ion transmembrane transporter activity                            | 2/2321 | 5/18352 | 0.1231771 | 0.4777802 | 0.4511547 | 2 | SLC11A2/ATP7B   |
| Molecular Function | GO:0008865 | fructokinase activity                                                    | 2/2321 | 5/18352 | 0.1231771 | 0.4777802 | 0.4511547 | 2 | HK1/HK2         |
| Molecular Function | GO:0009374 | biotin binding                                                           | 2/2321 | 5/18352 | 0.1231771 | 0.4777802 | 0.4511547 | 2 | PC/ACACB        |
| Molecular Function | GO:0015190 | L-leucine transmembrane transporter activity                             | 2/2321 | 5/18352 | 0.1231771 | 0.4777802 | 0.4511547 | 2 | SLC7A5/SLC7A8   |
| Molecular Function | GO:0015254 | glycerol channel activity                                                | 2/2321 | 5/18352 | 0.1231771 | 0.4777802 | 0.4511547 | 2 | AQP3/AQP9       |
| Molecular Function | GO:0016019 | peptidoglycan immune receptor activity                                   | 2/2321 | 5/18352 | 0.1231771 | 0.4777802 | 0.4511547 | 2 | PGLYRP1/PGLYRP4 |
| Molecular Function | GO:0016314 | phosphatidylinositol-3,4,5-trisphosphate 3-phosphatase activity          | 2/2321 | 5/18352 | 0.1231771 | 0.4777802 | 0.4511547 | 2 | INPP5D/INPP5E   |
| Molecular Function | GO:0016661 | oxidoreductase activity, acting on other nitrogenous compounds as donors | 2/2321 | 5/18352 | 0.1231771 | 0.4777802 | 0.4511547 | 2 | CBS/MTARC1      |
| Molecular Function | GO:0019158 | mannokinase activity                                                     | 2/2321 | 5/18352 | 0.1231771 | 0.4777802 | 0.4511547 | 2 | HK1/HK2         |

|                    |            |                                                           |        |         |           |           |           |   |                |
|--------------------|------------|-----------------------------------------------------------|--------|---------|-----------|-----------|-----------|---|----------------|
| Molecular Function | GO:0019960 | C-X3-C chemokine binding                                  | 2/2321 | 5/18352 | 0.1231771 | 0.4777802 | 0.4511547 | 2 | ITGB3/CX3CR1   |
| Molecular Function | GO:0030620 | U2 snRNA binding                                          | 2/2321 | 5/18352 | 0.1231771 | 0.4777802 | 0.4511547 | 2 | PRPF8/ISG20    |
| Molecular Function | GO:0031697 | beta-1 adrenergic receptor binding                        | 2/2321 | 5/18352 | 0.1231771 | 0.4777802 | 0.4511547 | 2 | RAPGEF2/SH3GL1 |
| Molecular Function | GO:0031826 | type 2A serotonin receptor binding                        | 2/2321 | 5/18352 | 0.1231771 | 0.4777802 | 0.4511547 | 2 | GNA11/ARRB2    |
| Molecular Function | GO:0043533 | inositol 1,3,4,5 tetrakisphosphate binding                | 2/2321 | 5/18352 | 0.1231771 | 0.4777802 | 0.4511547 | 2 | ADAP1/ASTN2    |
| Molecular Function | GO:0047035 | testosterone dehydrogenase (NAD+) activity                | 2/2321 | 5/18352 | 0.1231771 | 0.4777802 | 0.4511547 | 2 | DHRS9/HSD17B2  |
| Molecular Function | GO:0052659 | inositol-1,3,4,5-tetrakisphosphate 5-phosphatase activity | 2/2321 | 5/18352 | 0.1231771 | 0.4777802 | 0.4511547 | 2 | INPP5A/INPP5D  |
| Molecular Function | GO:0090554 | phosphatidylcholine floppase activity                     | 2/2321 | 5/18352 | 0.1231771 | 0.4777802 | 0.4511547 | 2 | ABCG1/ABCA1    |
| Molecular Function | GO:0097109 | neuroligin family protein binding                         | 2/2321 | 5/18352 | 0.1231771 | 0.4777802 | 0.4511547 | 2 | NRXN1/NRXN2    |

|                    |            |                                                               |         |           |           |           |           |    |                                                                                                                                         |
|--------------------|------------|---------------------------------------------------------------|---------|-----------|-----------|-----------|-----------|----|-----------------------------------------------------------------------------------------------------------------------------------------|
| Molecular Function | GO:1990817 | RNA adenylyltransferase activity                              | 2/2321  | 5/18352   | 0.1231771 | 0.4777802 | 0.4511547 | 2  | TENT5C/TENT5A                                                                                                                           |
| Molecular Function | GO:0015399 | primary active transmembrane transporter activity             | 18/2321 | 107/18352 | 0.1253548 | 0.4777802 | 0.4511547 | 18 | ABCC1/FXYD2/ABCG1/ATP8A1/ABCC2/ATP2B2/ATP6V1B2/RALBP1/CD320/ABCA1/ATP2A3/ABCC3/ATP6V0B/ABCB8/ABCC11/ATP7B/ATP6V0C/ATP6V1C1              |
| Molecular Function | GO:0019903 | protein phosphatase binding                                   | 24/2321 | 149/18352 | 0.1261563 | 0.4777802 | 0.4511547 | 24 | PPARG/LCK/PIK3R1/TRAF2/CSF1R/JUP/SNX3/SMG7/AKAP5/PXN/JAK1/FER/STRN4/CSK/KCNQ1/BCL2/KIFAP3/ANAPC7/FOXO1/PPP1R16B/PDLIM4/CD33/ANKLE2/PTPA |
| Molecular Function | GO:0000121 | glycerol-1-phosphatase activity                               | 1/2321  | 1/18352   | 0.1264712 | 0.4777802 | 0.4511547 | 1  | PGP                                                                                                                                     |
| Molecular Function | GO:0000225 | N-acetylglucosaminylphosphatidylinositol deacetylase activity | 1/2321  | 1/18352   | 0.1264712 | 0.4777802 | 0.4511547 | 1  | PIGL                                                                                                                                    |
| Molecular Function | GO:0000257 | nitrilase activity                                            | 1/2321  | 1/18352   | 0.1264712 | 0.4777802 | 0.4511547 | 1  | NIT1                                                                                                                                    |
| Molecular Function | GO:0001596 | angiotensin type I receptor activity                          | 1/2321  | 1/18352   | 0.1264712 | 0.4777802 | 0.4511547 | 1  | AGTR1                                                                                                                                   |
| Molecular Function | GO:0001850 | complement component C3a binding                              | 1/2321  | 1/18352   | 0.1264712 | 0.4777802 | 0.4511547 | 1  | PHB                                                                                                                                     |
| Molecular Function | GO:0002059 | thymine binding                                               | 1/2321  | 1/18352   | 0.1264712 | 0.4777802 | 0.4511547 | 1  | DPYS                                                                                                                                    |

|                    |            |                                                                                           |        |         |           |           |           |   |         |
|--------------------|------------|-------------------------------------------------------------------------------------------|--------|---------|-----------|-----------|-----------|---|---------|
| Molecular Function | GO:0003830 | beta-1,4-mannosylglycoprotein 4-beta-N-acetylglucosaminyltransferase activity             | 1/2321 | 1/18352 | 0.1264712 | 0.4777802 | 0.4511547 | 1 | MGAT3   |
| Molecular Function | GO:0003837 | beta-ureidopropionase activity                                                            | 1/2321 | 1/18352 | 0.1264712 | 0.4777802 | 0.4511547 | 1 | UPB1    |
| Molecular Function | GO:0003842 | 1-pyrroline-5-carboxylate dehydrogenase activity                                          | 1/2321 | 1/18352 | 0.1264712 | 0.4777802 | 0.4511547 | 1 | ALDH4A1 |
| Molecular Function | GO:0003882 | CDP-diacylglycerol-serine O-phosphatidyltransferase activity                              | 1/2321 | 1/18352 | 0.1264712 | 0.4777802 | 0.4511547 | 1 | PTDSS2  |
| Molecular Function | GO:0003975 | UDP-N-acetylglucosamine-dolichyl-phosphate N-acetylglucosaminephosphotransferase activity | 1/2321 | 1/18352 | 0.1264712 | 0.4777802 | 0.4511547 | 1 | DPAGT1  |
| Molecular Function | GO:0004058 | aromatic-L-amino-acid decarboxylase activity                                              | 1/2321 | 1/18352 | 0.1264712 | 0.4777802 | 0.4511547 | 1 | DDC     |
| Molecular Function | GO:0004132 | dCMP deaminase activity                                                                   | 1/2321 | 1/18352 | 0.1264712 | 0.4777802 | 0.4511547 | 1 | DCTD    |
| Molecular Function | GO:0004152 | dihydroorotate dehydrogenase activity                                                     | 1/2321 | 1/18352 | 0.1264712 | 0.4777802 | 0.4511547 | 1 | DHODH   |
| Molecular Function | GO:0004157 | dihydropyrimidinase activity                                                              | 1/2321 | 1/18352 | 0.1264712 | 0.4777802 | 0.4511547 | 1 | DPYS    |



|                    |            |                                                                   |        |         |           |           |           |   |       |
|--------------------|------------|-------------------------------------------------------------------|--------|---------|-----------|-----------|-----------|---|-------|
| Molecular Function | GO:0004325 | ferrochelatase activity                                           | 1/2321 | 1/18352 | 0.1264712 | 0.4777802 | 0.4511547 | 1 | FECH  |
| Molecular Function | GO:0004334 | fumarylacetoacetase activity                                      | 1/2321 | 1/18352 | 0.1264712 | 0.4777802 | 0.4511547 | 1 | FAH   |
| Molecular Function | GO:0004339 | glucan 1,4-alpha-glucosidase activity                             | 1/2321 | 1/18352 | 0.1264712 | 0.4777802 | 0.4511547 | 1 | MGAM  |
| Molecular Function | GO:0004377 | GDP-Man:Man3GlcNAc2-PP-Dol alpha-1,2-mannosyltransferase activity | 1/2321 | 1/18352 | 0.1264712 | 0.4777802 | 0.4511547 | 1 | ALG11 |
| Molecular Function | GO:0004397 | histidine ammonia-lyase activity                                  | 1/2321 | 1/18352 | 0.1264712 | 0.4777802 | 0.4511547 | 1 | HAL   |
| Molecular Function | GO:0004411 | homogentisate 1,2-dioxygenase activity                            | 1/2321 | 1/18352 | 0.1264712 | 0.4777802 | 0.4511547 | 1 | HGD   |
| Molecular Function | GO:0004597 | peptide-aspartate beta-dioxygenase activity                       | 1/2321 | 1/18352 | 0.1264712 | 0.4777802 | 0.4511547 | 1 | ASPH  |
| Molecular Function | GO:0004621 | glycosylphosphatidylinositol phospholipase D activity             | 1/2321 | 1/18352 | 0.1264712 | 0.4777802 | 0.4511547 | 1 | GPLD1 |
| Molecular Function | GO:0004633 | phosphopantothenoylcysteine decarboxylase activity                | 1/2321 | 1/18352 | 0.1264712 | 0.4777802 | 0.4511547 | 1 | PPCDC |

|                    |            |                                                                          |        |         |           |           |           |   |         |
|--------------------|------------|--------------------------------------------------------------------------|--------|---------|-----------|-----------|-----------|---|---------|
| Molecular Function | GO:0004729 | oxygen-dependent<br>protoporphyrinogen oxidase<br>activity               | 1/2321 | 1/18352 | 0.1264712 | 0.4777802 | 0.4511547 | 1 | PPOX    |
| Molecular Function | GO:0004736 | pyruvate carboxylase activity                                            | 1/2321 | 1/18352 | 0.1264712 | 0.4777802 | 0.4511547 | 1 | PC      |
| Molecular Function | GO:0004760 | serine-pyruvate<br>transaminase activity                                 | 1/2321 | 1/18352 | 0.1264712 | 0.4777802 | 0.4511547 | 1 | AGXT    |
| Molecular Function | GO:0004876 | complement component C3a<br>receptor activity                            | 1/2321 | 1/18352 | 0.1264712 | 0.4777802 | 0.4511547 | 1 | C3AR1   |
| Molecular Function | GO:0005130 | granulocyte colony-<br>stimulating factor receptor<br>binding            | 1/2321 | 1/18352 | 0.1264712 | 0.4777802 | 0.4511547 | 1 | CSF3    |
| Molecular Function | GO:0005141 | interleukin-10 receptor<br>binding                                       | 1/2321 | 1/18352 | 0.1264712 | 0.4777802 | 0.4511547 | 1 | IL10    |
| Molecular Function | GO:0005166 | neurotrophin p75 receptor<br>binding                                     | 1/2321 | 1/18352 | 0.1264712 | 0.4777802 | 0.4511547 | 1 | NTRK1   |
| Molecular Function | GO:0005175 | CD27 receptor binding                                                    | 1/2321 | 1/18352 | 0.1264712 | 0.4777802 | 0.4511547 | 1 | SIVA1   |
| Molecular Function | GO:0005371 | tricarboxylate secondary<br>active transmembrane<br>transporter activity | 1/2321 | 1/18352 | 0.1264712 | 0.4777802 | 0.4511547 | 1 | SLC25A1 |

|                    |            |                                                                            |        |         |           |           |           |   |         |
|--------------------|------------|----------------------------------------------------------------------------|--------|---------|-----------|-----------|-----------|---|---------|
| Molecular Function | GO:0008111 | alpha-methylacyl-CoA racemase activity                                     | 1/2321 | 1/18352 | 0.1264712 | 0.4777802 | 0.4511547 | 1 | AMACR   |
| Molecular Function | GO:0008119 | thiopurine S-methyltransferase activity                                    | 1/2321 | 1/18352 | 0.1264712 | 0.4777802 | 0.4511547 | 1 | TPMT    |
| Molecular Function | GO:0008442 | 3-hydroxyisobutyrate dehydrogenase activity                                | 1/2321 | 1/18352 | 0.1264712 | 0.4777802 | 0.4511547 | 1 | HIBADH  |
| Molecular Function | GO:0008444 | CDP-diacylglycerol-glycerol-3-phosphate 3-phosphatidyltransferase activity | 1/2321 | 1/18352 | 0.1264712 | 0.4777802 | 0.4511547 | 1 | PGS1    |
| Molecular Function | GO:0008448 | N-acetylglucosamine-6-phosphate deacetylase activity                       | 1/2321 | 1/18352 | 0.1264712 | 0.4777802 | 0.4511547 | 1 | AMDHD2  |
| Molecular Function | GO:0008478 | pyridoxal kinase activity                                                  | 1/2321 | 1/18352 | 0.1264712 | 0.4777802 | 0.4511547 | 1 | PDXK    |
| Molecular Function | GO:0008493 | tetracycline transmembrane transporter activity                            | 1/2321 | 1/18352 | 0.1264712 | 0.4777802 | 0.4511547 | 1 | MFSD10  |
| Molecular Function | GO:0008518 | folate:anion antiporter activity                                           | 1/2321 | 1/18352 | 0.1264712 | 0.4777802 | 0.4511547 | 1 | SLC19A1 |
| Molecular Function | GO:0008521 | acetyl-CoA transmembrane transporter activity                              | 1/2321 | 1/18352 | 0.1264712 | 0.4777802 | 0.4511547 | 1 | SLC33A1 |

|                    |            |                                                            |        |         |           |           |           |   |            |
|--------------------|------------|------------------------------------------------------------|--------|---------|-----------|-----------|-----------|---|------------|
| Molecular Function | GO:0008700 | 4-hydroxy-2-oxoglutarate aldolase activity                 | 1/2321 | 1/18352 | 0.1264712 | 0.4777802 | 0.4511547 | 1 | HOGA1      |
| Molecular Function | GO:0008747 | N-acetylneuraminate lyase activity                         | 1/2321 | 1/18352 | 0.1264712 | 0.4777802 | 0.4511547 | 1 | NPL        |
| Molecular Function | GO:0008794 | arsenate reductase (glutaredoxin) activity                 | 1/2321 | 1/18352 | 0.1264712 | 0.4777802 | 0.4511547 | 1 | GLRX2      |
| Molecular Function | GO:0008843 | endochitinase activity                                     | 1/2321 | 1/18352 | 0.1264712 | 0.4777802 | 0.4511547 | 1 | CHIT1      |
| Molecular Function | GO:0008859 | exoribonuclease II activity                                | 1/2321 | 1/18352 | 0.1264712 | 0.4777802 | 0.4511547 | 1 | ISG20      |
| Molecular Function | GO:0008887 | glycerate kinase activity                                  | 1/2321 | 1/18352 | 0.1264712 | 0.4777802 | 0.4511547 | 1 | GLYCK      |
| Molecular Function | GO:0008941 | nitric oxide dioxygenase activity                          | 1/2321 | 1/18352 | 0.1264712 | 0.4777802 | 0.4511547 | 1 | POR        |
| Molecular Function | GO:0008955 | peptidoglycan glycosyltransferase activity                 | 1/2321 | 1/18352 | 0.1264712 | 0.4777802 | 0.4511547 | 1 | CSGALNACT1 |
| Molecular Function | GO:0008963 | phospho-N-acetylmuramoyl-pentapeptide-transferase activity | 1/2321 | 1/18352 | 0.1264712 | 0.4777802 | 0.4511547 | 1 | DPAGT1     |

|                    |            |                                                                           |        |         |           |           |           |   |         |
|--------------------|------------|---------------------------------------------------------------------------|--------|---------|-----------|-----------|-----------|---|---------|
| Molecular Function | GO:0009000 | selenocysteine lyase activity                                             | 1/2321 | 1/18352 | 0.1264712 | 0.4777802 | 0.4511547 | 1 | SCLY    |
| Molecular Function | GO:0010309 | acireductone dioxygenase [iron(II)-requiring] activity                    | 1/2321 | 1/18352 | 0.1264712 | 0.4777802 | 0.4511547 | 1 | ADI1    |
| Molecular Function | GO:0010428 | methyl-CpNpG binding                                                      | 1/2321 | 1/18352 | 0.1264712 | 0.4777802 | 0.4511547 | 1 | ZBTB4   |
| Molecular Function | GO:0015094 | lead ion transmembrane transporter activity                               | 1/2321 | 1/18352 | 0.1264712 | 0.4777802 | 0.4511547 | 1 | SLC11A2 |
| Molecular Function | GO:0015099 | nickel cation transmembrane transporter activity                          | 1/2321 | 1/18352 | 0.1264712 | 0.4777802 | 0.4511547 | 1 | SLC11A2 |
| Molecular Function | GO:0015127 | bilirubin transmembrane transporter activity                              | 1/2321 | 1/18352 | 0.1264712 | 0.4777802 | 0.4511547 | 1 | ABCC2   |
| Molecular Function | GO:0015130 | mevalonate transmembrane transporter activity                             | 1/2321 | 1/18352 | 0.1264712 | 0.4777802 | 0.4511547 | 1 | SLC16A1 |
| Molecular Function | GO:0015431 | ATPase-coupled glutathione S-conjugate transmembrane transporter activity | 1/2321 | 1/18352 | 0.1264712 | 0.4777802 | 0.4511547 | 1 | ABCC1   |
| Molecular Function | GO:0016151 | nickel cation binding                                                     | 1/2321 | 1/18352 | 0.1264712 | 0.4777802 | 0.4511547 | 1 | CA3     |

|                    |            |                                                                                                                                                                                      |        |         |           |           |           |   |        |
|--------------------|------------|--------------------------------------------------------------------------------------------------------------------------------------------------------------------------------------|--------|---------|-----------|-----------|-----------|---|--------|
| Molecular Function | GO:0016495 | C-X3-C chemokine receptor activity                                                                                                                                                   | 1/2321 | 1/18352 | 0.1264712 | 0.4777802 | 0.4511547 | 1 | CX3CR1 |
| Molecular Function | GO:0016519 | gastric inhibitory peptide receptor activity                                                                                                                                         | 1/2321 | 1/18352 | 0.1264712 | 0.4777802 | 0.4511547 | 1 | GIPR   |
| Molecular Function | GO:0016662 | oxidoreductase activity, acting on other nitrogenous compounds as donors, cytochrome as acceptor                                                                                     | 1/2321 | 1/18352 | 0.1264712 | 0.4777802 | 0.4511547 | 1 | CBS    |
| Molecular Function | GO:0016708 | oxidoreductase activity, acting on paired donors, with incorporation or reduction of molecular oxygen, NAD(P)H as one donor, and incorporation of two atoms of oxygen into one donor | 1/2321 | 1/18352 | 0.1264712 | 0.4777802 | 0.4511547 | 1 | POR    |
| Molecular Function | GO:0016815 | hydrolase activity, acting on carbon-nitrogen (but not peptide) bonds, in nitriles                                                                                                   | 1/2321 | 1/18352 | 0.1264712 | 0.4777802 | 0.4511547 | 1 | NIT1   |
| Molecular Function | GO:0016843 | amine-lyase activity                                                                                                                                                                 | 1/2321 | 1/18352 | 0.1264712 | 0.4777802 | 0.4511547 | 1 | APMAP  |
| Molecular Function | GO:0016844 | strictosidine synthase activity                                                                                                                                                      | 1/2321 | 1/18352 | 0.1264712 | 0.4777802 | 0.4511547 | 1 | APMAP  |
| Molecular Function | GO:0017005 | 3'-tyrosyl-DNA phosphodiesterase activity                                                                                                                                            | 1/2321 | 1/18352 | 0.1264712 | 0.4777802 | 0.4511547 | 1 | TDP1   |
| Molecular Function | GO:0030108 | HLA-A specific activating MHC class I receptor activity                                                                                                                              | 1/2321 | 1/18352 | 0.1264712 | 0.4777802 | 0.4511547 | 1 | CTSH   |

|                    |            |                                                      |        |         |           |           |           |   |       |
|--------------------|------------|------------------------------------------------------|--------|---------|-----------|-----------|-----------|---|-------|
| Molecular Function | GO:0030184 | nitric oxide transmembrane transporter activity      | 1/2321 | 1/18352 | 0.1264712 | 0.4777802 | 0.4511547 | 1 | AQP1  |
| Molecular Function | GO:0030272 | 5-formyltetrahydrofolate cyclo-ligase activity       | 1/2321 | 1/18352 | 0.1264712 | 0.4777802 | 0.4511547 | 1 | MTHFS |
| Molecular Function | GO:0030379 | neurotensin receptor activity, non-G protein-coupled | 1/2321 | 1/18352 | 0.1264712 | 0.4777802 | 0.4511547 | 1 | SORT1 |
| Molecular Function | GO:0030387 | fructosamine-3-kinase activity                       | 1/2321 | 1/18352 | 0.1264712 | 0.4777802 | 0.4511547 | 1 | FN3K  |
| Molecular Function | GO:0030611 | arsenate reductase activity                          | 1/2321 | 1/18352 | 0.1264712 | 0.4777802 | 0.4511547 | 1 | GLRX2 |
| Molecular Function | GO:0031768 | ghrelin receptor binding                             | 1/2321 | 1/18352 | 0.1264712 | 0.4777802 | 0.4511547 | 1 | GHRL  |
| Molecular Function | GO:0031798 | type 1 metabotropic glutamate receptor binding       | 1/2321 | 1/18352 | 0.1264712 | 0.4777802 | 0.4511547 | 1 | DNM3  |
| Molecular Function | GO:0031859 | platelet activating factor receptor binding          | 1/2321 | 1/18352 | 0.1264712 | 0.4777802 | 0.4511547 | 1 | ARRB2 |
| Molecular Function | GO:0031896 | V2 vasopressin receptor binding                      | 1/2321 | 1/18352 | 0.1264712 | 0.4777802 | 0.4511547 | 1 | ARRB1 |

|                    |            |                                                                                 |        |         |           |           |           |   |        |
|--------------------|------------|---------------------------------------------------------------------------------|--------|---------|-----------|-----------|-----------|---|--------|
| Molecular Function | GO:0031962 | mineralocorticoid receptor binding                                              | 1/2321 | 1/18352 | 0.1264712 | 0.4777802 | 0.4511547 | 1 | SMAD3  |
| Molecular Function | GO:0032500 | muramyl dipeptide binding                                                       | 1/2321 | 1/18352 | 0.1264712 | 0.4777802 | 0.4511547 | 1 | NOD2   |
| Molecular Function | GO:0032896 | palmitoyl-CoA 9-desaturase activity                                             | 1/2321 | 1/18352 | 0.1264712 | 0.4777802 | 0.4511547 | 1 | SCD    |
| Molecular Function | GO:0033744 | L-methionine:thioredoxin-disulfide S-oxidoreductase activity                    | 1/2321 | 1/18352 | 0.1264712 | 0.4777802 | 0.4511547 | 1 | MSRA   |
| Molecular Function | GO:0033791 | 3alpha,7alpha,12alpha-trihydroxy-5beta-cholestanoyl-CoA 24-hydroxylase activity | 1/2321 | 1/18352 | 0.1264712 | 0.4777802 | 0.4511547 | 1 | ACOX2  |
| Molecular Function | GO:0033961 | cis-stilbene-oxide hydrolase activity                                           | 1/2321 | 1/18352 | 0.1264712 | 0.4777802 | 0.4511547 | 1 | EPHX1  |
| Molecular Function | GO:0034041 | ATPase-coupled sterol transmembrane transporter activity                        | 1/2321 | 1/18352 | 0.1264712 | 0.4777802 | 0.4511547 | 1 | ABCG1  |
| Molecular Function | GO:0034649 | histone demethylase activity (H3-monomethyl-K4 specific)                        | 1/2321 | 1/18352 | 0.1264712 | 0.4777802 | 0.4511547 | 1 | KDM1B  |
| Molecular Function | GO:0035438 | cyclic-di-GMP binding                                                           | 1/2321 | 1/18352 | 0.1264712 | 0.4777802 | 0.4511547 | 1 | STING1 |



|                    |            |                                                           |        |         |           |           |           |   |        |
|--------------------|------------|-----------------------------------------------------------|--------|---------|-----------|-----------|-----------|---|--------|
| Molecular Function | GO:0035485 | adenine/guanine mispair binding                           | 1/2321 | 1/18352 | 0.1264712 | 0.4777802 | 0.4511547 | 1 | MUTYH  |
| Molecular Function | GO:0035598 | N6-threonylcarbonyladenine methylthiotransferase activity | 1/2321 | 1/18352 | 0.1264712 | 0.4777802 | 0.4511547 | 1 | CDKAL1 |
| Molecular Function | GO:0035715 | chemokine (C-C motif) ligand 2 binding                    | 1/2321 | 1/18352 | 0.1264712 | 0.4777802 | 0.4511547 | 1 | CCR2   |
| Molecular Function | GO:0035716 | chemokine (C-C motif) ligand 12 binding                   | 1/2321 | 1/18352 | 0.1264712 | 0.4777802 | 0.4511547 | 1 | CCR2   |
| Molecular Function | GO:0036004 | GAF domain binding                                        | 1/2321 | 1/18352 | 0.1264712 | 0.4777802 | 0.4511547 | 1 | AIP    |
| Molecular Function | GO:0036326 | VEGF-A-activated receptor activity                        | 1/2321 | 1/18352 | 0.1264712 | 0.4777802 | 0.4511547 | 1 | FLT1   |
| Molecular Function | GO:0036327 | VEGF-B-activated receptor activity                        | 1/2321 | 1/18352 | 0.1264712 | 0.4777802 | 0.4511547 | 1 | FLT1   |
| Molecular Function | GO:0036332 | placental growth factor-activated receptor activity       | 1/2321 | 1/18352 | 0.1264712 | 0.4777802 | 0.4511547 | 1 | FLT1   |
| Molecular Function | GO:0036393 | thiocyanate peroxidase activity                           | 1/2321 | 1/18352 | 0.1264712 | 0.4777802 | 0.4511547 | 1 | LPO    |

|                    |            |                                             |        |         |           |           |           |   |        |
|--------------------|------------|---------------------------------------------|--------|---------|-----------|-----------|-----------|---|--------|
| Molecular Function | GO:0036456 | L-methionine-(S)-S-oxide reductase activity | 1/2321 | 1/18352 | 0.1264712 | 0.4777802 | 0.4511547 | 1 | MSRA   |
| Molecular Function | GO:0036468 | L-dopa decarboxylase activity               | 1/2321 | 1/18352 | 0.1264712 | 0.4777802 | 0.4511547 | 1 | DDC    |
| Molecular Function | GO:0038186 | lithocholic acid receptor activity          | 1/2321 | 1/18352 | 0.1264712 | 0.4777802 | 0.4511547 | 1 | VDR    |
| Molecular Function | GO:0042131 | thiamine phosphate phosphatase activity     | 1/2321 | 1/18352 | 0.1264712 | 0.4777802 | 0.4511547 | 1 | ACP3   |
| Molecular Function | GO:0042586 | peptide deformylase activity                | 1/2321 | 1/18352 | 0.1264712 | 0.4777802 | 0.4511547 | 1 | PDF    |
| Molecular Function | GO:0042945 | D-serine transmembrane transporter activity | 1/2321 | 1/18352 | 0.1264712 | 0.4777802 | 0.4511547 | 1 | SFXN1  |
| Molecular Function | GO:0043843 | ADP-specific glucokinase activity           | 1/2321 | 1/18352 | 0.1264712 | 0.4777802 | 0.4511547 | 1 | ADPGK  |
| Molecular Function | GO:0043890 | N-acetylgalactosamine-6-sulfatase activity  | 1/2321 | 1/18352 | 0.1264712 | 0.4777802 | 0.4511547 | 1 | GALNS  |
| Molecular Function | GO:0043914 | NADPH:sulfur oxidoreductase activity        | 1/2321 | 1/18352 | 0.1264712 | 0.4777802 | 0.4511547 | 1 | MICAL2 |

|                    |            |                                                            |        |         |           |           |           |   |         |
|--------------------|------------|------------------------------------------------------------|--------|---------|-----------|-----------|-----------|---|---------|
| Molecular Function | GO:0045127 | N-acetylglucosamine kinase activity                        | 1/2321 | 1/18352 | 0.1264712 | 0.4777802 | 0.4511547 | 1 | NAGK    |
| Molecular Function | GO:0045352 | interleukin-1 type I receptor antagonist activity          | 1/2321 | 1/18352 | 0.1264712 | 0.4777802 | 0.4511547 | 1 | IL1RN   |
| Molecular Function | GO:0045353 | interleukin-1 type II receptor antagonist activity         | 1/2321 | 1/18352 | 0.1264712 | 0.4777802 | 0.4511547 | 1 | IL1RN   |
| Molecular Function | GO:0046525 | xylosylprotein 4-beta-galactosyltransferase activity       | 1/2321 | 1/18352 | 0.1264712 | 0.4777802 | 0.4511547 | 1 | B4GALT7 |
| Molecular Function | GO:0046539 | histamine N-methyltransferase activity                     | 1/2321 | 1/18352 | 0.1264712 | 0.4777802 | 0.4511547 | 1 | HNMT    |
| Molecular Function | GO:0046817 | chemokine receptor antagonist activity                     | 1/2321 | 1/18352 | 0.1264712 | 0.4777802 | 0.4511547 | 1 | CCL5    |
| Molecular Function | GO:0047127 | thiomorpholine-carboxylate dehydrogenase activity          | 1/2321 | 1/18352 | 0.1264712 | 0.4777802 | 0.4511547 | 1 | CRYM    |
| Molecular Function | GO:0047186 | N-acetylneuraminate 7-O(or 9-O)-acetyltransferase activity | 1/2321 | 1/18352 | 0.1264712 | 0.4777802 | 0.4511547 | 1 | CASD1   |
| Molecular Function | GO:0047191 | 1-alkylglycerophosphocholine O-acyltransferase activity    | 1/2321 | 1/18352 | 0.1264712 | 0.4777802 | 0.4511547 | 1 | LPCAT1  |

|                    |            |                                                                       |        |         |           |           |           |   |        |
|--------------------|------------|-----------------------------------------------------------------------|--------|---------|-----------|-----------|-----------|---|--------|
| Molecular Function | GO:0047256 | lactosylceramide 1,3-N-acetyl-beta-D-glucosaminyltransferase activity | 1/2321 | 1/18352 | 0.1264712 | 0.4777802 | 0.4511547 | 1 | B3GNT5 |
| Molecular Function | GO:0047419 | N-acetylgalactosamine-6-phosphate deacetylase activity                | 1/2321 | 1/18352 | 0.1264712 | 0.4777802 | 0.4511547 | 1 | AMDHD2 |
| Molecular Function | GO:0047726 | iron-cytochrome-c reductase activity                                  | 1/2321 | 1/18352 | 0.1264712 | 0.4777802 | 0.4511547 | 1 | POR    |
| Molecular Function | GO:0047800 | cysteamine dioxygenase activity                                       | 1/2321 | 1/18352 | 0.1264712 | 0.4777802 | 0.4511547 | 1 | ADO    |
| Molecular Function | GO:0047820 | D-glutamate cyclase activity                                          | 1/2321 | 1/18352 | 0.1264712 | 0.4777802 | 0.4511547 | 1 | DGLUCY |
| Molecular Function | GO:0048040 | UDP-glucuronate decarboxylase activity                                | 1/2321 | 1/18352 | 0.1264712 | 0.4777802 | 0.4511547 | 1 | UXS1   |
| Molecular Function | GO:0050023 | L-fuconate dehydratase activity                                       | 1/2321 | 1/18352 | 0.1264712 | 0.4777802 | 0.4511547 | 1 | ENOSF1 |
| Molecular Function | GO:0050115 | myosin-light-chain-phosphatase activity                               | 1/2321 | 1/18352 | 0.1264712 | 0.4777802 | 0.4511547 | 1 | PPP1CB |
| Molecular Function | GO:0050207 | plasmalethanolamine desaturase activity                               | 1/2321 | 1/18352 | 0.1264712 | 0.4777802 | 0.4511547 | 1 | PEDS1  |

|                    |            |                                                                          |        |         |           |           |           |   |         |
|--------------------|------------|--------------------------------------------------------------------------|--------|---------|-----------|-----------|-----------|---|---------|
| Molecular Function | GO:0050421 | nitrite reductase (NO-forming) activity                                  | 1/2321 | 1/18352 | 0.1264712 | 0.4777802 | 0.4511547 | 1 | CBS     |
| Molecular Function | GO:0050528 | acyloxyacyl hydrolase activity                                           | 1/2321 | 1/18352 | 0.1264712 | 0.4777802 | 0.4511547 | 1 | AOAH    |
| Molecular Function | GO:0050561 | glutamate-tRNA(Gln) ligase activity                                      | 1/2321 | 1/18352 | 0.1264712 | 0.4777802 | 0.4511547 | 1 | EARS2   |
| Molecular Function | GO:0051433 | BH2 domain binding                                                       | 1/2321 | 1/18352 | 0.1264712 | 0.4777802 | 0.4511547 | 1 | DNM1L   |
| Molecular Function | GO:0051978 | lysophospholipid:sodium symporter activity                               | 1/2321 | 1/18352 | 0.1264712 | 0.4777802 | 0.4511547 | 1 | MFSD2A  |
| Molecular Function | GO:0051990 | (R)-2-hydroxyglutarate dehydrogenase activity                            | 1/2321 | 1/18352 | 0.1264712 | 0.4777802 | 0.4511547 | 1 | D2HGDH  |
| Molecular Function | GO:0061712 | tRNA (N(6)-L-threonylcarbamoyladenosine (37)-C(2))-methylthiotransferase | 1/2321 | 1/18352 | 0.1264712 | 0.4777802 | 0.4511547 | 1 | CDKAL1  |
| Molecular Function | GO:0061768 | magnesium:sodium antiporter activity                                     | 1/2321 | 1/18352 | 0.1264712 | 0.4777802 | 0.4511547 | 1 | SLC41A1 |
| Molecular Function | GO:0061797 | pH-gated chloride channel activity                                       | 1/2321 | 1/18352 | 0.1264712 | 0.4777802 | 0.4511547 | 1 | PACC1   |

|                    |            |                                                                                                       |        |         |           |           |           |   |         |
|--------------------|------------|-------------------------------------------------------------------------------------------------------|--------|---------|-----------|-----------|-----------|---|---------|
| Molecular Function | GO:0070025 | carbon monoxide binding                                                                               | 1/2321 | 1/18352 | 0.1264712 | 0.4777802 | 0.4511547 | 1 | CBS     |
| Molecular Function | GO:0070119 | ciliary neurotrophic factor binding                                                                   | 1/2321 | 1/18352 | 0.1264712 | 0.4777802 | 0.4511547 | 1 | IL6R    |
| Molecular Function | GO:0070191 | methionine-R-sulfoxide reductase activity                                                             | 1/2321 | 1/18352 | 0.1264712 | 0.4777802 | 0.4511547 | 1 | MSRB1   |
| Molecular Function | GO:0070551 | endoribonuclease activity, cleaving siRNA-paired mRNA                                                 | 1/2321 | 1/18352 | 0.1264712 | 0.4777802 | 0.4511547 | 1 | AGO2    |
| Molecular Function | GO:0070818 | protoporphyrinogen oxidase activity                                                                   | 1/2321 | 1/18352 | 0.1264712 | 0.4777802 | 0.4511547 | 1 | PPOX    |
| Molecular Function | GO:0071913 | citrate secondary active transmembrane transporter activity                                           | 1/2321 | 1/18352 | 0.1264712 | 0.4777802 | 0.4511547 | 1 | SLC25A1 |
| Molecular Function | GO:0072571 | mono-ADP-D-ribose binding                                                                             | 1/2321 | 1/18352 | 0.1264712 | 0.4777802 | 0.4511547 | 1 | TRPM2   |
| Molecular Function | GO:0080132 | fatty acid alpha-hydroxylase activity                                                                 | 1/2321 | 1/18352 | 0.1264712 | 0.4777802 | 0.4511547 | 1 | FA2H    |
| Molecular Function | GO:0086076 | gap junction channel activity involved in atrial cardiac muscle cell-AV node cell electrical coupling | 1/2321 | 1/18352 | 0.1264712 | 0.4777802 | 0.4511547 | 1 | GJA5    |

|                    |            |                                                                                                                |        |         |           |           |           |   |        |
|--------------------|------------|----------------------------------------------------------------------------------------------------------------|--------|---------|-----------|-----------|-----------|---|--------|
| Molecular Function | GO:0086078 | gap junction channel activity involved in bundle of His cell-Purkinje myocyte electrical coupling              | 1/2321 | 1/18352 | 0.1264712 | 0.4777802 | 0.4511547 | 1 | GJA5   |
| Molecular Function | GO:0086079 | gap junction channel activity involved in Purkinje myocyte-ventricular cardiac muscle cell electrical coupling | 1/2321 | 1/18352 | 0.1264712 | 0.4777802 | 0.4511547 | 1 | GJA5   |
| Molecular Function | GO:0090409 | malonyl-CoA synthetase activity                                                                                | 1/2321 | 1/18352 | 0.1264712 | 0.4777802 | 0.4511547 | 1 | ACSF3  |
| Molecular Function | GO:0097020 | COPII adaptor activity                                                                                         | 1/2321 | 1/18352 | 0.1264712 | 0.4777802 | 0.4511547 | 1 | TEX261 |
| Molecular Function | GO:0097726 | LEM domain binding                                                                                             | 1/2321 | 1/18352 | 0.1264712 | 0.4777802 | 0.4511547 | 1 | BANF1  |
| Molecular Function | GO:0098695 | inositol 1,4,5-trisphosphate receptor activity involved in regulation of postsynaptic cytosolic calcium levels | 1/2321 | 1/18352 | 0.1264712 | 0.4777802 | 0.4511547 | 1 | ITPR1  |
| Molecular Function | GO:0098809 | nitrite reductase activity                                                                                     | 1/2321 | 1/18352 | 0.1264712 | 0.4777802 | 0.4511547 | 1 | CBS    |
| Molecular Function | GO:0102008 | cytosolic dipeptidase activity                                                                                 | 1/2321 | 1/18352 | 0.1264712 | 0.4777802 | 0.4511547 | 1 | CNDP2  |
| Molecular Function | GO:0102194 | protein-fructosamine 3-kinase activity                                                                         | 1/2321 | 1/18352 | 0.1264712 | 0.4777802 | 0.4511547 | 1 | FN3K   |

|                    |            |                                                     |        |         |           |           |           |   |         |
|--------------------|------------|-----------------------------------------------------|--------|---------|-----------|-----------|-----------|---|---------|
| Molecular Function | GO:0102264 | tRNA-dihydrouridine20<br>synthase activity          | 1/2321 | 1/18352 | 0.1264712 | 0.4777802 | 0.4511547 | 1 | DUS2    |
| Molecular Function | GO:0102797 | geranial:oxygen<br>oxidoreductase activity          | 1/2321 | 1/18352 | 0.1264712 | 0.4777802 | 0.4511547 | 1 | AOX1    |
| Molecular Function | GO:0102798 | heptaldehyde:oxygen<br>oxidoreductase activity      | 1/2321 | 1/18352 | 0.1264712 | 0.4777802 | 0.4511547 | 1 | AOX1    |
| Molecular Function | GO:0103046 | alanylglutamate dipeptidase<br>activity             | 1/2321 | 1/18352 | 0.1264712 | 0.4777802 | 0.4511547 | 1 | CNDP2   |
| Molecular Function | GO:0120019 | phosphatidylcholine transfer<br>activity            | 1/2321 | 1/18352 | 0.1264712 | 0.4777802 | 0.4511547 | 1 | PLTP    |
| Molecular Function | GO:0120092 | crotonyl-CoA hydratase<br>activity                  | 1/2321 | 1/18352 | 0.1264712 | 0.4777802 | 0.4511547 | 1 | CDYL    |
| Molecular Function | GO:1901235 | (R)-carnitine transmembrane<br>transporter activity | 1/2321 | 1/18352 | 0.1264712 | 0.4777802 | 0.4511547 | 1 | SLC22A5 |
| Molecular Function | GO:1901480 | oleate transmembrane<br>transporter activity        | 1/2321 | 1/18352 | 0.1264712 | 0.4777802 | 0.4511547 | 1 | MFSD2A  |
| Molecular Function | GO:1902098 | calcitriol binding                                  | 1/2321 | 1/18352 | 0.1264712 | 0.4777802 | 0.4511547 | 1 | VDR     |



|                    |            |                                                                                                                 |        |          |           |           |           |   |                                                    |
|--------------------|------------|-----------------------------------------------------------------------------------------------------------------|--------|----------|-----------|-----------|-----------|---|----------------------------------------------------|
| Molecular Function | GO:1902121 | lithocholic acid binding                                                                                        | 1/2321 | 1/18352  | 0.1264712 | 0.4777802 | 0.4511547 | 1 | VDR                                                |
| Molecular Function | GO:1904121 | phosphatidylethanolamine transfer activity                                                                      | 1/2321 | 1/18352  | 0.1264712 | 0.4777802 | 0.4511547 | 1 | PLTP                                               |
| Molecular Function | GO:1905059 | calcium-transporting ATPase activity involved in regulation of postsynaptic cytosolic calcium ion concentration | 1/2321 | 1/18352  | 0.1264712 | 0.4777802 | 0.4511547 | 1 | ATP2B2                                             |
| Molecular Function | GO:1990175 | EH domain binding                                                                                               | 1/2321 | 1/18352  | 0.1264712 | 0.4777802 | 0.4511547 | 1 | EPN3                                               |
| Molecular Function | GO:1990188 | euchromatin binding                                                                                             | 1/2321 | 1/18352  | 0.1264712 | 0.4777802 | 0.4511547 | 1 | ASH2L                                              |
| Molecular Function | GO:0015175 | neutral amino acid transmembrane transporter activity                                                           | 7/2321 | 34/18352 | 0.1298701 | 0.4838955 | 0.4569292 | 7 | SLC1A5/SLC43A2/SLC7A5/SFXN1/SLC36A3/SLC43A1/SLC7A8 |
| Molecular Function | GO:0016799 | hydrolase activity, hydrolyzing N-glycosyl compounds                                                            | 7/2321 | 34/18352 | 0.1298701 | 0.4838955 | 0.4569292 | 7 | IL1R1/NEIL3/UNG/NTHL1/IL18RAP/IL18R1/MUTYH         |
| Molecular Function | GO:0071813 | lipoprotein particle binding                                                                                    | 7/2321 | 34/18352 | 0.1298701 | 0.4838955 | 0.4569292 | 7 | SORL1/LIPC/PLTP/THBS1/COLEC12/STAB2/ABCA1          |
| Molecular Function | GO:0071814 | protein-lipid complex binding                                                                                   | 7/2321 | 34/18352 | 0.1298701 | 0.4838955 | 0.4569292 | 7 | SORL1/LIPC/PLTP/THBS1/COLEC12/STAB2/ABCA1          |

|                    |            |                                                           |         |           |           |           |           |    |                                                                                                                   |
|--------------------|------------|-----------------------------------------------------------|---------|-----------|-----------|-----------|-----------|----|-------------------------------------------------------------------------------------------------------------------|
| Molecular Function | GO:0001102 | RNA polymerase II activating transcription factor binding | 9/2321  | 47/18352  | 0.1323037 | 0.4838955 | 0.4569292 | 9  | ZFPM1/CREB1/SMAD3/HIPK2/CREBBP/NFE2L2/RB1/TCF3/TP53BP1                                                            |
| Molecular Function | GO:0004725 | protein tyrosine phosphatase activity                     | 17/2321 | 101/18352 | 0.1329507 | 0.4838955 | 0.4569292 | 17 | SSH1/PTPRE/DUSP14/UBASH3B/DUSP22/PGP/PTPN6/SSH3/DUSP28/PTPRN2/CDC25A/PTPRJ/PTPRC/PALD1/DUSP3/CDC14A/PTPRU         |
| Molecular Function | GO:0051536 | iron-sulfur cluster binding                               | 12/2321 | 67/18352  | 0.1339129 | 0.4838955 | 0.4569292 | 12 | POLE/RTEL1/NDUFS2/FECH/FDX1/NDUFS8/NTHL1/CDKAL1/GLRX2/MUTYH/ERCC2/AOX1                                            |
| Molecular Function | GO:0051540 | metal cluster binding                                     | 12/2321 | 67/18352  | 0.1339129 | 0.4838955 | 0.4569292 | 12 | POLE/RTEL1/NDUFS2/FECH/FDX1/NDUFS8/NTHL1/CDKAL1/GLRX2/MUTYH/ERCC2/AOX1                                            |
| Molecular Function | GO:0019706 | protein-cysteine S-palmitoyltransferase activity          | 6/2321  | 28/18352  | 0.1339348 | 0.4838955 | 0.4569292 | 6  | ZDHHC18/ZDHHC14/ZDHHC2/ZDHHC7/ZDHHC17/ZDHHC1                                                                      |
| Molecular Function | GO:0019707 | protein-cysteine S-acyltransferase activity               | 6/2321  | 28/18352  | 0.1339348 | 0.4838955 | 0.4569292 | 6  | ZDHHC18/ZDHHC14/ZDHHC2/ZDHHC7/ZDHHC17/ZDHHC1                                                                      |
| Molecular Function | GO:0030507 | spectrin binding                                          | 6/2321  | 28/18352  | 0.1339348 | 0.4838955 | 0.4569292 | 6  | DCTN2/PTPRC/GNB3/ADD1/ANK2/SPTBN4                                                                                 |
| Molecular Function | GO:0035035 | histone acetyltransferase binding                         | 6/2321  | 28/18352  | 0.1339348 | 0.4838955 | 0.4569292 | 6  | CREB1/KANSL1/MTF1/ETS1/EPAS1/CEBPB                                                                                |
| Molecular Function | GO:0042826 | histone deacetylase binding                               | 19/2321 | 115/18352 | 0.1339763 | 0.4838955 | 0.4569292 | 19 | HDAC4/NCOR2/MEF2D/NACC2/HDAC1/ZBTB7B/PHB/RARA/MTA1/CAMTA2/MTA2/MEF2C/CEBPB/ANKRD1/UHRF1BP1/RELA/WDTC1/KCTD21/PRKN |

|                    |            |                                                           |        |          |           |           |           |   |                                |
|--------------------|------------|-----------------------------------------------------------|--------|----------|-----------|-----------|-----------|---|--------------------------------|
| Molecular Function | GO:0005229 | intracellular calcium activated chloride channel activity | 4/2321 | 16/18352 | 0.1343166 | 0.4838955 | 0.4569292 | 4 | ANO7/ANO10/ANO6/ANO8           |
| Molecular Function | GO:0005402 | carbohydrate:cation symporter activity                    | 4/2321 | 16/18352 | 0.1343166 | 0.4838955 | 0.4569292 | 4 | SLC45A4/SLC2A9/SLC5A10/SLC23A1 |
| Molecular Function | GO:0005521 | lamin binding                                             | 4/2321 | 16/18352 | 0.1343166 | 0.4838955 | 0.4569292 | 4 | SYNE1/NARF/PKP1/PLCB1          |
| Molecular Function | GO:0010181 | FMN binding                                               | 4/2321 | 16/18352 | 0.1343166 | 0.4838955 | 0.4569292 | 4 | POR/PPCDC/DUS2/DHODH           |
| Molecular Function | GO:0015095 | magnesium ion transmembrane transporter activity          | 4/2321 | 16/18352 | 0.1343166 | 0.4838955 | 0.4569292 | 4 | NIPAL3/ZDHHC17/CNNM2/SLC41A1   |
| Molecular Function | GO:0015172 | acidic amino acid transmembrane transporter activity      | 4/2321 | 16/18352 | 0.1343166 | 0.4838955 | 0.4569292 | 4 | SLC1A5/SLC1A2/SLC1A6/SLC1A3    |
| Molecular Function | GO:0015923 | mannosidase activity                                      | 4/2321 | 16/18352 | 0.1343166 | 0.4838955 | 0.4569292 | 4 | EDEM1/EDEM2/MAN2C1/MAN1C1      |
| Molecular Function | GO:0019211 | phosphatase activator activity                            | 4/2321 | 16/18352 | 0.1343166 | 0.4838955 | 0.4569292 | 4 | PPP2R5C/PPP2R5E/PPP2R5D/PTPA   |
| Molecular Function | GO:0030228 | lipoprotein particle receptor activity                    | 4/2321 | 16/18352 | 0.1343166 | 0.4838955 | 0.4569292 | 4 | SORL1/OLR1/STAB2/LRP10         |

|                    |            |                                                    |         |          |           |           |           |    |                                                                                       |
|--------------------|------------|----------------------------------------------------|---------|----------|-----------|-----------|-----------|----|---------------------------------------------------------------------------------------|
| Molecular Function | GO:0034979 | NAD-dependent protein deacetylase activity         | 4/2321  | 16/18352 | 0.1343166 | 0.4838955 | 0.4569292 | 4  | HDAC4/HDAC7/HDAC1/SIRT3                                                               |
| Molecular Function | GO:0035615 | clathrin adaptor activity                          | 4/2321  | 16/18352 | 0.1343166 | 0.4838955 | 0.4569292 | 4  | AP2A1/ARRB1/STON1/AP1G2                                                               |
| Molecular Function | GO:0045125 | bioactive lipid receptor activity                  | 4/2321  | 16/18352 | 0.1343166 | 0.4838955 | 0.4569292 | 4  | SPHK2/S1PR2/LPAR2/S1PR4                                                               |
| Molecular Function | GO:0046935 | 1-phosphatidylinositol-3-kinase regulator activity | 4/2321  | 16/18352 | 0.1343166 | 0.4838955 | 0.4569292 | 4  | PIK3R1/PIK3R6/PIK3R5/SLA2                                                             |
| Molecular Function | GO:0061778 | intracellular chloride channel activity            | 4/2321  | 16/18352 | 0.1343166 | 0.4838955 | 0.4569292 | 4  | ANO7/ANO10/ANO6/ANO8                                                                  |
| Molecular Function | GO:1990404 | protein ADP-ribosylase activity                    | 4/2321  | 16/18352 | 0.1343166 | 0.4838955 | 0.4569292 | 4  | TNKS/PARP4/PARP10/PARP9                                                               |
| Molecular Function | GO:0050321 | tau-protein kinase activity                        | 5/2321  | 22/18352 | 0.1361443 | 0.4896694 | 0.4623813 | 5  | MARK3/CSNK1D/SIK3/MARK2/PRKAA1                                                        |
| Molecular Function | GO:0001618 | virus receptor activity                            | 13/2321 | 74/18352 | 0.1366076 | 0.4897169 | 0.4624261 | 13 | SLC10A1/CD55/SLC1A5/CLEC5A/ITGB5/ITGB3/NPC1/SLC52A2/TYRO3/ITGB6/SIVA1/NECTIN1/NECTIN4 |
| Molecular Function | GO:0140272 | exogenous protein binding                          | 13/2321 | 74/18352 | 0.1366076 | 0.4897169 | 0.4624261 | 13 | SLC10A1/CD55/SLC1A5/CLEC5A/ITGB5/ITGB3/NPC1/SLC52A2/TYRO3/ITGB6/SIVA1/NECTIN1/NECTIN4 |

|                    |            |                                                         |         |           |           |           |           |    |                                                                                                                                                                                   |
|--------------------|------------|---------------------------------------------------------|---------|-----------|-----------|-----------|-----------|----|-----------------------------------------------------------------------------------------------------------------------------------------------------------------------------------|
| Molecular Function | GO:0004721 | phosphoprotein phosphatase activity                     | 28/2321 | 179/18352 | 0.1368429 | 0.4897536 | 0.4624608 | 28 | SSH1/CTDP1/PTPRE/LCK/DUSP14/UBASH3B/PHLPP1/DUSP22/PGP/CTDSPL/PTPN6/SSH3/DUSP28/PTPRN2/CDC25A/PTPRJ/LRRK1/PTPRC/PPP2R1A/PALD1/PPP1CB/PPP2R5D/DUSP3/PPP2R1B/CDC14A/LHPP/PPM1N/PTPRU |
| Molecular Function | GO:0005544 | calcium-dependent phospholipid binding                  | 10/2321 | 54/18352  | 0.1378049 | 0.4923867 | 0.4649472 | 10 | CPNE6/CPNE2/CPNE5/ANXA6/CPNE1/RPH3A/SYT17/DYSF/ESYT1/ANXA7                                                                                                                        |
| Molecular Function | GO:0042169 | SH2 domain binding                                      | 8/2321  | 41/18352  | 0.1390133 | 0.4958902 | 0.4682554 | 8  | LCK/AFAP1/LAX1/SH3PXD2B/PTPN6/FGFR1/SYNGR3/RUFY1                                                                                                                                  |
| Molecular Function | GO:0051117 | ATPase binding                                          | 15/2321 | 88/18352  | 0.1400929 | 0.4989234 | 0.4711196 | 15 | PDE4D/METTL21A/LCK/NR1H2/ATOX1/ABCA1/SNTA1/PEX26/RALA/PIH1D1/ANK2/RUVBL1/EZR/FBL/SVIP                                                                                             |
| Molecular Function | GO:0004714 | transmembrane receptor protein tyrosine kinase activity | 11/2321 | 61/18352  | 0.141921  | 0.504608  | 0.4764874 | 11 | NRP2/CSF1R/EPHB3/IGF1R/FLT1/FGFR1/CRIM1/NTRK1/INSRR/PDGFRB/TYRO3                                                                                                                  |
| Molecular Function | GO:0032266 | phosphatidylinositol-3-phosphate binding                | 9/2321  | 48/18352  | 0.1456445 | 0.5170022 | 0.4881909 | 9  | DENND1A/NCF4/SNX27/SH3PXD2B/WIPI2/SNX3/RUFY4/ZFYVE19/RUBCNL                                                                                                                       |
| Molecular Function | GO:0005546 | phosphatidylinositol-4,5-bisphosphate binding           | 14/2321 | 82/18352  | 0.1488338 | 0.5247057 | 0.4954652 | 14 | VILL/GSN/CAPG/ASAP1/SVIL/PFN1/PLCB1/SNX18/KCNQ1/RPH3A/AVIL/FLII/SDCBP2/GRAMD2A                                                                                                    |
| Molecular Function | GO:0008081 | phosphoric diester hydrolase activity                   | 15/2321 | 89/18352  | 0.1499236 | 0.5247057 | 0.4954652 | 15 | PDE4D/PDE6A/TDP1/PLD1/GPLD1/SMPDL3B/CCL5/PDE6H/PLCB1/PDE9A/PLCL1/PLD3/PDE3B/PLCG1/PLCD3                                                                                           |
| Molecular Function | GO:0004402 | histone acetyltransferase activity                      | 10/2321 | 55/18352  | 0.1504825 | 0.5247057 | 0.4954652 | 10 | SRCAP/BRCA2/KANSL1/BRD1/EPC1/TAF10/KANSL2/NCOA1/CREBBP/KAT7                                                                                                                       |

|                    |            |                                                           |        |          |           |           |           |   |                                       |
|--------------------|------------|-----------------------------------------------------------|--------|----------|-----------|-----------|-----------|---|---------------------------------------|
| Molecular Function | GO:0004181 | metallocarboxypeptidase activity                          | 6/2321 | 29/18352 | 0.1518713 | 0.5247057 | 0.4954652 | 6 | CPD/AGBL5/VASH1/AEBP1/CPB2/AGBL2      |
| Molecular Function | GO:0004693 | cyclin-dependent protein serine/threonine kinase activity | 6/2321 | 29/18352 | 0.1518713 | 0.5247057 | 0.4954652 | 6 | CDKL1/MOK/CDK14/CDKL4/CDKL3/CDK13     |
| Molecular Function | GO:0097472 | cyclin-dependent protein kinase activity                  | 6/2321 | 29/18352 | 0.1518713 | 0.5247057 | 0.4954652 | 6 | CDKL1/MOK/CDK14/CDKL4/CDKL3/CDK13     |
| Molecular Function | GO:1901567 | fatty acid derivative binding                             | 6/2321 | 29/18352 | 0.1518713 | 0.5247057 | 0.4954652 | 6 | S100A8/PPARG/ACOT7/ACBD3/HMGCL/ACADVL |
| Molecular Function | GO:0003995 | acyl-CoA dehydrogenase activity                           | 3/2321 | 11/18352 | 0.1535779 | 0.5247057 | 0.4954652 | 3 | ACAD8/ACADM/ACADVL                    |
| Molecular Function | GO:0004143 | diacylglycerol kinase activity                            | 3/2321 | 11/18352 | 0.1535779 | 0.5247057 | 0.4954652 | 3 | DGKQ/DGKA/DGKD                        |
| Molecular Function | GO:0005078 | MAP-kinase scaffold activity                              | 3/2321 | 11/18352 | 0.1535779 | 0.5247057 | 0.4954652 | 3 | KSR1/AKAP13/MAPK8IP2                  |
| Molecular Function | GO:0005527 | macrolide binding                                         | 3/2321 | 11/18352 | 0.1535779 | 0.5247057 | 0.4954652 | 3 | LCN2/FKBP5/NFATC1                     |
| Molecular Function | GO:0008296 | 3'-5'-exodeoxyribonuclease activity                       | 3/2321 | 11/18352 | 0.1535779 | 0.5247057 | 0.4954652 | 3 | POLE/MEIOB/ISG20                      |

|                    |            |                                             |        |          |           |           |           |   |                     |
|--------------------|------------|---------------------------------------------|--------|----------|-----------|-----------|-----------|---|---------------------|
| Molecular Function | GO:0008429 | phosphatidylethanolamine binding            | 3/2321 | 11/18352 | 0.1535779 | 0.5247057 | 0.4954652 | 3 | PLTP/NF1/ESYT1      |
| Molecular Function | GO:0015166 | polyol transmembrane transporter activity   | 3/2321 | 11/18352 | 0.1535779 | 0.5247057 | 0.4954652 | 3 | AQP1/AQP3/AQP9      |
| Molecular Function | GO:0035252 | UDP-xylosyltransferase activity             | 3/2321 | 11/18352 | 0.1535779 | 0.5247057 | 0.4954652 | 3 | XXYL1/XYL1/GXYLT2   |
| Molecular Function | GO:0042285 | xylosyltransferase activity                 | 3/2321 | 11/18352 | 0.1535779 | 0.5247057 | 0.4954652 | 3 | XXYL1/XYL1/GXYLT2   |
| Molecular Function | GO:0048407 | platelet-derived growth factor binding      | 3/2321 | 11/18352 | 0.1535779 | 0.5247057 | 0.4954652 | 3 | PDGFB/COL5A1/PDGFRB |
| Molecular Function | GO:0050786 | RAGE receptor binding                       | 3/2321 | 11/18352 | 0.1535779 | 0.5247057 | 0.4954652 | 3 | S100P/S100A8/FPR1   |
| Molecular Function | GO:0051400 | BH domain binding                           | 3/2321 | 11/18352 | 0.1535779 | 0.5247057 | 0.4954652 | 3 | BCL2/DNM1L/BCL2L1   |
| Molecular Function | GO:0052739 | phosphatidylserine 1-acylhydrolase activity | 3/2321 | 11/18352 | 0.1535779 | 0.5247057 | 0.4954652 | 3 | PLA2G15/LIPC/PLA1A  |
| Molecular Function | GO:0070513 | death domain binding                        | 3/2321 | 11/18352 | 0.1535779 | 0.5247057 | 0.4954652 | 3 | RIPK1/BCL2/BCL2L1   |

|                    |            |                                                                              |         |           |           |           |           |    |                                                                                                                                                                  |
|--------------------|------------|------------------------------------------------------------------------------|---------|-----------|-----------|-----------|-----------|----|------------------------------------------------------------------------------------------------------------------------------------------------------------------|
| Molecular Function | GO:0097493 | structural molecule activity conferring elasticity                           | 3/2321  | 11/18352  | 0.1535779 | 0.5247057 | 0.4954652 | 3  | EMILIN2/TTN/AHNAK                                                                                                                                                |
| Molecular Function | GO:1901474 | azole transmembrane transporter activity                                     | 3/2321  | 11/18352  | 0.1535779 | 0.5247057 | 0.4954652 | 3  | SLC15A4/SLC44A4/SLC7A1                                                                                                                                           |
| Molecular Function | GO:0030331 | estrogen receptor binding                                                    | 8/2321  | 42/18352  | 0.153843  | 0.5247057 | 0.4954652 | 8  | PPARG/PRMT2/ARRB1/PADI2/ZNF366/TAF10/RERG/NCOA1                                                                                                                  |
| Molecular Function | GO:0051539 | 4 iron, 4 sulfur cluster binding                                             | 8/2321  | 42/18352  | 0.153843  | 0.5247057 | 0.4954652 | 8  | POLE/RTEL1/NDUFS2/NDUFS8/NTHL1/CDKAL1/MUTYH/ERCC2                                                                                                                |
| Molecular Function | GO:0008757 | S-adenosylmethionine-dependent methyltransferase activity                    | 25/2321 | 160/18352 | 0.1540881 | 0.5247193 | 0.495478  | 25 | METTL21A/PRMT2/ASH2L/SETD2/SMYD3/COMT/EHMT2/WDR82/METTL6/KMT2D/TPMT/SETD1B/SETD1A/METTL22/PRDM16/DNMT1/FBL/HNMT/MECOM/METTL8/EEF1AKMT3/EEF1AKMT2/NSD3/NSD2/CSKMT |
| Molecular Function | GO:0140030 | modification-dependent protein binding                                       | 24/2321 | 153/18352 | 0.1552425 | 0.5278246 | 0.4984102 | 24 | BRD4/ZMYND8/TNFAIP3/UHRF1/ANKRD13B/CDYL/PTPN6/ANKRD13D/PRPF8/TNIP1/ANKRD13A/PHF19/KDM7A/TP53BP1/EPS15/CHD8/WDR81/ANK2/ING5/PARP10/BRD2/MINDY1/ABRAXAS1/BABAM2    |
| Molecular Function | GO:0004114 | 3',5'-cyclic-nucleotide phosphodiesterase activity                           | 5/2321  | 23/18352  | 0.1568998 | 0.5317975 | 0.5021618 | 5  | PDE4D/PDE6A/PDE6H/PDE9A/PDE3B                                                                                                                                    |
| Molecular Function | GO:0016493 | C-C chemokine receptor activity                                              | 5/2321  | 23/18352  | 0.1568998 | 0.5317975 | 0.5021618 | 5  | CCR2/ACKR2/CCR9/CXCR1/CX3CR1                                                                                                                                     |
| Molecular Function | GO:0008656 | cysteine-type endopeptidase activator activity involved in apoptotic process | 4/2321  | 17/18352  | 0.1590191 | 0.5348154 | 0.5050114 | 4  | CTSH/ATP2A3/CASP1/BCL2L13                                                                                                                                        |



|                    |            |                                                |         |           |           |           |           |    |                                                                                                                                                                                                                                                                                        |
|--------------------|------------|------------------------------------------------|---------|-----------|-----------|-----------|-----------|----|----------------------------------------------------------------------------------------------------------------------------------------------------------------------------------------------------------------------------------------------------------------------------------------|
| Molecular Function | GO:0030275 | LRR domain binding                             | 4/2321  | 17/18352  | 0.1590191 | 0.5348154 | 0.5050114 | 4  | ERC1/NRL/DAPK3/MRTFA                                                                                                                                                                                                                                                                   |
| Molecular Function | GO:0031420 | alkali metal ion binding                       | 4/2321  | 17/18352  | 0.1590191 | 0.5348154 | 0.5050114 | 4  | HDAC4/PDXK/PKM/ACAT1                                                                                                                                                                                                                                                                   |
| Molecular Function | GO:0035173 | histone kinase activity                        | 4/2321  | 17/18352  | 0.1590191 | 0.5348154 | 0.5050114 | 4  | BAZ1B/PRKCA/PRKCB/PRKAA1                                                                                                                                                                                                                                                               |
| Molecular Function | GO:0070122 | isopeptidase activity                          | 4/2321  | 17/18352  | 0.1590191 | 0.5348154 | 0.5050114 | 4  | GGT1/COP55/PRPF8/EIF3H                                                                                                                                                                                                                                                                 |
| Molecular Function | GO:0005200 | structural constituent of cytoskeleton         | 17/2321 | 104/18352 | 0.160403  | 0.5378074 | 0.5078367 | 17 | VILL/TLN2/TUBB4B/NEFM/EPB41L3/ACTG1/GFAP/SPTA1/TUBA4B/TUBA4A/TUBA8/ADD1/SPTAN1/ANK2/EPB42/SPTBN4/PPL                                                                                                                                                                                   |
| Molecular Function | GO:0051087 | chaperone binding                              | 17/2321 | 104/18352 | 0.160403  | 0.5378074 | 0.5078367 | 17 | KSR1/TBCD/CALR/AMFR/DNAJB13/BIN1/HSCB/CLU/CDC25A/DNAJB6/GRN/FNIP2/TIMM44/BAG5/PFDN6/AHSA2P/PRKN                                                                                                                                                                                        |
| Molecular Function | GO:0061630 | ubiquitin protein ligase activity              | 43/2321 | 292/18352 | 0.1611406 | 0.539449  | 0.5093868 | 43 | TRIM39/TRIM27/RNF145/RNF144A/MGRN1/RNF220/RNF19A/TRIM38/WWP2/UBR4/TRIM10/AMFR/MEFV/TRAIIP/CUL3/UHRF1/UBE2O/FBXO40/SMURF1/TRIM5/SH3RF3/ASB1/TRIM55/RNF144B/RNF25/NEURL3/TRAF3IP2/ZNF598/UBE3A/NEDD4/TRIP12/RNF14/RNF11/HECW2/NOSIP/FBXW11/TRIM7/HERC5/PELI1/TRIM26/MARCHF6/MARCHF8/PRKN |
| Molecular Function | GO:0097718 | disordered domain specific binding             | 7/2321  | 36/18352  | 0.1623038 | 0.540001  | 0.5099081 | 7  | GJA5/MYO5A/DFFB/NUMA1/RB1/TEAD2/EZR                                                                                                                                                                                                                                                    |
| Molecular Function | GO:0001085 | RNA polymerase II transcription factor binding | 10/2321 | 56/18352  | 0.1637259 | 0.540001  | 0.5099081 | 10 | HDAC4/ZFPM1/WWP2/NFATC1/HDAC1/GFI1B/CREBBP/MTA2/ATN1/ANKRD1                                                                                                                                                                                                                            |

|                    |            |                                                                        |         |           |           |          |           |    |                                                                                                                                                                                                                                                                                                                                                                                                                                    |
|--------------------|------------|------------------------------------------------------------------------|---------|-----------|-----------|----------|-----------|----|------------------------------------------------------------------------------------------------------------------------------------------------------------------------------------------------------------------------------------------------------------------------------------------------------------------------------------------------------------------------------------------------------------------------------------|
| Molecular Function | GO:0016798 | hydrolase activity, acting on glycosyl bonds                           | 21/2321 | 133/18352 | 0.1667845 | 0.540001 | 0.5099081 | 21 | HEXB/IL1R1/MACROD1/NEIL3/GALC/SMPDL3B/MGAM/LYG2/CHIT1/EDEM1/UNG/NTHL1/EDEM2/IL18RAP/IL18R1/MAN2C1/MUTYH/CLN5/MAN1C1/CEMIP2/MYORG                                                                                                                                                                                                                                                                                                   |
| Molecular Function | GO:0019787 | ubiquitin-like protein transferase activity                            | 65/2321 | 457/18352 | 0.1692607 | 0.540001 | 0.5099081 | 65 | TRIM39/MAEA/HDAC4/TRIM27/RNF145/RNF144A/MGRN1/RNF220/RNF19A/TRIM38/WWP2/HERC3/UBR4/LNX1/TRIM10/AMFR/MEFV/TRAF2/TNFAIP3/NSMCE2/FBXO7/TRAIIP/CUL3/UHRF1/MIB1/UBE2O/FBXW2/UBE2J2/FBXO40/SMURF1/LMO7/RNF212/TRIM5/UBE2V1/SH3RF3/UBE2Q2/RNF214/ASB1/TRIM55/RNF213/RNF144B/KLHL21/RNF25/FBXL6/NEURL3/TRAF3IP2/ZNF598/UBE3A/NEDD4/TRIP12/RNF14/RNF11/HECW2/NOSIP/FBXW11/RNF40/TRIM7/HERC5/UBE2D2/PEL1/TRIM26/MARCHF6/MARCHF3/MARCHF8/PRKN |
| Molecular Function | GO:0016903 | oxidoreductase activity, acting on the aldehyde or oxo group of donors | 8/2321  | 43/18352  | 0.1693905 | 0.540001 | 0.5099081 | 8  | FAR2/ALDH2/DHTKD1/OGDH/ALDH4A1/BCKDHA/ALDH1A2/AOX1                                                                                                                                                                                                                                                                                                                                                                                 |
| Molecular Function | GO:0000268 | peroxisome targeting sequence binding                                  | 2/2321  | 6/18352   | 0.169743  | 0.540001 | 0.5099081 | 2  | CAT/BABAM2                                                                                                                                                                                                                                                                                                                                                                                                                         |
| Molecular Function | GO:0000992 | RNA polymerase III cis-regulatory region sequence-specific DNA binding | 2/2321  | 6/18352   | 0.169743  | 0.540001 | 0.5099081 | 2  | RPTOR/BRF1                                                                                                                                                                                                                                                                                                                                                                                                                         |
| Molecular Function | GO:0001006 | RNA polymerase III type 3 promoter sequence-specific DNA binding       | 2/2321  | 6/18352   | 0.169743  | 0.540001 | 0.5099081 | 2  | RPTOR/BRF1                                                                                                                                                                                                                                                                                                                                                                                                                         |
| Molecular Function | GO:0001727 | lipid kinase activity                                                  | 2/2321  | 6/18352   | 0.169743  | 0.540001 | 0.5099081 | 2  | SPHK2/CERK                                                                                                                                                                                                                                                                                                                                                                                                                         |
| Molecular Function | GO:0004064 | arylesterase activity                                                  | 2/2321  | 6/18352   | 0.169743  | 0.540001 | 0.5099081 | 2  | APMAP/CA1                                                                                                                                                                                                                                                                                                                                                                                                                          |
| Molecular Function | GO:0004430 | 1-phosphatidylinositol 4-kinase activity                               | 2/2321  | 6/18352   | 0.169743  | 0.540001 | 0.5099081 | 2  | PI4K2A/PI4KA                                                                                                                                                                                                                                                                                                                                                                                                                       |

|                    |            |                                                    |        |         |          |          |           |   |                 |
|--------------------|------------|----------------------------------------------------|--------|---------|----------|----------|-----------|---|-----------------|
| Molecular Function | GO:0004704 | NF-kappaB-inducing kinase activity                 | 2/2321 | 6/18352 | 0.169743 | 0.540001 | 0.5099081 | 2 | RIPK3/MAP3K14   |
| Molecular Function | GO:0004969 | histamine receptor activity                        | 2/2321 | 6/18352 | 0.169743 | 0.540001 | 0.5099081 | 2 | HRH1/ZNF219     |
| Molecular Function | GO:0005042 | netrin receptor activity                           | 2/2321 | 6/18352 | 0.169743 | 0.540001 | 0.5099081 | 2 | UNC5B/UNC5D     |
| Molecular Function | GO:0005167 | neurotrophin TRK receptor binding                  | 2/2321 | 6/18352 | 0.169743 | 0.540001 | 0.5099081 | 2 | PIK3R1/PLCG1    |
| Molecular Function | GO:0005168 | neurotrophin TRKA receptor binding                 | 2/2321 | 6/18352 | 0.169743 | 0.540001 | 0.5099081 | 2 | PIK3R1/PLCG1    |
| Molecular Function | GO:0009378 | four-way junction helicase activity                | 2/2321 | 6/18352 | 0.169743 | 0.540001 | 0.5099081 | 2 | BLM/RECQL5      |
| Molecular Function | GO:0015129 | lactate transmembrane transporter activity         | 2/2321 | 6/18352 | 0.169743 | 0.540001 | 0.5099081 | 2 | SLC16A3/SLC16A1 |
| Molecular Function | GO:0015349 | thyroid hormone transmembrane transporter activity | 2/2321 | 6/18352 | 0.169743 | 0.540001 | 0.5099081 | 2 | SLC7A5/SLC7A8   |
| Molecular Function | GO:0016421 | CoA carboxylase activity                           | 2/2321 | 6/18352 | 0.169743 | 0.540001 | 0.5099081 | 2 | ACACB/ACACA     |

|                    |            |                                                                                                    |        |         |          |          |           |   |                  |
|--------------------|------------|----------------------------------------------------------------------------------------------------|--------|---------|----------|----------|-----------|---|------------------|
| Molecular Function | GO:0016812 | hydrolase activity, acting on carbon-nitrogen (but not peptide) bonds, in cyclic amides            | 2/2321 | 6/18352 | 0.169743 | 0.540001 | 0.5099081 | 2 | DPYS/CD101       |
| Molecular Function | GO:0017083 | 4-galactosyl-N-acetylglucosaminide 3-alpha-L-fucosyltransferase activity                           | 2/2321 | 6/18352 | 0.169743 | 0.540001 | 0.5099081 | 2 | FUT4/FUT7        |
| Molecular Function | GO:0031493 | nucleosomal histone binding                                                                        | 2/2321 | 6/18352 | 0.169743 | 0.540001 | 0.5099081 | 2 | UHRF1/SPHK2      |
| Molecular Function | GO:0043546 | molybdopterin cofactor binding                                                                     | 2/2321 | 6/18352 | 0.169743 | 0.540001 | 0.5099081 | 2 | AOX1/MTARC1      |
| Molecular Function | GO:0044323 | retinoic acid-responsive element binding                                                           | 2/2321 | 6/18352 | 0.169743 | 0.540001 | 0.5099081 | 2 | RXRA/RARA        |
| Molecular Function | GO:0046934 | phosphatidylinositol-4,5-bisphosphate 3-kinase activity                                            | 2/2321 | 6/18352 | 0.169743 | 0.540001 | 0.5099081 | 2 | PIK3CD/PIK3R6    |
| Molecular Function | GO:0047238 | glucuronosyl-N-acetylgalactosaminyl-proteoglycan 4-beta-N-acetylgalactosaminyltransferase activity | 2/2321 | 6/18352 | 0.169743 | 0.540001 | 0.5099081 | 2 | CSGALNACT1/CHSY1 |
| Molecular Function | GO:0050544 | arachidonic acid binding                                                                           | 2/2321 | 6/18352 | 0.169743 | 0.540001 | 0.5099081 | 2 | S100A8/PPARG     |
| Molecular Function | GO:0051434 | BH3 domain binding                                                                                 | 2/2321 | 6/18352 | 0.169743 | 0.540001 | 0.5099081 | 2 | BCL2/BCL2L1      |

|                    |            |                                                     |         |           |           |           |           |    |                                                                                                                                                                                                                                                                                                                                                                                                                  |                                                                                                                            |
|--------------------|------------|-----------------------------------------------------|---------|-----------|-----------|-----------|-----------|----|------------------------------------------------------------------------------------------------------------------------------------------------------------------------------------------------------------------------------------------------------------------------------------------------------------------------------------------------------------------------------------------------------------------|----------------------------------------------------------------------------------------------------------------------------|
| Molecular Function | GO:0052658 | inositol-1,4,5-trisphosphate 5-phosphatase activity | 2/2321  | 6/18352   | 0.169743  | 0.540001  | 0.5099081 | 2  |                                                                                                                                                                                                                                                                                                                                                                                                                  | INPP5A/INPP5D                                                                                                              |
| Molecular Function | GO:0052813 | phosphatidylinositol bisphosphate kinase activity   | 2/2321  | 6/18352   | 0.169743  | 0.540001  | 0.5099081 | 2  |                                                                                                                                                                                                                                                                                                                                                                                                                  | PIK3CD/PIK3R6                                                                                                              |
| Molecular Function | GO:0070087 | chromo shadow domain binding                        | 2/2321  | 6/18352   | 0.169743  | 0.540001  | 0.5099081 | 2  |                                                                                                                                                                                                                                                                                                                                                                                                                  | SP100/CHAF1A                                                                                                               |
| Molecular Function | GO:0140327 | flippase activity                                   | 2/2321  | 6/18352   | 0.169743  | 0.540001  | 0.5099081 | 2  |                                                                                                                                                                                                                                                                                                                                                                                                                  | TMEM30A/ATP8B1                                                                                                             |
| Molecular Function | GO:0140328 | floppase activity                                   | 2/2321  | 6/18352   | 0.169743  | 0.540001  | 0.5099081 | 2  |                                                                                                                                                                                                                                                                                                                                                                                                                  | ABCG1/ABCA1                                                                                                                |
| Molecular Function | GO:0061659 | ubiquitin-like protein ligase activity              | 44/2321 | 301/18352 | 0.1704461 | 0.5410109 | 0.5108617 | 44 | TRIM39/TRIM27/RNF145/RNF144A/MGRN1/RNF220/RNF19A/TRIM38/WWP2/UBR4/TRIM10/AMFR/MEFV/NSMCE2/TRAIP/CUL3/UHRF1/UBE2O/FBXO40/SMURF1/TRIM5/SH3RF3/ASB1/TRIM55/RNF144B/RNF25/NEURL3/TRAFF3IP2/ZNF598/UBE3A/NEDD4/TRIP12/RNF14/RNF11/HECW2/NOSIP/FBXW11/TRIM7/HERC5/PELI1/TRIM26/MARCHF6/MARCHF8/PRKN                                                                                                                    |                                                                                                                            |
| Molecular Function | GO:0015294 | solute:cation symporter activity                    | 16/2321 | 98/18352  | 0.1705598 | 0.5410109 | 0.5108617 | 16 |                                                                                                                                                                                                                                                                                                                                                                                                                  | SLC10A1/MFSD2A/SLC45A4/SLC11A2/SLC2A9/SLC13A4/SLC1A2/SLC1A6/SLC36A3/SLC1A3/SLC33A1/SLC5A10/SLC13A5/SLC12A1/SLC12A7/SLC23A1 |
| Molecular Function | GO:0005343 | organic acid:sodium symporter activity              | 6/2321  | 30/18352  | 0.1708063 | 0.5410109 | 0.5108617 | 6  |                                                                                                                                                                                                                                                                                                                                                                                                                  | SLC10A1/SLC1A2/SLC1A6/SLC1A3/SLC13A5/SLC23A1                                                                               |
| Molecular Function | GO:0004842 | ubiquitin-protein transferase activity              | 62/2321 | 435/18352 | 0.1713363 | 0.5410397 | 0.5108889 | 62 | TRIM39/MAEA/TRIM27/RNF145/RNF144A/MGRN1/RNF220/RNF19A/TRIM38/WWP2/HERC3/UBR4/LNX1/TRIM10/AMFR/MEFV/TRAFF2/TNFAIP3/FBXO7/TRAIP/CUL3/UHRF1/MIB1/UBE2O/FBXW2/UBE2J2/FBXO40/SMURF1/LMO7/TRIM5/UBE2V1/SH3RF3/UBE2Q2/RNF214/ASB1/TRIM55/RNF213/RNF144B/KLHL21/RNF25/FBXL6/NEURL3/TRAFF3IP2/ZNF598/UBE3A/NEDD4/TRIP12/RNF14/RNF11/HECW2/NOSIP/FBXW11/RNF40/TRIM7/HERC5/UBE2D2/PELI1/TRIM26/MARCHF6/MARCHF3/MARCHF8/PRKN |                                                                                                                            |

|                    |            |                                                      |         |          |           |           |           |    |                                                                                |
|--------------------|------------|------------------------------------------------------|---------|----------|-----------|-----------|-----------|----|--------------------------------------------------------------------------------|
| Molecular Function | GO:0061733 | peptide-lysine-N-acetyltransferase activity          | 10/2321 | 57/18352 | 0.1775122 | 0.5410397 | 0.5108889 | 10 | SRCAP/BRCA2/KANSL1/BRD1/EPC1/TAF10/KANSL2/NCOA1/CREBBP/KAT7                    |
| Molecular Function | GO:0004622 | lysophospholipase activity                           | 5/2321  | 24/18352 | 0.1788502 | 0.5410397 | 0.5108889 | 5  | PLA2G15/MGLL/LIPC/ASPG/LYPLA2                                                  |
| Molecular Function | GO:0008327 | methyl-CpG binding                                   | 5/2321  | 24/18352 | 0.1788502 | 0.5410397 | 0.5108889 | 5  | CXXC5/ZBTB38/UHRF1/DNMT1/ZBTB4                                                 |
| Molecular Function | GO:0070006 | metalloaminopeptidase activity                       | 5/2321  | 24/18352 | 0.1788502 | 0.5410397 | 0.5108889 | 5  | LNPEP/DPP3/XPNPEP1/RNPEPL1/AOPEP                                               |
| Molecular Function | GO:0030145 | manganese ion binding                                | 11/2321 | 64/18352 | 0.1796533 | 0.5410397 | 0.5108889 | 11 | GALNT2/XXYLT1/ADCY2/MGAT5/B4GALT7/DYRK2/XPNPEP1/HMGCL/PCK2/FAM20C/PPM1N        |
| Molecular Function | GO:0030551 | cyclic nucleotide binding                            | 7/2321  | 37/18352 | 0.1797559 | 0.5410397 | 0.5108889 | 7  | PDE4D/PRKAR1B/RAPGEF2/SLC19A1/CNGA4/PDE6H/STING1                               |
| Molecular Function | GO:0003678 | DNA helicase activity                                | 13/2321 | 78/18352 | 0.181609  | 0.5410397 | 0.5108889 | 13 | BLM/RTEL1/MCM5/WRNIP1/RECQL5/IGHMBP2/MCM2/SMARCAL1/CHD9/CHD8/RUVBL1/ERCC2/FBH1 |
| Molecular Function | GO:0016755 | transferase activity, transferring amino-acyl groups | 4/2321  | 18/18352 | 0.1852244 | 0.5410397 | 0.5108889 | 4  | GGT1/TGM5/TGM3/EPB42                                                           |
| Molecular Function | GO:0019783 | ubiquitin-like protein-specific protease activity    | 4/2321  | 18/18352 | 0.1852244 | 0.5410397 | 0.5108889 | 4  | OTUB2/COP5/OTUB1/UCHL3                                                         |

|                    |            |                                                        |         |           |           |           |           |    |                                                                                                                                                                                                                                                                                  |
|--------------------|------------|--------------------------------------------------------|---------|-----------|-----------|-----------|-----------|----|----------------------------------------------------------------------------------------------------------------------------------------------------------------------------------------------------------------------------------------------------------------------------------|
| Molecular Function | GO:0031435 | mitogen-activated protein kinase kinase kinase binding | 4/2321  | 18/18352  | 0.1852244 | 0.5410397 | 0.5108889 | 4  | TRAF2/TGFBR2/TCF3/DAZAP2                                                                                                                                                                                                                                                         |
| Molecular Function | GO:0048038 | quinone binding                                        | 4/2321  | 18/18352  | 0.1852244 | 0.5410397 | 0.5108889 | 4  | NDUFS2/TP53I3/SDHD/DHODH                                                                                                                                                                                                                                                         |
| Molecular Function | GO:0098641 | cadherin binding involved in cell-cell adhesion        | 4/2321  | 18/18352  | 0.1852244 | 0.5410397 | 0.5108889 | 4  | BAIAP2L1/CDC42EP1/BAIAP2/TMOD3                                                                                                                                                                                                                                                   |
| Molecular Function | GO:0098918 | structural constituent of synapse                      | 4/2321  | 18/18352  | 0.1852244 | 0.5410397 | 0.5108889 | 4  | ACTN1/CTBP2/ACTG1/DNM3                                                                                                                                                                                                                                                           |
| Molecular Function | GO:0003924 | GTPase activity                                        | 47/2321 | 326/18352 | 0.1865248 | 0.5410397 | 0.5108889 | 47 | RHOH/RAB2A/ARHGDI1/RAP1B/RAB5C/RHOG/RAB5B/DNM2/RAB31/RHEB/GNAZ/AGAP1/RHOF/TUBB4B/RAB27A/GNAI2/RGS6/GNAT2/RGS12/MTG2/RHOBTB2/RERG/RAB40C/GNG7/RAB43/RGS17/GNA11/GNB3/TUBA4B/TUBA4A/TUBA8/DNM1/RALA/RGS3/DNM3/GNG2/GNAO1/DNM1L/GNA12/RAB30/RGS10/RABL2A/ARF5/ATL1/GPN1/MX1/SEPTIN9 |
| Molecular Function | GO:0005542 | folic acid binding                                     | 3/2321  | 12/18352  | 0.1865281 | 0.5410397 | 0.5108889 | 3  | FOLR3/MTHFS/SLC19A1                                                                                                                                                                                                                                                              |
| Molecular Function | GO:0008970 | phospholipase A1 activity                              | 3/2321  | 12/18352  | 0.1865281 | 0.5410397 | 0.5108889 | 3  | PLA2G15/LIPC/PLA1A                                                                                                                                                                                                                                                               |
| Molecular Function | GO:0015250 | water channel activity                                 | 3/2321  | 12/18352  | 0.1865281 | 0.5410397 | 0.5108889 | 3  | AQP1/AQP3/AQP9                                                                                                                                                                                                                                                                   |
| Molecular Function | GO:0042301 | phosphate ion binding                                  | 3/2321  | 12/18352  | 0.1865281 | 0.5410397 | 0.5108889 | 3  | PNP/RPH3A/RELA                                                                                                                                                                                                                                                                   |

|                    |            |                                                       |         |          |           |           |           |    |                                                                          |
|--------------------|------------|-------------------------------------------------------|---------|----------|-----------|-----------|-----------|----|--------------------------------------------------------------------------|
| Molecular Function | GO:0045295 | gamma-catenin binding                                 | 3/2321  | 12/18352 | 0.1865281 | 0.5410397 | 0.5108889 | 3  | TCF7L2/PTPRJ/CDH1                                                        |
| Molecular Function | GO:0046975 | histone methyltransferase activity (H3-K36 specific)  | 3/2321  | 12/18352 | 0.1865281 | 0.5410397 | 0.5108889 | 3  | SETD2/NSD3/NSD2                                                          |
| Molecular Function | GO:0089720 | caspase binding                                       | 3/2321  | 12/18352 | 0.1865281 | 0.5410397 | 0.5108889 | 3  | NLRC4/NOL3/FADD                                                          |
| Molecular Function | GO:0099186 | structural constituent of postsynapse                 | 3/2321  | 12/18352 | 0.1865281 | 0.5410397 | 0.5108889 | 3  | ACTN1/ACTG1/DNM3                                                         |
| Molecular Function | GO:0031593 | polyubiquitin modification-dependent protein binding  | 9/2321  | 51/18352 | 0.1894256 | 0.5410397 | 0.5108889 | 9  | TNFAIP3/PRPF8/TNIP1/EPS15/WDR81/PARP10/MINDY1/ABRAXAS1/BABAM2            |
| Molecular Function | GO:0098632 | cell-cell adhesion mediator activity                  | 9/2321  | 51/18352 | 0.1894256 | 0.5410397 | 0.5108889 | 9  | BSG/JUP/BAIAP2L1/CDC42EP1/BAIAP2/TMOD3/JAM3/DSCAML1/GLDN                 |
| Molecular Function | GO:0042605 | peptide antigen binding                               | 6/2321  | 31/18352 | 0.1906574 | 0.5410397 | 0.5108889 | 6  | MAML1/HLA-C/HLA-F/SLC7A5/TRGV9/SLC7A8                                    |
| Molecular Function | GO:0070566 | adenylyltransferase activity                          | 6/2321  | 31/18352 | 0.1906574 | 0.5410397 | 0.5108889 | 6  | NMNAT3/PAPSS2/TUT1/PAPOLG/TENT5C/TENT5A                                  |
| Molecular Function | GO:0042625 | ATPase-coupled ion transmembrane transporter activity | 10/2321 | 58/18352 | 0.1918154 | 0.5410397 | 0.5108889 | 10 | FXYD2/ATP8A1/ATP2B2/ATP6V1B2/ATP2A3/ABCC3/ATP6V0B/ATP7B/ATP6V0C/ATP6V1C1 |



|                    |            |                                                                |         |           |           |           |           |    |                                                                                                                                                                                                                                                                             |
|--------------------|------------|----------------------------------------------------------------|---------|-----------|-----------|-----------|-----------|----|-----------------------------------------------------------------------------------------------------------------------------------------------------------------------------------------------------------------------------------------------------------------------------|
| Molecular Function | GO:0016757 | transferase activity,<br>transferring glycosyl groups          | 40/2321 | 275/18352 | 0.1924607 | 0.5410397 | 0.5108889 | 40 | CSGALNACT1/FUT4/GALNT2/FUT7/RPN1/XXYLT1/TNKS/HEXB/MGAT5/ST6GALNAC1/GALNT12/CHSY1/MGAT4A/MGAT3/XYLT1/GXYLT2/B4GALT7/POMT2/B3GNT5/ST6GAL1/PARP4/S<br>T8SIA6/ST3GAL4/ART5/PNP/B4GALT3/ART4/GALNT9/PIGQ/FUT11/GCNT2/ALG11/PARP10/PARP9/HAS3/DPAGT1/ST3GAL2/GLT8D1/B3GNT2/B4GAT1 |
| Molecular Function | GO:0034212 | peptide N-acetyltransferase<br>activity                        | 11/2321 | 65/18352  | 0.1931858 | 0.5410397 | 0.5108889 | 11 | SRCAP/BRCA2/KANSL1/BRD1/EPC1/TAF10/KANSL2/NCOA1/CREBBP/NAA16/KAT7                                                                                                                                                                                                           |
| Molecular Function | GO:0015605 | organophosphate ester<br>transmembrane transporter<br>activity | 7/2321  | 38/18352  | 0.197954  | 0.5410397 | 0.5108889 | 7  | SLC25A25/MFSD2A/SLC44A4/SLC37A1/SLC33A1/ABCC11/SLC25A1                                                                                                                                                                                                                      |
| Molecular Function | GO:0019842 | vitamin binding                                                | 22/2321 | 144/18352 | 0.2010481 | 0.5410397 | 0.5108889 | 22 | SPTLC2/GADL1/VDR/CBS/FOLR3/DHTKD1/DDC/MTHFS/OGDH/PC/SLC19A1/AGXT/ALAS1/CD320/ACACB/PDXX/P4HA2/PDXDC1/ALDH1A2/P3H3/P3H1/MTARC1                                                                                                                                               |
| Molecular Function | GO:0004112 | cyclic-nucleotide<br>phosphodiesterase activity                | 5/2321  | 25/18352  | 0.2018622 | 0.5410397 | 0.5108889 | 5  | PDE4D/PDE6A/PDE6H/PDE9A/PDE3B                                                                                                                                                                                                                                               |
| Molecular Function | GO:0032182 | ubiquitin-like protein binding                                 | 15/2321 | 94/18352  | 0.2043169 | 0.5410397 | 0.5108889 | 15 | TOLLIP/RAE1/SMAD3/TNFAIP3/FBXO7/OTUB2/UBXN1/OTUB1/UBXN2A/NEDD4/MVB12A/UCHL3/PRKN/ILRUN/MARCHF7                                                                                                                                                                              |
| Molecular Function | GO:0002039 | p53 binding                                                    | 11/2321 | 66/18352  | 0.2071586 | 0.5410397 | 0.5108889 | 11 | BLM/BRD4/EHMT2/ZNF385A/HDAC1/HTT/CREBBP/TP53BP1/TP53BP2/CHD8/ANKRD1                                                                                                                                                                                                         |
| Molecular Function | GO:0016417 | S-acyltransferase activity                                     | 6/2321  | 32/18352  | 0.2113352 | 0.5410397 | 0.5108889 | 6  | ZDHHC18/ZDHHC14/ZDHHC2/ZDHHC7/ZDHHC17/ZDHHC1                                                                                                                                                                                                                                |
| Molecular Function | GO:0031369 | translation initiation factor<br>binding                       | 6/2321  | 32/18352  | 0.2113352 | 0.5410397 | 0.5108889 | 6  | EIF2B5/LARP1/EIF3M/HHEX/OTX2/EIF4G1                                                                                                                                                                                                                                         |

|                    |            |                                                                                  |        |          |           |           |           |   |                                   |
|--------------------|------------|----------------------------------------------------------------------------------|--------|----------|-----------|-----------|-----------|---|-----------------------------------|
| Molecular Function | GO:0051721 | protein phosphatase 2A binding                                                   | 6/2321 | 32/18352 | 0.2113352 | 0.5410397 | 0.5108889 | 6 | SMG7/STRN4/BCL2/FOXO1/ANKLE2/PTPA |
| Molecular Function | GO:0001091 | RNA polymerase II general transcription initiation factor binding                | 4/2321 | 19/18352 | 0.2126967 | 0.5410397 | 0.5108889 | 4 | CTDP1/ERCC1/RUVBL1/FBL            |
| Molecular Function | GO:0003756 | protein disulfide isomerase activity                                             | 4/2321 | 19/18352 | 0.2126967 | 0.5410397 | 0.5108889 | 4 | P4HB/PDIAS/ITGB3/GLRX2            |
| Molecular Function | GO:0004675 | transmembrane receptor protein serine/threonine kinase activity                  | 4/2321 | 19/18352 | 0.2126967 | 0.5410397 | 0.5108889 | 4 | LTBP1/TGFBR2/BMPRI1/ENG           |
| Molecular Function | GO:0005416 | amino acid:cation symporter activity                                             | 4/2321 | 19/18352 | 0.2126967 | 0.5410397 | 0.5108889 | 4 | SLC1A2/SLC1A6/SLC36A3/SLC1A3      |
| Molecular Function | GO:0016864 | intramolecular oxidoreductase activity, transposing S-S bonds                    | 4/2321 | 19/18352 | 0.2126967 | 0.5410397 | 0.5108889 | 4 | P4HB/PDIAS/ITGB3/GLRX2            |
| Molecular Function | GO:0050664 | oxidoreductase activity, acting on NAD(P)H, oxygen as acceptor                   | 4/2321 | 19/18352 | 0.2126967 | 0.5410397 | 0.5108889 | 4 | NCF4/MICAL1/MICAL2/NCF2           |
| Molecular Function | GO:0001016 | RNA polymerase III transcription regulatory region sequence-specific DNA binding | 2/2321 | 7/18352  | 0.2185587 | 0.5410397 | 0.5108889 | 2 | RPTOR/BRF1                        |
| Molecular Function | GO:0003997 | acyl-CoA oxidase activity                                                        | 2/2321 | 7/18352  | 0.2185587 | 0.5410397 | 0.5108889 | 2 | ACOXL/ACOX2                       |

|                    |            |                                                                |        |         |           |           |           |   |                 |
|--------------------|------------|----------------------------------------------------------------|--------|---------|-----------|-----------|-----------|---|-----------------|
| Molecular Function | GO:0004128 | cytochrome-b5 reductase activity, acting on NAD(P)H            | 2/2321 | 7/18352 | 0.2185587 | 0.5410397 | 0.5108889 | 2 | POR/CYB5RL      |
| Molecular Function | GO:0004791 | thioredoxin-disulfide reductase activity                       | 2/2321 | 7/18352 | 0.2185587 | 0.5410397 | 0.5108889 | 2 | NXN/TXNRD2      |
| Molecular Function | GO:0004908 | interleukin-1 receptor activity                                | 2/2321 | 7/18352 | 0.2185587 | 0.5410397 | 0.5108889 | 2 | IL1R1/IL18R1    |
| Molecular Function | GO:0004931 | extracellularly ATP-gated cation channel activity              | 2/2321 | 7/18352 | 0.2185587 | 0.5410397 | 0.5108889 | 2 | P2RX1/P2RX5     |
| Molecular Function | GO:0005021 | vascular endothelial growth factor-activated receptor activity | 2/2321 | 7/18352 | 0.2185587 | 0.5410397 | 0.5108889 | 2 | NRP2/FLT1       |
| Molecular Function | GO:0005223 | intracellular cGMP-activated cation channel activity           | 2/2321 | 7/18352 | 0.2185587 | 0.5410397 | 0.5108889 | 2 | AQP1/CNGA4      |
| Molecular Function | GO:0005337 | nucleoside transmembrane transporter activity                  | 2/2321 | 7/18352 | 0.2185587 | 0.5410397 | 0.5108889 | 2 | SLC29A3/SLC29A1 |
| Molecular Function | GO:0005351 | carbohydrate:proton symporter activity                         | 2/2321 | 7/18352 | 0.2185587 | 0.5410397 | 0.5108889 | 2 | SLC45A4/SLC2A9  |
| Molecular Function | GO:0008420 | RNA polymerase II CTD heptapeptide repeat phosphatase activity | 2/2321 | 7/18352 | 0.2185587 | 0.5410397 | 0.5108889 | 2 | CTDP1/CTDSPL    |

|                    |            |                                                              |        |         |           |           |           |   |                 |
|--------------------|------------|--------------------------------------------------------------|--------|---------|-----------|-----------|-----------|---|-----------------|
| Molecular Function | GO:0008443 | phosphofructokinase activity                                 | 2/2321 | 7/18352 | 0.2185587 | 0.5410397 | 0.5108889 | 2 | PFKFB4/PFKFB3   |
| Molecular Function | GO:0015194 | L-serine transmembrane transporter activity                  | 2/2321 | 7/18352 | 0.2185587 | 0.5410397 | 0.5108889 | 2 | SLC1A5/SFXN1    |
| Molecular Function | GO:0015204 | urea transmembrane transporter activity                      | 2/2321 | 7/18352 | 0.2185587 | 0.5410397 | 0.5108889 | 2 | AQP3/AQP9       |
| Molecular Function | GO:0015658 | branched-chain amino acid transmembrane transporter activity | 2/2321 | 7/18352 | 0.2185587 | 0.5410397 | 0.5108889 | 2 | SLC7A5/SLC7A8   |
| Molecular Function | GO:0016308 | 1-phosphatidylinositol-4-phosphate 5-kinase activity         | 2/2321 | 7/18352 | 0.2185587 | 0.5410397 | 0.5108889 | 2 | PIP5K1B/PIP4K2A |
| Molecular Function | GO:0019534 | toxin transmembrane transporter activity                     | 2/2321 | 7/18352 | 0.2185587 | 0.5410397 | 0.5108889 | 2 | ABCG1/SLC7A8    |
| Molecular Function | GO:0030283 | testosterone dehydrogenase [NAD(P)] activity                 | 2/2321 | 7/18352 | 0.2185587 | 0.5410397 | 0.5108889 | 2 | DHRS9/HSD17B2   |
| Molecular Function | GO:0030619 | U1 snRNA binding                                             | 2/2321 | 7/18352 | 0.2185587 | 0.5410397 | 0.5108889 | 2 | PRPF8/ISG20     |
| Molecular Function | GO:0031702 | type 1 angiotensin receptor binding                          | 2/2321 | 7/18352 | 0.2185587 | 0.5410397 | 0.5108889 | 2 | ARAP1/ARRB2     |

|                    |            |                                                         |        |         |           |           |           |   |               |
|--------------------|------------|---------------------------------------------------------|--------|---------|-----------|-----------|-----------|---|---------------|
| Molecular Function | GO:0031730 | CCR5 chemokine receptor binding                         | 2/2321 | 7/18352 | 0.2185587 | 0.5410397 | 0.5108889 | 2 | CCL5/CNIH4    |
| Molecular Function | GO:0034235 | GPI anchor binding                                      | 2/2321 | 7/18352 | 0.2185587 | 0.5410397 | 0.5108889 | 2 | PIGU/CEACAM5  |
| Molecular Function | GO:0034594 | phosphatidylinositol trisphosphate phosphatase activity | 2/2321 | 7/18352 | 0.2185587 | 0.5410397 | 0.5108889 | 2 | INPP5D/INPP5E |
| Molecular Function | GO:0035184 | histone threonine kinase activity                       | 2/2321 | 7/18352 | 0.2185587 | 0.5410397 | 0.5108889 | 2 | PRKCA/PRKCB   |
| Molecular Function | GO:0036310 | annealing helicase activity                             | 2/2321 | 7/18352 | 0.2185587 | 0.5410397 | 0.5108889 | 2 | BLM/SMARCAL1  |
| Molecular Function | GO:0048039 | ubiquinone binding                                      | 2/2321 | 7/18352 | 0.2185587 | 0.5410397 | 0.5108889 | 2 | SDHD/DHODH    |
| Molecular Function | GO:0050542 | icosanoid binding                                       | 2/2321 | 7/18352 | 0.2185587 | 0.5410397 | 0.5108889 | 2 | S100A8/PPARG  |
| Molecular Function | GO:0050543 | icosatetraenoic acid binding                            | 2/2321 | 7/18352 | 0.2185587 | 0.5410397 | 0.5108889 | 2 | S100A8/PPARG  |
| Molecular Function | GO:0050693 | LBD domain binding                                      | 2/2321 | 7/18352 | 0.2185587 | 0.5410397 | 0.5108889 | 2 | RXRA/PPARG    |

|                    |            |                                                                   |        |          |           |           |           |   |                                    |
|--------------------|------------|-------------------------------------------------------------------|--------|----------|-----------|-----------|-----------|---|------------------------------------|
| Molecular Function | GO:0052743 | inositol tetrakisphosphate phosphatase activity                   | 2/2321 | 7/18352  | 0.2185587 | 0.5410397 | 0.5108889 | 2 | INPP5A/INPP5D                      |
| Molecular Function | GO:0070097 | delta-catenin binding                                             | 2/2321 | 7/18352  | 0.2185587 | 0.5410397 | 0.5108889 | 2 | PTPRJ/PLEKHA7                      |
| Molecular Function | GO:0140078 | class I DNA-(apurinic or apyrimidinic site) endonuclease activity | 2/2321 | 7/18352  | 0.2185587 | 0.5410397 | 0.5108889 | 2 | NEIL3/NTHL1                        |
| Molecular Function | GO:0004715 | non-membrane spanning protein tyrosine kinase activity            | 8/2321 | 46/18352 | 0.2199113 | 0.5410397 | 0.5108889 | 8 | BAZ1B/LCK/FGR/SLA/JAK1/FER/BLK/CSK |
| Molecular Function | GO:0005068 | transmembrane receptor protein tyrosine kinase adaptor activity   | 3/2321 | 13/18352 | 0.2210708 | 0.5410397 | 0.5108889 | 3 | PIK3R1/GAB2/DOK2                   |
| Molecular Function | GO:0008417 | fucosyltransferase activity                                       | 3/2321 | 13/18352 | 0.2210708 | 0.5410397 | 0.5108889 | 3 | FUT4/FUT7/FUT11                    |
| Molecular Function | GO:0008474 | palmitoyl-(protein) hydrolase activity                            | 3/2321 | 13/18352 | 0.2210708 | 0.5410397 | 0.5108889 | 3 | ABHD16A/ABHD16B/LYPLA2             |
| Molecular Function | GO:0031434 | mitogen-activated protein kinase kinase binding                   | 3/2321 | 13/18352 | 0.2210708 | 0.5410397 | 0.5108889 | 3 | KSR1/ARRB1/TRIB1                   |
| Molecular Function | GO:0032454 | histone demethylase activity (H3-K9 specific)                     | 3/2321 | 13/18352 | 0.2210708 | 0.5410397 | 0.5108889 | 3 | KDM4B/KDM4C/KDM7A                  |

|                    |            |                                                     |         |          |           |           |           |    |                                                                 |
|--------------------|------------|-----------------------------------------------------|---------|----------|-----------|-----------|-----------|----|-----------------------------------------------------------------|
| Molecular Function | GO:0047372 | acylglycerol lipase activity                        | 3/2321  | 13/18352 | 0.2210708 | 0.5410397 | 0.5108889 | 3  | MGLL/ABHD16A/ABHD16B                                            |
| Molecular Function | GO:0061783 | peptidoglycan muralytic activity                    | 3/2321  | 13/18352 | 0.2210708 | 0.5410397 | 0.5108889 | 3  | LYG2/PGLYRP1/PGLYRP4                                            |
| Molecular Function | GO:0098599 | palmitoyl hydrolase activity                        | 3/2321  | 13/18352 | 0.2210708 | 0.5410397 | 0.5108889 | 3  | ABHD16A/ABHD16B/LYPLA2                                          |
| Molecular Function | GO:0030276 | clathrin binding                                    | 11/2321 | 67/18352 | 0.2215461 | 0.5410397 | 0.5108889 | 11 | AP2A1/ARRB1/STON1/BIN1/AP1B1/EPN2/AP1G2/DNM1L/SYT17/EPN3/CLTCL1 |
| Molecular Function | GO:0001637 | G protein-coupled chemoattractant receptor activity | 5/2321  | 26/18352 | 0.2257954 | 0.5410397 | 0.5108889 | 5  | CCR2/ACKR2/CCR9/CXCR1/CX3CR1                                    |
| Molecular Function | GO:0004435 | phosphatidylinositol phospholipase C activity       | 5/2321  | 26/18352 | 0.2257954 | 0.5410397 | 0.5108889 | 5  | CCL5/PLCB1/PLCL1/PLCG1/PLCD3                                    |
| Molecular Function | GO:0004950 | chemokine receptor activity                         | 5/2321  | 26/18352 | 0.2257954 | 0.5410397 | 0.5108889 | 5  | CCR2/ACKR2/CCR9/CXCR1/CX3CR1                                    |
| Molecular Function | GO:0016405 | CoA-ligase activity                                 | 5/2321  | 26/18352 | 0.2257954 | 0.5410397 | 0.5108889 | 5  | ACSL1/ACSS1/ACSS2/ACSF3/ACSS3                                   |
| Molecular Function | GO:0099604 | ligand-gated calcium channel activity               | 5/2321  | 26/18352 | 0.2257954 | 0.5410397 | 0.5108889 | 5  | TRPM2/ITPR2/ITPR1/RASA3/TPCN2                                   |

|                    |            |                                                                  |         |           |           |           |           |    |                                                                                                                                                                                                                                             |
|--------------------|------------|------------------------------------------------------------------|---------|-----------|-----------|-----------|-----------|----|---------------------------------------------------------------------------------------------------------------------------------------------------------------------------------------------------------------------------------------------|
| Molecular Function | GO:0008017 | microtubule binding                                              | 38/2321 | 265/18352 | 0.2259916 | 0.5410397 | 0.5108889 | 38 | S100A8/DCTN1/KIF13B/CCDC88C/NDE1/NDRG1/RAE1/KIF13A/DNM2/WHAMM/NAV3/NEFM/EML4/CCDC66/KIF21B/CCDC88B/KIF5C/HOOK2/NUMA1/DNM1/KIF1B/DNM3/MAP1A/DNM1L/ARHGEF2/DYSF/SPAG5/MX1/FBXW11/TUBGCP2/NDEL1/KIFC3/EZR/SPEF1/CEP350/CEP295NL/IRAG2/ABRAXAS1 |
| Molecular Function | GO:0051019 | mitogen-activated protein kinase binding                         | 6/2321  | 33/18352  | 0.2327455 | 0.5410397 | 0.5108889 | 6  | ATF7/NFATC1/PTPRJ/TNIP1/ARRB2/MAPKAPK3                                                                                                                                                                                                      |
| Molecular Function | GO:0072509 | divalent inorganic cation transmembrane transporter activity     | 24/2321 | 162/18352 | 0.2328884 | 0.5410397 | 0.5108889 | 24 | TRPM2/SLC39A11/ITPR2/CACNA1C/CACNA2D4/SLC24A4/SLC8A1/PKD1L1/ANXA6/ATP2B2/ITPR1/SLC11A2/TRPM6/RASA3/ATP2A3/TPCN2/TRPM3/SLC39A13/TMEM37/TMC1/CACNA1B/ATP7B/TRPV2/SLC41A1                                                                      |
| Molecular Function | GO:0016504 | peptidase activator activity                                     | 7/2321  | 40/18352  | 0.236327  | 0.5410397 | 0.5108889 | 7  | NLRC4/CTSH/APP/ATP2A3/CASP1/BCL2L13/VSIR                                                                                                                                                                                                    |
| Molecular Function | GO:0016746 | transferase activity, transferring acyl groups                   | 37/2321 | 259/18352 | 0.2368688 | 0.5410397 | 0.5108889 | 37 | PLA2G15/ZDHHC18/SPTLC2/SRCAP/LPCAT1/BRCA2/GGT1/ZDHHC14/KANSL1/TGM5/CERS6/BRD1/EPC1/ZDHHC2/TAF10/ZDHHC7/KANSL2/ALAS1/TMEM68/NCOA1/ZDHHC17/ZDHHC1/CREBBP/SAT2/CASD1/TGM3/NAA16/ABHD5/ACAT1/EPB42/HMGCS1/CPT1A/CERS2/KAT7/ASPG/AGPAT5/TLCD3B   |
| Molecular Function | GO:0000150 | recombinase activity                                             | 1/2321  | 2/18352   | 0.2369535 | 0.5410397 | 0.5108889 | 1  | DMC1                                                                                                                                                                                                                                        |
| Molecular Function | GO:0000701 | purine-specific mismatch base pair DNA N-glycosylase activity    | 1/2321  | 2/18352   | 0.2369535 | 0.5410397 | 0.5108889 | 1  | MUTYH                                                                                                                                                                                                                                       |
| Molecular Function | GO:0000703 | oxidized pyrimidine nucleobase lesion DNA N-glycosylase activity | 1/2321  | 2/18352   | 0.2369535 | 0.5410397 | 0.5108889 | 1  | NTHL1                                                                                                                                                                                                                                       |
| Molecular Function | GO:0001096 | TFIIIF-class transcription factor complex binding                | 1/2321  | 2/18352   | 0.2369535 | 0.5410397 | 0.5108889 | 1  | CTDP1                                                                                                                                                                                                                                       |



|                    |            |                                                        |        |         |           |           |           |   |         |
|--------------------|------------|--------------------------------------------------------|--------|---------|-----------|-----------|-----------|---|---------|
| Molecular Function | GO:0001729 | ceramide kinase activity                               | 1/2321 | 2/18352 | 0.2369535 | 0.5410397 | 0.5108889 | 1 | CERK    |
| Molecular Function | GO:0002058 | uracil binding                                         | 1/2321 | 2/18352 | 0.2369535 | 0.5410397 | 0.5108889 | 1 | DPYS    |
| Molecular Function | GO:0002061 | pyrimidine nucleobase binding                          | 1/2321 | 2/18352 | 0.2369535 | 0.5410397 | 0.5108889 | 1 | DPYS    |
| Molecular Function | GO:0002951 | leukotriene-C(4) hydrolase                             | 1/2321 | 2/18352 | 0.2369535 | 0.5410397 | 0.5108889 | 1 | GGT1    |
| Molecular Function | GO:0003711 | transcription elongation regulator activity            | 1/2321 | 2/18352 | 0.2369535 | 0.5410397 | 0.5108889 | 1 | WDR43   |
| Molecular Function | GO:0003826 | alpha-ketoacid dehydrogenase activity                  | 1/2321 | 2/18352 | 0.2369535 | 0.5410397 | 0.5108889 | 1 | BCKDHA  |
| Molecular Function | GO:0003835 | beta-galactoside alpha-2,6-sialyltransferase activity  | 1/2321 | 2/18352 | 0.2369535 | 0.5410397 | 0.5108889 | 1 | ST6GAL1 |
| Molecular Function | GO:0003845 | 11-beta-hydroxysteroid dehydrogenase [NAD(P)] activity | 1/2321 | 2/18352 | 0.2369535 | 0.5410397 | 0.5108889 | 1 | HSD11B2 |
| Molecular Function | GO:0003858 | 3-hydroxybutyrate dehydrogenase activity               | 1/2321 | 2/18352 | 0.2369535 | 0.5410397 | 0.5108889 | 1 | BDH1    |

|                    |            |                                                                                 |        |         |           |           |           |   |        |
|--------------------|------------|---------------------------------------------------------------------------------|--------|---------|-----------|-----------|-----------|---|--------|
| Molecular Function | GO:0003863 | 3-methyl-2-oxobutanoate dehydrogenase (2-methylpropanoyl-transferring) activity | 1/2321 | 2/18352 | 0.2369535 | 0.5410397 | 0.5108889 | 1 | BCKDHA |
| Molecular Function | GO:0003870 | 5-aminolevulinate synthase activity                                             | 1/2321 | 2/18352 | 0.2369535 | 0.5410397 | 0.5108889 | 1 | ALAS1  |
| Molecular Function | GO:0003920 | GMP reductase activity                                                          | 1/2321 | 2/18352 | 0.2369535 | 0.5410397 | 0.5108889 | 1 | GMPR2  |
| Molecular Function | GO:0003938 | IMP dehydrogenase activity                                                      | 1/2321 | 2/18352 | 0.2369535 | 0.5410397 | 0.5108889 | 1 | IMPDH1 |
| Molecular Function | GO:0003998 | acylphosphatase activity                                                        | 1/2321 | 2/18352 | 0.2369535 | 0.5410397 | 0.5108889 | 1 | ACYP2  |
| Molecular Function | GO:0004020 | adenylylsulfate kinase activity                                                 | 1/2321 | 2/18352 | 0.2369535 | 0.5410397 | 0.5108889 | 1 | PAPSS2 |
| Molecular Function | GO:0004067 | asparaginase activity                                                           | 1/2321 | 2/18352 | 0.2369535 | 0.5410397 | 0.5108889 | 1 | ASPG   |
| Molecular Function | GO:0004068 | aspartate 1-decarboxylase activity                                              | 1/2321 | 2/18352 | 0.2369535 | 0.5410397 | 0.5108889 | 1 | GADL1  |
| Molecular Function | GO:0004103 | choline kinase activity                                                         | 1/2321 | 2/18352 | 0.2369535 | 0.5410397 | 0.5108889 | 1 | CHKB   |

|                    |            |                                                                           |        |         |           |           |           |   |        |
|--------------------|------------|---------------------------------------------------------------------------|--------|---------|-----------|-----------|-----------|---|--------|
| Molecular Function | GO:0004105 | choline-phosphate<br>cytidyltransferase activity                          | 1/2321 | 2/18352 | 0.2369535 | 0.5410397 | 0.5108889 | 1 | PCYT1A |
| Molecular Function | GO:0004119 | cGMP-inhibited cyclic-<br>nucleotide<br>phosphodiesterase activity        | 1/2321 | 2/18352 | 0.2369535 | 0.5410397 | 0.5108889 | 1 | PDE3B  |
| Molecular Function | GO:0004122 | cystathionine beta-synthase<br>activity                                   | 1/2321 | 2/18352 | 0.2369535 | 0.5410397 | 0.5108889 | 1 | CBS    |
| Molecular Function | GO:0004137 | deoxycytidine kinase activity                                             | 1/2321 | 2/18352 | 0.2369535 | 0.5410397 | 0.5108889 | 1 | TK2    |
| Molecular Function | GO:0004174 | electron-transferring-<br>flavoprotein dehydrogenase<br>activity          | 1/2321 | 2/18352 | 0.2369535 | 0.5410397 | 0.5108889 | 1 | AIFM2  |
| Molecular Function | GO:0004336 | galactosylceramidase activity                                             | 1/2321 | 2/18352 | 0.2369535 | 0.5410397 | 0.5108889 | 1 | GALC   |
| Molecular Function | GO:0004360 | glutamine-fructose-6-<br>phosphate transaminase<br>(isomerizing) activity | 1/2321 | 2/18352 | 0.2369535 | 0.5410397 | 0.5108889 | 1 | GFPT2  |
| Molecular Function | GO:0004419 | hydroxymethylglutaryl-CoA<br>lyase activity                               | 1/2321 | 2/18352 | 0.2369535 | 0.5410397 | 0.5108889 | 1 | HMGCL  |
| Molecular Function | GO:0004421 | hydroxymethylglutaryl-CoA<br>synthase activity                            | 1/2321 | 2/18352 | 0.2369535 | 0.5410397 | 0.5108889 | 1 | HMGCS1 |

|                    |            |                                                     |        |         |           |           |           |   |        |
|--------------------|------------|-----------------------------------------------------|--------|---------|-----------|-----------|-----------|---|--------|
| Molecular Function | GO:0004452 | isopentenyl-diphosphate<br>delta-isomerase activity | 1/2321 | 2/18352 | 0.2369535 | 0.5410397 | 0.5108889 | 1 | IDI1   |
| Molecular Function | GO:0004478 | methionine<br>adenosyltransferase activity          | 1/2321 | 2/18352 | 0.2369535 | 0.5410397 | 0.5108889 | 1 | MAT1A  |
| Molecular Function | GO:0004586 | ornithine decarboxylase<br>activity                 | 1/2321 | 2/18352 | 0.2369535 | 0.5410397 | 0.5108889 | 1 | ODC1   |
| Molecular Function | GO:0004611 | phosphoenolpyruvate<br>carboxykinase activity       | 1/2321 | 2/18352 | 0.2369535 | 0.5410397 | 0.5108889 | 1 | PCK2   |
| Molecular Function | GO:0004613 | phosphoenolpyruvate<br>carboxykinase (GTP) activity | 1/2321 | 2/18352 | 0.2369535 | 0.5410397 | 0.5108889 | 1 | PCK2   |
| Molecular Function | GO:0004615 | phosphomannomutase<br>activity                      | 1/2321 | 2/18352 | 0.2369535 | 0.5410397 | 0.5108889 | 1 | PMM2   |
| Molecular Function | GO:0004699 | calcium-independent protein<br>kinase C activity    | 1/2321 | 2/18352 | 0.2369535 | 0.5410397 | 0.5108889 | 1 | PRKCE  |
| Molecular Function | GO:0004743 | pyruvate kinase activity                            | 1/2321 | 2/18352 | 0.2369535 | 0.5410397 | 0.5108889 | 1 | PKM    |
| Molecular Function | GO:0004779 | sulfate adenylyltransferase<br>activity             | 1/2321 | 2/18352 | 0.2369535 | 0.5410397 | 0.5108889 | 1 | PAPSS2 |

|                    |            |                                            |        |         |           |           |           |   |        |
|--------------------|------------|--------------------------------------------|--------|---------|-----------|-----------|-----------|---|--------|
| Molecular Function | GO:0004781 | sulfate adenylyltransferase (ATP) activity | 1/2321 | 2/18352 | 0.2369535 | 0.5410397 | 0.5108889 | 1 | PAPSS2 |
| Molecular Function | GO:0004782 | sulfinioalanine decarboxylase activity     | 1/2321 | 2/18352 | 0.2369535 | 0.5410397 | 0.5108889 | 1 | GADL1  |
| Molecular Function | GO:0004817 | cysteine-tRNA ligase activity              | 1/2321 | 2/18352 | 0.2369535 | 0.5410397 | 0.5108889 | 1 | CARS2  |
| Molecular Function | GO:0004818 | glutamate-tRNA ligase activity             | 1/2321 | 2/18352 | 0.2369535 | 0.5410397 | 0.5108889 | 1 | EARS2  |
| Molecular Function | GO:0004825 | methionine-tRNA ligase activity            | 1/2321 | 2/18352 | 0.2369535 | 0.5410397 | 0.5108889 | 1 | MARS1  |
| Molecular Function | GO:0004831 | tyrosine-tRNA ligase activity              | 1/2321 | 2/18352 | 0.2369535 | 0.5410397 | 0.5108889 | 1 | YARS1  |
| Molecular Function | GO:0004854 | xanthine dehydrogenase activity            | 1/2321 | 2/18352 | 0.2369535 | 0.5410397 | 0.5108889 | 1 | AOX1   |
| Molecular Function | GO:0004873 | asialoglycoprotein receptor activity       | 1/2321 | 2/18352 | 0.2369535 | 0.5410397 | 0.5108889 | 1 | ASGR2  |
| Molecular Function | GO:0004878 | complement component C5a receptor activity | 1/2321 | 2/18352 | 0.2369535 | 0.5410397 | 0.5108889 | 1 | C5AR2  |

|                    |            |                                                            |        |         |           |           |           |   |        |
|--------------------|------------|------------------------------------------------------------|--------|---------|-----------|-----------|-----------|---|--------|
| Molecular Function | GO:0004909 | interleukin-1, type I, activating receptor activity        | 1/2321 | 2/18352 | 0.2369535 | 0.5410397 | 0.5108889 | 1 | IL1R1  |
| Molecular Function | GO:0004912 | interleukin-3 receptor activity                            | 1/2321 | 2/18352 | 0.2369535 | 0.5410397 | 0.5108889 | 1 | CSF2RB |
| Molecular Function | GO:0004914 | interleukin-5 receptor activity                            | 1/2321 | 2/18352 | 0.2369535 | 0.5410397 | 0.5108889 | 1 | CSF2RB |
| Molecular Function | GO:0004915 | interleukin-6 receptor activity                            | 1/2321 | 2/18352 | 0.2369535 | 0.5410397 | 0.5108889 | 1 | IL6R   |
| Molecular Function | GO:0004918 | interleukin-8 receptor activity                            | 1/2321 | 2/18352 | 0.2369535 | 0.5410397 | 0.5108889 | 1 | CXCR1  |
| Molecular Function | GO:0005011 | macrophage colony-stimulating factor receptor activity     | 1/2321 | 2/18352 | 0.2369535 | 0.5410397 | 0.5108889 | 1 | CSF1R  |
| Molecular Function | GO:0005019 | platelet-derived growth factor beta-receptor activity      | 1/2321 | 2/18352 | 0.2369535 | 0.5410397 | 0.5108889 | 1 | PDGFRB |
| Molecular Function | GO:0005026 | transforming growth factor beta receptor activity, type II | 1/2321 | 2/18352 | 0.2369535 | 0.5410397 | 0.5108889 | 1 | TGFB2  |
| Molecular Function | GO:0005146 | leukemia inhibitory factor receptor binding                | 1/2321 | 2/18352 | 0.2369535 | 0.5410397 | 0.5108889 | 1 | LIF    |

|                    |            |                                                       |        |         |           |           |           |   |       |
|--------------------|------------|-------------------------------------------------------|--------|---------|-----------|-----------|-----------|---|-------|
| Molecular Function | GO:0005151 | interleukin-1, type II receptor binding               | 1/2321 | 2/18352 | 0.2369535 | 0.5410397 | 0.5108889 | 1 | IL1RN |
| Molecular Function | GO:0005171 | hepatocyte growth factor receptor binding             | 1/2321 | 2/18352 | 0.2369535 | 0.5410397 | 0.5108889 | 1 | ESM1  |
| Molecular Function | GO:0005174 | CD40 receptor binding                                 | 1/2321 | 2/18352 | 0.2369535 | 0.5410397 | 0.5108889 | 1 | TRAF2 |
| Molecular Function | GO:0008113 | peptide-methionine (S)-S-oxide reductase activity     | 1/2321 | 2/18352 | 0.2369535 | 0.5410397 | 0.5108889 | 1 | MSRA  |
| Molecular Function | GO:0008160 | protein tyrosine phosphatase activator activity       | 1/2321 | 2/18352 | 0.2369535 | 0.5410397 | 0.5108889 | 1 | PTPA  |
| Molecular Function | GO:0008418 | protein-N-terminal asparagine amidohydrolase activity | 1/2321 | 2/18352 | 0.2369535 | 0.5410397 | 0.5108889 | 1 | NTAN1 |
| Molecular Function | GO:0008453 | alanine-glyoxylate transaminase activity              | 1/2321 | 2/18352 | 0.2369535 | 0.5410397 | 0.5108889 | 1 | AGXT  |
| Molecular Function | GO:0008476 | protein-tyrosine sulfotransferase activity            | 1/2321 | 2/18352 | 0.2369535 | 0.5410397 | 0.5108889 | 1 | TPST1 |
| Molecular Function | GO:0008481 | sphinganine kinase activity                           | 1/2321 | 2/18352 | 0.2369535 | 0.5410397 | 0.5108889 | 1 | SPHK2 |

|                    |            |                                                             |        |         |           |           |           |   |         |
|--------------------|------------|-------------------------------------------------------------|--------|---------|-----------|-----------|-----------|---|---------|
| Molecular Function | GO:0008520 | L-ascorbate:sodium symporter activity                       | 1/2321 | 2/18352 | 0.2369535 | 0.5410397 | 0.5108889 | 1 | SLC23A1 |
| Molecular Function | GO:0008967 | phosphoglycolate phosphatase activity                       | 1/2321 | 2/18352 | 0.2369535 | 0.5410397 | 0.5108889 | 1 | PGP     |
| Molecular Function | GO:0015196 | L-tryptophan transmembrane transporter activity             | 1/2321 | 2/18352 | 0.2369535 | 0.5410397 | 0.5108889 | 1 | SLC7A5  |
| Molecular Function | GO:0015229 | L-ascorbic acid transmembrane transporter activity          | 1/2321 | 2/18352 | 0.2369535 | 0.5410397 | 0.5108889 | 1 | SLC23A1 |
| Molecular Function | GO:0015265 | urea channel activity                                       | 1/2321 | 2/18352 | 0.2369535 | 0.5410397 | 0.5108889 | 1 | AQP9    |
| Molecular Function | GO:0015350 | methotrexate transmembrane transporter activity             | 1/2321 | 2/18352 | 0.2369535 | 0.5410397 | 0.5108889 | 1 | SLC19A1 |
| Molecular Function | GO:0015382 | sodium:sulfate symporter activity                           | 1/2321 | 2/18352 | 0.2369535 | 0.5410397 | 0.5108889 | 1 | SLC13A4 |
| Molecular Function | GO:0015432 | ATPase-coupled bile acid transmembrane transporter activity | 1/2321 | 2/18352 | 0.2369535 | 0.5410397 | 0.5108889 | 1 | ABCC3   |
| Molecular Function | GO:0016206 | catechol O-methyltransferase activity                       | 1/2321 | 2/18352 | 0.2369535 | 0.5410397 | 0.5108889 | 1 | COMT    |



|                    |            |                                                                                                       |        |         |           |           |           |   |        |
|--------------------|------------|-------------------------------------------------------------------------------------------------------|--------|---------|-----------|-----------|-----------|---|--------|
| Molecular Function | GO:0016316 | phosphatidylinositol-3,4-bisphosphate 4-phosphatase activity                                          | 1/2321 | 2/18352 | 0.2369535 | 0.5410397 | 0.5108889 | 1 | INPP4A |
| Molecular Function | GO:0016608 | growth hormone-releasing hormone activity                                                             | 1/2321 | 2/18352 | 0.2369535 | 0.5410397 | 0.5108889 | 1 | GHRL   |
| Molecular Function | GO:0016649 | oxidoreductase activity, acting on the CH-NH group of donors, quinone or similar compound as acceptor | 1/2321 | 2/18352 | 0.2369535 | 0.5410397 | 0.5108889 | 1 | AIFM2  |
| Molecular Function | GO:0016657 | oxidoreductase activity, acting on NAD(P)H, nitrogenous group as acceptor                             | 1/2321 | 2/18352 | 0.2369535 | 0.5410397 | 0.5108889 | 1 | GMPR2  |
| Molecular Function | GO:0016726 | oxidoreductase activity, acting on CH or CH2 groups, NAD or NADP as acceptor                          | 1/2321 | 2/18352 | 0.2369535 | 0.5410397 | 0.5108889 | 1 | AOX1   |
| Molecular Function | GO:0016749 | N-succinyltransferase activity                                                                        | 1/2321 | 2/18352 | 0.2369535 | 0.5410397 | 0.5108889 | 1 | ALAS1  |
| Molecular Function | GO:0016807 | cysteine-type carboxypeptidase activity                                                               | 1/2321 | 2/18352 | 0.2369535 | 0.5410397 | 0.5108889 | 1 | MINDY1 |
| Molecular Function | GO:0016882 | cyclo-ligase activity                                                                                 | 1/2321 | 2/18352 | 0.2369535 | 0.5410397 | 0.5108889 | 1 | MTHFS  |
| Molecular Function | GO:0019781 | NEDD8 activating enzyme activity                                                                      | 1/2321 | 2/18352 | 0.2369535 | 0.5410397 | 0.5108889 | 1 | NAE1   |

|                    |            |                                                                                |        |         |           |           |           |   |       |
|--------------------|------------|--------------------------------------------------------------------------------|--------|---------|-----------|-----------|-----------|---|-------|
| Molecular Function | GO:0019809 | spermidine binding                                                             | 1/2321 | 2/18352 | 0.2369535 | 0.5410397 | 0.5108889 | 1 | SAT2  |
| Molecular Function | GO:0019981 | interleukin-6 binding                                                          | 1/2321 | 2/18352 | 0.2369535 | 0.5410397 | 0.5108889 | 1 | IL6R  |
| Molecular Function | GO:0023030 | MHC class Ib protein binding, via antigen binding groove                       | 1/2321 | 2/18352 | 0.2369535 | 0.5410397 | 0.5108889 | 1 | CYRIB |
| Molecular Function | GO:0030144 | alpha-1,6-mannosylglycoprotein 6-beta-N-acetylglucosaminyltransferase activity | 1/2321 | 2/18352 | 0.2369535 | 0.5410397 | 0.5108889 | 1 | MGAT5 |
| Molecular Function | GO:0030158 | protein xylosyltransferase activity                                            | 1/2321 | 2/18352 | 0.2369535 | 0.5410397 | 0.5108889 | 1 | XYLT1 |
| Molecular Function | GO:0030623 | U5 snRNA binding                                                               | 1/2321 | 2/18352 | 0.2369535 | 0.5410397 | 0.5108889 | 1 | PRPF8 |
| Molecular Function | GO:0031403 | lithium ion binding                                                            | 1/2321 | 2/18352 | 0.2369535 | 0.5410397 | 0.5108889 | 1 | PDXK  |
| Molecular Function | GO:0031711 | bradykinin receptor binding                                                    | 1/2321 | 2/18352 | 0.2369535 | 0.5410397 | 0.5108889 | 1 | AGTR1 |
| Molecular Function | GO:0031729 | CCR4 chemokine receptor binding                                                | 1/2321 | 2/18352 | 0.2369535 | 0.5410397 | 0.5108889 | 1 | CCL5  |

|                    |            |                                                                   |        |         |           |           |           |   |          |
|--------------------|------------|-------------------------------------------------------------------|--------|---------|-----------|-----------|-----------|---|----------|
| Molecular Function | GO:0031751 | D4 dopamine receptor binding                                      | 1/2321 | 2/18352 | 0.2369535 | 0.5410397 | 0.5108889 | 1 | PPP1R1B  |
| Molecular Function | GO:0031780 | corticotropin hormone receptor binding                            | 1/2321 | 2/18352 | 0.2369535 | 0.5410397 | 0.5108889 | 1 | MRAP     |
| Molecular Function | GO:0031783 | type 5 melanocortin receptor binding                              | 1/2321 | 2/18352 | 0.2369535 | 0.5410397 | 0.5108889 | 1 | MRAP     |
| Molecular Function | GO:0031799 | type 2 metabotropic glutamate receptor binding                    | 1/2321 | 2/18352 | 0.2369535 | 0.5410397 | 0.5108889 | 1 | SLC9A3R2 |
| Molecular Function | GO:0032397 | activating MHC class I receptor activity                          | 1/2321 | 2/18352 | 0.2369535 | 0.5410397 | 0.5108889 | 1 | CTSH     |
| Molecular Function | GO:0032574 | 5'-3' RNA helicase activity                                       | 1/2321 | 2/18352 | 0.2369535 | 0.5410397 | 0.5108889 | 1 | IGHMBP2  |
| Molecular Function | GO:0032810 | sterol response element binding                                   | 1/2321 | 2/18352 | 0.2369535 | 0.5410397 | 0.5108889 | 1 | SREBF1   |
| Molecular Function | GO:0033283 | ATPase-coupled organic acid transmembrane transporter activity    | 1/2321 | 2/18352 | 0.2369535 | 0.5410397 | 0.5108889 | 1 | ABCC3    |
| Molecular Function | GO:0033284 | ATPase-coupled carboxylic acid transmembrane transporter activity | 1/2321 | 2/18352 | 0.2369535 | 0.5410397 | 0.5108889 | 1 | ABCC3    |

|                    |            |                                                                       |        |         |           |           |           |   |          |
|--------------------|------------|-----------------------------------------------------------------------|--------|---------|-----------|-----------|-----------|---|----------|
| Molecular Function | GO:0033285 | ATPase-coupled monocarboxylic acid transmembrane transporter activity | 1/2321 | 2/18352 | 0.2369535 | 0.5410397 | 0.5108889 | 1 | ABCC3    |
| Molecular Function | GO:0033872 | [heparan sulfate]-glucosamine 3-sulfotransferase 3 activity           | 1/2321 | 2/18352 | 0.2369535 | 0.5410397 | 0.5108889 | 1 | HS3ST3B1 |
| Molecular Function | GO:0034039 | 8-oxo-7,8-dihydroguanine DNA N-glycosylase activity                   | 1/2321 | 2/18352 | 0.2369535 | 0.5410397 | 0.5108889 | 1 | MUTYH    |
| Molecular Function | GO:0034188 | apolipoprotein A-I receptor activity                                  | 1/2321 | 2/18352 | 0.2369535 | 0.5410397 | 0.5108889 | 1 | ABCA1    |
| Molecular Function | GO:0034988 | Fc-gamma receptor I complex binding                                   | 1/2321 | 2/18352 | 0.2369535 | 0.5410397 | 0.5108889 | 1 | FGR      |
| Molecular Function | GO:0035379 | carbon dioxide transmembrane transporter activity                     | 1/2321 | 2/18352 | 0.2369535 | 0.5410397 | 0.5108889 | 1 | AQP1     |
| Molecular Function | GO:0035575 | histone demethylase activity (H4-K20 specific)                        | 1/2321 | 2/18352 | 0.2369535 | 0.5410397 | 0.5108889 | 1 | KDM7A    |
| Molecular Function | GO:0035596 | methylthiotransferase activity                                        | 1/2321 | 2/18352 | 0.2369535 | 0.5410397 | 0.5108889 | 1 | CDKAL1   |
| Molecular Function | GO:0035717 | chemokine (C-C motif) ligand 7 binding                                | 1/2321 | 2/18352 | 0.2369535 | 0.5410397 | 0.5108889 | 1 | CCR2     |

|                    |            |                                                                      |        |         |           |           |           |   |        |
|--------------------|------------|----------------------------------------------------------------------|--------|---------|-----------|-----------|-----------|---|--------|
| Molecular Function | GO:0035718 | macrophage migration inhibitory factor binding                       | 1/2321 | 2/18352 | 0.2369535 | 0.5410397 | 0.5108889 | 1 | COP55  |
| Molecular Function | GO:0035851 | Krüppel-associated box domain binding                                | 1/2321 | 2/18352 | 0.2369535 | 0.5410397 | 0.5108889 | 1 | HDAC1  |
| Molecular Function | GO:0042007 | interleukin-18 binding                                               | 1/2321 | 2/18352 | 0.2369535 | 0.5410397 | 0.5108889 | 1 | IL18R1 |
| Molecular Function | GO:0042835 | BRE binding                                                          | 1/2321 | 2/18352 | 0.2369535 | 0.5410397 | 0.5108889 | 1 | CELF1  |
| Molecular Function | GO:0042943 | D-amino acid transmembrane transporter activity                      | 1/2321 | 2/18352 | 0.2369535 | 0.5410397 | 0.5108889 | 1 | SFXN1  |
| Molecular Function | GO:0043136 | glycerol-3-phosphatase activity                                      | 1/2321 | 2/18352 | 0.2369535 | 0.5410397 | 0.5108889 | 1 | PGP    |
| Molecular Function | GO:0043682 | copper transmembrane transporter activity, phosphorylative mechanism | 1/2321 | 2/18352 | 0.2369535 | 0.5410397 | 0.5108889 | 1 | ATP7B  |
| Molecular Function | GO:0045029 | G protein-coupled UDP receptor activity                              | 1/2321 | 2/18352 | 0.2369535 | 0.5410397 | 0.5108889 | 1 | P2RY6  |
| Molecular Function | GO:0045030 | G protein-coupled UTP receptor activity                              | 1/2321 | 2/18352 | 0.2369535 | 0.5410397 | 0.5108889 | 1 | P2RY6  |

|                    |            |                                                                   |        |         |           |           |           |   |         |
|--------------------|------------|-------------------------------------------------------------------|--------|---------|-----------|-----------|-----------|---|---------|
| Molecular Function | GO:0045523 | interleukin-27 receptor binding                                   | 1/2321 | 2/18352 | 0.2369535 | 0.5410397 | 0.5108889 | 1 | IL27    |
| Molecular Function | GO:0046811 | histone deacetylase inhibitor activity                            | 1/2321 | 2/18352 | 0.2369535 | 0.5410397 | 0.5108889 | 1 | SKI     |
| Molecular Function | GO:0047006 | 17-alpha,20-alpha-dihydroypregn-4-en-3-one dehydrogenase activity | 1/2321 | 2/18352 | 0.2369535 | 0.5410397 | 0.5108889 | 1 | HSD17B2 |
| Molecular Function | GO:0047017 | prostaglandin-F synthase activity                                 | 1/2321 | 2/18352 | 0.2369535 | 0.5410397 | 0.5108889 | 1 | PRXL2B  |
| Molecular Function | GO:0047159 | 1-alkenylglycerophosphocholine O-acyltransferase activity         | 1/2321 | 2/18352 | 0.2369535 | 0.5410397 | 0.5108889 | 1 | LPCAT1  |
| Molecular Function | GO:0047322 | [hydroxymethylglutaryl-CoA reductase (NADPH)] kinase activity     | 1/2321 | 2/18352 | 0.2369535 | 0.5410397 | 0.5108889 | 1 | PRKAA1  |
| Molecular Function | GO:0047408 | alkenylglycerophosphocholine hydrolase activity                   | 1/2321 | 2/18352 | 0.2369535 | 0.5410397 | 0.5108889 | 1 | TMEM86A |
| Molecular Function | GO:0047409 | alkenylglycerophosphoethanolamine hydrolase activity              | 1/2321 | 2/18352 | 0.2369535 | 0.5410397 | 0.5108889 | 1 | TMEM86A |
| Molecular Function | GO:0047757 | chondroitin-glucuronate 5-epimerase activity                      | 1/2321 | 2/18352 | 0.2369535 | 0.5410397 | 0.5108889 | 1 | DSE     |

|                    |            |                                                     |        |         |           |           |           |   |        |
|--------------------|------------|-----------------------------------------------------|--------|---------|-----------|-----------|-----------|---|--------|
| Molecular Function | GO:0047787 | delta4-3-oxosteroid 5beta-reductase activity        | 1/2321 | 2/18352 | 0.2369535 | 0.5410397 | 0.5108889 | 1 | AKR1D1 |
| Molecular Function | GO:0048257 | 3'-flap endonuclease activity                       | 1/2321 | 2/18352 | 0.2369535 | 0.5410397 | 0.5108889 | 1 | SLX4   |
| Molecular Function | GO:0050197 | phytanate-CoA ligase activity                       | 1/2321 | 2/18352 | 0.2369535 | 0.5410397 | 0.5108889 | 1 | ACSL1  |
| Molecular Function | GO:0050200 | plasmalogen synthase activity                       | 1/2321 | 2/18352 | 0.2369535 | 0.5410397 | 0.5108889 | 1 | LPCAT1 |
| Molecular Function | GO:0050405 | [acetyl-CoA carboxylase] kinase activity            | 1/2321 | 2/18352 | 0.2369535 | 0.5410397 | 0.5108889 | 1 | PRKAA1 |
| Molecular Function | GO:0050497 | transferase activity, transferring alkylthio groups | 1/2321 | 2/18352 | 0.2369535 | 0.5410397 | 0.5108889 | 1 | CDKAL1 |
| Molecular Function | GO:0051424 | corticotropin-releasing hormone binding             | 1/2321 | 2/18352 | 0.2369535 | 0.5410397 | 0.5108889 | 1 | CRHBP  |
| Molecular Function | GO:0051916 | granulocyte colony-stimulating factor binding       | 1/2321 | 2/18352 | 0.2369535 | 0.5410397 | 0.5108889 | 1 | CSF3R  |
| Molecular Function | GO:0061749 | forked DNA-dependent helicase activity              | 1/2321 | 2/18352 | 0.2369535 | 0.5410397 | 0.5108889 | 1 | BLM    |

|                    |            |                                                                                                       |        |         |           |           |           |   |         |
|--------------------|------------|-------------------------------------------------------------------------------------------------------|--------|---------|-----------|-----------|-----------|---|---------|
| Molecular Function | GO:0061849 | telomeric G-quadruplex DNA binding                                                                    | 1/2321 | 2/18352 | 0.2369535 | 0.5410397 | 0.5108889 | 1 | BLM     |
| Molecular Function | GO:0070052 | collagen V binding                                                                                    | 1/2321 | 2/18352 | 0.2369535 | 0.5410397 | 0.5108889 | 1 | THBS1   |
| Molecular Function | GO:0070259 | tyrosyl-DNA phosphodiesterase activity                                                                | 1/2321 | 2/18352 | 0.2369535 | 0.5410397 | 0.5108889 | 1 | TDP1    |
| Molecular Function | GO:0070853 | myosin VI binding                                                                                     | 1/2321 | 2/18352 | 0.2369535 | 0.5410397 | 0.5108889 | 1 | LMTK2   |
| Molecular Function | GO:0070890 | sodium-dependent L-ascorbate transmembrane transporter activity                                       | 1/2321 | 2/18352 | 0.2369535 | 0.5410397 | 0.5108889 | 1 | SLC23A1 |
| Molecular Function | GO:0071820 | N-box binding                                                                                         | 1/2321 | 2/18352 | 0.2369535 | 0.5410397 | 0.5108889 | 1 | HES3    |
| Molecular Function | GO:0071885 | N-terminal protein N-methyltransferase activity                                                       | 1/2321 | 2/18352 | 0.2369535 | 0.5410397 | 0.5108889 | 1 | NTMT1   |
| Molecular Function | GO:0080019 | fatty-acyl-CoA reductase (alcohol-forming) activity                                                   | 1/2321 | 2/18352 | 0.2369535 | 0.5410397 | 0.5108889 | 1 | FAR2    |
| Molecular Function | GO:0086020 | gap junction channel activity involved in SA node cell-atrial cardiac muscle cell electrical coupling | 1/2321 | 2/18352 | 0.2369535 | 0.5410397 | 0.5108889 | 1 | GJA5    |



|                    |            |                                                                                                                |        |         |           |           |           |   |         |
|--------------------|------------|----------------------------------------------------------------------------------------------------------------|--------|---------|-----------|-----------|-----------|---|---------|
| Molecular Function | GO:0086077 | gap junction channel activity involved in AV node cell-bundle of His cell electrical coupling                  | 1/2321 | 2/18352 | 0.2369535 | 0.5410397 | 0.5108889 | 1 | GJA5    |
| Molecular Function | GO:0090422 | thiamine pyrophosphate transmembrane transporter activity                                                      | 1/2321 | 2/18352 | 0.2369535 | 0.5410397 | 0.5108889 | 1 | SLC44A4 |
| Molecular Function | GO:0090556 | phosphatidylserine floppase activity                                                                           | 1/2321 | 2/18352 | 0.2369535 | 0.5410397 | 0.5108889 | 1 | ABCA1   |
| Molecular Function | GO:0090624 | endoribonuclease activity, cleaving miRNA-paired mRNA                                                          | 1/2321 | 2/18352 | 0.2369535 | 0.5410397 | 0.5108889 | 1 | AGO2    |
| Molecular Function | GO:0098633 | collagen fibril binding                                                                                        | 1/2321 | 2/18352 | 0.2369535 | 0.5410397 | 0.5108889 | 1 | TNXB    |
| Molecular Function | GO:0098680 | template-free RNA nucleotidyltransferase                                                                       | 1/2321 | 2/18352 | 0.2369535 | 0.5410397 | 0.5108889 | 1 | RMRP    |
| Molecular Function | GO:0098808 | mRNA cap binding                                                                                               | 1/2321 | 2/18352 | 0.2369535 | 0.5410397 | 0.5108889 | 1 | AGO2    |
| Molecular Function | GO:0099579 | G protein-coupled neurotransmitter receptor activity involved in regulation of postsynaptic membrane potential | 1/2321 | 2/18352 | 0.2369535 | 0.5410397 | 0.5108889 | 1 | GABBR1  |
| Molecular Function | GO:0099580 | ion antiporter activity involved in regulation of postsynaptic membrane potential                              | 1/2321 | 2/18352 | 0.2369535 | 0.5410397 | 0.5108889 | 1 | SLC8A1  |

|                    |            |                                                   |        |         |           |           |           |   |        |
|--------------------|------------|---------------------------------------------------|--------|---------|-----------|-----------|-----------|---|--------|
| Molecular Function | GO:0102084 | L-dopa O-methyltransferase activity               | 1/2321 | 2/18352 | 0.2369535 | 0.5410397 | 0.5108889 | 1 | COMT   |
| Molecular Function | GO:0102140 | heparan sulfate N-deacetylase activity            | 1/2321 | 2/18352 | 0.2369535 | 0.5410397 | 0.5108889 | 1 | NDST1  |
| Molecular Function | GO:0102193 | protein-ribulosamine 3-kinase activity            | 1/2321 | 2/18352 | 0.2369535 | 0.5410397 | 0.5108889 | 1 | FN3K   |
| Molecular Function | GO:0102773 | dihydroceramide kinase activity                   | 1/2321 | 2/18352 | 0.2369535 | 0.5410397 | 0.5108889 | 1 | CERK   |
| Molecular Function | GO:0102938 | orcinol O-methyltransferase activity              | 1/2321 | 2/18352 | 0.2369535 | 0.5410397 | 0.5108889 | 1 | COMT   |
| Molecular Function | GO:0102965 | alcohol-forming fatty acyl-CoA reductase activity | 1/2321 | 2/18352 | 0.2369535 | 0.5410397 | 0.5108889 | 1 | FAR2   |
| Molecular Function | GO:1903981 | enterobactin binding                              | 1/2321 | 2/18352 | 0.2369535 | 0.5410397 | 0.5108889 | 1 | LCN2   |
| Molecular Function | GO:1904841 | TORC2 complex binding                             | 1/2321 | 2/18352 | 0.2369535 | 0.5410397 | 0.5108889 | 1 | RPL23A |
| Molecular Function | GO:1990174 | phosphodiesterase decapping endonuclease activity | 1/2321 | 2/18352 | 0.2369535 | 0.5410397 | 0.5108889 | 1 | EDC3   |

|                    |            |                                                                                  |        |          |           |           |           |   |                                                                    |
|--------------------|------------|----------------------------------------------------------------------------------|--------|----------|-----------|-----------|-----------|---|--------------------------------------------------------------------|
| Molecular Function | GO:1990259 | histone-glutamine methyltransferase activity                                     | 1/2321 | 2/18352  | 0.2369535 | 0.5410397 | 0.5108889 | 1 | FBL                                                                |
| Molecular Function | GO:1990698 | palmitoleoyltransferase activity                                                 | 1/2321 | 2/18352  | 0.2369535 | 0.5410397 | 0.5108889 | 1 | CPT1A                                                              |
| Molecular Function | GO:1990931 | RNA N6-methyladenosine dioxygenase activity                                      | 1/2321 | 2/18352  | 0.2369535 | 0.5410397 | 0.5108889 | 1 | FTO                                                                |
| Molecular Function | GO:1990984 | tRNA demethylase activity                                                        | 1/2321 | 2/18352  | 0.2369535 | 0.5410397 | 0.5108889 | 1 | FTO                                                                |
| Molecular Function | GO:0005246 | calcium channel regulator activity                                               | 8/2321 | 47/18352 | 0.2378821 | 0.5420224 | 0.5118168 | 8 | SGK1/ITPR1/PRKCB/NRXN1/NRXN2/NPY/CABP4/STIMATE                     |
| Molecular Function | GO:0019212 | phosphatase inhibitor activity                                                   | 8/2321 | 47/18352 | 0.2378821 | 0.5420224 | 0.5118168 | 8 | LMTK2/MGAT5/PPP1R1B/URI1/CABIN1/TESC/ELFN2/PHACTR2                 |
| Molecular Function | GO:0019829 | ATPase-coupled cation transmembrane transporter activity                         | 9/2321 | 54/18352 | 0.2381397 | 0.5420417 | 0.5118351 | 9 | FXYD2/ATP8A1/ATP2B2/ATP6V1B2/ATP2A3/ATP6V0B/ATP7B/ATP6V0C/ATP6V1C1 |
| Molecular Function | GO:0016505 | peptidase activator activity involved in apoptotic process                       | 4/2321 | 20/18352 | 0.241197  | 0.5467131 | 0.5162461 | 4 | CTSH/ATP2A3/CASP1/BCL2L13                                          |
| Molecular Function | GO:0044769 | ATPase activity, coupled to transmembrane movement of ions, rotational mechanism | 4/2321 | 20/18352 | 0.241197  | 0.5467131 | 0.5162461 | 4 | ATP6V1B2/ATP6V0B/ATP6V0C/ATP6V1C1                                  |

|                    |            |                                                           |         |           |           |           |           |    |                                                                                                                                                                                                        |
|--------------------|------------|-----------------------------------------------------------|---------|-----------|-----------|-----------|-----------|----|--------------------------------------------------------------------------------------------------------------------------------------------------------------------------------------------------------|
| Molecular Function | GO:0046961 | proton-transporting ATPase activity, rotational mechanism | 4/2321  | 20/18352  | 0.241197  | 0.5467131 | 0.5162461 | 4  | ATP6V1B2/ATP6V0B/ATP6V0C/ATP6V1C1                                                                                                                                                                      |
| Molecular Function | GO:0120020 | cholesterol transfer activity                             | 4/2321  | 20/18352  | 0.241197  | 0.5467131 | 0.5162461 | 4  | ABCG1/PLTP/ABCA1/GRAMD1A                                                                                                                                                                               |
| Molecular Function | GO:0070851 | growth factor receptor binding                            | 21/2321 | 141/18352 | 0.2434099 | 0.5511551 | 0.5204405 | 21 | TGFA/IL10/TOLLIP/ERN1/IL1R1/TLR9/FRS3/APP/ESM1/IL1RN/FER/PTPRJ/PDGFD/CSF3/VAV2/ITGB3/IL6R/PDGFB/PDGFC/PDGFRB/VAV3                                                                                      |
| Molecular Function | GO:0042393 | histone binding                                           | 34/2321 | 238/18352 | 0.2480702 | 0.5611235 | 0.5298535 | 34 | BRD4/SBNO2/BAZ1B/SRCAP/TNKS/ZMYND8/MLLT10/RCC1/PHC2/USP3/UHRF1/BRD1/CDYL/SMARCA2/SPHK2/PRKCB/KMT2D/SAMD11/SFMBT2/KDM1B/MCM2/PHC3/RSF1/PHF19/USP49/KDM7A/TP53BP1/PIH1D1/CHD8/WBTC1/KAT7/ING5/PARP9/BRD2 |
| Molecular Function | GO:0051787 | misfolded protein binding                                 | 5/2321  | 27/18352  | 0.2505056 | 0.5660437 | 0.5344995 | 5  | RHBDD2/EDEM1/DERL2/CLU/F12                                                                                                                                                                             |
| Molecular Function | GO:0031072 | heat shock protein binding                                | 19/2321 | 127/18352 | 0.2507756 | 0.5660661 | 0.5345206 | 19 | KSR1/CREB1/METTL21A/FKBP5/ERN1/LMAN2/DNAJB6/HTT/IQCG/METTL22/ITGB2/ARNTL/UNC45A/NOD2/TSC2/BAG5/AHSA2P/EEF1AKMT3/PRKN                                                                                   |
| Molecular Function | GO:0048029 | monosaccharide binding                                    | 11/2321 | 69/18352  | 0.2514553 | 0.5670122 | 0.535414  | 11 | BSG/SLC2A5/HK1/LMAN2/COLEC12/HK2/ENG/P4HA2/CLN5/P3H3/P3H1                                                                                                                                              |
| Molecular Function | GO:0030170 | pyridoxal phosphate binding                               | 9/2321  | 55/18352  | 0.25529   | 0.5718049 | 0.5399396 | 9  | SPTLC2/GADL1/CBS/DDC/AGXT/ALAS1/PDXK/PDXDC1/MTARC1                                                                                                                                                     |
| Molecular Function | GO:0051287 | NAD binding                                               | 9/2321  | 55/18352  | 0.25529   | 0.5718049 | 0.5399396 | 9  | ALDH2/NDUFS2/CTBP1/HIBADH/UXS1/CTBP2/HSD11B2/SIRT3/AOX1                                                                                                                                                |

|                    |            |                                                                         |        |          |           |           |           |   |                                                       |
|--------------------|------------|-------------------------------------------------------------------------|--------|----------|-----------|-----------|-----------|---|-------------------------------------------------------|
| Molecular Function | GO:0070279 | vitamin B6 binding                                                      | 9/2321 | 55/18352 | 0.25529   | 0.5718049 | 0.5399396 | 9 | SPTLC2/GADL1/CBS/DDC/AGXT/ALAS1/PDXK/PDXDC1/MTARC1    |
| Molecular Function | GO:0030020 | extracellular matrix structural constituent conferring tensile strength | 7/2321 | 41/18352 | 0.2563622 | 0.5718049 | 0.5399396 | 7 | COL23A1/COL17A1/COL4A2/COL12A1/COL14A1/COL5A1/COL28A1 |
| Molecular Function | GO:0030159 | signaling receptor complex adaptor activity                             | 7/2321 | 41/18352 | 0.2563622 | 0.5718049 | 0.5399396 | 7 | LAT/PIK3R1/GAB2/NCK2/DEDD2/DOK2/SHANK2                |
| Molecular Function | GO:0004065 | arylsulfatase activity                                                  | 3/2321 | 14/18352 | 0.2567341 | 0.5718049 | 0.5399396 | 3 | GALNS/ARSG/ARSB                                       |
| Molecular Function | GO:0005313 | L-glutamate transmembrane transporter activity                          | 3/2321 | 14/18352 | 0.2567341 | 0.5718049 | 0.5399396 | 3 | SLC1A2/SLC1A6/SLC1A3                                  |
| Molecular Function | GO:0005372 | water transmembrane transporter activity                                | 3/2321 | 14/18352 | 0.2567341 | 0.5718049 | 0.5399396 | 3 | AQP1/AQP3/AQP9                                        |
| Molecular Function | GO:0016208 | AMP binding                                                             | 3/2321 | 14/18352 | 0.2567341 | 0.5718049 | 0.5399396 | 3 | PRKAG2/ACSS1/ACSS2                                    |
| Molecular Function | GO:0032794 | GTPase activating protein binding                                       | 3/2321 | 14/18352 | 0.2567341 | 0.5718049 | 0.5399396 | 3 | FMNL3/FMNL1/CDH1                                      |
| Molecular Function | GO:0035497 | cAMP response element binding                                           | 3/2321 | 14/18352 | 0.2567341 | 0.5718049 | 0.5399396 | 3 | CREB1/TCF12/CREB3L2                                   |

|                    |            |                                                                                |         |           |           |           |           |    |                                                                                                    |
|--------------------|------------|--------------------------------------------------------------------------------|---------|-----------|-----------|-----------|-----------|----|----------------------------------------------------------------------------------------------------|
| Molecular Function | GO:0042577 | lipid phosphatase activity                                                     | 3/2321  | 14/18352  | 0.2567341 | 0.5718049 | 0.5399396 | 3  | SGPP1/SGPP2/PLPP3                                                                                  |
| Molecular Function | GO:0031490 | chromatin DNA binding                                                          | 16/2321 | 106/18352 | 0.2623479 | 0.5837106 | 0.5511818 | 16 | RXRA/SBNO2/SMAD3/RCC1/ACTN4/ZNF276/HDAC1/RARA/GRHL2/CREBBP/MTA2/SMARCD2/PER1/NOTCH1/RELA/MACROH2A2 |
| Molecular Function | GO:0000405 | bubble DNA binding                                                             | 2/2321  | 8/18352   | 0.2683111 | 0.5844293 | 0.5518605 | 2  | BLM/NEIL3                                                                                          |
| Molecular Function | GO:0000828 | inositol hexakisphosphate kinase activity                                      | 2/2321  | 8/18352   | 0.2683111 | 0.5844293 | 0.5518605 | 2  | ITPKB/IP6K1                                                                                        |
| Molecular Function | GO:0001163 | RNA polymerase I transcription regulatory region sequence-specific DNA binding | 2/2321  | 8/18352   | 0.2683111 | 0.5844293 | 0.5518605 | 2  | TAF1C/PIH1D1                                                                                       |
| Molecular Function | GO:0001164 | RNA polymerase I core promoter sequence-specific DNA binding                   | 2/2321  | 8/18352   | 0.2683111 | 0.5844293 | 0.5518605 | 2  | TAF1C/PIH1D1                                                                                       |
| Molecular Function | GO:0004691 | cAMP-dependent protein kinase activity                                         | 2/2321  | 8/18352   | 0.2683111 | 0.5844293 | 0.5518605 | 2  | AKAP13/PRKAA1                                                                                      |
| Molecular Function | GO:0004862 | cAMP-dependent protein kinase inhibitor activity                               | 2/2321  | 8/18352   | 0.2683111 | 0.5844293 | 0.5518605 | 2  | PRKAG2/PRKAR1B                                                                                     |
| Molecular Function | GO:0005114 | type II transforming growth factor beta receptor binding                       | 2/2321  | 8/18352   | 0.2683111 | 0.5844293 | 0.5518605 | 2  | TGFB1/ENG                                                                                          |

|                    |            |                                                       |        |         |           |           |           |   |               |
|--------------------|------------|-------------------------------------------------------|--------|---------|-----------|-----------|-----------|---|---------------|
| Molecular Function | GO:0010484 | H3 histone acetyltransferase activity                 | 2/2321 | 8/18352 | 0.2683111 | 0.5844293 | 0.5518605 | 2 | BRCA2/BRD1    |
| Molecular Function | GO:0010997 | anaphase-promoting complex binding                    | 2/2321 | 8/18352 | 0.2683111 | 0.5844293 | 0.5518605 | 2 | FZR1/CLSPN    |
| Molecular Function | GO:0015205 | nucleobase transmembrane transporter activity         | 2/2321 | 8/18352 | 0.2683111 | 0.5844293 | 0.5518605 | 2 | SLC23A1/AQP9  |
| Molecular Function | GO:0016413 | O-acetyltransferase activity                          | 2/2321 | 8/18352 | 0.2683111 | 0.5844293 | 0.5518605 | 2 | LPCAT1/CASD1  |
| Molecular Function | GO:0030976 | thiamine pyrophosphate binding                        | 2/2321 | 8/18352 | 0.2683111 | 0.5844293 | 0.5518605 | 2 | DHTKD1/OGDH   |
| Molecular Function | GO:0031545 | peptidyl-proline 4-dioxygenase activity               | 2/2321 | 8/18352 | 0.2683111 | 0.5844293 | 0.5518605 | 2 | P4HB/P4HA2    |
| Molecular Function | GO:0031731 | CCR6 chemokine receptor binding                       | 2/2321 | 8/18352 | 0.2683111 | 0.5844293 | 0.5518605 | 2 | DEFB1/CCL20   |
| Molecular Function | GO:0034046 | poly(G) binding                                       | 2/2321 | 8/18352 | 0.2683111 | 0.5844293 | 0.5518605 | 2 | ATXN1/DAZAP1  |
| Molecular Function | GO:0034596 | phosphatidylinositol phosphate 4-phosphatase activity | 2/2321 | 8/18352 | 0.2683111 | 0.5844293 | 0.5518605 | 2 | INPP4A/INPP5F |

|                    |            |                                                                 |        |          |           |           |           |   |                            |
|--------------------|------------|-----------------------------------------------------------------|--------|----------|-----------|-----------|-----------|---|----------------------------|
| Molecular Function | GO:0035381 | ATP-gated ion channel activity                                  | 2/2321 | 8/18352  | 0.2683111 | 0.5844293 | 0.5518605 | 2 | P2RX1/P2RX5                |
| Molecular Function | GO:0046977 | TAP binding                                                     | 2/2321 | 8/18352  | 0.2683111 | 0.5844293 | 0.5518605 | 2 | HLA-C/HLA-F                |
| Molecular Function | GO:0050815 | phosphoserine residue binding                                   | 2/2321 | 8/18352  | 0.2683111 | 0.5844293 | 0.5518605 | 2 | SCAF8/NEDD4                |
| Molecular Function | GO:0061133 | endopeptidase activator activity                                | 2/2321 | 8/18352  | 0.2683111 | 0.5844293 | 0.5518605 | 2 | NLRC4/V SIR                |
| Molecular Function | GO:0099122 | RNA polymerase II C-terminal domain binding                     | 2/2321 | 8/18352  | 0.2683111 | 0.5844293 | 0.5518605 | 2 | BRD4/SCAF8                 |
| Molecular Function | GO:0001848 | complement binding                                              | 4/2321 | 21/18352 | 0.2704888 | 0.5868232 | 0.554121  | 4 | CALR/PHB/CD59/ITGB2        |
| Molecular Function | GO:0050145 | nucleoside monophosphate kinase activity                        | 4/2321 | 21/18352 | 0.2704888 | 0.5868232 | 0.554121  | 4 | TJP2/GUK1/AK2/AK5          |
| Molecular Function | GO:0070530 | K63-linked polyubiquitin modification-dependent protein binding | 4/2321 | 21/18352 | 0.2704888 | 0.5868232 | 0.554121  | 4 | TNFAIP3/PRPF8/WDR81/PARP10 |
| Molecular Function | GO:0120015 | sterol transfer activity                                        | 4/2321 | 21/18352 | 0.2704888 | 0.5868232 | 0.554121  | 4 | ABCG1/PLTP/ABCA1/GRAMD1A   |



|                    |            |                                                           |         |           |           |           |           |    |                                                                                                                       |
|--------------------|------------|-----------------------------------------------------------|---------|-----------|-----------|-----------|-----------|----|-----------------------------------------------------------------------------------------------------------------------|
| Molecular Function | GO:0016410 | N-acyltransferase activity                                | 16/2321 | 107/18352 | 0.274958  | 0.5948891 | 0.5617374 | 16 | SRCAP/BRCA2/KANSL1/CERS6/BRD1/EPC1/TAF10/KANSL2/ALAS1/NCOA1/CREBBP/SAT2/NAA16/CERS2/KAT7/TLCD3B                       |
| Molecular Function | GO:0015485 | cholesterol binding                                       | 8/2321  | 49/18352  | 0.2751976 | 0.5948891 | 0.5617374 | 8  | OSBPL5/ANXA6/ABCG1/OSBPL6/ABCA1/OSBPL10/NPC1/GRAMD1A                                                                  |
| Molecular Function | GO:0004629 | phospholipase C activity                                  | 5/2321  | 28/18352  | 0.275847  | 0.5948891 | 0.5617374 | 5  | CCL5/PLCB1/PLCL1/PLCG1/PLCD3                                                                                          |
| Molecular Function | GO:0004683 | calmodulin-dependent protein kinase activity              | 5/2321  | 28/18352  | 0.275847  | 0.5948891 | 0.5617374 | 5  | CAMKK2/CAMKK1/CAMK1D/MKNK1/MAPKAPK3                                                                                   |
| Molecular Function | GO:0032452 | histone demethylase activity                              | 5/2321  | 28/18352  | 0.275847  | 0.5948891 | 0.5617374 | 5  | KDM4B/KDM2A/KDM1B/KDM4C/KDM7A                                                                                         |
| Molecular Function | GO:0140457 | protein demethylase activity                              | 5/2321  | 28/18352  | 0.275847  | 0.5948891 | 0.5617374 | 5  | KDM4B/KDM2A/KDM1B/KDM4C/KDM7A                                                                                         |
| Molecular Function | GO:0051879 | Hsp90 protein binding                                     | 7/2321  | 42/18352  | 0.276866  | 0.5952627 | 0.5620901 | 7  | KSR1/ERN1/ARNTL/UNC45A/NOD2/TSC2/AHSA2P                                                                               |
| Molecular Function | GO:0001103 | RNA polymerase II repressing transcription factor binding | 6/2321  | 35/18352  | 0.2773695 | 0.5952627 | 0.5620901 | 6  | PPARG/RBPJ/TCF7L2/HDAC1/MTA1/MTA2                                                                                     |
| Molecular Function | GO:0016298 | lipase activity                                           | 19/2321 | 130/18352 | 0.2850667 | 0.5952627 | 0.5620901 | 19 | PNPLA2/PLA2G15/MGLL/PLBD2/LIPC/ABHD16A/PLD1/GPLD1/SMPDL3B/CCL5/ABHD16B/PLCB1/PLCL1/PLA1A/PLD3/PLCG1/PLCD3/ASPG/LYPLA2 |

|                    |            |                                                          |        |          |           |           |           |   |                                                             |
|--------------------|------------|----------------------------------------------------------|--------|----------|-----------|-----------|-----------|---|-------------------------------------------------------------|
| Molecular Function | GO:0050840 | extracellular matrix binding                             | 9/2321 | 57/18352 | 0.2906944 | 0.5952627 | 0.5620901 | 9 | SPOCK2/TGFB1/THBS1/ITGA2B/SPARCL1/ITGB3/PLEKHA2/LYPD5/THSD1 |
| Molecular Function | GO:0001846 | opsonin binding                                          | 3/2321 | 15/18352 | 0.2930819 | 0.5952627 | 0.5620901 | 3 | CALR/PHB/ITGB2                                              |
| Molecular Function | GO:0003841 | 1-acylglycerol-3-phosphate<br>O-acyltransferase activity | 3/2321 | 15/18352 | 0.2930819 | 0.5952627 | 0.5620901 | 3 | LPCAT1/ABHD5/AGPAT5                                         |
| Molecular Function | GO:0004029 | aldehyde dehydrogenase<br>(NAD+) activity                | 3/2321 | 15/18352 | 0.2930819 | 0.5952627 | 0.5620901 | 3 | ALDH2/ALDH4A1/ALDH1A2                                       |
| Molecular Function | GO:0004089 | carbonate dehydratase<br>activity                        | 3/2321 | 15/18352 | 0.2930819 | 0.5952627 | 0.5620901 | 3 | CA3/CA1/CA12                                                |
| Molecular Function | GO:0004953 | icosanoid receptor activity                              | 3/2321 | 15/18352 | 0.2930819 | 0.5952627 | 0.5620901 | 3 | PPARG/LTB4R2/LTB4R                                          |
| Molecular Function | GO:0005283 | amino acid:sodium<br>symporter activity                  | 3/2321 | 15/18352 | 0.2930819 | 0.5952627 | 0.5620901 | 3 | SLC1A2/SLC1A6/SLC1A3                                        |
| Molecular Function | GO:0016805 | dipeptidase activity                                     | 3/2321 | 15/18352 | 0.2930819 | 0.5952627 | 0.5620901 | 3 | CNDP2/CPQ/DPEP2                                             |
| Molecular Function | GO:0043274 | phospholipase binding                                    | 3/2321 | 15/18352 | 0.2930819 | 0.5952627 | 0.5620901 | 3 | PRKCZ/DGKQ/PRKN                                             |

|                    |            |                                                                              |        |          |           |           |           |   |                                                 |
|--------------------|------------|------------------------------------------------------------------------------|--------|----------|-----------|-----------|-----------|---|-------------------------------------------------|
| Molecular Function | GO:0070742 | C2H2 zinc finger domain binding                                              | 3/2321 | 15/18352 | 0.2930819 | 0.5952627 | 0.5620901 | 3 | EHMT2/EBF1/SRRM2                                |
| Molecular Function | GO:0008307 | structural constituent of muscle                                             | 7/2321 | 43/18352 | 0.2977641 | 0.5952627 | 0.5620901 | 7 | TTN/MYH11/MYOM1/ANKRD2/MYOT/ASPH/SMTN           |
| Molecular Function | GO:0019205 | nucleobase-containing compound kinase activity                               | 7/2321 | 43/18352 | 0.2977641 | 0.5952627 | 0.5620901 | 7 | TJP2/TK2/UCK2/GUK1/AK2/AK5/TK1                  |
| Molecular Function | GO:0019894 | kinesin binding                                                              | 7/2321 | 43/18352 | 0.2977641 | 0.5952627 | 0.5620901 | 7 | ARHGEF10/DISC1/MAPK8IP2/NEK6/KIF1B/TOR1B/KIFAP3 |
| Molecular Function | GO:0043028 | cysteine-type endopeptidase regulator activity involved in apoptotic process | 7/2321 | 43/18352 | 0.2977641 | 0.5952627 | 0.5620901 | 7 | RPS6KA1/ARRB1/CTSH/ATP2A3/NOL3/CASP1/BCL2L13    |
| Molecular Function | GO:0000062 | fatty-acyl-CoA binding                                                       | 4/2321 | 22/18352 | 0.3003432 | 0.5952627 | 0.5620901 | 4 | ACOT7/ACBD3/HMGCL/ACADVL                        |
| Molecular Function | GO:0004529 | exodeoxyribonuclease activity                                                | 4/2321 | 22/18352 | 0.3003432 | 0.5952627 | 0.5620901 | 4 | POLE/MEIOB/PLD3/ISG20                           |
| Molecular Function | GO:0009975 | cyclase activity                                                             | 4/2321 | 22/18352 | 0.3003432 | 0.5952627 | 0.5620901 | 4 | ADCY2/ADCY9/ADCY4/DGLUCY                        |
| Molecular Function | GO:0016895 | exodeoxyribonuclease activity, producing 5'-phosphomonoesters                | 4/2321 | 22/18352 | 0.3003432 | 0.5952627 | 0.5620901 | 4 | POLE/MEIOB/PLD3/ISG20                           |

|                    |            |                                                  |         |          |           |           |           |    |                                                         |
|--------------------|------------|--------------------------------------------------|---------|----------|-----------|-----------|-----------|----|---------------------------------------------------------|
| Molecular Function | GO:0051537 | 2 iron, 2 sulfur cluster binding                 | 4/2321  | 22/18352 | 0.3003432 | 0.5952627 | 0.5620901 | 4  | FECH/FDX1/GLRX2/AOX1                                    |
| Molecular Function | GO:0070717 | poly-purine tract binding                        | 5/2321  | 29/18352 | 0.3016753 | 0.5952627 | 0.5620901 | 5  | PABPC4/ATXN1/DAZAP1/RBPMS/SYPCRIP                       |
| Molecular Function | GO:0003684 | damaged DNA binding                              | 10/2321 | 65/18352 | 0.3037523 | 0.5952627 | 0.5620901 | 10 | BLM/NEIL3/UNG/CREBBP/TP53BP1/ERCC1/MUTYH/XPA/ERCC2/POL1 |
| Molecular Function | GO:0008375 | acetylglucosaminyltransferase activity           | 8/2321  | 51/18352 | 0.3139638 | 0.5952627 | 0.5620901 | 8  | HEXB/MGAT5/MGAT4A/MGAT3/B3GNT5/PIGQ/GCNT2/B3GNT2        |
| Molecular Function | GO:0003993 | acid phosphatase activity                        | 2/2321  | 9/18352  | 0.3179829 | 0.5952627 | 0.5620901 | 2  | ACP6/ACP3                                               |
| Molecular Function | GO:0004017 | adenylate kinase activity                        | 2/2321  | 9/18352  | 0.3179829 | 0.5952627 | 0.5620901 | 2  | AK2/AK5                                                 |
| Molecular Function | GO:0004385 | guanylate kinase activity                        | 2/2321  | 9/18352  | 0.3179829 | 0.5952627 | 0.5620901 | 2  | TJP2/GUK1                                               |
| Molecular Function | GO:0005225 | volume-sensitive anion channel activity          | 2/2321  | 9/18352  | 0.3179829 | 0.5952627 | 0.5620901 | 2  | LRRRC8C/LRRRC8B                                         |
| Molecular Function | GO:0005384 | manganese ion transmembrane transporter activity | 2/2321  | 9/18352  | 0.3179829 | 0.5952627 | 0.5620901 | 2  | SLC11A1/SLC11A2                                         |

|                    |            |                                                                       |        |         |           |           |           |   |                 |
|--------------------|------------|-----------------------------------------------------------------------|--------|---------|-----------|-----------|-----------|---|-----------------|
| Molecular Function | GO:0005388 | calcium transmembrane transporter activity, phosphorylative mechanism | 2/2321 | 9/18352 | 0.3179829 | 0.5952627 | 0.5620901 | 2 | ATP2B2/ATP2A3   |
| Molecular Function | GO:0005528 | FK506 binding                                                         | 2/2321 | 9/18352 | 0.3179829 | 0.5952627 | 0.5620901 | 2 | FKBP5/NFATC1    |
| Molecular Function | GO:0008046 | axon guidance receptor activity                                       | 2/2321 | 9/18352 | 0.3179829 | 0.5952627 | 0.5620901 | 2 | EPHB3/MYOT      |
| Molecular Function | GO:0008140 | cAMP response element binding protein binding                         | 2/2321 | 9/18352 | 0.3179829 | 0.5952627 | 0.5620901 | 2 | CRTC3/DAPK3     |
| Molecular Function | GO:0015180 | L-alanine transmembrane transporter activity                          | 2/2321 | 9/18352 | 0.3179829 | 0.5952627 | 0.5620901 | 2 | SLC36A3/SLC7A8  |
| Molecular Function | GO:0015183 | L-aspartate transmembrane transporter activity                        | 2/2321 | 9/18352 | 0.3179829 | 0.5952627 | 0.5620901 | 2 | SLC1A5/SLC1A6   |
| Molecular Function | GO:0015187 | glycine transmembrane transporter activity                            | 2/2321 | 9/18352 | 0.3179829 | 0.5952627 | 0.5620901 | 2 | SLC36A3/SLC7A8  |
| Molecular Function | GO:0015379 | potassium:chloride symporter activity                                 | 2/2321 | 9/18352 | 0.3179829 | 0.5952627 | 0.5620901 | 2 | SLC12A1/SLC12A7 |
| Molecular Function | GO:0016174 | NAD(P)H oxidase H2O2-forming activity                                 | 2/2321 | 9/18352 | 0.3179829 | 0.5952627 | 0.5620901 | 2 | MICAL1/MICAL2   |

|                    |            |                                                        |        |         |           |           |           |   |               |
|--------------------|------------|--------------------------------------------------------|--------|---------|-----------|-----------|-----------|---|---------------|
| Molecular Function | GO:0016427 | tRNA (cytosine)<br>methyltransferase activity          | 2/2321 | 9/18352 | 0.3179829 | 0.5952627 | 0.5620901 | 2 | METTL6/METTL8 |
| Molecular Function | GO:0019966 | interleukin-1 binding                                  | 2/2321 | 9/18352 | 0.3179829 | 0.5952627 | 0.5620901 | 2 | IL1R1/IL1RN   |
| Molecular Function | GO:0022889 | serine transmembrane<br>transporter activity           | 2/2321 | 9/18352 | 0.3179829 | 0.5952627 | 0.5620901 | 2 | SLC1A5/SFXN1  |
| Molecular Function | GO:0031628 | opioid receptor binding                                | 2/2321 | 9/18352 | 0.3179829 | 0.5952627 | 0.5620901 | 2 | PNOC/GNAO1    |
| Molecular Function | GO:0031748 | D1 dopamine receptor<br>binding                        | 2/2321 | 9/18352 | 0.3179829 | 0.5952627 | 0.5620901 | 2 | PPP1R1B/ARRB2 |
| Molecular Function | GO:0032357 | oxidized purine DNA binding                            | 2/2321 | 9/18352 | 0.3179829 | 0.5952627 | 0.5620901 | 2 | BLM/MUTYH     |
| Molecular Function | GO:0035612 | AP-2 adaptor complex<br>binding                        | 2/2321 | 9/18352 | 0.3179829 | 0.5952627 | 0.5620901 | 2 | AAK1/ARRB1    |
| Molecular Function | GO:0042609 | CD4 receptor binding                                   | 2/2321 | 9/18352 | 0.3179829 | 0.5952627 | 0.5620901 | 2 | IL16/LCK      |
| Molecular Function | GO:0043995 | histone acetyltransferase<br>activity (H4-K5 specific) | 2/2321 | 9/18352 | 0.3179829 | 0.5952627 | 0.5620901 | 2 | KANSL1/KANSL2 |

|                    |            |                                                         |         |           |           |           |           |    |                                                                                                                                                                                                              |
|--------------------|------------|---------------------------------------------------------|---------|-----------|-----------|-----------|-----------|----|--------------------------------------------------------------------------------------------------------------------------------------------------------------------------------------------------------------|
| Molecular Function | GO:0043996 | histone acetyltransferase activity (H4-K8 specific)     | 2/2321  | 9/18352   | 0.3179829 | 0.5952627 | 0.5620901 | 2  | KANSL1/KANSL2                                                                                                                                                                                                |
| Molecular Function | GO:0070567 | cytidyltransferase activity                             | 2/2321  | 9/18352   | 0.3179829 | 0.5952627 | 0.5620901 | 2  | PCYT1A/CDS2                                                                                                                                                                                                  |
| Molecular Function | GO:0004864 | protein phosphatase inhibitor activity                  | 7/2321  | 44/18352  | 0.3189814 | 0.5952627 | 0.5620901 | 7  | LMTK2/MGAT5/PPP1R1B/URI1/CABIN1/ELFN2/PHACTR2                                                                                                                                                                |
| Molecular Function | GO:0140296 | general transcription initiation factor binding         | 7/2321  | 44/18352  | 0.3189814 | 0.5952627 | 0.5620901 | 7  | RPTOR/CTDP1/BRF1/ERCC1/HHEX/RUVBL1/FBL                                                                                                                                                                       |
| Molecular Function | GO:0016247 | channel regulator activity                              | 21/2321 | 148/18352 | 0.3203218 | 0.5952627 | 0.5620901 | 21 | PRKCZ/KCNE1/KCNAB2/FXYD2/YWHAH/FXYD1/GPLD1/SGK1/ITPR1/KCNIP1/PRKCB/NRXN1/NRXN2/SNTA1/BCL2/NEDD4/SGK2/NPY/CABP4/FGF14/STIMATE                                                                                 |
| Molecular Function | GO:0004540 | ribonuclease activity                                   | 17/2321 | 118/18352 | 0.3208319 | 0.5952627 | 0.5620901 | 17 | RNASE3/EXOSC2/ERN1/CPSF3/SLFN14/RCL1/ZC3H12D/AGO2/EDC3/NOB1/ERI3/SMG6/RMRP/DIS3L2/SND1/TOE1/ISG20                                                                                                            |
| Molecular Function | GO:1901681 | sulfur compound binding                                 | 36/2321 | 262/18352 | 0.3224945 | 0.5952627 | 0.5620901 | 36 | AZU1/ELANE/CTSG/MPO/NRP2/APLP2/CRISPLD2/LIPC/COLQ/ANXA6/CBS/RCC1/THBS1/CHST15/DHTKD1/APP/OGDH/TNXB/ACOT7/PCSK6/FGFR1/PC/ADAMTSL5/TPMT/PTPRC/ACACB/MGST2/ACBD3/COL5A1/SLIT3/HMGCL/LTF/EVA1C/SLIT1/ACADVL/CCN4 |
| Molecular Function | GO:0046915 | transition metal ion transmembrane transporter activity | 6/2321  | 37/18352  | 0.3237297 | 0.5952627 | 0.5620901 | 6  | SLC25A37/SLC39A11/SLC11A1/SLC11A2/SLC39A13/ATP7B                                                                                                                                                             |
| Molecular Function | GO:0016836 | hydro-lyase activity                                    | 9/2321  | 59/18352  | 0.3272606 | 0.5952627 | 0.5620901 | 9  | ENO1/CBS/CDYL/ENOSF1/ENO3/CA3/CA1/CA12/DGLUCY                                                                                                                                                                |

|                    |            |                                                                       |        |          |           |           |           |   |                               |
|--------------------|------------|-----------------------------------------------------------------------|--------|----------|-----------|-----------|-----------|---|-------------------------------|
| Molecular Function | GO:0016878 | acid-thiol ligase activity                                            | 5/2321 | 30/18352 | 0.3278491 | 0.5952627 | 0.5620901 | 5 | ACSL1/ACSS1/ACSS2/ACSF3/ACSS3 |
| Molecular Function | GO:0000900 | translation repressor activity,<br>mRNA regulatory element<br>binding | 3/2321 | 16/18352 | 0.3297201 | 0.5952627 | 0.5620901 | 3 | RARA/CPEB3/CELF1              |
| Molecular Function | GO:0003953 | NAD <sup>+</sup> nucleosidase activity                                | 3/2321 | 16/18352 | 0.3297201 | 0.5952627 | 0.5620901 | 3 | IL1R1/IL18RAP/IL18R1          |
| Molecular Function | GO:0004030 | aldehyde dehydrogenase<br>[NAD(P) <sup>+</sup> ] activity             | 3/2321 | 16/18352 | 0.3297201 | 0.5952627 | 0.5620901 | 3 | ALDH2/ALDH4A1/ALDH1A2         |
| Molecular Function | GO:0005092 | GDP-dissociation inhibitor<br>activity                                | 3/2321 | 16/18352 | 0.3297201 | 0.5952627 | 0.5620901 | 3 | ARHGDIB/ITGB1BP1/SH3BP4       |
| Molecular Function | GO:0005149 | interleukin-1 receptor<br>binding                                     | 3/2321 | 16/18352 | 0.3297201 | 0.5952627 | 0.5620901 | 3 | TOLLIP/TLR9/IL1RN             |
| Molecular Function | GO:0005159 | insulin-like growth factor<br>receptor binding                        | 3/2321 | 16/18352 | 0.3297201 | 0.5952627 | 0.5620901 | 3 | YWHAH/PIK3R1/ARRB1            |
| Molecular Function | GO:0005523 | tropomyosin binding                                                   | 3/2321 | 16/18352 | 0.3297201 | 0.5952627 | 0.5620901 | 3 | TNNT3/TMOD3/TMOD1             |
| Molecular Function | GO:0015556 | C4-dicarboxylate<br>transmembrane transporter<br>activity             | 3/2321 | 16/18352 | 0.3297201 | 0.5952627 | 0.5620901 | 3 | SLC1A5/SLC1A6/SLC13A5         |



|                    |            |                                                 |        |          |           |           |           |   |                             |
|--------------------|------------|-------------------------------------------------|--------|----------|-----------|-----------|-----------|---|-----------------------------|
| Molecular Function | GO:0016307 | phosphatidylinositol phosphate kinase activity  | 3/2321 | 16/18352 | 0.3297201 | 0.5952627 | 0.5620901 | 3 | PIK3CD/PIP5K1B/PIP4K2A      |
| Molecular Function | GO:0017070 | U6 snRNA binding                                | 3/2321 | 16/18352 | 0.3297201 | 0.5952627 | 0.5620901 | 3 | LSM7/PRPF8/TUT1             |
| Molecular Function | GO:0050135 | NAD(P)+ nucleosidase activity                   | 3/2321 | 16/18352 | 0.3297201 | 0.5952627 | 0.5620901 | 3 | IL1R1/IL18RAP/IL18R1        |
| Molecular Function | GO:0050700 | CARD domain binding                             | 3/2321 | 16/18352 | 0.3297201 | 0.5952627 | 0.5620901 | 3 | BCL10/NOD2/CASP1            |
| Molecular Function | GO:0052742 | phosphatidylinositol kinase activity            | 3/2321 | 16/18352 | 0.3297201 | 0.5952627 | 0.5620901 | 3 | PIK3CD/PI4K2A/PI4KA         |
| Molecular Function | GO:0061809 | NAD+ nucleotidase, cyclic ADP-ribose generating | 3/2321 | 16/18352 | 0.3297201 | 0.5952627 | 0.5620901 | 3 | IL1R1/IL18RAP/IL18R1        |
| Molecular Function | GO:0016411 | acylglycerol O-acyltransferase activity         | 4/2321 | 23/18352 | 0.3305418 | 0.5952627 | 0.5620901 | 4 | PLA2G15/LPCAT1/ABHD5/AGPAT5 |
| Molecular Function | GO:0030215 | semaphorin receptor binding                     | 4/2321 | 23/18352 | 0.3305418 | 0.5952627 | 0.5620901 | 4 | SEMA6B/SEMA4A/SEMA4B/SEMA4D |
| Molecular Function | GO:0030552 | cAMP binding                                    | 4/2321 | 23/18352 | 0.3305418 | 0.5952627 | 0.5620901 | 4 | PDE4D/PRKAR1B/RAPGEF2/CNGA4 |

|                    |            |                                                                        |         |           |           |           |           |    |                                                                                                                                |
|--------------------|------------|------------------------------------------------------------------------|---------|-----------|-----------|-----------|-----------|----|--------------------------------------------------------------------------------------------------------------------------------|
| Molecular Function | GO:0034593 | phosphatidylinositol<br>bisphosphate phosphatase<br>activity           | 4/2321  | 23/18352  | 0.3305418 | 0.5952627 | 0.5620901 | 4  | SYNJ2/INPP5D/INPP4A/INPP5E                                                                                                     |
| Molecular Function | GO:0050431 | transforming growth factor<br>beta binding                             | 4/2321  | 23/18352  | 0.3305418 | 0.5952627 | 0.5620901 | 4  | LTBP1/TGFBR2/THBS1/ENG                                                                                                         |
| Molecular Function | GO:0140103 | catalytic activity, acting on a<br>glycoprotein                        | 4/2321  | 23/18352  | 0.3305418 | 0.5952627 | 0.5620901 | 4  | MGAT5/MGAT4A/MGAT3/B4GALT7                                                                                                     |
| Molecular Function | GO:0016835 | carbon-oxygen lyase activity                                           | 11/2321 | 74/18352  | 0.331424  | 0.5952627 | 0.5620901 | 11 | ENO1/NEIL3/CBS/CDYL/ENOSF1/ENO3/NTHL1/CA3/CA1/CA12/DGLUCY                                                                      |
| Molecular Function | GO:0019003 | GDP binding                                                            | 11/2321 | 74/18352  | 0.331424  | 0.5952627 | 0.5620901 | 11 | RAB2A/RAP1B/RAB5C/RAB5B/RAB31/RHEB/RAB27A/RERG/RAB40C/RALA/MIEF1                                                               |
| Molecular Function | GO:0015085 | calcium ion transmembrane<br>transporter activity                      | 19/2321 | 134/18352 | 0.333015  | 0.5952627 | 0.5620901 | 19 | TRPM2/ITPR2/CACNA1C/CACNA2D4/SLC24A4/SLC8A1/PKD1L1/ANXA6/ATP2B2/ITPR1/TRPM6/RASA3/ATP2A3/TPCN2/TRPM3/TMEM37/TMC1/CACNA1B/TRPV2 |
| Molecular Function | GO:0019209 | kinase activator activity                                              | 13/2321 | 89/18352  | 0.3333708 | 0.5952627 | 0.5620901 | 13 | RPTOR/PRKAG2/CCL5/ITSN1/WNT11/DGKQ/GHRL/CAB39/STK3/BCL10/LTF/MARK2/DAZAP2                                                      |
| Molecular Function | GO:0000309 | nicotinamide-nucleotide<br>adenyltransferase activity                  | 1/2321  | 3/18352   | 0.3334675 | 0.5952627 | 0.5620901 | 1  | NMNAT3                                                                                                                         |
| Molecular Function | GO:0001002 | RNA polymerase III type 1<br>promoter sequence-specific<br>DNA binding | 1/2321  | 3/18352   | 0.3334675 | 0.5952627 | 0.5620901 | 1  | RPTOR                                                                                                                          |

|                    |            |                                                                                         |        |         |           |           |           |   |        |
|--------------------|------------|-----------------------------------------------------------------------------------------|--------|---------|-----------|-----------|-----------|---|--------|
| Molecular Function | GO:0001003 | RNA polymerase III type 2 promoter sequence-specific DNA binding                        | 1/2321 | 3/18352 | 0.3334675 | 0.5952627 | 0.5620901 | 1 | RPTOR  |
| Molecular Function | GO:0001025 | RNA polymerase III general transcription initiation factor binding                      | 1/2321 | 3/18352 | 0.3334675 | 0.5952627 | 0.5620901 | 1 | RPTOR  |
| Molecular Function | GO:0001156 | TFIIIC-class transcription factor complex binding                                       | 1/2321 | 3/18352 | 0.3334675 | 0.5952627 | 0.5620901 | 1 | RPTOR  |
| Molecular Function | GO:0001621 | G protein-coupled ADP receptor activity                                                 | 1/2321 | 3/18352 | 0.3334675 | 0.5952627 | 0.5620901 | 1 | P2RY6  |
| Molecular Function | GO:0002060 | purine nucleobase binding                                                               | 1/2321 | 3/18352 | 0.3334675 | 0.5952627 | 0.5620901 | 1 | PNP    |
| Molecular Function | GO:0003876 | AMP deaminase activity                                                                  | 1/2321 | 3/18352 | 0.3334675 | 0.5952627 | 0.5620901 | 1 | AMPD3  |
| Molecular Function | GO:0003886 | DNA (cytosine-5-)-methyltransferase activity                                            | 1/2321 | 3/18352 | 0.3334675 | 0.5952627 | 0.5620901 | 1 | DNMT1  |
| Molecular Function | GO:0003968 | RNA-directed 5'-3' RNA polymerase activity                                              | 1/2321 | 3/18352 | 0.3334675 | 0.5952627 | 0.5620901 | 1 | RMRP   |
| Molecular Function | GO:0003976 | UDP-N-acetylglucosamine-lysosomal-enzyme N-acetylglucosaminophosphotransferase activity | 1/2321 | 3/18352 | 0.3334675 | 0.5952627 | 0.5620901 | 1 | DPAGT1 |

|                    |            |                                                                  |        |         |           |           |           |   |        |
|--------------------|------------|------------------------------------------------------------------|--------|---------|-----------|-----------|-----------|---|--------|
| Molecular Function | GO:0004031 | aldehyde oxidase activity                                        | 1/2321 | 3/18352 | 0.3334675 | 0.5952627 | 0.5620901 | 1 | AOX1   |
| Molecular Function | GO:0004142 | diacylglycerol<br>cholinephosphotransferase<br>activity          | 1/2321 | 3/18352 | 0.3334675 | 0.5952627 | 0.5620901 | 1 | CHPT1  |
| Molecular Function | GO:0004145 | diamine N-acetyltransferase<br>activity                          | 1/2321 | 3/18352 | 0.3334675 | 0.5952627 | 0.5620901 | 1 | SAT2   |
| Molecular Function | GO:0004477 | methenyltetrahydrofolate<br>cyclohydrolase activity              | 1/2321 | 3/18352 | 0.3334675 | 0.5952627 | 0.5620901 | 1 | MTHFD1 |
| Molecular Function | GO:0004486 | methylenetetrahydrofolate<br>dehydrogenase [NAD(P)+]<br>activity | 1/2321 | 3/18352 | 0.3334675 | 0.5952627 | 0.5620901 | 1 | MTHFD1 |
| Molecular Function | GO:0004487 | methylenetetrahydrofolate<br>dehydrogenase (NAD+)<br>activity    | 1/2321 | 3/18352 | 0.3334675 | 0.5952627 | 0.5620901 | 1 | MTHFD1 |
| Molecular Function | GO:0004488 | methylenetetrahydrofolate<br>dehydrogenase (NADP+)<br>activity   | 1/2321 | 3/18352 | 0.3334675 | 0.5952627 | 0.5620901 | 1 | MTHFD1 |
| Molecular Function | GO:0004558 | alpha-1,4-glucosidase activity                                   | 1/2321 | 3/18352 | 0.3334675 | 0.5952627 | 0.5620901 | 1 | MGAM   |
| Molecular Function | GO:0004605 | phosphatidate<br>cytidyltransferase activity                     | 1/2321 | 3/18352 | 0.3334675 | 0.5952627 | 0.5620901 | 1 | CDS2   |

|                    |            |                                                                                  |        |         |           |           |           |   |         |
|--------------------|------------|----------------------------------------------------------------------------------|--------|---------|-----------|-----------|-----------|---|---------|
| Molecular Function | GO:0004731 | purine-nucleoside phosphorylase activity                                         | 1/2321 | 3/18352 | 0.3334675 | 0.5952627 | 0.5620901 | 1 | PNP     |
| Molecular Function | GO:0004748 | ribonucleoside-diphosphate reductase activity, thioredoxin disulfide as acceptor | 1/2321 | 3/18352 | 0.3334675 | 0.5952627 | 0.5620901 | 1 | RRM2B   |
| Molecular Function | GO:0004768 | stearoyl-CoA 9-desaturase activity                                               | 1/2321 | 3/18352 | 0.3334675 | 0.5952627 | 0.5620901 | 1 | SCD     |
| Molecular Function | GO:0004921 | interleukin-11 receptor activity                                                 | 1/2321 | 3/18352 | 0.3334675 | 0.5952627 | 0.5620901 | 1 | IL6R    |
| Molecular Function | GO:0004949 | cannabinoid receptor activity                                                    | 1/2321 | 3/18352 | 0.3334675 | 0.5952627 | 0.5620901 | 1 | CNR2    |
| Molecular Function | GO:0004992 | platelet activating factor receptor activity                                     | 1/2321 | 3/18352 | 0.3334675 | 0.5952627 | 0.5620901 | 1 | PDGFRB  |
| Molecular Function | GO:0004999 | vasoactive intestinal polypeptide receptor activity                              | 1/2321 | 3/18352 | 0.3334675 | 0.5952627 | 0.5620901 | 1 | VIPR2   |
| Molecular Function | GO:0005017 | platelet-derived growth factor-activated receptor activity                       | 1/2321 | 3/18352 | 0.3334675 | 0.5952627 | 0.5620901 | 1 | PDGFRB  |
| Molecular Function | GO:0005094 | Rho GDP-dissociation inhibitor activity                                          | 1/2321 | 3/18352 | 0.3334675 | 0.5952627 | 0.5620901 | 1 | ARHGDI1 |

|                    |            |                                                                                |        |         |           |           |           |   |         |
|--------------------|------------|--------------------------------------------------------------------------------|--------|---------|-----------|-----------|-----------|---|---------|
| Molecular Function | GO:0005152 | interleukin-1 receptor antagonist activity                                     | 1/2321 | 3/18352 | 0.3334675 | 0.5952627 | 0.5620901 | 1 | IL1RN   |
| Molecular Function | GO:0005153 | interleukin-8 receptor binding                                                 | 1/2321 | 3/18352 | 0.3334675 | 0.5952627 | 0.5620901 | 1 | YARS1   |
| Molecular Function | GO:0005275 | amine transmembrane transporter activity                                       | 1/2321 | 3/18352 | 0.3334675 | 0.5952627 | 0.5620901 | 1 | AQP9    |
| Molecular Function | GO:0008109 | N-acetyllactosaminide beta-1,6-N-acetylglucosaminyltransferase activity        | 1/2321 | 3/18352 | 0.3334675 | 0.5952627 | 0.5620901 | 1 | GCNT2   |
| Molecular Function | GO:0008117 | sphinganine-1-phosphate aldolase activity                                      | 1/2321 | 3/18352 | 0.3334675 | 0.5952627 | 0.5620901 | 1 | PDXDC1  |
| Molecular Function | GO:0008428 | ribonuclease inhibitor activity                                                | 1/2321 | 3/18352 | 0.3334675 | 0.5952627 | 0.5620901 | 1 | RNH1    |
| Molecular Function | GO:0008454 | alpha-1,3-mannosylglycoprotein 4-beta-N-acetylglucosaminyltransferase activity | 1/2321 | 3/18352 | 0.3334675 | 0.5952627 | 0.5620901 | 1 | MGAT4A  |
| Molecular Function | GO:0008511 | sodium:potassium:chloride symporter activity                                   | 1/2321 | 3/18352 | 0.3334675 | 0.5952627 | 0.5620901 | 1 | SLC12A1 |
| Molecular Function | GO:0008597 | calcium-dependent protein serine/threonine phosphatase regulator activity      | 1/2321 | 3/18352 | 0.3334675 | 0.5952627 | 0.5620901 | 1 | RCAN1   |

|                    |            |                                                          |        |         |           |           |           |   |         |
|--------------------|------------|----------------------------------------------------------|--------|---------|-----------|-----------|-----------|---|---------|
| Molecular Function | GO:0008607 | phosphorylase kinase regulator activity                  | 1/2321 | 3/18352 | 0.3334675 | 0.5952627 | 0.5620901 | 1 | PRKAG2  |
| Molecular Function | GO:0008940 | nitrate reductase activity                               | 1/2321 | 3/18352 | 0.3334675 | 0.5952627 | 0.5620901 | 1 | MTARC1  |
| Molecular Function | GO:0009674 | potassium:sodium symporter activity                      | 1/2321 | 3/18352 | 0.3334675 | 0.5952627 | 0.5620901 | 1 | SLC12A1 |
| Molecular Function | GO:0015087 | cobalt ion transmembrane transporter activity            | 1/2321 | 3/18352 | 0.3334675 | 0.5952627 | 0.5620901 | 1 | SLC11A2 |
| Molecular Function | GO:0015119 | hexose phosphate transmembrane transporter activity      | 1/2321 | 3/18352 | 0.3334675 | 0.5952627 | 0.5620901 | 1 | SLC37A1 |
| Molecular Function | GO:0015211 | purine nucleoside transmembrane transporter activity     | 1/2321 | 3/18352 | 0.3334675 | 0.5952627 | 0.5620901 | 1 | SLC29A1 |
| Molecular Function | GO:0015226 | carnitine transmembrane transporter activity             | 1/2321 | 3/18352 | 0.3334675 | 0.5952627 | 0.5620901 | 1 | SLC22A5 |
| Molecular Function | GO:0015315 | organophosphate:inorganic phosphate antiporter activity  | 1/2321 | 3/18352 | 0.3334675 | 0.5952627 | 0.5620901 | 1 | SLC37A1 |
| Molecular Function | GO:0015526 | hexose-phosphate:inorganic phosphate antiporter activity | 1/2321 | 3/18352 | 0.3334675 | 0.5952627 | 0.5620901 | 1 | SLC37A1 |

|                    |            |                                                                                            |        |         |           |           |           |   |          |
|--------------------|------------|--------------------------------------------------------------------------------------------|--------|---------|-----------|-----------|-----------|---|----------|
| Molecular Function | GO:0015665 | alcohol transmembrane transporter activity                                                 | 1/2321 | 3/18352 | 0.3334675 | 0.5952627 | 0.5620901 | 1 | MFSD10   |
| Molecular Function | GO:0016309 | 1-phosphatidylinositol-5-phosphate 4-kinase activity                                       | 1/2321 | 3/18352 | 0.3334675 | 0.5952627 | 0.5620901 | 1 | PIP4K2A  |
| Molecular Function | GO:0016623 | oxidoreductase activity, acting on the aldehyde or oxo group of donors, oxygen as acceptor | 1/2321 | 3/18352 | 0.3334675 | 0.5952627 | 0.5620901 | 1 | AOX1     |
| Molecular Function | GO:0016728 | oxidoreductase activity, acting on CH or CH2 groups, disulfide as acceptor                 | 1/2321 | 3/18352 | 0.3334675 | 0.5952627 | 0.5620901 | 1 | RRM2B    |
| Molecular Function | GO:0016748 | succinyltransferase activity                                                               | 1/2321 | 3/18352 | 0.3334675 | 0.5952627 | 0.5620901 | 1 | ALAS1    |
| Molecular Function | GO:0016822 | hydrolase activity, acting on acid carbon-carbon bonds                                     | 1/2321 | 3/18352 | 0.3334675 | 0.5952627 | 0.5620901 | 1 | FAH      |
| Molecular Function | GO:0016823 | hydrolase activity, acting on acid carbon-carbon bonds, in ketonic substances              | 1/2321 | 3/18352 | 0.3334675 | 0.5952627 | 0.5620901 | 1 | FAH      |
| Molecular Function | GO:0017020 | myosin phosphatase regulator activity                                                      | 1/2321 | 3/18352 | 0.3334675 | 0.5952627 | 0.5620901 | 1 | PPP1R16B |
| Molecular Function | GO:0017050 | D-erythro-sphingosine kinase activity                                                      | 1/2321 | 3/18352 | 0.3334675 | 0.5952627 | 0.5620901 | 1 | SPHK2    |



|                    |            |                                                               |        |         |           |           |           |   |        |
|--------------------|------------|---------------------------------------------------------------|--------|---------|-----------|-----------|-----------|---|--------|
| Molecular Function | GO:0017099 | very-long-chain-acyl-CoA dehydrogenase activity               | 1/2321 | 3/18352 | 0.3334675 | 0.5952627 | 0.5620901 | 1 | ACADVL |
| Molecular Function | GO:0019808 | polyamine binding                                             | 1/2321 | 3/18352 | 0.3334675 | 0.5952627 | 0.5620901 | 1 | SAT2   |
| Molecular Function | GO:0019959 | interleukin-8 binding                                         | 1/2321 | 3/18352 | 0.3334675 | 0.5952627 | 0.5620901 | 1 | CXCR1  |
| Molecular Function | GO:0019970 | interleukin-11 binding                                        | 1/2321 | 3/18352 | 0.3334675 | 0.5952627 | 0.5620901 | 1 | IL6R   |
| Molecular Function | GO:0030172 | troponin C binding                                            | 1/2321 | 3/18352 | 0.3334675 | 0.5952627 | 0.5620901 | 1 | TNNT3  |
| Molecular Function | GO:0030226 | apolipoprotein receptor activity                              | 1/2321 | 3/18352 | 0.3334675 | 0.5952627 | 0.5620901 | 1 | ABCA1  |
| Molecular Function | GO:0030298 | receptor signaling protein tyrosine kinase activator activity | 1/2321 | 3/18352 | 0.3334675 | 0.5952627 | 0.5620901 | 1 | CCL5   |
| Molecular Function | GO:0030369 | ICAM-3 receptor activity                                      | 1/2321 | 3/18352 | 0.3334675 | 0.5952627 | 0.5620901 | 1 | ITGB2  |
| Molecular Function | GO:0031208 | POZ domain binding                                            | 1/2321 | 3/18352 | 0.3334675 | 0.5952627 | 0.5620901 | 1 | CUL3   |

|                    |            |                                                           |        |         |           |           |           |   |          |
|--------------------|------------|-----------------------------------------------------------|--------|---------|-----------|-----------|-----------|---|----------|
| Molecular Function | GO:0031800 | type 3 metabotropic glutamate receptor binding            | 1/2321 | 3/18352 | 0.3334675 | 0.5952627 | 0.5620901 | 1 | SLC9A3R2 |
| Molecular Function | GO:0031871 | proteinase activated receptor binding                     | 1/2321 | 3/18352 | 0.3334675 | 0.5952627 | 0.5620901 | 1 | PHB      |
| Molecular Function | GO:0031893 | vasopressin receptor binding                              | 1/2321 | 3/18352 | 0.3334675 | 0.5952627 | 0.5620901 | 1 | ARRB1    |
| Molecular Function | GO:0032450 | maltose alpha-glucosidase activity                        | 1/2321 | 3/18352 | 0.3334675 | 0.5952627 | 0.5620901 | 1 | MGAM     |
| Molecular Function | GO:0032767 | copper-dependent protein binding                          | 1/2321 | 3/18352 | 0.3334675 | 0.5952627 | 0.5620901 | 1 | ATOX1    |
| Molecular Function | GO:0034634 | glutathione transmembrane transporter activity            | 1/2321 | 3/18352 | 0.3334675 | 0.5952627 | 0.5620901 | 1 | ABCC1    |
| Molecular Function | GO:0034714 | type III transforming growth factor beta receptor binding | 1/2321 | 3/18352 | 0.3334675 | 0.5952627 | 0.5620901 | 1 | TGFB1    |
| Molecular Function | GO:0035276 | ethanol binding                                           | 1/2321 | 3/18352 | 0.3334675 | 0.5952627 | 0.5620901 | 1 | PRKCE    |
| Molecular Function | GO:0035516 | oxidative DNA demethylase activity                        | 1/2321 | 3/18352 | 0.3334675 | 0.5952627 | 0.5620901 | 1 | FTO      |

|                    |            |                                                |        |         |           |           |           |   |         |
|--------------------|------------|------------------------------------------------|--------|---------|-----------|-----------|-----------|---|---------|
| Molecular Function | GO:0035651 | AP-3 adaptor complex binding                   | 1/2321 | 3/18352 | 0.3334675 | 0.5952627 | 0.5620901 | 1 | PI4K2A  |
| Molecular Function | GO:0035877 | death effector domain binding                  | 1/2321 | 3/18352 | 0.3334675 | 0.5952627 | 0.5620901 | 1 | FADD    |
| Molecular Function | GO:0036009 | protein-glutamine N-methyltransferase activity | 1/2321 | 3/18352 | 0.3334675 | 0.5952627 | 0.5620901 | 1 | FBL     |
| Molecular Function | GO:0036132 | 13-prostaglandin reductase activity            | 1/2321 | 3/18352 | 0.3334675 | 0.5952627 | 0.5620901 | 1 | ZADH2   |
| Molecular Function | GO:0038181 | bile acid receptor activity                    | 1/2321 | 3/18352 | 0.3334675 | 0.5952627 | 0.5620901 | 1 | VDR     |
| Molecular Function | GO:0039552 | RIG-I binding                                  | 1/2321 | 3/18352 | 0.3334675 | 0.5952627 | 0.5620901 | 1 | SEC14L1 |
| Molecular Function | GO:0043734 | DNA-N1-methyladenine dioxygenase activity      | 1/2321 | 3/18352 | 0.3334675 | 0.5952627 | 0.5620901 | 1 | FTO     |
| Molecular Function | GO:0044729 | hemi-methylated DNA-binding                    | 1/2321 | 3/18352 | 0.3334675 | 0.5952627 | 0.5620901 | 1 | UHRF1   |
| Molecular Function | GO:0046623 | sphingolipid floppase activity                 | 1/2321 | 3/18352 | 0.3334675 | 0.5952627 | 0.5620901 | 1 | ABCA1   |

|                    |            |                                                                                    |        |         |           |           |           |   |            |
|--------------------|------------|------------------------------------------------------------------------------------|--------|---------|-----------|-----------|-----------|---|------------|
| Molecular Function | GO:0046979 | TAP2 binding                                                                       | 1/2321 | 3/18352 | 0.3334675 | 0.5952627 | 0.5620901 | 1 | HLA-F      |
| Molecular Function | GO:0047044 | androstan-3-alpha,17-beta-diol dehydrogenase activity                              | 1/2321 | 3/18352 | 0.3334675 | 0.5952627 | 0.5620901 | 1 | DHRS9      |
| Molecular Function | GO:0047192 | 1-alkylglycerophosphocholine O-acetyltransferase activity                          | 1/2321 | 3/18352 | 0.3334675 | 0.5952627 | 0.5620901 | 1 | LPCAT1     |
| Molecular Function | GO:0047237 | glucuronylgalactosylproteoglycan 4-beta-N-acetylgalactosaminyltransferase activity | 1/2321 | 3/18352 | 0.3334675 | 0.5952627 | 0.5620901 | 1 | CSGALNACT1 |
| Molecular Function | GO:0047522 | 15-oxoprostaglandin 13-oxidase activity                                            | 1/2321 | 3/18352 | 0.3334675 | 0.5952627 | 0.5620901 | 1 | ZADH2      |
| Molecular Function | GO:0047623 | adenosine-phosphate deaminase activity                                             | 1/2321 | 3/18352 | 0.3334675 | 0.5952627 | 0.5620901 | 1 | AMPD3      |
| Molecular Function | GO:0047756 | chondroitin 4-sulfotransferase activity                                            | 1/2321 | 3/18352 | 0.3334675 | 0.5952627 | 0.5620901 | 1 | CHST11     |
| Molecular Function | GO:0047894 | flavonol 3-sulfotransferase activity                                               | 1/2321 | 3/18352 | 0.3334675 | 0.5952627 | 0.5620901 | 1 | SULT1A2    |
| Molecular Function | GO:0050254 | rhodopsin kinase activity                                                          | 1/2321 | 3/18352 | 0.3334675 | 0.5952627 | 0.5620901 | 1 | GRK7       |

|                    |            |                                                             |        |         |           |           |           |   |         |
|--------------------|------------|-------------------------------------------------------------|--------|---------|-----------|-----------|-----------|---|---------|
| Molecular Function | GO:0050265 | RNA uridylyltransferase activity                            | 1/2321 | 3/18352 | 0.3334675 | 0.5952627 | 0.5620901 | 1 | TUT1    |
| Molecular Function | GO:0050436 | microfibril binding                                         | 1/2321 | 3/18352 | 0.3334675 | 0.5952627 | 0.5620901 | 1 | LTBP1   |
| Molecular Function | GO:0050567 | glutaminyl-tRNA synthase (glutamine-hydrolyzing) activity   | 1/2321 | 3/18352 | 0.3334675 | 0.5952627 | 0.5620901 | 1 | GATB    |
| Molecular Function | GO:0050816 | phosphothreonine residue binding                            | 1/2321 | 3/18352 | 0.3334675 | 0.5952627 | 0.5620901 | 1 | NEDD4   |
| Molecular Function | GO:0051425 | PTB domain binding                                          | 1/2321 | 3/18352 | 0.3334675 | 0.5952627 | 0.5620901 | 1 | APP     |
| Molecular Function | GO:0055077 | gap junction hemi-channel activity                          | 1/2321 | 3/18352 | 0.3334675 | 0.5952627 | 0.5620901 | 1 | GJA5    |
| Molecular Function | GO:0061513 | glucose 6-phosphate:inorganic phosphate antiporter activity | 1/2321 | 3/18352 | 0.3334675 | 0.5952627 | 0.5620901 | 1 | SLC37A1 |
| Molecular Function | GO:0061649 | ubiquitin modification-dependent histone binding            | 1/2321 | 3/18352 | 0.3334675 | 0.5952627 | 0.5620901 | 1 | TP53BP1 |
| Molecular Function | GO:0061731 | ribonucleoside-diphosphate reductase activity               | 1/2321 | 3/18352 | 0.3334675 | 0.5952627 | 0.5620901 | 1 | RRM2B   |

|                    |            |                                                                                  |        |         |           |           |           |   |         |
|--------------------|------------|----------------------------------------------------------------------------------|--------|---------|-----------|-----------|-----------|---|---------|
| Molecular Function | GO:0070026 | nitric oxide binding                                                             | 1/2321 | 3/18352 | 0.3334675 | 0.5952627 | 0.5620901 | 1 | CBS     |
| Molecular Function | GO:0070290 | N-acylphosphatidylethanolamine-specific phospholipase D activity                 | 1/2321 | 3/18352 | 0.3334675 | 0.5952627 | 0.5620901 | 1 | PLD1    |
| Molecular Function | GO:0070548 | L-glutamine aminotransferase activity                                            | 1/2321 | 3/18352 | 0.3334675 | 0.5952627 | 0.5620901 | 1 | GFPT2   |
| Molecular Function | GO:0070699 | type II activin receptor binding                                                 | 1/2321 | 3/18352 | 0.3334675 | 0.5952627 | 0.5620901 | 1 | INHBA   |
| Molecular Function | GO:0070991 | medium-chain-acyl-CoA dehydrogenase activity                                     | 1/2321 | 3/18352 | 0.3334675 | 0.5952627 | 0.5620901 | 1 | ACADM   |
| Molecular Function | GO:0071209 | U7 snRNA binding                                                                 | 1/2321 | 3/18352 | 0.3334675 | 0.5952627 | 0.5620901 | 1 | SNRPD3  |
| Molecular Function | GO:0071553 | G protein-coupled pyrimidinergic nucleotide receptor activity                    | 1/2321 | 3/18352 | 0.3334675 | 0.5952627 | 0.5620901 | 1 | P2RY6   |
| Molecular Function | GO:0080084 | 5S rDNA binding                                                                  | 1/2321 | 3/18352 | 0.3334675 | 0.5952627 | 0.5620901 | 1 | RPTOR   |
| Molecular Function | GO:0086056 | voltage-gated calcium channel activity involved in AV node cell action potential | 1/2321 | 3/18352 | 0.3334675 | 0.5952627 | 0.5620901 | 1 | CACNA1C |

|                    |            |                                                                                           |        |         |           |           |           |   |        |
|--------------------|------------|-------------------------------------------------------------------------------------------|--------|---------|-----------|-----------|-----------|---|--------|
| Molecular Function | GO:0086075 | gap junction channel activity<br>involved in cardiac<br>conduction electrical<br>coupling | 1/2321 | 3/18352 | 0.3334675 | 0.5952627 | 0.5620901 | 1 | GJA5   |
| Molecular Function | GO:0101006 | protein histidine<br>phosphatase activity                                                 | 1/2321 | 3/18352 | 0.3334675 | 0.5952627 | 0.5620901 | 1 | LHPP   |
| Molecular Function | GO:0102148 | N-acetyl-beta-D-<br>galactosaminidase activity                                            | 1/2321 | 3/18352 | 0.3334675 | 0.5952627 | 0.5620901 | 1 | HEXB   |
| Molecular Function | GO:0102485 | dATP phosphohydrolase<br>activity                                                         | 1/2321 | 3/18352 | 0.3334675 | 0.5952627 | 0.5620901 | 1 | ENTPD1 |
| Molecular Function | GO:0102486 | dCTP phosphohydrolase<br>activity                                                         | 1/2321 | 3/18352 | 0.3334675 | 0.5952627 | 0.5620901 | 1 | ENTPD1 |
| Molecular Function | GO:0102487 | dUTP phosphohydrolase<br>activity                                                         | 1/2321 | 3/18352 | 0.3334675 | 0.5952627 | 0.5620901 | 1 | ENTPD1 |
| Molecular Function | GO:0102488 | dTTP phosphohydrolase<br>activity                                                         | 1/2321 | 3/18352 | 0.3334675 | 0.5952627 | 0.5620901 | 1 | ENTPD1 |
| Molecular Function | GO:0102489 | GTP phosphohydrolase<br>activity                                                          | 1/2321 | 3/18352 | 0.3334675 | 0.5952627 | 0.5620901 | 1 | ENTPD1 |
| Molecular Function | GO:0102490 | 8-oxo-dGTP<br>phosphohydrolase activity                                                   | 1/2321 | 3/18352 | 0.3334675 | 0.5952627 | 0.5620901 | 1 | ENTPD1 |

|                    |            |                                                                                                                |        |         |           |           |           |   |        |
|--------------------|------------|----------------------------------------------------------------------------------------------------------------|--------|---------|-----------|-----------|-----------|---|--------|
| Molecular Function | GO:0102491 | dGTP phosphohydrolase activity                                                                                 | 1/2321 | 3/18352 | 0.3334675 | 0.5952627 | 0.5620901 | 1 | ENTPD1 |
| Molecular Function | GO:0106017 | phosphatidylinositol-3,4-bisphosphate phosphatase activity                                                     | 1/2321 | 3/18352 | 0.3334675 | 0.5952627 | 0.5620901 | 1 | INPP4A |
| Molecular Function | GO:0106140 | P-TEFb complex binding                                                                                         | 1/2321 | 3/18352 | 0.3334675 | 0.5952627 | 0.5620901 | 1 | BRD4   |
| Molecular Function | GO:1902271 | D3 vitamins binding                                                                                            | 1/2321 | 3/18352 | 0.3334675 | 0.5952627 | 0.5620901 | 1 | VDR    |
| Molecular Function | GO:1905056 | calcium-transporting ATPase activity involved in regulation of presynaptic cytosolic calcium ion concentration | 1/2321 | 3/18352 | 0.3334675 | 0.5952627 | 0.5620901 | 1 | ATP2B2 |
| Molecular Function | GO:1905060 | calcium:cation antiporter activity involved in regulation of postsynaptic cytosolic calcium ion concentration  | 1/2321 | 3/18352 | 0.3334675 | 0.5952627 | 0.5620901 | 1 | SLC8A1 |
| Molecular Function | GO:1905773 | 8-hydroxy-2'-deoxyguanosine DNA binding                                                                        | 1/2321 | 3/18352 | 0.3334675 | 0.5952627 | 0.5620901 | 1 | BLM    |
| Molecular Function | GO:1990444 | F-box domain binding                                                                                           | 1/2321 | 3/18352 | 0.3334675 | 0.5952627 | 0.5620901 | 1 | PRKN   |
| Molecular Function | GO:1990599 | 3' overhang single-stranded DNA endodeoxyribonuclease activity                                                 | 1/2321 | 3/18352 | 0.3334675 | 0.5952627 | 0.5620901 | 1 | ERCC1  |



|                    |            |                                                                                     |         |           |           |           |           |    |                                                                                           |
|--------------------|------------|-------------------------------------------------------------------------------------|---------|-----------|-----------|-----------|-----------|----|-------------------------------------------------------------------------------------------|
| Molecular Function | GO:0008146 | sulfotransferase activity                                                           | 8/2321  | 52/18352  | 0.3337453 | 0.5952703 | 0.5620973 | 8  | HS3ST3B1/SULT6B1/CHST11/CHST15/NDST1/CHST2/SULT1A2/TPST1                                  |
| Molecular Function | GO:0008138 | protein<br>tyrosine/serine/threonine<br>phosphatase activity                        | 7/2321  | 45/18352  | 0.3404438 | 0.6062239 | 0.5724405 | 7  | SSH1/DUSP14/DUSP22/SSH3/DUSP28/DUSP3/CDC14A                                               |
| Molecular Function | GO:0048156 | tau protein binding                                                                 | 7/2321  | 45/18352  | 0.3404438 | 0.6062239 | 0.5724405 | 7  | MARK3/DCTN1/BIN1/CLU/MAP1A/MARK2/PRKAA1                                                   |
| Molecular Function | GO:0097110 | scaffold protein binding                                                            | 9/2321  | 60/18352  | 0.3458614 | 0.6148648 | 0.5805999 | 9  | PDE4D/ITPR2/TREM1/NCK2/BAIAP2/DLL1/AKAP5/KCNQ1/KIF1B                                      |
| Molecular Function | GO:0098631 | cell adhesion mediator<br>activity                                                  | 9/2321  | 60/18352  | 0.3458614 | 0.6148648 | 0.5805999 | 9  | BSG/JUP/BAIAP2L1/CDC42EP1/BAIAP2/TMOD3/JAM3/DSCAML1/GLDN                                  |
| Molecular Function | GO:0032451 | demethylase activity                                                                | 6/2321  | 38/18352  | 0.3473126 | 0.6169407 | 0.5825601 | 6  | KDM4B/KDM2A/KDM1B/KDM4C/FTO/KDM7A                                                         |
| Molecular Function | GO:0016407 | acetyltransferase activity                                                          | 15/2321 | 105/18352 | 0.3480052 | 0.6176666 | 0.5832456 | 15 | SRCAP/LPCAT1/BRCA2/KANSL1/BRD1/EPC1/TAF10/KANSL2/NCOA1/CREBBP/SAT2/CASD1/NAA16/ACAT1/KAT7 |
| Molecular Function | GO:0072341 | modified amino acid binding                                                         | 13/2321 | 90/18352  | 0.3485272 | 0.618089  | 0.5836444 | 13 | CPNE6/OSBPL5/ANXA6/CBS/FOLR3/THBS1/MTHFS/CPNE1/ASAP1/SLC19A1/MGST2/OSBPL10/SYT17          |
| Molecular Function | GO:0009678 | pyrophosphate hydrolysis-<br>driven proton<br>transmembrane transporter<br>activity | 5/2321  | 31/18352  | 0.3542321 | 0.627184  | 0.5922326 | 5  | ATP6V1B2/ATP2A3/ATP6V0B/ATP6V0C/ATP6V1C1                                                  |

|                    |            |                                                               |         |           |           |           |           |    |                                                                                                                                         |
|--------------------|------------|---------------------------------------------------------------|---------|-----------|-----------|-----------|-----------|----|-----------------------------------------------------------------------------------------------------------------------------------------|
| Molecular Function | GO:0030291 | protein serine/threonine kinase inhibitor activity            | 5/2321  | 31/18352  | 0.3542321 | 0.627184  | 0.5922326 | 5  | RPTOR/SPRED2/PRKAG2/PRKAR1B/HEXIM1                                                                                                      |
| Molecular Function | GO:0000979 | RNA polymerase II core promoter sequence-specific DNA binding | 4/2321  | 24/18352  | 0.3608801 | 0.6354734 | 0.60006   | 4  | NRF1/HDAC1/CEBPB/RELA                                                                                                                   |
| Molecular Function | GO:0004709 | MAP kinase kinase kinase activity                             | 4/2321  | 24/18352  | 0.3608801 | 0.6354734 | 0.60006   | 4  | MAP3K3/RIPK1/MAP3K14/MAP3K20                                                                                                            |
| Molecular Function | GO:0035254 | glutamate receptor binding                                    | 7/2321  | 46/18352  | 0.3620778 | 0.6354734 | 0.60006   | 7  | AKAP5/SLC9A3R2/DNM3/SHANK2/NEDD4/PLCG1/FLOT1                                                                                            |
| Molecular Function | GO:0008194 | UDP-glycosyltransferase activity                              | 20/2321 | 144/18352 | 0.362549  | 0.6354734 | 0.60006   | 20 | CSGALNACT1/GALNT2/XXYLT1/HEXB/MGAT5/GALNT12/CHSY1/MGAT4A/MGAT3/XYLT1/GXYLT2/B4GALT7/B3GNT5/B4GALT3/GALNT9/PIGQ/GCNT2/HAS3/B3GNT2/B4GAT1 |
| Molecular Function | GO:0008484 | sulfuric ester hydrolase activity                             | 3/2321  | 17/18352  | 0.3662989 | 0.6354734 | 0.60006   | 3  | GALNS/ARSG/ARSB                                                                                                                         |
| Molecular Function | GO:0010485 | H4 histone acetyltransferase activity                         | 3/2321  | 17/18352  | 0.3662989 | 0.6354734 | 0.60006   | 3  | BRCA2/KANSL1/KANSL2                                                                                                                     |
| Molecular Function | GO:0015174 | basic amino acid transmembrane transporter activity           | 3/2321  | 17/18352  | 0.3662989 | 0.6354734 | 0.60006   | 3  | SLC15A4/SLC7A7/SLC7A1                                                                                                                   |
| Molecular Function | GO:0016854 | racemase and epimerase activity                               | 3/2321  | 17/18352  | 0.3662989 | 0.6354734 | 0.60006   | 3  | DSE/DHRS9/AMACR                                                                                                                         |

|                    |            |                                                     |        |          |           |           |         |   |                     |
|--------------------|------------|-----------------------------------------------------|--------|----------|-----------|-----------|---------|---|---------------------|
| Molecular Function | GO:0042171 | lysophosphatidic acid acyltransferase activity      | 3/2321 | 17/18352 | 0.3662989 | 0.6354734 | 0.60006 | 3 | LPCAT1/ABHD5/AGPAT5 |
| Molecular Function | GO:0000774 | adenyl-nucleotide exchange factor activity          | 2/2321 | 10/18352 | 0.366799  | 0.6354734 | 0.60006 | 2 | PFN1/BAG5           |
| Molecular Function | GO:0004690 | cyclic nucleotide-dependent protein kinase activity | 2/2321 | 10/18352 | 0.366799  | 0.6354734 | 0.60006 | 2 | AKAP13/PRKAA1       |
| Molecular Function | GO:0005031 | tumor necrosis factor-activated receptor activity   | 2/2321 | 10/18352 | 0.366799  | 0.6354734 | 0.60006 | 2 | TNFRSF1B/TNFRSF1A   |
| Molecular Function | GO:0005432 | calcium:sodium antiporter activity                  | 2/2321 | 10/18352 | 0.366799  | 0.6354734 | 0.60006 | 2 | SLC24A4/SLC8A1      |
| Molecular Function | GO:0008331 | high voltage-gated calcium channel activity         | 2/2321 | 10/18352 | 0.366799  | 0.6354734 | 0.60006 | 2 | CACNA1C/CACNA1B     |
| Molecular Function | GO:0008519 | ammonium transmembrane transporter activity         | 2/2321 | 10/18352 | 0.366799  | 0.6354734 | 0.60006 | 2 | AQP1/SLC12A7        |
| Molecular Function | GO:0008603 | cAMP-dependent protein kinase regulator activity    | 2/2321 | 10/18352 | 0.366799  | 0.6354734 | 0.60006 | 2 | PRKAG2/PRKAR1B      |
| Molecular Function | GO:0016803 | ether hydrolase activity                            | 2/2321 | 10/18352 | 0.366799  | 0.6354734 | 0.60006 | 2 | EPHX1/TMEM86A       |

|                    |            |                                                          |        |          |          |           |         |   |               |
|--------------------|------------|----------------------------------------------------------|--------|----------|----------|-----------|---------|---|---------------|
| Molecular Function | GO:0016868 | intramolecular transferase activity, phosphotransferases | 2/2321 | 10/18352 | 0.366799 | 0.6354734 | 0.60006 | 2 | PGAM1/PMM2    |
| Molecular Function | GO:0017128 | phospholipid scramblase activity                         | 2/2321 | 10/18352 | 0.366799 | 0.6354734 | 0.60006 | 2 | ANO7/ANO6     |
| Molecular Function | GO:0019203 | carbohydrate phosphatase activity                        | 2/2321 | 10/18352 | 0.366799 | 0.6354734 | 0.60006 | 2 | PFKFB4/PFKFB3 |
| Molecular Function | GO:0030957 | Tat protein binding                                      | 2/2321 | 10/18352 | 0.366799 | 0.6354734 | 0.60006 | 2 | CTDP1/DLL1    |
| Molecular Function | GO:0032356 | oxidized DNA binding                                     | 2/2321 | 10/18352 | 0.366799 | 0.6354734 | 0.60006 | 2 | BLM/MUTYH     |
| Molecular Function | GO:0045294 | alpha-catenin binding                                    | 2/2321 | 10/18352 | 0.366799 | 0.6354734 | 0.60006 | 2 | JUP/NUMB      |
| Molecular Function | GO:0046972 | histone acetyltransferase activity (H4-K16 specific)     | 2/2321 | 10/18352 | 0.366799 | 0.6354734 | 0.60006 | 2 | KANSL1/KANSL2 |
| Molecular Function | GO:0050308 | sugar-phosphatase activity                               | 2/2321 | 10/18352 | 0.366799 | 0.6354734 | 0.60006 | 2 | PFKFB4/PFKFB3 |
| Molecular Function | GO:0052740 | 1-acyl-2-lysophosphatidylserine acylhydrolase activity   | 2/2321 | 10/18352 | 0.366799 | 0.6354734 | 0.60006 | 2 | PLA2G15/LIPC  |

|                    |            |                                                                             |         |           |           |           |           |    |                                                                                                                                                                                                        |
|--------------------|------------|-----------------------------------------------------------------------------|---------|-----------|-----------|-----------|-----------|----|--------------------------------------------------------------------------------------------------------------------------------------------------------------------------------------------------------|
| Molecular Function | GO:0099528 | G protein-coupled neurotransmitter receptor activity                        | 2/2321  | 10/18352  | 0.366799  | 0.6354734 | 0.60006   | 2  | CHRM2/GABBR1                                                                                                                                                                                           |
| Molecular Function | GO:0016747 | transferase activity, transferring acyl groups other than amino-acyl groups | 31/2321 | 229/18352 | 0.3708612 | 0.6419999 | 0.6062228 | 31 | PLA2G15/ZDHHC18/SPTLC2/SRCAP/LPCAT1/BRCA2/ZDHHC14/KANSL1/CERS6/BRD1/EPC1/ZDHHC2/TAF10/ZDHHC7/KANSL2/ALAS1/NCOA1/ZDHHC17/ZDHHC1/CREBBP/SAT2/CASD1/NAA16/ABHD5/ACAT1/CPT1A/CERS2/KAT7/ASPG/AGPAT5/TLCD3B |
| Molecular Function | GO:0008080 | N-acetyltransferase activity                                                | 12/2321 | 84/18352  | 0.3724394 | 0.6437078 | 0.6078356 | 12 | SRCAP/BRCA2/KANSL1/BRD1/EPC1/TAF10/KANSL2/NCOA1/CREBBP/SAT2/NAA16/KAT7                                                                                                                                 |
| Molecular Function | GO:0042562 | hormone binding                                                             | 12/2321 | 84/18352  | 0.3724394 | 0.6437078 | 0.6078356 | 12 | CALR/PIK3R1/CTSH/IGF1R/CRHBP/GIPR/PKM/SHBG/CRYM/VIPR2/INHBA/C2CD2L                                                                                                                                     |
| Molecular Function | GO:0017069 | snRNA binding                                                               | 8/2321  | 54/18352  | 0.3738148 | 0.6450602 | 0.6091126 | 8  | SNRPD3/LSM7/PRPF8/SNRNP35/TOE1/HEXIM1/TUT1/ISG20                                                                                                                                                       |
| Molecular Function | GO:0030374 | nuclear receptor transcription coactivator activity                         | 8/2321  | 54/18352  | 0.3738148 | 0.6450602 | 0.6091126 | 8  | ACTN1/ACTN4/ZMIZ1/ENY2/PRKCB/MED13/NCOA1/NCOA2                                                                                                                                                         |
| Molecular Function | GO:0008376 | acetylgalactosaminyltransferase activity                                    | 7/2321  | 47/18352  | 0.383812  | 0.6544895 | 0.6180164 | 7  | CSGALNACT1/GALNT2/GALNT12/CHSY1/B3GNT5/GALNT9/B3GNT2                                                                                                                                                   |
| Molecular Function | GO:0048020 | CCR chemokine receptor binding                                              | 7/2321  | 47/18352  | 0.383812  | 0.6544895 | 0.6180164 | 7  | CCR2/CCL5/DEFB1/CCL20/CNIH4/CCL27/CCL22                                                                                                                                                                |
| Molecular Function | GO:0008094 | DNA-dependent ATPase activity                                               | 15/2321 | 108/18352 | 0.3906212 | 0.6544895 | 0.6180164 | 15 | BLM/RTEL1/MCM5/WRNIP1/RECQL5/IGHMBP2/SMARCA2/MCM2/SMARCAL1/CHD9/DMC1/CHD8/RUVBL1/ERCC2/FBH1                                                                                                            |

|                    |            |                                                                                                                               |         |          |           |           |           |    |                                                                       |
|--------------------|------------|-------------------------------------------------------------------------------------------------------------------------------|---------|----------|-----------|-----------|-----------|----|-----------------------------------------------------------------------|
| Molecular Function | GO:0003887 | DNA-directed DNA polymerase activity                                                                                          | 4/2321  | 25/18352 | 0.3911692 | 0.6544895 | 0.6180164 | 4  | POLE/POLD3/POLE4/POLI                                                 |
| Molecular Function | GO:0004364 | glutathione transferase activity                                                                                              | 4/2321  | 25/18352 | 0.3911692 | 0.6544895 | 0.6180164 | 4  | GSTM5/MGST2/GSTO1/GSTO2                                               |
| Molecular Function | GO:0005227 | calcium activated cation channel activity                                                                                     | 4/2321  | 25/18352 | 0.3911692 | 0.6544895 | 0.6180164 | 4  | KCNN1/TRPM3/ANO10/ANO6                                                |
| Molecular Function | GO:0016702 | oxidoreductase activity, acting on single donors with incorporation of molecular oxygen, incorporation of two atoms of oxygen | 4/2321  | 25/18352 | 0.3911692 | 0.6544895 | 0.6180164 | 4  | HGD/ADO/ADI1/P4HA2                                                    |
| Molecular Function | GO:0097602 | cullin family protein binding                                                                                                 | 4/2321  | 25/18352 | 0.3911692 | 0.6544895 | 0.6180164 | 4  | KCTD2/KLHL21/KCTD21/PRKN                                              |
| Molecular Function | GO:0120227 | acyl-CoA binding                                                                                                              | 4/2321  | 25/18352 | 0.3911692 | 0.6544895 | 0.6180164 | 4  | ACOT7/ACBD3/HMGCL/ACADVL                                              |
| Molecular Function | GO:0004521 | endoribonuclease activity                                                                                                     | 10/2321 | 70/18352 | 0.3915985 | 0.6544895 | 0.6180164 | 10 | ERN1/CPSF3/SLFN14/RCL1/ZC3H12D/AGO2/EDC3/NOB1/SMG6/SND1               |
| Molecular Function | GO:0005518 | collagen binding                                                                                                              | 10/2321 | 70/18352 | 0.3915985 | 0.6544895 | 0.6180164 | 10 | SMAD3/TGFB1/THBS1/SMAD7/SPARCL1/PDGFB/CTSB/COL14A1/AEBP1/P3H1         |
| Molecular Function | GO:0016782 | transferase activity, transferring sulfur-containing groups                                                                   | 10/2321 | 70/18352 | 0.3915985 | 0.6544895 | 0.6180164 | 10 | HS3ST3B1/SULT6B1/AMACR/CHST11/CHST15/NDST1/CHST2/SULT1A2/CDKAL1/TPST1 |

|                    |            |                                                                                       |         |           |           |           |           |    |                                                                                                                  |
|--------------------|------------|---------------------------------------------------------------------------------------|---------|-----------|-----------|-----------|-----------|----|------------------------------------------------------------------------------------------------------------------|
| Molecular Function | GO:0016776 | phosphotransferase activity, phosphate group as acceptor                              | 6/2321  | 40/18352  | 0.3948082 | 0.6544895 | 0.6180164 | 6  | TJP2/ITPKB/GUK1/AK2/AK5/IP6K1                                                                                    |
| Molecular Function | GO:0016877 | ligase activity, forming carbon-sulfur bonds                                          | 6/2321  | 40/18352  | 0.3948082 | 0.6544895 | 0.6180164 | 6  | ACSL1/ACSS1/ACSS2/ACSF3/ACSS3/NAE1                                                                               |
| Molecular Function | GO:0008569 | ATP-dependent microtubule motor activity, minus-end-directed                          | 3/2321  | 18/18352  | 0.4025138 | 0.6544895 | 0.6180164 | 3  | DNAH3/DYNC1H1/KIFC3                                                                                              |
| Molecular Function | GO:0016646 | oxidoreductase activity, acting on the CH-NH group of donors, NAD or NADP as acceptor | 3/2321  | 18/18352  | 0.4025138 | 0.6544895 | 0.6180164 | 3  | ALDH4A1/MTHFD1/CRYM                                                                                              |
| Molecular Function | GO:0017116 | single-stranded DNA helicase activity                                                 | 3/2321  | 18/18352  | 0.4025138 | 0.6544895 | 0.6180164 | 3  | MCM5/WRNIP1/MCM2                                                                                                 |
| Molecular Function | GO:0003774 | motor activity                                                                        | 18/2321 | 132/18352 | 0.4041971 | 0.6544895 | 0.6180164 | 18 | DCTN1/KIF13B/MYO18B/DNAH3/MYH11/MYO9B/KIF13A/DYNC1H1/MYH15/MYH9/DCTN2/KIF21B/MYO5A/KIF5C/KIF1B/MYO1C/DNAI2/KIFC3 |
| Molecular Function | GO:0016879 | ligase activity, forming carbon-nitrogen bonds                                        | 7/2321  | 48/18352  | 0.4055773 | 0.6544895 | 0.6180164 | 7  | MTHFD1L/MTHFS/TLL4/TLL11/MTHFD1/TLL1/GATB                                                                        |
| Molecular Function | GO:0015662 | ion transmembrane transporter activity, phosphorylative mechanism                     | 5/2321  | 33/18352  | 0.407114  | 0.6544895 | 0.6180164 | 5  | FXYD2/ATP2B2/ATP2A3/ATP7B/ATP6V1C1                                                                               |
| Molecular Function | GO:0052866 | phosphatidylinositol phosphate phosphatase activity                                   | 5/2321  | 33/18352  | 0.407114  | 0.6544895 | 0.6180164 | 5  | SYNJ2/INPP5D/INPP4A/INPP5E/INPP5F                                                                                |

|                    |            |                                                                   |         |           |           |           |           |    |                                                                                                                                                                                                                                                                                                   |
|--------------------|------------|-------------------------------------------------------------------|---------|-----------|-----------|-----------|-----------|----|---------------------------------------------------------------------------------------------------------------------------------------------------------------------------------------------------------------------------------------------------------------------------------------------------|
| Molecular Function | GO:0015631 | tubulin binding                                                   | 48/2321 | 365/18352 | 0.4086863 | 0.6544895 | 0.6180164 | 48 | S100A8/TBCD/DCTN1/KIF13B/CCDC88C/NDE1/BRCA2/NDRG1/SETD2/RAE1/KIF13A/DNM2/WHAMM/NAV3/NEFM/EML4/CCDC66/KIF21B/CCDC88B/HTT/AGBL5/KIF5C/HOOK2/TTL4/NUMA1/TLL11/DNM1/KIF1B/DNM3/MAP1A/DNM1L/TPPP3/ARHGFE2/DYSF/SPAG5/MX1/FBXW11/TUBGCP2/NDEL1/KIFC3/EZR/SPEF1/TLL1/CEP350/CEP295NL/IRAG2/PRKN/ABRAXAS1 |
| Molecular Function | GO:0005049 | nuclear export signal receptor activity                           | 2/2321  | 11/18352  | 0.4141814 | 0.6544895 | 0.6180164 | 2  | XPO7/XPO6                                                                                                                                                                                                                                                                                         |
| Molecular Function | GO:0005221 | intracellular cyclic nucleotide activated cation channel activity | 2/2321  | 11/18352  | 0.4141814 | 0.6544895 | 0.6180164 | 2  | AQP1/CNGA4                                                                                                                                                                                                                                                                                        |
| Molecular Function | GO:0005247 | voltage-gated chloride channel activity                           | 2/2321  | 11/18352  | 0.4141814 | 0.6544895 | 0.6180164 | 2  | CLCN6/ANO6                                                                                                                                                                                                                                                                                        |
| Molecular Function | GO:0005536 | glucose binding                                                   | 2/2321  | 11/18352  | 0.4141814 | 0.6544895 | 0.6180164 | 2  | HK1/HK2                                                                                                                                                                                                                                                                                           |
| Molecular Function | GO:0015368 | calcium:cation antiporter activity                                | 2/2321  | 11/18352  | 0.4141814 | 0.6544895 | 0.6180164 | 2  | SLC24A4/SLC8A1                                                                                                                                                                                                                                                                                    |
| Molecular Function | GO:0016801 | hydrolase activity, acting on ether bonds                         | 2/2321  | 11/18352  | 0.4141814 | 0.6544895 | 0.6180164 | 2  | EPHX1/TMEM86A                                                                                                                                                                                                                                                                                     |
| Molecular Function | GO:0016832 | aldehyde-lyase activity                                           | 2/2321  | 11/18352  | 0.4141814 | 0.6544895 | 0.6180164 | 2  | HOGA1/PDXDC1                                                                                                                                                                                                                                                                                      |
| Molecular Function | GO:0017166 | vinculin binding                                                  | 2/2321  | 11/18352  | 0.4141814 | 0.6544895 | 0.6180164 | 2  | ACTN1/PXN                                                                                                                                                                                                                                                                                         |



|                    |            |                                                      |        |          |           |           |           |   |               |
|--------------------|------------|------------------------------------------------------|--------|----------|-----------|-----------|-----------|---|---------------|
| Molecular Function | GO:0031996 | thioesterase binding                                 | 2/2321 | 11/18352 | 0.4141814 | 0.6544895 | 0.6180164 | 2 | TRAF2/TRAF1   |
| Molecular Function | GO:0035197 | siRNA binding                                        | 2/2321 | 11/18352 | 0.4141814 | 0.6544895 | 0.6180164 | 2 | TLR9/AGO2     |
| Molecular Function | GO:0035256 | G protein-coupled glutamate receptor binding         | 2/2321 | 11/18352 | 0.4141814 | 0.6544895 | 0.6180164 | 2 | SLC9A3R2/DNM3 |
| Molecular Function | GO:0043855 | cyclic nucleotide-gated ion channel activity         | 2/2321 | 11/18352 | 0.4141814 | 0.6544895 | 0.6180164 | 2 | AQP1/CNGA4    |
| Molecular Function | GO:0070697 | activin receptor binding                             | 2/2321 | 11/18352 | 0.4141814 | 0.6544895 | 0.6180164 | 2 | INHBA/NODAL   |
| Molecular Function | GO:0000026 | alpha-1,2-mannosyltransferase activity               | 1/2321 | 4/18352  | 0.4177784 | 0.6544895 | 0.6180164 | 1 | ALG11         |
| Molecular Function | GO:0000171 | ribonuclease MRP activity                            | 1/2321 | 4/18352  | 0.4177784 | 0.6544895 | 0.6180164 | 1 | RMRP          |
| Molecular Function | GO:0000700 | mismatch base pair DNA N-glycosylase activity        | 1/2321 | 4/18352  | 0.4177784 | 0.6544895 | 0.6180164 | 1 | MUTYH         |
| Molecular Function | GO:0000827 | inositol-1,3,4,5,6-pentakisphosphate kinase activity | 1/2321 | 4/18352  | 0.4177784 | 0.6544895 | 0.6180164 | 1 | IP6K1         |

|                    |            |                                                                        |        |         |           |           |           |   |        |
|--------------------|------------|------------------------------------------------------------------------|--------|---------|-----------|-----------|-----------|---|--------|
| Molecular Function | GO:0001515 | opioid peptide activity                                                | 1/2321 | 4/18352 | 0.4177784 | 0.6544895 | 0.6180164 | 1 | PNOC   |
| Molecular Function | GO:0001635 | calcitonin gene-related peptide receptor activity                      | 1/2321 | 4/18352 | 0.4177784 | 0.6544895 | 0.6180164 | 1 | CRCP   |
| Molecular Function | GO:0001847 | opsonin receptor activity                                              | 1/2321 | 4/18352 | 0.4177784 | 0.6544895 | 0.6180164 | 1 | C5AR2  |
| Molecular Function | GO:0003917 | DNA topoisomerase type I (single strand cut, ATP-independent) activity | 1/2321 | 4/18352 | 0.4177784 | 0.6544895 | 0.6180164 | 1 | TOP1MT |
| Molecular Function | GO:0003960 | NADPH:quinone reductase activity                                       | 1/2321 | 4/18352 | 0.4177784 | 0.6544895 | 0.6180164 | 1 | TP53I3 |
| Molecular Function | GO:0003985 | acetyl-CoA C-acetyltransferase activity                                | 1/2321 | 4/18352 | 0.4177784 | 0.6544895 | 0.6180164 | 1 | ACAT1  |
| Molecular Function | GO:0004035 | alkaline phosphatase activity                                          | 1/2321 | 4/18352 | 0.4177784 | 0.6544895 | 0.6180164 | 1 | ALPL   |
| Molecular Function | GO:0004082 | bisphosphoglycerate mutase activity                                    | 1/2321 | 4/18352 | 0.4177784 | 0.6544895 | 0.6180164 | 1 | PGAM1  |
| Molecular Function | GO:0004095 | carnitine O-palmitoyltransferase activity                              | 1/2321 | 4/18352 | 0.4177784 | 0.6544895 | 0.6180164 | 1 | CPT1A  |

|                    |            |                                                  |        |         |           |           |           |   |        |
|--------------------|------------|--------------------------------------------------|--------|---------|-----------|-----------|-----------|---|--------|
| Molecular Function | GO:0004096 | catalase activity                                | 1/2321 | 4/18352 | 0.4177784 | 0.6544895 | 0.6180164 | 1 | CAT    |
| Molecular Function | GO:0004427 | inorganic diphosphatase activity                 | 1/2321 | 4/18352 | 0.4177784 | 0.6544895 | 0.6180164 | 1 | LHPP   |
| Molecular Function | GO:0004466 | long-chain-acyl-CoA dehydrogenase activity       | 1/2321 | 4/18352 | 0.4177784 | 0.6544895 | 0.6180164 | 1 | ACADVL |
| Molecular Function | GO:0004515 | nicotinate-nucleotide adenyltransferase activity | 1/2321 | 4/18352 | 0.4177784 | 0.6544895 | 0.6180164 | 1 | NMNAT3 |
| Molecular Function | GO:0004568 | chitinase activity                               | 1/2321 | 4/18352 | 0.4177784 | 0.6544895 | 0.6180164 | 1 | CHIT1  |
| Molecular Function | GO:0004619 | phosphoglycerate mutase activity                 | 1/2321 | 4/18352 | 0.4177784 | 0.6544895 | 0.6180164 | 1 | PGAM1  |
| Molecular Function | GO:0004687 | myosin light chain kinase activity               | 1/2321 | 4/18352 | 0.4177784 | 0.6544895 | 0.6180164 | 1 | MYLK   |
| Molecular Function | GO:0004844 | uracil DNA N-glycosylase activity                | 1/2321 | 4/18352 | 0.4177784 | 0.6544895 | 0.6180164 | 1 | UNG    |
| Molecular Function | GO:0004849 | uridine kinase activity                          | 1/2321 | 4/18352 | 0.4177784 | 0.6544895 | 0.6180164 | 1 | UCK2   |

|                    |            |                                                          |        |         |           |           |           |   |         |
|--------------------|------------|----------------------------------------------------------|--------|---------|-----------|-----------|-----------|---|---------|
| Molecular Function | GO:0005087 | Ran guanyl-nucleotide exchange factor activity           | 1/2321 | 4/18352 | 0.4177784 | 0.6544895 | 0.6180164 | 1 | RCC1    |
| Molecular Function | GO:0005173 | stem cell factor receptor binding                        | 1/2321 | 4/18352 | 0.4177784 | 0.6544895 | 0.6180164 | 1 | SPRED2  |
| Molecular Function | GO:0005280 | amino acid:proton symporter activity                     | 1/2321 | 4/18352 | 0.4177784 | 0.6544895 | 0.6180164 | 1 | SLC36A3 |
| Molecular Function | GO:0005350 | pyrimidine nucleobase transmembrane transporter activity | 1/2321 | 4/18352 | 0.4177784 | 0.6544895 | 0.6180164 | 1 | AQP9    |
| Molecular Function | GO:0005353 | fructose transmembrane transporter activity              | 1/2321 | 4/18352 | 0.4177784 | 0.6544895 | 0.6180164 | 1 | SLC2A5  |
| Molecular Function | GO:0005497 | androgen binding                                         | 1/2321 | 4/18352 | 0.4177784 | 0.6544895 | 0.6180164 | 1 | SHBG    |
| Molecular Function | GO:0008440 | inositol-1,4,5-trisphosphate 3-kinase activity           | 1/2321 | 4/18352 | 0.4177784 | 0.6544895 | 0.6180164 | 1 | ITPKB   |
| Molecular Function | GO:0008506 | sucrose:proton symporter activity                        | 1/2321 | 4/18352 | 0.4177784 | 0.6544895 | 0.6180164 | 1 | SLC45A4 |
| Molecular Function | GO:0008515 | sucrose transmembrane transporter activity               | 1/2321 | 4/18352 | 0.4177784 | 0.6544895 | 0.6180164 | 1 | SLC45A4 |

|                    |            |                                                                |        |         |           |           |           |   |         |
|--------------------|------------|----------------------------------------------------------------|--------|---------|-----------|-----------|-----------|---|---------|
| Molecular Function | GO:0008517 | folic acid transmembrane transporter activity                  | 1/2321 | 4/18352 | 0.4177784 | 0.6544895 | 0.6180164 | 1 | SLC19A1 |
| Molecular Function | GO:0009669 | sucrose:cation symporter activity                              | 1/2321 | 4/18352 | 0.4177784 | 0.6544895 | 0.6180164 | 1 | SLC45A4 |
| Molecular Function | GO:0015016 | [heparan sulfate]-glucosamine N-sulfotransferase activity      | 1/2321 | 4/18352 | 0.4177784 | 0.6544895 | 0.6180164 | 1 | NDST1   |
| Molecular Function | GO:0015093 | ferrous iron transmembrane transporter activity                | 1/2321 | 4/18352 | 0.4177784 | 0.6544895 | 0.6180164 | 1 | SLC11A2 |
| Molecular Function | GO:0015143 | urate transmembrane transporter activity                       | 1/2321 | 4/18352 | 0.4177784 | 0.6544895 | 0.6180164 | 1 | SLC2A9  |
| Molecular Function | GO:0015154 | disaccharide transmembrane transporter activity                | 1/2321 | 4/18352 | 0.4177784 | 0.6544895 | 0.6180164 | 1 | SLC45A4 |
| Molecular Function | GO:0015157 | oligosaccharide transmembrane transporter activity             | 1/2321 | 4/18352 | 0.4177784 | 0.6544895 | 0.6180164 | 1 | SLC45A4 |
| Molecular Function | GO:0016215 | acyl-CoA desaturase activity                                   | 1/2321 | 4/18352 | 0.4177784 | 0.6544895 | 0.6180164 | 1 | SCD     |
| Molecular Function | GO:0016286 | small conductance calcium-activated potassium channel activity | 1/2321 | 4/18352 | 0.4177784 | 0.6544895 | 0.6180164 | 1 | KCNN1   |

|                    |            |                                                                                                       |        |         |           |           |           |   |        |
|--------------------|------------|-------------------------------------------------------------------------------------------------------|--------|---------|-----------|-----------|-----------|---|--------|
| Molecular Function | GO:0016401 | palmitoyl-CoA oxidase activity                                                                        | 1/2321 | 4/18352 | 0.4177784 | 0.6544895 | 0.6180164 | 1 | ACOX2  |
| Molecular Function | GO:0016531 | copper chaperone activity                                                                             | 1/2321 | 4/18352 | 0.4177784 | 0.6544895 | 0.6180164 | 1 | ATOX1  |
| Molecular Function | GO:0016635 | oxidoreductase activity, acting on the CH-CH group of donors, quinone or related compound as acceptor | 1/2321 | 4/18352 | 0.4177784 | 0.6544895 | 0.6180164 | 1 | DHODH  |
| Molecular Function | GO:0017018 | myosin phosphatase activity                                                                           | 1/2321 | 4/18352 | 0.4177784 | 0.6544895 | 0.6180164 | 1 | PPP1CB |
| Molecular Function | GO:0017150 | tRNA dihydrouridine synthase activity                                                                 | 1/2321 | 4/18352 | 0.4177784 | 0.6544895 | 0.6180164 | 1 | DUS2   |
| Molecular Function | GO:0023025 | MHC class Ib protein complex binding                                                                  | 1/2321 | 4/18352 | 0.4177784 | 0.6544895 | 0.6180164 | 1 | CYRIB  |
| Molecular Function | GO:0030151 | molybdenum ion binding                                                                                | 1/2321 | 4/18352 | 0.4177784 | 0.6544895 | 0.6180164 | 1 | MTARC1 |
| Molecular Function | GO:0030160 | synaptic receptor adaptor activity                                                                    | 1/2321 | 4/18352 | 0.4177784 | 0.6544895 | 0.6180164 | 1 | SHANK2 |
| Molecular Function | GO:0030375 | thyroid hormone receptor coactivator activity                                                         | 1/2321 | 4/18352 | 0.4177784 | 0.6544895 | 0.6180164 | 1 | NCOA2  |

|                    |            |                                                              |        |         |           |           |           |   |        |
|--------------------|------------|--------------------------------------------------------------|--------|---------|-----------|-----------|-----------|---|--------|
| Molecular Function | GO:0031781 | type 3 melanocortin receptor binding                         | 1/2321 | 4/18352 | 0.4177784 | 0.6544895 | 0.6180164 | 1 | MRAP   |
| Molecular Function | GO:0031782 | type 4 melanocortin receptor binding                         | 1/2321 | 4/18352 | 0.4177784 | 0.6544895 | 0.6180164 | 1 | MRAP   |
| Molecular Function | GO:0031852 | mu-type opioid receptor binding                              | 1/2321 | 4/18352 | 0.4177784 | 0.6544895 | 0.6180164 | 1 | GNAO1  |
| Molecular Function | GO:0032422 | purine-rich negative regulatory element binding              | 1/2321 | 4/18352 | 0.4177784 | 0.6544895 | 0.6180164 | 1 | ELK3   |
| Molecular Function | GO:0034189 | very-low-density lipoprotein particle binding                | 1/2321 | 4/18352 | 0.4177784 | 0.6544895 | 0.6180164 | 1 | PLTP   |
| Molecular Function | GO:0034191 | apolipoprotein A-I receptor binding                          | 1/2321 | 4/18352 | 0.4177784 | 0.6544895 | 0.6180164 | 1 | NR1H2  |
| Molecular Function | GO:0034584 | piRNA binding                                                | 1/2321 | 4/18352 | 0.4177784 | 0.6544895 | 0.6180164 | 1 | PIWIL4 |
| Molecular Function | GO:0034597 | phosphatidylinositol-4,5-bisphosphate 4-phosphatase activity | 1/2321 | 4/18352 | 0.4177784 | 0.6544895 | 0.6180164 | 1 | INPP4A |
| Molecular Function | GO:0034648 | histone demethylase activity (H3-dimethyl-K4 specific)       | 1/2321 | 4/18352 | 0.4177784 | 0.6544895 | 0.6180164 | 1 | KDM1B  |

|                    |            |                                                         |        |         |           |           |           |   |        |
|--------------------|------------|---------------------------------------------------------|--------|---------|-----------|-----------|-----------|---|--------|
| Molecular Function | GO:0035033 | histone deacetylase regulator activity                  | 1/2321 | 4/18352 | 0.4177784 | 0.6544895 | 0.6180164 | 1 | SKI    |
| Molecular Function | GO:0035662 | Toll-like receptor 4 binding                            | 1/2321 | 4/18352 | 0.4177784 | 0.6544895 | 0.6180164 | 1 | S100A8 |
| Molecular Function | GO:0038191 | neuropilin binding                                      | 1/2321 | 4/18352 | 0.4177784 | 0.6544895 | 0.6180164 | 1 | PXN    |
| Molecular Function | GO:0042296 | ISG15 transferase activity                              | 1/2321 | 4/18352 | 0.4177784 | 0.6544895 | 0.6180164 | 1 | HERC5  |
| Molecular Function | GO:0042610 | CD8 receptor binding                                    | 1/2321 | 4/18352 | 0.4177784 | 0.6544895 | 0.6180164 | 1 | LCK    |
| Molecular Function | GO:0042731 | PH domain binding                                       | 1/2321 | 4/18352 | 0.4177784 | 0.6544895 | 0.6180164 | 1 | INPP5A |
| Molecular Function | GO:0042937 | tripeptide transmembrane transporter activity           | 1/2321 | 4/18352 | 0.4177784 | 0.6544895 | 0.6180164 | 1 | ABCC1  |
| Molecular Function | GO:0043812 | phosphatidylinositol-4-phosphate phosphatase activity   | 1/2321 | 4/18352 | 0.4177784 | 0.6544895 | 0.6180164 | 1 | INPP5F |
| Molecular Function | GO:0045145 | single-stranded DNA 5'-3' exodeoxyribonuclease activity | 1/2321 | 4/18352 | 0.4177784 | 0.6544895 | 0.6180164 | 1 | PLD3   |



|                    |            |                                                                             |        |         |           |           |           |   |        |
|--------------------|------------|-----------------------------------------------------------------------------|--------|---------|-----------|-----------|-----------|---|--------|
| Molecular Function | GO:0047134 | protein-disulfide reductase activity                                        | 1/2321 | 4/18352 | 0.4177784 | 0.6544895 | 0.6180164 | 1 | NXN    |
| Molecular Function | GO:0050253 | retinyl-palmitate esterase activity                                         | 1/2321 | 4/18352 | 0.4177784 | 0.6544895 | 0.6180164 | 1 | PNPLA2 |
| Molecular Function | GO:0050501 | hyaluronan synthase activity                                                | 1/2321 | 4/18352 | 0.4177784 | 0.6544895 | 0.6180164 | 1 | HAS3   |
| Molecular Function | GO:0050510 | N-acetylgalactosaminyl-proteoglycan 3-beta-glucuronosyltransferase activity | 1/2321 | 4/18352 | 0.4177784 | 0.6544895 | 0.6180164 | 1 | CHSY1  |
| Molecular Function | GO:0051377 | mannose-ethanolamine phosphotransferase activity                            | 1/2321 | 4/18352 | 0.4177784 | 0.6544895 | 0.6180164 | 1 | PIGN   |
| Molecular Function | GO:0051430 | corticotropin-releasing hormone receptor 1 binding                          | 1/2321 | 4/18352 | 0.4177784 | 0.6544895 | 0.6180164 | 1 | GNAO1  |
| Molecular Function | GO:0052723 | inositol hexakisphosphate 1-kinase activity                                 | 1/2321 | 4/18352 | 0.4177784 | 0.6544895 | 0.6180164 | 1 | IP6K1  |
| Molecular Function | GO:0052724 | inositol hexakisphosphate 3-kinase activity                                 | 1/2321 | 4/18352 | 0.4177784 | 0.6544895 | 0.6180164 | 1 | IP6K1  |
| Molecular Function | GO:0061821 | telomeric D-loop binding                                                    | 1/2321 | 4/18352 | 0.4177784 | 0.6544895 | 0.6180164 | 1 | BLM    |

|                    |            |                                                                                                                 |        |         |           |           |           |   |         |
|--------------------|------------|-----------------------------------------------------------------------------------------------------------------|--------|---------|-----------|-----------|-----------|---|---------|
| Molecular Function | GO:0062037 | D-loop DNA binding                                                                                              | 1/2321 | 4/18352 | 0.4177784 | 0.6544895 | 0.6180164 | 1 | BLM     |
| Molecular Function | GO:0070579 | methylcytosine dioxygenase activity                                                                             | 1/2321 | 4/18352 | 0.4177784 | 0.6544895 | 0.6180164 | 1 | TET2    |
| Molecular Function | GO:0070698 | type I activin receptor binding                                                                                 | 1/2321 | 4/18352 | 0.4177784 | 0.6544895 | 0.6180164 | 1 | NODAL   |
| Molecular Function | GO:0070996 | type 1 melanocortin receptor binding                                                                            | 1/2321 | 4/18352 | 0.4177784 | 0.6544895 | 0.6180164 | 1 | MRAP    |
| Molecular Function | GO:0071077 | adenosine 3',5'-bisphosphate transmembrane transporter activity                                                 | 1/2321 | 4/18352 | 0.4177784 | 0.6544895 | 0.6180164 | 1 | SLC33A1 |
| Molecular Function | GO:0071208 | histone pre-mRNA DCP binding                                                                                    | 1/2321 | 4/18352 | 0.4177784 | 0.6544895 | 0.6180164 | 1 | SNRPD3  |
| Molecular Function | GO:0086089 | voltage-gated potassium channel activity involved in atrial cardiac muscle cell action potential repolarization | 1/2321 | 4/18352 | 0.4177784 | 0.6544895 | 0.6180164 | 1 | KCNQ1   |
| Molecular Function | GO:0090722 | receptor-receptor interaction                                                                                   | 1/2321 | 4/18352 | 0.4177784 | 0.6544895 | 0.6180164 | 1 | FGFR1   |
| Molecular Function | GO:0097506 | deaminated base DNA N-glycosylase activity                                                                      | 1/2321 | 4/18352 | 0.4177784 | 0.6544895 | 0.6180164 | 1 | UNG     |

|                    |            |                                                                                               |        |          |           |           |           |   |                                    |
|--------------------|------------|-----------------------------------------------------------------------------------------------|--------|----------|-----------|-----------|-----------|---|------------------------------------|
| Molecular Function | GO:0098519 | nucleotide phosphatase activity, acting on free nucleotides                                   | 1/2321 | 4/18352  | 0.4177784 | 0.6544895 | 0.6180164 | 1 | PGP                                |
| Molecular Function | GO:0098882 | structural constituent of presynaptic active zone                                             | 1/2321 | 4/18352  | 0.4177784 | 0.6544895 | 0.6180164 | 1 | CTBP2                              |
| Molecular Function | GO:0099530 | G protein-coupled receptor activity involved in regulation of postsynaptic membrane potential | 1/2321 | 4/18352  | 0.4177784 | 0.6544895 | 0.6180164 | 1 | GABBR1                             |
| Molecular Function | GO:1901702 | salt transmembrane transporter activity                                                       | 1/2321 | 4/18352  | 0.4177784 | 0.6544895 | 0.6180164 | 1 | SLC2A9                             |
| Molecular Function | GO:1904288 | BAT3 complex binding                                                                          | 1/2321 | 4/18352  | 0.4177784 | 0.6544895 | 0.6180164 | 1 | AMFR                               |
| Molecular Function | GO:1905172 | RISC complex binding                                                                          | 1/2321 | 4/18352  | 0.4177784 | 0.6544895 | 0.6180164 | 1 | SND1                               |
| Molecular Function | GO:1990269 | RNA polymerase II C-terminal domain phosphoserine binding                                     | 1/2321 | 4/18352  | 0.4177784 | 0.6544895 | 0.6180164 | 1 | SCAF8                              |
| Molecular Function | GO:1990757 | ubiquitin ligase activator activity                                                           | 1/2321 | 4/18352  | 0.4177784 | 0.6544895 | 0.6180164 | 1 | FZR1                               |
| Molecular Function | GO:0060590 | ATPase regulator activity                                                                     | 6/2321 | 41/18352 | 0.4185419 | 0.6552137 | 0.6187003 | 6 | HSCB/PFN1/DNAJB6/FNIP2/BAG5/AHSA2P |

|                    |            |                                                                                         |         |           |           |           |           |    |                                                                                                                                                                                                                                                                                                                             |
|--------------------|------------|-----------------------------------------------------------------------------------------|---------|-----------|-----------|-----------|-----------|----|-----------------------------------------------------------------------------------------------------------------------------------------------------------------------------------------------------------------------------------------------------------------------------------------------------------------------------|
| Molecular Function | GO:0008266 | poly(U) RNA binding                                                                     | 4/2321  | 26/18352  | 0.4212372 | 0.6570696 | 0.6204527 | 4  | PABPC4/ATXN1/DAZAP1/DIS3L2                                                                                                                                                                                                                                                                                                  |
| Molecular Function | GO:0015491 | cation:cation antiporter activity                                                       | 4/2321  | 26/18352  | 0.4212372 | 0.6570696 | 0.6204527 | 4  | SLC11A1/SLC24A4/SLC8A1/SLC41A1                                                                                                                                                                                                                                                                                              |
| Molecular Function | GO:0016701 | oxidoreductase activity, acting on single donors with incorporation of molecular oxygen | 4/2321  | 26/18352  | 0.4212372 | 0.6570696 | 0.6204527 | 4  | HGD/ADO/ADI1/P4HA2                                                                                                                                                                                                                                                                                                          |
| Molecular Function | GO:0030371 | translation repressor activity                                                          | 4/2321  | 26/18352  | 0.4212372 | 0.6570696 | 0.6204527 | 4  | SAMD4A/RARA/CPEB3/CELF1                                                                                                                                                                                                                                                                                                     |
| Molecular Function | GO:0048027 | mRNA 5'-UTR binding                                                                     | 4/2321  | 26/18352  | 0.4212372 | 0.6570696 | 0.6204527 | 4  | LARP1/RARA/IGF2BP3/SYNERIP                                                                                                                                                                                                                                                                                                  |
| Molecular Function | GO:0005262 | calcium channel activity                                                                | 16/2321 | 118/18352 | 0.4233091 | 0.6598284 | 0.6230578 | 16 | TRPM2/ITPR2/CACNA1C/CACNA2D4/SLC24A4/PKD1L1/ANXA6/ITPR1/TRPM6/RASA3/TPCN2/TRPM3/TMEM37/TMC1/CACNA1B/TRPV2                                                                                                                                                                                                                   |
| Molecular Function | GO:0015370 | solute:sodium symporter activity                                                        | 10/2321 | 72/18352  | 0.427317  | 0.6653034 | 0.6282277 | 10 | SLC10A1/MFSD2A/SLC13A4/SLC1A2/SLC1A6/SLC1A3/SLC5A10/SLC13A5/SLC12A1/SLC23A1                                                                                                                                                                                                                                                 |
| Molecular Function | GO:0004857 | enzyme inhibitor activity                                                               | 50/2321 | 383/18352 | 0.427433  | 0.6653034 | 0.6282277 | 50 | SLPI/RPTOR/SPRED2/RNH1/PRKAG2/LMTK2/CSTA/TIMP2/SERPINA1/SPOCK2/SH3BP5L/RPS6KA1/APLP2/ITPRIP/RHOH/MGAT5/PPP1R1B/URI1/SERPINB11/SKI/PRKAR1B/ARRB1/CABIN1/SPINT2/SH3BP5/SERPINB2/TESC/BIN1/APP/UBE2O/ELFN2/PRKRIP1/PHACTR2/GMFB/PDE6H/PSMF1/CRIM1/NOL3/TAOK3/FNIP2/NOTCH1/CABP1/DUS2/LTF/COL28A1/TRIB1/WDTC1/HEXIM1/GMFG/PARP9 |
| Molecular Function | GO:0016874 | ligase activity                                                                         | 22/2321 | 165/18352 | 0.4298045 | 0.6685165 | 0.6312617 | 22 | ACSL1/MTHFD1L/MTHFS/CARS2/ACSS1/PC/ACACB/TLL4/TLL11/ACSS2/MTHFD1/ACACA/ACSF3/EARS2/ACSS3/TLL1/NAE1/ATP5PD/MARS1/GATB/ATP6VOC/YARS1                                                                                                                                                                                          |

|                    |            |                                                        |         |           |           |           |           |    |                                                                                                 |
|--------------------|------------|--------------------------------------------------------|---------|-----------|-----------|-----------|-----------|----|-------------------------------------------------------------------------------------------------|
| Molecular Function | GO:1990939 | ATP-dependent microtubule motor activity               | 5/2321  | 34/18352  | 0.4333767 | 0.6735913 | 0.6360537 | 5  | DNAH3/DYNC1H1/KIF5C/KIF1B/KIFC3                                                                 |
| Molecular Function | GO:0099106 | ion channel regulator activity                         | 16/2321 | 119/18352 | 0.4372155 | 0.6770706 | 0.6393391 | 16 | PRKCZ/KCNE1/KCNAB2/FXYD2/FXYD1/SGK1/ITPR1/KCNIP1/PRKCB/NRXN1/NRXN2/NEDD4/SGK2/NPY/CABP4/STIMATE |
| Molecular Function | GO:0004653 | polypeptide N-acetylgalactosaminyltransferase activity | 3/2321  | 19/18352  | 0.4381045 | 0.6770706 | 0.6393391 | 3  | GALNT2/GALNT12/GALNT9                                                                           |
| Molecular Function | GO:0005086 | ARF guanyl-nucleotide exchange factor activity         | 3/2321  | 19/18352  | 0.4381045 | 0.6770706 | 0.6393391 | 3  | IQSEC1/CYTH4/FBXO8                                                                              |
| Molecular Function | GO:0010314 | phosphatidylinositol-5-phosphate binding               | 3/2321  | 19/18352  | 0.4381045 | 0.6770706 | 0.6393391 | 3  | SH3PXD2B/SNX3/RUBCNL                                                                            |
| Molecular Function | GO:0015125 | bile acid transmembrane transporter activity           | 3/2321  | 19/18352  | 0.4381045 | 0.6770706 | 0.6393391 | 3  | SLC51A/SLC10A1/ABCC3                                                                            |
| Molecular Function | GO:0019789 | SUMO transferase activity                              | 3/2321  | 19/18352  | 0.4381045 | 0.6770706 | 0.6393391 | 3  | HDAC4/NSMCE2/RNF212                                                                             |
| Molecular Function | GO:0030296 | protein tyrosine kinase activator activity             | 3/2321  | 19/18352  | 0.4381045 | 0.6770706 | 0.6393391 | 3  | CCL5/DGKQ/GHRL                                                                                  |
| Molecular Function | GO:0071617 | lysophospholipid acyltransferase activity              | 3/2321  | 19/18352  | 0.4381045 | 0.6770706 | 0.6393391 | 3  | LPCAT1/ABHD5/AGPAT5                                                                             |

|                    |            |                                                                                                             |        |          |           |           |           |   |                                                    |
|--------------------|------------|-------------------------------------------------------------------------------------------------------------|--------|----------|-----------|-----------|-----------|---|----------------------------------------------------|
| Molecular Function | GO:0022839 | ion gated channel activity                                                                                  | 6/2321 | 42/18352 | 0.4421545 | 0.6818768 | 0.6438775 | 6 | KCNN1/ANO7/TRPM3/ANO10/ANO6/ANO8                   |
| Molecular Function | GO:0030544 | Hsp70 protein binding                                                                                       | 6/2321 | 42/18352 | 0.4421545 | 0.6818768 | 0.6438775 | 6 | CREB1/METTL21A/ERN1/IQCG/NOD2/PRKN                 |
| Molecular Function | GO:0042287 | MHC protein binding                                                                                         | 6/2321 | 42/18352 | 0.4421545 | 0.6818768 | 0.6438775 | 6 | PILRA/PILRB/TUBB4B/TRGV9/MARCHF8/CYRIB             |
| Molecular Function | GO:0070888 | E-box binding                                                                                               | 7/2321 | 50/18352 | 0.4489387 | 0.6907939 | 0.6522977 | 7 | PPARG/TCF12/HDAC1/ARNTL/TCF3/PER1/HES3             |
| Molecular Function | GO:0001968 | fibronectin binding                                                                                         | 4/2321 | 27/18352 | 0.4509296 | 0.6907939 | 0.6522977 | 4 | LOXL3/THBS1/ITGB3/PLEKHA2                          |
| Molecular Function | GO:0001786 | phosphatidylserine binding                                                                                  | 8/2321 | 58/18352 | 0.4544232 | 0.6907939 | 0.6522977 | 8 | CPNE6/OSBPL5/ANXA6/THBS1/CPNE1/ASAP1/OSBPL10/SYT17 |
| Molecular Function | GO:0016796 | exonuclease activity, active with either ribo- or deoxyribonucleic acids and producing 5'-phosphomonoesters | 8/2321 | 58/18352 | 0.4544232 | 0.6907939 | 0.6522977 | 8 | POLE/EXOSC2/MEIOB/ERI3/DIS3L2/PLD3/TOE1/ISG20      |
| Molecular Function | GO:1990841 | promoter-specific chromatin binding                                                                         | 8/2321 | 58/18352 | 0.4544232 | 0.6907939 | 0.6522977 | 8 | HDAC4/USP3/EHMT2/TAF10/HDAC1/DNMT1/NRL/ERCC1       |
| Molecular Function | GO:0004115 | 3',5'-cyclic-AMP phosphodiesterase activity                                                                 | 2/2321 | 12/18352 | 0.4597121 | 0.6907939 | 0.6522977 | 2 | PDE4D/PDE3B                                        |

|                    |            |                                                                                 |        |          |           |           |           |   |                   |
|--------------------|------------|---------------------------------------------------------------------------------|--------|----------|-----------|-----------|-----------|---|-------------------|
| Molecular Function | GO:0004198 | calcium-dependent cysteine-type endopeptidase activity                          | 2/2321 | 12/18352 | 0.4597121 | 0.6907939 | 0.6522977 | 2 | CAPN14/ADGB       |
| Molecular Function | GO:0005035 | death receptor activity                                                         | 2/2321 | 12/18352 | 0.4597121 | 0.6907939 | 0.6522977 | 2 | TNFRSF1B/TNFRSF1A |
| Molecular Function | GO:0008353 | RNA polymerase II CTD heptapeptide repeat kinase activity                       | 2/2321 | 12/18352 | 0.4597121 | 0.6907939 | 0.6522977 | 2 | BRD4/CDK13        |
| Molecular Function | GO:0016668 | oxidoreductase activity, acting on a sulfur group of donors, NAD(P) as acceptor | 2/2321 | 12/18352 | 0.4597121 | 0.6907939 | 0.6522977 | 2 | NXN/TXNRD2        |
| Molecular Function | GO:0017154 | semaphorin receptor activity                                                    | 2/2321 | 12/18352 | 0.4597121 | 0.6907939 | 0.6522977 | 2 | PLXNC1/NRP2       |
| Molecular Function | GO:0022858 | alanine transmembrane transporter activity                                      | 2/2321 | 12/18352 | 0.4597121 | 0.6907939 | 0.6522977 | 2 | SLC36A3/SLC7A8    |
| Molecular Function | GO:0033130 | acetylcholine receptor binding                                                  | 2/2321 | 12/18352 | 0.4597121 | 0.6907939 | 0.6522977 | 2 | NRXN1/UBXN2A      |
| Molecular Function | GO:0034452 | dynactin binding                                                                | 2/2321 | 12/18352 | 0.4597121 | 0.6907939 | 0.6522977 | 2 | BICD2/HTT         |
| Molecular Function | GO:0035004 | phosphatidylinositol 3-kinase activity                                          | 2/2321 | 12/18352 | 0.4597121 | 0.6907939 | 0.6522977 | 2 | PIK3CD/PIK3R6     |

|                    |            |                                                                                                                      |         |          |           |           |           |    |                                                                                    |
|--------------------|------------|----------------------------------------------------------------------------------------------------------------------|---------|----------|-----------|-----------|-----------|----|------------------------------------------------------------------------------------|
| Molecular Function | GO:0035325 | Toll-like receptor binding                                                                                           | 2/2321  | 12/18352 | 0.4597121 | 0.6907939 | 0.6522977 | 2  | S100A8/TOLLIP                                                                      |
| Molecular Function | GO:0046790 | virion binding                                                                                                       | 2/2321  | 12/18352 | 0.4597121 | 0.6907939 | 0.6522977 | 2  | HIPK2/NECTIN1                                                                      |
| Molecular Function | GO:0047555 | 3',5'-cyclic-GMP phosphodiesterase activity                                                                          | 2/2321  | 12/18352 | 0.4597121 | 0.6907939 | 0.6522977 | 2  | PDE6H/PDE9A                                                                        |
| Molecular Function | GO:0051011 | microtubule minus-end binding                                                                                        | 2/2321  | 12/18352 | 0.4597121 | 0.6907939 | 0.6522977 | 2  | NUMA1/TUBGCP2                                                                      |
| Molecular Function | GO:0061578 | Lys63-specific deubiquitinase activity                                                                               | 2/2321  | 12/18352 | 0.4597121 | 0.6907939 | 0.6522977 | 2  | TNFAIP3/CYLD                                                                       |
| Molecular Function | GO:1902282 | voltage-gated potassium channel activity involved in ventricular cardiac muscle cell action potential repolarization | 2/2321  | 12/18352 | 0.4597121 | 0.6907939 | 0.6522977 | 2  | KCNE1/KCNQ1                                                                        |
| Molecular Function | GO:0030295 | protein kinase activator activity                                                                                    | 11/2321 | 82/18352 | 0.4663366 | 0.6907939 | 0.6522977 | 11 | RPTOR/PRKAG2/CCL5/WNT11/DGKQ/GHRL/CAB39/STK3/LTF/MARK2/DAZAP2                      |
| Molecular Function | GO:0017046 | peptide hormone binding                                                                                              | 7/2321  | 51/18352 | 0.470412  | 0.6907939 | 0.6522977 | 7  | PIK3R1/IGF1R/CRHBP/GIPR/VIPR2/INHBA/C2CD2L                                         |
| Molecular Function | GO:1990782 | protein tyrosine kinase binding                                                                                      | 13/2321 | 98/18352 | 0.4720715 | 0.6907939 | 0.6522977 | 13 | TJP2/ANGPT1/PIK3R1/GAB2/DUSP22/PITPNM2/DOK2/PITPNM1/CASS4/DUSP3/BANK1/PLCG1/DAZAP2 |



|                    |            |                                                        |        |          |           |           |           |   |                                                      |
|--------------------|------------|--------------------------------------------------------|--------|----------|-----------|-----------|-----------|---|------------------------------------------------------|
| Molecular Function | GO:0005123 | death receptor binding                                 | 3/2321 | 20/18352 | 0.4728529 | 0.6907939 | 0.6522977 | 3 | RIPK1/NTF4/FADD                                      |
| Molecular Function | GO:0005537 | mannose binding                                        | 3/2321 | 20/18352 | 0.4728529 | 0.6907939 | 0.6522977 | 3 | BSG/LMAN2/CLN5                                       |
| Molecular Function | GO:0031418 | L-ascorbic acid binding                                | 3/2321 | 20/18352 | 0.4728529 | 0.6907939 | 0.6522977 | 3 | P4HA2/P3H3/P3H1                                      |
| Molecular Function | GO:0031681 | G-protein beta-subunit binding                         | 3/2321 | 20/18352 | 0.4728529 | 0.6907939 | 0.6522977 | 3 | GNG7/GNG2/F2R                                        |
| Molecular Function | GO:0051010 | microtubule plus-end binding                           | 3/2321 | 20/18352 | 0.4728529 | 0.6907939 | 0.6522977 | 3 | DCTN1/NUMA1/FBXW11                                   |
| Molecular Function | GO:0070182 | DNA polymerase binding                                 | 3/2321 | 20/18352 | 0.4728529 | 0.6907939 | 0.6522977 | 3 | RTEL1/SMG6/RMRP                                      |
| Molecular Function | GO:0072349 | modified amino acid transmembrane transporter activity | 3/2321 | 20/18352 | 0.4728529 | 0.6907939 | 0.6522977 | 3 | ABCC1/SLC19A1/SLC22A5                                |
| Molecular Function | GO:0004536 | deoxyribonuclease activity                             | 8/2321 | 59/18352 | 0.4743703 | 0.6907939 | 0.6522977 | 8 | POLE/MEIOB/DFFB/DNASE1L3/PLD3/ERCC1/SLX4/ISG20       |
| Molecular Function | GO:0032934 | sterol binding                                         | 8/2321 | 59/18352 | 0.4743703 | 0.6907939 | 0.6522977 | 8 | OSBPL5/ANXA6/ABCG1/OSBPL6/ABCA1/OSBPL10/NPC1/GRAMD1A |

|                    |            |                                                                    |         |           |           |           |           |    |                                                                                                                               |
|--------------------|------------|--------------------------------------------------------------------|---------|-----------|-----------|-----------|-----------|----|-------------------------------------------------------------------------------------------------------------------------------|
| Molecular Function | GO:0003697 | single-stranded DNA binding                                        | 15/2321 | 114/18352 | 0.4767689 | 0.6907939 | 0.6522977 | 15 | BLM/BRCA2/RAD52/TDP1/NEIL3/MCM5/MEIOB/IGHMBP2/FUBP3/MCM2/DMC1/SUB1/ERCC1/SSBP3/FBH1                                           |
| Molecular Function | GO:0008201 | heparin binding                                                    | 22/2321 | 169/18352 | 0.4769113 | 0.6907939 | 0.6522977 | 22 | AZU1/ELANE/CTSG/MPO/NRP2/APLP2/CRISPLD2/LIPC/COLQ/THBS1/APP/TNXB/PCSK6/FGFR1/ADAMTSL5/PTPRC/COL5A1/SLIT3/LTF/EVA1C/SLIT1/CCN4 |
| Molecular Function | GO:0003785 | actin monomer binding                                              | 4/2321  | 28/18352  | 0.48011   | 0.6907939 | 0.6522977 | 4  | PFN1/MTSS1/PRKCE/MRTFA                                                                                                        |
| Molecular Function | GO:0016645 | oxidoreductase activity,<br>acting on the CH-NH group of<br>donors | 4/2321  | 28/18352  | 0.48011   | 0.6907939 | 0.6522977 | 4  | ALDH4A1/AIFM2/MTHFD1/CRYM                                                                                                     |
| Molecular Function | GO:0045499 | chemorepellent activity                                            | 4/2321  | 28/18352  | 0.48011   | 0.6907939 | 0.6522977 | 4  | SEMA6B/SEMA4A/SEMA4B/SEMA4D                                                                                                   |
| Molecular Function | GO:0080025 | phosphatidylinositol-3,5-<br>bisphosphate binding                  | 4/2321  | 28/18352  | 0.48011   | 0.6907939 | 0.6522977 | 4  | ACAP2/SH3PXD2B/WIPI2/SNX3                                                                                                     |
| Molecular Function | GO:0004722 | protein serine/threonine<br>phosphatase activity                   | 10/2321 | 75/18352  | 0.4805929 | 0.6907939 | 0.6522977 | 10 | CTDP1/LCK/PHLPP1/CTDSPL/LRRK1/PPP2R1A/PPP1CB/PPP2R1B/CDC14A/PPM1N                                                             |
| Molecular Function | GO:0000175 | 3'-5'-exoribonuclease activity                                     | 5/2321  | 36/18352  | 0.4850223 | 0.6907939 | 0.6522977 | 5  | EXOSC2/ERI3/DIS3L2/TOE1/ISG20                                                                                                 |
| Molecular Function | GO:0042162 | telomeric DNA binding                                              | 5/2321  | 36/18352  | 0.4850223 | 0.6907939 | 0.6522977 | 5  | BLM/HMBOX1/SMG7/SMG6/TP53BP1                                                                                                  |

|                    |            |                                                                                                       |         |           |           |           |           |    |                                                                                                                           |
|--------------------|------------|-------------------------------------------------------------------------------------------------------|---------|-----------|-----------|-----------|-----------|----|---------------------------------------------------------------------------------------------------------------------------|
| Molecular Function | GO:0043394 | proteoglycan binding                                                                                  | 5/2321  | 36/18352  | 0.4850223 | 0.6907939 | 0.6522977 | 5  | AZU1/THBS1/PTPRC/CTSB/COL5A1                                                                                              |
| Molecular Function | GO:0016705 | oxidoreductase activity, acting on paired donors, with incorporation or reduction of molecular oxygen | 21/2321 | 162/18352 | 0.4872391 | 0.6907939 | 0.6522977 | 21 | P4HB/KDM4B/MICAL1/KDM2A/MICAL2/MICAL3/AKR1D1/HSPBAP1/CYP4F3/POR/KDM1B/KDM4C/FTO/TET2/KDM7A/P4HA2/ASPH/SCD/P3H3/PEDS1/P3H1 |
| Molecular Function | GO:0047485 | protein N-terminus binding                                                                            | 14/2321 | 107/18352 | 0.4893076 | 0.6907939 | 0.6522977 | 14 | STX5/NCOR2/ZMYND8/RBPJ/ACTN4/HDAC1/NCOA1/SYNGR3/YWHAQ/RELA/SRRM2/BANF1/ERCC2/SLA2                                         |
| Molecular Function | GO:0000048 | peptidyltransferase activity                                                                          | 1/2321  | 5/18352   | 0.4914288 | 0.6907939 | 0.6522977 | 1  | GGT1                                                                                                                      |
| Molecular Function | GO:0000064 | L-ornithine transmembrane transporter activity                                                        | 1/2321  | 5/18352   | 0.4914288 | 0.6907939 | 0.6522977 | 1  | SLC7A1                                                                                                                    |
| Molecular Function | GO:0000104 | succinate dehydrogenase activity                                                                      | 1/2321  | 5/18352   | 0.4914288 | 0.6907939 | 0.6522977 | 1  | SDHD                                                                                                                      |
| Molecular Function | GO:0000298 | endopolyphosphatase activity                                                                          | 1/2321  | 5/18352   | 0.4914288 | 0.6907939 | 0.6522977 | 1  | NUDT3                                                                                                                     |
| Molecular Function | GO:0000403 | Y-form DNA binding                                                                                    | 1/2321  | 5/18352   | 0.4914288 | 0.6907939 | 0.6522977 | 1  | BLM                                                                                                                       |
| Molecular Function | GO:0000832 | inositol hexakisphosphate 5-kinase activity                                                           | 1/2321  | 5/18352   | 0.4914288 | 0.6907939 | 0.6522977 | 1  | IP6K1                                                                                                                     |

|                    |            |                                                     |        |         |           |           |           |   |          |
|--------------------|------------|-----------------------------------------------------|--------|---------|-----------|-----------|-----------|---|----------|
| Molecular Function | GO:0001537 | N-acetylgalactosamine 4-O-sulfotransferase activity | 1/2321 | 5/18352 | 0.4914288 | 0.6907939 | 0.6522977 | 1 | CHST11   |
| Molecular Function | GO:0003945 | N-acetyllactosamine synthase activity               | 1/2321 | 5/18352 | 0.4914288 | 0.6907939 | 0.6522977 | 1 | B4GALT3  |
| Molecular Function | GO:0004028 | 3-chloroallyl aldehyde dehydrogenase activity       | 1/2321 | 5/18352 | 0.4914288 | 0.6907939 | 0.6522977 | 1 | ALDH1A2  |
| Molecular Function | GO:0004046 | aminoacylase activity                               | 1/2321 | 5/18352 | 0.4914288 | 0.6907939 | 0.6522977 | 1 | CAT      |
| Molecular Function | GO:0004185 | serine-type carboxypeptidase activity               | 1/2321 | 5/18352 | 0.4914288 | 0.6907939 | 0.6522977 | 1 | CPD      |
| Molecular Function | GO:0004376 | glycolipid mannosyltransferase activity             | 1/2321 | 5/18352 | 0.4914288 | 0.6907939 | 0.6522977 | 1 | ALG11    |
| Molecular Function | GO:0004464 | leukotriene-C4 synthase activity                    | 1/2321 | 5/18352 | 0.4914288 | 0.6907939 | 0.6522977 | 1 | MGST2    |
| Molecular Function | GO:0004465 | lipoprotein lipase activity                         | 1/2321 | 5/18352 | 0.4914288 | 0.6907939 | 0.6522977 | 1 | LIPC     |
| Molecular Function | GO:0004530 | deoxyribonuclease I activity                        | 1/2321 | 5/18352 | 0.4914288 | 0.6907939 | 0.6522977 | 1 | DNASE1L3 |

|                    |            |                                                                     |        |         |           |           |           |   |         |
|--------------------|------------|---------------------------------------------------------------------|--------|---------|-----------|-----------|-----------|---|---------|
| Molecular Function | GO:0004563 | beta-N-acetylhexosaminidase activity                                | 1/2321 | 5/18352 | 0.4914288 | 0.6907939 | 0.6522977 | 1 | HEXB    |
| Molecular Function | GO:0004579 | dolichyl-diphosphooligosaccharide-protein glycotransferase activity | 1/2321 | 5/18352 | 0.4914288 | 0.6907939 | 0.6522977 | 1 | RPN1    |
| Molecular Function | GO:0004668 | protein-arginine deiminase activity                                 | 1/2321 | 5/18352 | 0.4914288 | 0.6907939 | 0.6522977 | 1 | PADI2   |
| Molecular Function | GO:0004758 | serine C-palmitoyltransferase activity                              | 1/2321 | 5/18352 | 0.4914288 | 0.6907939 | 0.6522977 | 1 | SPTLC2  |
| Molecular Function | GO:0005007 | fibroblast growth factor-activated receptor activity                | 1/2321 | 5/18352 | 0.4914288 | 0.6907939 | 0.6522977 | 1 | FGFR1   |
| Molecular Function | GO:0005025 | transforming growth factor beta receptor activity, type I           | 1/2321 | 5/18352 | 0.4914288 | 0.6907939 | 0.6522977 | 1 | BMPRI1B |
| Molecular Function | GO:0005163 | nerve growth factor receptor binding                                | 1/2321 | 5/18352 | 0.4914288 | 0.6907939 | 0.6522977 | 1 | NTF4    |
| Molecular Function | GO:0008186 | RNA-dependent ATPase activity                                       | 1/2321 | 5/18352 | 0.4914288 | 0.6907939 | 0.6522977 | 1 | IGHMBP2 |
| Molecular Function | GO:0008273 | calcium, potassium:sodium antiporter activity                       | 1/2321 | 5/18352 | 0.4914288 | 0.6907939 | 0.6522977 | 1 | SLC24A4 |

|                    |            |                                                          |        |         |           |           |           |   |         |
|--------------------|------------|----------------------------------------------------------|--------|---------|-----------|-----------|-----------|---|---------|
| Molecular Function | GO:0008486 | diphosphoinositol-polyphosphate diphosphatase activity   | 1/2321 | 5/18352 | 0.4914288 | 0.6907939 | 0.6522977 | 1 | NUDT3   |
| Molecular Function | GO:0015057 | thrombin-activated receptor activity                     | 1/2321 | 5/18352 | 0.4914288 | 0.6907939 | 0.6522977 | 1 | F2R     |
| Molecular Function | GO:0015213 | uridine transmembrane transporter activity               | 1/2321 | 5/18352 | 0.4914288 | 0.6907939 | 0.6522977 | 1 | SLC29A1 |
| Molecular Function | GO:0015214 | pyrimidine nucleoside transmembrane transporter activity | 1/2321 | 5/18352 | 0.4914288 | 0.6907939 | 0.6522977 | 1 | SLC29A1 |
| Molecular Function | GO:0015220 | choline transmembrane transporter activity               | 1/2321 | 5/18352 | 0.4914288 | 0.6907939 | 0.6522977 | 1 | SLC44A4 |
| Molecular Function | GO:0015277 | kainate selective glutamate receptor activity            | 1/2321 | 5/18352 | 0.4914288 | 0.6907939 | 0.6522977 | 1 | GRIK4   |
| Molecular Function | GO:0016416 | O-palmitoyltransferase activity                          | 1/2321 | 5/18352 | 0.4914288 | 0.6907939 | 0.6522977 | 1 | CPT1A   |
| Molecular Function | GO:0016453 | C-acetyltransferase activity                             | 1/2321 | 5/18352 | 0.4914288 | 0.6907939 | 0.6522977 | 1 | ACAT1   |
| Molecular Function | GO:0016454 | C-palmitoyltransferase activity                          | 1/2321 | 5/18352 | 0.4914288 | 0.6907939 | 0.6522977 | 1 | SPTLC2  |

|                    |            |                                                                                                                                                               |        |         |           |           |           |   |         |
|--------------------|------------|---------------------------------------------------------------------------------------------------------------------------------------------------------------|--------|---------|-----------|-----------|-----------|---|---------|
| Molecular Function | GO:0016717 | oxidoreductase activity, acting on paired donors, with oxidation of a pair of donors resulting in the reduction of molecular oxygen to two molecules of water | 1/2321 | 5/18352 | 0.4914288 | 0.6907939 | 0.6522977 | 1 | SCD     |
| Molecular Function | GO:0016841 | ammonia-lyase activity                                                                                                                                        | 1/2321 | 5/18352 | 0.4914288 | 0.6907939 | 0.6522977 | 1 | HAL     |
| Molecular Function | GO:0017034 | Rap guanyl-nucleotide exchange factor activity                                                                                                                | 1/2321 | 5/18352 | 0.4914288 | 0.6907939 | 0.6522977 | 1 | RAPGEF2 |
| Molecular Function | GO:0019238 | cyclohydrolase activity                                                                                                                                       | 1/2321 | 5/18352 | 0.4914288 | 0.6907939 | 0.6522977 | 1 | MTHFD1  |
| Molecular Function | GO:0022850 | serotonin-gated cation-selective channel activity                                                                                                             | 1/2321 | 5/18352 | 0.4914288 | 0.6907939 | 0.6522977 | 1 | HTR3A   |
| Molecular Function | GO:0031013 | troponin I binding                                                                                                                                            | 1/2321 | 5/18352 | 0.4914288 | 0.6907939 | 0.6522977 | 1 | TNNT3   |
| Molecular Function | GO:0031694 | alpha-2A adrenergic receptor binding                                                                                                                          | 1/2321 | 5/18352 | 0.4914288 | 0.6907939 | 0.6522977 | 1 | GRK2    |
| Molecular Function | GO:0031721 | hemoglobin alpha binding                                                                                                                                      | 1/2321 | 5/18352 | 0.4914288 | 0.6907939 | 0.6522977 | 1 | HBB     |
| Molecular Function | GO:0031726 | CCR1 chemokine receptor binding                                                                                                                               | 1/2321 | 5/18352 | 0.4914288 | 0.6907939 | 0.6522977 | 1 | CCL5    |

|                    |            |                                                |        |         |           |           |           |   |         |
|--------------------|------------|------------------------------------------------|--------|---------|-----------|-----------|-----------|---|---------|
| Molecular Function | GO:0031728 | CCR3 chemokine receptor binding                | 1/2321 | 5/18352 | 0.4914288 | 0.6907939 | 0.6522977 | 1 | CCL27   |
| Molecular Function | GO:0031779 | melanocortin receptor binding                  | 1/2321 | 5/18352 | 0.4914288 | 0.6907939 | 0.6522977 | 1 | MRAP    |
| Molecular Function | GO:0031802 | type 5 metabotropic glutamate receptor binding | 1/2321 | 5/18352 | 0.4914288 | 0.6907939 | 0.6522977 | 1 | DNM3    |
| Molecular Function | GO:0032217 | riboflavin transmembrane transporter activity  | 1/2321 | 5/18352 | 0.4914288 | 0.6907939 | 0.6522977 | 1 | SLC52A2 |
| Molecular Function | GO:0034186 | apolipoprotein A-I binding                     | 1/2321 | 5/18352 | 0.4914288 | 0.6907939 | 0.6522977 | 1 | ABCA1   |
| Molecular Function | GO:0034431 | bis(5'-adenosyl)-hexaphosphatase activity      | 1/2321 | 5/18352 | 0.4914288 | 0.6907939 | 0.6522977 | 1 | NUDT3   |
| Molecular Function | GO:0034432 | bis(5'-adenosyl)-pentaphosphatase activity     | 1/2321 | 5/18352 | 0.4914288 | 0.6907939 | 0.6522977 | 1 | NUDT3   |
| Molecular Function | GO:0034481 | chondroitin sulfotransferase activity          | 1/2321 | 5/18352 | 0.4914288 | 0.6907939 | 0.6522977 | 1 | CHST11  |
| Molecular Function | GO:0034711 | inhibin binding                                | 1/2321 | 5/18352 | 0.4914288 | 0.6907939 | 0.6522977 | 1 | INHBA   |



|                    |            |                                                                      |        |         |           |           |           |   |          |
|--------------------|------------|----------------------------------------------------------------------|--------|---------|-----------|-----------|-----------|---|----------|
| Molecular Function | GO:0035242 | protein-arginine omega-N<br>asymmetric<br>methyltransferase activity | 1/2321 | 5/18352 | 0.4914288 | 0.6907939 | 0.6522977 | 1 | PRMT2    |
| Molecular Function | GO:0035368 | selenocysteine insertion<br>sequence binding                         | 1/2321 | 5/18352 | 0.4914288 | 0.6907939 | 0.6522977 | 1 | SECISBP2 |
| Molecular Function | GO:0035514 | DNA demethylase activity                                             | 1/2321 | 5/18352 | 0.4914288 | 0.6907939 | 0.6522977 | 1 | FTO      |
| Molecular Function | GO:0035515 | oxidative RNA demethylase<br>activity                                | 1/2321 | 5/18352 | 0.4914288 | 0.6907939 | 0.6522977 | 1 | FTO      |
| Molecular Function | GO:0035671 | enone reductase activity                                             | 1/2321 | 5/18352 | 0.4914288 | 0.6907939 | 0.6522977 | 1 | AKR1D1   |
| Molecular Function | GO:0038085 | vascular endothelial growth<br>factor binding                        | 1/2321 | 5/18352 | 0.4914288 | 0.6907939 | 0.6522977 | 1 | PDGFRB   |
| Molecular Function | GO:0038132 | neuregulin binding                                                   | 1/2321 | 5/18352 | 0.4914288 | 0.6907939 | 0.6522977 | 1 | ITGB3    |
| Molecular Function | GO:0042030 | ATPase inhibitor activity                                            | 1/2321 | 5/18352 | 0.4914288 | 0.6907939 | 0.6522977 | 1 | FNIP2    |
| Molecular Function | GO:0042799 | histone methyltransferase<br>activity (H4-K20 specific)              | 1/2321 | 5/18352 | 0.4914288 | 0.6907939 | 0.6522977 | 1 | NSD2     |

|                    |            |                                                                                              |        |         |           |           |           |   |         |
|--------------------|------------|----------------------------------------------------------------------------------------------|--------|---------|-----------|-----------|-----------|---|---------|
| Molecular Function | GO:0043035 | chromatin insulator sequence binding                                                         | 1/2321 | 5/18352 | 0.4914288 | 0.6907939 | 0.6522977 | 1 | ZNF276  |
| Molecular Function | GO:0043125 | ErbB-3 class receptor binding                                                                | 1/2321 | 5/18352 | 0.4914288 | 0.6907939 | 0.6522977 | 1 | PIK3R1  |
| Molecular Function | GO:0043199 | sulfate binding                                                                              | 1/2321 | 5/18352 | 0.4914288 | 0.6907939 | 0.6522977 | 1 | RCC1    |
| Molecular Function | GO:0043426 | MRF binding                                                                                  | 1/2321 | 5/18352 | 0.4914288 | 0.6907939 | 0.6522977 | 1 | CREBBP  |
| Molecular Function | GO:0043994 | histone acetyltransferase activity (H3-K23 specific)                                         | 1/2321 | 5/18352 | 0.4914288 | 0.6907939 | 0.6522977 | 1 | BRD1    |
| Molecular Function | GO:0046870 | cadmium ion binding                                                                          | 1/2321 | 5/18352 | 0.4914288 | 0.6907939 | 0.6522977 | 1 | SLC11A2 |
| Molecular Function | GO:0046912 | transferase activity, transferring acyl groups, acyl groups converted into alkyl on transfer | 1/2321 | 5/18352 | 0.4914288 | 0.6907939 | 0.6522977 | 1 | HMGCS1  |
| Molecular Function | GO:0046976 | histone methyltransferase activity (H3-K27 specific)                                         | 1/2321 | 5/18352 | 0.4914288 | 0.6907939 | 0.6522977 | 1 | EHMT2   |
| Molecular Function | GO:0046978 | TAP1 binding                                                                                 | 1/2321 | 5/18352 | 0.4914288 | 0.6907939 | 0.6522977 | 1 | HLA-F   |

|                    |            |                                                               |        |         |           |           |           |   |        |
|--------------------|------------|---------------------------------------------------------------|--------|---------|-----------|-----------|-----------|---|--------|
| Molecular Function | GO:0047086 | ketosteroid monooxygenase activity                            | 1/2321 | 5/18352 | 0.4914288 | 0.6907939 | 0.6522977 | 1 | AKR1D1 |
| Molecular Function | GO:0047184 | 1-acylglycerophosphocholine O-acyltransferase activity        | 1/2321 | 5/18352 | 0.4914288 | 0.6907939 | 0.6522977 | 1 | LPCAT1 |
| Molecular Function | GO:0048273 | mitogen-activated protein kinase p38 binding                  | 1/2321 | 5/18352 | 0.4914288 | 0.6907939 | 0.6522977 | 1 | NFATC1 |
| Molecular Function | GO:0050051 | leukotriene-B4 20-monooxygenase activity                      | 1/2321 | 5/18352 | 0.4914288 | 0.6907939 | 0.6522977 | 1 | CYP4F3 |
| Molecular Function | GO:0051373 | FAT2 binding                                                  | 1/2321 | 5/18352 | 0.4914288 | 0.6907939 | 0.6522977 | 1 | MYOZ3  |
| Molecular Function | GO:0051766 | inositol trisphosphate kinase activity                        | 1/2321 | 5/18352 | 0.4914288 | 0.6907939 | 0.6522977 | 1 | ITPKB  |
| Molecular Function | GO:0052812 | phosphatidylinositol-3,4-bisphosphate 5-kinase activity       | 1/2321 | 5/18352 | 0.4914288 | 0.6907939 | 0.6522977 | 1 | PIK3CD |
| Molecular Function | GO:0052840 | inositol diphosphate tetrakisphosphate diphosphatase activity | 1/2321 | 5/18352 | 0.4914288 | 0.6907939 | 0.6522977 | 1 | NUDT3  |
| Molecular Function | GO:0052842 | inositol diphosphate pentakisphosphate diphosphatase activity | 1/2321 | 5/18352 | 0.4914288 | 0.6907939 | 0.6522977 | 1 | NUDT3  |

|                    |            |                                                                                             |        |         |           |           |           |   |         |
|--------------------|------------|---------------------------------------------------------------------------------------------|--------|---------|-----------|-----------|-----------|---|---------|
| Molecular Function | GO:0070004 | cysteine-type exopeptidase activity                                                         | 1/2321 | 5/18352 | 0.4914288 | 0.6907939 | 0.6522977 | 1 | MINDY1  |
| Molecular Function | GO:0070061 | fructose binding                                                                            | 1/2321 | 5/18352 | 0.4914288 | 0.6907939 | 0.6522977 | 1 | SLC2A5  |
| Molecular Function | GO:0070915 | lysophosphatidic acid receptor activity                                                     | 1/2321 | 5/18352 | 0.4914288 | 0.6907939 | 0.6522977 | 1 | LPAR2   |
| Molecular Function | GO:0071532 | ankyrin repeat binding                                                                      | 1/2321 | 5/18352 | 0.4914288 | 0.6907939 | 0.6522977 | 1 | RELA    |
| Molecular Function | GO:0071558 | histone demethylase activity (H3-K27 specific)                                              | 1/2321 | 5/18352 | 0.4914288 | 0.6907939 | 0.6522977 | 1 | KDM7A   |
| Molecular Function | GO:0071987 | WD40-repeat domain binding                                                                  | 1/2321 | 5/18352 | 0.4914288 | 0.6907939 | 0.6522977 | 1 | CCT6A   |
| Molecular Function | GO:0072345 | NAADP-sensitive calcium-release channel activity                                            | 1/2321 | 5/18352 | 0.4914288 | 0.6907939 | 0.6522977 | 1 | TPCN2   |
| Molecular Function | GO:0086007 | voltage-gated calcium channel activity involved in cardiac muscle cell action potential     | 1/2321 | 5/18352 | 0.4914288 | 0.6907939 | 0.6522977 | 1 | CACNA1C |
| Molecular Function | GO:0086083 | cell adhesive protein binding involved in bundle of His cell-Purkinje myocyte communication | 1/2321 | 5/18352 | 0.4914288 | 0.6907939 | 0.6522977 | 1 | JUP     |

|                    |            |                                                           |         |           |           |           |           |    |                                                                                                                                                                                    |             |
|--------------------|------------|-----------------------------------------------------------|---------|-----------|-----------|-----------|-----------|----|------------------------------------------------------------------------------------------------------------------------------------------------------------------------------------|-------------|
| Molecular Function | GO:0098973 | structural constituent of postsynaptic actin cytoskeleton | 1/2321  | 5/18352   | 0.4914288 | 0.6907939 | 0.6522977 | 1  |                                                                                                                                                                                    | ACTG1       |
| Molecular Function | GO:0102953 | hypoglycin A gamma-glutamyl transpeptidase activity       | 1/2321  | 5/18352   | 0.4914288 | 0.6907939 | 0.6522977 | 1  |                                                                                                                                                                                    | GGT1        |
| Molecular Function | GO:0103068 | leukotriene C4 gamma-glutamyl transferase activity        | 1/2321  | 5/18352   | 0.4914288 | 0.6907939 | 0.6522977 | 1  |                                                                                                                                                                                    | GGT1        |
| Molecular Function | GO:0120170 | intraciliary transport particle B binding                 | 1/2321  | 5/18352   | 0.4914288 | 0.6907939 | 0.6522977 | 1  |                                                                                                                                                                                    | KIFAP3      |
| Molecular Function | GO:1990446 | U1 snRNP binding                                          | 1/2321  | 5/18352   | 0.4914288 | 0.6907939 | 0.6522977 | 1  |                                                                                                                                                                                    | SNRPD3      |
| Molecular Function | GO:0004518 | nuclease activity                                         | 27/2321 | 210/18352 | 0.4947223 | 0.6949747 | 0.6562455 | 27 | RNASE3/POLE/EXOSC2/ERN1/CPSF3/TDP1/SLFN14/RCL1/ZC3H12D/EME1/MEIOB/AGO2/EDC3/NOB1/NTHL1/ERI3/SMG6/DFFB/RMRP/DNASE1L3/DIS3L2/PLD3/ERCC1/SND1/SLX4/TOE1/ISG20                         |             |
| Molecular Function | GO:0008168 | methyltransferase activity                                | 28/2321 | 218/18352 | 0.4957919 | 0.6960278 | 0.6572399 | 28 | METTL21A/PRMT2/ASH2L/SETD2/SMYD3/COMT/EHMT2/WDR82/METTL6/KMT2D/TPMT/SETD1B/PRDM2/SETD1A/METTL22/PRDM16/DNMT1/SMYD4/NTMT1/FBL/HNMT/MECOM/METTL8/EEF1AKMT3/EEF1AKMT2/NSD3/NSD2/CSKMT |             |
| Molecular Function | GO:0003725 | double-stranded RNA binding                               | 10/2321 | 76/18352  | 0.4981359 | 0.6988676 | 0.6599214 | 10 | AGO1/STAU2/TUBB4B/ACTN1/PRKRIP1/AGO2/ZFR/DUS2/ILF3/ZFR2                                                                                                                            |             |
| Molecular Function | GO:0003906 | DNA-(apurinic or apyrimidinic site) endonuclease activity | 2/2321  | 13/18352  | 0.5031014 | 0.6999672 | 0.6609597 | 2  |                                                                                                                                                                                    | NEIL3/NTHL1 |

|                    |            |                                                                      |        |          |           |           |           |   |                 |
|--------------------|------------|----------------------------------------------------------------------|--------|----------|-----------|-----------|-----------|---|-----------------|
| Molecular Function | GO:0008179 | adenylate cyclase binding                                            | 2/2321 | 13/18352 | 0.5031014 | 0.6999672 | 0.6609597 | 2 | ADCY2/AKAP5     |
| Molecular Function | GO:0008195 | phosphatidate phosphatase activity                                   | 2/2321 | 13/18352 | 0.5031014 | 0.6999672 | 0.6609597 | 2 | LPIN1/PLPP3     |
| Molecular Function | GO:0008253 | 5'-nucleotidase activity                                             | 2/2321 | 13/18352 | 0.5031014 | 0.6999672 | 0.6609597 | 2 | NT5DC3/ACP3     |
| Molecular Function | GO:0008271 | secondary active sulfate transmembrane transporter activity          | 2/2321 | 13/18352 | 0.5031014 | 0.6999672 | 0.6609597 | 2 | SLC13A4/SLC26A1 |
| Molecular Function | GO:0016175 | superoxide-generating NAD(P)H oxidase activity                       | 2/2321 | 13/18352 | 0.5031014 | 0.6999672 | 0.6609597 | 2 | NCF4/NCF2       |
| Molecular Function | GO:0016653 | oxidoreductase activity, acting on NAD(P)H, heme protein as acceptor | 2/2321 | 13/18352 | 0.5031014 | 0.6999672 | 0.6609597 | 2 | POR/CYB5RL      |
| Molecular Function | GO:0016840 | carbon-nitrogen lyase activity                                       | 2/2321 | 13/18352 | 0.5031014 | 0.6999672 | 0.6609597 | 2 | HAL/APMAP       |
| Molecular Function | GO:0031994 | insulin-like growth factor I binding                                 | 2/2321 | 13/18352 | 0.5031014 | 0.6999672 | 0.6609597 | 2 | IGF1R/ITGB3     |
| Molecular Function | GO:0034450 | ubiquitin-ubiquitin ligase activity                                  | 2/2321 | 13/18352 | 0.5031014 | 0.6999672 | 0.6609597 | 2 | AMFR/PELI1      |

|                    |            |                                                            |         |           |           |           |           |    |                                                                                     |
|--------------------|------------|------------------------------------------------------------|---------|-----------|-----------|-----------|-----------|----|-------------------------------------------------------------------------------------|
| Molecular Function | GO:0045159 | myosin II binding                                          | 2/2321  | 13/18352  | 0.5031014 | 0.6999672 | 0.6609597 | 2  | GSN/SHROOM1                                                                         |
| Molecular Function | GO:0086080 | protein binding involved in heterotypic cell-cell adhesion | 2/2321  | 13/18352  | 0.5031014 | 0.6999672 | 0.6609597 | 2  | JUP/GLDN                                                                            |
| Molecular Function | GO:0097617 | annealing activity                                         | 2/2321  | 13/18352  | 0.5031014 | 0.6999672 | 0.6609597 | 2  | BLM/SMARCAL1                                                                        |
| Molecular Function | GO:0099094 | ligand-gated cation channel activity                       | 14/2321 | 108/18352 | 0.5040055 | 0.700777  | 0.6617244 | 14 | TRPM2/KCNJ15/ITPR2/ITPR1/RASA3/GRIK4/KCNK6/ASIC4/AQP1/HTR3A/CNGA4/TPCN2/P2RX1/P2RX5 |
| Molecular Function | GO:0001614 | purinergic nucleotide receptor activity                    | 3/2321  | 21/18352  | 0.5065802 | 0.7030093 | 0.6638323 | 3  | P2RY6/P2RX1/P2RX5                                                                   |
| Molecular Function | GO:0016502 | nucleotide receptor activity                               | 3/2321  | 21/18352  | 0.5065802 | 0.7030093 | 0.6638323 | 3  | P2RY6/P2RX1/P2RX5                                                                   |
| Molecular Function | GO:0016881 | acid-amino acid ligase activity                            | 3/2321  | 21/18352  | 0.5065802 | 0.7030093 | 0.6638323 | 3  | TLL4/TLL11/TLL1                                                                     |
| Molecular Function | GO:0000146 | microfilament motor activity                               | 4/2321  | 29/18352  | 0.5086596 | 0.704547  | 0.6652843 | 4  | MYO9B/MYH9/MYO5A/MYO1C                                                              |
| Molecular Function | GO:0004806 | triglyceride lipase activity                               | 4/2321  | 29/18352  | 0.5086596 | 0.704547  | 0.6652843 | 4  | PNPLA2/PLA2G15/LIPC/PLA1A                                                           |

|                    |            |                                                                                                                                                                      |         |           |           |           |           |    |                                                                                                         |
|--------------------|------------|----------------------------------------------------------------------------------------------------------------------------------------------------------------------|---------|-----------|-----------|-----------|-----------|----|---------------------------------------------------------------------------------------------------------|
| Molecular Function | GO:0008187 | poly-pyrimidine tract binding                                                                                                                                        | 4/2321  | 29/18352  | 0.5086596 | 0.704547  | 0.6652843 | 4  | PABPC4/ATXN1/DAZAP1/DIS3L2                                                                              |
| Molecular Function | GO:0016709 | oxidoreductase activity, acting on paired donors, with incorporation or reduction of molecular oxygen, NAD(P)H as one donor, and incorporation of one atom of oxygen | 6/2321  | 45/18352  | 0.5115255 | 0.7080658 | 0.668607  | 6  | MICAL1/MICAL2/MICAL3/AKR1D1/CYP4F3/POR                                                                  |
| Molecular Function | GO:0001540 | amyloid-beta binding                                                                                                                                                 | 10/2321 | 77/18352  | 0.5155191 | 0.7131402 | 0.6733987 | 10 | SORL1/APBB2/FPR2/CLU/APBA2/MARCO/ITM2C/MAPK8IP2/ITGB2/CACNA1B                                           |
| Molecular Function | GO:0048306 | calcium-dependent protein binding                                                                                                                                    | 11/2321 | 85/18352  | 0.5163484 | 0.7138336 | 0.6740534 | 11 | S100P/S100A8/CASQ2/CD177/ANXA6/TNNT3/MASP1/S100A5/CABP1/ANXA7/SEC31A                                    |
| Molecular Function | GO:0016651 | oxidoreductase activity, acting on NAD(P)H                                                                                                                           | 14/2321 | 109/18352 | 0.5186019 | 0.7160392 | 0.676136  | 14 | NCF4/MICAL1/MICAL2/NDUFS2/NCF2/NDUFS8/POR/AIFM2/CYB5RL/NXN/GMPR2/NDUFB6/TP53I3/TXNRD2                   |
| Molecular Function | GO:0090079 | translation regulator activity, nucleic acid binding                                                                                                                 | 14/2321 | 109/18352 | 0.5186019 | 0.7160392 | 0.676136  | 14 | EIF2B5/LARP1/CTIF/AGO2/MIF4GD/RARA/EIF3M/COPSS/CPEB3/CELF1/PAIP1/EIF3H/EIF4G1/EEF1D                     |
| Molecular Function | GO:0016779 | nucleotidyltransferase activity                                                                                                                                      | 17/2321 | 133/18352 | 0.5206011 | 0.7183437 | 0.6783122 | 17 | PCYT1A/POLE/POLR2F/NMNAT3/CRCP/RMRP/PAPSS2/POLD3/TUT1/CDS2/PAPOLG/POLE4/RPAP1/POLI/POLR1D/TENT5C/TENT5A |
| Molecular Function | GO:0031491 | nucleosome binding                                                                                                                                                   | 9/2321  | 70/18352  | 0.5327912 | 0.7342329 | 0.6933159 | 9  | MLLT10/CABIN1/RCC1/UHRF1/HDAC1/SPHK2/ARID1B/MTA2/SMARCD2                                                |
| Molecular Function | GO:0042379 | chemokine receptor binding                                                                                                                                           | 9/2321  | 70/18352  | 0.5327912 | 0.7342329 | 0.6933159 | 9  | CCR2/CCL5/DEFB1/CCL20/C10orf99/CNIH4/CCL27/CCL22/YARS1                                                  |



|                    |            |                                                                 |         |           |           |           |           |    |                                                                                                                                                                                                                                                                                                  |
|--------------------|------------|-----------------------------------------------------------------|---------|-----------|-----------|-----------|-----------|----|--------------------------------------------------------------------------------------------------------------------------------------------------------------------------------------------------------------------------------------------------------------------------------------------------|
| Molecular Function | GO:0004177 | aminopeptidase activity                                         | 6/2321  | 46/18352  | 0.5339426 | 0.7353539 | 0.6943745 | 6  | LNPEP/CTSH/DPP3/XPNPEP1/RNPEPL1/AOPEP                                                                                                                                                                                                                                                            |
| Molecular Function | GO:0016896 | exoribonuclease activity,<br>producing 5'-<br>phosphomonoesters | 5/2321  | 38/18352  | 0.5349079 | 0.736122  | 0.6950997 | 5  | EXOSC2/ERI3/DIS3L2/TOE1/ISG20                                                                                                                                                                                                                                                                    |
| Molecular Function | GO:0033218 | amide binding                                                   | 48/2321 | 381/18352 | 0.5351769 | 0.736122  | 0.6950997 | 48 | RXRA/SORL1/CALR/PPARG/APBB2/FKBP5/LNPEP/MAML1/PIK3R1/TNPO1/FOLR3/FPR2/NFATC1/HLA-C/PLTP/MTHFS/HLA-F/ACOT7/CLU/IGF1R/APBA2/PC/MARCO/CRHBP/SLC19A1/GIPR/SLC7A5/ITM2C/ACACB/TRGV9/MGST2/CAT/MAPK8IP2/ACBD3/ITGB2/NOD2/CABP1/HMGCL/SLC7A8/VIPR2/CACNA1B/CRIP1/RELA/NPFFR1/INHBA/C2CD2L/ACADVL/BABAM2 |
| Molecular Function | GO:0030332 | cyclin binding                                                  | 4/2321  | 30/18352  | 0.5364766 | 0.7369779 | 0.695908  | 4  | CUL3/CDK14/USP2/CDK13                                                                                                                                                                                                                                                                            |
| Molecular Function | GO:0070273 | phosphatidylinositol-4-<br>phosphate binding                    | 4/2321  | 30/18352  | 0.5364766 | 0.7369779 | 0.695908  | 4  | OSBPL5/SH3PXD2B/SNX3/RUBCNL                                                                                                                                                                                                                                                                      |
| Molecular Function | GO:0005540 | hyaluronic acid binding                                         | 3/2321  | 22/18352  | 0.539144  | 0.7371521 | 0.6960724 | 3  | TNFAIP6/STAB2/LYVE1                                                                                                                                                                                                                                                                              |
| Molecular Function | GO:0015296 | anion:cation symporter<br>activity                              | 3/2321  | 22/18352  | 0.539144  | 0.7371521 | 0.6960724 | 3  | SLC13A4/SLC12A1/SLC12A7                                                                                                                                                                                                                                                                          |
| Molecular Function | GO:0016849 | phosphorus-oxygen lyase<br>activity                             | 3/2321  | 22/18352  | 0.539144  | 0.7371521 | 0.6960724 | 3  | ADCY2/ADCY9/ADCY4                                                                                                                                                                                                                                                                                |
| Molecular Function | GO:0042288 | MHC class I protein binding                                     | 3/2321  | 22/18352  | 0.539144  | 0.7371521 | 0.6960724 | 3  | PILRA/PILRB/TUBB4B                                                                                                                                                                                                                                                                               |

|                    |            |                                       |        |          |           |           |           |   |                  |
|--------------------|------------|---------------------------------------|--------|----------|-----------|-----------|-----------|---|------------------|
| Molecular Function | GO:0070034 | telomerase RNA binding                | 3/2321 | 22/18352 | 0.539144  | 0.7371521 | 0.6960724 | 3 | SNRPD3/SMG7/SMG6 |
| Molecular Function | GO:0070577 | lysine-acetylated histone binding     | 3/2321 | 22/18352 | 0.539144  | 0.7371521 | 0.6960724 | 3 | BRD4/ZMYND8/BRD2 |
| Molecular Function | GO:0140033 | acetylation-dependent protein binding | 3/2321 | 22/18352 | 0.539144  | 0.7371521 | 0.6960724 | 3 | BRD4/ZMYND8/BRD2 |
| Molecular Function | GO:0005344 | oxygen carrier activity               | 2/2321 | 14/18352 | 0.5441626 | 0.7371521 | 0.6960724 | 2 | HBB/MB           |
| Molecular Function | GO:0005545 | 1-phosphatidylinositol binding        | 2/2321 | 14/18352 | 0.5441626 | 0.7371521 | 0.6960724 | 2 | WDFY1/ZFYVE9     |
| Molecular Function | GO:0015373 | anion:sodium symporter activity       | 2/2321 | 14/18352 | 0.5441626 | 0.7371521 | 0.6960724 | 2 | SLC13A4/SLC12A1  |
| Molecular Function | GO:0031432 | titin binding                         | 2/2321 | 14/18352 | 0.5441626 | 0.7371521 | 0.6960724 | 2 | ANKRD2/ANKRD1    |
| Molecular Function | GO:0033549 | MAP kinase phosphatase activity       | 2/2321 | 14/18352 | 0.5441626 | 0.7371521 | 0.6960724 | 2 | DUSP14/DUSP3     |
| Molecular Function | GO:0044548 | S100 protein binding                  | 2/2321 | 14/18352 | 0.5441626 | 0.7371521 | 0.6960724 | 2 | AHNAK/EZR        |

|                    |            |                                                                    |         |           |           |           |           |    |                                                                                                      |
|--------------------|------------|--------------------------------------------------------------------|---------|-----------|-----------|-----------|-----------|----|------------------------------------------------------------------------------------------------------|
| Molecular Function | GO:0046624 | sphingolipid transporter activity                                  | 2/2321  | 14/18352  | 0.5441626 | 0.7371521 | 0.6960724 | 2  | PLTP/ABCA1                                                                                           |
| Molecular Function | GO:0070403 | NAD+ binding                                                       | 2/2321  | 14/18352  | 0.5441626 | 0.7371521 | 0.6960724 | 2  | UXS1/SIRT3                                                                                           |
| Molecular Function | GO:1990756 | ubiquitin ligase-substrate adaptor activity                        | 2/2321  | 14/18352  | 0.5441626 | 0.7371521 | 0.6960724 | 2  | ARRDC5/FBXO7                                                                                         |
| Molecular Function | GO:0140375 | immune receptor activity                                           | 17/2321 | 135/18352 | 0.5467324 | 0.7371521 | 0.6960724 | 17 | C3AR1/CSF2RB/CSF3R/IL1R1/CCR2/FPR2/FPR1/ACKR2/CTSH/C5AR2/CCR9/CXCR1/IL6R/IL18RAP/IL18R1/CRLF1/CX3CR1 |
| Molecular Function | GO:0004519 | endonuclease activity                                              | 16/2321 | 127/18352 | 0.5468988 | 0.7371521 | 0.6960724 | 16 | RNASE3/ERN1/CPSF3/SLFN14/RCL1/ZC3H12D/EME1/AGO2/EDC3/NOB1/NTHL1/SMG6/DNASE1L3/ERCC1/SND1/SLX4        |
| Molecular Function | GO:0001181 | RNA polymerase I general transcription initiation factor activity  | 1/2321  | 6/18352   | 0.5557659 | 0.7371521 | 0.6960724 | 1  | TAF1C                                                                                                |
| Molecular Function | GO:0001665 | alpha-N-acetylgalactosaminide alpha-2,6-sialyltransferase activity | 1/2321  | 6/18352   | 0.5557659 | 0.7371521 | 0.6960724 | 1  | ST6GALNAC1                                                                                           |
| Molecular Function | GO:0003828 | alpha-N-acetylneuraminide alpha-2,8-sialyltransferase activity     | 1/2321  | 6/18352   | 0.5557659 | 0.7371521 | 0.6960724 | 1  | ST8SIA6                                                                                              |
| Molecular Function | GO:0003958 | NADPH-hemoprotein reductase activity                               | 1/2321  | 6/18352   | 0.5557659 | 0.7371521 | 0.6960724 | 1  | POR                                                                                                  |

|                    |            |                                                        |        |         |           |           |           |   |         |
|--------------------|------------|--------------------------------------------------------|--------|---------|-----------|-----------|-----------|---|---------|
| Molecular Function | GO:0004301 | epoxide hydrolase activity                             | 1/2321 | 6/18352 | 0.5557659 | 0.7371521 | 0.6960724 | 1 | EPHX1   |
| Molecular Function | GO:0004576 | oligosaccharyl transferase activity                    | 1/2321 | 6/18352 | 0.5557659 | 0.7371521 | 0.6960724 | 1 | RPN1    |
| Molecular Function | GO:0004767 | sphingomyelin phosphodiesterase activity               | 1/2321 | 6/18352 | 0.5557659 | 0.7371521 | 0.6960724 | 1 | SMPDL3B |
| Molecular Function | GO:0005345 | purine nucleobase transmembrane transporter activity   | 1/2321 | 6/18352 | 0.5557659 | 0.7371521 | 0.6960724 | 1 | AQP9    |
| Molecular Function | GO:0008048 | calcium sensitive guanylate cyclase activator activity | 1/2321 | 6/18352 | 0.5557659 | 0.7371521 | 0.6960724 | 1 | RCVRN   |
| Molecular Function | GO:0008410 | CoA-transferase activity                               | 1/2321 | 6/18352 | 0.5557659 | 0.7371521 | 0.6960724 | 1 | AMACR   |
| Molecular Function | GO:0008508 | bile acid:sodium symporter activity                    | 1/2321 | 6/18352 | 0.5557659 | 0.7371521 | 0.6960724 | 1 | SLC10A1 |
| Molecular Function | GO:0008821 | crossover junction endodeoxyribonuclease activity      | 1/2321 | 6/18352 | 0.5557659 | 0.7371521 | 0.6960724 | 1 | SLX4    |
| Molecular Function | GO:0009008 | DNA-methyltransferase activity                         | 1/2321 | 6/18352 | 0.5557659 | 0.7371521 | 0.6960724 | 1 | DNMT1   |

|                    |            |                                                               |        |         |           |           |           |   |        |
|--------------------|------------|---------------------------------------------------------------|--------|---------|-----------|-----------|-----------|---|--------|
| Molecular Function | GO:0015189 | L-lysine transmembrane transporter activity                   | 1/2321 | 6/18352 | 0.5557659 | 0.7371521 | 0.6960724 | 1 | SLC7A1 |
| Molecular Function | GO:0015616 | DNA translocase activity                                      | 1/2321 | 6/18352 | 0.5557659 | 0.7371521 | 0.6960724 | 1 | FBH1   |
| Molecular Function | GO:0016160 | amylase activity                                              | 1/2321 | 6/18352 | 0.5557659 | 0.7371521 | 0.6960724 | 1 | MGAM   |
| Molecular Function | GO:0016406 | carnitine O-acyltransferase activity                          | 1/2321 | 6/18352 | 0.5557659 | 0.7371521 | 0.6960724 | 1 | CPT1A  |
| Molecular Function | GO:0016530 | metallochaperone activity                                     | 1/2321 | 6/18352 | 0.5557659 | 0.7371521 | 0.6960724 | 1 | ATOX1  |
| Molecular Function | GO:0017176 | phosphatidylinositol N-acetylglucosaminyltransferase activity | 1/2321 | 6/18352 | 0.5557659 | 0.7371521 | 0.6960724 | 1 | PIGQ   |
| Molecular Function | GO:0019958 | C-X-C chemokine binding                                       | 1/2321 | 6/18352 | 0.5557659 | 0.7371521 | 0.6960724 | 1 | CXCR1  |
| Molecular Function | GO:0031682 | G-protein gamma-subunit binding                               | 1/2321 | 6/18352 | 0.5557659 | 0.7371521 | 0.6960724 | 1 | GNB3   |
| Molecular Function | GO:0031727 | CCR2 chemokine receptor binding                               | 1/2321 | 6/18352 | 0.5557659 | 0.7371521 | 0.6960724 | 1 | CCR2   |

|                    |            |                                                                                |        |         |           |           |           |   |        |
|--------------------|------------|--------------------------------------------------------------------------------|--------|---------|-----------|-----------|-----------|---|--------|
| Molecular Function | GO:0034190 | apolipoprotein receptor binding                                                | 1/2321 | 6/18352 | 0.5557659 | 0.7371521 | 0.6960724 | 1 | NR1H2  |
| Molecular Function | GO:0035174 | histone serine kinase activity                                                 | 1/2321 | 6/18352 | 0.5557659 | 0.7371521 | 0.6960724 | 1 | PRKAA1 |
| Molecular Function | GO:0035673 | oligopeptide transmembrane transporter activity                                | 1/2321 | 6/18352 | 0.5557659 | 0.7371521 | 0.6960724 | 1 | ABCC1  |
| Molecular Function | GO:0043515 | kinetochore binding                                                            | 1/2321 | 6/18352 | 0.5557659 | 0.7371521 | 0.6960724 | 1 | MAD1L1 |
| Molecular Function | GO:0043878 | glyceraldehyde-3-phosphate dehydrogenase (NAD+) (non-phosphorylating) activity | 1/2321 | 6/18352 | 0.5557659 | 0.7371521 | 0.6960724 | 1 | ALDH2  |
| Molecular Function | GO:0045131 | pre-mRNA branch point binding                                                  | 1/2321 | 6/18352 | 0.5557659 | 0.7371521 | 0.6960724 | 1 | SF1    |
| Molecular Function | GO:0050656 | 3'-phosphoadenosine 5'-phosphosulfate binding                                  | 1/2321 | 6/18352 | 0.5557659 | 0.7371521 | 0.6960724 | 1 | CHST15 |
| Molecular Function | GO:0051429 | corticotropin-releasing hormone receptor binding                               | 1/2321 | 6/18352 | 0.5557659 | 0.7371521 | 0.6960724 | 1 | GNAO1  |
| Molecular Function | GO:0055056 | D-glucose transmembrane transporter activity                                   | 1/2321 | 6/18352 | 0.5557659 | 0.7371521 | 0.6960724 | 1 | SLC2A1 |

|                    |            |                                                                                     |        |          |           |           |           |   |                                       |
|--------------------|------------|-------------------------------------------------------------------------------------|--------|----------|-----------|-----------|-----------|---|---------------------------------------|
| Molecular Function | GO:0061459 | L-arginine transmembrane transporter activity                                       | 1/2321 | 6/18352  | 0.5557659 | 0.7371521 | 0.6960724 | 1 | SLC7A1                                |
| Molecular Function | GO:0071253 | connexin binding                                                                    | 1/2321 | 6/18352  | 0.5557659 | 0.7371521 | 0.6960724 | 1 | GJA5                                  |
| Molecular Function | GO:0090599 | alpha-glucosidase activity                                                          | 1/2321 | 6/18352  | 0.5557659 | 0.7371521 | 0.6960724 | 1 | MGAM                                  |
| Molecular Function | GO:0097642 | calcitonin family receptor activity                                                 | 1/2321 | 6/18352  | 0.5557659 | 0.7371521 | 0.6960724 | 1 | CRCP                                  |
| Molecular Function | GO:1903763 | gap junction channel activity involved in cell communication by electrical coupling | 1/2321 | 6/18352  | 0.5557659 | 0.7371521 | 0.6960724 | 1 | GJA5                                  |
| Molecular Function | GO:1905394 | retromer complex binding                                                            | 1/2321 | 6/18352  | 0.5557659 | 0.7371521 | 0.6960724 | 1 | SORT1                                 |
| Molecular Function | GO:1990050 | phosphatidic acid transfer activity                                                 | 1/2321 | 6/18352  | 0.5557659 | 0.7371521 | 0.6960724 | 1 | PLTP                                  |
| Molecular Function | GO:0005044 | scavenger receptor activity                                                         | 6/2321 | 47/18352 | 0.555913  | 0.7371521 | 0.6960724 | 6 | LOXL3/ACKR2/COLEC12/MARCO/STAB2/LOXL4 |
| Molecular Function | GO:0005547 | phosphatidylinositol-3,4,5-trisphosphate binding                                    | 5/2321 | 39/18352 | 0.5590067 | 0.740803  | 0.6995199 | 5 | ADAP1/GAB2/ARAP1/ASAP1/DAPP1          |

|                    |            |                                                            |        |          |           |           |           |   |                                                            |
|--------------------|------------|------------------------------------------------------------|--------|----------|-----------|-----------|-----------|---|------------------------------------------------------------|
| Molecular Function | GO:0015216 | purine nucleotide<br>transmembrane transporter<br>activity | 4/2321 | 31/18352 | 0.5634758 | 0.7453637 | 0.7038264 | 4 | SLC25A25/SLC33A1/ABCC11/SLC25A1                            |
| Molecular Function | GO:0050699 | WW domain binding                                          | 4/2321 | 31/18352 | 0.5634758 | 0.7453637 | 0.7038264 | 4 | DNM2/LITAF/RAPGEF2/DAZAP2                                  |
| Molecular Function | GO:0140142 | nucleocytoplasmic carrier<br>activity                      | 4/2321 | 31/18352 | 0.5634758 | 0.7453637 | 0.7038264 | 4 | TNPO1/XPO7/XPO6/SNUPN                                      |
| Molecular Function | GO:0030971 | receptor tyrosine kinase<br>binding                        | 9/2321 | 72/18352 | 0.5683204 | 0.7508593 | 0.7090158 | 9 | ANGPT1/PIK3R1/GAB2/PITPNM2/DOK2/PITPNM1/DUSP3/PLCG1/DAZAP2 |
| Molecular Function | GO:0033293 | monocarboxylic acid binding                                | 9/2321 | 72/18352 | 0.5683204 | 0.7508593 | 0.7090158 | 9 | S100A8/RXRA/PPARG/VDR/ACOXL/PC/RARA/ACACB/ACOX2            |
| Molecular Function | GO:0003688 | DNA replication origin<br>binding                          | 3/2321 | 23/18352 | 0.5704343 | 0.7509165 | 0.7090698 | 3 | MCM5/MCM2/KAT7                                             |
| Molecular Function | GO:0005158 | insulin receptor binding                                   | 3/2321 | 23/18352 | 0.5704343 | 0.7509165 | 0.7090698 | 3 | PIK3R1/GRB10/IGF1R                                         |
| Molecular Function | GO:0008143 | poly(A) binding                                            | 3/2321 | 23/18352 | 0.5704343 | 0.7509165 | 0.7090698 | 3 | PABPC4/RBPMS/SYNCRIP                                       |
| Molecular Function | GO:0017134 | fibroblast growth factor<br>binding                        | 3/2321 | 23/18352 | 0.5704343 | 0.7509165 | 0.7090698 | 3 | THBS1/FGFR1/ITGB3                                          |



|                    |            |                               |         |          |           |           |           |    |                                                                           |
|--------------------|------------|-------------------------------|---------|----------|-----------|-----------|-----------|----|---------------------------------------------------------------------------|
| Molecular Function | GO:0030742 | GTP-dependent protein binding | 3/2321  | 23/18352 | 0.5704343 | 0.7509165 | 0.7090698 | 3  | RAB5B/DNM1L/HPS6                                                          |
| Molecular Function | GO:0070840 | dynein complex binding        | 3/2321  | 23/18352 | 0.5704343 | 0.7509165 | 0.7090698 | 3  | BICD2/NUMA1/FBXW11                                                        |
| Molecular Function | GO:0008408 | 3'-5' exonuclease activity    | 7/2321  | 56/18352 | 0.5735933 | 0.7546186 | 0.7125655 | 7  | POLE/EXOSC2/MEIOB/ERI3/DIS3L2/TOE1/ISG20                                  |
| Molecular Function | GO:0004896 | cytokine receptor activity    | 12/2321 | 97/18352 | 0.5786962 | 0.7608719 | 0.7184703 | 12 | CSF2RB/CSF3R/IL1R1/CCR2/ACKR2/CCR9/CXCR1/IL6R/IL18RAP/IL18R1/CRLF1/CX3CR1 |
| Molecular Function | GO:0004532 | exoribonuclease activity      | 5/2321  | 40/18352 | 0.5824636 | 0.7611957 | 0.7187761 | 5  | EXOSC2/ERI3/DIS3L2/TOE1/ISG20                                             |
| Molecular Function | GO:0016790 | thiolester hydrolase activity | 5/2321  | 40/18352 | 0.5824636 | 0.7611957 | 0.7187761 | 5  | ABHD16A/ACOT13/ACOT7/ABHD16B/LYPLA2                                       |
| Molecular Function | GO:0008252 | nucleotidase activity         | 2/2321  | 15/18352 | 0.5827904 | 0.7611957 | 0.7187761 | 2  | NT5DC3/ACP3                                                               |
| Molecular Function | GO:0015929 | hexosaminidase activity       | 2/2321  | 15/18352 | 0.5827904 | 0.7611957 | 0.7187761 | 2  | HEXB/CEMIP2                                                               |
| Molecular Function | GO:0016846 | carbon-sulfur lyase activity  | 2/2321  | 15/18352 | 0.5827904 | 0.7611957 | 0.7187761 | 2  | MGST2/SCLY                                                                |

|                    |            |                                                                                                          |         |           |           |           |           |    |                                                                                                                                                                                                                                                                                                                                                                                  |
|--------------------|------------|----------------------------------------------------------------------------------------------------------|---------|-----------|-----------|-----------|-----------|----|----------------------------------------------------------------------------------------------------------------------------------------------------------------------------------------------------------------------------------------------------------------------------------------------------------------------------------------------------------------------------------|
| Molecular Function | GO:0030553 | cGMP binding                                                                                             | 2/2321  | 15/18352  | 0.5827904 | 0.7611957 | 0.7187761 | 2  | CNGA4/PDE6H                                                                                                                                                                                                                                                                                                                                                                      |
| Molecular Function | GO:0034483 | heparan sulfate sulfotransferase activity                                                                | 2/2321  | 15/18352  | 0.5827904 | 0.7611957 | 0.7187761 | 2  | HS3ST3B1/NDST1                                                                                                                                                                                                                                                                                                                                                                   |
| Molecular Function | GO:0036041 | long-chain fatty acid binding                                                                            | 2/2321  | 15/18352  | 0.5827904 | 0.7611957 | 0.7187761 | 2  | S100A8/PPARG                                                                                                                                                                                                                                                                                                                                                                     |
| Molecular Function | GO:0042809 | vitamin D receptor binding                                                                               | 2/2321  | 15/18352  | 0.5827904 | 0.7611957 | 0.7187761 | 2  | RXRA/MED13                                                                                                                                                                                                                                                                                                                                                                       |
| Molecular Function | GO:0086008 | voltage-gated potassium channel activity involved in cardiac muscle cell action potential repolarization | 2/2321  | 15/18352  | 0.5827904 | 0.7611957 | 0.7187761 | 2  | KCNE1/KCNQ1                                                                                                                                                                                                                                                                                                                                                                      |
| Molecular Function | GO:0097153 | cysteine-type endopeptidase activity involved in apoptotic process                                       | 2/2321  | 15/18352  | 0.5827904 | 0.7611957 | 0.7187761 | 2  | CASP7/CASP1                                                                                                                                                                                                                                                                                                                                                                      |
| Molecular Function | GO:0046873 | metal ion transmembrane transporter activity                                                             | 53/2321 | 428/18352 | 0.5883075 | 0.7679407 | 0.7251452 | 53 | TRPM2/KCNJ15/SLC25A37/KCNE1/SLC39A11/KCNAB2/ITPR2/SLC10A1/MFSD2A/FXYD2/CACNA1C/SLC11A1/CACNA2D4/SLC24A4/SLC8A1/PKD1L1/ANXA6/KCNN1/KCNQ2/ATP2B2/ITPR1/SLC11A2/TRPM6/RASA3/KCNIP1/NIPAL3/GRIK4/SCN1A/KCNK6/SLC13A4/ASIC4/AQP1/SLC1A2/ATP2A3/ZDHHC17/SLC1A6/TPCN2/KCNQ1/CNNM2/SLC1A3/TRPM3/SLC39A13/TMEM37/SLC5A10/TMC1/CACNA1B/SLC13A5/ATP7B/TRPV2/SLC12A1/SLC12A7/SLC23A1/SLC41A1 |
| Molecular Function | GO:0015298 | solute:cation antiporter activity                                                                        | 4/2321  | 32/18352  | 0.5895874 | 0.76915   | 0.7262871 | 4  | SLC11A1/SLC24A4/SLC8A1/SLC41A1                                                                                                                                                                                                                                                                                                                                                   |
| Molecular Function | GO:0005496 | steroid binding                                                                                          | 13/2321 | 106/18352 | 0.5913803 | 0.7710266 | 0.7280592 | 13 | OSBPL5/VDR/ANXA6/ABCG1/AKR1D1/OSBPL6/ABCA1/OSBPL10/NPC1/ESRRB/SHBG/GRAMD1A/HSD11B2                                                                                                                                                                                                                                                                                               |

|                    |            |                                                          |         |           |           |           |           |    |                                                                                                                                                                                                                                                                                                    |
|--------------------|------------|----------------------------------------------------------|---------|-----------|-----------|-----------|-----------|----|----------------------------------------------------------------------------------------------------------------------------------------------------------------------------------------------------------------------------------------------------------------------------------------------------|
| Molecular Function | GO:0043022 | ribosome binding                                         | 7/2321  | 57/18352  | 0.5930881 | 0.7727902 | 0.7297245 | 7  | SLFN14/IGHMBP2/CPEB3/LETM2/ZNF598/NAA16/SHFL                                                                                                                                                                                                                                                       |
| Molecular Function | GO:0003727 | single-stranded RNA binding                              | 11/2321 | 90/18352  | 0.5961179 | 0.77466   | 0.73149   | 11 | PABPC4/AGO1/ATXN1/AGO2/ZFR/DAZAP1/RBPMS/DIS3L2/ILF3/ZFR2/SYSCRIP                                                                                                                                                                                                                                   |
| Molecular Function | GO:0019001 | guanyl nucleotide binding                                | 49/2321 | 397/18352 | 0.5962988 | 0.77466   | 0.73149   | 49 | EHD1/RHOH/RAB2A/RAP1B/RAB5C/RHOG/RAB5B/DNM2/RAB31/RHEB/ANXA6/GNAZ/AGAP1/RHOF/TUBB4B/RAB27A/GNAI2/GNAT2/MTG2/RHOBTB2/RERG/RAB40C/SLC19A1/GIMAP5/RAB43/LRRK1/GNA11/CNGA4/PDE6H/TUBA4B/TUBA4A/TUBA8/DNM1/RALA/DNM3/GNAO1/DNM1L/GNA12/RAB30/PCK2/MIEF1/RABL2A/ARF5/ATL1/GPN1/MX1/GIMAP8/SEPTIN9/STING1 |
| Molecular Function | GO:0032561 | guanyl ribonucleotide binding                            | 49/2321 | 397/18352 | 0.5962988 | 0.77466   | 0.73149   | 49 | EHD1/RHOH/RAB2A/RAP1B/RAB5C/RHOG/RAB5B/DNM2/RAB31/RHEB/ANXA6/GNAZ/AGAP1/RHOF/TUBB4B/RAB27A/GNAI2/GNAT2/MTG2/RHOBTB2/RERG/RAB40C/SLC19A1/GIMAP5/RAB43/LRRK1/GNA11/CNGA4/PDE6H/TUBA4B/TUBA4A/TUBA8/DNM1/RALA/DNM3/GNAO1/DNM1L/GNA12/RAB30/PCK2/MIEF1/RABL2A/ARF5/ATL1/GPN1/MX1/GIMAP8/SEPTIN9/STING1 |
| Molecular Function | GO:0001882 | nucleoside binding                                       | 48/2321 | 389/18352 | 0.5965364 | 0.77466   | 0.73149   | 48 | EHD1/CDA/RHOH/RAB2A/RAP1B/RAB5C/RHOG/RAB5B/DNM2/RAB31/RHEB/ANXA6/GNAZ/AGAP1/RHOF/TUBB4B/RAB27A/GNAI2/ACTN4/GNAT2/MTG2/RHOBTB2/RERG/RAB40C/GIMAP5/RAB43/LRRK1/GNA11/TUBA4B/TUBA4A/PNP/TUBA8/DNM1/RALA/DNM3/GNAO1/DNM1L/GNA12/RAB30/PCK2/MIEF1/RABL2A/ARF5/ATL1/GPN1/MX1/GIMAP8/SEPTIN9              |
| Molecular Function | GO:0045182 | translation regulator activity                           | 17/2321 | 139/18352 | 0.5974959 | 0.77466   | 0.73149   | 17 | EIF2B5/LARP1/SAMD4A/CTIF/AGO2/MIF4GD/RARA/EIF3M/COP55/CPEB3/IGF2BP3/CELF1/PAIP1/EIF3H/CYFIP1/EIF4G1/EEF1D                                                                                                                                                                                          |
| Molecular Function | GO:0015101 | organic cation<br>transmembrane transporter<br>activity  | 3/2321  | 24/18352  | 0.6003706 | 0.77466   | 0.73149   | 3  | SLC44A4/SLC22A5/SLC7A8                                                                                                                                                                                                                                                                             |
| Molecular Function | GO:0030898 | actin-dependent ATPase<br>activity                       | 3/2321  | 24/18352  | 0.6003706 | 0.77466   | 0.73149   | 3  | MYH9/MYO5A/MYO1C                                                                                                                                                                                                                                                                                   |
| Molecular Function | GO:0004843 | thiol-dependent ubiquitin-<br>specific protease activity | 14/2321 | 115/18352 | 0.6031182 | 0.77466   | 0.73149   | 14 | TNFAIP3/USP3/USP36/OTUB2/COP55/VCPIP1/OTUB1/USP49/USP54/USP2/CYLD/UCHL3/USP35/MINDY1                                                                                                                                                                                                               |

|                    |            |                                                            |         |           |           |         |         |    |                                                                                                                                                                                        |
|--------------------|------------|------------------------------------------------------------|---------|-----------|-----------|---------|---------|----|----------------------------------------------------------------------------------------------------------------------------------------------------------------------------------------|
| Molecular Function | GO:0101005 | ubiquitinyl hydrolase activity                             | 14/2321 | 115/18352 | 0.6031182 | 0.77466 | 0.73149 | 14 | TNFAIP3/USP3/USP36/OTUB2/COP55/VCPIP1/OTUB1/USP49/USP54/USP2/CYLD/UCHL3/USP35/MINDY1                                                                                                   |
| Molecular Function | GO:0008536 | Ran GTPase binding                                         | 5/2321  | 41/18352  | 0.6052305 | 0.77466 | 0.73149 | 5  | TNPO1/RCC1/IPO13/XPO7/XPO6                                                                                                                                                             |
| Molecular Function | GO:0016741 | transferase activity,<br>transferring one-carbon<br>groups | 28/2321 | 229/18352 | 0.6063844 | 0.77466 | 0.73149 | 28 | METTL21A/PRMT2/ASH2L/SETD2/SMYD3/COMT/EHMT2/WDR82/METTL6/KMT2D/TPMT/SETD1B/PRDM2/SETD1A/METTL22/PRDM16/DNMT1/SMYD4/NTMT1/FBL/HNMT/MECOM/<br>METTL8/EEF1AKMT3/EEF1AKMT2/NSD3/NSD2/CSKMT |
| Molecular Function | GO:0008528 | G protein-coupled peptide<br>receptor activity             | 18/2321 | 148/18352 | 0.608004  | 0.77466 | 0.73149 | 18 | SORCS2/CCR2/FPR2/FPR1/ACKR2/CRCP/LTB4R2/CCR9/GIPR/CXCR1/AGTRAP/F2R/AGTR1/VIPR2/NPFFR1/LTB4R/PRLHR/CX3CR1                                                                               |
| Molecular Function | GO:0008237 | metallopeptidase activity                                  | 23/2321 | 189/18352 | 0.6117606 | 0.77466 | 0.73149 | 23 | LNPEP/SPG7/MIPEP/CPD/CNDP2/COP55/ADAMTS13/CPQ/PRPF8/ADAMTSL5/AGBL5/DPP3/XPNPEP1/VASH1/AEBP1/RNPEPL1/CPB2/DPEP2/EIF3H/ADAMDEC1/AMZ1/AGBL2/AOPEP                                         |
| Molecular Function | GO:0000182 | rDNA binding                                               | 1/2321  | 7/18352   | 0.6119671 | 0.77466 | 0.73149 | 1  | RPTOR                                                                                                                                                                                  |
| Molecular Function | GO:0001517 | N-acetylglucosamine 6-O-<br>sulfotransferase activity      | 1/2321  | 7/18352   | 0.6119671 | 0.77466 | 0.73149 | 1  | CHST2                                                                                                                                                                                  |
| Molecular Function | GO:0003916 | DNA topoisomerase activity                                 | 1/2321  | 7/18352   | 0.6119671 | 0.77466 | 0.73149 | 1  | TOP1MT                                                                                                                                                                                 |
| Molecular Function | GO:0003988 | acetyl-CoA C-acyltransferase<br>activity                   | 1/2321  | 7/18352   | 0.6119671 | 0.77466 | 0.73149 | 1  | ACAT1                                                                                                                                                                                  |

|                    |            |                                                             |        |         |           |         |         |   |          |
|--------------------|------------|-------------------------------------------------------------|--------|---------|-----------|---------|---------|---|----------|
| Molecular Function | GO:0004062 | aryl sulfotransferase activity                              | 1/2321 | 7/18352 | 0.6119671 | 0.77466 | 0.73149 | 1 | SULT1A2  |
| Molecular Function | GO:0005004 | GPI-linked ephrin receptor activity                         | 1/2321 | 7/18352 | 0.6119671 | 0.77466 | 0.73149 | 1 | NTRK1    |
| Molecular Function | GO:0005138 | interleukin-6 receptor binding                              | 1/2321 | 7/18352 | 0.6119671 | 0.77466 | 0.73149 | 1 | IL6R     |
| Molecular Function | GO:0005412 | glucose:sodium symporter activity                           | 1/2321 | 7/18352 | 0.6119671 | 0.77466 | 0.73149 | 1 | SLC5A10  |
| Molecular Function | GO:0005499 | vitamin D binding                                           | 1/2321 | 7/18352 | 0.6119671 | 0.77466 | 0.73149 | 1 | VDR      |
| Molecular Function | GO:0008142 | oxysterol binding                                           | 1/2321 | 7/18352 | 0.6119671 | 0.77466 | 0.73149 | 1 | OSBPL5   |
| Molecular Function | GO:0008172 | S-methyltransferase activity                                | 1/2321 | 7/18352 | 0.6119671 | 0.77466 | 0.73149 | 1 | TPMT     |
| Molecular Function | GO:0008312 | 7S RNA binding                                              | 1/2321 | 7/18352 | 0.6119671 | 0.77466 | 0.73149 | 1 | EXOSC2   |
| Molecular Function | GO:0008467 | [heparan sulfate]-glucosamine 3-sulfotransferase 1 activity | 1/2321 | 7/18352 | 0.6119671 | 0.77466 | 0.73149 | 1 | HS3ST3B1 |

|                    |            |                                                   |        |         |           |         |         |   |         |
|--------------------|------------|---------------------------------------------------|--------|---------|-----------|---------|---------|---|---------|
| Molecular Function | GO:0008469 | histone-arginine N-methyltransferase activity     | 1/2321 | 7/18352 | 0.6119671 | 0.77466 | 0.73149 | 1 | PRMT2   |
| Molecular Function | GO:0010853 | cyclase activator activity                        | 1/2321 | 7/18352 | 0.6119671 | 0.77466 | 0.73149 | 1 | RCVRN   |
| Molecular Function | GO:0015114 | phosphate ion transmembrane transporter activity  | 1/2321 | 7/18352 | 0.6119671 | 0.77466 | 0.73149 | 1 | SLC37A1 |
| Molecular Function | GO:0015141 | succinate transmembrane transporter activity      | 1/2321 | 7/18352 | 0.6119671 | 0.77466 | 0.73149 | 1 | SLC13A5 |
| Molecular Function | GO:0015193 | L-proline transmembrane transporter activity      | 1/2321 | 7/18352 | 0.6119671 | 0.77466 | 0.73149 | 1 | SLC36A3 |
| Molecular Function | GO:0016015 | morphogen activity                                | 1/2321 | 7/18352 | 0.6119671 | 0.77466 | 0.73149 | 1 | NODAL   |
| Molecular Function | GO:0016907 | G protein-coupled acetylcholine receptor activity | 1/2321 | 7/18352 | 0.6119671 | 0.77466 | 0.73149 | 1 | CHRM2   |
| Molecular Function | GO:0019828 | aspartic-type endopeptidase inhibitor activity    | 1/2321 | 7/18352 | 0.6119671 | 0.77466 | 0.73149 | 1 | BIN1    |
| Molecular Function | GO:0030250 | guanylate cyclase activator activity              | 1/2321 | 7/18352 | 0.6119671 | 0.77466 | 0.73149 | 1 | RCVRN   |

|                    |            |                                                                   |        |         |           |         |         |   |        |
|--------------------|------------|-------------------------------------------------------------------|--------|---------|-----------|---------|---------|---|--------|
| Molecular Function | GO:0030274 | LIM domain binding                                                | 1/2321 | 7/18352 | 0.6119671 | 0.77466 | 0.73149 | 1 | RPH3AL |
| Molecular Function | GO:0030297 | transmembrane receptor protein tyrosine kinase activator activity | 1/2321 | 7/18352 | 0.6119671 | 0.77466 | 0.73149 | 1 | DGKQ   |
| Molecular Function | GO:0030346 | protein phosphatase 2B binding                                    | 1/2321 | 7/18352 | 0.6119671 | 0.77466 | 0.73149 | 1 | AKAP5  |
| Molecular Function | GO:0030550 | acetylcholine receptor inhibitor activity                         | 1/2321 | 7/18352 | 0.6119671 | 0.77466 | 0.73149 | 1 | LY6G6D |
| Molecular Function | GO:0032051 | clathrin light chain binding                                      | 1/2321 | 7/18352 | 0.6119671 | 0.77466 | 0.73149 | 1 | CLTCL1 |
| Molecular Function | GO:0032407 | MutSalpha complex binding                                         | 1/2321 | 7/18352 | 0.6119671 | 0.77466 | 0.73149 | 1 | MUTYH  |
| Molecular Function | GO:0035005 | 1-phosphatidylinositol-4-phosphate 3-kinase activity              | 1/2321 | 7/18352 | 0.6119671 | 0.77466 | 0.73149 | 1 | PIK3CD |
| Molecular Function | GO:0036042 | long-chain fatty acyl-CoA binding                                 | 1/2321 | 7/18352 | 0.6119671 | 0.77466 | 0.73149 | 1 | ACOT7  |
| Molecular Function | GO:0042500 | aspartic endopeptidase activity, intramembrane cleaving           | 1/2321 | 7/18352 | 0.6119671 | 0.77466 | 0.73149 | 1 | HM13   |

|                    |            |                                                                     |         |          |           |           |           |    |                                                          |
|--------------------|------------|---------------------------------------------------------------------|---------|----------|-----------|-----------|-----------|----|----------------------------------------------------------|
| Molecular Function | GO:0047023 | androsterone dehydrogenase activity                                 | 1/2321  | 7/18352  | 0.6119671 | 0.77466   | 0.73149   | 1  | DHRS9                                                    |
| Molecular Function | GO:0061676 | importin-alpha family protein binding                               | 1/2321  | 7/18352  | 0.6119671 | 0.77466   | 0.73149   | 1  | RB1                                                      |
| Molecular Function | GO:0070569 | uridylyltransferase activity                                        | 1/2321  | 7/18352  | 0.6119671 | 0.77466   | 0.73149   | 1  | TUT1                                                     |
| Molecular Function | GO:0070990 | snRNP binding                                                       | 1/2321  | 7/18352  | 0.6119671 | 0.77466   | 0.73149   | 1  | SNRPD3                                                   |
| Molecular Function | GO:1990405 | protein antigen binding                                             | 1/2321  | 7/18352  | 0.6119671 | 0.77466   | 0.73149   | 1  | PPP2R1A                                                  |
| Molecular Function | GO:0015215 | nucleotide transmembrane transporter activity                       | 4/2321  | 33/18352 | 0.6147561 | 0.7771614 | 0.7338521 | 4  | SLC25A25/SLC33A1/ABCC11/SLC25A1                          |
| Molecular Function | GO:0004527 | exonuclease activity                                                | 10/2321 | 83/18352 | 0.6149842 | 0.7771614 | 0.7338521 | 10 | POLE/EXOSC2/CPSF3/TDP1/MEIOB/ERI3/DIS3L2/PLD3/TOE1/ISG20 |
| Molecular Function | GO:0008374 | O-acyltransferase activity                                          | 6/2321  | 50/18352 | 0.6187029 | 0.7771614 | 0.7338521 | 6  | PLA2G15/LPCAT1/CASD1/ABHD5/CPT1A/AGPAT5                  |
| Molecular Function | GO:0016538 | cyclin-dependent protein serine/threonine kinase regulator activity | 6/2321  | 50/18352 | 0.6187029 | 0.7771614 | 0.7338521 | 6  | CCNH/CCNA1/HEXIM1/CCNY/CCNYL1/CCNP                       |



|                    |            |                                                                                   |        |          |           |           |           |   |                  |
|--------------------|------------|-----------------------------------------------------------------------------------|--------|----------|-----------|-----------|-----------|---|------------------|
| Molecular Function | GO:0008035 | high-density lipoprotein particle binding                                         | 2/2321 | 16/18352 | 0.6189433 | 0.7771614 | 0.7338521 | 2 | PLTP/ABCA1       |
| Molecular Function | GO:0008191 | metalloendopeptidase inhibitor activity                                           | 2/2321 | 16/18352 | 0.6189433 | 0.7771614 | 0.7338521 | 2 | TIMP2/SPOCK2     |
| Molecular Function | GO:0008574 | ATP-dependent microtubule motor activity, plus-end-directed                       | 2/2321 | 16/18352 | 0.6189433 | 0.7771614 | 0.7338521 | 2 | KIF5C/KIF1B      |
| Molecular Function | GO:0015347 | sodium-independent organic anion transmembrane transporter activity               | 2/2321 | 16/18352 | 0.6189433 | 0.7771614 | 0.7338521 | 2 | SLC22A11/SLCO3A1 |
| Molecular Function | GO:0016641 | oxidoreductase activity, acting on the CH-NH2 group of donors, oxygen as acceptor | 2/2321 | 16/18352 | 0.6189433 | 0.7771614 | 0.7338521 | 2 | LOXL3/LOXL4      |
| Molecular Function | GO:0023026 | MHC class II protein complex binding                                              | 2/2321 | 16/18352 | 0.6189433 | 0.7771614 | 0.7338521 | 2 | HLA-DMB/PKM      |
| Molecular Function | GO:0043395 | heparan sulfate proteoglycan binding                                              | 2/2321 | 16/18352 | 0.6189433 | 0.7771614 | 0.7338521 | 2 | AZU1/PTPRC       |
| Molecular Function | GO:0070402 | NADPH binding                                                                     | 2/2321 | 16/18352 | 0.6189433 | 0.7771614 | 0.7338521 | 2 | DUS2/TP53I3      |
| Molecular Function | GO:0071837 | HMG box domain binding                                                            | 2/2321 | 16/18352 | 0.6189433 | 0.7771614 | 0.7338521 | 2 | TCF12/MEF2C      |

|                    |            |                                                                              |         |           |           |           |           |    |                                                                                                                                                         |
|--------------------|------------|------------------------------------------------------------------------------|---------|-----------|-----------|-----------|-----------|----|---------------------------------------------------------------------------------------------------------------------------------------------------------|
| Molecular Function | GO:1904047 | S-adenosyl-L-methionine binding                                              | 2/2321  | 16/18352  | 0.6189433 | 0.7771614 | 0.7338521 | 2  | CBS/TPMT                                                                                                                                                |
| Molecular Function | GO:0061631 | ubiquitin conjugating enzyme activity                                        | 5/2321  | 42/18352  | 0.6272679 | 0.786706  | 0.7428648 | 5  | UBE2O/UBE2J2/UBE2V1/UBE2Q2/UBE2D2                                                                                                                       |
| Molecular Function | GO:1901682 | sulfur compound transmembrane transporter activity                           | 5/2321  | 42/18352  | 0.6272679 | 0.786706  | 0.7428648 | 5  | ABCC1/SLC44A4/SLC13A4/SLC26A1/SLC33A1                                                                                                                   |
| Molecular Function | GO:0001671 | ATPase activator activity                                                    | 3/2321  | 25/18352  | 0.6288981 | 0.7869363 | 0.7430823 | 3  | HSCB/DNAJB6/AHSA2P                                                                                                                                      |
| Molecular Function | GO:0004190 | aspartic-type endopeptidase activity                                         | 3/2321  | 25/18352  | 0.6288981 | 0.7869363 | 0.7430823 | 3  | ASPRV1/CTSD/HM13                                                                                                                                        |
| Molecular Function | GO:0023023 | MHC protein complex binding                                                  | 3/2321  | 25/18352  | 0.6288981 | 0.7869363 | 0.7430823 | 3  | HLA-DMB/PKM/CYRIB                                                                                                                                       |
| Molecular Function | GO:0043027 | cysteine-type endopeptidase inhibitor activity involved in apoptotic process | 3/2321  | 25/18352  | 0.6288981 | 0.7869363 | 0.7430823 | 3  | RPS6KA1/ARRB1/NOL3                                                                                                                                      |
| Molecular Function | GO:0008028 | monocarboxylic acid transmembrane transporter activity                       | 7/2321  | 59/18352  | 0.6306639 | 0.7886923 | 0.7447404 | 7  | SLC51A/SLC16A3/SLC10A1/MFSD2A/SLC16A5/ABCC3/SLC16A1                                                                                                     |
| Molecular Function | GO:0043177 | organic acid binding                                                         | 27/2321 | 224/18352 | 0.6362441 | 0.7952138 | 0.7508984 | 27 | S100A8/DPYS/RXRA/PPARG/VDR/FOLR3/ACOXL/DDC/MTHFS/TNFAIP6/PC/STAB2/SLC19A1/HBB/FCN1/RARA/AGXT/ACACB/ACOX2/LYVE1/SLC1A3/HMGCL/P4HA2/HMGCS1/CD33/P3H3/P3H1 |

|                    |            |                                            |         |           |           |           |           |    |                                                                                                                       |
|--------------------|------------|--------------------------------------------|---------|-----------|-----------|-----------|-----------|----|-----------------------------------------------------------------------------------------------------------------------|
| Molecular Function | GO:0003743 | translation initiation factor activity     | 6/2321  | 51/18352  | 0.638475  | 0.7962964 | 0.7519207 | 6  | EIF2B5/AGO2/EIF3M/COPSS/EIF3H/EIF4G1                                                                                  |
| Molecular Function | GO:0042887 | amide transmembrane transporter activity   | 6/2321  | 51/18352  | 0.638475  | 0.7962964 | 0.7519207 | 6  | ABCC1/SLC19A1/ABCA1/AQP3/SLC33A1/AQP9                                                                                 |
| Molecular Function | GO:0000217 | DNA secondary structure binding            | 4/2321  | 34/18352  | 0.63894   | 0.7962964 | 0.7519207 | 4  | BLM/NEIL3/CLSPN/MEF2C                                                                                                 |
| Molecular Function | GO:0005154 | epidermal growth factor receptor binding   | 4/2321  | 34/18352  | 0.63894   | 0.7962964 | 0.7519207 | 4  | TGFA/FER/VAV2/VAV3                                                                                                    |
| Molecular Function | GO:0016229 | steroid dehydrogenase activity             | 4/2321  | 34/18352  | 0.63894   | 0.7962964 | 0.7519207 | 4  | DHRS9/AKR1D1/HSD17B2/HSD11B2                                                                                          |
| Molecular Function | GO:0051082 | unfolded protein binding                   | 14/2321 | 118/18352 | 0.6427692 | 0.8004832 | 0.7558743 | 14 | CALR/ERN1/SPG7/DNAJB13/AIP/TUBB4B/CLU/CLGN/DNAJB6/NACAD/CHAF1A/CCT6A/PFDN2/PFDN6                                      |
| Molecular Function | GO:0003777 | microtubule motor activity                 | 9/2321  | 77/18352  | 0.6514338 | 0.8004832 | 0.7558743 | 9  | KIF13B/DNAH3/KIF13A/DYNC1H1/KIF21B/KIF5C/KIF1B/DNAI2/KIFC3                                                            |
| Molecular Function | GO:0004386 | helicase activity                          | 19/2321 | 160/18352 | 0.6516437 | 0.8004832 | 0.7558743 | 19 | BLM/SRCAP/MOV10L1/RTEL1/MCM5/WRNIP1/RECQL5/IGHMBP2/DDX27/SMARCA2/MCM2/SMARCA1/DHX16/CHD9/DDX41/CHD8/RUVBL1/ERCC2/FBH1 |
| Molecular Function | GO:0005324 | long-chain fatty acid transporter activity | 2/2321  | 17/18352  | 0.6526293 | 0.8004832 | 0.7558743 | 2  | MFSD2A/SLC2A1                                                                                                         |

|                    |            |                                                                |         |           |           |           |           |    |                                                                                                          |
|--------------------|------------|----------------------------------------------------------------|---------|-----------|-----------|-----------|-----------|----|----------------------------------------------------------------------------------------------------------|
| Molecular Function | GO:0008308 | voltage-gated anion channel activity                           | 2/2321  | 17/18352  | 0.6526293 | 0.8004832 | 0.7558743 | 2  | CLCN6/ANO6                                                                                               |
| Molecular Function | GO:0008553 | proton-exporting ATPase activity, phosphorylative mechanism    | 2/2321  | 17/18352  | 0.6526293 | 0.8004832 | 0.7558743 | 2  | ATP2A3/ATP6V1C1                                                                                          |
| Molecular Function | GO:0015116 | sulfate transmembrane transporter activity                     | 2/2321  | 17/18352  | 0.6526293 | 0.8004832 | 0.7558743 | 2  | SLC13A4/SLC26A1                                                                                          |
| Molecular Function | GO:0015377 | cation:chloride symporter activity                             | 2/2321  | 17/18352  | 0.6526293 | 0.8004832 | 0.7558743 | 2  | SLC12A1/SLC12A7                                                                                          |
| Molecular Function | GO:0016888 | endodeoxyribonuclease activity, producing 5'-phosphomonoesters | 2/2321  | 17/18352  | 0.6526293 | 0.8004832 | 0.7558743 | 2  | DNASE1L3/SLX4                                                                                            |
| Molecular Function | GO:0034185 | apolipoprotein binding                                         | 2/2321  | 17/18352  | 0.6526293 | 0.8004832 | 0.7558743 | 2  | LIPC/ABCA1                                                                                               |
| Molecular Function | GO:0043024 | ribosomal small subunit binding                                | 2/2321  | 17/18352  | 0.6526293 | 0.8004832 | 0.7558743 | 2  | LARP1/UNG                                                                                                |
| Molecular Function | GO:1990380 | Lys48-specific deubiquitinase activity                         | 2/2321  | 17/18352  | 0.6526293 | 0.8004832 | 0.7558743 | 2  | CYLD/MINDY1                                                                                              |
| Molecular Function | GO:0001653 | peptide receptor activity                                      | 18/2321 | 152/18352 | 0.6543402 | 0.8004832 | 0.7558743 | 18 | SORCS2/CCR2/FPR2/FPR1/ACKR2/CRCP/LTB4R2/CCR9/GIPR/CXCR1/AGTRAP/F2R/AGTR1/VIPR2/NPFFR1/LTB4R/PRLHR/CX3CR1 |

|                    |            |                                               |         |           |           |           |           |    |                                                                                                                                  |
|--------------------|------------|-----------------------------------------------|---------|-----------|-----------|-----------|-----------|----|----------------------------------------------------------------------------------------------------------------------------------|
| Molecular Function | GO:0015081 | sodium ion transmembrane transporter activity | 18/2321 | 152/18352 | 0.6543402 | 0.8004832 | 0.7558743 | 18 | TRPM2/SLC10A1/MFSD2A/FXYD2/SLC24A4/SLC8A1/GRIK4/SCN1A/SLC13A4/ASIC4/SLC1A2/SLC1A6/SLC1A3/SLC5A10/SLC13A5/SLC12A1/SLC23A1/SLC41A1 |
| Molecular Function | GO:0001965 | G-protein alpha-subunit binding               | 3/2321  | 26/18352  | 0.6559843 | 0.8004832 | 0.7558743 | 3  | CCDC88C/F2R/RGS10                                                                                                                |
| Molecular Function | GO:0008198 | ferrous iron binding                          | 3/2321  | 26/18352  | 0.6559843 | 0.8004832 | 0.7558743 | 3  | FECH/FTO/TET2                                                                                                                    |
| Molecular Function | GO:0016866 | intramolecular transferase activity           | 3/2321  | 26/18352  | 0.6559843 | 0.8004832 | 0.7558743 | 3  | PGAM1/PMM2/PUS7                                                                                                                  |
| Molecular Function | GO:0017025 | TBP-class protein binding                     | 3/2321  | 26/18352  | 0.6559843 | 0.8004832 | 0.7558743 | 3  | BRF1/HHEX/RUVBL1                                                                                                                 |
| Molecular Function | GO:0070001 | aspartic-type peptidase activity              | 3/2321  | 26/18352  | 0.6559843 | 0.8004832 | 0.7558743 | 3  | ASPRV1/CTSD/HM13                                                                                                                 |
| Molecular Function | GO:0035064 | methylated histone binding                    | 8/2321  | 69/18352  | 0.6581302 | 0.8004832 | 0.7558743 | 8  | ZMYND8/UHRF1/CDYL/PHF19/KDM7A/TP53BP1/CHD8/ING5                                                                                  |
| Molecular Function | GO:0140034 | methylation-dependent protein binding         | 8/2321  | 69/18352  | 0.6581302 | 0.8004832 | 0.7558743 | 8  | ZMYND8/UHRF1/CDYL/PHF19/KDM7A/TP53BP1/CHD8/ING5                                                                                  |
| Molecular Function | GO:0009055 | electron transfer activity                    | 13/2321 | 111/18352 | 0.6595623 | 0.8004832 | 0.7558743 | 13 | ALDH2/NDUFS2/ALDH4A1/NCF2/FDX1/POR/AIFM2/GLRX2/NDUFA4L2/P4HA2/ASPH/SDHD/AOX1                                                     |

|                    |            |                                                         |         |          |           |           |           |    |                                                     |
|--------------------|------------|---------------------------------------------------------|---------|----------|-----------|-----------|-----------|----|-----------------------------------------------------|
| Molecular Function | GO:0016209 | antioxidant activity                                    | 10/2321 | 86/18352 | 0.6606504 | 0.8004832 | 0.7558743 | 10 | MPO/LPO/HBB/MGST2/CAT/NXN/GSTO1/TXNRD2/GSTO2/PRXL2B |
| Molecular Function | GO:0001758 | retinal dehydrogenase activity                          | 1/2321  | 8/18352  | 0.6610608 | 0.8004832 | 0.7558743 | 1  | ALDH1A2                                             |
| Molecular Function | GO:0001849 | complement component C1q complex binding                | 1/2321  | 8/18352  | 0.6610608 | 0.8004832 | 0.7558743 | 1  | CALR                                                |
| Molecular Function | GO:0003680 | minor groove of adenine-thymine-rich DNA binding        | 1/2321  | 8/18352  | 0.6610608 | 0.8004832 | 0.7558743 | 1  | MEF2C                                               |
| Molecular Function | GO:0003847 | 1-alkyl-2-acetylglycerophosphocholine esterase activity | 1/2321  | 8/18352  | 0.6610608 | 0.8004832 | 0.7558743 | 1  | ASPG                                                |
| Molecular Function | GO:0004415 | hyaluronoglucosaminidase activity                       | 1/2321  | 8/18352  | 0.6610608 | 0.8004832 | 0.7558743 | 1  | CEMIP2                                              |
| Molecular Function | GO:0004706 | JUN kinase kinase kinase activity                       | 1/2321  | 8/18352  | 0.6610608 | 0.8004832 | 0.7558743 | 1  | RIPK1                                               |
| Molecular Function | GO:0004897 | ciliary neurotrophic factor receptor activity           | 1/2321  | 8/18352  | 0.6610608 | 0.8004832 | 0.7558743 | 1  | IL6R                                                |
| Molecular Function | GO:0008239 | dipeptidyl-peptidase activity                           | 1/2321  | 8/18352  | 0.6610608 | 0.8004832 | 0.7558743 | 1  | DPP3                                                |

|                    |            |                                                |        |         |           |           |           |   |        |
|--------------------|------------|------------------------------------------------|--------|---------|-----------|-----------|-----------|---|--------|
| Molecular Function | GO:0008430 | selenium binding                               | 1/2321 | 8/18352 | 0.6610608 | 0.8004832 | 0.7558743 | 1 | RPH3A  |
| Molecular Function | GO:0015186 | L-glutamine transmembrane transporter activity | 1/2321 | 8/18352 | 0.6610608 | 0.8004832 | 0.7558743 | 1 | SLC1A5 |
| Molecular Function | GO:0015245 | fatty acid transmembrane transporter activity  | 1/2321 | 8/18352 | 0.6610608 | 0.8004832 | 0.7558743 | 1 | MFSD2A |
| Molecular Function | GO:0016494 | C-X-C chemokine receptor activity              | 1/2321 | 8/18352 | 0.6610608 | 0.8004832 | 0.7558743 | 1 | CXCR1  |
| Molecular Function | GO:0017151 | DEAD/H-box RNA helicase binding                | 1/2321 | 8/18352 | 0.6610608 | 0.8004832 | 0.7558743 | 1 | SMAD3  |
| Molecular Function | GO:0019871 | sodium channel inhibitor activity              | 1/2321 | 8/18352 | 0.6610608 | 0.8004832 | 0.7558743 | 1 | NEDD4  |
| Molecular Function | GO:0023029 | MHC class Ib protein binding                   | 1/2321 | 8/18352 | 0.6610608 | 0.8004832 | 0.7558743 | 1 | CYRIB  |
| Molecular Function | GO:0030249 | guanylate cyclase regulator activity           | 1/2321 | 8/18352 | 0.6610608 | 0.8004832 | 0.7558743 | 1 | RCVRN  |
| Molecular Function | GO:0030306 | ADP-ribosylation factor binding                | 1/2321 | 8/18352 | 0.6610608 | 0.8004832 | 0.7558743 | 1 | SORL1  |

|                    |            |                                                                       |        |         |           |           |           |   |         |
|--------------------|------------|-----------------------------------------------------------------------|--------|---------|-----------|-----------|-----------|---|---------|
| Molecular Function | GO:0030881 | beta-2-microglobulin binding                                          | 1/2321 | 8/18352 | 0.6610608 | 0.8004832 | 0.7558743 | 1 | HLA-F   |
| Molecular Function | GO:0031402 | sodium ion binding                                                    | 1/2321 | 8/18352 | 0.6610608 | 0.8004832 | 0.7558743 | 1 | PDXK    |
| Molecular Function | GO:0032453 | histone demethylase activity<br>(H3-K4 specific)                      | 1/2321 | 8/18352 | 0.6610608 | 0.8004832 | 0.7558743 | 1 | KDM1B   |
| Molecular Function | GO:0035312 | 5'-3' exodeoxyribonuclease<br>activity                                | 1/2321 | 8/18352 | 0.6610608 | 0.8004832 | 0.7558743 | 1 | PLD3    |
| Molecular Function | GO:0036374 | glutathione hydrolase<br>activity                                     | 1/2321 | 8/18352 | 0.6610608 | 0.8004832 | 0.7558743 | 1 | GGT1    |
| Molecular Function | GO:0036435 | K48-linked polyubiquitin<br>modification-dependent<br>protein binding | 1/2321 | 8/18352 | 0.6610608 | 0.8004832 | 0.7558743 | 1 | MINDY1  |
| Molecular Function | GO:0047499 | calcium-independent<br>phospholipase A2 activity                      | 1/2321 | 8/18352 | 0.6610608 | 0.8004832 | 0.7558743 | 1 | PLA2G15 |
| Molecular Function | GO:0050072 | m7G(5')pppN diphosphatase<br>activity                                 | 1/2321 | 8/18352 | 0.6610608 | 0.8004832 | 0.7558743 | 1 | NUDT3   |
| Molecular Function | GO:0061665 | SUMO ligase activity                                                  | 1/2321 | 8/18352 | 0.6610608 | 0.8004832 | 0.7558743 | 1 | NSMCE2  |



|                    |            |                                                                                                 |         |           |           |           |           |    |                                                                                           |
|--------------------|------------|-------------------------------------------------------------------------------------------------|---------|-----------|-----------|-----------|-----------|----|-------------------------------------------------------------------------------------------|
| Molecular Function | GO:0097322 | 7SK snRNA binding                                                                               | 1/2321  | 8/18352   | 0.6610608 | 0.8004832 | 0.7558743 | 1  | HEXIM1                                                                                    |
| Molecular Function | GO:0097371 | MDM2/MDM4 family protein binding                                                                | 1/2321  | 8/18352   | 0.6610608 | 0.8004832 | 0.7558743 | 1  | MARCHF7                                                                                   |
| Molecular Function | GO:0016620 | oxidoreductase activity, acting on the aldehyde or oxo group of donors, NAD or NADP as acceptor | 4/2321  | 35/18352  | 0.6621093 | 0.8008615 | 0.7562315 | 4  | FAR2/ALDH2/ALDH4A1/ALDH1A2                                                                |
| Molecular Function | GO:0016814 | hydrolase activity, acting on carbon-nitrogen (but not peptide) bonds, in cyclic amidines       | 4/2321  | 35/18352  | 0.6621093 | 0.8008615 | 0.7562315 | 4  | CDA/AMPD3/MTHFD1/DCTD                                                                     |
| Molecular Function | GO:0008242 | omega peptidase activity                                                                        | 15/2321 | 128/18352 | 0.6640806 | 0.8027997 | 0.7580617 | 15 | GGT1/TNFAIP3/USP3/USP36/OTUB2/COPS5/VCPIP1/OTUB1/USP49/USP54/USP2/CYLD/UCHL3/USP35/MINDY1 |
| Molecular Function | GO:1901505 | carbohydrate derivative transmembrane transporter activity                                      | 7/2321  | 61/18352  | 0.6661955 | 0.8049092 | 0.7600536 | 7  | SLC25A25/MFSD2A/SLC29A3/SLC37A1/SLC33A1/SLC29A1/SLC25A1                                   |
| Molecular Function | GO:0005245 | voltage-gated calcium channel activity                                                          | 5/2321  | 44/18352  | 0.6690349 | 0.8065485 | 0.7616015 | 5  | CACNA1C/CACNA2D4/TPCN2/TMC1/CACNA1B                                                       |
| Molecular Function | GO:0034062 | 5'-3' RNA polymerase activity                                                                   | 5/2321  | 44/18352  | 0.6690349 | 0.8065485 | 0.7616015 | 5  | POLR2F/CRCP/RMRP/RPAP1/POLR1D                                                             |
| Molecular Function | GO:0061650 | ubiquitin-like protein conjugating enzyme activity                                              | 5/2321  | 44/18352  | 0.6690349 | 0.8065485 | 0.7616015 | 5  | UBE2O/UBE2J2/UBE2V1/UBE2Q2/UBE2D2                                                         |

|                    |            |                                                      |         |           |           |           |           |    |                                                                                                                                             |
|--------------------|------------|------------------------------------------------------|---------|-----------|-----------|-----------|-----------|----|---------------------------------------------------------------------------------------------------------------------------------------------|
| Molecular Function | GO:0097747 | RNA polymerase activity                              | 5/2321  | 44/18352  | 0.6690349 | 0.8065485 | 0.7616015 | 5  | POLR2F/CRCP/RMRP/RPAP1/POLR1D                                                                                                               |
| Molecular Function | GO:0015459 | potassium channel regulator activity                 | 6/2321  | 53/18352  | 0.6761287 | 0.814649  | 0.7692506 | 6  | PRKCZ/KCNE1/KCNAB2/SGK1/KCNIP1/SGK2                                                                                                         |
| Molecular Function | GO:0008144 | drug binding                                         | 12/2321 | 104/18352 | 0.6773586 | 0.8153569 | 0.7699191 | 12 | PDE4D/PPARG/NR1I2/LCN2/FKBP5/NFATC1/DCAF15/RARA/PNP/P2RX1/HMGCS1/DHODH                                                                      |
| Molecular Function | GO:0031406 | carboxylic acid binding                              | 25/2321 | 212/18352 | 0.6774657 | 0.8153569 | 0.7699191 | 25 | S100A8/DPYS/RXRA/PPARG/VDR/FOLR3/ACOXL/DDC/MTHFS/TNFAIP6/PC/STAB2/SLC19A1/FCN1/RARA/AGXT/ACACB/ACO2/LYVE1/SLC1A3/HMGCL/P4HA2/CD33/P3H3/P3H1 |
| Molecular Function | GO:0004033 | aldo-keto reductase (NADP) activity                  | 3/2321  | 27/18352  | 0.6816161 | 0.8189866 | 0.7733464 | 3  | KCNAB2/AKR1D1/RDH10                                                                                                                         |
| Molecular Function | GO:0044183 | protein folding chaperone                            | 3/2321  | 27/18352  | 0.6816161 | 0.8189866 | 0.7733464 | 3  | CALR/CLGN/PFDN2                                                                                                                             |
| Molecular Function | GO:0004553 | hydrolase activity, hydrolyzing O-glycosyl compounds | 11/2321 | 96/18352  | 0.6829369 | 0.8189866 | 0.7733464 | 11 | HEXB/GALC/MGAM/LYG2/CHIT1/EDEM1/EDEM2/MAN2C1/MAN1C1/CEMIP2/MYORG                                                                            |
| Molecular Function | GO:0004708 | MAP kinase kinase activity                           | 2/2321  | 18/18352  | 0.6838937 | 0.8189866 | 0.7733464 | 2  | MAP2K6/MAPKAP3                                                                                                                              |
| Molecular Function | GO:0016500 | protein-hormone receptor activity                    | 2/2321  | 18/18352  | 0.6838937 | 0.8189866 | 0.7733464 | 2  | IGF1R/INSRR                                                                                                                                 |

|                    |            |                                                                   |         |           |           |           |           |    |                                                                                             |
|--------------------|------------|-------------------------------------------------------------------|---------|-----------|-----------|-----------|-----------|----|---------------------------------------------------------------------------------------------|
| Molecular Function | GO:0035613 | RNA stem-loop binding                                             | 2/2321  | 18/18352  | 0.6838937 | 0.8189866 | 0.7733464 | 2  | CPEB3/DAZAP1                                                                                |
| Molecular Function | GO:0050811 | GABA receptor binding                                             | 2/2321  | 18/18352  | 0.6838937 | 0.8189866 | 0.7733464 | 2  | AKAP5/PLCL1                                                                                 |
| Molecular Function | GO:0055106 | ubiquitin-protein transferase regulator activity                  | 2/2321  | 18/18352  | 0.6838937 | 0.8189866 | 0.7733464 | 2  | FZR1/TRIB1                                                                                  |
| Molecular Function | GO:0019825 | oxygen binding                                                    | 4/2321  | 36/18352  | 0.6842452 | 0.8189866 | 0.7733464 | 4  | ADGB/CBS/HBB/MB                                                                             |
| Molecular Function | GO:0034061 | DNA polymerase activity                                           | 4/2321  | 36/18352  | 0.6842452 | 0.8189866 | 0.7733464 | 4  | POLE/POLD3/POLE4/POLI                                                                       |
| Molecular Function | GO:0061980 | regulatory RNA binding                                            | 5/2321  | 45/18352  | 0.6887236 | 0.8238937 | 0.7779801 | 5  | PIWIL4/ZC3H7A/AGO1/TLR9/AGO2                                                                |
| Molecular Function | GO:0015932 | nucleobase-containing compound transmembrane transporter activity | 6/2321  | 54/18352  | 0.6939767 | 0.828886  | 0.7826942 | 6  | SLC25A25/SLC29A3/SLC33A1/ABCC11/SLC29A1/SLC25A1                                             |
| Molecular Function | GO:0050661 | NADP binding                                                      | 6/2321  | 54/18352  | 0.6939767 | 0.828886  | 0.7826942 | 6  | POR/HIBADH/CAT/DUS2/CRYM/TP53I3                                                             |
| Molecular Function | GO:0008234 | cysteine-type peptidase activity                                  | 16/2321 | 139/18352 | 0.6948015 | 0.828886  | 0.7826942 | 16 | CTS2/CAPN14/ADGB/CTSH/USP36/OTUB2/COP55/CTSB/CASP7/OTUB1/USP49/CASP1/USP2/UCL3/USP35/MINDY1 |

|                    |            |                                                                 |         |           |           |           |           |    |                                                                                                 |
|--------------------|------------|-----------------------------------------------------------------|---------|-----------|-----------|-----------|-----------|----|-------------------------------------------------------------------------------------------------|
| Molecular Function | GO:0015276 | ligand-gated ion channel activity                               | 16/2321 | 139/18352 | 0.6948015 | 0.828886  | 0.7826942 | 16 | TRPM2/KCNJ15/ITPR2/ANXA6/ITPR1/RASA3/GRIK4/KCNK6/ASIC4/AQP1/HTR3A/CNGA4/TPCN2/P2RX1/P2RX5/GRID1 |
| Molecular Function | GO:0022834 | ligand-gated channel activity                                   | 16/2321 | 139/18352 | 0.6948015 | 0.828886  | 0.7826942 | 16 | TRPM2/KCNJ15/ITPR2/ANXA6/ITPR1/RASA3/GRIK4/KCNK6/ASIC4/AQP1/HTR3A/CNGA4/TPCN2/P2RX1/P2RX5/GRID1 |
| Molecular Function | GO:0003691 | double-stranded telomeric DNA binding                           | 1/2321  | 9/18352   | 0.7039456 | 0.8297863 | 0.7835444 | 1  | HMBOX1                                                                                          |
| Molecular Function | GO:0003796 | lysozyme activity                                               | 1/2321  | 9/18352   | 0.7039456 | 0.8297863 | 0.7835444 | 1  | LYG2                                                                                            |
| Molecular Function | GO:0004022 | alcohol dehydrogenase (NAD+) activity                           | 1/2321  | 9/18352   | 0.7039456 | 0.8297863 | 0.7835444 | 1  | DHRS9                                                                                           |
| Molecular Function | GO:0004169 | dolichyl-phosphate-mannose-protein mannosyltransferase activity | 1/2321  | 9/18352   | 0.7039456 | 0.8297863 | 0.7835444 | 1  | POMT2                                                                                           |
| Molecular Function | GO:0004322 | ferroxidase activity                                            | 1/2321  | 9/18352   | 0.7039456 | 0.8297863 | 0.7835444 | 1  | CYB561D2                                                                                        |
| Molecular Function | GO:0004726 | non-membrane spanning protein tyrosine phosphatase activity     | 1/2321  | 9/18352   | 0.7039456 | 0.8297863 | 0.7835444 | 1  | DUSP22                                                                                          |
| Molecular Function | GO:0005127 | ciliary neurotrophic factor receptor binding                    | 1/2321  | 9/18352   | 0.7039456 | 0.8297863 | 0.7835444 | 1  | CRLF1                                                                                           |

|                    |            |                                                                   |        |         |           |           |           |   |          |
|--------------------|------------|-------------------------------------------------------------------|--------|---------|-----------|-----------|-----------|---|----------|
| Molecular Function | GO:0005131 | growth hormone receptor binding                                   | 1/2321 | 9/18352 | 0.7039456 | 0.8297863 | 0.7835444 | 1 | JAK1     |
| Molecular Function | GO:0005222 | intracellular cAMP-activated cation channel activity              | 1/2321 | 9/18352 | 0.7039456 | 0.8297863 | 0.7835444 | 1 | CNGA4    |
| Molecular Function | GO:0015181 | arginine transmembrane transporter activity                       | 1/2321 | 9/18352 | 0.7039456 | 0.8297863 | 0.7835444 | 1 | SLC7A1   |
| Molecular Function | GO:0016724 | oxidoreductase activity, oxidizing metal ions, oxygen as acceptor | 1/2321 | 9/18352 | 0.7039456 | 0.8297863 | 0.7835444 | 1 | CYB561D2 |
| Molecular Function | GO:0017108 | 5'-flap endonuclease activity                                     | 1/2321 | 9/18352 | 0.7039456 | 0.8297863 | 0.7835444 | 1 | SLX4     |
| Molecular Function | GO:0030023 | extracellular matrix constituent conferring elasticity            | 1/2321 | 9/18352 | 0.7039456 | 0.8297863 | 0.7835444 | 1 | EMILIN2  |
| Molecular Function | GO:0030492 | hemoglobin binding                                                | 1/2321 | 9/18352 | 0.7039456 | 0.8297863 | 0.7835444 | 1 | HBB      |
| Molecular Function | GO:0031957 | very long-chain fatty acid-CoA ligase activity                    | 1/2321 | 9/18352 | 0.7039456 | 0.8297863 | 0.7835444 | 1 | ACSF3    |
| Molecular Function | GO:0032393 | MHC class I receptor activity                                     | 1/2321 | 9/18352 | 0.7039456 | 0.8297863 | 0.7835444 | 1 | CTSH     |

|                    |            |                                                                               |        |          |           |           |           |   |                         |
|--------------------|------------|-------------------------------------------------------------------------------|--------|----------|-----------|-----------|-----------|---|-------------------------|
| Molecular Function | GO:0043184 | vascular endothelial growth factor receptor 2 binding                         | 1/2321 | 9/18352  | 0.7039456 | 0.8297863 | 0.7835444 | 1 | ITGB3                   |
| Molecular Function | GO:0097027 | ubiquitin-protein transferase activator activity                              | 1/2321 | 9/18352  | 0.7039456 | 0.8297863 | 0.7835444 | 1 | FZR1                    |
| Molecular Function | GO:0097200 | cysteine-type endopeptidase activity involved in execution phase of apoptosis | 1/2321 | 9/18352  | 0.7039456 | 0.8297863 | 0.7835444 | 1 | CASP7                   |
| Molecular Function | GO:0097677 | STAT family protein binding                                                   | 1/2321 | 9/18352  | 0.7039456 | 0.8297863 | 0.7835444 | 1 | PARP9                   |
| Molecular Function | GO:0120016 | sphingolipid transfer activity                                                | 1/2321 | 9/18352  | 0.7039456 | 0.8297863 | 0.7835444 | 1 | PLTP                    |
| Molecular Function | GO:0120017 | ceramide transfer activity                                                    | 1/2321 | 9/18352  | 0.7039456 | 0.8297863 | 0.7835444 | 1 | PLTP                    |
| Molecular Function | GO:0015301 | anion:anion antiporter activity                                               | 3/2321 | 28/18352 | 0.7057969 | 0.8300685 | 0.7838108 | 3 | SLC19A1/SLC26A1/SLC37A1 |
| Molecular Function | GO:0035255 | ionotropic glutamate receptor binding                                         | 3/2321 | 28/18352 | 0.7057969 | 0.8300685 | 0.7838108 | 3 | SHANK2/NEDD4/FLOT1      |
| Molecular Function | GO:0043015 | gamma-tubulin binding                                                         | 3/2321 | 28/18352 | 0.7057969 | 0.8300685 | 0.7838108 | 3 | BRCA2/NDRG1/TUBGCP2     |

|                    |            |                                                                 |         |           |           |           |           |    |                                                                                                                                                                                                                                                                         |
|--------------------|------------|-----------------------------------------------------------------|---------|-----------|-----------|-----------|-----------|----|-------------------------------------------------------------------------------------------------------------------------------------------------------------------------------------------------------------------------------------------------------------------------|
| Molecular Function | GO:0140323 | solute:anion antiporter activity                                | 3/2321  | 28/18352  | 0.7057969 | 0.8300685 | 0.7838108 | 3  | SLC19A1/SLC26A1/SLC37A1                                                                                                                                                                                                                                                 |
| Molecular Function | GO:0032550 | purine ribonucleoside binding                                   | 45/2321 | 380/18352 | 0.7060923 | 0.8300685 | 0.7838108 | 45 | EHD1/RHOH/RAB2A/RAP1B/RAB5C/RHOG/RAB5B/DNM2/RAB31/RHEB/ANXA6/GNAZ/AGAP1/RHOF/TUBB4B/RAB27A/GNAI2/GNAT2/MTG2/RHOBTB2/RERG/RAB40C/GIMAP5/RAB43/LRRK1/GNA11/TUBA4B/TUBA4A/TUBA8/DNM1/RALA/DNM3/GNAO1/DNM1L/GNA12/RAB30/PCK2/MIEF1/RABL2A/ARF5/ATL1/GPN1/MX1/GIMAP8/SEPTIN9 |
| Molecular Function | GO:0004970 | ionotropic glutamate receptor activity                          | 2/2321  | 19/18352  | 0.7128101 | 0.8361589 | 0.7895618 | 2  | GRIK4/GRID1                                                                                                                                                                                                                                                             |
| Molecular Function | GO:0005003 | ephrin receptor activity                                        | 2/2321  | 19/18352  | 0.7128101 | 0.8361589 | 0.7895618 | 2  | EPHB3/NTRK1                                                                                                                                                                                                                                                             |
| Molecular Function | GO:0008409 | 5'-3' exonuclease activity                                      | 2/2321  | 19/18352  | 0.7128101 | 0.8361589 | 0.7895618 | 2  | CPSF3/PLD3                                                                                                                                                                                                                                                              |
| Molecular Function | GO:0046933 | proton-transporting ATP synthase activity, rotational mechanism | 2/2321  | 19/18352  | 0.7128101 | 0.8361589 | 0.7895618 | 2  | ATP5PD/ATP6V0C                                                                                                                                                                                                                                                          |
| Molecular Function | GO:0042277 | peptide binding                                                 | 36/2321 | 308/18352 | 0.7201875 | 0.8443577 | 0.7973037 | 36 | RXRA/SORL1/CALR/PPARG/APBB2/LNPEP/MAML1/PIK3R1/TNPO1/FPR2/HLA-C/HLA-F/CLU/IGF1R/APBA2/MARCO/CRHBP/GIPR/SLC7A5/ITM2C/TRGV9/MGST2/CAT/MAPK8IP2/ITGB2/NOD2/CABP1/SLC7A8/VIPR2/CACNA1B/CRIP1/RELA/NPFFR1/INHBA/C2CD2L/BABAM2                                                |
| Molecular Function | GO:0043021 | ribonucleoprotein complex binding                               | 15/2321 | 133/18352 | 0.7213151 | 0.8452243 | 0.7981221 | 15 | SNRPD3/SLFN14/LARP1/IGHMBP2/UNG/CPEB3/SMG6/LETM2/ZNF598/NAA16/PRPF6/SND1/SECISBP2/GEMIN4/SHFL                                                                                                                                                                           |
| Molecular Function | GO:0043539 | protein serine/threonine kinase activator activity              | 4/2321  | 38/18352  | 0.7253893 | 0.8490986 | 0.8017804 | 4  | CAB39/STK3/LTF/DAZAP2                                                                                                                                                                                                                                                   |

|                    |            |                                                   |         |           |           |           |           |    |                                                                                                                                                                                                                                                                         |
|--------------------|------------|---------------------------------------------------|---------|-----------|-----------|-----------|-----------|----|-------------------------------------------------------------------------------------------------------------------------------------------------------------------------------------------------------------------------------------------------------------------------|
| Molecular Function | GO:0001883 | purine nucleoside binding                         | 45/2321 | 383/18352 | 0.725792  | 0.8490986 | 0.8017804 | 45 | EHD1/RHOH/RAB2A/RAP1B/RAB5C/RHOG/RAB5B/DNM2/RAB31/RHEB/ANXA6/GNAZ/AGAP1/RHOF/TUBB4B/RAB27A/GNAI2/GNAT2/MTG2/RHOBTB2/RERG/RAB40C/GIMAP5/RAB43/LRRK1/GNA11/TUBA4B/TUBA4A/TUBA8/DNM1/RALA/DNM3/GNAO1/DNM1L/GNA12/RAB30/PCK2/MIEF1/RABL2A/ARF5/ATL1/GPN1/MX1/GIMAP8/SEPTIN9 |
| Molecular Function | GO:0032549 | ribonucleoside binding                            | 45/2321 | 383/18352 | 0.725792  | 0.8490986 | 0.8017804 | 45 | EHD1/RHOH/RAB2A/RAP1B/RAB5C/RHOG/RAB5B/DNM2/RAB31/RHEB/ANXA6/GNAZ/AGAP1/RHOF/TUBB4B/RAB27A/GNAI2/GNAT2/MTG2/RHOBTB2/RERG/RAB40C/GIMAP5/RAB43/LRRK1/GNA11/TUBA4B/TUBA4A/TUBA8/DNM1/RALA/DNM3/GNAO1/DNM1L/GNA12/RAB30/PCK2/MIEF1/RABL2A/ARF5/ATL1/GPN1/MX1/GIMAP8/SEPTIN9 |
| Molecular Function | GO:0016758 | transferase activity, transferring hexosyl groups | 23/2321 | 201/18352 | 0.7280754 | 0.8491053 | 0.8017868 | 23 | CSGALNACT1/FUT4/GALNT2/FUT7/RPN1/HEXB/MGAT5/GALNT12/CHSY1/MGAT4A/MGAT3/B4GALT7/POMT2/B3GNT5/B4GALT3/GALNT9/PIGQ/FUT11/GCNT2/ALG11/HAS3/B3GNT2/B4GAT1                                                                                                                    |
| Molecular Function | GO:0033612 | receptor serine/threonine kinase binding          | 3/2321  | 29/18352  | 0.7285435 | 0.8491053 | 0.8017868 | 3  | INHBA/NODAL/FADD                                                                                                                                                                                                                                                        |
| Molecular Function | GO:0043236 | laminin binding                                   | 3/2321  | 29/18352  | 0.7285435 | 0.8491053 | 0.8017868 | 3  | THBS1/PLEKHA2/LYPD5                                                                                                                                                                                                                                                     |
| Molecular Function | GO:0005125 | cytokine activity                                 | 27/2321 | 235/18352 | 0.7329187 | 0.8491053 | 0.8017868 | 27 | IL27/IL10/IL16/TNF/CCL5/TNFSF13B/WNT11/TGFB1/IL1RN/CSF3/CMTM7/CCL20/WNT5B/C10orf99/GRN/CMTM5/GDF6/TNFSF12/TNFSF13/CRLF1/SCGB3A1/CCL27/INHBA/NODAL/CCL22/LIF/VSTM1                                                                                                       |
| Molecular Function | GO:0005525 | GTP binding                                       | 44/2321 | 376/18352 | 0.7337241 | 0.8491053 | 0.8017868 | 44 | EHD1/RHOH/RAB2A/RAP1B/RAB5C/RHOG/RAB5B/DNM2/RAB31/RHEB/ANXA6/GNAZ/AGAP1/RHOF/TUBB4B/RAB27A/GNAI2/GNAT2/MTG2/RHOBTB2/RERG/RAB40C/GIMAP5/RAB43/LRRK1/GNA11/TUBA4B/TUBA4A/TUBA8/DNM1/RALA/DNM3/GNAO1/DNM1L/GNA12/RAB30/PCK2/RABL2A/ARF5/ATL1/GPN1/MX1/GIMAP8/SEPTIN9       |
| Molecular Function | GO:0015297 | antiporter activity                               | 9/2321  | 83/18352  | 0.7379696 | 0.8491053 | 0.8017868 | 9  | CLCN6/SLC35C2/SLC11A1/SLC24A4/SLC8A1/SLC19A1/SLC26A1/SLC37A1/SLC41A1                                                                                                                                                                                                    |
| Molecular Function | GO:0001972 | retinoic acid binding                             | 2/2321  | 20/18352  | 0.739472  | 0.8491053 | 0.8017868 | 2  | RXRA/RARA                                                                                                                                                                                                                                                               |



|                    |            |                                                               |        |          |           |           |           |   |              |
|--------------------|------------|---------------------------------------------------------------|--------|----------|-----------|-----------|-----------|---|--------------|
| Molecular Function | GO:0004707 | MAP kinase activity                                           | 2/2321 | 20/18352 | 0.739472  | 0.8491053 | 0.8017868 | 2 | SRPK2/MOK    |
| Molecular Function | GO:0004745 | retinol dehydrogenase activity                                | 2/2321 | 20/18352 | 0.739472  | 0.8491053 | 0.8017868 | 2 | DHRS9/RDH10  |
| Molecular Function | GO:0016408 | C-acyltransferase activity                                    | 2/2321 | 20/18352 | 0.739472  | 0.8491053 | 0.8017868 | 2 | SPTLC2/ACAT1 |
| Molecular Function | GO:0016638 | oxidoreductase activity, acting on the CH-NH2 group of donors | 2/2321 | 20/18352 | 0.739472  | 0.8491053 | 0.8017868 | 2 | LOXL3/LOXL4  |
| Molecular Function | GO:0047617 | acyl-CoA hydrolase activity                                   | 2/2321 | 20/18352 | 0.739472  | 0.8491053 | 0.8017868 | 2 | ACOT13/ACOT7 |
| Molecular Function | GO:0061608 | nuclear import signal receptor activity                       | 2/2321 | 20/18352 | 0.739472  | 0.8491053 | 0.8017868 | 2 | TNPO1/SNUPN  |
| Molecular Function | GO:0000014 | single-stranded DNA endodeoxyribonuclease activity            | 1/2321 | 10/18352 | 0.7414063 | 0.8491053 | 0.8017868 | 1 | ERCC1        |
| Molecular Function | GO:0004955 | prostaglandin receptor activity                               | 1/2321 | 10/18352 | 0.7414063 | 0.8491053 | 0.8017868 | 1 | PPARG        |
| Molecular Function | GO:0004983 | neuropeptide Y receptor activity                              | 1/2321 | 10/18352 | 0.7414063 | 0.8491053 | 0.8017868 | 1 | PRLHR        |

|                    |            |                                                                  |        |          |           |           |           |   |         |
|--------------------|------------|------------------------------------------------------------------|--------|----------|-----------|-----------|-----------|---|---------|
| Molecular Function | GO:0008641 | ubiquitin-like modifier activating enzyme activity               | 1/2321 | 10/18352 | 0.7414063 | 0.8491053 | 0.8017868 | 1 | NAE1    |
| Molecular Function | GO:0010851 | cyclase regulator activity                                       | 1/2321 | 10/18352 | 0.7414063 | 0.8491053 | 0.8017868 | 1 | RCVRN   |
| Molecular Function | GO:0015651 | quaternary ammonium group transmembrane transporter activity     | 1/2321 | 10/18352 | 0.7414063 | 0.8491053 | 0.8017868 | 1 | SLC22A5 |
| Molecular Function | GO:0016303 | 1-phosphatidylinositol-3-kinase activity                         | 1/2321 | 10/18352 | 0.7414063 | 0.8491053 | 0.8017868 | 1 | PIK3CD  |
| Molecular Function | GO:0016595 | glutamate binding                                                | 1/2321 | 10/18352 | 0.7414063 | 0.8491053 | 0.8017868 | 1 | SLC1A3  |
| Molecular Function | GO:0016884 | carbon-nitrogen ligase activity, with glutamine as amido-N-donor | 1/2321 | 10/18352 | 0.7414063 | 0.8491053 | 0.8017868 | 1 | GATB    |
| Molecular Function | GO:0016889 | endodeoxyribonuclease activity, producing 3'-phosphomonoesters   | 1/2321 | 10/18352 | 0.7414063 | 0.8491053 | 0.8017868 | 1 | SLX4    |
| Molecular Function | GO:0017002 | activin-activated receptor activity                              | 1/2321 | 10/18352 | 0.7414063 | 0.8491053 | 0.8017868 | 1 | TGFBR2  |
| Molecular Function | GO:0018455 | alcohol dehydrogenase [NAD(P)+] activity                         | 1/2321 | 10/18352 | 0.7414063 | 0.8491053 | 0.8017868 | 1 | DHRS9   |

|                    |            |                                            |        |          |           |           |           |   |         |
|--------------------|------------|--------------------------------------------|--------|----------|-----------|-----------|-----------|---|---------|
| Molecular Function | GO:0019531 | oxalate transmembrane transporter activity | 1/2321 | 10/18352 | 0.7414063 | 0.8491053 | 0.8017868 | 1 | SLC26A1 |
| Molecular Function | GO:0019911 | structural constituent of myelin sheath    | 1/2321 | 10/18352 | 0.7414063 | 0.8491053 | 0.8017868 | 1 | MBP     |
| Molecular Function | GO:0031419 | cobalamin binding                          | 1/2321 | 10/18352 | 0.7414063 | 0.8491053 | 0.8017868 | 1 | CD320   |
| Molecular Function | GO:0031720 | haptoglobin binding                        | 1/2321 | 10/18352 | 0.7414063 | 0.8491053 | 0.8017868 | 1 | HBB     |
| Molecular Function | GO:0032052 | bile acid binding                          | 1/2321 | 10/18352 | 0.7414063 | 0.8491053 | 0.8017868 | 1 | VDR     |
| Molecular Function | GO:0034511 | U3 snoRNA binding                          | 1/2321 | 10/18352 | 0.7414063 | 0.8491053 | 0.8017868 | 1 | ISG20   |
| Molecular Function | GO:0035374 | chondroitin sulfate binding                | 1/2321 | 10/18352 | 0.7414063 | 0.8491053 | 0.8017868 | 1 | ANXA6   |
| Molecular Function | GO:0045503 | dynein light chain binding                 | 1/2321 | 10/18352 | 0.7414063 | 0.8491053 | 0.8017868 | 1 | DNAI2   |
| Molecular Function | GO:0047760 | butyrate-CoA ligase activity               | 1/2321 | 10/18352 | 0.7414063 | 0.8491053 | 0.8017868 | 1 | ACSS3   |

|                    |            |                                                                              |         |           |           |           |           |    |                                                                                                            |
|--------------------|------------|------------------------------------------------------------------------------|---------|-----------|-----------|-----------|-----------|----|------------------------------------------------------------------------------------------------------------|
| Molecular Function | GO:0048256 | flap endonuclease activity                                                   | 1/2321  | 10/18352  | 0.7414063 | 0.8491053 | 0.8017868 | 1  | SLX4                                                                                                       |
| Molecular Function | GO:0051880 | G-quadruplex DNA binding                                                     | 1/2321  | 10/18352  | 0.7414063 | 0.8491053 | 0.8017868 | 1  | BLM                                                                                                        |
| Molecular Function | GO:0070008 | serine-type exopeptidase activity                                            | 1/2321  | 10/18352  | 0.7414063 | 0.8491053 | 0.8017868 | 1  | CPD                                                                                                        |
| Molecular Function | GO:0097199 | cysteine-type endopeptidase activity involved in apoptotic signaling pathway | 1/2321  | 10/18352  | 0.7414063 | 0.8491053 | 0.8017868 | 1  | CASP1                                                                                                      |
| Molecular Function | GO:0102391 | decanoate-CoA ligase activity                                                | 1/2321  | 10/18352  | 0.7414063 | 0.8491053 | 0.8017868 | 1  | ACSL1                                                                                                      |
| Molecular Function | GO:0140104 | molecular carrier activity                                                   | 1/2321  | 10/18352  | 0.7414063 | 0.8491053 | 0.8017868 | 1  | ATOX1                                                                                                      |
| Molecular Function | GO:0004252 | serine-type endopeptidase activity                                           | 19/2321 | 169/18352 | 0.7428229 | 0.8502802 | 0.8028961 | 19 | AZU1/ELANE/PRTN3/CTSG/PLAU/MBTPS1/RHBDD2/CTSH/MASP1/PCSK6/PREP/F12/C1S/HTRA4/PRSS50/TMPRSS9/LTF/HTRA3/C1RL |
| Molecular Function | GO:0005504 | fatty acid binding                                                           | 4/2321  | 39/18352  | 0.7444045 | 0.8516426 | 0.8041826 | 4  | S100A8/PPARG/ACOXL/ACOX2                                                                                   |
| Molecular Function | GO:0000295 | adenine nucleotide transmembrane transporter activity                        | 3/2321  | 30/18352  | 0.7498842 | 0.8547659 | 0.8071319 | 3  | SLC25A25/SLC33A1/SLC25A1                                                                                   |

|                    |            |                                                                                                       |        |          |           |           |           |   |                                 |
|--------------------|------------|-------------------------------------------------------------------------------------------------------|--------|----------|-----------|-----------|-----------|---|---------------------------------|
| Molecular Function | GO:0005346 | purine ribonucleotide<br>transmembrane transporter<br>activity                                        | 3/2321 | 30/18352 | 0.7498842 | 0.8547659 | 0.8071319 | 3 | SLC25A25/SLC33A1/SLC25A1        |
| Molecular Function | GO:0008157 | protein phosphatase 1<br>binding                                                                      | 3/2321 | 30/18352 | 0.7498842 | 0.8547659 | 0.8071319 | 3 | FER/KCNQ1/PPP1R16B              |
| Molecular Function | GO:0033764 | steroid dehydrogenase<br>activity, acting on the CH-OH<br>group of donors, NAD or<br>NADP as acceptor | 3/2321 | 30/18352 | 0.7498842 | 0.8547659 | 0.8071319 | 3 | DHRS9/HSD17B2/HSD11B2           |
| Molecular Function | GO:0043325 | phosphatidylinositol-3,4-<br>bisphosphate binding                                                     | 3/2321 | 30/18352 | 0.7498842 | 0.8547659 | 0.8071319 | 3 | GAB2/PLEKHA2/DAPP1              |
| Molecular Function | GO:0045505 | dynein intermediate chain<br>binding                                                                  | 3/2321 | 30/18352 | 0.7498842 | 0.8547659 | 0.8071319 | 3 | DNAH3/DYNC1H1/HTT               |
| Molecular Function | GO:0046966 | thyroid hormone receptor<br>binding                                                                   | 3/2321 | 30/18352 | 0.7498842 | 0.8547659 | 0.8071319 | 3 | PRMT2/MED13/TRIP12              |
| Molecular Function | GO:0008009 | chemokine activity                                                                                    | 5/2321 | 49/18352 | 0.7593257 | 0.8650747 | 0.8168662 | 5 | CCL5/CCL20/C10orf99/CCL27/CCL22 |
| Molecular Function | GO:0003899 | DNA-directed 5'-3' RNA<br>polymerase activity                                                         | 4/2321 | 40/18352 | 0.7623979 | 0.8667547 | 0.8184526 | 4 | POLR2F/CRCP/RPAP1/POLR1D        |
| Molecular Function | GO:0031492 | nucleosomal DNA binding                                                                               | 4/2321 | 40/18352 | 0.7623979 | 0.8667547 | 0.8184526 | 4 | RCC1/HDAC1/MTA2/SMARCD2         |

|                    |            |                                                                                       |         |           |           |           |           |    |                                                                                       |
|--------------------|------------|---------------------------------------------------------------------------------------|---------|-----------|-----------|-----------|-----------|----|---------------------------------------------------------------------------------------|
| Molecular Function | GO:0004298 | threonine-type endopeptidase activity                                                 | 2/2321  | 21/18352  | 0.7639869 | 0.8667547 | 0.8184526 | 2  | PRSS50/PSMB7                                                                          |
| Molecular Function | GO:0005243 | gap junction channel activity                                                         | 2/2321  | 21/18352  | 0.7639869 | 0.8667547 | 0.8184526 | 2  | GJA5/GJB3                                                                             |
| Molecular Function | GO:0005385 | zinc ion transmembrane transporter activity                                           | 2/2321  | 21/18352  | 0.7639869 | 0.8667547 | 0.8184526 | 2  | SLC39A11/SLC39A13                                                                     |
| Molecular Function | GO:0008106 | alcohol dehydrogenase (NADP+) activity                                                | 2/2321  | 21/18352  | 0.7639869 | 0.8667547 | 0.8184526 | 2  | AKR1D1/RDH10                                                                          |
| Molecular Function | GO:0008483 | transaminase activity                                                                 | 2/2321  | 21/18352  | 0.7639869 | 0.8667547 | 0.8184526 | 2  | AGXT/GFPT2                                                                            |
| Molecular Function | GO:0050750 | low-density lipoprotein particle receptor binding                                     | 2/2321  | 21/18352  | 0.7639869 | 0.8667547 | 0.8184526 | 2  | AP2A1/CLU                                                                             |
| Molecular Function | GO:0016616 | oxidoreductase activity, acting on the CH-OH group of donors, NAD or NADP as acceptor | 13/2321 | 120/18352 | 0.7647951 | 0.8672194 | 0.8188914 | 13 | KCNAB2/DHRS9/BDH1/AKR1D1/HSD17B2/RDH10/CTBP1/HIBADH/CTBP2/HSD11B2/ZADH2/IMPDH1/PRXL2B |
| Molecular Function | GO:0070003 | threonine-type peptidase activity                                                     | 3/2321  | 31/18352  | 0.7698566 | 0.868749  | 0.8203357 | 3  | GGT1/PRSS50/PSMB7                                                                     |
| Molecular Function | GO:0004869 | cysteine-type endopeptidase inhibitor activity                                        | 6/2321  | 59/18352  | 0.7731465 | 0.868749  | 0.8203357 | 6  | CSTA/RPS6KA1/ARRB1/UBE2O/NOL3/LTF                                                     |

|                    |            |                                                                         |        |          |           |          |           |   |         |
|--------------------|------------|-------------------------------------------------------------------------|--------|----------|-----------|----------|-----------|---|---------|
| Molecular Function | GO:0004596 | peptide alpha-N-acetyltransferase activity                              | 1/2321 | 11/18352 | 0.7741288 | 0.868749 | 0.8203357 | 1 | NAA16   |
| Molecular Function | GO:0004954 | prostanoid receptor activity                                            | 1/2321 | 11/18352 | 0.7741288 | 0.868749 | 0.8203357 | 1 | PPARG   |
| Molecular Function | GO:0005391 | sodium:potassium-exchanging ATPase activity                             | 1/2321 | 11/18352 | 0.7741288 | 0.868749 | 0.8203357 | 1 | FXD2    |
| Molecular Function | GO:0005436 | sodium:phosphate symporter activity                                     | 1/2321 | 11/18352 | 0.7741288 | 0.868749 | 0.8203357 | 1 | MFSD2A  |
| Molecular Function | GO:0008532 | N-acetyllactosaminide beta-1,3-N-acetylglucosaminyltransferase activity | 1/2321 | 11/18352 | 0.7741288 | 0.868749 | 0.8203357 | 1 | B3GNT2  |
| Molecular Function | GO:0008556 | potassium transmembrane transporter activity, phosphorylative mechanism | 1/2321 | 11/18352 | 0.7741288 | 0.868749 | 0.8203357 | 1 | FXD2    |
| Molecular Function | GO:0015280 | ligand-gated sodium channel activity                                    | 1/2321 | 11/18352 | 0.7741288 | 0.868749 | 0.8203357 | 1 | ASIC4   |
| Molecular Function | GO:0015378 | sodium:chloride symporter activity                                      | 1/2321 | 11/18352 | 0.7741288 | 0.868749 | 0.8203357 | 1 | SLC12A1 |
| Molecular Function | GO:0015643 | toxic substance binding                                                 | 1/2321 | 11/18352 | 0.7741288 | 0.868749 | 0.8203357 | 1 | AZU1    |

|                    |            |                                                                                           |        |          |           |          |           |   |        |
|--------------------|------------|-------------------------------------------------------------------------------------------|--------|----------|-----------|----------|-----------|---|--------|
| Molecular Function | GO:0016273 | arginine N-methyltransferase activity                                                     | 1/2321 | 11/18352 | 0.7741288 | 0.868749 | 0.8203357 | 1 | PRMT2  |
| Molecular Function | GO:0016274 | protein-arginine N-methyltransferase activity                                             | 1/2321 | 11/18352 | 0.7741288 | 0.868749 | 0.8203357 | 1 | PRMT2  |
| Molecular Function | GO:0016813 | hydrolase activity, acting on carbon-nitrogen (but not peptide) bonds, in linear amidines | 1/2321 | 11/18352 | 0.7741288 | 0.868749 | 0.8203357 | 1 | PADI2  |
| Molecular Function | GO:0016857 | racemase and epimerase activity, acting on carbohydrates and derivatives                  | 1/2321 | 11/18352 | 0.7741288 | 0.868749 | 0.8203357 | 1 | DSE    |
| Molecular Function | GO:0019855 | calcium channel inhibitor activity                                                        | 1/2321 | 11/18352 | 0.7741288 | 0.868749 | 0.8203357 | 1 | ITPR1  |
| Molecular Function | GO:0031956 | medium-chain fatty acid-CoA ligase activity                                               | 1/2321 | 11/18352 | 0.7741288 | 0.868749 | 0.8203357 | 1 | ACSL1  |
| Molecular Function | GO:0032404 | mismatch repair complex binding                                                           | 1/2321 | 11/18352 | 0.7741288 | 0.868749 | 0.8203357 | 1 | MUTYH  |
| Molecular Function | GO:0047676 | arachidonate-CoA ligase activity                                                          | 1/2321 | 11/18352 | 0.7741288 | 0.868749 | 0.8203357 | 1 | ACSL1  |
| Molecular Function | GO:1901612 | cardiolipin binding                                                                       | 1/2321 | 11/18352 | 0.7741288 | 0.868749 | 0.8203357 | 1 | ATP8B1 |



|                    |            |                                                          |         |           |           |           |           |    |                                                                                                 |
|--------------------|------------|----------------------------------------------------------|---------|-----------|-----------|-----------|-----------|----|-------------------------------------------------------------------------------------------------|
| Molecular Function | GO:0016860 | intramolecular oxidoreductase activity                   | 5/2321  | 50/18352  | 0.7749505 | 0.8692228 | 0.8207831 | 5  | P4HB/IDI1/PDIA5/ITGB3/GLRX2                                                                     |
| Molecular Function | GO:0016614 | oxidoreductase activity, acting on CH-OH group of donors | 14/2321 | 130/18352 | 0.7781756 | 0.8723906 | 0.8237744 | 14 | KCNAB2/DHRS9/BDH1/D2HGDH/AKR1D1/HSD17B2/RDH10/CTBP1/HIBADH/CTBP2/HSD11B2/ZADH2/IMPDH1/PRXL2B    |
| Molecular Function | GO:0016853 | isomerase activity                                       | 17/2321 | 156/18352 | 0.7792645 | 0.8724025 | 0.8237856 | 17 | P4HB/DSE/IDI1/FKBP5/DHRS9/TOP1MT/AMACR/AIP/PDIA5/ENOSF1/PGAM1/ITGB3/PMM2/PUS7/GLRX2/HMGCS1/PTPA |
| Molecular Function | GO:0004812 | aminoacyl-tRNA ligase activity                           | 4/2321  | 41/18352  | 0.779389  | 0.8724025 | 0.8237856 | 4  | CARS2/EARS2/MARS1/YARS1                                                                         |
| Molecular Function | GO:0016875 | ligase activity, forming carbon-oxygen bonds             | 4/2321  | 41/18352  | 0.779389  | 0.8724025 | 0.8237856 | 4  | CARS2/EARS2/MARS1/YARS1                                                                         |
| Molecular Function | GO:0005242 | inward rectifier potassium channel activity              | 2/2321  | 22/18352  | 0.7864712 | 0.8771527 | 0.8282712 | 2  | KCNJ15/KCNK6                                                                                    |
| Molecular Function | GO:0015035 | protein disulfide oxidoreductase activity                | 2/2321  | 22/18352  | 0.7864712 | 0.8771527 | 0.8282712 | 2  | STAB2/GLRX2                                                                                     |
| Molecular Function | GO:0015645 | fatty acid ligase activity                               | 2/2321  | 22/18352  | 0.7864712 | 0.8771527 | 0.8282712 | 2  | ACSL1/ACSF3                                                                                     |
| Molecular Function | GO:0016289 | CoA hydrolase activity                                   | 2/2321  | 22/18352  | 0.7864712 | 0.8771527 | 0.8282712 | 2  | ACOT13/ACOT7                                                                                    |

|                    |            |                                         |         |           |           |           |           |    |                                                                                                                                      |
|--------------------|------------|-----------------------------------------|---------|-----------|-----------|-----------|-----------|----|--------------------------------------------------------------------------------------------------------------------------------------|
| Molecular Function | GO:0016917 | GABA receptor activity                  | 2/2321  | 22/18352  | 0.7864712 | 0.8771527 | 0.8282712 | 2  | GABBR1/GABBR2                                                                                                                        |
| Molecular Function | GO:0017049 | GTP-Rho binding                         | 2/2321  | 22/18352  | 0.7864712 | 0.8771527 | 0.8282712 | 2  | WHAMM/CDC42EP1                                                                                                                       |
| Molecular Function | GO:0033691 | sialic acid binding                     | 2/2321  | 22/18352  | 0.7864712 | 0.8771527 | 0.8282712 | 2  | FCN1/CD33                                                                                                                            |
| Molecular Function | GO:0005253 | anion channel activity                  | 9/2321  | 87/18352  | 0.7868576 | 0.8771527 | 0.8282712 | 9  | CLCN6/FXYD1/ANO7/LRRC8C/LRRC8B/ANO10/ANO6/ANO8/PACC1                                                                                 |
| Molecular Function | GO:0015020 | glucuronosyltransferase activity        | 3/2321  | 32/18352  | 0.7885051 | 0.8780896 | 0.8291558 | 3  | CSGALNACT1/CHSY1/B4GAT1                                                                                                              |
| Molecular Function | GO:0019239 | deaminase activity                      | 3/2321  | 32/18352  | 0.7885051 | 0.8780896 | 0.8291558 | 3  | CDA/AMPD3/DCTD                                                                                                                       |
| Molecular Function | GO:0061135 | endopeptidase regulator activity        | 21/2321 | 192/18352 | 0.7931223 | 0.8827796 | 0.8335845 | 21 | SLPI/NLRC4/CSTA/TIMP2/SERPINA1/SPOCK2/RPS6KA1/APLP2/SERPINB11/ARRB1/SPINT2/SERPINB2/BIN1/APP/UBE2O/PSMF1/CRIM1/NOL3/LTF/COL28A1/VSIR |
| Molecular Function | GO:0004032 | alditol:NADP+ 1-oxidoreductase activity | 1/2321  | 12/18352  | 0.8027122 | 0.8857513 | 0.8363906 | 1  | AKR1D1                                                                                                                               |
| Molecular Function | GO:0004126 | cytidine deaminase activity             | 1/2321  | 12/18352  | 0.8027122 | 0.8857513 | 0.8363906 | 1  | CDA                                                                                                                                  |

|                    |            |                                                                      |        |          |           |           |           |   |         |
|--------------------|------------|----------------------------------------------------------------------|--------|----------|-----------|-----------|-----------|---|---------|
| Molecular Function | GO:0004303 | estradiol 17-beta-dehydrogenase activity                             | 1/2321 | 12/18352 | 0.8027122 | 0.8857513 | 0.8363906 | 1 | HSD17B2 |
| Molecular Function | GO:0004861 | cyclin-dependent protein serine/threonine kinase inhibitor activity  | 1/2321 | 12/18352 | 0.8027122 | 0.8857513 | 0.8363906 | 1 | HEXIM1  |
| Molecular Function | GO:0008174 | mRNA methyltransferase activity                                      | 1/2321 | 12/18352 | 0.8027122 | 0.8857513 | 0.8363906 | 1 | METTL8  |
| Molecular Function | GO:0008554 | sodium transmembrane transporter activity, phosphorylative mechanism | 1/2321 | 12/18352 | 0.8027122 | 0.8857513 | 0.8363906 | 1 | FXVD2   |
| Molecular Function | GO:0015269 | calcium-activated potassium channel activity                         | 1/2321 | 12/18352 | 0.8027122 | 0.8857513 | 0.8363906 | 1 | KCNN1   |
| Molecular Function | GO:0016004 | phospholipase activator activity                                     | 1/2321 | 12/18352 | 0.8027122 | 0.8857513 | 0.8363906 | 1 | CCL5    |
| Molecular Function | GO:0042975 | peroxisome proliferator activated receptor binding                   | 1/2321 | 12/18352 | 0.8027122 | 0.8857513 | 0.8363906 | 1 | PRMT2   |
| Molecular Function | GO:0043176 | amine binding                                                        | 1/2321 | 12/18352 | 0.8027122 | 0.8857513 | 0.8363906 | 1 | HTR3A   |
| Molecular Function | GO:0043295 | glutathione binding                                                  | 1/2321 | 12/18352 | 0.8027122 | 0.8857513 | 0.8363906 | 1 | MGST2   |

|                    |            |                                           |         |           |           |           |           |    |                                                                                                                                                                                                                           |
|--------------------|------------|-------------------------------------------|---------|-----------|-----------|-----------|-----------|----|---------------------------------------------------------------------------------------------------------------------------------------------------------------------------------------------------------------------------|
| Molecular Function | GO:0051378 | serotonin binding                         | 1/2321  | 12/18352  | 0.8027122 | 0.8857513 | 0.8363906 | 1  | HTR3A                                                                                                                                                                                                                     |
| Molecular Function | GO:0052650 | NADP-retinol dehydrogenase activity       | 1/2321  | 12/18352  | 0.8027122 | 0.8857513 | 0.8363906 | 1  | RDH10                                                                                                                                                                                                                     |
| Molecular Function | GO:0070410 | co-SMAD binding                           | 1/2321  | 12/18352  | 0.8027122 | 0.8857513 | 0.8363906 | 1  | SMAD3                                                                                                                                                                                                                     |
| Molecular Function | GO:0097157 | pre-mRNA intronic binding                 | 1/2321  | 12/18352  | 0.8027122 | 0.8857513 | 0.8363906 | 1  | PRPF8                                                                                                                                                                                                                     |
| Molecular Function | GO:0102991 | myristoyl-CoA hydrolase activity          | 1/2321  | 12/18352  | 0.8027122 | 0.8857513 | 0.8363906 | 1  | ACOT7                                                                                                                                                                                                                     |
| Molecular Function | GO:0140161 | monocarboxylate:sodium symporter activity | 1/2321  | 12/18352  | 0.8027122 | 0.8857513 | 0.8363906 | 1  | SLC10A1                                                                                                                                                                                                                   |
| Molecular Function | GO:0004601 | peroxidase activity                       | 5/2321  | 52/18352  | 0.8038445 | 0.8865512 | 0.8371459 | 5  | MPO/LPO/HBB/MGST2/CAT                                                                                                                                                                                                     |
| Molecular Function | GO:0046982 | protein heterodimerization activity       | 36/2321 | 321/18352 | 0.804709  | 0.8869979 | 0.8375677 | 36 | P4HB/SLC51A/MEF2D/YWHAH/PIK3R1/CEACAM6/ABCG1/RCC1/FBXO7/TCF12/PHB/JAM3/PSMF1/PDGFB/PPP2R1A/DGKD/ABTB2/ARNTL/IRAK2/ADD1/BCL2/TCF3/ZHX2/MEF2C/EPAS1/USF2/CEBPB/AGTR1/GABBR2/PGLYRP4/BCL2L1/SDCBP2/POLE4/NAE1/MACROH2A2/H3C1 |
| Molecular Function | GO:0001530 | lipopolysaccharide binding                | 3/2321  | 33/18352  | 0.80588   | 0.8869979 | 0.8375677 | 3  | RNASE3/SPON2/LTF                                                                                                                                                                                                          |

|                    |            |                                                       |         |           |           |           |           |    |                                                                                                                                                               |
|--------------------|------------|-------------------------------------------------------|---------|-----------|-----------|-----------|-----------|----|---------------------------------------------------------------------------------------------------------------------------------------------------------------|
| Molecular Function | GO:0005251 | delayed rectifier potassium channel activity          | 3/2321  | 33/18352  | 0.80588   | 0.8869979 | 0.8375677 | 3  | KCNE1/KCNQ2/KCNQ1                                                                                                                                             |
| Molecular Function | GO:0035198 | miRNA binding                                         | 3/2321  | 33/18352  | 0.80588   | 0.8869979 | 0.8375677 | 3  | ZC3H7A/AGO1/AGO2                                                                                                                                              |
| Molecular Function | GO:0016769 | transferase activity, transferring nitrogenous groups | 2/2321  | 23/18352  | 0.8070461 | 0.8873837 | 0.837932  | 2  | AGXT/GFPT2                                                                                                                                                    |
| Molecular Function | GO:0035250 | UDP-galactosyltransferase activity                    | 2/2321  | 23/18352  | 0.8070461 | 0.8873837 | 0.837932  | 2  | B4GALT7/B4GALT3                                                                                                                                               |
| Molecular Function | GO:0005506 | iron ion binding                                      | 16/2321 | 151/18352 | 0.8101105 | 0.8903032 | 0.8406888 | 16 | CALR/LCN2/FECH/FDX1/CYP4F3/FTO/TET2/KDM7A/FA2H/LTF/ADI1/P4HA2/SCD/AOX1/P3H3/P3H1                                                                              |
| Molecular Function | GO:0061134 | peptidase regulator activity                          | 25/2321 | 229/18352 | 0.8127632 | 0.8927677 | 0.8430159 | 25 | SLPI/NLRC4/CSTA/TIMP2/SERPINA1/SPOCK2/RPS6KA1/APLP2/SERPINB1/ARRB1/SPINT2/SERPINB2/BIN1/CTSH/APP/UBE2O/ATP2A3/PSMF1/CRIM1/NOL3/LTF/CASP1/BCL2L13/COL28A1/VSIR |
| Molecular Function | GO:0005201 | extracellular matrix structural constituent           | 18/2321 | 169/18352 | 0.814824  | 0.8945797 | 0.844727  | 18 | LTBP1/COL23A1/MFAP4/COL17A1/EMILIN2/CHI3L1/TGFB1/COL4A2/COLQ/THBS1/TNXB/COL12A1/COL14A1/SBSPON/AEBP1/COL5A1/COL28A1/LAMB3                                     |
| Molecular Function | GO:0052689 | carboxylic ester hydrolase activity                   | 15/2321 | 143/18352 | 0.8161215 | 0.8955524 | 0.8456455 | 15 | PNPLA2/PLA2G15/MGLL/LIPC/ABHD16A/APMAP/AOAH/NDST1/ACOT7/ABHD16B/CA1/PLA1A/ABHD5/ASPG/LYPLA2                                                                   |
| Molecular Function | GO:0008236 | serine-type peptidase activity                        | 20/2321 | 187/18352 | 0.8196648 | 0.8989871 | 0.8488888 | 20 | AZU1/ELANE/PRTN3/CTSG/PLAU/MBTPS1/RHBDD2/CPD/CTSH/MASP1/PCSK6/PREP/F12/C1S/HTRA4/PRSS50/TMPRSS9/LTF/HTRA3/C1RL                                                |

|                    |            |                                                                |         |           |           |           |           |    |                                                                                            |
|--------------------|------------|----------------------------------------------------------------|---------|-----------|-----------|-----------|-----------|----|--------------------------------------------------------------------------------------------|
| Molecular Function | GO:0003730 | mRNA 3'-UTR binding                                            | 12/2321 | 117/18352 | 0.8200778 | 0.8989871 | 0.8488888 | 12 | PABPC4/MIR101-2/LARP1/PCBP4/ZNF385A/CPEB3/DAZAP1/IGF2BP3/ILF3/SECISBP2/RNF40/TUT1          |
| Molecular Function | GO:0005272 | sodium channel activity                                        | 4/2321  | 44/18352  | 0.824607  | 0.900966  | 0.8507574 | 4  | TRPM2/GRIK4/SCN1A/ASIC4                                                                    |
| Molecular Function | GO:0070696 | transmembrane receptor protein serine/threonine kinase binding | 2/2321  | 24/18352  | 0.8258348 | 0.900966  | 0.8507574 | 2  | INHBA/NODAL                                                                                |
| Molecular Function | GO:0008083 | growth factor activity                                         | 17/2321 | 162/18352 | 0.8276184 | 0.900966  | 0.8507574 | 17 | TGFA/IL10/TGFB1/PDGFD/CSF3/GMFB/CD320/GRN/PDGFβ/PDGFγ/GDF6/GMFG/INHBA/NODAL/NTF4/LIF/FGF14 |
| Molecular Function | GO:0004467 | long-chain fatty acid-CoA ligase activity                      | 1/2321  | 13/18352  | 0.8276797 | 0.900966  | 0.8507574 | 1  | ACSL1                                                                                      |
| Molecular Function | GO:0005452 | inorganic anion exchanger activity                             | 1/2321  | 13/18352  | 0.8276797 | 0.900966  | 0.8507574 | 1  | SLC22A11                                                                                   |
| Molecular Function | GO:0009982 | pseudouridine synthase activity                                | 1/2321  | 13/18352  | 0.8276797 | 0.900966  | 0.8507574 | 1  | PUS7                                                                                       |
| Molecular Function | GO:0015271 | outward rectifier potassium channel activity                   | 1/2321  | 13/18352  | 0.8276797 | 0.900966  | 0.8507574 | 1  | KCNQ1                                                                                      |
| Molecular Function | GO:0017017 | MAP kinase tyrosine/serine/threonine phosphatase activity      | 1/2321  | 13/18352  | 0.8276797 | 0.900966  | 0.8507574 | 1  | DUSP14                                                                                     |

|                    |            |                                                    |         |           |           |           |           |    |  |                                                                                                                                                                                                                                              |
|--------------------|------------|----------------------------------------------------|---------|-----------|-----------|-----------|-----------|----|--|----------------------------------------------------------------------------------------------------------------------------------------------------------------------------------------------------------------------------------------------|
| Molecular Function | GO:0030548 | acetylcholine receptor regulator activity          | 1/2321  | 13/18352  | 0.8276797 | 0.900966  | 0.8507574 | 1  |  | LY6G6D                                                                                                                                                                                                                                       |
| Molecular Function | GO:0031005 | filamin binding                                    | 1/2321  | 13/18352  | 0.8276797 | 0.900966  | 0.8507574 | 1  |  | RFLNA                                                                                                                                                                                                                                        |
| Molecular Function | GO:0036122 | BMP binding                                        | 1/2321  | 13/18352  | 0.8276797 | 0.900966  | 0.8507574 | 1  |  | ENG                                                                                                                                                                                                                                          |
| Molecular Function | GO:0099602 | neurotransmitter receptor regulator activity       | 1/2321  | 13/18352  | 0.8276797 | 0.900966  | 0.8507574 | 1  |  | LY6G6D                                                                                                                                                                                                                                       |
| Molecular Function | GO:1900750 | oligopeptide binding                               | 1/2321  | 13/18352  | 0.8276797 | 0.900966  | 0.8507574 | 1  |  | MGST2                                                                                                                                                                                                                                        |
| Molecular Function | GO:1990825 | sequence-specific mRNA binding                     | 1/2321  | 13/18352  | 0.8276797 | 0.900966  | 0.8507574 | 1  |  | SHFL                                                                                                                                                                                                                                         |
| Molecular Function | GO:0015078 | proton transmembrane transporter activity          | 13/2321 | 127/18352 | 0.8295537 | 0.9021379 | 0.851864  | 13 |  | SLC45A4/SLC11A1/SLC11A2/SLC2A9/ATP6V1B2/ATP2A3/SLC36A3/SLC33A1/ATP6V0B/NDUFA4L2/ATP5PD/ATP6V0C/ATP6V1C1                                                                                                                                      |
| Molecular Function | GO:0005261 | cation channel activity                            | 37/2321 | 334/18352 | 0.8295855 | 0.9021379 | 0.851864  | 37 |  | TRPM2/KCNJ15/KCNE1/KCNAB2/ITPR2/CACNA1C/CACNA2D4/SLC24A4/PKD1L1/ANXA6/KCNN1/KCNQ2/ITPR1/TRPM6/RASA3/KCNIP1/GRIK4/SCN1A/KCNK6/ASIC4/AQP1/HTR3A/CNGA4/TPCN2/KCNQ1/TRPM3/P2RX1/TMEM37/TMC1/ANO10/ANO6/CACNA1B/P2RX5/TRPV2/ATP5PD/CALHM5/ATP6V0C |
| Molecular Function | GO:0015103 | inorganic anion transmembrane transporter activity | 15/2321 | 145/18352 | 0.8318854 | 0.9041872 | 0.853799  | 15 |  | CLCN6/FXYD1/ANO7/LRRC8C/SLC13A4/SLC26A1/SLC22A11/SLC37A1/LRRC8B/ANO10/ANO6/SLC12A1/ANO8/SLC12A7/PACC1                                                                                                                                        |

|                    |            |                                                     |         |           |           |           |           |    |                                                                                                                                                                              |
|--------------------|------------|-----------------------------------------------------|---------|-----------|-----------|-----------|-----------|----|------------------------------------------------------------------------------------------------------------------------------------------------------------------------------|
| Molecular Function | GO:0030246 | carbohydrate binding                                | 29/2321 | 267/18352 | 0.8356381 | 0.9078126 | 0.8572224 | 29 | BSG/CALR/GALNT2/SLC2A5/HK1/OLR1/CLEC9A/CHI3L1/GALNT12/CLEC4C/SFTPD/LMAN2/MGAM/CLEC5A/COLEC12/ASGR2/FCN1/HK2/ENG/GALNT9/CHI3L2/P4HA2/MAN2C1/CD33/EVA1C/CLN5/P3H3/NECTIN1/P3H1 |
| Molecular Function | GO:0046625 | sphingolipid binding                                | 2/2321  | 25/18352  | 0.8429597 | 0.9141877 | 0.8632422 | 2  | TRAF2/PLTP                                                                                                                                                                   |
| Molecular Function | GO:0051861 | glycolipid binding                                  | 2/2321  | 25/18352  | 0.8429597 | 0.9141877 | 0.8632422 | 2  | PIGU/CEACAM5                                                                                                                                                                 |
| Molecular Function | GO:0015108 | chloride transmembrane transporter activity         | 10/2321 | 102/18352 | 0.8458956 | 0.9141877 | 0.8632422 | 10 | CLCN6/FXYD1/ANO7/SLC26A1/ANO10/ANO6/SLC12A1/ANO8/SLC12A7/PACC1                                                                                                               |
| Molecular Function | GO:0017171 | serine hydrolase activity                           | 20/2321 | 191/18352 | 0.8463932 | 0.9141877 | 0.8632422 | 20 | AZU1/ELANE/PRTN3/CTSG/PLAU/MBTPS1/RHBDD2/CPD/CTSH/MASP1/PCSK6/PREP/F12/C1S/HTRA4/PRSS50/TMPRSS9/LTF/HTRA3/C1RL                                                               |
| Molecular Function | GO:0008135 | translation factor activity, RNA binding            | 8/2321  | 84/18352  | 0.8491447 | 0.9141877 | 0.8632422 | 8  | EIF2B5/AGO2/EIF3M/COP55/CPEB3/EIF3H/EIF4G1/EEF1D                                                                                                                             |
| Molecular Function | GO:0004535 | poly(A)-specific ribonuclease activity              | 1/2321  | 14/18352  | 0.8494887 | 0.9141877 | 0.8632422 | 1  | TOE1                                                                                                                                                                         |
| Molecular Function | GO:0005095 | GTPase inhibitor activity                           | 1/2321  | 14/18352  | 0.8494887 | 0.9141877 | 0.8632422 | 1  | RHOH                                                                                                                                                                         |
| Molecular Function | GO:0005172 | vascular endothelial growth factor receptor binding | 1/2321  | 14/18352  | 0.8494887 | 0.9141877 | 0.8632422 | 1  | ITGB3                                                                                                                                                                        |



|                    |            |                                                                     |        |          |           |           |           |   |         |
|--------------------|------------|---------------------------------------------------------------------|--------|----------|-----------|-----------|-----------|---|---------|
| Molecular Function | GO:0015355 | secondary active monocarboxylate transmembrane transporter activity | 1/2321 | 14/18352 | 0.8494887 | 0.9141877 | 0.8632422 | 1 | SLC10A1 |
| Molecular Function | GO:0015562 | efflux transmembrane transporter activity                           | 1/2321 | 14/18352 | 0.8494887 | 0.9141877 | 0.8632422 | 1 | ABCC1   |
| Molecular Function | GO:0015926 | glucosidase activity                                                | 1/2321 | 14/18352 | 0.8494887 | 0.9141877 | 0.8632422 | 1 | MGAM    |
| Molecular Function | GO:0016290 | palmitoyl-CoA hydrolase activity                                    | 1/2321 | 14/18352 | 0.8494887 | 0.9141877 | 0.8632422 | 1 | ACOT7   |
| Molecular Function | GO:0016863 | intramolecular oxidoreductase activity, transposing C=C bonds       | 1/2321 | 14/18352 | 0.8494887 | 0.9141877 | 0.8632422 | 1 | IDI1    |
| Molecular Function | GO:0030280 | structural constituent of skin epidermis                            | 1/2321 | 14/18352 | 0.8494887 | 0.9141877 | 0.8632422 | 1 | PKP1    |
| Molecular Function | GO:0030983 | mismatched DNA binding                                              | 1/2321 | 14/18352 | 0.8494887 | 0.9141877 | 0.8632422 | 1 | MUTYH   |
| Molecular Function | GO:0045028 | G protein-coupled purinergic nucleotide receptor activity           | 1/2321 | 14/18352 | 0.8494887 | 0.9141877 | 0.8632422 | 1 | P2RY6   |
| Molecular Function | GO:0045504 | dynein heavy chain binding                                          | 1/2321 | 14/18352 | 0.8494887 | 0.9141877 | 0.8632422 | 1 | DNAI2   |

|                    |            |                                                                             |         |           |           |           |           |    |                                                                                                                                                                                                                                                                                                       |
|--------------------|------------|-----------------------------------------------------------------------------|---------|-----------|-----------|-----------|-----------|----|-------------------------------------------------------------------------------------------------------------------------------------------------------------------------------------------------------------------------------------------------------------------------------------------------------|
| Molecular Function | GO:0051139 | metal ion:proton antiporter activity                                        | 1/2321  | 14/18352  | 0.8494887 | 0.9141877 | 0.8632422 | 1  | SLC11A1                                                                                                                                                                                                                                                                                               |
| Molecular Function | GO:0060229 | lipase activator activity                                                   | 1/2321  | 14/18352  | 0.8494887 | 0.9141877 | 0.8632422 | 1  | CCL5                                                                                                                                                                                                                                                                                                  |
| Molecular Function | GO:0016887 | ATPase activity                                                             | 47/2321 | 423/18352 | 0.8502317 | 0.9142089 | 0.8632623 | 47 | BLM/KIF13B/DNAH3/SRCAP/ABCC1/MOV10L1/MYO9B/KIF13A/RTEL1/ABCG1/DYNC1H1/ATP8A1/MCM5/ABCC2/TNNT3/WRNIP1/RECQL5/MYH9/IGHMBP2/DDX27/SMARCA2/KIF21B/MYO5A/ATF7IP/MCM2/SMARCAL1/ABCA1/KIF5C/ATP2A3/RNF213/ABCC3/DHX16/CHD9/DMC1/KIF1B/ABCB8/DDX41/TOR1B/ABCC11/MYO1C/CHD8/RUVBL1/KIFC3/ERCC2/TOR3A/PTPA/FBH1 |
| Molecular Function | GO:0005484 | SNAP receptor activity                                                      | 3/2321  | 36/18352  | 0.850918  | 0.9142089 | 0.8632623 | 3  | STX5/VTI1A/TSNARE1                                                                                                                                                                                                                                                                                    |
| Molecular Function | GO:0005501 | retinoid binding                                                            | 3/2321  | 36/18352  | 0.850918  | 0.9142089 | 0.8632623 | 3  | RXRA/RARA/ALDH1A2                                                                                                                                                                                                                                                                                     |
| Molecular Function | GO:0004866 | endopeptidase inhibitor activity                                            | 19/2321 | 183/18352 | 0.851189  | 0.9142089 | 0.8632623 | 19 | SLPI/CSTA/TIMP2/SERPINA1/SPOCK2/RPS6KA1/APLP2/SERPINB11/ARRB1/SPINT2/SERPINB2/BIN1/APP/UBE2O/PSMF1/CRIM1/NOL3/LTF/COL28A1                                                                                                                                                                             |
| Molecular Function | GO:0005254 | chloride channel activity                                                   | 7/2321  | 75/18352  | 0.8522196 | 0.9145206 | 0.8635566 | 7  | CLCN6/FXYD1/ANO7/ANO10/ANO6/ANO8/PACC1                                                                                                                                                                                                                                                                |
| Molecular Function | GO:0016684 | oxidoreductase activity, acting on peroxide as acceptor                     | 5/2321  | 56/18352  | 0.85274   | 0.9145206 | 0.8635566 | 5  | MPO/LPO/HBB/MGST2/CAT                                                                                                                                                                                                                                                                                 |
| Molecular Function | GO:0016765 | transferase activity, transferring alkyl or aryl (other than methyl) groups | 5/2321  | 56/18352  | 0.85274   | 0.9145206 | 0.8635566 | 5  | GSTM5/MGST2/GSTO1/MAT1A/GSTO2                                                                                                                                                                                                                                                                         |

|                    |            |                                                                                       |        |          |           |           |           |   |                                          |
|--------------------|------------|---------------------------------------------------------------------------------------|--------|----------|-----------|-----------|-----------|---|------------------------------------------|
| Molecular Function | GO:0000049 | tRNA binding                                                                          | 6/2321 | 66/18352 | 0.8567281 | 0.9171258 | 0.8660166 | 6 | TRNAU1AP/IGHMBP2/EARS2/PTCD1/MARS1/YARS1 |
| Molecular Function | GO:0003707 | steroid hormone receptor activity                                                     | 2/2321 | 26/18352 | 0.858541  | 0.9171258 | 0.8660166 | 2 | RXRA/ESRRB                               |
| Molecular Function | GO:0005347 | ATP transmembrane transporter activity                                                | 2/2321 | 26/18352 | 0.858541  | 0.9171258 | 0.8660166 | 2 | SLC25A25/SLC25A1                         |
| Molecular Function | GO:0015252 | proton channel activity                                                               | 2/2321 | 26/18352 | 0.858541  | 0.9171258 | 0.8660166 | 2 | ATP5PD/ATP6V0C                           |
| Molecular Function | GO:0016628 | oxidoreductase activity, acting on the CH-CH group of donors, NAD or NADP as acceptor | 2/2321 | 26/18352 | 0.858541  | 0.9171258 | 0.8660166 | 2 | AKR1D1/ZADH2                             |
| Molecular Function | GO:0017075 | syntaxin-1 binding                                                                    | 2/2321 | 26/18352 | 0.858541  | 0.9171258 | 0.8660166 | 2 | RNF40/SYPL2                              |
| Molecular Function | GO:0035925 | mRNA 3'-UTR AU-rich region binding                                                    | 2/2321 | 26/18352 | 0.858541  | 0.9171258 | 0.8660166 | 2 | CPEB3/ILF3                               |
| Molecular Function | GO:0070325 | lipoprotein particle receptor binding                                                 | 2/2321 | 26/18352 | 0.858541  | 0.9171258 | 0.8660166 | 2 | AP2A1/CLU                                |
| Molecular Function | GO:0019840 | isoprenoid binding                                                                    | 3/2321 | 37/18352 | 0.8637632 | 0.9217993 | 0.8704297 | 3 | RXRA/RARA/ALDH1A2                        |

|                    |            |                                                                                                              |         |           |           |           |           |    |                                                               |
|--------------------|------------|--------------------------------------------------------------------------------------------------------------|---------|-----------|-----------|-----------|-----------|----|---------------------------------------------------------------|
| Molecular Function | GO:0048487 | beta-tubulin binding                                                                                         | 3/2321  | 37/18352  | 0.8637632 | 0.9217993 | 0.8704297 | 3  | TBCD/HTT/NDEL1                                                |
| Molecular Function | GO:0004197 | cysteine-type endopeptidase activity                                                                         | 11/2321 | 114/18352 | 0.8682953 | 0.9250808 | 0.8735283 | 11 | CTSZ/CAPN14/ADGB/CTSH/USP36/CTSB/CASP7/USP49/CASP1/USP2/USP35 |
| Molecular Function | GO:0008020 | G protein-coupled photoreceptor activity                                                                     | 1/2321  | 15/18352  | 0.8685386 | 0.9250808 | 0.8735283 | 1  | GNAT2                                                         |
| Molecular Function | GO:0019215 | intermediate filament binding                                                                                | 1/2321  | 15/18352  | 0.8685386 | 0.9250808 | 0.8735283 | 1  | PKP1                                                          |
| Molecular Function | GO:0032183 | SUMO binding                                                                                                 | 1/2321  | 15/18352  | 0.8685386 | 0.9250808 | 0.8735283 | 1  | TOLLIP                                                        |
| Molecular Function | GO:0015026 | coreceptor activity                                                                                          | 4/2321  | 48/18352  | 0.8726768 | 0.9267859 | 0.8751384 | 4  | LRP5L/ITGB3/ENG/NECTIN1                                       |
| Molecular Function | GO:0016893 | endonuclease activity, active with either ribo- or deoxyribonucleic acids and producing 5'-phosphomonoesters | 4/2321  | 48/18352  | 0.8726768 | 0.9267859 | 0.8751384 | 4  | AGO2/EDC3/DNASE1L3/SLX4                                       |
| Molecular Function | GO:0008066 | glutamate receptor activity                                                                                  | 2/2321  | 27/18352  | 0.872695  | 0.9267859 | 0.8751384 | 2  | GRIK4/GRID1                                                   |
| Molecular Function | GO:0008139 | nuclear localization sequence binding                                                                        | 2/2321  | 27/18352  | 0.872695  | 0.9267859 | 0.8751384 | 2  | TNPO1/CABP1                                                   |

|                    |            |                                              |         |           |           |           |           |    |                                                                    |
|--------------------|------------|----------------------------------------------|---------|-----------|-----------|-----------|-----------|----|--------------------------------------------------------------------|
| Molecular Function | GO:0008378 | galactosyltransferase activity               | 2/2321  | 27/18352  | 0.872695  | 0.9267859 | 0.8751384 | 2  | B4GALT7/B4GALT3                                                    |
| Molecular Function | GO:0017091 | AU-rich element binding                      | 2/2321  | 27/18352  | 0.872695  | 0.9267859 | 0.8751384 | 2  | CPEB3/ILF3                                                         |
| Molecular Function | GO:0000149 | SNARE binding                                | 11/2321 | 115/18352 | 0.8753316 | 0.9280845 | 0.8763646 | 11 | STX5/VTI1A/UVRAG/VPS18/ABCA1/SEC24C/NBAS/SYT17/RNF40/SYPL2/TSNARE1 |
| Molecular Function | GO:0003755 | peptidyl-prolyl cis-trans isomerase activity | 3/2321  | 38/18352  | 0.8756238 | 0.9280845 | 0.8763646 | 3  | FKBP5/AIP/PTPA                                                     |
| Molecular Function | GO:0005109 | frizzled binding                             | 3/2321  | 38/18352  | 0.8756238 | 0.9280845 | 0.8763646 | 3  | CCDC88C/WNT11/WNT5B                                                |
| Molecular Function | GO:0043014 | alpha-tubulin binding                        | 3/2321  | 38/18352  | 0.8756238 | 0.9280845 | 0.8763646 | 3  | SETD2/DYSF/NDEL1                                                   |
| Molecular Function | GO:0005048 | signal sequence binding                      | 4/2321  | 49/18352  | 0.8827525 | 0.9351197 | 0.8830077 | 4  | TNPO1/CAT/CABP1/BABAM2                                             |
| Molecular Function | GO:0003996 | acyl-CoA ligase activity                     | 1/2321  | 16/18352  | 0.8851783 | 0.9351197 | 0.8830077 | 1  | ACSL1                                                              |
| Molecular Function | GO:0022821 | potassium ion antiporter activity            | 1/2321  | 16/18352  | 0.8851783 | 0.9351197 | 0.8830077 | 1  | SLC24A4                                                            |

|                    |            |                                                                |         |           |           |           |           |    |                                                                                                                                                                                                                                                                                                              |
|--------------------|------------|----------------------------------------------------------------|---------|-----------|-----------|-----------|-----------|----|--------------------------------------------------------------------------------------------------------------------------------------------------------------------------------------------------------------------------------------------------------------------------------------------------------------|
| Molecular Function | GO:0022841 | potassium ion leak channel activity                            | 1/2321  | 16/18352  | 0.8851783 | 0.9351197 | 0.8830077 | 1  | KCNK6                                                                                                                                                                                                                                                                                                        |
| Molecular Function | GO:0097001 | ceramide binding                                               | 1/2321  | 16/18352  | 0.8851783 | 0.9351197 | 0.8830077 | 1  | PLTP                                                                                                                                                                                                                                                                                                         |
| Molecular Function | GO:0030414 | peptidase inhibitor activity                                   | 19/2321 | 189/18352 | 0.8853607 | 0.9351197 | 0.8830077 | 19 | SLPI/CSTA/TIMP2/SERPINA1/SPOCK2/RPS6KA1/APLP2/SERPINB11/ARRB1/SPINT2/SERPINB2/BIN1/APP/UBE2O/PSMF1/CRIM1/NOL3/LTF/COL28A1                                                                                                                                                                                    |
| Molecular Function | GO:0000030 | mannosyltransferase activity                                   | 2/2321  | 28/18352  | 0.8855333 | 0.9351197 | 0.8830077 | 2  | POMT2/ALG11                                                                                                                                                                                                                                                                                                  |
| Molecular Function | GO:0015077 | monovalent inorganic cation transmembrane transporter activity | 41/2321 | 381/18352 | 0.8861713 | 0.9351197 | 0.8830077 | 41 | TRPM2/KCNJ15/KCNE1/KCNAB2/SLC10A1/MFSD2A/SLC45A4/FXYD2/SLC11A1/SLC24A4/SLC8A1/KCNN1/KCNQ2/SLC11A2/SLC2A9/ATP6V1B2/KCNIP1/GRIK4/SCN1A/KCNK6/SLC13A4/ASIC4/AQP1/SLC1A2/ATP2A3/SLC1A6/KCNQ1/SLC36A3/SLC1A3/SLC33A1/ATP6V0B/SLC5A10/NDUFA4L2/SLC13A5/SLC12A1/SLC12A7/SLC23A1/SLC41A1/ATP5PD/ATP6V0C/ATP6V1C<br>1 |
| Molecular Function | GO:0004867 | serine-type endopeptidase inhibitor activity                   | 9/2321  | 98/18352  | 0.8863135 | 0.9351197 | 0.8830077 | 9  | SLPI/SERPINA1/APLP2/SERPINB11/SPINT2/SERPINB2/APP/CRIM1/COL28A1                                                                                                                                                                                                                                              |
| Molecular Function | GO:0016248 | channel inhibitor activity                                     | 3/2321  | 39/18352  | 0.8865588 | 0.9351197 | 0.8830077 | 3  | ITPR1/BCL2/NEDD4                                                                                                                                                                                                                                                                                             |
| Molecular Function | GO:0005507 | copper ion binding                                             | 5/2321  | 60/18352  | 0.8910388 | 0.9393897 | 0.8870398 | 5  | LOXL3/ATOX1/S100A5/ATP7B/LOXL4                                                                                                                                                                                                                                                                               |
| Molecular Function | GO:0004520 | endodeoxyribonuclease activity                                 | 3/2321  | 40/18352  | 0.8966259 | 0.9435058 | 0.8909266 | 3  | DNASE1L3/ERCC1/SLX4                                                                                                                                                                                                                                                                                          |

|                    |            |                                                                                     |        |          |           |           |           |   |                                   |
|--------------------|------------|-------------------------------------------------------------------------------------|--------|----------|-----------|-----------|-----------|---|-----------------------------------|
| Molecular Function | GO:0016675 | oxidoreductase activity, acting on a heme group of donors                           | 2/2321 | 29/18352 | 0.8971622 | 0.9435058 | 0.8909266 | 2 | POR/NDUFA4L2                      |
| Molecular Function | GO:0016655 | oxidoreductase activity, acting on NAD(P)H, quinone or similar compound as acceptor | 5/2321 | 61/18352 | 0.8991538 | 0.9435058 | 0.8909266 | 5 | NDUFS2/NDUFS8/AIFM2/NDUFB6/TP53I3 |
| Molecular Function | GO:0000400 | four-way junction DNA binding                                                       | 1/2321 | 17/18352 | 0.8997126 | 0.9435058 | 0.8909266 | 1 | BLM                               |
| Molecular Function | GO:0005005 | transmembrane-ephrin receptor activity                                              | 1/2321 | 17/18352 | 0.8997126 | 0.9435058 | 0.8909266 | 1 | EPHB3                             |
| Molecular Function | GO:0008381 | mechanosensitive ion channel activity                                               | 1/2321 | 17/18352 | 0.8997126 | 0.9435058 | 0.8909266 | 1 | TMC1                              |
| Molecular Function | GO:0009881 | photoreceptor activity                                                              | 1/2321 | 17/18352 | 0.8997126 | 0.9435058 | 0.8909266 | 1 | GNAT2                             |
| Molecular Function | GO:0016918 | retinal binding                                                                     | 1/2321 | 17/18352 | 0.8997126 | 0.9435058 | 0.8909266 | 1 | ALDH1A2                           |
| Molecular Function | GO:0017081 | chloride channel regulator activity                                                 | 1/2321 | 17/18352 | 0.8997126 | 0.9435058 | 0.8909266 | 1 | SGK1                              |
| Molecular Function | GO:0031489 | myosin V binding                                                                    | 1/2321 | 17/18352 | 0.8997126 | 0.9435058 | 0.8909266 | 1 | RAB27A                            |

|                    |            |                                                            |         |           |           |           |           |    |                                                                          |
|--------------------|------------|------------------------------------------------------------|---------|-----------|-----------|-----------|-----------|----|--------------------------------------------------------------------------|
| Molecular Function | GO:0070628 | proteasome binding                                         | 1/2321  | 17/18352  | 0.8997126 | 0.9435058 | 0.8909266 | 1  | PSMF1                                                                    |
| Molecular Function | GO:0020037 | heme binding                                               | 13/2321 | 138/18352 | 0.9028278 | 0.9463166 | 0.8953807 | 13 | MPO/CYB5D2/ADGB/LPO/CBS/CYP4F3/HBB/CAT/FA2H/BACH1/SDHD/MB/CYB561D2       |
| Molecular Function | GO:0016859 | cis-trans isomerase activity                               | 3/2321  | 41/18352  | 0.9058814 | 0.9482075 | 0.8953662 | 3  | FKBP5/AIP/PTPA                                                           |
| Molecular Function | GO:0030547 | receptor inhibitor activity                                | 3/2321  | 41/18352  | 0.9058814 | 0.9482075 | 0.8953662 | 3  | CCL5/LY6G6D/IL1RN                                                        |
| Molecular Function | GO:0017022 | myosin binding                                             | 6/2321  | 72/18352  | 0.906498  | 0.9482075 | 0.8953662 | 6  | LMTK2/GSN/MYRIP/RAB27A/RALA/SHROOM1                                      |
| Molecular Function | GO:0046906 | tetrapyrrole binding                                       | 14/2321 | 148/18352 | 0.9067798 | 0.9482075 | 0.8953662 | 14 | MPO/CYB5D2/ADGB/LPO/CBS/CYP4F3/HBB/CD320/CAT/FA2H/BACH1/SDHD/MB/CYB561D2 |
| Molecular Function | GO:0005184 | neuropeptide hormone activity                              | 2/2321  | 30/18352  | 0.9076821 | 0.9482075 | 0.8953662 | 2  | PNOC/NPY                                                                 |
| Molecular Function | GO:0005231 | excitatory extracellular ligand-gated ion channel activity | 2/2321  | 30/18352  | 0.9076821 | 0.9482075 | 0.8953662 | 2  | P2RX1/P2RX5                                                              |
| Molecular Function | GO:0022829 | wide pore channel activity                                 | 2/2321  | 30/18352  | 0.9076821 | 0.9482075 | 0.8953662 | 2  | GJA5/GJB3                                                                |



|                    |            |                                                                                                              |         |           |           |           |           |    |                                                                                                                                                                                                                         |                  |
|--------------------|------------|--------------------------------------------------------------------------------------------------------------|---------|-----------|-----------|-----------|-----------|----|-------------------------------------------------------------------------------------------------------------------------------------------------------------------------------------------------------------------------|------------------|
| Molecular Function | GO:0004550 | nucleoside diphosphate kinase activity                                                                       | 1/2321  | 18/18352  | 0.9124078 | 0.9508618 | 0.8978726 | 1  |                                                                                                                                                                                                                         | AK5              |
| Molecular Function | GO:0008301 | DNA binding, bending                                                                                         | 1/2321  | 18/18352  | 0.9124078 | 0.9508618 | 0.8978726 | 1  |                                                                                                                                                                                                                         | HHEX             |
| Molecular Function | GO:0016894 | endonuclease activity, active with either ribo- or deoxyribonucleic acids and producing 3'-phosphomonoesters | 1/2321  | 18/18352  | 0.9124078 | 0.9508618 | 0.8978726 | 1  |                                                                                                                                                                                                                         | SLX4             |
| Molecular Function | GO:0045236 | CXCR chemokine receptor binding                                                                              | 1/2321  | 18/18352  | 0.9124078 | 0.9508618 | 0.8978726 | 1  |                                                                                                                                                                                                                         | YARS1            |
| Molecular Function | GO:0052744 | phosphatidylinositol monophosphate phosphatase activity                                                      | 1/2321  | 18/18352  | 0.9124078 | 0.9508618 | 0.8978726 | 1  |                                                                                                                                                                                                                         | INPP5F           |
| Molecular Function | GO:0022836 | gated channel activity                                                                                       | 35/2321 | 337/18352 | 0.9133388 | 0.9513763 | 0.8983584 | 35 | TRPM2/KCNJ15/CLCN6/KCNE1/KCNAB2/ITPR2/CACNA1C/CACNA2D4/ANXA6/KCNN1/KCNQ2/ITPR1/ANO7/RASA3/KCNIP1/GRIK4/SCN1A/KCNK6/ASIC4/AQP1/HTR3A/CNGA4/TPCN2/KCNQ1/TRPM3/P2RX1/TMEM37/TMC1/ANO10/ANO6/CACNA1B/P2RX5/GRID1/ANO8/PACC1 |                  |
| Molecular Function | GO:1904680 | peptide transmembrane transporter activity                                                                   | 2/2321  | 31/18352  | 0.9171873 | 0.954928  | 0.9017122 | 2  |                                                                                                                                                                                                                         | ABCC1/ABCA1      |
| Molecular Function | GO:0140223 | general transcription initiation factor activity                                                             | 3/2321  | 43/18352  | 0.9221735 | 0.9582874 | 0.9048844 | 3  |                                                                                                                                                                                                                         | TAF1C/TAF10/CCNH |
| Molecular Function | GO:0003746 | translation elongation factor activity                                                                       | 1/2321  | 19/18352  | 0.9234966 | 0.9582874 | 0.9048844 | 1  |                                                                                                                                                                                                                         | EEF1D            |

|                    |            |                                                     |        |          |           |           |           |   |                            |
|--------------------|------------|-----------------------------------------------------|--------|----------|-----------|-----------|-----------|---|----------------------------|
| Molecular Function | GO:0004551 | nucleotide diphosphatase activity                   | 1/2321 | 19/18352 | 0.9234966 | 0.9582874 | 0.9048844 | 1 | NUDT3                      |
| Molecular Function | GO:0005326 | neurotransmitter transmembrane transporter activity | 1/2321 | 19/18352 | 0.9234966 | 0.9582874 | 0.9048844 | 1 | SLC29A1                    |
| Molecular Function | GO:0016722 | oxidoreductase activity, oxidizing metal ions       | 1/2321 | 19/18352 | 0.9234966 | 0.9582874 | 0.9048844 | 1 | CYB561D2                   |
| Molecular Function | GO:0022840 | leak channel activity                               | 1/2321 | 19/18352 | 0.9234966 | 0.9582874 | 0.9048844 | 1 | KCNK6                      |
| Molecular Function | GO:0022842 | narrow pore channel activity                        | 1/2321 | 19/18352 | 0.9234966 | 0.9582874 | 0.9048844 | 1 | KCNK6                      |
| Molecular Function | GO:0030515 | snoRNA binding                                      | 2/2321 | 32/18352 | 0.9257661 | 0.959727  | 0.9062438 | 2 | NOP14/ISG20                |
| Molecular Function | GO:0048019 | receptor antagonist activity                        | 2/2321 | 32/18352 | 0.9257661 | 0.959727  | 0.9062438 | 2 | CCL5/IL1RN                 |
| Molecular Function | GO:0036002 | pre-mRNA binding                                    | 5/2321 | 65/18352 | 0.926576  | 0.9601092 | 0.9066046 | 5 | LSM1/SF1/PRPF8/CELF2/CELF1 |
| Molecular Function | GO:0005080 | protein kinase C binding                            | 4/2321 | 55/18352 | 0.9297599 | 0.9629498 | 0.9092869 | 4 | HDAC7/PRKCB/GRK5/ADCY4     |

|                    |            |                                                  |         |           |           |           |           |    |                                                                                                                                                                                                                                                                                              |
|--------------------|------------|--------------------------------------------------|---------|-----------|-----------|-----------|-----------|----|----------------------------------------------------------------------------------------------------------------------------------------------------------------------------------------------------------------------------------------------------------------------------------------------|
| Molecular Function | GO:0005216 | ion channel activity                             | 45/2321 | 431/18352 | 0.9319507 | 0.9640709 | 0.9103456 | 45 | TRPM2/KCNJ15/CLCN6/KCNE1/KCNAB2/ITPR2/CACNA1C/CACNA2D4/SLC24A4/FXYD1/PKD1L1/ANXA6/KCNN1/KCNQ2/ITPR1/ANO7/TRPM6/LRRC8C/RASA3/KCNIP1/GRIK4/SCN1A/KCNK6/ASIC4/AQP1/HTR3A/CNGA4/TPCN2/KCNQ1/LRRC8B/TRPM3/P2RX1/TMEM37/TMC1/ANO10/ANO6/CACNA1B/P2RX5/TRPV2/GRID1/ANO8/ATP5PD/CALHM5/ATP6V0C/PACC1 |
| Molecular Function | GO:0008320 | protein transmembrane transporter activity       | 1/2321  | 20/18352  | 0.9331821 | 0.9640709 | 0.9103456 | 1  | ABCA1                                                                                                                                                                                                                                                                                        |
| Molecular Function | GO:0008391 | arachidonic acid monooxygenase activity          | 1/2321  | 20/18352  | 0.9331821 | 0.9640709 | 0.9103456 | 1  | CYP4F3                                                                                                                                                                                                                                                                                       |
| Molecular Function | GO:0015299 | solute:proton antiporter activity                | 1/2321  | 20/18352  | 0.9331821 | 0.9640709 | 0.9103456 | 1  | SLC11A1                                                                                                                                                                                                                                                                                      |
| Molecular Function | GO:0140318 | protein transporter activity                     | 1/2321  | 20/18352  | 0.9331821 | 0.9640709 | 0.9103456 | 1  | ABCA1                                                                                                                                                                                                                                                                                        |
| Molecular Function | GO:0071855 | neuropeptide receptor binding                    | 2/2321  | 33/18352  | 0.9335007 | 0.9640709 | 0.9103456 | 2  | MRAP/GNAO1                                                                                                                                                                                                                                                                                   |
| Molecular Function | GO:0008188 | neuropeptide receptor activity                   | 3/2321  | 45/18352  | 0.9358446 | 0.9660331 | 0.9121985 | 3  | SORCS2/NPFFR1/PRLHR                                                                                                                                                                                                                                                                          |
| Molecular Function | GO:0015079 | potassium ion transmembrane transporter activity | 14/2321 | 156/18352 | 0.9398181 | 0.9671492 | 0.9132524 | 14 | KCNJ15/KCNE1/KCNAB2/FXYD2/SLC24A4/KCNN1/KCNQ2/KCNIP1/GRIK4/KCNK6/AQP1/KCNQ1/SLC12A1/SLC12A7                                                                                                                                                                                                  |
| Molecular Function | GO:0004993 | G protein-coupled serotonin receptor activity    | 2/2321  | 34/18352  | 0.9404672 | 0.9671492 | 0.9132524 | 2  | HRH1/CHRM2                                                                                                                                                                                                                                                                                   |

|                    |            |                                                |         |           |           |           |           |    |                                                                                                                                                                                                                                                                                                                       |
|--------------------|------------|------------------------------------------------|---------|-----------|-----------|-----------|-----------|----|-----------------------------------------------------------------------------------------------------------------------------------------------------------------------------------------------------------------------------------------------------------------------------------------------------------------------|
| Molecular Function | GO:0008175 | tRNA methyltransferase activity                | 2/2321  | 34/18352  | 0.9404672 | 0.9671492 | 0.9132524 | 2  | METTL6/METTL8                                                                                                                                                                                                                                                                                                         |
| Molecular Function | GO:009589  | serotonin receptor activity                    | 2/2321  | 34/18352  | 0.9404672 | 0.9671492 | 0.9132524 | 2  | HRH1/CHRM2                                                                                                                                                                                                                                                                                                            |
| Molecular Function | GO:0004602 | glutathione peroxidase activity                | 1/2321  | 21/18352  | 0.9416419 | 0.9671492 | 0.9132524 | 1  | MGST2                                                                                                                                                                                                                                                                                                                 |
| Molecular Function | GO:0015106 | bicarbonate transmembrane transporter activity | 1/2321  | 21/18352  | 0.9416419 | 0.9671492 | 0.9132524 | 1  | SLC26A1                                                                                                                                                                                                                                                                                                               |
| Molecular Function | GO:0051428 | peptide hormone receptor binding               | 1/2321  | 21/18352  | 0.9416419 | 0.9671492 | 0.9132524 | 1  | GNAO1                                                                                                                                                                                                                                                                                                                 |
| Molecular Function | GO:0015267 | channel activity                               | 50/2321 | 479/18352 | 0.9416539 | 0.9671492 | 0.9132524 | 50 | TRPM2/KCNJ15/CLCN6/KCNE1/KCNAB2/ITPR2/CACNA1C/CACNA2D4/SLC24A4/FXYD1/PKD1L1/ANXA6/KCNN1/GJA5/KCNQ2/ITPR1/ANO7/TRPM6/LRRC8C/RASA3/KCNIP1/GRIK4/SCN1A/KCNK6/ASIC4/AQP1/HTR3A/CNGA4/TPCN2/KCNQ1/GJB3/LRRC8B/TRPM3/BCL2/AQP3/P2RX1/TMEM37/TMC1/ANO10/ANO6/CACNA1B/P2RX5/TRPV2/GRID1/ANO8/AQP9/ATP5PD/CALHM5/ATP6VOC/PACC1 |
| Molecular Function | GO:0003954 | NADH dehydrogenase activity                    | 3/2321  | 46/18352  | 0.9418149 | 0.9671492 | 0.9132524 | 3  | NDUFS2/NDUFS8/NDUFB6                                                                                                                                                                                                                                                                                                  |
| Molecular Function | GO:0008137 | NADH dehydrogenase (ubiquinone) activity       | 3/2321  | 46/18352  | 0.9418149 | 0.9671492 | 0.9132524 | 3  | NDUFS2/NDUFS8/NDUFB6                                                                                                                                                                                                                                                                                                  |
| Molecular Function | GO:0050136 | NADH dehydrogenase (quinone) activity          | 3/2321  | 46/18352  | 0.9418149 | 0.9671492 | 0.9132524 | 3  | NDUFS2/NDUFS8/NDUFB6                                                                                                                                                                                                                                                                                                  |

|                    |            |                                                                    |         |           |           |           |           |    |                                                                                                                                                                                                                                                                                                                       |
|--------------------|------------|--------------------------------------------------------------------|---------|-----------|-----------|-----------|-----------|----|-----------------------------------------------------------------------------------------------------------------------------------------------------------------------------------------------------------------------------------------------------------------------------------------------------------------------|
| Molecular Function | GO:0022803 | passive transmembrane transporter activity                         | 50/2321 | 480/18352 | 0.9436003 | 0.9685256 | 0.914552  | 50 | TRPM2/KCNJ15/CLCN6/KCNE1/KCNAB2/ITPR2/CACNA1C/CACNA2D4/SLC24A4/FXYD1/PKD1L1/ANXA6/KCNN1/GJA5/KCNQ2/ITPR1/ANO7/TRPM6/LRRC8C/RASA3/KCNIP1/GRIK4/SCN1A/KCNK6/ASIC4/AQP1/HTR3A/CNGA4/TPCN2/KCNQ1/GJB3/LRRC8B/TRPM3/BCL2/AQP3/P2RX1/TMEM37/TMC1/ANO10/ANO6/CACNA1B/P2RX5/TRPV2/GRID1/ANO8/AQP9/ATP5PD/CALHM5/ATP6VOC/PACC1 |
| Molecular Function | GO:0016891 | endoribonuclease activity, producing 5'-phosphomonoesters          | 2/2321  | 35/18352  | 0.9467362 | 0.9712862 | 0.9171588 | 2  | AGO2/EDC3                                                                                                                                                                                                                                                                                                             |
| Molecular Function | GO:0005267 | potassium channel activity                                         | 10/2321 | 120/18352 | 0.9480854 | 0.972212  | 0.918033  | 10 | KCNJ15/KCNE1/KCNAB2/KCNN1/KCNQ2/KCNIP1/GRIK4/KCNK6/AQP1/KCNQ1                                                                                                                                                                                                                                                         |
| Molecular Function | GO:0015464 | acetylcholine receptor activity                                    | 1/2321  | 22/18352  | 0.9490309 | 0.9722652 | 0.9180833 | 1  | CHRM2                                                                                                                                                                                                                                                                                                                 |
| Molecular Function | GO:0022884 | macromolecule transmembrane transporter activity                   | 1/2321  | 22/18352  | 0.9490309 | 0.9722652 | 0.9180833 | 1  | ABCA1                                                                                                                                                                                                                                                                                                                 |
| Molecular Function | GO:0016597 | amino acid binding                                                 | 4/2321  | 59/18352  | 0.9508335 | 0.9736535 | 0.9193942 | 4  | DPYS/DDC/AGXT/SLC1A3                                                                                                                                                                                                                                                                                                  |
| Molecular Function | GO:0005248 | voltage-gated sodium channel activity                              | 1/2321  | 23/18352  | 0.9554848 | 0.9774964 | 0.923023  | 1  | SCN1A                                                                                                                                                                                                                                                                                                                 |
| Molecular Function | GO:0008171 | O-methyltransferase activity                                       | 1/2321  | 23/18352  | 0.9554848 | 0.9774964 | 0.923023  | 1  | COMT                                                                                                                                                                                                                                                                                                                  |
| Molecular Function | GO:0016251 | RNA polymerase II general transcription initiation factor activity | 2/2321  | 37/18352  | 0.957436  | 0.9781227 | 0.9236143 | 2  | TAF10/CCNH                                                                                                                                                                                                                                                                                                            |

|                    |            |                                                                                              |         |           |           |           |           |    |                                                                                                                                                                                                                                                                                        |
|--------------------|------------|----------------------------------------------------------------------------------------------|---------|-----------|-----------|-----------|-----------|----|----------------------------------------------------------------------------------------------------------------------------------------------------------------------------------------------------------------------------------------------------------------------------------------|
| Molecular Function | GO:0042056 | chemoattractant activity                                                                     | 2/2321  | 37/18352  | 0.957436  | 0.9781227 | 0.9236143 | 2  | CCL5/PDGFB                                                                                                                                                                                                                                                                             |
| Molecular Function | GO:0140101 | catalytic activity, acting on a tRNA                                                         | 10/2321 | 123/18352 | 0.9574455 | 0.9781227 | 0.9236143 | 10 | CARS2/METTL6/FTO/CDKAL1/DUS2/EARS2/METTL8/MARS1/GATB/YARS1                                                                                                                                                                                                                             |
| Molecular Function | GO:0099529 | neurotransmitter receptor activity involved in regulation of postsynaptic membrane potential | 3/2321  | 50/18352  | 0.9608968 | 0.9800379 | 0.9254228 | 3  | GRIK4/GABBR1/GRID1                                                                                                                                                                                                                                                                     |
| Molecular Function | GO:0005212 | structural constituent of eye lens                                                           | 1/2321  | 24/18352  | 0.9611218 | 0.9800379 | 0.9254228 | 1  | CRYBB1                                                                                                                                                                                                                                                                                 |
| Molecular Function | GO:0008649 | rRNA methyltransferase activity                                                              | 1/2321  | 24/18352  | 0.9611218 | 0.9800379 | 0.9254228 | 1  | FBL                                                                                                                                                                                                                                                                                    |
| Molecular Function | GO:0140102 | catalytic activity, acting on a rRNA                                                         | 1/2321  | 24/18352  | 0.9611218 | 0.9800379 | 0.9254228 | 1  | FBL                                                                                                                                                                                                                                                                                    |
| Molecular Function | GO:0008200 | ion channel inhibitor activity                                                               | 2/2321  | 38/18352  | 0.9619811 | 0.9804548 | 0.9258164 | 2  | ITPR1/NEDD4                                                                                                                                                                                                                                                                            |
| Molecular Function | GO:0030546 | signaling receptor activator activity                                                        | 50/2321 | 492/18352 | 0.9630326 | 0.9810669 | 0.9263945 | 50 | SEMA6B/IL27/TGFA/IL10/IL16/TNF/CCL5/TNFSF13B/PNOC/SEMA4A/TG/SEMA4B/APP/WNT11/TGFB1/IL1RN/SEMA4D/DGKQ/PDGFD/CSF3/CMTM7/CCL20/GMFB/GHRL/CD320/WNT5B/C10orf99/GRN/PDGFB/CMTM5/PRKCE/PDGF6/TNFSF12/TNFSF13/CRLF1/GMFG/SCGB3A1/CCL27/NPY/INHBA/NODAL/NTF4/CCL22/LIF/VSTM1/SST/FGF14/ANGPTL8 |
| Molecular Function | GO:0008227 | G protein-coupled amine receptor activity                                                    | 3/2321  | 51/18352  | 0.9646506 | 0.9822553 | 0.9275167 | 3  | HRH1/CHRM2/ZNF219                                                                                                                                                                                                                                                                      |

|                    |            |                                                                           |         |           |           |           |           |    |                                                                                                                                                                                                                                  |
|--------------------|------------|---------------------------------------------------------------------------|---------|-----------|-----------|-----------|-----------|----|----------------------------------------------------------------------------------------------------------------------------------------------------------------------------------------------------------------------------------|
| Molecular Function | GO:0005230 | extracellular ligand-gated ion channel activity                           | 5/2321  | 74/18352  | 0.9654773 | 0.9822964 | 0.9275554 | 5  | GRIK4/HTR3A/P2RX1/P2RX5/GRID1                                                                                                                                                                                                    |
| Molecular Function | GO:0005104 | fibroblast growth factor receptor binding                                 | 1/2321  | 25/18352  | 0.9660452 | 0.9822964 | 0.9275554 | 1  | FRS3                                                                                                                                                                                                                             |
| Molecular Function | GO:0070330 | aromatase activity                                                        | 1/2321  | 25/18352  | 0.9660452 | 0.9822964 | 0.9275554 | 1  | CYP4F3                                                                                                                                                                                                                           |
| Molecular Function | GO:0140098 | catalytic activity, acting on RNA                                         | 38/2321 | 390/18352 | 0.9692251 | 0.9848281 | 0.929946  | 38 | RNASE3/MOV10L1/EXOSC2/ERN1/CPSF3/SLFN14/POLR2F/RCL1/ZC3H12D/CRCP/IGHMBP2/CARS2/DDX27/AGO2/EDC3/METTL6/NOB1/ERI3/SMG6/FTO/CDKAL1/RMRP/DHX16/DIS3L2/DDX41/DUS2/SND1/EARS2/TOE1/FBL/TUT1/ISG20/RPAP1/METTL8/POLR1D/MARS1/GATB/YARS1 |
| Molecular Function | GO:0042923 | neuropeptide binding                                                      | 1/2321  | 26/18352  | 0.9703453 | 0.9848281 | 0.929946  | 1  | SORL1                                                                                                                                                                                                                            |
| Molecular Function | GO:0102567 | phospholipase A2 activity (consuming 1,2-dipalmitoylphosphatidylcholine)  | 1/2321  | 26/18352  | 0.9703453 | 0.9848281 | 0.929946  | 1  | PLA2G15                                                                                                                                                                                                                          |
| Molecular Function | GO:0102568 | phospholipase A2 activity consuming 1,2-dioleoylphosphatidylethanolamine) | 1/2321  | 26/18352  | 0.9703453 | 0.9848281 | 0.929946  | 1  | PLA2G15                                                                                                                                                                                                                          |
| Molecular Function | GO:0098960 | postsynaptic neurotransmitter receptor activity                           | 4/2321  | 65/18352  | 0.9717625 | 0.9858067 | 0.9308701 | 4  | GRIK4/CHRM2/GABBR1/GRID1                                                                                                                                                                                                         |
| Molecular Function | GO:0003724 | RNA helicase activity                                                     | 5/2321  | 77/18352  | 0.9734496 | 0.9861793 | 0.9312219 | 5  | MOV10L1/IGHMBP2/DDX27/DHX16/DDX41                                                                                                                                                                                                |

|                    |            |                                                                               |         |           |           |           |           |    |                                                                                                          |
|--------------------|------------|-------------------------------------------------------------------------------|---------|-----------|-----------|-----------|-----------|----|----------------------------------------------------------------------------------------------------------|
| Molecular Function | GO:0005249 | voltage-gated potassium channel activity                                      | 6/2321  | 88/18352  | 0.9734516 | 0.9861793 | 0.9312219 | 6  | KCNJ15/KCNE1/KCNAB2/KCNQ2/KCNK6/KCNQ1                                                                    |
| Molecular Function | GO:0022843 | voltage-gated cation channel activity                                         | 11/2321 | 140/18352 | 0.9734894 | 0.9861793 | 0.9312219 | 11 | KCNJ15/KCNE1/KCNAB2/CACNA1C/CACNA2D4/KCNQ2/KCNK6/TPCN2/KCNQ1/TMC1/CACNA1B                                |
| Molecular Function | GO:0046875 | ephrin receptor binding                                                       | 1/2321  | 27/18352  | 0.9741011 | 0.9863397 | 0.9313734 | 1  | SIPA1L1                                                                                                  |
| Molecular Function | GO:0019905 | syntaxin binding                                                              | 5/2321  | 78/18352  | 0.9757016 | 0.987364  | 0.9323406 | 5  | VPS18/ABCA1/SYT17/RNF40/SYPL2                                                                            |
| Molecular Function | GO:0004129 | cytochrome-c oxidase activity                                                 | 1/2321  | 28/18352  | 0.9773814 | 0.987364  | 0.9323406 | 1  | NDUFA4L2                                                                                                 |
| Molecular Function | GO:0015002 | heme-copper terminal oxidase activity                                         | 1/2321  | 28/18352  | 0.9773814 | 0.987364  | 0.9323406 | 1  | NDUFA4L2                                                                                                 |
| Molecular Function | GO:0016676 | oxidoreductase activity, acting on a heme group of donors, oxygen as acceptor | 1/2321  | 28/18352  | 0.9773814 | 0.987364  | 0.9323406 | 1  | NDUFA4L2                                                                                                 |
| Molecular Function | GO:0017056 | structural constituent of nuclear pore                                        | 1/2321  | 28/18352  | 0.9773814 | 0.987364  | 0.9323406 | 1  | NUP93                                                                                                    |
| Molecular Function | GO:0005244 | voltage-gated ion channel activity                                            | 16/2321 | 197/18352 | 0.9834527 | 0.9925757 | 0.9372619 | 16 | KCNJ15/CLCN6/KCNE1/KCNAB2/CACNA1C/CACNA2D4/KCNQ2/KCNIP1/SCN1A/KCNK6/TPCN2/KCNQ1/TMEM37/TMC1/ANO6/CACNA1B |



|                    |            |                                                                                                                                                                                             |         |           |           |           |           |    |                                                                                                                                                                                                                                                                                   |
|--------------------|------------|---------------------------------------------------------------------------------------------------------------------------------------------------------------------------------------------|---------|-----------|-----------|-----------|-----------|----|-----------------------------------------------------------------------------------------------------------------------------------------------------------------------------------------------------------------------------------------------------------------------------------|
| Molecular Function | GO:0022832 | voltage-gated channel activity                                                                                                                                                              | 16/2321 | 197/18352 | 0.9834527 | 0.9925757 | 0.9372619 | 16 | KCNJ15/CLCN6/KCNE1/KCNAB2/CACNA1C/CACNA2D4/KCNQ2/KCNIP1/SCN1A/KCNK6/TPCN2/KCNQ1/TMEM37/TMC1/ANO6/CACNA1B                                                                                                                                                                          |
| Molecular Function | GO:0048018 | receptor ligand activity                                                                                                                                                                    | 47/2321 | 487/18352 | 0.9841316 | 0.9926092 | 0.9372935 | 47 | SEMA6B/IL27/TGFA/IL10/IL16/TNF/CCL5/TNFSF13B/PNOC/SEMA4A/TG/SEMA4B/WNT11/TGFB1/IL1RN/SEMA4D/PDGFD/CSF3/CMTM7/CCL20/GMFB/GHRL/CD320/WNT5B/C10orf99/GRN/PDGFB/CMTM5/PDGFC/NPPC/GDF6/TNFSF12/TNFSF13/CRLF1/GMFG/SCGB3A1/CCL27/NPY/INHBA/NODAL/NTF4/CCL22/LIF/VSTM1/SST/FGF14/ANGPTL8 |
| Molecular Function | GO:0003823 | antigen binding                                                                                                                                                                             | 13/2321 | 168/18352 | 0.9843983 | 0.9926092 | 0.9372935 | 13 | MFAP4/MAML1/IGHV6-1/SPON2/HLA-C/HLA-F/TGFB1/FCN1/LILRB4/SLC7A5/TRGV9/PPP2R1A/SLC7A8                                                                                                                                                                                               |
| Molecular Function | GO:0022824 | transmitter-gated ion channel activity                                                                                                                                                      | 3/2321  | 60/18352  | 0.9860887 | 0.9933653 | 0.9380075 | 3  | GRIK4/HTR3A/GRID1                                                                                                                                                                                                                                                                 |
| Molecular Function | GO:0022835 | transmitter-gated channel activity                                                                                                                                                          | 3/2321  | 60/18352  | 0.9860887 | 0.9933653 | 0.9380075 | 3  | GRIK4/HTR3A/GRID1                                                                                                                                                                                                                                                                 |
| Molecular Function | GO:1904315 | transmitter-gated ion channel activity involved in regulation of postsynaptic membrane potential                                                                                            | 2/2321  | 47/18352  | 0.9865176 | 0.9933653 | 0.9380075 | 2  | GRIK4/GRID1                                                                                                                                                                                                                                                                       |
| Molecular Function | GO:0004623 | phospholipase A2 activity                                                                                                                                                                   | 1/2321  | 33/18352  | 0.9885096 | 0.9949106 | 0.9394667 | 1  | PLA2G15                                                                                                                                                                                                                                                                           |
| Molecular Function | GO:0005179 | hormone activity                                                                                                                                                                            | 8/2321  | 122/18352 | 0.9902687 | 0.9962204 | 0.9407034 | 8  | PNOC/TG/GHRL/NPPC/NPY/INHBA/SST/ANGPTL8                                                                                                                                                                                                                                           |
| Molecular Function | GO:0016712 | oxidoreductase activity, acting on paired donors, with incorporation or reduction of molecular oxygen, reduced flavin or flavoprotein as one donor, and incorporation of one atom of oxygen | 1/2321  | 35/18352  | 0.9912368 | 0.996427  | 0.9408985 | 1  | CYP4F3                                                                                                                                                                                                                                                                            |

|                    |            |                                                            |         |           |           |           |           |    |                                                                                                                                                                                                                                              |
|--------------------|------------|------------------------------------------------------------|---------|-----------|-----------|-----------|-----------|----|----------------------------------------------------------------------------------------------------------------------------------------------------------------------------------------------------------------------------------------------|
| Molecular Function | GO:0004497 | monooxygenase activity                                     | 6/2321  | 101/18352 | 0.9913899 | 0.996427  | 0.9408985 | 6  | MICAL1/MICAL2/MICAL3/AKR1D1/CYP4F3/POR                                                                                                                                                                                                       |
| Molecular Function | GO:0004175 | endopeptidase activity                                     | 40/2321 | 440/18352 | 0.9925502 | 0.9971326 | 0.9415649 | 40 | AZU1/ELANE/CTS2/PRTN3/CTSG/PLAU/ASPRV1/CAPN14/ADGB/MBTPS1/RHBDD2/SPG7/MIPEP/CTSD/HM13/CTSH/USP36/MASP1/PCSK6/PREP/CPNE1/F12/COP55/ADAMTS13/ADAMTSL5/C1S/HTRA4/CTSB/PRSS50/CASP7/TMPRSS9/USP49/PSMB7/LTF/CASP1/HTRA3/USP2/ADAMDEC1/USP35/C1RL |
| Molecular Function | GO:0008173 | RNA methyltransferase activity                             | 3/2321  | 69/18352  | 0.9947208 | 0.998852  | 0.9431885 | 3  | METTL6/FBL/METTL8                                                                                                                                                                                                                            |
| Molecular Function | GO:0004222 | metalloendopeptidase activity                              | 6/2321  | 108/18352 | 0.9954462 | 0.9991194 | 0.943441  | 6  | SPG7/MIPEP/COP55/ADAMTS13/ADAMTSL5/ADAMDEC1                                                                                                                                                                                                  |
| Molecular Function | GO:0030594 | neurotransmitter receptor activity                         | 6/2321  | 111/18352 | 0.996554  | 0.9997702 | 0.9440554 | 6  | GRIK4/HRH1/HTR3A/CHRM2/GABBR1/GRID1                                                                                                                                                                                                          |
| Molecular Function | GO:0034987 | immunoglobulin receptor binding                            | 2/2321  | 80/18352  | 0.9997528 | 1         | 0.9442724 | 2  | FGR/IGHV6-1                                                                                                                                                                                                                                  |
| Molecular Function | GO:0019843 | rRNA binding                                               | 1/2321  | 64/18352  | 0.9998283 | 1         | 0.9442724 | 1  | RPL23A                                                                                                                                                                                                                                       |
| Molecular Function | GO:0005549 | odorant binding                                            | 1/2321  | 103/18352 | 0.9999991 | 1         | 0.9442724 | 1  | LCN2                                                                                                                                                                                                                                         |
| Molecular Function | GO:0150100 | RNA binding involved in posttranscriptional gene silencing | 12/2321 | 274/18352 | 0.9999992 | 1         | 0.9442724 | 12 | MIR140/MIR143/MIR145/ZAR1L/MIR199A1/MIR101-2/MIR24-2/MIR27A/MIR23A/MIR138-2/MIR199A2/MIR1207                                                                                                                                                 |

|                    |            |                                                             |         |           |           |   |           |    |                                                                                              |
|--------------------|------------|-------------------------------------------------------------|---------|-----------|-----------|---|-----------|----|----------------------------------------------------------------------------------------------|
| Molecular Function | GO:1903231 | mRNA binding involved in posttranscriptional gene silencing | 12/2321 | 274/18352 | 0.9999992 | 1 | 0.9442724 | 12 | MIR140/MIR143/MIR145/ZAR1L/MIR199A1/MIR101-2/MIR24-2/MIR27A/MIR23A/MIR138-2/MIR199A2/MIR1207 |
| Molecular Function | GO:0003735 | structural constituent of ribosome                          | 4/2321  | 202/18352 | 1         | 1 | 0.9442724 | 4  | MRPL3/MRPS21/MRPL28/RPL23A                                                                   |
| Molecular Function | GO:0004984 | olfactory receptor activity                                 | 1/2321  | 427/18352 | 1         | 1 | 0.9442724 | 1  | OR52N2                                                                                       |
