# Supplementary material for: A Sight of the Diagnostic Value of Aberrant Cell-Free DNA Methylation in Lung Cancer
Source: Hindawi journal article supplement (doi:10.1155/2022/9619357), 2022-01-27
Supplement: f8 [file 9619357.f8.pdf]

**Table S5. Primer sequences for pyrosequencing**

| Gene  | Primer | Sequence                        |
|-------|--------|---------------------------------|
| TRAF1 | Fwd    | GTGTTATAGATTTTTAGAAAGTATAGTGAGA |
|       | Rev    | AAACACAAACCAAAAACCAACTATA       |
|       | Seq    | TGGTTGAGAATAGTAGGTTGT           |
| RPTOR | Fwd    | AAGGGGATTAGTGGAGGATATT          |
|       | Rev    | AAATAAAAAATATACRTATCACAAATCAC   |
|       | Seq    | GGTAGGGTTGTTGTAGG               |
| SPON2 | Fwd    | TTYGTTTGGAGGTTAAGGTTG           |
|       | Rev    | ACTTATAAAACAAACCCACCCTC         |
|       | Seq    | CAAACCCACCCTCCAAC               |
