# Supplementary material for: A Sight of the Diagnostic Value of Aberrant Cell-Free DNA Methylation in Lung Cancer
Source: Hindawi journal article supplement (doi:10.1155/2022/9619357), 2022-01-27
Supplement: f9 [file 9619357.f9.pdf]

**Table S6. Two-sample Kolmogorov-Smirnov test in cfDNA samples**  
**alternative hypothesis: the CDF of cancer samples lies above that of normal samples**

| Gene  | D <sup>+</sup> | p value  |
|-------|----------------|----------|
| TRAF1 | 0.60976        | 0.03637  |
| RPTOR | 0.65854        | 0.02096  |
| SPON2 | 0.78049        | 0.004385 |
